# Supplementary material
Source: HighWire-hosted journal article supplement (https://thorax.bmj.com/content/thoraxjnl-2019-213485)

**Figure S1. Pearson correlation of different genes in High-throughput qPCR.** X and Y axis are Ct values. Each data point is a positive reaction of the unique gene. **A.** *B-globin* with *Actin*, **B.** *mefA* with *MatA/mel*, **C.** *tetM-01* with *tetM-02*, **D.** *SulA/folP-01* with *SulA/folP-03*, **E.** *tetB-01* with *tetB-02*, **F.** *tetC-01* with *tetC-02* **G.** *ermB* with *tetM* **H.** *tetO* with *tetW*

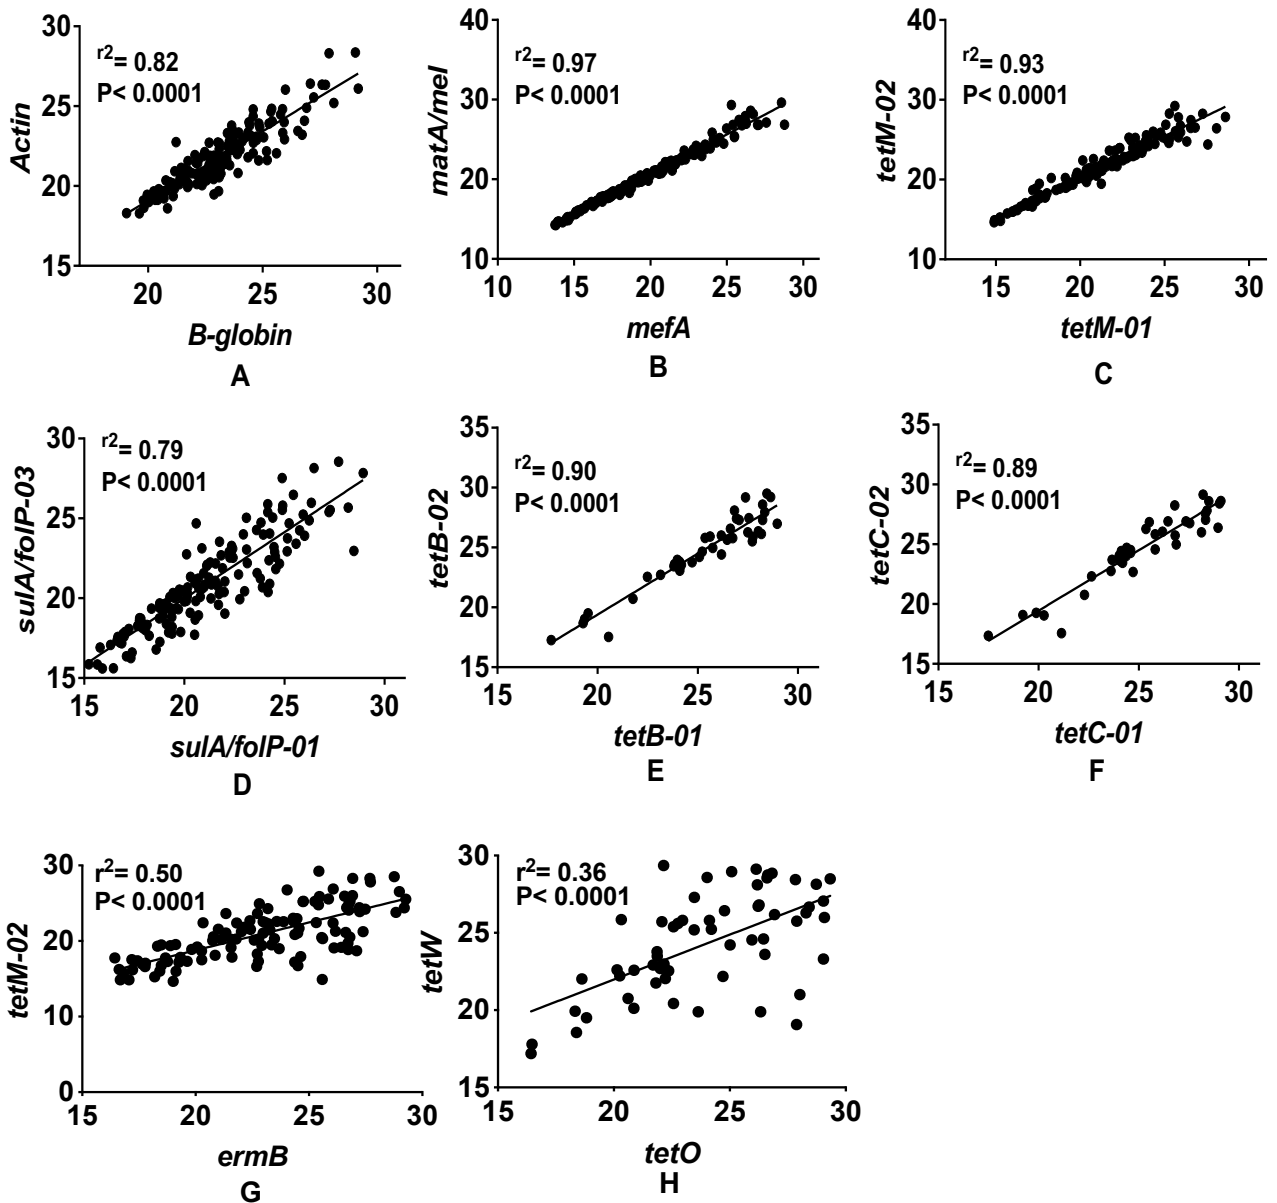

Supplement: inline-supplementary-material-1 [file inline-supplementary-material-1.pdf]
