# Supplementary material
Source: HighWire-hosted journal article supplement (https://thorax.bmj.com/content/thoraxjnl-2019-213485)
Supplement: inline-supplementary-material-2 [file inline-supplementary-material-2.pdf]

## 1 High Throughput qPCR validation and controls

2 The PCR mixture for this assay consisted of 50 nl of 2×LightCycler 480 SYBR® Green I Master Mix (Roche  
3 Inc., USA), 10 nl of each forward and reverse primers with the final concentration of 1 µM, 20 nl of  
4 DNase and RNase free distilled water and finally 10 nl of DNA template making the final reaction  
5 volume 100 nl. A non-template control was included per chip. Cycling conditions were described  
6 previously.[1] Samples with multiple melting peaks as well as amplification efficiency beyond the  
7 range 1·8-2·2 were discarded. The absolute copy number of 16S rRNA gene was quantified separately  
8 by Roche 480 using a SYBR® Green approach. *Moraxella catarrhalis* genomic DNA was used as standard  
9 and the same primers and cycling conditions, used in high-throughput qPCR were used for this assay.

10

11 A total of fourteen chips with a 16 (samples) x 296 (assays) format were used. In each chip 15 DNA  
12 extracts plus one non-template control were amplified. Each sample was run as a single replicate. As  
13 validation of the methodology four ARG primer pairs were continually positive in the non-  
14 template control and were therefore discarded from the analysis. Additionally, two multidrug  
15 resistant *Klebsiella pneumoniae* with known ARG profiles were used as positive controls and for these  
16 the expected ARG profile was obtained. Three concentrations of human genomic DNA (Bioline) of  
17  $2·8 \times 10^2$ ,  $2·8 \times 10^3$  and  $2·8 \times 10^4$  genomes/µl respectively were used to determine whether a high  
18 background contamination of human DNA could cause false positives in ARG amplification; no  
19 interference was observed by the presence of human DNA in the amplification of ARGs detected in  
20 this study. Finally, a single background contamination control of the DNA extraction procedure was  
21 included for which no ARGs were detected. A threshold cycle (Ct) less than 31 was used as the  
22 detection limit based on the previous studies.[1-8]

23

24 Though each sample was run as a single replicate internal controls support the strength of data. β -  
25 globin and actin, human housekeeping genes, showed the significant correlation which would be  
26 expected (figS1 A). Moreover, there were strong correlations observed among a number of other

27 genes which would be predicted to be linked figS1 B-H). Such links could be due to them being in the  
28 same operon (*mefA* and *matA/mel*), upon the same mobile genomic element (*ermB* and *tetM*), or by  
29 them being mosaic genes (*tetO* and *tetW*).

30

31

32

33

34 **Table S1: Correlation between prevalence of ARGs per subject and clinical parameters in a) all**  
 35 **subjects b) subjects that received the antibiotics amoxicillin or co-amoxiclav.**

36

| A                                             |         | Stable | Exacerbation | Recovery | $\Delta\Delta$ Stable-Exacerbation | $\Delta\Delta$ Exacerbation-Recovery |
|-----------------------------------------------|---------|--------|--------------|----------|------------------------------------|--------------------------------------|
|                                               |         |        |              |          |                                    |                                      |
| Post-bronchodilator FEV <sub>1</sub> , L<br>* | r       | 0.07   | 0.12         | -0.11    | -0.02                              | -0.23                                |
|                                               | p value | 0.59   | 0.41         | 0.41     | 0.91                               | 0.10                                 |
| mCRQ**                                        | r       | -0.07  | -0.16        | 0.13     | -0.26                              | -0.18                                |
|                                               | p value | 0.61   | 0.26         | 0.35     | 0.05                               | 0.20                                 |
| Total VAS***                                  | r       | 0.11   | -0.17        | -0.17    | 0.06                               | 0.11                                 |
|                                               | p value | 0.44   | 0.21         | 0.21     | 0.70                               | 0.41                                 |

37

| B                                             |         | Stable | Exacerbation | Recovery | $\Delta\Delta$ Stable-Exacerbation | $\Delta\Delta$ Exacerbation-Recovery |
|-----------------------------------------------|---------|--------|--------------|----------|------------------------------------|--------------------------------------|
|                                               |         |        |              |          |                                    |                                      |
| Post-bronchodilator FEV <sub>1</sub> , L<br>* | r       | -0.05  | -0.13        | -0.27    | -0.22                              | <b>-0.38</b>                         |
|                                               | p value | 0.79   | 0.46         | 0.12     | 0.21                               | <b>0.03</b>                          |
| mCRQ                                          | r       | -0.17  | -0.21        | 0.00     | -0.25                              | <b>-0.34</b>                         |
|                                               | p value | 0.33   | 0.22         | 0.98     | 0.15                               | <b>0.04</b>                          |
| Total VAS                                     | r       | 0.20   | -0.12        | -0.14    | 0.23                               | 0.08                                 |
|                                               | p value | 0.28   | 0.51         | 0.42     | 0.23                               | 0.65                                 |

38 \* FEV<sub>1</sub> = forced expiratory volume in 1 second ; \*\* CRQ = Chronic Respiratory Disease Questionnaire score;

39 \*\*\*VAS = visual analog score

40

41

42

43

44

45

46

47

48

49

50

51

52 **Table S2. List of Individual genes for each ARG family in the same order as present in figure 2 & S2**  
 53 **heatmaps. MLSB, Macrolide-Lincosamide-Streptogramin B resistance**

| <b>β-lactam</b>    | <b>MLSB</b>       | <b>Multidrug</b>     | <b>Tetracycline</b> |
|--------------------|-------------------|----------------------|---------------------|
| <i>ampC-01</i>     | <i>erm(36)</i>    | <i>acrA-01</i>       | <i>tet(32)</i>      |
| <i>ampC-04</i>     | <i>ermA/ermTR</i> | <i>acrA-04</i>       | <i>tet(37)</i>      |
| <i>ampC/blaDHA</i> | <i>ermB</i>       | <i>acrA-05</i>       | <i>tetA-01</i>      |
| <i>bla-L1</i>      | <i>ermC</i>       | <i>acrF</i>          | <i>tetB-01</i>      |
| <i>blaCMY2-01</i>  | <i>ermF</i>       | <i>ceoA</i>          | <i>tetB-02</i>      |
| <i>blaCMY2-02</i>  | <i>ermX</i>       | <i>emrD</i>          | <i>tetC-01</i>      |
| <i>blaCTX-M-02</i> | <i>matA/mel</i>   | <i>mepA</i>          | <i>tetC-02</i>      |
| <i>blaCTX-M-04</i> | <i>mefA</i>       | <i>mexE</i>          | <i>tetG-02</i>      |
| <i>blaOXY</i>      | <i>mphA-01</i>    | <i>mexF</i>          | <i>tetK</i>         |
| <i>blaSFO</i>      | <i>mphA-02</i>    | <i>mtrD-02</i>       | <i>tetM-01</i>      |
| <i>blaTEM</i>      | <i>msrA-01</i>    | <i>mtrD-03</i>       | <i>tetM-02</i>      |
| <i>blaZ</i>        | <i>pikR2</i>      | <i>oprD</i>          | <i>tetO-01</i>      |
| <i>cfiA</i>        |                   | <i>oprJ</i>          | <i>tetPB-02</i>     |
| <i>cfxA</i>        |                   | <i>pmrA</i>          | <i>tetQ</i>         |
| <i>cphA-01</i>     |                   | <i>qacEdelta1-02</i> | <i>tetR-02</i>      |
| <i>cphA-02</i>     |                   | <i>qacH-01</i>       | <i>tetR-03</i>      |
| <i>fox5</i>        |                   | <i>tolC-02</i>       | <i>tetW-01</i>      |
| <i>pbp2x</i>       |                   | <i>tolC-03</i>       |                     |
|                    |                   | <i>yclL/mdtH-01</i>  |                     |
|                    |                   | <i>yidY/mdtL-01</i>  |                     |

54  
55  
56  
57  
58  
59  
60  
61  
62  
63  
64  
65  
66  
67  
68  
69  
70  
71  
72  
73  
74  
75  
76  
77  
78  
79  
80  
81  
82  
83  
84  
85  
86  
87  
88  
89  
90  
91

## References

1. Xu, L., et al., *High-throughput profiling of antibiotic resistance genes in drinking water treatment plants and distribution systems*. Environ Pollut, 2016. **213**: p. 119-26.
2. Wang, F.H., et al., *High throughput profiling of antibiotic resistance genes in urban park soils with reclaimed water irrigation*. Environ Sci Technol, 2014. **48**(16): p. 9079-85.
3. Ouyang, W.Y., et al., *Increased levels of antibiotic resistance in urban stream of Jiulongjiang River, China*. Appl Microbiol Biotechnol, 2015. **99**(13): p. 5697-707.
4. Chen, Q.-L., et al., *An underappreciated hotspot of antibiotic resistance: The groundwater near the municipal solid waste landfill*. Sci Total Environ, 2017. **609**: p. 966-973.
5. Chen, Q.-L., et al., *Do manure-borne or indigenous soil microorganisms influence the spread of antibiotic resistance genes in manured soil?* Soil Biology and Biochemistry, 2017. **114**: p. 229-237.
6. Zhu, Y.G., et al., *Continental-scale pollution of estuaries with antibiotic resistance genes*. Nat Microbiol, 2017. **2**: p. 16270.
7. Zhao, Y., et al., *Feed additives shift gut microbiota and enrich antibiotic resistance in swine gut*. Sci Total Environ, 2018. **621**: p. 1224-1232.
8. Chen, Q.-L., et al., *Effect of biochar amendment on the alleviation of antibiotic resistance in soil and phyllosphere of Brassica chinensis L*. Soil Biology and Biochemistry, 2018. **119**: p. 74-82.
