# Supplementary material
Source: HighWire-hosted journal article supplement (https://thorax.bmj.com/content/thoraxjnl-2019-213485)

**Figure S3. The number of positive reactions for each individual ARG across all subjects based on prescribed antibiotics (A:D). Non-parametric repeated ANOVA (Friedman test) was used to compare stable, exacerbation and recovery in COPD samples.**

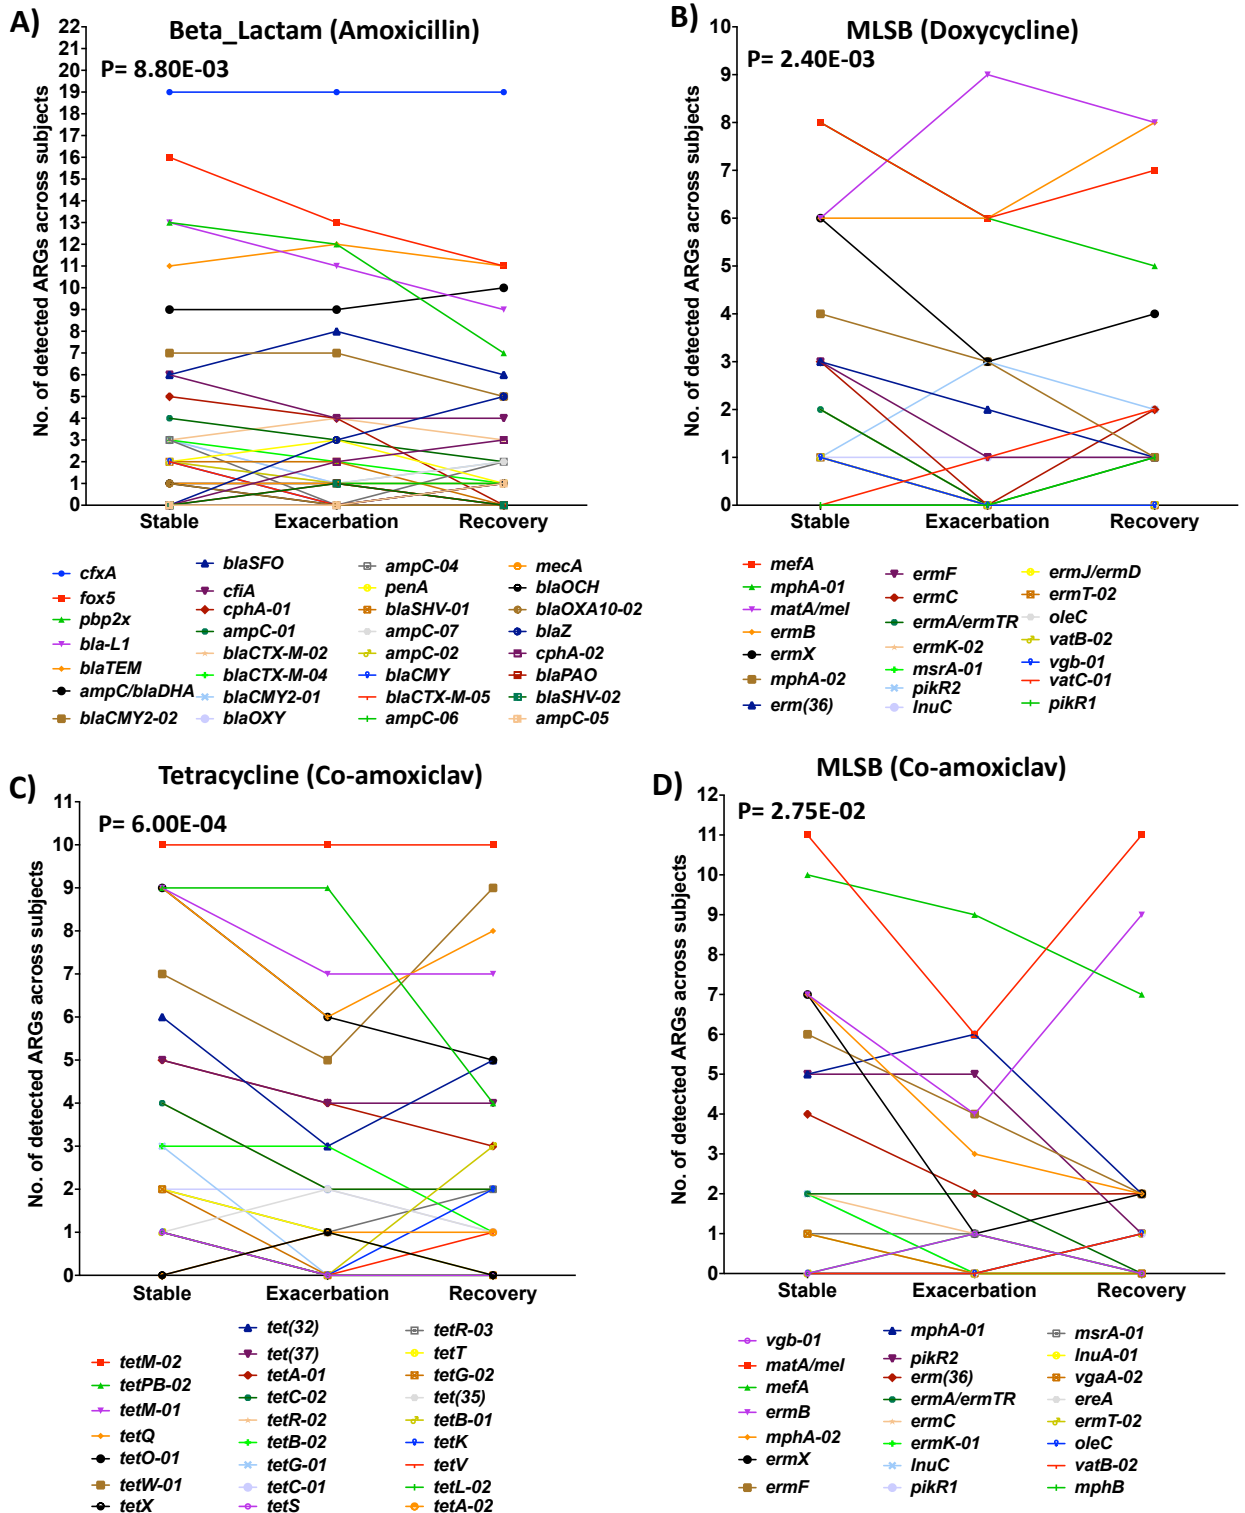

Supplement: inline-supplementary-material-4 [file inline-supplementary-material-4.pdf]
