# Supplementary material
Source: HighWire-hosted journal article supplement (https://thorax.bmj.com/content/thoraxjnl-2019-213485)

**Figure S4. A. the total bacterial load (y axis) comparison between bacterial DNA extraction kit and Human DNA extraction kit in 4 individuals (x axis). B:G different bacterial phyla Ct value in each individual (1 to 4). B. Actinobacteria, C. Gammaproteobacteria, D. Betaproteobacteria, E. Fusobacteria, F. Firmicutes, G. Bacteroidetes. Error bars are mean with SEM. The higher Ct value the lower DNA concentration**

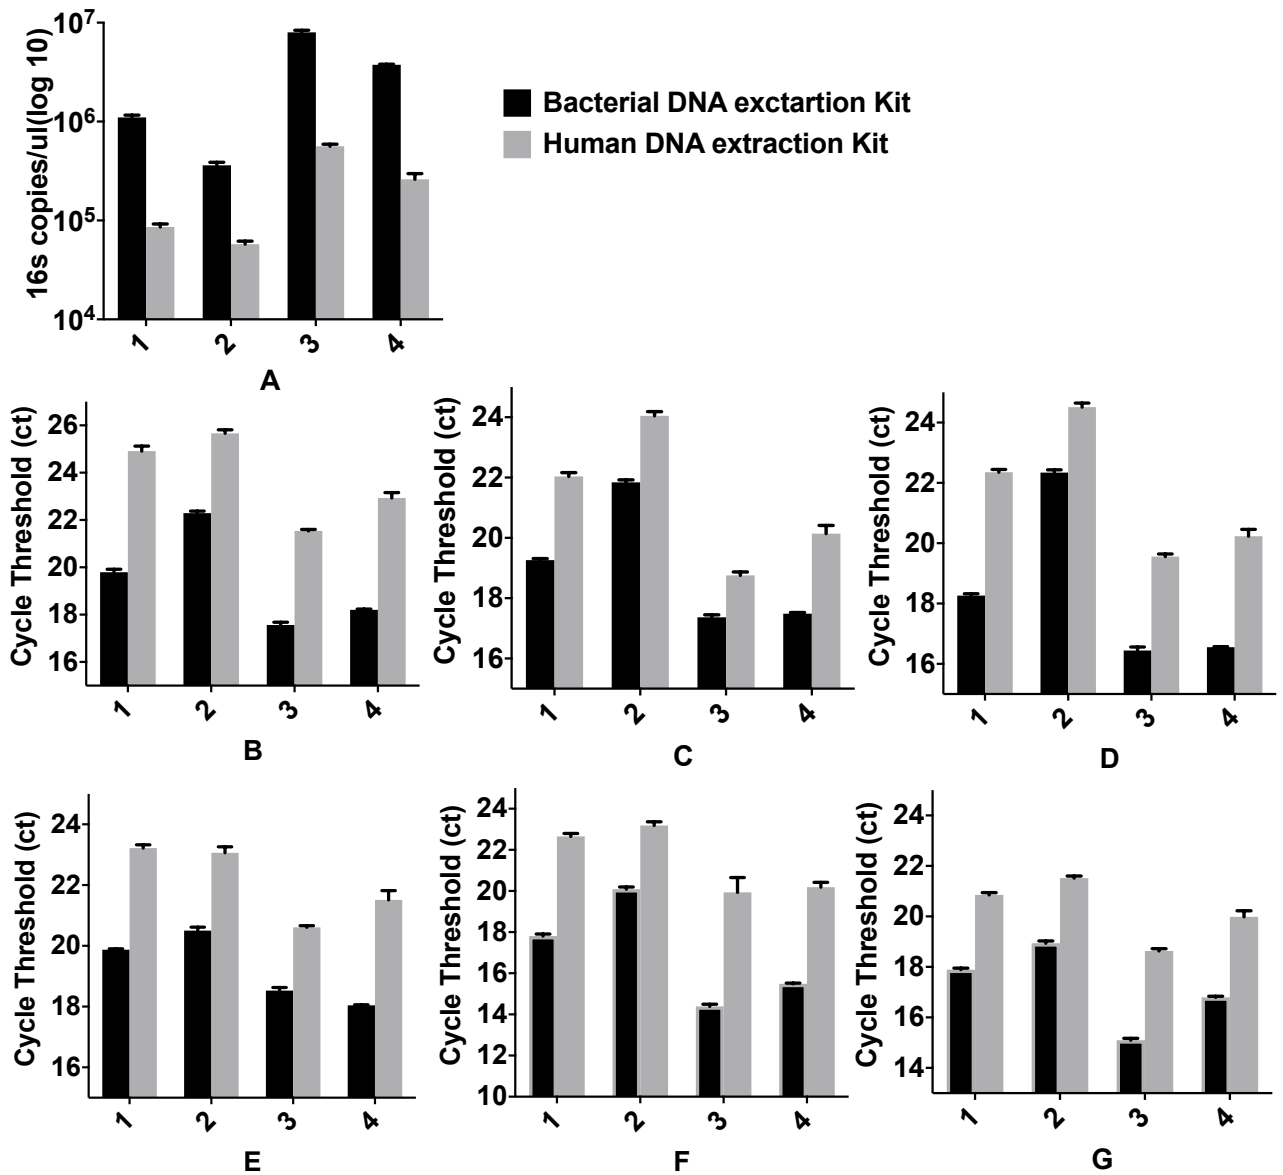

Supplement: inline-supplementary-material-5 [file inline-supplementary-material-5.pdf]
