# Supplementary material
Source: HighWire-hosted journal article supplement (https://thorax.bmj.com/content/thoraxjnl-2019-213485)
Supplement: inline-supplementary-material-7 [file inline-supplementary-material-7.pdf]

| Assay          | Sample | Ct | Tm    | Efficiency | flag                         |
|----------------|--------|----|-------|------------|------------------------------|
| 16S rRNA       | 1A     |    | 16.15 | 81.31      | 2.01                         |
| aac            | 1A     |    | 30.41 | 82.04      | 1.96 MultipleMeltPeaks       |
| aac(6')-Ib(akz | 1A     |    |       |            | CurveFitFailed               |
| aac(6')-Ib(akz | 1A     |    | 29.05 | 82.35      | 1.93                         |
| aac(6')-Ib(akz | 1A     |    | 40.23 | 79.51      | 1.69 MultipleMeltPeaks       |
| aac(6')-II     | 1A     |    | 32.62 | 83.96      | 1.76 MultipleMeltPeaks       |
| aac(6')I1      | 1A     |    |       |            | CurveFitFailed               |
| aacA/aphD      | 1A     |    |       |            | CurveFitFailed               |
| aacC           | 1A     |    | 30.21 | 88.47      | 1.78 MultipleMeltPeaks       |
| aacC1          | 1A     |    |       |            | NoAmplification              |
| aacC2          | 1A     |    |       |            | NoAmplification              |
| aacC4          | 1A     |    | 32.64 | 83.49      | 1.94 MultipleMeltPeaks       |
| aadA-01        | 1A     |    |       |            | NoAmplification              |
| aadA-02        | 1A     |    | 36.11 | 80.51      | 1.9                          |
| aadA-1-01      | 1A     |    | 35.32 | 85.57      | 1.84                         |
| aadA-1-02      | 1A     |    |       |            | CurveFitFailed               |
| aadA1          | 1A     |    | 34.23 | 83.23      | 1.92                         |
| aadA2-01       | 1A     |    |       |            | CurveFitFailed               |
| aadA2-02       | 1A     |    | 31.19 | 75.54      | 2.03                         |
| aadA2-03       | 1A     |    |       |            | LowEfficiency, CtIsSmall, Ci |
| aadA5-01       | 1A     |    | 38    | 81.13      | 1.7                          |
| aadA5-02       | 1A     |    | 30.21 | 83.64      | 1.98                         |
| aadA9-01       | 1A     |    | 32.47 | 88.99      | 1.8                          |
| aadA9-02       | 1A     |    | 36.6  | 73.31      | 1.9                          |
| aadD           | 1A     |    |       |            | NoAmplification              |
| aadE           | 1A     |    |       |            | LowEfficiency, CtIsSmall, S: |
| acrA-01        | 1A     |    | 28.94 | 88.82      | 1.92                         |
| acrA-02        | 1A     |    | 31.04 | 88.57      | 1.93                         |
| acrA-03        | 1A     |    | 40.04 | 66.38      | 1.71 MultipleMeltPeaks       |
| acrA-04        | 1A     |    | 28.6  | 88.32      | 1.98 MultipleMeltPeaks       |
| acrA-05        | 1A     |    | 28.4  | 88.98      | 1.97                         |
| acrB-01        | 1A     |    | 34.05 | 77.04      | 2                            |
| acrF           | 1A     |    | 25.65 | 82.89      | 1.85                         |
| acrR-01        | 1A     |    | 30.34 | 85.43      | 1.93                         |
| acrR-02        | 1A     |    | 32.39 | 84.99      | 1.88                         |
| Actin          | 1A     |    | 21.86 | 86.73      | 1.95                         |
| adeA           | 1A     |    | 31.2  | 85.91      | 1.94                         |
| ampC-01        | 1A     |    | 29.66 | 85.06      | 1.99                         |
| ampC-02        | 1A     |    | 38.9  | 76.18      | 1.86 MultipleMeltPeaks       |
| ampC-04        | 1A     |    | 30.87 | 85.97      | 1.91 MultipleMeltPeaks       |
| ampC-05        | 1A     |    |       |            | LowEfficiency, CtIsSmall, Ci |
| ampC-06        | 1A     |    | 30.58 | 73.35      | 1.92                         |
| ampC-07        | 1A     |    | 27.55 | 88.24      | 1.93                         |
| ampC-09        | 1A     |    |       |            | BadR2, LowEfficiency, CtIsS  |
| ampC/blaDH     | 1A     |    | 29.4  | 83.87      | 2                            |

|                          |    |       |       |      |                              |
|--------------------------|----|-------|-------|------|------------------------------|
| aph                      | 1A |       |       |      | LowEfficiency, CtIsSmall, S: |
| aph(2')-Id-01            | 1A |       |       |      | LowEfficiency, CtIsSmall, C: |
| aph(2')-Id-02            | 1A |       |       |      | LowEfficiency, CtIsSmall, C: |
| aph6ia                   | 1A | 31.92 | 79.43 | 1.93 |                              |
| aphA1(aka k <sub>z</sub> | 1A | 38    | 77.99 | 1.84 | MultipleMeltPeaks            |
| bacA-01                  | 1A | 37.6  | 84.76 | 1.91 | MultipleMeltPeaks            |
| bacA-02                  | 1A | 31.11 | 88.2  | 1.83 | MultipleMeltPeaks            |
| BETA-globin              | 1A | 23.12 | 84.07 | 1.98 |                              |
| bla-ACC-1                | 1A | 33.47 | 86.08 | 1.91 |                              |
| bla-L1                   | 1A | 30.26 | 85.72 | 1.96 | MultipleMeltPeaks            |
| bla1                     | 1A |       |       |      | LowEfficiency, CtIsSmall, C: |
| blaCMY                   | 1A | 36.02 | 86.05 | 1.81 | MultipleMeltPeaks            |
| blaCMY2-01               | 1A | 30.06 | 83.6  | 2.01 |                              |
| blaCMY2-02               | 1A | 28.29 | 89.66 | 1.98 | MultipleMeltPeaks            |
| blaCTX-M-01              | 1A | 33.93 | 86.02 | 1.89 |                              |
| blaCTX-M-02              | 1A | 28.75 | 85.24 | 1.92 |                              |
| blaCTX-M-03              | 1A |       |       |      | LowEfficiency, CtIsSmall, C: |
| blaCTX-M-04              | 1A | 30.35 | 87.14 | 1.95 |                              |
| blaCTX-M-05              | 1A | 32.66 | 84.47 | 1.73 |                              |
| blaCTX-M-06              | 1A |       |       |      | NoAmplification              |
| blaGES                   | 1A |       |       |      | LowEfficiency, CtIsSmall, S: |
| blaIMP-01                | 1A | 36.28 | 74.4  | 1.88 |                              |
| blaIMP-02                | 1A |       |       |      | LowEfficiency, CtIsSmall, C: |
| blaMOX/blaC              | 1A |       |       |      | CurveFitFailed               |
| blaOCH                   | 1A |       |       |      | NoAmplification              |
| blaOKP                   | 1A |       |       |      | NoAmplification              |
| blaOXA1/blaC             | 1A |       |       |      | LowEfficiency, CtIsSmall, S: |
| blaOXA10-01              | 1A | 38.57 | 77.51 | 1.75 | MultipleMeltPeaks            |
| blaOXA10-02              | 1A | 29.71 | 76.47 | 2.07 |                              |
| blaOXY                   | 1A | 29.75 | 88.67 | 1.69 | MultipleMeltPeaks            |
| blaPAO                   | 1A | 33.89 | 83.98 | 1.85 | MultipleMeltPeaks            |
| blaPER                   | 1A | 33.25 | 85.42 | 1.6  |                              |
| blaPSE                   | 1A | 38.28 | 86.62 | 1.75 | MultipleMeltPeaks            |
| blaROB                   | 1A | 42.43 | 82.41 | 1.53 | MultipleMeltPeaks            |
| blaSFO                   | 1A | 28.75 | 87.28 | 1.93 |                              |
| blaSHV-01                | 1A | 25.52 | 88.75 | 2.12 |                              |
| blaSHV-02                | 1A | 31.09 | 84.08 | 2    |                              |
| blaTEM                   | 1A | 18.93 | 79.49 | 2.09 |                              |
| blaTLA                   | 1A |       |       |      | CurveFitFailed               |
| blaVEB                   | 1A |       |       |      | NoAmplification              |
| blaVIM                   | 1A |       |       |      | NoAmplification              |
| blaZ                     | 1A |       |       |      | CurveFitFailed               |
| carB                     | 1A | 34.38 | 87.58 | 1.89 |                              |
| catA1                    | 1A |       |       |      | NoAmplification              |
| catB3                    | 1A |       |       |      | NoAmplification              |
| catB8                    | 1A | 26.76 | 82.07 | 1.94 | MultipleMeltPeaks            |

|            |    |       |       |      |                              |
|------------|----|-------|-------|------|------------------------------|
| ceoA       | 1A | 27.96 | 82.25 | 1.94 |                              |
| cepA       | 1A |       |       |      | NoAmplification              |
| cfiA       | 1A | 28.93 | 87.58 | 2.04 |                              |
| cfr        | 1A |       |       |      | LowEfficiency, CtIsSmall, S: |
| cfxA       | 1A | 24.06 | 77.73 | 2.09 |                              |
| cmeA       | 1A | 36.66 | 85.03 | 1.8  |                              |
| cmlA1-01   | 1A | 37.82 | 80.37 | 1.84 | MultipleMeltPeaks            |
| cmlA1-02   | 1A | 38.42 | 90.6  | 1.84 | MultipleMeltPeaks            |
| cmr        | 1A |       |       |      | CurveFitFailed               |
| cmx(A)     | 1A | 27.11 | 84.43 | 1.99 | MultipleMeltPeaks            |
| cphA-01    | 1A | 29.35 | 86.44 | 1.95 |                              |
| cphA-02    | 1A | 31.54 | 82.43 | 1.91 |                              |
| dfrA1      | 1A | 37.43 | 78.78 | 1.79 |                              |
| dfrA12     | 1A | 35.91 | 86.57 | 1.71 | MultipleMeltPeaks            |
| emrD       | 1A | 30.59 | 87.94 | 1.86 | MultipleMeltPeaks            |
| ereA       | 1A | 32.93 | 83.75 | 1.96 | MultipleMeltPeaks            |
| ereB       | 1A | 36.45 | 83.45 | 1.76 |                              |
| erm(34)    | 1A | 32.86 | 87.66 | 1.92 |                              |
| erm(35)    | 1A |       |       |      | NoAmplification              |
| erm(36)    | 1A | 32.51 | 90.3  | 2.31 | MultipleMeltPeaks            |
| ermA       | 1A |       |       |      | LowEfficiency, CtIsSmall, Ci |
| ermA/ermTR | 1A |       |       |      | NoAmplification              |
| ermB       | 1A | 23.28 | 75.1  | 2.08 |                              |
| ermC       | 1A | 33.84 | 81.96 | 2.02 |                              |
| ermF       | 1A | 27.64 | 74.72 | 2.02 |                              |
| ermJ/ermD  | 1A |       |       |      | LowEfficiency, CtIsSmall, Ci |
| ermK-01    | 1A |       |       |      | CurveFitFailed               |
| ermK-02    | 1A | 31.58 | 86.11 | 1.81 |                              |
| ermT-01    | 1A |       |       |      | LowEfficiency, CtIsSmall, Ci |
| ermT-02    | 1A | 38.12 | 76.01 | 1.83 | MultipleMeltPeaks            |
| ermX       | 1A | 25.42 | 83.66 | 1.94 |                              |
| ermY       | 1A |       |       |      | CurveFitFailed               |
| fabK       | 1A | 22.01 | 79.12 | 2.18 |                              |
| floR       | 1A | 32.57 | 78.84 | 2.01 | MultipleMeltPeaks            |
| folA       | 1A | 36.89 | 81.05 | 1.76 |                              |
| fosB       | 1A |       |       |      | LowEfficiency, CtIsSmall, S: |
| fosX       | 1A | 34.41 | 71.06 | 2.06 |                              |
| fox5       | 1A | 25.8  | 87.8  | 1.99 |                              |
| imiR       | 1A |       |       |      | CurveFitFailed               |
| ImrA-01    | 1A | 34.25 | 80.37 | 1.86 |                              |
| intl       | 1A | 27.56 | 84.66 | 1.97 | MultipleMeltPeaks            |
| intl1      | 1A | 19.97 | 87.23 | 2.02 |                              |
| IS613      | 1A | 26.43 | 79.45 | 2.13 |                              |
| lnuA-01    | 1A |       |       |      | LowEfficiency, CtIsSmall, S: |
| lnuB-01    | 1A |       |       |      | NoAmplification              |
| lnuB-02    | 1A |       |       |      | LowEfficiency, CtIsSmall, Ci |

|                |    |       |       |      |                              |
|----------------|----|-------|-------|------|------------------------------|
| lnuC           | 1A | 33.06 | 83.91 | 1.76 | MultipleMeltPeaks            |
| marR-01        | 1A | 33.68 | 85.56 | 1.91 |                              |
| matA/mel       | 1A | 20.76 | 77.81 | 2.06 |                              |
| mdet1          | 1A |       |       |      | NoAmplification              |
| mdtA           | 1A | 35.13 | 81.97 | 1.7  |                              |
| mdtE/yhiU      | 1A | 38.21 | 80.54 | 1.73 | MultipleMeltPeaks            |
| mecA           | 1A | 29.59 | 74.87 | 2.05 |                              |
| mefA           | 1A | 19.77 | 80.51 | 1.99 | MultipleMeltPeaks            |
| mepA           | 1A | 28.76 | 87.83 | 2    |                              |
| mexA           | 1A | 35.04 | 79.96 | 1.9  |                              |
| mexD           | 1A | 32.81 | 80.3  | 2    |                              |
| mexE           | 1A | 36.03 | 88.45 | 1.83 | MultipleMeltPeaks            |
| mexF           | 1A | 25.87 | 87.72 | 2.03 |                              |
| mphA-01        | 1A | 28.74 | 86.79 | 2    | MultipleMeltPeaks            |
| mphA-02        | 1A | 26.8  | 86.84 | 2.26 |                              |
| mphB           | 1A | 35.85 | 75.03 | 1.99 | MultipleMeltPeaks            |
| mphC           | 1A | 31.66 | 86    | 1.81 |                              |
| msrA-01        | 1A |       |       |      | CurveFitFailed               |
| msrC-01        | 1A |       |       |      | NoAmplification              |
| mtrC-01        | 1A | 33.04 | 83.23 | 1.94 |                              |
| mtrC-02        | 1A | 28.26 | 84.44 | 2.05 |                              |
| mtrD-02        | 1A | 25.79 | 85    | 2.05 |                              |
| mtrD-03        | 1A | 29.86 | 89.29 | 1.9  |                              |
| NDM1           | 1A |       |       |      | LowEfficiency, CtIsSmall, S: |
| nimE           | 1A | 31.55 | 75.94 | 1.85 | MultipleMeltPeaks            |
| nisB           | 1A | 35.93 | 82.76 | 1.88 |                              |
| oleC           | 1A | 33.44 | 89.01 | 1.88 |                              |
| oprD           | 1A | 27.14 | 86.38 | 1.97 | MultipleMeltPeaks            |
| oprJ           | 1A | 29.69 | 88.43 | 1.95 |                              |
| pbp            | 1A | 36.09 | 78.9  | 1.84 |                              |
| pbp2x          | 1A | 23.24 | 76.43 | 2.12 |                              |
| Pbp5           | 1A |       |       |      | CurveFitFailed               |
| penA           | 1A | 30.59 | 87.12 | 1.86 |                              |
| pikR1          | 1A | 34.47 | 81.48 | 1.9  |                              |
| pikR2          | 1A | 30.91 | 84.51 | 2.02 |                              |
| pmrA           | 1A | 22.28 | 79.81 | 2.09 |                              |
| pncA           | 1A | 32.45 | 88.95 | 1.94 |                              |
| putative multi | 1A | 31.57 | 84.4  | 1.97 |                              |
| qac            | 1A | 36.52 | 78.81 | 1.77 | MultipleMeltPeaks            |
| qacA           | 1A | 37.67 | 80.1  | 1.78 | MultipleMeltPeaks            |
| qacA/qacB      | 1A | 35.18 | 86.6  | 1.51 | MultipleMeltPeaks            |
| qacEdelta1-0   | 1A |       |       |      | LowEfficiency, CtIsSmall, Ci |
| qacEdelta1-0   | 1A | 29.24 | 83.44 | 2.02 | MultipleMeltPeaks            |
| qacH-01        | 1A | 31.03 | 86.61 | 1.97 | MultipleMeltPeaks            |
| qacH-02        | 1A | 33.64 | 86.26 | 1.7  | MultipleMeltPeaks            |
| qnrA           | 1A | 36.84 | 80.24 | 1.82 |                              |

|              |    |       |       |      |                             |
|--------------|----|-------|-------|------|-----------------------------|
| rarD-02      | 1A |       |       |      | NoAmplification             |
| sat4         | 1A |       |       |      | CurveFitFailed              |
| sdeB         | 1A |       |       |      | CurveFitFailed              |
| spcN-01      | 1A | 35.91 | 79.66 | 1.81 | MultipleMeltPeaks           |
| speA         | 1A |       |       |      | NoAmplification             |
| str          | 1A |       |       |      | CurveFitFailed              |
| strA         | 1A |       |       |      | LowEfficiency, CtIsSmall, S |
| strB         | 1A | 29.4  | 84.03 | 1.93 |                             |
| sul1         | 1A | 30.71 | 89.13 | 1.97 | MultipleMeltPeaks           |
| sul2         | 1A | 38.77 | 79.72 | 1.74 |                             |
| sulA/foIP-01 | 1A | 20.53 | 81.61 | 1.99 |                             |
| sulA/foIP-03 | 1A | 21.14 | 83.25 | 2.02 |                             |
| tet(32)      | 1A | 25.82 | 81.39 | 1.99 |                             |
| tet(34)      | 1A | 27.89 | 80.44 | 2.03 |                             |
| tet(35)      | 1A | 36.24 | 80.85 | 1.83 |                             |
| tet(36)-A    | 1A | 35.58 | 81.88 | 1.9  |                             |
| tet(36)-B    | 1A | 38.45 | 78.29 | 2.01 | MultipleMeltPeaks           |
| tet(37)      | 1A | 28.84 | 75.95 | 2    | MultipleMeltPeaks           |
| tetA-01      | 1A | 30.04 | 85.22 | 2.22 |                             |
| tetA-02      | 1A | 38.97 | 80.29 | 1.7  | MultipleMeltPeaks           |
| tetB-01      | 1A | 24.1  | 86.35 | 2.02 |                             |
| tetB-02      | 1A | 23.07 | 79.9  | 2.01 |                             |
| tetC-01      | 1A | 23.61 | 75.52 | 2.03 |                             |
| tetC-02      | 1A | 22.77 | 76.27 | 2.05 |                             |
| tetD-01      | 1A |       |       |      | CurveFitFailed              |
| tetD-02      | 1A | 32.72 | 77.29 | 2.08 |                             |
| tetE         | 1A |       |       |      | CurveFitFailed              |
| tetG-01      | 1A | 31.39 | 85.57 | 1.95 |                             |
| tetG-02      | 1A | 32.03 | 87.17 | 1.92 |                             |
| tetH         | 1A |       |       |      | NoAmplification             |
| tetJ         | 1A |       |       |      | CurveFitFailed              |
| tetK         | 1A | 30.28 | 72.45 | 1.98 |                             |
| tetL-01      | 1A | 36.25 | 82.43 | 1.82 | MultipleMeltPeaks           |
| tetL-02      | 1A | 32.66 | 85.31 | 1.8  |                             |
| tetM-01      | 1A | 20.56 | 76.3  | 2.03 |                             |
| tetM-02      | 1A | 21.46 | 77.88 | 2.01 |                             |
| tetO-01      | 1A |       |       |      | CurveFitFailed              |
| tetPA        | 1A |       |       |      | NoAmplification             |
| tetPB-01     | 1A |       |       |      | NoAmplification             |
| tetPB-02     | 1A | 26.61 | 84.94 | 2.04 |                             |
| tetPB-03     | 1A |       |       |      | BadR2, LowEfficiency, CtIsS |
| tetPB-05     | 1A |       |       |      | LowEfficiency, CtIsSmall, S |
| tetQ         | 1A | 26.31 | 75.82 | 2    |                             |
| tetR-02      | 1A | 30.34 | 88.96 | 1.9  | MultipleMeltPeaks           |
| tetR-03      | 1A | 23.2  | 76.23 | 1.97 |                             |
| tetS         | 1A |       |       |      | LowEfficiency, CtIsSmall, C |

|             |    |       |       |      |                              |
|-------------|----|-------|-------|------|------------------------------|
| tetT        | 1A |       |       |      | NoAmplification              |
| tetU-01     | 1A |       |       |      | NoAmplification              |
| tetV        | 1A |       |       |      | CurveFitFailed               |
| tetW-01     | 1A |       |       |      | CurveFitFailed               |
| tetX        | 1A |       |       |      | BadR2, LowEfficiency, CtIsS  |
| tnpA-01     | 1A | 42.34 | 79.58 | 2.54 | BadR2                        |
| tnpA-02     | 1A | 27.73 | 85.18 | 1.87 |                              |
| tnpA-03     | 1A | 30.72 | 77.96 | 2.08 |                              |
| tnpA-04     | 1A | 35.92 | 81.88 | 1.86 |                              |
| tnpA-05     | 1A | 33.28 | 82.71 | 1.85 | MultipleMeltPeaks            |
| tnpA-07     | 1A | 38.09 | 78.51 | 1.72 |                              |
| tolC-01     | 1A | 34.41 | 80.25 | 1.86 |                              |
| tolC-02     | 1A | 28.55 | 85.64 | 1.97 | MultipleMeltPeaks            |
| tolC-03     | 1A | 29.23 | 86.18 | 1.94 |                              |
| Tp614       | 1A | 29.87 | 83.59 | 1.91 |                              |
| ttgA        | 1A |       |       |      | CurveFitFailed               |
| ttgB        | 1A | 37.01 | 84.41 | 1.82 |                              |
| vanA        | 1A |       |       |      | NoAmplification              |
| vanB-01     | 1A | 30.2  | 84.43 | 2.01 |                              |
| vanC-01     | 1A |       |       |      | CurveFitFailed               |
| vanC-02     | 1A |       |       |      | CurveFitFailed               |
| vanC-03     | 1A | 24.54 | 85.22 | 1.99 |                              |
| vanC1       | 1A |       |       |      | LowEfficiency, CtIsSmall, C  |
| vanC2/vanC3 | 1A | 31.69 | 82.91 | 2.09 | MultipleMeltPeaks            |
| vanG        | 1A |       |       |      | CurveFitFailed               |
| vanHB       | 1A | 36.21 | 78.04 | 1.91 |                              |
| vanHD       | 1A | 34.24 | 82.93 | 1.91 | MultipleMeltPeaks            |
| vanRA-01    | 1A |       |       |      | CurveFitFailed               |
| vanRA-02    | 1A | 36.3  | 82.15 | 1.71 | MultipleMeltPeaks            |
| vanRB       | 1A | 31.36 | 87.63 | 1.92 |                              |
| vanRC       | 1A |       |       |      | NoAmplification              |
| vanRC4      | 1A |       |       |      | CurveFitFailed               |
| vanRD       | 1A |       |       |      | NoAmplification              |
| vanSA       | 1A |       |       |      | LowEfficiency, CtIsSmall, S: |
| vanSB       | 1A | 28.18 | 75.12 | 2.1  |                              |
| vanSC-01    | 1A | 32.63 | 84.29 | 2.01 |                              |
| vanSC-02    | 1A |       |       |      | NoAmplification              |
| vanTC-01    | 1A |       |       |      | CurveFitFailed               |
| vanTC-02    | 1A | 31.32 | 87.48 | 1.8  |                              |
| vanTE       | 1A | 39.13 | 78.25 | 1.68 | MultipleMeltPeaks            |
| vanTG       | 1A | 36.09 | 74.23 | 2.16 |                              |
| vanWB       | 1A |       |       |      | LowEfficiency, CtIsSmall, S: |
| vanWG       | 1A |       |       |      | CurveFitFailed               |
| vanXA       | 1A | 38.48 | 83.59 | 1.74 | MultipleMeltPeaks            |
| vanXB       | 1A |       |       |      | LowEfficiency, CtIsSmall, S: |
| vanXD       | 1A | 28.68 | 76.4  | 2.1  |                              |

|              |    |       |       |      |                              |
|--------------|----|-------|-------|------|------------------------------|
| vanYB        | 1A | 34.88 | 85.61 | 1.89 | MultipleMeltPeaks            |
| vanYD-01     | 1A | 30.19 | 89.47 | 1.86 |                              |
| vanYD-02     | 1A | 33.82 | 74.45 | 2.01 | MultipleMeltPeaks            |
| vatB-01      | 1A |       |       |      | CurveFitFailed               |
| vatB-02      | 1A | 37.85 | 78.34 | 1.81 |                              |
| vatC-01      | 1A |       |       |      | LowEfficiency, CtIsSmall, Ci |
| vatC-02      | 1A | 33.32 | 88.74 | 1.86 |                              |
| vatE-01      | 1A | 26.04 | 77.75 | 2.13 |                              |
| vatE-02      | 1A | 37.13 | 75.6  | 2    |                              |
| vgaA-01      | 1A |       |       |      | CurveFitFailed               |
| vgaA-02      | 1A | 35.54 | 81.02 | 1.84 |                              |
| vgb-01       | 1A | 32.52 | 87.26 | 1.9  |                              |
| vgbB-01      | 1A | 36.1  | 75.9  | 1.77 | MultipleMeltPeaks            |
| vgbB-02      | 1A | 34.24 | 73.07 | 2.04 |                              |
| yceE/mdtG-0  | 1A | 36.27 | 81.23 | 1.86 | MultipleMeltPeaks            |
| yceE/mdtG-0  | 1A | 30.17 | 81.05 | 2.01 |                              |
| yceL/mdtH-0  | 1A | 27.96 | 85.73 | 1.98 |                              |
| yceL/mdtH-0  | 1A |       |       |      | LowEfficiency, CtIsSmall, Ci |
| yceL/mdtH-0  | 1A | 29.82 | 81.3  | 1.95 |                              |
| yidY/mdtL-01 | 1A | 27.86 | 85.39 | 1.96 |                              |
| yidY/mdtL-02 | 1A | 37.43 | 78.8  | 1.76 | MultipleMeltPeaks            |































| Assay          | Sample | Ct    | Tm   | Efficiency | flag                             |
|----------------|--------|-------|------|------------|----------------------------------|
| 16S rRNA       | 1B     |       | 18.6 | 81.86      | 1.84 SaturationBaselineRatiolsL  |
| aac            | 1B     | 29.36 |      | 81.11      | 1.79 LowEfficiency, SaturationB: |
| aac(6')-Ib(akz | 1B     |       |      |            | LowEfficiency, CtIsSmall, S:     |
| aac(6')-Ib(akz | 1B     | 30.84 |      | 85.14      | 1.97 CtIsLarge, SaturationBaseli |
| aac(6')-Ib(akz | 1B     |       |      |            | LowEfficiency, CtIsSmall, S:     |
| aac(6')-II     | 1B     | 33.01 |      | 84.01      | 1.83 CtIsLarge, SaturationBaseli |
| aac(6')I1      | 1B     |       |      |            | LowEfficiency, CtIsSmall, C:     |
| aacA/aphD      | 1B     |       |      |            | LowEfficiency, CtIsSmall, S:     |
| aacC           | 1B     | 31.79 |      | 91.86      | 1.93 CtIsLarge, SaturationBaseli |
| aacC1          | 1B     |       |      |            | NoAmplification                  |
| aacC2          | 1B     |       |      |            | CurveFitFailed                   |
| aacC4          | 1B     | 34.86 |      | 83.56      | 1.87 CtIsLarge, SaturationBaseli |
| aadA-01        | 1B     |       |      |            | LowEfficiency, CtIsSmall, C:     |
| aadA-02        | 1B     |       |      |            | CurveFitFailed                   |
| aadA-1-01      | 1B     | 34    |      | 81.09      | 1.86 CtIsLarge, SaturationBaseli |
| aadA-1-02      | 1B     | 34.17 |      | 71.8       | 2.01 CtIsLarge, SaturationBaseli |
| aadA1          | 1B     | 29.91 |      | 84.47      | 2.05 CtIsLarge                   |
| aadA2-01       | 1B     |       |      |            | LowEfficiency, CtIsSmall, C:     |
| aadA2-02       | 1B     | 29.2  |      | 75.44      | 1.94 SaturationBaselineRatiolsL  |
| aadA2-03       | 1B     |       |      |            | CurveFitFailed                   |
| aadA5-01       | 1B     | 31.05 |      | 84.42      | 1.91 CtIsLarge, SaturationBaseli |
| aadA5-02       | 1B     | 31.81 |      | 86.85      | 1.96 CtIsLarge, SaturationBaseli |
| aadA9-01       | 1B     |       |      |            | NoAmplification                  |
| aadA9-02       | 1B     |       |      |            | CurveFitFailed                   |
| aadD           | 1B     |       |      |            | LowEfficiency, CtIsSmall, C:     |
| aadE           | 1B     |       |      |            | LowEfficiency, CtIsSmall, S:     |
| acrA-01        | 1B     | 30.31 |      | 88.47      | 1.91 CtIsLarge, SaturationBaseli |
| acrA-02        | 1B     |       |      |            | CurveFitFailed                   |
| acrA-03        | 1B     |       |      |            | CurveFitFailed                   |
| acrA-04        | 1B     | 29.15 |      | 80.6       | 1.92 SaturationBaselineRatiolsL  |
| acrA-05        | 1B     | 31.75 |      | 88.49      | 1.85 CtIsLarge, SaturationBaseli |
| acrB-01        | 1B     |       |      |            | LowEfficiency, CtIsSmall, C:     |
| acrF           | 1B     | 27.35 |      | 82.83      | 1.93 SaturationBaselineRatiolsL  |
| acrR-01        | 1B     |       |      |            | CtIsLarge, SaturationBaseli      |
| acrR-02        | 1B     | 31.89 |      | 85.02      | 1.89 CtIsLarge, SaturationBaseli |
| Actin          | 1B     | 20.1  |      | 86.84      | 2.05 SaturationBaselineRatiolsL  |
| adeA           | 1B     |       |      |            | BadR2, LowEfficiency, CtIsS      |
| ampC-01        | 1B     | 32.4  |      | 85.3       | 1.86 CtIsLarge, SaturationBaseli |
| ampC-02        | 1B     |       |      |            | CurveFitFailed                   |
| ampC-04        | 1B     | 31.45 |      | 79.46      | 1.7 LowEfficiency, CtIsLarge, S: |
| ampC-05        | 1B     |       |      |            | LowEfficiency, CtIsSmall, C:     |
| ampC-06        | 1B     |       |      |            | LowEfficiency, CtIsSmall, S:     |
| ampC-07        | 1B     | 33.95 |      | 80.16      | 1.87 CtIsLarge, SaturationBaseli |
| ampC-09        | 1B     |       |      |            | LowEfficiency, CtIsSmall, C:     |
| ampC/blaDH     | 1B     | 30.78 |      | 86.63      | 1.82 CtIsLarge, SaturationBaseli |

|                            |    |       |       |      |                              |
|----------------------------|----|-------|-------|------|------------------------------|
| aph                        | 1B |       |       |      | LowEfficiency, CtIsSmall, S: |
| aph(2')-Id-01              | 1B |       |       |      | LowEfficiency, CtIsSmall, C: |
| aph(2')-Id-02              | 1B |       |       |      | CurveFitFailed               |
| aph6ia                     | 1B |       |       |      | LowEfficiency, CtIsSmall, C: |
| aphA1(aka k <sub>z</sub> ) | 1B |       |       |      | LowEfficiency, CtIsSmall, S: |
| bacA-01                    | 1B |       |       |      | NoAmplification              |
| bacA-02                    | 1B | 32.56 | 88.04 | 1.78 | LowEfficiency, CtIsLarge, S: |
| BETA-globin                | 1B | 21.77 | 83.93 | 2.05 | SaturationBaselineRatiolsL   |
| bla-ACC-1                  | 1B | 34.2  | 85.94 | 1.84 | CtIsLarge, SaturationBaseli  |
| bla-L1                     | 1B | 30.96 | 84.07 | 1.9  | CtIsLarge, SaturationBaseli  |
| bla1                       | 1B |       |       |      | LowEfficiency, CtIsSmall, C: |
| blaCMY                     | 1B | 33.82 | 76    | 1.88 | CtIsLarge                    |
| blaCMY2-01                 | 1B | 31.96 | 83.51 | 2.03 | CtIsLarge                    |
| blaCMY2-02                 | 1B | 27.56 | 89.18 | 2.08 | MultipleMeltPeaks            |
| blaCTX-M-01                | 1B |       |       |      | LowEfficiency, CtIsSmall, C: |
| blaCTX-M-02                | 1B | 30.54 | 84.64 | 1.92 | CtIsLarge                    |
| blaCTX-M-03                | 1B |       |       |      | LowEfficiency, CtIsSmall, C: |
| blaCTX-M-04                | 1B | 33.5  | 82.91 | 1.85 | CtIsLarge, SaturationBaseli  |
| blaCTX-M-05                | 1B | 34.64 | 75.34 | 1.67 | LowEfficiency, CtIsLarge, S: |
| blaCTX-M-06                | 1B |       |       |      | NoAmplification              |
| blaGES                     | 1B |       |       |      | LowEfficiency, CtIsSmall, C: |
| blaIMP-01                  | 1B | 32.4  | 74.33 | 1.93 | CtIsLarge, SaturationBaseli  |
| blaIMP-02                  | 1B |       |       |      | LowEfficiency, CtIsSmall, C: |
| blaMOX/blaC                | 1B |       |       |      | CurveFitFailed               |
| blaOCH                     | 1B |       |       |      | NoAmplification              |
| blaOKP                     | 1B |       |       |      | NoAmplification              |
| blaOXA1/blaC               | 1B |       |       |      | LowEfficiency, CtIsSmall, S: |
| blaOXA10-01                | 1B |       |       |      | CurveFitFailed               |
| blaOXA10-02                | 1B |       |       |      | LowEfficiency, CtIsSmall, C: |
| blaOXY                     | 1B | 32.76 | 78.95 | 1.87 | CtIsLarge, MultipleMeltPea:  |
| blaPAO                     | 1B |       |       |      | LowEfficiency, CtIsSmall, C: |
| blaPER                     | 1B |       |       |      | LowEfficiency, CtIsSmall, S: |
| blaPSE                     | 1B |       |       |      | LowEfficiency, CtIsSmall, C: |
| blaROB                     | 1B |       |       |      | LowEfficiency, CtIsSmall, C: |
| blaSFO                     | 1B | 30.23 | 89.85 | 1.95 | CtIsLarge, SaturationBaseli  |
| blaSHV-01                  | 1B |       |       |      | CurveFitFailed               |
| blaSHV-02                  | 1B |       |       |      | CurveFitFailed               |
| blaTEM                     | 1B | 29.64 | 78.79 | 1.64 | LowEfficiency, CtIsLarge, S: |
| blaTLA                     | 1B |       |       |      | CurveFitFailed               |
| blaVEB                     | 1B |       |       |      | LowEfficiency, CtIsSmall, C: |
| blaVIM                     | 1B |       |       |      | LowEfficiency, CtIsSmall, C: |
| blaZ                       | 1B |       |       |      | LowEfficiency, CtIsSmall, C: |
| carB                       | 1B |       |       |      | LowEfficiency, CtIsSmall, C: |
| catA1                      | 1B |       |       |      | NoAmplification              |
| catB3                      | 1B |       |       |      | CurveFitFailed               |
| catB8                      | 1B | 29    | 83.37 | 2.03 | SaturationBaselineRatiolsL   |

|            |    |       |       |      |                              |
|------------|----|-------|-------|------|------------------------------|
| ceoA       | 1B | 30.26 | 82.1  | 1.95 | CtIsLarge, SaturationBaseli  |
| cepA       | 1B |       |       |      | LowEfficiency, CtIsSmall, S: |
| cfiA       | 1B | 31.04 | 85.94 | 1.85 | CtIsLarge, SaturationBaseli  |
| cfr        | 1B |       |       |      | LowEfficiency, CtIsSmall, S: |
| cfxA       | 1B | 27.75 | 77.25 | 2.1  |                              |
| cmeA       | 1B |       |       |      | LowEfficiency, CtIsSmall, S: |
| cmlA1-01   | 1B |       |       |      | LowEfficiency, CtIsSmall, S: |
| cmlA1-02   | 1B |       |       |      | LowEfficiency, CtIsSmall, C: |
| cmr        | 1B |       |       |      | CurveFitFailed               |
| cmx(A)     | 1B | 28.17 | 84.62 | 2.05 | SaturationBaselineRatiolsL   |
| cphA-01    | 1B | 32.56 | 85.36 | 1.96 | CtIsLarge, SaturationBaseli  |
| cphA-02    | 1B | 33.52 | 82.03 | 2.01 | CtIsLarge, SaturationBaseli  |
| dfrA1      | 1B | 32.58 | 79.32 | 1.95 | CtIsLarge                    |
| dfrA12     | 1B | 34.72 | 81.74 | 1.82 | CtIsLarge, MultipleMeltPec   |
| emrD       | 1B | 33.36 | 83.55 | 1.89 | CtIsLarge                    |
| ereA       | 1B |       |       |      | CurveFitFailed               |
| ereB       | 1B |       |       |      | CurveFitFailed               |
| erm(34)    | 1B |       |       |      | NoAmplification              |
| erm(35)    | 1B |       |       |      | LowEfficiency, CtIsSmall, C: |
| erm(36)    | 1B |       |       |      | LowEfficiency, CtIsSmall, S: |
| ermA       | 1B |       |       |      | CurveFitFailed               |
| ermA/ermTR | 1B |       |       |      | NoAmplification              |
| ermB       | 1B |       |       |      | LowEfficiency, CtIsSmall, C: |
| ermC       | 1B |       |       |      | CurveFitFailed               |
| ermF       | 1B |       |       |      | LowEfficiency, CtIsSmall, S: |
| ermJ/ermD  | 1B |       |       |      | CurveFitFailed               |
| ermK-01    | 1B |       |       |      | LowEfficiency, CtIsSmall, C: |
| ermK-02    | 1B |       |       |      | CurveFitFailed               |
| ermT-01    | 1B |       |       |      | LowEfficiency, CtIsSmall, S: |
| ermT-02    | 1B |       |       |      | CurveFitFailed               |
| ermX       | 1B | 34.71 | 83.44 | 1.75 | LowEfficiency, CtIsLarge, S: |
| ermY       | 1B |       |       |      | CurveFitFailed               |
| fabK       | 1B | 27.45 | 79.32 | 2.34 | SaturationBaselineRatiolsL   |
| floR       | 1B |       |       |      | LowEfficiency, CtIsSmall, C: |
| folA       | 1B |       |       |      | CurveFitFailed               |
| fosB       | 1B |       |       |      | LowEfficiency, CtIsSmall, S: |
| fosX       | 1B |       |       |      | CurveFitFailed               |
| fox5       | 1B | 26.41 | 86.09 | 2.06 |                              |
| imiR       | 1B |       |       |      | LowEfficiency, CtIsSmall, C: |
| ImrA-01    | 1B |       |       |      | CurveFitFailed               |
| intl       | 1B | 34.4  | 84.86 | 1.77 | LowEfficiency, CtIsLarge, S: |
| intl1      | 1B | 19.67 | 87.07 | 2.28 | SaturationBaselineRatiolsL   |
| IS613      | 1B | 31.61 | 79.12 | 1.74 | LowEfficiency, CtIsLarge, S: |
| lnuA-01    | 1B |       |       |      | LowEfficiency, CtIsSmall, C: |
| lnuB-01    | 1B |       |       |      | LowEfficiency, CtIsSmall, C: |
| lnuB-02    | 1B |       |       |      | LowEfficiency, CtIsSmall, C: |

|                |    |       |       |      |                              |
|----------------|----|-------|-------|------|------------------------------|
| lnuC           | 1B |       |       |      | LowEfficiency, CtIsSmall, Ci |
| marR-01        | 1B |       |       |      | CurveFitFailed               |
| matA/mel       | 1B | 25.3  | 77.04 | 2.02 | SaturationBaselineRatiolsL   |
| mdet1          | 1B |       |       |      | LowEfficiency, CtIsSmall, S; |
| mdtA           | 1B |       |       |      | CurveFitFailed               |
| mdtE/yhiU      | 1B |       |       |      | LowEfficiency, CtIsSmall, Ci |
| mecA           | 1B |       |       |      | LowEfficiency, CtIsSmall, Ci |
| mefA           | 1B | 25.49 | 80.34 | 1.93 | SaturationBaselineRatiolsL   |
| mepA           | 1B |       |       |      | CurveFitFailed               |
| mexA           | 1B |       |       |      | CurveFitFailed               |
| mexD           | 1B |       |       |      | CurveFitFailed               |
| mexE           | 1B |       |       |      | LowEfficiency, CtIsSmall, Ci |
| mexF           | 1B |       |       |      | CurveFitFailed               |
| mphA-01        | 1B |       |       |      | CurveFitFailed               |
| mphA-02        | 1B | 29.52 | 86.63 | 2.12 | CtIsLarge                    |
| mphB           | 1B |       |       |      | CurveFitFailed               |
| mphC           | 1B |       |       |      | LowEfficiency, CtIsLarge, Ci |
| msrA-01        | 1B |       |       |      | LowEfficiency, CtIsSmall, Ci |
| msrC-01        | 1B |       |       |      | NoAmplification              |
| mtrC-01        | 1B |       |       |      | CurveFitFailed               |
| mtrC-02        | 1B |       |       |      | CurveFitFailed               |
| mtrD-02        | 1B | 26.3  | 84.48 | 1.98 | SaturationBaselineRatiolsL   |
| mtrD-03        | 1B |       |       |      | CurveFitFailed               |
| NDM1           | 1B |       |       |      | BadR2, LowEfficiency, CtIsS  |
| nimE           | 1B |       |       |      | LowEfficiency, CtIsSmall, Ci |
| nisB           | 1B |       |       |      | CurveFitFailed               |
| oleC           | 1B |       |       |      | LowEfficiency, CtIsSmall, Ci |
| oprD           | 1B |       |       |      | CurveFitFailed               |
| oprJ           | 1B |       |       |      | LowEfficiency, CtIsSmall, Ci |
| pbp            | 1B |       |       |      | LowEfficiency, CtIsSmall, S; |
| pbp2x          | 1B |       |       |      | LowEfficiency, CtIsSmall, Ci |
| Pbp5           | 1B |       |       |      | LowEfficiency, CtIsSmall, S; |
| penA           | 1B |       |       |      | NoAmplification              |
| pikR1          | 1B |       |       |      | CtIsLarge, SaturationBaseli  |
| pikR2          | 1B |       |       |      | CurveFitFailed               |
| pmrA           | 1B | 27.79 | 79.49 | 2.12 |                              |
| pncA           | 1B | 34.77 | 79.91 | 1.87 | CtIsLarge, MultipleMeltPe;   |
| putative multi | 1B | 33.53 | 71.93 | 2    | CtIsLarge, MultipleMeltPe;   |
| qac            | 1B |       |       |      | LowEfficiency, CtIsLarge, Ci |
| qacA           | 1B |       |       |      | CurveFitFailed               |
| qacA/qacB      | 1B |       |       |      | CurveFitFailed               |
| qacEdelta1-0   | 1B |       |       |      | CurveFitFailed               |
| qacEdelta1-0   | 1B | 31.2  | 79.44 | 1.85 | CtIsLarge, SaturationBaseli  |
| qacH-01        | 1B | 34.08 | 82.1  | 1.99 | CtIsLarge, SaturationBaseli  |
| qacH-02        | 1B |       |       |      | LowEfficiency, CtIsSmall, S; |
| qnrA           | 1B |       |       |      | CtIsLarge, CurveFitFailed    |



|              |    |       |       |      |                                                            |
|--------------|----|-------|-------|------|------------------------------------------------------------|
| rarD-02      | 1B |       |       |      | CurveFitFailed                                             |
| sat4         | 1B |       |       |      | CurveFitFailed                                             |
| sdeB         | 1B |       |       |      | LowEfficiency, CtIsSmall, CtIsLarge                        |
| spcN-01      | 1B |       |       |      | BadR2, LowEfficiency, CtIsSmall, CtIsLarge                 |
| speA         | 1B |       |       |      | LowEfficiency, CtIsSmall, CtIsLarge                        |
| str          | 1B |       |       |      | LowEfficiency, CtIsSmall, CtIsLarge                        |
| strA         | 1B |       |       |      | LowEfficiency, CtIsSmall, CtIsLarge                        |
| strB         | 1B |       |       |      | CurveFitFailed                                             |
| sul1         | 1B | 33.73 | 89.06 | 1.74 | LowEfficiency, CtIsLarge, SaturationBaselineRatiosL        |
| sul2         | 1B |       |       |      | CurveFitFailed                                             |
| sulA/foIP-01 | 1B | 26.34 | 81.45 | 1.99 | SaturationBaselineRatiosL                                  |
| sulA/foIP-03 | 1B | 25.98 | 83.46 | 1.95 | SaturationBaselineRatiosL                                  |
| tet(32)      | 1B | 32.4  | 86.68 | 1.93 | CtIsLarge, SaturationBaselineRatiosL                       |
| tet(34)      | 1B | 31.63 | 75.28 | 1.87 | CtIsLarge, SaturationBaselineRatiosL                       |
| tet(35)      | 1B | 27.54 | 77.08 | 2.05 | SaturationBaselineRatiosL                                  |
| tet(36)-A    | 1B |       |       |      | NoAmplification                                            |
| tet(36)-B    | 1B |       |       |      | CurveFitFailed                                             |
| tet(37)      | 1B | 30.33 | 84.68 | 1.9  | CtIsLarge, SaturationBaselineRatiosL                       |
| tetA-01      | 1B |       |       |      | CurveFitFailed                                             |
| tetA-02      | 1B |       |       |      | CurveFitFailed                                             |
| tetB-01      | 1B | 27.82 | 85.87 | 1.99 |                                                            |
| tetB-02      | 1B |       |       |      | CurveFitFailed                                             |
| tetC-01      | 1B | 30.57 | 75.09 | 1.96 | CtIsLarge                                                  |
| tetC-02      | 1B | 27.28 | 75.68 | 2.18 | SaturationBaselineRatiosL                                  |
| tetD-01      | 1B |       |       |      | CurveFitFailed                                             |
| tetD-02      | 1B |       |       |      | CurveFitFailed                                             |
| tetE         | 1B |       |       |      | LowEfficiency, CtIsSmall, SaturationBaselineRatiosL        |
| tetG-01      | 1B |       |       |      | CurveFitFailed                                             |
| tetG-02      | 1B |       |       |      | LowEfficiency, CtIsSmall, SaturationBaselineRatiosL        |
| tetH         | 1B |       |       |      | LowEfficiency, CtIsSmall, SaturationBaselineRatiosL        |
| tetJ         | 1B |       |       |      | CurveFitFailed                                             |
| tetK         | 1B |       |       |      | CurveFitFailed                                             |
| tetL-01      | 1B |       |       |      | LowEfficiency, CtIsSmall, SaturationBaselineRatiosL        |
| tetL-02      | 1B |       |       |      | LowEfficiency, CtIsSmall, SaturationBaselineRatiosL        |
| tetM-01      | 1B |       |       |      | CurveFitFailed                                             |
| tetM-02      | 1B | 28.19 | 77.53 | 2.06 |                                                            |
| tetO-01      | 1B |       |       |      | CurveFitFailed                                             |
| tetPA        | 1B |       |       |      | CurveFitFailed                                             |
| tetPB-01     | 1B |       |       |      | CtIsLarge, CurveFitFailed                                  |
| tetPB-02     | 1B | 28.54 | 84.68 | 2.09 | SaturationBaselineRatiosL                                  |
| tetPB-03     | 1B |       |       |      | LowEfficiency, CtIsSmall, SaturationBaselineRatiosL        |
| tetPB-05     | 1B |       |       |      | BadR2, LowEfficiency, CtIsSmall, SaturationBaselineRatiosL |
| tetQ         | 1B | 30.1  | 75.55 | 2.04 | CtIsLarge, SaturationBaselineRatiosL                       |
| tetR-02      | 1B | 31.98 | 87.3  | 2.01 | CtIsLarge, SaturationBaselineRatiosL                       |
| tetR-03      | 1B | 26.45 | 75.74 | 1.98 | SaturationBaselineRatiosL                                  |
| tetS         | 1B |       |       |      | CurveFitFailed                                             |

|             |    |       |       |      |                              |
|-------------|----|-------|-------|------|------------------------------|
| tetT        | 1B |       |       |      | LowEfficiency, CtIsSmall, Ci |
| tetU-01     | 1B |       |       |      | LowEfficiency, CtIsSmall, Ci |
| tetV        | 1B |       |       |      | LowEfficiency, CtIsSmall, Ci |
| tetW-01     | 1B |       |       |      | CurveFitFailed               |
| tetX        | 1B |       |       |      | BadR2, LowEfficiency, CtIsS  |
| tnpA-01     | 1B |       |       |      | CurveFitFailed               |
| tnpA-02     | 1B |       |       |      | LowEfficiency, CtIsSmall, S: |
| tnpA-03     | 1B |       |       |      | CurveFitFailed               |
| tnpA-04     | 1B |       |       |      | CurveFitFailed               |
| tnpA-05     | 1B | 32.35 | 82.39 | 1.95 | CtIsLarge                    |
| tnpA-07     | 1B |       |       |      | LowEfficiency, CtIsSmall, S: |
| tolC-01     | 1B |       |       |      | CurveFitFailed               |
| tolC-02     | 1B | 33.77 | 83.48 | 1.94 | CtIsLarge, SaturationBaseli  |
| tolC-03     | 1B | 30.05 | 85.61 | 2.01 | CtIsLarge, SaturationBaseli  |
| Tp614       | 1B | 31.94 | 83.52 | 1.94 | CtIsLarge                    |
| ttgA        | 1B |       |       |      | LowEfficiency, CtIsSmall, Ci |
| ttgB        | 1B |       |       |      | CurveFitFailed               |
| vanA        | 1B |       |       |      | LowEfficiency, CtIsSmall, S: |
| vanB-01     | 1B | 30.72 | 83.76 | 2.11 | CtIsLarge                    |
| vanC-01     | 1B |       |       |      | LowEfficiency, CtIsSmall, Ci |
| vanC-02     | 1B |       |       |      | LowEfficiency, CtIsSmall, S: |
| vanC-03     | 1B | 27.33 | 88.65 | 2.1  | SaturationBaselineRatiolsL   |
| vanC1       | 1B |       |       |      | CtIsLarge, CurveFitFailed    |
| vanC2/vanC3 | 1B |       |       |      | CurveFitFailed               |
| vanG        | 1B |       |       |      | LowEfficiency, CtIsSmall, Ci |
| vanHB       | 1B |       |       |      | LowEfficiency, CtIsSmall, S: |
| vanHD       | 1B |       |       |      | CurveFitFailed               |
| vanRA-01    | 1B |       |       |      | LowEfficiency, CtIsSmall, Ci |
| vanRA-02    | 1B |       |       |      | NoAmplification              |
| vanRB       | 1B | 32.57 | 87.21 | 2.04 | CtIsLarge, SaturationBaseli  |
| vanRC       | 1B |       |       |      | LowEfficiency, CtIsSmall, Ci |
| vanRC4      | 1B |       |       |      | LowEfficiency, CtIsSmall, Ci |
| vanRD       | 1B |       |       |      | LowEfficiency, CtIsSmall, Ci |
| vanSA       | 1B |       |       |      | CurveFitFailed               |
| vanSB       | 1B | 27.78 | 74.52 | 2.08 |                              |
| vanSC-01    | 1B | 32.23 | 83.84 | 1.98 | CtIsLarge                    |
| vanSC-02    | 1B |       |       |      | NoAmplification              |
| vanTC-01    | 1B |       |       |      | CurveFitFailed               |
| vanTC-02    | 1B |       |       |      | LowEfficiency, CtIsSmall, S: |
| vanTE       | 1B |       |       |      | CurveFitFailed               |
| vanTG       | 1B | 31.14 | 74.86 | 2    | CtIsLarge, SaturationBaseli  |
| vanWB       | 1B |       |       |      | LowEfficiency, CtIsSmall, S: |
| vanWG       | 1B |       |       |      | CtIsLarge, CurveFitFailed    |
| vanXA       | 1B |       |       |      | CurveFitFailed               |
| vanXB       | 1B |       |       |      | LowEfficiency, CtIsSmall, S: |
| vanXD       | 1B | 29.51 | 75.21 | 2    | CtIsLarge, SaturationBaseli  |

|              |    |       |       |      |                             |
|--------------|----|-------|-------|------|-----------------------------|
| vanYB        | 1B |       |       |      | CurveFitFailed              |
| vanYD-01     | 1B | 31.58 | 81.17 | 1.89 | CtIsLarge, MultipleMeltPea  |
| vanYD-02     | 1B |       |       |      | LowEfficiency, CtIsSmall, S |
| vatB-01      | 1B |       |       |      | NoAmplification             |
| vatB-02      | 1B |       |       |      | CurveFitFailed              |
| vatC-01      | 1B |       |       |      | LowEfficiency, CtIsSmall, S |
| vatC-02      | 1B |       |       |      | BadR2, LowEfficiency, CtIsS |
| vatE-01      | 1B | 30.94 | 77.1  | 1.95 | CtIsLarge, SaturationBaseli |
| vatE-02      | 1B |       |       |      | CurveFitFailed              |
| vgaA-01      | 1B |       |       |      | LowEfficiency, CtIsSmall, C |
| vgaA-02      | 1B |       |       |      | CurveFitFailed              |
| vgb-01       | 1B |       |       |      | LowEfficiency, CtIsLarge, C |
| vgbB-01      | 1B |       |       |      | BadR2, LowEfficiency, CtIsS |
| vgbB-02      | 1B |       |       |      | CurveFitFailed              |
| yceE/mdtG-0  | 1B |       |       |      | CurveFitFailed              |
| yceE/mdtG-0  | 1B |       |       |      | LowEfficiency, CtIsLarge, C |
| yceL/mdtH-0  | 1B | 31.53 | 84.86 | 2.05 | CtIsLarge, SaturationBaseli |
| yceL/mdtH-0  | 1B |       |       |      | CurveFitFailed              |
| yceL/mdtH-0  | 1B | 32.23 | 81.71 | 1.95 | CtIsLarge, SaturationBaseli |
| yidY/mdtL-01 | 1B | 29.21 | 82.8  | 1.99 |                             |
| yidY/mdtL-02 | 1B |       |       |      | LowEfficiency, CtIsSmall, C |































| Assay          | Sample | Ct | Tm    | Efficiency | flag                             |
|----------------|--------|----|-------|------------|----------------------------------|
| 16S rRNA       | 1C     |    | 11.29 | 81.86      | 1.92 SaturationBaselineRatiolsL  |
| aac            | 1C     |    | 31.48 | 83.81      | 1.66 LowEfficiency, CtIsLarge, M |
| aac(6')-Ib(akz | 1C     |    | 33.4  | 80.46      | 1.92 CtIsLarge                   |
| aac(6')-Ib(akz | 1C     |    | 30.7  | 85.99      | 1.96 CtIsLarge                   |
| aac(6')-Ib(akz | 1C     |    | 32.18 | 78.02      | 2.01 CtIsLarge                   |
| aac(6')-II     | 1C     |    | 33.66 | 90.02      | 1.83 CtIsLarge, MultipleMeltPez  |
| aac(6')I1      | 1C     |    |       |            | LowEfficiency, CtIsLarge, C      |
| aacA/aphD      | 1C     |    |       |            | NoAmplification                  |
| aacC           | 1C     |    | 29.17 | 88.73      | 1.57 LowEfficiency, SaturationB: |
| aacC1          | 1C     |    |       |            | CtIsLarge, CurveFitFailed        |
| aacC2          | 1C     |    |       |            | NoAmplification                  |
| aacC4          | 1C     |    | 32.55 | 91.43      | 1.95 CtIsLarge, SaturationBaseli |
| aadA-01        | 1C     |    | 28.76 | 81.81      | 1.92                             |
| aadA-02        | 1C     |    | 32.95 | 80.4       | 1.95 CtIsLarge                   |
| aadA-1-01      | 1C     |    | 33.64 | 81.27      | 1.86 CtIsLarge                   |
| aadA-1-02      | 1C     |    |       |            | BadR2, LowEfficiency, CtIsS      |
| aadA1          | 1C     |    | 29.06 | 79.01      | 2.02 MultipleMeltPeaks           |
| aadA2-01       | 1C     |    | 34.58 | 76.77      | 1.89 CtIsLarge, MultipleMeltPez  |
| aadA2-02       | 1C     |    | 31.84 | 75.24      | 1.95 CtIsLarge, SaturationBaseli |
| aadA2-03       | 1C     |    | 29.87 | 80.21      | 1.96 CtIsLarge                   |
| aadA5-01       | 1C     |    | 33.82 | 88.34      | 1.86 CtIsLarge                   |
| aadA5-02       | 1C     |    | 34.39 | 83.44      | 1.89 CtIsLarge                   |
| aadA9-01       | 1C     |    | 34.95 | 92.01      | 1.88 CtIsLarge, SaturationBaseli |
| aadA9-02       | 1C     |    |       |            | CtIsLarge, SaturationBaseli      |
| aadD           | 1C     |    |       |            | NoAmplification                  |
| aadE           | 1C     |    |       |            | NoAmplification                  |
| acrA-01        | 1C     |    | 27.18 | 88.45      | 1.97 MultipleMeltPeaks           |
| acrA-02        | 1C     |    | 34.27 | 82.42      | 1.88 CtIsLarge                   |
| acrA-03        | 1C     |    | 33.48 | 89.71      | 1.86 CtIsLarge                   |
| acrA-04        | 1C     |    | 29.46 | 80.44      | 1.97 MultipleMeltPeaks           |
| acrA-05        | 1C     |    | 28.87 | 88.69      | 2.03 SaturationBaselineRatiolsL  |
| acrB-01        | 1C     |    |       |            | CtIsLarge, SaturationBaseli      |
| acrF           | 1C     |    | 27.98 | 84.18      | 1.79 LowEfficiency, SaturationB: |
| acrR-01        | 1C     |    | 30.64 | 91.73      | 2.03 CtIsLarge, MultipleMeltPez  |
| acrR-02        | 1C     |    |       |            | CtIsLarge, CurveFitFailed        |
| Actin          | 1C     |    | 19.68 | 86.85      | 1.97 SaturationBaselineRatiolsL  |
| adeA           | 1C     |    | 32.08 | 79.2       | 1.8 LowEfficiency, CtIsLarge, S: |
| ampC-01        | 1C     |    | 28.18 | 85.18      | 1.93 MultipleMeltPeaks           |
| ampC-02        | 1C     |    | 32.2  | 89.24      | 2.01 CtIsLarge, SaturationBaseli |
| ampC-04        | 1C     |    | 23.78 | 81.23      | 1.92                             |
| ampC-05        | 1C     |    |       |            | NoAmplification                  |
| ampC-06        | 1C     |    | 32.75 | 84.69      | 1.93 CtIsLarge, SaturationBaseli |
| ampC-07        | 1C     |    | 23.67 | 85.46      | 1.87                             |
| ampC-09        | 1C     |    | 34    | 87.63      | 1.86 CtIsLarge                   |
| ampC/blaDH     | 1C     |    | 31.45 | 76.8       | 1.96 CtIsLarge, MultipleMeltPez  |

|                          |    |       |       |                                  |
|--------------------------|----|-------|-------|----------------------------------|
| aph                      | 1C |       |       | NoAmplification                  |
| aph(2')-Id-01            | 1C |       |       | NoAmplification                  |
| aph(2')-Id-02            | 1C |       |       | NoAmplification                  |
| aph6ia                   | 1C | 32.07 | 81.93 | 1.96 CtIsLarge                   |
| aphA1(aka k <sub>z</sub> | 1C |       |       | NoAmplification                  |
| bacA-01                  | 1C | 32.97 | 83.58 | 1.89 CtIsLarge, SaturationBaseli |
| bacA-02                  | 1C | 33.27 | 88.25 | 1.76 LowEfficiency, CtIsLarge    |
| BETA-globin              | 1C | 23.07 | 83.91 | 2 MultipleMeltPeaks              |
| bla-ACC-1                | 1C |       |       | CtIsLarge, CurveFitFailed        |
| bla-L1                   | 1C | 34.63 | 85.99 | 1.9 CtIsLarge, SaturationBaseli  |
| bla1                     | 1C |       |       | NoAmplification                  |
| blaCMY                   | 1C | 33.59 | 79.66 | 1.9 CtIsLarge, MultipleMeltPea   |
| blaCMY2-01               | 1C | 27.45 | 83.3  | 2.05                             |
| blaCMY2-02               | 1C | 28.83 | 87.47 | 2.03                             |
| blaCTX-M-01              | 1C | 32.88 | 85.9  | 1.92 CtIsLarge                   |
| blaCTX-M-02              | 1C | 33.46 | 79.45 | 1.83 CtIsLarge, MultipleMeltPea  |
| blaCTX-M-03              | 1C |       |       | LowEfficiency, CtIsSmall, Ci     |
| blaCTX-M-04              | 1C | 30.14 | 86.48 | 1.74 LowEfficiency, CtIsLarge, M |
| blaCTX-M-05              | 1C | 30.6  | 76.61 | 1.83 CtIsLarge, SaturationBaseli |
| blaCTX-M-06              | 1C |       |       | NoAmplification                  |
| blaGES                   | 1C |       |       | NoAmplification                  |
| blaIMP-01                | 1C |       |       | NoAmplification                  |
| blaIMP-02                | 1C |       |       | NoAmplification                  |
| blaMOX/blaC              | 1C |       |       | LowEfficiency, CtIsLarge, Ci     |
| blaOCH                   | 1C |       |       | NoAmplification                  |
| blaOKP                   | 1C |       |       | NoAmplification                  |
| blaOXA1/blaC             | 1C |       |       | NoAmplification                  |
| blaOXA10-01              | 1C |       |       | CtIsLarge, CurveFitFailed        |
| blaOXA10-02              | 1C |       |       | CurveFitFailed                   |
| blaOXY                   | 1C | 29.49 | 90.06 | 1.9                              |
| blaPAO                   | 1C |       |       | BadR2, CtIsLarge, CurveFitf      |
| blaPER                   | 1C |       |       | CurveFitFailed                   |
| blaPSE                   | 1C |       |       | NoAmplification                  |
| blaROB                   | 1C | 33.2  | 79.44 | 1.93 CtIsLarge                   |
| blaSFO                   | 1C | 29.14 | 86.77 | 1.95 SaturationBaselineRatiolsL  |
| blaSHV-01                | 1C | 24.45 | 88.85 | 1.71 LowEfficiency, SaturationB: |
| blaSHV-02                | 1C |       |       | NoAmplification                  |
| blaTEM                   | 1C | 17.57 | 79.27 | 1.91 SaturationBaselineRatiolsL  |
| blaTLA                   | 1C |       |       | NoAmplification                  |
| blaVEB                   | 1C |       |       | NoAmplification                  |
| blaVIM                   | 1C |       |       | CtIsLarge, CurveFitFailed        |
| blaZ                     | 1C | 24.76 | 75.73 | 2.01                             |
| carB                     | 1C |       |       | NoAmplification                  |
| catA1                    | 1C |       |       | NoAmplification                  |
| catB3                    | 1C |       |       | LowEfficiency, CtIsSmall, S:     |
| catB8                    | 1C | 28.91 | 82.13 | 2.04 SaturationBaselineRatiolsL  |

|            |    |       |       |      |                              |
|------------|----|-------|-------|------|------------------------------|
| ceoA       | 1C | 29.06 | 91.96 | 2.02 | MultipleMeltPeaks            |
| cepA       | 1C |       |       |      | NoAmplification              |
| cfiA       | 1C | 30.87 | 86.73 | 1.92 | CtIsLarge, SaturationBaseli  |
| cfr        | 1C |       |       |      | LowEfficiency, CtIsSmall, Ci |
| cfxA       | 1C | 20.11 | 77.37 | 2.09 |                              |
| cmeA       | 1C |       |       |      | LowEfficiency, CtIsSmall, Ci |
| cmlA1-01   | 1C |       |       |      | LowEfficiency, CtIsLarge, Ci |
| cmlA1-02   | 1C | 34.46 | 87.37 | 1.85 | CtIsLarge                    |
| cmr        | 1C |       |       |      | LowEfficiency, CtIsSmall, Sæ |
| cmx(A)     | 1C | 26.26 | 85.16 | 1.96 |                              |
| cphA-01    | 1C | 32.91 | 87.33 | 1.94 | CtIsLarge                    |
| cphA-02    | 1C | 32.43 | 81.28 | 1.92 | CtIsLarge                    |
| dfrA1      | 1C |       |       |      | LowEfficiency, CtIsLarge, Ci |
| dfrA12     | 1C |       |       |      | LowEfficiency, CtIsLarge, Ci |
| emrD       | 1C | 29.26 | 83.69 | 1.91 | MultipleMeltPeaks            |
| ereA       | 1C |       |       |      | LowEfficiency, CtIsSmall, Ci |
| ereB       | 1C | 32.98 | 85.57 | 1.83 | CtIsLarge, SaturationBaseli  |
| erm(34)    | 1C |       |       |      | LowEfficiency, CtIsLarge, Ci |
| erm(35)    | 1C |       |       |      | NoAmplification              |
| erm(36)    | 1C | 31.44 | 85.81 | 1.94 | CtIsLarge, SaturationBaseli  |
| ermA       | 1C |       |       |      | NoAmplification              |
| ermA/ermTR | 1C | 30.45 | 75.73 | 1.99 | CtIsLarge                    |
| ermB       | 1C | 18.76 | 74.95 | 2.13 |                              |
| ermC       | 1C | 29.89 | 75.58 | 2.03 | CtIsLarge                    |
| ermF       | 1C | 23.76 | 74.42 | 2    |                              |
| ermJ/ermD  | 1C |       |       |      | LowEfficiency, CtIsLarge, Ci |
| ermK-01    | 1C |       |       |      | CurveFitFailed               |
| ermK-02    | 1C |       |       |      | LowEfficiency, CtIsLarge, Ci |
| ermT-01    | 1C |       |       |      | LowEfficiency, CtIsSmall, Ci |
| ermT-02    | 1C |       |       |      | CtIsLarge, CurveFitFailed    |
| ermX       | 1C | 21.94 | 83.45 | 1.95 |                              |
| ermY       | 1C |       |       |      | CurveFitFailed               |
| fabK       | 1C | 18.79 | 78.88 | 2.3  |                              |
| floR       | 1C |       |       |      | NoAmplification              |
| folA       | 1C |       |       |      | NoAmplification              |
| fosB       | 1C |       |       |      | LowEfficiency, CtIsSmall, Sæ |
| fosX       | 1C |       |       |      | NoAmplification              |
| fox5       | 1C | 26.89 | 87.18 | 1.98 | MultipleMeltPeaks            |
| imiR       | 1C |       |       |      | NoAmplification              |
| ImrA-01    | 1C |       |       |      | NoAmplification              |
| intl       | 1C | 34.33 | 79.7  | 1.81 | CtIsLarge, SaturationBaseli  |
| intl1      | 1C | 19.73 | 87.63 | 2.07 |                              |
| IS613      | 1C | 23.09 | 79.58 | 1.77 | LowEfficiency                |
| lnuA-01    | 1C |       |       |      | LowEfficiency, CtIsSmall, Sæ |
| lnuB-01    | 1C |       |       |      | LowEfficiency, CtIsSmall, Sæ |
| lnuB-02    | 1C | 30.22 | 73.76 | 2    | CtIsLarge, SaturationBaseli  |

|                |    |       |       |      |                              |
|----------------|----|-------|-------|------|------------------------------|
| lucC           | 1C | 34.28 | 87.66 | 1.9  | CtIsLarge                    |
| marR-01        | 1C | 33.93 | 86.37 | 1.92 | CtIsLarge                    |
| matA/mel       | 1C | 14.87 | 77.75 | 2.22 |                              |
| mdet1          | 1C |       |       |      | NoAmplification              |
| mdtA           | 1C | 34.33 | 87.92 | 1.78 | LowEfficiency, CtIsLarge, M  |
| mdtE/yhiU      | 1C | 34.35 | 87.87 | 1.84 | CtIsLarge                    |
| mecA           | 1C |       |       |      | NoAmplification              |
| mefA           | 1C | 14.48 | 80.61 | 2.09 | MultipleMeltPeaks            |
| mepA           | 1C | 31.21 | 89.42 | 1.91 | CtIsLarge, MultipleMeltPea   |
| mexA           | 1C |       |       |      | CtIsLarge, CurveFitFailed    |
| mexD           | 1C |       |       |      | CtIsLarge, CurveFitFailed    |
| mexE           | 1C | 29.53 | 87.34 | 1.88 | CtIsLarge, SaturationBaseli  |
| mexF           | 1C | 26.13 | 87.79 | 2.07 | SaturationBaselineRatiolsL   |
| mphA-01        | 1C | 28.74 | 86.66 | 2.02 |                              |
| mphA-02        | 1C | 28.16 | 87.53 | 2.07 |                              |
| mphB           | 1C |       |       |      | BadR2, LowEfficiency, CtIsS  |
| mphC           | 1C |       |       |      | BadR2, LowEfficiency, CtIsS  |
| msrA-01        | 1C |       |       |      | LowEfficiency, CtIsSmall, Ci |
| msrC-01        | 1C |       |       |      | NoAmplification              |
| mtrC-01        | 1C | 30.6  | 83.5  | 1.95 | CtIsLarge                    |
| mtrC-02        | 1C |       |       |      | LowEfficiency, CtIsLarge, S: |
| mtrD-02        | 1C | 27.51 | 87    | 1.91 | MultipleMeltPeaks            |
| mtrD-03        | 1C | 29.2  | 89.18 | 1.96 |                              |
| NDM1           | 1C |       |       |      | CurveFitFailed               |
| nimE           | 1C |       |       |      | CtIsLarge, CurveFitFailed    |
| nisB           | 1C |       |       |      | CtIsLarge, CurveFitFailed    |
| oleC           | 1C | 31.38 | 88.76 | 1.87 | CtIsLarge                    |
| oprD           | 1C | 27.61 | 86.4  | 2    | MultipleMeltPeaks            |
| oprJ           | 1C | 28.94 | 88.13 | 1.97 |                              |
| pbp            | 1C |       |       |      | NoAmplification              |
| pbp2x          | 1C | 18.67 | 76.37 | 1.99 | SaturationBaselineRatiolsL   |
| Pbp5           | 1C |       |       |      | NoAmplification              |
| penA           | 1C | 31.82 | 86.75 | 1.96 | CtIsLarge, SaturationBaseli  |
| pikR1          | 1C | 33.24 | 82.03 | 1.92 | CtIsLarge                    |
| pikR2          | 1C | 29.22 | 85.87 | 1.56 | LowEfficiency, SaturationB:  |
| pmrA           | 1C | 18.5  | 79.42 | 2.13 |                              |
| pncA           | 1C | 29.05 | 89.69 | 1.91 |                              |
| putative multi | 1C | 34.81 | 83.95 | 1.88 | CtIsLarge, MultipleMeltPea   |
| qac            | 1C |       |       |      | LowEfficiency, CtIsLarge, Ci |
| qacA           | 1C | 35    | 70.44 | 1.85 | CtIsLarge                    |
| qacA/qacB      | 1C |       |       |      | LowEfficiency, CtIsLarge, Ci |
| qacEdelta1-0   | 1C | 31.75 | 79.02 | 2    | CtIsLarge                    |
| qacEdelta1-0   | 1C | 28.63 | 77.84 | 2.05 | MultipleMeltPeaks            |
| qacH-01        | 1C | 32.1  | 87.75 | 1.93 | CtIsLarge                    |
| qacH-02        | 1C |       |       |      | LowEfficiency, CtIsSmall, S: |
| qnrA           | 1C |       |       |      | CtIsLarge, CurveFitFailed    |

|              |    |       |       |      |                             |
|--------------|----|-------|-------|------|-----------------------------|
| rarD-02      | 1C |       |       |      | CtIsLarge, SaturationBaseli |
| sat4         | 1C |       |       |      | LowEfficiency, CtIsSmall, S |
| sdeB         | 1C |       |       |      | NoAmplification             |
| spcN-01      | 1C |       |       |      | CtIsLarge, CurveFitFailed   |
| speA         | 1C |       |       |      | NoAmplification             |
| str          | 1C |       |       |      | LowEfficiency, CtIsSmall, C |
| strA         | 1C |       |       |      | LowEfficiency, CtIsSmall, C |
| strB         | 1C | 24.42 | 84.05 | 1.91 |                             |
| sul1         | 1C | 31.78 | 89.63 | 1.79 | LowEfficiency, CtIsLarge    |
| sul2         | 1C | 33.49 | 90.38 | 1.78 | LowEfficiency, CtIsLarge    |
| sulA/foIP-01 | 1C | 16.45 | 81.43 | 2.02 |                             |
| sulA/foIP-03 | 1C | 15.62 | 83.47 | 2.11 | SaturationBaselineRatiolsL  |
| tet(32)      | 1C | 20.93 | 81.5  | 1.99 |                             |
| tet(34)      | 1C | 33.16 | 75.11 | 1.88 | CtIsLarge, SaturationBaseli |
| tet(35)      | 1C | 28.34 | 77.26 | 2.03 | SaturationBaselineRatiolsL  |
| tet(36)-A    | 1C |       |       |      | CtIsLarge, CurveFitFailed   |
| tet(36)-B    | 1C | 35    | 81.13 | 1.74 | LowEfficiency, CtIsLarge    |
| tet(37)      | 1C | 23.57 | 83.1  | 2    |                             |
| tetA-01      | 1C |       |       |      | BadR2, SaturationBaselinel  |
| tetA-02      | 1C | 29.54 | 82.01 | 1.97 | CtIsLarge                   |
| tetB-01      | 1C | 19.52 | 79.56 | 1.99 | MultipleMeltPeaks           |
| tetB-02      | 1C | 19.51 | 79.66 | 2.01 |                             |
| tetC-01      | 1C | 20.27 | 75.56 | 2.04 |                             |
| tetC-02      | 1C | 19.06 | 76.13 | 2.09 |                             |
| tetD-01      | 1C |       |       |      | LowEfficiency, CtIsSmall, C |
| tetD-02      | 1C |       |       |      | CtIsLarge, CurveFitFailed   |
| tetE         | 1C |       |       |      | LowEfficiency, CtIsSmall, C |
| tetG-01      | 1C |       |       |      | LowEfficiency, CtIsSmall, C |
| tetG-02      | 1C |       |       |      | LowEfficiency, CtIsSmall, S |
| tetH         | 1C |       |       |      | CurveFitFailed              |
| tetJ         | 1C |       |       |      | NoAmplification             |
| tetK         | 1C |       |       |      | LowEfficiency, CtIsSmall, C |
| tetL-01      | 1C |       |       |      | LowEfficiency, CtIsSmall, S |
| tetL-02      | 1C |       |       |      | LowEfficiency, CtIsSmall, S |
| tetM-01      | 1C |       |       |      | LowEfficiency, CtIsSmall, S |
| tetM-02      | 1C | 17.28 | 77.31 | 2.04 |                             |
| tetO-01      | 1C | 26.19 | 76.66 | 2.02 |                             |
| tetPA        | 1C |       |       |      | NoAmplification             |
| tetPB-01     | 1C | 32.2  | 88.55 | 1.9  | CtIsLarge                   |
| tetPB-02     | 1C | 26.6  | 84.61 | 2.07 |                             |
| tetPB-03     | 1C |       |       |      | CurveFitFailed              |
| tetPB-05     | 1C |       |       |      | LowEfficiency, CtIsSmall, S |
| tetQ         | 1C | 21    | 75.96 | 2.12 | SaturationBaselineRatiolsL  |
| tetR-02      | 1C | 27.53 | 86.18 | 1.97 | MultipleMeltPeaks           |
| tetR-03      | 1C | 17.87 | 76.22 | 2.03 |                             |
| tetS         | 1C | 33.14 | 87.96 | 2.21 | CtIsLarge, SaturationBaseli |

|             |    |       |       |      |                             |
|-------------|----|-------|-------|------|-----------------------------|
| tetT        | 1C |       |       |      | CtIsLarge, CurveFitFailed   |
| tetU-01     | 1C |       |       |      | NoAmplification             |
| tetV        | 1C |       |       |      | NoAmplification             |
| tetW-01     | 1C | 28.1  | 81.34 | 2.01 |                             |
| tetX        | 1C |       |       |      | CurveFitFailed              |
| tnpA-01     | 1C |       |       |      | LowEfficiency, CtIsLarge, C |
| tnpA-02     | 1C | 25.97 | 84.76 | 1.79 | LowEfficiency               |
| tnpA-03     | 1C | 26.65 | 77.96 | 2.1  |                             |
| tnpA-04     | 1C | 28.6  | 82.21 | 1.94 |                             |
| tnpA-05     | 1C |       |       |      | LowEfficiency, CtIsLarge, C |
| tnpA-07     | 1C |       |       |      | NoAmplification             |
| tolC-01     | 1C |       |       |      | NoAmplification             |
| tolC-02     | 1C | 31.02 | 87.65 | 1.98 | CtIsLarge, MultipleMeltPea  |
| tolC-03     | 1C | 30.41 | 85.02 | 1.99 | CtIsLarge                   |
| Tp614       | 1C | 33.31 | 72.78 | 1.95 | CtIsLarge, MultipleMeltPea  |
| ttgA        | 1C |       |       |      | CtIsLarge, CurveFitFailed   |
| ttgB        | 1C | 29.81 | 83.5  | 1.95 | CtIsLarge                   |
| vanA        | 1C |       |       |      | NoAmplification             |
| vanB-01     | 1C | 31.52 | 83.85 | 1.96 | CtIsLarge, MultipleMeltPea  |
| vanC-01     | 1C |       |       |      | NoAmplification             |
| vanC-02     | 1C |       |       |      | CurveFitFailed              |
| vanC-03     | 1C | 21.62 | 85.64 | 2    | MultipleMeltPeaks           |
| vanC1       | 1C |       |       |      | CurveFitFailed              |
| vanC2/vanC3 | 1C | 31.45 | 83.42 | 1.88 | CtIsLarge, MultipleMeltPea  |
| vanG        | 1C |       |       |      | LowEfficiency, CtIsSmall, C |
| vanHB       | 1C | 33.2  | 84.09 | 1.95 | CtIsLarge, SaturationBaseli |
| vanHD       | 1C | 29.88 | 89.89 | 1.91 | CtIsLarge, SaturationBaseli |
| vanRA-01    | 1C |       |       |      | NoAmplification             |
| vanRA-02    | 1C |       |       |      | NoAmplification             |
| vanRB       | 1C | 29.65 | 81.65 | 2.23 | CtIsLarge, SaturationBaseli |
| vanRC       | 1C |       |       |      | LowEfficiency, CtIsSmall, C |
| vanRC4      | 1C |       |       |      | LowEfficiency, CtIsSmall, C |
| vanRD       | 1C |       |       |      | NoAmplification             |
| vanSA       | 1C |       |       |      | LowEfficiency, CtIsSmall, S |
| vanSB       | 1C | 28.5  | 74.77 | 2.06 |                             |
| vanSC-01    | 1C | 33.07 | 77.09 | 1.96 | CtIsLarge, MultipleMeltPea  |
| vanSC-02    | 1C |       |       |      | NoAmplification             |
| vanTC-01    | 1C |       |       |      | LowEfficiency, CtIsSmall, C |
| vanTC-02    | 1C | 29.69 | 86.7  | 1.79 | LowEfficiency, CtIsLarge    |
| vanTE       | 1C |       |       |      | LowEfficiency, CtIsLarge, C |
| vanTG       | 1C |       |       |      | NoAmplification             |
| vanWB       | 1C |       |       |      | NoAmplification             |
| vanWG       | 1C |       |       |      | LowEfficiency, CtIsLarge, C |
| vanXA       | 1C |       |       |      | CurveFitFailed              |
| vanXB       | 1C |       |       |      | NoAmplification             |
| vanXD       | 1C | 29.78 | 75.52 | 2    | CtIsLarge                   |

|              |    |       |       |      |                             |
|--------------|----|-------|-------|------|-----------------------------|
| vanYB        | 1C |       |       |      | CtIsLarge, CurveFitFailed   |
| vanYD-01     | 1C | 30.94 | 88.29 | 1.72 | LowEfficiency, CtIsLarge    |
| vanYD-02     | 1C |       |       |      | CurveFitFailed              |
| vatB-01      | 1C |       |       |      | NoAmplification             |
| vatB-02      | 1C |       |       |      | BadR2, LowEfficiency, CtIsS |
| vatC-01      | 1C | 32.51 | 83.5  | 1.81 | CtIsLarge, SaturationBaseli |
| vatC-02      | 1C | 32.89 | 86.22 | 1.92 | CtIsLarge                   |
| vatE-01      | 1C | 28.99 | 77.31 | 2.13 |                             |
| vatE-02      | 1C |       |       |      | NoAmplification             |
| vgaA-01      | 1C |       |       |      | CurveFitFailed              |
| vgaA-02      | 1C |       |       |      | LowEfficiency, CtIsSmall, S |
| vgb-01       | 1C | 34.53 | 84.07 | 1.87 | CtIsLarge, MultipleMeltPe   |
| vgbB-01      | 1C |       |       |      | LowEfficiency, CtIsLarge, C |
| vgbB-02      | 1C |       |       |      | NoAmplification             |
| yceE/mdtG-0  | 1C |       |       |      | CurveFitFailed              |
| yceE/mdtG-0  | 1C |       |       |      | CtIsLarge, CurveFitFailed   |
| yceL/mdtH-0  | 1C | 31.88 | 84.76 | 1.93 | CtIsLarge                   |
| yceL/mdtH-0  | 1C |       |       |      | NoAmplification             |
| yceL/mdtH-0  | 1C | 30.21 | 80.98 | 1.92 | CtIsLarge                   |
| yidY/mdtL-01 | 1C | 30.5  | 82.36 | 1.97 | CtIsLarge, MultipleMeltPe   |
| yidY/mdtL-02 | 1C |       |       |      | LowEfficiency, CtIsLarge, C |































| Assay          | Sample | Ct    | Tm    | Efficiency | flag                   |
|----------------|--------|-------|-------|------------|------------------------|
| 16S rRNA       | 2A     |       | 17.48 | 81.79      | 2.05                   |
| aac            | 2A     |       | 28.14 | 85.98      | 1.78 MultipleMeltPeaks |
| aac(6')-Ib(akε | 2A     |       |       |            | NoAmplification        |
| aac(6')-Ib(akε | 2A     | 29.39 | 87.09 | 2          |                        |
| aac(6')-Ib(akε | 2A     | 30.69 | 90.41 | 2          |                        |
| aac(6')-II     | 2A     | 32.43 | 81.09 | 1.66       | MultipleMeltPeaks      |
| aac(6')I1      | 2A     | 35.61 | 88.61 | 1.8        |                        |
| aacA/aphD      | 2A     |       |       |            | NoAmplification        |
| aacC           | 2A     | 30.73 | 92.1  | 1.85       |                        |
| aacC1          | 2A     | 36.13 | 92.26 | 1.82       | MultipleMeltPeaks      |
| aacC2          | 2A     |       |       |            | NoAmplification        |
| aacC4          | 2A     | 32.08 | 83.68 | 1.85       | MultipleMeltPeaks      |
| aadA-01        | 2A     | 33.32 | 82.42 | 1.95       |                        |
| aadA-02        | 2A     |       |       |            | NoAmplification        |
| aadA-1-01      | 2A     | 32.55 | 86.42 | 1.87       |                        |
| aadA-1-02      | 2A     |       |       |            | NoAmplification        |
| aadA1          | 2A     | 28.01 | 82.77 | 2.03       | MultipleMeltPeaks      |
| aadA2-01       | 2A     | 29.38 | 80.9  | 1.82       |                        |
| aadA2-02       | 2A     | 29.81 | 75.24 | 2.01       | MultipleMeltPeaks      |
| aadA2-03       | 2A     |       |       |            | NoAmplification        |
| aadA5-01       | 2A     | 32.06 | 78.38 | 1.87       | MultipleMeltPeaks      |
| aadA5-02       | 2A     | 29.55 | 88.32 | 2.02       | MultipleMeltPeaks      |
| aadA9-01       | 2A     | 34.35 | 87.82 | 1.83       | MultipleMeltPeaks      |
| aadA9-02       | 2A     | 36.88 | 87.45 | 1.86       | MultipleMeltPeaks      |
| aadD           | 2A     |       |       |            | NoAmplification        |
| aadE           | 2A     |       |       |            | NoAmplification        |
| acrA-01        | 2A     | 27.47 | 88.9  | 1.95       |                        |
| acrA-02        | 2A     | 33.82 | 87.12 | 1.9        | MultipleMeltPeaks      |
| acrA-03        | 2A     | 33.57 | 85.03 | 1.9        | MultipleMeltPeaks      |
| acrA-04        | 2A     | 28.04 | 81.51 | 1.96       |                        |
| acrA-05        | 2A     | 29.55 | 88.59 | 1.94       |                        |
| acrB-01        | 2A     |       |       |            | NoAmplification        |
| acrF           | 2A     | 27.96 | 84.68 | 1.99       |                        |
| acrR-01        | 2A     | 30.64 | 84.84 | 1.93       | MultipleMeltPeaks      |
| acrR-02        | 2A     | 30.19 | 87.04 | 1.99       |                        |
| Actin          | 2A     | 19.68 | 86.82 | 1.97       | MultipleMeltPeaks      |
| adeA           | 2A     | 32.35 | 88.06 | 1.94       | MultipleMeltPeaks      |
| ampC-01        | 2A     | 30.66 | 88.64 | 2.04       | MultipleMeltPeaks      |
| ampC-02        | 2A     | 36.52 | 82.33 | 1.89       | MultipleMeltPeaks      |
| ampC-04        | 2A     | 29.72 | 86.48 | 1.78       |                        |
| ampC-05        | 2A     |       |       |            | NoAmplification        |
| ampC-06        | 2A     | 31.13 | 84.07 | 1.71       |                        |
| ampC-07        | 2A     | 30.72 | 90.76 | 1.91       | MultipleMeltPeaks      |
| ampC-09        | 2A     |       |       |            | NoAmplification        |
| ampC/blaDH     | 2A     | 28    | 87.46 | 1.99       |                        |

|                          |    |       |       |      |                   |
|--------------------------|----|-------|-------|------|-------------------|
| aph                      | 2A |       |       |      | NoAmplification   |
| aph(2')-Id-01            | 2A |       |       |      | NoAmplification   |
| aph(2')-Id-02            | 2A |       |       |      | NoAmplification   |
| aph6ia                   | 2A | 37.48 | 78.79 | 1.89 | MultipleMeltPeaks |
| aphA1(aka k <sub>ε</sub> | 2A |       |       |      | NoAmplification   |
| bacA-01                  | 2A | 33.16 | 74.39 | 1.87 | MultipleMeltPeaks |
| bacA-02                  | 2A | 30.51 | 88.44 | 1.86 |                   |
| BETA-globin              | 2A | 20.64 | 84.08 | 1.99 |                   |
| bla-ACC-1                | 2A | 32.88 | 89.79 | 1.93 |                   |
| bla-L1                   | 2A | 28.08 | 85.55 | 2.01 |                   |
| bla1                     | 2A |       |       |      | NoAmplification   |
| blaCMY                   | 2A | 32.35 | 76.3  | 1.89 | MultipleMeltPeaks |
| blaCMY2-01               | 2A | 31.92 | 85.6  | 1.7  | MultipleMeltPeaks |
| blaCMY2-02               | 2A | 26.55 | 89.37 | 2.02 | MultipleMeltPeaks |
| blaCTX-M-01              | 2A | 28.73 | 84.28 | 2.03 |                   |
| blaCTX-M-02              | 2A | 30.96 | 81.26 | 1.91 | MultipleMeltPeaks |
| blaCTX-M-03              | 2A |       |       |      | NoAmplification   |
| blaCTX-M-04              | 2A | 33.23 | 87.9  | 1.87 | MultipleMeltPeaks |
| blaCTX-M-05              | 2A | 35.36 | 75.66 | 1.69 | MultipleMeltPeaks |
| blaCTX-M-06              | 2A | 35.65 | 83.89 | 1.93 | MultipleMeltPeaks |
| blaGES                   | 2A |       |       |      | NoAmplification   |
| blaIMP-01                | 2A | 37.13 | 74.09 | 2.1  |                   |
| blaIMP-02                | 2A | 34.04 | 80.86 | 1.91 |                   |
| blaMOX/blaC              | 2A | 33.21 | 88.22 | 1.89 |                   |
| blaOCH                   | 2A |       |       |      | NoAmplification   |
| blaOKP                   | 2A |       |       |      | NoAmplification   |
| blaOXA1/blaC             | 2A |       |       |      | NoAmplification   |
| blaOXA10-01              | 2A |       |       |      | NoAmplification   |
| blaOXA10-02              | 2A |       |       |      | NoAmplification   |
| blaOXY                   | 2A | 31.57 | 88.66 | 1.82 |                   |
| blaPAO                   | 2A | 33    | 81.05 | 1.91 |                   |
| blaPER                   | 2A | 33.68 | 77.75 | 2    |                   |
| blaPSE                   | 2A |       |       |      | NoAmplification   |
| blaROB                   | 2A |       |       |      | NoAmplification   |
| blaSFO                   | 2A | 27.25 | 86.92 | 1.97 | MultipleMeltPeaks |
| blaSHV-01                | 2A | 25.84 | 85.2  | 1.41 | MultipleMeltPeaks |
| blaSHV-02                | 2A | 30.16 | 84.39 | 2.02 |                   |
| blaTEM                   | 2A | 26.73 | 79.24 | 2.01 |                   |
| blaTLA                   | 2A |       |       |      | NoAmplification   |
| blaVEB                   | 2A |       |       |      | NoAmplification   |
| blaVIM                   | 2A |       |       |      | NoAmplification   |
| blaZ                     | 2A |       |       |      | NoAmplification   |
| carB                     | 2A | 37.32 | 79.6  | 1.94 | MultipleMeltPeaks |
| catA1                    | 2A |       |       |      | NoAmplification   |
| catB3                    | 2A | 33.51 | 79.95 | 2.01 | MultipleMeltPeaks |
| catB8                    | 2A | 26.45 | 84.42 | 1.95 | MultipleMeltPeaks |

|            |    |       |       |      |                              |
|------------|----|-------|-------|------|------------------------------|
| ceoA       | 2A | 26.71 | 82.15 | 2    | MultipleMeltPeaks            |
| cepA       | 2A | 36.47 | 89.45 | 1.77 | MultipleMeltPeaks            |
| cfiA       | 2A |       |       |      | NoAmplification              |
| cfr        | 2A | 33.31 | 76.14 | 1.94 |                              |
| cfxA       | 2A | 25.8  | 77.62 | 1.98 |                              |
| cmeA       | 2A | 36.42 | 82.37 | 1.9  |                              |
| cmlA1-01   | 2A | 34.02 | 85    | 1.94 |                              |
| cmlA1-02   | 2A |       |       |      | NoAmplification              |
| cmr        | 2A | 31.17 | 78.69 | 1.88 |                              |
| cmx(A)     | 2A | 25.89 | 84.65 | 2.05 | MultipleMeltPeaks            |
| cphA-01    | 2A | 29.66 | 85.62 | 1.97 | MultipleMeltPeaks            |
| cphA-02    | 2A | 31.65 | 82.51 | 1.94 |                              |
| dfrA1      | 2A | 31.1  | 88.39 | 1.96 | MultipleMeltPeaks            |
| dfrA12     | 2A | 29.23 | 82.31 | 1.93 |                              |
| emrD       | 2A | 33.26 | 87.78 | 1.86 |                              |
| ereA       | 2A | 33.65 | 83.31 | 1.98 |                              |
| ereB       | 2A | 31.83 | 86.36 | 2.13 |                              |
| erm(34)    | 2A |       |       |      | NoAmplification              |
| erm(35)    | 2A |       |       |      | NoAmplification              |
| erm(36)    | 2A | 29.67 | 85.62 | 2.17 |                              |
| ermA       | 2A |       |       |      | NoAmplification              |
| ermA/ermTR | 2A | 29.47 | 75.64 | 1.96 |                              |
| ermB       | 2A | 23.08 | 74.93 | 2.12 |                              |
| ermC       | 2A | 35.49 | 85.47 | 1.97 |                              |
| ermF       | 2A | 25.1  | 74.74 | 2.02 |                              |
| ermJ/ermD  | 2A |       |       |      | NoAmplification              |
| ermK-01    | 2A | 30.52 | 75.46 | 1.98 |                              |
| ermK-02    | 2A | 30.09 | 85.75 | 1.81 | MultipleMeltPeaks            |
| ermT-01    | 2A |       |       |      | NoAmplification              |
| ermT-02    | 2A | 34.9  | 79.61 | 2.01 |                              |
| ermX       | 2A | 23    | 83.66 | 1.91 |                              |
| ermY       | 2A |       |       |      | NoAmplification              |
| fabK       | 2A | 20.31 | 78.49 | 2.27 |                              |
| floR       | 2A | 34.66 | 83.57 | 1.9  |                              |
| folA       | 2A | 33.94 | 81.71 | 1.9  |                              |
| fosB       | 2A |       |       |      | LowEfficiency, CtIsSmall, S: |
| fosX       | 2A |       |       |      | NoAmplification              |
| fox5       | 2A | 25.34 | 87.96 | 1.96 |                              |
| imiR       | 2A |       |       |      | NoAmplification              |
| ImrA-01    | 2A | 34.88 | 82.25 | 1.97 | MultipleMeltPeaks            |
| intl       | 2A | 25.6  | 84.68 | 2.04 | MultipleMeltPeaks            |
| intl1      | 2A | 19.06 | 87.54 | 2.03 |                              |
| IS613      | 2A | 26.75 | 79.31 | 2.07 |                              |
| lnuA-01    | 2A |       |       |      | NoAmplification              |
| lnuB-01    | 2A |       |       |      | NoAmplification              |
| lnuB-02    | 2A |       |       |      | NoAmplification              |

|                |    |       |       |      |                   |
|----------------|----|-------|-------|------|-------------------|
| lnuC           | 2A | 28.65 | 88.12 | 1.8  |                   |
| marR-01        | 2A | 33.93 | 85.22 | 1.88 |                   |
| matA/mel       | 2A | 22.39 | 77.6  | 2.05 |                   |
| mdet1          | 2A |       |       |      | NoAmplification   |
| mdtA           | 2A | 32.15 | 81.96 | 1.81 |                   |
| mdtE/yhiU      | 2A | 32.11 | 85.21 | 1.84 |                   |
| mecA           | 2A |       |       |      | NoAmplification   |
| mefA           | 2A | 21.69 | 80.5  | 1.94 |                   |
| mepA           | 2A | 30.96 | 87.29 | 1.96 |                   |
| mexA           | 2A | 33.75 | 85.81 | 1.77 |                   |
| mexD           | 2A | 31.73 | 84.65 | 1.79 | MultipleMeltPeaks |
| mexE           | 2A | 34.75 | 87.51 | 1.86 | MultipleMeltPeaks |
| mexF           | 2A | 25.21 | 87.08 | 2.18 |                   |
| mphA-01        | 2A | 27.52 | 87.21 | 1.96 | MultipleMeltPeaks |
| mphA-02        | 2A | 25.74 | 86.78 | 2.08 |                   |
| mphB           | 2A |       |       |      | NoAmplification   |
| mphC           | 2A | 31.39 | 85.69 | 1.92 |                   |
| msrA-01        | 2A |       |       |      | NoAmplification   |
| msrC-01        | 2A |       |       |      | NoAmplification   |
| mtrC-01        | 2A | 37.75 | 79.62 | 1.79 | MultipleMeltPeaks |
| mtrC-02        | 2A | 28.02 | 84.2  | 2.04 | MultipleMeltPeaks |
| mtrD-02        | 2A | 26    | 82.29 | 1.89 |                   |
| mtrD-03        | 2A | 30.59 | 87.96 | 1.98 |                   |
| NDM1           | 2A |       |       |      | NoAmplification   |
| nimE           | 2A | 34.78 | 86.92 | 1.96 | MultipleMeltPeaks |
| nisB           | 2A | 36.54 | 82.79 | 1.89 |                   |
| oleC           | 2A | 35.03 | 89.58 | 1.88 |                   |
| oprD           | 2A | 26.31 | 86.82 | 2.03 |                   |
| oprJ           | 2A | 34.1  | 91.38 | 1.9  |                   |
| pbp            | 2A | 33.94 | 81.19 | 1.92 |                   |
| pbp2x          | 2A | 20.53 | 75.72 | 2.06 |                   |
| Pbp5           | 2A |       |       |      | NoAmplification   |
| penA           | 2A | 29.34 | 87.98 | 1.76 | MultipleMeltPeaks |
| pikR1          | 2A | 36.23 | 87.4  | 1.85 |                   |
| pikR2          | 2A | 28.41 | 84.89 | 2.12 |                   |
| pmrA           | 2A | 20.94 | 79.61 | 2.15 |                   |
| pncA           | 2A | 30.93 | 90.14 | 1.95 | MultipleMeltPeaks |
| putative multi | 2A | 31.34 | 84.42 | 1.96 |                   |
| qac            | 2A | 37.49 | 86.69 | 1.72 |                   |
| qacA           | 2A |       |       |      | NoAmplification   |
| qacA/qacB      | 2A | 32.44 | 87    | 1.63 | MultipleMeltPeaks |
| qacEdelta1-0   | 2A | 28.5  | 79.24 | 1.92 |                   |
| qacEdelta1-0   | 2A | 27.65 | 78.62 | 1.95 |                   |
| qacH-01        | 2A | 29.85 | 86.73 | 2.05 |                   |
| qacH-02        | 2A | 29.91 | 84    | 1.73 |                   |
| qnrA           | 2A | 34.95 | 79.71 | 2    |                   |



|              |    |       |       |      |                   |
|--------------|----|-------|-------|------|-------------------|
| rarD-02      | 2A | 35.31 | 84.54 | 1.96 | MultipleMeltPeaks |
| sat4         | 2A |       |       |      | NoAmplification   |
| sdeB         | 2A | 37.97 | 80.76 | 1.77 | MultipleMeltPeaks |
| spcN-01      | 2A | 35.5  | 86.76 | 1.94 |                   |
| speA         | 2A |       |       |      | NoAmplification   |
| str          | 2A |       |       |      | NoAmplification   |
| strA         | 2A |       |       |      | NoAmplification   |
| strB         | 2A | 27.36 | 84.06 | 1.94 |                   |
| sul1         | 2A | 28.28 | 89.84 | 1.91 |                   |
| sul2         | 2A |       |       |      | NoAmplification   |
| sulA/foIP-01 | 2A | 19.75 | 80.8  | 1.97 |                   |
| sulA/foIP-03 | 2A | 20.54 | 83.59 | 1.97 |                   |
| tet(32)      | 2A | 27.57 | 81.24 | 1.96 |                   |
| tet(34)      | 2A | 28.24 | 76.24 | 1.99 |                   |
| tet(35)      | 2A | 33.26 | 84.38 | 1.98 |                   |
| tet(36)-A    | 2A | 36.69 | 82.22 | 1.91 | MultipleMeltPeaks |
| tet(36)-B    | 2A |       |       |      | NoAmplification   |
| tet(37)      | 2A | 27.19 | 81.77 | 2    | MultipleMeltPeaks |
| tetA-01      | 2A | 28.92 | 85.22 | 1.92 |                   |
| tetA-02      | 2A | 33.36 | 80.38 | 1.91 |                   |
| tetB-01      | 2A | 27.75 | 87.83 | 1.97 | MultipleMeltPeaks |
| tetB-02      | 2A | 25.89 | 79.72 | 1.98 |                   |
| tetC-01      | 2A | 28.4  | 75.15 | 1.98 |                   |
| tetC-02      | 2A | 27.83 | 76    | 2.05 |                   |
| tetD-01      | 2A |       |       |      | NoAmplification   |
| tetD-02      | 2A |       |       |      | NoAmplification   |
| tetE         | 2A |       |       |      | NoAmplification   |
| tetG-01      | 2A | 29.01 | 87.16 | 2.05 |                   |
| tetG-02      | 2A | 27.99 | 87.26 | 1.91 |                   |
| tetH         | 2A |       |       |      | NoAmplification   |
| tetJ         | 2A |       |       |      | NoAmplification   |
| tetK         | 2A |       |       |      | NoAmplification   |
| tetL-01      | 2A | 32.77 | 81.02 | 1.9  |                   |
| tetL-02      | 2A | 31.46 | 85.25 | 1.84 |                   |
| tetM-01      | 2A | 21.95 | 76.04 | 2.02 |                   |
| tetM-02      | 2A | 22.45 | 77.83 | 2.03 |                   |
| tetO-01      | 2A | 28.4  | 76.88 | 2.02 |                   |
| tetPA        | 2A |       |       |      | NoAmplification   |
| tetPB-01     | 2A | 36.14 | 87.63 | 1.91 |                   |
| tetPB-02     | 2A | 27.94 | 85.06 | 2.05 |                   |
| tetPB-03     | 2A |       |       |      | NoAmplification   |
| tetPB-05     | 2A |       |       |      | NoAmplification   |
| tetQ         | 2A | 25.88 | 76.28 | 2.08 |                   |
| tetR-02      | 2A | 28.04 | 89.7  | 1.83 |                   |
| tetR-03      | 2A |       |       |      | NoAmplification   |
| tetS         | 2A | 33.47 | 79.21 | 1.99 | MultipleMeltPeaks |

|             |    |       |       |      |                             |
|-------------|----|-------|-------|------|-----------------------------|
| tetT        | 2A |       |       |      | NoAmplification             |
| tetU-01     | 2A |       |       |      | NoAmplification             |
| tetV        | 2A |       |       |      | NoAmplification             |
| tetW-01     | 2A |       |       |      | NoAmplification             |
| tetX        | 2A |       |       |      | BadR2, CtlSsmall, Saturatio |
| tnpA-01     | 2A | 33.06 | 79.19 | 1.94 | MultipleMeltPeaks           |
| tnpA-02     | 2A | 29.35 | 89.45 | 1.88 |                             |
| tnpA-03     | 2A | 29.97 | 77.95 | 2.08 |                             |
| tnpA-04     | 2A | 36.37 | 85.62 | 1.76 | MultipleMeltPeaks           |
| tnpA-05     | 2A | 28.77 | 80.81 | 1.89 |                             |
| tnpA-07     | 2A | 25.58 | 76.84 | 1.98 |                             |
| tolC-01     | 2A | 32.16 | 83.93 | 1.89 | MultipleMeltPeaks           |
| tolC-02     | 2A | 26.11 | 93.48 | 1.99 | MultipleMeltPeaks           |
| tolC-03     | 2A | 28.01 | 85.78 | 1.96 | MultipleMeltPeaks           |
| Tp614       | 2A | 32.56 | 86.77 | 2.01 |                             |
| ttgA        | 2A | 31.6  | 87.65 | 1.85 |                             |
| ttgB        | 2A | 33.34 | 84.44 | 2    | MultipleMeltPeaks           |
| vanA        | 2A |       |       |      | NoAmplification             |
| vanB-01     | 2A | 30.39 | 83.93 | 2.12 | MultipleMeltPeaks           |
| vanC-01     | 2A | 34.91 | 73.3  | 2.14 |                             |
| vanC-02     | 2A |       |       |      | NoAmplification             |
| vanC-03     | 2A | 23.32 | 85.98 | 1.94 | MultipleMeltPeaks           |
| vanC1       | 2A |       |       |      | NoAmplification             |
| vanC2/vanC3 | 2A | 31.09 | 82.25 | 1.85 |                             |
| vanG        | 2A |       |       |      | NoAmplification             |
| vanHB       | 2A | 36.44 | 79.21 | 1.89 |                             |
| vanHD       | 2A | 31.73 | 83.5  | 1.94 |                             |
| vanRA-01    | 2A |       |       |      | NoAmplification             |
| vanRA-02    | 2A | 36.21 | 81.45 | 1.8  |                             |
| vanRB       | 2A | 29.58 | 87.5  | 2.01 |                             |
| vanRC       | 2A |       |       |      | NoAmplification             |
| vanRC4      | 2A |       |       |      | NoAmplification             |
| vanRD       | 2A |       |       |      | NoAmplification             |
| vanSA       | 2A |       |       |      | NoAmplification             |
| vanSB       | 2A | 29.93 | 74.77 | 1.97 |                             |
| vanSC-01    | 2A | 31.47 | 84.25 | 1.97 |                             |
| vanSC-02    | 2A |       |       |      | NoAmplification             |
| vanTC-01    | 2A |       |       |      | NoAmplification             |
| vanTC-02    | 2A | 36.83 | 82.76 | 1.78 |                             |
| vanTE       | 2A | 35.01 | 88.41 | 1.79 | MultipleMeltPeaks           |
| vanTG       | 2A |       |       |      | BadR2, CtlSsmall, Saturatio |
| vanWB       | 2A |       |       |      | NoAmplification             |
| vanWG       | 2A |       |       |      | NoAmplification             |
| vanXA       | 2A | 34.6  | 77.53 | 1.95 |                             |
| vanXB       | 2A |       |       |      | NoAmplification             |
| vanXD       | 2A | 29.79 | 76.29 | 2.03 |                             |

|              |    |       |       |      |                   |
|--------------|----|-------|-------|------|-------------------|
| vanYB        | 2A | 36.07 | 86.09 | 1.9  | MultipleMeltPeaks |
| vanYD-01     | 2A | 29.18 | 83.32 | 1.89 | MultipleMeltPeaks |
| vanYD-02     | 2A | 37.96 | 79.99 | 1.93 | MultipleMeltPeaks |
| vatB-01      | 2A |       |       |      | NoAmplification   |
| vatB-02      | 2A | 37.49 | 80.63 | 1.91 | MultipleMeltPeaks |
| vatC-01      | 2A | 31.82 | 81.32 | 1.89 |                   |
| vatC-02      | 2A | 31.48 | 87.49 | 1.94 |                   |
| vatE-01      | 2A | 27.54 | 77.68 | 2.01 |                   |
| vatE-02      | 2A | 35.34 | 86.71 | 1.99 |                   |
| vgaA-01      | 2A |       |       |      | NoAmplification   |
| vgaA-02      | 2A | 33.97 | 81.29 | 1.89 | MultipleMeltPeaks |
| vgb-01       | 2A | 36.02 | 87.13 | 1.83 | MultipleMeltPeaks |
| vgbB-01      | 2A | 34.24 | 86.8  | 1.76 | MultipleMeltPeaks |
| vgbB-02      | 2A | 37.45 | 79.16 | 1.66 |                   |
| yceE/mdtG-0  | 2A | 32.3  | 81.17 | 2.14 |                   |
| yceE/mdtG-0  | 2A | 35.81 | 81.57 | 1.85 |                   |
| yceL/mdtH-0  | 2A | 28.01 | 86.21 | 2.04 |                   |
| yceL/mdtH-0  | 2A |       |       |      | NoAmplification   |
| yceL/mdtH-0  | 2A | 31.21 | 87.09 | 1.98 |                   |
| yidY/mdtL-01 | 2A | 26.88 | 88.7  | 2.01 | MultipleMeltPeaks |
| yidY/mdtL-02 | 2A |       |       |      | NoAmplification   |































| Assay          | Sample | Ct | Tm    | Efficiency | flag                              |
|----------------|--------|----|-------|------------|-----------------------------------|
| 16S rRNA       | 2B     |    | 15.12 | 81.93      | 2.05                              |
| aac            | 2B     |    | 29.47 | 81.67      | 1.92 SaturationBaselineRatiolsL   |
| aac(6')-Ib(akε | 2B     |    |       |            | LowEfficiency, CtIsSmall, Ci      |
| aac(6')-Ib(akε | 2B     |    | 30.95 | 81.73      | 1.98 CtIsLarge, MultipleMeltPez   |
| aac(6')-Ib(akε | 2B     |    | 31.18 | 78.03      | 2.04 CtIsLarge, MultipleMeltPez   |
| aac(6')-II     | 2B     |    | 33.3  | 85.42      | 1.84 CtIsLarge, SaturationBaseli  |
| aac(6')I1      | 2B     |    | 33.2  | 90.88      | 1.78 LowEfficiency, CtIsLarge, M  |
| aacA/aphD      | 2B     |    |       |            | CurveFitFailed                    |
| aacC           | 2B     |    | 28.61 | 88.39      | 2.17 SaturationBaselineRatiolsL   |
| aacC1          | 2B     |    |       |            | NoAmplification                   |
| aacC2          | 2B     |    |       |            | NoAmplification                   |
| aacC4          | 2B     |    | 29.69 | 89.92      | 1.97 CtIsLarge, SaturationBaseli  |
| aadA-01        | 2B     |    |       |            | BadR2, LowEfficiency, CtIsS       |
| aadA-02        | 2B     |    | 34.73 | 80.38      | 1.92 CtIsLarge                    |
| aadA-1-01      | 2B     |    |       |            | CtIsLarge, CurveFitFailed         |
| aadA-1-02      | 2B     |    |       |            | LowEfficiency, CtIsSmall, Ci      |
| aadA1          | 2B     |    | 33.43 | 83.93      | 2.01 CtIsLarge                    |
| aadA2-01       | 2B     |    | 33.96 | 91.06      | 1.83 CtIsLarge                    |
| aadA2-02       | 2B     |    | 30.63 | 75.24      | 1.92 CtIsLarge, SaturationBaseli  |
| aadA2-03       | 2B     |    |       |            | LowEfficiency, CtIsLarge, Ci      |
| aadA5-01       | 2B     |    | 34.78 | 88.4       | 1.85 CtIsLarge, SaturationBaseli  |
| aadA5-02       | 2B     |    | 30.31 | 87.85      | 1.98 CtIsLarge                    |
| aadA9-01       | 2B     |    |       |            | LowEfficiency, CtIsLarge, Ci      |
| aadA9-02       | 2B     |    | 33.27 | 89.98      | 1.98 CtIsLarge                    |
| aadD           | 2B     |    |       |            | NoAmplification                   |
| aadE           | 2B     |    |       |            | NoAmplification                   |
| acrA-01        | 2B     |    | 26.21 | 82.52      | 1.96 SaturationBaselineRatiolsL   |
| acrA-02        | 2B     |    | 32.61 | 88.48      | 1.96 CtIsLarge                    |
| acrA-03        | 2B     |    | 32.35 | 88.21      | 2.04 CtIsLarge, SaturationBaseli  |
| acrA-04        | 2B     |    | 27.73 | 84.44      | 2.04 MultipleMeltPeaks            |
| acrA-05        | 2B     |    | 29.22 | 88.09      | 2.02 SaturationBaselineRatiolsL   |
| acrB-01        | 2B     |    |       |            | CtIsLarge, CurveFitFailed         |
| acrF           | 2B     |    | 29.3  | 84.38      | 1.78 LowEfficiency, SaturationB:  |
| acrR-01        | 2B     |    | 31.39 | 90.43      | 1.99 CtIsLarge                    |
| acrR-02        | 2B     |    | 32.31 | 85.23      | 1.97 CtIsLarge, SaturationBaseli  |
| Actin          | 2B     |    | 21.07 | 86.75      | 1.96                              |
| adeA           | 2B     |    |       |            | LowEfficiency, CtIsLarge, S:      |
| ampC-01        | 2B     |    | 30.17 | 80.1       | 1.89 CtIsLarge, SaturationBaseli  |
| ampC-02        | 2B     |    | 30.59 | 88.62      | 1.83 CtIsLarge, MultipleMeltPez   |
| ampC-04        | 2B     |    | 30.92 | 80.54      | 1.73 LowEfficiency, CtIsLarge     |
| ampC-05        | 2B     |    |       |            | LowEfficiency, CtIsSmall, Ci      |
| ampC-06        | 2B     |    |       |            | NoAmplification                   |
| ampC-07        | 2B     |    | 30.66 | 88.37      | 1.83 CtIsLarge, SaturationBaseli  |
| ampC-09        | 2B     |    | 33.68 | 91.29      | 1.78 LowEfficiency, CtIsLarge, S: |
| ampC/blaDH     | 2B     |    | 29.8  | 85.6       | 1.96 CtIsLarge, SaturationBaseli  |

|                          |    |       |       |      |                                          |
|--------------------------|----|-------|-------|------|------------------------------------------|
| aph                      | 2B |       |       |      | LowEfficiency, CtIsSmall, Ci             |
| aph(2')-Id-01            | 2B |       |       |      | CurveFitFailed                           |
| aph(2')-Id-02            | 2B |       |       |      | NoAmplification                          |
| aph6ia                   | 2B | 30.88 | 77.87 | 1.99 | CtIsLarge, SaturationBaseli              |
| aphA1(aka k <sub>a</sub> | 2B |       |       |      | LowEfficiency, CtIsSmall, Ci             |
| bacA-01                  | 2B |       |       |      | LowEfficiency, CtIsSmall, S <sub>e</sub> |
| bacA-02                  | 2B | 34.24 | 88.18 | 1.77 | LowEfficiency, CtIsLarge, S <sub>e</sub> |
| BETA-globin              | 2B | 21.57 | 83.96 | 2.01 |                                          |
| bla-ACC-1                | 2B | 33.85 | 87.27 | 1.9  | CtIsLarge, SaturationBaseli              |
| bla-L1                   | 2B | 30.47 | 88.16 | 2    | CtIsLarge, SaturationBaseli              |
| bla1                     | 2B |       |       |      | NoAmplification                          |
| blaCMY                   | 2B |       |       |      | CtIsLarge, CurveFitFailed                |
| blaCMY2-01               | 2B |       |       |      | CtIsLarge, CurveFitFailed                |
| blaCMY2-02               | 2B | 27.9  | 85.02 | 2.03 | MultipleMeltPeaks                        |
| blaCTX-M-01              | 2B |       |       |      | LowEfficiency, CtIsLarge, S <sub>e</sub> |
| blaCTX-M-02              | 2B | 30.02 | 90.13 | 1.96 | CtIsLarge                                |
| blaCTX-M-03              | 2B | 34.02 | 84.41 | 1.92 | CtIsLarge, SaturationBaseli              |
| blaCTX-M-04              | 2B | 29.27 | 87.32 | 2.01 | MultipleMeltPeaks                        |
| blaCTX-M-05              | 2B |       |       |      | LowEfficiency, CtIsLarge, S <sub>e</sub> |
| blaCTX-M-06              | 2B |       |       |      | NoAmplification                          |
| blaGES                   | 2B |       |       |      | LowEfficiency, CtIsSmall, S <sub>e</sub> |
| blaIMP-01                | 2B |       |       |      | NoAmplification                          |
| blaIMP-02                | 2B |       |       |      | CtIsLarge, SaturationBaseli              |
| blaMOX/blaC              | 2B |       |       |      | BadR2, LowEfficiency, CtIsS              |
| blaOCH                   | 2B |       |       |      | NoAmplification                          |
| blaOKP                   | 2B |       |       |      | NoAmplification                          |
| blaOXA1/blaC             | 2B |       |       |      | LowEfficiency, CtIsSmall, Ci             |
| blaOXA10-01              | 2B |       |       |      | LowEfficiency, CtIsSmall, Ci             |
| blaOXA10-02              | 2B |       |       |      | LowEfficiency, CtIsSmall, Ci             |
| blaOXY                   | 2B | 31.02 | 89.85 | 1.85 | CtIsLarge                                |
| blaPAO                   | 2B |       |       |      | NoAmplification                          |
| blaPER                   | 2B |       |       |      | CurveFitFailed                           |
| blaPSE                   | 2B |       |       |      | LowEfficiency, CtIsSmall, S <sub>e</sub> |
| blaROB                   | 2B | 34.32 | 87.28 | 1.9  | CtIsLarge, SaturationBaseli              |
| blaSFO                   | 2B | 29.49 | 89.8  | 1.98 |                                          |
| blaSHV-01                | 2B | 27.1  | 88.81 | 1.82 |                                          |
| blaSHV-02                | 2B |       |       |      | CtIsLarge, SaturationBaseli              |
| blaTEM                   | 2B | 18.65 | 79.09 | 1.77 | LowEfficiency, SaturationB <sub>e</sub>  |
| blaTLA                   | 2B |       |       |      | NoAmplification                          |
| blaVEB                   | 2B |       |       |      | NoAmplification                          |
| blaVIM                   | 2B |       |       |      | NoAmplification                          |
| blaZ                     | 2B |       |       |      | NoAmplification                          |
| carB                     | 2B |       |       |      | LowEfficiency, CtIsSmall, S <sub>e</sub> |
| catA1                    | 2B |       |       |      | NoAmplification                          |
| catB3                    | 2B | 34.27 | 79.75 | 1.99 | CtIsLarge, SaturationBaseli              |
| catB8                    | 2B | 28.45 | 82.02 | 2.07 | SaturationBaselineRatiolsL               |

|            |    |       |       |      |                              |
|------------|----|-------|-------|------|------------------------------|
| ceoA       | 2B | 28.67 | 87.79 | 2.02 | SaturationBaselineRatiolsL   |
| cepA       | 2B |       |       |      | LowEfficiency, CtIsSmall, S: |
| cfiA       | 2B | 28.47 | 88.37 | 2.03 | SaturationBaselineRatiolsL   |
| cfr        | 2B |       |       |      | LowEfficiency, CtIsSmall, C: |
| cfxA       | 2B | 20.5  | 77.44 | 2.03 |                              |
| cmeA       | 2B |       |       |      | CurveFitFailed               |
| cmlA1-01   | 2B | 30.41 | 89.49 | 1.85 | CtIsLarge, SaturationBaseli  |
| cmlA1-02   | 2B | 31.71 | 89.54 | 1.91 | CtIsLarge, SaturationBaseli  |
| cmr        | 2B |       |       |      | CurveFitFailed               |
| cmx(A)     | 2B | 27.89 | 87.09 | 2.12 | SaturationBaselineRatiolsL   |
| cphA-01    | 2B | 28.48 | 87.94 | 1.95 |                              |
| cphA-02    | 2B | 33.21 | 82.27 | 1.96 | CtIsLarge                    |
| dfrA1      | 2B | 33.97 | 79.07 | 1.95 | CtIsLarge                    |
| dfrA12     | 2B | 31.45 | 87.13 | 1.97 | CtIsLarge                    |
| emrD       | 2B | 32.86 | 83.49 | 1.89 | CtIsLarge, MultipleMeltPe:   |
| ereA       | 2B |       |       |      | CtIsLarge, SaturationBaseli  |
| ereB       | 2B | 31.74 | 75.5  | 2.13 | CtIsLarge                    |
| erm(34)    | 2B | 31.75 | 80.8  | 1.93 | CtIsLarge                    |
| erm(35)    | 2B |       |       |      | NoAmplification              |
| erm(36)    | 2B |       |       |      | LowEfficiency, CtIsLarge, S: |
| ermA       | 2B |       |       |      | NoAmplification              |
| ermA/ermTR | 2B | 26.32 | 75.62 | 1.98 | SaturationBaselineRatiolsL   |
| ermB       | 2B | 17.19 | 74.79 | 2.28 | SaturationBaselineRatiolsL   |
| ermC       | 2B |       |       |      | CurveFitFailed               |
| ermF       | 2B | 21.73 | 74.54 | 2.06 |                              |
| ermJ/ermD  | 2B |       |       |      | LowEfficiency, CtIsSmall, C: |
| ermK-01    | 2B | 33.16 | 79.11 | 1.94 | CtIsLarge                    |
| ermK-02    | 2B | 31.39 | 76.85 | 1.82 | CtIsLarge, MultipleMeltPe:   |
| ermT-01    | 2B |       |       |      | LowEfficiency, CtIsSmall, C: |
| ermT-02    | 2B |       |       |      | CurveFitFailed               |
| ermX       | 2B | 19.67 | 83.52 | 1.93 | SaturationBaselineRatiolsL   |
| ermY       | 2B |       |       |      | CurveFitFailed               |
| fabK       | 2B | 18.65 | 77.53 | 2.24 |                              |
| floR       | 2B | 34.33 | 90.14 | 1.76 | LowEfficiency, CtIsLarge     |
| folA       | 2B |       |       |      | NoAmplification              |
| fosB       | 2B |       |       |      | LowEfficiency, CtIsSmall, S: |
| fosX       | 2B |       |       |      | NoAmplification              |
| fox5       | 2B | 25.71 | 86.49 | 2    |                              |
| imiR       | 2B |       |       |      | BadR2, LowEfficiency, CtIsS  |
| ImrA-01    | 2B |       |       |      | CurveFitFailed               |
| intl       | 2B | 30.91 | 84.71 | 1.71 | LowEfficiency, CtIsLarge, S: |
| intl1      | 2B | 19.59 | 87.5  | 2.1  | SaturationBaselineRatiolsL   |
| IS613      | 2B | 23.93 | 79.46 | 1.74 | LowEfficiency                |
| lnuA-01    | 2B |       |       |      | LowEfficiency, CtIsSmall, S: |
| lnuB-01    | 2B |       |       |      | CurveFitFailed               |
| lnuB-02    | 2B |       |       |      | LowEfficiency, CtIsSmall, S: |

|                |    |       |       |                                   |
|----------------|----|-------|-------|-----------------------------------|
| lnuC           | 2B | 33.17 | 85.26 | 1.81 CtlIsLarge, SaturationBaseli |
| marR-01        | 2B | 31.03 | 85.09 | 1.93 CtlIsLarge                   |
| matA/mel       | 2B | 17.66 | 77.56 | 2.12 SaturationBaselineRatiolsL   |
| mdet1          | 2B |       |       | LowEfficiency, CtlIsSmall, Ci     |
| mdtA           | 2B | 33.27 | 82.04 | 1.84 CtlIsLarge, SaturationBaseli |
| mdtE/yhiU      | 2B | 33.69 | 83.65 | 1.88 CtlIsLarge, MultipleMeltPez  |
| mecA           | 2B |       |       | NoAmplification                   |
| mefA           | 2B | 17.19 | 80.48 | 2.1 SaturationBaselineRatiolsL    |
| mepA           | 2B | 29.08 | 86.86 | 2.05                              |
| mexA           | 2B |       |       | LowEfficiency, CtlIsLarge, Ci     |
| mexD           | 2B | 31.94 | 79.84 | 1.98 CtlIsLarge, SaturationBaseli |
| mexE           | 2B | 32.56 | 88.2  | 1.91 CtlIsLarge                   |
| mexF           | 2B | 26.79 | 87.25 | 2.13 MultipleMeltPeaks            |
| mphA-01        | 2B | 28.57 | 86.74 | 1.99                              |
| mphA-02        | 2B | 27.89 | 86.77 | 2.25 MultipleMeltPeaks            |
| mphB           | 2B | 33.77 | 89.28 | 2 CtlIsLarge, MultipleMeltPez     |
| mphC           | 2B |       |       | CtlIsLarge, CurveFitFailed        |
| msrA-01        | 2B |       |       | LowEfficiency, CtlIsSmall, Ci     |
| msrC-01        | 2B |       |       | NoAmplification                   |
| mtrC-01        | 2B |       |       | CtlIsLarge, SaturationBaseli      |
| mtrC-02        | 2B | 34.57 | 84.25 | 1.86 CtlIsLarge, SaturationBaseli |
| mtrD-02        | 2B | 27.1  | 81.4  | 1.95 SaturationBaselineRatiolsL   |
| mtrD-03        | 2B | 29.11 | 82.92 | 1.86 SaturationBaselineRatiolsL   |
| NDM1           | 2B |       |       | CtlIsLarge, CurveFitFailed        |
| nimE           | 2B |       |       | LowEfficiency, CtlIsSmall, Ci     |
| nisB           | 2B | 34.59 | 86.32 | 1.84 CtlIsLarge                   |
| oleC           | 2B | 31.64 | 89.22 | 1.88 CtlIsLarge                   |
| oprD           | 2B | 27.85 | 86.62 | 1.99 SaturationBaselineRatiolsL   |
| oprJ           | 2B | 29.29 | 90.84 | 1.99 SaturationBaselineRatiolsL   |
| pbp            | 2B |       |       | LowEfficiency, CtlIsSmall, S;     |
| pbp2x          | 2B | 19.66 | 76    | 2.1                               |
| Pbp5           | 2B |       |       | NoAmplification                   |
| penA           | 2B | 33.61 | 89.59 | 1.96 CtlIsLarge, SaturationBaseli |
| pikR1          | 2B | 31.57 | 89.68 | 1.98 CtlIsLarge                   |
| pikR2          | 2B | 29.89 | 84.38 | 2.06 CtlIsLarge                   |
| pmrA           | 2B | 19.19 | 79.66 | 2.16                              |
| pncA           | 2B | 33.38 | 80.45 | 1.9 CtlIsLarge, MultipleMeltPez   |
| putative multi | 2B | 29.45 | 83.97 | 2                                 |
| qac            | 2B | 34.14 | 81.82 | 1.95 CtlIsLarge                   |
| qacA           | 2B |       |       | LowEfficiency, CtlIsSmall, Ci     |
| qacA/qacB      | 2B |       |       | LowEfficiency, CtlIsSmall, Ci     |
| qacEdelta1-0   | 2B |       |       | LowEfficiency, CtlIsSmall, Ci     |
| qacEdelta1-0   | 2B | 30.86 | 88.27 | 1.99 CtlIsLarge, SaturationBaseli |
| qacH-01        | 2B | 28.68 | 87.73 | 2.01                              |
| qacH-02        | 2B |       |       | LowEfficiency, CtlIsLarge, Ci     |
| qnrA           | 2B | 34.84 | 87.43 | 1.95 CtlIsLarge                   |

|              |    |       |       |      |                              |
|--------------|----|-------|-------|------|------------------------------|
| rarD-02      | 2B |       |       |      | CtIsLarge, CurveFitFailed    |
| sat4         | 2B |       |       |      | CurveFitFailed               |
| sdeB         | 2B |       |       |      | CurveFitFailed               |
| spcN-01      | 2B |       |       |      | LowEfficiency, CtIsSmall, Ci |
| speA         | 2B |       |       |      | NoAmplification              |
| str          | 2B |       |       |      | LowEfficiency, CtIsSmall, Ci |
| strA         | 2B |       |       |      | LowEfficiency, CtIsSmall, Ci |
| strB         | 2B |       |       |      | CurveFitFailed               |
| sul1         | 2B | 31.83 | 89.45 | 1.91 | CtIsLarge, SaturationBaseli  |
| sul2         | 2B | 33.78 | 88.88 | 2.09 | CtIsLarge, SaturationBaseli  |
| sulA/foIP-01 | 2B | 17.23 | 81.42 | 2.1  |                              |
| sulA/foIP-03 | 2B | 18.08 | 82.89 | 2.05 |                              |
| tet(32)      | 2B | 25.43 | 86.65 | 1.98 | MultipleMeltPeaks            |
| tet(34)      | 2B | 32.89 | 75.02 | 1.88 | CtIsLarge, SaturationBaseli  |
| tet(35)      | 2B | 28.23 | 82    | 1.98 | SaturationBaselineRatIoSL    |
| tet(36)-A    | 2B | 34.09 | 81.86 | 2.08 | CtIsLarge, SaturationBaseli  |
| tet(36)-B    | 2B | 34.92 | 83.65 | 1.92 | CtIsLarge, SaturationBaseli  |
| tet(37)      | 2B | 20.69 | 83.82 | 2    | SaturationBaselineRatIoSL    |
| tetA-01      | 2B | 16.96 | 83.07 | 2.22 | SaturationBaselineRatIoSL    |
| tetA-02      | 2B | 30.72 | 88.87 | 1.99 | CtIsLarge                    |
| tetB-01      | 2B | 26.18 | 86.29 | 1.99 | MultipleMeltPeaks            |
| tetB-02      | 2B | 24.43 | 79.61 | 1.97 |                              |
| tetC-01      | 2B | 24.59 | 75.32 | 1.95 |                              |
| tetC-02      | 2B | 24.52 | 75.96 | 2.04 |                              |
| tetD-01      | 2B |       |       |      | LowEfficiency, CtIsSmall, Ci |
| tetD-02      | 2B |       |       |      | CtIsLarge, SaturationBaseli  |
| tetE         | 2B |       |       |      | CurveFitFailed               |
| tetG-01      | 2B |       |       |      | LowEfficiency, CtIsSmall, S: |
| tetG-02      | 2B |       |       |      | LowEfficiency, CtIsSmall, S: |
| tetH         | 2B |       |       |      | LowEfficiency, CtIsSmall, Ci |
| tetJ         | 2B |       |       |      | NoAmplification              |
| tetK         | 2B |       |       |      | LowEfficiency, CtIsSmall, S: |
| tetL-01      | 2B |       |       |      | LowEfficiency, CtIsSmall, Ci |
| tetL-02      | 2B |       |       |      | CurveFitFailed               |
| tetM-01      | 2B |       |       |      | LowEfficiency, CtIsSmall, Ci |
| tetM-02      | 2B | 17.54 | 77.43 | 2.11 |                              |
| tetO-01      | 2B | 22.57 | 76.8  | 2.08 |                              |
| tetPA        | 2B |       |       |      | NoAmplification              |
| tetPB-01     | 2B |       |       |      | CtIsLarge, CurveFitFailed    |
| tetPB-02     | 2B | 29.35 | 84.69 | 2.04 |                              |
| tetPB-03     | 2B |       |       |      | CurveFitFailed               |
| tetPB-05     | 2B |       |       |      | CurveFitFailed               |
| tetQ         | 2B | 21.44 | 77.17 | 2.11 |                              |
| tetR-02      | 2B | 28.75 | 90.96 | 1.94 | MultipleMeltPeaks            |
| tetR-03      | 2B | 23.84 | 76.03 | 2.01 | SaturationBaselineRatIoSL    |
| tetS         | 2B | 32.86 | 85.64 | 1.93 | CtIsLarge, SaturationBaseli  |

|             |    |       |       |      |                              |
|-------------|----|-------|-------|------|------------------------------|
| tetT        | 2B |       |       |      | LowEfficiency, CtIsSmall, Ci |
| tetU-01     | 2B |       |       |      | NoAmplification              |
| tetV        | 2B |       |       |      | LowEfficiency, CtIsSmall, Ci |
| tetW-01     | 2B | 25.4  | 81.57 | 2.03 |                              |
| tetX        | 2B |       |       |      | CurveFitFailed               |
| tnpA-01     | 2B | 34.95 | 79.15 | 1.93 | CtIsLarge, SaturationBaseli  |
| tnpA-02     | 2B |       |       |      | LowEfficiency, CtIsLarge, Ci |
| tnpA-03     | 2B | 34.99 | 73.92 | 1.86 | CtIsLarge, MultipleMeltPez   |
| tnpA-04     | 2B |       |       |      | CurveFitFailed               |
| tnpA-05     | 2B | 28.31 | 80.7  | 1.94 |                              |
| tnpA-07     | 2B | 27.73 | 76.46 | 2.03 |                              |
| tolC-01     | 2B | 32.63 | 88.81 | 1.84 | CtIsLarge, SaturationBaseli  |
| tolC-02     | 2B | 29.9  | 88.02 | 2.03 | CtIsLarge, SaturationBaseli  |
| tolC-03     | 2B | 29.92 | 87.62 | 2    | CtIsLarge, SaturationBaseli  |
| Tp614       | 2B | 30.37 | 83.31 | 1.98 | CtIsLarge                    |
| ttgA        | 2B | 32.95 | 89.56 | 1.93 | CtIsLarge, SaturationBaseli  |
| ttgB        | 2B | 34.93 | 91.13 | 1.96 | CtIsLarge, SaturationBaseli  |
| vanA        | 2B |       |       |      | NoAmplification              |
| vanB-01     | 2B | 30.8  | 82.61 | 2.03 | CtIsLarge, MultipleMeltPez   |
| vanC-01     | 2B |       |       |      | LowEfficiency, CtIsSmall, Ci |
| vanC-02     | 2B |       |       |      | BadR2, LowEfficiency, CtIsS  |
| vanC-03     | 2B | 25.72 | 90.84 | 2.01 |                              |
| vanC1       | 2B | 33.3  | 84.16 | 1.91 | CtIsLarge                    |
| vanC2/vanC3 | 2B | 33.64 | 85.06 | 1.93 | CtIsLarge, SaturationBaseli  |
| vanG        | 2B |       |       |      | LowEfficiency, CtIsSmall, Ci |
| vanHB       | 2B | 33.14 | 89.79 | 1.95 | CtIsLarge, MultipleMeltPez   |
| vanHD       | 2B |       |       |      | LowEfficiency, CtIsLarge, Ci |
| vanRA-01    | 2B |       |       |      | NoAmplification              |
| vanRA-02    | 2B | 33.72 | 84.1  | 1.88 | CtIsLarge, SaturationBaseli  |
| vanRB       | 2B | 31.91 | 87.1  | 1.91 | CtIsLarge, SaturationBaseli  |
| vanRC       | 2B |       |       |      | NoAmplification              |
| vanRC4      | 2B |       |       |      | NoAmplification              |
| vanRD       | 2B |       |       |      | NoAmplification              |
| vanSA       | 2B |       |       |      | LowEfficiency, CtIsSmall, S: |
| vanSB       | 2B | 28.71 | 74.69 | 2    |                              |
| vanSC-01    | 2B | 29.8  | 83.86 | 2.09 | CtIsLarge                    |
| vanSC-02    | 2B |       |       |      | NoAmplification              |
| vanTC-01    | 2B |       |       |      | LowEfficiency, CtIsSmall, Ci |
| vanTC-02    | 2B | 31.35 | 88.3  | 1.94 | CtIsLarge                    |
| vanTE       | 2B |       |       |      | CurveFitFailed               |
| vanTG       | 2B |       |       |      | LowEfficiency, CtIsSmall, Ci |
| vanWB       | 2B |       |       |      | CurveFitFailed               |
| vanWG       | 2B | 32.31 | 74.73 | 2.01 | CtIsLarge                    |
| vanXA       | 2B | 32.91 | 78.61 | 2.01 | CtIsLarge                    |
| vanXB       | 2B |       |       |      | NoAmplification              |
| vanXD       | 2B | 29.47 | 75    | 2.03 |                              |

|              |    |       |       |      |                              |
|--------------|----|-------|-------|------|------------------------------|
| vanYB        | 2B |       |       |      | CtIsLarge, CurveFitFailed    |
| vanYD-01     | 2B | 30.66 | 83.91 | 1.84 | CtIsLarge, MultipleMeltPea   |
| vanYD-02     | 2B |       |       |      | CtIsLarge, CurveFitFailed    |
| vatB-01      | 2B | 34.22 | 74.97 | 1.95 | CtIsLarge                    |
| vatB-02      | 2B |       |       |      | NoAmplification              |
| vatC-01      | 2B | 31.13 | 81.32 | 1.84 | CtIsLarge, SaturationBaseli  |
| vatC-02      | 2B | 33.38 | 86.34 | 1.91 | CtIsLarge, SaturationBaseli  |
| vatE-01      | 2B | 29.81 | 76.9  | 1.93 | CtIsLarge, SaturationBaseli  |
| vatE-02      | 2B |       |       |      | CtIsLarge, SaturationBaseli  |
| vgaA-01      | 2B | 33.74 | 83.25 | 1.91 | CtIsLarge, MultipleMeltPea   |
| vgaA-02      | 2B |       |       |      | CtIsLarge, CurveFitFailed    |
| vgb-01       | 2B | 33.76 | 87.17 | 1.89 | CtIsLarge                    |
| vgbB-01      | 2B |       |       |      | LowEfficiency, CtIsLarge, Ci |
| vgbB-02      | 2B |       |       |      | LowEfficiency, CtIsSmall, Ci |
| yceE/mdtG-0  | 2B |       |       |      | LowEfficiency, CtIsSmall, Ci |
| yceE/mdtG-0  | 2B | 34.6  | 80.84 | 1.95 | CtIsLarge                    |
| yceL/mdtH-0  | 2B |       |       |      | CtIsLarge, CurveFitFailed    |
| yceL/mdtH-0  | 2B |       |       |      | LowEfficiency, CtIsSmall, Ci |
| yceL/mdtH-0  | 2B | 33.94 | 86.88 | 1.9  | CtIsLarge, MultipleMeltPea   |
| yidY/mdtL-01 | 2B | 30.55 | 85.52 | 2    | CtIsLarge                    |
| yidY/mdtL-02 | 2B | 33.99 | 92.45 | 1.82 | CtIsLarge, SaturationBaseli  |































| Assay          | Sample | Ct | Tm    | Efficiency | flag                   |
|----------------|--------|----|-------|------------|------------------------|
| 16S rRNA       | 2C     |    | 18.58 | 82.22      | 2.01                   |
| aac            | 2C     |    | 32.87 | 80.86      | 1.73 MultipleMeltPeaks |
| aac(6')-Ib(akε | 2C     |    |       |            | NoAmplification        |
| aac(6')-Ib(akε | 2C     |    | 34.08 | 79.96      | 1.9 MultipleMeltPeaks  |
| aac(6')-Ib(akε | 2C     |    |       |            | CurveFitFailed         |
| aac(6')-II     | 2C     |    | 38.22 | 83.52      | 1.59 MultipleMeltPeaks |
| aac(6')I1      | 2C     |    |       |            | NoAmplification        |
| aacA/aphD      | 2C     |    |       |            | NoAmplification        |
| aacC           | 2C     |    | 32.79 | 81.23      | 1.71 MultipleMeltPeaks |
| aacC1          | 2C     |    |       |            | NoAmplification        |
| aacC2          | 2C     |    |       |            | NoAmplification        |
| aacC4          | 2C     |    |       |            | NoAmplification        |
| aadA-01        | 2C     |    |       |            | NoAmplification        |
| aadA-02        | 2C     |    | 37.37 | 80.64      | 1.87                   |
| aadA-1-01      | 2C     |    |       |            | NoAmplification        |
| aadA-1-02      | 2C     |    |       |            | NoAmplification        |
| aadA1          | 2C     |    | 37.78 | 83.47      | 1.78                   |
| aadA2-01       | 2C     |    |       |            | NoAmplification        |
| aadA2-02       | 2C     |    | 31.31 | 75.53      | 1.99                   |
| aadA2-03       | 2C     |    |       |            | CurveFitFailed         |
| aadA5-01       | 2C     |    |       |            | CurveFitFailed         |
| aadA5-02       | 2C     |    | 37.09 | 78.02      | 1.78                   |
| aadA9-01       | 2C     |    |       |            | CurveFitFailed         |
| aadA9-02       | 2C     |    | 37.39 | 73.87      | 2.14                   |
| aadD           | 2C     |    |       |            | NoAmplification        |
| aadE           | 2C     |    |       |            | NoAmplification        |
| acrA-01        | 2C     |    | 32.24 | 88.85      | 1.93                   |
| acrA-02        | 2C     |    | 40.8  | 62.1       | 1.38 MultipleMeltPeaks |
| acrA-03        | 2C     |    | 36.38 | 86.36      | 1.75                   |
| acrA-04        | 2C     |    | 30    | 81.96      | 1.96 MultipleMeltPeaks |
| acrA-05        | 2C     |    | 32.55 | 88.26      | 1.92 MultipleMeltPeaks |
| acrB-01        | 2C     |    | 34.34 | 76.05      | 2.08                   |
| acrF           | 2C     |    | 32.91 | 85.91      | 1.97                   |
| acrR-01        | 2C     |    | 33.92 | 89.24      | 1.89                   |
| acrR-02        | 2C     |    | 33.09 | 85.5       | 1.88                   |
| Actin          | 2C     |    | 24.67 | 86.88      | 1.93 MultipleMeltPeaks |
| adeA           | 2C     |    | 35.73 | 77.71      | 1.88                   |
| ampC-01        | 2C     |    | 33.15 | 84.41      | 1.94                   |
| ampC-02        | 2C     |    | 29.34 | 79.48      | 2                      |
| ampC-04        | 2C     |    | 35.95 | 81.2       | 1.93                   |
| ampC-05        | 2C     |    |       |            | NoAmplification        |
| ampC-06        | 2C     |    |       |            | CurveFitFailed         |
| ampC-07        | 2C     |    |       |            | NoAmplification        |
| ampC-09        | 2C     |    |       |            | NoAmplification        |
| ampC/blaDH     | 2C     |    | 30.31 | 85.3       | 1.96                   |

|                          |    |       |       |      |                   |
|--------------------------|----|-------|-------|------|-------------------|
| aph                      | 2C |       |       |      | NoAmplification   |
| aph(2')-Id-01            | 2C |       |       |      | NoAmplification   |
| aph(2')-Id-02            | 2C |       |       |      | NoAmplification   |
| aph6ia                   | 2C |       |       |      | NoAmplification   |
| aphA1(aka k <sub>ε</sub> | 2C |       |       |      | NoAmplification   |
| bacA-01                  | 2C | 37.14 | 76.94 | 1.87 |                   |
| bacA-02                  | 2C | 36.31 | 84.56 | 1.73 | MultipleMeltPeaks |
| BETA-globin              | 2C | 25.35 | 84.08 | 1.98 |                   |
| bla-ACC-1                | 2C | 38.46 | 63.56 | 1.73 | MultipleMeltPeaks |
| bla-L1                   | 2C | 30.61 | 81.99 | 1.95 | MultipleMeltPeaks |
| bla1                     | 2C |       |       |      | NoAmplification   |
| blaCMY                   | 2C |       |       |      | NoAmplification   |
| blaCMY2-01               | 2C |       |       |      | CurveFitFailed    |
| blaCMY2-02               | 2C | 30.51 | 82.65 | 1.95 | MultipleMeltPeaks |
| blaCTX-M-01              | 2C | 38.7  | 76.31 | 1.93 |                   |
| blaCTX-M-02              | 2C | 32.72 | 84.43 | 1.88 |                   |
| blaCTX-M-03              | 2C |       |       |      | NoAmplification   |
| blaCTX-M-04              | 2C |       |       |      | CurveFitFailed    |
| blaCTX-M-05              | 2C | 35.06 | 75.81 | 1.75 |                   |
| blaCTX-M-06              | 2C | 40.4  | 77.65 | 1.77 |                   |
| blaGES                   | 2C |       |       |      | NoAmplification   |
| blaIMP-01                | 2C | 38.23 | 74.68 | 2.02 | MultipleMeltPeaks |
| blaIMP-02                | 2C | 36.84 | 80.66 | 1.84 |                   |
| blaMOX/blaC              | 2C |       |       |      | NoAmplification   |
| blaOCH                   | 2C |       |       |      | NoAmplification   |
| blaOKP                   | 2C |       |       |      | NoAmplification   |
| blaOXA1/blaC             | 2C |       |       |      | NoAmplification   |
| blaOXA10-01              | 2C |       |       |      | CurveFitFailed    |
| blaOXA10-02              | 2C |       |       |      | NoAmplification   |
| blaOXY                   | 2C | 38.98 | 78.77 | 1.62 | MultipleMeltPeaks |
| blaPAO                   | 2C |       |       |      | NoAmplification   |
| blaPER                   | 2C | 35.99 | 73.96 | 1.84 |                   |
| blaPSE                   | 2C |       |       |      | NoAmplification   |
| blaROB                   | 2C |       |       |      | NoAmplification   |
| blaSFO                   | 2C | 32.77 | 89.57 | 1.89 | MultipleMeltPeaks |
| blaSHV-01                | 2C | 36.04 | 87.55 | 1.69 | MultipleMeltPeaks |
| blaSHV-02                | 2C |       |       |      | CurveFitFailed    |
| blaTEM                   | 2C |       |       |      | NoAmplification   |
| blaTLA                   | 2C |       |       |      | NoAmplification   |
| blaVEB                   | 2C |       |       |      | NoAmplification   |
| blaVIM                   | 2C |       |       |      | NoAmplification   |
| blaZ                     | 2C |       |       |      | NoAmplification   |
| carB                     | 2C |       |       |      | NoAmplification   |
| catA1                    | 2C |       |       |      | NoAmplification   |
| catB3                    | 2C |       |       |      | NoAmplification   |
| catB8                    | 2C | 29.47 | 82.82 | 1.94 |                   |

|            |    |       |       |      |                              |
|------------|----|-------|-------|------|------------------------------|
| ceoA       | 2C | 28.69 | 82.37 | 1.95 |                              |
| cepA       | 2C |       |       |      | NoAmplification              |
| cfiA       | 2C |       |       |      | NoAmplification              |
| cfr        | 2C |       |       |      | NoAmplification              |
| cfxA       | 2C | 27.15 | 77.63 | 2.07 |                              |
| cmeA       | 2C | 39.95 | 75.45 | 1.69 | MultipleMeltPeaks            |
| cmlA1-01   | 2C |       |       |      | NoAmplification              |
| cmlA1-02   | 2C |       |       |      | NoAmplification              |
| cmr        | 2C |       |       |      | CurveFitFailed               |
| cmx(A)     | 2C | 28.42 | 86.62 | 1.94 |                              |
| cphA-01    | 2C | 31.96 | 85.75 | 1.92 |                              |
| cphA-02    | 2C | 34.53 | 82.53 | 1.87 |                              |
| dfrA1      | 2C |       |       |      | NoAmplification              |
| dfrA12     | 2C |       |       |      | CurveFitFailed               |
| emrD       | 2C | 31.24 | 87.15 | 1.93 |                              |
| ereA       | 2C | 40.71 | 79.2  | 1.61 |                              |
| ereB       | 2C | 36.25 | 61.94 | 1.63 | MultipleMeltPeaks            |
| erm(34)    | 2C |       |       |      | NoAmplification              |
| erm(35)    | 2C |       |       |      | NoAmplification              |
| erm(36)    | 2C | 34.45 | 87.59 | 1.82 |                              |
| ermA       | 2C |       |       |      | NoAmplification              |
| ermA/ermTR | 2C |       |       |      | NoAmplification              |
| ermB       | 2C | 26.07 | 75.05 | 2.07 |                              |
| ermC       | 2C | 37.97 | 61.23 | 1.88 | MultipleMeltPeaks            |
| ermF       | 2C |       |       |      | NoAmplification              |
| ermJ/ermD  | 2C |       |       |      | NoAmplification              |
| ermK-01    | 2C |       |       |      | CurveFitFailed               |
| ermK-02    | 2C | 34.21 | 82.54 | 1.79 | MultipleMeltPeaks            |
| ermT-01    | 2C |       |       |      | NoAmplification              |
| ermT-02    | 2C |       |       |      | CurveFitFailed               |
| ermX       | 2C | 32.93 | 83.75 | 1.86 | MultipleMeltPeaks            |
| ermY       | 2C |       |       |      | NoAmplification              |
| fabK       | 2C | 20.07 | 77.88 | 2.16 |                              |
| floR       | 2C |       |       |      | NoAmplification              |
| folA       | 2C | 37.52 | 84    | 1.79 |                              |
| fosB       | 2C |       |       |      | LowEfficiency, CtIsSmall, S: |
| fosX       | 2C |       |       |      | NoAmplification              |
| fox5       | 2C | 28.75 | 87.18 | 1.95 |                              |
| imiR       | 2C |       |       |      | CurveFitFailed               |
| ImrA-01    | 2C | 37.76 | 79.59 | 1.82 | MultipleMeltPeaks            |
| intl       | 2C | 29.51 | 81.52 | 1.93 | MultipleMeltPeaks            |
| intl1      | 2C | 22.43 | 87.1  | 2.01 | MultipleMeltPeaks            |
| IS613      | 2C |       |       |      | NoAmplification              |
| lnuA-01    | 2C |       |       |      | NoAmplification              |
| lnuB-01    | 2C |       |       |      | NoAmplification              |
| lnuB-02    | 2C |       |       |      | NoAmplification              |

|                |    |       |       |      |                   |
|----------------|----|-------|-------|------|-------------------|
| lnuC           | 2C | 32    | 84.29 | 1.87 |                   |
| marR-01        | 2C | 33.31 | 85.2  | 1.91 |                   |
| matA/mel       | 2C | 27.93 | 77.46 | 2.02 |                   |
| mdet1          | 2C |       |       |      | CurveFitFailed    |
| mdtA           | 2C |       |       |      | NoAmplification   |
| mdtE/yhiU      | 2C |       |       |      | NoAmplification   |
| mecA           | 2C |       |       |      | NoAmplification   |
| mefA           | 2C | 26.2  | 80.54 | 1.94 |                   |
| mepA           | 2C | 30.06 | 76.42 | 2.04 | MultipleMeltPeaks |
| mexA           | 2C |       |       |      | NoAmplification   |
| mexD           | 2C | 35.08 | 79.64 | 2.02 | MultipleMeltPeaks |
| mexE           | 2C |       |       |      | NoAmplification   |
| mexF           | 2C | 30.73 | 87.31 | 2.01 | MultipleMeltPeaks |
| mphA-01        | 2C | 34.31 | 80.16 | 1.93 | MultipleMeltPeaks |
| mphA-02        | 2C | 31.67 | 77    | 1.6  | MultipleMeltPeaks |
| mphB           | 2C |       |       |      | CurveFitFailed    |
| mphC           | 2C | 37.95 | 80.02 | 1.59 | MultipleMeltPeaks |
| msrA-01        | 2C |       |       |      | NoAmplification   |
| msrC-01        | 2C |       |       |      | NoAmplification   |
| mtrC-01        | 2C |       |       |      | NoAmplification   |
| mtrC-02        | 2C | 29.41 | 84.69 | 1.97 |                   |
| mtrD-02        | 2C | 27.1  | 81.67 | 2.03 | MultipleMeltPeaks |
| mtrD-03        | 2C | 32.06 | 84.01 | 1.84 |                   |
| NDM1           | 2C | 38.73 | 79.84 | 1.84 |                   |
| nimE           | 2C | 32.84 | 76.16 | 2.02 |                   |
| nisB           | 2C | 30.88 | 76.13 | 2.01 |                   |
| oleC           | 2C |       |       |      | NoAmplification   |
| oprD           | 2C | 29.59 | 83.58 | 1.99 |                   |
| oprJ           | 2C |       |       |      | NoAmplification   |
| pbp            | 2C |       |       |      | NoAmplification   |
| pbp2x          | 2C | 20.07 | 75.84 | 2.09 |                   |
| Pbp5           | 2C |       |       |      | NoAmplification   |
| penA           | 2C | 35.07 | 85.65 | 1.75 |                   |
| pikR1          | 2C | 38.9  | 80.74 | 1.76 |                   |
| pikR2          | 2C | 36.53 | 83.01 | 1.73 | MultipleMeltPeaks |
| pmrA           | 2C | 20.27 | 80.28 | 2.07 |                   |
| pncA           | 2C | 38.79 | 78.91 | 1.77 | MultipleMeltPeaks |
| putative multi | 2C | 35.38 | 71.51 | 1.9  | MultipleMeltPeaks |
| qac            | 2C |       |       |      | CurveFitFailed    |
| qacA           | 2C | 31.67 | 70.75 | 1.83 |                   |
| qacA/qacB      | 2C |       |       |      | CurveFitFailed    |
| qacEdelta1-0   | 2C |       |       |      | NoAmplification   |
| qacEdelta1-0   | 2C | 30.83 | 81.24 | 2.02 | MultipleMeltPeaks |
| qacH-01        | 2C |       |       |      | NoAmplification   |
| qacH-02        | 2C | 35.65 | 83.62 | 1.62 |                   |
| qnrA           | 2C | 35.76 | 78.73 | 1.88 | MultipleMeltPeaks |



|              |    |       |       |      |                           |
|--------------|----|-------|-------|------|---------------------------|
| rarD-02      | 2C |       |       |      | NoAmplification           |
| sat4         | 2C |       |       |      | NoAmplification           |
| sdeB         | 2C |       |       |      | NoAmplification           |
| spcN-01      | 2C |       |       |      | NoAmplification           |
| speA         | 2C |       |       |      | NoAmplification           |
| str          | 2C |       |       |      | NoAmplification           |
| strA         | 2C |       |       |      | NoAmplification           |
| strB         | 2C |       |       |      | NoAmplification           |
| sul1         | 2C | 31.68 | 88.82 | 1.83 |                           |
| sul2         | 2C |       |       |      | NoAmplification           |
| sulA/foIP-01 | 2C | 19.43 | 81.74 | 1.97 |                           |
| sulA/foIP-03 | 2C | 20.33 | 83.2  | 1.97 |                           |
| tet(32)      | 2C |       |       |      | NoAmplification           |
| tet(34)      | 2C | 26.56 | 76.48 | 2.06 |                           |
| tet(35)      | 2C |       |       |      | NoAmplification           |
| tet(36)-A    | 2C |       |       |      | NoAmplification           |
| tet(36)-B    | 2C |       |       |      | NoAmplification           |
| tet(37)      | 2C | 28.61 | 75.98 | 1.99 | MultipleMeltPeaks         |
| tetA-01      | 2C | 34.81 | 85.15 | 1.81 |                           |
| tetA-02      | 2C | 36.67 | 82.08 | 1.86 |                           |
| tetB-01      | 2C | 33.12 | 88.13 | 1.87 |                           |
| tetB-02      | 2C | 33.89 | 83.54 | 1.87 | MultipleMeltPeaks         |
| tetC-01      | 2C |       |       |      | NoAmplification           |
| tetC-02      | 2C |       |       |      | NoAmplification           |
| tetD-01      | 2C |       |       |      | NoAmplification           |
| tetD-02      | 2C |       |       |      | CurveFitFailed            |
| tetE         | 2C |       |       |      | NoAmplification           |
| tetG-01      | 2C | 35.13 | 82.26 | 1.86 |                           |
| tetG-02      | 2C |       |       |      | CurveFitFailed            |
| tetH         | 2C |       |       |      | NoAmplification           |
| tetJ         | 2C |       |       |      | NoAmplification           |
| tetK         | 2C |       |       |      | NoAmplification           |
| tetL-01      | 2C |       |       |      | NoAmplification           |
| tetL-02      | 2C | 35.07 | 78.28 | 1.87 | MultipleMeltPeaks         |
| tetM-01      | 2C | 25.06 | 76.04 | 1.98 |                           |
| tetM-02      | 2C | 26.9  | 77.66 | 1.97 |                           |
| tetO-01      | 2C | 27.83 | 61.62 | 1.62 | SaturationBaselineRatiosL |
| tetPA        | 2C |       |       |      | NoAmplification           |
| tetPB-01     | 2C |       |       |      | NoAmplification           |
| tetPB-02     | 2C | 32.14 | 85.07 | 1.93 |                           |
| tetPB-03     | 2C |       |       |      | NoAmplification           |
| tetPB-05     | 2C |       |       |      | NoAmplification           |
| tetQ         | 2C |       |       |      | NoAmplification           |
| tetR-02      | 2C | 35.43 | 85.18 | 1.79 | MultipleMeltPeaks         |
| tetR-03      | 2C |       |       |      | NoAmplification           |
| tetS         | 2C |       |       |      | CurveFitFailed            |

|             |    |       |       |      |                            |
|-------------|----|-------|-------|------|----------------------------|
| tetT        | 2C |       |       |      | NoAmplification            |
| tetU-01     | 2C |       |       |      | NoAmplification            |
| tetV        | 2C |       |       |      | NoAmplification            |
| tetW-01     | 2C | 28.44 | 81.62 | 1.97 |                            |
| tetX        | 2C |       |       |      | NoAmplification            |
| tnpA-01     | 2C |       |       |      | NoAmplification            |
| tnpA-02     | 2C | 34.89 | 84.9  | 1.72 | MultipleMeltPeaks          |
| tnpA-03     | 2C | 39.89 | 73.88 | 1.87 |                            |
| tnpA-04     | 2C |       |       |      | NoAmplification            |
| tnpA-05     | 2C | 38.17 | 77.14 | 1.69 | MultipleMeltPeaks          |
| tnpA-07     | 2C |       |       |      | NoAmplification            |
| tolC-01     | 2C | 34.99 | 80.12 | 1.84 |                            |
| tolC-02     | 2C | 30.66 | 85.54 | 1.95 |                            |
| tolC-03     | 2C | 34.05 | 84.16 | 1.89 |                            |
| Tp614       | 2C | 33.24 | 77.43 | 1.95 | MultipleMeltPeaks          |
| ttgA        | 2C | 36.3  | 82.2  | 3.33 | BadR2, HighEfficiency, Mul |
| ttgB        | 2C | 38.14 | 75.61 | 1.77 | MultipleMeltPeaks          |
| vanA        | 2C |       |       |      | NoAmplification            |
| vanB-01     | 2C | 36.43 | 81.07 | 1.8  |                            |
| vanC-01     | 2C |       |       |      | CurveFitFailed             |
| vanC-02     | 2C |       |       |      | NoAmplification            |
| vanC-03     | 2C | 28.49 | 86.19 | 1.89 |                            |
| vanC1       | 2C |       |       |      | NoAmplification            |
| vanC2/vanC3 | 2C |       |       |      | CurveFitFailed             |
| vanG        | 2C |       |       |      | NoAmplification            |
| vanHB       | 2C |       |       |      | NoAmplification            |
| vanHD       | 2C | 35.73 | 81.07 | 1.86 |                            |
| vanRA-01    | 2C |       |       |      | NoAmplification            |
| vanRA-02    | 2C |       |       |      | CurveFitFailed             |
| vanRB       | 2C | 30.61 | 87.52 | 1.87 |                            |
| vanRC       | 2C |       |       |      | NoAmplification            |
| vanRC4      | 2C |       |       |      | NoAmplification            |
| vanRD       | 2C |       |       |      | NoAmplification            |
| vanSA       | 2C |       |       |      | NoAmplification            |
| vanSB       | 2C | 28.41 | 74.92 | 2.08 |                            |
| vanSC-01    | 2C | 34.17 | 84.07 | 1.92 |                            |
| vanSC-02    | 2C |       |       |      | NoAmplification            |
| vanTC-01    | 2C |       |       |      | NoAmplification            |
| vanTC-02    | 2C | 38.33 | 86.16 | 1.61 | MultipleMeltPeaks          |
| vanTE       | 2C |       |       |      | NoAmplification            |
| vanTG       | 2C |       |       |      | NoAmplification            |
| vanWB       | 2C |       |       |      | NoAmplification            |
| vanWG       | 2C |       |       |      | NoAmplification            |
| vanXA       | 2C |       |       |      | CurveFitFailed             |
| vanXB       | 2C |       |       |      | NoAmplification            |
| vanXD       | 2C | 28.61 | 76.41 | 2.1  |                            |

|              |    |       |       |      |                   |
|--------------|----|-------|-------|------|-------------------|
| vanYB        | 2C |       |       |      | CurveFitFailed    |
| vanYD-01     | 2C | 39.07 | 80.83 | 1.65 |                   |
| vanYD-02     | 2C |       |       |      | NoAmplification   |
| vatB-01      | 2C |       |       |      | NoAmplification   |
| vatB-02      | 2C |       |       |      | NoAmplification   |
| vatC-01      | 2C |       |       |      | CurveFitFailed    |
| vatC-02      | 2C |       |       |      | CurveFitFailed    |
| vatE-01      | 2C | 26.15 | 77.84 | 2.1  |                   |
| vatE-02      | 2C |       |       |      | NoAmplification   |
| vgaA-01      | 2C |       |       |      | NoAmplification   |
| vgaA-02      | 2C |       |       |      | CurveFitFailed    |
| vgb-01       | 2C |       |       |      | CurveFitFailed    |
| vgbB-01      | 2C | 37.44 | 76.28 | 1.7  |                   |
| vgbB-02      | 2C |       |       |      | NoAmplification   |
| yceE/mdtG-0  | 2C |       |       |      | CurveFitFailed    |
| yceE/mdtG-0  | 2C | 38.87 | 81.21 | 1.76 |                   |
| yceL/mdtH-0  | 2C | 30.51 | 86.33 | 1.89 |                   |
| yceL/mdtH-0  | 2C | 38.34 | 80.38 | 1.77 | MultipleMeltPeaks |
| yceL/mdtH-0  | 2C | 34.42 | 76.5  | 1.97 | MultipleMeltPeaks |
| yidY/mdtL-01 | 2C | 30.1  | 83.34 | 1.95 |                   |
| yidY/mdtL-02 | 2C | 38.33 | 74.78 | 1.76 | MultipleMeltPeaks |































| Assay          | Sample | Ct | Tm    | Efficiency | flag                         |
|----------------|--------|----|-------|------------|------------------------------|
| 16S rRNA       | 3A     |    | 16.74 | 81.87      | 2.05                         |
| aac            | 3A     |    | 29.68 | 80.81      | 1.87 MultipleMeltPeaks       |
| aac(6')-Ib(akz | 3A     |    |       |            | CurveFitFailed               |
| aac(6')-Ib(akz | 3A     |    | 30.18 | 89.24      | 1.95                         |
| aac(6')-Ib(akz | 3A     |    | 31.36 | 76.15      | 2 MultipleMeltPeaks          |
| aac(6')-II     | 3A     |    | 31.47 | 85.47      | 1.81                         |
| aac(6')I1      | 3A     |    | 36.47 | 88.73      | 1.78                         |
| aacA/aphD      | 3A     |    |       |            | BadR2, LowEfficiency, CtIsS  |
| aacC           | 3A     |    | 32.44 | 87.68      | 1.91 MultipleMeltPeaks       |
| aacC1          | 3A     |    | 31.76 | 92.32      | 1.87                         |
| aacC2          | 3A     |    | 39.06 | 78.17      | 1.75 MultipleMeltPeaks       |
| aacC4          | 3A     |    | 31.72 | 83.65      | 1.9 MultipleMeltPeaks        |
| aadA-01        | 3A     |    | 38.91 | 85.07      | 1.78 MultipleMeltPeaks       |
| aadA-02        | 3A     |    | 34.36 | 80.46      | 1.94                         |
| aadA-1-01      | 3A     |    | 33.32 | 81.72      | 1.92                         |
| aadA-1-02      | 3A     |    |       |            | BadR2, LowEfficiency, CtIsS  |
| aadA1          | 3A     |    | 33.1  | 83.71      | 2.01                         |
| aadA2-01       | 3A     |    | 36.84 | 87.13      | 1.68 MultipleMeltPeaks       |
| aadA2-02       | 3A     |    | 31.89 | 75.48      | 2.01                         |
| aadA2-03       | 3A     |    |       |            | LowEfficiency, CtIsSmall, Ci |
| aadA5-01       | 3A     |    | 32.22 | 88.83      | 1.92                         |
| aadA5-02       | 3A     |    | 31.93 | 87.45      | 1.98 MultipleMeltPeaks       |
| aadA9-01       | 3A     |    | 35.7  | 83.68      | 1.81 MultipleMeltPeaks       |
| aadA9-02       | 3A     |    | 37.78 | 73.54      | 1.98 MultipleMeltPeaks       |
| aadD           | 3A     |    |       |            | NoAmplification              |
| aadE           | 3A     |    |       |            | CurveFitFailed               |
| acrA-01        | 3A     |    | 25.85 | 88.91      | 1.95                         |
| acrA-02        | 3A     |    | 32.62 | 84.79      | 1.84 MultipleMeltPeaks       |
| acrA-03        | 3A     |    | 34.04 | 88.53      | 1.79 MultipleMeltPeaks       |
| acrA-04        | 3A     |    | 28.96 | 89.02      | 1.98 MultipleMeltPeaks       |
| acrA-05        | 3A     |    | 27.93 | 90.96      | 1.98                         |
| acrB-01        | 3A     |    | 31.06 | 86.28      | 1.97                         |
| acrF           | 3A     |    | 25.54 | 84.58      | 1.85                         |
| acrR-01        | 3A     |    | 31.57 | 90.36      | 1.95 MultipleMeltPeaks       |
| acrR-02        | 3A     |    | 32.2  | 85.35      | 1.9                          |
| Actin          | 3A     |    | 20.87 | 86.85      | 1.97                         |
| adeA           | 3A     |    | 36.1  | 83.33      | 1.9 MultipleMeltPeaks        |
| ampC-01        | 3A     |    | 31.79 | 84.96      | 2                            |
| ampC-02        | 3A     |    | 37.41 | 77.14      | 1.89 MultipleMeltPeaks       |
| ampC-04        | 3A     |    | 31.02 | 83.92      | 1.6 MultipleMeltPeaks        |
| ampC-05        | 3A     |    |       |            | NoAmplification              |
| ampC-06        | 3A     |    |       |            | LowEfficiency, CtIsSmall, S: |
| ampC-07        | 3A     |    | 34.18 | 83.28      | 1.86                         |
| ampC-09        | 3A     |    |       |            | CurveFitFailed               |
| ampC/blaDH     | 3A     |    | 28.05 | 84.93      | 1.98 MultipleMeltPeaks       |

|                            |    |       |       |      |                              |
|----------------------------|----|-------|-------|------|------------------------------|
| aph                        | 3A |       |       |      | LowEfficiency, CtIsSmall, S: |
| aph(2')-Id-01              | 3A |       |       |      | LowEfficiency, CtIsSmall, C: |
| aph(2')-Id-02              | 3A |       |       |      | CurveFitFailed               |
| aph6ia                     | 3A | 35.45 | 76.19 | 1.94 | MultipleMeltPeaks            |
| aphA1(aka k <sub>z</sub> ) | 3A |       |       |      | LowEfficiency, CtIsSmall, S: |
| bacA-01                    | 3A | 35.19 | 90.87 | 1.78 |                              |
| bacA-02                    | 3A | 34.4  | 86.43 | 1.82 | MultipleMeltPeaks            |
| BETA-globin                | 3A | 22.39 | 84.12 | 1.99 |                              |
| bla-ACC-1                  | 3A | 33.3  | 82.98 | 1.93 | MultipleMeltPeaks            |
| bla-L1                     | 3A | 28.8  | 84.83 | 1.95 | MultipleMeltPeaks            |
| bla1                       | 3A |       |       |      | LowEfficiency, CtIsSmall, S: |
| blaCMY                     | 3A | 32.07 | 80.43 | 1.91 | MultipleMeltPeaks            |
| blaCMY2-01                 | 3A | 33.9  | 82.32 | 1.96 | MultipleMeltPeaks            |
| blaCMY2-02                 | 3A | 28.29 | 85.48 | 2.03 |                              |
| blaCTX-M-01                | 3A | 38.42 | 76.35 | 1.74 | MultipleMeltPeaks            |
| blaCTX-M-02                | 3A | 28.7  | 84.85 | 1.96 | MultipleMeltPeaks            |
| blaCTX-M-03                | 3A | 35.88 | 83.58 | 1.9  |                              |
| blaCTX-M-04                | 3A | 31.07 | 90.44 | 2.07 | MultipleMeltPeaks            |
| blaCTX-M-05                | 3A | 32.63 | 76.7  | 1.83 |                              |
| blaCTX-M-06                | 3A |       |       |      | NoAmplification              |
| blaGES                     | 3A |       |       |      | NoAmplification              |
| blaIMP-01                  | 3A |       |       |      | NoAmplification              |
| blaIMP-02                  | 3A | 34.32 | 82.06 | 1.91 |                              |
| blaMOX/blaC                | 3A | 42.78 | 81.89 | 1.66 |                              |
| blaOCH                     | 3A |       |       |      | NoAmplification              |
| blaOKP                     | 3A |       |       |      | NoAmplification              |
| blaOXA1/blaC               | 3A |       |       |      | CurveFitFailed               |
| blaOXA10-01                | 3A |       |       |      | LowEfficiency, CtIsSmall, C: |
| blaOXA10-02                | 3A |       |       |      | LowEfficiency, CtIsSmall, S: |
| blaOXY                     | 3A | 32.18 | 91.02 | 1.87 |                              |
| blaPAO                     | 3A | 38.03 | 63.22 | 1.93 | MultipleMeltPeaks            |
| blaPER                     | 3A | 36.05 | 70.1  | 1.65 | MultipleMeltPeaks            |
| blaPSE                     | 3A | 36.25 | 78.1  | 1.78 | MultipleMeltPeaks            |
| blaROB                     | 3A |       |       |      | NoAmplification              |
| blaSFO                     | 3A | 29.06 | 89.89 | 1.93 |                              |
| blaSHV-01                  | 3A | 25.89 | 88.84 | 2.03 |                              |
| blaSHV-02                  | 3A | 36.3  | 79.56 | 1.91 |                              |
| blaTEM                     | 3A | 23.62 | 79.3  | 2.01 |                              |
| blaTLA                     | 3A |       |       |      | LowEfficiency, CtIsSmall, C: |
| blaVEB                     | 3A |       |       |      | NoAmplification              |
| blaVIM                     | 3A | 36.79 | 88.84 | 1.84 |                              |
| blaZ                       | 3A |       |       |      | LowEfficiency, CtIsSmall, C: |
| carB                       | 3A | 37.07 | 83.41 | 1.9  | MultipleMeltPeaks            |
| catA1                      | 3A |       |       |      | NoAmplification              |
| catB3                      | 3A | 35.45 | 79.53 | 1.84 | MultipleMeltPeaks            |
| catB8                      | 3A | 27.8  | 82.55 | 1.97 |                              |

|            |    |       |       |                              |
|------------|----|-------|-------|------------------------------|
| ceoA       | 3A | 27.61 | 82.35 | 1.98                         |
| cepA       | 3A | 39.34 | 83.01 | 1.8 MultipleMeltPeaks        |
| cfiA       | 3A | 27.99 | 88.03 | 2.11                         |
| cfr        | 3A |       |       | LowEfficiency, CtIsSmall, S: |
| cfxA       | 3A | 22.14 | 77.8  | 2.09                         |
| cmeA       | 3A | 35.98 | 82.01 | 1.81                         |
| cmlA1-01   | 3A | 31.2  | 89.55 | 1.95                         |
| cmlA1-02   | 3A | 36    | 89.77 | 1.85                         |
| cmr        | 3A | 36.91 | 78.68 | 1.87                         |
| cmx(A)     | 3A | 26.55 | 86.71 | 2.01                         |
| cphA-01    | 3A | 29.68 | 85.18 | 2 MultipleMeltPeaks          |
| cphA-02    | 3A | 31.88 | 82.71 | 1.93                         |
| dfrA1      | 3A | 36.27 | 79.96 | 1.86                         |
| dfrA12     | 3A | 33.4  | 85.92 | 1.76                         |
| emrD       | 3A | 31.45 | 91    | 1.88                         |
| ereA       | 3A | 35.23 | 83.52 | 1.89                         |
| ereB       | 3A | 34.8  | 75.92 | 1.93 MultipleMeltPeaks       |
| erm(34)    | 3A | 35.16 | 80.06 | 1.95 MultipleMeltPeaks       |
| erm(35)    | 3A |       |       | LowEfficiency, CtIsSmall, Ci |
| erm(36)    | 3A | 30.72 | 84.38 | 2.02                         |
| ermA       | 3A | 37.02 | 74.33 | 1.93                         |
| ermA/ermTR | 3A | 27.81 | 75.89 | 2.03                         |
| ermB       | 3A | 21.79 | 75.05 | 2.13                         |
| ermC       | 3A |       |       | CurveFitFailed               |
| ermF       | 3A | 22.16 | 74.9  | 2.01                         |
| ermJ/ermD  | 3A |       |       | LowEfficiency, CtIsSmall, S: |
| ermK-01    | 3A | 34.17 | 89.21 | 1.95                         |
| ermK-02    | 3A | 30.89 | 88.34 | 1.9                          |
| ermT-01    | 3A |       |       | LowEfficiency, CtIsSmall, Ci |
| ermT-02    | 3A | 30.13 | 78.64 | 2.05                         |
| ermX       | 3A | 20.98 | 83.95 | 1.95                         |
| ermY       | 3A |       |       | LowEfficiency, CtIsSmall, S: |
| fabK       | 3A | 21.47 | 79    | 2.19                         |
| floR       | 3A | 36.32 | 89.84 | 1.8 MultipleMeltPeaks        |
| folA       | 3A |       |       | NoAmplification              |
| fosB       | 3A |       |       | LowEfficiency, CtIsSmall, S: |
| fosX       | 3A |       |       | LowEfficiency, CtIsSmall, S: |
| fox5       | 3A | 25.86 | 87.91 | 1.99                         |
| imiR       | 3A |       |       | CurveFitFailed               |
| ImrA-01    | 3A | 34.27 | 80    | 1.98                         |
| intl       | 3A | 26.82 | 85.79 | 1.99 MultipleMeltPeaks       |
| intl1      | 3A | 19.62 | 87.1  | 2.02                         |
| IS613      | 3A | 24.16 | 79.65 | 2.09                         |
| lnuA-01    | 3A |       |       | LowEfficiency, CtIsSmall, S: |
| lnuB-01    | 3A |       |       | CurveFitFailed               |
| lnuB-02    | 3A |       |       | NoAmplification              |

|                |    |       |       |                              |
|----------------|----|-------|-------|------------------------------|
| lnuC           | 3A | 30.16 | 88.32 | 1.84                         |
| marR-01        | 3A | 32.7  | 85.46 | 1.91                         |
| matA/mel       | 3A | 20.25 | 77.77 | 2.07                         |
| mdet1          | 3A |       |       | NoAmplification              |
| mdtA           | 3A | 34.4  | 81.83 | 1.75 MultipleMeltPeaks       |
| mdtE/yhiU      | 3A | 31.21 | 85.34 | 1.81                         |
| mecA           | 3A |       |       | LowEfficiency, CtIsSmall, S: |
| mefA           | 3A | 19.49 | 80.52 | 1.98 MultipleMeltPeaks       |
| mepA           | 3A | 28.66 | 87.5  | 2                            |
| mexA           | 3A | 35.84 | 85.51 | 1.81                         |
| mexD           | 3A | 32.76 | 83.69 | 1.99                         |
| mexE           | 3A | 26.86 | 83.64 | 1.95                         |
| mexF           | 3A | 26.22 | 86.98 | 2.14 MultipleMeltPeaks       |
| mphA-01        | 3A | 28.56 | 91.22 | 1.97                         |
| mphA-02        | 3A | 26.73 | 87.87 | 2.2                          |
| mphB           | 3A | 37.38 | 79.71 | 1.71 MultipleMeltPeaks       |
| mphC           | 3A | 33.98 | 86.41 | 1.81                         |
| msrA-01        | 3A |       |       | NoAmplification              |
| msrC-01        | 3A |       |       | NoAmplification              |
| mtrC-01        | 3A | 37.16 | 77.87 | 1.86 MultipleMeltPeaks       |
| mtrC-02        | 3A | 29.98 | 84.13 | 2.02 MultipleMeltPeaks       |
| mtrD-02        | 3A | 25.47 | 82.28 | 1.97                         |
| mtrD-03        | 3A | 27.84 | 82.41 | 1.97 MultipleMeltPeaks       |
| NDM1           | 3A |       |       | CurveFitFailed               |
| nimE           | 3A | 34.66 | 85.65 | 2.05                         |
| nisB           | 3A | 29.86 | 81.96 | 1.97 MultipleMeltPeaks       |
| oleC           | 3A | 35.8  | 87.08 | 1.88 MultipleMeltPeaks       |
| oprD           | 3A | 26.94 | 86.85 | 2                            |
| oprJ           | 3A | 28.63 | 91.41 | 1.9                          |
| pbp            | 3A | 37.57 | 79.66 | 1.76 MultipleMeltPeaks       |
| pbp2x          | 3A | 21.82 | 75.7  | 2.06                         |
| Pbp5           | 3A |       |       | LowEfficiency, CtIsSmall, S: |
| penA           | 3A | 33.41 | 87.98 | 1.87 MultipleMeltPeaks       |
| pikR1          | 3A | 33.21 | 86.01 | 1.95 MultipleMeltPeaks       |
| pikR2          | 3A | 31.83 | 84.41 | 1.99                         |
| pmrA           | 3A | 21.99 | 80.07 | 2.11                         |
| pncA           | 3A | 29.47 | 84.77 | 1.91 MultipleMeltPeaks       |
| putative multi | 3A | 31.57 | 83.94 | 1.97                         |
| qac            | 3A | 37.6  | 75.5  | 1.84 MultipleMeltPeaks       |
| qacA           | 3A |       |       | CurveFitFailed               |
| qacA/qacB      | 3A | 37    | 85    | 1.54 MultipleMeltPeaks       |
| qacEdelta1-0   | 3A |       |       | CurveFitFailed               |
| qacEdelta1-0   | 3A | 30.19 | 88.2  | 2 MultipleMeltPeaks          |
| qacH-01        | 3A | 29.69 | 87.67 | 2.03                         |
| qacH-02        | 3A | 32.96 | 83.94 | 1.67                         |
| qnrA           | 3A | 35.97 | 84.36 | 1.89                         |

|              |    |       |       |      |                              |
|--------------|----|-------|-------|------|------------------------------|
| rarD-02      | 3A | 33.27 | 85.76 | 2.02 | MultipleMeltPeaks            |
| sat4         | 3A |       |       |      | BadR2, LowEfficiency, CtIsS  |
| sdeB         | 3A |       |       |      | CurveFitFailed               |
| spcN-01      | 3A | 37.6  | 67.18 | 1.99 | MultipleMeltPeaks            |
| speA         | 3A |       |       |      | NoAmplification              |
| str          | 3A |       |       |      | NoAmplification              |
| strA         | 3A |       |       |      | CurveFitFailed               |
| strB         | 3A | 28.63 | 83.98 | 1.94 |                              |
| sul1         | 3A | 30.81 | 89.98 | 2.06 |                              |
| sul2         | 3A |       |       |      | CurveFitFailed               |
| sulA/foIP-01 | 3A | 20.3  | 81.56 | 2.01 |                              |
| sulA/foIP-03 | 3A | 21.34 | 82.91 | 2.01 |                              |
| tet(32)      | 3A | 25.57 | 81.42 | 1.99 |                              |
| tet(34)      | 3A | 28.2  | 76.27 | 2.04 |                              |
| tet(35)      | 3A |       |       |      | NoAmplification              |
| tet(36)-A    | 3A | 34.59 | 81.92 | 1.89 |                              |
| tet(36)-B    | 3A | 36.82 | 78.48 | 2.38 |                              |
| tet(37)      | 3A | 24.06 | 76.27 | 2    | MultipleMeltPeaks            |
| tetA-01      | 3A | 29.43 | 85.26 | 1.91 |                              |
| tetA-02      | 3A | 36.83 | 87.07 | 1.79 |                              |
| tetB-01      | 3A | 25.08 | 86.26 | 2    | MultipleMeltPeaks            |
| tetB-02      | 3A | 24.23 | 79.91 | 1.99 |                              |
| tetC-01      | 3A | 25.81 | 75.42 | 2.02 |                              |
| tetC-02      | 3A | 25.84 | 76.21 | 2.05 |                              |
| tetD-01      | 3A |       |       |      | CurveFitFailed               |
| tetD-02      | 3A | 32.84 | 81.42 | 2.08 | MultipleMeltPeaks            |
| tetE         | 3A |       |       |      | NoAmplification              |
| tetG-01      | 3A | 30.95 | 81.89 | 2    | MultipleMeltPeaks            |
| tetG-02      | 3A | 32.68 | 91.43 | 1.94 | MultipleMeltPeaks            |
| tetH         | 3A |       |       |      | NoAmplification              |
| tetJ         | 3A |       |       |      | LowEfficiency, CtIsSmall, Ci |
| tetK         | 3A |       |       |      | CurveFitFailed               |
| tetL-01      | 3A | 34.92 | 80.92 | 1.78 |                              |
| tetL-02      | 3A | 31.56 | 85.46 | 1.83 |                              |
| tetM-01      | 3A | 20.12 | 76.2  | 2.04 |                              |
| tetM-02      | 3A | 20.26 | 77.9  | 2.05 |                              |
| tetO-01      | 3A | 24.2  | 77.14 | 2.04 |                              |
| tetPA        | 3A |       |       |      | NoAmplification              |
| tetPB-01     | 3A | 37.34 | 83.5  | 1.87 |                              |
| tetPB-02     | 3A | 28.32 | 85.08 | 2.03 |                              |
| tetPB-03     | 3A |       |       |      | CurveFitFailed               |
| tetPB-05     | 3A |       |       |      | CurveFitFailed               |
| tetQ         | 3A | 23.13 | 76.77 | 2.05 |                              |
| tetR-02      | 3A | 29.51 | 89.45 | 1.89 |                              |
| tetR-03      | 3A | 24.83 | 76.27 | 2.01 |                              |
| tetS         | 3A |       |       |      | CtIsSmall, SaturationBaseli  |

|             |    |       |       |      |                              |
|-------------|----|-------|-------|------|------------------------------|
| tetT        | 3A |       |       |      | NoAmplification              |
| tetU-01     | 3A |       |       |      | LowEfficiency, CtIsSmall, C  |
| tetV        | 3A |       |       |      | CurveFitFailed               |
| tetW-01     | 3A | 25.23 | 81.98 | 2.01 |                              |
| tetX        | 3A | 35.68 | 81.32 | 1.82 |                              |
| tnpA-01     | 3A |       |       |      | LowEfficiency, CtIsSmall, S: |
| tnpA-02     | 3A | 31.89 | 85.92 | 1.79 |                              |
| tnpA-03     | 3A | 28.86 | 77.86 | 2.17 |                              |
| tnpA-04     | 3A | 29.39 | 82.41 | 1.94 |                              |
| tnpA-05     | 3A | 28.57 | 81.02 | 1.97 |                              |
| tnpA-07     | 3A |       |       |      | BadR2, LowEfficiency, CtIsS  |
| tolC-01     | 3A | 33.14 | 86.4  | 1.88 | MultipleMeltPeaks            |
| tolC-02     | 3A | 27.18 | 87.63 | 1.98 | MultipleMeltPeaks            |
| tolC-03     | 3A | 27.98 | 86.61 | 1.97 | MultipleMeltPeaks            |
| Tp614       | 3A | 32.42 | 83.85 | 1.97 | MultipleMeltPeaks            |
| ttgA        | 3A | 37.67 | 86.72 | 1.89 | MultipleMeltPeaks            |
| ttgB        | 3A | 33.04 | 88.48 | 1.95 |                              |
| vanA        | 3A |       |       |      | NoAmplification              |
| vanB-01     | 3A | 32.33 | 84.5  | 2.06 |                              |
| vanC-01     | 3A | 36.34 | 76.53 | 1.97 |                              |
| vanC-02     | 3A |       |       |      | CurveFitFailed               |
| vanC-03     | 3A | 24.95 | 85.95 | 1.95 |                              |
| vanC1       | 3A |       |       |      | CurveFitFailed               |
| vanC2/vanC3 | 3A | 31.1  | 84.52 | 2.08 |                              |
| vanG        | 3A |       |       |      | BadR2, CtIsSmall, Saturatio  |
| vanHB       | 3A | 37.73 | 82.75 | 1.76 | MultipleMeltPeaks            |
| vanHD       | 3A | 33.48 | 88.38 | 1.93 | MultipleMeltPeaks            |
| vanRA-01    | 3A |       |       |      | LowEfficiency, CtIsSmall, C  |
| vanRA-02    | 3A |       |       |      | NoAmplification              |
| vanRB       | 3A | 31.09 | 87.64 | 1.94 |                              |
| vanRC       | 3A |       |       |      | LowEfficiency, CtIsSmall, S: |
| vanRC4      | 3A |       |       |      | LowEfficiency, CtIsSmall, S: |
| vanRD       | 3A |       |       |      | BadR2, CtIsSmall, Saturatio  |
| vanSA       | 3A |       |       |      | LowEfficiency, CtIsSmall, S: |
| vanSB       | 3A | 28.03 | 75.21 | 2.08 |                              |
| vanSC-01    | 3A | 32.36 | 84.23 | 2    |                              |
| vanSC-02    | 3A |       |       |      | NoAmplification              |
| vanTC-01    | 3A |       |       |      | LowEfficiency, CtIsSmall, S: |
| vanTC-02    | 3A | 34.24 | 86.64 | 1.77 |                              |
| vanTE       | 3A | 33.87 | 88.64 | 1.86 |                              |
| vanTG       | 3A |       |       |      | BadR2, CtIsSmall, Saturatio  |
| vanWB       | 3A |       |       |      | LowEfficiency, CtIsSmall, S: |
| vanWG       | 3A |       |       |      | LowEfficiency, CtIsSmall, S: |
| vanXA       | 3A |       |       |      | CurveFitFailed               |
| vanXB       | 3A |       |       |      | LowEfficiency, CtIsSmall, S: |
| vanXD       | 3A | 28.47 | 76.19 | 2.12 |                              |

|              |    |       |       |      |                   |
|--------------|----|-------|-------|------|-------------------|
| vanYB        | 3A | 35.29 | 81.15 | 1.9  | MultipleMeltPeaks |
| vanYD-01     | 3A | 32.05 | 82.38 | 1.82 | MultipleMeltPeaks |
| vanYD-02     | 3A |       |       |      | CurveFitFailed    |
| vatB-01      | 3A |       |       |      | CurveFitFailed    |
| vatB-02      | 3A | 30.88 | 75.72 | 2.11 |                   |
| vatC-01      | 3A | 35.99 | 81.19 | 1.83 |                   |
| vatC-02      | 3A | 35.74 | 83.15 | 1.86 | MultipleMeltPeaks |
| vatE-01      | 3A | 26.32 | 77.85 | 2.11 |                   |
| vatE-02      | 3A |       |       |      | NoAmplification   |
| vgaA-01      | 3A |       |       |      | CurveFitFailed    |
| vgaA-02      | 3A |       |       |      | CurveFitFailed    |
| vgb-01       | 3A | 31    | 90.34 | 1.95 | MultipleMeltPeaks |
| vgbB-01      | 3A | 36.67 | 75.99 | 1.76 | MultipleMeltPeaks |
| vgbB-02      | 3A |       |       |      | NoAmplification   |
| yceE/mdtG-0  | 3A | 32.94 | 77.45 | 2.12 |                   |
| yceE/mdtG-0  | 3A | 35.08 | 81.13 | 1.91 |                   |
| yceL/mdtH-0  | 3A | 28.74 | 86.34 | 1.88 |                   |
| yceL/mdtH-0  | 3A |       |       |      | CurveFitFailed    |
| yceL/mdtH-0  | 3A | 29.96 | 87.49 | 1.98 |                   |
| yidY/mdtL-01 | 3A | 28    | 88.66 | 1.94 |                   |
| yidY/mdtL-02 | 3A | 33.08 | 92.88 | 1.89 |                   |































| Assay          | Sample | Ct | Tm    | Efficiency | flag                   |
|----------------|--------|----|-------|------------|------------------------|
| 16S rRNA       | 3B     |    | 17.44 | 81.25      | 2.04                   |
| aac            | 3B     |    | 31.43 | 81.57      | 1.63 MultipleMeltPeaks |
| aac(6')-Ib(akz | 3B     |    | 37.7  | 80.96      | 1.88                   |
| aac(6')-Ib(akz | 3B     |    | 30.33 | 86.35      | 1.95                   |
| aac(6')-Ib(akz | 3B     |    | 33.46 | 86.26      | 1.92 MultipleMeltPeaks |
| aac(6')-II     | 3B     |    | 35.75 | 80.87      | 1.7 MultipleMeltPeaks  |
| aac(6')I1      | 3B     |    |       |            | NoAmplification        |
| aacA/aphD      | 3B     |    |       |            | NoAmplification        |
| aacC           | 3B     |    | 31.49 | 87.07      | 1.95 MultipleMeltPeaks |
| aacC1          | 3B     |    |       |            | NoAmplification        |
| aacC2          | 3B     |    |       |            | NoAmplification        |
| aacC4          | 3B     |    | 34.22 | 85.56      | 1.89                   |
| aadA-01        | 3B     |    | 38.04 | 62.4       | 1.89 MultipleMeltPeaks |
| aadA-02        | 3B     |    | 34.44 | 80.49      | 1.93                   |
| aadA-1-01      | 3B     |    | 36.34 | 81.74      | 1.87                   |
| aadA-1-02      | 3B     |    |       |            | NoAmplification        |
| aadA1          | 3B     |    | 32.85 | 77.77      | 1.95 MultipleMeltPeaks |
| aadA2-01       | 3B     |    | 37.43 | 89.47      | 1.71                   |
| aadA2-02       | 3B     |    | 32.67 | 75.49      | 2.01                   |
| aadA2-03       | 3B     |    | 36.17 | 77.35      | 1.87                   |
| aadA5-01       | 3B     |    | 30.71 | 88.85      | 1.9                    |
| aadA5-02       | 3B     |    | 32.85 | 88.64      | 1.98 MultipleMeltPeaks |
| aadA9-01       | 3B     |    | 36.26 | 84.72      | 1.72                   |
| aadA9-02       | 3B     |    | 36.48 | 78.54      | 1.88 MultipleMeltPeaks |
| aadD           | 3B     |    |       |            | NoAmplification        |
| aadE           | 3B     |    |       |            | CurveFitFailed         |
| acrA-01        | 3B     |    | 30.36 | 89.06      | 1.9                    |
| acrA-02        | 3B     |    | 32.16 | 87.16      | 1.91                   |
| acrA-03        | 3B     |    |       |            | NoAmplification        |
| acrA-04        | 3B     |    | 29.29 | 80.85      | 1.98                   |
| acrA-05        | 3B     |    | 29.48 | 87.21      | 1.96 MultipleMeltPeaks |
| acrB-01        | 3B     |    | 37.22 | 75.19      | 1.86                   |
| acrF           | 3B     |    | 26.71 | 82.93      | 1.84                   |
| acrR-01        | 3B     |    | 32.54 | 89.92      | 1.94                   |
| acrR-02        | 3B     |    | 33.14 | 86.44      | 1.91 MultipleMeltPeaks |
| Actin          | 3B     |    | 22.33 | 86.9       | 1.96 MultipleMeltPeaks |
| adeA           | 3B     |    | 35.99 | 86.27      | 1.83                   |
| ampC-01        | 3B     |    | 31.7  | 88.61      | 1.97 MultipleMeltPeaks |
| ampC-02        | 3B     |    | 38.57 | 82.89      | 1.8                    |
| ampC-04        | 3B     |    | 32.05 | 78.66      | 1.91                   |
| ampC-05        | 3B     |    |       |            | NoAmplification        |
| ampC-06        | 3B     |    |       |            | CurveFitFailed         |
| ampC-07        | 3B     |    | 34.77 | 88.64      | 1.81                   |
| ampC-09        | 3B     |    | 38.65 | 86.32      | 1.69 MultipleMeltPeaks |
| ampC/blaDH     | 3B     |    | 28.93 | 84.67      | 1.98 MultipleMeltPeaks |

|                            |    |       |       |      |                   |
|----------------------------|----|-------|-------|------|-------------------|
| aph                        | 3B |       |       |      | NoAmplification   |
| aph(2')-Id-01              | 3B |       |       |      | NoAmplification   |
| aph(2')-Id-02              | 3B |       |       |      | NoAmplification   |
| aph6ia                     | 3B | 37.57 | 79.08 | 1.91 |                   |
| aphA1(aka k <sub>z</sub> ) | 3B |       |       |      | NoAmplification   |
| bacA-01                    | 3B | 37.75 | 83.15 | 1.8  |                   |
| bacA-02                    | 3B | 34.56 | 87.93 | 1.78 | MultipleMeltPeaks |
| BETA-globin                | 3B | 23.8  | 84.08 | 1.98 |                   |
| bla-ACC-1                  | 3B | 37.89 | 85.92 | 1.75 |                   |
| bla-L1                     | 3B | 29.41 | 85.51 | 1.96 |                   |
| bla1                       | 3B |       |       |      | NoAmplification   |
| blaCMY                     | 3B | 36.74 | 80.47 | 1.84 | MultipleMeltPeaks |
| blaCMY2-01                 | 3B | 38.8  | 77.06 | 1.76 | MultipleMeltPeaks |
| blaCMY2-02                 | 3B | 27.58 | 89.54 | 1.97 |                   |
| blaCTX-M-01                | 3B | 34.92 | 76.39 | 1.99 |                   |
| blaCTX-M-02                | 3B | 29.25 | 83.56 | 1.91 | MultipleMeltPeaks |
| blaCTX-M-03                | 3B |       |       |      | NoAmplification   |
| blaCTX-M-04                | 3B | 35.79 | 82.56 | 1.78 | MultipleMeltPeaks |
| blaCTX-M-05                | 3B | 39.41 | 75.18 | 1.59 |                   |
| blaCTX-M-06                | 3B |       |       |      | NoAmplification   |
| blaGES                     | 3B |       |       |      | NoAmplification   |
| blaIMP-01                  | 3B |       |       |      | NoAmplification   |
| blaIMP-02                  | 3B | 37.5  | 76.08 | 1.83 | MultipleMeltPeaks |
| blaMOX/blaC                | 3B | 32.8  | 82.09 | 1.98 |                   |
| blaOCH                     | 3B |       |       |      | NoAmplification   |
| blaOKP                     | 3B |       |       |      | NoAmplification   |
| blaOXA1/blaC               | 3B |       |       |      | NoAmplification   |
| blaOXA10-01                | 3B |       |       |      | NoAmplification   |
| blaOXA10-02                | 3B |       |       |      | CurveFitFailed    |
| blaOXY                     | 3B | 35.8  | 88.24 | 1.68 | MultipleMeltPeaks |
| blaPAO                     | 3B | 37.48 | 84.91 | 1.85 |                   |
| blaPER                     | 3B | 37.18 | 69.85 | 1.58 | MultipleMeltPeaks |
| blaPSE                     | 3B |       |       |      | NoAmplification   |
| blaROB                     | 3B |       |       |      | NoAmplification   |
| blaSFO                     | 3B | 29.98 | 89.93 | 1.9  |                   |
| blaSHV-01                  | 3B | 29.5  | 88.22 | 2.08 |                   |
| blaSHV-02                  | 3B | 32.85 | 81.97 | 1.94 |                   |
| blaTEM                     | 3B | 37.47 | 83.75 | 1.81 | MultipleMeltPeaks |
| blaTLA                     | 3B |       |       |      | NoAmplification   |
| blaVEB                     | 3B |       |       |      | NoAmplification   |
| blaVIM                     | 3B | 34.03 | 81.83 | 1.88 | MultipleMeltPeaks |
| blaZ                       | 3B |       |       |      | NoAmplification   |
| carB                       | 3B |       |       |      | NoAmplification   |
| catA1                      | 3B |       |       |      | NoAmplification   |
| catB3                      | 3B | 31.37 | 87.57 | 1.91 |                   |
| catB8                      | 3B | 30.04 | 81.06 | 1.87 |                   |

|            |    |       |       |      |                              |
|------------|----|-------|-------|------|------------------------------|
| ceoA       | 3B | 28.38 | 82.31 | 1.94 | MultipleMeltPeaks            |
| cepA       | 3B | 38.15 | 83.1  | 1.85 |                              |
| cfiA       | 3B | 28.29 | 87.94 | 2.04 |                              |
| cfr        | 3B |       |       |      | NoAmplification              |
| cfxA       | 3B | 27.01 | 77.73 | 2.08 |                              |
| cmeA       | 3B |       |       |      | CurveFitFailed               |
| cmlA1-01   | 3B | 36.81 | 80.16 | 1.76 | MultipleMeltPeaks            |
| cmlA1-02   | 3B | 37.65 | 79.8  | 1.86 | MultipleMeltPeaks            |
| cmr        | 3B | 37.63 | 78.75 | 1.78 |                              |
| cmx(A)     | 3B | 26.73 | 84.48 | 1.95 | MultipleMeltPeaks            |
| cphA-01    | 3B | 30.27 | 86.43 | 1.98 |                              |
| cphA-02    | 3B | 30.84 | 82.73 | 1.9  |                              |
| dfrA1      | 3B | 35.29 | 83.66 | 1.88 |                              |
| dfrA12     | 3B | 35.45 | 86.05 | 1.71 |                              |
| emrD       | 3B | 34.83 | 80.64 | 1.84 | MultipleMeltPeaks            |
| ereA       | 3B | 37.41 | 82.81 | 1.85 |                              |
| ereB       | 3B | 32.1  | 87.89 | 1.89 |                              |
| erm(34)    | 3B |       |       |      | NoAmplification              |
| erm(35)    | 3B |       |       |      | NoAmplification              |
| erm(36)    | 3B | 30.7  | 89.4  | 2.01 |                              |
| ermA       | 3B |       |       |      | NoAmplification              |
| ermA/ermTR | 3B |       |       |      | NoAmplification              |
| ermB       | 3B | 28.84 | 75.05 | 2.08 |                              |
| ermC       | 3B | 42.98 | 85.53 | 1.66 | MultipleMeltPeaks            |
| ermF       | 3B |       |       |      | NoAmplification              |
| ermJ/ermD  | 3B |       |       |      | NoAmplification              |
| ermK-01    | 3B | 37.52 | 73.77 | 1.88 |                              |
| ermK-02    | 3B | 33.55 | 86.66 | 1.86 |                              |
| ermT-01    | 3B |       |       |      | NoAmplification              |
| ermT-02    | 3B | 37.65 | 75.23 | 1.84 |                              |
| ermX       | 3B | 30.56 | 88.74 | 1.88 |                              |
| ermY       | 3B |       |       |      | NoAmplification              |
| fabK       | 3B | 24.66 | 79.5  | 2.11 |                              |
| floR       | 3B |       |       |      | NoAmplification              |
| folA       | 3B | 36.73 | 88.27 | 1.76 |                              |
| fosB       | 3B |       |       |      | LowEfficiency, CtIsSmall, S: |
| fosX       | 3B |       |       |      | NoAmplification              |
| fox5       | 3B | 26.55 | 88.1  | 1.98 |                              |
| imiR       | 3B |       |       |      | CurveFitFailed               |
| ImrA-01    | 3B | 35.54 | 82.45 | 1.94 |                              |
| intl       | 3B | 27.24 | 84.47 | 1.98 | MultipleMeltPeaks            |
| intl1      | 3B | 20.52 | 87.26 | 1.99 |                              |
| IS613      | 3B | 33    | 78.59 | 2.06 |                              |
| lnuA-01    | 3B |       |       |      | NoAmplification              |
| lnuB-01    | 3B |       |       |      | NoAmplification              |
| lnuB-02    | 3B |       |       |      | CurveFitFailed               |

|               |    |       |       |      |                   |
|---------------|----|-------|-------|------|-------------------|
| lnuC          | 3B | 29.73 | 84.05 | 1.86 | MultipleMeltPeaks |
| marR-01       | 3B |       |       |      | CurveFitFailed    |
| matA/mel      | 3B | 23.2  | 77.67 | 2.03 |                   |
| mdetI1        | 3B |       |       |      | NoAmplification   |
| mdtA          | 3B | 34.07 | 77.12 | 1.84 | MultipleMeltPeaks |
| mdtE/yhiU     | 3B | 33.74 | 77.97 | 2.07 |                   |
| mecA          | 3B |       |       |      | NoAmplification   |
| mefA          | 3B | 22.65 | 80.5  | 1.94 |                   |
| mepA          | 3B | 32.09 | 84.82 | 1.98 |                   |
| mexA          | 3B | 39.02 | 81.92 | 1.66 | MultipleMeltPeaks |
| mexD          | 3B | 35.72 | 76.73 | 1.84 | MultipleMeltPeaks |
| mexE          | 3B | 36.85 | 81.11 | 1.83 |                   |
| mexF          | 3B | 27.22 | 87.27 | 2.04 |                   |
| mphA-01       | 3B | 31.37 | 87.64 | 1.83 |                   |
| mphA-02       | 3B | 28.21 | 86.86 | 2.05 |                   |
| mphB          | 3B | 39.57 | 76.45 | 1.8  |                   |
| mphC          | 3B | 38.13 | 76.54 | 1.65 | MultipleMeltPeaks |
| msrA-01       | 3B | 34.95 | 83.42 | 1.87 |                   |
| msrC-01       | 3B |       |       |      | NoAmplification   |
| mtrC-01       | 3B | 35.78 | 82.86 | 1.85 |                   |
| mtrC-02       | 3B | 30.14 | 84.38 | 1.94 |                   |
| mtrD-02       | 3B | 26.98 | 85.9  | 1.98 |                   |
| mtrD-03       | 3B | 30.25 | 83.63 | 1.97 |                   |
| NDM1          | 3B |       |       |      | NoAmplification   |
| nimE          | 3B | 38.34 | 85.1  | 1.89 | MultipleMeltPeaks |
| nisB          | 3B | 33.42 | 82.07 | 1.97 |                   |
| oleC          | 3B | 35.15 | 84.24 | 1.86 |                   |
| oprD          | 3B | 27.05 | 86.36 | 1.97 | MultipleMeltPeaks |
| oprJ          | 3B | 34.31 | 88.13 | 1.89 |                   |
| pbp           | 3B | 36.37 | 82.7  | 1.88 |                   |
| pbp2x         | 3B | 27.38 | 75.09 | 2.04 |                   |
| Pbp5          | 3B |       |       |      | NoAmplification   |
| penA          | 3B | 31.42 | 88.03 | 1.86 |                   |
| pikR1         | 3B | 37.61 | 83.14 | 1.8  |                   |
| pikR2         | 3B | 30.16 | 84.67 | 1.95 |                   |
| pmrA          | 3B | 26.56 | 79.28 | 2.1  |                   |
| pncA          | 3B | 31.05 | 90.41 | 1.82 |                   |
| putative mult | 3B | 30.25 | 84.6  | 1.97 |                   |
| qac           | 3B | 33.78 | 84.53 | 1.91 | MultipleMeltPeaks |
| qacA          | 3B | 32.43 | 70.94 | 1.81 |                   |
| qacA/qacB     | 3B | 38.69 | 83.5  | 1.47 | MultipleMeltPeaks |
| qacEdelta1-0  | 3B |       |       |      | NoAmplification   |
| qacEdelta1-0  | 3B | 29.61 | 91.01 | 2.02 |                   |
| qacH-01       | 3B | 30.28 | 86.74 | 1.95 |                   |
| qacH-02       | 3B | 33.13 | 83.74 | 1.67 |                   |
| qnrA          | 3B | 43.06 | 73.71 | 1.7  | MultipleMeltPeaks |



|              |    |       |       |      |                   |
|--------------|----|-------|-------|------|-------------------|
| rarD-02      | 3B | 37.7  | 83.16 | 1.75 |                   |
| sat4         | 3B |       |       |      | NoAmplification   |
| sdeB         | 3B | 39.14 | 75.08 | 1.87 |                   |
| spcN-01      | 3B | 37.22 | 85.96 | 1.79 |                   |
| speA         | 3B |       |       |      | NoAmplification   |
| str          | 3B |       |       |      | NoAmplification   |
| strA         | 3B |       |       |      | NoAmplification   |
| strB         | 3B | 34.45 | 84.36 | 1.92 |                   |
| sul1         | 3B | 30.92 | 90.01 | 1.99 |                   |
| sul2         | 3B |       |       |      | NoAmplification   |
| sulA/foIP-01 | 3B | 27.22 | 81.67 | 1.98 |                   |
| sulA/foIP-03 | 3B | 25.41 | 83.6  | 2.02 |                   |
| tet(32)      | 3B | 29.87 | 81.09 | 1.96 |                   |
| tet(34)      | 3B | 27.82 | 76.4  | 2.05 |                   |
| tet(35)      | 3B | 38.92 | 76.09 | 1.72 | MultipleMeltPeaks |
| tet(36)-A    | 3B |       |       |      | NoAmplification   |
| tet(36)-B    | 3B |       |       |      | NoAmplification   |
| tet(37)      | 3B | 32.84 | 79.48 | 1.94 | MultipleMeltPeaks |
| tetA-01      | 3B | 31.01 | 85.26 | 1.88 |                   |
| tetA-02      | 3B | 32.13 | 90.94 | 1.83 |                   |
| tetB-01      | 3B | 32.11 | 86.63 | 1.93 |                   |
| tetB-02      | 3B | 32.86 | 83.34 | 1.9  |                   |
| tetC-01      | 3B |       |       |      | NoAmplification   |
| tetC-02      | 3B | 37.4  | 75.72 | 1.89 |                   |
| tetD-01      | 3B |       |       |      | NoAmplification   |
| tetD-02      | 3B | 35.54 | 76.59 | 2.05 |                   |
| tetE         | 3B | 37.88 | 84.58 | 1.97 |                   |
| tetG-01      | 3B | 30.94 | 85.42 | 1.96 | MultipleMeltPeaks |
| tetG-02      | 3B | 32.45 | 85.35 | 1.9  |                   |
| tetH         | 3B |       |       |      | NoAmplification   |
| tetJ         | 3B |       |       |      | NoAmplification   |
| tetK         | 3B |       |       |      | NoAmplification   |
| tetL-01      | 3B | 37.97 | 79.59 | 1.71 | MultipleMeltPeaks |
| tetL-02      | 3B | 33.68 | 85.44 | 1.78 |                   |
| tetM-01      | 3B | 23.16 | 75.91 | 1.98 |                   |
| tetM-02      | 3B | 23.78 | 77.82 | 1.99 |                   |
| tetO-01      | 3B | 28.42 | 77.14 | 2.03 |                   |
| tetPA        | 3B |       |       |      | NoAmplification   |
| tetPB-01     | 3B | 35.04 | 82.26 | 1.86 |                   |
| tetPB-02     | 3B | 30.28 | 85.11 | 2    |                   |
| tetPB-03     | 3B |       |       |      | NoAmplification   |
| tetPB-05     | 3B |       |       |      | NoAmplification   |
| tetQ         | 3B | 35.62 | 76.86 | 1.96 |                   |
| tetR-02      | 3B | 31.47 | 90.72 | 1.88 |                   |
| tetR-03      | 3B |       |       |      | NoAmplification   |
| tetS         | 3B | 33.56 | 85.32 | 2    |                   |

|             |    |       |       |      |                             |
|-------------|----|-------|-------|------|-----------------------------|
| tetT        | 3B |       |       |      | CurveFitFailed              |
| tetU-01     | 3B |       |       |      | NoAmplification             |
| tetV        | 3B | 37.97 | 73.99 | 2.15 | MultipleMeltPeaks           |
| tetW-01     | 3B | 26.67 | 82.13 | 1.99 |                             |
| tetX        | 3B |       |       |      | NoAmplification             |
| tnpA-01     | 3B | 36.3  | 80.68 | 1.92 |                             |
| tnpA-02     | 3B | 31.75 | 90.73 | 1.78 | MultipleMeltPeaks           |
| tnpA-03     | 3B | 29.16 | 78    | 2.09 |                             |
| tnpA-04     | 3B | 31.9  | 75.15 | 1.35 | MultipleMeltPeaks           |
| tnpA-05     | 3B | 35.81 | 82.91 | 1.74 |                             |
| tnpA-07     | 3B |       |       |      | NoAmplification             |
| tolC-01     | 3B | 37.64 | 80.16 | 1.75 |                             |
| tolC-02     | 3B | 28.28 | 87.65 | 2    |                             |
| tolC-03     | 3B | 29.73 | 85.14 | 1.9  |                             |
| Tp614       | 3B | 30.06 | 73.23 | 1.97 | MultipleMeltPeaks           |
| ttgA        | 3B | 37.9  | 78.27 | 1.71 | MultipleMeltPeaks           |
| ttgB        | 3B | 33.77 | 80.66 | 1.97 | MultipleMeltPeaks           |
| vanA        | 3B |       |       |      | NoAmplification             |
| vanB-01     | 3B | 33.27 | 84.04 | 1.98 |                             |
| vanC-01     | 3B |       |       |      | NoAmplification             |
| vanC-02     | 3B |       |       |      | NoAmplification             |
| vanC-03     | 3B | 25.28 | 86.37 | 1.96 | MultipleMeltPeaks           |
| vanC1       | 3B |       |       |      | NoAmplification             |
| vanC2/vanC3 | 3B | 34.17 | 84.91 | 1.98 | MultipleMeltPeaks           |
| vanG        | 3B |       |       |      | NoAmplification             |
| vanHB       | 3B |       |       |      | NoAmplification             |
| vanHD       | 3B | 32.49 | 89.07 | 1.94 |                             |
| vanRA-01    | 3B |       |       |      | NoAmplification             |
| vanRA-02    | 3B |       |       |      | NoAmplification             |
| vanRB       | 3B | 30.7  | 87.68 | 1.93 |                             |
| vanRC       | 3B |       |       |      | NoAmplification             |
| vanRC4      | 3B |       |       |      | NoAmplification             |
| vanRD       | 3B |       |       |      | NoAmplification             |
| vanSA       | 3B |       |       |      | NoAmplification             |
| vanSB       | 3B | 29.5  | 75.06 | 2.06 |                             |
| vanSC-01    | 3B | 34.75 | 82.74 | 1.75 | MultipleMeltPeaks           |
| vanSC-02    | 3B |       |       |      | NoAmplification             |
| vanTC-01    | 3B |       |       |      | NoAmplification             |
| vanTC-02    | 3B | 35.46 | 86.35 | 1.7  | MultipleMeltPeaks           |
| vanTE       | 3B |       |       |      | CurveFitFailed              |
| vanTG       | 3B |       |       |      | NoAmplification             |
| vanWB       | 3B |       |       |      | NoAmplification             |
| vanWG       | 3B | 35.01 | 76.04 | 1.95 |                             |
| vanXA       | 3B |       |       |      | LowEfficiency, CurveFitFail |
| vanXB       | 3B |       |       |      | NoAmplification             |
| vanXD       | 3B | 28.76 | 76.46 | 2.09 |                             |

|              |    |       |       |      |                   |
|--------------|----|-------|-------|------|-------------------|
| vanYB        | 3B | 38.2  | 82.68 | 1.9  | MultipleMeltPeaks |
| vanYD-01     | 3B | 31.06 | 82.8  | 1.8  |                   |
| vanYD-02     | 3B | 36.54 | 74.42 | 1.91 |                   |
| vatB-01      | 3B |       |       |      | NoAmplification   |
| vatB-02      | 3B | 38.23 | 81.47 | 1.82 |                   |
| vatC-01      | 3B | 35.54 | 81.21 | 1.83 |                   |
| vatC-02      | 3B | 32.96 | 83.2  | 1.91 | MultipleMeltPeaks |
| vatE-01      | 3B | 25.81 | 77.84 | 2.11 |                   |
| vatE-02      | 3B | 37.73 | 75.08 | 2.07 |                   |
| vgaA-01      | 3B |       |       |      | NoAmplification   |
| vgaA-02      | 3B | 37.43 | 82.28 | 1.86 | MultipleMeltPeaks |
| vgb-01       | 3B | 36.01 | 82.22 | 1.79 | MultipleMeltPeaks |
| vgbB-01      | 3B | 35    | 82.39 | 1.79 |                   |
| vgbB-02      | 3B |       |       |      | NoAmplification   |
| yceE/mdtG-0  | 3B |       |       |      | CurveFitFailed    |
| yceE/mdtG-0  | 3B | 36.27 | 81.48 | 1.84 |                   |
| yceL/mdtH-0  | 3B | 28.99 | 82.2  | 1.93 | MultipleMeltPeaks |
| yceL/mdtH-0  | 3B |       |       |      | NoAmplification   |
| yceL/mdtH-0  | 3B | 29.71 | 82.54 | 1.97 | MultipleMeltPeaks |
| yidY/mdtL-01 | 3B | 28.06 | 88.68 | 1.94 |                   |
| yidY/mdtL-02 | 3B | 37.7  | 76.75 | 1.86 |                   |































| Assay          | Sample | Ct | Tm    | Efficiency | flag                   |
|----------------|--------|----|-------|------------|------------------------|
| 16S rRNA       | 3C     |    | 17.35 | 81.98      | 2.06                   |
| aac            | 3C     |    | 29.49 | 88.76      | 1.57                   |
| aac(6')-Ib(akz | 3C     |    |       |            | NoAmplification        |
| aac(6')-Ib(akz | 3C     |    | 30.83 | 86.97      | 2.04                   |
| aac(6')-Ib(akz | 3C     |    | 31.79 | 88.39      | 1.79                   |
| aac(6')-II     | 3C     |    | 31.9  | 84.47      | 1.82 MultipleMeltPeaks |
| aac(6')I1      | 3C     |    | 35.23 | 89.08      | 1.86                   |
| aacA/aphD      | 3C     |    |       |            | NoAmplification        |
| aacC           | 3C     |    | 30.25 | 92.1       | 1.99                   |
| aacC1          | 3C     |    |       |            | NoAmplification        |
| aacC2          | 3C     |    |       |            | NoAmplification        |
| aacC4          | 3C     |    | 33.21 | 88.41      | 2.05                   |
| aadA-01        | 3C     |    |       |            | NoAmplification        |
| aadA-02        | 3C     |    | 35.33 | 80.29      | 1.9                    |
| aadA-1-01      | 3C     |    | 34.24 | 81.72      | 1.94                   |
| aadA-1-02      | 3C     |    |       |            | NoAmplification        |
| aadA1          | 3C     |    | 30.29 | 84.23      | 2.22                   |
| aadA2-01       | 3C     |    | 35.96 | 89.38      | 1.84                   |
| aadA2-02       | 3C     |    | 30.55 | 75.26      | 1.94                   |
| aadA2-03       | 3C     |    |       |            | NoAmplification        |
| aadA5-01       | 3C     |    | 30.57 | 88.83      | 1.86                   |
| aadA5-02       | 3C     |    | 30.93 | 88.49      | 2 MultipleMeltPeaks    |
| aadA9-01       | 3C     |    | 34.51 | 89.23      | 1.99 MultipleMeltPeaks |
| aadA9-02       | 3C     |    |       |            | NoAmplification        |
| aadD           | 3C     |    |       |            | NoAmplification        |
| aadE           | 3C     |    |       |            | NoAmplification        |
| acrA-01        | 3C     |    | 27.83 | 89.25      | 2.01                   |
| acrA-02        | 3C     |    | 32.8  | 87.76      | 2.02                   |
| acrA-03        | 3C     |    | 35.75 | 88.68      | 1.78                   |
| acrA-04        | 3C     |    | 28.81 | 80.84      | 1.91 MultipleMeltPeaks |
| acrA-05        | 3C     |    | 29.21 | 88.67      | 1.93                   |
| acrB-01        | 3C     |    |       |            | NoAmplification        |
| acrF           | 3C     |    | 24.31 | 82.91      | 1.76                   |
| acrR-01        | 3C     |    | 31.62 | 84.97      | 1.91 MultipleMeltPeaks |
| acrR-02        | 3C     |    | 30.99 | 87.15      | 2.04                   |
| Actin          | 3C     |    | 18.65 | 86.87      | 2.09                   |
| adeA           | 3C     |    | 33.98 | 88.01      | 1.91                   |
| ampC-01        | 3C     |    | 30.11 | 89.56      | 1.97                   |
| ampC-02        | 3C     |    | 33.29 | 86.78      | 2.08                   |
| ampC-04        | 3C     |    | 30.44 | 83.68      | 1.68 MultipleMeltPeaks |
| ampC-05        | 3C     |    |       |            | NoAmplification        |
| ampC-06        | 3C     |    |       |            | NoAmplification        |
| ampC-07        | 3C     |    | 31.24 | 88.67      | 1.85                   |
| ampC-09        | 3C     |    | 35.82 | 89.62      | 1.8                    |
| ampC/blaDH     | 3C     |    | 29.72 | 86.07      | 1.96 MultipleMeltPeaks |

|                            |    |       |       |      |                   |
|----------------------------|----|-------|-------|------|-------------------|
| aph                        | 3C |       |       |      | NoAmplification   |
| aph(2')-Id-01              | 3C |       |       |      | NoAmplification   |
| aph(2')-Id-02              | 3C |       |       |      | NoAmplification   |
| aph6ia                     | 3C |       |       |      | NoAmplification   |
| aphA1(aka k <sub>z</sub> ) | 3C |       |       |      | NoAmplification   |
| bacA-01                    | 3C | 36.01 | 87.28 | 1.88 | MultipleMeltPeaks |
| bacA-02                    | 3C | 32.34 | 88.11 | 2    |                   |
| BETA-globin                | 3C | 19.8  | 84.24 | 2.04 |                   |
| bla-ACC-1                  | 3C | 31.61 | 89.51 | 2.07 |                   |
| bla-L1                     | 3C | 28.88 | 85.56 | 2.06 | MultipleMeltPeaks |
| bla1                       | 3C |       |       |      | NoAmplification   |
| blaCMY                     | 3C | 35.01 | 86.87 | 1.88 | MultipleMeltPeaks |
| blaCMY2-01                 | 3C | 35.71 | 75.53 | 1.82 | MultipleMeltPeaks |
| blaCMY2-02                 | 3C | 26.38 | 89.14 | 2.07 | MultipleMeltPeaks |
| blaCTX-M-01                | 3C | 33.3  | 85.13 | 2.11 |                   |
| blaCTX-M-02                | 3C | 30.03 | 85.95 | 2.02 |                   |
| blaCTX-M-03                | 3C |       |       |      | NoAmplification   |
| blaCTX-M-04                | 3C | 31.39 | 86.17 | 1.88 |                   |
| blaCTX-M-05                | 3C | 33.11 | 89.49 | 1.67 |                   |
| blaCTX-M-06                | 3C |       |       |      | NoAmplification   |
| blaGES                     | 3C |       |       |      | NoAmplification   |
| blaIMP-01                  | 3C |       |       |      | NoAmplification   |
| blaIMP-02                  | 3C |       |       |      | NoAmplification   |
| blaMOX/blaC                | 3C | 34.84 | 81.54 | 1.99 |                   |
| blaOCH                     | 3C |       |       |      | NoAmplification   |
| blaOKP                     | 3C |       |       |      | NoAmplification   |
| blaOXA1/blaC               | 3C |       |       |      | NoAmplification   |
| blaOXA10-01                | 3C |       |       |      | NoAmplification   |
| blaOXA10-02                | 3C |       |       |      | NoAmplification   |
| blaOXY                     | 3C | 31.25 | 89.26 | 1.81 |                   |
| blaPAO                     | 3C |       |       |      | NoAmplification   |
| blaPER                     | 3C | 34.81 | 77.74 | 2.03 |                   |
| blaPSE                     | 3C | 34.72 | 87.19 | 1.94 |                   |
| blaROB                     | 3C | 35.43 | 85.27 | 1.88 |                   |
| blaSFO                     | 3C | 28.07 | 89.54 | 2    |                   |
| blaSHV-01                  | 3C |       |       |      | CurveFitFailed    |
| blaSHV-02                  | 3C | 32.24 | 84.08 | 1.83 |                   |
| blaTEM                     | 3C | 29.95 | 82.21 | 1.64 | MultipleMeltPeaks |
| blaTLA                     | 3C |       |       |      | NoAmplification   |
| blaVEB                     | 3C |       |       |      | NoAmplification   |
| blaVIM                     | 3C | 33.66 | 88.75 | 1.93 |                   |
| blaZ                       | 3C |       |       |      | NoAmplification   |
| carB                       | 3C |       |       |      | NoAmplification   |
| catA1                      | 3C |       |       |      | NoAmplification   |
| catB3                      | 3C | 31    | 87.47 | 2.03 |                   |
| catB8                      | 3C | 28.26 | 84.61 | 2.06 | MultipleMeltPeaks |

|            |    |       |       |      |                   |
|------------|----|-------|-------|------|-------------------|
| ceoA       | 3C | 28.4  | 89.18 | 2.01 | MultipleMeltPeaks |
| cepA       | 3C |       |       |      | NoAmplification   |
| cfiA       | 3C |       |       |      | NoAmplification   |
| cfr        | 3C |       |       |      | NoAmplification   |
| cfxA       | 3C | 27.4  | 77.52 | 1.98 |                   |
| cmeA       | 3C |       |       |      | NoAmplification   |
| cmlA1-01   | 3C | 36.32 | 80.43 | 2.02 | MultipleMeltPeaks |
| cmlA1-02   | 3C | 35.13 | 82.43 | 2.02 | MultipleMeltPeaks |
| cmr        | 3C |       |       |      | NoAmplification   |
| cmx(A)     | 3C | 26.2  | 86.85 | 2.12 | MultipleMeltPeaks |
| cphA-01    | 3C | 30.54 | 85.59 | 2.02 | MultipleMeltPeaks |
| cphA-02    | 3C | 31.08 | 82.56 | 1.92 |                   |
| dfrA1      | 3C | 31.7  | 78.32 | 1.89 |                   |
| dfrA12     | 3C | 33.38 | 86.14 | 1.98 | MultipleMeltPeaks |
| emrD       | 3C | 33.76 | 88.98 | 1.94 |                   |
| ereA       | 3C | 35.79 | 83.27 | 1.94 |                   |
| ereB       | 3C | 32.06 | 88.71 | 2.13 | MultipleMeltPeaks |
| erm(34)    | 3C |       |       |      | NoAmplification   |
| erm(35)    | 3C |       |       |      | NoAmplification   |
| erm(36)    | 3C | 30.37 | 85.67 | 1.46 | MultipleMeltPeaks |
| ermA       | 3C |       |       |      | NoAmplification   |
| ermA/ermTR | 3C | 32.83 | 87.7  | 1.91 |                   |
| ermB       | 3C |       |       |      | NoAmplification   |
| ermC       | 3C |       |       |      | NoAmplification   |
| ermF       | 3C |       |       |      | NoAmplification   |
| ermJ/ermD  | 3C |       |       |      | NoAmplification   |
| ermK-01    | 3C | 34.6  | 74.45 | 2.02 | MultipleMeltPeaks |
| ermK-02    | 3C | 30.89 | 86.26 | 1.92 | MultipleMeltPeaks |
| ermT-01    | 3C |       |       |      | NoAmplification   |
| ermT-02    | 3C |       |       |      | NoAmplification   |
| ermX       | 3C | 28.71 | 88.05 | 1.99 |                   |
| ermY       | 3C |       |       |      | NoAmplification   |
| fabK       | 3C | 22.74 | 79.16 | 2.12 |                   |
| floR       | 3C |       |       |      | NoAmplification   |
| folA       | 3C |       |       |      | NoAmplification   |
| fosB       | 3C |       |       |      | NoAmplification   |
| fosX       | 3C |       |       |      | NoAmplification   |
| fox5       | 3C | 25.52 | 87.93 | 1.96 |                   |
| imiR       | 3C |       |       |      | NoAmplification   |
| ImrA-01    | 3C | 33.87 | 87.89 | 1.95 |                   |
| intl       | 3C | 26.64 | 84.83 | 2.08 | MultipleMeltPeaks |
| intl1      | 3C | 19.22 | 87.58 | 2.15 |                   |
| IS613      | 3C |       |       |      | NoAmplification   |
| lnuA-01    | 3C |       |       |      | NoAmplification   |
| lnuB-01    | 3C |       |       |      | NoAmplification   |
| lnuB-02    | 3C |       |       |      | NoAmplification   |

|                |    |       |       |      |                   |
|----------------|----|-------|-------|------|-------------------|
| lnuC           | 3C | 30.18 | 87.54 | 1.76 |                   |
| marR-01        | 3C | 33.2  | 85.32 | 1.96 | MultipleMeltPeaks |
| matA/mel       | 3C | 20.46 | 77.49 | 2.07 |                   |
| mdetI1         | 3C |       |       |      | NoAmplification   |
| mdtA           | 3C | 34    | 81.85 | 1.98 | MultipleMeltPeaks |
| mdtE/yhiU      | 3C | 35    | 88.8  | 1.81 |                   |
| mecA           | 3C |       |       |      | NoAmplification   |
| mefA           | 3C | 19.97 | 80.49 | 2.01 |                   |
| mepA           | 3C | 31.01 | 85.85 | 1.82 | MultipleMeltPeaks |
| mexA           | 3C | 33.85 | 89.25 | 1.86 |                   |
| mexD           | 3C |       |       |      | NoAmplification   |
| mexE           | 3C | 33.74 | 83.46 | 1.92 |                   |
| mexF           | 3C | 25.94 | 87.37 | 2.49 |                   |
| mphA-01        | 3C | 27.53 | 87.56 | 2    | MultipleMeltPeaks |
| mphA-02        | 3C | 26.45 | 86.86 | 2.02 |                   |
| mphB           | 3C |       |       |      | NoAmplification   |
| mphC           | 3C | 31.83 | 85.97 | 1.98 |                   |
| msrA-01        | 3C |       |       |      | NoAmplification   |
| msrC-01        | 3C |       |       |      | NoAmplification   |
| mtrC-01        | 3C | 35.55 | 84.02 | 1.78 | MultipleMeltPeaks |
| mtrC-02        | 3C | 30.09 | 84.09 | 1.99 |                   |
| mtrD-02        | 3C | 25.41 | 82.45 | 1.85 | MultipleMeltPeaks |
| mtrD-03        | 3C | 29.87 | 89.83 | 1.93 |                   |
| NDM1           | 3C |       |       |      | NoAmplification   |
| nimE           | 3C | 32.83 | 88.51 | 1.88 |                   |
| nisB           | 3C | 31.57 | 82.33 | 1.84 |                   |
| oleC           | 3C | 37.24 | 86.62 | 1.79 | MultipleMeltPeaks |
| oprD           | 3C | 25.43 | 86.75 | 2.09 |                   |
| oprJ           | 3C | 34.21 | 87.16 | 1.89 | MultipleMeltPeaks |
| pbp            | 3C | 35.58 | 81.25 | 1.98 | MultipleMeltPeaks |
| pbp2x          | 3C | 23.31 | 74.71 | 1.77 |                   |
| Pbp5           | 3C |       |       |      | NoAmplification   |
| penA           | 3C | 30.95 | 86.38 | 1.76 | MultipleMeltPeaks |
| pikR1          | 3C | 35.46 | 82.14 | 1.95 | MultipleMeltPeaks |
| pikR2          | 3C | 28.46 | 85.05 | 2.18 |                   |
| pmrA           | 3C | 22.89 | 79.88 | 2.09 |                   |
| pncA           | 3C | 30.86 | 90.39 | 1.95 |                   |
| putative multi | 3C | 34.45 | 84.45 | 1.99 |                   |
| qac            | 3C | 36.71 | 86.59 | 1.81 | MultipleMeltPeaks |
| qacA           | 3C |       |       |      | NoAmplification   |
| qacA/qacB      | 3C | 34.02 | 86.97 | 1.55 | MultipleMeltPeaks |
| qacEdelta1-0   | 3C |       |       |      | NoAmplification   |
| qacEdelta1-0   | 3C | 25.57 | 85.48 | 1.84 | MultipleMeltPeaks |
| qacH-01        | 3C | 29.63 | 88.2  | 1.96 |                   |
| qacH-02        | 3C | 32.31 | 83.8  | 1.77 |                   |
| qnrA           | 3C |       |       |      | NoAmplification   |

|              |    |       |       |      |                   |
|--------------|----|-------|-------|------|-------------------|
| rarD-02      | 3C | 32.45 | 85.69 | 1.96 |                   |
| sat4         | 3C |       |       |      | NoAmplification   |
| sdeB         | 3C |       |       |      | NoAmplification   |
| spcN-01      | 3C | 35.41 | 84.99 | 1.97 |                   |
| speA         | 3C |       |       |      | NoAmplification   |
| str          | 3C |       |       |      | NoAmplification   |
| strA         | 3C |       |       |      | NoAmplification   |
| strB         | 3C | 33.23 | 79.1  | 1.99 |                   |
| sul1         | 3C | 28.6  | 90.02 | 2.14 |                   |
| sul2         | 3C |       |       |      | NoAmplification   |
| sulA/foIP-01 | 3C | 21.9  | 81.82 | 2.07 |                   |
| sulA/foIP-03 | 3C | 21.88 | 83.29 | 1.98 |                   |
| tet(32)      | 3C | 30.72 | 80.93 | 1.89 |                   |
| tet(34)      | 3C | 29.3  | 76.1  | 1.92 |                   |
| tet(35)      | 3C | 31.55 | 86.07 | 1.9  |                   |
| tet(36)-A    | 3C | 34.47 | 81.63 | 1.99 | MultipleMeltPeaks |
| tet(36)-B    | 3C |       |       |      | NoAmplification   |
| tet(37)      | 3C | 29.49 | 81.27 | 1.88 | MultipleMeltPeaks |
| tetA-01      | 3C | 29.16 | 85.23 | 1.92 |                   |
| tetA-02      | 3C | 34.78 | 87.89 | 1.91 |                   |
| tetB-01      | 3C | 29.83 | 88.55 | 2.03 |                   |
| tetB-02      | 3C | 33.83 | 80.74 | 1.85 |                   |
| tetC-01      | 3C |       |       |      | NoAmplification   |
| tetC-02      | 3C |       |       |      | NoAmplification   |
| tetD-01      | 3C |       |       |      | NoAmplification   |
| tetD-02      | 3C | 36.27 | 75.95 | 2.05 |                   |
| tetE         | 3C |       |       |      | NoAmplification   |
| tetG-01      | 3C | 29.35 | 85.27 | 2.08 | MultipleMeltPeaks |
| tetG-02      | 3C | 31.1  | 88.39 | 2.03 |                   |
| tetH         | 3C |       |       |      | NoAmplification   |
| tetJ         | 3C |       |       |      | NoAmplification   |
| tetK         | 3C | 30.26 | 71.96 | 2.05 |                   |
| tetL-01      | 3C |       |       |      | NoAmplification   |
| tetL-02      | 3C | 29.92 | 85.22 | 1.84 | MultipleMeltPeaks |
| tetM-01      | 3C | 19.92 | 75.5  | 2.01 |                   |
| tetM-02      | 3C | 20.18 | 77.61 | 2.16 |                   |
| tetO-01      | 3C | 24.77 | 76.87 | 2.08 |                   |
| tetPA        | 3C |       |       |      | NoAmplification   |
| tetPB-01     | 3C |       |       |      | NoAmplification   |
| tetPB-02     | 3C | 27.58 | 85.12 | 2.08 |                   |
| tetPB-03     | 3C |       |       |      | NoAmplification   |
| tetPB-05     | 3C |       |       |      | NoAmplification   |
| tetQ         | 3C | 27.39 | 75.55 | 2.03 |                   |
| tetR-02      | 3C | 28.95 | 89.99 | 1.92 |                   |
| tetR-03      | 3C |       |       |      | NoAmplification   |
| tetS         | 3C | 34.49 | 85.14 | 1.71 | MultipleMeltPeaks |

|             |    |       |       |      |                             |
|-------------|----|-------|-------|------|-----------------------------|
| tetT        | 3C |       |       |      | NoAmplification             |
| tetU-01     | 3C |       |       |      | NoAmplification             |
| tetV        | 3C |       |       |      | NoAmplification             |
| tetW-01     | 3C | 26.43 | 81.97 | 2.05 |                             |
| tetX        | 3C |       |       |      | NoAmplification             |
| tnpA-01     | 3C |       |       |      | NoAmplification             |
| tnpA-02     | 3C | 33.01 | 85.44 | 1.88 |                             |
| tnpA-03     | 3C |       |       |      | NoAmplification             |
| tnpA-04     | 3C | 30.96 | 82.31 | 1.84 |                             |
| tnpA-05     | 3C | 34.79 | 82.69 | 1.85 |                             |
| tnpA-07     | 3C |       |       |      | NoAmplification             |
| tolC-01     | 3C | 32.84 | 80.6  | 2.01 | MultipleMeltPeaks           |
| tolC-02     | 3C | 26.92 | 87.65 | 2.09 | MultipleMeltPeaks           |
| tolC-03     | 3C | 29.08 | 87.33 | 2.04 | MultipleMeltPeaks           |
| Tp614       | 3C | 32.35 | 84.18 | 1.94 |                             |
| ttgA        | 3C | 36.26 | 86.24 | 1.88 |                             |
| ttgB        | 3C | 31.95 | 84.45 | 1.96 | MultipleMeltPeaks           |
| vanA        | 3C |       |       |      | NoAmplification             |
| vanB-01     | 3C | 31.74 | 85.21 | 1.65 | MultipleMeltPeaks           |
| vanC-01     | 3C |       |       |      | NoAmplification             |
| vanC-02     | 3C |       |       |      | NoAmplification             |
| vanC-03     | 3C | 23.87 | 86.38 | 2.03 |                             |
| vanC1       | 3C |       |       |      | NoAmplification             |
| vanC2/vanC3 | 3C | 30.37 | 84.76 | 1.79 |                             |
| vanG        | 3C |       |       |      | NoAmplification             |
| vanHB       | 3C | 37.24 | 78.41 | 1.84 | MultipleMeltPeaks           |
| vanHD       | 3C | 33.08 | 85.57 | 1.93 |                             |
| vanRA-01    | 3C |       |       |      | NoAmplification             |
| vanRA-02    | 3C |       |       |      | NoAmplification             |
| vanRB       | 3C | 30.64 | 87.33 | 2.01 |                             |
| vanRC       | 3C |       |       |      | NoAmplification             |
| vanRC4      | 3C |       |       |      | NoAmplification             |
| vanRD       | 3C |       |       |      | BadR2, CtlSsmall, Saturatio |
| vanSA       | 3C |       |       |      | NoAmplification             |
| vanSB       | 3C | 30.02 | 75.14 | 1.94 | MultipleMeltPeaks           |
| vanSC-01    | 3C | 33.54 | 84.33 | 2.09 |                             |
| vanSC-02    | 3C |       |       |      | NoAmplification             |
| vanTC-01    | 3C |       |       |      | NoAmplification             |
| vanTC-02    | 3C | 32.61 | 86.5  | 1.71 | MultipleMeltPeaks           |
| vanTE       | 3C | 34.04 | 88.68 | 1.98 |                             |
| vanTG       | 3C |       |       |      | NoAmplification             |
| vanWB       | 3C |       |       |      | NoAmplification             |
| vanWG       | 3C |       |       |      | NoAmplification             |
| vanXA       | 3C | 36.12 | 78.81 | 1.89 |                             |
| vanXB       | 3C |       |       |      | NoAmplification             |
| vanXD       | 3C | 32.52 | 75.75 | 1.84 | MultipleMeltPeaks           |

|              |    |       |       |                        |
|--------------|----|-------|-------|------------------------|
| vanYB        | 3C |       |       | NoAmplification        |
| vanYD-01     | 3C | 29.86 | 86.77 | 1.83 MultipleMeltPeaks |
| vanYD-02     | 3C | 36.63 | 81.33 | 2.04                   |
| vatB-01      | 3C |       |       | NoAmplification        |
| vatB-02      | 3C |       |       | NoAmplification        |
| vatC-01      | 3C | 30.36 | 81.36 | 1.9                    |
| vatC-02      | 3C | 33.09 | 87.45 | 2.1                    |
| vatE-01      | 3C | 28.89 | 77.32 | 1.99                   |
| vatE-02      | 3C | 36.94 | 83.54 | 1.96                   |
| vgaA-01      | 3C |       |       | NoAmplification        |
| vgaA-02      | 3C | 35.89 | 84.45 | 1.85                   |
| vgb-01       | 3C | 35.14 | 87.44 | 1.87                   |
| vgbB-01      | 3C | 33.82 | 88.16 | 1.83                   |
| vgbB-02      | 3C |       |       | NoAmplification        |
| yceE/mdtG-0  | 3C | 35.4  | 77.33 | 2.14                   |
| yceE/mdtG-0  | 3C | 33.68 | 83.66 | 2.1                    |
| yceL/mdtH-0  | 3C | 28.59 | 86.29 | 1.93                   |
| yceL/mdtH-0  | 3C |       |       | NoAmplification        |
| yceL/mdtH-0  | 3C | 30.74 | 87.32 | 2.11 MultipleMeltPeaks |
| yidY/mdtL-01 | 3C | 27.93 | 88.73 | 2.17 MultipleMeltPeaks |
| yidY/mdtL-02 | 3C |       |       | NoAmplification        |































| Assay          | Sample | Ct | Tm    | Efficiency | flag                         |
|----------------|--------|----|-------|------------|------------------------------|
| 16S rRNA       | 4A     |    | 13.95 | 82.1       | 2.18                         |
| aac            | 4A     |    | 31.37 | 87.6       | 1.9 MultipleMeltPeaks        |
| aac(6')-Ib(akz | 4A     |    | 34.57 | 83.61      | 1.9                          |
| aac(6')-Ib(akz | 4A     |    | 31.36 | 85.86      | 1.99                         |
| aac(6')-Ib(akz | 4A     |    | 34.28 | 89.71      | 1.91                         |
| aac(6')-II     | 4A     |    | 32.97 | 83.96      | 1.91                         |
| aac(6')I1      | 4A     |    | 33.18 | 88.74      | 1.9                          |
| aacA/aphD      | 4A     |    |       |            | CurveFitFailed               |
| aacC           | 4A     |    | 27.9  | 88.1       | 1.84 MultipleMeltPeaks       |
| aacC1          | 4A     |    |       |            | LowEfficiency, CtIsSmall, S: |
| aacC2          | 4A     |    |       |            | NoAmplification              |
| aacC4          | 4A     |    | 32.74 | 88.1       | 1.97 MultipleMeltPeaks       |
| aadA-01        | 4A     |    |       |            | BadR2, LowEfficiency, CtIsS  |
| aadA-02        | 4A     |    | 35.33 | 80.47      | 1.93                         |
| aadA-1-01      | 4A     |    | 36.15 | 81.9       | 1.9 MultipleMeltPeaks        |
| aadA-1-02      | 4A     |    |       |            | CurveFitFailed               |
| aadA1          | 4A     |    | 32.07 | 84.91      | 1.97                         |
| aadA2-01       | 4A     |    |       |            | LowEfficiency, CtIsSmall, C: |
| aadA2-02       | 4A     |    | 30.92 | 75.63      | 1.99                         |
| aadA2-03       | 4A     |    |       |            | CurveFitFailed               |
| aadA5-01       | 4A     |    | 34.57 | 83.12      | 1.92                         |
| aadA5-02       | 4A     |    | 32.12 | 89.41      | 1.93                         |
| aadA9-01       | 4A     |    | 37.1  | 82.68      | 1.86 MultipleMeltPeaks       |
| aadA9-02       | 4A     |    | 36.66 | 86.68      | 1.95                         |
| aadD           | 4A     |    |       |            | LowEfficiency, CtIsSmall, S: |
| aadE           | 4A     |    |       |            | CurveFitFailed               |
| acrA-01        | 4A     |    | 29.35 | 89.28      | 1.94                         |
| acrA-02        | 4A     |    | 30.67 | 87.69      | 2.01 MultipleMeltPeaks       |
| acrA-03        | 4A     |    | 32.36 | 82.05      | 1.93 MultipleMeltPeaks       |
| acrA-04        | 4A     |    | 28.81 | 84.84      | 1.98 MultipleMeltPeaks       |
| acrA-05        | 4A     |    | 28.02 | 89.26      | 2                            |
| acrB-01        | 4A     |    | 36.21 | 75.46      | 1.97 MultipleMeltPeaks       |
| acrF           | 4A     |    | 26.52 | 84.74      | 1.86                         |
| acrR-01        | 4A     |    | 32.04 | 84.77      | 1.9 MultipleMeltPeaks        |
| acrR-02        | 4A     |    | 30.36 | 85.1       | 1.93 MultipleMeltPeaks       |
| Actin          | 4A     |    | 20.84 | 87.17      | 1.97                         |
| adeA           | 4A     |    | 37.09 | 78.08      | 1.88 MultipleMeltPeaks       |
| ampC-01        | 4A     |    | 31.42 | 85.43      | 1.79 MultipleMeltPeaks       |
| ampC-02        | 4A     |    | 32.94 | 89.24      | 1.92                         |
| ampC-04        | 4A     |    | 22.8  | 81.43      | 1.97                         |
| ampC-05        | 4A     |    |       |            | LowEfficiency, CtIsSmall, C: |
| ampC-06        | 4A     |    |       |            | LowEfficiency, CtIsSmall, S: |
| ampC-07        | 4A     |    | 21.85 | 85.26      | 1.92                         |
| ampC-09        | 4A     |    |       |            | CurveFitFailed               |
| ampC/blaDH     | 4A     |    | 31.62 | 85.15      | 1.93                         |

|                          |    |       |       |      |                                          |
|--------------------------|----|-------|-------|------|------------------------------------------|
| aph                      | 4A |       |       |      | LowEfficiency, CtIsSmall, S <sub>e</sub> |
| aph(2')-Id-01            | 4A |       |       |      | CurveFitFailed                           |
| aph(2')-Id-02            | 4A |       |       |      | LowEfficiency, CtIsSmall, S <sub>e</sub> |
| aph6ia                   | 4A | 30.47 | 79.09 | 1.94 |                                          |
| aphA1(aka k <sub>z</sub> | 4A | 29.14 | 76.32 | 2.1  |                                          |
| bacA-01                  | 4A |       |       |      | CurveFitFailed                           |
| bacA-02                  | 4A |       |       |      | NoAmplification                          |
| BETA-globin              | 4A | 22.41 | 84.28 | 1.99 |                                          |
| bla-ACC-1                | 4A | 33.4  | 86.25 | 1.92 |                                          |
| bla-L1                   | 4A | 28.87 | 84.57 | 1.99 |                                          |
| bla1                     | 4A |       |       |      | LowEfficiency, CtIsSmall, S <sub>e</sub> |
| blaCMY                   | 4A | 31.76 | 80.25 | 1.93 |                                          |
| blaCMY2-01               | 4A | 23.8  | 84.08 | 2.03 |                                          |
| blaCMY2-02               | 4A | 29.47 | 85.86 | 1.95 | MultipleMeltPeaks                        |
| blaCTX-M-01              | 4A | 31.97 | 90.06 | 2.11 |                                          |
| blaCTX-M-02              | 4A | 30.6  | 84.77 | 1.89 |                                          |
| blaCTX-M-03              | 4A |       |       |      | LowEfficiency, CtIsSmall, S <sub>e</sub> |
| blaCTX-M-04              | 4A | 31.94 | 87.99 | 1.98 | MultipleMeltPeaks                        |
| blaCTX-M-05              | 4A | 35.08 | 75.92 | 1.81 |                                          |
| blaCTX-M-06              | 4A | 37.3  | 82.65 | 2.09 |                                          |
| blaGES                   | 4A |       |       |      | CurveFitFailed                           |
| blaIMP-01                | 4A |       |       |      | CurveFitFailed                           |
| blaIMP-02                | 4A |       |       |      | CurveFitFailed                           |
| blaMOX/blaC              | 4A |       |       |      | NoAmplification                          |
| blaOCH                   | 4A |       |       |      | NoAmplification                          |
| blaOKP                   | 4A |       |       |      | NoAmplification                          |
| blaOXA1/blaC             | 4A |       |       |      | LowEfficiency, CtIsSmall, S <sub>e</sub> |
| blaOXA10-01              | 4A |       |       |      | LowEfficiency, CtIsSmall, S <sub>e</sub> |
| blaOXA10-02              | 4A |       |       |      | LowEfficiency, CtIsSmall, S <sub>e</sub> |
| blaOXY                   | 4A | 29.94 | 90.01 | 1.82 |                                          |
| blaPAO                   | 4A | 33.44 | 91.56 | 1.92 |                                          |
| blaPER                   | 4A |       |       |      | LowEfficiency, CtIsSmall, S <sub>e</sub> |
| blaPSE                   | 4A | 35.45 | 88.49 | 1.82 |                                          |
| blaROB                   | 4A | 31.17 | 92.61 | 1.91 |                                          |
| blaSFO                   | 4A | 28.81 | 88.34 | 1.95 |                                          |
| blaSHV-01                | 4A | 29.84 | 88.75 | 2.13 |                                          |
| blaSHV-02                | 4A | 33.72 | 84.24 | 2.02 | MultipleMeltPeaks                        |
| blaTEM                   | 4A | 28.97 | 79.13 | 2.06 |                                          |
| blaTLA                   | 4A |       |       |      | LowEfficiency, CtIsSmall, S <sub>e</sub> |
| blaVEB                   | 4A |       |       |      | CurveFitFailed                           |
| blaVIM                   | 4A | 35.62 | 88.01 | 1.87 |                                          |
| blaZ                     | 4A |       |       |      | LowEfficiency, CtIsSmall, S <sub>e</sub> |
| carB                     | 4A | 33.5  | 86    | 1.92 |                                          |
| catA1                    | 4A |       |       |      | NoAmplification                          |
| catB3                    | 4A |       |       |      | LowEfficiency, CtIsSmall, C <sub>i</sub> |
| catB8                    | 4A | 28.84 | 81.81 | 1.97 |                                          |

|            |    |       |       |      |                                          |
|------------|----|-------|-------|------|------------------------------------------|
| ceoA       | 4A | 26.68 | 87.96 | 1.96 |                                          |
| cepA       | 4A |       |       |      | NoAmplification                          |
| cfiA       | 4A | 30.44 | 87.94 | 1.85 |                                          |
| cfr        | 4A |       |       |      | CurveFitFailed                           |
| cfxA       | 4A | 22.94 | 77.98 | 2.1  |                                          |
| cmeA       | 4A | 37.35 | 78.12 | 1.82 | MultipleMeltPeaks                        |
| cmlA1-01   | 4A | 34.65 | 87.6  | 1.88 |                                          |
| cmlA1-02   | 4A | 35.89 | 89.71 | 1.87 |                                          |
| cmr        | 4A |       |       |      | LowEfficiency, CtIsSmall, S <sub>e</sub> |
| cmx(A)     | 4A | 27.12 | 84.7  | 2.02 |                                          |
| cphA-01    | 4A | 30.84 | 87.43 | 1.92 |                                          |
| cphA-02    | 4A | 35.16 | 83.73 | 1.86 |                                          |
| dfrA1      | 4A | 37.57 | 79.11 | 1.86 | MultipleMeltPeaks                        |
| dfrA12     | 4A | 38.25 | 78.02 | 1.73 | MultipleMeltPeaks                        |
| emrD       | 4A | 29.5  | 91.02 | 1.89 | MultipleMeltPeaks                        |
| ereA       | 4A | 35.79 | 82.65 | 1.89 |                                          |
| ereB       | 4A | 29.7  | 85.86 | 2.1  |                                          |
| erm(34)    | 4A | 36.32 | 87.14 | 1.89 |                                          |
| erm(35)    | 4A |       |       |      | LowEfficiency, CtIsSmall, S <sub>e</sub> |
| erm(36)    | 4A | 29.06 | 84.65 | 2.12 | MultipleMeltPeaks                        |
| ermA       | 4A |       |       |      | LowEfficiency, CtIsSmall, S <sub>e</sub> |
| ermA/ermTR | 4A |       |       |      | NoAmplification                          |
| ermB       | 4A | 17.44 | 75.14 | 2.16 |                                          |
| ermC       | 4A |       |       |      | LowEfficiency, CtIsSmall, S <sub>e</sub> |
| ermF       | 4A |       |       |      | CurveFitFailed                           |
| ermJ/ermD  | 4A |       |       |      | LowEfficiency, CtIsSmall, S <sub>e</sub> |
| ermK-01    | 4A | 37.63 | 73.85 | 2.1  |                                          |
| ermK-02    | 4A | 34.71 | 86.62 | 1.82 |                                          |
| ermT-01    | 4A |       |       |      | CurveFitFailed                           |
| ermT-02    | 4A | 30.35 | 75.32 | 2.03 |                                          |
| ermX       | 4A | 32.23 | 86.6  | 1.86 |                                          |
| ermY       | 4A |       |       |      | LowEfficiency, CtIsSmall, S <sub>e</sub> |
| fabK       | 4A | 17.14 | 77.98 | 2.29 |                                          |
| floR       | 4A | 36.98 | 89.62 | 1.76 | MultipleMeltPeaks                        |
| folA       | 4A |       |       |      | NoAmplification                          |
| fosB       | 4A |       |       |      | LowEfficiency, CtIsSmall, S <sub>e</sub> |
| fosX       | 4A |       |       |      | LowEfficiency, CtIsSmall, S <sub>e</sub> |
| fox5       | 4A | 26.4  | 88.25 | 1.98 | MultipleMeltPeaks                        |
| imiR       | 4A |       |       |      | NoAmplification                          |
| ImrA-01    | 4A | 36.61 | 84.26 | 1.81 | MultipleMeltPeaks                        |
| intl       | 4A | 27.96 | 84.8  | 2.01 |                                          |
| intl1      | 4A | 20.49 | 87.71 | 2.03 |                                          |
| IS613      | 4A | 21.12 | 79.87 | 2.1  |                                          |
| lnuA-01    | 4A |       |       |      | CurveFitFailed                           |
| lnuB-01    | 4A |       |       |      | LowEfficiency, CtIsSmall, S <sub>e</sub> |
| lnuB-02    | 4A |       |       |      | BadR2, LowEfficiency, CtIsS <sub>e</sub> |

|                |    |       |       |      |                              |
|----------------|----|-------|-------|------|------------------------------|
| lnuC           | 4A | 30.58 | 87.67 | 1.87 |                              |
| marR-01        | 4A | 32.6  | 85.53 | 1.95 | MultipleMeltPeaks            |
| matA/mel       | 4A | 18.77 | 77.86 | 2.07 |                              |
| mdetI1         | 4A |       |       |      | NoAmplification              |
| mdtA           | 4A | 33.6  | 82.01 | 1.78 |                              |
| mdtE/yhiU      | 4A | 31.52 | 91.06 | 1.93 |                              |
| mecA           | 4A |       |       |      | LowEfficiency, CtIsSmall, S: |
| mefA           | 4A | 17.96 | 80.6  | 1.98 | MultipleMeltPeaks            |
| mepA           | 4A | 27.78 | 91.23 | 2.05 | MultipleMeltPeaks            |
| mexA           | 4A | 34.5  | 82.78 | 1.89 | MultipleMeltPeaks            |
| mexD           | 4A | 31.46 | 80.45 | 1.88 |                              |
| mexE           | 4A | 34.57 | 89.8  | 1.84 |                              |
| mexF           | 4A | 26.65 | 85.87 | 1.98 | MultipleMeltPeaks            |
| mphA-01        | 4A | 27.07 | 87.24 | 1.99 |                              |
| mphA-02        | 4A | 27.75 | 87.33 | 2.01 | MultipleMeltPeaks            |
| mphB           | 4A |       |       |      | CurveFitFailed               |
| mphC           | 4A | 33.61 | 85.23 | 1.86 |                              |
| msrA-01        | 4A |       |       |      | CurveFitFailed               |
| msrC-01        | 4A |       |       |      | NoAmplification              |
| mtrC-01        | 4A | 34.31 | 87.91 | 1.91 |                              |
| mtrC-02        | 4A | 31.23 | 84.41 | 1.97 |                              |
| mtrD-02        | 4A | 25.97 | 81.76 | 1.97 |                              |
| mtrD-03        | 4A | 33.11 | 82.42 | 1.89 |                              |
| NDM1           | 4A |       |       |      | LowEfficiency, CtIsSmall, S: |
| nimE           | 4A | 29.23 | 76.47 | 1.95 | MultipleMeltPeaks            |
| nisB           | 4A |       |       |      | NoAmplification              |
| oleC           | 4A | 32.15 | 89.08 | 1.91 |                              |
| oprD           | 4A | 26.88 | 87.99 | 2.02 |                              |
| oprJ           | 4A | 27.83 | 92.24 | 2.02 |                              |
| pbp            | 4A |       |       |      | LowEfficiency, CtIsSmall, S: |
| pbp2x          | 4A | 17.36 | 76.5  | 2.03 |                              |
| Pbp5           | 4A |       |       |      | CurveFitFailed               |
| penA           | 4A | 31.76 | 92.03 | 1.94 | MultipleMeltPeaks            |
| pikR1          | 4A |       |       |      | LowEfficiency, CtIsSmall, S: |
| pikR2          | 4A | 30.52 | 87.18 | 2.01 | MultipleMeltPeaks            |
| pmrA           | 4A | 17.61 | 80.37 | 2.13 |                              |
| pncA           | 4A | 28.03 | 89.55 | 1.87 |                              |
| putative multi | 4A | 34.51 | 84.21 | 1.92 | MultipleMeltPeaks            |
| qac            | 4A | 36.87 | 79.64 | 1.83 | MultipleMeltPeaks            |
| qacA           | 4A |       |       |      | CurveFitFailed               |
| qacA/qacB      | 4A | 43.6  | 84.74 | 1.42 | MultipleMeltPeaks            |
| qacEdelta1-0   | 4A |       |       |      | CurveFitFailed               |
| qacEdelta1-0   | 4A | 29.16 | 91.52 | 1.98 |                              |
| qacH-01        | 4A | 30.97 | 88.45 | 1.99 | MultipleMeltPeaks            |
| qacH-02        | 4A | 34.54 | 83.89 | 1.81 |                              |
| qnrA           | 4A | 36.67 | 79.15 | 1.85 |                              |



|              |    |       |       |      |                              |
|--------------|----|-------|-------|------|------------------------------|
| rarD-02      | 4A | 36.55 | 85.64 | 1.9  | MultipleMeltPeaks            |
| sat4         | 4A |       |       |      | LowEfficiency, CtIsSmall, S: |
| sdeB         | 4A |       |       |      | CurveFitFailed               |
| spcN-01      | 4A | 35.07 | 84.35 | 1.91 |                              |
| speA         | 4A |       |       |      | NoAmplification              |
| str          | 4A |       |       |      | CurveFitFailed               |
| strA         | 4A |       |       |      | CurveFitFailed               |
| strB         | 4A |       |       |      | BadR2, LowEfficiency, CtIsS  |
| sul1         | 4A | 31.39 | 90.26 | 2.08 |                              |
| sul2         | 4A | 30.95 | 91.67 | 1.87 |                              |
| sulA/foIP-01 | 4A | 16.31 | 82.36 | 2.04 |                              |
| sulA/foIP-03 | 4A | 17.08 | 83.7  | 2.05 |                              |
| tet(32)      | 4A |       |       |      | NoAmplification              |
| tet(34)      | 4A | 28.78 | 76.25 | 2.01 |                              |
| tet(35)      | 4A | 36.05 | 76.02 | 1.93 |                              |
| tet(36)-A    | 4A | 35.67 | 81.94 | 1.84 |                              |
| tet(36)-B    | 4A |       |       |      | CurveFitFailed               |
| tet(37)      | 4A | 23.21 | 76.62 | 2    |                              |
| tetA-01      | 4A | 31.38 | 85.3  | 1.89 |                              |
| tetA-02      | 4A | 34.26 | 87.61 | 1.87 | MultipleMeltPeaks            |
| tetB-01      | 4A | 30.46 | 88.36 | 1.94 |                              |
| tetB-02      | 4A | 34.14 | 84.7  | 1.79 |                              |
| tetC-01      | 4A |       |       |      | NoAmplification              |
| tetC-02      | 4A |       |       |      | BadR2, LowEfficiency, CtIsS  |
| tetD-01      | 4A |       |       |      | CurveFitFailed               |
| tetD-02      | 4A | 30.23 | 84.44 | 1.97 |                              |
| tetE         | 4A |       |       |      | LowEfficiency, CtIsSmall, S: |
| tetG-01      | 4A | 29.94 | 82.77 | 2.09 | MultipleMeltPeaks            |
| tetG-02      | 4A | 32.67 | 88.96 | 1.96 | MultipleMeltPeaks            |
| tetH         | 4A |       |       |      | LowEfficiency, CtIsSmall, Ci |
| tetJ         | 4A | 36.15 | 86.78 | 1.86 |                              |
| tetK         | 4A |       |       |      | CurveFitFailed               |
| tetL-01      | 4A |       |       |      | CurveFitFailed               |
| tetL-02      | 4A | 33.77 | 85.45 | 1.76 |                              |
| tetM-01      | 4A | 17.24 | 76.25 | 2.06 |                              |
| tetM-02      | 4A | 17.39 | 77.85 | 2.08 |                              |
| tetO-01      | 4A |       |       |      | CurveFitFailed               |
| tetPA        | 4A |       |       |      | CurveFitFailed               |
| tetPB-01     | 4A |       |       |      | NoAmplification              |
| tetPB-02     | 4A | 30.23 | 85.1  | 2.03 |                              |
| tetPB-03     | 4A |       |       |      | LowEfficiency, CtIsSmall, S: |
| tetPB-05     | 4A |       |       |      | CurveFitFailed               |
| tetQ         | 4A | 27.81 | 76.74 | 2.04 |                              |
| tetR-02      | 4A | 28.42 | 89.78 | 1.93 | MultipleMeltPeaks            |
| tetR-03      | 4A |       |       |      | CurveFitFailed               |
| tetS         | 4A | 34.11 | 85.59 | 2.22 |                              |

|             |    |       |       |      |                                          |
|-------------|----|-------|-------|------|------------------------------------------|
| tetT        | 4A | 37.96 | 72.06 | 1.92 |                                          |
| tetU-01     | 4A |       |       |      | LowEfficiency, CtIsSmall, S <sub>c</sub> |
| tetV        | 4A |       |       |      | CurveFitFailed                           |
| tetW-01     | 4A |       |       |      | CurveFitFailed                           |
| tetX        | 4A |       |       |      | CurveFitFailed                           |
| tnpA-01     | 4A |       |       |      | CurveFitFailed                           |
| tnpA-02     | 4A | 38.16 | 80.88 | 1.7  | MultipleMeltPeaks                        |
| tnpA-03     | 4A | 29.01 | 77.89 | 2.15 |                                          |
| tnpA-04     | 4A | 36.69 | 78.4  | 1.88 | MultipleMeltPeaks                        |
| tnpA-05     | 4A | 32.27 | 82.83 | 1.94 |                                          |
| tnpA-07     | 4A |       |       |      | LowEfficiency, CtIsSmall, C <sub>i</sub> |
| tolC-01     | 4A | 32.74 | 79.92 | 1.86 | MultipleMeltPeaks                        |
| tolC-02     | 4A | 28.44 | 87.85 | 2.01 |                                          |
| tolC-03     | 4A | 29.25 | 86.31 | 1.97 |                                          |
| Tp614       | 4A | 31.15 | 82    | 2    |                                          |
| ttgA        | 4A | 28.45 | 84.13 | 1.89 |                                          |
| ttgB        | 4A | 33.75 | 80.34 | 1.99 | MultipleMeltPeaks                        |
| vanA        | 4A |       |       |      | NoAmplification                          |
| vanB-01     | 4A | 31.1  | 83.33 | 1.93 |                                          |
| vanC-01     | 4A |       |       |      | CurveFitFailed                           |
| vanC-02     | 4A |       |       |      | CurveFitFailed                           |
| vanC-03     | 4A | 25.25 | 91.95 | 1.95 | MultipleMeltPeaks                        |
| vanC1       | 4A | 36.07 | 88.34 | 1.86 |                                          |
| vanC2/vanC3 | 4A | 32.14 | 85.1  | 2.08 |                                          |
| vanG        | 4A |       |       |      | BadR2, CtIsSmall, Saturatio              |
| vanHB       | 4A | 35.79 | 88.7  | 1.85 |                                          |
| vanHD       | 4A | 35.62 | 84.11 | 1.81 | MultipleMeltPeaks                        |
| vanRA-01    | 4A |       |       |      | LowEfficiency, CtIsSmall, C <sub>i</sub> |
| vanRA-02    | 4A |       |       |      | LowEfficiency, CtIsSmall, S <sub>c</sub> |
| vanRB       | 4A | 32.94 | 87.53 | 2.05 |                                          |
| vanRC       | 4A |       |       |      | LowEfficiency, CtIsSmall, C <sub>i</sub> |
| vanRC4      | 4A |       |       |      | LowEfficiency, CtIsSmall, S <sub>c</sub> |
| vanRD       | 4A |       |       |      | BadR2, CtIsSmall, Saturatio              |
| vanSA       | 4A |       |       |      | LowEfficiency, CtIsSmall, S <sub>c</sub> |
| vanSB       | 4A | 28.91 | 75.05 | 2.04 |                                          |
| vanSC-01    | 4A | 33.53 | 83.34 | 2    |                                          |
| vanSC-02    | 4A |       |       |      | NoAmplification                          |
| vanTC-01    | 4A |       |       |      | LowEfficiency, CtIsSmall, S <sub>c</sub> |
| vanTC-02    | 4A | 32.61 | 87.66 | 1.74 |                                          |
| vanTE       | 4A | 39.1  | 75.57 | 1.71 | MultipleMeltPeaks                        |
| vanTG       | 4A |       |       |      | BadR2, CtIsSmall, Saturatio              |
| vanWB       | 4A |       |       |      | BadR2, LowEfficiency, CtIsS              |
| vanWG       | 4A | 32.68 | 76.24 | 1.9  | MultipleMeltPeaks                        |
| vanXA       | 4A |       |       |      | CurveFitFailed                           |
| vanXB       | 4A |       |       |      | LowEfficiency, CtIsSmall, S <sub>c</sub> |
| vanXD       | 4A | 29.31 | 76.43 | 2    |                                          |

|              |    |       |       |      |                               |
|--------------|----|-------|-------|------|-------------------------------|
| vanYB        | 4A |       |       |      | CurveFitFailed                |
| vanYD-01     | 4A | 29.72 | 89.54 | 1.92 |                               |
| vanYD-02     | 4A | 36.76 | 83.86 | 1.9  |                               |
| vatB-01      | 4A |       |       |      | LowEfficiency, CtlIsSmall, S: |
| vatB-02      | 4A | 33.45 | 77.86 | 2.15 |                               |
| vatC-01      | 4A |       |       |      | CurveFitFailed                |
| vatC-02      | 4A | 36.27 | 87.31 | 1.86 |                               |
| vatE-01      | 4A | 27.43 | 77.64 | 2.06 |                               |
| vatE-02      | 4A | 37.79 | 75.26 | 2.2  |                               |
| vgaA-01      | 4A | 37.76 | 83.9  | 1.89 | MultipleMeltPeaks             |
| vgaA-02      | 4A |       |       |      | LowEfficiency, CtlIsSmall, S: |
| vgb-01       | 4A | 31.74 | 88.02 | 1.94 |                               |
| vgbB-01      | 4A | 37.29 | 76.08 | 1.69 |                               |
| vgbB-02      | 4A |       |       |      | LowEfficiency, CtlIsSmall, S: |
| yceE/mdtG-0  | 4A | 36.54 | 77.64 | 2    | MultipleMeltPeaks             |
| yceE/mdtG-0  | 4A | 37.4  | 81.67 | 1.81 |                               |
| yceL/mdtH-0  | 4A | 30.21 | 86.5  | 1.94 |                               |
| yceL/mdtH-0  | 4A |       |       |      | CurveFitFailed                |
| yceL/mdtH-0  | 4A | 26.6  | 81.39 | 1.96 | MultipleMeltPeaks             |
| yidY/mdtL-01 | 4A | 27.51 | 84.51 | 2.02 | MultipleMeltPeaks             |
| yidY/mdtL-02 | 4A | 31.62 | 93.06 | 1.91 |                               |































| Assay          | Sample | Ct    | Tm    | Efficiency | flag                            |
|----------------|--------|-------|-------|------------|---------------------------------|
| 16S rRNA       | 4B     |       | 15.78 | 81.55      | 2.02                            |
| aac            | 4B     |       | 29.38 | 77.58      | 1.71 LowEfficiency, MultipleMel |
| aac(6')-Ib(akz | 4B     |       |       |            | LowEfficiency, CtIsSmall, Ci    |
| aac(6')-Ib(akz | 4B     | 29.13 | 87.08 | 1.97       |                                 |
| aac(6')-Ib(akz | 4B     |       |       |            | CtIsLarge, CurveFitFailed       |
| aac(6')-II     | 4B     |       |       |            | LowEfficiency, CtIsLarge, Ci    |
| aac(6')I1      | 4B     |       |       |            | LowEfficiency, CtIsLarge, Ci    |
| aacA/aphD      | 4B     |       |       |            | NoAmplification                 |
| aacC           | 4B     |       |       |            | LowEfficiency, CtIsLarge, Ci    |
| aacC1          | 4B     |       |       |            | LowEfficiency, CtIsLarge, Ci    |
| aacC2          | 4B     |       |       |            | NoAmplification                 |
| aacC4          | 4B     | 31.66 | 90.29 | 1.99       | CtIsLarge, SaturationBaseli     |
| aadA-01        | 4B     |       |       |            | NoAmplification                 |
| aadA-02        | 4B     | 31.6  | 80.39 | 2          | CtIsLarge                       |
| aadA-1-01      | 4B     | 33.49 | 81.17 | 1.91       | CtIsLarge, MultipleMeltPez      |
| aadA-1-02      | 4B     |       |       |            | NoAmplification                 |
| aadA1          | 4B     |       |       |            | NoAmplification                 |
| aadA2-01       | 4B     |       |       |            | LowEfficiency, CtIsLarge, Ci    |
| aadA2-02       | 4B     |       |       |            | NoAmplification                 |
| aadA2-03       | 4B     |       |       |            | CtIsLarge, CurveFitFailed       |
| aadA5-01       | 4B     |       |       |            | NoAmplification                 |
| aadA5-02       | 4B     | 30.82 | 83.31 | 2          | CtIsLarge, MultipleMeltPez      |
| aadA9-01       | 4B     |       |       |            | CtIsLarge, CurveFitFailed       |
| aadA9-02       | 4B     |       |       |            | LowEfficiency, CtIsLarge, Ci    |
| aadD           | 4B     |       |       |            | NoAmplification                 |
| aadE           | 4B     |       |       |            | NoAmplification                 |
| acrA-01        | 4B     |       |       |            | NoAmplification                 |
| acrA-02        | 4B     | 33.42 | 87.49 | 1.9        | CtIsLarge                       |
| acrA-03        | 4B     |       |       |            | NoAmplification                 |
| acrA-04        | 4B     | 28.57 | 80.12 | 2          | MultipleMeltPeaks               |
| acrA-05        | 4B     | 29.57 | 84.2  | 1.96       | CtIsLarge, MultipleMeltPez      |
| acrB-01        | 4B     |       |       |            | CtIsLarge, CurveFitFailed       |
| acrF           | 4B     | 27.97 | 82.8  | 1.78       | LowEfficiency                   |
| acrR-01        | 4B     | 31.46 | 90.89 | 1.97       | CtIsLarge, MultipleMeltPez      |
| acrR-02        | 4B     | 31.9  | 86.57 | 1.93       | CtIsLarge                       |
| Actin          | 4B     |       |       |            | NoAmplification                 |
| adeA           | 4B     |       |       |            | LowEfficiency, CtIsLarge, Ci    |
| ampC-01        | 4B     | 31.45 | 84.2  | 2.01       | CtIsLarge, MultipleMeltPez      |
| ampC-02        | 4B     |       |       |            | NoAmplification                 |
| ampC-04        | 4B     | 30.96 | 85.65 | 1.7        | LowEfficiency, CtIsLarge, M     |
| ampC-05        | 4B     |       |       |            | NoAmplification                 |
| ampC-06        | 4B     |       |       |            | CtIsLarge, CurveFitFailed       |
| ampC-07        | 4B     |       |       |            | NoAmplification                 |
| ampC-09        | 4B     |       |       |            | LowEfficiency, CtIsLarge, Ci    |
| ampC/blaDH     | 4B     | 29.72 | 77.34 | 2          | CtIsLarge, MultipleMeltPez      |

|                          |    |       |       |      |                              |
|--------------------------|----|-------|-------|------|------------------------------|
| aph                      | 4B |       |       |      | LowEfficiency, CtIsSmall, S: |
| aph(2')-Id-01            | 4B |       |       |      | NoAmplification              |
| aph(2')-Id-02            | 4B |       |       |      | CurveFitFailed               |
| aph6ia                   | 4B | 34.93 | 78.06 | 1.91 | CtIsLarge, MultipleMeltPe:   |
| aphA1(aka k <sub>z</sub> | 4B |       |       |      | NoAmplification              |
| bacA-01                  | 4B |       |       |      | CurveFitFailed               |
| bacA-02                  | 4B |       |       |      | NoAmplification              |
| BETA-globin              | 4B | 22.58 | 83.94 | 2.03 |                              |
| bla-ACC-1                | 4B | 34    | 86.35 | 1.89 | CtIsLarge                    |
| bla-L1                   | 4B | 31.11 | 84.17 | 1.98 | CtIsLarge, MultipleMeltPe:   |
| bla1                     | 4B |       |       |      | NoAmplification              |
| blaCMY                   | 4B |       |       |      | NoAmplification              |
| blaCMY2-01               | 4B |       |       |      | LowEfficiency, CtIsLarge, C: |
| blaCMY2-02               | 4B |       |       |      | NoAmplification              |
| blaCTX-M-01              | 4B |       |       |      | CtIsLarge, CurveFitFailed    |
| blaCTX-M-02              | 4B | 32.41 | 85.53 | 1.94 | CtIsLarge, MultipleMeltPe:   |
| blaCTX-M-03              | 4B |       |       |      | NoAmplification              |
| blaCTX-M-04              | 4B | 30.51 | 87.52 | 1.8  | LowEfficiency, CtIsLarge, M  |
| blaCTX-M-05              | 4B | 32.06 | 76.82 | 1.76 | LowEfficiency, CtIsLarge, S: |
| blaCTX-M-06              | 4B |       |       |      | NoAmplification              |
| blaGES                   | 4B |       |       |      | NoAmplification              |
| blaIMP-01                | 4B |       |       |      | NoAmplification              |
| blaIMP-02                | 4B | 34.46 | 89.97 | 1.91 | CtIsLarge, MultipleMeltPe:   |
| blaMOX/blaC              | 4B |       |       |      | NoAmplification              |
| blaOCH                   | 4B |       |       |      | NoAmplification              |
| blaOKP                   | 4B |       |       |      | NoAmplification              |
| blaOXA1/blaC             | 4B |       |       |      | NoAmplification              |
| blaOXA10-01              | 4B |       |       |      | LowEfficiency, CtIsSmall, S: |
| blaOXA10-02              | 4B |       |       |      | CurveFitFailed               |
| blaOXY                   | 4B |       |       |      | LowEfficiency, CtIsLarge, C: |
| blaPAO                   | 4B |       |       |      | NoAmplification              |
| blaPER                   | 4B | 33.24 | 74.7  | 2.03 | CtIsLarge, MultipleMeltPe:   |
| blaPSE                   | 4B |       |       |      | NoAmplification              |
| blaROB                   | 4B |       |       |      | LowEfficiency, CtIsLarge, C: |
| blaSFO                   | 4B |       |       |      | NoAmplification              |
| blaSHV-01                | 4B | 27.03 | 88.69 | 1.9  |                              |
| blaSHV-02                | 4B |       |       |      | NoAmplification              |
| blaTEM                   | 4B | 25.05 | 79.23 | 2    |                              |
| blaTLA                   | 4B |       |       |      | NoAmplification              |
| blaVEB                   | 4B |       |       |      | NoAmplification              |
| blaVIM                   | 4B |       |       |      | NoAmplification              |
| blaZ                     | 4B | 27.77 | 75.45 | 1.99 |                              |
| carB                     | 4B |       |       |      | NoAmplification              |
| catA1                    | 4B |       |       |      | NoAmplification              |
| catB3                    | 4B |       |       |      | LowEfficiency, CtIsLarge, C: |
| catB8                    | 4B | 28.99 | 81.94 | 1.93 | MultipleMeltPeaks            |

|            |    |       |       |      |                              |
|------------|----|-------|-------|------|------------------------------|
| ceoA       | 4B | 28.82 | 82.03 | 1.97 | MultipleMeltPeaks            |
| cepA       | 4B |       |       |      | NoAmplification              |
| cfiA       | 4B | 30.83 | 85.79 | 1.96 | CtIsLarge, SaturationBaseli  |
| cfr        | 4B |       |       |      | LowEfficiency, CtIsSmall, S: |
| cfxA       | 4B |       |       |      | NoAmplification              |
| cmeA       | 4B |       |       |      | CurveFitFailed               |
| cmlA1-01   | 4B | 33.43 | 89.47 | 1.95 | CtIsLarge, MultipleMeltPe:   |
| cmlA1-02   | 4B |       |       |      | LowEfficiency, CtIsLarge, C: |
| cmr        | 4B |       |       |      | CtIsLarge, CurveFitFailed    |
| cmx(A)     | 4B | 28.04 | 84.7  | 2.04 | MultipleMeltPeaks            |
| cphA-01    | 4B | 28.86 | 89.14 | 1.99 |                              |
| cphA-02    | 4B |       |       |      | CurveFitFailed               |
| dfrA1      | 4B |       |       |      | NoAmplification              |
| dfrA12     | 4B | 30.85 | 82.26 | 1.91 | CtIsLarge, MultipleMeltPe:   |
| emrD       | 4B | 34.71 | 89.14 | 1.77 | LowEfficiency, CtIsLarge     |
| ereA       | 4B | 33.37 | 82.47 | 1.96 | CtIsLarge                    |
| ereB       | 4B |       |       |      | NoAmplification              |
| erm(34)    | 4B |       |       |      | LowEfficiency, CtIsLarge, C: |
| erm(35)    | 4B |       |       |      | NoAmplification              |
| erm(36)    | 4B | 34.21 | 86.09 | 1.97 | CtIsLarge                    |
| ermA       | 4B |       |       |      | NoAmplification              |
| ermA/ermTR | 4B | 26    | 75.96 | 2.03 |                              |
| ermB       | 4B |       |       |      | NoAmplification              |
| ermC       | 4B |       |       |      | CtIsLarge, CurveFitFailed    |
| ermF       | 4B |       |       |      | NoAmplification              |
| ermJ/ermD  | 4B |       |       |      | LowEfficiency, CtIsLarge, C: |
| ermK-01    | 4B |       |       |      | NoAmplification              |
| ermK-02    | 4B | 32.3  | 77.08 | 1.91 | CtIsLarge, MultipleMeltPe:   |
| ermT-01    | 4B |       |       |      | NoAmplification              |
| ermT-02    | 4B |       |       |      | CtIsLarge, CurveFitFailed    |
| ermX       | 4B |       |       |      | NoAmplification              |
| ermY       | 4B |       |       |      | CtIsLarge, CurveFitFailed    |
| fabK       | 4B | 18.67 | 77.56 | 2.18 |                              |
| floR       | 4B |       |       |      | NoAmplification              |
| folA       | 4B |       |       |      | NoAmplification              |
| fosB       | 4B |       |       |      | LowEfficiency, CtIsSmall, S: |
| fosX       | 4B |       |       |      | NoAmplification              |
| fox5       | 4B | 26.06 | 87.23 | 2.01 |                              |
| imiR       | 4B |       |       |      | LowEfficiency, SaturationB:  |
| ImrA-01    | 4B |       |       |      | CtIsLarge, CurveFitFailed    |
| intl       | 4B |       |       |      | LowEfficiency, CtIsLarge, C: |
| intl1      | 4B | 19.6  | 87.23 | 2.05 |                              |
| IS613      | 4B | 22.81 | 79.47 | 1.82 |                              |
| lnuA-01    | 4B |       |       |      | CurveFitFailed               |
| lnuB-01    | 4B |       |       |      | LowEfficiency, CtIsSmall, S: |
| lnuB-02    | 4B |       |       |      | CurveFitFailed               |

|                |    |       |       |      |                             |
|----------------|----|-------|-------|------|-----------------------------|
| lnuC           | 4B |       |       |      | LowEfficiency, CtIsLarge, C |
| marR-01        | 4B |       |       |      | CtIsLarge, CurveFitFailed   |
| matA/mel       | 4B | 18.48 | 77.84 | 2.08 |                             |
| mdet11         | 4B |       |       |      | NoAmplification             |
| mdtA           | 4B | 34.62 | 86.5  | 1.79 | LowEfficiency, CtIsLarge    |
| mdtE/yhiU      | 4B | 32.41 | 88.87 | 1.89 | CtIsLarge                   |
| mecA           | 4B |       |       |      | NoAmplification             |
| mefA           | 4B | 17.57 | 80.52 | 2    | MultipleMeltPeaks           |
| mepA           | 4B | 28.91 | 86.96 | 2.04 |                             |
| mexA           | 4B |       |       |      | BadR2, LowEfficiency, CtIsS |
| mexD           | 4B | 30.51 | 80.35 | 2.04 | CtIsLarge                   |
| mexE           | 4B |       |       |      | NoAmplification             |
| mexF           | 4B | 26.88 | 84.85 | 2.06 | MultipleMeltPeaks           |
| mphA-01        | 4B | 29.63 | 91.08 | 1.97 | CtIsLarge                   |
| mphA-02        | 4B | 28.59 | 86.42 | 2.13 | MultipleMeltPeaks           |
| mphB           | 4B |       |       |      | LowEfficiency, CtIsLarge, C |
| mphC           | 4B |       |       |      | LowEfficiency, CtIsLarge, C |
| msrA-01        | 4B |       |       |      | NoAmplification             |
| msrC-01        | 4B |       |       |      | NoAmplification             |
| mtrC-01        | 4B |       |       |      | NoAmplification             |
| mtrC-02        | 4B | 29.5  | 84.01 | 1.99 |                             |
| mtrD-02        | 4B |       |       |      | NoAmplification             |
| mtrD-03        | 4B | 30.07 | 82.1  | 1.97 | CtIsLarge, MultipleMeltPec  |
| NDM1           | 4B |       |       |      | CtIsLarge, CurveFitFailed   |
| nimE           | 4B |       |       |      | NoAmplification             |
| nisB           | 4B |       |       |      | CtIsLarge, SaturationBaseli |
| oleC           | 4B | 33.17 | 87.53 | 1.89 | CtIsLarge                   |
| oprD           | 4B |       |       |      | NoAmplification             |
| oprJ           | 4B | 30.39 | 91.08 | 1.8  | LowEfficiency, CtIsLarge, M |
| pbp            | 4B |       |       |      | NoAmplification             |
| pbp2x          | 4B | 20.05 | 75.92 | 2.09 |                             |
| Pbp5           | 4B |       |       |      | NoAmplification             |
| penA           | 4B | 32.83 | 91.61 | 1.87 | CtIsLarge                   |
| pikR1          | 4B |       |       |      | LowEfficiency, CtIsLarge, C |
| pikR2          | 4B |       |       |      | NoAmplification             |
| pmrA           | 4B |       |       |      | NoAmplification             |
| pncA           | 4B |       |       |      | NoAmplification             |
| putative multi | 4B | 29.15 | 84.05 | 2    |                             |
| qac            | 4B |       |       |      | NoAmplification             |
| qacA           | 4B |       |       |      | BadR2, LowEfficiency, CtIsS |
| qacA/qacB      | 4B |       |       |      | NoAmplification             |
| qacEdelta1-0   | 4B |       |       |      | LowEfficiency, CtIsSmall, S |
| qacEdelta1-0   | 4B | 34.89 | 75.68 | 1.92 | CtIsLarge                   |
| qacH-01        | 4B | 30.15 | 86.84 | 1.96 | CtIsLarge                   |
| qacH-02        | 4B |       |       |      | LowEfficiency, CtIsLarge, C |
| qnrA           | 4B |       |       |      | CtIsLarge, CurveFitFailed   |

|              |    |       |       |      |                              |
|--------------|----|-------|-------|------|------------------------------|
| rarD-02      | 4B |       |       |      | LowEfficiency, CtIsLarge, Ci |
| sat4         | 4B |       |       |      | LowEfficiency, CtIsSmall, Ci |
| sdeB         | 4B |       |       |      | CtIsLarge, CurveFitFailed    |
| spcN-01      | 4B |       |       |      | LowEfficiency, CtIsLarge, Ci |
| speA         | 4B |       |       |      | NoAmplification              |
| str          | 4B |       |       |      | NoAmplification              |
| strA         | 4B |       |       |      | NoAmplification              |
| strB         | 4B |       |       |      | NoAmplification              |
| sul1         | 4B | 31.54 | 89.6  | 1.86 | CtIsLarge, SaturationBaseli  |
| sul2         | 4B |       |       |      | NoAmplification              |
| sulA/foIP-01 | 4B | 17.76 | 81.04 | 2.02 |                              |
| sulA/foIP-03 | 4B | 18.76 | 82.8  | 2.02 |                              |
| tet(32)      | 4B | 25.29 | 81.45 | 1.99 |                              |
| tet(34)      | 4B | 33.74 | 74.92 | 1.83 | CtIsLarge                    |
| tet(35)      | 4B | 32.05 | 76.55 | 2    | CtIsLarge, MultipleMeltPea   |
| tet(36)-A    | 4B | 32.69 | 81.92 | 2    | CtIsLarge                    |
| tet(36)-B    | 4B | 34.94 | 82.91 | 1.79 | LowEfficiency, CtIsLarge     |
| tet(37)      | 4B | 23.01 | 75.73 | 1.98 | MultipleMeltPeaks            |
| tetA-01      | 4B | 19.09 | 83.08 | 1.98 | MultipleMeltPeaks            |
| tetA-02      | 4B | 34    | 89.95 | 1.78 | LowEfficiency, CtIsLarge     |
| tetB-01      | 4B | 23.14 | 79.73 | 1.98 |                              |
| tetB-02      | 4B | 22.73 | 79.63 | 2.01 |                              |
| tetC-01      | 4B | 24.71 | 75.33 | 1.97 |                              |
| tetC-02      | 4B | 22.7  | 76.01 | 2.09 |                              |
| tetD-01      | 4B |       |       |      | LowEfficiency, CtIsSmall, Ci |
| tetD-02      | 4B | 34.7  | 76.54 | 2.09 | CtIsLarge                    |
| tetE         | 4B |       |       |      | NoAmplification              |
| tetG-01      | 4B |       |       |      | NoAmplification              |
| tetG-02      | 4B |       |       |      | CurveFitFailed               |
| tetH         | 4B |       |       |      | NoAmplification              |
| tetJ         | 4B |       |       |      | LowEfficiency, CtIsSmall, S: |
| tetK         | 4B |       |       |      | NoAmplification              |
| tetL-01      | 4B |       |       |      | LowEfficiency, CtIsSmall, S: |
| tetL-02      | 4B |       |       |      | NoAmplification              |
| tetM-01      | 4B |       |       |      | CurveFitFailed               |
| tetM-02      | 4B |       |       |      | CtIsLarge, CurveFitFailed    |
| tetO-01      | 4B | 23.41 | 76.74 | 2.07 |                              |
| tetPA        | 4B |       |       |      | NoAmplification              |
| tetPB-01     | 4B |       |       |      | NoAmplification              |
| tetPB-02     | 4B | 28.86 | 84.91 | 2.04 |                              |
| tetPB-03     | 4B |       |       |      | NoAmplification              |
| tetPB-05     | 4B |       |       |      | CtIsLarge, CurveFitFailed    |
| tetQ         | 4B | 22    | 76.37 | 2.04 |                              |
| tetR-02      | 4B | 31.34 | 89.97 | 1.89 | CtIsLarge                    |
| tetR-03      | 4B | 23.29 | 76.13 | 2.02 |                              |
| tetS         | 4B |       |       |      | CtIsLarge, CurveFitFailed    |

|             |    |       |       |      |                              |
|-------------|----|-------|-------|------|------------------------------|
| tetT        | 4B |       |       |      | NoAmplification              |
| tetU-01     | 4B |       |       |      | CurveFitFailed               |
| tetV        | 4B |       |       |      | NoAmplification              |
| tetW-01     | 4B |       |       |      | NoAmplification              |
| tetX        | 4B | 30.21 | 81.68 | 2.02 | CtIsLarge, MultipleMeltPea   |
| tnpA-01     | 4B |       |       |      | CtIsLarge, CurveFitFailed    |
| tnpA-02     | 4B |       |       |      | CtIsLarge, CurveFitFailed    |
| tnpA-03     | 4B | 33.34 | 74.82 | 2.1  | CtIsLarge                    |
| tnpA-04     | 4B | 30.43 | 76    | 1.95 | CtIsLarge                    |
| tnpA-05     | 4B |       |       |      | CtIsLarge, CurveFitFailed    |
| tnpA-07     | 4B |       |       |      | NoAmplification              |
| tolC-01     | 4B |       |       |      | LowEfficiency, CtIsLarge, Ci |
| tolC-02     | 4B | 31.48 | 87.67 | 1.98 | CtIsLarge, MultipleMeltPea   |
| tolC-03     | 4B | 29.04 | 85.68 | 1.98 |                              |
| Tp614       | 4B | 33.14 | 72.74 | 1.97 | CtIsLarge, MultipleMeltPea   |
| ttgA        | 4B |       |       |      | LowEfficiency, CtIsLarge, Ci |
| ttgB        | 4B |       |       |      | CtIsLarge, CurveFitFailed    |
| vanA        | 4B |       |       |      | NoAmplification              |
| vanB-01     | 4B | 31.01 | 88.55 | 1.98 | CtIsLarge                    |
| vanC-01     | 4B |       |       |      | CtIsLarge, CurveFitFailed    |
| vanC-02     | 4B |       |       |      | LowEfficiency, CtIsSmall, Se |
| vanC-03     | 4B | 25.64 | 86.38 | 1.97 |                              |
| vanC1       | 4B |       |       |      | BadR2, LowEfficiency, CtIsS  |
| vanC2/vanC3 | 4B | 33.86 | 81.23 | 1.75 | LowEfficiency, CtIsLarge, M  |
| vanG        | 4B |       |       |      | NoAmplification              |
| vanHB       | 4B |       |       |      | NoAmplification              |
| vanHD       | 4B | 32.97 | 82.38 | 1.91 | CtIsLarge, MultipleMeltPea   |
| vanRA-01    | 4B |       |       |      | NoAmplification              |
| vanRA-02    | 4B |       |       |      | NoAmplification              |
| vanRB       | 4B |       |       |      | NoAmplification              |
| vanRC       | 4B |       |       |      | LowEfficiency, CtIsSmall, Ci |
| vanRC4      | 4B |       |       |      | NoAmplification              |
| vanRD       | 4B |       |       |      | NoAmplification              |
| vanSA       | 4B |       |       |      | NoAmplification              |
| vanSB       | 4B | 27.45 | 74.9  | 2.07 |                              |
| vanSC-01    | 4B |       |       |      | NoAmplification              |
| vanSC-02    | 4B |       |       |      | NoAmplification              |
| vanTC-01    | 4B |       |       |      | NoAmplification              |
| vanTC-02    | 4B | 34.03 | 86.65 | 1.74 | LowEfficiency, CtIsLarge     |
| vanTE       | 4B |       |       |      | NoAmplification              |
| vanTG       | 4B |       |       |      | NoAmplification              |
| vanWB       | 4B |       |       |      | NoAmplification              |
| vanWG       | 4B |       |       |      | CurveFitFailed               |
| vanXA       | 4B |       |       |      | LowEfficiency, CurveFitFail  |
| vanXB       | 4B |       |       |      | NoAmplification              |
| vanXD       | 4B | 29.41 | 75.23 | 2.03 |                              |

|              |    |       |       |      |                              |
|--------------|----|-------|-------|------|------------------------------|
| vanYB        | 4B |       |       |      | CtIsLarge, CurveFitFailed    |
| vanYD-01     | 4B |       |       |      | LowEfficiency, CurveFitFail  |
| vanYD-02     | 4B |       |       |      | CtIsLarge, CurveFitFailed    |
| vatB-01      | 4B |       |       |      | CtIsLarge, CurveFitFailed    |
| vatB-02      | 4B |       |       |      | NoAmplification              |
| vatC-01      | 4B |       |       |      | CtIsLarge, CurveFitFailed    |
| vatC-02      | 4B |       |       |      | NoAmplification              |
| vatE-01      | 4B | 28.98 | 77.16 | 2.1  |                              |
| vatE-02      | 4B |       |       |      | NoAmplification              |
| vgaA-01      | 4B |       |       |      | LowEfficiency, CtIsLarge, C  |
| vgaA-02      | 4B |       |       |      | LowEfficiency, SaturationB:  |
| vgb-01       | 4B | 32.5  | 83.37 | 1.91 | CtIsLarge                    |
| vgbB-01      | 4B |       |       |      | NoAmplification              |
| vgbB-02      | 4B |       |       |      | NoAmplification              |
| yceE/mdtG-0  | 4B |       |       |      | LowEfficiency, CtIsLarge, C  |
| yceE/mdtG-0  | 4B |       |       |      | CtIsLarge, CurveFitFailed    |
| yceL/mdtH-0  | 4B | 31.33 | 85.21 | 1.85 | CtIsLarge, MultipleMeltPez   |
| yceL/mdtH-0  | 4B |       |       |      | NoAmplification              |
| yceL/mdtH-0  | 4B | 33.27 | 77.83 | 1.94 | CtIsLarge                    |
| yidY/mdtL-01 | 4B | 31.28 | 90.34 | 2.01 | CtIsLarge                    |
| yidY/mdtL-02 | 4B |       |       |      | LowEfficiency, CtIsSmall, S: |































| Assay          | Sample | Ct    | Tm    | Efficiency | flag                         |
|----------------|--------|-------|-------|------------|------------------------------|
| 16S rRNA       | 4C     |       | 14.83 | 81.82      | 1.98                         |
| aac            | 4C     | 32.73 |       | 87.67      | 2.05 CtlIsLarge              |
| aac(6')-Ib(akz | 4C     |       |       |            | CurveFitFailed               |
| aac(6')-Ib(akz | 4C     |       |       |            | CurveFitFailed               |
| aac(6')-Ib(akz | 4C     |       |       |            | NoAmplification              |
| aac(6')-II     | 4C     |       |       |            | NoAmplification              |
| aac(6')I1      | 4C     |       |       |            | LowEfficiency, CtlIsLarge, C |
| aacA/aphD      | 4C     |       |       |            | NoAmplification              |
| aacC           | 4C     |       |       |            | CtlIsLarge, CurveFitFailed   |
| aacC1          | 4C     |       |       |            | NoAmplification              |
| aacC2          | 4C     |       |       |            | NoAmplification              |
| aacC4          | 4C     | 34.21 | 87.62 | 1.79       | LowEfficiency, CtlIsLarge, M |
| aadA-01        | 4C     |       |       |            | CurveFitFailed               |
| aadA-02        | 4C     |       |       |            | CurveFitFailed               |
| aadA-1-01      | 4C     |       |       |            | NoAmplification              |
| aadA-1-02      | 4C     |       |       |            | NoAmplification              |
| aadA1          | 4C     |       |       |            | NoAmplification              |
| aadA2-01       | 4C     |       |       |            | NoAmplification              |
| aadA2-02       | 4C     |       |       |            | NoAmplification              |
| aadA2-03       | 4C     |       |       |            | NoAmplification              |
| aadA5-01       | 4C     |       |       |            | NoAmplification              |
| aadA5-02       | 4C     |       |       |            | CtlIsLarge, CurveFitFailed   |
| aadA9-01       | 4C     |       |       |            | CtlIsLarge, CurveFitFailed   |
| aadA9-02       | 4C     |       |       |            | CtlIsLarge, CurveFitFailed   |
| aadD           | 4C     |       |       |            | NoAmplification              |
| aadE           | 4C     |       |       |            | NoAmplification              |
| acrA-01        | 4C     |       |       |            | CurveFitFailed               |
| acrA-02        | 4C     |       |       |            | CurveFitFailed               |
| acrA-03        | 4C     |       |       |            | CurveFitFailed               |
| acrA-04        | 4C     |       |       |            | CtlIsLarge, CurveFitFailed   |
| acrA-05        | 4C     | 29.33 | 83.73 | 1.9        |                              |
| acrB-01        | 4C     |       |       |            | CtlIsLarge, CurveFitFailed   |
| acrF           | 4C     | 27.26 | 81.99 | 1.62       | LowEfficiency                |
| acrR-01        | 4C     |       |       |            | LowEfficiency, CtlIsLarge, C |
| acrR-02        | 4C     |       |       |            | NoAmplification              |
| Actin          | 4C     | 24.81 | 87.06 | 1.91       |                              |
| adeA           | 4C     |       |       |            | LowEfficiency, CtlIsLarge, C |
| ampC-01        | 4C     | 33.61 | 80.28 | 1.93       | CtlIsLarge                   |
| ampC-02        | 4C     |       |       |            | NoAmplification              |
| ampC-04        | 4C     |       |       |            | CtlIsLarge, CurveFitFailed   |
| ampC-05        | 4C     |       |       |            | NoAmplification              |
| ampC-06        | 4C     |       |       |            | LowEfficiency, CtlIsLarge, C |
| ampC-07        | 4C     |       |       |            | NoAmplification              |
| ampC-09        | 4C     |       |       |            | BadR2, CtlIsLarge, CurveFit  |
| ampC/blaDH     | 4C     |       |       |            | LowEfficiency, CtlIsLarge, C |

|                          |    |       |       |      |                                          |
|--------------------------|----|-------|-------|------|------------------------------------------|
| aph                      | 4C |       |       |      | CurveFitFailed                           |
| aph(2')-Id-01            | 4C |       |       |      | NoAmplification                          |
| aph(2')-Id-02            | 4C |       |       |      | LowEfficiency, CtIsSmall, C              |
| aph6ia                   | 4C |       |       |      | LowEfficiency, CtIsLarge, C              |
| aphA1(aka k <sub>z</sub> | 4C |       |       |      | NoAmplification                          |
| bacA-01                  | 4C |       |       |      | CtIsLarge, CurveFitFailed                |
| bacA-02                  | 4C |       |       |      | LowEfficiency, CtIsSmall, S <sub>e</sub> |
| BETA-globin              | 4C | 24.58 | 84.05 | 1.94 |                                          |
| bla-ACC-1                | 4C |       |       |      | NoAmplification                          |
| bla-L1                   | 4C | 31.61 | 86.28 | 1.89 | CtIsLarge                                |
| bla1                     | 4C |       |       |      | LowEfficiency, CtIsSmall, S <sub>e</sub> |
| blaCMY                   | 4C |       |       |      | CtIsLarge, CurveFitFailed                |
| blaCMY2-01               | 4C |       |       |      | NoAmplification                          |
| blaCMY2-02               | 4C | 32.42 | 83.54 | 1.91 | CtIsLarge                                |
| blaCTX-M-01              | 4C |       |       |      | NoAmplification                          |
| blaCTX-M-02              | 4C |       |       |      | LowEfficiency, CtIsLarge, C              |
| blaCTX-M-03              | 4C |       |       |      | NoAmplification                          |
| blaCTX-M-04              | 4C | 31.97 | 84.52 | 1.92 | CtIsLarge, MultipleMeltPe <sub>z</sub>   |
| blaCTX-M-05              | 4C | 29.94 | 76.26 | 1.79 | LowEfficiency, CtIsLarge, S <sub>e</sub> |
| blaCTX-M-06              | 4C |       |       |      | NoAmplification                          |
| blaGES                   | 4C |       |       |      | NoAmplification                          |
| blaIMP-01                | 4C |       |       |      | NoAmplification                          |
| blaIMP-02                | 4C |       |       |      | LowEfficiency, CtIsSmall, S <sub>e</sub> |
| blaMOX/blaC              | 4C |       |       |      | NoAmplification                          |
| blaOCH                   | 4C |       |       |      | NoAmplification                          |
| blaOKP                   | 4C |       |       |      | NoAmplification                          |
| blaOXA1/blaC             | 4C |       |       |      | NoAmplification                          |
| blaOXA10-01              | 4C |       |       |      | NoAmplification                          |
| blaOXA10-02              | 4C |       |       |      | CurveFitFailed                           |
| blaOXY                   | 4C |       |       |      | LowEfficiency, CtIsLarge, C              |
| blaPAO                   | 4C |       |       |      | NoAmplification                          |
| blaPER                   | 4C |       |       |      | NoAmplification                          |
| blaPSE                   | 4C |       |       |      | NoAmplification                          |
| blaROB                   | 4C |       |       |      | CurveFitFailed                           |
| blaSFO                   | 4C | 33.53 | 80.38 | 1.91 | CtIsLarge, MultipleMeltPe <sub>z</sub>   |
| blaSHV-01                | 4C |       |       |      | NoAmplification                          |
| blaSHV-02                | 4C |       |       |      | NoAmplification                          |
| blaTEM                   | 4C | 17.9  | 79.31 | 1.96 |                                          |
| blaTLA                   | 4C |       |       |      | NoAmplification                          |
| blaVEB                   | 4C |       |       |      | NoAmplification                          |
| blaVIM                   | 4C | 31.54 | 87.44 | 1.92 | CtIsLarge                                |
| blaZ                     | 4C |       |       |      | LowEfficiency, CtIsSmall, S <sub>e</sub> |
| carB                     | 4C |       |       |      | NoAmplification                          |
| catA1                    | 4C |       |       |      | NoAmplification                          |
| catB3                    | 4C |       |       |      | NoAmplification                          |
| catB8                    | 4C | 31.38 | 82.73 | 1.97 | CtIsLarge                                |

|            |    |       |       |      |                             |
|------------|----|-------|-------|------|-----------------------------|
| ceoA       | 4C | 31.63 | 88.24 | 1.97 | CtIsLarge, MultipleMeltPe   |
| cepA       | 4C |       |       |      | NoAmplification             |
| cfiA       | 4C | 34.92 | 79.42 | 1.89 | CtIsLarge, SaturationBaseli |
| cfr        | 4C |       |       |      | CurveFitFailed              |
| cfxA       | 4C | 25.25 | 77.26 | 2.03 |                             |
| cmeA       | 4C |       |       |      | BadR2, LowEfficiency, CtIsS |
| cmlA1-01   | 4C | 34.19 | 87.5  | 1.92 | CtIsLarge                   |
| cmlA1-02   | 4C |       |       |      | NoAmplification             |
| cmr        | 4C |       |       |      | NoAmplification             |
| cmx(A)     | 4C | 30.34 | 85.51 | 1.94 | CtIsLarge                   |
| cphA-01    | 4C | 33.14 | 87.68 | 1.82 | CtIsLarge                   |
| cphA-02    | 4C |       |       |      | LowEfficiency, CtIsLarge, C |
| dfrA1      | 4C |       |       |      | NoAmplification             |
| dfrA12     | 4C |       |       |      | NoAmplification             |
| emrD       | 4C |       |       |      | CurveFitFailed              |
| ereA       | 4C |       |       |      | CurveFitFailed              |
| ereB       | 4C |       |       |      | LowEfficiency, CtIsLarge, C |
| erm(34)    | 4C |       |       |      | NoAmplification             |
| erm(35)    | 4C |       |       |      | NoAmplification             |
| erm(36)    | 4C | 33.55 | 87.06 | 2.05 | CtIsLarge                   |
| ermA       | 4C |       |       |      | LowEfficiency, CtIsSmall, S |
| ermA/ermTR | 4C |       |       |      | NoAmplification             |
| ermB       | 4C | 16.44 | 75.26 | 2.11 |                             |
| ermC       | 4C |       |       |      | LowEfficiency, CtIsSmall, S |
| ermF       | 4C | 33.57 | 71.67 | 2.03 | CtIsLarge                   |
| ermJ/ermD  | 4C |       |       |      | NoAmplification             |
| ermK-01    | 4C |       |       |      | CtIsLarge, CurveFitFailed   |
| ermK-02    | 4C |       |       |      | NoAmplification             |
| ermT-01    | 4C |       |       |      | NoAmplification             |
| ermT-02    | 4C |       |       |      | CtIsLarge, CurveFitFailed   |
| ermX       | 4C |       |       |      | NoAmplification             |
| ermY       | 4C |       |       |      | NoAmplification             |
| fabK       | 4C | 19.32 | 77.42 | 2.11 |                             |
| floR       | 4C |       |       |      | NoAmplification             |
| folA       | 4C |       |       |      | NoAmplification             |
| fosB       | 4C |       |       |      | LowEfficiency, CtIsSmall, S |
| fosX       | 4C |       |       |      | NoAmplification             |
| fox5       | 4C | 30.97 | 86.77 | 1.96 | CtIsLarge                   |
| imiR       | 4C |       |       |      | NoAmplification             |
| ImrA-01    | 4C |       |       |      | NoAmplification             |
| intl       | 4C | 34.15 | 87.21 | 1.77 | LowEfficiency, CtIsLarge, M |
| intl1      | 4C | 22.86 | 87.1  | 1.98 |                             |
| IS613      | 4C | 24.35 | 79.54 | 1.78 | LowEfficiency               |
| lnuA-01    | 4C |       |       |      | CurveFitFailed              |
| lnuB-01    | 4C |       |       |      | LowEfficiency, CtIsSmall, C |
| lnuB-02    | 4C |       |       |      | NoAmplification             |

|                |    |       |       |      |                             |
|----------------|----|-------|-------|------|-----------------------------|
| lnuC           | 4C |       |       |      | CtIsLarge, CurveFitFailed   |
| marR-01        | 4C |       |       |      | LowEfficiency, CtIsLarge, C |
| matA/mel       | 4C | 20.48 | 77.75 | 2.04 |                             |
| mdet1          | 4C |       |       |      | NoAmplification             |
| mdtA           | 4C |       |       |      | CurveFitFailed              |
| mdtE/yhiU      | 4C |       |       |      | CurveFitFailed              |
| mecA           | 4C |       |       |      | NoAmplification             |
| mefA           | 4C | 19.34 | 80.67 | 1.88 |                             |
| mepA           | 4C |       |       |      | LowEfficiency, CtIsLarge, C |
| mexA           | 4C |       |       |      | CurveFitFailed              |
| mexD           | 4C | 32.85 | 79.94 | 2.04 | CtIsLarge                   |
| mexE           | 4C |       |       |      | CurveFitFailed              |
| mexF           | 4C | 29.52 | 80.17 | 1.99 | CtIsLarge, MultipleMeltPea  |
| mphA-01        | 4C | 33.37 | 86.83 | 1.96 | CtIsLarge                   |
| mphA-02        | 4C | 34.55 | 89.26 | 2.03 | CtIsLarge                   |
| mphB           | 4C |       |       |      | NoAmplification             |
| mphC           | 4C |       |       |      | NoAmplification             |
| msrA-01        | 4C |       |       |      | NoAmplification             |
| msrC-01        | 4C |       |       |      | NoAmplification             |
| mtrC-01        | 4C |       |       |      | CtIsLarge, CurveFitFailed   |
| mtrC-02        | 4C |       |       |      | NoAmplification             |
| mtrD-02        | 4C | 29.76 | 81.79 | 1.98 | CtIsLarge                   |
| mtrD-03        | 4C |       |       |      | NoAmplification             |
| NDM1           | 4C |       |       |      | NoAmplification             |
| nimE           | 4C |       |       |      | NoAmplification             |
| nisB           | 4C |       |       |      | NoAmplification             |
| oleC           | 4C | 32.16 | 88.71 | 1.87 | CtIsLarge                   |
| oprD           | 4C | 29.27 | 85.16 | 2.03 | MultipleMeltPeaks           |
| oprJ           | 4C | 32.36 | 88.45 | 1.89 | CtIsLarge                   |
| pbp            | 4C |       |       |      | NoAmplification             |
| pbp2x          | 4C | 18.16 | 76.49 | 2    |                             |
| Pbp5           | 4C |       |       |      | NoAmplification             |
| penA           | 4C |       |       |      | NoAmplification             |
| pikR1          | 4C |       |       |      | NoAmplification             |
| pikR2          | 4C |       |       |      | CurveFitFailed              |
| pmrA           | 4C | 18.68 | 79.66 | 2.1  |                             |
| pncA           | 4C | 32.54 | 88.38 | 1.86 | CtIsLarge                   |
| putative multi | 4C |       |       |      | CurveFitFailed              |
| qac            | 4C |       |       |      | CtIsLarge, CurveFitFailed   |
| qacA           | 4C |       |       |      | CurveFitFailed              |
| qacA/qacB      | 4C |       |       |      | NoAmplification             |
| qacEdelta1-0   | 4C |       |       |      | NoAmplification             |
| qacEdelta1-0   | 4C | 30.4  | 79.97 | 1.99 | CtIsLarge                   |
| qacH-01        | 4C |       |       |      | CurveFitFailed              |
| qacH-02        | 4C |       |       |      | NoAmplification             |
| qnrA           | 4C |       |       |      | NoAmplification             |



|              |    |       |       |      |                              |
|--------------|----|-------|-------|------|------------------------------|
| rarD-02      | 4C |       |       |      | CurveFitFailed               |
| sat4         | 4C |       |       |      | NoAmplification              |
| sdeB         | 4C |       |       |      | CurveFitFailed               |
| spcN-01      | 4C |       |       |      | NoAmplification              |
| speA         | 4C |       |       |      | NoAmplification              |
| str          | 4C | 28.6  | 72.47 | 2.03 |                              |
| strA         | 4C |       |       |      | NoAmplification              |
| strB         | 4C |       |       |      | NoAmplification              |
| sul1         | 4C |       |       |      | NoAmplification              |
| sul2         | 4C |       |       |      | NoAmplification              |
| sulA/foIP-01 | 4C | 18.77 | 81.99 | 1.97 |                              |
| sulA/foIP-03 | 4C | 17.27 | 83.93 | 2.01 |                              |
| tet(32)      | 4C | 34.48 | 89.16 | 1.86 | CtIsLarge                    |
| tet(34)      | 4C | 32.77 | 75.36 | 1.95 | CtIsLarge                    |
| tet(35)      | 4C | 32.11 | 77.03 | 2    | CtIsLarge                    |
| tet(36)-A    | 4C | 30.42 | 72.48 | 2.08 | CtIsLarge                    |
| tet(36)-B    | 4C |       |       |      | CtIsLarge, CurveFitFailed    |
| tet(37)      | 4C | 25.06 | 76.63 | 1.96 |                              |
| tetA-01      | 4C | 17.74 | 76.52 | 1.99 | MultipleMeltPeaks            |
| tetA-02      | 4C |       |       |      | CurveFitFailed               |
| tetB-01      | 4C |       |       |      | CtIsLarge, CurveFitFailed    |
| tetB-02      | 4C |       |       |      | BadR2, LowEfficiency, CtIsS  |
| tetC-01      | 4C |       |       |      | NoAmplification              |
| tetC-02      | 4C |       |       |      | NoAmplification              |
| tetD-01      | 4C |       |       |      | NoAmplification              |
| tetD-02      | 4C |       |       |      | NoAmplification              |
| tetE         | 4C |       |       |      | NoAmplification              |
| tetG-01      | 4C |       |       |      | LowEfficiency, CtIsSmall, S: |
| tetG-02      | 4C |       |       |      | CurveFitFailed               |
| tetH         | 4C |       |       |      | CurveFitFailed               |
| tetJ         | 4C |       |       |      | CurveFitFailed               |
| tetK         | 4C |       |       |      | CurveFitFailed               |
| tetL-01      | 4C |       |       |      | LowEfficiency, CtIsSmall, S: |
| tetL-02      | 4C |       |       |      | LowEfficiency, CtIsSmall, S: |
| tetM-01      | 4C |       |       |      | LowEfficiency, CtIsSmall, S: |
| tetM-02      | 4C | 17.77 | 77.49 | 2.03 |                              |
| tetO-01      | 4C | 28.54 | 76.56 | 2.03 |                              |
| tetPA        | 4C |       |       |      | NoAmplification              |
| tetPB-01     | 4C |       |       |      | NoAmplification              |
| tetPB-02     | 4C |       |       |      | LowEfficiency, CtIsLarge, C  |
| tetPB-03     | 4C |       |       |      | NoAmplification              |
| tetPB-05     | 4C |       |       |      | NoAmplification              |
| tetQ         | 4C | 27.43 | 76.48 | 2.09 |                              |
| tetR-02      | 4C | 31.14 | 84.04 | 1.92 | CtIsLarge                    |
| tetR-03      | 4C |       |       |      | NoAmplification              |
| tetS         | 4C |       |       |      | CtIsLarge, CurveFitFailed    |

|             |    |       |       |      |                             |
|-------------|----|-------|-------|------|-----------------------------|
| tetT        | 4C |       |       |      | NoAmplification             |
| tetU-01     | 4C |       |       |      | NoAmplification             |
| tetV        | 4C |       |       |      | NoAmplification             |
| tetW-01     | 4C |       |       |      | CurveFitFailed              |
| tetX        | 4C |       |       |      | CurveFitFailed              |
| tnpA-01     | 4C |       |       |      | BadR2, LowEfficiency, CtIsS |
| tnpA-02     | 4C | 29.03 | 84.74 | 1.79 | LowEfficiency               |
| tnpA-03     | 4C | 32.42 | 75.09 | 2.12 | CtIsLarge                   |
| tnpA-04     | 4C |       |       |      | NoAmplification             |
| tnpA-05     | 4C | 27.99 | 80.68 | 1.94 |                             |
| tnpA-07     | 4C |       |       |      | NoAmplification             |
| tolC-01     | 4C |       |       |      | CurveFitFailed              |
| tolC-02     | 4C | 32.07 | 82.67 | 1.91 | CtIsLarge, MultipleMeltPe   |
| tolC-03     | 4C |       |       |      | LowEfficiency, CtIsLarge, C |
| Tp614       | 4C |       |       |      | NoAmplification             |
| ttgA        | 4C |       |       |      | NoAmplification             |
| ttgB        | 4C |       |       |      | BadR2, LowEfficiency, CtIsS |
| vanA        | 4C |       |       |      | NoAmplification             |
| vanB-01     | 4C | 31.72 | 90.38 | 1.98 | CtIsLarge                   |
| vanC-01     | 4C |       |       |      | CurveFitFailed              |
| vanC-02     | 4C |       |       |      | NoAmplification             |
| vanC-03     | 4C | 30.69 | 91.6  | 1.91 | CtIsLarge, MultipleMeltPe   |
| vanC1       | 4C |       |       |      | NoAmplification             |
| vanC2/vanC3 | 4C |       |       |      | CtIsLarge, CurveFitFailed   |
| vanG        | 4C |       |       |      | NoAmplification             |
| vanHB       | 4C |       |       |      | NoAmplification             |
| vanHD       | 4C |       |       |      | CtIsLarge, CurveFitFailed   |
| vanRA-01    | 4C |       |       |      | NoAmplification             |
| vanRA-02    | 4C | 34.5  | 77.34 | 1.9  | CtIsLarge                   |
| vanRB       | 4C |       |       |      | CtIsLarge, CurveFitFailed   |
| vanRC       | 4C |       |       |      | LowEfficiency, CtIsSmall, S |
| vanRC4      | 4C |       |       |      | LowEfficiency, CtIsSmall, S |
| vanRD       | 4C |       |       |      | NoAmplification             |
| vanSA       | 4C |       |       |      | NoAmplification             |
| vanSB       | 4C | 27.39 | 74.73 | 2.06 |                             |
| vanSC-01    | 4C |       |       |      | NoAmplification             |
| vanSC-02    | 4C |       |       |      | NoAmplification             |
| vanTC-01    | 4C |       |       |      | NoAmplification             |
| vanTC-02    | 4C |       |       |      | LowEfficiency, CtIsLarge, C |
| vanTE       | 4C |       |       |      | NoAmplification             |
| vanTG       | 4C |       |       |      | NoAmplification             |
| vanWB       | 4C |       |       |      | NoAmplification             |
| vanWG       | 4C |       |       |      | CtIsLarge, CurveFitFailed   |
| vanXA       | 4C |       |       |      | NoAmplification             |
| vanXB       | 4C |       |       |      | NoAmplification             |
| vanXD       | 4C | 29.37 | 75.01 | 2.03 |                             |

|              |    |       |       |      |                             |
|--------------|----|-------|-------|------|-----------------------------|
| vanYB        | 4C |       |       |      | CtIsLarge, CurveFitFailed   |
| vanYD-01     | 4C | 34.05 | 80.76 | 1.79 | LowEfficiency, CtIsLarge, M |
| vanYD-02     | 4C |       |       |      | NoAmplification             |
| vatB-01      | 4C |       |       |      | NoAmplification             |
| vatB-02      | 4C |       |       |      | LowEfficiency, CtIsSmall, S |
| vatC-01      | 4C |       |       |      | NoAmplification             |
| vatC-02      | 4C |       |       |      | CtIsLarge, CurveFitFailed   |
| vatE-01      | 4C | 28.76 | 77.5  | 2.08 |                             |
| vatE-02      | 4C |       |       |      | NoAmplification             |
| vgaA-01      | 4C |       |       |      | CtIsLarge, CurveFitFailed   |
| vgaA-02      | 4C |       |       |      | CurveFitFailed              |
| vgb-01       | 4C |       |       |      | NoAmplification             |
| vgbB-01      | 4C |       |       |      | CurveFitFailed              |
| vgbB-02      | 4C |       |       |      | NoAmplification             |
| yceE/mdtG-0  | 4C |       |       |      | NoAmplification             |
| yceE/mdtG-0  | 4C |       |       |      | NoAmplification             |
| yceL/mdtH-0  | 4C |       |       |      | LowEfficiency, CtIsLarge, C |
| yceL/mdtH-0  | 4C |       |       |      | NoAmplification             |
| yceL/mdtH-0  | 4C |       |       |      | CurveFitFailed              |
| yidY/mdtL-01 | 4C |       |       |      | LowEfficiency, CtIsLarge, C |
| yidY/mdtL-02 | 4C | 34.75 | 75.22 | 1.98 | CtIsLarge                   |































| Assay          | Sample | Ct    | Tm    | Efficiency | flag                            |
|----------------|--------|-------|-------|------------|---------------------------------|
| 16S rRNA       | 5A     |       | 15.37 | 80.97      | 2.11 SaturationBaselineRatiolsL |
| aac            | 5A     |       | 28.76 | 82.81      | 1.95 SaturationBaselineRatiolsL |
| aac(6')-Ib(akz | 5A     |       |       |            | NoAmplification                 |
| aac(6')-Ib(akz | 5A     | 31.89 | 86.16 | 1.97       | CtIsLarge, SaturationBaseli     |
| aac(6')-Ib(akz | 5A     | 32.2  | 87.08 | 1.85       | CtIsLarge, SaturationBaseli     |
| aac(6')-II     | 5A     | 33.95 | 85.64 | 1.65       | LowEfficiency, CtIsLarge, S:    |
| aac(6')I1      | 5A     |       |       |            | NoAmplification                 |
| aacA/aphD      | 5A     |       |       |            | NoAmplification                 |
| aacC           | 5A     | 32.37 | 91.69 | 1.61       | LowEfficiency, CtIsLarge, S:    |
| aacC1          | 5A     |       |       |            | NoAmplification                 |
| aacC2          | 5A     |       |       |            | NoAmplification                 |
| aacC4          | 5A     | 32.6  | 90.78 | 1.66       | LowEfficiency, CtIsLarge, S:    |
| aadA-01        | 5A     |       |       |            | NoAmplification                 |
| aadA-02        | 5A     |       |       |            | NoAmplification                 |
| aadA-1-01      | 5A     | 34.36 | 86.94 | 1.88       | CtIsLarge, SaturationBaseli     |
| aadA-1-02      | 5A     |       |       |            | NoAmplification                 |
| aadA1          | 5A     | 32.55 | 82.93 | 1.97       | CtIsLarge, SaturationBaseli     |
| aadA2-01       | 5A     | 34.35 | 88.85 | 1.71       | LowEfficiency, CtIsLarge, S:    |
| aadA2-02       | 5A     | 30.92 | 74.9  | 1.9        | CtIsLarge, SaturationBaseli     |
| aadA2-03       | 5A     |       |       |            | NoAmplification                 |
| aadA5-01       | 5A     | 30.31 | 90.57 | 1.96       | CtIsLarge, SaturationBaseli     |
| aadA5-02       | 5A     | 31.11 | 88    | 1.99       | CtIsLarge, SaturationBaseli     |
| aadA9-01       | 5A     |       |       |            | NoAmplification                 |
| aadA9-02       | 5A     |       |       |            | NoAmplification                 |
| aadD           | 5A     |       |       |            | NoAmplification                 |
| aadE           | 5A     |       |       |            | NoAmplification                 |
| acrA-01        | 5A     | 29.92 | 88.54 | 1.93       | CtIsLarge, SaturationBaseli     |
| acrA-02        | 5A     |       |       |            | CtIsLarge, SaturationBaseli     |
| acrA-03        | 5A     |       |       |            | NoAmplification                 |
| acrA-04        | 5A     | 27.75 | 80.39 | 1.99       | SaturationBaselineRatiolsL      |
| acrA-05        | 5A     | 32.26 | 88.52 | 1.77       | LowEfficiency, CtIsLarge, S:    |
| acrB-01        | 5A     |       |       |            | NoAmplification                 |
| acrF           | 5A     | 27.81 | 84.05 | 1.71       | LowEfficiency, SaturationB:     |
| acrR-01        | 5A     | 32.6  | 90.51 | 1.94       | CtIsLarge, SaturationBaseli     |
| acrR-02        | 5A     | 33.64 | 88.47 | 2.07       | CtIsLarge, SaturationBaseli     |
| Actin          | 5A     | 18.29 | 86.78 | 1.93       | SaturationBaselineRatiolsL      |
| adeA           | 5A     | 33.95 | 82.49 | 1.73       | LowEfficiency, CtIsLarge, S:    |
| ampC-01        | 5A     | 31.5  | 85.18 | 1.72       | LowEfficiency, CtIsLarge, S:    |
| ampC-02        | 5A     |       |       |            | NoAmplification                 |
| ampC-04        | 5A     | 30.99 | 78.94 | 1.64       | LowEfficiency, CtIsLarge, S:    |
| ampC-05        | 5A     |       |       |            | NoAmplification                 |
| ampC-06        | 5A     |       |       |            | NoAmplification                 |
| ampC-07        | 5A     |       |       |            | NoAmplification                 |
| ampC-09        | 5A     |       |       |            | NoAmplification                 |
| ampC/blaDH,5A  | 5A     | 29.21 | 86.77 | 1.88       | SaturationBaselineRatiolsL      |

|                            |    |       |       |                                    |
|----------------------------|----|-------|-------|------------------------------------|
| aph                        | 5A |       |       | NoAmplification                    |
| aph(2')-Id-01              | 5A |       |       | NoAmplification                    |
| aph(2')-Id-02              | 5A |       |       | NoAmplification                    |
| aph6ia                     | 5A |       |       | NoAmplification                    |
| aphA1(aka k <sub>2</sub> ) | 5A |       |       | NoAmplification                    |
| bacA-01                    | 5A |       |       | NoAmplification                    |
| bacA-02                    | 5A | 31.45 | 89.1  | 2.05 CtlIsLarge, SaturationBaseli  |
| BETA-globin                | 5A | 19.61 | 84.01 | 2.01 SaturationBaselineRatiolsL    |
| bla-ACC-1                  | 5A |       |       | NoAmplification                    |
| bla-L1                     | 5A | 30.92 | 82.83 | 1.76 LowEfficiency, CtlIsLarge, S: |
| bla1                       | 5A |       |       | NoAmplification                    |
| blaCMY                     | 5A |       |       | NoAmplification                    |
| blaCMY2-01                 | 5A |       |       | NoAmplification                    |
| blaCMY2-02                 | 5A | 28.2  | 88.82 | 2.08 SaturationBaselineRatiolsL    |
| blaCTX-M-01                | 5A |       |       | NoAmplification                    |
| blaCTX-M-02                | 5A | 31.84 | 89.47 | 1.9 CtlIsLarge, SaturationBaseli   |
| blaCTX-M-03                | 5A |       |       | NoAmplification                    |
| blaCTX-M-04                | 5A | 34.06 | 87.28 | 1.84 CtlIsLarge, SaturationBaseli  |
| blaCTX-M-05                | 5A |       |       | LowEfficiency, CtlIsLarge, S:      |
| blaCTX-M-06                | 5A |       |       | NoAmplification                    |
| blaGES                     | 5A |       |       | NoAmplification                    |
| blaIMP-01                  | 5A |       |       | NoAmplification                    |
| blaIMP-02                  | 5A |       |       | NoAmplification                    |
| blaMOX/blaC                | 5A |       |       | NoAmplification                    |
| blaOCH                     | 5A |       |       | NoAmplification                    |
| blaOKP                     | 5A |       |       | NoAmplification                    |
| blaOXA1/blaC               | 5A |       |       | NoAmplification                    |
| blaOXA10-01                | 5A |       |       | NoAmplification                    |
| blaOXA10-02                | 5A |       |       | NoAmplification                    |
| blaOXY                     | 5A |       |       | NoAmplification                    |
| blaPAO                     | 5A |       |       | NoAmplification                    |
| blaPER                     | 5A |       |       | NoAmplification                    |
| blaPSE                     | 5A |       |       | NoAmplification                    |
| blaROB                     | 5A |       |       | NoAmplification                    |
| blaSFO                     | 5A | 30.7  | 89.39 | 1.77 LowEfficiency, CtlIsLarge, S: |
| blaSHV-01                  | 5A |       |       | NoAmplification                    |
| blaSHV-02                  | 5A |       |       | NoAmplification                    |
| blaTEM                     | 5A |       |       | NoAmplification                    |
| blaTLA                     | 5A |       |       | NoAmplification                    |
| blaVEB                     | 5A |       |       | NoAmplification                    |
| blaVIM                     | 5A |       |       | NoAmplification                    |
| blaZ                       | 5A |       |       | NoAmplification                    |
| carB                       | 5A |       |       | NoAmplification                    |
| catA1                      | 5A |       |       | NoAmplification                    |
| catB3                      | 5A | 30.94 | 87.53 | 1.99 CtlIsLarge, SaturationBaseli  |
| catB8                      | 5A | 29.12 | 84.81 | 2.09 SaturationBaselineRatiolsL    |

|            |    |       |       |      |                              |
|------------|----|-------|-------|------|------------------------------|
| ceoA       | 5A | 28.75 | 82.41 | 1.96 | SaturationBaselineRatiolsL   |
| cepA       | 5A |       |       |      | NoAmplification              |
| cfiA       | 5A |       |       |      | NoAmplification              |
| cfr        | 5A |       |       |      | NoAmplification              |
| cfxA       | 5A | 25.58 | 77.13 | 1.79 | LowEfficiency, SaturationB:  |
| cmeA       | 5A |       |       |      | NoAmplification              |
| cmlA1-01   | 5A |       |       |      | NoAmplification              |
| cmlA1-02   | 5A |       |       |      | CtIsLarge, SaturationBaseli  |
| cmr        | 5A |       |       |      | NoAmplification              |
| cmx(A)     | 5A | 27.26 | 84.65 | 2.18 | SaturationBaselineRatiolsL   |
| cphA-01    | 5A | 31.56 | 85.26 | 1.86 | CtIsLarge, SaturationBaseli  |
| cphA-02    | 5A |       |       |      | CtIsLarge, SaturationBaseli  |
| dfrA1      | 5A | 34.94 | 78.63 | 1.88 | CtIsLarge, SaturationBaseli  |
| dfrA12     | 5A |       |       |      | LowEfficiency, CtIsLarge, S: |
| emrD       | 5A |       |       |      | NoAmplification              |
| ereA       | 5A |       |       |      | CtIsLarge, SaturationBaseli  |
| ereB       | 5A | 34.2  | 88    | 1.99 | CtIsLarge, SaturationBaseli  |
| erm(34)    | 5A |       |       |      | NoAmplification              |
| erm(35)    | 5A |       |       |      | NoAmplification              |
| erm(36)    | 5A |       |       |      | NoAmplification              |
| ermA       | 5A |       |       |      | NoAmplification              |
| ermA/ermTR | 5A |       |       |      | NoAmplification              |
| ermB       | 5A | 27.24 | 74.4  | 1.98 | SaturationBaselineRatiolsL   |
| ermC       | 5A |       |       |      | NoAmplification              |
| ermF       | 5A |       |       |      | NoAmplification              |
| ermJ/ermD  | 5A |       |       |      | NoAmplification              |
| ermK-01    | 5A |       |       |      | NoAmplification              |
| ermK-02    | 5A | 32.49 | 85.29 | 1.77 | LowEfficiency, CtIsLarge, S: |
| ermT-01    | 5A |       |       |      | NoAmplification              |
| ermT-02    | 5A |       |       |      | CurveFitFailed               |
| ermX       | 5A | 31.49 | 87.85 | 1.89 | CtIsLarge, SaturationBaseli  |
| ermY       | 5A |       |       |      | NoAmplification              |
| fabK       | 5A | 26.83 | 78.92 | 2.29 | SaturationBaselineRatiolsL   |
| floR       | 5A |       |       |      | NoAmplification              |
| folA       | 5A |       |       |      | CtIsLarge, SaturationBaseli  |
| fosB       | 5A |       |       |      | NoAmplification              |
| fosX       | 5A |       |       |      | NoAmplification              |
| fox5       | 5A | 25.03 | 87.36 | 1.9  | SaturationBaselineRatiolsL   |
| imiR       | 5A |       |       |      | NoAmplification              |
| ImrA-01    | 5A |       |       |      | NoAmplification              |
| intl       | 5A | 30.22 | 84.69 | 1.59 | LowEfficiency, CtIsLarge, S: |
| intl1      | 5A | 19.43 | 87.45 | 2.23 | SaturationBaselineRatiolsL   |
| IS613      | 5A | 28.77 | 79.22 | 1.61 | LowEfficiency, SaturationB:  |
| lnuA-01    | 5A |       |       |      | NoAmplification              |
| lnuB-01    | 5A |       |       |      | NoAmplification              |
| lnuB-02    | 5A |       |       |      | NoAmplification              |

|               |    |       |       |                                   |
|---------------|----|-------|-------|-----------------------------------|
| lnuC          | 5A |       |       | CtIsLarge, SaturationBaseli       |
| marR-01       | 5A | 33.29 | 84.94 | 1.82 CtIsLarge, SaturationBaseli  |
| matA/mel      | 5A | 25.2  | 76.97 | 1.95 SaturationBaselineRatiolsL   |
| mdet1         | 5A |       |       | NoAmplification                   |
| mdtA          | 5A | 32.05 | 86    | 1.72 LowEfficiency, CtIsLarge, S: |
| mdtE/yhiU     | 5A |       |       | NoAmplification                   |
| mecA          | 5A |       |       | NoAmplification                   |
| mefA          | 5A | 24.52 | 80.33 | 1.82 SaturationBaselineRatiolsL   |
| mepA          | 5A | 31.64 | 87.56 | 1.81 CtIsLarge, SaturationBaseli  |
| mexA          | 5A |       |       | NoAmplification                   |
| mexD          | 5A | 31.94 | 80.02 | 1.9 CtIsLarge, SaturationBaseli   |
| mexE          | 5A |       |       | NoAmplification                   |
| mexF          | 5A | 27.86 | 84.01 | 2.53 SaturationBaselineRatiolsL   |
| mphA-01       | 5A | 29.24 | 86.78 | 1.77 LowEfficiency, SaturationB:  |
| mphA-02       | 5A | 28.34 | 86.5  | 1.83 SaturationBaselineRatiolsL   |
| mphB          | 5A |       |       | NoAmplification                   |
| mphC          | 5A |       |       | NoAmplification                   |
| msrA-01       | 5A |       |       | NoAmplification                   |
| msrC-01       | 5A |       |       | NoAmplification                   |
| mtrC-01       | 5A |       |       | NoAmplification                   |
| mtrC-02       | 5A | 31.7  | 84.14 | 1.77 LowEfficiency, CtIsLarge, S: |
| mtrD-02       | 5A | 28.19 | 81.34 | 1.84 SaturationBaselineRatiolsL   |
| mtrD-03       | 5A |       |       | NoAmplification                   |
| NDM1          | 5A |       |       | NoAmplification                   |
| nimE          | 5A |       |       | NoAmplification                   |
| nisB          | 5A |       |       | NoAmplification                   |
| oleC          | 5A |       |       | CurveFitFailed                    |
| oprD          | 5A | 28.39 | 86.66 | 2.01 SaturationBaselineRatiolsL   |
| oprJ          | 5A | 33.4  | 90.78 | 1.92 CtIsLarge, SaturationBaseli  |
| pbp           | 5A |       |       | NoAmplification                   |
| pbp2x         | 5A |       |       | NoAmplification                   |
| Pbp5          | 5A |       |       | NoAmplification                   |
| penA          | 5A |       |       | NoAmplification                   |
| pikR1         | 5A |       |       | CurveFitFailed                    |
| pikR2         | 5A |       |       | NoAmplification                   |
| pmrA          | 5A | 25.48 | 78.72 | 1.86 SaturationBaselineRatiolsL   |
| pncA          | 5A | 33.79 | 89.26 | 2.09 CtIsLarge, SaturationBaseli  |
| putative mult | 5A |       |       | NoAmplification                   |
| qac           | 5A |       |       | NoAmplification                   |
| qacA          | 5A | 34.08 | 77.62 | 1.81 CtIsLarge, SaturationBaseli  |
| qacA/qacB     | 5A |       |       | NoAmplification                   |
| qacEdelta1-0  | 5A |       |       | NoAmplification                   |
| qacEdelta1-0  | 5A | 31.17 | 81.07 | 1.89 CtIsLarge, SaturationBaseli  |
| qacH-01       | 5A | 30.81 | 86.14 | 2.03 CtIsLarge, SaturationBaseli  |
| qacH-02       | 5A |       |       | NoAmplification                   |
| qnrA          | 5A |       |       | NoAmplification                   |

|              |    |       |       |                                   |
|--------------|----|-------|-------|-----------------------------------|
| rarD-02      | 5A |       |       | NoAmplification                   |
| sat4         | 5A |       |       | NoAmplification                   |
| sdeB         | 5A |       |       | NoAmplification                   |
| spcN-01      | 5A |       |       | NoAmplification                   |
| speA         | 5A |       |       | NoAmplification                   |
| str          | 5A |       |       | NoAmplification                   |
| strA         | 5A |       |       | NoAmplification                   |
| strB         | 5A |       |       | NoAmplification                   |
| sul1         | 5A | 31.19 | 89.55 | 1.83 CtIsLarge, SaturationBaseli  |
| sul2         | 5A |       |       | NoAmplification                   |
| sulA/foIP-01 | 5A | 23.6  | 81.07 | 2 SaturationBaselineRatiolsL      |
| sulA/foIP-03 | 5A | 24.28 | 82.28 | 1.75 LowEfficiency, SaturationB:  |
| tet(32)      | 5A | 26.26 | 80.83 | 1.76 LowEfficiency, SaturationB:  |
| tet(34)      | 5A |       |       | NoAmplification                   |
| tet(35)      | 5A | 28.02 | 76.89 | 1.99 SaturationBaselineRatiolsL   |
| tet(36)-A    | 5A |       |       | NoAmplification                   |
| tet(36)-B    | 5A |       |       | NoAmplification                   |
| tet(37)      | 5A | 27.48 | 86.11 | 1.96 SaturationBaselineRatiolsL   |
| tetA-01      | 5A | 23.88 | 83.17 | 1.93 SaturationBaselineRatiolsL   |
| tetA-02      | 5A |       |       | CtIsLarge, SaturationBaseli       |
| tetB-01      | 5A | 31.31 | 87.87 | 1.88 CtIsLarge, SaturationBaseli  |
| tetB-02      | 5A |       |       | NoAmplification                   |
| tetC-01      | 5A |       |       | NoAmplification                   |
| tetC-02      | 5A |       |       | NoAmplification                   |
| tetD-01      | 5A |       |       | NoAmplification                   |
| tetD-02      | 5A |       |       | NoAmplification                   |
| tetE         | 5A |       |       | NoAmplification                   |
| tetG-01      | 5A |       |       | NoAmplification                   |
| tetG-02      | 5A |       |       | NoAmplification                   |
| tetH         | 5A |       |       | NoAmplification                   |
| tetJ         | 5A |       |       | NoAmplification                   |
| tetK         | 5A |       |       | NoAmplification                   |
| tetL-01      | 5A |       |       | NoAmplification                   |
| tetL-02      | 5A |       |       | NoAmplification                   |
| tetM-01      | 5A |       |       | NoAmplification                   |
| tetM-02      | 5A | 23.89 | 76.96 | 2.11 SaturationBaselineRatiolsL   |
| tetO-01      | 5A | 30.15 | 76.1  | 1.89 CtIsLarge, SaturationBaseli  |
| tetPA        | 5A |       |       | NoAmplification                   |
| tetPB-01     | 5A |       |       | NoAmplification                   |
| tetPB-02     | 5A | 27.62 | 84.42 | 2.24 SaturationBaselineRatiolsL   |
| tetPB-03     | 5A |       |       | NoAmplification                   |
| tetPB-05     | 5A |       |       | NoAmplification                   |
| tetQ         | 5A | 26.26 | 75.45 | 1.96 SaturationBaselineRatiolsL   |
| tetR-02      | 5A | 29.77 | 89.62 | 1.76 LowEfficiency, CtIsLarge, S: |
| tetR-03      | 5A |       |       | NoAmplification                   |
| tetS         | 5A |       |       | NoAmplification                   |

|             |    |       |       |                                   |
|-------------|----|-------|-------|-----------------------------------|
| tetT        | 5A |       |       | NoAmplification                   |
| tetU-01     | 5A |       |       | NoAmplification                   |
| tetV        | 5A |       |       | NoAmplification                   |
| tetW-01     | 5A | 27.66 | 81.41 | 2.06 SaturationBaselineRatiolsL   |
| tetX        | 5A |       |       | BadR2, LowEfficiency, CtIsS       |
| tnpA-01     | 5A |       |       | NoAmplification                   |
| tnpA-02     | 5A |       |       | NoAmplification                   |
| tnpA-03     | 5A |       |       | NoAmplification                   |
| tnpA-04     | 5A |       |       | NoAmplification                   |
| tnpA-05     | 5A |       |       | NoAmplification                   |
| tnpA-07     | 5A |       |       | NoAmplification                   |
| tolC-01     | 5A |       |       | NoAmplification                   |
| tolC-02     | 5A | 31.66 | 87.44 | 1.79 LowEfficiency, CtIsLarge, S: |
| tolC-03     | 5A | 31.24 | 87.42 | 1.95 CtIsLarge, SaturationBaseli  |
| Tp614       | 5A | 34.87 | 83.26 | 1.89 CtIsLarge, SaturationBaseli  |
| ttgA        | 5A |       |       | NoAmplification                   |
| ttgB        | 5A |       |       | NoAmplification                   |
| vanA        | 5A |       |       | NoAmplification                   |
| vanB-01     | 5A | 31.58 | 79.66 | 1.79 LowEfficiency, CtIsLarge, S: |
| vanC-01     | 5A |       |       | NoAmplification                   |
| vanC-02     | 5A |       |       | NoAmplification                   |
| vanC-03     | 5A | 25.39 | 86.01 | 1.93 SaturationBaselineRatiolsL   |
| vanC1       | 5A |       |       | NoAmplification                   |
| vanC2/vanC3 | 5A | 30.5  | 84.72 | 1.73 LowEfficiency, CtIsLarge, S: |
| vanG        | 5A |       |       | NoAmplification                   |
| vanHB       | 5A |       |       | NoAmplification                   |
| vanHD       | 5A |       |       | NoAmplification                   |
| vanRA-01    | 5A |       |       | NoAmplification                   |
| vanRA-02    | 5A |       |       | NoAmplification                   |
| vanRB       | 5A | 32.14 | 86.58 | 1.53 LowEfficiency, CtIsLarge, S: |
| vanRC       | 5A |       |       | NoAmplification                   |
| vanRC4      | 5A |       |       | NoAmplification                   |
| vanRD       | 5A |       |       | NoAmplification                   |
| vanSA       | 5A |       |       | NoAmplification                   |
| vanSB       | 5A | 28.77 | 73.97 | 1.93 SaturationBaselineRatiolsL   |
| vanSC-01    | 5A | 33.35 | 83.85 | 1.92 CtIsLarge, SaturationBaseli  |
| vanSC-02    | 5A |       |       | NoAmplification                   |
| vanTC-01    | 5A |       |       | NoAmplification                   |
| vanTC-02    | 5A |       |       | NoAmplification                   |
| vanTE       | 5A | 32.79 | 88.1  | 1.91 CtIsLarge, SaturationBaseli  |
| vanTG       | 5A |       |       | NoAmplification                   |
| vanWB       | 5A |       |       | NoAmplification                   |
| vanWG       | 5A |       |       | NoAmplification                   |
| vanXA       | 5A |       |       | NoAmplification                   |
| vanXB       | 5A |       |       | NoAmplification                   |
| vanXD       | 5A | 31.04 | 74.62 | 2.02 CtIsLarge, SaturationBaseli  |

|              |    |       |       |      |                              |
|--------------|----|-------|-------|------|------------------------------|
| vanYB        | 5A |       |       |      | CtIsLarge, SaturationBaseli  |
| vanYD-01     | 5A | 30.8  | 86.18 | 1.78 | LowEfficiency, CtIsLarge, S: |
| vanYD-02     | 5A |       |       |      | CtIsLarge, SaturationBaseli  |
| vatB-01      | 5A |       |       |      | NoAmplification              |
| vatB-02      | 5A |       |       |      | NoAmplification              |
| vatC-01      | 5A | 31.43 | 81.22 | 1.76 | LowEfficiency, CtIsLarge, S: |
| vatC-02      | 5A | 33.4  | 86.72 | 1.88 | CtIsLarge, SaturationBaseli  |
| vatE-01      | 5A | 30.33 | 76.29 | 1.9  | CtIsLarge, SaturationBaseli  |
| vatE-02      | 5A |       |       |      | NoAmplification              |
| vgaA-01      | 5A |       |       |      | NoAmplification              |
| vgaA-02      | 5A |       |       |      | NoAmplification              |
| vgb-01       | 5A |       |       |      | NoAmplification              |
| vgbB-01      | 5A | 32.78 | 86.33 | 1.66 | LowEfficiency, CtIsLarge, S: |
| vgbB-02      | 5A |       |       |      | NoAmplification              |
| yceE/mdtG-0  | 5A |       |       |      | NoAmplification              |
| yceE/mdtG-0  | 5A |       |       |      | NoAmplification              |
| yceL/mdtH-0  | 5A | 31.88 | 83.48 | 1.56 | LowEfficiency, CtIsLarge, S: |
| yceL/mdtH-0  | 5A |       |       |      | NoAmplification              |
| yceL/mdtH-0  | 5A | 34.24 | 81.29 | 1.84 | CtIsLarge, SaturationBaseli  |
| yidY/mdtL-01 | 5A | 31.14 | 85.15 | 1.91 | CtIsLarge, SaturationBaseli  |
| yidY/mdtL-02 | 5A | 33.15 | 76.56 | 1.85 | CtIsLarge, SaturationBaseli  |































| Assay           | Sample | Ct    | Tm    | Efficiency | flag                                         |
|-----------------|--------|-------|-------|------------|----------------------------------------------|
| 16S rRNA        | 5B     |       | 19.37 | 82.25      | 1.94                                         |
| aac             | 5B     |       | 31.37 | 83.27      | 1.95 CtlIsLarge, MultipleMeltPeaks           |
| aac(6')-Ib(akz) | 5B     |       |       |            | NoAmplification                              |
| aac(6')-Ib(akz) | 5B     | 29    | 83.53 | 1.94       | MultipleMeltPeaks                            |
| aac(6')-Ib(akz) | 5B     | 33.97 | 86.37 | 1.91       | CtlIsLarge, MultipleMeltPeaks                |
| aac(6')-II      | 5B     |       |       |            | LowEfficiency, CtlIsLarge, CurveFitFailed    |
| aac(6')I1       | 5B     |       |       |            | LowEfficiency, CtlIsLarge, CurveFitFailed    |
| aacA/aphD       | 5B     |       |       |            | CurveFitFailed                               |
| aacC            | 5B     | 30.99 | 85.22 | 1.91       | CtlIsLarge                                   |
| aacC1           | 5B     |       |       |            | NoAmplification                              |
| aacC2           | 5B     |       |       |            | NoAmplification                              |
| aacC4           | 5B     | 34.13 | 79.79 | 1.79       | LowEfficiency, CtlIsLarge, MultipleMeltPeaks |
| aadA-01         | 5B     |       |       |            | NoAmplification                              |
| aadA-02         | 5B     | 33.03 | 86.73 | 1.98       | CtlIsLarge, MultipleMeltPeaks                |
| aadA-1-01       | 5B     |       |       |            | CtlIsLarge, CurveFitFailed                   |
| aadA-1-02       | 5B     |       |       |            | NoAmplification                              |
| aadA1           | 5B     |       |       |            | LowEfficiency, CtlIsLarge, CurveFitFailed    |
| aadA2-01        | 5B     |       |       |            | LowEfficiency, CtlIsLarge, CurveFitFailed    |
| aadA2-02        | 5B     | 34.18 | 74.9  | 1.99       | CtlIsLarge, SaturationBaseline               |
| aadA2-03        | 5B     |       |       |            | NoAmplification                              |
| aadA5-01        | 5B     |       |       |            | LowEfficiency, CtlIsLarge, CurveFitFailed    |
| aadA5-02        | 5B     | 34.43 | 83.24 | 1.93       | CtlIsLarge                                   |
| aadA9-01        | 5B     |       |       |            | CurveFitFailed                               |
| aadA9-02        | 5B     |       |       |            | CtlIsLarge, CurveFitFailed                   |
| aadD            | 5B     |       |       |            | NoAmplification                              |
| aadE            | 5B     |       |       |            | NoAmplification                              |
| acrA-01         | 5B     | 31.83 | 88.46 | 1.89       | CtlIsLarge                                   |
| acrA-02         | 5B     |       |       |            | LowEfficiency, CtlIsLarge, CurveFitFailed    |
| acrA-03         | 5B     |       |       |            | CtlIsLarge, CurveFitFailed                   |
| acrA-04         | 5B     | 30.67 | 80.37 | 1.97       | CtlIsLarge                                   |
| acrA-05         | 5B     | 30.69 | 89.26 | 1.96       | CtlIsLarge                                   |
| acrB-01         | 5B     |       |       |            | NoAmplification                              |
| acrF            | 5B     | 28.49 | 84.81 | 1.9        |                                              |
| acrR-01         | 5B     | 34.39 | 89.82 | 1.89       | CtlIsLarge, MultipleMeltPeaks                |
| acrR-02         | 5B     | 32.55 | 86.42 | 1.95       | CtlIsLarge                                   |
| Actin           | 5B     | 22.27 | 86.92 | 1.94       |                                              |
| adeA            | 5B     |       |       |            | CtlIsLarge, CurveFitFailed                   |
| ampC-01         | 5B     |       |       |            | LowEfficiency, CtlIsLarge, CurveFitFailed    |
| ampC-02         | 5B     |       |       |            | LowEfficiency, CtlIsLarge, CurveFitFailed    |
| ampC-04         | 5B     | 32.39 | 78.48 | 1.85       | CtlIsLarge                                   |
| ampC-05         | 5B     |       |       |            | NoAmplification                              |
| ampC-06         | 5B     |       |       |            | LowEfficiency, CtlIsLarge, CurveFitFailed    |
| ampC-07         | 5B     | 34.05 | 81.21 | 1.96       | CtlIsLarge                                   |
| ampC-09         | 5B     |       |       |            | NoAmplification                              |
| ampC/blaDH      | 5B     | 30.24 | 83.16 | 1.97       | CtlIsLarge, MultipleMeltPeaks                |

|                          |    |       |       |                                  |
|--------------------------|----|-------|-------|----------------------------------|
| aph                      | 5B |       |       | NoAmplification                  |
| aph(2')-Id-01            | 5B |       |       | NoAmplification                  |
| aph(2')-Id-02            | 5B |       |       | NoAmplification                  |
| aph6ia                   | 5B |       |       | CtIsLarge, CurveFitFailed        |
| aphA1(aka k <sub>a</sub> | 5B |       |       | NoAmplification                  |
| bacA-01                  | 5B |       |       | LowEfficiency, CtIsLarge, C      |
| bacA-02                  | 5B |       |       | LowEfficiency, CtIsLarge, C      |
| BETA-globin              | 5B | 23.57 | 83.9  | 1.99                             |
| bla-ACC-1                | 5B | 34.69 | 88.37 | 1.85 CtIsLarge                   |
| bla-L1                   | 5B | 30.94 | 84.44 | 1.99 CtIsLarge                   |
| bla1                     | 5B |       |       | NoAmplification                  |
| blaCMY                   | 5B |       |       | NoAmplification                  |
| blaCMY2-01               | 5B | 33.27 | 85.14 | 2.01 CtIsLarge                   |
| blaCMY2-02               | 5B | 29.41 | 85.04 | 2 MultipleMeltPeaks              |
| blaCTX-M-01              | 5B | 34.23 | 79.68 | 2.08 CtIsLarge                   |
| blaCTX-M-02              | 5B | 32.5  | 85.46 | 1.92 CtIsLarge                   |
| blaCTX-M-03              | 5B |       |       | NoAmplification                  |
| blaCTX-M-04              | 5B |       |       | LowEfficiency, CtIsLarge, C      |
| blaCTX-M-05              | 5B | 31.65 | 76.53 | 1.72 LowEfficiency, CtIsLarge, S |
| blaCTX-M-06              | 5B |       |       | NoAmplification                  |
| blaGES                   | 5B |       |       | NoAmplification                  |
| blaIMP-01                | 5B |       |       | NoAmplification                  |
| blaIMP-02                | 5B |       |       | CtIsLarge, CurveFitFailed        |
| blaMOX/blaC              | 5B | 33.74 | 81.07 | 2.05 CtIsLarge                   |
| blaOCH                   | 5B |       |       | NoAmplification                  |
| blaOKP                   | 5B |       |       | NoAmplification                  |
| blaOXA1/blaC             | 5B |       |       | NoAmplification                  |
| blaOXA10-01              | 5B |       |       | CtIsLarge, CurveFitFailed        |
| blaOXA10-02              | 5B |       |       | CurveFitFailed                   |
| blaOXY                   | 5B |       |       | LowEfficiency, CtIsLarge, C      |
| blaPAO                   | 5B |       |       | NoAmplification                  |
| blaPER                   | 5B |       |       | CurveFitFailed                   |
| blaPSE                   | 5B |       |       | NoAmplification                  |
| blaROB                   | 5B |       |       | NoAmplification                  |
| blaSFO                   | 5B | 31.12 | 80.1  | 1.93 CtIsLarge                   |
| blaSHV-01                | 5B |       |       | LowEfficiency, CtIsLarge, C      |
| blaSHV-02                | 5B |       |       | CurveFitFailed                   |
| blaTEM                   | 5B | 27.55 | 79.45 | 1.98                             |
| blaTLA                   | 5B |       |       | NoAmplification                  |
| blaVEB                   | 5B |       |       | CtIsLarge, CurveFitFailed        |
| blaVIM                   | 5B |       |       | CtIsLarge, CurveFitFailed        |
| blaZ                     | 5B |       |       | NoAmplification                  |
| carB                     | 5B |       |       | CtIsLarge, CurveFitFailed        |
| catA1                    | 5B |       |       | NoAmplification                  |
| catB3                    | 5B |       |       | LowEfficiency, CtIsLarge, C      |
| catB8                    | 5B | 28.18 | 82.46 | 1.96                             |

|            |    |       |       |      |                             |
|------------|----|-------|-------|------|-----------------------------|
| ceoA       | 5B | 27.06 | 82.1  | 1.96 | MultipleMeltPeaks           |
| cepA       | 5B |       |       |      | NoAmplification             |
| cfiA       | 5B | 29.85 | 86.1  | 1.91 | CtIsLarge, SaturationBaseli |
| cfr        | 5B |       |       |      | NoAmplification             |
| cfxA       | 5B | 30.31 | 85.21 | 1.96 | CtIsLarge                   |
| cmeA       | 5B |       |       |      | LowEfficiency, CtIsLarge, C |
| cmlA1-01   | 5B |       |       |      | LowEfficiency, CtIsLarge, C |
| cmlA1-02   | 5B |       |       |      | LowEfficiency, CtIsLarge, C |
| cmr        | 5B |       |       |      | CurveFitFailed              |
| cmx(A)     | 5B | 28.53 | 86.65 | 2.02 | MultipleMeltPeaks           |
| cphA-01    | 5B | 30.14 | 85.63 | 1.98 | CtIsLarge                   |
| cphA-02    | 5B | 33.48 | 82.08 | 1.96 | CtIsLarge                   |
| dfrA1      | 5B |       |       |      | CurveFitFailed              |
| dfrA12     | 5B |       |       |      | LowEfficiency, CtIsLarge, C |
| emrD       | 5B |       |       |      | LowEfficiency, CtIsLarge, C |
| ereA       | 5B |       |       |      | CtIsLarge, CurveFitFailed   |
| ereB       | 5B | 33.68 | 82.32 | 2.01 | CtIsLarge                   |
| erm(34)    | 5B |       |       |      | NoAmplification             |
| erm(35)    | 5B |       |       |      | NoAmplification             |
| erm(36)    | 5B | 34.07 | 81.82 | 1.99 | CtIsLarge, MultipleMeltPea  |
| ermA       | 5B |       |       |      | NoAmplification             |
| ermA/ermTR | 5B |       |       |      | NoAmplification             |
| ermB       | 5B | 26.93 | 75.06 | 2.11 |                             |
| ermC       | 5B |       |       |      | NoAmplification             |
| ermF       | 5B |       |       |      | NoAmplification             |
| ermJ/ermD  | 5B |       |       |      | NoAmplification             |
| ermK-01    | 5B | 33.58 | 86.32 | 1.87 | CtIsLarge                   |
| ermK-02    | 5B | 34.12 | 76.49 | 1.86 | CtIsLarge, MultipleMeltPea  |
| ermT-01    | 5B |       |       |      | NoAmplification             |
| ermT-02    | 5B | 34.08 | 84.49 | 1.93 | CtIsLarge, MultipleMeltPea  |
| ermX       | 5B |       |       |      | LowEfficiency, CtIsLarge, C |
| ermY       | 5B |       |       |      | NoAmplification             |
| fabK       | 5B | 27.86 | 79.08 | 2.06 |                             |
| floR       | 5B |       |       |      | NoAmplification             |
| folA       | 5B |       |       |      | NoAmplification             |
| fosB       | 5B |       |       |      | LowEfficiency, CtIsSmall, S |
| fosX       | 5B |       |       |      | NoAmplification             |
| fox5       | 5B | 27.91 | 86.89 | 1.99 |                             |
| imiR       | 5B |       |       |      | NoAmplification             |
| ImrA-01    | 5B | 33.73 | 82.7  | 1.97 | CtIsLarge                   |
| intl       | 5B | 28.68 | 85.33 | 1.92 |                             |
| intl1      | 5B | 20.57 | 87.16 | 2    |                             |
| IS613      | 5B |       |       |      | CtIsLarge, CurveFitFailed   |
| lnuA-01    | 5B |       |       |      | NoAmplification             |
| lnuB-01    | 5B |       |       |      | NoAmplification             |
| lnuB-02    | 5B |       |       |      | NoAmplification             |

|               |    |       |       |      |                             |
|---------------|----|-------|-------|------|-----------------------------|
| lnuC          | 5B |       |       |      | LowEfficiency, CtIsLarge, C |
| marR-01       | 5B | 30.09 | 85.24 | 1.92 | CtIsLarge                   |
| matA/mel      | 5B | 24.36 | 77.66 | 2.03 |                             |
| mdet11        | 5B |       |       |      | NoAmplification             |
| mdtA          | 5B |       |       |      | LowEfficiency, CtIsLarge, C |
| mdtE/yhiU     | 5B |       |       |      | NoAmplification             |
| mecA          | 5B |       |       |      | NoAmplification             |
| mefA          | 5B | 23.58 | 80.48 | 1.97 |                             |
| mepA          | 5B | 33.23 | 82.51 | 1.95 | CtIsLarge, MultipleMeltPea  |
| mexA          | 5B |       |       |      | NoAmplification             |
| mexD          | 5B |       |       |      | CtIsLarge, CurveFitFailed   |
| mexE          | 5B | 32.74 | 88.36 | 1.92 | CtIsLarge                   |
| mexF          | 5B | 27.94 | 83.28 | 1.9  | MultipleMeltPeaks           |
| mphA-01       | 5B | 30.95 | 86.89 | 2    | CtIsLarge, MultipleMeltPea  |
| mphA-02       | 5B | 30.43 | 89.21 | 2.08 | CtIsLarge, MultipleMeltPea  |
| mphB          | 5B |       |       |      | CurveFitFailed              |
| mphC          | 5B |       |       |      | CurveFitFailed              |
| msrA-01       | 5B |       |       |      | NoAmplification             |
| msrC-01       | 5B |       |       |      | NoAmplification             |
| mtrC-01       | 5B |       |       |      | NoAmplification             |
| mtrC-02       | 5B | 29.5  | 75.45 | 1.96 | CtIsLarge                   |
| mtrD-02       | 5B | 26.75 | 83.69 | 2.03 |                             |
| mtrD-03       | 5B | 34.77 | 81.99 | 1.87 | CtIsLarge                   |
| NDM1          | 5B |       |       |      | NoAmplification             |
| nimE          | 5B |       |       |      | NoAmplification             |
| nisB          | 5B |       |       |      | NoAmplification             |
| oleC          | 5B |       |       |      | LowEfficiency, CtIsLarge, C |
| oprD          | 5B | 28.47 | 86.58 | 2.03 | MultipleMeltPeaks           |
| oprJ          | 5B |       |       |      | CurveFitFailed              |
| pbp           | 5B |       |       |      | NoAmplification             |
| pbp2x         | 5B |       |       |      | NoAmplification             |
| Pbp5          | 5B |       |       |      | NoAmplification             |
| penA          | 5B |       |       |      | LowEfficiency, CtIsLarge, C |
| pikR1         | 5B |       |       |      | NoAmplification             |
| pikR2         | 5B | 30.32 | 85.11 | 2.02 | CtIsLarge                   |
| pmrA          | 5B | 27.47 | 79.43 | 2.09 |                             |
| pncA          | 5B |       |       |      | CtIsLarge, CurveFitFailed   |
| putative mult | 5B |       |       |      | CtIsLarge, CurveFitFailed   |
| qac           | 5B |       |       |      | LowEfficiency, CtIsLarge, C |
| qacA          | 5B | 31.78 | 70.74 | 1.84 | CtIsLarge                   |
| qacA/qacB     | 5B |       |       |      | NoAmplification             |
| qacEdelta1-0  | 5B |       |       |      | NoAmplification             |
| qacEdelta1-0  | 5B | 30.48 | 76.41 | 2    | CtIsLarge                   |
| qacH-01       | 5B | 31.47 | 85.24 | 1.93 | CtIsLarge                   |
| qacH-02       | 5B | 29.05 | 79.06 | 2.03 |                             |
| qnrA          | 5B |       |       |      | CtIsLarge, CurveFitFailed   |



|              |    |       |       |      |                             |
|--------------|----|-------|-------|------|-----------------------------|
| rarD-02      | 5B |       |       |      | LowEfficiency, CtIsLarge, C |
| sat4         | 5B |       |       |      | NoAmplification             |
| sdeB         | 5B |       |       |      | LowEfficiency, CtIsLarge, C |
| spcN-01      | 5B |       |       |      | NoAmplification             |
| speA         | 5B |       |       |      | NoAmplification             |
| str          | 5B |       |       |      | NoAmplification             |
| strA         | 5B |       |       |      | NoAmplification             |
| strB         | 5B |       |       |      | LowEfficiency, CtIsLarge, C |
| sul1         | 5B | 33.09 | 82.72 | 1.81 | CtIsLarge, MultipleMeltPea  |
| sul2         | 5B |       |       |      | NoAmplification             |
| sulA/foIP-01 | 5B | 24.47 | 82.14 | 1.93 |                             |
| sulA/foIP-03 | 5B | 23.21 | 83.53 | 1.99 |                             |
| tet(32)      | 5B | 30.59 | 86.72 | 2    | CtIsLarge                   |
| tet(34)      | 5B | 30.05 | 79.12 | 1.83 | CtIsLarge                   |
| tet(35)      | 5B | 30.06 | 77.21 | 2.03 | CtIsLarge                   |
| tet(36)-A    | 5B | 32.76 | 81.91 | 2    | CtIsLarge                   |
| tet(36)-B    | 5B | 33.62 | 77.43 | 1.94 | CtIsLarge                   |
| tet(37)      | 5B | 28.56 | 83.2  | 1.97 | MultipleMeltPeaks           |
| tetA-01      | 5B | 26.27 | 83.23 | 2.01 | MultipleMeltPeaks           |
| tetA-02      | 5B |       |       |      | LowEfficiency, CtIsLarge, C |
| tetB-01      | 5B | 32.18 | 86.16 | 1.97 | CtIsLarge                   |
| tetB-02      | 5B |       |       |      | LowEfficiency, CtIsLarge, C |
| tetC-01      | 5B |       |       |      | NoAmplification             |
| tetC-02      | 5B |       |       |      | NoAmplification             |
| tetD-01      | 5B |       |       |      | NoAmplification             |
| tetD-02      | 5B |       |       |      | CurveFitFailed              |
| tetE         | 5B |       |       |      | NoAmplification             |
| tetG-01      | 5B |       |       |      | NoAmplification             |
| tetG-02      | 5B |       |       |      | NoAmplification             |
| tetH         | 5B |       |       |      | NoAmplification             |
| tetJ         | 5B |       |       |      | NoAmplification             |
| tetK         | 5B |       |       |      | NoAmplification             |
| tetL-01      | 5B |       |       |      | NoAmplification             |
| tetL-02      | 5B |       |       |      | NoAmplification             |
| tetM-01      | 5B |       |       |      | NoAmplification             |
| tetM-02      | 5B | 28.29 | 77.36 | 2.05 |                             |
| tetO-01      | 5B | 27.35 | 76.71 | 2.05 |                             |
| tetPA        | 5B |       |       |      | NoAmplification             |
| tetPB-01     | 5B |       |       |      | NoAmplification             |
| tetPB-02     | 5B | 29.23 | 84.62 | 1.98 |                             |
| tetPB-03     | 5B |       |       |      | NoAmplification             |
| tetPB-05     | 5B |       |       |      | NoAmplification             |
| tetQ         | 5B |       |       |      | NoAmplification             |
| tetR-02      | 5B | 33.27 | 84.82 | 1.88 | CtIsLarge, MultipleMeltPea  |
| tetR-03      | 5B |       |       |      | NoAmplification             |
| tetS         | 5B |       |       |      | CtIsLarge, CurveFitFailed   |

|             |    |       |       |      |                              |
|-------------|----|-------|-------|------|------------------------------|
| tetT        | 5B |       |       |      | CtIsLarge, CurveFitFailed    |
| tetU-01     | 5B |       |       |      | CtIsLarge, CurveFitFailed    |
| tetV        | 5B |       |       |      | NoAmplification              |
| tetW-01     | 5B |       |       |      | NoAmplification              |
| tetX        | 5B |       |       |      | NoAmplification              |
| tnpA-01     | 5B |       |       |      | CtIsLarge, CurveFitFailed    |
| tnpA-02     | 5B |       |       |      | NoAmplification              |
| tnpA-03     | 5B |       |       |      | CurveFitFailed               |
| tnpA-04     | 5B | 32.8  | 74.76 | 1.67 | LowEfficiency, CtIsLarge, S: |
| tnpA-05     | 5B |       |       |      | CtIsLarge, CurveFitFailed    |
| tnpA-07     | 5B |       |       |      | NoAmplification              |
| tolC-01     | 5B |       |       |      | CurveFitFailed               |
| tolC-02     | 5B | 30.52 | 87.7  | 1.98 | CtIsLarge                    |
| tolC-03     | 5B | 30.48 | 85.65 | 1.97 | CtIsLarge                    |
| Tp614       | 5B | 32.19 | 83.38 | 1.93 | CtIsLarge                    |
| ttgA        | 5B |       |       |      | CtIsLarge, CurveFitFailed    |
| ttgB        | 5B | 31.53 | 83.12 | 2.01 | CtIsLarge                    |
| vanA        | 5B |       |       |      | NoAmplification              |
| vanB-01     | 5B | 29.24 | 84.47 | 2.05 |                              |
| vanC-01     | 5B |       |       |      | NoAmplification              |
| vanC-02     | 5B |       |       |      | NoAmplification              |
| vanC-03     | 5B | 27.15 | 86.01 | 1.92 |                              |
| vanC1       | 5B |       |       |      | NoAmplification              |
| vanC2/vanC3 | 5B | 33.78 | 89.48 | 1.96 | CtIsLarge, MultipleMeltPea   |
| vanG        | 5B |       |       |      | NoAmplification              |
| vanHB       | 5B |       |       |      | CurveFitFailed               |
| vanHD       | 5B | 34.39 | 85.21 | 1.92 | CtIsLarge                    |
| vanRA-01    | 5B |       |       |      | NoAmplification              |
| vanRA-02    | 5B |       |       |      | CtIsLarge, CurveFitFailed    |
| vanRB       | 5B | 28.82 | 87.29 | 2.07 |                              |
| vanRC       | 5B |       |       |      | NoAmplification              |
| vanRC4      | 5B |       |       |      | NoAmplification              |
| vanRD       | 5B |       |       |      | NoAmplification              |
| vanSA       | 5B |       |       |      | NoAmplification              |
| vanSB       | 5B | 27.79 | 74.76 | 2.11 |                              |
| vanSC-01    | 5B |       |       |      | CurveFitFailed               |
| vanSC-02    | 5B |       |       |      | NoAmplification              |
| vanTC-01    | 5B |       |       |      | NoAmplification              |
| vanTC-02    | 5B |       |       |      | CurveFitFailed               |
| vanTE       | 5B | 34.33 | 85.12 | 1.86 | CtIsLarge, MultipleMeltPea   |
| vanTG       | 5B |       |       |      | NoAmplification              |
| vanWB       | 5B |       |       |      | NoAmplification              |
| vanWG       | 5B | 31.74 | 74.98 | 1.99 | CtIsLarge                    |
| vanXA       | 5B |       |       |      | LowEfficiency, CurveFitFail  |
| vanXB       | 5B |       |       |      | NoAmplification              |
| vanXD       | 5B | 28.55 | 75.12 | 2.06 |                              |

|              |    |       |       |      |                             |
|--------------|----|-------|-------|------|-----------------------------|
| vanYB        | 5B |       |       |      | CtIsLarge, CurveFitFailed   |
| vanYD-01     | 5B | 30.72 | 82.42 | 1.88 | CtIsLarge                   |
| vanYD-02     | 5B |       |       |      | NoAmplification             |
| vatB-01      | 5B |       |       |      | NoAmplification             |
| vatB-02      | 5B |       |       |      | LowEfficiency, CtIsLarge, C |
| vatC-01      | 5B | 33.57 | 81.23 | 1.9  | CtIsLarge                   |
| vatC-02      | 5B |       |       |      | CtIsLarge, CurveFitFailed   |
| vatE-01      | 5B | 27.44 | 77.41 | 2.13 |                             |
| vatE-02      | 5B |       |       |      | CtIsLarge, CurveFitFailed   |
| vgaA-01      | 5B |       |       |      | NoAmplification             |
| vgaA-02      | 5B |       |       |      | CurveFitFailed              |
| vgb-01       | 5B |       |       |      | CtIsLarge, CurveFitFailed   |
| vgbB-01      | 5B |       |       |      | CurveFitFailed              |
| vgbB-02      | 5B |       |       |      | CtIsLarge, CurveFitFailed   |
| yceE/mdtG-0  | 5B | 34.88 | 85.21 | 1.99 | CtIsLarge, MultipleMeltPea  |
| yceE/mdtG-0  | 5B |       |       |      | NoAmplification             |
| yceL/mdtH-0  | 5B | 31.48 | 84.77 | 1.98 | CtIsLarge                   |
| yceL/mdtH-0  | 5B |       |       |      | NoAmplification             |
| yceL/mdtH-0  | 5B | 34.61 | 81.45 | 1.89 | CtIsLarge                   |
| yidY/mdtL-01 | 5B | 30.03 | 82.66 | 1.96 | CtIsLarge                   |
| yidY/mdtL-02 | 5B |       |       |      | NoAmplification             |































| Assay          | Sample | Ct | Tm    | Efficiency | flag                         |
|----------------|--------|----|-------|------------|------------------------------|
| 16S rRNA       | 5C     |    | 20.23 | 82.14      | 1.97                         |
| aac            | 5C     |    | 31.31 | 86.93      | 1.92 MultipleMeltPeaks       |
| aac(6')-Ib(akz | 5C     |    | 41.09 | 81.8       | 1.83 MultipleMeltPeaks       |
| aac(6')-Ib(akz | 5C     |    | 34.02 | 80.61      | 1.94 MultipleMeltPeaks       |
| aac(6')-Ib(akz | 5C     |    | 33.49 | 80.69      | 1.99 MultipleMeltPeaks       |
| aac(6')-II     | 5C     |    | 37.92 | 78.25      | 1.61 MultipleMeltPeaks       |
| aac(6')I1      | 5C     |    | 37.94 | 62.46      | 1.65 MultipleMeltPeaks       |
| aacA/aphD      | 5C     |    |       |            | LowEfficiency, CtIsSmall, Ci |
| aacC           | 5C     |    | 31.61 | 92.42      | 1.9                          |
| aacC1          | 5C     |    |       |            | CurveFitFailed               |
| aacC2          | 5C     |    |       |            | NoAmplification              |
| aacC4          | 5C     |    |       |            | NoAmplification              |
| aadA-01        | 5C     |    |       |            | LowEfficiency, CtIsSmall, Ci |
| aadA-02        | 5C     |    | 37.21 | 80.71      | 1.91                         |
| aadA-1-01      | 5C     |    | 34.46 | 81.75      | 1.9                          |
| aadA-1-02      | 5C     |    |       |            | CurveFitFailed               |
| aadA1          | 5C     |    | 32.79 | 85.11      | 1.99                         |
| aadA2-01       | 5C     |    | 33.11 | 83.24      | 1.92                         |
| aadA2-02       | 5C     |    | 32.95 | 75.42      | 2.06                         |
| aadA2-03       | 5C     |    | 39.55 | 86.21      | 1.79 MultipleMeltPeaks       |
| aadA5-01       | 5C     |    | 37.06 | 79.21      | 1.77 MultipleMeltPeaks       |
| aadA5-02       | 5C     |    | 30.98 | 78.07      | 1.99 MultipleMeltPeaks       |
| aadA9-01       | 5C     |    | 38.11 | 87.92      | 1.75 MultipleMeltPeaks       |
| aadA9-02       | 5C     |    | 36.17 | 89.91      | 1.88 MultipleMeltPeaks       |
| aadD           | 5C     |    |       |            | NoAmplification              |
| aadE           | 5C     |    |       |            | NoAmplification              |
| acrA-01        | 5C     |    | 29.63 | 89.14      | 1.88                         |
| acrA-02        | 5C     |    | 33.94 | 88.23      | 1.87 MultipleMeltPeaks       |
| acrA-03        | 5C     |    | 39.72 | 80.23      | 1.68 MultipleMeltPeaks       |
| acrA-04        | 5C     |    | 30.16 | 80.73      | 1.97 MultipleMeltPeaks       |
| acrA-05        | 5C     |    | 29.17 | 89.19      | 1.94                         |
| acrB-01        | 5C     |    | 36.42 | 76.2       | 2                            |
| acrF           | 5C     |    | 31.05 | 82.49      | 1.97                         |
| acrR-01        | 5C     |    | 33.1  | 89.61      | 1.93 MultipleMeltPeaks       |
| acrR-02        | 5C     |    | 32.15 | 86.78      | 1.94                         |
| Actin          | 5C     |    | 21.86 | 87.05      | 1.96                         |
| adeA           | 5C     |    | 36.06 | 81.66      | 1.79                         |
| ampC-01        | 5C     |    | 32.4  | 87.47      | 1.98                         |
| ampC-02        | 5C     |    | 31.41 | 89.06      | 1.93                         |
| ampC-04        | 5C     |    | 30.55 | 79.98      | 1.92                         |
| ampC-05        | 5C     |    |       |            | NoAmplification              |
| ampC-06        | 5C     |    | 40.12 | 71.37      | 1.76 MultipleMeltPeaks       |
| ampC-07        | 5C     |    | 36.89 | 82.32      | 1.82 MultipleMeltPeaks       |
| ampC-09        | 5C     |    |       |            | CurveFitFailed               |
| ampC/blaDH     | 5C     |    | 29.47 | 84.66      | 1.97 MultipleMeltPeaks       |

|                          |    |       |       |      |                              |
|--------------------------|----|-------|-------|------|------------------------------|
| aph                      | 5C |       |       |      | LowEfficiency, CtIsSmall, S; |
| aph(2')-Id-01            | 5C |       |       |      | NoAmplification              |
| aph(2')-Id-02            | 5C |       |       |      | LowEfficiency, CtIsSmall, Ci |
| aph6ia                   | 5C | 35.29 | 76.21 | 1.88 | MultipleMeltPeaks            |
| aphA1(aka k <sub>z</sub> | 5C |       |       |      | CurveFitFailed               |
| bacA-01                  | 5C | 37.38 | 78.87 | 1.79 | MultipleMeltPeaks            |
| bacA-02                  | 5C | 34.19 | 85.53 | 1.82 | MultipleMeltPeaks            |
| BETA-globin              | 5C | 23.33 | 84.24 | 1.97 |                              |
| bla-ACC-1                | 5C | 34.43 | 86    | 1.86 | MultipleMeltPeaks            |
| bla-L1                   | 5C | 30.33 | 85.59 | 2.02 |                              |
| bla1                     | 5C |       |       |      | CurveFitFailed               |
| blaCMY                   | 5C | 39.73 | 81.1  | 1.69 | MultipleMeltPeaks            |
| blaCMY2-01               | 5C | 37.01 | 77.18 | 1.85 | MultipleMeltPeaks            |
| blaCMY2-02               | 5C | 28.28 | 85.62 | 1.97 | MultipleMeltPeaks            |
| blaCTX-M-01              | 5C | 32.73 | 92.32 | 2.08 | MultipleMeltPeaks            |
| blaCTX-M-02              | 5C | 29.2  | 79.92 | 1.92 | MultipleMeltPeaks            |
| blaCTX-M-03              | 5C | 37.53 | 80.01 | 1.88 |                              |
| blaCTX-M-04              | 5C | 35.57 | 85.48 | 1.81 | MultipleMeltPeaks            |
| blaCTX-M-05              | 5C | 31.41 | 76.75 | 1.81 |                              |
| blaCTX-M-06              | 5C |       |       |      | NoAmplification              |
| blaGES                   | 5C |       |       |      | NoAmplification              |
| blaIMP-01                | 5C | 39.29 | 74.73 | 1.82 |                              |
| blaIMP-02                | 5C | 38.91 | 82.62 | 1.81 |                              |
| blaMOX/blaC              | 5C | 36.35 | 82.23 | 1.88 |                              |
| blaOCH                   | 5C |       |       |      | NoAmplification              |
| blaOKP                   | 5C |       |       |      | NoAmplification              |
| blaOXA1/blaC             | 5C |       |       |      | LowEfficiency, CtIsSmall, Ci |
| blaOXA10-01              | 5C |       |       |      | LowEfficiency, CtIsSmall, Ci |
| blaOXA10-02              | 5C |       |       |      | CurveFitFailed               |
| blaOXY                   | 5C | 33.81 | 80.32 | 1.87 | MultipleMeltPeaks            |
| blaPAO                   | 5C |       |       |      | NoAmplification              |
| blaPER                   | 5C | 33.57 | 77.62 | 1.92 |                              |
| blaPSE                   | 5C |       |       |      | NoAmplification              |
| blaROB                   | 5C |       |       |      | NoAmplification              |
| blaSFO                   | 5C | 29.7  | 89.2  | 1.92 |                              |
| blaSHV-01                | 5C | 30.67 | 86.26 | 2.04 | MultipleMeltPeaks            |
| blaSHV-02                | 5C | 35.36 | 78.24 | 1.88 |                              |
| blaTEM                   | 5C | 36.41 | 83.98 | 1.92 | MultipleMeltPeaks            |
| blaTLA                   | 5C |       |       |      | NoAmplification              |
| blaVEB                   | 5C |       |       |      | NoAmplification              |
| blaVIM                   | 5C | 36.06 | 85.67 | 1.87 |                              |
| blaZ                     | 5C |       |       |      | LowEfficiency, CtIsSmall, Ci |
| carB                     | 5C | 38.53 | 79.86 | 1.72 | MultipleMeltPeaks            |
| catA1                    | 5C |       |       |      | NoAmplification              |
| catB3                    | 5C |       |       |      | CurveFitFailed               |
| catB8                    | 5C | 28.57 | 82.81 | 1.97 |                              |

|            |    |       |       |      |                              |
|------------|----|-------|-------|------|------------------------------|
| ceoA       | 5C | 28.78 | 82.31 | 1.95 |                              |
| cepA       | 5C |       |       |      | NoAmplification              |
| cfiA       | 5C | 29.06 | 88.57 | 2.06 |                              |
| cfr        | 5C |       |       |      | LowEfficiency, CtIsSmall, S: |
| cfxA       | 5C | 24.44 | 77.96 | 2.07 |                              |
| cmeA       | 5C | 38.35 | 81.88 | 1.81 | MultipleMeltPeaks            |
| cmlA1-01   | 5C | 35.77 | 80.18 | 1.83 | MultipleMeltPeaks            |
| cmlA1-02   | 5C | 37.17 | 79.69 | 1.89 |                              |
| cmr        | 5C |       |       |      | CurveFitFailed               |
| cmx(A)     | 5C | 26.66 | 86.69 | 1.97 |                              |
| cphA-01    | 5C | 30.68 | 85.58 | 2    | MultipleMeltPeaks            |
| cphA-02    | 5C | 30.67 | 82.74 | 1.92 |                              |
| dfrA1      | 5C | 34.05 | 78.49 | 1.93 | MultipleMeltPeaks            |
| dfrA12     | 5C | 34.95 | 77.85 | 1.84 | MultipleMeltPeaks            |
| emrD       | 5C | 35.69 | 88.21 | 1.78 |                              |
| ereA       | 5C | 36.49 | 83.56 | 1.85 |                              |
| ereB       | 5C | 32.22 | 85.65 | 2.05 |                              |
| erm(34)    | 5C |       |       |      | NoAmplification              |
| erm(35)    | 5C |       |       |      | CurveFitFailed               |
| erm(36)    | 5C | 33.05 | 87.61 | 1.91 | MultipleMeltPeaks            |
| ermA       | 5C |       |       |      | LowEfficiency, CtIsSmall, S: |
| ermA/ermTR | 5C | 37.1  | 82.18 | 1.87 |                              |
| ermB       | 5C | 26.66 | 75.03 | 2.12 |                              |
| ermC       | 5C |       |       |      | CurveFitFailed               |
| ermF       | 5C |       |       |      | LowEfficiency, CtIsSmall, S: |
| ermJ/ermD  | 5C |       |       |      | LowEfficiency, CtIsSmall, S: |
| ermK-01    | 5C | 37.48 | 79.41 | 2.04 | MultipleMeltPeaks            |
| ermK-02    | 5C | 32.35 | 87.96 | 1.86 | MultipleMeltPeaks            |
| ermT-01    | 5C |       |       |      | NoAmplification              |
| ermT-02    | 5C | 37.6  | 80.66 | 1.79 |                              |
| ermX       | 5C | 30.75 | 88.82 | 1.89 |                              |
| ermY       | 5C |       |       |      | NoAmplification              |
| fabK       | 5C | 25.78 | 79.74 | 2.15 |                              |
| floR       | 5C | 38.75 | 66.31 | 1.77 | MultipleMeltPeaks            |
| folA       | 5C |       |       |      | NoAmplification              |
| fosB       | 5C |       |       |      | LowEfficiency, CtIsSmall, S: |
| fosX       | 5C |       |       |      | NoAmplification              |
| fox5       | 5C | 27.17 | 86.61 | 1.98 |                              |
| imiR       | 5C |       |       |      | CurveFitFailed               |
| ImrA-01    | 5C | 33.45 | 82.62 | 2.02 |                              |
| intl       | 5C | 28.22 | 84.84 | 1.98 | MultipleMeltPeaks            |
| intl1      | 5C | 20.65 | 87.17 | 2.01 |                              |
| IS613      | 5C | 38.6  | 77.28 | 1.88 | MultipleMeltPeaks            |
| lnuA-01    | 5C |       |       |      | LowEfficiency, CtIsSmall, S: |
| lnuB-01    | 5C |       |       |      | NoAmplification              |
| lnuB-02    | 5C | 37.72 | 77.84 | 1.85 |                              |

|               |    |       |       |      |                              |
|---------------|----|-------|-------|------|------------------------------|
| lnuC          | 5C | 31.99 | 87.27 | 1.85 |                              |
| marR-01       | 5C | 30.34 | 85.53 | 1.93 |                              |
| matA/mel      | 5C | 24.99 | 77.52 | 2.04 |                              |
| mdet1         | 5C |       |       |      | CurveFitFailed               |
| mdtA          | 5C | 35.27 | 81.99 | 1.74 |                              |
| mdtE/yhiU     | 5C | 32.58 | 89.38 | 1.86 |                              |
| mecA          | 5C |       |       |      | CurveFitFailed               |
| mefA          | 5C | 24.1  | 80.52 | 1.95 | MultipleMeltPeaks            |
| mepA          | 5C | 30.7  | 87.18 | 1.98 |                              |
| mexA          | 5C | 33.59 | 83.26 | 1.95 | MultipleMeltPeaks            |
| mexD          | 5C | 31.96 | 80.41 | 2.04 |                              |
| mexE          | 5C | 37.46 | 83.57 | 1.68 | MultipleMeltPeaks            |
| mexF          | 5C | 27.3  | 87.18 | 2.05 | MultipleMeltPeaks            |
| mphA-01       | 5C | 30.06 | 88.21 | 1.99 |                              |
| mphA-02       | 5C | 29.11 | 87.15 | 2.05 | MultipleMeltPeaks            |
| mphB          | 5C |       |       |      | CurveFitFailed               |
| mphC          | 5C | 34.64 | 85.08 | 1.81 | MultipleMeltPeaks            |
| msrA-01       | 5C |       |       |      | NoAmplification              |
| msrC-01       | 5C |       |       |      | NoAmplification              |
| mtrC-01       | 5C | 36.95 | 84.09 | 1.75 | MultipleMeltPeaks            |
| mtrC-02       | 5C | 28.91 | 84.35 | 2    |                              |
| mtrD-02       | 5C | 26.52 | 81.49 | 1.94 | MultipleMeltPeaks            |
| mtrD-03       | 5C | 30.73 | 82.12 | 1.91 | MultipleMeltPeaks            |
| NDM1          | 5C |       |       |      | CurveFitFailed               |
| nimE          | 5C | 29.32 | 76.8  | 1.99 |                              |
| nisB          | 5C | 29.97 | 77.66 | 1.97 |                              |
| oleC          | 5C | 33.25 | 89.65 | 1.88 |                              |
| oprD          | 5C | 27.36 | 92.06 | 2.02 | MultipleMeltPeaks            |
| oprJ          | 5C | 30.78 | 88.47 | 1.92 | MultipleMeltPeaks            |
| pbp           | 5C |       |       |      | LowEfficiency, CtIsSmall, S; |
| pbp2x         | 5C |       |       |      | NoAmplification              |
| Pbp5          | 5C |       |       |      | LowEfficiency, CtIsSmall, Ci |
| penA          | 5C | 30.82 | 87.58 | 1.89 |                              |
| pikR1         | 5C | 40.68 | 78.28 | 1.74 | MultipleMeltPeaks            |
| pikR2         | 5C | 30.68 | 84.28 | 2.12 |                              |
| pmrA          | 5C | 29.04 | 79.54 | 2.09 |                              |
| pncA          | 5C | 32.41 | 89.01 | 1.85 |                              |
| putative mult | 5C | 30.25 | 84.63 | 2    |                              |
| qac           | 5C | 37.88 | 78.51 | 1.77 | MultipleMeltPeaks            |
| qacA          | 5C | 38.8  | 70.38 | 1.75 | MultipleMeltPeaks            |
| qacA/qacB     | 5C | 38.64 | 85.27 | 1.58 | MultipleMeltPeaks            |
| qacEdelta1-0  | 5C |       |       |      | LowEfficiency, CtIsSmall, Ci |
| qacEdelta1-0  | 5C | 32.39 | 89.29 | 2    |                              |
| qacH-01       | 5C | 31.42 | 86.05 | 1.95 |                              |
| qacH-02       | 5C | 35.29 | 83.66 | 1.66 |                              |
| qnrA          | 5C | 37.61 | 73.32 | 1.92 | MultipleMeltPeaks            |

|              |    |       |       |      |                              |
|--------------|----|-------|-------|------|------------------------------|
| rarD-02      | 5C |       |       |      | NoAmplification              |
| sat4         | 5C |       |       |      | CurveFitFailed               |
| sdeB         | 5C |       |       |      | CurveFitFailed               |
| spcN-01      | 5C | 36.87 | 86.85 | 1.82 |                              |
| speA         | 5C |       |       |      | NoAmplification              |
| str          | 5C |       |       |      | NoAmplification              |
| strA         | 5C |       |       |      | LowEfficiency, CtIsSmall, Ct |
| strB         | 5C | 38.25 | 83.88 | 1.74 | MultipleMeltPeaks            |
| sul1         | 5C | 31.16 | 89.76 | 1.89 |                              |
| sul2         | 5C | 33.71 | 82.86 | 1.84 |                              |
| sulA/foIP-01 | 5C | 24.41 | 82.28 | 1.97 |                              |
| sulA/foIP-03 | 5C | 25.06 | 83.21 | 1.97 |                              |
| tet(32)      | 5C |       |       |      | NoAmplification              |
| tet(34)      | 5C | 26.82 | 76.59 | 2.06 |                              |
| tet(35)      | 5C |       |       |      | NoAmplification              |
| tet(36)-A    | 5C | 36.94 | 61.67 | 1.84 | MultipleMeltPeaks            |
| tet(36)-B    | 5C |       |       |      | NoAmplification              |
| tet(37)      | 5C | 33.79 | 82.76 | 1.92 | MultipleMeltPeaks            |
| tetA-01      | 5C | 29.75 | 85.24 | 1.9  |                              |
| tetA-02      | 5C | 38.91 | 80.12 | 1.7  | MultipleMeltPeaks            |
| tetB-01      | 5C | 31.05 | 88.06 | 1.85 | MultipleMeltPeaks            |
| tetB-02      | 5C | 30.11 | 75.55 | 2.05 |                              |
| tetC-01      | 5C |       |       |      | NoAmplification              |
| tetC-02      | 5C |       |       |      | CurveFitFailed               |
| tetD-01      | 5C |       |       |      | LowEfficiency, CtIsSmall, Ct |
| tetD-02      | 5C | 34.69 | 76.43 | 2.01 |                              |
| tetE         | 5C |       |       |      | NoAmplification              |
| tetG-01      | 5C | 32.62 | 81.2  | 2.05 | MultipleMeltPeaks            |
| tetG-02      | 5C | 37.89 | 88.07 | 1.73 | MultipleMeltPeaks            |
| tetH         | 5C |       |       |      | NoAmplification              |
| tetJ         | 5C |       |       |      | CurveFitFailed               |
| tetK         | 5C |       |       |      | LowEfficiency, CtIsSmall, Ct |
| tetL-01      | 5C | 36.35 | 81.01 | 1.79 | MultipleMeltPeaks            |
| tetL-02      | 5C | 32.59 | 85.29 | 1.82 |                              |
| tetM-01      | 5C | 27.55 | 78.31 | 2.01 | MultipleMeltPeaks            |
| tetM-02      | 5C | 24.42 | 78.02 | 2.01 |                              |
| tetO-01      | 5C | 24.03 | 77.26 | 2.04 |                              |
| tetPA        | 5C |       |       |      | NoAmplification              |
| tetPB-01     | 5C |       |       |      | NoAmplification              |
| tetPB-02     | 5C | 28.06 | 85.14 | 2    |                              |
| tetPB-03     | 5C |       |       |      | CurveFitFailed               |
| tetPB-05     | 5C |       |       |      | LowEfficiency, CtIsSmall, Ct |
| tetQ         | 5C | 27.16 | 77.29 | 2.02 |                              |
| tetR-02      | 5C | 32.1  | 83.4  | 1.9  | MultipleMeltPeaks            |
| tetR-03      | 5C |       |       |      | NoAmplification              |
| tetS         | 5C | 37.77 | 85.36 | 1.83 |                              |

|             |    |       |       |      |                                          |
|-------------|----|-------|-------|------|------------------------------------------|
| tetT        | 5C | 29.76 | 74.7  | 2.11 |                                          |
| tetU-01     | 5C |       |       |      | NoAmplification                          |
| tetV        | 5C |       |       |      | NoAmplification                          |
| tetW-01     | 5C | 38.9  | 86.05 | 1.62 |                                          |
| tetX        | 5C |       |       |      | CurveFitFailed                           |
| tnpA-01     | 5C | 36.05 | 87.08 | 1.88 | MultipleMeltPeaks                        |
| tnpA-02     | 5C | 34.03 | 79.03 | 1.8  | MultipleMeltPeaks                        |
| tnpA-03     | 5C | 33.23 | 76.3  | 2.13 |                                          |
| tnpA-04     | 5C | 40.13 | 65.05 | 1.6  | MultipleMeltPeaks                        |
| tnpA-05     | 5C |       |       |      | CurveFitFailed                           |
| tnpA-07     | 5C |       |       |      | NoAmplification                          |
| tolC-01     | 5C | 33.83 | 80.12 | 1.87 |                                          |
| tolC-02     | 5C | 28.95 | 84.93 | 1.98 | MultipleMeltPeaks                        |
| tolC-03     | 5C | 28.88 | 85.94 | 1.94 |                                          |
| Tp614       | 5C | 32.21 | 73.38 | 1.98 |                                          |
| ttgA        | 5C | 33.3  | 87.53 | 1.89 |                                          |
| ttgB        | 5C | 32.39 | 85.04 | 1.97 | MultipleMeltPeaks                        |
| vanA        | 5C |       |       |      | NoAmplification                          |
| vanB-01     | 5C | 33.54 | 84.32 | 2    |                                          |
| vanC-01     | 5C | 39.56 | 72.8  | 1.79 |                                          |
| vanC-02     | 5C |       |       |      | LowEfficiency, CtIsSmall, Ci             |
| vanC-03     | 5C | 26.13 | 86.02 | 1.91 |                                          |
| vanC1       | 5C |       |       |      | NoAmplification                          |
| vanC2/vanC3 | 5C | 32.24 | 82.86 | 2.06 |                                          |
| vanG        | 5C |       |       |      | NoAmplification                          |
| vanHB       | 5C |       |       |      | CurveFitFailed                           |
| vanHD       | 5C | 33.36 | 82.73 | 1.94 |                                          |
| vanRA-01    | 5C |       |       |      | LowEfficiency, CtIsSmall, Ci             |
| vanRA-02    | 5C | 38.16 | 84.64 | 1.8  |                                          |
| vanRB       | 5C | 32.59 | 87.52 | 2    |                                          |
| vanRC       | 5C |       |       |      | LowEfficiency, CtIsSmall, Ci             |
| vanRC4      | 5C |       |       |      | LowEfficiency, CtIsSmall, Ci             |
| vanRD       | 5C |       |       |      | NoAmplification                          |
| vanSA       | 5C |       |       |      | CurveFitFailed                           |
| vanSB       | 5C | 28.8  | 75.17 | 2.09 |                                          |
| vanSC-01    | 5C | 33.39 | 84.41 | 2.03 |                                          |
| vanSC-02    | 5C | 32.15 | 76.43 | 1.87 |                                          |
| vanTC-01    | 5C |       |       |      | LowEfficiency, CtIsSmall, S <sub>c</sub> |
| vanTC-02    | 5C | 32.81 | 86.37 | 1.83 |                                          |
| vanTE       | 5C | 37.79 | 78.27 | 1.66 | MultipleMeltPeaks                        |
| vanTG       | 5C |       |       |      | BadR2, CtIsSmall, Saturatio              |
| vanWB       | 5C |       |       |      | BadR2, LowEfficiency, CtIsS              |
| vanWG       | 5C | 31.88 | 75.96 | 1.96 |                                          |
| vanXA       | 5C | 36.78 | 84.89 | 1.86 |                                          |
| vanXB       | 5C |       |       |      | NoAmplification                          |
| vanXD       | 5C | 30.1  | 75.59 | 1.94 |                                          |

|              |    |       |       |      |                              |
|--------------|----|-------|-------|------|------------------------------|
| vanYB        | 5C | 37.93 | 79.19 | 1.91 |                              |
| vanYD-01     | 5C | 32.07 | 83.09 | 1.78 |                              |
| vanYD-02     | 5C |       |       |      | LowEfficiency, CtIsSmall, S: |
| vatB-01      | 5C |       |       |      | LowEfficiency, CtIsSmall, S: |
| vatB-02      | 5C |       |       |      | CurveFitFailed               |
| vatC-01      | 5C | 32.98 | 81.25 | 1.93 |                              |
| vatC-02      | 5C | 36.45 | 85.46 | 1.86 | MultipleMeltPeaks            |
| vatE-01      | 5C | 26.61 | 77.71 | 2.11 |                              |
| vatE-02      | 5C |       |       |      | NoAmplification              |
| vgaA-01      | 5C |       |       |      | CurveFitFailed               |
| vgaA-02      | 5C | 38.05 | 81.79 | 1.85 | MultipleMeltPeaks            |
| vgb-01       | 5C | 36.02 | 83.72 | 1.86 | MultipleMeltPeaks            |
| vgbB-01      | 5C | 32.59 | 78.01 | 1.96 |                              |
| vgbB-02      | 5C |       |       |      | NoAmplification              |
| yceE/mdtG-0  | 5C | 34.62 | 81.29 | 2.01 |                              |
| yceE/mdtG-0  | 5C |       |       |      | CurveFitFailed               |
| yceL/mdtH-0  | 5C | 29.24 | 85.88 | 2.03 |                              |
| yceL/mdtH-0  | 5C |       |       |      | NoAmplification              |
| yceL/mdtH-0  | 5C | 32.27 | 77.9  | 1.95 | MultipleMeltPeaks            |
| yidY/mdtL-01 | 5C | 28.61 | 84.68 | 2    |                              |
| yidY/mdtL-02 | 5C |       |       |      | CurveFitFailed               |































| Assay          | Sample | Ct | Tm    | Efficiency | flag                               |
|----------------|--------|----|-------|------------|------------------------------------|
| 16S rRNA       | 6A     |    | 17.14 | 82.3       | 1.97                               |
| aac            | 6A     |    | 28.98 | 80.94      | 1.89 MultipleMeltPeaks             |
| aac(6')-Ib(akz | 6A     |    | 33.75 | 82.8       | 1.9 CtlIsLarge                     |
| aac(6')-Ib(akz | 6A     |    | 29.62 | 86.42      | 1.96 CtlIsLarge                    |
| aac(6')-Ib(akz | 6A     |    | 31.31 | 87.12      | 1.92 CtlIsLarge                    |
| aac(6')-II     | 6A     |    |       |            | LowEfficiency, CtlIsLarge, C       |
| aac(6')I1      | 6A     |    |       |            | NoAmplification                    |
| aacA/aphD      | 6A     |    |       |            | NoAmplification                    |
| aacC           | 6A     |    | 29.74 | 86.08      | 1.99 CtlIsLarge, MultipleMeltPeaks |
| aacC1          | 6A     |    |       |            | NoAmplification                    |
| aacC2          | 6A     |    |       |            | NoAmplification                    |
| aacC4          | 6A     |    | 31.5  | 86.88      | 1.87 CtlIsLarge                    |
| aadA-01        | 6A     |    | 29.63 | 81.84      | 1.96 CtlIsLarge                    |
| aadA-02        | 6A     |    |       |            | CtlIsLarge, CurveFitFailed         |
| aadA-1-01      | 6A     |    | 34.09 | 78.27      | 1.88 CtlIsLarge, MultipleMeltPeaks |
| aadA-1-02      | 6A     |    |       |            | NoAmplification                    |
| aadA1          | 6A     |    | 29.79 | 79.14      | 2.01 CtlIsLarge                    |
| aadA2-01       | 6A     |    |       |            | LowEfficiency, CtlIsLarge, C       |
| aadA2-02       | 6A     |    | 32.9  | 74.73      | 1.87 CtlIsLarge, SaturationBaseli  |
| aadA2-03       | 6A     |    |       |            | NoAmplification                    |
| aadA5-01       | 6A     |    | 31.67 | 86.82      | 1.94 CtlIsLarge, MultipleMeltPeaks |
| aadA5-02       | 6A     |    | 31.03 | 86.19      | 1.88 CtlIsLarge                    |
| aadA9-01       | 6A     |    | 30.52 | 89.57      | 1.91 CtlIsLarge                    |
| aadA9-02       | 6A     |    |       |            | LowEfficiency, CtlIsLarge, C       |
| aadD           | 6A     |    |       |            | NoAmplification                    |
| aadE           | 6A     |    |       |            | NoAmplification                    |
| acrA-01        | 6A     |    | 30.54 | 88.44      | 1.95 CtlIsLarge                    |
| acrA-02        | 6A     |    |       |            | LowEfficiency, CtlIsLarge, C       |
| acrA-03        | 6A     |    |       |            | CurveFitFailed                     |
| acrA-04        | 6A     |    | 30.68 | 80.38      | 1.97 CtlIsLarge                    |
| acrA-05        | 6A     |    | 29.86 | 79.9       | 1.94 CtlIsLarge, MultipleMeltPeaks |
| acrB-01        | 6A     |    | 34.81 | 76.51      | 1.86 CtlIsLarge, MultipleMeltPeaks |
| acrF           | 6A     |    | 29.84 | 84.69      | 2.04 CtlIsLarge                    |
| acrR-01        | 6A     |    |       |            | CtlIsLarge, CurveFitFailed         |
| acrR-02        | 6A     |    | 32.03 | 86.55      | 1.92 CtlIsLarge                    |
| Actin          | 6A     |    | 21.22 | 86.92      | 1.98                               |
| adeA           | 6A     |    |       |            | LowEfficiency, CtlIsLarge, C       |
| ampC-01        | 6A     |    | 31.26 | 85.95      | 1.99 CtlIsLarge, MultipleMeltPeaks |
| ampC-02        | 6A     |    |       |            | LowEfficiency, CtlIsLarge, C       |
| ampC-04        | 6A     |    | 32.35 | 84.61      | 1.89 CtlIsLarge                    |
| ampC-05        | 6A     |    |       |            | NoAmplification                    |
| ampC-06        | 6A     |    |       |            | NoAmplification                    |
| ampC-07        | 6A     |    | 33.54 | 88.2       | 1.9 CtlIsLarge                     |
| ampC-09        | 6A     |    |       |            | CurveFitFailed                     |
| ampC/blaDH     | 6A     |    | 29.19 | 84.87      | 1.98                               |

|                          |    |       |       |      |                             |
|--------------------------|----|-------|-------|------|-----------------------------|
| aph                      | 6A |       |       |      | CtIsLarge, CurveFitFailed   |
| aph(2')-Id-01            | 6A |       |       |      | NoAmplification             |
| aph(2')-Id-02            | 6A |       |       |      | NoAmplification             |
| aph6ia                   | 6A |       |       |      | NoAmplification             |
| aphA1(aka k <sub>z</sub> | 6A | 28.67 | 76    | 2.1  |                             |
| bacA-01                  | 6A |       |       |      | LowEfficiency, CtIsLarge, C |
| bacA-02                  | 6A | 34.9  | 85.57 | 1.7  | LowEfficiency, CtIsLarge, M |
| BETA-globin              | 6A | 23.18 | 83.88 | 2    |                             |
| bla-ACC-1                | 6A | 34.12 | 86    | 1.87 | CtIsLarge, MultipleMeltPea  |
| bla-L1                   | 6A | 29.06 | 85.8  | 1.99 |                             |
| bla1                     | 6A |       |       |      | NoAmplification             |
| blaCMY                   | 6A |       |       |      | CurveFitFailed              |
| blaCMY2-01               | 6A | 34.44 | 84.05 | 1.96 | CtIsLarge, MultipleMeltPea  |
| blaCMY2-02               | 6A | 27.77 | 88.41 | 2.03 |                             |
| blaCTX-M-01              | 6A |       |       |      | NoAmplification             |
| blaCTX-M-02              | 6A | 31.33 | 79.58 | 1.89 | CtIsLarge, MultipleMeltPea  |
| blaCTX-M-03              | 6A |       |       |      | NoAmplification             |
| blaCTX-M-04              | 6A | 33.37 | 87.57 | 1.94 | CtIsLarge, MultipleMeltPea  |
| blaCTX-M-05              | 6A | 31.57 | 76.54 | 1.74 | LowEfficiency, CtIsLarge, S |
| blaCTX-M-06              | 6A |       |       |      | LowEfficiency, CtIsLarge, C |
| blaGES                   | 6A |       |       |      | NoAmplification             |
| blaIMP-01                | 6A |       |       |      | NoAmplification             |
| blaIMP-02                | 6A |       |       |      | LowEfficiency, CtIsLarge, C |
| blaMOX/blaC              | 6A |       |       |      | LowEfficiency, CtIsLarge, C |
| blaOCH                   | 6A |       |       |      | NoAmplification             |
| blaOKP                   | 6A |       |       |      | NoAmplification             |
| blaOXA1/blaC             | 6A |       |       |      | NoAmplification             |
| blaOXA10-01              | 6A |       |       |      | CurveFitFailed              |
| blaOXA10-02              | 6A |       |       |      | LowEfficiency, CtIsLarge, C |
| blaOXY                   | 6A | 34.17 | 88.67 | 1.72 | LowEfficiency, CtIsLarge, M |
| blaPAO                   | 6A |       |       |      | NoAmplification             |
| blaPER                   | 6A |       |       |      | LowEfficiency, CtIsLarge, C |
| blaPSE                   | 6A |       |       |      | NoAmplification             |
| blaROB                   | 6A |       |       |      | NoAmplification             |
| blaSFO                   | 6A | 29.89 | 87.03 | 1.95 | CtIsLarge, MultipleMeltPea  |
| blaSHV-01                | 6A | 33.24 | 81.01 | 1.76 | LowEfficiency, CtIsLarge    |
| blaSHV-02                | 6A |       |       |      | LowEfficiency, CtIsLarge, C |
| blaTEM                   | 6A | 34.98 | 84.14 | 1.79 | LowEfficiency, CtIsLarge    |
| blaTLA                   | 6A |       |       |      | NoAmplification             |
| blaVEB                   | 6A |       |       |      | NoAmplification             |
| blaVIM                   | 6A |       |       |      | NoAmplification             |
| blaZ                     | 6A |       |       |      | NoAmplification             |
| carB                     | 6A |       |       |      | CtIsLarge, CurveFitFailed   |
| catA1                    | 6A |       |       |      | NoAmplification             |
| catB3                    | 6A | 33.55 | 87.56 | 1.9  | CtIsLarge                   |
| catB8                    | 6A | 27.58 | 82.65 | 1.97 |                             |

|            |    |       |       |      |                             |
|------------|----|-------|-------|------|-----------------------------|
| ceoA       | 6A | 26.99 | 82.11 | 1.96 | MultipleMeltPeaks           |
| cepA       | 6A |       |       |      | NoAmplification             |
| cfiA       | 6A | 29.42 | 86.43 | 1.95 | SaturationBaselineRatiosL   |
| cfr        | 6A |       |       |      | NoAmplification             |
| cfxA       | 6A | 25.74 | 77.41 | 2.05 |                             |
| cmeA       | 6A |       |       |      | NoAmplification             |
| cmlA1-01   | 6A |       |       |      | LowEfficiency, CtIsLarge, C |
| cmlA1-02   | 6A |       |       |      | LowEfficiency, CtIsLarge, C |
| cmr        | 6A | 34.52 | 78.61 | 1.87 | CtIsLarge                   |
| cmx(A)     | 6A | 26.71 | 84.38 | 1.95 | MultipleMeltPeaks           |
| cphA-01    | 6A | 29.18 | 88.72 | 1.99 |                             |
| cphA-02    | 6A | 32.96 | 82.01 | 1.97 | CtIsLarge                   |
| dfrA1      | 6A | 31.73 | 87.72 | 1.97 | CtIsLarge                   |
| dfrA12     | 6A |       |       |      | LowEfficiency, CtIsLarge, C |
| emrD       | 6A | 33.15 | 79.51 | 1.86 | CtIsLarge, MultipleMeltPea  |
| ereA       | 6A |       |       |      | LowEfficiency, CtIsLarge, C |
| ereB       | 6A | 31.33 | 75.56 | 1.78 | LowEfficiency, CtIsLarge, M |
| erm(34)    | 6A |       |       |      | NoAmplification             |
| erm(35)    | 6A |       |       |      | NoAmplification             |
| erm(36)    | 6A |       |       |      | LowEfficiency, CtIsLarge, C |
| ermA       | 6A |       |       |      | NoAmplification             |
| ermA/ermTR | 6A |       |       |      | NoAmplification             |
| ermB       | 6A | 26.75 | 75.13 | 2.12 |                             |
| ermC       | 6A |       |       |      | CurveFitFailed              |
| ermF       | 6A | 28.58 | 74.39 | 2.03 |                             |
| ermJ/ermD  | 6A |       |       |      | NoAmplification             |
| ermK-01    | 6A |       |       |      | LowEfficiency, CtIsLarge, C |
| ermK-02    | 6A | 33.41 | 87.82 | 1.88 | CtIsLarge                   |
| ermT-01    | 6A |       |       |      | NoAmplification             |
| ermT-02    | 6A |       |       |      | CtIsLarge, CurveFitFailed   |
| ermX       | 6A | 33.52 | 86.04 | 1.8  | LowEfficiency, CtIsLarge    |
| ermY       | 6A |       |       |      | NoAmplification             |
| fabK       | 6A | 20.61 | 77.52 | 2.14 |                             |
| floR       | 6A |       |       |      | LowEfficiency, CtIsLarge, C |
| folA       | 6A |       |       |      | NoAmplification             |
| fosB       | 6A |       |       |      | LowEfficiency, CtIsSmall, S |
| fosX       | 6A |       |       |      | NoAmplification             |
| fox5       | 6A | 26.94 | 87.11 | 1.98 | MultipleMeltPeaks           |
| imiR       | 6A |       |       |      | CurveFitFailed              |
| ImrA-01    | 6A |       |       |      | NoAmplification             |
| intl       | 6A | 29.04 | 84.76 | 1.97 | MultipleMeltPeaks           |
| intl1      | 6A | 19.68 | 87.22 | 1.99 |                             |
| IS613      | 6A | 26.92 | 79.54 | 2.03 |                             |
| lnuA-01    | 6A |       |       |      | NoAmplification             |
| lnuB-01    | 6A |       |       |      | NoAmplification             |
| lnuB-02    | 6A |       |       |      | NoAmplification             |

|              |    |       |       |                                   |
|--------------|----|-------|-------|-----------------------------------|
| lnuC         | 6A | 30.64 | 87.55 | 1.88 CtlIsLarge                   |
| marR-01      | 6A | 33.65 | 85.08 | 1.88 CtlIsLarge                   |
| matA/mel     | 6A | 23.73 | 77.51 | 2.04                              |
| mdet1        | 6A |       |       | NoAmplification                   |
| mdtA         | 6A |       |       | LowEfficiency, CtlIsLarge, C      |
| mdtE/yhiU    | 6A |       |       | LowEfficiency, CtlIsLarge, C      |
| mecA         | 6A |       |       | NoAmplification                   |
| mefA         | 6A | 22.79 | 80.46 | 1.96                              |
| mepA         | 6A | 30.66 | 87.01 | 2.01 CtlIsLarge                   |
| mexA         | 6A |       |       | CurveFitFailed                    |
| mexD         | 6A | 33.35 | 79.91 | 2.02 CtlIsLarge                   |
| mexE         | 6A | 32.48 | 81.88 | 1.92 CtlIsLarge                   |
| mexF         | 6A | 27.77 | 87.32 | 2.08                              |
| mphA-01      | 6A | 28.24 | 87.32 | 2 MultipleMeltPeaks               |
| mphA-02      | 6A | 28.5  | 88.36 | 2.01                              |
| mphB         | 6A | 32.37 | 82.03 | 2.08 CtlIsLarge                   |
| mphC         | 6A |       |       | LowEfficiency, CtlIsLarge, C      |
| msrA-01      | 6A |       |       | NoAmplification                   |
| msrC-01      | 6A |       |       | LowEfficiency, CtlIsLarge, C      |
| mtrC-01      | 6A |       |       | LowEfficiency, CtlIsLarge, C      |
| mtrC-02      | 6A | 33.37 | 84.3  | 1.94 CtlIsLarge                   |
| mtrD-02      | 6A | 27.36 | 85.09 | 1.93 MultipleMeltPeaks            |
| mtrD-03      | 6A | 34.5  | 81.93 | 1.83 CtlIsLarge, MultipleMeltPea  |
| NDM1         | 6A | 30.45 | 79.27 | 1.99 CtlIsLarge                   |
| nimE         | 6A |       |       | NoAmplification                   |
| nisB         | 6A |       |       | CtlIsLarge, CurveFitFailed        |
| oleC         | 6A |       |       | LowEfficiency, CtlIsLarge, C      |
| oprD         | 6A | 27.53 | 85.34 | 2.01 MultipleMeltPeaks            |
| oprJ         | 6A | 30.86 | 87.66 | 1.8 CtlIsLarge                    |
| pbp          | 6A |       |       | NoAmplification                   |
| pbp2x        | 6A | 19.83 | 75.95 | 2.07                              |
| Pbp5         | 6A |       |       | NoAmplification                   |
| penA         | 6A |       |       | LowEfficiency, CtlIsLarge, C      |
| pikR1        | 6A |       |       | LowEfficiency, CtlIsLarge, C      |
| pikR2        | 6A | 30.05 | 84.84 | 2.02 CtlIsLarge                   |
| pmrA         | 6A | 20.16 | 79.84 | 2.09                              |
| pncA         | 6A | 32.47 | 79.54 | 1.83 CtlIsLarge, MultipleMeltPea  |
| putative mul | 6A | 30.26 | 83.98 | 1.98 CtlIsLarge                   |
| qac          | 6A | 33.4  | 78.44 | 1.93 CtlIsLarge, MultipleMeltPea  |
| qacA         | 6A |       |       | NoAmplification                   |
| qacA/qacB    | 6A |       |       | LowEfficiency, CtlIsLarge, C      |
| qacEdelta1-0 | 6A |       |       | NoAmplification                   |
| qacEdelta1-0 | 6A | 31.28 | 78.09 | 2.01 CtlIsLarge                   |
| qacH-01      | 6A | 31.65 | 86.12 | 1.94 CtlIsLarge                   |
| qacH-02      | 6A | 34.74 | 83.97 | 1.65 LowEfficiency, CtlIsLarge, M |
| qnrA         | 6A | 34.81 | 78.82 | 1.95 CtlIsLarge                   |



|              |    |       |       |      |                             |
|--------------|----|-------|-------|------|-----------------------------|
| rarD-02      | 6A | 31.85 | 85.7  | 1.94 | CtIsLarge                   |
| sat4         | 6A |       |       |      | NoAmplification             |
| sdeB         | 6A |       |       |      | LowEfficiency, CtIsLarge, C |
| spcN-01      | 6A |       |       |      | LowEfficiency, CtIsLarge, C |
| speA         | 6A |       |       |      | NoAmplification             |
| str          | 6A |       |       |      | NoAmplification             |
| strA         | 6A |       |       |      | NoAmplification             |
| strB         | 6A |       |       |      | NoAmplification             |
| sul1         | 6A | 32.04 | 89.57 | 1.83 | CtIsLarge                   |
| sul2         | 6A |       |       |      | NoAmplification             |
| sulA/foIP-01 | 6A | 19.7  | 81.32 | 1.96 |                             |
| sulA/foIP-03 | 6A | 19.32 | 83.3  | 1.97 |                             |
| tet(32)      | 6A | 27.41 | 86.5  | 2.02 | MultipleMeltPeaks           |
| tet(34)      | 6A | 32.52 | 75.53 | 1.91 | CtIsLarge                   |
| tet(35)      | 6A | 28.57 | 77.33 | 2.02 |                             |
| tet(36)-A    | 6A | 33.59 | 82.1  | 1.99 | CtIsLarge                   |
| tet(36)-B    | 6A |       |       |      | LowEfficiency, CtIsLarge, C |
| tet(37)      | 6A | 28.25 | 86.37 | 1.97 | MultipleMeltPeaks           |
| tetA-01      | 6A | 24.84 | 75.62 | 1.95 | MultipleMeltPeaks           |
| tetA-02      | 6A |       |       |      | LowEfficiency, CtIsLarge, C |
| tetB-01      | 6A | 30.16 | 86.66 | 1.93 | CtIsLarge                   |
| tetB-02      | 6A |       |       |      | LowEfficiency, CtIsLarge, C |
| tetC-01      | 6A |       |       |      | NoAmplification             |
| tetC-02      | 6A |       |       |      | NoAmplification             |
| tetD-01      | 6A |       |       |      | NoAmplification             |
| tetD-02      | 6A |       |       |      | NoAmplification             |
| tetE         | 6A |       |       |      | NoAmplification             |
| tetG-01      | 6A |       |       |      | NoAmplification             |
| tetG-02      | 6A |       |       |      | NoAmplification             |
| tetH         | 6A |       |       |      | NoAmplification             |
| tetJ         | 6A |       |       |      | NoAmplification             |
| tetK         | 6A |       |       |      | NoAmplification             |
| tetL-01      | 6A |       |       |      | NoAmplification             |
| tetL-02      | 6A |       |       |      | NoAmplification             |
| tetM-01      | 6A |       |       |      | NoAmplification             |
| tetM-02      | 6A | 24.85 | 77.51 | 1.98 |                             |
| tetO-01      | 6A | 27.75 | 76.68 | 2.04 |                             |
| tetPA        | 6A |       |       |      | NoAmplification             |
| tetPB-01     | 6A | 33.04 | 83.11 | 1.93 | CtIsLarge                   |
| tetPB-02     | 6A | 28.94 | 84.75 | 1.98 |                             |
| tetPB-03     | 6A |       |       |      | NoAmplification             |
| tetPB-05     | 6A |       |       |      | NoAmplification             |
| tetQ         | 6A | 28.43 | 75.99 | 2.05 |                             |
| tetR-02      | 6A | 29.81 | 85.12 | 1.91 | CtIsLarge                   |
| tetR-03      | 6A |       |       |      | NoAmplification             |
| tetS         | 6A | 34.34 | 85.27 | 2.02 | CtIsLarge                   |

|             |    |       |       |      |                             |
|-------------|----|-------|-------|------|-----------------------------|
| tetT        | 6A |       |       |      | NoAmplification             |
| tetU-01     | 6A |       |       |      | NoAmplification             |
| tetV        | 6A |       |       |      | NoAmplification             |
| tetW-01     | 6A |       |       |      | NoAmplification             |
| tetX        | 6A |       |       |      | NoAmplification             |
| tnpA-01     | 6A |       |       |      | NoAmplification             |
| tnpA-02     | 6A | 34.81 | 84.5  | 1.8  | LowEfficiency, CtIsLarge, M |
| tnpA-03     | 6A | 26.36 | 77.89 | 2.09 |                             |
| tnpA-04     | 6A |       |       |      | CurveFitFailed              |
| tnpA-05     | 6A |       |       |      | CurveFitFailed              |
| tnpA-07     | 6A |       |       |      | NoAmplification             |
| tolC-01     | 6A | 33.49 | 88.95 | 1.88 | CtIsLarge, MultipleMeltPea  |
| tolC-02     | 6A | 29.28 | 87.13 | 1.99 |                             |
| tolC-03     | 6A | 29.22 | 87.47 | 1.98 | MultipleMeltPeaks           |
| Tp614       | 6A | 31.75 | 83.4  | 1.95 | CtIsLarge                   |
| ttgA        | 6A |       |       |      | NoAmplification             |
| ttgB        | 6A | 32.98 | 84.8  | 2    | CtIsLarge                   |
| vanA        | 6A |       |       |      | NoAmplification             |
| vanB-01     | 6A | 30.15 | 81.07 | 1.98 | CtIsLarge, MultipleMeltPea  |
| vanC-01     | 6A |       |       |      | NoAmplification             |
| vanC-02     | 6A |       |       |      | CurveFitFailed              |
| vanC-03     | 6A | 25.93 | 85.34 | 1.9  |                             |
| vanC1       | 6A |       |       |      | NoAmplification             |
| vanC2/vanC3 | 6A | 32.62 | 84.26 | 1.97 | CtIsLarge, MultipleMeltPea  |
| vanG        | 6A |       |       |      | NoAmplification             |
| vanHB       | 6A |       |       |      | LowEfficiency, CtIsLarge, C |
| vanHD       | 6A | 34.74 | 82.77 | 1.88 | CtIsLarge                   |
| vanRA-01    | 6A |       |       |      | NoAmplification             |
| vanRA-02    | 6A |       |       |      | NoAmplification             |
| vanRB       | 6A | 29.09 | 87.4  | 2.15 |                             |
| vanRC       | 6A |       |       |      | NoAmplification             |
| vanRC4      | 6A |       |       |      | NoAmplification             |
| vanRD       | 6A |       |       |      | CurveFitFailed              |
| vanSA       | 6A |       |       |      | NoAmplification             |
| vanSB       | 6A | 29    | 74.62 | 2.09 |                             |
| vanSC-01    | 6A | 34.2  | 83.85 | 1.93 | CtIsLarge                   |
| vanSC-02    | 6A |       |       |      | NoAmplification             |
| vanTC-01    | 6A |       |       |      | NoAmplification             |
| vanTC-02    | 6A |       |       |      | LowEfficiency, CtIsLarge, C |
| vanTE       | 6A | 32.2  | 88.1  | 1.9  | CtIsLarge                   |
| vanTG       | 6A |       |       |      | NoAmplification             |
| vanWB       | 6A |       |       |      | NoAmplification             |
| vanWG       | 6A |       |       |      | CurveFitFailed              |
| vanXA       | 6A |       |       |      | LowEfficiency, CtIsLarge, C |
| vanXB       | 6A |       |       |      | NoAmplification             |
| vanXD       | 6A | 31.23 | 74.22 | 1.93 | CtIsLarge                   |

|              |    |       |       |      |                              |
|--------------|----|-------|-------|------|------------------------------|
| vanYB        | 6A |       |       |      | LowEfficiency, CtIsLarge, Ci |
| vanYD-01     | 6A | 32.34 | 86.12 | 1.76 | LowEfficiency, CtIsLarge, M  |
| vanYD-02     | 6A |       |       |      | NoAmplification              |
| vatB-01      | 6A |       |       |      | CtIsLarge, CurveFitFailed    |
| vatB-02      | 6A |       |       |      | CtIsLarge, CurveFitFailed    |
| vatC-01      | 6A | 33.81 | 80.99 | 1.88 | CtIsLarge                    |
| vatC-02      | 6A | 31.97 | 83.08 | 1.92 | CtIsLarge, MultipleMeltPea   |
| vatE-01      | 6A | 27.66 | 77.43 | 2.12 |                              |
| vatE-02      | 6A |       |       |      | NoAmplification              |
| vgaA-01      | 6A |       |       |      | NoAmplification              |
| vgaA-02      | 6A |       |       |      | NoAmplification              |
| vgb-01       | 6A |       |       |      | CurveFitFailed               |
| vgbB-01      | 6A |       |       |      | LowEfficiency, CtIsLarge, Ci |
| vgbB-02      | 6A |       |       |      | NoAmplification              |
| yceE/mdtG-0  | 6A | 34.24 | 82.66 | 2.04 | CtIsLarge                    |
| yceE/mdtG-0  | 6A |       |       |      | LowEfficiency, CtIsLarge, Ci |
| yceL/mdtH-0  | 6A | 29    | 85.98 | 1.95 | MultipleMeltPeaks            |
| yceL/mdtH-0  | 6A |       |       |      | NoAmplification              |
| yceL/mdtH-0  | 6A |       |       |      | CtIsLarge, CurveFitFailed    |
| yidY/mdtL-01 | 6A | 29.11 | 86.44 | 1.96 | MultipleMeltPeaks            |
| yidY/mdtL-02 | 6A |       |       |      | NoAmplification              |































| Assay          | Sample | Ct | Tm    | Efficiency | flag                   |
|----------------|--------|----|-------|------------|------------------------|
| 16S rRNA       | 6B     |    | 16.18 | 82.34      | 2.06                   |
| aac            | 6B     |    | 28.6  | 81.53      | 1.83 MultipleMeltPeaks |
| aac(6')-Ib(akz | 6B     |    | 37.79 | 80.89      | 1.85                   |
| aac(6')-Ib(akz | 6B     |    | 31.02 | 88.64      | 1.95                   |
| aac(6')-Ib(akz | 6B     |    | 32.05 | 79.7       | 1.95 MultipleMeltPeaks |
| aac(6')-II     | 6B     |    | 33.56 | 87.58      | 1.8 MultipleMeltPeaks  |
| aac(6')I1      | 6B     |    | 35.36 | 89.42      | 1.77                   |
| aacA/aphD      | 6B     |    |       |            | NoAmplification        |
| aacC           | 6B     |    | 34.79 | 84.24      | 1.81 MultipleMeltPeaks |
| aacC1          | 6B     |    |       |            | NoAmplification        |
| aacC2          | 6B     |    |       |            | NoAmplification        |
| aacC4          | 6B     |    | 34.39 | 89.53      | 1.95 MultipleMeltPeaks |
| aadA-01        | 6B     |    |       |            | NoAmplification        |
| aadA-02        | 6B     |    | 34.28 | 80.41      | 1.95                   |
| aadA-1-01      | 6B     |    | 35.88 | 78.87      | 1.93 MultipleMeltPeaks |
| aadA-1-02      | 6B     |    |       |            | NoAmplification        |
| aadA1          | 6B     |    | 34.66 | 84.55      | 1.91                   |
| aadA2-01       | 6B     |    | 39.22 | 85.3       | 1.66 MultipleMeltPeaks |
| aadA2-02       | 6B     |    |       |            | NoAmplification        |
| aadA2-03       | 6B     |    |       |            | NoAmplification        |
| aadA5-01       | 6B     |    | 34.93 | 84.6       | 1.91 MultipleMeltPeaks |
| aadA5-02       | 6B     |    | 33.21 | 80.8       | 2.03 MultipleMeltPeaks |
| aadA9-01       | 6B     |    | 33.07 | 89.73      | 1.93 MultipleMeltPeaks |
| aadA9-02       | 6B     |    | 33.84 | 80.34      | 1.95 MultipleMeltPeaks |
| aadD           | 6B     |    |       |            | NoAmplification        |
| aadE           | 6B     |    |       |            | NoAmplification        |
| acrA-01        | 6B     |    | 31.07 | 89.01      | 1.92                   |
| acrA-02        | 6B     |    | 30.02 | 84.04      | 1.92                   |
| acrA-03        | 6B     |    | 34.66 | 79.86      | 1.84 MultipleMeltPeaks |
| acrA-04        | 6B     |    | 30.1  | 80.56      | 1.91 MultipleMeltPeaks |
| acrA-05        | 6B     |    | 30.64 | 88.23      | 1.95                   |
| acrB-01        | 6B     |    | 33.95 | 76.68      | 1.95 MultipleMeltPeaks |
| acrF           | 6B     |    | 29.59 | 84.68      | 1.83                   |
| acrR-01        | 6B     |    | 31.08 | 89.42      | 1.92                   |
| acrR-02        | 6B     |    | 32.77 | 85.82      | 1.98                   |
| Actin          | 6B     |    | 21.41 | 87.09      | 1.98                   |
| adeA           | 6B     |    | 32.67 | 88.05      | 1.94                   |
| ampC-01        | 6B     |    | 30.39 | 85.32      | 1.93                   |
| ampC-02        | 6B     |    | 39.74 | 82.49      | 1.76                   |
| ampC-04        | 6B     |    | 31.09 | 78.79      | 1.83                   |
| ampC-05        | 6B     |    |       |            | NoAmplification        |
| ampC-06        | 6B     |    |       |            | CurveFitFailed         |
| ampC-07        | 6B     |    | 33.84 | 88.38      | 1.84                   |
| ampC-09        | 6B     |    |       |            | NoAmplification        |
| ampC/blaDH     | 6B     |    | 28.72 | 84.65      | 1.96 MultipleMeltPeaks |

|                            |    |       |       |      |                   |
|----------------------------|----|-------|-------|------|-------------------|
| aph                        | 6B |       |       |      | NoAmplification   |
| aph(2')-Id-01              | 6B |       |       |      | NoAmplification   |
| aph(2')-Id-02              | 6B |       |       |      | NoAmplification   |
| aph6ia                     | 6B | 38.23 | 79.01 | 1.94 |                   |
| aphA1(aka k <sub>z</sub> ) | 6B |       |       |      | NoAmplification   |
| bacA-01                    | 6B | 36.3  | 87.19 | 1.84 |                   |
| bacA-02                    | 6B | 35.28 | 88.31 | 1.72 |                   |
| BETA-globin                | 6B | 23.35 | 84.11 | 1.95 |                   |
| bla-ACC-1                  | 6B | 35.02 | 86.06 | 1.85 |                   |
| bla-L1                     | 6B | 29.07 | 85.73 | 1.94 |                   |
| bla1                       | 6B |       |       |      | NoAmplification   |
| blaCMY                     | 6B | 37.66 | 87.02 | 1.8  | MultipleMeltPeaks |
| blaCMY2-01                 | 6B | 36.47 | 87.48 | 1.91 | MultipleMeltPeaks |
| blaCMY2-02                 | 6B | 28.32 | 87.88 | 1.97 | MultipleMeltPeaks |
| blaCTX-M-01                | 6B | 38.33 | 87.16 | 1.76 | MultipleMeltPeaks |
| blaCTX-M-02                | 6B | 31.78 | 79.74 | 1.89 | MultipleMeltPeaks |
| blaCTX-M-03                | 6B | 38.92 | 64.2  | 1.71 | MultipleMeltPeaks |
| blaCTX-M-04                | 6B | 33.03 | 87.45 | 1.88 |                   |
| blaCTX-M-05                | 6B | 33.5  | 84.62 | 1.81 |                   |
| blaCTX-M-06                | 6B |       |       |      | NoAmplification   |
| blaGES                     | 6B |       |       |      | NoAmplification   |
| blaIMP-01                  | 6B |       |       |      | NoAmplification   |
| blaIMP-02                  | 6B |       |       |      | NoAmplification   |
| blaMOX/blaC                | 6B | 37.21 | 81.83 | 1.87 |                   |
| blaOCH                     | 6B |       |       |      | NoAmplification   |
| blaOKP                     | 6B |       |       |      | NoAmplification   |
| blaOXA1/blaC               | 6B |       |       |      | NoAmplification   |
| blaOXA10-01                | 6B | 42.84 | 62.39 | 1.69 | MultipleMeltPeaks |
| blaOXA10-02                | 6B |       |       |      | NoAmplification   |
| blaOXY                     | 6B | 32.35 | 85.76 | 1.8  | MultipleMeltPeaks |
| blaPAO                     | 6B | 42.72 | 80.62 | 1.64 | MultipleMeltPeaks |
| blaPER                     | 6B | 36.67 | 70.01 | 1.59 | MultipleMeltPeaks |
| blaPSE                     | 6B | 37.64 | 88.34 | 1.68 |                   |
| blaROB                     | 6B | 35.87 | 80.06 | 1.86 |                   |
| blaSFO                     | 6B | 31.63 | 88.97 | 1.93 | MultipleMeltPeaks |
| blaSHV-01                  | 6B | 30.94 | 87.72 | 1.9  | MultipleMeltPeaks |
| blaSHV-02                  | 6B | 42.13 | 79.65 | 1.66 | MultipleMeltPeaks |
| blaTEM                     | 6B | 33.69 | 82    | 1.66 |                   |
| blaTLA                     | 6B |       |       |      | NoAmplification   |
| blaVEB                     | 6B |       |       |      | NoAmplification   |
| blaVIM                     | 6B |       |       |      | NoAmplification   |
| blaZ                       | 6B |       |       |      | NoAmplification   |
| carB                       | 6B | 37.36 | 82.47 | 1.81 | MultipleMeltPeaks |
| catA1                      | 6B |       |       |      | NoAmplification   |
| catB3                      | 6B | 37.89 | 79.82 | 1.73 | MultipleMeltPeaks |
| catB8                      | 6B | 27.49 | 81.86 | 1.97 |                   |

|            |    |       |       |      |                              |
|------------|----|-------|-------|------|------------------------------|
| ceoA       | 6B | 28.1  | 85.61 | 1.94 | MultipleMeltPeaks            |
| cepA       | 6B |       |       |      | NoAmplification              |
| cfiA       | 6B | 30.48 | 86.67 | 1.74 |                              |
| cfr        | 6B |       |       |      | NoAmplification              |
| cfxA       | 6B | 25.72 | 77.61 | 2.04 |                              |
| cmeA       | 6B |       |       |      | NoAmplification              |
| cmlA1-01   | 6B | 36.96 | 87.68 | 1.85 | MultipleMeltPeaks            |
| cmlA1-02   | 6B |       |       |      | NoAmplification              |
| cmr        | 6B |       |       |      | CurveFitFailed               |
| cmx(A)     | 6B | 27.01 | 86.75 | 2.01 |                              |
| cphA-01    | 6B | 32.32 | 85.5  | 2    | MultipleMeltPeaks            |
| cphA-02    | 6B | 36.06 | 82.46 | 1.83 |                              |
| dfrA1      | 6B | 34.72 | 83.27 | 1.91 |                              |
| dfrA12     | 6B | 35.67 | 82.5  | 1.78 | MultipleMeltPeaks            |
| emrD       | 6B | 33.45 | 84.31 | 1.92 |                              |
| ereA       | 6B | 32.74 | 83.2  | 2.01 |                              |
| ereB       | 6B | 36.09 | 88.62 | 1.81 |                              |
| erm(34)    | 6B |       |       |      | NoAmplification              |
| erm(35)    | 6B | 38.84 | 78.42 | 1.77 |                              |
| erm(36)    | 6B | 30.58 | 86.09 | 2.1  |                              |
| ermA       | 6B |       |       |      | NoAmplification              |
| ermA/ermTR | 6B |       |       |      | NoAmplification              |
| ermB       | 6B |       |       |      | NoAmplification              |
| ermC       | 6B | 37.95 | 63.06 | 1.95 | MultipleMeltPeaks            |
| ermF       | 6B | 28.45 | 74.73 | 2.02 |                              |
| ermJ/ermD  | 6B |       |       |      | NoAmplification              |
| ermK-01    | 6B | 35.97 | 89.1  | 1.85 |                              |
| ermK-02    | 6B | 31.46 | 85.82 | 1.94 |                              |
| ermT-01    | 6B |       |       |      | NoAmplification              |
| ermT-02    | 6B | 32.62 | 79.72 | 2.04 |                              |
| ermX       | 6B | 29.29 | 83.29 | 1.88 | MultipleMeltPeaks            |
| ermY       | 6B |       |       |      | NoAmplification              |
| fabK       | 6B | 24.74 | 79.42 | 2.13 |                              |
| floR       | 6B |       |       |      | NoAmplification              |
| folA       | 6B |       |       |      | NoAmplification              |
| fosB       | 6B |       |       |      | LowEfficiency, CtIsSmall, S: |
| fosX       | 6B |       |       |      | NoAmplification              |
| fox5       | 6B | 28.07 | 87.62 | 1.95 | MultipleMeltPeaks            |
| imiR       | 6B |       |       |      | NoAmplification              |
| ImrA-01    | 6B | 32.77 | 82.68 | 1.97 |                              |
| intl       | 6B | 28.42 | 86.35 | 2    |                              |
| intl1      | 6B | 20.91 | 87.24 | 1.96 |                              |
| IS613      | 6B | 26.09 | 79.57 | 2.07 |                              |
| lnuA-01    | 6B |       |       |      | NoAmplification              |
| lnuB-01    | 6B |       |       |      | NoAmplification              |
| lnuB-02    | 6B |       |       |      | NoAmplification              |

|               |    |       |       |      |                   |
|---------------|----|-------|-------|------|-------------------|
| lnuC          | 6B | 31.18 | 84.56 | 1.88 |                   |
| marR-01       | 6B | 33.8  | 85.23 | 1.91 |                   |
| matA/mel      | 6B | 21.74 | 77.35 | 2.05 |                   |
| mdet1         | 6B |       |       |      | NoAmplification   |
| mdtA          | 6B | 32.88 | 82.58 | 1.78 |                   |
| mdtE/yhiU     | 6B |       |       |      | NoAmplification   |
| mecA          | 6B |       |       |      | NoAmplification   |
| mefA          | 6B | 21.23 | 80.49 | 1.97 |                   |
| mepA          | 6B | 31.66 | 84.8  | 1.95 |                   |
| mexA          | 6B | 36.43 | 74.12 | 1.85 | MultipleMeltPeaks |
| mexD          | 6B | 34.01 | 80.1  | 2.01 |                   |
| mexE          | 6B | 36.73 | 83.28 | 1.78 |                   |
| mexF          | 6B | 24.21 | 80.99 | 1.9  | MultipleMeltPeaks |
| mphA-01       | 6B | 29.89 | 88.09 | 1.99 |                   |
| mphA-02       | 6B | 27.77 | 86.88 | 1.69 | MultipleMeltPeaks |
| mphB          | 6B |       |       |      | CurveFitFailed    |
| mphC          | 6B | 34    | 86.42 | 1.8  | MultipleMeltPeaks |
| msrA-01       | 6B |       |       |      | NoAmplification   |
| msrC-01       | 6B |       |       |      | NoAmplification   |
| mtrC-01       | 6B | 35.98 | 84.11 | 1.85 |                   |
| mtrC-02       | 6B | 33.42 | 84.28 | 1.9  |                   |
| mtrD-02       | 6B | 27.26 | 84.67 | 1.9  | MultipleMeltPeaks |
| mtrD-03       | 6B | 32.31 | 82.01 | 1.93 |                   |
| NDM1          | 6B |       |       |      | NoAmplification   |
| nimE          | 6B | 30.79 | 76.28 | 1.94 | MultipleMeltPeaks |
| nisB          | 6B | 35.45 | 85.58 | 1.8  |                   |
| oleC          | 6B | 33.21 | 82.39 | 1.9  |                   |
| oprD          | 6B | 27.72 | 81.72 | 2    | MultipleMeltPeaks |
| oprJ          | 6B | 30.76 | 91.87 | 1.96 |                   |
| pbp           | 6B | 38.37 | 81.36 | 1.76 |                   |
| pbp2x         | 6B | 27.37 | 74.99 | 2.05 |                   |
| Pbp5          | 6B |       |       |      | NoAmplification   |
| penA          | 6B | 33.88 | 87.94 | 1.81 |                   |
| pikR1         | 6B | 35.12 | 81.96 | 1.91 | MultipleMeltPeaks |
| pikR2         | 6B | 32.23 | 84.89 | 2.04 |                   |
| pmrA          | 6B | 24.98 | 79.46 | 2.12 |                   |
| pncA          | 6B | 31.98 | 89.24 | 1.93 |                   |
| putative mult | 6B | 34.14 | 84.58 | 1.97 | MultipleMeltPeaks |
| qac           | 6B | 34.35 | 88.98 | 1.94 | MultipleMeltPeaks |
| qacA          | 6B | 32.9  | 70.43 | 1.69 |                   |
| qacA/qacB     | 6B |       |       |      | CurveFitFailed    |
| qacEdelta1-0  | 6B |       |       |      | NoAmplification   |
| qacEdelta1-0  | 6B | 32.05 | 87.49 | 1.98 | MultipleMeltPeaks |
| qacH-01       | 6B | 31.47 | 82.06 | 1.99 | MultipleMeltPeaks |
| qacH-02       | 6B | 32.12 | 83.96 | 1.69 |                   |
| qnrA          | 6B | 38.12 | 62.92 | 1.8  | MultipleMeltPeaks |

|              |    |       |       |      |                   |
|--------------|----|-------|-------|------|-------------------|
| rarD-02      | 6B | 33.6  | 85.68 | 2    | MultipleMeltPeaks |
| sat4         | 6B |       |       |      | NoAmplification   |
| sdeB         | 6B | 37.31 | 62.16 | 1.76 | MultipleMeltPeaks |
| spcN-01      | 6B | 37.26 | 84.55 | 1.8  | MultipleMeltPeaks |
| speA         | 6B |       |       |      | NoAmplification   |
| str          | 6B |       |       |      | NoAmplification   |
| strA         | 6B |       |       |      | NoAmplification   |
| strB         | 6B | 37.83 | 84.48 | 1.73 | MultipleMeltPeaks |
| sul1         | 6B | 32.37 | 90.18 | 1.92 |                   |
| sul2         | 6B |       |       |      | NoAmplification   |
| sulA/foIP-01 | 6B | 23.63 | 80.89 | 2    |                   |
| sulA/foIP-03 | 6B | 21.58 | 83.14 | 1.83 |                   |
| tet(32)      | 6B |       |       |      | NoAmplification   |
| tet(34)      | 6B | 27.84 | 76.32 | 2.04 |                   |
| tet(35)      | 6B | 37.15 | 75.58 | 1.93 |                   |
| tet(36)-A    | 6B |       |       |      | NoAmplification   |
| tet(36)-B    | 6B |       |       |      | NoAmplification   |
| tet(37)      | 6B | 29.94 | 80.19 | 1.94 | MultipleMeltPeaks |
| tetA-01      | 6B | 29.65 | 85.19 | 1.95 |                   |
| tetA-02      | 6B | 38.31 | 87.39 | 1.71 | MultipleMeltPeaks |
| tetB-01      | 6B | 30.79 | 86.45 | 1.99 | MultipleMeltPeaks |
| tetB-02      | 6B | 32.39 | 84.68 | 1.85 |                   |
| tetC-01      | 6B |       |       |      | NoAmplification   |
| tetC-02      | 6B | 28.55 | 76.02 | 2.04 |                   |
| tetD-01      | 6B |       |       |      | NoAmplification   |
| tetD-02      | 6B | 40.53 | 76.08 | 1.65 | MultipleMeltPeaks |
| tetE         | 6B |       |       |      | NoAmplification   |
| tetG-01      | 6B | 31.23 | 81.93 | 2    | MultipleMeltPeaks |
| tetG-02      | 6B | 27.9  | 87.39 | 1.95 | MultipleMeltPeaks |
| tetH         | 6B |       |       |      | NoAmplification   |
| tetJ         | 6B |       |       |      | NoAmplification   |
| tetK         | 6B |       |       |      | NoAmplification   |
| tetL-01      | 6B | 37.6  | 80.84 | 1.74 | MultipleMeltPeaks |
| tetL-02      | 6B | 35.12 | 85.42 | 1.71 |                   |
| tetM-01      | 6B | 25.63 | 75.93 | 2.01 |                   |
| tetM-02      | 6B | 26.06 | 77.71 | 2.04 |                   |
| tetO-01      | 6B | 23.32 | 77.2  | 2.05 |                   |
| tetPA        | 6B |       |       |      | NoAmplification   |
| tetPB-01     | 6B | 38.16 | 84.36 | 1.81 | MultipleMeltPeaks |
| tetPB-02     | 6B | 28.51 | 85.23 | 2.06 |                   |
| tetPB-03     | 6B |       |       |      | NoAmplification   |
| tetPB-05     | 6B |       |       |      | NoAmplification   |
| tetQ         | 6B | 25.93 | 75.97 | 2.01 |                   |
| tetR-02      | 6B | 30.35 | 85.61 | 1.95 | MultipleMeltPeaks |
| tetR-03      | 6B |       |       |      | NoAmplification   |
| tetS         | 6B | 33.77 | 85.41 | 2.09 |                   |

|             |    |       |       |      |                   |
|-------------|----|-------|-------|------|-------------------|
| tetT        | 6B |       |       |      | NoAmplification   |
| tetU-01     | 6B |       |       |      | NoAmplification   |
| tetV        | 6B |       |       |      | NoAmplification   |
| tetW-01     | 6B | 37.22 | 83.01 | 1.82 |                   |
| tetX        | 6B |       |       |      | NoAmplification   |
| tnpA-01     | 6B |       |       |      | NoAmplification   |
| tnpA-02     | 6B | 35.02 | 84.7  | 1.69 |                   |
| tnpA-03     | 6B | 23.51 | 78.31 | 2.09 |                   |
| tnpA-04     | 6B | 36.09 | 87.43 | 1.68 |                   |
| tnpA-05     | 6B | 38.4  | 75.97 | 1.68 | MultipleMeltPeaks |
| tnpA-07     | 6B |       |       |      | NoAmplification   |
| tolC-01     | 6B | 34.05 | 81.24 | 1.87 |                   |
| tolC-02     | 6B | 28.29 | 87.21 | 2.02 |                   |
| tolC-03     | 6B | 29.69 | 86.06 | 1.95 |                   |
| Tp614       | 6B | 34.01 | 78.92 | 1.93 |                   |
| ttgA        | 6B | 34.4  | 79.3  | 1.9  |                   |
| ttgB        | 6B | 35.48 | 80.81 | 1.85 |                   |
| vanA        | 6B |       |       |      | NoAmplification   |
| vanB-01     | 6B | 33.92 | 85.18 | 1.88 |                   |
| vanC-01     | 6B | 35.58 | 76.47 | 1.95 |                   |
| vanC-02     | 6B |       |       |      | CurveFitFailed    |
| vanC-03     | 6B | 25.07 | 85.78 | 1.92 | MultipleMeltPeaks |
| vanC1       | 6B |       |       |      | NoAmplification   |
| vanC2/vanC3 | 6B | 32.12 | 77.21 | 1.95 | MultipleMeltPeaks |
| vanG        | 6B |       |       |      | NoAmplification   |
| vanHB       | 6B |       |       |      | NoAmplification   |
| vanHD       | 6B | 31.51 | 78.34 | 1.96 |                   |
| vanRA-01    | 6B |       |       |      | NoAmplification   |
| vanRA-02    | 6B |       |       |      | NoAmplification   |
| vanRB       | 6B | 33.05 | 87.55 | 2.06 |                   |
| vanRC       | 6B |       |       |      | NoAmplification   |
| vanRC4      | 6B | 38.84 | 74.39 | 1.89 |                   |
| vanRD       | 6B |       |       |      | NoAmplification   |
| vanSA       | 6B |       |       |      | NoAmplification   |
| vanSB       | 6B | 27.55 | 74.45 | 1.98 |                   |
| vanSC-01    | 6B | 32.95 | 84.37 | 1.86 |                   |
| vanSC-02    | 6B |       |       |      | NoAmplification   |
| vanTC-01    | 6B |       |       |      | NoAmplification   |
| vanTC-02    | 6B | 35.6  | 87.2  | 1.81 | MultipleMeltPeaks |
| vanTE       | 6B | 31.14 | 79.45 | 1.89 |                   |
| vanTG       | 6B |       |       |      | CurveFitFailed    |
| vanWB       | 6B |       |       |      | NoAmplification   |
| vanWG       | 6B |       |       |      | CurveFitFailed    |
| vanXA       | 6B | 37.38 | 77.25 | 1.86 |                   |
| vanXB       | 6B |       |       |      | NoAmplification   |
| vanXD       | 6B | 28.17 | 75.84 | 2.11 |                   |

|              |    |       |       |                        |
|--------------|----|-------|-------|------------------------|
| vanYB        | 6B | 32.87 | 81.69 | 1.95                   |
| vanYD-01     | 6B | 29.67 | 86.43 | 1.86 MultipleMeltPeaks |
| vanYD-02     | 6B | 37.52 | 80.3  | 1.92                   |
| vatB-01      | 6B |       |       | NoAmplification        |
| vatB-02      | 6B | 37.4  | 75.95 | 1.8 MultipleMeltPeaks  |
| vatC-01      | 6B | 39.49 | 81.24 | 1.72                   |
| vatC-02      | 6B | 34.79 | 87.56 | 1.85                   |
| vatE-01      | 6B | 28.14 | 77.09 | 2.08                   |
| vatE-02      | 6B | 37.26 | 75.3  | 2.12                   |
| vgaA-01      | 6B |       |       | NoAmplification        |
| vgaA-02      | 6B |       |       | CurveFitFailed         |
| vgb-01       | 6B | 37.68 | 87.6  | 1.85 MultipleMeltPeaks |
| vgbB-01      | 6B | 37.54 | 87.11 | 1.77 MultipleMeltPeaks |
| vgbB-02      | 6B |       |       | NoAmplification        |
| yceE/mdtG-0  | 6B | 32.54 | 81.74 | 1.82 MultipleMeltPeaks |
| yceE/mdtG-0  | 6B | 32.25 | 81.16 | 2.09                   |
| yceL/mdtH-0  | 6B | 28.35 | 86.4  | 1.96                   |
| yceL/mdtH-0  | 6B |       |       | NoAmplification        |
| yceL/mdtH-0  | 6B | 32.95 | 88.74 | 1.94 MultipleMeltPeaks |
| yidY/mdtL-01 | 6B | 29.33 | 90.6  | 2.01                   |
| yidY/mdtL-02 | 6B | 37.26 | 79.07 | 1.83                   |































| Assay           | Sample | Ct | Tm    | Efficiency | flag                                             |
|-----------------|--------|----|-------|------------|--------------------------------------------------|
| 16S rRNA        | 6C     |    | 16.3  | 82.07      | 1.94                                             |
| aac             | 6C     |    | 30.45 | 81.6       | 1.86 CtIsLarge, MultipleMeltPeaks                |
| aac(6')-Ib(akz) | 6C     |    | 33.85 | 82.77      | 1.91 CtIsLarge                                   |
| aac(6')-Ib(akz) | 6C     |    | 30.81 | 85.99      | 1.94 CtIsLarge                                   |
| aac(6')-Ib(akz) | 6C     |    | 34.16 | 88.56      | 1.94 CtIsLarge, MultipleMeltPeaks                |
| aac(6')-II      | 6C     |    | 33.2  | 78.53      | 1.91 CtIsLarge, MultipleMeltPeaks                |
| aac(6')I1       | 6C     |    | 34.32 | 88.71      | 1.82 CtIsLarge                                   |
| aacA/aphD       | 6C     |    |       |            | LowEfficiency, CtIsSmall, CtIsLarge              |
| aacC            | 6C     |    | 29.93 | 78.49      | 1.9 CtIsLarge, MultipleMeltPeaks                 |
| aacC1           | 6C     |    |       |            | BadR2, CtIsLarge, CurveFitFailed                 |
| aacC2           | 6C     |    |       |            | NoAmplification                                  |
| aacC4           | 6C     |    | 29.01 | 89.93      | 1.77 LowEfficiency, SaturationBaseline           |
| aadA-01         | 6C     |    |       |            | NoAmplification                                  |
| aadA-02         | 6C     |    |       |            | LowEfficiency, CtIsSmall, SaturationBaseline     |
| aadA-1-01       | 6C     |    |       |            | CtIsLarge, CurveFitFailed                        |
| aadA-1-02       | 6C     |    |       |            | NoAmplification                                  |
| aadA1           | 6C     |    |       |            | NoAmplification                                  |
| aadA2-01        | 6C     |    |       |            | LowEfficiency, CtIsLarge, CtIsSmall              |
| aadA2-02        | 6C     |    | 33.4  | 74.93      | 1.94 CtIsLarge, SaturationBaseline               |
| aadA2-03        | 6C     |    |       |            | CtIsLarge, CurveFitFailed                        |
| aadA5-01        | 6C     |    |       |            | CurveFitFailed                                   |
| aadA5-02        | 6C     |    |       |            | CtIsLarge, CurveFitFailed                        |
| aadA9-01        | 6C     |    | 33.39 | 91.86      | 1.86 CtIsLarge                                   |
| aadA9-02        | 6C     |    |       |            | CtIsLarge, CurveFitFailed                        |
| aadD            | 6C     |    |       |            | LowEfficiency, CtIsSmall, SaturationBaseline     |
| aadE            | 6C     |    |       |            | CtIsLarge, CurveFitFailed                        |
| acrA-01         | 6C     |    | 31.08 | 84.26      | 1.98 CtIsLarge, MultipleMeltPeaks                |
| acrA-02         | 6C     |    | 29.03 | 82.72      | 1.9                                              |
| acrA-03         | 6C     |    |       |            | LowEfficiency, CtIsLarge, CtIsSmall              |
| acrA-04         | 6C     |    | 29.81 | 80.2       | 1.98 CtIsLarge, MultipleMeltPeaks                |
| acrA-05         | 6C     |    | 28.93 | 88.74      | 1.96                                             |
| acrB-01         | 6C     |    | 34.94 | 76.4       | 1.99 CtIsLarge                                   |
| acrF            | 6C     |    | 32.3  | 81.91      | 1.78 LowEfficiency, CtIsLarge                    |
| acrR-01         | 6C     |    | 32.14 | 90.59      | 1.96 CtIsLarge                                   |
| acrR-02         | 6C     |    | 33.43 | 86.04      | 1.94 CtIsLarge, MultipleMeltPeaks                |
| Actin           | 6C     |    | 22.68 | 86.83      | 1.94 MultipleMeltPeaks                           |
| adeA            | 6C     |    |       |            | LowEfficiency, CtIsLarge, CtIsSmall              |
| ampC-01         | 6C     |    | 30.62 | 85.03      | 1.93 CtIsLarge                                   |
| ampC-02         | 6C     |    |       |            | CtIsLarge, CurveFitFailed                        |
| ampC-04         | 6C     |    | 33.9  | 77.79      | 1.65 LowEfficiency, CtIsLarge, MultipleMeltPeaks |
| ampC-05         | 6C     |    |       |            | NoAmplification                                  |
| ampC-06         | 6C     |    |       |            | NoAmplification                                  |
| ampC-07         | 6C     |    |       |            | LowEfficiency, CtIsLarge, CtIsSmall              |
| ampC-09         | 6C     |    |       |            | BadR2, LowEfficiency, CtIsSmall                  |
| ampC/blaDH      | 6C     |    | 30.95 | 86.09      | 1.97 CtIsLarge, MultipleMeltPeaks                |

|               |    |       |       |      |                              |
|---------------|----|-------|-------|------|------------------------------|
| aph           | 6C |       |       |      | LowEfficiency, CtIsSmall, Ci |
| aph(2')-Id-01 | 6C |       |       |      | LowEfficiency, CtIsSmall, S: |
| aph(2')-Id-02 | 6C |       |       |      | LowEfficiency, CtIsSmall, S: |
| aph6ia        | 6C |       |       |      | CtIsLarge, CurveFitFailed    |
| aphA1(aka k:  | 6C |       |       |      | CurveFitFailed               |
| bacA-01       | 6C |       |       |      | LowEfficiency, CtIsSmall, S: |
| bacA-02       | 6C |       |       |      | LowEfficiency, CtIsLarge, Ci |
| BETA-globin   | 6C | 23.1  | 83.96 | 2    |                              |
| bla-ACC-1     | 6C |       |       |      | NoAmplification              |
| bla-L1        | 6C | 30.47 | 85.98 | 1.96 | CtIsLarge                    |
| bla1          | 6C |       |       |      | LowEfficiency, CtIsSmall, Ci |
| blaCMY        | 6C |       |       |      | NoAmplification              |
| blaCMY2-01    | 6C |       |       |      | NoAmplification              |
| blaCMY2-02    | 6C | 31.41 | 81.96 | 1.89 | CtIsLarge, MultipleMeltPe:   |
| blaCTX-M-01   | 6C | 32.71 | 86.65 | 1.96 | CtIsLarge                    |
| blaCTX-M-02   | 6C |       |       |      | LowEfficiency, CtIsLarge, Ci |
| blaCTX-M-03   | 6C |       |       |      | LowEfficiency, CtIsSmall, S: |
| blaCTX-M-04   | 6C | 33.98 | 86.22 | 1.98 | CtIsLarge                    |
| blaCTX-M-05   | 6C |       |       |      | NoAmplification              |
| blaCTX-M-06   | 6C |       |       |      | CurveFitFailed               |
| blaGES        | 6C |       |       |      | NoAmplification              |
| blaIMP-01     | 6C |       |       |      | NoAmplification              |
| blaIMP-02     | 6C |       |       |      | LowEfficiency, CtIsSmall, Ci |
| blaMOX/blaC   | 6C |       |       |      | NoAmplification              |
| blaOCH        | 6C |       |       |      | NoAmplification              |
| blaOKP        | 6C |       |       |      | NoAmplification              |
| blaOXA1/blaC  | 6C |       |       |      | LowEfficiency, CtIsSmall, Ci |
| blaOXA10-01   | 6C |       |       |      | LowEfficiency, CtIsSmall, S: |
| blaOXA10-02   | 6C |       |       |      | CurveFitFailed               |
| blaOXY        | 6C | 31.7  | 89.38 | 1.81 | CtIsLarge                    |
| blaPAO        | 6C |       |       |      | NoAmplification              |
| blaPER        | 6C | 33.71 | 79.12 | 2    | CtIsLarge                    |
| blaPSE        | 6C |       |       |      | NoAmplification              |
| blaROB        | 6C |       |       |      | NoAmplification              |
| blaSFO        | 6C | 32.61 | 87.26 | 1.93 | CtIsLarge                    |
| blaSHV-01     | 6C |       |       |      | LowEfficiency, CtIsSmall, S: |
| blaSHV-02     | 6C |       |       |      | LowEfficiency, CtIsSmall, Ci |
| blaTEM        | 6C | 20.96 | 79.17 | 1.71 | LowEfficiency                |
| blaTLA        | 6C |       |       |      | LowEfficiency, CtIsSmall, S: |
| blaVEB        | 6C |       |       |      | NoAmplification              |
| blaVIM        | 6C |       |       |      | NoAmplification              |
| blaZ          | 6C |       |       |      | NoAmplification              |
| carB          | 6C |       |       |      | CtIsLarge, CurveFitFailed    |
| catA1         | 6C |       |       |      | NoAmplification              |
| catB3         | 6C | 33.32 | 80.13 | 1.98 | CtIsLarge, MultipleMeltPe:   |
| catB8         | 6C | 28.46 | 82.06 | 1.99 |                              |

|            |    |       |       |      |                             |
|------------|----|-------|-------|------|-----------------------------|
| ceoA       | 6C | 28.92 | 87.65 | 1.96 |                             |
| cepA       | 6C |       |       |      | NoAmplification             |
| cfiA       | 6C |       |       |      | NoAmplification             |
| cfr        | 6C |       |       |      | LowEfficiency, CtIsSmall, S |
| cfxA       | 6C | 25.13 | 77.2  | 1.89 |                             |
| cmeA       | 6C |       |       |      | CurveFitFailed              |
| cmlA1-01   | 6C | 33.53 | 89.46 | 1.93 | CtIsLarge                   |
| cmlA1-02   | 6C | 33.03 | 89.26 | 1.9  | CtIsLarge                   |
| cmr        | 6C |       |       |      | BadR2, LowEfficiency, CtIsS |
| cmx(A)     | 6C | 29.03 | 84.47 | 1.98 |                             |
| cphA-01    | 6C | 30.53 | 85.61 | 1.75 | LowEfficiency, CtIsLarge    |
| cphA-02    | 6C |       |       |      | CurveFitFailed              |
| dfrA1      | 6C |       |       |      | CtIsLarge, CurveFitFailed   |
| dfrA12     | 6C | 32.69 | 78.44 | 1.94 | CtIsLarge                   |
| emrD       | 6C | 31    | 90.43 | 1.89 | CtIsLarge                   |
| ereA       | 6C |       |       |      | CtIsLarge, CurveFitFailed   |
| ereB       | 6C | 34.61 | 82.85 | 1.91 | CtIsLarge, MultipleMeltPe   |
| erm(34)    | 6C |       |       |      | LowEfficiency, CtIsLarge, C |
| erm(35)    | 6C |       |       |      | LowEfficiency, CtIsSmall, S |
| erm(36)    | 6C | 33.34 | 85.91 | 2.05 | CtIsLarge                   |
| ermA       | 6C |       |       |      | LowEfficiency, CtIsSmall, C |
| ermA/ermTR | 6C |       |       |      | NoAmplification             |
| ermB       | 6C | 28.37 | 74.9  | 2.12 |                             |
| ermC       | 6C |       |       |      | LowEfficiency, CtIsSmall, S |
| ermF       | 6C |       |       |      | LowEfficiency, CtIsSmall, S |
| ermJ/ermD  | 6C |       |       |      | NoAmplification             |
| ermK-01    | 6C |       |       |      | CurveFitFailed              |
| ermK-02    | 6C |       |       |      | LowEfficiency, CtIsLarge, C |
| ermT-01    | 6C |       |       |      | NoAmplification             |
| ermT-02    | 6C |       |       |      | BadR2, LowEfficiency, CtIsS |
| ermX       | 6C |       |       |      | LowEfficiency, CtIsLarge, C |
| ermY       | 6C |       |       |      | LowEfficiency, CtIsSmall, C |
| fabK       | 6C | 26.62 | 79.03 | 2.08 |                             |
| floR       | 6C |       |       |      | LowEfficiency, CtIsLarge, C |
| folA       | 6C |       |       |      | NoAmplification             |
| fosB       | 6C |       |       |      | LowEfficiency, CtIsSmall, S |
| fosX       | 6C |       |       |      | NoAmplification             |
| fox5       | 6C | 28.35 | 86.07 | 1.86 |                             |
| imiR       | 6C |       |       |      | NoAmplification             |
| ImrA-01    | 6C |       |       |      | BadR2, LowEfficiency, CtIsS |
| intl       | 6C | 28.36 | 87.2  | 1.87 | MultipleMeltPeaks           |
| intl1      | 6C | 20.73 | 87.36 | 2    |                             |
| IS613      | 6C | 28.12 | 80.74 | 1.75 | LowEfficiency               |
| lnuA-01    | 6C |       |       |      | LowEfficiency, CtIsSmall, S |
| lnuB-01    | 6C |       |       |      | LowEfficiency, CtIsSmall, C |
| lnuB-02    | 6C |       |       |      | LowEfficiency, CtIsLarge, C |

|              |    |       |       |      |                             |
|--------------|----|-------|-------|------|-----------------------------|
| lnuC         | 6C | 34.9  | 87.29 | 1.77 | LowEfficiency, CtIsLarge    |
| marR-01      | 6C | 31.15 | 89.26 | 1.93 | CtIsLarge                   |
| matA/mel     | 6C | 19.84 | 77.69 | 2.07 |                             |
| mdet1        | 6C |       |       |      | NoAmplification             |
| mdtA         | 6C |       |       |      | LowEfficiency, CtIsLarge, C |
| mdtE/yhiU    | 6C |       |       |      | CtIsLarge, CurveFitFailed   |
| mecA         | 6C |       |       |      | LowEfficiency, CtIsSmall, S |
| mefA         | 6C | 18.77 | 80.32 | 1.95 | MultipleMeltPeaks           |
| mepA         | 6C | 32.34 | 90.72 | 1.82 | CtIsLarge, MultipleMeltPe   |
| mexA         | 6C |       |       |      | LowEfficiency, CtIsLarge, C |
| mexD         | 6C |       |       |      | CtIsLarge, CurveFitFailed   |
| mexE         | 6C |       |       |      | LowEfficiency, CtIsLarge, C |
| mexF         | 6C | 27.07 | 87.48 | 2.01 |                             |
| mphA-01      | 6C | 30.4  | 90.07 | 1.95 | CtIsLarge                   |
| mphA-02      | 6C | 28.34 | 89.85 | 1.93 |                             |
| mphB         | 6C |       |       |      | CurveFitFailed              |
| mphC         | 6C |       |       |      | CurveFitFailed              |
| msrA-01      | 6C |       |       |      | LowEfficiency, CtIsSmall, C |
| msrC-01      | 6C |       |       |      | NoAmplification             |
| mtrC-01      | 6C |       |       |      | LowEfficiency, CtIsLarge, C |
| mtrC-02      | 6C | 30.59 | 84.24 | 1.98 | CtIsLarge                   |
| mtrD-02      | 6C | 28.93 | 81.09 | 1.97 |                             |
| mtrD-03      | 6C |       |       |      | LowEfficiency, CtIsLarge, C |
| NDM1         | 6C |       |       |      | NoAmplification             |
| nimE         | 6C |       |       |      | LowEfficiency, CtIsSmall, C |
| nisB         | 6C | 29.91 | 76.51 | 1.98 | CtIsLarge                   |
| oleC         | 6C |       |       |      | CtIsLarge, CurveFitFailed   |
| oprD         | 6C | 28.65 | 91.89 | 1.92 |                             |
| oprJ         | 6C | 29.83 | 91.28 | 1.89 | CtIsLarge                   |
| pbp          | 6C |       |       |      | LowEfficiency, CtIsSmall, S |
| pbp2x        | 6C |       |       |      | NoAmplification             |
| Pbp5         | 6C |       |       |      | CurveFitFailed              |
| penA         | 6C |       |       |      | LowEfficiency, CtIsLarge, C |
| pikR1        | 6C | 34.26 | 88.99 | 1.69 | LowEfficiency, CtIsLarge    |
| pikR2        | 6C | 32.03 | 84.29 | 1.98 | CtIsLarge                   |
| pmrA         | 6C | 24.02 | 78.25 | 2.06 |                             |
| pncA         | 6C | 30.88 | 91.01 | 1.89 | CtIsLarge, MultipleMeltPe   |
| putative mul | 6C |       |       |      | NoAmplification             |
| qac          | 6C |       |       |      | CtIsLarge, CurveFitFailed   |
| qacA         | 6C | 34.38 | 70.18 | 1.69 | LowEfficiency, CtIsLarge    |
| qacA/qacB    | 6C |       |       |      | NoAmplification             |
| qacEdelta1-0 | 6C |       |       |      | NoAmplification             |
| qacEdelta1-0 | 6C | 32.39 | 84.08 | 1.94 | CtIsLarge                   |
| qacH-01      | 6C | 34.87 | 80    | 1.85 | CtIsLarge, MultipleMeltPe   |
| qacH-02      | 6C |       |       |      | LowEfficiency, CtIsLarge, C |
| qnrA         | 6C |       |       |      | LowEfficiency, CtIsLarge, C |



|              |    |       |       |      |                             |
|--------------|----|-------|-------|------|-----------------------------|
| rarD-02      | 6C |       |       |      | LowEfficiency, CtIsLarge, C |
| sat4         | 6C |       |       |      | CurveFitFailed              |
| sdeB         | 6C |       |       |      | CurveFitFailed              |
| spcN-01      | 6C |       |       |      | NoAmplification             |
| speA         | 6C |       |       |      | NoAmplification             |
| str          | 6C |       |       |      | NoAmplification             |
| strA         | 6C |       |       |      | LowEfficiency, CtIsSmall, C |
| strB         | 6C |       |       |      | BadR2, LowEfficiency, CtIsS |
| sul1         | 6C |       |       |      | CtIsLarge, SaturationBaseli |
| sul2         | 6C |       |       |      | CurveFitFailed              |
| sulA/foIP-01 | 6C | 20.52 | 80.84 | 2.02 |                             |
| sulA/foIP-03 | 6C | 20.96 | 83.29 | 2.01 |                             |
| tet(32)      | 6C | 30.5  | 87.19 | 1.81 | CtIsLarge, MultipleMeltPe   |
| tet(34)      | 6C | 33.16 | 75.08 | 1.81 | CtIsLarge                   |
| tet(35)      | 6C | 29.16 | 76.95 | 1.88 |                             |
| tet(36)-A    | 6C |       |       |      | BadR2, LowEfficiency, CtIsS |
| tet(36)-B    | 6C |       |       |      | LowEfficiency, CtIsLarge, C |
| tet(37)      | 6C | 27.8  | 82.62 | 2    | MultipleMeltPeaks           |
| tetA-01      | 6C | 26.96 | 75.62 | 2.01 | MultipleMeltPeaks           |
| tetA-02      | 6C | 32.26 | 87.96 | 1.85 | CtIsLarge                   |
| tetB-01      | 6C | 33.04 | 87.93 | 1.95 | CtIsLarge                   |
| tetB-02      | 6C |       |       |      | LowEfficiency, CtIsLarge, C |
| tetC-01      | 6C |       |       |      | NoAmplification             |
| tetC-02      | 6C |       |       |      | CtIsLarge, CurveFitFailed   |
| tetD-01      | 6C |       |       |      | CurveFitFailed              |
| tetD-02      | 6C |       |       |      | LowEfficiency, CtIsLarge, C |
| tetE         | 6C |       |       |      | NoAmplification             |
| tetG-01      | 6C |       |       |      | LowEfficiency, CtIsSmall, S |
| tetG-02      | 6C |       |       |      | LowEfficiency, CtIsSmall, S |
| tetH         | 6C |       |       |      | LowEfficiency, CtIsSmall, S |
| tetJ         | 6C |       |       |      | LowEfficiency, CtIsSmall, S |
| tetK         | 6C |       |       |      | CurveFitFailed              |
| tetL-01      | 6C |       |       |      | LowEfficiency, CtIsSmall, S |
| tetL-02      | 6C |       |       |      | LowEfficiency, CtIsSmall, S |
| tetM-01      | 6C |       |       |      | CurveFitFailed              |
| tetM-02      | 6C |       |       |      | NoAmplification             |
| tetO-01      | 6C | 23.27 | 76.64 | 2.07 |                             |
| tetPA        | 6C |       |       |      | NoAmplification             |
| tetPB-01     | 6C |       |       |      | LowEfficiency, CtIsLarge, C |
| tetPB-02     | 6C | 28.81 | 84.78 | 2.08 |                             |
| tetPB-03     | 6C |       |       |      | LowEfficiency, CtIsSmall, S |
| tetPB-05     | 6C |       |       |      | LowEfficiency, CtIsSmall, S |
| tetQ         | 6C | 24.5  | 76.3  | 2.01 |                             |
| tetR-02      | 6C | 29.34 | 90.3  | 2    |                             |
| tetR-03      | 6C |       |       |      | CurveFitFailed              |
| tetS         | 6C | 31.44 | 87.44 | 2.13 | CtIsLarge                   |

|             |    |       |       |      |                                          |
|-------------|----|-------|-------|------|------------------------------------------|
| tetT        | 6C |       |       |      | CurveFitFailed                           |
| tetU-01     | 6C |       |       |      | NoAmplification                          |
| tetV        | 6C |       |       |      | NoAmplification                          |
| tetW-01     | 6C |       |       |      | CurveFitFailed                           |
| tetX        | 6C |       |       |      | CurveFitFailed                           |
| tnpA-01     | 6C |       |       |      | LowEfficiency, CtIsSmall, S <sub>e</sub> |
| tnpA-02     | 6C |       |       |      | LowEfficiency, CtIsLarge, C <sub>t</sub> |
| tnpA-03     | 6C | 23.51 | 77.93 | 2.08 |                                          |
| tnpA-04     | 6C |       |       |      | CtIsLarge, CurveFitFailed                |
| tnpA-05     | 6C | 32.01 | 80.45 | 1.91 | CtIsLarge                                |
| tnpA-07     | 6C |       |       |      | NoAmplification                          |
| tolC-01     | 6C |       |       |      | BadR2, LowEfficiency, CtIsS              |
| tolC-02     | 6C | 31.07 | 84.53 | 2    | CtIsLarge, MultipleMeltPea               |
| tolC-03     | 6C | 29.72 | 87.58 | 2    | CtIsLarge                                |
| Tp614       | 6C |       |       |      | CtIsLarge, CurveFitFailed                |
| ttgA        | 6C | 33.01 | 84.34 | 1.87 | CtIsLarge                                |
| ttgB        | 6C | 34.47 | 80.03 | 1.91 | CtIsLarge, MultipleMeltPea               |
| vanA        | 6C |       |       |      | NoAmplification                          |
| vanB-01     | 6C | 32.73 | 82.91 | 1.81 | CtIsLarge, MultipleMeltPea               |
| vanC-01     | 6C |       |       |      | CurveFitFailed                           |
| vanC-02     | 6C |       |       |      | CurveFitFailed                           |
| vanC-03     | 6C | 26.79 | 85.5  | 1.95 | MultipleMeltPeaks                        |
| vanC1       | 6C |       |       |      | LowEfficiency, CtIsSmall, S <sub>e</sub> |
| vanC2/vanC3 | 6C | 32.56 | 82.67 | 1.98 | CtIsLarge                                |
| vanG        | 6C |       |       |      | LowEfficiency, CtIsSmall, S <sub>e</sub> |
| vanHB       | 6C |       |       |      | LowEfficiency, CtIsLarge, C <sub>t</sub> |
| vanHD       | 6C | 33.97 | 81.33 | 1.85 | CtIsLarge, MultipleMeltPea               |
| vanRA-01    | 6C |       |       |      | NoAmplification                          |
| vanRA-02    | 6C |       |       |      | NoAmplification                          |
| vanRB       | 6C | 34.4  | 87.28 | 1.96 | CtIsLarge                                |
| vanRC       | 6C |       |       |      | LowEfficiency, CtIsSmall, C <sub>t</sub> |
| vanRC4      | 6C |       |       |      | LowEfficiency, CtIsSmall, S <sub>e</sub> |
| vanRD       | 6C |       |       |      | NoAmplification                          |
| vanSA       | 6C |       |       |      | NoAmplification                          |
| vanSB       | 6C | 27.16 | 74.39 | 2.07 |                                          |
| vanSC-01    | 6C |       |       |      | CtIsLarge, CurveFitFailed                |
| vanSC-02    | 6C |       |       |      | NoAmplification                          |
| vanTC-01    | 6C |       |       |      | LowEfficiency, CtIsSmall, S <sub>e</sub> |
| vanTC-02    | 6C |       |       |      | LowEfficiency, CtIsLarge, C <sub>t</sub> |
| vanTE       | 6C |       |       |      | CurveFitFailed                           |
| vanTG       | 6C |       |       |      | NoAmplification                          |
| vanWB       | 6C |       |       |      | LowEfficiency, CtIsSmall, S <sub>e</sub> |
| vanWG       | 6C |       |       |      | CurveFitFailed                           |
| vanXA       | 6C |       |       |      | NoAmplification                          |
| vanXB       | 6C |       |       |      | NoAmplification                          |
| vanXD       | 6C | 29.54 | 75.18 | 2.05 | CtIsLarge                                |

|              |    |       |       |      |                              |
|--------------|----|-------|-------|------|------------------------------|
| vanYB        | 6C |       |       |      | CtIsLarge, CurveFitFailed    |
| vanYD-01     | 6C | 33.66 | 81.16 | 1.8  | LowEfficiency, CtIsLarge     |
| vanYD-02     | 6C |       |       |      | LowEfficiency, CtIsSmall, Ci |
| vatB-01      | 6C |       |       |      | LowEfficiency, CtIsSmall, Ci |
| vatB-02      | 6C |       |       |      | CtIsLarge, CurveFitFailed    |
| vatC-01      | 6C |       |       |      | CtIsLarge, CurveFitFailed    |
| vatC-02      | 6C |       |       |      | LowEfficiency, CtIsLarge, Ci |
| vatE-01      | 6C | 28.59 | 76.21 | 2.08 |                              |
| vatE-02      | 6C |       |       |      | NoAmplification              |
| vgaA-01      | 6C |       |       |      | LowEfficiency, CtIsSmall, S: |
| vgaA-02      | 6C |       |       |      | LowEfficiency, CtIsSmall, S: |
| vgb-01       | 6C |       |       |      | CtIsLarge, CurveFitFailed    |
| vgbB-01      | 6C |       |       |      | CurveFitFailed               |
| vgbB-02      | 6C |       |       |      | CurveFitFailed               |
| yceE/mdtG-0  | 6C |       |       |      | LowEfficiency, CtIsSmall, Ci |
| yceE/mdtG-0  | 6C |       |       |      | NoAmplification              |
| yceL/mdtH-0  | 6C | 31.47 | 75.61 | 1.75 | LowEfficiency, CtIsLarge, M  |
| yceL/mdtH-0  | 6C |       |       |      | NoAmplification              |
| yceL/mdtH-0  | 6C | 34.64 | 81.03 | 1.84 | CtIsLarge, MultipleMeltPe:   |
| yidY/mdtL-01 | 6C | 32.7  | 83.26 | 1.97 | CtIsLarge, MultipleMeltPe:   |
| yidY/mdtL-02 | 6C |       |       |      | LowEfficiency, CtIsSmall, Ci |































| Assay          | Sample | Ct | Tm    | Efficiency | flag                         |
|----------------|--------|----|-------|------------|------------------------------|
| 16S rRNA       | 7A     |    | 16.91 | 82.21      | 2                            |
| aac            | 7A     |    | 31.52 | 88.84      | 1.94                         |
| aac(6')-Ib(akε | 7A     |    |       |            | BadR2, LowEfficiency, CtIsS  |
| aac(6')-Ib(akε | 7A     |    | 32.78 | 87.5       | 1.95 MultipleMeltPeaks       |
| aac(6')-Ib(akε | 7A     |    | 38.05 | 84         | 1.7 MultipleMeltPeaks        |
| aac(6')-II     | 7A     |    | 35.44 | 80.51      | 1.77 MultipleMeltPeaks       |
| aac(6')I1      | 7A     |    | 34.6  | 90.09      | 1.81                         |
| aacA/aphD      | 7A     |    |       |            | LowEfficiency, CtIsSmall, Ci |
| aacC           | 7A     |    | 41.28 | 62.74      | 1.66 MultipleMeltPeaks       |
| aacC1          | 7A     |    |       |            | CurveFitFailed               |
| aacC2          | 7A     |    |       |            | NoAmplification              |
| aacC4          | 7A     |    | 34.64 | 87.73      | 1.79 MultipleMeltPeaks       |
| aadA-01        | 7A     |    |       |            | LowEfficiency, CtIsSmall, S  |
| aadA-02        | 7A     |    | 40.08 | 80.67      | 1.77 MultipleMeltPeaks       |
| aadA-1-01      | 7A     |    | 35.94 | 74.82      | 1.93 MultipleMeltPeaks       |
| aadA-1-02      | 7A     |    |       |            | CurveFitFailed               |
| aadA1          | 7A     |    | 34.32 | 84.14      | 1.9 MultipleMeltPeaks        |
| aadA2-01       | 7A     |    | 35.16 | 89.54      | 1.88 MultipleMeltPeaks       |
| aadA2-02       | 7A     |    | 32.27 | 75.47      | 1.95                         |
| aadA2-03       | 7A     |    | 38.67 | 90.31      | 1.68 MultipleMeltPeaks       |
| aadA5-01       | 7A     |    | 38.23 | 65.09      | 1.85 MultipleMeltPeaks       |
| aadA5-02       | 7A     |    | 36.82 | 83.77      | 1.83 MultipleMeltPeaks       |
| aadA9-01       | 7A     |    | 37.79 | 82.04      | 1.85 MultipleMeltPeaks       |
| aadA9-02       | 7A     |    | 37.19 | 80.18      | 2.36 MultipleMeltPeaks       |
| aadD           | 7A     |    |       |            | NoAmplification              |
| aadE           | 7A     |    |       |            | NoAmplification              |
| acrA-01        | 7A     |    | 31.9  | 89.18      | 1.93                         |
| acrA-02        | 7A     |    | 34.62 | 88.76      | 1.83                         |
| acrA-03        | 7A     |    |       |            | CurveFitFailed               |
| acrA-04        | 7A     |    | 30.79 | 80.76      | 1.94                         |
| acrA-05        | 7A     |    | 30.05 | 88.53      | 1.95                         |
| acrB-01        | 7A     |    | 34.86 | 88.38      | 1.93                         |
| acrF           | 7A     |    | 28.39 | 82.84      | 1.83                         |
| acrR-01        | 7A     |    | 32.69 | 89.16      | 1.94 MultipleMeltPeaks       |
| acrR-02        | 7A     |    | 32.43 | 86.34      | 1.95                         |
| Actin          | 7A     |    | 21.81 | 87.02      | 1.97                         |
| adeA           | 7A     |    |       |            | NoAmplification              |
| ampC-01        | 7A     |    | 32.11 | 89.68      | 2.01                         |
| ampC-02        | 7A     |    | 38.18 | 61.95      | 1.83 MultipleMeltPeaks       |
| ampC-04        | 7A     |    | 33.7  | 78.22      | 1.91                         |
| ampC-05        | 7A     |    |       |            | NoAmplification              |
| ampC-06        | 7A     |    | 38.94 | 84.39      | 1.82 MultipleMeltPeaks       |
| ampC-07        | 7A     |    | 35.36 | 86.52      | 1.8 MultipleMeltPeaks        |
| ampC-09        | 7A     |    | 37.58 | 90.27      | 1.69                         |
| ampC/blaDH     | 7A     |    | 31.19 | 84.62      | 1.97 MultipleMeltPeaks       |

|               |    |       |       |      |                              |
|---------------|----|-------|-------|------|------------------------------|
| aph           | 7A | 34.41 | 73.17 | 2.1  |                              |
| aph(2')-Id-01 | 7A |       |       |      | CurveFitFailed               |
| aph(2')-Id-02 | 7A |       |       |      | LowEfficiency, CtIsSmall, S: |
| aph6ia        | 7A |       |       |      | NoAmplification              |
| aphA1(aka ke  | 7A |       |       |      | CurveFitFailed               |
| bacA-01       | 7A | 38.95 | 88.6  | 1.71 |                              |
| bacA-02       | 7A |       |       |      | CurveFitFailed               |
| BETA-globin   | 7A | 24.35 | 84.33 | 1.98 |                              |
| bla-ACC-1     | 7A | 35.86 | 86.56 | 1.81 | MultipleMeltPeaks            |
| bla-L1        | 7A | 29.86 | 85.24 | 1.94 |                              |
| bla1          | 7A |       |       |      | LowEfficiency, CtIsSmall, C: |
| blaCMY        | 7A | 34.39 | 80.85 | 1.94 | MultipleMeltPeaks            |
| blaCMY2-01    | 7A | 27.6  | 83.32 | 2.07 |                              |
| blaCMY2-02    | 7A | 30.6  | 82.15 | 1.92 | MultipleMeltPeaks            |
| blaCTX-M-01   | 7A | 37.11 | 90.9  | 1.84 |                              |
| blaCTX-M-02   | 7A | 33.33 | 89.48 | 1.93 |                              |
| blaCTX-M-03   | 7A | 43.23 | 80.78 | 1.71 |                              |
| blaCTX-M-04   | 7A | 32.42 | 91.34 | 1.85 |                              |
| blaCTX-M-05   | 7A | 37.03 | 75.65 | 1.87 |                              |
| blaCTX-M-06   | 7A |       |       |      | NoAmplification              |
| blaGES        | 7A |       |       |      | NoAmplification              |
| blaIMP-01     | 7A |       |       |      | NoAmplification              |
| blaIMP-02     | 7A | 32.09 | 80.41 | 1.98 | MultipleMeltPeaks            |
| blaMOX/blaC   | 7A |       |       |      | NoAmplification              |
| blaOCH        | 7A |       |       |      | NoAmplification              |
| blaOKP        | 7A |       |       |      | NoAmplification              |
| blaOXA1/blaC  | 7A |       |       |      | LowEfficiency, CtIsSmall, S: |
| blaOXA10-01   | 7A |       |       |      | CurveFitFailed               |
| blaOXA10-02   | 7A |       |       |      | CurveFitFailed               |
| blaOXY        | 7A | 30.39 | 91.42 | 1.86 |                              |
| blaPAO        | 7A |       |       |      | NoAmplification              |
| blaPER        | 7A | 35.84 | 70.23 | 1.66 |                              |
| blaPSE        | 7A | 38.19 | 78.4  | 1.71 | MultipleMeltPeaks            |
| blaROB        | 7A | 33.72 | 87.7  | 1.94 |                              |
| blaSFO        | 7A | 31.76 | 81.49 | 1.94 | MultipleMeltPeaks            |
| blaSHV-01     | 7A | 31.98 | 89.52 | 2    |                              |
| blaSHV-02     | 7A | 37.16 | 83.86 | 1.9  | MultipleMeltPeaks            |
| blaTEM        | 7A |       |       |      | NoAmplification              |
| blaTLA        | 7A |       |       |      | NoAmplification              |
| blaVEB        | 7A |       |       |      | NoAmplification              |
| blaVIM        | 7A | 38.08 | 90.4  | 1.79 |                              |
| blaZ          | 7A |       |       |      | LowEfficiency, CtIsSmall, S: |
| carB          | 7A | 34.98 | 89.58 | 1.88 |                              |
| catA1         | 7A |       |       |      | NoAmplification              |
| catB3         | 7A | 37.25 | 78.75 | 1.77 | MultipleMeltPeaks            |
| catB8         | 7A | 28.5  | 82.92 | 1.97 |                              |

|            |    |       |       |      |                              |
|------------|----|-------|-------|------|------------------------------|
| ceoA       | 7A | 26.84 | 82.17 | 1.93 | MultipleMeltPeaks            |
| cepA       | 7A |       |       |      | NoAmplification              |
| cfiA       | 7A | 30.55 | 87.35 | 1.8  |                              |
| cfr        | 7A |       |       |      | LowEfficiency, CtIsSmall, S: |
| cfxA       | 7A | 29.07 | 77.58 | 2    |                              |
| cmeA       | 7A | 37.38 | 81.61 | 1.84 | MultipleMeltPeaks            |
| cmlA1-01   | 7A | 33.75 | 87.47 | 1.93 |                              |
| cmlA1-02   | 7A | 37.39 | 87.79 | 1.78 | MultipleMeltPeaks            |
| cmr        | 7A | 35.53 | 72.78 | 2    |                              |
| cmx(A)     | 7A | 28.05 | 84.43 | 1.98 | MultipleMeltPeaks            |
| cphA-01    | 7A | 32.98 | 88.31 | 1.94 | MultipleMeltPeaks            |
| cphA-02    | 7A | 37.93 | 89.62 | 1.81 | MultipleMeltPeaks            |
| dfrA1      | 7A | 30.91 | 86.25 | 1.93 |                              |
| dfrA12     | 7A | 37.01 | 75.47 | 1.77 | MultipleMeltPeaks            |
| emrD       | 7A | 31.96 | 80.71 | 1.91 |                              |
| ereA       | 7A |       |       |      | CurveFitFailed               |
| ereB       | 7A | 35.01 | 79.53 | 1.9  |                              |
| erm(34)    | 7A |       |       |      | CurveFitFailed               |
| erm(35)    | 7A |       |       |      | NoAmplification              |
| erm(36)    | 7A | 33.37 | 87.27 | 2.14 |                              |
| ermA       | 7A |       |       |      | CurveFitFailed               |
| ermA/ermTR | 7A |       |       |      | NoAmplification              |
| ermB       | 7A |       |       |      | LowEfficiency, CtIsSmall, S: |
| ermC       | 7A |       |       |      | CurveFitFailed               |
| ermF       | 7A |       |       |      | LowEfficiency, CtIsSmall, S: |
| ermJ/ermD  | 7A |       |       |      | CurveFitFailed               |
| ermK-01    | 7A | 38.57 | 73.7  | 1.88 |                              |
| ermK-02    | 7A | 33.99 | 87.65 | 1.9  |                              |
| ermT-01    | 7A |       |       |      | NoAmplification              |
| ermT-02    | 7A | 38.01 | 80.72 | 1.97 |                              |
| ermX       | 7A | 33.78 | 85.82 | 1.87 | MultipleMeltPeaks            |
| ermY       | 7A |       |       |      | NoAmplification              |
| fabK       | 7A | 21.45 | 79.15 | 2.17 |                              |
| floR       | 7A | 37.09 | 91.21 | 1.84 |                              |
| folA       | 7A |       |       |      | NoAmplification              |
| fosB       | 7A |       |       |      | LowEfficiency, CtIsSmall, S: |
| fosX       | 7A |       |       |      | NoAmplification              |
| fox5       | 7A | 27.94 | 86.58 | 2    |                              |
| imiR       | 7A |       |       |      | NoAmplification              |
| ImrA-01    | 7A | 37.58 | 83.48 | 1.87 | MultipleMeltPeaks            |
| intl       | 7A | 28.85 | 90.91 | 1.96 | MultipleMeltPeaks            |
| intl1      | 7A | 21.14 | 87.18 | 2    |                              |
| IS613      | 7A | 26.48 | 79.63 | 2.09 |                              |
| lnuA-01    | 7A |       |       |      | CurveFitFailed               |
| lnuB-01    | 7A |       |       |      | NoAmplification              |
| lnuB-02    | 7A | 39.2  | 84.7  | 1.6  |                              |

|                |    |       |       |                              |
|----------------|----|-------|-------|------------------------------|
| lnuC           | 7A | 32.86 | 86.68 | 1.87                         |
| marR-01        | 7A | 30.8  | 85.52 | 1.95                         |
| matA/mel       | 7A | 19.79 | 77.73 | 2.07                         |
| mdet1          | 7A |       |       | NoAmplification              |
| mdtA           | 7A | 34.85 | 82.38 | 1.77 MultipleMeltPeaks       |
| mdtE/yhiU      | 7A | 31.37 | 85.06 | 1.84 MultipleMeltPeaks       |
| mecA           | 7A |       |       | LowEfficiency, CtIsSmall, S: |
| mefA           | 7A | 19.12 | 80.47 | 1.98                         |
| mepA           | 7A | 29.96 | 88.25 | 2                            |
| mexA           | 7A | 33.01 | 84.85 | 1.9                          |
| mexD           | 7A | 32.8  | 80.36 | 2.06                         |
| mexE           | 7A | 35.49 | 91.13 | 1.85 MultipleMeltPeaks       |
| mexF           | 7A | 29.08 | 84.25 | 2.06 MultipleMeltPeaks       |
| mphA-01        | 7A | 29.65 | 88.76 | 1.93                         |
| mphA-02        | 7A | 26.61 | 78.59 | 1.88                         |
| mphB           | 7A |       |       | CurveFitFailed               |
| mphC           | 7A | 36.78 | 82.79 | 1.73 MultipleMeltPeaks       |
| msrA-01        | 7A | 31.55 | 73.66 | 2.09                         |
| msrC-01        | 7A |       |       | NoAmplification              |
| mtrC-01        | 7A | 37.5  | 83.8  | 1.81                         |
| mtrC-02        | 7A | 31.54 | 85.06 | 1.94                         |
| mtrD-02        | 7A | 28.15 | 81.44 | 1.94                         |
| mtrD-03        | 7A | 35.61 | 85.43 | 1.86                         |
| NDM1           | 7A |       |       | LowEfficiency, CtIsSmall, S: |
| nimE           | 7A | 30.2  | 85.08 | 1.92 MultipleMeltPeaks       |
| nisB           | 7A | 36.55 | 86.42 | 1.77                         |
| oleC           | 7A | 31.16 | 89.14 | 1.88                         |
| oprD           | 7A | 28.32 | 87.36 | 2 MultipleMeltPeaks          |
| oprJ           | 7A | 31.81 | 88.47 | 1.91                         |
| pbp            | 7A |       |       | LowEfficiency, CtIsSmall, S: |
| pbp2x          | 7A |       |       | NoAmplification              |
| Pbp5           | 7A |       |       | CurveFitFailed               |
| penA           | 7A | 33.19 | 88.89 | 1.86                         |
| pikR1          | 7A | 38.76 | 83.16 | 1.75 MultipleMeltPeaks       |
| pikR2          | 7A | 33.12 | 84.63 | 2.04 MultipleMeltPeaks       |
| pmrA           | 7A | 22.53 | 80.21 | 2.1                          |
| pncA           | 7A | 34.33 | 92.82 | 1.74                         |
| putative multi | 7A | 31.02 | 84.81 | 1.99                         |
| qac            | 7A | 38.35 | 74.84 | 1.9 MultipleMeltPeaks        |
| qacA           | 7A | 38.36 | 81.78 | 1.86                         |
| qacA/qacB      | 7A |       |       | NoAmplification              |
| qacEdelta1-0   | 7A |       |       | LowEfficiency, CtIsSmall, C: |
| qacEdelta1-0   | 7A | 27.62 | 86.88 | 2.04 MultipleMeltPeaks       |
| qacH-01        | 7A | 35.82 | 87.01 | 1.87 MultipleMeltPeaks       |
| qacH-02        | 7A | 37.18 | 83.59 | 1.61                         |
| qnrA           | 7A | 37.43 | 81.21 | 1.9                          |

|              |    |       |       |      |                              |
|--------------|----|-------|-------|------|------------------------------|
| rarD-02      | 7A |       |       |      | NoAmplification              |
| sat4         | 7A |       |       |      | LowEfficiency, CtIsSmall, S: |
| sdeB         | 7A |       |       |      | LowEfficiency, CtIsSmall, Ci |
| spcN-01      | 7A | 39.95 | 62.39 | 1.75 | MultipleMeltPeaks            |
| speA         | 7A |       |       |      | NoAmplification              |
| str          | 7A |       |       |      | BadR2, LowEfficiency, CtIsS  |
| strA         | 7A |       |       |      | LowEfficiency, CtIsSmall, Ci |
| strB         | 7A |       |       |      | CurveFitFailed               |
| sul1         | 7A | 30.95 | 90.23 | 1.97 |                              |
| sul2         | 7A |       |       |      | BadR2, LowEfficiency, CtIsS  |
| sulA/foIP-01 | 7A | 19.64 | 81.51 | 1.99 |                              |
| sulA/foIP-03 | 7A | 20.32 | 83.08 | 2    |                              |
| tet(32)      | 7A |       |       |      | NoAmplification              |
| tet(34)      | 7A | 27.24 | 76.38 | 2.06 |                              |
| tet(35)      | 7A | 37.6  | 86.33 | 1.9  | MultipleMeltPeaks            |
| tet(36)-A    | 7A |       |       |      | CurveFitFailed               |
| tet(36)-B    | 7A |       |       |      | NoAmplification              |
| tet(37)      | 7A | 33.81 | 92.38 | 1.83 |                              |
| tetA-01      | 7A | 30.36 | 85.14 | 1.98 |                              |
| tetA-02      | 7A | 35.39 | 86.27 | 1.82 | MultipleMeltPeaks            |
| tetB-01      | 7A | 31.78 | 88.81 | 1.95 |                              |
| tetB-02      | 7A | 34.31 | 78.19 | 1.91 | MultipleMeltPeaks            |
| tetC-01      | 7A |       |       |      | NoAmplification              |
| tetC-02      | 7A |       |       |      | CurveFitFailed               |
| tetD-01      | 7A |       |       |      | LowEfficiency, CtIsSmall, Ci |
| tetD-02      | 7A | 39.58 | 63.22 | 1.67 | MultipleMeltPeaks            |
| tetE         | 7A |       |       |      | NoAmplification              |
| tetG-01      | 7A | 35.5  | 85.62 | 1.91 | MultipleMeltPeaks            |
| tetG-02      | 7A | 37.4  | 80.1  | 1.76 | MultipleMeltPeaks            |
| tetH         | 7A |       |       |      | NoAmplification              |
| tetJ         | 7A | 36.15 | 85.93 | 1.87 |                              |
| tetK         | 7A |       |       |      | NoAmplification              |
| tetL-01      | 7A | 38.13 | 62.5  | 1.91 | MultipleMeltPeaks            |
| tetL-02      | 7A | 37.4  | 85.4  | 1.65 |                              |
| tetM-01      | 7A | 23.72 | 76.25 | 2.01 |                              |
| tetM-02      | 7A | 23.86 | 78.26 | 2.02 |                              |
| tetO-01      | 7A |       |       |      | LowEfficiency, CtIsSmall, S: |
| tetPA        | 7A |       |       |      | NoAmplification              |
| tetPB-01     | 7A |       |       |      | NoAmplification              |
| tetPB-02     | 7A | 29.55 | 85.17 | 2.02 |                              |
| tetPB-03     | 7A |       |       |      | LowEfficiency, CtIsSmall, S: |
| tetPB-05     | 7A |       |       |      | LowEfficiency, CtIsSmall, S: |
| tetQ         | 7A |       |       |      | NoAmplification              |
| tetR-02      | 7A | 28.65 | 89.89 | 1.97 | MultipleMeltPeaks            |
| tetR-03      | 7A |       |       |      | NoAmplification              |
| tetS         | 7A | 38.07 | 88.42 | 1.84 | MultipleMeltPeaks            |

|             |    |       |       |      |                              |
|-------------|----|-------|-------|------|------------------------------|
| tetT        | 7A |       |       |      | NoAmplification              |
| tetU-01     | 7A |       |       |      | NoAmplification              |
| tetV        | 7A |       |       |      | NoAmplification              |
| tetW-01     | 7A | 20.53 | 82.23 | 2.01 |                              |
| tetX        | 7A |       |       |      | NoAmplification              |
| tnpA-01     | 7A | 37.93 | 80.19 | 2    |                              |
| tnpA-02     | 7A | 35.91 | 85.58 | 1.72 |                              |
| tnpA-03     | 7A | 24.2  | 78.34 | 2.09 |                              |
| tnpA-04     | 7A | 37.42 | 65.04 | 1.88 | MultipleMeltPeaks            |
| tnpA-05     | 7A |       |       |      | CurveFitFailed               |
| tnpA-07     | 7A |       |       |      | NoAmplification              |
| tolC-01     | 7A | 36.11 | 84.27 | 1.79 | MultipleMeltPeaks            |
| tolC-02     | 7A | 28.83 | 87.27 | 1.98 | MultipleMeltPeaks            |
| tolC-03     | 7A | 30.76 | 85.51 | 1.94 |                              |
| Tp614       | 7A |       |       |      | CurveFitFailed               |
| ttgA        | 7A | 33.65 | 84.03 | 1.86 |                              |
| ttgB        | 7A | 34.34 | 84.23 | 1.9  |                              |
| vanA        | 7A |       |       |      | NoAmplification              |
| vanB-01     | 7A | 32.74 | 84.08 | 2.01 |                              |
| vanC-01     | 7A |       |       |      | CurveFitFailed               |
| vanC-02     | 7A |       |       |      | LowEfficiency, CtIsSmall, Ct |
| vanC-03     | 7A | 25.84 | 87.87 | 1.94 | MultipleMeltPeaks            |
| vanC1       | 7A | 41.27 | 81.13 | 1.7  | MultipleMeltPeaks            |
| vanC2/vanC3 | 7A | 32.28 | 89.9  | 1.94 |                              |
| vanG        | 7A |       |       |      | BadR2, HighEfficiency, CtIs  |
| vanHB       | 7A | 37.28 | 78.41 | 1.88 | MultipleMeltPeaks            |
| vanHD       | 7A | 36.33 | 88.36 | 1.78 |                              |
| vanRA-01    | 7A | 37.63 | 77.6  | 1.86 |                              |
| vanRA-02    | 7A |       |       |      | NoAmplification              |
| vanRB       | 7A | 32.36 | 86.76 | 2.06 |                              |
| vanRC       | 7A |       |       |      | CurveFitFailed               |
| vanRC4      | 7A |       |       |      | CurveFitFailed               |
| vanRD       | 7A |       |       |      | NoAmplification              |
| vanSA       | 7A |       |       |      | BadR2, LowEfficiency, CtIs   |
| vanSB       | 7A | 28.05 | 75.11 | 2.09 |                              |
| vanSC-01    | 7A | 34.99 | 84.38 | 1.93 |                              |
| vanSC-02    | 7A |       |       |      | NoAmplification              |
| vanTC-01    | 7A |       |       |      | LowEfficiency, CtIsSmall, S  |
| vanTC-02    | 7A |       |       |      | CurveFitFailed               |
| vanTE       | 7A |       |       |      | CurveFitFailed               |
| vanTG       | 7A | 37.31 | 73.8  | 2.28 |                              |
| vanWB       | 7A |       |       |      | CurveFitFailed               |
| vanWG       | 7A |       |       |      | LowEfficiency, CtIsSmall, S  |
| vanXA       | 7A |       |       |      | NoAmplification              |
| vanXB       | 7A |       |       |      | NoAmplification              |
| vanXD       | 7A | 28.67 | 75.65 | 2.09 |                              |

|              |    |       |       |      |                              |
|--------------|----|-------|-------|------|------------------------------|
| vanYB        | 7A |       |       |      | CurveFitFailed               |
| vanYD-01     | 7A | 30.54 | 89.84 | 1.85 |                              |
| vanYD-02     | 7A |       |       |      | LowEfficiency, CtIsSmall, S: |
| vatB-01      | 7A |       |       |      | LowEfficiency, CtIsSmall, S: |
| vatB-02      | 7A |       |       |      | CurveFitFailed               |
| vatC-01      | 7A |       |       |      | CurveFitFailed               |
| vatC-02      | 7A | 38.16 | 77.15 | 1.82 | MultipleMeltPeaks            |
| vatE-01      | 7A | 26.98 | 77.41 | 2.11 |                              |
| vatE-02      | 7A | 37.04 | 75.37 | 2.03 |                              |
| vgaA-01      | 7A | 37.25 | 83.6  | 1.79 |                              |
| vgaA-02      | 7A |       |       |      | CurveFitFailed               |
| vgb-01       | 7A | 40.92 | 79.94 | 1.72 | MultipleMeltPeaks            |
| vgbB-01      | 7A | 36.96 | 89.04 | 1.76 | MultipleMeltPeaks            |
| vgbB-02      | 7A |       |       |      | NoAmplification              |
| yceE/mdtG-0  | 7A | 39.47 | 82.41 | 1.8  |                              |
| yceE/mdtG-0  | 7A |       |       |      | NoAmplification              |
| yceL/mdtH-0  | 7A | 27.65 | 88.72 | 1.98 |                              |
| yceL/mdtH-0  | 7A |       |       |      | NoAmplification              |
| yceL/mdtH-0  | 7A | 35.3  | 89.57 | 1.84 | MultipleMeltPeaks            |
| yidY/mdtL-01 | 7A | 29.12 | 88.9  | 1.96 |                              |
| yidY/mdtL-02 | 7A | 34.68 | 76.61 | 1.79 | MultipleMeltPeaks            |































| Assay          | Sample | Ct | Tm    | Efficiency | flag                      |
|----------------|--------|----|-------|------------|---------------------------|
| 16S rRNA       | 7B     |    | 22.36 | 82.22      | 1.95                      |
| aac            | 7B     |    | 35.53 | 82.24      | 1.85                      |
| aac(6')-Ib(akε | 7B     |    |       |            | NoAmplification           |
| aac(6')-Ib(akε | 7B     |    |       |            | CurveFitFailed            |
| aac(6')-Ib(akε | 7B     |    |       |            | NoAmplification           |
| aac(6')-II     | 7B     |    | 37.93 | 80.66      | 1.81                      |
| aac(6')I1      | 7B     |    |       |            | NoAmplification           |
| aacA/aphD      | 7B     |    | 27.61 | 71.9       | 2.07                      |
| aacC           | 7B     |    | 36.12 | 84.02      | 1.8                       |
| aacC1          | 7B     |    |       |            | NoAmplification           |
| aacC2          | 7B     |    |       |            | NoAmplification           |
| aacC4          | 7B     |    |       |            | NoAmplification           |
| aadA-01        | 7B     |    |       |            | CurveFitFailed            |
| aadA-02        | 7B     |    | 35.25 | 80.39      | 1.91                      |
| aadA-1-01      | 7B     |    |       |            | NoAmplification           |
| aadA-1-02      | 7B     |    |       |            | NoAmplification           |
| aadA1          | 7B     |    |       |            | NoAmplification           |
| aadA2-01       | 7B     |    |       |            | NoAmplification           |
| aadA2-02       | 7B     |    | 34.15 | 74.93      | 2.1                       |
| aadA2-03       | 7B     |    |       |            | NoAmplification           |
| aadA5-01       | 7B     |    |       |            | NoAmplification           |
| aadA5-02       | 7B     |    |       |            | NoAmplification           |
| aadA9-01       | 7B     |    |       |            | NoAmplification           |
| aadA9-02       | 7B     |    |       |            | NoAmplification           |
| aadD           | 7B     |    |       |            | NoAmplification           |
| aadE           | 7B     |    |       |            | NoAmplification           |
| acrA-01        | 7B     |    |       |            | NoAmplification           |
| acrA-02        | 7B     |    |       |            | NoAmplification           |
| acrA-03        | 7B     |    |       |            | NoAmplification           |
| acrA-04        | 7B     |    | 35.59 | 80.07      | 1.87 MultipleMeltPeaks    |
| acrA-05        | 7B     |    |       |            | CtIsLarge, CurveFitFailed |
| acrB-01        | 7B     |    |       |            | NoAmplification           |
| acrF           | 7B     |    | 32.19 | 83.1       | 1.8                       |
| acrR-01        | 7B     |    |       |            | NoAmplification           |
| acrR-02        | 7B     |    |       |            | NoAmplification           |
| Actin          | 7B     |    | 24.05 | 87.14      | 1.9 MultipleMeltPeaks     |
| adeA           | 7B     |    |       |            | NoAmplification           |
| ampC-01        | 7B     |    | 37.51 | 78.76      | 1.83                      |
| ampC-02        | 7B     |    |       |            | NoAmplification           |
| ampC-04        | 7B     |    | 35.04 | 77.86      | 2.06                      |
| ampC-05        | 7B     |    |       |            | NoAmplification           |
| ampC-06        | 7B     |    |       |            | NoAmplification           |
| ampC-07        | 7B     |    |       |            | NoAmplification           |
| ampC-09        | 7B     |    |       |            | NoAmplification           |
| ampC/blaDH     | 7B     |    | 36.03 | 75.71      | 1.91                      |

|               |    |       |       |      |                   |
|---------------|----|-------|-------|------|-------------------|
| aph           | 7B |       |       |      | NoAmplification   |
| aph(2')-Id-01 | 7B |       |       |      | NoAmplification   |
| aph(2')-Id-02 | 7B |       |       |      | NoAmplification   |
| aph6ia        | 7B |       |       |      | NoAmplification   |
| aphA1(aka kε  | 7B |       |       |      | NoAmplification   |
| bacA-01       | 7B |       |       |      | NoAmplification   |
| bacA-02       | 7B |       |       |      | NoAmplification   |
| BETA-globin   | 7B | 25.41 | 84.05 | 2.01 |                   |
| bla-ACC-1     | 7B |       |       |      | NoAmplification   |
| bla-L1        | 7B | 33.8  | 81.8  | 1.96 |                   |
| bla1          | 7B |       |       |      | NoAmplification   |
| blaCMY        | 7B |       |       |      | NoAmplification   |
| blaCMY2-01    | 7B |       |       |      | NoAmplification   |
| blaCMY2-02    | 7B | 38.1  | 83.02 | 1.72 |                   |
| blaCTX-M-01   | 7B | 35.22 | 86.38 | 1.95 |                   |
| blaCTX-M-02   | 7B | 37.22 | 72.76 | 1.75 | MultipleMeltPeaks |
| blaCTX-M-03   | 7B |       |       |      | NoAmplification   |
| blaCTX-M-04   | 7B |       |       |      | NoAmplification   |
| blaCTX-M-05   | 7B | 33.78 | 76.37 | 1.84 |                   |
| blaCTX-M-06   | 7B |       |       |      | NoAmplification   |
| blaGES        | 7B |       |       |      | NoAmplification   |
| blaIMP-01     | 7B |       |       |      | NoAmplification   |
| blaIMP-02     | 7B |       |       |      | NoAmplification   |
| blaMOX/blaC   | 7B |       |       |      | NoAmplification   |
| blaOCH        | 7B |       |       |      | NoAmplification   |
| blaOKP        | 7B |       |       |      | NoAmplification   |
| blaOXA1/blaC  | 7B |       |       |      | NoAmplification   |
| blaOXA10-01   | 7B |       |       |      | NoAmplification   |
| blaOXA10-02   | 7B |       |       |      | NoAmplification   |
| blaOXY        | 7B |       |       |      | NoAmplification   |
| blaPAO        | 7B |       |       |      | NoAmplification   |
| blaPER        | 7B |       |       |      | NoAmplification   |
| blaPSE        | 7B |       |       |      | NoAmplification   |
| blaROB        | 7B |       |       |      | NoAmplification   |
| blaSFO        | 7B | 34.13 | 80.44 | 1.91 |                   |
| blaSHV-01     | 7B |       |       |      | NoAmplification   |
| blaSHV-02     | 7B | 36.36 | 77.68 | 1.89 |                   |
| blaTEM        | 7B | 29.5  | 79.49 | 2.01 |                   |
| blaTLA        | 7B |       |       |      | NoAmplification   |
| blaVEB        | 7B |       |       |      | NoAmplification   |
| blaVIM        | 7B |       |       |      | NoAmplification   |
| blaZ          | 7B |       |       |      | NoAmplification   |
| carB          | 7B |       |       |      | NoAmplification   |
| catA1         | 7B |       |       |      | NoAmplification   |
| catB3         | 7B |       |       |      | NoAmplification   |
| catB8         | 7B | 36.22 | 77.32 | 1.83 | MultipleMeltPeaks |

|            |    |       |       |      |                             |
|------------|----|-------|-------|------|-----------------------------|
| ceoA       | 7B | 36.74 | 82.37 | 1.81 | MultipleMeltPeaks           |
| cepA       | 7B |       |       |      | NoAmplification             |
| cfiA       | 7B | 31.49 | 86.3  | 1.92 |                             |
| cfr        | 7B |       |       |      | NoAmplification             |
| cfxA       | 7B | 28.98 | 77.27 | 2.04 |                             |
| cmeA       | 7B |       |       |      | NoAmplification             |
| cmlA1-01   | 7B |       |       |      | NoAmplification             |
| cmlA1-02   | 7B |       |       |      | NoAmplification             |
| cmr        | 7B |       |       |      | NoAmplification             |
| cmx(A)     | 7B | 31.32 | 84.65 | 2.01 |                             |
| cphA-01    | 7B | 31.29 | 84.58 | 1.9  |                             |
| cphA-02    | 7B | 31.89 | 77.19 | 2    | MultipleMeltPeaks           |
| dfrA1      | 7B |       |       |      | NoAmplification             |
| dfrA12     | 7B |       |       |      | NoAmplification             |
| emrD       | 7B |       |       |      | NoAmplification             |
| ereA       | 7B |       |       |      | NoAmplification             |
| ereB       | 7B |       |       |      | NoAmplification             |
| erm(34)    | 7B |       |       |      | NoAmplification             |
| erm(35)    | 7B |       |       |      | NoAmplification             |
| erm(36)    | 7B |       |       |      | NoAmplification             |
| ermA       | 7B |       |       |      | NoAmplification             |
| ermA/ermTR | 7B |       |       |      | NoAmplification             |
| ermB       | 7B |       |       |      | NoAmplification             |
| ermC       | 7B |       |       |      | NoAmplification             |
| ermF       | 7B |       |       |      | NoAmplification             |
| ermJ/ermD  | 7B |       |       |      | NoAmplification             |
| ermK-01    | 7B |       |       |      | NoAmplification             |
| ermK-02    | 7B |       |       |      | NoAmplification             |
| ermT-01    | 7B |       |       |      | NoAmplification             |
| ermT-02    | 7B |       |       |      | NoAmplification             |
| ermX       | 7B |       |       |      | NoAmplification             |
| ermY       | 7B |       |       |      | NoAmplification             |
| fabK       | 7B | 28.12 | 79.62 | 2.02 |                             |
| floR       | 7B |       |       |      | NoAmplification             |
| folA       | 7B |       |       |      | NoAmplification             |
| fosB       | 7B |       |       |      | LowEfficiency, CtlSmall, S: |
| fosX       | 7B |       |       |      | NoAmplification             |
| fox5       | 7B | 32.02 | 86.11 | 1.97 |                             |
| imiR       | 7B |       |       |      | BadR2, SaturationBaselineI  |
| ImrA-01    | 7B |       |       |      | NoAmplification             |
| intl       | 7B | 34.47 | 79.93 | 1.97 |                             |
| intl1      | 7B | 23.53 | 87.06 | 2    | MultipleMeltPeaks           |
| IS613      | 7B | 26.95 | 79.62 | 2.03 |                             |
| lnuA-01    | 7B |       |       |      | NoAmplification             |
| lnuB-01    | 7B |       |       |      | NoAmplification             |
| lnuB-02    | 7B |       |       |      | NoAmplification             |

|               |    |       |       |      |                   |
|---------------|----|-------|-------|------|-------------------|
| lnuC          | 7B |       |       |      | NoAmplification   |
| marR-01       | 7B |       |       |      | NoAmplification   |
| matA/mel      | 7B | 26.83 | 77.57 | 2.04 |                   |
| mdet1         | 7B |       |       |      | NoAmplification   |
| mdtA          | 7B |       |       |      | NoAmplification   |
| mdtE/yhiU     | 7B |       |       |      | NoAmplification   |
| mecA          | 7B |       |       |      | NoAmplification   |
| mefA          | 7B | 25.4  | 80.54 | 1.98 |                   |
| mepA          | 7B |       |       |      | NoAmplification   |
| mexA          | 7B |       |       |      | NoAmplification   |
| mexD          | 7B | 34.01 | 78.74 | 2.04 |                   |
| mexE          | 7B | 29.55 | 82.51 | 1.93 |                   |
| mexF          | 7B | 35    | 80.64 | 2.02 |                   |
| mphA-01       | 7B | 32.49 | 80.44 | 2.01 |                   |
| mphA-02       | 7B | 33.54 | 76.27 | 1.69 | MultipleMeltPeaks |
| mphB          | 7B |       |       |      | NoAmplification   |
| mphC          | 7B |       |       |      | NoAmplification   |
| msrA-01       | 7B | 39.41 | 72.35 | 1.87 |                   |
| msrC-01       | 7B |       |       |      | NoAmplification   |
| mtrC-01       | 7B |       |       |      | NoAmplification   |
| mtrC-02       | 7B |       |       |      | NoAmplification   |
| mtrD-02       | 7B | 30.17 | 82.92 | 1.99 |                   |
| mtrD-03       | 7B |       |       |      | NoAmplification   |
| NDM1          | 7B |       |       |      | NoAmplification   |
| nimE          | 7B |       |       |      | NoAmplification   |
| nisB          | 7B |       |       |      | NoAmplification   |
| oleC          | 7B |       |       |      | NoAmplification   |
| oprD          | 7B | 34.41 | 80.83 | 1.95 |                   |
| oprJ          | 7B |       |       |      | NoAmplification   |
| pbp           | 7B |       |       |      | NoAmplification   |
| pbp2x         | 7B |       |       |      | NoAmplification   |
| Pbp5          | 7B |       |       |      | NoAmplification   |
| penA          | 7B |       |       |      | NoAmplification   |
| pikR1         | 7B |       |       |      | NoAmplification   |
| pikR2         | 7B | 39.2  | 75.59 | 1.65 | MultipleMeltPeaks |
| pmrA          | 7B |       |       |      | NoAmplification   |
| pncA          | 7B |       |       |      | NoAmplification   |
| putative mult | 7B |       |       |      | NoAmplification   |
| qac           | 7B |       |       |      | NoAmplification   |
| qacA          | 7B |       |       |      | NoAmplification   |
| qacA/qacB     | 7B |       |       |      | NoAmplification   |
| qacEdelta1-0  | 7B |       |       |      | NoAmplification   |
| qacEdelta1-0  | 7B | 36.97 | 74.73 | 1.89 |                   |
| qacH-01       | 7B | 37.1  | 77.6  | 1.81 |                   |
| qacH-02       | 7B |       |       |      | NoAmplification   |
| qnrA          | 7B |       |       |      | NoAmplification   |



|              |    |       |       |      |                           |
|--------------|----|-------|-------|------|---------------------------|
| rarD-02      | 7B |       |       |      | NoAmplification           |
| sat4         | 7B |       |       |      | NoAmplification           |
| sdeB         | 7B |       |       |      | NoAmplification           |
| spcN-01      | 7B |       |       |      | NoAmplification           |
| speA         | 7B |       |       |      | NoAmplification           |
| str          | 7B |       |       |      | NoAmplification           |
| strA         | 7B |       |       |      | NoAmplification           |
| strB         | 7B |       |       |      | CurveFitFailed            |
| sul1         | 7B |       |       |      | NoAmplification           |
| sul2         | 7B |       |       |      | NoAmplification           |
| sulA/foIP-01 | 7B |       |       |      | NoAmplification           |
| sulA/foIP-03 | 7B | 28.29 | 81.64 | 1.94 |                           |
| tet(32)      | 7B |       |       |      | NoAmplification           |
| tet(34)      | 7B | 30.65 | 75.8  | 1.98 |                           |
| tet(35)      | 7B |       |       |      | CtIsLarge, CurveFitFailed |
| tet(36)-A    | 7B |       |       |      | NoAmplification           |
| tet(36)-B    | 7B |       |       |      | CurveFitFailed            |
| tet(37)      | 7B |       |       |      | CurveFitFailed            |
| tetA-01      | 7B |       |       |      | NoAmplification           |
| tetA-02      | 7B |       |       |      | NoAmplification           |
| tetB-01      | 7B |       |       |      | NoAmplification           |
| tetB-02      | 7B |       |       |      | NoAmplification           |
| tetC-01      | 7B |       |       |      | NoAmplification           |
| tetC-02      | 7B |       |       |      | NoAmplification           |
| tetD-01      | 7B |       |       |      | NoAmplification           |
| tetD-02      | 7B |       |       |      | NoAmplification           |
| tetE         | 7B |       |       |      | NoAmplification           |
| tetG-01      | 7B |       |       |      | NoAmplification           |
| tetG-02      | 7B |       |       |      | NoAmplification           |
| tetH         | 7B |       |       |      | NoAmplification           |
| tetJ         | 7B |       |       |      | NoAmplification           |
| tetK         | 7B |       |       |      | NoAmplification           |
| tetL-01      | 7B |       |       |      | NoAmplification           |
| tetL-02      | 7B | 36.27 | 85.41 | 1.73 |                           |
| tetM-01      | 7B | 37.57 | 78.37 | 1.8  |                           |
| tetM-02      | 7B | 29.12 | 77.5  | 1.95 |                           |
| tetO-01      | 7B |       |       |      | NoAmplification           |
| tetPA        | 7B |       |       |      | NoAmplification           |
| tetPB-01     | 7B |       |       |      | NoAmplification           |
| tetPB-02     | 7B |       |       |      | CurveFitFailed            |
| tetPB-03     | 7B |       |       |      | NoAmplification           |
| tetPB-05     | 7B |       |       |      | NoAmplification           |
| tetQ         | 7B |       |       |      | NoAmplification           |
| tetR-02      | 7B |       |       |      | NoAmplification           |
| tetR-03      | 7B |       |       |      | NoAmplification           |
| tetS         | 7B |       |       |      | NoAmplification           |

|             |    |       |       |      |                              |
|-------------|----|-------|-------|------|------------------------------|
| tetT        | 7B |       |       |      | NoAmplification              |
| tetU-01     | 7B |       |       |      | NoAmplification              |
| tetV        | 7B |       |       |      | NoAmplification              |
| tetW-01     | 7B | 28.09 | 81.39 | 1.96 |                              |
| tetX        | 7B |       |       |      | NoAmplification              |
| tnpA-01     | 7B |       |       |      | NoAmplification              |
| tnpA-02     | 7B |       |       |      | NoAmplification              |
| tnpA-03     | 7B | 35.93 | 73.93 | 2.08 |                              |
| tnpA-04     | 7B |       |       |      | NoAmplification              |
| tnpA-05     | 7B |       |       |      | NoAmplification              |
| tnpA-07     | 7B |       |       |      | NoAmplification              |
| tolC-01     | 7B |       |       |      | NoAmplification              |
| tolC-02     | 7B | 36.09 | 83.67 | 1.86 |                              |
| tolC-03     | 7B |       |       |      | NoAmplification              |
| Tp614       | 7B | 35.69 | 73.6  | 1.88 |                              |
| ttgA        | 7B |       |       |      | NoAmplification              |
| ttgB        | 7B |       |       |      | NoAmplification              |
| vanA        | 7B |       |       |      | NoAmplification              |
| vanB-01     | 7B |       |       |      | BadR2, CtlIsLarge, CurveFitf |
| vanC-01     | 7B |       |       |      | NoAmplification              |
| vanC-02     | 7B |       |       |      | NoAmplification              |
| vanC-03     | 7B | 32.63 | 85.87 | 1.97 |                              |
| vanC1       | 7B |       |       |      | NoAmplification              |
| vanC2/vanC3 | 7B | 35.39 | 80.92 | 1.87 | MultipleMeltPeaks            |
| vanG        | 7B |       |       |      | NoAmplification              |
| vanHB       | 7B |       |       |      | NoAmplification              |
| vanHD       | 7B |       |       |      | NoAmplification              |
| vanRA-01    | 7B |       |       |      | NoAmplification              |
| vanRA-02    | 7B |       |       |      | NoAmplification              |
| vanRB       | 7B | 38    | 87.46 | 1.72 |                              |
| vanRC       | 7B |       |       |      | NoAmplification              |
| vanRC4      | 7B |       |       |      | NoAmplification              |
| vanRD       | 7B |       |       |      | NoAmplification              |
| vanSA       | 7B |       |       |      | NoAmplification              |
| vanSB       | 7B | 29.3  | 74.52 | 2.07 |                              |
| vanSC-01    | 7B |       |       |      | NoAmplification              |
| vanSC-02    | 7B |       |       |      | NoAmplification              |
| vanTC-01    | 7B |       |       |      | NoAmplification              |
| vanTC-02    | 7B |       |       |      | NoAmplification              |
| vanTE       | 7B |       |       |      | NoAmplification              |
| vanTG       | 7B |       |       |      | NoAmplification              |
| vanWB       | 7B |       |       |      | NoAmplification              |
| vanWG       | 7B | 32.96 | 74.96 | 2.03 |                              |
| vanXA       | 7B |       |       |      | CurveFitFailed               |
| vanXB       | 7B |       |       |      | NoAmplification              |
| vanXD       | 7B | 30.25 | 75.08 | 2.03 |                              |

|              |    |       |       |      |                 |
|--------------|----|-------|-------|------|-----------------|
| vanYB        | 7B |       |       |      | NoAmplification |
| vanYD-01     | 7B |       |       |      | CurveFitFailed  |
| vanYD-02     | 7B |       |       |      | NoAmplification |
| vatB-01      | 7B |       |       |      | NoAmplification |
| vatB-02      | 7B |       |       |      | NoAmplification |
| vatC-01      | 7B |       |       |      | NoAmplification |
| vatC-02      | 7B |       |       |      | CurveFitFailed  |
| vatE-01      | 7B | 30.72 | 76.88 | 2.08 |                 |
| vatE-02      | 7B |       |       |      | NoAmplification |
| vgaA-01      | 7B |       |       |      | NoAmplification |
| vgaA-02      | 7B |       |       |      | NoAmplification |
| vgb-01       | 7B |       |       |      | NoAmplification |
| vgbB-01      | 7B |       |       |      | NoAmplification |
| vgbB-02      | 7B |       |       |      | NoAmplification |
| yceE/mdtG-0  | 7B |       |       |      | NoAmplification |
| yceE/mdtG-0  | 7B |       |       |      | NoAmplification |
| yceL/mdtH-0  | 7B | 35.38 | 75.97 | 1.94 |                 |
| yceL/mdtH-0  | 7B |       |       |      | NoAmplification |
| yceL/mdtH-0  | 7B |       |       |      | NoAmplification |
| yidY/mdtL-01 | 7B |       |       |      | CurveFitFailed  |
| yidY/mdtL-02 | 7B |       |       |      | NoAmplification |































| Assay          | Sample | Ct | Tm    | Efficiency | flag                   |
|----------------|--------|----|-------|------------|------------------------|
| 16S rRNA       | 7C     |    | 20.65 | 81.71      | 1.99                   |
| aac            | 7C     |    | 36.22 | 62.84      | 1.68 MultipleMeltPeaks |
| aac(6')-Ib(akε | 7C     |    |       |            | NoAmplification        |
| aac(6')-Ib(akε | 7C     |    | 33.22 | 82.88      | 1.93                   |
| aac(6')-Ib(akε | 7C     |    | 38.58 | 78.4       | 1.88                   |
| aac(6')-II     | 7C     |    |       |            | NoAmplification        |
| aac(6')I1      | 7C     |    | 37.87 | 88.02      | 1.74                   |
| aacA/aphD      | 7C     |    |       |            | NoAmplification        |
| aacC           | 7C     |    |       |            | NoAmplification        |
| aacC1          | 7C     |    |       |            | CurveFitFailed         |
| aacC2          | 7C     |    |       |            | NoAmplification        |
| aacC4          | 7C     |    |       |            | NoAmplification        |
| aadA-01        | 7C     |    |       |            | NoAmplification        |
| aadA-02        | 7C     |    | 39.75 | 80.3       | 1.8                    |
| aadA-1-01      | 7C     |    |       |            | NoAmplification        |
| aadA-1-02      | 7C     |    |       |            | NoAmplification        |
| aadA1          | 7C     |    |       |            | NoAmplification        |
| aadA2-01       | 7C     |    |       |            | CurveFitFailed         |
| aadA2-02       | 7C     |    |       |            | NoAmplification        |
| aadA2-03       | 7C     |    |       |            | NoAmplification        |
| aadA5-01       | 7C     |    |       |            | NoAmplification        |
| aadA5-02       | 7C     |    | 39.72 | 83.99      | 1.75                   |
| aadA9-01       | 7C     |    |       |            | NoAmplification        |
| aadA9-02       | 7C     |    |       |            | NoAmplification        |
| aadD           | 7C     |    |       |            | NoAmplification        |
| aadE           | 7C     |    | 36    | 71.63      | 1.9                    |
| acrA-01        | 7C     |    | 29.51 | 83.08      | 1.94                   |
| acrA-02        | 7C     |    |       |            | CurveFitFailed         |
| acrA-03        | 7C     |    |       |            | CurveFitFailed         |
| acrA-04        | 7C     |    | 38.36 | 61.23      | 1.86 MultipleMeltPeaks |
| acrA-05        | 7C     |    | 32.06 | 88.52      | 1.88                   |
| acrB-01        | 7C     |    | 32.4  | 76.28      | 1.98                   |
| acrF           | 7C     |    | 37.99 | 78.05      | 1.96                   |
| acrR-01        | 7C     |    | 37.04 | 90.49      | 1.71                   |
| acrR-02        | 7C     |    | 36.76 | 85.44      | 1.77                   |
| Actin          | 7C     |    | 26.42 | 86.89      | 1.95 MultipleMeltPeaks |
| adeA           | 7C     |    |       |            | NoAmplification        |
| ampC-01        | 7C     |    |       |            | NoAmplification        |
| ampC-02        | 7C     |    |       |            | NoAmplification        |
| ampC-04        | 7C     |    | 36.41 | 90.58      | 1.69                   |
| ampC-05        | 7C     |    |       |            | NoAmplification        |
| ampC-06        | 7C     |    |       |            | NoAmplification        |
| ampC-07        | 7C     |    |       |            | CurveFitFailed         |
| ampC-09        | 7C     |    |       |            | NoAmplification        |
| ampC/blaDH     | 7C     |    |       |            | NoAmplification        |

|               |    |       |       |      |                   |
|---------------|----|-------|-------|------|-------------------|
| aph           | 7C |       |       |      | NoAmplification   |
| aph(2')-Id-01 | 7C |       |       |      | NoAmplification   |
| aph(2')-Id-02 | 7C |       |       |      | NoAmplification   |
| aph6ia        | 7C |       |       |      | NoAmplification   |
| aphA1(aka kε  | 7C |       |       |      | NoAmplification   |
| bacA-01       | 7C |       |       |      | NoAmplification   |
| bacA-02       | 7C |       |       |      | NoAmplification   |
| BETA-globin   | 7C | 27.08 | 84.23 | 1.97 |                   |
| bla-ACC-1     | 7C |       |       |      | NoAmplification   |
| bla-L1        | 7C | 33.96 | 84.16 | 1.85 |                   |
| bla1          | 7C |       |       |      | NoAmplification   |
| blaCMY        | 7C |       |       |      | NoAmplification   |
| blaCMY2-01    | 7C |       |       |      | NoAmplification   |
| blaCMY2-02    | 7C |       |       |      | NoAmplification   |
| blaCTX-M-01   | 7C | 39.98 | 61.9  | 1.72 | MultipleMeltPeaks |
| blaCTX-M-02   | 7C |       |       |      | NoAmplification   |
| blaCTX-M-03   | 7C |       |       |      | NoAmplification   |
| blaCTX-M-04   | 7C | 34.96 | 88.92 | 1.82 |                   |
| blaCTX-M-05   | 7C | 33.93 | 76.36 | 1.82 |                   |
| blaCTX-M-06   | 7C |       |       |      | NoAmplification   |
| blaGES        | 7C |       |       |      | NoAmplification   |
| blaIMP-01     | 7C |       |       |      | NoAmplification   |
| blaIMP-02     | 7C |       |       |      | NoAmplification   |
| blaMOX/blaC   | 7C |       |       |      | NoAmplification   |
| blaOCH        | 7C |       |       |      | NoAmplification   |
| blaOKP        | 7C |       |       |      | NoAmplification   |
| blaOXA1/blaC  | 7C |       |       |      | NoAmplification   |
| blaOXA10-01   | 7C |       |       |      | NoAmplification   |
| blaOXA10-02   | 7C |       |       |      | NoAmplification   |
| blaOXY        | 7C |       |       |      | NoAmplification   |
| blaPAO        | 7C |       |       |      | NoAmplification   |
| blaPER        | 7C | 34.08 | 70.09 | 1.6  |                   |
| blaPSE        | 7C |       |       |      | NoAmplification   |
| blaROB        | 7C |       |       |      | NoAmplification   |
| blaSFO        | 7C |       |       |      | NoAmplification   |
| blaSHV-01     | 7C | 32.91 | 88.68 | 1.79 |                   |
| blaSHV-02     | 7C |       |       |      | NoAmplification   |
| blaTEM        | 7C | 27.14 | 79.29 | 1.86 |                   |
| blaTLA        | 7C |       |       |      | NoAmplification   |
| blaVEB        | 7C |       |       |      | NoAmplification   |
| blaVIM        | 7C |       |       |      | NoAmplification   |
| blaZ          | 7C |       |       |      | NoAmplification   |
| carB          | 7C |       |       |      | NoAmplification   |
| catA1         | 7C |       |       |      | NoAmplification   |
| catB3         | 7C |       |       |      | NoAmplification   |
| catB8         | 7C |       |       |      | NoAmplification   |

|            |    |       |       |      |                              |
|------------|----|-------|-------|------|------------------------------|
| ceoA       | 7C | 36.16 | 79.65 | 1.85 |                              |
| cepA       | 7C |       |       |      | NoAmplification              |
| cfiA       | 7C |       |       |      | NoAmplification              |
| cfr        | 7C |       |       |      | NoAmplification              |
| cfxA       | 7C | 25.71 | 77.66 | 2.03 |                              |
| cmeA       | 7C |       |       |      | NoAmplification              |
| cmlA1-01   | 7C |       |       |      | NoAmplification              |
| cmlA1-02   | 7C | 34.66 | 88.95 | 1.77 |                              |
| cmr        | 7C |       |       |      | NoAmplification              |
| cmx(A)     | 7C | 34.59 | 84.63 | 1.95 | MultipleMeltPeaks            |
| cphA-01    | 7C | 39.69 | 82.31 | 1.67 | MultipleMeltPeaks            |
| cphA-02    | 7C |       |       |      | CurveFitFailed               |
| dfrA1      | 7C |       |       |      | NoAmplification              |
| dfrA12     | 7C |       |       |      | NoAmplification              |
| emrD       | 7C |       |       |      | NoAmplification              |
| ereA       | 7C |       |       |      | NoAmplification              |
| ereB       | 7C |       |       |      | NoAmplification              |
| erm(34)    | 7C |       |       |      | NoAmplification              |
| erm(35)    | 7C |       |       |      | NoAmplification              |
| erm(36)    | 7C | 38.5  | 84.07 | 1.83 |                              |
| ermA       | 7C |       |       |      | NoAmplification              |
| ermA/ermTR | 7C |       |       |      | NoAmplification              |
| ermB       | 7C | 26.81 | 74.81 | 2.07 |                              |
| ermC       | 7C |       |       |      | NoAmplification              |
| ermF       | 7C | 25.53 | 74.79 | 2    |                              |
| ermJ/ermD  | 7C |       |       |      | NoAmplification              |
| ermK-01    | 7C |       |       |      | NoAmplification              |
| ermK-02    | 7C | 35.23 | 76.54 | 2.02 |                              |
| ermT-01    | 7C |       |       |      | NoAmplification              |
| ermT-02    | 7C |       |       |      | NoAmplification              |
| ermX       | 7C | 23.98 | 83.87 | 1.91 |                              |
| ermY       | 7C |       |       |      | NoAmplification              |
| fabK       | 7C | 27.36 | 79.19 | 2.13 |                              |
| floR       | 7C |       |       |      | NoAmplification              |
| folA       | 7C |       |       |      | NoAmplification              |
| fosB       | 7C |       |       |      | LowEfficiency, CtIsSmall, S: |
| fosX       | 7C |       |       |      | NoAmplification              |
| fox5       | 7C | 33.31 | 86.64 | 1.91 |                              |
| imiR       | 7C |       |       |      | NoAmplification              |
| ImrA-01    | 7C |       |       |      | NoAmplification              |
| intl       | 7C |       |       |      | CurveFitFailed               |
| intl1      | 7C | 23.67 | 87.27 | 2    | MultipleMeltPeaks            |
| IS613      | 7C | 27.95 | 79.43 | 2.03 |                              |
| lnuA-01    | 7C |       |       |      | NoAmplification              |
| lnuB-01    | 7C |       |       |      | NoAmplification              |
| lnuB-02    | 7C |       |       |      | NoAmplification              |

|                |    |       |       |      |                   |
|----------------|----|-------|-------|------|-------------------|
| lnuC           | 7C |       |       |      | CurveFitFailed    |
| marR-01        | 7C |       |       |      | NoAmplification   |
| matA/mel       | 7C | 23.99 | 77.64 | 2.02 |                   |
| mdet1          | 7C |       |       |      | NoAmplification   |
| mdtA           | 7C |       |       |      | NoAmplification   |
| mdtE/yhiU      | 7C |       |       |      | NoAmplification   |
| mecA           | 7C |       |       |      | NoAmplification   |
| mefA           | 7C | 23.36 | 80.46 | 1.94 |                   |
| mepA           | 7C | 34.35 | 81.46 | 1.98 |                   |
| mexA           | 7C |       |       |      | NoAmplification   |
| mexD           | 7C |       |       |      | NoAmplification   |
| mexE           | 7C |       |       |      | NoAmplification   |
| mexF           | 7C | 33.21 | 84.9  | 1.96 | MultipleMeltPeaks |
| mphA-01        | 7C | 33.5  | 90.73 | 1.92 |                   |
| mphA-02        | 7C | 30.21 | 77.68 | 1.79 |                   |
| mphB           | 7C |       |       |      | CurveFitFailed    |
| mphC           | 7C |       |       |      | NoAmplification   |
| msrA-01        | 7C |       |       |      | NoAmplification   |
| msrC-01        | 7C |       |       |      | NoAmplification   |
| mtrC-01        | 7C |       |       |      | NoAmplification   |
| mtrC-02        | 7C | 36.11 | 73.54 | 1.92 | MultipleMeltPeaks |
| mtrD-02        | 7C | 31.55 | 81.54 | 1.92 | MultipleMeltPeaks |
| mtrD-03        | 7C | 35.11 | 85.15 | 1.86 |                   |
| NDM1           | 7C |       |       |      | NoAmplification   |
| nimE           | 7C | 37.83 | 74.64 | 1.98 | MultipleMeltPeaks |
| nisB           | 7C | 29.7  | 76.09 | 2    |                   |
| oleC           | 7C |       |       |      | NoAmplification   |
| oprD           | 7C |       |       |      | NoAmplification   |
| oprJ           | 7C | 35.6  | 91.08 | 1.8  |                   |
| pbp            | 7C |       |       |      | NoAmplification   |
| pbp2x          | 7C | 26.58 | 75.64 | 1.93 |                   |
| Pbp5           | 7C |       |       |      | NoAmplification   |
| penA           | 7C |       |       |      | NoAmplification   |
| pikR1          | 7C | 38.48 | 81.38 | 1.78 |                   |
| pikR2          | 7C |       |       |      | NoAmplification   |
| pmrA           | 7C | 27.12 | 79.54 | 2.1  |                   |
| pncA           | 7C | 38.31 | 88.34 | 1.89 |                   |
| putative multi | 7C | 38.05 | 72.1  | 1.83 |                   |
| qac            | 7C |       |       |      | NoAmplification   |
| qacA           | 7C | 36.58 | 69.93 | 1.81 |                   |
| qacA/qacB      | 7C |       |       |      | NoAmplification   |
| qacEdelta1-0   | 7C |       |       |      | NoAmplification   |
| qacEdelta1-0   | 7C | 38.84 | 63.47 | 1.78 | MultipleMeltPeaks |
| qacH-01        | 7C |       |       |      | NoAmplification   |
| qacH-02        | 7C |       |       |      | NoAmplification   |
| qnrA           | 7C |       |       |      | NoAmplification   |

|              |    |       |       |      |                   |
|--------------|----|-------|-------|------|-------------------|
| rarD-02      | 7C |       |       |      | NoAmplification   |
| sat4         | 7C |       |       |      | NoAmplification   |
| sdeB         | 7C |       |       |      | NoAmplification   |
| spcN-01      | 7C |       |       |      | NoAmplification   |
| speA         | 7C |       |       |      | NoAmplification   |
| str          | 7C |       |       |      | NoAmplification   |
| strA         | 7C |       |       |      | NoAmplification   |
| strB         | 7C |       |       |      | NoAmplification   |
| sul1         | 7C |       |       |      | NoAmplification   |
| sul2         | 7C |       |       |      | NoAmplification   |
| sulA/foIP-01 | 7C | 25.93 | 81.26 | 1.96 |                   |
| sulA/foIP-03 | 7C | 25.24 | 82.79 | 1.96 |                   |
| tet(32)      | 7C |       |       |      | NoAmplification   |
| tet(34)      | 7C | 27.25 | 76.19 | 2.05 |                   |
| tet(35)      | 7C |       |       |      | NoAmplification   |
| tet(36)-A    | 7C |       |       |      | NoAmplification   |
| tet(36)-B    | 7C |       |       |      | NoAmplification   |
| tet(37)      | 7C | 28.44 | 76.26 | 1.99 |                   |
| tetA-01      | 7C |       |       |      | NoAmplification   |
| tetA-02      | 7C |       |       |      | CurveFitFailed    |
| tetB-01      | 7C | 28.23 | 83.03 | 1.95 |                   |
| tetB-02      | 7C | 27.3  | 79.69 | 1.99 |                   |
| tetC-01      | 7C |       |       |      | NoAmplification   |
| tetC-02      | 7C | 28.04 | 76    | 2.01 |                   |
| tetD-01      | 7C |       |       |      | NoAmplification   |
| tetD-02      | 7C |       |       |      | NoAmplification   |
| tetE         | 7C |       |       |      | NoAmplification   |
| tetG-01      | 7C | 39.19 | 62.54 | 1.65 | MultipleMeltPeaks |
| tetG-02      | 7C |       |       |      | CurveFitFailed    |
| tetH         | 7C |       |       |      | NoAmplification   |
| tetJ         | 7C |       |       |      | NoAmplification   |
| tetK         | 7C |       |       |      | NoAmplification   |
| tetL-01      | 7C |       |       |      | NoAmplification   |
| tetL-02      | 7C | 37.61 | 90.2  | 1.84 | MultipleMeltPeaks |
| tetM-01      | 7C | 24.04 | 75.83 | 1.99 |                   |
| tetM-02      | 7C | 25.28 | 77.89 | 2.02 |                   |
| tetO-01      | 7C | 28.78 | 76.92 | 1.99 |                   |
| tetPA        | 7C |       |       |      | NoAmplification   |
| tetPB-01     | 7C |       |       |      | NoAmplification   |
| tetPB-02     | 7C | 33.84 | 85.03 | 1.96 |                   |
| tetPB-03     | 7C |       |       |      | NoAmplification   |
| tetPB-05     | 7C |       |       |      | NoAmplification   |
| tetQ         | 7C | 25.55 | 75.93 | 2.01 |                   |
| tetR-02      | 7C | 30.41 | 86.01 | 1.91 |                   |
| tetR-03      | 7C | 27.05 | 76.05 | 1.98 |                   |
| tetS         | 7C |       |       |      | NoAmplification   |

|             |    |       |       |      |                             |
|-------------|----|-------|-------|------|-----------------------------|
| tetT        | 7C |       |       |      | NoAmplification             |
| tetU-01     | 7C |       |       |      | NoAmplification             |
| tetV        | 7C |       |       |      | NoAmplification             |
| tetW-01     | 7C |       |       |      | NoAmplification             |
| tetX        | 7C |       |       |      | NoAmplification             |
| tnpA-01     | 7C |       |       |      | NoAmplification             |
| tnpA-02     | 7C |       |       |      | NoAmplification             |
| tnpA-03     | 7C |       |       |      | CurveFitFailed              |
| tnpA-04     | 7C | 32.01 | 74.91 | 1.89 | MultipleMeltPeaks           |
| tnpA-05     | 7C | 29.19 | 80.77 | 1.91 |                             |
| tnpA-07     | 7C |       |       |      | NoAmplification             |
| tolC-01     | 7C |       |       |      | NoAmplification             |
| tolC-02     | 7C | 34.63 | 90.43 | 1.86 |                             |
| tolC-03     | 7C | 37.9  | 75.25 | 1.99 | MultipleMeltPeaks           |
| Tp614       | 7C |       |       |      | NoAmplification             |
| ttgA        | 7C |       |       |      | CurveFitFailed              |
| ttgB        | 7C |       |       |      | NoAmplification             |
| vanA        | 7C |       |       |      | NoAmplification             |
| vanB-01     | 7C | 36.54 | 88    | 1.7  |                             |
| vanC-01     | 7C |       |       |      | NoAmplification             |
| vanC-02     | 7C |       |       |      | NoAmplification             |
| vanC-03     | 7C | 30.83 | 85.03 | 1.9  | MultipleMeltPeaks           |
| vanC1       | 7C |       |       |      | NoAmplification             |
| vanC2/vanC3 | 7C |       |       |      | CurveFitFailed              |
| vanG        | 7C |       |       |      | NoAmplification             |
| vanHB       | 7C |       |       |      | NoAmplification             |
| vanHD       | 7C |       |       |      | NoAmplification             |
| vanRA-01    | 7C |       |       |      | NoAmplification             |
| vanRA-02    | 7C |       |       |      | NoAmplification             |
| vanRB       | 7C |       |       |      | NoAmplification             |
| vanRC       | 7C |       |       |      | NoAmplification             |
| vanRC4      | 7C |       |       |      | NoAmplification             |
| vanRD       | 7C |       |       |      | NoAmplification             |
| vanSA       | 7C |       |       |      | NoAmplification             |
| vanSB       | 7C | 27.81 | 74.84 | 2.08 |                             |
| vanSC-01    | 7C | 37.6  | 78.27 | 1.84 | MultipleMeltPeaks           |
| vanSC-02    | 7C |       |       |      | NoAmplification             |
| vanTC-01    | 7C |       |       |      | NoAmplification             |
| vanTC-02    | 7C | 37.94 | 83.93 | 1.85 |                             |
| vanTE       | 7C |       |       |      | NoAmplification             |
| vanTG       | 7C | 35.03 | 74.38 | 1.94 |                             |
| vanWB       | 7C |       |       |      | NoAmplification             |
| vanWG       | 7C |       |       |      | NoAmplification             |
| vanXA       | 7C |       |       |      | LowEfficiency, CurveFitFail |
| vanXB       | 7C |       |       |      | NoAmplification             |
| vanXD       | 7C | 28.26 | 75.75 | 2.08 |                             |

|              |    |       |       |      |                   |
|--------------|----|-------|-------|------|-------------------|
| vanYB        | 7C |       |       |      | NoAmplification   |
| vanYD-01     | 7C | 34.34 | 81.6  | 1.83 |                   |
| vanYD-02     | 7C |       |       |      | NoAmplification   |
| vatB-01      | 7C |       |       |      | NoAmplification   |
| vatB-02      | 7C |       |       |      | NoAmplification   |
| vatC-01      | 7C |       |       |      | NoAmplification   |
| vatC-02      | 7C |       |       |      | CurveFitFailed    |
| vatE-01      | 7C | 26.94 | 77.16 | 2.09 |                   |
| vatE-02      | 7C |       |       |      | NoAmplification   |
| vgaA-01      | 7C |       |       |      | NoAmplification   |
| vgaA-02      | 7C |       |       |      | NoAmplification   |
| vgb-01       | 7C | 40.66 | 62.62 | 1.61 | MultipleMeltPeaks |
| vgbB-01      | 7C | 38.47 | 62.15 | 1.76 | MultipleMeltPeaks |
| vgbB-02      | 7C |       |       |      | NoAmplification   |
| yceE/mdtG-0  | 7C |       |       |      | NoAmplification   |
| yceE/mdtG-0  | 7C |       |       |      | NoAmplification   |
| yceL/mdtH-0  | 7C | 38.21 | 82.42 | 1.73 |                   |
| yceL/mdtH-0  | 7C |       |       |      | NoAmplification   |
| yceL/mdtH-0  | 7C |       |       |      | CurveFitFailed    |
| yidY/mdtL-01 | 7C | 32.85 | 90.24 | 1.8  |                   |
| yidY/mdtL-02 | 7C |       |       |      | CurveFitFailed    |































| Assay          | Sample | Ct    | Tm    | Efficiency | flag                         |
|----------------|--------|-------|-------|------------|------------------------------|
| 16S rRNA       | 8A     |       | 13.76 | 81.16      | 2.03                         |
| aac            | 8A     |       | 33.97 | 84.42      | 1.7 MultipleMeltPeaks        |
| aac(6')-Ib(akz | 8A     |       |       |            | LowEfficiency, CtIsSmall, S: |
| aac(6')-Ib(akz | 8A     | 41.5  | 79.21 | 1.8        |                              |
| aac(6')-Ib(akz | 8A     | 34.12 | 78.92 | 1.97       |                              |
| aac(6')-II     | 8A     | 36.63 | 81.16 | 1.77       | MultipleMeltPeaks            |
| aac(6')I1      | 8A     |       |       |            | NoAmplification              |
| aacA/aphD      | 8A     |       |       |            | LowEfficiency, CtIsSmall, S: |
| aacC           | 8A     |       |       |            | CurveFitFailed               |
| aacC1          | 8A     |       |       |            | NoAmplification              |
| aacC2          | 8A     |       |       |            | NoAmplification              |
| aacC4          | 8A     |       |       |            | NoAmplification              |
| aadA-01        | 8A     |       |       |            | LowEfficiency, CtIsSmall, S: |
| aadA-02        | 8A     |       |       |            | LowEfficiency, CtIsSmall, S: |
| aadA-1-01      | 8A     |       |       |            | NoAmplification              |
| aadA-1-02      | 8A     |       |       |            | LowEfficiency, CtIsSmall, S: |
| aadA1          | 8A     | 37.17 | 77.43 | 1.93       |                              |
| aadA2-01       | 8A     |       |       |            | LowEfficiency, CtIsSmall, C: |
| aadA2-02       | 8A     | 29.21 | 81.23 | 1.73       |                              |
| aadA2-03       | 8A     | 36.19 | 75.84 | 1.88       |                              |
| aadA5-01       | 8A     | 36.72 | 78.35 | 1.86       |                              |
| aadA5-02       | 8A     |       |       |            | NoAmplification              |
| aadA9-01       | 8A     |       |       |            | LowEfficiency, CtIsSmall, C: |
| aadA9-02       | 8A     |       |       |            | LowEfficiency, CtIsSmall, S: |
| aadD           | 8A     |       |       |            | LowEfficiency, CtIsSmall, S: |
| aadE           | 8A     |       |       |            | LowEfficiency, CtIsSmall, S: |
| acrA-01        | 8A     | 40.76 | 64.05 | 1.86       | MultipleMeltPeaks            |
| acrA-02        | 8A     |       |       |            | CurveFitFailed               |
| acrA-03        | 8A     |       |       |            | LowEfficiency, CtIsSmall, S: |
| acrA-04        | 8A     | 32.77 | 80.35 | 1.98       |                              |
| acrA-05        | 8A     | 30.69 | 85.5  | 1.98       | MultipleMeltPeaks            |
| acrB-01        | 8A     |       |       |            | NoAmplification              |
| acrF           | 8A     |       |       |            | CurveFitFailed               |
| acrR-01        | 8A     |       |       |            | NoAmplification              |
| acrR-02        | 8A     |       |       |            | CurveFitFailed               |
| Actin          | 8A     | 23.68 | 87.04 | 1.99       | MultipleMeltPeaks            |
| adeA           | 8A     |       |       |            | NoAmplification              |
| ampC-01        | 8A     | 33.59 | 80.13 | 1.99       |                              |
| ampC-02        | 8A     |       |       |            | LowEfficiency, CtIsSmall, S: |
| ampC-04        | 8A     | 32.25 | 78.5  | 1.78       |                              |
| ampC-05        | 8A     |       |       |            | NoAmplification              |
| ampC-06        | 8A     |       |       |            | LowEfficiency, CtIsSmall, S: |
| ampC-07        | 8A     |       |       |            | NoAmplification              |
| ampC-09        | 8A     |       |       |            | LowEfficiency, CtIsSmall, S: |
| ampC/blaDH     | 8A     | 30.15 | 76.77 | 2.02       | MultipleMeltPeaks            |

|                          |    |       |       |      |                              |
|--------------------------|----|-------|-------|------|------------------------------|
| aph                      | 8A |       |       |      | LowEfficiency, CtIsSmall, S: |
| aph(2')-Id-01            | 8A |       |       |      | LowEfficiency, CtIsSmall, S: |
| aph(2')-Id-02            | 8A |       |       |      | LowEfficiency, CtIsSmall, S: |
| aph6ia                   | 8A |       |       |      | LowEfficiency, CtIsSmall, S: |
| aphA1(aka k <sub>z</sub> | 8A | 27.63 | 76.69 | 2.06 |                              |
| bacA-01                  | 8A |       |       |      | LowEfficiency, CtIsSmall, S: |
| bacA-02                  | 8A |       |       |      | LowEfficiency, CtIsSmall, S: |
| BETA-globin              | 8A | 24.87 | 84.1  | 1.99 |                              |
| bla-ACC-1                | 8A |       |       |      | NoAmplification              |
| bla-L1                   | 8A | 33.91 | 85.02 | 1.96 |                              |
| bla1                     | 8A |       |       |      | LowEfficiency, CtIsSmall, S: |
| blaCMY                   | 8A |       |       |      | LowEfficiency, CtIsSmall, S: |
| blaCMY2-01               | 8A |       |       |      | NoAmplification              |
| blaCMY2-02               | 8A | 31.31 | 83.5  | 1.91 |                              |
| blaCTX-M-01              | 8A |       |       |      | NoAmplification              |
| blaCTX-M-02              | 8A |       |       |      | CurveFitFailed               |
| blaCTX-M-03              | 8A |       |       |      | CurveFitFailed               |
| blaCTX-M-04              | 8A |       |       |      | CurveFitFailed               |
| blaCTX-M-05              | 8A | 35.06 | 76    | 1.72 |                              |
| blaCTX-M-06              | 8A |       |       |      | NoAmplification              |
| blaGES                   | 8A |       |       |      | LowEfficiency, CtIsSmall, S: |
| blaIMP-01                | 8A |       |       |      | NoAmplification              |
| blaIMP-02                | 8A |       |       |      | LowEfficiency, CtIsSmall, S: |
| blaMOX/blaC              | 8A |       |       |      | NoAmplification              |
| blaOCH                   | 8A |       |       |      | NoAmplification              |
| blaOKP                   | 8A |       |       |      | NoAmplification              |
| blaOXA1/bla              | 8A |       |       |      | LowEfficiency, CtIsSmall, S: |
| blaOXA10-01              | 8A |       |       |      | LowEfficiency, CtIsSmall, S: |
| blaOXA10-02              | 8A |       |       |      | CurveFitFailed               |
| blaOXY                   | 8A |       |       |      | LowEfficiency, CtIsSmall, S: |
| blaPAO                   | 8A | 38.77 | 81.57 | 1.79 |                              |
| blaPER                   | 8A |       |       |      | LowEfficiency, CtIsSmall, S: |
| blaPSE                   | 8A |       |       |      | NoAmplification              |
| blaROB                   | 8A |       |       |      | NoAmplification              |
| blaSFO                   | 8A |       |       |      | LowEfficiency, CtIsSmall, S: |
| blaSHV-01                | 8A | 34.73 | 73.28 | 2.05 |                              |
| blaSHV-02                | 8A |       |       |      | CurveFitFailed               |
| blaTEM                   | 8A |       |       |      | NoAmplification              |
| blaTLA                   | 8A |       |       |      | LowEfficiency, CtIsSmall, S: |
| blaVEB                   | 8A |       |       |      | LowEfficiency, CtIsSmall, C: |
| blaVIM                   | 8A |       |       |      | NoAmplification              |
| blaZ                     | 8A |       |       |      | LowEfficiency, CtIsSmall, S: |
| carB                     | 8A |       |       |      | CurveFitFailed               |
| catA1                    | 8A |       |       |      | NoAmplification              |
| catB3                    | 8A | 35.92 | 80.01 | 1.9  |                              |
| catB8                    | 8A | 33.48 | 81.58 | 1.97 |                              |

|            |    |       |       |      |                              |
|------------|----|-------|-------|------|------------------------------|
| ceoA       | 8A | 35.48 | 82.52 | 1.86 |                              |
| cepA       | 8A |       |       |      | NoAmplification              |
| cfiA       | 8A | 36.65 | 76.44 | 1.68 | MultipleMeltPeaks            |
| cfr        | 8A |       |       |      | LowEfficiency, CtIsSmall, S: |
| cfxA       | 8A | 25.25 | 77.29 | 1.94 |                              |
| cmeA       | 8A |       |       |      | CurveFitFailed               |
| cmlA1-01   | 8A |       |       |      | LowEfficiency, CtIsSmall, S: |
| cmlA1-02   | 8A |       |       |      | CtIsLarge, CurveFitFailed    |
| cmr        | 8A |       |       |      | CurveFitFailed               |
| cmx(A)     | 8A | 27.77 | 86.68 | 2.06 |                              |
| cphA-01    | 8A | 32.89 | 89.49 | 1.73 |                              |
| cphA-02    | 8A | 29.89 | 78.2  | 1.97 |                              |
| dfrA1      | 8A |       |       |      | NoAmplification              |
| dfrA12     | 8A |       |       |      | CurveFitFailed               |
| emrD       | 8A |       |       |      | LowEfficiency, CtIsSmall, S: |
| ereA       | 8A |       |       |      | LowEfficiency, CtIsSmall, S: |
| ereB       | 8A |       |       |      | CurveFitFailed               |
| erm(34)    | 8A |       |       |      | NoAmplification              |
| erm(35)    | 8A |       |       |      | LowEfficiency, CtIsSmall, S: |
| erm(36)    | 8A | 39.31 | 79.84 | 1.67 |                              |
| ermA       | 8A |       |       |      | LowEfficiency, CtIsSmall, S: |
| ermA/ermTR | 8A |       |       |      | NoAmplification              |
| ermB       | 8A |       |       |      | LowEfficiency, CtIsSmall, S: |
| ermC       | 8A |       |       |      | LowEfficiency, CtIsSmall, S: |
| ermF       | 8A |       |       |      | LowEfficiency, CtIsSmall, S: |
| ermJ/ermD  | 8A |       |       |      | NoAmplification              |
| ermK-01    | 8A |       |       |      | LowEfficiency, CtIsSmall, S: |
| ermK-02    | 8A |       |       |      | NoAmplification              |
| ermT-01    | 8A |       |       |      | LowEfficiency, CtIsSmall, S: |
| ermT-02    | 8A |       |       |      | LowEfficiency, CtIsSmall, S: |
| ermX       | 8A | 27.34 | 83.61 | 1.89 |                              |
| ermY       | 8A |       |       |      | CurveFitFailed               |
| fabK       | 8A | 22.58 | 77.46 | 2.15 |                              |
| floR       | 8A | 30.21 | 82.89 | 1.93 |                              |
| folA       | 8A |       |       |      | NoAmplification              |
| fosB       | 8A |       |       |      | LowEfficiency, CtIsSmall, S: |
| fosX       | 8A |       |       |      | LowEfficiency, CtIsSmall, S: |
| fox5       | 8A | 30.37 | 85.83 | 1.93 | MultipleMeltPeaks            |
| imiR       | 8A |       |       |      | NoAmplification              |
| ImrA-01    | 8A |       |       |      | CurveFitFailed               |
| intl       | 8A | 36.39 | 84.33 | 1.87 |                              |
| intl1      | 8A | 22.02 | 83.83 | 2.09 | MultipleMeltPeaks            |
| IS613      | 8A | 25.75 | 79.71 | 1.85 |                              |
| lnuA-01    | 8A | 29.35 | 73.81 | 1.9  |                              |
| lnuB-01    | 8A |       |       |      | LowEfficiency, CtIsSmall, S: |
| lnuB-02    | 8A |       |       |      | LowEfficiency, CtIsSmall, S: |

|                |    |       |       |      |                              |
|----------------|----|-------|-------|------|------------------------------|
| lnuC           | 8A |       |       |      | CurveFitFailed               |
| marR-01        | 8A |       |       |      | LowEfficiency, CtIsSmall, S: |
| matA/mel       | 8A | 22.84 | 77.55 | 2.08 |                              |
| mdet1          | 8A |       |       |      | LowEfficiency, CtIsSmall, S: |
| mdtA           | 8A |       |       |      | LowEfficiency, CtIsSmall, S: |
| mdtE/yhiU      | 8A |       |       |      | CurveFitFailed               |
| mecA           | 8A |       |       |      | LowEfficiency, CtIsSmall, C: |
| mefA           | 8A | 22.09 | 80.55 | 2.02 |                              |
| mepA           | 8A | 33.53 | 84.88 | 1.98 |                              |
| mexA           | 8A |       |       |      | LowEfficiency, CtIsSmall, S: |
| mexD           | 8A | 40.03 | 79.69 | 1.93 |                              |
| mexE           | 8A |       |       |      | NoAmplification              |
| mexF           | 8A | 29.3  | 87.31 | 1.82 | MultipleMeltPeaks            |
| mphA-01        | 8A | 32.26 | 80.79 | 1.88 |                              |
| mphA-02        | 8A | 31.44 | 81.93 | 1.7  |                              |
| mphB           | 8A |       |       |      | LowEfficiency, CtIsSmall, S: |
| mphC           | 8A |       |       |      | LowEfficiency, CtIsSmall, S: |
| msrA-01        | 8A |       |       |      | LowEfficiency, CtIsSmall, S: |
| msrC-01        | 8A |       |       |      | NoAmplification              |
| mtrC-01        | 8A |       |       |      | LowEfficiency, CtIsSmall, S: |
| mtrC-02        | 8A |       |       |      | CurveFitFailed               |
| mtrD-02        | 8A | 28.04 | 81.41 | 2.01 |                              |
| mtrD-03        | 8A |       |       |      | CurveFitFailed               |
| NDM1           | 8A |       |       |      | LowEfficiency, CtIsSmall, C: |
| nimE           | 8A |       |       |      | LowEfficiency, CtIsSmall, S: |
| nisB           | 8A |       |       |      | NoAmplification              |
| oleC           | 8A |       |       |      | LowEfficiency, CtIsSmall, S: |
| oprD           | 8A | 32.17 | 81.71 | 2.01 | MultipleMeltPeaks            |
| oprJ           | 8A | 31.7  | 91.1  | 1.98 |                              |
| pbp            | 8A |       |       |      | LowEfficiency, CtIsSmall, S: |
| pbp2x          | 8A | 21.42 | 75.53 | 1.76 |                              |
| Pbp5           | 8A |       |       |      | LowEfficiency, CtIsSmall, S: |
| penA           | 8A |       |       |      | NoAmplification              |
| pikR1          | 8A |       |       |      | LowEfficiency, CtIsSmall, S: |
| pikR2          | 8A | 32.37 | 84.64 | 1.72 |                              |
| pmrA           | 8A | 22.09 | 79.61 | 2.08 |                              |
| pncA           | 8A | 33.91 | 80.67 | 1.91 | MultipleMeltPeaks            |
| putative multi | 8A |       |       |      | LowEfficiency, CtIsSmall, S: |
| qac            | 8A |       |       |      | LowEfficiency, CtIsSmall, S: |
| qacA           | 8A | 39.25 | 70.43 | 1.67 |                              |
| qacA/qacB      | 8A |       |       |      | NoAmplification              |
| qacEdelta1-0   | 8A |       |       |      | LowEfficiency, CtIsSmall, C: |
| qacEdelta1-0   | 8A |       |       |      | CurveFitFailed               |
| qacH-01        | 8A | 36.63 | 83.11 | 1.88 |                              |
| qacH-02        | 8A |       |       |      | LowEfficiency, CtIsSmall, C: |
| qnrA           | 8A |       |       |      | CurveFitFailed               |



|              |    |       |       |      |                                          |
|--------------|----|-------|-------|------|------------------------------------------|
| rarD-02      | 8A |       |       |      | NoAmplification                          |
| sat4         | 8A |       |       |      | LowEfficiency, CtIsSmall, S <sub>e</sub> |
| sdeB         | 8A |       |       |      | LowEfficiency, CtIsSmall, S <sub>e</sub> |
| spcN-01      | 8A |       |       |      | LowEfficiency, CtIsSmall, S <sub>e</sub> |
| speA         | 8A |       |       |      | NoAmplification                          |
| str          | 8A |       |       |      | LowEfficiency, CtIsSmall, S <sub>e</sub> |
| strA         | 8A |       |       |      | LowEfficiency, CtIsSmall, S <sub>e</sub> |
| strB         | 8A |       |       |      | LowEfficiency, CtIsSmall, S <sub>e</sub> |
| sul1         | 8A |       |       |      | NoAmplification                          |
| sul2         | 8A |       |       |      | LowEfficiency, CtIsSmall, S <sub>e</sub> |
| sulA/foIP-01 | 8A | 22.02 | 81.47 | 1.99 |                                          |
| sulA/foIP-03 | 8A | 21.05 | 83.11 | 1.99 |                                          |
| tet(32)      | 8A |       |       |      | LowEfficiency, CtIsSmall, S <sub>e</sub> |
| tet(34)      | 8A | 28.68 | 76.01 | 2.02 |                                          |
| tet(35)      | 8A |       |       |      | NoAmplification                          |
| tet(36)-A    | 8A |       |       |      | CurveFitFailed                           |
| tet(36)-B    | 8A |       |       |      | LowEfficiency, CtIsSmall, S <sub>e</sub> |
| tet(37)      | 8A | 28.57 | 76.32 | 1.99 |                                          |
| tetA-01      | 8A |       |       |      | NoAmplification                          |
| tetA-02      | 8A | 38.07 | 85.21 | 1.74 |                                          |
| tetB-01      | 8A |       |       |      | CurveFitFailed                           |
| tetB-02      | 8A |       |       |      | CurveFitFailed                           |
| tetC-01      | 8A |       |       |      | NoAmplification                          |
| tetC-02      | 8A |       |       |      | CurveFitFailed                           |
| tetD-01      | 8A |       |       |      | LowEfficiency, CtIsSmall, S <sub>e</sub> |
| tetD-02      | 8A |       |       |      | CurveFitFailed                           |
| tetE         | 8A | 38.14 | 77.64 | 1.87 | MultipleMeltPeaks                        |
| tetG-01      | 8A | 37.34 | 91.05 | 1.76 |                                          |
| tetG-02      | 8A | 31.31 | 83.83 | 1.98 |                                          |
| tetH         | 8A |       |       |      | LowEfficiency, CtIsSmall, S <sub>e</sub> |
| tetJ         | 8A |       |       |      | LowEfficiency, CtIsSmall, S <sub>e</sub> |
| tetK         | 8A |       |       |      | LowEfficiency, CtIsSmall, S <sub>e</sub> |
| tetL-01      | 8A |       |       |      | CurveFitFailed                           |
| tetL-02      | 8A | 28.18 | 78.67 | 2.04 |                                          |
| tetM-01      | 8A | 23.42 | 76.12 | 2.04 |                                          |
| tetM-02      | 8A | 23.85 | 77.49 | 2.06 |                                          |
| tetO-01      | 8A | 29.33 | 76.61 | 2.04 |                                          |
| tetPA        | 8A |       |       |      | NoAmplification                          |
| tetPB-01     | 8A |       |       |      | NoAmplification                          |
| tetPB-02     | 8A | 37.72 | 83.24 | 1.75 |                                          |
| tetPB-03     | 8A |       |       |      | LowEfficiency, CtIsSmall, S <sub>e</sub> |
| tetPB-05     | 8A |       |       |      | LowEfficiency, CtIsSmall, C <sub>i</sub> |
| tetQ         | 8A | 25.71 | 75.9  | 2.04 |                                          |
| tetR-02      | 8A | 31.07 | 88.87 | 1.94 | MultipleMeltPeaks                        |
| tetR-03      | 8A |       |       |      | LowEfficiency, CtIsSmall, C <sub>i</sub> |
| tetS         | 8A |       |       |      | CurveFitFailed                           |

|             |    |       |       |      |                              |
|-------------|----|-------|-------|------|------------------------------|
| tetT        | 8A | 29.55 | 74.72 | 2.11 |                              |
| tetU-01     | 8A |       |       |      | LowEfficiency, CtIsSmall, S: |
| tetV        | 8A |       |       |      | LowEfficiency, CtIsSmall, S: |
| tetW-01     | 8A | 28.49 | 81.22 | 2    |                              |
| tetX        | 8A |       |       |      | BadR2, LowEfficiency, CtIsS  |
| tnpA-01     | 8A | 38.11 | 79.65 | 1.87 |                              |
| tnpA-02     | 8A | 44.8  | 77.94 | 1.87 |                              |
| tnpA-03     | 8A |       |       |      | CurveFitFailed               |
| tnpA-04     | 8A |       |       |      | LowEfficiency, CtIsSmall, S: |
| tnpA-05     | 8A |       |       |      | LowEfficiency, CtIsSmall, S: |
| tnpA-07     | 8A |       |       |      | LowEfficiency, CtIsSmall, S: |
| tolC-01     | 8A |       |       |      | LowEfficiency, CtIsSmall, S: |
| tolC-02     | 8A | 30.01 | 83.5  | 1.99 |                              |
| tolC-03     | 8A | 34.36 | 81.6  | 1.93 |                              |
| Tp614       | 8A |       |       |      | LowEfficiency, CtIsSmall, S: |
| ttgA        | 8A |       |       |      | CurveFitFailed               |
| ttgB        | 8A |       |       |      | CurveFitFailed               |
| vanA        | 8A |       |       |      | LowEfficiency, CtIsSmall, Ci |
| vanB-01     | 8A | 29.87 | 79.69 | 1.73 |                              |
| vanC-01     | 8A | 39.71 | 72.43 | 1.96 |                              |
| vanC-02     | 8A |       |       |      | LowEfficiency, CtIsSmall, S: |
| vanC-03     | 8A | 28.71 | 86.09 | 1.96 |                              |
| vanC1       | 8A |       |       |      | LowEfficiency, CtIsSmall, Ci |
| vanC2/vanC3 | 8A | 31.29 | 82.8  | 1.9  |                              |
| vanG        | 8A |       |       |      | BadR2, LowEfficiency, CtIsS  |
| vanHB       | 8A |       |       |      | CurveFitFailed               |
| vanHD       | 8A |       |       |      | CurveFitFailed               |
| vanRA-01    | 8A |       |       |      | LowEfficiency, CtIsSmall, S: |
| vanRA-02    | 8A |       |       |      | NoAmplification              |
| vanRB       | 8A | 36.68 | 81.7  | 1.76 |                              |
| vanRC       | 8A |       |       |      | LowEfficiency, CtIsSmall, S: |
| vanRC4      | 8A |       |       |      | LowEfficiency, CtIsSmall, S: |
| vanRD       | 8A |       |       |      | NoAmplification              |
| vanSA       | 8A |       |       |      | LowEfficiency, CtIsSmall, S: |
| vanSB       | 8A | 27.47 | 74.71 | 2.04 |                              |
| vanSC-01    | 8A | 32    | 83.99 | 1.79 |                              |
| vanSC-02    | 8A |       |       |      | NoAmplification              |
| vanTC-01    | 8A |       |       |      | LowEfficiency, CtIsSmall, S: |
| vanTC-02    | 8A |       |       |      | NoAmplification              |
| vanTE       | 8A |       |       |      | NoAmplification              |
| vanTG       | 8A |       |       |      | NoAmplification              |
| vanWB       | 8A |       |       |      | LowEfficiency, CtIsSmall, S: |
| vanWG       | 8A | 40.96 | 74.24 | 1.75 |                              |
| vanXA       | 8A | 35.99 | 79.64 | 1.85 |                              |
| vanXB       | 8A |       |       |      | NoAmplification              |
| vanXD       | 8A | 28.51 | 75.7  | 2.08 |                              |

|              |    |       |       |      |                              |
|--------------|----|-------|-------|------|------------------------------|
| vanYB        | 8A | 35.95 | 81.01 | 1.89 | MultipleMeltPeaks            |
| vanYD-01     | 8A | 33.35 | 81.5  | 1.82 |                              |
| vanYD-02     | 8A |       |       |      | LowEfficiency, CtIsSmall, S: |
| vatB-01      | 8A |       |       |      | CurveFitFailed               |
| vatB-02      | 8A |       |       |      | CurveFitFailed               |
| vatC-01      | 8A |       |       |      | LowEfficiency, CtIsSmall, S: |
| vatC-02      | 8A |       |       |      | LowEfficiency, CtIsSmall, S: |
| vatE-01      | 8A | 29.65 | 76.27 | 2.03 |                              |
| vatE-02      | 8A |       |       |      | NoAmplification              |
| vgaA-01      | 8A |       |       |      | LowEfficiency, CtIsSmall, S: |
| vgaA-02      | 8A |       |       |      | CurveFitFailed               |
| vgb-01       | 8A | 35.88 | 76.44 | 1.92 |                              |
| vgbB-01      | 8A |       |       |      | LowEfficiency, CtIsSmall, C: |
| vgbB-02      | 8A |       |       |      | LowEfficiency, CtIsSmall, S: |
| yceE/mdtG-0  | 8A |       |       |      | LowEfficiency, CtIsSmall, S: |
| yceE/mdtG-0  | 8A | 39.1  | 81.12 | 1.78 |                              |
| yceL/mdtH-0  | 8A |       |       |      | CurveFitFailed               |
| yceL/mdtH-0  | 8A |       |       |      | LowEfficiency, CtIsSmall, S: |
| yceL/mdtH-0  | 8A |       |       |      | LowEfficiency, CtIsSmall, S: |
| yidY/mdtL-01 | 8A | 40.23 | 78.93 | 1.69 | MultipleMeltPeaks            |
| yidY/mdtL-02 | 8A |       |       |      | LowEfficiency, CtIsSmall, S: |































| Assay          | Sample | Ct    | Tm    | Efficiency | flag                            |
|----------------|--------|-------|-------|------------|---------------------------------|
| 16S rRNA       | 8B     |       | 14.44 | 81.11      | 2.1                             |
| aac            | 8B     |       | 28.5  | 81.99      | 1.86 SaturationBaselineRatiolsL |
| aac(6')-Ib(akz | 8B     |       |       |            | BadR2, LowEfficiency, CtIsS     |
| aac(6')-Ib(akz | 8B     | 29.5  | 86.07 | 2          |                                 |
| aac(6')-Ib(akz | 8B     | 31.79 | 78.83 | 1.87       | CtIsLarge                       |
| aac(6')-II     | 8B     |       |       |            | LowEfficiency, CtIsLarge, Ci    |
| aac(6')I1      | 8B     |       |       |            | LowEfficiency, CtIsSmall, S     |
| aacA/aphD      | 8B     |       |       |            | LowEfficiency, CtIsSmall, S     |
| aacC           | 8B     | 31.46 | 91.82 | 1.93       | CtIsLarge                       |
| aacC1          | 8B     |       |       |            | NoAmplification                 |
| aacC2          | 8B     |       |       |            | NoAmplification                 |
| aacC4          | 8B     | 33.75 | 89.59 | 1.71       | LowEfficiency, CtIsLarge, S     |
| aadA-01        | 8B     |       |       |            | LowEfficiency, CtIsSmall, Ci    |
| aadA-02        | 8B     |       |       |            | LowEfficiency, CtIsSmall, S     |
| aadA-1-01      | 8B     |       |       |            | NoAmplification                 |
| aadA-1-02      | 8B     |       |       |            | CurveFitFailed                  |
| aadA1          | 8B     | 32.36 | 84.21 | 2.06       | CtIsLarge                       |
| aadA2-01       | 8B     |       |       |            | LowEfficiency, CtIsSmall, Ci    |
| aadA2-02       | 8B     | 32.44 | 74.94 | 1.85       | CtIsLarge, SaturationBaseli     |
| aadA2-03       | 8B     |       |       |            | LowEfficiency, CtIsSmall, S     |
| aadA5-01       | 8B     |       |       |            | CtIsLarge, CurveFitFailed       |
| aadA5-02       | 8B     | 34.29 | 87    | 1.91       | CtIsLarge                       |
| aadA9-01       | 8B     |       |       |            | CurveFitFailed                  |
| aadA9-02       | 8B     |       |       |            | LowEfficiency, CtIsSmall, S     |
| aadD           | 8B     |       |       |            | LowEfficiency, CtIsSmall, Ci    |
| aadE           | 8B     |       |       |            | LowEfficiency, CtIsSmall, Ci    |
| acrA-01        | 8B     | 30.94 | 88.64 | 1.98       | CtIsLarge                       |
| acrA-02        | 8B     | 32.18 | 87.44 | 1.96       | CtIsLarge                       |
| acrA-03        | 8B     |       |       |            | LowEfficiency, CtIsLarge, Ci    |
| acrA-04        | 8B     | 29.58 | 80.45 | 1.97       | CtIsLarge                       |
| acrA-05        | 8B     | 30.66 | 88.47 | 1.97       | CtIsLarge                       |
| acrB-01        | 8B     |       |       |            | LowEfficiency, CtIsSmall, S     |
| acrF           | 8B     | 26.69 | 84.09 | 1.82       | SaturationBaselineRatiolsL      |
| acrR-01        | 8B     | 32.12 | 90.17 | 1.86       | CtIsLarge                       |
| acrR-02        | 8B     | 30.93 | 87.07 | 2          | CtIsLarge                       |
| Actin          | 8B     | 19.74 | 86.87 | 2.02       |                                 |
| adeA           | 8B     |       |       |            | CtIsLarge, CurveFitFailed       |
| ampC-01        | 8B     | 33.7  | 81.1  | 1.93       | CtIsLarge, MultipleMeltPe       |
| ampC-02        | 8B     | 30.97 | 89.84 | 1.99       | CtIsLarge                       |
| ampC-04        | 8B     | 31.88 | 86.46 | 1.51       | LowEfficiency, CtIsLarge, M     |
| ampC-05        | 8B     |       |       |            | LowEfficiency, CtIsSmall, Ci    |
| ampC-06        | 8B     |       |       |            | BadR2, LowEfficiency, CtIsS     |
| ampC-07        | 8B     | 32.11 | 81.05 | 1.95       | CtIsLarge                       |
| ampC-09        | 8B     |       |       |            | CurveFitFailed                  |
| ampC/blaDH     | 8B     | 29.11 | 86.99 | 1.98       |                                 |

|                          |    |       |       |      |                                          |
|--------------------------|----|-------|-------|------|------------------------------------------|
| aph                      | 8B |       |       |      | LowEfficiency, CtIsSmall, Ci             |
| aph(2')-Id-01            | 8B |       |       |      | LowEfficiency, CtIsSmall, Ci             |
| aph(2')-Id-02            | 8B |       |       |      | LowEfficiency, CtIsSmall, Ci             |
| aph6ia                   | 8B |       |       |      | CtIsLarge, CurveFitFailed                |
| aphA1(aka k <sub>z</sub> | 8B |       |       |      | LowEfficiency, CtIsSmall, Ci             |
| bacA-01                  | 8B |       |       |      | CtIsLarge, CurveFitFailed                |
| bacA-02                  | 8B | 33.96 | 87.55 | 1.91 | CtIsLarge, MultipleMeltPea               |
| BETA-globin              | 8B | 20.81 | 84.02 | 2.02 | SaturationBaselineRatiolsL               |
| bla-ACC-1                | 8B |       |       |      | CtIsLarge, CurveFitFailed                |
| bla-L1                   | 8B | 29.52 | 85.11 | 1.95 | CtIsLarge                                |
| bla1                     | 8B |       |       |      | CurveFitFailed                           |
| blaCMY                   | 8B |       |       |      | CtIsLarge, CurveFitFailed                |
| blaCMY2-01               | 8B |       |       |      | LowEfficiency, CtIsSmall, S <sub>e</sub> |
| blaCMY2-02               | 8B | 28.64 | 85.06 | 2.04 | MultipleMeltPeaks                        |
| blaCTX-M-01              | 8B |       |       |      | LowEfficiency, CtIsSmall, Ci             |
| blaCTX-M-02              | 8B |       |       |      | CurveFitFailed                           |
| blaCTX-M-03              | 8B |       |       |      | LowEfficiency, CtIsSmall, Ci             |
| blaCTX-M-04              | 8B |       |       |      | LowEfficiency, CtIsSmall, S <sub>e</sub> |
| blaCTX-M-05              | 8B |       |       |      | LowEfficiency, CtIsLarge, S <sub>e</sub> |
| blaCTX-M-06              | 8B |       |       |      | LowEfficiency, CtIsSmall, S <sub>e</sub> |
| blaGES                   | 8B |       |       |      | LowEfficiency, CtIsSmall, Ci             |
| blaIMP-01                | 8B |       |       |      | LowEfficiency, CtIsSmall, S <sub>e</sub> |
| blaIMP-02                | 8B | 32.91 | 83.01 | 1.96 | CtIsLarge                                |
| blaMOX/blaC              | 8B |       |       |      | LowEfficiency, CtIsSmall, S <sub>e</sub> |
| blaOCH                   | 8B |       |       |      | NoAmplification                          |
| blaOKP                   | 8B |       |       |      | NoAmplification                          |
| blaOXA1/blaC             | 8B |       |       |      | LowEfficiency, CtIsSmall, Ci             |
| blaOXA10-01              | 8B |       |       |      | LowEfficiency, CtIsSmall, Ci             |
| blaOXA10-02              | 8B |       |       |      | LowEfficiency, CtIsSmall, Ci             |
| blaOXY                   | 8B |       |       |      | LowEfficiency, CtIsLarge, Ci             |
| blaPAO                   | 8B |       |       |      | NoAmplification                          |
| blaPER                   | 8B |       |       |      | CtIsLarge, CurveFitFailed                |
| blaPSE                   | 8B |       |       |      | LowEfficiency, CtIsSmall, Ci             |
| blaROB                   | 8B |       |       |      | NoAmplification                          |
| blaSFO                   | 8B | 30.78 | 88.5  | 1.86 | CtIsLarge, MultipleMeltPea               |
| blaSHV-01                | 8B |       |       |      | LowEfficiency, CtIsSmall, S <sub>e</sub> |
| blaSHV-02                | 8B | 34.7  | 81.91 | 2    | CtIsLarge                                |
| blaTEM                   | 8B |       |       |      | NoAmplification                          |
| blaTLA                   | 8B |       |       |      | LowEfficiency, CtIsSmall, Ci             |
| blaVEB                   | 8B |       |       |      | CurveFitFailed                           |
| blaVIM                   | 8B |       |       |      | NoAmplification                          |
| blaZ                     | 8B |       |       |      | LowEfficiency, CtIsSmall, Ci             |
| carB                     | 8B |       |       |      | BadR2, LowEfficiency, CtIsS              |
| catA1                    | 8B |       |       |      | NoAmplification                          |
| catB3                    | 8B | 32.63 | 87.47 | 2.01 | CtIsLarge, MultipleMeltPea               |
| catB8                    | 8B | 28.25 | 82.63 | 2.04 |                                          |

|            |    |       |       |      |                             |
|------------|----|-------|-------|------|-----------------------------|
| ceoA       | 8B | 29.08 | 81.99 | 2.08 | SaturationBaselineRatiosL   |
| cepA       | 8B |       |       |      | LowEfficiency, CtIsSmall, S |
| cfiA       | 8B | 31.58 | 87.78 | 1.58 | LowEfficiency, CtIsLarge, S |
| cfr        | 8B |       |       |      | CtIsLarge, CurveFitFailed   |
| cfxA       | 8B | 23.68 | 77.23 | 1.83 |                             |
| cmeA       | 8B |       |       |      | CurveFitFailed              |
| cmlA1-01   | 8B |       |       |      | CtIsLarge, CurveFitFailed   |
| cmlA1-02   | 8B | 31.57 | 82.55 | 1.94 | CtIsLarge, MultipleMeltPea  |
| cmr        | 8B |       |       |      | LowEfficiency, CtIsSmall, S |
| cmx(A)     | 8B | 27.37 | 87.97 | 2.08 | MultipleMeltPeaks           |
| cphA-01    | 8B | 32.55 | 83.71 | 1.77 | LowEfficiency, CtIsLarge, M |
| cphA-02    | 8B | 34.55 | 82.29 | 1.95 | CtIsLarge                   |
| dfrA1      | 8B |       |       |      | LowEfficiency, CtIsLarge, C |
| dfrA12     | 8B |       |       |      | LowEfficiency, CtIsLarge, C |
| emrD       | 8B | 32.76 | 90.67 | 1.8  | LowEfficiency, CtIsLarge    |
| ereA       | 8B | 33.13 | 82.24 | 2.02 | CtIsLarge                   |
| ereB       | 8B |       |       |      | CtIsLarge, SaturationBaseli |
| erm(34)    | 8B |       |       |      | CtIsLarge, CurveFitFailed   |
| erm(35)    | 8B |       |       |      | LowEfficiency, CtIsSmall, C |
| erm(36)    | 8B | 33.28 | 87    | 2.02 | CtIsLarge, SaturationBaseli |
| ermA       | 8B |       |       |      | LowEfficiency, CtIsSmall, C |
| ermA/ermTR | 8B |       |       |      | CtIsLarge, CurveFitFailed   |
| ermB       | 8B |       |       |      | LowEfficiency, CtIsSmall, C |
| ermC       | 8B |       |       |      | LowEfficiency, CtIsSmall, S |
| ermF       | 8B |       |       |      | CurveFitFailed              |
| ermJ/ermD  | 8B |       |       |      | LowEfficiency, CtIsSmall, S |
| ermK-01    | 8B |       |       |      | CurveFitFailed              |
| ermK-02    | 8B |       |       |      | CtIsLarge, CurveFitFailed   |
| ermT-01    | 8B |       |       |      | LowEfficiency, CtIsSmall, S |
| ermT-02    | 8B |       |       |      | LowEfficiency, CtIsSmall, S |
| ermX       | 8B |       |       |      | LowEfficiency, CtIsLarge, C |
| ermY       | 8B | 34.69 | 84.02 | 1.94 | CtIsLarge, SaturationBaseli |
| fabK       | 8B | 25.83 | 79.61 | 2.03 |                             |
| floR       | 8B |       |       |      | NoAmplification             |
| folA       | 8B |       |       |      | NoAmplification             |
| fosB       | 8B |       |       |      | LowEfficiency, CtIsSmall, S |
| fosX       | 8B |       |       |      | LowEfficiency, CtIsSmall, C |
| fox5       | 8B | 28.75 | 86.11 | 1.85 |                             |
| imiR       | 8B |       |       |      | NoAmplification             |
| ImrA-01    | 8B |       |       |      | BadR2, LowEfficiency, CtIsS |
| intl       | 8B | 28.77 | 88.53 | 1.85 | MultipleMeltPeaks           |
| intl1      | 8B | 19.84 | 87.09 | 2.08 |                             |
| IS613      | 8B | 26.65 | 79.54 | 1.82 |                             |
| lnuA-01    | 8B |       |       |      | CurveFitFailed              |
| lnuB-01    | 8B |       |       |      | LowEfficiency, CtIsSmall, C |
| lnuB-02    | 8B |       |       |      | LowEfficiency, CtIsSmall, C |

|               |    |       |       |      |                               |
|---------------|----|-------|-------|------|-------------------------------|
| lnuC          | 8B | 31.79 | 87.27 | 1.83 | CtIsLarge                     |
| marR-01       | 8B | 30.43 | 85.23 | 1.95 | CtIsLarge                     |
| matA/mel      | 8B | 25.41 | 76.85 | 2.03 | MultipleMeltPeaks             |
| mdet1         | 8B |       |       |      | LowEfficiency, CtIsSmall, Ci  |
| mdtA          | 8B |       |       |      | LowEfficiency, CtIsLarge, Ci  |
| mdtE/yhiU     | 8B | 33.36 | 92.08 | 1.95 | CtIsLarge                     |
| mecA          | 8B |       |       |      | LowEfficiency, CtIsSmall, Ci  |
| mefA          | 8B | 25.49 | 80.3  | 1.97 |                               |
| mepA          | 8B | 31.73 | 84.42 | 1.97 | CtIsLarge, MultipleMeltPeaks  |
| mexA          | 8B |       |       |      | LowEfficiency, CtIsSmall, Ci  |
| mexD          | 8B | 31.02 | 80.22 | 2.03 | CtIsLarge                     |
| mexE          | 8B |       |       |      | CtIsLarge, CurveFitFailed     |
| mexF          | 8B | 28.02 | 88.14 | 1.81 | SaturationBaselineRatiolsL    |
| mphA-01       | 8B | 28.81 | 88.88 | 2.1  |                               |
| mphA-02       | 8B |       |       |      | LowEfficiency, CurveFitFailed |
| mphB          | 8B |       |       |      | CtIsLarge, CurveFitFailed     |
| mphC          | 8B |       |       |      | LowEfficiency, CtIsSmall, Ci  |
| msrA-01       | 8B |       |       |      | LowEfficiency, CtIsSmall, Ci  |
| msrC-01       | 8B |       |       |      | NoAmplification               |
| mtrC-01       | 8B |       |       |      | LowEfficiency, CtIsSmall, Ci  |
| mtrC-02       | 8B | 34.74 | 84.24 | 1.97 | CtIsLarge                     |
| mtrD-02       | 8B | 28.09 | 81.16 | 1.93 |                               |
| mtrD-03       | 8B | 34.06 | 85.3  | 1.92 | CtIsLarge                     |
| NDM1          | 8B |       |       |      | LowEfficiency, CtIsSmall, S   |
| nimE          | 8B |       |       |      | LowEfficiency, CtIsSmall, Ci  |
| nisB          | 8B |       |       |      | CtIsLarge, CurveFitFailed     |
| oleC          | 8B |       |       |      | LowEfficiency, CtIsSmall, Ci  |
| oprD          | 8B | 27.92 | 86.57 | 2.12 | MultipleMeltPeaks             |
| oprJ          | 8B |       |       |      | CtIsLarge, SaturationBaseli   |
| pbp           | 8B |       |       |      | LowEfficiency, CtIsSmall, S   |
| pbp2x         | 8B | 27.89 | 75.31 | 2.04 | SaturationBaselineRatiolsL    |
| Pbp5          | 8B |       |       |      | LowEfficiency, CtIsSmall, Ci  |
| penA          | 8B |       |       |      | LowEfficiency, CtIsLarge, Ci  |
| pikR1         | 8B |       |       |      | CtIsLarge, CurveFitFailed     |
| pikR2         | 8B | 31.03 | 85.03 | 2    | CtIsLarge, SaturationBaseli   |
| pmrA          | 8B | 25.49 | 78.96 | 1.98 |                               |
| pncA          | 8B | 34.46 | 89.33 | 2.02 | CtIsLarge, SaturationBaseli   |
| putative mult | 8B |       |       |      | CtIsLarge, CurveFitFailed     |
| qac           | 8B | 31.59 | 78.87 | 1.99 | CtIsLarge                     |
| qacA          | 8B |       |       |      | LowEfficiency, CtIsSmall, S   |
| qacA/qacB     | 8B |       |       |      | LowEfficiency, CtIsSmall, Ci  |
| qacEdelta1-0  | 8B |       |       |      | LowEfficiency, CtIsSmall, Ci  |
| qacEdelta1-0  | 8B | 30.67 | 76.15 | 1.92 | CtIsLarge, MultipleMeltPeaks  |
| qacH-01       | 8B | 31.95 | 86.59 | 1.78 | LowEfficiency, CtIsLarge, M   |
| qacH-02       | 8B | 34.23 | 83.72 | 1.67 | LowEfficiency, CtIsLarge      |
| qnrA          | 8B |       |       |      | CtIsLarge, CurveFitFailed     |

|              |    |       |       |      |                              |
|--------------|----|-------|-------|------|------------------------------|
| rarD-02      | 8B | 34.2  | 85.04 | 1.93 | CtIsLarge, SaturationBaseli  |
| sat4         | 8B |       |       |      | LowEfficiency, CtIsSmall, S  |
| sdeB         | 8B |       |       |      | LowEfficiency, CtIsSmall, Ci |
| spcN-01      | 8B |       |       |      | CtIsLarge, CurveFitFailed    |
| speA         | 8B |       |       |      | LowEfficiency, CtIsSmall, Ci |
| str          | 8B |       |       |      | LowEfficiency, CtIsSmall, Ci |
| strA         | 8B |       |       |      | LowEfficiency, CtIsSmall, Ci |
| strB         | 8B |       |       |      | LowEfficiency, CtIsSmall, Ci |
| sul1         | 8B |       |       |      | LowEfficiency, CtIsLarge, S  |
| sul2         | 8B |       |       |      | LowEfficiency, CtIsSmall, Ci |
| sulA/foIP-01 | 8B | 23.82 | 81.14 | 2.05 |                              |
| sulA/foIP-03 | 8B | 24.74 | 83.42 | 1.99 |                              |
| tet(32)      | 8B | 30.96 | 86.94 | 1.8  | LowEfficiency, CtIsLarge     |
| tet(34)      | 8B | 32.2  | 75.24 | 1.85 | CtIsLarge                    |
| tet(35)      | 8B | 28.7  | 77.09 | 1.99 | SaturationBaselineRatiolsL   |
| tet(36)-A    | 8B |       |       |      | LowEfficiency, CtIsSmall, Ci |
| tet(36)-B    | 8B |       |       |      | BadR2, LowEfficiency, CtIsS  |
| tet(37)      | 8B | 27.73 | 86.13 | 1.98 |                              |
| tetA-01      | 8B | 25.23 | 83.15 | 1.95 | SaturationBaselineRatiolsL   |
| tetA-02      | 8B | 33.47 | 90.79 | 1.88 | CtIsLarge                    |
| tetB-01      | 8B | 32.03 | 86.08 | 1.93 | CtIsLarge                    |
| tetB-02      | 8B |       |       |      | LowEfficiency, CtIsLarge, Ci |
| tetC-01      | 8B |       |       |      | NoAmplification              |
| tetC-02      | 8B |       |       |      | LowEfficiency, CtIsSmall, Ci |
| tetD-01      | 8B |       |       |      | LowEfficiency, CtIsSmall, Ci |
| tetD-02      | 8B |       |       |      | LowEfficiency, CtIsSmall, Ci |
| tetE         | 8B |       |       |      | LowEfficiency, CtIsSmall, Ci |
| tetG-01      | 8B |       |       |      | LowEfficiency, CtIsSmall, Ci |
| tetG-02      | 8B |       |       |      | LowEfficiency, CtIsSmall, Ci |
| tetH         | 8B |       |       |      | LowEfficiency, CtIsSmall, S  |
| tetJ         | 8B |       |       |      | LowEfficiency, CtIsSmall, Ci |
| tetK         | 8B |       |       |      | CurveFitFailed               |
| tetL-01      | 8B |       |       |      | LowEfficiency, CtIsSmall, Ci |
| tetL-02      | 8B |       |       |      | LowEfficiency, CtIsSmall, Ci |
| tetM-01      | 8B |       |       |      | LowEfficiency, CtIsSmall, Ci |
| tetM-02      | 8B | 24.74 | 77.32 | 2    |                              |
| tetO-01      | 8B | 26.82 | 76.46 | 2.09 |                              |
| tetPA        | 8B |       |       |      | LowEfficiency, CtIsSmall, S  |
| tetPB-01     | 8B |       |       |      | LowEfficiency, CtIsSmall, Ci |
| tetPB-02     | 8B | 28.76 | 84.66 | 2.08 |                              |
| tetPB-03     | 8B |       |       |      | LowEfficiency, CtIsSmall, S  |
| tetPB-05     | 8B |       |       |      | LowEfficiency, CtIsSmall, S  |
| tetQ         | 8B | 25.38 | 75.82 | 2.05 |                              |
| tetR-02      | 8B | 30.27 | 90.31 | 1.84 | CtIsLarge, MultipleMeltPe    |
| tetR-03      | 8B |       |       |      | LowEfficiency, CtIsSmall, Ci |
| tetS         | 8B | 34.46 | 85.07 | 2.01 | CtIsLarge, SaturationBaseli  |

|             |    |       |       |      |                                          |
|-------------|----|-------|-------|------|------------------------------------------|
| tetT        | 8B |       |       |      | LowEfficiency, CtIsSmall, Ci             |
| tetU-01     | 8B |       |       |      | LowEfficiency, CtIsSmall, S <sub>c</sub> |
| tetV        | 8B |       |       |      | LowEfficiency, CtIsSmall, Ci             |
| tetW-01     | 8B | 28.85 | 81.52 | 2.03 |                                          |
| tetX        | 8B | 29.28 | 75.43 | 2.08 |                                          |
| tnpA-01     | 8B |       |       |      | CurveFitFailed                           |
| tnpA-02     | 8B |       |       |      | LowEfficiency, CtIsLarge, Ci             |
| tnpA-03     | 8B | 34.99 | 74.97 | 2.06 | CtIsLarge                                |
| tnpA-04     | 8B |       |       |      | LowEfficiency, CtIsSmall, Ci             |
| tnpA-05     | 8B |       |       |      | LowEfficiency, CtIsLarge, Ci             |
| tnpA-07     | 8B |       |       |      | LowEfficiency, CtIsSmall, Ci             |
| tolC-01     | 8B |       |       |      | LowEfficiency, CtIsLarge, Ci             |
| tolC-02     | 8B | 29.44 | 84.38 | 2.01 |                                          |
| tolC-03     | 8B | 30.28 | 87.01 | 1.97 | CtIsLarge, MultipleMeltPea               |
| Tp614       | 8B | 30.78 | 83.41 | 1.99 | CtIsLarge                                |
| ttgA        | 8B |       |       |      | CurveFitFailed                           |
| ttgB        | 8B | 32.75 | 84.51 | 2.01 | CtIsLarge                                |
| vanA        | 8B |       |       |      | CurveFitFailed                           |
| vanB-01     | 8B | 30.35 | 85.27 | 2.03 | CtIsLarge, SaturationBaseli              |
| vanC-01     | 8B |       |       |      | LowEfficiency, CtIsSmall, Ci             |
| vanC-02     | 8B |       |       |      | LowEfficiency, CtIsSmall, Ci             |
| vanC-03     | 8B | 25.74 | 86.22 | 2    |                                          |
| vanC1       | 8B |       |       |      | LowEfficiency, CtIsSmall, Ci             |
| vanC2/vanC3 | 8B | 29.77 | 86.96 | 2.1  | CtIsLarge, SaturationBaseli              |
| vanG        | 8B |       |       |      | CurveFitFailed                           |
| vanHB       | 8B |       |       |      | LowEfficiency, CtIsSmall, Ci             |
| vanHD       | 8B | 30.93 | 85.52 | 1.92 | CtIsLarge                                |
| vanRA-01    | 8B |       |       |      | LowEfficiency, CtIsSmall, Ci             |
| vanRA-02    | 8B |       |       |      | CurveFitFailed                           |
| vanRB       | 8B | 32.95 | 87.1  | 2.04 | CtIsLarge, SaturationBaseli              |
| vanRC       | 8B |       |       |      | LowEfficiency, CtIsSmall, Ci             |
| vanRC4      | 8B |       |       |      | LowEfficiency, CtIsSmall, Ci             |
| vanRD       | 8B |       |       |      | BadR2, LowEfficiency, CtIsS              |
| vanSA       | 8B |       |       |      | LowEfficiency, CtIsSmall, S <sub>c</sub> |
| vanSB       | 8B | 31.19 | 73.96 | 1.91 | CtIsLarge                                |
| vanSC-01    | 8B | 32.82 | 83.73 | 1.85 | CtIsLarge                                |
| vanSC-02    | 8B |       |       |      | NoAmplification                          |
| vanTC-01    | 8B |       |       |      | LowEfficiency, CtIsSmall, S <sub>c</sub> |
| vanTC-02    | 8B |       |       |      | LowEfficiency, CtIsSmall, S <sub>c</sub> |
| vanTE       | 8B |       |       |      | LowEfficiency, CtIsSmall, S <sub>c</sub> |
| vanTG       | 8B |       |       |      | LowEfficiency, CtIsSmall, Ci             |
| vanWB       | 8B |       |       |      | LowEfficiency, CtIsSmall, Ci             |
| vanWG       | 8B |       |       |      | CtIsLarge, CurveFitFailed                |
| vanXA       | 8B |       |       |      | LowEfficiency, CtIsSmall, S <sub>c</sub> |
| vanXB       | 8B |       |       |      | NoAmplification                          |
| vanXD       | 8B | 29.99 | 74.88 | 2.03 | CtIsLarge                                |

|              |    |       |       |      |                              |
|--------------|----|-------|-------|------|------------------------------|
| vanYB        | 8B | 31.39 | 84.44 | 1.91 | CtIsLarge                    |
| vanYD-01     | 8B | 31.4  | 81.68 | 1.75 | LowEfficiency, CtIsLarge, Sa |
| vanYD-02     | 8B |       |       |      | CtIsLarge, CurveFitFailed    |
| vatB-01      | 8B |       |       |      | BadR2, LowEfficiency, CtIsS  |
| vatB-02      | 8B |       |       |      | BadR2, LowEfficiency, CtIsS  |
| vatC-01      | 8B |       |       |      | CtIsLarge, CurveFitFailed    |
| vatC-02      | 8B |       |       |      | LowEfficiency, CtIsLarge, Ci |
| vatE-01      | 8B | 32.06 | 76.85 | 1.99 | CtIsLarge, SaturationBaseli  |
| vatE-02      | 8B |       |       |      | NoAmplification              |
| vgaA-01      | 8B |       |       |      | CtIsLarge, CurveFitFailed    |
| vgaA-02      | 8B |       |       |      | CurveFitFailed               |
| vgb-01       | 8B |       |       |      | CurveFitFailed               |
| vgbB-01      | 8B |       |       |      | LowEfficiency, CtIsSmall, Sa |
| vgbB-02      | 8B |       |       |      | CurveFitFailed               |
| yceE/mdtG-0  | 8B |       |       |      | CurveFitFailed               |
| yceE/mdtG-0  | 8B | 32.25 | 81.49 | 2.04 | CtIsLarge                    |
| yceL/mdtH-0  | 8B | 29.57 | 88.79 | 1.98 | CtIsLarge                    |
| yceL/mdtH-0  | 8B |       |       |      | LowEfficiency, CtIsSmall, Ci |
| yceL/mdtH-0  | 8B | 34.99 | 90.42 | 1.91 | CtIsLarge                    |
| yidY/mdtL-01 | 8B | 30.12 | 84.38 | 1.97 | CtIsLarge, MultipleMeltPea   |
| yidY/mdtL-02 | 8B |       |       |      | LowEfficiency, CtIsSmall, Ci |































| Assay           | Sample | Ct | Tm    | Efficiency | flag                         |
|-----------------|--------|----|-------|------------|------------------------------|
| 16S rRNA        | 8C     |    | 12.78 | 80.94      | 1.95                         |
| aac             | 8C     |    | 33.77 | 81.5       | 1.73                         |
| aac(6')-Ib(akz) | 8C     |    |       |            | CurveFitFailed               |
| aac(6')-Ib(akz) | 8C     |    | 33.77 | 80.26      | 1.96 MultipleMeltPeaks       |
| aac(6')-Ib(akz) | 8C     |    | 36.86 | 77.61      | 1.8                          |
| aac(6')-II      | 8C     |    | 36.67 | 88.78      | 1.67                         |
| aac(6')I1       | 8C     |    |       |            | LowEfficiency, CtIsSmall, S: |
| aacA/aphD       | 8C     |    |       |            | LowEfficiency, CtIsSmall, S: |
| aacC            | 8C     |    | 34.75 | 87.82      | 1.91                         |
| aacC1           | 8C     |    |       |            | CurveFitFailed               |
| aacC2           | 8C     |    |       |            | LowEfficiency, CtIsSmall, S: |
| aacC4           | 8C     |    | 35.99 | 89.29      | 1.79                         |
| aadA-01         | 8C     |    |       |            | LowEfficiency, CtIsSmall, S: |
| aadA-02         | 8C     |    |       |            | LowEfficiency, CtIsSmall, S: |
| aadA-1-01       | 8C     |    |       |            | LowEfficiency, CtIsSmall, S: |
| aadA-1-02       | 8C     |    |       |            | CurveFitFailed               |
| aadA1           | 8C     |    |       |            | CurveFitFailed               |
| aadA2-01        | 8C     |    |       |            | LowEfficiency, CtIsSmall, S: |
| aadA2-02        | 8C     |    | 29.63 | 75.42      | 1.99                         |
| aadA2-03        | 8C     |    |       |            | LowEfficiency, CtIsSmall, S: |
| aadA5-01        | 8C     |    | 31.28 | 78.53      | 1.98                         |
| aadA5-02        | 8C     |    | 33.21 | 83.16      | 1.93 MultipleMeltPeaks       |
| aadA9-01        | 8C     |    |       |            | CurveFitFailed               |
| aadA9-02        | 8C     |    |       |            | LowEfficiency, CtIsSmall, S: |
| aadD            | 8C     |    |       |            | LowEfficiency, CtIsSmall, S: |
| aadE            | 8C     |    |       |            | LowEfficiency, CtIsSmall, S: |
| acrA-01         | 8C     |    | 30.7  | 85.21      | 2.04                         |
| acrA-02         | 8C     |    |       |            | CurveFitFailed               |
| acrA-03         | 8C     |    | 37.78 | 88.69      | 1.64                         |
| acrA-04         | 8C     |    | 30.51 | 80.46      | 1.97                         |
| acrA-05         | 8C     |    | 32.09 | 85.82      | 1.87 MultipleMeltPeaks       |
| acrB-01         | 8C     |    |       |            | LowEfficiency, CtIsSmall, S: |
| acrF            | 8C     |    |       |            | CurveFitFailed               |
| acrR-01         | 8C     |    |       |            | CurveFitFailed               |
| acrR-02         | 8C     |    | 30.97 | 79.96      | 1.95                         |
| Actin           | 8C     |    | 22.64 | 83.53      | 2.01 MultipleMeltPeaks       |
| adeA            | 8C     |    |       |            | LowEfficiency, CtIsSmall, S: |
| ampC-01         | 8C     |    | 34.21 | 78.52      | 1.94                         |
| ampC-02         | 8C     |    |       |            | LowEfficiency, CtIsSmall, S: |
| ampC-04         | 8C     |    | 32.72 | 78.63      | 1.79 MultipleMeltPeaks       |
| ampC-05         | 8C     |    |       |            | CurveFitFailed               |
| ampC-06         | 8C     |    |       |            | LowEfficiency, CtIsSmall, S: |
| ampC-07         | 8C     |    |       |            | LowEfficiency, CtIsSmall, S: |
| ampC-09         | 8C     |    |       |            | LowEfficiency, CtIsSmall, S: |
| ampC/blaDH      | 8C     |    | 31.49 | 82.71      | 2.01                         |

|                          |    |       |       |      |                                          |
|--------------------------|----|-------|-------|------|------------------------------------------|
| aph                      | 8C |       |       |      | LowEfficiency, CtIsSmall, S <sub>e</sub> |
| aph(2')-Id-01            | 8C |       |       |      | LowEfficiency, CtIsSmall, S <sub>e</sub> |
| aph(2')-Id-02            | 8C |       |       |      | LowEfficiency, CtIsSmall, S <sub>e</sub> |
| aph6ia                   | 8C |       |       |      | LowEfficiency, CtIsSmall, S <sub>e</sub> |
| aphA1(aka k <sub>z</sub> | 8C |       |       |      | CurveFitFailed                           |
| bacA-01                  | 8C |       |       |      | CurveFitFailed                           |
| bacA-02                  | 8C |       |       |      | CurveFitFailed                           |
| BETA-globin              | 8C | 23.81 | 83.98 | 1.99 |                                          |
| bla-ACC-1                | 8C |       |       |      | LowEfficiency, CtIsSmall, S <sub>e</sub> |
| bla-L1                   | 8C | 32.07 | 84.29 | 1.99 | MultipleMeltPeaks                        |
| bla1                     | 8C |       |       |      | LowEfficiency, CtIsSmall, S <sub>e</sub> |
| blaCMY                   | 8C |       |       |      | CurveFitFailed                           |
| blaCMY2-01               | 8C | 31.14 | 78.54 | 2.08 |                                          |
| blaCMY2-02               | 8C | 30.48 | 81.53 | 1.97 | MultipleMeltPeaks                        |
| blaCTX-M-01              | 8C |       |       |      | CurveFitFailed                           |
| blaCTX-M-02              | 8C | 32.31 | 89.54 | 1.85 |                                          |
| blaCTX-M-03              | 8C |       |       |      | LowEfficiency, CtIsSmall, S <sub>e</sub> |
| blaCTX-M-04              | 8C | 32.85 | 88.01 | 1.95 |                                          |
| blaCTX-M-05              | 8C | 32.91 | 76.4  | 1.79 |                                          |
| blaCTX-M-06              | 8C |       |       |      | LowEfficiency, CtIsSmall, S <sub>e</sub> |
| blaGES                   | 8C |       |       |      | LowEfficiency, CtIsSmall, S <sub>e</sub> |
| blaIMP-01                | 8C |       |       |      | LowEfficiency, CtIsSmall, S <sub>e</sub> |
| blaIMP-02                | 8C |       |       |      | CurveFitFailed                           |
| blaMOX/blaC              | 8C |       |       |      | CurveFitFailed                           |
| blaOCH                   | 8C |       |       |      | NoAmplification                          |
| blaOKP                   | 8C |       |       |      | NoAmplification                          |
| blaOXA1/bla              | 8C |       |       |      | LowEfficiency, CtIsSmall, S <sub>e</sub> |
| blaOXA10-01              | 8C |       |       |      | LowEfficiency, CtIsSmall, S <sub>e</sub> |
| blaOXA10-02              | 8C |       |       |      | CurveFitFailed                           |
| blaOXY                   | 8C |       |       |      | CurveFitFailed                           |
| blaPAO                   | 8C |       |       |      | CurveFitFailed                           |
| blaPER                   | 8C |       |       |      | CurveFitFailed                           |
| blaPSE                   | 8C |       |       |      | LowEfficiency, CtIsSmall, S <sub>e</sub> |
| blaROB                   | 8C |       |       |      | LowEfficiency, CtIsSmall, S <sub>e</sub> |
| blaSFO                   | 8C |       |       |      | CurveFitFailed                           |
| blaSHV-01                | 8C |       |       |      | LowEfficiency, CtIsSmall, S <sub>e</sub> |
| blaSHV-02                | 8C |       |       |      | LowEfficiency, CtIsSmall, S <sub>e</sub> |
| blaTEM                   | 8C | 24.39 | 79.43 | 1.78 |                                          |
| blaTLA                   | 8C |       |       |      | LowEfficiency, CtIsSmall, S <sub>e</sub> |
| blaVEB                   | 8C |       |       |      | LowEfficiency, CtIsSmall, C <sub>i</sub> |
| blaVIM                   | 8C |       |       |      | LowEfficiency, CtIsSmall, S <sub>e</sub> |
| blaZ                     | 8C |       |       |      | LowEfficiency, CtIsSmall, C <sub>i</sub> |
| carB                     | 8C |       |       |      | LowEfficiency, CtIsSmall, S <sub>e</sub> |
| catA1                    | 8C |       |       |      | NoAmplification                          |
| catB3                    | 8C |       |       |      | CurveFitFailed                           |
| catB8                    | 8C | 33.39 | 82.64 | 1.89 |                                          |

|            |    |       |       |      |                              |
|------------|----|-------|-------|------|------------------------------|
| ceoA       | 8C | 33.37 | 80.02 | 1.88 |                              |
| cepA       | 8C |       |       |      | LowEfficiency, CtIsSmall, S: |
| cfiA       | 8C | 30.37 | 84.4  | 1.8  |                              |
| cfr        | 8C |       |       |      | LowEfficiency, CtIsSmall, S: |
| cfxA       | 8C | 23.6  | 77.32 | 2.04 |                              |
| cmeA       | 8C |       |       |      | LowEfficiency, CtIsSmall, S: |
| cmlA1-01   | 8C |       |       |      | LowEfficiency, CtIsSmall, S: |
| cmlA1-02   | 8C |       |       |      | LowEfficiency, CtIsSmall, S: |
| cmr        | 8C |       |       |      | CurveFitFailed               |
| cmx(A)     | 8C | 30.36 | 79.67 | 2.03 | MultipleMeltPeaks            |
| cphA-01    | 8C | 35.61 | 89.47 | 1.8  |                              |
| cphA-02    | 8C |       |       |      | CurveFitFailed               |
| dfrA1      | 8C |       |       |      | LowEfficiency, CtIsSmall, S: |
| dfrA12     | 8C |       |       |      | LowEfficiency, CtIsSmall, S: |
| emrD       | 8C |       |       |      | CurveFitFailed               |
| ereA       | 8C |       |       |      | CurveFitFailed               |
| ereB       | 8C |       |       |      | CurveFitFailed               |
| erm(34)    | 8C |       |       |      | LowEfficiency, CtIsSmall, S: |
| erm(35)    | 8C |       |       |      | LowEfficiency, CtIsSmall, S: |
| erm(36)    | 8C |       |       |      | LowEfficiency, CtIsSmall, S: |
| ermA       | 8C |       |       |      | LowEfficiency, CtIsSmall, S: |
| ermA/ermTR | 8C |       |       |      | NoAmplification              |
| ermB       | 8C | 27.22 | 74.7  | 1.8  |                              |
| ermC       | 8C |       |       |      | LowEfficiency, CtIsSmall, S: |
| ermF       | 8C |       |       |      | CurveFitFailed               |
| ermJ/ermD  | 8C |       |       |      | LowEfficiency, CtIsSmall, S: |
| ermK-01    | 8C |       |       |      | CurveFitFailed               |
| ermK-02    | 8C |       |       |      | CurveFitFailed               |
| ermT-01    | 8C |       |       |      | LowEfficiency, CtIsSmall, S: |
| ermT-02    | 8C |       |       |      | LowEfficiency, CtIsSmall, S: |
| ermX       | 8C |       |       |      | CurveFitFailed               |
| ermY       | 8C |       |       |      | CurveFitFailed               |
| fabK       | 8C | 20.13 | 77.36 | 2.11 |                              |
| floR       | 8C |       |       |      | LowEfficiency, CtIsSmall, S: |
| folA       | 8C |       |       |      | NoAmplification              |
| fosB       | 8C |       |       |      | LowEfficiency, CtIsSmall, S: |
| fosX       | 8C |       |       |      | LowEfficiency, CtIsSmall, S: |
| fox5       | 8C | 28.51 | 89.25 | 1.95 | MultipleMeltPeaks            |
| imiR       | 8C |       |       |      | LowEfficiency, CtIsSmall, S: |
| ImrA-01    | 8C | 33.63 | 82.65 | 1.92 |                              |
| intl       | 8C |       |       |      | CurveFitFailed               |
| intl1      | 8C | 21.97 | 83.74 | 2.25 |                              |
| IS613      | 8C | 24.96 | 79.85 | 1.69 |                              |
| lnuA-01    | 8C |       |       |      | CurveFitFailed               |
| lnuB-01    | 8C |       |       |      | LowEfficiency, CtIsSmall, S: |
| lnuB-02    | 8C |       |       |      | LowEfficiency, CtIsSmall, S: |

|               |    |       |       |      |                              |
|---------------|----|-------|-------|------|------------------------------|
| lnuC          | 8C |       |       |      | LowEfficiency, CtIsSmall, S: |
| marR-01       | 8C |       |       |      | CurveFitFailed               |
| matA/mel      | 8C | 21.08 | 77.47 | 2.08 |                              |
| mdet1         | 8C |       |       |      | CurveFitFailed               |
| mdtA          | 8C |       |       |      | LowEfficiency, CtIsSmall, S: |
| mdtE/yhiU     | 8C | 35.41 | 88.03 | 1.8  |                              |
| mecA          | 8C |       |       |      | LowEfficiency, CtIsSmall, S: |
| mefA          | 8C | 20.83 | 80.44 | 1.99 |                              |
| mepA          | 8C | 31.96 | 86.87 | 2.03 |                              |
| mexA          | 8C |       |       |      | CurveFitFailed               |
| mexD          | 8C | 33.39 | 79.93 | 2.01 |                              |
| mexE          | 8C |       |       |      | LowEfficiency, CtIsSmall, S: |
| mexF          | 8C | 30.79 | 87.57 | 1.98 |                              |
| mphA-01       | 8C |       |       |      | CurveFitFailed               |
| mphA-02       | 8C | 32.66 | 82.46 | 1.5  |                              |
| mphB          | 8C |       |       |      | CurveFitFailed               |
| mphC          | 8C |       |       |      | LowEfficiency, CtIsSmall, S: |
| msrA-01       | 8C |       |       |      | CurveFitFailed               |
| msrC-01       | 8C |       |       |      | LowEfficiency, CtIsSmall, S: |
| mtrC-01       | 8C |       |       |      | LowEfficiency, CtIsSmall, S: |
| mtrC-02       | 8C |       |       |      | LowEfficiency, CtIsSmall, S: |
| mtrD-02       | 8C | 25.76 | 81.47 | 1.95 |                              |
| mtrD-03       | 8C |       |       |      | CurveFitFailed               |
| NDM1          | 8C |       |       |      | LowEfficiency, CtIsSmall, S: |
| nimE          | 8C |       |       |      | CurveFitFailed               |
| nisB          | 8C |       |       |      | LowEfficiency, CtIsSmall, S: |
| oleC          | 8C |       |       |      | CurveFitFailed               |
| oprD          | 8C | 30.72 | 86.89 | 1.97 |                              |
| oprJ          | 8C | 32.27 | 82.35 | 1.72 |                              |
| pbp           | 8C |       |       |      | CurveFitFailed               |
| pbp2x         | 8C | 20    | 75.65 | 1.87 |                              |
| Pbp5          | 8C |       |       |      | LowEfficiency, CtIsSmall, S: |
| penA          | 8C | 35.96 | 87.67 | 1.76 |                              |
| pikR1         | 8C |       |       |      | LowEfficiency, CtIsSmall, S: |
| pikR2         | 8C |       |       |      | NoAmplification              |
| pmrA          | 8C | 20.16 | 79.75 | 2.03 |                              |
| pncA          | 8C | 28.84 | 89.45 | 1.9  |                              |
| putative mult | 8C |       |       |      | CurveFitFailed               |
| qac           | 8C |       |       |      | CurveFitFailed               |
| qacA          | 8C |       |       |      | LowEfficiency, CtIsSmall, S: |
| qacA/qacB     | 8C |       |       |      | LowEfficiency, CtIsSmall, S: |
| qacEdelta1-0  | 8C |       |       |      | LowEfficiency, CtIsSmall, S: |
| qacEdelta1-0  | 8C |       |       |      | CurveFitFailed               |
| qacH-01       | 8C |       |       |      | CurveFitFailed               |
| qacH-02       | 8C |       |       |      | CurveFitFailed               |
| qnrA          | 8C | 34.61 | 73.89 | 2.02 |                              |



|              |    |       |       |      |                              |
|--------------|----|-------|-------|------|------------------------------|
| rarD-02      | 8C | 34.98 | 83.48 | 1.97 |                              |
| sat4         | 8C |       |       |      | CurveFitFailed               |
| sdeB         | 8C |       |       |      | NoAmplification              |
| spcN-01      | 8C |       |       |      | LowEfficiency, CtIsSmall, S: |
| speA         | 8C |       |       |      | LowEfficiency, CtIsSmall, S: |
| str          | 8C | 29.35 | 72.36 | 2    |                              |
| strA         | 8C |       |       |      | CurveFitFailed               |
| strB         | 8C |       |       |      | CurveFitFailed               |
| sul1         | 8C |       |       |      | NoAmplification              |
| sul2         | 8C |       |       |      | CurveFitFailed               |
| sulA/foIP-01 | 8C | 19.37 | 81.49 | 1.93 |                              |
| sulA/foIP-03 | 8C | 19.21 | 83.08 | 1.81 |                              |
| tet(32)      | 8C |       |       |      | LowEfficiency, CtIsSmall, S: |
| tet(34)      | 8C | 29.63 | 75.67 | 1.87 |                              |
| tet(35)      | 8C |       |       |      | LowEfficiency, CtIsSmall, S: |
| tet(36)-A    | 8C |       |       |      | LowEfficiency, CtIsSmall, S: |
| tet(36)-B    | 8C |       |       |      | LowEfficiency, CtIsSmall, S: |
| tet(37)      | 8C | 26.59 | 76.26 | 1.89 |                              |
| tetA-01      | 8C |       |       |      | LowEfficiency, CtIsSmall, S: |
| tetA-02      | 8C |       |       |      | CurveFitFailed               |
| tetB-01      | 8C |       |       |      | CurveFitFailed               |
| tetB-02      | 8C |       |       |      | CurveFitFailed               |
| tetC-01      | 8C |       |       |      | NoAmplification              |
| tetC-02      | 8C |       |       |      | CurveFitFailed               |
| tetD-01      | 8C |       |       |      | CurveFitFailed               |
| tetD-02      | 8C | 31.65 | 77.7  | 1.96 |                              |
| tetE         | 8C |       |       |      | CurveFitFailed               |
| tetG-01      | 8C |       |       |      | CurveFitFailed               |
| tetG-02      | 8C | 34.47 | 87.25 | 1.86 |                              |
| tetH         | 8C |       |       |      | LowEfficiency, CtIsSmall, S: |
| tetJ         | 8C |       |       |      | LowEfficiency, CtIsSmall, S: |
| tetK         | 8C |       |       |      | LowEfficiency, CtIsSmall, S: |
| tetL-01      | 8C |       |       |      | LowEfficiency, CtIsSmall, S: |
| tetL-02      | 8C |       |       |      | LowEfficiency, CtIsSmall, S: |
| tetM-01      | 8C | 24.05 | 75.9  | 1.98 |                              |
| tetM-02      | 8C | 24.41 | 77.47 | 2    |                              |
| tetO-01      | 8C | 28.29 | 76.52 | 2.02 |                              |
| tetPA        | 8C |       |       |      | LowEfficiency, CtIsSmall, S: |
| tetPB-01     | 8C |       |       |      | CurveFitFailed               |
| tetPB-02     | 8C | 32.12 | 84.48 | 2.19 |                              |
| tetPB-03     | 8C |       |       |      | CurveFitFailed               |
| tetPB-05     | 8C |       |       |      | CurveFitFailed               |
| tetQ         | 8C | 24.19 | 75.93 | 2.02 |                              |
| tetR-02      | 8C | 32.16 | 86.02 | 1.85 |                              |
| tetR-03      | 8C |       |       |      | LowEfficiency, CtIsSmall, S: |
| tetS         | 8C |       |       |      | CurveFitFailed               |

|             |    |       |       |      |                              |
|-------------|----|-------|-------|------|------------------------------|
| tetT        | 8C |       |       |      | LowEfficiency, CtIsSmall, S: |
| tetU-01     | 8C |       |       |      | LowEfficiency, CtIsSmall, S: |
| tetV        | 8C |       |       |      | CurveFitFailed               |
| tetW-01     | 8C | 26.29 | 81.64 | 1.96 |                              |
| tetX        | 8C |       |       |      | BadR2, CtIsSmall, Saturatio  |
| tnpA-01     | 8C |       |       |      | LowEfficiency, CtIsSmall, S: |
| tnpA-02     | 8C |       |       |      | LowEfficiency, CtIsSmall, S: |
| tnpA-03     | 8C |       |       |      | LowEfficiency, CtIsSmall, S: |
| tnpA-04     | 8C |       |       |      | LowEfficiency, CtIsSmall, S: |
| tnpA-05     | 8C |       |       |      | CurveFitFailed               |
| tnpA-07     | 8C |       |       |      | LowEfficiency, CtIsSmall, S: |
| tolC-01     | 8C |       |       |      | CurveFitFailed               |
| tolC-02     | 8C | 33.44 | 77.17 | 1.92 | MultipleMeltPeaks            |
| tolC-03     | 8C | 31.89 | 83.45 | 2.05 |                              |
| Tp614       | 8C |       |       |      | CurveFitFailed               |
| ttgA        | 8C |       |       |      | LowEfficiency, CtIsSmall, S: |
| ttgB        | 8C |       |       |      | LowEfficiency, CtIsSmall, C: |
| vanA        | 8C |       |       |      | CurveFitFailed               |
| vanB-01     | 8C | 33.11 | 83.22 | 2.01 | MultipleMeltPeaks            |
| vanC-01     | 8C |       |       |      | CurveFitFailed               |
| vanC-02     | 8C |       |       |      | LowEfficiency, CtIsSmall, S: |
| vanC-03     | 8C | 29.36 | 85.9  | 1.94 |                              |
| vanC1       | 8C |       |       |      | LowEfficiency, CtIsSmall, S: |
| vanC2/vanC3 | 8C | 31.45 | 82.74 | 1.86 |                              |
| vanG        | 8C |       |       |      | CurveFitFailed               |
| vanHB       | 8C |       |       |      | CurveFitFailed               |
| vanHD       | 8C |       |       |      | CurveFitFailed               |
| vanRA-01    | 8C |       |       |      | LowEfficiency, CtIsSmall, S: |
| vanRA-02    | 8C |       |       |      | LowEfficiency, CtIsSmall, C: |
| vanRB       | 8C |       |       |      | CurveFitFailed               |
| vanRC       | 8C |       |       |      | CurveFitFailed               |
| vanRC4      | 8C |       |       |      | LowEfficiency, CtIsSmall, C: |
| vanRD       | 8C |       |       |      | LowEfficiency, CtIsSmall, C: |
| vanSA       | 8C |       |       |      | CurveFitFailed               |
| vanSB       | 8C | 28.44 | 74.46 | 2.01 |                              |
| vanSC-01    | 8C | 36.33 | 83.95 | 1.84 |                              |
| vanSC-02    | 8C |       |       |      | NoAmplification              |
| vanTC-01    | 8C |       |       |      | CurveFitFailed               |
| vanTC-02    | 8C |       |       |      | CurveFitFailed               |
| vanTE       | 8C |       |       |      | CurveFitFailed               |
| vanTG       | 8C |       |       |      | LowEfficiency, CtIsSmall, C: |
| vanWB       | 8C |       |       |      | CurveFitFailed               |
| vanWG       | 8C |       |       |      | LowEfficiency, CtIsSmall, S: |
| vanXA       | 8C |       |       |      | CurveFitFailed               |
| vanXB       | 8C | 29.64 | 76.68 | 1.97 |                              |
| vanXD       | 8C | 29.96 | 75.06 | 2    |                              |

|              |    |       |       |      |                              |
|--------------|----|-------|-------|------|------------------------------|
| vanYB        | 8C |       |       |      | CurveFitFailed               |
| vanYD-01     | 8C | 31.65 | 81.28 | 1.83 | MultipleMeltPeaks            |
| vanYD-02     | 8C |       |       |      | CurveFitFailed               |
| vatB-01      | 8C | 33.4  | 74.71 | 2    |                              |
| vatB-02      | 8C | 33.27 | 86.3  | 2.03 |                              |
| vatC-01      | 8C |       |       |      | LowEfficiency, CtIsSmall, S: |
| vatC-02      | 8C |       |       |      | LowEfficiency, CtIsSmall, S: |
| vatE-01      | 8C | 31.89 | 77.07 | 2.04 |                              |
| vatE-02      | 8C |       |       |      | NoAmplification              |
| vgaA-01      | 8C |       |       |      | LowEfficiency, CtIsSmall, C: |
| vgaA-02      | 8C |       |       |      | CurveFitFailed               |
| vgb-01       | 8C |       |       |      | CurveFitFailed               |
| vgbB-01      | 8C |       |       |      | CurveFitFailed               |
| vgbB-02      | 8C |       |       |      | CurveFitFailed               |
| yceE/mdtG-0  | 8C |       |       |      | CurveFitFailed               |
| yceE/mdtG-0  | 8C |       |       |      | NoAmplification              |
| yceL/mdtH-0  | 8C | 32.85 | 87.26 | 1.85 |                              |
| yceL/mdtH-0  | 8C |       |       |      | CurveFitFailed               |
| yceL/mdtH-0  | 8C |       |       |      | CurveFitFailed               |
| yidY/mdtL-01 | 8C | 36.79 | 81.28 | 1.77 | MultipleMeltPeaks            |
| yidY/mdtL-02 | 8C |       |       |      | LowEfficiency, CtIsSmall, S: |































| Assay          | Sample | Ct | Tm    | Efficiency | flag                         |
|----------------|--------|----|-------|------------|------------------------------|
| 16S rRNA       | 9A     |    | 12.05 | 82.06      | 1.92                         |
| aac            | 9A     |    | 32.23 | 88.46      | 1.52 MultipleMeltPeaks       |
| aac(6')-Ib(akz | 9A     |    |       |            | NoAmplification              |
| aac(6')-Ib(akz | 9A     |    | 37.45 | 82.04      | 1.81 MultipleMeltPeaks       |
| aac(6')-Ib(akz | 9A     |    | 30.36 | 79.58      | 1.99                         |
| aac(6')-II     | 9A     |    | 33.71 | 82.04      | 1.91 MultipleMeltPeaks       |
| aac(6')I1      | 9A     |    | 34.5  | 87.96      | 1.82                         |
| aacA/aphD      | 9A     |    | 27.02 | 71.28      | 2.03                         |
| aacC           | 9A     |    | 33.38 | 86.88      | 1.86                         |
| aacC1          | 9A     |    | 33.02 | 92.17      | 1.83 MultipleMeltPeaks       |
| aacC2          | 9A     |    |       |            | NoAmplification              |
| aacC4          | 9A     |    | 32.93 | 91.21      | 1.81                         |
| aadA-01        | 9A     |    |       |            | LowEfficiency, CtIsSmall, S: |
| aadA-02        | 9A     |    |       |            | NoAmplification              |
| aadA-1-01      | 9A     |    |       |            | NoAmplification              |
| aadA-1-02      | 9A     |    |       |            | NoAmplification              |
| aadA1          | 9A     |    |       |            | LowEfficiency, CtIsSmall, C: |
| aadA2-01       | 9A     |    |       |            | CurveFitFailed               |
| aadA2-02       | 9A     |    |       |            | NoAmplification              |
| aadA2-03       | 9A     |    | 35.19 | 77.82      | 1.88 MultipleMeltPeaks       |
| aadA5-01       | 9A     |    | 31.85 | 78.48      | 1.99                         |
| aadA5-02       | 9A     |    | 29.39 | 82.49      | 1.92                         |
| aadA9-01       | 9A     |    | 38.47 | 83.81      | 1.76                         |
| aadA9-02       | 9A     |    | 34.26 | 77.87      | 1.99                         |
| aadD           | 9A     |    | 29.21 | 80.82      | 1.95                         |
| aadE           | 9A     |    |       |            | NoAmplification              |
| acrA-01        | 9A     |    | 23.75 | 83.03      | 1.98                         |
| acrA-02        | 9A     |    | 34.25 | 87.54      | 1.89                         |
| acrA-03        | 9A     |    |       |            | CurveFitFailed               |
| acrA-04        | 9A     |    | 32.36 | 88.55      | 1.95 MultipleMeltPeaks       |
| acrA-05        | 9A     |    | 27.97 | 89.24      | 1.95 MultipleMeltPeaks       |
| acrB-01        | 9A     |    | 31.04 | 86.23      | 2.03 MultipleMeltPeaks       |
| acrF           | 9A     |    |       |            | LowEfficiency, CtIsSmall, S: |
| acrR-01        | 9A     |    | 32.01 | 80.44      | 1.71 MultipleMeltPeaks       |
| acrR-02        | 9A     |    | 34.69 | 89.12      | 1.9 MultipleMeltPeaks        |
| Actin          | 9A     |    | 23.08 | 83.33      | 1.86 MultipleMeltPeaks       |
| adeA           | 9A     |    |       |            | CurveFitFailed               |
| ampC-01        | 9A     |    | 31.68 | 80.41      | 2.01                         |
| ampC-02        | 9A     |    | 35.63 | 88.51      | 1.94 MultipleMeltPeaks       |
| ampC-04        | 9A     |    | 34.87 | 88.96      | 1.56 MultipleMeltPeaks       |
| ampC-05        | 9A     |    |       |            | NoAmplification              |
| ampC-06        | 9A     |    | 32.38 | 72.44      | 1.68                         |
| ampC-07        | 9A     |    |       |            | CurveFitFailed               |
| ampC-09        | 9A     |    |       |            | CurveFitFailed               |
| ampC/blaDH     | 9A     |    | 36.59 | 77.2       | 1.81                         |

|                          |    |       |       |      |                                          |
|--------------------------|----|-------|-------|------|------------------------------------------|
| aph                      | 9A |       |       |      | LowEfficiency, CtIsSmall, Ci             |
| aph(2')-Id-01            | 9A |       |       |      | CurveFitFailed                           |
| aph(2')-Id-02            | 9A |       |       |      | CurveFitFailed                           |
| aph6ia                   | 9A | 33.53 | 77.69 | 1.99 | MultipleMeltPeaks                        |
| aphA1(aka k <sub>z</sub> | 9A |       |       |      | CurveFitFailed                           |
| bacA-01                  | 9A | 36.15 | 90.33 | 1.73 |                                          |
| bacA-02                  | 9A | 34.63 | 74.46 | 2.03 |                                          |
| BETA-globin              | 9A | 24.52 | 84.13 | 1.96 |                                          |
| bla-ACC-1                | 9A | 40.64 | 87.34 | 1.7  | MultipleMeltPeaks                        |
| bla-L1                   | 9A | 35.72 | 80.53 | 1.79 |                                          |
| bla1                     | 9A |       |       |      | LowEfficiency, CtIsSmall, Ci             |
| blaCMY                   | 9A | 29.71 | 80.26 | 1.94 |                                          |
| blaCMY2-01               | 9A | 34.22 | 75.14 | 2.06 |                                          |
| blaCMY2-02               | 9A | 34.94 | 81.98 | 1.79 | MultipleMeltPeaks                        |
| blaCTX-M-01              | 9A | 34.37 | 85.99 | 1.6  | MultipleMeltPeaks                        |
| blaCTX-M-02              | 9A |       |       |      | CurveFitFailed                           |
| blaCTX-M-03              | 9A |       |       |      | CurveFitFailed                           |
| blaCTX-M-04              | 9A | 30.65 | 80.42 | 1.58 | MultipleMeltPeaks                        |
| blaCTX-M-05              | 9A | 39.03 | 74.81 | 1.55 |                                          |
| blaCTX-M-06              | 9A |       |       |      | NoAmplification                          |
| blaGES                   | 9A |       |       |      | NoAmplification                          |
| blaIMP-01                | 9A |       |       |      | NoAmplification                          |
| blaIMP-02                | 9A |       |       |      | CurveFitFailed                           |
| blaMOX/blaC              | 9A |       |       |      | NoAmplification                          |
| blaOCH                   | 9A |       |       |      | NoAmplification                          |
| blaOKP                   | 9A |       |       |      | NoAmplification                          |
| blaOXA1/blaC             | 9A |       |       |      | CurveFitFailed                           |
| blaOXA10-01              | 9A |       |       |      | LowEfficiency, CtIsSmall, S <sub>c</sub> |
| blaOXA10-02              | 9A |       |       |      | LowEfficiency, CtIsSmall, S <sub>c</sub> |
| blaOXY                   | 9A |       |       |      | LowEfficiency, CtIsSmall, Ci             |
| blaPAO                   | 9A |       |       |      | CurveFitFailed                           |
| blaPER                   | 9A |       |       |      | LowEfficiency, CtIsSmall, S <sub>c</sub> |
| blaPSE                   | 9A |       |       |      | NoAmplification                          |
| blaROB                   | 9A |       |       |      | NoAmplification                          |
| blaSFO                   | 9A | 35.64 | 89.48 | 1.75 |                                          |
| blaSHV-01                | 9A |       |       |      | CurveFitFailed                           |
| blaSHV-02                | 9A |       |       |      | NoAmplification                          |
| blaTEM                   | 9A | 35.4  | 87.05 | 1.66 | MultipleMeltPeaks                        |
| blaTLA                   | 9A |       |       |      | NoAmplification                          |
| blaVEB                   | 9A |       |       |      | NoAmplification                          |
| blaVIM                   | 9A |       |       |      | NoAmplification                          |
| blaZ                     | 9A |       |       |      | CurveFitFailed                           |
| carB                     | 9A | 33.63 | 87.02 | 1.99 |                                          |
| catA1                    | 9A |       |       |      | NoAmplification                          |
| catB3                    | 9A |       |       |      | CurveFitFailed                           |
| catB8                    | 9A |       |       |      | CurveFitFailed                           |

|            |    |       |       |      |                              |
|------------|----|-------|-------|------|------------------------------|
| ceoA       | 9A | 33.05 | 75.47 | 1.91 | MultipleMeltPeaks            |
| cepA       | 9A |       |       |      | NoAmplification              |
| cfiA       | 9A | 32.59 | 82.91 | 1.86 |                              |
| cfr        | 9A |       |       |      | LowEfficiency, CtIsSmall, S: |
| cfxA       | 9A | 16.44 | 77.46 | 1.85 |                              |
| cmeA       | 9A |       |       |      | LowEfficiency, CtIsSmall, Ct |
| cmlA1-01   | 9A | 34.54 | 90.44 | 1.94 |                              |
| cmlA1-02   | 9A | 32.39 | 88.49 | 1.98 | MultipleMeltPeaks            |
| cmr        | 9A |       |       |      | LowEfficiency, CtIsSmall, Ct |
| cmx(A)     | 9A | 30.54 | 84.34 | 1.87 |                              |
| cphA-01    | 9A | 26.53 | 89.46 | 1.91 |                              |
| cphA-02    | 9A | 38.78 | 78.8  | 1.62 |                              |
| dfrA1      | 9A |       |       |      | NoAmplification              |
| dfrA12     | 9A | 38.32 | 87.23 | 1.8  |                              |
| emrD       | 9A |       |       |      | CurveFitFailed               |
| ereA       | 9A |       |       |      | CurveFitFailed               |
| ereB       | 9A | 33.72 | 87.42 | 2.05 |                              |
| erm(34)    | 9A | 33.06 | 89.86 | 1.91 |                              |
| erm(35)    | 9A |       |       |      | LowEfficiency, CtIsSmall, Ct |
| erm(36)    | 9A | 30.23 | 80.82 | 1.85 |                              |
| ermA       | 9A | 31.56 | 74.51 | 1.95 |                              |
| ermA/ermTR | 9A | 21.86 | 75.97 | 2.08 |                              |
| ermB       | 9A | 16.68 | 74.95 | 1.97 |                              |
| ermC       | 9A | 28.69 | 75.55 | 1.98 |                              |
| ermF       | 9A | 15.82 | 74.57 | 2.07 |                              |
| ermJ/ermD  | 9A | 30.86 | 74.06 | 2.02 |                              |
| ermK-01    | 9A |       |       |      | NoAmplification              |
| ermK-02    | 9A | 29.97 | 77.68 | 1.93 |                              |
| ermT-01    | 9A |       |       |      | LowEfficiency, CtIsSmall, S: |
| ermT-02    | 9A |       |       |      | LowEfficiency, CtIsSmall, S: |
| ermX       | 9A | 15.13 | 83.65 | 1.99 |                              |
| ermY       | 9A |       |       |      | NoAmplification              |
| fabK       | 9A | 22.31 | 79.7  | 2.22 |                              |
| floR       | 9A | 38.37 | 83.21 | 1.71 |                              |
| folA       | 9A |       |       |      | NoAmplification              |
| fosB       | 9A |       |       |      | LowEfficiency, CtIsSmall, S: |
| fosX       | 9A |       |       |      | LowEfficiency, CtIsSmall, S: |
| fox5       | 9A | 25.26 | 90.71 | 1.9  | MultipleMeltPeaks            |
| imiR       | 9A |       |       |      | NoAmplification              |
| ImrA-01    | 9A |       |       |      | BadR2, LowEfficiency, CtIsS  |
| intl       | 9A | 31.66 | 79.91 | 1.84 |                              |
| intl1      | 9A | 21.65 | 87.73 | 1.93 |                              |
| IS613      | 9A | 18.81 | 79.59 | 1.86 |                              |
| lnuA-01    | 9A |       |       |      | LowEfficiency, CtIsSmall, S: |
| lnuB-01    | 9A |       |       |      | LowEfficiency, CtIsSmall, S: |
| lnuB-02    | 9A |       |       |      | CurveFitFailed               |

|                |    |       |       |      |                              |
|----------------|----|-------|-------|------|------------------------------|
| lnuC           | 9A | 31.46 | 88.53 | 1.72 |                              |
| marR-01        | 9A | 34.63 | 89.66 | 1.79 | MultipleMeltPeaks            |
| matA/mel       | 9A | 14.6  | 77.75 | 2.1  |                              |
| mdet1          | 9A |       |       |      | NoAmplification              |
| mdtA           | 9A | 36.23 | 79.92 | 1.74 |                              |
| mdtE/yhiU      | 9A | 32.15 | 88.87 | 1.93 | MultipleMeltPeaks            |
| mecA           | 9A | 27.86 | 74.44 | 1.74 |                              |
| mefA           | 9A | 13.9  | 80.52 | 2.06 |                              |
| mepA           | 9A | 28.97 | 87.81 | 1.85 |                              |
| mexA           | 9A | 32.87 | 89.43 | 1.95 | MultipleMeltPeaks            |
| mexD           | 9A | 42.24 | 79.85 | 1.83 |                              |
| mexE           | 9A | 29.2  | 87.56 | 1.87 |                              |
| mexF           | 9A | 24.75 | 84.8  | 1.8  | MultipleMeltPeaks            |
| mphA-01        | 9A | 26.86 | 89.52 | 1.98 |                              |
| mphA-02        | 9A | 24.81 | 85.3  | 1.68 | MultipleMeltPeaks            |
| mphB           | 9A |       |       |      | CtIsLarge, CurveFitFailed    |
| mphC           | 9A |       |       |      | CurveFitFailed               |
| msrA-01        | 9A | 28.31 | 76.6  | 2.05 |                              |
| msrC-01        | 9A |       |       |      | NoAmplification              |
| mtrC-01        | 9A | 35.82 | 86.29 | 1.97 |                              |
| mtrC-02        | 9A | 34.56 | 87.91 | 1.93 | MultipleMeltPeaks            |
| mtrD-02        | 9A | 31.88 | 80.94 | 1.98 |                              |
| mtrD-03        | 9A | 31.15 | 82.22 | 1.97 |                              |
| NDM1           | 9A | 35.87 | 89.21 | 1.87 |                              |
| nimE           | 9A |       |       |      | NoAmplification              |
| nisB           | 9A | 31.56 | 82.22 | 1.98 |                              |
| oleC           | 9A | 33.85 | 88.72 | 1.91 | MultipleMeltPeaks            |
| oprD           | 9A | 31.11 | 87.33 | 1.94 | MultipleMeltPeaks            |
| oprJ           | 9A | 30.19 | 91.09 | 1.93 |                              |
| pbp            | 9A | 38.54 | 81.06 | 1.9  |                              |
| pbp2x          | 9A | 23.35 | 75.07 | 1.87 |                              |
| Pbp5           | 9A |       |       |      | LowEfficiency, CtIsSmall, Ci |
| penA           | 9A | 36.01 | 88.36 | 1.74 |                              |
| pikR1          | 9A | 33.76 | 90.39 | 1.9  |                              |
| pikR2          | 9A | 35.78 | 84.77 | 1.83 | MultipleMeltPeaks            |
| pmrA           | 9A | 19.69 | 78.83 | 1.96 |                              |
| pncA           | 9A | 25.54 | 89.91 | 1.95 |                              |
| putative multi | 9A |       |       |      | LowEfficiency, CtIsSmall, S: |
| qac            | 9A |       |       |      | LowEfficiency, CtIsSmall, S: |
| qacA           | 9A |       |       |      | NoAmplification              |
| qacA/qacB      | 9A |       |       |      | NoAmplification              |
| qacEdelta1-0   | 9A |       |       |      | NoAmplification              |
| qacEdelta1-0   | 9A | 28.94 | 86.02 | 1.98 |                              |
| qacH-01        | 9A | 34.97 | 90.22 | 1.87 | MultipleMeltPeaks            |
| qacH-02        | 9A |       |       |      | LowEfficiency, CtIsSmall, Ci |
| qnrA           | 9A |       |       |      | NoAmplification              |

|              |    |       |       |      |                              |
|--------------|----|-------|-------|------|------------------------------|
| rarD-02      | 9A |       |       |      | NoAmplification              |
| sat4         | 9A |       |       |      | LowEfficiency, CtIsSmall, S: |
| sdeB         | 9A |       |       |      | CurveFitFailed               |
| spcN-01      | 9A |       |       |      | BadR2, LowEfficiency, CtIsS  |
| speA         | 9A |       |       |      | NoAmplification              |
| str          | 9A |       |       |      | NoAmplification              |
| strA         | 9A |       |       |      | LowEfficiency, CtIsSmall, S: |
| strB         | 9A | 29.14 | 83.71 | 1.94 |                              |
| sul1         | 9A |       |       |      | NoAmplification              |
| sul2         | 9A |       |       |      | CurveFitFailed               |
| sulA/foIP-01 | 9A | 17.39 | 80.9  | 2    |                              |
| sulA/foIP-03 | 9A | 16.61 | 83.38 | 2.05 |                              |
| tet(32)      | 9A | 20.16 | 81.48 | 1.98 |                              |
| tet(34)      | 9A | 28.78 | 75.98 | 2.02 |                              |
| tet(35)      | 9A |       |       |      | NoAmplification              |
| tet(36)-A    | 9A |       |       |      | CurveFitFailed               |
| tet(36)-B    | 9A |       |       |      | CurveFitFailed               |
| tet(37)      | 9A | 18.87 | 76.65 | 1.98 |                              |
| tetA-01      | 9A | 35.19 | 85.07 | 1.87 |                              |
| tetA-02      | 9A | 31.43 | 92.6  | 1.85 |                              |
| tetB-01      | 9A | 19.34 | 80.02 | 1.91 |                              |
| tetB-02      | 9A | 19.02 | 79.84 | 2    |                              |
| tetC-01      | 9A | 19.88 | 75.47 | 1.94 |                              |
| tetC-02      | 9A | 19.28 | 76.21 | 2.04 |                              |
| tetD-01      | 9A |       |       |      | LowEfficiency, CtIsSmall, S: |
| tetD-02      | 9A | 36.66 | 87.76 | 1.76 |                              |
| tetE         | 9A | 35.57 | 74.77 | 2.04 |                              |
| tetG-01      | 9A | 34.65 | 79.1  | 1.95 | MultipleMeltPeaks            |
| tetG-02      | 9A | 29.56 | 89    | 2    | MultipleMeltPeaks            |
| tetH         | 9A |       |       |      | NoAmplification              |
| tetJ         | 9A |       |       |      | LowEfficiency, CtIsSmall, S: |
| tetK         | 9A | 29.42 | 72.31 | 2.06 |                              |
| tetL-01      | 9A |       |       |      | CurveFitFailed               |
| tetL-02      | 9A | 32.05 | 90.36 | 2.01 |                              |
| tetM-01      | 9A | 15.27 | 76.18 | 2.08 |                              |
| tetM-02      | 9A | 14.85 | 77.54 | 2.07 |                              |
| tetO-01      | 9A | 20.32 | 76.9  | 2.04 |                              |
| tetPA        | 9A |       |       |      | NoAmplification              |
| tetPB-01     | 9A | 39.61 | 86.68 | 1.69 | MultipleMeltPeaks            |
| tetPB-02     | 9A | 31.26 | 85.3  | 2.06 |                              |
| tetPB-03     | 9A |       |       |      | CurveFitFailed               |
| tetPB-05     | 9A |       |       |      | CurveFitFailed               |
| tetQ         | 9A | 16.65 | 76.29 | 2.13 |                              |
| tetR-02      | 9A | 25.45 | 88.01 | 1.89 | MultipleMeltPeaks            |
| tetR-03      | 9A | 19.13 | 76.34 | 2    |                              |
| tetS         | 9A |       |       |      | CurveFitFailed               |

|             |    |       |       |                              |
|-------------|----|-------|-------|------------------------------|
| tetT        | 9A |       |       | NoAmplification              |
| tetU-01     | 9A |       |       | NoAmplification              |
| tetV        | 9A | 37.41 | 73.86 | 1.75 MultipleMeltPeaks       |
| tetW-01     | 9A | 25.86 | 81.52 | 1.98                         |
| tetX        | 9A |       |       | CurveFitFailed               |
| tnpA-01     | 9A |       |       | LowEfficiency, CtIsSmall, Ct |
| tnpA-02     | 9A | 29.02 | 89.51 | 1.75                         |
| tnpA-03     | 9A | 33.32 | 73.99 | 1.71 MultipleMeltPeaks       |
| tnpA-04     | 9A | 38.6  | 81.49 | 1.81                         |
| tnpA-05     | 9A | 29.05 | 80.73 | 1.93                         |
| tnpA-07     | 9A |       |       | NoAmplification              |
| tolC-01     | 9A | 38.48 | 79.19 | 1.75                         |
| tolC-02     | 9A | 30.32 | 85.46 | 1.97 MultipleMeltPeaks       |
| tolC-03     | 9A | 30.24 | 89.44 | 1.96                         |
| Tp614       | 9A | 33.97 | 80.78 | 1.95                         |
| ttgA        | 9A | 33.04 | 83.17 | 1.88 MultipleMeltPeaks       |
| ttgB        | 9A | 34.9  | 79.76 | 1.92 MultipleMeltPeaks       |
| vanA        | 9A |       |       | NoAmplification              |
| vanB-01     | 9A | 31.85 | 87.66 | 1.32 MultipleMeltPeaks       |
| vanC-01     | 9A | 36.4  | 81.5  | 1.86                         |
| vanC-02     | 9A |       |       | LowEfficiency, CtIsSmall, S: |
| vanC-03     | 9A | 27.75 | 90.64 | 1.98                         |
| vanC1       | 9A |       |       | NoAmplification              |
| vanC2/vanC3 | 9A | 30.76 | 84.26 | 2.15                         |
| vanG        | 9A |       |       | NoAmplification              |
| vanHB       | 9A | 32.75 | 83.27 | 1.67 MultipleMeltPeaks       |
| vanHD       | 9A | 32.41 | 90.05 | 1.87                         |
| vanRA-01    | 9A |       |       | NoAmplification              |
| vanRA-02    | 9A |       |       | NoAmplification              |
| vanRB       | 9A |       |       | CtIsLarge, CurveFitFailed    |
| vanRC       | 9A |       |       | LowEfficiency, CtIsSmall, S: |
| vanRC4      | 9A |       |       | LowEfficiency, CtIsSmall, S: |
| vanRD       | 9A |       |       | NoAmplification              |
| vanSA       | 9A |       |       | LowEfficiency, CtIsSmall, S: |
| vanSB       | 9A | 28.8  | 74.7  | 2.05                         |
| vanSC-01    | 9A | 30.39 | 77.57 | 1.82                         |
| vanSC-02    | 9A |       |       | NoAmplification              |
| vanTC-01    | 9A |       |       | LowEfficiency, CtIsSmall, S: |
| vanTC-02    | 9A | 33.45 | 87.08 | 1.95                         |
| vanTE       | 9A |       |       | NoAmplification              |
| vanTG       | 9A |       |       | NoAmplification              |
| vanWB       | 9A |       |       | LowEfficiency, CtIsSmall, S: |
| vanWG       | 9A |       |       | CurveFitFailed               |
| vanXA       | 9A | 39.2  | 82.77 | 1.72                         |
| vanXB       | 9A |       |       | NoAmplification              |
| vanXD       | 9A | 28.76 | 77.31 | 2.07                         |

|              |    |       |       |      |                              |
|--------------|----|-------|-------|------|------------------------------|
| vanYB        | 9A | 32.11 | 81.32 | 1.95 |                              |
| vanYD-01     | 9A | 33.25 | 80.31 | 1.83 | MultipleMeltPeaks            |
| vanYD-02     | 9A |       |       |      | NoAmplification              |
| vatB-01      | 9A |       |       |      | CurveFitFailed               |
| vatB-02      | 9A |       |       |      | LowEfficiency, CtIsSmall, S: |
| vatC-01      | 9A |       |       |      | CurveFitFailed               |
| vatC-02      | 9A |       |       |      | CurveFitFailed               |
| vatE-01      | 9A | 28.51 | 77.31 | 2.07 |                              |
| vatE-02      | 9A |       |       |      | NoAmplification              |
| vgaA-01      | 9A | 39.06 | 76.37 | 1.67 | MultipleMeltPeaks            |
| vgaA-02      | 9A |       |       |      | LowEfficiency, CtIsSmall, C: |
| vgb-01       | 9A |       |       |      | CurveFitFailed               |
| vgbB-01      | 9A |       |       |      | NoAmplification              |
| vgbB-02      | 9A |       |       |      | NoAmplification              |
| yceE/mdtG-0  | 9A |       |       |      | LowEfficiency, CtIsSmall, S: |
| yceE/mdtG-0  | 9A |       |       |      | NoAmplification              |
| yceL/mdtH-0  | 9A | 33.32 | 88.17 | 1.94 |                              |
| yceL/mdtH-0  | 9A |       |       |      | NoAmplification              |
| yceL/mdtH-0  | 9A | 37.53 | 90.74 | 1.7  | MultipleMeltPeaks            |
| yidY/mdtL-01 | 9A | 30.76 | 90.06 | 1.99 |                              |
| yidY/mdtL-02 | 9A |       |       |      | CurveFitFailed               |































| Assay          | Sample | Ct    | Tm    | Efficiency | flag                            |
|----------------|--------|-------|-------|------------|---------------------------------|
| 16S rRNA       | 9B     |       | 18.61 | 81.91      | 1.95 SaturationBaselineRatiolsL |
| aac            | 9B     |       |       |            | CurveFitFailed                  |
| aac(6')-Ib(akz | 9B     |       |       |            | LowEfficiency, CtIsSmall, Ci    |
| aac(6')-Ib(akz | 9B     | 30.59 | 81.93 | 1.93       | CtIsLarge, SaturationBaseli     |
| aac(6')-Ib(akz | 9B     |       |       |            | CurveFitFailed                  |
| aac(6')-II     | 9B     |       |       |            | LowEfficiency, CtIsSmall, Ci    |
| aac(6')I1      | 9B     |       |       |            | LowEfficiency, CtIsSmall, Ci    |
| aacA/aphD      | 9B     |       |       |            | CurveFitFailed                  |
| aacC           | 9B     | 32.19 | 91.77 | 1.8        | CtIsLarge, SaturationBaseli     |
| aacC1          | 9B     |       |       |            | LowEfficiency, CtIsSmall, Ci    |
| aacC2          | 9B     |       |       |            | LowEfficiency, CtIsSmall, Ci    |
| aacC4          | 9B     | 34.3  | 89.47 | 1.73       | LowEfficiency, CtIsLarge, S;    |
| aadA-01        | 9B     |       |       |            | BadR2, LowEfficiency, CtIsS     |
| aadA-02        | 9B     |       |       |            | CurveFitFailed                  |
| aadA-1-01      | 9B     |       |       |            | NoAmplification                 |
| aadA-1-02      | 9B     |       |       |            | LowEfficiency, CtIsSmall, Ci    |
| aadA1          | 9B     | 30.8  | 89.1  | 1.82       | CtIsLarge, SaturationBaseli     |
| aadA2-01       | 9B     |       |       |            | LowEfficiency, CtIsSmall, S;    |
| aadA2-02       | 9B     | 30.12 | 75.04 | 1.98       | CtIsLarge, SaturationBaseli     |
| aadA2-03       | 9B     |       |       |            | CurveFitFailed                  |
| aadA5-01       | 9B     |       |       |            | LowEfficiency, CtIsSmall, S;    |
| aadA5-02       | 9B     | 33.08 | 83.26 | 1.8        | LowEfficiency, CtIsLarge, S;    |
| aadA9-01       | 9B     |       |       |            | LowEfficiency, CtIsSmall, S;    |
| aadA9-02       | 9B     |       |       |            | LowEfficiency, CtIsSmall, Ci    |
| aadD           | 9B     |       |       |            | LowEfficiency, CtIsSmall, Ci    |
| aadE           | 9B     |       |       |            | LowEfficiency, CtIsSmall, Ci    |
| acrA-01        | 9B     | 28.97 | 88.34 | 2.01       | SaturationBaselineRatiolsL      |
| acrA-02        | 9B     |       |       |            | LowEfficiency, CtIsSmall, Ci    |
| acrA-03        | 9B     |       |       |            | CurveFitFailed                  |
| acrA-04        | 9B     | 30.98 | 84.73 | 1.96       | CtIsLarge, SaturationBaseli     |
| acrA-05        | 9B     | 30.88 | 85.17 | 1.91       | CtIsLarge, SaturationBaseli     |
| acrB-01        | 9B     |       |       |            | LowEfficiency, CtIsSmall, Ci    |
| acrF           | 9B     |       |       |            | CurveFitFailed                  |
| acrR-01        | 9B     | 32.75 | 89.51 | 1.78       | LowEfficiency, CtIsLarge, S;    |
| acrR-02        | 9B     | 32.32 | 85.95 | 2.06       | CtIsLarge, SaturationBaseli     |
| Actin          | 9B     | 20.17 | 86.75 | 2.04       | SaturationBaselineRatiolsL      |
| adeA           | 9B     |       |       |            | BadR2, LowEfficiency, CtIsS     |
| ampC-01        | 9B     |       |       |            | LowEfficiency, CtIsSmall, Ci    |
| ampC-02        | 9B     |       |       |            | LowEfficiency, CtIsSmall, S;    |
| ampC-04        | 9B     | 31.9  | 79.28 | 1.7        | LowEfficiency, CtIsLarge, S;    |
| ampC-05        | 9B     |       |       |            | LowEfficiency, CtIsSmall, Ci    |
| ampC-06        | 9B     |       |       |            | LowEfficiency, CtIsSmall, Ci    |
| ampC-07        | 9B     |       |       |            | LowEfficiency, CtIsSmall, Ci    |
| ampC-09        | 9B     |       |       |            | LowEfficiency, CtIsSmall, Ci    |
| ampC/blaDH.9B  | 9B     | 30.66 | 84.24 | 1.95       | CtIsLarge, SaturationBaseli     |

|               |    |       |       |      |                              |
|---------------|----|-------|-------|------|------------------------------|
| aph           | 9B |       |       |      | LowEfficiency, CtIsSmall, Ci |
| aph(2')-Id-01 | 9B |       |       |      | LowEfficiency, CtIsSmall, S  |
| aph(2')-Id-02 | 9B |       |       |      | LowEfficiency, CtIsSmall, Ci |
| aph6ia        | 9B |       |       |      | LowEfficiency, CtIsSmall, S  |
| aphA1(aka k   | 9B |       |       |      | LowEfficiency, CtIsSmall, S  |
| bacA-01       | 9B |       |       |      | BadR2, LowEfficiency, CtIsS  |
| bacA-02       | 9B |       |       |      | LowEfficiency, CtIsSmall, Ci |
| BETA-globin   | 9B | 21.07 | 84    | 2.11 | SaturationBaselineRatiolsL   |
| bla-ACC-1     | 9B |       |       |      | LowEfficiency, CtIsSmall, Ci |
| bla-L1        | 9B | 29.03 | 84.36 | 2.14 | SaturationBaselineRatiolsL   |
| bla1          | 9B |       |       |      | LowEfficiency, CtIsSmall, Ci |
| blaCMY        | 9B |       |       |      | CurveFitFailed               |
| blaCMY2-01    | 9B |       |       |      | CurveFitFailed               |
| blaCMY2-02    | 9B | 28.71 | 84.61 | 2    | SaturationBaselineRatiolsL   |
| blaCTX-M-01   | 9B |       |       |      | CurveFitFailed               |
| blaCTX-M-02   | 9B |       |       |      | LowEfficiency, CtIsSmall, S  |
| blaCTX-M-03   | 9B |       |       |      | CurveFitFailed               |
| blaCTX-M-04   | 9B |       |       |      | CurveFitFailed               |
| blaCTX-M-05   | 9B |       |       |      | NoAmplification              |
| blaCTX-M-06   | 9B |       |       |      | LowEfficiency, CtIsSmall, Ci |
| blaGES        | 9B |       |       |      | LowEfficiency, CtIsSmall, Ci |
| blaIMP-01     | 9B |       |       |      | NoAmplification              |
| blaIMP-02     | 9B |       |       |      | LowEfficiency, CtIsSmall, Ci |
| blaMOX/blaC   | 9B |       |       |      | LowEfficiency, CtIsSmall, Ci |
| blaOCH        | 9B |       |       |      | NoAmplification              |
| blaOKP        | 9B |       |       |      | NoAmplification              |
| blaOXA1/blaC  | 9B |       |       |      | CurveFitFailed               |
| blaOXA10-01   | 9B |       |       |      | LowEfficiency, CtIsSmall, S  |
| blaOXA10-02   | 9B |       |       |      | LowEfficiency, CtIsSmall, Ci |
| blaOXY        | 9B |       |       |      | CurveFitFailed               |
| blaPAO        | 9B |       |       |      | LowEfficiency, CtIsSmall, Ci |
| blaPER        | 9B |       |       |      | LowEfficiency, CtIsSmall, Ci |
| blaPSE        | 9B |       |       |      | LowEfficiency, CtIsSmall, Ci |
| blaROB        | 9B |       |       |      | LowEfficiency, CtIsSmall, Ci |
| blaSFO        | 9B | 32.45 | 80.68 | 1.87 | CtIsLarge, SaturationBaseli  |
| blaSHV-01     | 9B |       |       |      | LowEfficiency, CtIsSmall, S  |
| blaSHV-02     | 9B |       |       |      | LowEfficiency, CtIsSmall, Ci |
| blaTEM        | 9B |       |       |      | NoAmplification              |
| blaTLA        | 9B |       |       |      | LowEfficiency, CtIsSmall, Ci |
| blaVEB        | 9B |       |       |      | LowEfficiency, CtIsSmall, S  |
| blaVIM        | 9B |       |       |      | BadR2, LowEfficiency, CtIsS  |
| blaZ          | 9B |       |       |      | LowEfficiency, CtIsSmall, S  |
| carB          | 9B |       |       |      | CurveFitFailed               |
| catA1         | 9B |       |       |      | NoAmplification              |
| catB3         | 9B | 33.14 | 87.48 | 1.96 | CtIsLarge, SaturationBaseli  |
| catB8         | 9B | 30.21 | 83.03 | 1.99 | CtIsLarge, SaturationBaseli  |

|            |    |       |       |      |                              |
|------------|----|-------|-------|------|------------------------------|
| ceoA       | 9B | 29.65 | 82.07 | 2.02 | CtIsLarge, SaturationBaseli  |
| cepA       | 9B |       |       |      | LowEfficiency, CtIsSmall, S  |
| cfiA       | 9B | 33.77 | 84.25 | 1.92 | CtIsLarge, SaturationBaseli  |
| cfr        | 9B |       |       |      | LowEfficiency, CtIsSmall, Ci |
| cfxA       | 9B | 26.11 | 77.12 | 1.8  | SaturationBaselineRatiolsL   |
| cmeA       | 9B |       |       |      | LowEfficiency, CtIsSmall, Ci |
| cmlA1-01   | 9B |       |       |      | LowEfficiency, CtIsSmall, Ci |
| cmlA1-02   | 9B |       |       |      | LowEfficiency, CtIsSmall, Ci |
| cmr        | 9B |       |       |      | BadR2, LowEfficiency, CtIsS  |
| cmx(A)     | 9B |       |       |      | CurveFitFailed               |
| cphA-01    | 9B |       |       |      | CtIsLarge, SaturationBaseli  |
| cphA-02    | 9B | 32.16 | 76.3  | 1.85 | CtIsLarge, SaturationBaseli  |
| dfrA1      | 9B |       |       |      | CurveFitFailed               |
| dfrA12     | 9B |       |       |      | CurveFitFailed               |
| emrD       | 9B |       |       |      | BadR2, LowEfficiency, CtIsS  |
| ereA       | 9B |       |       |      | CurveFitFailed               |
| ereB       | 9B |       |       |      | CurveFitFailed               |
| erm(34)    | 9B |       |       |      | LowEfficiency, CtIsSmall, Ci |
| erm(35)    | 9B |       |       |      | LowEfficiency, CtIsSmall, Ci |
| erm(36)    | 9B |       |       |      | LowEfficiency, CtIsSmall, Ci |
| ermA       | 9B |       |       |      | LowEfficiency, CtIsSmall, Ci |
| ermA/ermTR | 9B | 31.21 | 75.15 | 1.93 | CtIsLarge, SaturationBaseli  |
| ermB       | 9B | 24.32 | 74.46 | 1.92 | SaturationBaselineRatiolsL   |
| ermC       | 9B |       |       |      | CurveFitFailed               |
| ermF       | 9B | 25.32 | 73.96 | 1.93 | SaturationBaselineRatiolsL   |
| ermJ/ermD  | 9B |       |       |      | LowEfficiency, CtIsSmall, Ci |
| ermK-01    | 9B |       |       |      | CurveFitFailed               |
| ermK-02    | 9B |       |       |      | CurveFitFailed               |
| ermT-01    | 9B |       |       |      | LowEfficiency, CtIsSmall, Ci |
| ermT-02    | 9B |       |       |      | LowEfficiency, CtIsSmall, S  |
| ermX       | 9B | 24.69 | 84.04 | 1.72 | LowEfficiency, SaturationB:  |
| ermY       | 9B |       |       |      | LowEfficiency, CtIsSmall, Ci |
| fabK       | 9B |       |       |      | CurveFitFailed               |
| floR       | 9B |       |       |      | LowEfficiency, CtIsSmall, Ci |
| folA       | 9B |       |       |      | BadR2, LowEfficiency, CtIsS  |
| fosB       | 9B |       |       |      | LowEfficiency, CtIsSmall, Ci |
| fosX       | 9B |       |       |      | LowEfficiency, CtIsSmall, Ci |
| fox5       | 9B | 29.62 | 85.91 | 1.82 | CtIsLarge, SaturationBaseli  |
| imiR       | 9B |       |       |      | LowEfficiency, CtIsSmall, Ci |
| ImrA-01    | 9B |       |       |      | LowEfficiency, CtIsSmall, Ci |
| intl       | 9B | 30.71 | 84.84 | 1.65 | LowEfficiency, CtIsLarge, S  |
| intl1      | 9B | 20.75 | 86.74 | 2.43 | SaturationBaselineRatiolsL   |
| IS613      | 9B | 28.08 | 79.22 | 1.77 | LowEfficiency, SaturationB:  |
| lnuA-01    | 9B |       |       |      | LowEfficiency, CtIsSmall, Ci |
| lnuB-01    | 9B |       |       |      | LowEfficiency, CtIsSmall, Ci |
| lnuB-02    | 9B |       |       |      | CurveFitFailed               |

|              |    |       |       |      |                              |
|--------------|----|-------|-------|------|------------------------------|
| lnuC         | 9B |       |       |      | LowEfficiency, CtIsSmall, Ci |
| marR-01      | 9B |       |       |      | CurveFitFailed               |
| matA/mel     | 9B | 21.9  | 77.18 | 2.18 | SaturationBaselineRatiolsL   |
| mdet1        | 9B |       |       |      | LowEfficiency, CtIsSmall, Ci |
| mdtA         | 9B |       |       |      | BadR2, LowEfficiency, CtIsS  |
| mdtE/yhiU    | 9B |       |       |      | LowEfficiency, CtIsSmall, Ci |
| mecA         | 9B |       |       |      | LowEfficiency, CtIsSmall, Ci |
| mefA         | 9B | 21.63 | 80.4  | 2.09 | SaturationBaselineRatiolsL   |
| mepA         | 9B |       |       |      | CurveFitFailed               |
| mexA         | 9B |       |       |      | LowEfficiency, CtIsSmall, Ci |
| mexD         | 9B | 32.33 | 80.06 | 1.88 | CtIsLarge, SaturationBaseli  |
| mexE         | 9B |       |       |      | LowEfficiency, CtIsSmall, Ci |
| mexF         | 9B |       |       |      | CurveFitFailed               |
| mphA-01      | 9B | 31.51 | 86.75 | 1.75 | LowEfficiency, CtIsLarge, S; |
| mphA-02      | 9B |       |       |      | CurveFitFailed               |
| mphB         | 9B |       |       |      | LowEfficiency, CtIsSmall, Ci |
| mphC         | 9B |       |       |      | LowEfficiency, CtIsSmall, Ci |
| msrA-01      | 9B |       |       |      | LowEfficiency, CtIsSmall, Ci |
| msrC-01      | 9B |       |       |      | NoAmplification              |
| mtrC-01      | 9B |       |       |      | LowEfficiency, CtIsSmall, Ci |
| mtrC-02      | 9B |       |       |      | CurveFitFailed               |
| mtrD-02      | 9B | 27.23 | 85.22 | 2.1  | SaturationBaselineRatiolsL   |
| mtrD-03      | 9B |       |       |      | LowEfficiency, CtIsSmall, Ci |
| NDM1         | 9B |       |       |      | LowEfficiency, CtIsSmall, S; |
| nimE         | 9B |       |       |      | LowEfficiency, CtIsSmall, Ci |
| nisB         | 9B |       |       |      | LowEfficiency, CtIsSmall, Ci |
| oleC         | 9B |       |       |      | BadR2, LowEfficiency, CtIsS  |
| oprD         | 9B | 28.13 | 86.5  | 2.18 | SaturationBaselineRatiolsL   |
| oprJ         | 9B |       |       |      | CurveFitFailed               |
| pbp          | 9B |       |       |      | LowEfficiency, CtIsSmall, S; |
| pbp2x        | 9B |       |       |      | CurveFitFailed               |
| Pbp5         | 9B |       |       |      | LowEfficiency, CtIsSmall, Ci |
| penA         | 9B |       |       |      | LowEfficiency, CtIsSmall, Ci |
| pikR1        | 9B |       |       |      | LowEfficiency, CtIsSmall, Ci |
| pikR2        | 9B |       |       |      | CurveFitFailed               |
| pmrA         | 9B | 24.14 | 78.5  | 1.87 | SaturationBaselineRatiolsL   |
| pncA         | 9B | 32.3  | 86.16 | 1.91 | CtIsLarge, SaturationBaseli  |
| putative mul | 9B |       |       |      | CurveFitFailed               |
| qac          | 9B | 33.6  | 78.74 | 2    | CtIsLarge, SaturationBaseli  |
| qacA         | 9B |       |       |      | CurveFitFailed               |
| qacA/qacB    | 9B |       |       |      | LowEfficiency, CtIsSmall, S; |
| qacEdelta1-0 | 9B |       |       |      | LowEfficiency, CtIsSmall, S; |
| qacEdelta1-0 | 9B | 30.06 | 76.58 | 1.79 | LowEfficiency, CtIsLarge, S; |
| qacH-01      | 9B |       |       |      | LowEfficiency, CtIsSmall, S; |
| qacH-02      | 9B |       |       |      | CurveFitFailed               |
| qnrA         | 9B |       |       |      | CurveFitFailed               |



|              |    |       |       |      |                              |
|--------------|----|-------|-------|------|------------------------------|
| rarD-02      | 9B |       |       |      | CurveFitFailed               |
| sat4         | 9B |       |       |      | LowEfficiency, CtIsSmall, Ci |
| sdeB         | 9B |       |       |      | LowEfficiency, CtIsSmall, Ci |
| spcN-01      | 9B |       |       |      | CurveFitFailed               |
| speA         | 9B |       |       |      | LowEfficiency, CtIsSmall, Ci |
| str          | 9B |       |       |      | LowEfficiency, CtIsSmall, Ci |
| strA         | 9B |       |       |      | LowEfficiency, CtIsSmall, Ci |
| strB         | 9B | 27.24 | 83.87 | 1.93 | SaturationBaselineRatiolsL   |
| sul1         | 9B |       |       |      | CurveFitFailed               |
| sul2         | 9B |       |       |      | LowEfficiency, CtIsSmall, Ci |
| sulA/foIP-01 | 9B | 22.94 | 80.46 | 2.06 | SaturationBaselineRatiolsL   |
| sulA/foIP-03 | 9B | 24.01 | 83.2  | 2.08 | SaturationBaselineRatiolsL   |
| tet(32)      | 9B | 34.11 | 87.06 | 1.95 | CtIsLarge, SaturationBaseli  |
| tet(34)      | 9B | 33.83 | 74.83 | 1.92 | CtIsLarge, SaturationBaseli  |
| tet(35)      | 9B | 28.22 | 76.93 | 1.96 | SaturationBaselineRatiolsL   |
| tet(36)-A    | 9B |       |       |      | LowEfficiency, CtIsSmall, Ci |
| tet(36)-B    | 9B |       |       |      | LowEfficiency, CtIsSmall, Ci |
| tet(37)      | 9B | 28.27 | 83.72 | 2    | SaturationBaselineRatiolsL   |
| tetA-01      | 9B | 22.54 | 75.46 | 2.12 | SaturationBaselineRatiolsL   |
| tetA-02      | 9B |       |       |      | CurveFitFailed               |
| tetB-01      | 9B | 27.55 | 79.27 | 1.85 | SaturationBaselineRatiolsL   |
| tetB-02      | 9B | 27.45 | 79.46 | 2.04 | SaturationBaselineRatiolsL   |
| tetC-01      | 9B | 26.79 | 74.72 | 1.94 | SaturationBaselineRatiolsL   |
| tetC-02      | 9B | 28.26 | 75.65 | 2.19 | SaturationBaselineRatiolsL   |
| tetD-01      | 9B |       |       |      | LowEfficiency, CtIsSmall, Ci |
| tetD-02      | 9B |       |       |      | BadR2, LowEfficiency, CtIsS  |
| tetE         | 9B |       |       |      | LowEfficiency, CtIsSmall, S; |
| tetG-01      | 9B |       |       |      | LowEfficiency, CtIsSmall, Ci |
| tetG-02      | 9B |       |       |      | LowEfficiency, CtIsSmall, Ci |
| tetH         | 9B |       |       |      | LowEfficiency, CtIsSmall, S; |
| tetJ         | 9B |       |       |      | LowEfficiency, CtIsSmall, Ci |
| tetK         | 9B |       |       |      | LowEfficiency, CtIsSmall, S; |
| tetL-01      | 9B |       |       |      | LowEfficiency, CtIsSmall, Ci |
| tetL-02      | 9B |       |       |      | CurveFitFailed               |
| tetM-01      | 9B |       |       |      | LowEfficiency, CtIsSmall, S; |
| tetM-02      | 9B | 22.6  | 77.14 | 2.16 | SaturationBaselineRatiolsL   |
| tetO-01      | 9B | 29.56 | 76.24 | 1.97 | CtIsLarge, SaturationBaseli  |
| tetPA        | 9B |       |       |      | LowEfficiency, CtIsSmall, Ci |
| tetPB-01     | 9B |       |       |      | LowEfficiency, CtIsSmall, Ci |
| tetPB-02     | 9B | 29.2  | 84.65 | 2.16 | SaturationBaselineRatiolsL   |
| tetPB-03     | 9B |       |       |      | LowEfficiency, CtIsSmall, Ci |
| tetPB-05     | 9B |       |       |      | CurveFitFailed               |
| tetQ         | 9B | 28.36 | 75.48 | 2.06 | SaturationBaselineRatiolsL   |
| tetR-02      | 9B | 33.63 | 82.52 | 1.85 | CtIsLarge, SaturationBaseli  |
| tetR-03      | 9B | 27.98 | 75.68 | 2.04 | SaturationBaselineRatiolsL   |
| tetS         | 9B |       |       |      | CurveFitFailed               |

|             |    |       |       |      |                              |
|-------------|----|-------|-------|------|------------------------------|
| tetT        | 9B |       |       |      | LowEfficiency, CtIsSmall, Ci |
| tetU-01     | 9B |       |       |      | LowEfficiency, CtIsSmall, Ci |
| tetV        | 9B |       |       |      | LowEfficiency, CtIsSmall, Ci |
| tetW-01     | 9B |       |       |      | LowEfficiency, CtIsSmall, Ci |
| tetX        | 9B |       |       |      | LowEfficiency, CtIsSmall, S: |
| tnpA-01     | 9B |       |       |      | CurveFitFailed               |
| tnpA-02     | 9B | 29.02 | 84.76 | 1.68 | LowEfficiency, SaturationB:  |
| tnpA-03     | 9B |       |       |      | LowEfficiency, CtIsSmall, Ci |
| tnpA-04     | 9B |       |       |      | LowEfficiency, CtIsSmall, Ci |
| tnpA-05     | 9B |       |       |      | LowEfficiency, CtIsSmall, Ci |
| tnpA-07     | 9B |       |       |      | LowEfficiency, CtIsSmall, S: |
| tolC-01     | 9B |       |       |      | LowEfficiency, CtIsSmall, Ci |
| tolC-02     | 9B | 31.05 | 83.57 | 1.96 | CtIsLarge, SaturationBaseli  |
| tolC-03     | 9B | 31.5  | 85.25 | 2.24 | CtIsLarge, SaturationBaseli  |
| Tp614       | 9B |       |       |      | LowEfficiency, CtIsSmall, Ci |
| ttgA        | 9B |       |       |      | LowEfficiency, CtIsSmall, Ci |
| ttgB        | 9B |       |       |      | CurveFitFailed               |
| vanA        | 9B |       |       |      | LowEfficiency, CtIsSmall, Ci |
| vanB-01     | 9B |       |       |      | CurveFitFailed               |
| vanC-01     | 9B |       |       |      | LowEfficiency, CtIsSmall, Ci |
| vanC-02     | 9B |       |       |      | LowEfficiency, CtIsSmall, S: |
| vanC-03     | 9B |       |       |      | CurveFitFailed               |
| vanC1       | 9B |       |       |      | LowEfficiency, CtIsSmall, Ci |
| vanC2/vanC3 | 9B |       |       |      | CurveFitFailed               |
| vanG        | 9B |       |       |      | LowEfficiency, CtIsSmall, S: |
| vanHB       | 9B |       |       |      | CurveFitFailed               |
| vanHD       | 9B |       |       |      | BadR2, LowEfficiency, CtIsS  |
| vanRA-01    | 9B |       |       |      | LowEfficiency, CtIsSmall, Ci |
| vanRA-02    | 9B |       |       |      | LowEfficiency, CtIsSmall, Ci |
| vanRB       | 9B |       |       |      | CurveFitFailed               |
| vanRC       | 9B |       |       |      | LowEfficiency, CtIsSmall, Ci |
| vanRC4      | 9B |       |       |      | LowEfficiency, CtIsSmall, Ci |
| vanRD       | 9B |       |       |      | CurveFitFailed               |
| vanSA       | 9B |       |       |      | CurveFitFailed               |
| vanSB       | 9B | 29.13 | 74.04 | 2.06 | SaturationBaselineRatiolsL   |
| vanSC-01    | 9B |       |       |      | CurveFitFailed               |
| vanSC-02    | 9B |       |       |      | NoAmplification              |
| vanTC-01    | 9B |       |       |      | LowEfficiency, CtIsSmall, Ci |
| vanTC-02    | 9B |       |       |      | LowEfficiency, CtIsSmall, Ci |
| vanTE       | 9B |       |       |      | LowEfficiency, CtIsSmall, S: |
| vanTG       | 9B |       |       |      | LowEfficiency, CtIsSmall, Ci |
| vanWB       | 9B |       |       |      | LowEfficiency, CtIsSmall, S: |
| vanWG       | 9B |       |       |      | LowEfficiency, CtIsSmall, S: |
| vanXA       | 9B |       |       |      | LowEfficiency, CtIsSmall, S: |
| vanXB       | 9B |       |       |      | CurveFitFailed               |
| vanXD       | 9B | 30.42 | 74.54 | 1.96 | CtIsLarge, SaturationBaseli  |

|              |    |       |       |      |                              |
|--------------|----|-------|-------|------|------------------------------|
| vanYB        | 9B |       |       |      | LowEfficiency, CtIsSmall, S: |
| vanYD-01     | 9B | 30.72 | 85.14 | 1.68 | LowEfficiency, CtIsLarge, S: |
| vanYD-02     | 9B |       |       |      | LowEfficiency, CtIsSmall, S: |
| vatB-01      | 9B |       |       |      | CurveFitFailed               |
| vatB-02      | 9B |       |       |      | LowEfficiency, CtIsSmall, Ci |
| vatC-01      | 9B | 33.64 | 81.14 | 1.87 | CtIsLarge, SaturationBaseli  |
| vatC-02      | 9B |       |       |      | LowEfficiency, CtIsSmall, Ci |
| vatE-01      | 9B | 31.7  | 76.57 | 1.94 | CtIsLarge, SaturationBaseli  |
| vatE-02      | 9B |       |       |      | LowEfficiency, CtIsSmall, Ci |
| vgaA-01      | 9B |       |       |      | LowEfficiency, CtIsSmall, Ci |
| vgaA-02      | 9B |       |       |      | CurveFitFailed               |
| vgb-01       | 9B |       |       |      | CurveFitFailed               |
| vgbB-01      | 9B |       |       |      | LowEfficiency, CtIsSmall, S: |
| vgbB-02      | 9B |       |       |      | LowEfficiency, CtIsSmall, Ci |
| yceE/mdtG-0  | 9B |       |       |      | CurveFitFailed               |
| yceE/mdtG-0  | 9B |       |       |      | NoAmplification              |
| yceL/mdtH-0  | 9B |       |       |      | CurveFitFailed               |
| yceL/mdtH-0  | 9B |       |       |      | LowEfficiency, CtIsSmall, Ci |
| yceL/mdtH-0  | 9B |       |       |      | CurveFitFailed               |
| yidY/mdtL-01 | 9B |       |       |      | CurveFitFailed               |
| yidY/mdtL-02 | 9B |       |       |      | CurveFitFailed               |































| Assay           | Sample | Ct | Tm    | Efficiency | flag                         |
|-----------------|--------|----|-------|------------|------------------------------|
| 16S rRNA        | 9C     |    | 25.48 | 81.41      | 2.03                         |
| aac             | 9C     |    | 30.44 | 78.51      | 1.73 MultipleMeltPeaks       |
| aac(6')-Ib(akz) | 9C     |    |       |            | LowEfficiency, CtIsSmall, S: |
| aac(6')-Ib(akz) | 9C     |    | 35.13 | 77.94      | 1.9 MultipleMeltPeaks        |
| aac(6')-Ib(akz) | 9C     |    | 31.97 | 76.04      | 1.97 MultipleMeltPeaks       |
| aac(6')-II      | 9C     |    |       |            | CurveFitFailed               |
| aac(6')I1       | 9C     |    |       |            | NoAmplification              |
| aacA/aphD       | 9C     |    |       |            | LowEfficiency, CtIsSmall, Ci |
| aacC            | 9C     |    | 36.44 | 77.23      | 1.87                         |
| aacC1           | 9C     |    |       |            | NoAmplification              |
| aacC2           | 9C     |    |       |            | NoAmplification              |
| aacC4           | 9C     |    |       |            | NoAmplification              |
| aadA-01         | 9C     |    |       |            | LowEfficiency, CtIsSmall, Ci |
| aadA-02         | 9C     |    |       |            | CurveFitFailed               |
| aadA-1-01       | 9C     |    | 35.56 | 82.24      | 1.9                          |
| aadA-1-02       | 9C     |    |       |            | CurveFitFailed               |
| aadA1           | 9C     |    | 37.59 | 84.71      | 1.88 MultipleMeltPeaks       |
| aadA2-01        | 9C     |    | 37.89 | 62.04      | 1.83 MultipleMeltPeaks       |
| aadA2-02        | 9C     |    |       |            | NoAmplification              |
| aadA2-03        | 9C     |    |       |            | CurveFitFailed               |
| aadA5-01        | 9C     |    | 38.52 | 74.5       | 1.91 MultipleMeltPeaks       |
| aadA5-02        | 9C     |    | 36.24 | 83.92      | 1.93                         |
| aadA9-01        | 9C     |    |       |            | CurveFitFailed               |
| aadA9-02        | 9C     |    | 35.41 | 72.94      | 1.93 MultipleMeltPeaks       |
| aadD            | 9C     |    |       |            | NoAmplification              |
| aadE            | 9C     |    |       |            | LowEfficiency, CtIsSmall, Ci |
| acrA-01         | 9C     |    | 32.07 | 89.12      | 1.92                         |
| acrA-02         | 9C     |    | 37.78 | 84.23      | 1.84                         |
| acrA-03         | 9C     |    |       |            | LowEfficiency, CtIsSmall, Ci |
| acrA-04         | 9C     |    | 30.56 | 80.68      | 1.98 MultipleMeltPeaks       |
| acrA-05         | 9C     |    | 31.53 | 88.42      | 1.96 MultipleMeltPeaks       |
| acrB-01         | 9C     |    | 37.95 | 75.57      | 1.84 MultipleMeltPeaks       |
| acrF            | 9C     |    | 28.75 | 82.86      | 1.81                         |
| acrR-01         | 9C     |    | 38.72 | 81.11      | 1.77                         |
| acrR-02         | 9C     |    | 31.14 | 84.93      | 1.9                          |
| Actin           | 9C     |    | 22.32 | 87.05      | 1.96                         |
| adeA            | 9C     |    | 38.39 | 62.52      | 1.91 MultipleMeltPeaks       |
| ampC-01         | 9C     |    | 31.81 | 80.35      | 2.02 MultipleMeltPeaks       |
| ampC-02         | 9C     |    | 36.7  | 87.09      | 1.95                         |
| ampC-04         | 9C     |    | 32.75 | 78.56      | 1.92                         |
| ampC-05         | 9C     |    |       |            | LowEfficiency, CtIsSmall, Ci |
| ampC-06         | 9C     |    |       |            | LowEfficiency, CtIsSmall, S: |
| ampC-07         | 9C     |    | 37.32 | 82.6       | 1.8 MultipleMeltPeaks        |
| ampC-09         | 9C     |    |       |            | LowEfficiency, CtIsSmall, S: |
| ampC/blaDH      | 9C     |    | 31.41 | 80.1       | 1.99 MultipleMeltPeaks       |

|                            |    |       |       |      |                              |
|----------------------------|----|-------|-------|------|------------------------------|
| aph                        | 9C |       |       |      | LowEfficiency, CtIsSmall, S: |
| aph(2')-Id-01              | 9C |       |       |      | LowEfficiency, CtIsSmall, S: |
| aph(2')-Id-02              | 9C |       |       |      | LowEfficiency, CtIsSmall, S: |
| aph6ia                     | 9C | 37.21 | 76.16 | 1.89 | MultipleMeltPeaks            |
| aphA1(aka k <sub>z</sub> ) | 9C | 35.09 | 78.71 | 1.91 |                              |
| bacA-01                    | 9C |       |       |      | CurveFitFailed               |
| bacA-02                    | 9C | 35.87 | 74.58 | 1.85 |                              |
| BETA-globin                | 9C | 23.09 | 84.12 | 1.97 | MultipleMeltPeaks            |
| bla-ACC-1                  | 9C | 37.14 | 63.54 | 2.14 | MultipleMeltPeaks            |
| bla-L1                     | 9C | 32.03 | 85.54 | 1.92 |                              |
| bla1                       | 9C |       |       |      | LowEfficiency, CtIsSmall, S: |
| blaCMY                     | 9C | 38.63 | 77.25 | 1.85 |                              |
| blaCMY2-01                 | 9C | 37.49 | 84    | 1.86 | MultipleMeltPeaks            |
| blaCMY2-02                 | 9C | 28.69 | 85.3  | 2.02 | MultipleMeltPeaks            |
| blaCTX-M-01                | 9C |       |       |      | NoAmplification              |
| blaCTX-M-02                | 9C | 41.22 | 79.6  | 1.67 | MultipleMeltPeaks            |
| blaCTX-M-03                | 9C |       |       |      | LowEfficiency, CtIsSmall, S: |
| blaCTX-M-04                | 9C | 37.91 | 82.42 | 1.77 |                              |
| blaCTX-M-05                | 9C | 31.82 | 77.1  | 1.84 |                              |
| blaCTX-M-06                | 9C |       |       |      | NoAmplification              |
| blaGES                     | 9C |       |       |      | CurveFitFailed               |
| blaIMP-01                  | 9C |       |       |      | NoAmplification              |
| blaIMP-02                  | 9C | 38.86 | 77.53 | 1.84 |                              |
| blaMOX/blaC                | 9C | 37.33 | 62.11 | 1.91 | MultipleMeltPeaks            |
| blaOCH                     | 9C |       |       |      | NoAmplification              |
| blaOKP                     | 9C |       |       |      | NoAmplification              |
| blaOXA1/blaC               | 9C |       |       |      | LowEfficiency, CtIsSmall, S: |
| blaOXA10-01                | 9C | 39.83 | 79.05 | 1.79 |                              |
| blaOXA10-02                | 9C | 37.73 | 85.36 | 1.98 | MultipleMeltPeaks            |
| blaOXY                     | 9C |       |       |      | CurveFitFailed               |
| blaPAO                     | 9C |       |       |      | NoAmplification              |
| blaPER                     | 9C | 33.3  | 78.86 | 1.99 |                              |
| blaPSE                     | 9C |       |       |      | NoAmplification              |
| blaROB                     | 9C |       |       |      | NoAmplification              |
| blaSFO                     | 9C | 32.53 | 89.62 | 1.92 |                              |
| blaSHV-01                  | 9C | 33.89 | 73.64 | 2.17 |                              |
| blaSHV-02                  | 9C | 35.28 | 81.03 | 1.98 |                              |
| blaTEM                     | 9C |       |       |      | NoAmplification              |
| blaTLA                     | 9C |       |       |      | CurveFitFailed               |
| blaVEB                     | 9C |       |       |      | NoAmplification              |
| blaVIM                     | 9C |       |       |      | NoAmplification              |
| blaZ                       | 9C |       |       |      | CurveFitFailed               |
| carB                       | 9C |       |       |      | CurveFitFailed               |
| catA1                      | 9C |       |       |      | NoAmplification              |
| catB3                      | 9C |       |       |      | LowEfficiency, CtIsSmall, C: |
| catB8                      | 9C | 30.64 | 84.41 | 1.96 | MultipleMeltPeaks            |

|            |    |       |       |      |                              |
|------------|----|-------|-------|------|------------------------------|
| ceoA       | 9C | 29.12 | 82.32 | 1.95 |                              |
| cepA       | 9C |       |       |      | NoAmplification              |
| cfiA       | 9C | 32.45 | 87.86 | 1.74 |                              |
| cfr        | 9C |       |       |      | LowEfficiency, CtIsSmall, S: |
| cfxA       | 9C | 27.36 | 77.82 | 1.99 |                              |
| cmeA       | 9C |       |       |      | CurveFitFailed               |
| cmlA1-01   | 9C |       |       |      | LowEfficiency, CtIsSmall, C: |
| cmlA1-02   | 9C | 36.72 | 79.54 | 1.84 | MultipleMeltPeaks            |
| cmr        | 9C |       |       |      | CurveFitFailed               |
| cmx(A)     | 9C | 26.75 | 84.66 | 1.98 |                              |
| cphA-01    | 9C | 30.17 | 86.15 | 1.9  |                              |
| cphA-02    | 9C | 35.38 | 82.7  | 1.9  |                              |
| dfrA1      | 9C | 33.72 | 83.62 | 1.81 |                              |
| dfrA12     | 9C | 37.75 | 86.24 | 1.69 |                              |
| emrD       | 9C |       |       |      | LowEfficiency, CtIsSmall, C: |
| ereA       | 9C | 36.06 | 77.94 | 1.9  |                              |
| ereB       | 9C | 34.09 | 87.79 | 2.04 | MultipleMeltPeaks            |
| erm(34)    | 9C |       |       |      | NoAmplification              |
| erm(35)    | 9C |       |       |      | CurveFitFailed               |
| erm(36)    | 9C | 36.91 | 83.15 | 1.84 | MultipleMeltPeaks            |
| ermA       | 9C |       |       |      | LowEfficiency, CtIsSmall, S: |
| ermA/ermTR | 9C |       |       |      | NoAmplification              |
| ermB       | 9C |       |       |      | LowEfficiency, CtIsSmall, S: |
| ermC       | 9C |       |       |      | CurveFitFailed               |
| ermF       | 9C | 29.52 | 74.86 | 2.01 |                              |
| ermJ/ermD  | 9C |       |       |      | CurveFitFailed               |
| ermK-01    | 9C | 31    | 75.61 | 2.03 |                              |
| ermK-02    | 9C | 32.78 | 79.13 | 1.9  | MultipleMeltPeaks            |
| ermT-01    | 9C |       |       |      | LowEfficiency, CtIsSmall, C: |
| ermT-02    | 9C | 35.34 | 79.86 | 1.99 |                              |
| ermX       | 9C | 28.41 | 84.04 | 1.89 |                              |
| ermY       | 9C |       |       |      | LowEfficiency, CtIsSmall, C: |
| fabK       | 9C | 25.71 | 79.57 | 2.13 |                              |
| floR       | 9C |       |       |      | NoAmplification              |
| folA       | 9C |       |       |      | NoAmplification              |
| fosB       | 9C |       |       |      | LowEfficiency, CtIsSmall, S: |
| fosX       | 9C |       |       |      | CurveFitFailed               |
| fox5       | 9C | 29.27 | 86.89 | 1.98 |                              |
| imiR       | 9C |       |       |      | NoAmplification              |
| ImrA-01    | 9C | 34.03 | 78.73 | 2.05 |                              |
| intl       | 9C | 28.99 | 84.62 | 1.97 |                              |
| intl1      | 9C | 21.31 | 86.8  | 2.05 | MultipleMeltPeaks            |
| IS613      | 9C |       |       |      | BadR2, LowEfficiency, CtIsS  |
| lnuA-01    | 9C |       |       |      | LowEfficiency, CtIsSmall, S: |
| lnuB-01    | 9C |       |       |      | LowEfficiency, CtIsSmall, C: |
| lnuB-02    | 9C |       |       |      | CurveFitFailed               |

|                |    |       |       |      |                              |
|----------------|----|-------|-------|------|------------------------------|
| lnuC           | 9C | 34.74 | 83.86 | 1.73 |                              |
| marR-01        | 9C | 33.87 | 87.96 | 1.88 | MultipleMeltPeaks            |
| matA/mel       | 9C | 27.13 | 76.91 | 2.03 | MultipleMeltPeaks            |
| mdet1          | 9C | 39.49 | 73.65 | 1.81 |                              |
| mdtA           | 9C | 36.01 | 82.16 | 1.74 |                              |
| mdtE/yhiU      | 9C |       |       |      | NoAmplification              |
| mecA           | 9C |       |       |      | LowEfficiency, CtIsSmall, Ci |
| mefA           | 9C | 27.58 | 83.54 | 1.97 |                              |
| mepA           | 9C | 36.17 | 85.09 | 1.84 |                              |
| mexA           | 9C | 37.82 | 62.84 | 1.8  | MultipleMeltPeaks            |
| mexD           | 9C | 34.49 | 80.03 | 2.08 |                              |
| mexE           | 9C |       |       |      | NoAmplification              |
| mexF           | 9C | 30.61 | 81.2  | 1.91 |                              |
| mphA-01        | 9C | 31.64 | 81.01 | 1.92 | MultipleMeltPeaks            |
| mphA-02        | 9C | 30.41 | 86.85 | 1.44 |                              |
| mphB           | 9C | 33.95 | 76.15 | 1.99 |                              |
| mphC           | 9C |       |       |      | BadR2, CtIsLarge, CurveFitI  |
| msrA-01        | 9C |       |       |      | CurveFitFailed               |
| msrC-01        | 9C |       |       |      | NoAmplification              |
| mtrC-01        | 9C |       |       |      | NoAmplification              |
| mtrC-02        | 9C | 31.5  | 84.25 | 1.92 |                              |
| mtrD-02        | 9C | 28.14 | 81.54 | 1.97 |                              |
| mtrD-03        | 9C | 38.99 | 80.73 | 1.79 |                              |
| NDM1           | 9C |       |       |      | LowEfficiency, CtIsSmall, Ci |
| nimE           | 9C | 37.52 | 74.25 | 1.96 |                              |
| nisB           | 9C | 32.54 | 82.76 | 1.92 |                              |
| oleC           | 9C | 31.5  | 84.23 | 1.87 |                              |
| oprD           | 9C | 28.97 | 86.74 | 2.01 | MultipleMeltPeaks            |
| oprJ           | 9C |       |       |      | NoAmplification              |
| pbp            | 9C |       |       |      | LowEfficiency, CtIsSmall, S: |
| pbp2x          | 9C | 29.88 | 75.33 | 1.99 |                              |
| Pbp5           | 9C |       |       |      | CurveFitFailed               |
| penA           | 9C | 34.86 | 82.45 | 1.78 | MultipleMeltPeaks            |
| pikR1          | 9C |       |       |      | CurveFitFailed               |
| pikR2          | 9C | 32.76 | 82.76 | 1.86 |                              |
| pmrA           | 9C | 29    | 79.66 | 2.11 |                              |
| pncA           | 9C | 37.77 | 81.86 | 1.68 |                              |
| putative multi | 9C | 31.69 | 84.75 | 1.99 |                              |
| qac            | 9C | 37.04 | 81.91 | 1.86 |                              |
| qacA           | 9C | 37.14 | 70.34 | 1.91 |                              |
| qacA/qacB      | 9C |       |       |      | BadR2, LowEfficiency, CtIsS  |
| qacEdelta1-0   | 9C |       |       |      | LowEfficiency, CtIsSmall, Ci |
| qacEdelta1-0   | 9C | 28.68 | 77.72 | 2.01 |                              |
| qacH-01        | 9C | 33.73 | 85.84 | 1.96 |                              |
| qacH-02        | 9C | 34.79 | 84.34 | 1.84 |                              |
| qnrA           | 9C | 38.3  | 78.59 | 1.89 |                              |

|              |    |       |       |      |                                          |
|--------------|----|-------|-------|------|------------------------------------------|
| rarD-02      | 9C | 36.88 | 80.65 | 2    | MultipleMeltPeaks                        |
| sat4         | 9C |       |       |      | LowEfficiency, CtIsSmall, S <sub>e</sub> |
| sdeB         | 9C |       |       |      | CurveFitFailed                           |
| spcN-01      | 9C |       |       |      | NoAmplification                          |
| speA         | 9C |       |       |      | NoAmplification                          |
| str          | 9C |       |       |      | CurveFitFailed                           |
| strA         | 9C |       |       |      | LowEfficiency, CtIsSmall, S <sub>e</sub> |
| strB         | 9C |       |       |      | LowEfficiency, CtIsSmall, S <sub>e</sub> |
| sul1         | 9C | 33.43 | 86.24 | 1.99 | MultipleMeltPeaks                        |
| sul2         | 9C |       |       |      | LowEfficiency, CtIsSmall, C <sub>i</sub> |
| sulA/foIP-01 | 9C | 28.88 | 81.88 | 1.97 |                                          |
| sulA/foIP-03 | 9C | 29.64 | 83.54 | 1.89 |                                          |
| tet(32)      | 9C |       |       |      | NoAmplification                          |
| tet(34)      | 9C | 27.09 | 76.4  | 2.06 |                                          |
| tet(35)      | 9C | 34.32 | 76.34 | 2.02 |                                          |
| tet(36)-A    | 9C |       |       |      | NoAmplification                          |
| tet(36)-B    | 9C |       |       |      | CurveFitFailed                           |
| tet(37)      | 9C | 31.03 | 76.15 | 1.99 |                                          |
| tetA-01      | 9C | 30.9  | 85.15 | 1.92 |                                          |
| tetA-02      | 9C | 33.28 | 83.74 | 1.96 |                                          |
| tetB-01      | 9C | 32.93 | 86.41 | 1.97 |                                          |
| tetB-02      | 9C | 33.91 | 76.17 | 1.96 | MultipleMeltPeaks                        |
| tetC-01      | 9C |       |       |      | NoAmplification                          |
| tetC-02      | 9C | 37.86 | 76.25 | 1.92 | MultipleMeltPeaks                        |
| tetD-01      | 9C |       |       |      | CurveFitFailed                           |
| tetD-02      | 9C | 41.63 | 76.01 | 1.63 | MultipleMeltPeaks                        |
| tetE         | 9C |       |       |      | NoAmplification                          |
| tetG-01      | 9C | 34.54 | 82.27 | 1.91 | MultipleMeltPeaks                        |
| tetG-02      | 9C |       |       |      | CurveFitFailed                           |
| tetH         | 9C |       |       |      | NoAmplification                          |
| tetJ         | 9C |       |       |      | LowEfficiency, CtIsSmall, C <sub>i</sub> |
| tetK         | 9C |       |       |      | LowEfficiency, CtIsSmall, S <sub>e</sub> |
| tetL-01      | 9C |       |       |      | CurveFitFailed                           |
| tetL-02      | 9C | 36.76 | 85.43 | 1.69 |                                          |
| tetM-01      | 9C | 26.55 | 75.67 | 2.01 |                                          |
| tetM-02      | 9C | 27.46 | 78.04 | 2.02 |                                          |
| tetO-01      | 9C |       |       |      | LowEfficiency, CtIsSmall, S <sub>e</sub> |
| tetPA        | 9C |       |       |      | LowEfficiency, CtIsSmall, C <sub>i</sub> |
| tetPB-01     | 9C |       |       |      | NoAmplification                          |
| tetPB-02     | 9C | 32.65 | 85.15 | 2.02 |                                          |
| tetPB-03     | 9C |       |       |      | LowEfficiency, CtIsSmall, S <sub>e</sub> |
| tetPB-05     | 9C |       |       |      | NoAmplification                          |
| tetQ         | 9C |       |       |      | CurveFitFailed                           |
| tetR-02      | 9C | 31.78 | 82.56 | 1.95 |                                          |
| tetR-03      | 9C |       |       |      | CurveFitFailed                           |
| tetS         | 9C | 36.22 | 78.92 | 1.97 | MultipleMeltPeaks                        |

|             |    |       |       |      |                              |
|-------------|----|-------|-------|------|------------------------------|
| tetT        | 9C | 35.27 | 75.69 | 1.9  |                              |
| tetU-01     | 9C |       |       |      | LowEfficiency, CtIsSmall, Ci |
| tetV        | 9C |       |       |      | BadR2, LowEfficiency, CtIsS  |
| tetW-01     | 9C |       |       |      | NoAmplification              |
| tetX        | 9C |       |       |      | NoAmplification              |
| tnpA-01     | 9C | 37.73 | 79.58 | 2.01 |                              |
| tnpA-02     | 9C | 36.87 | 80.94 | 1.74 | MultipleMeltPeaks            |
| tnpA-03     | 9C | 30.5  | 75.78 | 2.16 |                              |
| tnpA-04     | 9C | 32.71 | 75.19 | 1.75 | MultipleMeltPeaks            |
| tnpA-05     | 9C | 37.89 | 76.25 | 1.8  |                              |
| tnpA-07     | 9C |       |       |      | NoAmplification              |
| tolC-01     | 9C | 35.8  | 80.32 | 1.81 |                              |
| tolC-02     | 9C | 29.91 | 87.48 | 1.98 |                              |
| tolC-03     | 9C | 30.82 | 85.96 | 1.96 |                              |
| Tp614       | 9C | 34.73 | 86.03 | 1.89 |                              |
| ttgA        | 9C | 36.36 | 81.96 | 1.83 |                              |
| ttgB        | 9C | 31.66 | 84.75 | 1.96 |                              |
| vanA        | 9C |       |       |      | NoAmplification              |
| vanB-01     | 9C |       |       |      | CurveFitFailed               |
| vanC-01     | 9C |       |       |      | CurveFitFailed               |
| vanC-02     | 9C |       |       |      | LowEfficiency, CtIsSmall, Ci |
| vanC-03     | 9C | 27.2  | 85.89 | 1.99 |                              |
| vanC1       | 9C |       |       |      | LowEfficiency, CtIsSmall, Ci |
| vanC2/vanC3 | 9C | 32.63 | 82.84 | 2.05 |                              |
| vanG        | 9C |       |       |      | CurveFitFailed               |
| vanHB       | 9C | 38.76 | 81.55 | 1.79 | MultipleMeltPeaks            |
| vanHD       | 9C | 42.99 | 82.32 | 1.69 | MultipleMeltPeaks            |
| vanRA-01    | 9C |       |       |      | CurveFitFailed               |
| vanRA-02    | 9C |       |       |      | NoAmplification              |
| vanRB       | 9C | 33.44 | 87.51 | 1.96 |                              |
| vanRC       | 9C |       |       |      | LowEfficiency, CtIsSmall, S: |
| vanRC4      | 9C |       |       |      | CurveFitFailed               |
| vanRD       | 9C |       |       |      | NoAmplification              |
| vanSA       | 9C |       |       |      | CurveFitFailed               |
| vanSB       | 9C | 27.74 | 75.26 | 2.1  |                              |
| vanSC-01    | 9C | 35.64 | 84.59 | 2.01 | MultipleMeltPeaks            |
| vanSC-02    | 9C |       |       |      | NoAmplification              |
| vanTC-01    | 9C |       |       |      | CurveFitFailed               |
| vanTC-02    | 9C |       |       |      | CurveFitFailed               |
| vanTE       | 9C |       |       |      | CurveFitFailed               |
| vanTG       | 9C |       |       |      | NoAmplification              |
| vanWB       | 9C |       |       |      | CurveFitFailed               |
| vanWG       | 9C | 36.98 | 83.44 | 1.87 |                              |
| vanXA       | 9C | 37.34 | 77.2  | 1.84 |                              |
| vanXB       | 9C |       |       |      | NoAmplification              |
| vanXD       | 9C | 28.91 | 75.82 | 2.1  |                              |

|              |    |       |       |      |                              |
|--------------|----|-------|-------|------|------------------------------|
| vanYB        | 9C | 33.81 | 75.44 | 1.95 | MultipleMeltPeaks            |
| vanYD-01     | 9C | 30.47 | 85.89 | 1.85 |                              |
| vanYD-02     | 9C | 35.03 | 74.36 | 1.95 | MultipleMeltPeaks            |
| vatB-01      | 9C |       |       |      | CurveFitFailed               |
| vatB-02      | 9C | 31.23 | 75.22 | 2.02 | MultipleMeltPeaks            |
| vatC-01      | 9C | 36.23 | 77.66 | 1.78 | MultipleMeltPeaks            |
| vatC-02      | 9C | 37.78 | 86.21 | 1.81 | MultipleMeltPeaks            |
| vatE-01      | 9C | 26.93 | 77.34 | 2.1  |                              |
| vatE-02      | 9C |       |       |      | NoAmplification              |
| vgaA-01      | 9C | 41.97 | 86.49 | 1.65 | MultipleMeltPeaks            |
| vgaA-02      | 9C | 36.07 | 86.74 | 1.75 | MultipleMeltPeaks            |
| vgb-01       | 9C | 36.86 | 76.37 | 1.94 |                              |
| vgbB-01      | 9C | 37.72 | 76.35 | 1.69 | MultipleMeltPeaks            |
| vgbB-02      | 9C |       |       |      | LowEfficiency, CtIsSmall, S: |
| yceE/mdtG-0  | 9C |       |       |      | CurveFitFailed               |
| yceE/mdtG-0  | 9C |       |       |      | NoAmplification              |
| yceL/mdtH-0  | 9C | 30.71 | 85.87 | 1.94 |                              |
| yceL/mdtH-0  | 9C |       |       |      | NoAmplification              |
| yceL/mdtH-0  | 9C | 33.96 | 80.63 | 1.98 |                              |
| yidY/mdtL-01 | 9C | 29.88 | 84.61 | 1.95 |                              |
| yidY/mdtL-02 | 9C |       |       |      | CurveFitFailed               |































| Assay          | Sample | Ct    | Tm    | Efficiency | flag            |
|----------------|--------|-------|-------|------------|-----------------|
| 16S rRNA       | 10A    |       | 23.82 | 81.96      | 2.01            |
| aac            | 10A    |       |       |            | NoAmplification |
| aac(6')-Ib(akz | 10A    |       |       |            | NoAmplification |
| aac(6')-Ib(akz | 10A    |       |       |            | NoAmplification |
| aac(6')-Ib(akz | 10A    |       |       |            | NoAmplification |
| aac(6')-II     | 10A    |       |       |            | NoAmplification |
| aac(6')I1      | 10A    |       |       |            | NoAmplification |
| aacA/aphD      | 10A    |       |       |            | NoAmplification |
| aacC           | 10A    |       |       |            | NoAmplification |
| aacC1          | 10A    |       |       |            | NoAmplification |
| aacC2          | 10A    |       |       |            | NoAmplification |
| aacC4          | 10A    |       |       |            | NoAmplification |
| aadA-01        | 10A    |       |       |            | NoAmplification |
| aadA-02        | 10A    |       |       |            | NoAmplification |
| aadA-1-01      | 10A    |       |       |            | NoAmplification |
| aadA-1-02      | 10A    |       |       |            | NoAmplification |
| aadA1          | 10A    |       |       |            | NoAmplification |
| aadA2-01       | 10A    |       |       |            | NoAmplification |
| aadA2-02       | 10A    |       |       |            | NoAmplification |
| aadA2-03       | 10A    |       |       |            | NoAmplification |
| aadA5-01       | 10A    |       |       |            | NoAmplification |
| aadA5-02       | 10A    |       |       |            | NoAmplification |
| aadA9-01       | 10A    |       |       |            | NoAmplification |
| aadA9-02       | 10A    |       |       |            | NoAmplification |
| aadD           | 10A    |       |       |            | NoAmplification |
| aadE           | 10A    |       |       |            | NoAmplification |
| acrA-01        | 10A    |       |       |            | NoAmplification |
| acrA-02        | 10A    |       |       |            | NoAmplification |
| acrA-03        | 10A    |       |       |            | NoAmplification |
| acrA-04        | 10A    |       |       |            | NoAmplification |
| acrA-05        | 10A    |       |       |            | NoAmplification |
| acrB-01        | 10A    | 33.82 | 76.32 | 2.02       |                 |
| acrF           | 10A    |       |       |            | NoAmplification |
| acrR-01        | 10A    |       |       |            | NoAmplification |
| acrR-02        | 10A    |       |       |            | NoAmplification |
| Actin          | 10A    | 27.75 | 83.26 | 1.9        |                 |
| adeA           | 10A    |       |       |            | NoAmplification |
| ampC-01        | 10A    |       |       |            | NoAmplification |
| ampC-02        | 10A    |       |       |            | NoAmplification |
| ampC-04        | 10A    |       |       |            | NoAmplification |
| ampC-05        | 10A    |       |       |            | NoAmplification |
| ampC-06        | 10A    |       |       |            | NoAmplification |
| ampC-07        | 10A    |       |       |            | NoAmplification |
| ampC-09        | 10A    |       |       |            | NoAmplification |
| ampC/blaDH     | 10A    |       |       |            | NoAmplification |

|                          |     |       |       |                 |
|--------------------------|-----|-------|-------|-----------------|
| aph                      | 10A |       |       | NoAmplification |
| aph(2')-Id-01            | 10A |       |       | NoAmplification |
| aph(2')-Id-02            | 10A |       |       | NoAmplification |
| aph6ia                   | 10A |       |       | NoAmplification |
| aphA1(aka k <sub>z</sub> | 10A |       |       | NoAmplification |
| bacA-01                  | 10A |       |       | NoAmplification |
| bacA-02                  | 10A |       |       | NoAmplification |
| BETA-globin              | 10A |       |       | NoAmplification |
| bla-ACC-1                | 10A |       |       | NoAmplification |
| bla-L1                   | 10A |       |       | NoAmplification |
| bla1                     | 10A |       |       | NoAmplification |
| blaCMY                   | 10A |       |       | NoAmplification |
| blaCMY2-01               | 10A |       |       | NoAmplification |
| blaCMY2-02               | 10A |       |       | NoAmplification |
| blaCTX-M-01              | 10A | 39.8  | 75.79 | 2.01            |
| blaCTX-M-02              | 10A |       |       | NoAmplification |
| blaCTX-M-03              | 10A |       |       | NoAmplification |
| blaCTX-M-04              | 10A |       |       | NoAmplification |
| blaCTX-M-05              | 10A | 44.42 | 74.79 | 1.42            |
| blaCTX-M-06              | 10A |       |       | NoAmplification |
| blaGES                   | 10A |       |       | NoAmplification |
| blaIMP-01                | 10A |       |       | NoAmplification |
| blaIMP-02                | 10A |       |       | NoAmplification |
| blaMOX/blaC              | 10A |       |       | NoAmplification |
| blaOCH                   | 10A |       |       | NoAmplification |
| blaOKP                   | 10A |       |       | NoAmplification |
| blaOXA1/blaC             | 10A |       |       | NoAmplification |
| blaOXA10-01              | 10A |       |       | NoAmplification |
| blaOXA10-02              | 10A |       |       | NoAmplification |
| blaOXY                   | 10A |       |       | NoAmplification |
| blaPAO                   | 10A |       |       | NoAmplification |
| blaPER                   | 10A |       |       | NoAmplification |
| blaPSE                   | 10A |       |       | NoAmplification |
| blaROB                   | 10A |       |       | NoAmplification |
| blaSFO                   | 10A |       |       | NoAmplification |
| blaSHV-01                | 10A |       |       | NoAmplification |
| blaSHV-02                | 10A |       |       | NoAmplification |
| blaTEM                   | 10A |       |       | NoAmplification |
| blaTLA                   | 10A |       |       | NoAmplification |
| blaVEB                   | 10A |       |       | NoAmplification |
| blaVIM                   | 10A |       |       | NoAmplification |
| blaZ                     | 10A |       |       | NoAmplification |
| carB                     | 10A |       |       | NoAmplification |
| catA1                    | 10A |       |       | NoAmplification |
| catB3                    | 10A |       |       | NoAmplification |
| catB8                    | 10A |       |       | NoAmplification |

|            |     |       |       |      |                             |
|------------|-----|-------|-------|------|-----------------------------|
| ceoA       | 10A |       |       |      | NoAmplification             |
| cepA       | 10A |       |       |      | NoAmplification             |
| cfiA       | 10A |       |       |      | NoAmplification             |
| cfr        | 10A |       |       |      | NoAmplification             |
| cfxA       | 10A |       |       |      | NoAmplification             |
| cmeA       | 10A |       |       |      | NoAmplification             |
| cmlA1-01   | 10A |       |       |      | NoAmplification             |
| cmlA1-02   | 10A |       |       |      | NoAmplification             |
| cmr        | 10A |       |       |      | NoAmplification             |
| cmx(A)     | 10A |       |       |      | CurveFitFailed              |
| cphA-01    | 10A |       |       |      | NoAmplification             |
| cphA-02    | 10A |       |       |      | CurveFitFailed              |
| dfrA1      | 10A |       |       |      | NoAmplification             |
| dfrA12     | 10A |       |       |      | NoAmplification             |
| emrD       | 10A |       |       |      | NoAmplification             |
| ereA       | 10A |       |       |      | NoAmplification             |
| ereB       | 10A |       |       |      | NoAmplification             |
| erm(34)    | 10A |       |       |      | NoAmplification             |
| erm(35)    | 10A |       |       |      | NoAmplification             |
| erm(36)    | 10A |       |       |      | NoAmplification             |
| ermA       | 10A |       |       |      | NoAmplification             |
| ermA/ermTR | 10A |       |       |      | NoAmplification             |
| ermB       | 10A | 26.88 | 74.74 | 2.07 |                             |
| ermC       | 10A |       |       |      | NoAmplification             |
| ermF       | 10A |       |       |      | NoAmplification             |
| ermJ/ermD  | 10A |       |       |      | NoAmplification             |
| ermK-01    | 10A |       |       |      | NoAmplification             |
| ermK-02    | 10A |       |       |      | NoAmplification             |
| ermT-01    | 10A |       |       |      | NoAmplification             |
| ermT-02    | 10A |       |       |      | NoAmplification             |
| ermX       | 10A |       |       |      | NoAmplification             |
| ermY       | 10A |       |       |      | NoAmplification             |
| fabK       | 10A |       |       |      | NoAmplification             |
| floR       | 10A |       |       |      | NoAmplification             |
| folA       | 10A |       |       |      | NoAmplification             |
| fosB       | 10A |       |       |      | LowEfficiency, CtlSmall, S: |
| fosX       | 10A |       |       |      | NoAmplification             |
| fox5       | 10A |       |       |      | NoAmplification             |
| imiR       | 10A |       |       |      | NoAmplification             |
| ImrA-01    | 10A |       |       |      | NoAmplification             |
| intl       | 10A |       |       |      | NoAmplification             |
| intl1      | 10A | 23.68 | 86.44 | 2    |                             |
| IS613      | 10A |       |       |      | NoAmplification             |
| lnuA-01    | 10A |       |       |      | NoAmplification             |
| lnuB-01    | 10A |       |       |      | NoAmplification             |
| lnuB-02    | 10A |       |       |      | NoAmplification             |

|                |     |       |       |      |                 |
|----------------|-----|-------|-------|------|-----------------|
| lnuC           | 10A |       |       |      | NoAmplification |
| marR-01        | 10A |       |       |      | CurveFitFailed  |
| matA/mel       | 10A | 29.34 | 77.17 | 2.01 |                 |
| mdet1          | 10A |       |       |      | NoAmplification |
| mdtA           | 10A |       |       |      | NoAmplification |
| mdtE/yhiU      | 10A |       |       |      | NoAmplification |
| mecA           | 10A |       |       |      | NoAmplification |
| mefA           | 10A | 25.29 | 80.62 | 1.96 |                 |
| mepA           | 10A |       |       |      | CurveFitFailed  |
| mexA           | 10A |       |       |      | NoAmplification |
| mexD           | 10A |       |       |      | NoAmplification |
| mexE           | 10A |       |       |      | NoAmplification |
| mexF           | 10A |       |       |      | NoAmplification |
| mphA-01        | 10A |       |       |      | NoAmplification |
| mphA-02        | 10A | 36.24 | 75.79 | 2.23 |                 |
| mphB           | 10A |       |       |      | CurveFitFailed  |
| mphC           | 10A |       |       |      | NoAmplification |
| msrA-01        | 10A |       |       |      | NoAmplification |
| msrC-01        | 10A |       |       |      | NoAmplification |
| mtrC-01        | 10A |       |       |      | NoAmplification |
| mtrC-02        | 10A |       |       |      | NoAmplification |
| mtrD-02        | 10A |       |       |      | NoAmplification |
| mtrD-03        | 10A |       |       |      | NoAmplification |
| NDM1           | 10A |       |       |      | NoAmplification |
| nimE           | 10A |       |       |      | CurveFitFailed  |
| nisB           | 10A |       |       |      | NoAmplification |
| oleC           | 10A |       |       |      | NoAmplification |
| oprD           | 10A |       |       |      | CurveFitFailed  |
| oprJ           | 10A |       |       |      | NoAmplification |
| pbp            | 10A |       |       |      | NoAmplification |
| pbp2x          | 10A |       |       |      | NoAmplification |
| Pbp5           | 10A |       |       |      | NoAmplification |
| penA           | 10A |       |       |      | NoAmplification |
| pikR1          | 10A |       |       |      | NoAmplification |
| pikR2          | 10A |       |       |      | NoAmplification |
| pmrA           | 10A |       |       |      | NoAmplification |
| pncA           | 10A |       |       |      | NoAmplification |
| putative multi | 10A |       |       |      | NoAmplification |
| qac            | 10A |       |       |      | NoAmplification |
| qacA           | 10A | 37.73 | 69.85 | 1.82 |                 |
| qacA/qacB      | 10A |       |       |      | NoAmplification |
| qacEdelta1-0   | 10A |       |       |      | NoAmplification |
| qacEdelta1-0   | 10A |       |       |      | NoAmplification |
| qacH-01        | 10A |       |       |      | NoAmplification |
| qacH-02        | 10A |       |       |      | NoAmplification |
| qnrA           | 10A |       |       |      | NoAmplification |



|              |     |       |       |      |                 |
|--------------|-----|-------|-------|------|-----------------|
| rarD-02      | 10A |       |       |      | NoAmplification |
| sat4         | 10A |       |       |      | NoAmplification |
| sdeB         | 10A |       |       |      | NoAmplification |
| spcN-01      | 10A |       |       |      | NoAmplification |
| speA         | 10A |       |       |      | NoAmplification |
| str          | 10A |       |       |      | NoAmplification |
| strA         | 10A |       |       |      | NoAmplification |
| strB         | 10A |       |       |      | NoAmplification |
| sul1         | 10A |       |       |      | NoAmplification |
| sul2         | 10A |       |       |      | NoAmplification |
| sulA/foIP-01 | 10A |       |       |      | NoAmplification |
| sulA/foIP-03 | 10A | 30.95 | 83.86 | 1.92 |                 |
| tet(32)      | 10A |       |       |      | NoAmplification |
| tet(34)      | 10A | 28.41 | 75.85 | 2.03 |                 |
| tet(35)      | 10A |       |       |      | NoAmplification |
| tet(36)-A    | 10A |       |       |      | NoAmplification |
| tet(36)-B    | 10A |       |       |      | NoAmplification |
| tet(37)      | 10A |       |       |      | CurveFitFailed  |
| tetA-01      | 10A |       |       |      | NoAmplification |
| tetA-02      | 10A |       |       |      | NoAmplification |
| tetB-01      | 10A |       |       |      | NoAmplification |
| tetB-02      | 10A |       |       |      | CurveFitFailed  |
| tetC-01      | 10A |       |       |      | NoAmplification |
| tetC-02      | 10A |       |       |      | NoAmplification |
| tetD-01      | 10A |       |       |      | NoAmplification |
| tetD-02      | 10A |       |       |      | NoAmplification |
| tetE         | 10A |       |       |      | NoAmplification |
| tetG-01      | 10A |       |       |      | NoAmplification |
| tetG-02      | 10A |       |       |      | NoAmplification |
| tetH         | 10A |       |       |      | NoAmplification |
| tetJ         | 10A |       |       |      | NoAmplification |
| tetK         | 10A |       |       |      | NoAmplification |
| tetL-01      | 10A |       |       |      | NoAmplification |
| tetL-02      | 10A |       |       |      | NoAmplification |
| tetM-01      | 10A |       |       |      | CurveFitFailed  |
| tetM-02      | 10A |       |       |      | NoAmplification |
| tetO-01      | 10A |       |       |      | NoAmplification |
| tetPA        | 10A |       |       |      | NoAmplification |
| tetPB-01     | 10A |       |       |      | NoAmplification |
| tetPB-02     | 10A |       |       |      | NoAmplification |
| tetPB-03     | 10A |       |       |      | NoAmplification |
| tetPB-05     | 10A |       |       |      | NoAmplification |
| tetQ         | 10A |       |       |      | NoAmplification |
| tetR-02      | 10A |       |       |      | NoAmplification |
| tetR-03      | 10A |       |       |      | NoAmplification |
| tetS         | 10A |       |       |      | NoAmplification |

|             |     |       |       |      |                             |
|-------------|-----|-------|-------|------|-----------------------------|
| tetT        | 10A |       |       |      | NoAmplification             |
| tetU-01     | 10A |       |       |      | NoAmplification             |
| tetV        | 10A |       |       |      | NoAmplification             |
| tetW-01     | 10A |       |       |      | NoAmplification             |
| tetX        | 10A |       |       |      | NoAmplification             |
| tnpA-01     | 10A |       |       |      | NoAmplification             |
| tnpA-02     | 10A |       |       |      | NoAmplification             |
| tnpA-03     | 10A |       |       |      | CurveFitFailed              |
| tnpA-04     | 10A |       |       |      | NoAmplification             |
| tnpA-05     | 10A |       |       |      | NoAmplification             |
| tnpA-07     | 10A |       |       |      | NoAmplification             |
| tolC-01     | 10A |       |       |      | NoAmplification             |
| tolC-02     | 10A | 35.32 | 77.56 | 1.89 |                             |
| tolC-03     | 10A |       |       |      | NoAmplification             |
| Tp614       | 10A |       |       |      | NoAmplification             |
| ttgA        | 10A |       |       |      | NoAmplification             |
| ttgB        | 10A |       |       |      | NoAmplification             |
| vanA        | 10A |       |       |      | NoAmplification             |
| vanB-01     | 10A |       |       |      | NoAmplification             |
| vanC-01     | 10A |       |       |      | NoAmplification             |
| vanC-02     | 10A |       |       |      | NoAmplification             |
| vanC-03     | 10A |       |       |      | NoAmplification             |
| vanC1       | 10A |       |       |      | NoAmplification             |
| vanC2/vanC3 | 10A |       |       |      | NoAmplification             |
| vanG        | 10A |       |       |      | NoAmplification             |
| vanHB       | 10A |       |       |      | NoAmplification             |
| vanHD       | 10A |       |       |      | NoAmplification             |
| vanRA-01    | 10A |       |       |      | NoAmplification             |
| vanRA-02    | 10A |       |       |      | NoAmplification             |
| vanRB       | 10A |       |       |      | NoAmplification             |
| vanRC       | 10A |       |       |      | NoAmplification             |
| vanRC4      | 10A |       |       |      | NoAmplification             |
| vanRD       | 10A |       |       |      | NoAmplification             |
| vanSA       | 10A |       |       |      | NoAmplification             |
| vanSB       | 10A | 26.77 | 74.65 | 2.08 |                             |
| vanSC-01    | 10A |       |       |      | NoAmplification             |
| vanSC-02    | 10A |       |       |      | NoAmplification             |
| vanTC-01    | 10A |       |       |      | NoAmplification             |
| vanTC-02    | 10A |       |       |      | NoAmplification             |
| vanTE       | 10A |       |       |      | NoAmplification             |
| vanTG       | 10A |       |       |      | NoAmplification             |
| vanWB       | 10A |       |       |      | NoAmplification             |
| vanWG       | 10A |       |       |      | CurveFitFailed              |
| vanXA       | 10A |       |       |      | LowEfficiency, CurveFitFail |
| vanXB       | 10A |       |       |      | NoAmplification             |
| vanXD       | 10A | 31    | 74.67 | 2.01 |                             |

|              |     |       |       |      |                             |
|--------------|-----|-------|-------|------|-----------------------------|
| vanYB        | 10A |       |       |      | NoAmplification             |
| vanYD-01     | 10A |       |       |      | LowEfficiency, SaturationB: |
| vanYD-02     | 10A |       |       |      | NoAmplification             |
| vatB-01      | 10A |       |       |      | NoAmplification             |
| vatB-02      | 10A |       |       |      | NoAmplification             |
| vatC-01      | 10A |       |       |      | NoAmplification             |
| vatC-02      | 10A |       |       |      | NoAmplification             |
| vatE-01      | 10A | 27.19 | 77.16 | 2.12 |                             |
| vatE-02      | 10A |       |       |      | NoAmplification             |
| vgaA-01      | 10A |       |       |      | NoAmplification             |
| vgaA-02      | 10A |       |       |      | NoAmplification             |
| vgb-01       | 10A |       |       |      | NoAmplification             |
| vgbB-01      | 10A |       |       |      | NoAmplification             |
| vgbB-02      | 10A |       |       |      | NoAmplification             |
| yceE/mdtG-0  | 10A |       |       |      | NoAmplification             |
| yceE/mdtG-0  | 10A |       |       |      | NoAmplification             |
| yceL/mdtH-0  | 10A |       |       |      | NoAmplification             |
| yceL/mdtH-0  | 10A |       |       |      | NoAmplification             |
| yceL/mdtH-0  | 10A |       |       |      | NoAmplification             |
| yidY/mdtL-01 | 10A |       |       |      | NoAmplification             |
| yidY/mdtL-02 | 10A |       |       |      | NoAmplification             |































| Assay           | Sample | Ct | Tm    | Efficiency | flag                                 |
|-----------------|--------|----|-------|------------|--------------------------------------|
| 16S rRNA        | 10B    |    | 20.57 | 81.93      | 1.94                                 |
| aac             | 10B    |    | 28.89 | 85.67      | 1.74 LowEfficiency, SaturationBaseli |
| aac(6')-Ib(akz) | 10B    |    |       |            | LowEfficiency, CtIsSmall, CtIsLarge  |
| aac(6')-Ib(akz) | 10B    |    | 29.47 | 85.97      | 1.99                                 |
| aac(6')-Ib(akz) | 10B    |    | 31.41 | 76.1       | 2.02 CtIsLarge, MultipleMeltPeaks    |
| aac(6')-II      | 10B    |    | 32.4  | 85.22      | 1.83 CtIsLarge, MultipleMeltPeaks    |
| aac(6')I1       | 10B    |    | 33.75 | 82.48      | 1.9 CtIsLarge, MultipleMeltPeaks     |
| aacA/aphD       | 10B    |    |       |            | LowEfficiency, CtIsSmall, CtIsLarge  |
| aacC            | 10B    |    | 30.78 | 85.92      | 1.92 CtIsLarge, MultipleMeltPeaks    |
| aacC1           | 10B    |    |       |            | NoAmplification                      |
| aacC2           | 10B    |    |       |            | NoAmplification                      |
| aacC4           | 10B    |    | 34.95 | 90.11      | 1.81 CtIsLarge, SaturationBaseli     |
| aadA-01         | 10B    |    |       |            | LowEfficiency, CtIsSmall, CtIsLarge  |
| aadA-02         | 10B    |    |       |            | LowEfficiency, CtIsSmall, CtIsLarge  |
| aadA-1-01       | 10B    |    |       |            | CtIsLarge, CurveFitFailed            |
| aadA-1-02       | 10B    |    |       |            | LowEfficiency, CtIsSmall, CtIsLarge  |
| aadA1           | 10B    |    | 34.6  | 79.1       | 1.98 CtIsLarge                       |
| aadA2-01        | 10B    |    | 34.47 | 79.74      | 1.89 CtIsLarge                       |
| aadA2-02        | 10B    |    | 32.02 | 75.1       | 1.94 CtIsLarge, SaturationBaseli     |
| aadA2-03        | 10B    |    |       |            | LowEfficiency, CtIsSmall, CtIsLarge  |
| aadA5-01        | 10B    |    | 33.64 | 82.91      | 2.02 CtIsLarge                       |
| aadA5-02        | 10B    |    | 34.24 | 83.02      | 1.92 CtIsLarge, MultipleMeltPeaks    |
| aadA9-01        | 10B    |    |       |            | CtIsLarge, CurveFitFailed            |
| aadA9-02        | 10B    |    |       |            | CtIsLarge, CurveFitFailed            |
| aadD            | 10B    |    |       |            | LowEfficiency, CtIsSmall, CtIsLarge  |
| aadE            | 10B    |    |       |            | LowEfficiency, CtIsSmall, CtIsLarge  |
| acrA-01         | 10B    |    | 30.64 | 88.67      | 1.93 CtIsLarge                       |
| acrA-02         | 10B    |    |       |            | CtIsLarge, CurveFitFailed            |
| acrA-03         | 10B    |    |       |            | BadR2, LowEfficiency, CtIsSmall      |
| acrA-04         | 10B    |    | 29.29 | 80.61      | 1.97 MultipleMeltPeaks               |
| acrA-05         | 10B    |    | 29.85 | 88.51      | 1.97 CtIsLarge                       |
| acrB-01         | 10B    |    |       |            | CtIsLarge, CurveFitFailed            |
| acrF            | 10B    |    | 26.38 | 82.8       | 1.76 LowEfficiency                   |
| acrR-01         | 10B    |    | 30.63 | 83.1       | 1.99 CtIsLarge, MultipleMeltPeaks    |
| acrR-02         | 10B    |    | 31.99 | 85.24      | 1.94 CtIsLarge, MultipleMeltPeaks    |
| Actin           | 10B    |    | 20.93 | 86.76      | 1.95                                 |
| adeA            | 10B    |    |       |            | CtIsLarge, CurveFitFailed            |
| ampC-01         | 10B    |    | 31.57 | 85.29      | 2.01 CtIsLarge                       |
| ampC-02         | 10B    |    |       |            | CurveFitFailed                       |
| ampC-04         | 10B    |    | 31.91 | 78.41      | 1.86 CtIsLarge, MultipleMeltPeaks    |
| ampC-05         | 10B    |    |       |            | LowEfficiency, CtIsSmall, CtIsLarge  |
| ampC-06         | 10B    |    | 29.16 | 84.36      | 1.92                                 |
| ampC-07         | 10B    |    | 34.98 | 87.97      | 1.77 LowEfficiency, CtIsLarge        |
| ampC-09         | 10B    |    |       |            | LowEfficiency, CtIsSmall, CtIsLarge  |
| ampC/blaDH      | 10B    |    | 28.53 | 84.81      | 1.99 MultipleMeltPeaks               |

|               |     |       |       |      |                              |
|---------------|-----|-------|-------|------|------------------------------|
| aph           | 10B |       |       |      | LowEfficiency, CtIsSmall, Ci |
| aph(2')-Id-01 | 10B |       |       |      | LowEfficiency, CtIsSmall, Ci |
| aph(2')-Id-02 | 10B |       |       |      | LowEfficiency, CtIsSmall, Ci |
| aph6ia        | 10B | 30.08 | 77.6  | 2    | CtIsLarge, MultipleMeltPeaks |
| aphA1(aka k2) | 10B |       |       |      | LowEfficiency, CtIsSmall, S2 |
| bacA-01       | 10B |       |       |      | CtIsLarge, CurveFitFailed    |
| bacA-02       | 10B | 32.71 | 87.71 | 1.84 | CtIsLarge                    |
| BETA-globin   | 10B | 21.16 | 83.98 | 2.04 |                              |
| bla-ACC-1     | 10B |       |       |      | LowEfficiency, CtIsLarge, Ci |
| bla-L1        | 10B | 30.4  | 84.89 | 2.07 | CtIsLarge                    |
| bla1          | 10B |       |       |      | LowEfficiency, CtIsSmall, Ci |
| blaCMY        | 10B |       |       |      | LowEfficiency, CtIsSmall, Ci |
| blaCMY2-01    | 10B |       |       |      | CtIsLarge, CurveFitFailed    |
| blaCMY2-02    | 10B | 28.74 | 85    | 1.96 |                              |
| blaCTX-M-01   | 10B |       |       |      | NoAmplification              |
| blaCTX-M-02   | 10B |       |       |      | CtIsLarge, CurveFitFailed    |
| blaCTX-M-03   | 10B |       |       |      | LowEfficiency, CtIsSmall, Ci |
| blaCTX-M-04   | 10B |       |       |      | CtIsLarge, CurveFitFailed    |
| blaCTX-M-05   | 10B | 34.16 | 76.25 | 1.77 | LowEfficiency, CtIsLarge, S2 |
| blaCTX-M-06   | 10B |       |       |      | LowEfficiency, CtIsSmall, Ci |
| blaGES        | 10B |       |       |      | LowEfficiency, CtIsSmall, S2 |
| blaIMP-01     | 10B |       |       |      | NoAmplification              |
| blaIMP-02     | 10B |       |       |      | CtIsLarge, CurveFitFailed    |
| blaMOX/blaC   | 10B |       |       |      | CtIsLarge, CurveFitFailed    |
| blaOCH        | 10B |       |       |      | NoAmplification              |
| blaOKP        | 10B |       |       |      | NoAmplification              |
| blaOXA1/blaC  | 10B |       |       |      | LowEfficiency, CtIsSmall, Ci |
| blaOXA10-01   | 10B |       |       |      | CtIsLarge, CurveFitFailed    |
| blaOXA10-02   | 10B |       |       |      | CurveFitFailed               |
| blaOXY        | 10B | 34.23 | 85.51 | 1.76 | LowEfficiency, CtIsLarge, M  |
| blaPAO        | 10B |       |       |      | NoAmplification              |
| blaPER        | 10B |       |       |      | LowEfficiency, CtIsSmall, Ci |
| blaPSE        | 10B |       |       |      | NoAmplification              |
| blaROB        | 10B |       |       |      | CurveFitFailed               |
| blaSFO        | 10B | 31.45 | 89.11 | 1.87 | CtIsLarge, MultipleMeltPeaks |
| blaSHV-01     | 10B |       |       |      | LowEfficiency, CtIsSmall, S2 |
| blaSHV-02     | 10B |       |       |      | CtIsLarge, CurveFitFailed    |
| blaTEM        | 10B | 25.12 | 78.96 | 1.75 | LowEfficiency                |
| blaTLA        | 10B |       |       |      | CurveFitFailed               |
| blaVEB        | 10B |       |       |      | NoAmplification              |
| blaVIM        | 10B |       |       |      | NoAmplification              |
| blaZ          | 10B |       |       |      | NoAmplification              |
| carB          | 10B |       |       |      | BadR2, LowEfficiency, CtIsS  |
| catA1         | 10B |       |       |      | NoAmplification              |
| catB3         | 10B | 33.84 | 83.85 | 1.99 | CtIsLarge, MultipleMeltPeaks |
| catB8         | 10B | 27.36 | 82.75 | 2.06 | MultipleMeltPeaks            |

|            |     |       |       |      |                              |
|------------|-----|-------|-------|------|------------------------------|
| ceoA       | 10B | 26.65 | 82.06 | 2.02 | MultipleMeltPeaks            |
| cepA       | 10B |       |       |      | NoAmplification              |
| cfiA       | 10B | 29.33 | 86.37 | 1.7  | LowEfficiency, SaturationB:  |
| cfr        | 10B |       |       |      | LowEfficiency, CtIsSmall, S: |
| cfxA       | 10B | 23.25 | 77.3  | 1.81 |                              |
| cmeA       | 10B |       |       |      | CurveFitFailed               |
| cmlA1-01   | 10B |       |       |      | BadR2, LowEfficiency, CtIsS  |
| cmlA1-02   | 10B | 31.11 | 83.19 | 1.94 | CtIsLarge                    |
| cmr        | 10B |       |       |      | LowEfficiency, CtIsSmall, Ci |
| cmx(A)     | 10B | 26.65 | 86.99 | 2.04 | MultipleMeltPeaks            |
| cphA-01    | 10B | 32.35 | 85.25 | 1.83 | CtIsLarge                    |
| cphA-02    | 10B |       |       |      | CurveFitFailed               |
| dfrA1      | 10B |       |       |      | CtIsLarge, CurveFitFailed    |
| dfrA12     | 10B | 32.38 | 85.66 | 1.72 | LowEfficiency, CtIsLarge     |
| emrD       | 10B |       |       |      | LowEfficiency, CtIsLarge, Ci |
| ereA       | 10B | 32.65 | 82.32 | 1.98 | CtIsLarge                    |
| ereB       | 10B | 34.91 | 85.24 | 1.94 | CtIsLarge, MultipleMeltPe:   |
| erm(34)    | 10B |       |       |      | NoAmplification              |
| erm(35)    | 10B |       |       |      | CurveFitFailed               |
| erm(36)    | 10B | 32.83 | 84.13 | 1.82 | CtIsLarge                    |
| ermA       | 10B |       |       |      | LowEfficiency, CtIsSmall, Ci |
| ermA/ermTR | 10B |       |       |      | NoAmplification              |
| ermB       | 10B | 29.2  | 74.81 | 2.14 |                              |
| ermC       | 10B |       |       |      | LowEfficiency, CtIsSmall, Ci |
| ermF       | 10B |       |       |      | LowEfficiency, CtIsSmall, S: |
| ermJ/ermD  | 10B |       |       |      | LowEfficiency, CtIsSmall, Ci |
| ermK-01    | 10B | 30.33 | 74.2  | 2.02 | CtIsLarge, MultipleMeltPe:   |
| ermK-02    | 10B |       |       |      | LowEfficiency, CtIsLarge, Ci |
| ermT-01    | 10B |       |       |      | LowEfficiency, CtIsSmall, Ci |
| ermT-02    | 10B |       |       |      | BadR2, LowEfficiency, CtIsS  |
| ermX       | 10B |       |       |      | LowEfficiency, CtIsLarge, Ci |
| ermY       | 10B |       |       |      | CurveFitFailed               |
| fabK       | 10B | 25.07 | 79.15 | 2.07 |                              |
| floR       | 10B |       |       |      | CtIsLarge, SaturationBaseli  |
| folA       | 10B |       |       |      | NoAmplification              |
| fosB       | 10B |       |       |      | LowEfficiency, CtIsSmall, S: |
| fosX       | 10B |       |       |      | LowEfficiency, CtIsSmall, Ci |
| fox5       | 10B | 27.2  | 86.52 | 1.82 |                              |
| imiR       | 10B |       |       |      | NoAmplification              |
| ImrA-01    | 10B |       |       |      | CtIsLarge, CurveFitFailed    |
| intl       | 10B | 28.35 | 88.01 | 1.9  |                              |
| intl1      | 10B | 19.41 | 87.22 | 2.02 |                              |
| IS613      | 10B | 26.56 | 78.84 | 1.75 | LowEfficiency                |
| lnuA-01    | 10B |       |       |      | CurveFitFailed               |
| lnuB-01    | 10B |       |       |      | LowEfficiency, CtIsSmall, Ci |
| lnuB-02    | 10B |       |       |      | LowEfficiency, CtIsSmall, Ci |

|                |     |       |       |      |                              |
|----------------|-----|-------|-------|------|------------------------------|
| lnuC           | 10B | 31.03 | 83.67 | 1.99 | CtIsLarge                    |
| marR-01        | 10B | 33.85 | 85.23 | 1.91 | CtIsLarge                    |
| matA/mel       | 10B | 24.65 | 77.03 | 2.01 | MultipleMeltPeaks            |
| mdet1          | 10B |       |       |      | LowEfficiency, CtIsSmall, Ci |
| mdtA           | 10B | 34.87 | 83.78 | 1.83 | CtIsLarge                    |
| mdtE/yhiU      | 10B | 34.45 | 84.41 | 1.9  | CtIsLarge                    |
| mecA           | 10B |       |       |      | NoAmplification              |
| mefA           | 10B | 24.3  | 80.46 | 1.96 |                              |
| mepA           | 10B | 32.42 | 84.71 | 1.99 | CtIsLarge, MultipleMeltPeaks |
| mexA           | 10B | 34.62 | 83.48 | 1.87 | CtIsLarge, MultipleMeltPeaks |
| mexD           | 10B | 30.68 | 80.22 | 2.02 | CtIsLarge                    |
| mexE           | 10B |       |       |      | CtIsLarge, CurveFitFailed    |
| mexF           | 10B | 26.57 | 87.44 | 2.13 |                              |
| mphA-01        | 10B | 29.54 | 86.58 | 1.98 | CtIsLarge, MultipleMeltPeaks |
| mphA-02        | 10B | 28.05 | 86.65 | 2.07 | SaturationBaselineRatioSL    |
| mphB           | 10B |       |       |      | CtIsLarge, CurveFitFailed    |
| mphC           | 10B |       |       |      | LowEfficiency, CtIsLarge, Ci |
| msrA-01        | 10B |       |       |      | LowEfficiency, CtIsSmall, Ci |
| msrC-01        | 10B |       |       |      | NoAmplification              |
| mtrC-01        | 10B |       |       |      | LowEfficiency, CtIsSmall, S2 |
| mtrC-02        | 10B |       |       |      | CtIsLarge, CurveFitFailed    |
| mtrD-02        | 10B | 28.66 | 80.86 | 1.88 | MultipleMeltPeaks            |
| mtrD-03        | 10B | 32.99 | 79.18 | 1.81 | CtIsLarge                    |
| NDM1           | 10B |       |       |      | LowEfficiency, CtIsSmall, Ci |
| nimE           | 10B | 33.2  | 84.91 | 1.89 | CtIsLarge                    |
| nisB           | 10B | 29.69 | 76.96 | 1.97 | CtIsLarge                    |
| oleC           | 10B |       |       |      | LowEfficiency, CtIsLarge, Ci |
| oprD           | 10B | 28.08 | 86.74 | 2.08 |                              |
| oprJ           | 10B |       |       |      | CtIsLarge, CurveFitFailed    |
| pbp            | 10B |       |       |      | LowEfficiency, CtIsSmall, Ci |
| pbp2x          | 10B |       |       |      | NoAmplification              |
| Pbp5           | 10B |       |       |      | LowEfficiency, CtIsSmall, S2 |
| penA           | 10B | 34.53 | 86.62 | 1.78 | LowEfficiency, CtIsLarge     |
| pikR1          | 10B |       |       |      | CtIsLarge, CurveFitFailed    |
| pikR2          | 10B | 30.99 | 84.7  | 2.09 | CtIsLarge, MultipleMeltPeaks |
| pmrA           | 10B | 24.94 | 78.78 | 2.05 |                              |
| pncA           | 10B | 32.61 | 87.87 | 1.87 | CtIsLarge                    |
| putative multi | 10B |       |       |      | CtIsLarge, CurveFitFailed    |
| qac            | 10B |       |       |      | CtIsLarge, CurveFitFailed    |
| qacA           | 10B |       |       |      | LowEfficiency, CtIsSmall, Ci |
| qacA/qacB      | 10B |       |       |      | LowEfficiency, CtIsSmall, S2 |
| qacEdelta1-0   | 10B |       |       |      | LowEfficiency, CtIsSmall, Ci |
| qacEdelta1-0   | 10B | 29.54 | 77.64 | 1.98 | CtIsLarge, MultipleMeltPeaks |
| qacH-01        | 10B | 32.75 | 85.88 | 1.85 | CtIsLarge, MultipleMeltPeaks |
| qacH-02        | 10B |       |       |      | LowEfficiency, CtIsLarge, Ci |
| qnrA           | 10B | 34.1  | 74.02 | 2.05 | CtIsLarge                    |

|              |     |       |       |      |                             |
|--------------|-----|-------|-------|------|-----------------------------|
| rarD-02      | 10B |       |       |      | CtIsLarge, CurveFitFailed   |
| sat4         | 10B |       |       |      | LowEfficiency, CtIsSmall, S |
| sdeB         | 10B |       |       |      | CtIsLarge, CurveFitFailed   |
| spcN-01      | 10B |       |       |      | CurveFitFailed              |
| speA         | 10B |       |       |      | NoAmplification             |
| str          | 10B |       |       |      | LowEfficiency, CtIsSmall, C |
| strA         | 10B |       |       |      | LowEfficiency, CtIsSmall, C |
| strB         | 10B |       |       |      | LowEfficiency, CtIsSmall, C |
| sul1         | 10B | 33.97 | 89.93 | 1.81 | CtIsLarge, SaturationBaseli |
| sul2         | 10B |       |       |      | LowEfficiency, CtIsSmall, C |
| sulA/foIP-01 | 10B | 24.26 | 80.76 | 2.01 |                             |
| sulA/foIP-03 | 10B | 24.06 | 82.79 | 2.02 |                             |
| tet(32)      | 10B | 30.2  | 86.74 | 2.02 | CtIsLarge                   |
| tet(34)      | 10B |       |       |      | LowEfficiency, CtIsLarge, C |
| tet(35)      | 10B | 28.59 | 76.75 | 2.04 | MultipleMeltPeaks           |
| tet(36)-A    | 10B | 33.74 | 76.91 | 1.97 | CtIsLarge                   |
| tet(36)-B    | 10B |       |       |      | LowEfficiency, CtIsLarge, C |
| tet(37)      | 10B | 25.97 | 83.26 | 1.99 |                             |
| tetA-01      | 10B | 23.97 | 75.68 | 1.95 | SaturationBaselineRatiolsL  |
| tetA-02      | 10B | 32.78 | 89.95 | 1.92 | CtIsLarge                   |
| tetB-01      | 10B | 30.24 | 89.29 | 1.98 | CtIsLarge, MultipleMeltPea  |
| tetB-02      | 10B | 29.44 | 79.43 | 2    |                             |
| tetC-01      | 10B | 30.31 | 75    | 1.94 | CtIsLarge                   |
| tetC-02      | 10B |       |       |      | LowEfficiency, CtIsSmall, C |
| tetD-01      | 10B |       |       |      | LowEfficiency, CtIsSmall, C |
| tetD-02      | 10B |       |       |      | LowEfficiency, CtIsLarge, C |
| tetE         | 10B |       |       |      | LowEfficiency, CtIsSmall, C |
| tetG-01      | 10B |       |       |      | LowEfficiency, CtIsSmall, S |
| tetG-02      | 10B |       |       |      | LowEfficiency, CtIsSmall, S |
| tetH         | 10B |       |       |      | LowEfficiency, CtIsSmall, S |
| tetJ         | 10B |       |       |      | LowEfficiency, CtIsSmall, C |
| tetK         | 10B |       |       |      | CurveFitFailed              |
| tetL-01      | 10B |       |       |      | LowEfficiency, CtIsSmall, S |
| tetL-02      | 10B |       |       |      | LowEfficiency, CtIsSmall, S |
| tetM-01      | 10B |       |       |      | LowEfficiency, CtIsSmall, S |
| tetM-02      | 10B | 24.39 | 77.47 | 2    |                             |
| tetO-01      | 10B | 26.22 | 76.61 | 2.09 |                             |
| tetPA        | 10B |       |       |      | NoAmplification             |
| tetPB-01     | 10B |       |       |      | CtIsLarge, CurveFitFailed   |
| tetPB-02     | 10B | 31.06 | 84.79 | 2.08 | CtIsLarge                   |
| tetPB-03     | 10B |       |       |      | LowEfficiency, CtIsSmall, C |
| tetPB-05     | 10B |       |       |      | CurveFitFailed              |
| tetQ         | 10B | 25.35 | 76.75 | 2.1  |                             |
| tetR-02      | 10B | 29.32 | 88.75 | 1.98 | MultipleMeltPeaks           |
| tetR-03      | 10B |       |       |      | LowEfficiency, CtIsSmall, C |
| tetS         | 10B | 33.48 | 85.22 | 2.04 | CtIsLarge                   |

|             |     |       |       |                                 |
|-------------|-----|-------|-------|---------------------------------|
| tetT        | 10B |       |       | NoAmplification                 |
| tetU-01     | 10B |       |       | LowEfficiency, CtIsSmall, Ci    |
| tetV        | 10B |       |       | LowEfficiency, CtIsSmall, Ci    |
| tetW-01     | 10B | 26.72 | 81.65 | 2.03                            |
| tetX        | 10B |       |       | BadR2, LowEfficiency, CtIsS     |
| tnpA-01     | 10B | 32.61 | 84.37 | 1.91 CtIsLarge                  |
| tnpA-02     | 10B | 32.83 | 87.98 | 1.79 LowEfficiency, CtIsLarge   |
| tnpA-03     | 10B | 33.36 | 74.83 | 2.05 CtIsLarge                  |
| tnpA-04     | 10B |       |       | NoAmplification                 |
| tnpA-05     | 10B |       |       | BadR2, LowEfficiency, CtIsS     |
| tnpA-07     | 10B |       |       | NoAmplification                 |
| tolC-01     | 10B | 33.34 | 76.41 | 1.91 CtIsLarge, MultipleMeltPea |
| tolC-02     | 10B | 29.28 | 87.6  | 2.02                            |
| tolC-03     | 10B | 28.83 | 86.16 | 2                               |
| Tp614       | 10B | 31.96 | 86.82 | 1.98 CtIsLarge, MultipleMeltPea |
| ttgA        | 10B |       |       | LowEfficiency, CtIsSmall, Ci    |
| ttgB        | 10B | 32.44 | 84.55 | 1.97 CtIsLarge, MultipleMeltPea |
| vanA        | 10B |       |       | NoAmplification                 |
| vanB-01     | 10B | 30.86 | 83.5  | 1.93 CtIsLarge, MultipleMeltPea |
| vanC-01     | 10B |       |       | LowEfficiency, CtIsSmall, Ci    |
| vanC-02     | 10B |       |       | LowEfficiency, CtIsSmall, Ci    |
| vanC-03     | 10B | 26.12 | 85.77 | 1.97 MultipleMeltPeaks          |
| vanC1       | 10B |       |       | LowEfficiency, CtIsSmall, Ci    |
| vanC2/vanC3 | 10B | 30.63 | 84.11 | 1.75 LowEfficiency, CtIsLarge   |
| vanG        | 10B |       |       | BadR2, LowEfficiency, CtIsS     |
| vanHB       | 10B |       |       | CtIsLarge, CurveFitFailed       |
| vanHD       | 10B |       |       | CtIsLarge, CurveFitFailed       |
| vanRA-01    | 10B |       |       | LowEfficiency, CtIsSmall, Ci    |
| vanRA-02    | 10B |       |       | NoAmplification                 |
| vanRB       | 10B | 34.72 | 82.7  | 1.87 CtIsLarge                  |
| vanRC       | 10B |       |       | LowEfficiency, CtIsSmall, Ci    |
| vanRC4      | 10B |       |       | LowEfficiency, CtIsSmall, Ci    |
| vanRD       | 10B |       |       | BadR2, LowEfficiency, CtIsS     |
| vanSA       | 10B |       |       | LowEfficiency, CtIsSmall, S:    |
| vanSB       | 10B | 28.29 | 74.38 | 2                               |
| vanSC-01    | 10B |       |       | CtIsLarge, CurveFitFailed       |
| vanSC-02    | 10B |       |       | NoAmplification                 |
| vanTC-01    | 10B |       |       | LowEfficiency, CtIsSmall, Ci    |
| vanTC-02    | 10B | 34.25 | 81.46 | 1.95 CtIsLarge                  |
| vanTE       | 10B |       |       | CtIsLarge, CurveFitFailed       |
| vanTG       | 10B |       |       | NoAmplification                 |
| vanWB       | 10B |       |       | LowEfficiency, CtIsSmall, Ci    |
| vanWG       | 10B |       |       | LowEfficiency, CtIsSmall, S:    |
| vanXA       | 10B |       |       | LowEfficiency, CtIsSmall, S:    |
| vanXB       | 10B |       |       | NoAmplification                 |
| vanXD       | 10B | 29.51 | 74.67 | 2.07 CtIsLarge                  |

|              |     |       |       |      |                              |
|--------------|-----|-------|-------|------|------------------------------|
| vanYB        | 10B |       |       |      | CtIsLarge, CurveFitFailed    |
| vanYD-01     | 10B | 31.54 | 80.87 | 1.81 | CtIsLarge, MultipleMeltPea   |
| vanYD-02     | 10B |       |       |      | CtIsLarge, CurveFitFailed    |
| vatB-01      | 10B |       |       |      | LowEfficiency, CtIsSmall, Ci |
| vatB-02      | 10B |       |       |      | LowEfficiency, CtIsSmall, Ci |
| vatC-01      | 10B |       |       |      | LowEfficiency, CtIsLarge, Ci |
| vatC-02      | 10B | 32.64 | 87.15 | 1.97 | CtIsLarge                    |
| vatE-01      | 10B | 30.32 | 77.25 | 1.96 | CtIsLarge                    |
| vatE-02      | 10B |       |       |      | NoAmplification              |
| vgaA-01      | 10B |       |       |      | LowEfficiency, CtIsSmall, Ci |
| vgaA-02      | 10B |       |       |      | LowEfficiency, CtIsSmall, Sa |
| vgb-01       | 10B | 33.33 | 79.11 | 1.94 | CtIsLarge                    |
| vgbB-01      | 10B |       |       |      | LowEfficiency, CtIsLarge, Ci |
| vgbB-02      | 10B |       |       |      | LowEfficiency, CtIsSmall, Ci |
| yceE/mdtG-0  | 10B | 34.73 | 77.32 | 2.11 | CtIsLarge                    |
| yceE/mdtG-0  | 10B |       |       |      | NoAmplification              |
| yceL/mdtH-0  | 10B | 31.97 | 85.43 | 1.94 | CtIsLarge                    |
| yceL/mdtH-0  | 10B |       |       |      | LowEfficiency, CtIsSmall, Ci |
| yceL/mdtH-0  | 10B |       |       |      | CtIsLarge, CurveFitFailed    |
| yidY/mdtL-01 | 10B | 30.76 | 89.15 | 2.03 | CtIsLarge, MultipleMeltPea   |
| yidY/mdtL-02 | 10B |       |       |      | LowEfficiency, CtIsSmall, Ci |































| Assay          | Sample | Ct | Tm    | Efficiency | flag                   |
|----------------|--------|----|-------|------------|------------------------|
| 16S rRNA       | 10C    |    | 15.51 | 82.3       | 2                      |
| aac            | 10C    |    |       |            | NoAmplification        |
| aac(6')-Ib(akz | 10C    |    |       |            | NoAmplification        |
| aac(6')-Ib(akz | 10C    |    |       |            | NoAmplification        |
| aac(6')-Ib(akz | 10C    |    |       |            | NoAmplification        |
| aac(6')-II     | 10C    |    |       |            | CurveFitFailed         |
| aac(6')I1      | 10C    |    |       |            | NoAmplification        |
| aacA/aphD      | 10C    |    |       |            | NoAmplification        |
| aacC           | 10C    |    |       |            | CurveFitFailed         |
| aacC1          | 10C    |    |       |            | NoAmplification        |
| aacC2          | 10C    |    |       |            | NoAmplification        |
| aacC4          | 10C    |    |       |            | NoAmplification        |
| aadA-01        | 10C    |    |       |            | NoAmplification        |
| aadA-02        | 10C    |    |       |            | NoAmplification        |
| aadA-1-01      | 10C    |    |       |            | NoAmplification        |
| aadA-1-02      | 10C    |    |       |            | NoAmplification        |
| aadA1          | 10C    |    |       |            | NoAmplification        |
| aadA2-01       | 10C    |    |       |            | NoAmplification        |
| aadA2-02       | 10C    |    |       |            | NoAmplification        |
| aadA2-03       | 10C    |    |       |            | CurveFitFailed         |
| aadA5-01       | 10C    |    |       |            | NoAmplification        |
| aadA5-02       | 10C    |    |       |            | NoAmplification        |
| aadA9-01       | 10C    |    |       |            | CurveFitFailed         |
| aadA9-02       | 10C    |    |       |            | NoAmplification        |
| aadD           | 10C    |    |       |            | NoAmplification        |
| aadE           | 10C    |    |       |            | NoAmplification        |
| acrA-01        | 10C    |    |       |            | CurveFitFailed         |
| acrA-02        | 10C    |    |       |            | CurveFitFailed         |
| acrA-03        | 10C    |    |       |            | NoAmplification        |
| acrA-04        | 10C    |    | 36.1  | 89.13      | 1.78                   |
| acrA-05        | 10C    |    | 35.18 | 88.73      | 1.84                   |
| acrB-01        | 10C    |    | 28.02 | 82.45      | 1.92                   |
| acrF           | 10C    |    | 29.98 | 82.69      | 1.84                   |
| acrR-01        | 10C    |    |       |            | NoAmplification        |
| acrR-02        | 10C    |    | 27.46 | 80.66      | 1.93                   |
| Actin          | 10C    |    | 25.55 | 87.2       | 1.91 MultipleMeltPeaks |
| adeA           | 10C    |    |       |            | CurveFitFailed         |
| ampC-01        | 10C    |    | 37.55 | 79.58      | 1.97 MultipleMeltPeaks |
| ampC-02        | 10C    |    | 28.48 | 82.11      | 1.91                   |
| ampC-04        | 10C    |    |       |            | NoAmplification        |
| ampC-05        | 10C    |    |       |            | NoAmplification        |
| ampC-06        | 10C    |    |       |            | NoAmplification        |
| ampC-07        | 10C    |    |       |            | NoAmplification        |
| ampC-09        | 10C    |    |       |            | NoAmplification        |
| ampC/blaDH     | 10C    |    |       |            | NoAmplification        |

|                          |     |       |       |                 |
|--------------------------|-----|-------|-------|-----------------|
| aph                      | 10C |       |       | NoAmplification |
| aph(2')-Id-01            | 10C |       |       | NoAmplification |
| aph(2')-Id-02            | 10C |       |       | NoAmplification |
| aph6ia                   | 10C | 36.13 | 76.53 | 1.73            |
| aphA1(aka k <sub>z</sub> | 10C | 27.91 | 76.36 | 1.98            |
| bacA-01                  | 10C |       |       | NoAmplification |
| bacA-02                  | 10C |       |       | CurveFitFailed  |
| BETA-globin              | 10C | 27.22 | 84.28 | 1.97            |
| bla-ACC-1                | 10C |       |       | NoAmplification |
| bla-L1                   | 10C |       |       | NoAmplification |
| bla1                     | 10C |       |       | NoAmplification |
| blaCMY                   | 10C |       |       | NoAmplification |
| blaCMY2-01               | 10C |       |       | NoAmplification |
| blaCMY2-02               | 10C | 35.86 | 80.06 | 1.81            |
| blaCTX-M-01              | 10C | 32.89 | 87.6  | 1.9             |
| blaCTX-M-02              | 10C |       |       | NoAmplification |
| blaCTX-M-03              | 10C |       |       | NoAmplification |
| blaCTX-M-04              | 10C |       |       | CurveFitFailed  |
| blaCTX-M-05              | 10C | 31.91 | 76.25 | 1.73            |
| blaCTX-M-06              | 10C |       |       | NoAmplification |
| blaGES                   | 10C |       |       | NoAmplification |
| blaIMP-01                | 10C |       |       | NoAmplification |
| blaIMP-02                | 10C |       |       | NoAmplification |
| blaMOX/blaC              | 10C |       |       | NoAmplification |
| blaOCH                   | 10C |       |       | NoAmplification |
| blaOKP                   | 10C |       |       | NoAmplification |
| blaOXA1/blaC             | 10C |       |       | NoAmplification |
| blaOXA10-01              | 10C |       |       | NoAmplification |
| blaOXA10-02              | 10C |       |       | NoAmplification |
| blaOXY                   | 10C |       |       | NoAmplification |
| blaPAO                   | 10C |       |       | NoAmplification |
| blaPER                   | 10C |       |       | NoAmplification |
| blaPSE                   | 10C |       |       | NoAmplification |
| blaROB                   | 10C |       |       | NoAmplification |
| blaSFO                   | 10C | 33.67 | 86.97 | 1.89            |
| blaSHV-01                | 10C |       |       | NoAmplification |
| blaSHV-02                | 10C |       |       | NoAmplification |
| blaTEM                   | 10C | 25.68 | 79.83 | 1.99            |
| blaTLA                   | 10C |       |       | NoAmplification |
| blaVEB                   | 10C |       |       | NoAmplification |
| blaVIM                   | 10C |       |       | NoAmplification |
| blaZ                     | 10C |       |       | NoAmplification |
| carB                     | 10C |       |       | NoAmplification |
| catA1                    | 10C |       |       | NoAmplification |
| catB3                    | 10C |       |       | NoAmplification |
| catB8                    | 10C |       |       | NoAmplification |

|            |     |       |       |      |                             |
|------------|-----|-------|-------|------|-----------------------------|
| ceoA       | 10C |       |       |      | NoAmplification             |
| cepA       | 10C |       |       |      | NoAmplification             |
| cfiA       | 10C |       |       |      | NoAmplification             |
| cfr        | 10C |       |       |      | NoAmplification             |
| cfxA       | 10C | 26.18 | 77.35 | 2.03 |                             |
| cmeA       | 10C |       |       |      | NoAmplification             |
| cmlA1-01   | 10C |       |       |      | NoAmplification             |
| cmlA1-02   | 10C |       |       |      | NoAmplification             |
| cmr        | 10C |       |       |      | NoAmplification             |
| cmx(A)     | 10C | 36.34 | 78.58 | 1.85 |                             |
| cphA-01    | 10C |       |       |      | NoAmplification             |
| cphA-02    | 10C | 30.05 | 78.31 | 1.97 |                             |
| dfrA1      | 10C |       |       |      | NoAmplification             |
| dfrA12     | 10C |       |       |      | NoAmplification             |
| emrD       | 10C |       |       |      | NoAmplification             |
| ereA       | 10C |       |       |      | NoAmplification             |
| ereB       | 10C |       |       |      | NoAmplification             |
| erm(34)    | 10C |       |       |      | NoAmplification             |
| erm(35)    | 10C |       |       |      | NoAmplification             |
| erm(36)    | 10C | 36.95 | 80.72 | 1.84 | MultipleMeltPeaks           |
| ermA       | 10C |       |       |      | NoAmplification             |
| ermA/ermTR | 10C |       |       |      | NoAmplification             |
| ermB       | 10C | 22.81 | 75.06 | 2.08 |                             |
| ermC       | 10C |       |       |      | NoAmplification             |
| ermF       | 10C |       |       |      | NoAmplification             |
| ermJ/ermD  | 10C |       |       |      | NoAmplification             |
| ermK-01    | 10C | 33.17 | 74.72 | 1.98 |                             |
| ermK-02    | 10C |       |       |      | NoAmplification             |
| ermT-01    | 10C |       |       |      | NoAmplification             |
| ermT-02    | 10C |       |       |      | NoAmplification             |
| ermX       | 10C |       |       |      | NoAmplification             |
| ermY       | 10C |       |       |      | NoAmplification             |
| fabK       | 10C | 23.62 | 78.26 | 2.09 |                             |
| floR       | 10C |       |       |      | NoAmplification             |
| folA       | 10C |       |       |      | NoAmplification             |
| fosB       | 10C |       |       |      | LowEfficiency, CtlSmall, S: |
| fosX       | 10C |       |       |      | NoAmplification             |
| fox5       | 10C | 35.21 | 78.21 | 1.85 | MultipleMeltPeaks           |
| imiR       | 10C |       |       |      | NoAmplification             |
| ImrA-01    | 10C |       |       |      | NoAmplification             |
| intl       | 10C |       |       |      | NoAmplification             |
| intl1      | 10C | 23.71 | 86.47 | 1.98 | MultipleMeltPeaks           |
| IS613      | 10C |       |       |      | NoAmplification             |
| lnuA-01    | 10C |       |       |      | NoAmplification             |
| lnuB-01    | 10C |       |       |      | NoAmplification             |
| lnuB-02    | 10C |       |       |      | NoAmplification             |

|                |     |       |       |      |                   |
|----------------|-----|-------|-------|------|-------------------|
| lnuC           | 10C |       |       |      | NoAmplification   |
| marR-01        | 10C |       |       |      | CurveFitFailed    |
| matA/mel       | 10C | 18.3  | 77.98 | 1.99 |                   |
| mdet1          | 10C |       |       |      | NoAmplification   |
| mdtA           | 10C |       |       |      | NoAmplification   |
| mdtE/yhiU      | 10C | 30.74 | 80.7  | 1.95 |                   |
| mecA           | 10C |       |       |      | NoAmplification   |
| mefA           | 10C | 18.62 | 80.69 | 1.92 | MultipleMeltPeaks |
| mepA           | 10C | 34    | 87.64 | 1.86 |                   |
| mexA           | 10C |       |       |      | NoAmplification   |
| mexD           | 10C |       |       |      | NoAmplification   |
| mexE           | 10C | 30.8  | 82.5  | 1.94 |                   |
| mexF           | 10C | 31.45 | 85.25 | 1.76 |                   |
| mphA-01        | 10C | 37.38 | 85.64 | 1.75 |                   |
| mphA-02        | 10C | 32.81 | 77.14 | 2    |                   |
| mphB           | 10C |       |       |      | NoAmplification   |
| mphC           | 10C |       |       |      | NoAmplification   |
| msrA-01        | 10C |       |       |      | NoAmplification   |
| msrC-01        | 10C |       |       |      | NoAmplification   |
| mtrC-01        | 10C |       |       |      | NoAmplification   |
| mtrC-02        | 10C | 35.33 | 82.61 | 1.88 |                   |
| mtrD-02        | 10C | 31.33 | 81.55 | 1.97 |                   |
| mtrD-03        | 10C | 34.2  | 82.28 | 1.85 |                   |
| NDM1           | 10C |       |       |      | NoAmplification   |
| nimE           | 10C |       |       |      | NoAmplification   |
| nisB           | 10C |       |       |      | NoAmplification   |
| oleC           | 10C | 33.28 | 89.85 | 1.86 |                   |
| oprD           | 10C | 36.38 | 86.21 | 1.81 |                   |
| oprJ           | 10C | 34.98 | 92.18 | 1.83 |                   |
| pbp            | 10C |       |       |      | NoAmplification   |
| pbp2x          | 10C | 23.8  | 75.53 | 2.07 |                   |
| Pbp5           | 10C |       |       |      | NoAmplification   |
| penA           | 10C |       |       |      | NoAmplification   |
| pikR1          | 10C |       |       |      | NoAmplification   |
| pikR2          | 10C |       |       |      | NoAmplification   |
| pmrA           | 10C | 39.76 | 78.62 | 1.86 |                   |
| pncA           | 10C | 40.55 | 88.63 | 1.65 |                   |
| putative multi | 10C |       |       |      | NoAmplification   |
| qac            | 10C |       |       |      | NoAmplification   |
| qacA           | 10C |       |       |      | NoAmplification   |
| qacA/qacB      | 10C |       |       |      | NoAmplification   |
| qacEdelta1-0   | 10C |       |       |      | NoAmplification   |
| qacEdelta1-0   | 10C | 31.03 | 76.08 | 1.94 |                   |
| qacH-01        | 10C | 38.17 | 78.02 | 1.86 | MultipleMeltPeaks |
| qacH-02        | 10C |       |       |      | NoAmplification   |
| qnrA           | 10C |       |       |      | NoAmplification   |



|              |     |       |       |      |                            |
|--------------|-----|-------|-------|------|----------------------------|
| rarD-02      | 10C |       |       |      | NoAmplification            |
| sat4         | 10C |       |       |      | NoAmplification            |
| sdeB         | 10C |       |       |      | NoAmplification            |
| spcN-01      | 10C |       |       |      | NoAmplification            |
| speA         | 10C |       |       |      | NoAmplification            |
| str          | 10C |       |       |      | NoAmplification            |
| strA         | 10C |       |       |      | NoAmplification            |
| strB         | 10C |       |       |      | NoAmplification            |
| sul1         | 10C |       |       |      | NoAmplification            |
| sul2         | 10C |       |       |      | NoAmplification            |
| sulA/foIP-01 | 10C | 24.75 | 81.33 | 1.95 |                            |
| sulA/foIP-03 | 10C | 22.17 | 83.67 | 1.95 |                            |
| tet(32)      | 10C |       |       |      | NoAmplification            |
| tet(34)      | 10C | 30.1  | 75.53 | 2.01 |                            |
| tet(35)      | 10C |       |       |      | NoAmplification            |
| tet(36)-A    | 10C |       |       |      | NoAmplification            |
| tet(36)-B    | 10C |       |       |      | NoAmplification            |
| tet(37)      | 10C | 25.46 | 76.67 | 1.94 |                            |
| tetA-01      | 10C |       |       |      | BadR2, CtlSmall, Saturatio |
| tetA-02      | 10C |       |       |      | NoAmplification            |
| tetB-01      | 10C |       |       |      | NoAmplification            |
| tetB-02      | 10C |       |       |      | NoAmplification            |
| tetC-01      | 10C |       |       |      | NoAmplification            |
| tetC-02      | 10C |       |       |      | NoAmplification            |
| tetD-01      | 10C |       |       |      | NoAmplification            |
| tetD-02      | 10C | 40    | 76.07 | 1.74 |                            |
| tetE         | 10C |       |       |      | NoAmplification            |
| tetG-01      | 10C | 36.54 | 81.29 | 1.84 | MultipleMeltPeaks          |
| tetG-02      | 10C | 38.9  | 63.68 | 1.65 | MultipleMeltPeaks          |
| tetH         | 10C |       |       |      | NoAmplification            |
| tetJ         | 10C |       |       |      | NoAmplification            |
| tetK         | 10C |       |       |      | NoAmplification            |
| tetL-01      | 10C |       |       |      | NoAmplification            |
| tetL-02      | 10C |       |       |      | NoAmplification            |
| tetM-01      | 10C | 22.98 | 76.23 | 1.96 |                            |
| tetM-02      | 10C | 24.95 | 77.63 | 1.95 |                            |
| tetO-01      | 10C |       |       |      | NoAmplification            |
| tetPA        | 10C |       |       |      | NoAmplification            |
| tetPB-01     | 10C |       |       |      | NoAmplification            |
| tetPB-02     | 10C |       |       |      | NoAmplification            |
| tetPB-03     | 10C |       |       |      | NoAmplification            |
| tetPB-05     | 10C |       |       |      | NoAmplification            |
| tetQ         | 10C | 23.76 | 77.51 | 1.98 |                            |
| tetR-02      | 10C | 38.02 | 80.03 | 1.75 |                            |
| tetR-03      | 10C |       |       |      | NoAmplification            |
| tetS         | 10C |       |       |      | NoAmplification            |

|             |     |       |       |                 |
|-------------|-----|-------|-------|-----------------|
| tetT        | 10C |       |       | NoAmplification |
| tetU-01     | 10C |       |       | NoAmplification |
| tetV        | 10C |       |       | NoAmplification |
| tetW-01     | 10C | 24.92 | 81.54 | 1.95            |
| tetX        | 10C |       |       | NoAmplification |
| tnpA-01     | 10C |       |       | NoAmplification |
| tnpA-02     | 10C |       |       | NoAmplification |
| tnpA-03     | 10C | 31.67 | 77.43 | 2.01            |
| tnpA-04     | 10C | 28.99 | 82.35 | 1.91            |
| tnpA-05     | 10C |       |       | NoAmplification |
| tnpA-07     | 10C |       |       | NoAmplification |
| tolC-01     | 10C | 28.15 | 78.92 | 1.89            |
| tolC-02     | 10C | 32.09 | 79.01 | 1.83            |
| tolC-03     | 10C | 32.48 | 79.81 | 1.84            |
| Tp614       | 10C |       |       | NoAmplification |
| ttgA        | 10C |       |       | NoAmplification |
| ttgB        | 10C |       |       | NoAmplification |
| vanA        | 10C |       |       | NoAmplification |
| vanB-01     | 10C |       |       | CurveFitFailed  |
| vanC-01     | 10C |       |       | NoAmplification |
| vanC-02     | 10C |       |       | NoAmplification |
| vanC-03     | 10C | 31.62 | 84.65 | 1.86            |
| vanC1       | 10C |       |       | NoAmplification |
| vanC2/vanC3 | 10C | 37.07 | 87.24 | 1.78            |
| vanG        | 10C |       |       | NoAmplification |
| vanHB       | 10C |       |       | NoAmplification |
| vanHD       | 10C |       |       | NoAmplification |
| vanRA-01    | 10C |       |       | NoAmplification |
| vanRA-02    | 10C |       |       | NoAmplification |
| vanRB       | 10C | 34.77 | 87.04 | 1.85            |
| vanRC       | 10C |       |       | NoAmplification |
| vanRC4      | 10C |       |       | NoAmplification |
| vanRD       | 10C |       |       | NoAmplification |
| vanSA       | 10C |       |       | NoAmplification |
| vanSB       | 10C | 27.6  | 74.75 | 2.04            |
| vanSC-01    | 10C |       |       | NoAmplification |
| vanSC-02    | 10C |       |       | NoAmplification |
| vanTC-01    | 10C |       |       | NoAmplification |
| vanTC-02    | 10C |       |       | CurveFitFailed  |
| vanTE       | 10C |       |       | CurveFitFailed  |
| vanTG       | 10C |       |       | NoAmplification |
| vanWB       | 10C |       |       | NoAmplification |
| vanWG       | 10C |       |       | NoAmplification |
| vanXA       | 10C |       |       | CurveFitFailed  |
| vanXB       | 10C |       |       | NoAmplification |
| vanXD       | 10C | 30.52 | 75.16 | 2.02            |

|              |     |       |       |      |                 |
|--------------|-----|-------|-------|------|-----------------|
| vanYB        | 10C |       |       |      | NoAmplification |
| vanYD-01     | 10C |       |       |      | CurveFitFailed  |
| vanYD-02     | 10C |       |       |      | NoAmplification |
| vatB-01      | 10C |       |       |      | NoAmplification |
| vatB-02      | 10C |       |       |      | NoAmplification |
| vatC-01      | 10C |       |       |      | NoAmplification |
| vatC-02      | 10C |       |       |      | NoAmplification |
| vatE-01      | 10C | 27.69 | 76.85 | 2.09 |                 |
| vatE-02      | 10C |       |       |      | NoAmplification |
| vgaA-01      | 10C |       |       |      | NoAmplification |
| vgaA-02      | 10C |       |       |      | NoAmplification |
| vgb-01       | 10C |       |       |      | NoAmplification |
| vgbB-01      | 10C |       |       |      | NoAmplification |
| vgbB-02      | 10C |       |       |      | NoAmplification |
| yceE/mdtG-0  | 10C |       |       |      | NoAmplification |
| yceE/mdtG-0  | 10C |       |       |      | NoAmplification |
| yceL/mdtH-0  | 10C |       |       |      | NoAmplification |
| yceL/mdtH-0  | 10C |       |       |      | NoAmplification |
| yceL/mdtH-0  | 10C | 30.13 | 78.9  | 1.93 |                 |
| yidY/mdtL-01 | 10C |       |       |      | NoAmplification |
| yidY/mdtL-02 | 10C | 29.41 | 79.89 | 1.93 |                 |































| Assay          | Sample | Ct | Tm    | Efficiency | flag                         |
|----------------|--------|----|-------|------------|------------------------------|
| 16S rRNA       | 11A    |    | 16.74 | 82.26      | 2.02                         |
| aac            | 11A    |    | 30.39 | 78.88      | 1.71 MultipleMeltPeaks       |
| aac(6')-Ib(akz | 11A    |    |       |            | LowEfficiency, CtIsSmall, S: |
| aac(6')-Ib(akz | 11A    |    | 34.71 | 81.45      | 1.95                         |
| aac(6')-Ib(akz | 11A    |    |       |            | CurveFitFailed               |
| aac(6')-II     | 11A    |    | 37.69 | 80.83      | 1.55                         |
| aac(6')I1      | 11A    |    |       |            | NoAmplification              |
| aacA/aphD      | 11A    |    |       |            | CurveFitFailed               |
| aacC           | 11A    |    | 31.18 | 91.86      | 1.99 MultipleMeltPeaks       |
| aacC1          | 11A    |    |       |            | NoAmplification              |
| aacC2          | 11A    |    |       |            | NoAmplification              |
| aacC4          | 11A    |    |       |            | NoAmplification              |
| aadA-01        | 11A    |    |       |            | LowEfficiency, CtIsSmall, C: |
| aadA-02        | 11A    |    |       |            | CurveFitFailed               |
| aadA-1-01      | 11A    |    | 34.92 | 81.31      | 1.89                         |
| aadA-1-02      | 11A    |    |       |            | CurveFitFailed               |
| aadA1          | 11A    |    | 31.66 | 83.29      | 2.03                         |
| aadA2-01       | 11A    |    |       |            | CurveFitFailed               |
| aadA2-02       | 11A    |    | 35.43 | 74.47      | 1.84 MultipleMeltPeaks       |
| aadA2-03       | 11A    |    |       |            | NoAmplification              |
| aadA5-01       | 11A    |    | 37.52 | 78.04      | 1.81                         |
| aadA5-02       | 11A    |    | 32.64 | 85.36      | 1.98 MultipleMeltPeaks       |
| aadA9-01       | 11A    |    |       |            | CurveFitFailed               |
| aadA9-02       | 11A    |    | 37.41 | 78.6       | 1.95 MultipleMeltPeaks       |
| aadD           | 11A    |    |       |            | LowEfficiency, CtIsSmall, S: |
| aadE           | 11A    |    |       |            | CurveFitFailed               |
| acrA-01        | 11A    |    | 33.26 | 88.59      | 1.94 MultipleMeltPeaks       |
| acrA-02        | 11A    |    | 37.68 | 88.29      | 1.75 MultipleMeltPeaks       |
| acrA-03        | 11A    |    | 37.58 | 90.38      | 1.68 MultipleMeltPeaks       |
| acrA-04        | 11A    |    | 31.45 | 80.48      | 2.03                         |
| acrA-05        | 11A    |    | 32.7  | 80.31      | 1.98 MultipleMeltPeaks       |
| acrB-01        | 11A    |    |       |            | NoAmplification              |
| acrF           | 11A    |    | 29.24 | 83.09      | 1.76                         |
| acrR-01        | 11A    |    | 32.84 | 81.15      | 1.94                         |
| acrR-02        | 11A    |    |       |            | CurveFitFailed               |
| Actin          | 11A    |    | 20.96 | 86.81      | 2.04 MultipleMeltPeaks       |
| adeA           | 11A    |    | 33.55 | 77.14      | 1.93                         |
| ampC-01        | 11A    |    | 35.66 | 85.17      | 1.9                          |
| ampC-02        | 11A    |    |       |            | LowEfficiency, CtIsSmall, C: |
| ampC-04        | 11A    |    | 33.88 | 80.57      | 1.95                         |
| ampC-05        | 11A    |    |       |            | LowEfficiency, CtIsSmall, S: |
| ampC-06        | 11A    |    |       |            | LowEfficiency, CtIsSmall, S: |
| ampC-07        | 11A    |    | 39.18 | 82.64      | 1.66 MultipleMeltPeaks       |
| ampC-09        | 11A    |    |       |            | LowEfficiency, CtIsSmall, C: |
| ampC/blaDH     | 11A    |    | 33.14 | 86.34      | 1.98 MultipleMeltPeaks       |

|               |     |       |       |      |                              |
|---------------|-----|-------|-------|------|------------------------------|
| aph           | 11A |       |       |      | LowEfficiency, CtIsSmall, S; |
| aph(2')-Id-01 | 11A |       |       |      | LowEfficiency, CtIsSmall, C  |
| aph(2')-Id-02 | 11A |       |       |      | LowEfficiency, CtIsSmall, C  |
| aph6ia        | 11A | 28.62 | 78.33 | 1.95 |                              |
| aphA1(aka k   | 11A |       |       |      | LowEfficiency, CtIsSmall, S; |
| bacA-01       | 11A |       |       |      | BadR2, LowEfficiency, CtIsS  |
| bacA-02       | 11A | 35.02 | 88.24 | 1.73 | MultipleMeltPeaks            |
| BETA-globin   | 11A | 22.88 | 84.07 | 2.04 |                              |
| bla-ACC-1     | 11A | 35.14 | 82.47 | 1.91 |                              |
| bla-L1        | 11A | 31.41 | 83.72 | 1.99 |                              |
| bla1          | 11A |       |       |      | LowEfficiency, CtIsSmall, C  |
| blaCMY        | 11A |       |       |      | CurveFitFailed               |
| blaCMY2-01    | 11A | 36.96 | 77.19 | 1.86 |                              |
| blaCMY2-02    | 11A | 29.3  | 84.96 | 1.99 |                              |
| blaCTX-M-01   | 11A |       |       |      | CurveFitFailed               |
| blaCTX-M-02   | 11A | 39.81 | 79.63 | 1.68 | MultipleMeltPeaks            |
| blaCTX-M-03   | 11A |       |       |      | CurveFitFailed               |
| blaCTX-M-04   | 11A | 44.95 | 75.73 | 1.81 | MultipleMeltPeaks            |
| blaCTX-M-05   | 11A | 31.06 | 76.27 | 1.76 |                              |
| blaCTX-M-06   | 11A |       |       |      | NoAmplification              |
| blaGES        | 11A |       |       |      | LowEfficiency, CtIsSmall, S; |
| blaIMP-01     | 11A |       |       |      | LowEfficiency, CtIsSmall, C  |
| blaIMP-02     | 11A |       |       |      | LowEfficiency, CtIsSmall, S; |
| blaMOX/blaC   | 11A |       |       |      | NoAmplification              |
| blaOCH        | 11A |       |       |      | NoAmplification              |
| blaOKP        | 11A |       |       |      | NoAmplification              |
| blaOXA1/blaC  | 11A |       |       |      | CurveFitFailed               |
| blaOXA10-01   | 11A |       |       |      | LowEfficiency, CtIsSmall, S; |
| blaOXA10-02   | 11A |       |       |      | LowEfficiency, CtIsSmall, S; |
| blaOXY        | 11A |       |       |      | LowEfficiency, CtIsSmall, S; |
| blaPAO        | 11A |       |       |      | NoAmplification              |
| blaPER        | 11A |       |       |      | LowEfficiency, CtIsSmall, S; |
| blaPSE        | 11A |       |       |      | NoAmplification              |
| blaROB        | 11A |       |       |      | NoAmplification              |
| blaSFO        | 11A | 34.98 | 82.26 | 1.94 | MultipleMeltPeaks            |
| blaSHV-01     | 11A |       |       |      | LowEfficiency, CtIsSmall, S; |
| blaSHV-02     | 11A | 35.26 | 83.88 | 2.06 |                              |
| blaTEM        | 11A | 32.86 | 80.11 | 1.78 |                              |
| blaTLA        | 11A |       |       |      | LowEfficiency, CtIsSmall, C  |
| blaVEB        | 11A |       |       |      | LowEfficiency, CtIsSmall, C  |
| blaVIM        | 11A |       |       |      | NoAmplification              |
| blaZ          | 11A |       |       |      | LowEfficiency, CtIsSmall, S; |
| carB          | 11A |       |       |      | NoAmplification              |
| catA1         | 11A |       |       |      | NoAmplification              |
| catB3         | 11A |       |       |      | LowEfficiency, CtIsSmall, C  |
| catB8         | 11A | 30.09 | 82.03 | 2.02 |                              |

|            |     |       |       |      |                                          |
|------------|-----|-------|-------|------|------------------------------------------|
| ceoA       | 11A | 32.85 | 82.31 | 1.99 | MultipleMeltPeaks                        |
| cepA       | 11A |       |       |      | NoAmplification                          |
| cfiA       | 11A | 30.85 | 84.37 | 1.83 |                                          |
| cfr        | 11A |       |       |      | LowEfficiency, CtIsSmall, S <sub>e</sub> |
| cfxA       | 11A | 25.83 | 77.42 | 2.07 |                                          |
| cmeA       | 11A |       |       |      | LowEfficiency, CtIsSmall, S <sub>e</sub> |
| cmlA1-01   | 11A |       |       |      | LowEfficiency, CtIsSmall, S <sub>e</sub> |
| cmlA1-02   | 11A | 33.2  | 82.32 | 1.96 |                                          |
| cmr        | 11A | 35.03 | 78.62 | 1.9  |                                          |
| cmx(A)     | 11A | 26.47 | 84.92 | 2.01 |                                          |
| cphA-01    | 11A | 31.67 | 85.62 | 2.03 |                                          |
| cphA-02    | 11A |       |       |      | CurveFitFailed                           |
| dfrA1      | 11A | 32.66 | 78.29 | 2    |                                          |
| dfrA12     | 11A |       |       |      | CurveFitFailed                           |
| emrD       | 11A |       |       |      | CurveFitFailed                           |
| ereA       | 11A |       |       |      | CurveFitFailed                           |
| ereB       | 11A | 32.9  | 85.55 | 2.11 |                                          |
| erm(34)    | 11A |       |       |      | NoAmplification                          |
| erm(35)    | 11A |       |       |      | LowEfficiency, CtIsSmall, C <sub>i</sub> |
| erm(36)    | 11A |       |       |      | CurveFitFailed                           |
| ermA       | 11A |       |       |      | LowEfficiency, CtIsSmall, S <sub>e</sub> |
| ermA/ermTR | 11A |       |       |      | NoAmplification                          |
| ermB       | 11A | 22.98 | 74.9  | 2.18 |                                          |
| ermC       | 11A |       |       |      | LowEfficiency, CtIsSmall, S <sub>e</sub> |
| ermF       | 11A | 30.29 | 72.15 | 2.05 |                                          |
| ermJ/ermD  | 11A |       |       |      | LowEfficiency, CtIsSmall, S <sub>e</sub> |
| ermK-01    | 11A | 37.99 | 73.52 | 1.89 |                                          |
| ermK-02    | 11A | 38.31 | 82.12 | 1.63 | MultipleMeltPeaks                        |
| ermT-01    | 11A |       |       |      | LowEfficiency, CtIsSmall, S <sub>e</sub> |
| ermT-02    | 11A |       |       |      | LowEfficiency, CtIsSmall, S <sub>e</sub> |
| ermX       | 11A | 26.92 | 83.58 | 1.91 |                                          |
| ermY       | 11A |       |       |      | LowEfficiency, CtIsSmall, S <sub>e</sub> |
| fabK       | 11A | 25    | 77.38 | 2.12 |                                          |
| floR       | 11A |       |       |      | NoAmplification                          |
| folA       | 11A |       |       |      | NoAmplification                          |
| fosB       | 11A |       |       |      | LowEfficiency, CtIsSmall, S <sub>e</sub> |
| fosX       | 11A |       |       |      | CurveFitFailed                           |
| fox5       | 11A | 28.35 | 87.25 | 1.98 |                                          |
| imiR       | 11A |       |       |      | BadR2, LowEfficiency, CtIsS              |
| ImrA-01    | 11A | 38.16 | 82.75 | 1.87 |                                          |
| intl       | 11A | 35.95 | 84.78 | 1.88 | MultipleMeltPeaks                        |
| intl1      | 11A | 20.22 | 87.06 | 2.03 |                                          |
| IS613      | 11A | 23.72 | 79.46 | 1.78 |                                          |
| lnuA-01    | 11A |       |       |      | LowEfficiency, CtIsSmall, S <sub>e</sub> |
| lnuB-01    | 11A |       |       |      | CurveFitFailed                           |
| lnuB-02    | 11A |       |       |      | CurveFitFailed                           |

|                |     |       |       |      |                             |
|----------------|-----|-------|-------|------|-----------------------------|
| lnuC           | 11A | 31.4  | 84.04 | 1.92 |                             |
| marR-01        | 11A | 35.87 | 80.43 | 1.87 | MultipleMeltPeaks           |
| matA/mel       | 11A | 21.57 | 77.68 | 2.12 |                             |
| mdet1          | 11A |       |       |      | LowEfficiency, CtIsSmall, C |
| mdtA           | 11A | 38.14 | 78.51 | 1.77 | MultipleMeltPeaks           |
| mdtE/yhiU      | 11A |       |       |      | CurveFitFailed              |
| mecA           | 11A |       |       |      | LowEfficiency, CtIsSmall, C |
| mefA           | 11A | 20.92 | 80.5  | 2.01 |                             |
| mepA           | 11A | 35.23 | 85.55 | 1.9  |                             |
| mexA           | 11A |       |       |      | LowEfficiency, CtIsSmall, S |
| mexD           | 11A | 32.15 | 80.13 | 2.06 |                             |
| mexE           | 11A | 39.08 | 79.2  | 1.69 | MultipleMeltPeaks           |
| mexF           | 11A | 28.72 | 84.63 | 2.06 |                             |
| mphA-01        | 11A | 32.08 | 86.83 | 1.99 |                             |
| mphA-02        | 11A | 30.87 | 86.4  | 2    |                             |
| mphB           | 11A | 32.72 | 82.78 | 2.09 |                             |
| mphC           | 11A |       |       |      | LowEfficiency, CtIsSmall, S |
| msrA-01        | 11A |       |       |      | CurveFitFailed              |
| msrC-01        | 11A |       |       |      | NoAmplification             |
| mtrC-01        | 11A |       |       |      | LowEfficiency, CtIsSmall, C |
| mtrC-02        | 11A | 37.84 | 84.25 | 1.76 |                             |
| mtrD-02        | 11A | 27.15 | 81.43 | 1.98 |                             |
| mtrD-03        | 11A | 32.77 | 82.04 | 1.91 |                             |
| NDM1           | 11A |       |       |      | CurveFitFailed              |
| nimE           | 11A |       |       |      | LowEfficiency, CtIsSmall, S |
| nisB           | 11A |       |       |      | CurveFitFailed              |
| oleC           | 11A | 37.62 | 84    | 1.8  | MultipleMeltPeaks           |
| oprD           | 11A | 31.99 | 81.31 | 2.05 |                             |
| oprJ           | 11A | 32.31 | 87.97 | 1.94 |                             |
| pbp            | 11A |       |       |      | LowEfficiency, CtIsSmall, S |
| pbp2x          | 11A | 23.83 | 76.39 | 2.04 |                             |
| Pbp5           | 11A |       |       |      | LowEfficiency, CtIsSmall, S |
| penA           | 11A | 43.64 | 87.1  | 1.72 | MultipleMeltPeaks           |
| pikR1          | 11A |       |       |      | LowEfficiency, CtIsSmall, C |
| pikR2          | 11A | 31.16 | 88.46 | 2.11 |                             |
| pmrA           | 11A | 27.16 | 78.91 | 2.09 |                             |
| pncA           | 11A | 28.85 | 84.48 | 1.91 |                             |
| putative multi | 11A | 35.17 | 76.72 | 1.9  | MultipleMeltPeaks           |
| qac            | 11A |       |       |      | CurveFitFailed              |
| qacA           | 11A | 34.87 | 79.26 | 1.94 |                             |
| qacA/qacB      | 11A |       |       |      | NoAmplification             |
| qacEdelta1-0   | 11A |       |       |      | LowEfficiency, CtIsSmall, S |
| qacEdelta1-0   | 11A | 32.26 | 76.25 | 1.98 |                             |
| qacH-01        | 11A | 33.83 | 84.68 | 1.95 |                             |
| qacH-02        | 11A | 33.53 | 79.3  | 1.95 |                             |
| qnrA           | 11A |       |       |      | CurveFitFailed              |

|              |     |       |       |      |                             |
|--------------|-----|-------|-------|------|-----------------------------|
| rarD-02      | 11A |       |       |      | BadR2, LowEfficiency, CtIsS |
| sat4         | 11A |       |       |      | LowEfficiency, CtIsSmall, S |
| sdeB         | 11A |       |       |      | LowEfficiency, CtIsSmall, S |
| spcN-01      | 11A | 35.62 | 85.14 | 1.88 |                             |
| speA         | 11A |       |       |      | NoAmplification             |
| str          | 11A |       |       |      | LowEfficiency, CtIsSmall, S |
| strA         | 11A |       |       |      | LowEfficiency, CtIsSmall, S |
| strB         | 11A | 28.25 | 83.82 | 1.94 |                             |
| sul1         | 11A |       |       |      | NoAmplification             |
| sul2         | 11A | 29.57 | 85.63 | 1.99 |                             |
| sulA/foIP-01 | 11A | 24.54 | 81.51 | 2.01 |                             |
| sulA/foIP-03 | 11A | 22.61 | 83.17 | 2.03 |                             |
| tet(32)      | 11A | 24.85 | 81.27 | 2    |                             |
| tet(34)      | 11A | 29.99 | 75.79 | 2    |                             |
| tet(35)      | 11A |       |       |      | NoAmplification             |
| tet(36)-A    | 11A |       |       |      | CurveFitFailed              |
| tet(36)-B    | 11A |       |       |      | LowEfficiency, CtIsSmall, S |
| tet(37)      | 11A | 26.38 | 75.97 | 1.98 | MultipleMeltPeaks           |
| tetA-01      | 11A | 29.78 | 85.11 | 1.92 |                             |
| tetA-02      | 11A |       |       |      | CurveFitFailed              |
| tetB-01      | 11A | 34.86 | 86.26 | 1.86 |                             |
| tetB-02      | 11A | 28.07 | 79.55 | 2.03 |                             |
| tetC-01      | 11A |       |       |      | NoAmplification             |
| tetC-02      | 11A | 38.12 | 76.27 | 1.9  |                             |
| tetD-01      | 11A |       |       |      | CurveFitFailed              |
| tetD-02      | 11A |       |       |      | CurveFitFailed              |
| tetE         | 11A |       |       |      | CurveFitFailed              |
| tetG-01      | 11A | 32.15 | 79.8  | 1.76 |                             |
| tetG-02      | 11A | 31.77 | 82.38 | 1.97 |                             |
| tetH         | 11A |       |       |      | LowEfficiency, CtIsSmall, C |
| tetJ         | 11A |       |       |      | LowEfficiency, CtIsSmall, C |
| tetK         | 11A |       |       |      | LowEfficiency, CtIsSmall, S |
| tetL-01      | 11A |       |       |      | LowEfficiency, CtIsSmall, S |
| tetL-02      | 11A | 33.97 | 85.2  | 1.78 |                             |
| tetM-01      | 11A | 22.15 | 75.98 | 2.08 |                             |
| tetM-02      | 11A | 22.56 | 77.6  | 2.09 |                             |
| tetO-01      | 11A | 22.96 | 76.87 | 2.11 |                             |
| tetPA        | 11A |       |       |      | NoAmplification             |
| tetPB-01     | 11A |       |       |      | NoAmplification             |
| tetPB-02     | 11A | 28.46 | 84.67 | 2.09 |                             |
| tetPB-03     | 11A |       |       |      | LowEfficiency, CtIsSmall, S |
| tetPB-05     | 11A |       |       |      | LowEfficiency, CtIsSmall, C |
| tetQ         | 11A | 24.68 | 75.93 | 2.05 |                             |
| tetR-02      | 11A | 33.88 | 87.66 | 1.84 | MultipleMeltPeaks           |
| tetR-03      | 11A |       |       |      | LowEfficiency, CtIsSmall, S |
| tetS         | 11A |       |       |      | LowEfficiency, CtIsSmall, S |

|             |     |       |       |      |                                          |
|-------------|-----|-------|-------|------|------------------------------------------|
| tetT        | 11A |       |       |      | NoAmplification                          |
| tetU-01     | 11A |       |       |      | CurveFitFailed                           |
| tetV        | 11A |       |       |      | LowEfficiency, CtIsSmall, S <sub>e</sub> |
| tetW-01     | 11A | 25.81 | 81.66 | 2.03 |                                          |
| tetX        | 11A |       |       |      | LowEfficiency, CtIsSmall, C <sub>i</sub> |
| tnpA-01     | 11A |       |       |      | BadR2, LowEfficiency, CtIsS              |
| tnpA-02     | 11A |       |       |      | LowEfficiency, CtIsSmall, S <sub>e</sub> |
| tnpA-03     | 11A | 36.35 | 77.56 | 1.94 |                                          |
| tnpA-04     | 11A |       |       |      | LowEfficiency, CtIsSmall, S <sub>e</sub> |
| tnpA-05     | 11A |       |       |      | LowEfficiency, CtIsSmall, S <sub>e</sub> |
| tnpA-07     | 11A |       |       |      | CurveFitFailed                           |
| tolC-01     | 11A | 37.21 | 81.3  | 1.73 |                                          |
| tolC-02     | 11A | 31.14 | 84.07 | 2.04 |                                          |
| tolC-03     | 11A | 30.68 | 85.54 | 1.99 |                                          |
| Tp614       | 11A | 34.66 | 82.9  | 1.87 |                                          |
| ttgA        | 11A | 38.67 | 87.27 | 1.78 |                                          |
| ttgB        | 11A | 33.11 | 84.43 | 1.98 |                                          |
| vanA        | 11A |       |       |      | LowEfficiency, CtIsSmall, C <sub>i</sub> |
| vanB-01     | 11A | 35.22 | 83.84 | 1.85 |                                          |
| vanC-01     | 11A | 35.48 | 73.13 | 2.03 |                                          |
| vanC-02     | 11A |       |       |      | CurveFitFailed                           |
| vanC-03     | 11A | 26.23 | 85.83 | 1.98 |                                          |
| vanC1       | 11A |       |       |      | NoAmplification                          |
| vanC2/vanC3 | 11A | 31.7  | 84.18 | 2.13 |                                          |
| vanG        | 11A |       |       |      | LowEfficiency, CtIsSmall, C <sub>i</sub> |
| vanHB       | 11A | 36.58 | 89.05 | 1.82 |                                          |
| vanHD       | 11A |       |       |      | CtIsLarge, CurveFitFailed                |
| vanRA-01    | 11A |       |       |      | LowEfficiency, CtIsSmall, C <sub>i</sub> |
| vanRA-02    | 11A |       |       |      | LowEfficiency, CtIsSmall, C <sub>i</sub> |
| vanRB       | 11A | 33.87 | 75.33 | 1.52 | MultipleMeltPeaks                        |
| vanRC       | 11A |       |       |      | LowEfficiency, CtIsSmall, C <sub>i</sub> |
| vanRC4      | 11A |       |       |      | LowEfficiency, CtIsSmall, C <sub>i</sub> |
| vanRD       | 11A |       |       |      | BadR2, CtIsSmall, Saturatio              |
| vanSA       | 11A |       |       |      | LowEfficiency, CtIsSmall, S <sub>e</sub> |
| vanSB       | 11A | 27.19 | 74.86 | 2.08 |                                          |
| vanSC-01    | 11A | 31.53 | 83.96 | 2.09 |                                          |
| vanSC-02    | 11A |       |       |      | NoAmplification                          |
| vanTC-01    | 11A |       |       |      | LowEfficiency, CtIsSmall, S <sub>e</sub> |
| vanTC-02    | 11A |       |       |      | CurveFitFailed                           |
| vanTE       | 11A |       |       |      | CurveFitFailed                           |
| vanTG       | 11A |       |       |      | NoAmplification                          |
| vanWB       | 11A |       |       |      | LowEfficiency, CtIsSmall, S <sub>e</sub> |
| vanWG       | 11A | 36.04 | 73.99 | 1.89 |                                          |
| vanXA       | 11A |       |       |      | CurveFitFailed                           |
| vanXB       | 11A |       |       |      | NoAmplification                          |
| vanXD       | 11A | 33.4  | 73.09 | 1.82 |                                          |

|              |     |       |       |      |                              |
|--------------|-----|-------|-------|------|------------------------------|
| vanYB        | 11A | 38.88 | 77.65 | 1.84 |                              |
| vanYD-01     | 11A | 31.34 | 82.67 | 1.89 |                              |
| vanYD-02     | 11A |       |       |      | LowEfficiency, CtIsSmall, S: |
| vatB-01      | 11A |       |       |      | LowEfficiency, CtIsSmall, C: |
| vatB-02      | 11A |       |       |      | LowEfficiency, CtIsSmall, S: |
| vatC-01      | 11A | 33.91 | 81.29 | 1.91 |                              |
| vatC-02      | 11A | 32.26 | 86.26 | 1.94 |                              |
| vatE-01      | 11A | 27.81 | 77.67 | 2.07 |                              |
| vatE-02      | 11A | 33.26 | 79.57 | 2    |                              |
| vgaA-01      | 11A | 37.89 | 79.02 | 1.85 |                              |
| vgaA-02      | 11A |       |       |      | CurveFitFailed               |
| vgb-01       | 11A |       |       |      | CtIsLarge, CurveFitFailed    |
| vgbB-01      | 11A |       |       |      | CurveFitFailed               |
| vgbB-02      | 11A |       |       |      | LowEfficiency, CtIsSmall, S: |
| yceE/mdtG-0  | 11A |       |       |      | BadR2, LowEfficiency, CtIsS: |
| yceE/mdtG-0  | 11A | 44.76 | 81.14 | 1.85 |                              |
| yceL/mdtH-0  | 11A | 30.58 | 76.25 | 1.94 |                              |
| yceL/mdtH-0  | 11A |       |       |      | CurveFitFailed               |
| yceL/mdtH-0  | 11A |       |       |      | LowEfficiency, CtIsSmall, S: |
| yidY/mdtL-01 | 11A | 35.11 | 83.84 | 1.9  |                              |
| yidY/mdtL-02 | 11A |       |       |      | LowEfficiency, CtIsSmall, S: |































| Assay          | Sample | Ct | Tm    | Efficiency | flag                         |
|----------------|--------|----|-------|------------|------------------------------|
| 16S rRNA       | 11B    |    | 15.77 | 81.14      | 2.03                         |
| aac            | 11B    |    | 30.89 | 86.39      | 1.95 MultipleMeltPeaks       |
| aac(6')-Ib(akz | 11B    |    |       |            | LowEfficiency, CtIsSmall, Ct |
| aac(6')-Ib(akz | 11B    |    | 30.75 | 86.38      | 1.98                         |
| aac(6')-Ib(akz | 11B    |    | 33.6  | 79.07      | 1.96                         |
| aac(6')-II     | 11B    |    | 36.35 | 80.89      | 1.72                         |
| aac(6')I1      | 11B    |    |       |            | NoAmplification              |
| aacA/aphD      | 11B    |    |       |            | LowEfficiency, CtIsSmall, Ct |
| aacC           | 11B    |    | 32.28 | 85.37      | 1.92 MultipleMeltPeaks       |
| aacC1          | 11B    |    |       |            | CurveFitFailed               |
| aacC2          | 11B    |    |       |            | NoAmplification              |
| aacC4          | 11B    |    | 36.45 | 81.63      | 1.88                         |
| aadA-01        | 11B    |    | 38.56 | 84.04      | 1.84 MultipleMeltPeaks       |
| aadA-02        | 11B    |    | 35.3  | 86.82      | 1.88                         |
| aadA-1-01      | 11B    |    | 37.27 | 86.28      | 2 MultipleMeltPeaks          |
| aadA-1-02      | 11B    |    |       |            | NoAmplification              |
| aadA1          | 11B    |    | 33.52 | 85.5       | 1.94                         |
| aadA2-01       | 11B    |    | 37.73 | 89.55      | 1.7                          |
| aadA2-02       | 11B    |    | 33.8  | 75.25      | 2.06                         |
| aadA2-03       | 11B    |    |       |            | NoAmplification              |
| aadA5-01       | 11B    |    | 38.17 | 88.99      | 1.71 MultipleMeltPeaks       |
| aadA5-02       | 11B    |    | 35.58 | 83.88      | 1.89 MultipleMeltPeaks       |
| aadA9-01       | 11B    |    | 36.57 | 83.4       | 1.88 MultipleMeltPeaks       |
| aadA9-02       | 11B    |    |       |            | CurveFitFailed               |
| aadD           | 11B    |    |       |            | NoAmplification              |
| aadE           | 11B    |    |       |            | NoAmplification              |
| acrA-01        | 11B    |    | 32.85 | 89.03      | 1.93                         |
| acrA-02        | 11B    |    | 39.54 | 62.47      | 1.75 MultipleMeltPeaks       |
| acrA-03        | 11B    |    |       |            | CurveFitFailed               |
| acrA-04        | 11B    |    | 30.86 | 80.9       | 1.99                         |
| acrA-05        | 11B    |    | 30.41 | 88.42      | 1.94 MultipleMeltPeaks       |
| acrB-01        | 11B    |    |       |            | NoAmplification              |
| acrF           | 11B    |    | 28.23 | 89.41      | 1.92                         |
| acrR-01        | 11B    |    | 32.81 | 84.39      | 1.93 MultipleMeltPeaks       |
| acrR-02        | 11B    |    | 32.75 | 87.05      | 1.9                          |
| Actin          | 11B    |    | 21.64 | 86.89      | 1.96                         |
| adeA           | 11B    |    | 38.42 | 81.54      | 1.75 MultipleMeltPeaks       |
| ampC-01        | 11B    |    | 33.47 | 85.22      | 1.98 MultipleMeltPeaks       |
| ampC-02        | 11B    |    |       |            | NoAmplification              |
| ampC-04        | 11B    |    | 31.44 | 78.81      | 1.86                         |
| ampC-05        | 11B    |    |       |            | NoAmplification              |
| ampC-06        | 11B    |    | 37.63 | 62.23      | 1.91 MultipleMeltPeaks       |
| ampC-07        | 11B    |    | 34.99 | 88.56      | 1.8 MultipleMeltPeaks        |
| ampC-09        | 11B    |    |       |            | NoAmplification              |
| ampC/blaDH     | 11B    |    | 29.84 | 87.61      | 1.94 MultipleMeltPeaks       |

|                          |     |       |       |      |                                          |
|--------------------------|-----|-------|-------|------|------------------------------------------|
| aph                      | 11B |       |       |      | LowEfficiency, CtIsSmall, Ci             |
| aph(2')-Id-01            | 11B |       |       |      | NoAmplification                          |
| aph(2')-Id-02            | 11B |       |       |      | NoAmplification                          |
| aph6ia                   | 11B | 38.36 | 73.64 | 1.86 |                                          |
| aphA1(aka k <sub>z</sub> | 11B |       |       |      | LowEfficiency, CtIsSmall, Ci             |
| bacA-01                  | 11B | 37.24 | 62.35 | 1.94 | MultipleMeltPeaks                        |
| bacA-02                  | 11B |       |       |      | BadR2, LowEfficiency, CtIsS              |
| BETA-globin              | 11B | 23.43 | 84.11 | 1.99 | MultipleMeltPeaks                        |
| bla-ACC-1                | 11B | 41.51 | 62.83 | 1.66 | MultipleMeltPeaks                        |
| bla-L1                   | 11B | 28.98 | 87.66 | 1.99 | MultipleMeltPeaks                        |
| bla1                     | 11B |       |       |      | LowEfficiency, CtIsSmall, S <sub>c</sub> |
| blaCMY                   | 11B | 35.51 | 84.37 | 1.89 |                                          |
| blaCMY2-01               | 11B | 37.95 | 82.45 | 1.96 | MultipleMeltPeaks                        |
| blaCMY2-02               | 11B | 29.23 | 85.79 | 1.99 | MultipleMeltPeaks                        |
| blaCTX-M-01              | 11B |       |       |      | NoAmplification                          |
| blaCTX-M-02              | 11B | 34.32 | 80.13 | 1.89 | MultipleMeltPeaks                        |
| blaCTX-M-03              | 11B | 40.92 | 82.72 | 1.69 | MultipleMeltPeaks                        |
| blaCTX-M-04              | 11B |       |       |      | CurveFitFailed                           |
| blaCTX-M-05              | 11B | 38.44 | 75.67 | 1.64 |                                          |
| blaCTX-M-06              | 11B |       |       |      | NoAmplification                          |
| blaGES                   | 11B |       |       |      | NoAmplification                          |
| blaIMP-01                | 11B |       |       |      | NoAmplification                          |
| blaIMP-02                | 11B |       |       |      | CurveFitFailed                           |
| blaMOX/blaC              | 11B | 38.14 | 82.23 | 1.87 |                                          |
| blaOCH                   | 11B |       |       |      | NoAmplification                          |
| blaOKP                   | 11B |       |       |      | NoAmplification                          |
| blaOXA1/blaC             | 11B |       |       |      | LowEfficiency, CtIsSmall, S <sub>c</sub> |
| blaOXA10-01              | 11B |       |       |      | NoAmplification                          |
| blaOXA10-02              | 11B |       |       |      | CurveFitFailed                           |
| blaOXY                   | 11B | 38.11 | 89.2  | 1.62 | MultipleMeltPeaks                        |
| blaPAO                   | 11B | 37.48 | 81.93 | 1.76 |                                          |
| blaPER                   | 11B | 38.87 | 69.91 | 1.58 | MultipleMeltPeaks                        |
| blaPSE                   | 11B | 38.6  | 79.25 | 1.78 |                                          |
| blaROB                   | 11B |       |       |      | NoAmplification                          |
| blaSFO                   | 11B | 30.84 | 88.76 | 1.97 | MultipleMeltPeaks                        |
| blaSHV-01                | 11B | 34.25 | 76.11 | 1.38 |                                          |
| blaSHV-02                | 11B | 33.4  | 81.87 | 1.97 |                                          |
| blaTEM                   | 11B |       |       |      | NoAmplification                          |
| blaTLA                   | 11B |       |       |      | NoAmplification                          |
| blaVEB                   | 11B |       |       |      | NoAmplification                          |
| blaVIM                   | 11B | 35.83 | 79.38 | 1.89 | MultipleMeltPeaks                        |
| blaZ                     | 11B |       |       |      | NoAmplification                          |
| carB                     | 11B | 34.84 | 89.88 | 1.88 | MultipleMeltPeaks                        |
| catA1                    | 11B |       |       |      | NoAmplification                          |
| catB3                    | 11B |       |       |      | NoAmplification                          |
| catB8                    | 11B | 26.16 | 87.13 | 1.95 |                                          |

|            |     |       |       |      |                             |
|------------|-----|-------|-------|------|-----------------------------|
| ceoA       | 11B | 28.98 | 83.55 | 1.95 | MultipleMeltPeaks           |
| cepA       | 11B |       |       |      | NoAmplification             |
| cfiA       | 11B |       |       |      | NoAmplification             |
| cfr        | 11B |       |       |      | LowEfficiency, CtIsSmall, C |
| cfxA       | 11B | 36.37 | 73.83 | 1.89 |                             |
| cmeA       | 11B |       |       |      | CurveFitFailed              |
| cmlA1-01   | 11B | 39.37 | 80.31 | 1.77 | MultipleMeltPeaks           |
| cmlA1-02   | 11B | 37.64 | 81.39 | 2.06 | MultipleMeltPeaks           |
| cmr        | 11B |       |       |      | CurveFitFailed              |
| cmx(A)     | 11B | 29.81 | 84.7  | 1.94 | MultipleMeltPeaks           |
| cphA-01    | 11B | 32.08 | 85.73 | 1.95 |                             |
| cphA-02    | 11B | 35.56 | 82.7  | 1.88 |                             |
| dfrA1      | 11B | 37.94 | 79.55 | 1.78 | MultipleMeltPeaks           |
| dfrA12     | 11B | 36.87 | 77.73 | 1.87 |                             |
| emrD       | 11B |       |       |      | CurveFitFailed              |
| ereA       | 11B |       |       |      | CurveFitFailed              |
| ereB       | 11B | 35.98 | 87.39 | 1.82 | MultipleMeltPeaks           |
| erm(34)    | 11B |       |       |      | NoAmplification             |
| erm(35)    | 11B | 38.78 | 73.6  | 1.84 |                             |
| erm(36)    | 11B | 35.19 | 86.41 | 1.93 | MultipleMeltPeaks           |
| ermA       | 11B |       |       |      | LowEfficiency, CtIsSmall, C |
| ermA/ermTR | 11B |       |       |      | NoAmplification             |
| ermB       | 11B |       |       |      | LowEfficiency, CtIsSmall, C |
| ermC       | 11B |       |       |      | CurveFitFailed              |
| ermF       | 11B |       |       |      | LowEfficiency, CtIsSmall, S |
| ermJ/ermD  | 11B |       |       |      | NoAmplification             |
| ermK-01    | 11B | 38.03 | 84.3  | 1.88 | MultipleMeltPeaks           |
| ermK-02    | 11B | 35.21 | 86.83 | 1.79 |                             |
| ermT-01    | 11B |       |       |      | NoAmplification             |
| ermT-02    | 11B |       |       |      | CurveFitFailed              |
| ermX       | 11B | 33.63 | 87.17 | 1.84 | MultipleMeltPeaks           |
| ermY       | 11B |       |       |      | NoAmplification             |
| fabK       | 11B | 25.67 | 79.78 | 2.16 |                             |
| floR       | 11B |       |       |      | NoAmplification             |
| folA       | 11B |       |       |      | NoAmplification             |
| fosB       | 11B |       |       |      | LowEfficiency, CtIsSmall, S |
| fosX       | 11B |       |       |      | CurveFitFailed              |
| fox5       | 11B | 29.3  | 86.55 | 1.97 |                             |
| imiR       | 11B |       |       |      | NoAmplification             |
| ImrA-01    | 11B | 32.66 | 82.68 | 1.99 |                             |
| intl       | 11B | 28.09 | 84.68 | 2    | MultipleMeltPeaks           |
| intl1      | 11B | 21.13 | 87.22 | 1.98 |                             |
| IS613      | 11B | 36.79 | 77.92 | 2.93 | BadR2                       |
| lnuA-01    | 11B |       |       |      | CurveFitFailed              |
| lnuB-01    | 11B |       |       |      | NoAmplification             |
| lnuB-02    | 11B |       |       |      | NoAmplification             |

|                |     |       |       |      |                                          |
|----------------|-----|-------|-------|------|------------------------------------------|
| lnuC           | 11B | 33.67 | 84.19 | 1.82 |                                          |
| marR-01        | 11B | 30.43 | 85.54 | 1.95 |                                          |
| matA/mel       | 11B | 28.61 | 82.8  | 2.05 | MultipleMeltPeaks                        |
| mdetI1         | 11B |       |       |      | NoAmplification                          |
| mdtA           | 11B | 34.65 | 82.03 | 1.73 |                                          |
| mdtE/yhiU      | 11B | 38.84 | 83.55 | 1.75 |                                          |
| mecA           | 11B |       |       |      | CurveFitFailed                           |
| mefA           | 11B | 26.55 | 80.54 | 1.97 |                                          |
| mepA           | 11B | 34.24 | 85.54 | 1.97 |                                          |
| mexA           | 11B | 34.91 | 89    | 1.87 | MultipleMeltPeaks                        |
| mexD           | 11B | 31.75 | 80.4  | 2.01 |                                          |
| mexE           | 11B | 37.47 | 79.18 | 1.85 |                                          |
| mexF           | 11B | 28.5  | 85.1  | 2.08 | MultipleMeltPeaks                        |
| mphA-01        | 11B | 28.89 | 87.09 | 2.02 |                                          |
| mphA-02        | 11B | 30.76 | 84.22 | 1.43 | MultipleMeltPeaks                        |
| mphB           | 11B | 30.99 | 76.19 | 2.11 |                                          |
| mphC           | 11B | 34.5  | 86.41 | 1.83 |                                          |
| msrA-01        | 11B |       |       |      | NoAmplification                          |
| msrC-01        | 11B |       |       |      | NoAmplification                          |
| mtrC-01        | 11B | 35.46 | 81.62 | 1.88 | MultipleMeltPeaks                        |
| mtrC-02        | 11B | 33.99 | 84.29 | 1.95 |                                          |
| mtrD-02        | 11B | 27.61 | 81.5  | 1.95 |                                          |
| mtrD-03        | 11B | 34.98 | 76.82 | 1.91 | MultipleMeltPeaks                        |
| NDM1           | 11B |       |       |      | NoAmplification                          |
| nimE           | 11B | 38.33 | 77.5  | 1.94 | MultipleMeltPeaks                        |
| nisB           | 11B | 36.76 | 85.51 | 1.83 |                                          |
| oleC           | 11B |       |       |      | CurveFitFailed                           |
| oprD           | 11B | 28.53 | 85.94 | 2    |                                          |
| oprJ           | 11B |       |       |      | NoAmplification                          |
| pbp            | 11B |       |       |      | LowEfficiency, CtIsSmall, S <sub>e</sub> |
| pbp2x          | 11B | 28.42 | 76.13 | 2    |                                          |
| Pbp5           | 11B |       |       |      | LowEfficiency, CtIsSmall, C <sub>i</sub> |
| penA           | 11B | 35.59 | 85.84 | 1.76 | MultipleMeltPeaks                        |
| pikR1          | 11B | 36.4  | 81.04 | 1.81 | MultipleMeltPeaks                        |
| pikR2          | 11B | 33.01 | 84.91 | 1.99 | MultipleMeltPeaks                        |
| pmrA           | 11B | 33.35 | 79.53 | 2.09 |                                          |
| pncA           | 11B | 34.54 | 84.3  | 1.86 |                                          |
| putative multi | 11B | 38.04 | 73.09 | 1.9  |                                          |
| qac            | 11B | 37.81 | 85.13 | 1.77 | MultipleMeltPeaks                        |
| qacA           | 11B | 31.11 | 70.69 | 1.69 |                                          |
| qacA/qacB      | 11B |       |       |      | NoAmplification                          |
| qacEdelta1-0   | 11B |       |       |      | NoAmplification                          |
| qacEdelta1-0   | 11B | 29.56 | 77.63 | 1.98 |                                          |
| qacH-01        | 11B | 37.46 | 83.47 | 1.8  | MultipleMeltPeaks                        |
| qacH-02        | 11B | 34.63 | 83.64 | 1.67 | MultipleMeltPeaks                        |
| qnrA           | 11B | 36.16 | 83.79 | 1.88 |                                          |



|              |     |       |       |      |                              |
|--------------|-----|-------|-------|------|------------------------------|
| rarD-02      | 11B |       |       |      | NoAmplification              |
| sat4         | 11B |       |       |      | LowEfficiency, CtIsSmall, S: |
| sdeB         | 11B | 36.65 | 84.47 | 1.83 | MultipleMeltPeaks            |
| spcN-01      | 11B |       |       |      | NoAmplification              |
| speA         | 11B |       |       |      | NoAmplification              |
| str          | 11B |       |       |      | NoAmplification              |
| strA         | 11B |       |       |      | LowEfficiency, CtIsSmall, S: |
| strB         | 11B |       |       |      | CurveFitFailed               |
| sul1         | 11B | 31.1  | 90.05 | 1.86 |                              |
| sul2         | 11B | 38.24 | 89.01 | 1.79 | MultipleMeltPeaks            |
| sulA/foIP-01 | 11B | 27.7  | 82.28 | 1.99 |                              |
| sulA/foIP-03 | 11B | 28.55 | 83.86 | 1.94 |                              |
| tet(32)      | 11B |       |       |      | NoAmplification              |
| tet(34)      | 11B | 27.22 | 76.38 | 2.05 |                              |
| tet(35)      | 11B | 38.33 | 84.43 | 1.72 |                              |
| tet(36)-A    | 11B | 44.29 | 61.62 | 1.59 | MultipleMeltPeaks            |
| tet(36)-B    | 11B |       |       |      | NoAmplification              |
| tet(37)      | 11B | 34.76 | 80.58 | 1.84 | MultipleMeltPeaks            |
| tetA-01      | 11B | 33.66 | 85.15 | 1.94 |                              |
| tetA-02      | 11B | 37.28 | 86.76 | 1.8  | MultipleMeltPeaks            |
| tetB-01      | 11B | 33.27 | 86.53 | 1.92 |                              |
| tetB-02      | 11B | 28.46 | 75.42 | 2.11 |                              |
| tetC-01      | 11B |       |       |      | NoAmplification              |
| tetC-02      | 11B |       |       |      | CurveFitFailed               |
| tetD-01      | 11B |       |       |      | LowEfficiency, CtIsSmall, Ci |
| tetD-02      | 11B | 32.47 | 77.19 | 2.04 |                              |
| tetE         | 11B |       |       |      | NoAmplification              |
| tetG-01      | 11B | 32.53 | 82.21 | 2.01 |                              |
| tetG-02      | 11B | 38.05 | 81.98 | 1.77 | MultipleMeltPeaks            |
| tetH         | 11B |       |       |      | NoAmplification              |
| tetJ         | 11B |       |       |      | NoAmplification              |
| tetK         | 11B |       |       |      | LowEfficiency, CtIsSmall, Ci |
| tetL-01      | 11B |       |       |      | LowEfficiency, CtIsSmall, Ci |
| tetL-02      | 11B | 33.25 | 85.4  | 1.87 |                              |
| tetM-01      | 11B | 28.07 | 76.04 | 2    |                              |
| tetM-02      | 11B | 26.43 | 77.89 | 2.06 |                              |
| tetO-01      | 11B | 27.79 | 77.12 | 2.06 |                              |
| tetPA        | 11B |       |       |      | NoAmplification              |
| tetPB-01     | 11B |       |       |      | NoAmplification              |
| tetPB-02     | 11B | 29.5  | 85.13 | 2.03 |                              |
| tetPB-03     | 11B |       |       |      | LowEfficiency, CtIsSmall, S: |
| tetPB-05     | 11B |       |       |      | LowEfficiency, CtIsSmall, S: |
| tetQ         | 11B |       |       |      | NoAmplification              |
| tetR-02      | 11B | 32.97 | 88.2  | 1.92 |                              |
| tetR-03      | 11B |       |       |      | NoAmplification              |
| tetS         | 11B | 34.16 | 85.27 | 2.02 |                              |

|             |     |       |       |      |                              |
|-------------|-----|-------|-------|------|------------------------------|
| tetT        | 11B |       |       |      | NoAmplification              |
| tetU-01     | 11B |       |       |      | NoAmplification              |
| tetV        | 11B |       |       |      | NoAmplification              |
| tetW-01     | 11B |       |       |      | LowEfficiency, CtIsSmall, S: |
| tetX        | 11B |       |       |      | NoAmplification              |
| tnpA-01     | 11B | 34.98 | 84.33 | 1.94 |                              |
| tnpA-02     | 11B | 34.76 | 89.22 | 1.77 |                              |
| tnpA-03     | 11B | 39.79 | 76.25 | 1.83 |                              |
| tnpA-04     | 11B |       |       |      | CurveFitFailed               |
| tnpA-05     | 11B | 38.49 | 82.88 | 1.63 |                              |
| tnpA-07     | 11B |       |       |      | NoAmplification              |
| tolC-01     | 11B | 34.77 | 80.39 | 1.84 |                              |
| tolC-02     | 11B | 28.47 | 87.46 | 2.01 | MultipleMeltPeaks            |
| tolC-03     | 11B | 30.4  | 85.78 | 1.92 |                              |
| Tp614       | 11B | 39.72 | 83.98 | 1.71 | MultipleMeltPeaks            |
| ttgA        | 11B | 36.65 | 63.29 | 2.17 | MultipleMeltPeaks            |
| ttgB        | 11B | 36.96 | 81.46 | 1.82 | MultipleMeltPeaks            |
| vanA        | 11B |       |       |      | NoAmplification              |
| vanB-01     | 11B | 33.15 | 80.76 | 1.95 |                              |
| vanC-01     | 11B | 32.48 | 73.95 | 2.12 |                              |
| vanC-02     | 11B |       |       |      | LowEfficiency, CtIsSmall, Ci |
| vanC-03     | 11B | 26.47 | 86.78 | 1.95 |                              |
| vanC1       | 11B |       |       |      | NoAmplification              |
| vanC2/vanC3 | 11B | 29.5  | 84.77 | 1.99 |                              |
| vanG        | 11B |       |       |      | NoAmplification              |
| vanHB       | 11B |       |       |      | NoAmplification              |
| vanHD       | 11B |       |       |      | NoAmplification              |
| vanRA-01    | 11B |       |       |      | NoAmplification              |
| vanRA-02    | 11B |       |       |      | LowEfficiency, CtIsSmall, Ci |
| vanRB       | 11B | 34.18 | 76.68 | 2.07 |                              |
| vanRC       | 11B |       |       |      | CurveFitFailed               |
| vanRC4      | 11B |       |       |      | LowEfficiency, CtIsSmall, Ci |
| vanRD       | 11B |       |       |      | NoAmplification              |
| vanSA       | 11B |       |       |      | CurveFitFailed               |
| vanSB       | 11B | 27.76 | 75.12 | 2.09 |                              |
| vanSC-01    | 11B | 32.17 | 84.32 | 2.01 | MultipleMeltPeaks            |
| vanSC-02    | 11B |       |       |      | NoAmplification              |
| vanTC-01    | 11B |       |       |      | LowEfficiency, CtIsSmall, S: |
| vanTC-02    | 11B |       |       |      | CurveFitFailed               |
| vanTE       | 11B |       |       |      | CurveFitFailed               |
| vanTG       | 11B |       |       |      | NoAmplification              |
| vanWB       | 11B | 33.58 | 79.86 | 1.92 |                              |
| vanWG       | 11B | 42.14 | 75.75 | 1.7  |                              |
| vanXA       | 11B |       |       |      | CurveFitFailed               |
| vanXB       | 11B |       |       |      | NoAmplification              |
| vanXD       | 11B | 27.93 | 75.87 | 2.11 |                              |

|              |     |       |       |      |                              |
|--------------|-----|-------|-------|------|------------------------------|
| vanYB        | 11B | 32.72 | 84.68 | 1.93 |                              |
| vanYD-01     | 11B | 31.28 | 82.47 | 1.84 | MultipleMeltPeaks            |
| vanYD-02     | 11B |       |       |      | LowEfficiency, CtIsSmall, S: |
| vatB-01      | 11B |       |       |      | LowEfficiency, CtIsSmall, S: |
| vatB-02      | 11B | 32.5  | 80.69 | 2.04 |                              |
| vatC-01      | 11B | 36.1  | 81.22 | 1.86 |                              |
| vatC-02      | 11B | 36.66 | 87.62 | 1.82 |                              |
| vatE-01      | 11B | 27.37 | 77.1  | 2.1  |                              |
| vatE-02      | 11B |       |       |      | NoAmplification              |
| vgaA-01      | 11B |       |       |      | NoAmplification              |
| vgaA-02      | 11B |       |       |      | LowEfficiency, CtIsSmall, S: |
| vgb-01       | 11B | 34.96 | 81.89 | 1.96 |                              |
| vgbB-01      | 11B | 36.69 | 76.11 | 1.74 |                              |
| vgbB-02      | 11B |       |       |      | NoAmplification              |
| yceE/mdtG-0  | 11B | 39.24 | 63.18 | 1.77 | MultipleMeltPeaks            |
| yceE/mdtG-0  | 11B |       |       |      | NoAmplification              |
| yceL/mdtH-0  | 11B | 30.24 | 86.04 | 1.96 | MultipleMeltPeaks            |
| yceL/mdtH-0  | 11B |       |       |      | CurveFitFailed               |
| yceL/mdtH-0  | 11B | 31.62 | 86.28 | 1.89 |                              |
| yidY/mdtL-01 | 11B | 29.6  | 82.74 | 2    |                              |
| yidY/mdtL-02 | 11B | 33.99 | 76.32 | 2.04 |                              |































| Assay          | Sample | Ct | Tm    | Efficiency | flag                         |
|----------------|--------|----|-------|------------|------------------------------|
| 16S rRNA       | 11C    |    | 14.86 | 81.21      | 2.07                         |
| aac            | 11C    |    | 30.84 | 81.1       | 1.94 MultipleMeltPeaks       |
| aac(6')-Ib(akz | 11C    |    |       |            | CurveFitFailed               |
| aac(6')-Ib(akz | 11C    |    | 31.29 | 79.15      | 1.96 MultipleMeltPeaks       |
| aac(6')-Ib(akz | 11C    |    | 32.03 | 84.71      | 1.99 MultipleMeltPeaks       |
| aac(6')-II     | 11C    |    | 37.12 | 81.63      | 1.6                          |
| aac(6')I1      | 11C    |    | 34.73 | 88.78      | 1.85                         |
| aacA/aphD      | 11C    |    |       |            | LowEfficiency, CtIsSmall, S: |
| aacC           | 11C    |    | 31.73 | 87.71      | 1.84 MultipleMeltPeaks       |
| aacC1          | 11C    |    |       |            | LowEfficiency, CtIsSmall, S: |
| aacC2          | 11C    |    |       |            | NoAmplification              |
| aacC4          | 11C    |    | 32.24 | 83.6       | 1.91 MultipleMeltPeaks       |
| aadA-01        | 11C    |    |       |            | CurveFitFailed               |
| aadA-02        | 11C    |    | 36.08 | 80.46      | 1.92                         |
| aadA-1-01      | 11C    |    | 37.01 | 81.96      | 1.93                         |
| aadA-1-02      | 11C    |    |       |            | CurveFitFailed               |
| aadA1          | 11C    |    | 31.46 | 85.51      | 2.09 MultipleMeltPeaks       |
| aadA2-01       | 11C    |    |       |            | CurveFitFailed               |
| aadA2-02       | 11C    |    | 30.5  | 75.62      | 2                            |
| aadA2-03       | 11C    |    |       |            | CurveFitFailed               |
| aadA5-01       | 11C    |    | 36.59 | 89.07      | 1.8                          |
| aadA5-02       | 11C    |    | 33.74 | 86.87      | 1.99                         |
| aadA9-01       | 11C    |    |       |            | CurveFitFailed               |
| aadA9-02       | 11C    |    | 33.47 | 76.48      | 2.09                         |
| aadD           | 11C    |    |       |            | LowEfficiency, CtIsSmall, S: |
| aadE           | 11C    |    |       |            | CurveFitFailed               |
| acrA-01        | 11C    |    | 30.41 | 89.1       | 1.93                         |
| acrA-02        | 11C    |    | 34.47 | 87.87      | 1.88                         |
| acrA-03        | 11C    |    |       |            | CurveFitFailed               |
| acrA-04        | 11C    |    | 30.43 | 80.87      | 1.94                         |
| acrA-05        | 11C    |    | 28.83 | 88.71      | 1.94                         |
| acrB-01        | 11C    |    | 37.46 | 81.34      | 1.93 MultipleMeltPeaks       |
| acrF           | 11C    |    | 27.34 | 82.89      | 1.85                         |
| acrR-01        | 11C    |    | 32.68 | 85.35      | 1.95                         |
| acrR-02        | 11C    |    | 30.59 | 86.46      | 1.93                         |
| Actin          | 11C    |    | 20.89 | 86.92      | 1.98                         |
| adeA           | 11C    |    | 36.91 | 88.22      | 1.85                         |
| ampC-01        | 11C    |    | 30.5  | 84.88      | 2.04 MultipleMeltPeaks       |
| ampC-02        | 11C    |    |       |            | CurveFitFailed               |
| ampC-04        | 11C    |    | 30.94 | 78.47      | 1.9                          |
| ampC-05        | 11C    |    |       |            | LowEfficiency, CtIsSmall, C: |
| ampC-06        | 11C    |    | 33.24 | 84.05      | 2                            |
| ampC-07        | 11C    |    | 35.68 | 81.76      | 1.85 MultipleMeltPeaks       |
| ampC-09        | 11C    |    |       |            | LowEfficiency, CtIsSmall, S: |
| ampC/blaDH     | 11C    |    | 29.04 | 76.72      | 1.99 MultipleMeltPeaks       |

|                            |     |       |       |      |                              |
|----------------------------|-----|-------|-------|------|------------------------------|
| aph                        | 11C |       |       |      | LowEfficiency, CtIsSmall, S: |
| aph(2')-Id-01              | 11C |       |       |      | CurveFitFailed               |
| aph(2')-Id-02              | 11C |       |       |      | CurveFitFailed               |
| aph6ia                     | 11C | 27.64 | 78.43 | 1.97 |                              |
| aphA1(aka k <sub>a</sub> ) | 11C |       |       |      | CurveFitFailed               |
| bacA-01                    | 11C | 37.14 | 76.89 | 1.93 |                              |
| bacA-02                    | 11C | 34.1  | 85.43 | 1.8  | MultipleMeltPeaks            |
| BETA-globin                | 11C | 22.6  | 84.23 | 1.97 |                              |
| bla-ACC-1                  | 11C | 36.86 | 83.16 | 1.84 |                              |
| bla-L1                     | 11C | 29.58 | 85.04 | 2.04 | MultipleMeltPeaks            |
| bla1                       | 11C |       |       |      | LowEfficiency, CtIsSmall, S: |
| blaCMY                     | 11C | 37.15 | 87.45 | 1.82 |                              |
| blaCMY2-01                 | 11C |       |       |      | LowEfficiency, CtIsSmall, S: |
| blaCMY2-02                 | 11C | 27.91 | 85.58 | 2.02 | MultipleMeltPeaks            |
| blaCTX-M-01                | 11C | 34.9  | 77.19 | 1.76 | MultipleMeltPeaks            |
| blaCTX-M-02                | 11C | 31.81 | 79.99 | 1.92 | MultipleMeltPeaks            |
| blaCTX-M-03                | 11C |       |       |      | LowEfficiency, CtIsSmall, S: |
| blaCTX-M-04                | 11C | 34.99 | 86.05 | 1.9  | MultipleMeltPeaks            |
| blaCTX-M-05                | 11C | 31.82 | 77.16 | 1.82 |                              |
| blaCTX-M-06                | 11C | 36.8  | 79.92 | 1.91 |                              |
| blaGES                     | 11C |       |       |      | LowEfficiency, CtIsSmall, S: |
| blaIMP-01                  | 11C |       |       |      | CurveFitFailed               |
| blaIMP-02                  | 11C |       |       |      | LowEfficiency, CtIsSmall, S: |
| blaMOX/blaC                | 11C | 37.68 | 82.24 | 1.84 |                              |
| blaOCH                     | 11C |       |       |      | NoAmplification              |
| blaOKP                     | 11C |       |       |      | NoAmplification              |
| blaOXA1/blaC               | 11C |       |       |      | LowEfficiency, CtIsSmall, S: |
| blaOXA10-01                | 11C |       |       |      | BadR2, LowEfficiency, CtIsS  |
| blaOXA10-02                | 11C |       |       |      | CurveFitFailed               |
| blaOXY                     | 11C | 34.28 | 85.58 | 1.8  | MultipleMeltPeaks            |
| blaPAO                     | 11C |       |       |      | NoAmplification              |
| blaPER                     | 11C |       |       |      | BadR2, LowEfficiency, CtIsS  |
| blaPSE                     | 11C | 37.28 | 78.41 | 1.75 |                              |
| blaROB                     | 11C | 37.44 | 87.21 | 1.7  |                              |
| blaSFO                     | 11C | 30.41 | 82.25 | 1.98 |                              |
| blaSHV-01                  | 11C | 35.61 | 72.7  | 1.39 | MultipleMeltPeaks            |
| blaSHV-02                  | 11C | 32.29 | 80.01 | 1.96 |                              |
| blaTEM                     | 11C |       |       |      | NoAmplification              |
| blaTLA                     | 11C |       |       |      | CurveFitFailed               |
| blaVEB                     | 11C |       |       |      | CurveFitFailed               |
| blaVIM                     | 11C | 33.16 | 81.38 | 1.98 | MultipleMeltPeaks            |
| blaZ                       | 11C |       |       |      | LowEfficiency, CtIsSmall, S: |
| carB                       | 11C |       |       |      | CurveFitFailed               |
| catA1                      | 11C |       |       |      | NoAmplification              |
| catB3                      | 11C | 37.62 | 79.93 | 1.82 | MultipleMeltPeaks            |
| catB8                      | 11C | 28.09 | 81.51 | 2    |                              |

|            |     |       |       |      |                              |
|------------|-----|-------|-------|------|------------------------------|
| ceoA       | 11C | 26.56 | 82.36 | 1.95 | MultipleMeltPeaks            |
| cepA       | 11C |       |       |      | LowEfficiency, CtIsSmall, Ct |
| cfiA       | 11C | 31.57 | 88.15 | 1.89 |                              |
| cfr        | 11C |       |       |      | CurveFitFailed               |
| cfxA       | 11C | 23.27 | 77.96 | 2.09 |                              |
| cmeA       | 11C |       |       |      | CurveFitFailed               |
| cmlA1-01   | 11C | 33.98 | 89.34 | 1.92 |                              |
| cmlA1-02   | 11C | 35.54 | 81.7  | 1.88 |                              |
| cmr        | 11C |       |       |      | CurveFitFailed               |
| cmx(A)     | 11C | 27.95 | 85.74 | 2.01 |                              |
| cphA-01    | 11C | 38.83 | 84.05 | 1.76 | MultipleMeltPeaks            |
| cphA-02    | 11C | 36.74 | 82.79 | 1.91 |                              |
| dfrA1      | 11C |       |       |      | LowEfficiency, CtIsSmall, S: |
| dfrA12     | 11C |       |       |      | CurveFitFailed               |
| emrD       | 11C |       |       |      | LowEfficiency, CtIsSmall, Ct |
| ereA       | 11C | 34.22 | 82.74 | 1.92 |                              |
| ereB       | 11C | 32.49 | 85.64 | 2.08 |                              |
| erm(34)    | 11C |       |       |      | NoAmplification              |
| erm(35)    | 11C |       |       |      | LowEfficiency, CtIsSmall, S: |
| erm(36)    | 11C | 36.55 | 86.38 | 1.81 | MultipleMeltPeaks            |
| ermA       | 11C |       |       |      | LowEfficiency, CtIsSmall, S: |
| ermA/ermTR | 11C | 37.38 | 64.69 | 2.01 | MultipleMeltPeaks            |
| ermB       | 11C | 23.88 | 74.92 | 2.14 |                              |
| ermC       | 11C |       |       |      | LowEfficiency, CtIsSmall, S: |
| ermF       | 11C |       |       |      | LowEfficiency, CtIsSmall, S: |
| ermJ/ermD  | 11C |       |       |      | LowEfficiency, CtIsSmall, S: |
| ermK-01    | 11C |       |       |      | LowEfficiency, CtIsSmall, S: |
| ermK-02    | 11C | 35.53 | 85.99 | 1.79 |                              |
| ermT-01    | 11C |       |       |      | LowEfficiency, CtIsSmall, S: |
| ermT-02    | 11C |       |       |      | CurveFitFailed               |
| ermX       | 11C | 27.31 | 83.93 | 1.88 | MultipleMeltPeaks            |
| ermY       | 11C |       |       |      | LowEfficiency, CtIsSmall, S: |
| fabK       | 11C | 19.5  | 78.03 | 2.23 |                              |
| floR       | 11C | 36.65 | 87.8  | 2.12 | MultipleMeltPeaks            |
| folA       | 11C |       |       |      | NoAmplification              |
| fosB       | 11C |       |       |      | LowEfficiency, CtIsSmall, S: |
| fosX       | 11C |       |       |      | CurveFitFailed               |
| fox5       | 11C | 28.94 | 87.48 | 1.99 |                              |
| imiR       | 11C |       |       |      | NoAmplification              |
| ImrA-01    | 11C | 35.24 | 79.27 | 1.94 |                              |
| intl       | 11C | 28.35 | 84.93 | 2    |                              |
| intl1      | 11C | 20.61 | 87.08 | 2.05 |                              |
| IS613      | 11C | 22.21 | 79.7  | 2.1  |                              |
| lnuA-01    | 11C |       |       |      | LowEfficiency, CtIsSmall, S: |
| lnuB-01    | 11C |       |       |      | LowEfficiency, CtIsSmall, S: |
| lnuB-02    | 11C | 34.56 | 86.85 | 1.94 |                              |

|                |     |       |       |      |                             |
|----------------|-----|-------|-------|------|-----------------------------|
| lnuC           | 11C | 31.58 | 88.32 | 1.83 |                             |
| marR-01        | 11C | 33.86 | 85.57 | 1.91 |                             |
| matA/mel       | 11C | 19.19 | 77.69 | 2.09 |                             |
| mdet1          | 11C |       |       |      | LowEfficiency, CtIsSmall, C |
| mdtA           | 11C | 33.95 | 82.31 | 1.8  | MultipleMeltPeaks           |
| mdtE/yhiU      | 11C | 33.68 | 80.92 | 1.92 |                             |
| mecA           | 11C |       |       |      | LowEfficiency, CtIsSmall, S |
| mefA           | 11C | 18.55 | 80.48 | 1.99 |                             |
| mepA           | 11C | 31.69 | 87.32 | 1.95 |                             |
| mexA           | 11C | 36.22 | 84.32 | 1.86 | MultipleMeltPeaks           |
| mexD           | 11C | 30.44 | 80.63 | 2.03 |                             |
| mexE           | 11C | 37.91 | 87.24 | 1.75 | MultipleMeltPeaks           |
| mexF           | 11C | 28.57 | 85.76 | 2.07 |                             |
| mphA-01        | 11C | 29.97 | 86.73 | 1.94 | MultipleMeltPeaks           |
| mphA-02        | 11C | 28.77 | 86.49 | 1.52 | MultipleMeltPeaks           |
| mphB           | 11C | 36.87 | 82.63 | 1.91 | MultipleMeltPeaks           |
| mphC           | 11C | 32.85 | 85.15 | 1.93 |                             |
| msrA-01        | 11C |       |       |      | LowEfficiency, CtIsSmall, S |
| msrC-01        | 11C |       |       |      | NoAmplification             |
| mtrC-01        | 11C | 34.44 | 80.92 | 1.93 |                             |
| mtrC-02        | 11C | 29.9  | 84.5  | 2.02 |                             |
| mtrD-02        | 11C | 26.34 | 82.66 | 1.95 |                             |
| mtrD-03        | 11C | 30.05 | 88.49 | 1.93 |                             |
| NDM1           | 11C |       |       |      | LowEfficiency, CtIsSmall, S |
| nimE           | 11C |       |       |      | CurveFitFailed              |
| nisB           | 11C | 37.58 | 82.68 | 1.72 |                             |
| oleC           | 11C |       |       |      | BadR2, LowEfficiency, CtIs  |
| oprD           | 11C | 26.98 | 86.78 | 2.03 |                             |
| oprJ           | 11C | 31.77 | 88.26 | 1.97 |                             |
| pbp            | 11C |       |       |      | CurveFitFailed              |
| pbp2x          | 11C | 19.57 | 76.37 | 2.01 |                             |
| Pbp5           | 11C |       |       |      | LowEfficiency, CtIsSmall, S |
| penA           | 11C | 34.27 | 85.92 | 1.79 | MultipleMeltPeaks           |
| pikR1          | 11C | 35.45 | 81.72 | 1.89 |                             |
| pikR2          | 11C | 30.23 | 85.26 | 2.02 |                             |
| pmrA           | 11C | 26.65 | 79.53 | 2.07 |                             |
| pncA           | 11C | 28.1  | 85.29 | 1.87 |                             |
| putative multi | 11C | 32.11 | 84.63 | 2    |                             |
| qac            | 11C | 37.84 | 79.64 | 1.84 | MultipleMeltPeaks           |
| qacA           | 11C | 30.89 | 82.46 | 2.02 |                             |
| qacA/qacB      | 11C |       |       |      | CurveFitFailed              |
| qacEdelta1-0   | 11C |       |       |      | LowEfficiency, CtIsSmall, S |
| qacEdelta1-0   | 11C | 34.13 | 82.43 | 2    |                             |
| qacH-01        | 11C | 32.77 | 87.1  | 1.98 |                             |
| qacH-02        | 11C | 33.39 | 86.31 | 1.71 | MultipleMeltPeaks           |
| qnrA           | 11C |       |       |      | BadR2, LowEfficiency, CtIs  |

|              |     |       |       |      |                              |
|--------------|-----|-------|-------|------|------------------------------|
| rarD-02      | 11C | 36.75 | 85.69 | 1.89 |                              |
| sat4         | 11C |       |       |      | LowEfficiency, CtIsSmall, S: |
| sdeB         | 11C |       |       |      | CurveFitFailed               |
| spcN-01      | 11C | 37.59 | 85.82 | 1.8  |                              |
| speA         | 11C |       |       |      | NoAmplification              |
| str          | 11C |       |       |      | CurveFitFailed               |
| strA         | 11C |       |       |      | LowEfficiency, CtIsSmall, S: |
| strB         | 11C | 38.23 | 85.14 | 1.84 | MultipleMeltPeaks            |
| sul1         | 11C | 33.14 | 88.87 | 2.02 |                              |
| sul2         | 11C |       |       |      | LowEfficiency, CtIsSmall, S: |
| sulA/foIP-01 | 11C | 20    | 80.93 | 2.01 |                              |
| sulA/foIP-03 | 11C | 19.8  | 83.21 | 1.99 |                              |
| tet(32)      | 11C | 24.7  | 81.41 | 1.99 |                              |
| tet(34)      | 11C | 27.39 | 76.35 | 2.05 |                              |
| tet(35)      | 11C | 31.53 | 76.87 | 1.94 |                              |
| tet(36)-A    | 11C | 33.59 | 83.09 | 1.98 |                              |
| tet(36)-B    | 11C | 33.81 | 77.73 | 2.03 |                              |
| tet(37)      | 11C | 26.25 | 80.75 | 2.02 | MultipleMeltPeaks            |
| tetA-01      | 11C | 28.56 | 85.2  | 1.93 |                              |
| tetA-02      | 11C | 35.51 | 85.53 | 1.92 |                              |
| tetB-01      | 11C | 29.55 | 86.55 | 1.97 |                              |
| tetB-02      | 11C | 34.74 | 83.11 | 1.75 |                              |
| tetC-01      | 11C |       |       |      | NoAmplification              |
| tetC-02      | 11C | 37.26 | 83.59 | 1.9  | MultipleMeltPeaks            |
| tetD-01      | 11C |       |       |      | CurveFitFailed               |
| tetD-02      | 11C | 37.59 | 76.1  | 1.91 | MultipleMeltPeaks            |
| tetE         | 11C |       |       |      | LowEfficiency, CtIsSmall, S: |
| tetG-01      | 11C | 34.19 | 82.51 | 1.93 |                              |
| tetG-02      | 11C |       |       |      | CurveFitFailed               |
| tetH         | 11C |       |       |      | LowEfficiency, CtIsSmall, C: |
| tetJ         | 11C |       |       |      | CurveFitFailed               |
| tetK         | 11C |       |       |      | CurveFitFailed               |
| tetL-01      | 11C |       |       |      | CurveFitFailed               |
| tetL-02      | 11C | 32.91 | 85.39 | 1.88 |                              |
| tetM-01      | 11C | 22.17 | 76.05 | 2.03 |                              |
| tetM-02      | 11C | 22.56 | 78.16 | 2.04 |                              |
| tetO-01      | 11C | 22.07 | 77.34 | 2.07 |                              |
| tetPA        | 11C |       |       |      | LowEfficiency, CtIsSmall, S: |
| tetPB-01     | 11C |       |       |      | NoAmplification              |
| tetPB-02     | 11C | 29.4  | 85.11 | 2.06 |                              |
| tetPB-03     | 11C |       |       |      | LowEfficiency, CtIsSmall, S: |
| tetPB-05     | 11C |       |       |      | LowEfficiency, CtIsSmall, S: |
| tetQ         | 11C | 24.49 | 75.9  | 2.04 |                              |
| tetR-02      | 11C | 30.5  | 81.9  | 1.95 | MultipleMeltPeaks            |
| tetR-03      | 11C | 27.91 | 76.05 | 2    |                              |
| tetS         | 11C |       |       |      | CurveFitFailed               |

|             |     |       |       |      |                                          |
|-------------|-----|-------|-------|------|------------------------------------------|
| tetT        | 11C |       |       |      | CurveFitFailed                           |
| tetU-01     | 11C |       |       |      | LowEfficiency, CtIsSmall, S <sub>c</sub> |
| tetV        | 11C |       |       |      | LowEfficiency, CtIsSmall, C <sub>i</sub> |
| tetW-01     | 11C | 25.72 | 82    | 2.05 |                                          |
| tetX        | 11C |       |       |      | BadR2, LowEfficiency, CtIsS              |
| tnpA-01     | 11C |       |       |      | CurveFitFailed                           |
| tnpA-02     | 11C | 34.41 | 82.78 | 1.85 |                                          |
| tnpA-03     | 11C | 36.99 | 74.03 | 2.04 |                                          |
| tnpA-04     | 11C | 34.4  | 81.84 | 1.92 |                                          |
| tnpA-05     | 11C | 32.22 | 83.11 | 1.91 |                                          |
| tnpA-07     | 11C |       |       |      | CurveFitFailed                           |
| tolC-01     | 11C | 32.65 | 81.04 | 1.93 | MultipleMeltPeaks                        |
| tolC-02     | 11C | 28.34 | 85.73 | 2.02 | MultipleMeltPeaks                        |
| tolC-03     | 11C | 29.69 | 85.91 | 1.98 |                                          |
| Tp614       | 11C | 29.94 | 83.18 | 2.01 | MultipleMeltPeaks                        |
| ttgA        | 11C | 37.02 | 87.39 | 1.95 |                                          |
| ttgB        | 11C | 31.36 | 84.76 | 2    | MultipleMeltPeaks                        |
| vanA        | 11C |       |       |      | NoAmplification                          |
| vanB-01     | 11C | 32.48 | 84.01 | 2.12 |                                          |
| vanC-01     | 11C | 35.07 | 74.97 | 2.08 |                                          |
| vanC-02     | 11C |       |       |      | CurveFitFailed                           |
| vanC-03     | 11C | 26.35 | 86.69 | 1.96 |                                          |
| vanC1       | 11C |       |       |      | LowEfficiency, CtIsSmall, S <sub>c</sub> |
| vanC2/vanC3 | 11C | 31.19 | 88.8  | 2.12 | MultipleMeltPeaks                        |
| vanG        | 11C |       |       |      | CurveFitFailed                           |
| vanHB       | 11C | 38.62 | 78.46 | 1.76 | MultipleMeltPeaks                        |
| vanHD       | 11C |       |       |      | CurveFitFailed                           |
| vanRA-01    | 11C |       |       |      | CurveFitFailed                           |
| vanRA-02    | 11C |       |       |      | LowEfficiency, CtIsSmall, S <sub>c</sub> |
| vanRB       | 11C | 31.51 | 88.04 | 2.06 |                                          |
| vanRC       | 11C |       |       |      | LowEfficiency, CtIsSmall, S <sub>c</sub> |
| vanRC4      | 11C |       |       |      | LowEfficiency, CtIsSmall, S <sub>c</sub> |
| vanRD       | 11C |       |       |      | LowEfficiency, CtIsSmall, C <sub>i</sub> |
| vanSA       | 11C |       |       |      | CurveFitFailed                           |
| vanSB       | 11C | 28.82 | 75.08 | 2.06 |                                          |
| vanSC-01    | 11C | 34.1  | 84.46 | 2.06 | MultipleMeltPeaks                        |
| vanSC-02    | 11C | 31.87 | 79.29 | 1.98 |                                          |
| vanTC-01    | 11C |       |       |      | LowEfficiency, CtIsSmall, S <sub>c</sub> |
| vanTC-02    | 11C |       |       |      | BadR2, LowEfficiency, CtIsS              |
| vanTE       | 11C |       |       |      | CurveFitFailed                           |
| vanTG       | 11C |       |       |      | NoAmplification                          |
| vanWB       | 11C |       |       |      | LowEfficiency, CtIsSmall, S <sub>c</sub> |
| vanWG       | 11C | 32.95 | 75.11 | 2.01 |                                          |
| vanXA       | 11C |       |       |      | CurveFitFailed                           |
| vanXB       | 11C |       |       |      | LowEfficiency, CtIsSmall, S <sub>c</sub> |
| vanXD       | 11C | 28.96 | 75.8  | 2.11 |                                          |

|              |     |       |       |      |                              |
|--------------|-----|-------|-------|------|------------------------------|
| vanYB        | 11C | 34.32 | 76.36 | 1.96 | MultipleMeltPeaks            |
| vanYD-01     | 11C | 30.63 | 83.2  | 1.85 |                              |
| vanYD-02     | 11C |       |       |      | CurveFitFailed               |
| vatB-01      | 11C |       |       |      | LowEfficiency, CtIsSmall, S: |
| vatB-02      | 11C | 30.68 | 81.12 | 2.03 |                              |
| vatC-01      | 11C | 33.72 | 81.2  | 1.92 |                              |
| vatC-02      | 11C | 32.85 | 87.48 | 1.94 |                              |
| vatE-01      | 11C | 27.55 | 77.59 | 2.06 |                              |
| vatE-02      | 11C |       |       |      | NoAmplification              |
| vgaA-01      | 11C |       |       |      | LowEfficiency, CtIsSmall, S: |
| vgaA-02      | 11C | 36.93 | 81.64 | 1.88 |                              |
| vgb-01       | 11C |       |       |      | CurveFitFailed               |
| vgbB-01      | 11C | 37    | 76.25 | 1.75 |                              |
| vgbB-02      | 11C |       |       |      | LowEfficiency, CtIsSmall, S: |
| yceE/mdtG-0  | 11C | 37.12 | 77.69 | 1.92 |                              |
| yceE/mdtG-0  | 11C | 33.79 | 81.1  | 2.05 |                              |
| yceL/mdtH-0  | 11C | 27.77 | 76.35 | 1.9  | MultipleMeltPeaks            |
| yceL/mdtH-0  | 11C |       |       |      | LowEfficiency, CtIsSmall, S: |
| yceL/mdtH-0  | 11C | 32.31 | 81.9  | 1.98 | MultipleMeltPeaks            |
| yidY/mdtL-01 | 11C | 28.28 | 84.66 | 2.01 | MultipleMeltPeaks            |
| yidY/mdtL-02 | 11C |       |       |      | CurveFitFailed               |































| Assay          | Sample | Ct | Tm    | Efficiency | flag                   |
|----------------|--------|----|-------|------------|------------------------|
| 16S rRNA       | 12A    |    | 16.45 | 82.07      | 2.02                   |
| aac            | 12A    |    | 30.1  | 86.33      | 1.58 MultipleMeltPeaks |
| aac(6')-Ib(akz | 12A    |    |       |            | NoAmplification        |
| aac(6')-Ib(akz | 12A    |    |       |            | CurveFitFailed         |
| aac(6')-Ib(akz | 12A    |    | 34.49 | 87.21      | 1.71                   |
| aac(6')-II     | 12A    |    | 33.92 | 78.27      | 1.77 MultipleMeltPeaks |
| aac(6')I1      | 12A    |    |       |            | CurveFitFailed         |
| aacA/aphD      | 12A    |    |       |            | NoAmplification        |
| aacC           | 12A    |    |       |            | NoAmplification        |
| aacC1          | 12A    |    |       |            | NoAmplification        |
| aacC2          | 12A    |    |       |            | NoAmplification        |
| aacC4          | 12A    |    | 32.65 | 89.58      | 1.72                   |
| aadA-01        | 12A    |    |       |            | NoAmplification        |
| aadA-02        | 12A    |    | 32.68 | 80.09      | 1.93 MultipleMeltPeaks |
| aadA-1-01      | 12A    |    | 36.52 | 81.32      | 1.82                   |
| aadA-1-02      | 12A    |    |       |            | NoAmplification        |
| aadA1          | 12A    |    | 39.54 | 84.59      | 1.75                   |
| aadA2-01       | 12A    |    | 36.25 | 79.9       | 1.77 MultipleMeltPeaks |
| aadA2-02       | 12A    |    |       |            | NoAmplification        |
| aadA2-03       | 12A    |    |       |            | NoAmplification        |
| aadA5-01       | 12A    |    | 34.94 | 85.18      | 1.89                   |
| aadA5-02       | 12A    |    | 31.92 | 86.29      | 1.97 MultipleMeltPeaks |
| aadA9-01       | 12A    |    | 35.11 | 92.7       | 1.92 MultipleMeltPeaks |
| aadA9-02       | 12A    |    | 37.67 | 89.9       | 1.83                   |
| aadD           | 12A    |    |       |            | NoAmplification        |
| aadE           | 12A    |    |       |            | NoAmplification        |
| acrA-01        | 12A    |    | 31.92 | 88.73      | 2.01                   |
| acrA-02        | 12A    |    | 41.36 | 85.97      | 1.67 MultipleMeltPeaks |
| acrA-03        | 12A    |    | 44.09 | 88.1       | 1.58                   |
| acrA-04        | 12A    |    | 29.62 | 80.53      | 1.97                   |
| acrA-05        | 12A    |    | 28.24 | 89.31      | 1.85                   |
| acrB-01        | 12A    |    |       |            | NoAmplification        |
| acrF           | 12A    |    | 32.82 | 84.47      | 1.72 MultipleMeltPeaks |
| acrR-01        | 12A    |    | 39.81 | 81.1       | 1.64                   |
| acrR-02        | 12A    |    |       |            | NoAmplification        |
| Actin          | 12A    |    | 18.61 | 86.86      | 1.86                   |
| adeA           | 12A    |    |       |            | NoAmplification        |
| ampC-01        | 12A    |    | 32.55 | 85.36      | 1.77                   |
| ampC-02        | 12A    |    |       |            | NoAmplification        |
| ampC-04        | 12A    |    | 32.39 | 78.48      | 1.76                   |
| ampC-05        | 12A    |    |       |            | NoAmplification        |
| ampC-06        | 12A    |    | 30.78 | 77.67      | 1.99                   |
| ampC-07        | 12A    |    |       |            | NoAmplification        |
| ampC-09        | 12A    |    |       |            | NoAmplification        |
| ampC/blaDH     | 12A    |    | 29.97 | 86.65      | 1.92                   |

|                            |     |       |       |      |                                          |
|----------------------------|-----|-------|-------|------|------------------------------------------|
| aph                        | 12A |       |       |      | NoAmplification                          |
| aph(2')-Id-01              | 12A |       |       |      | NoAmplification                          |
| aph(2')-Id-02              | 12A |       |       |      | NoAmplification                          |
| aph6ia                     | 12A |       |       |      | NoAmplification                          |
| aphA1(aka k <sub>z</sub> ) | 12A |       |       |      | NoAmplification                          |
| bacA-01                    | 12A | 44.48 | 72.82 | 1.79 | MultipleMeltPeaks                        |
| bacA-02                    | 12A | 34.94 | 88.36 | 1.89 |                                          |
| BETA-globin                | 12A | 20.84 | 83.89 | 1.98 | MultipleMeltPeaks                        |
| bla-ACC-1                  | 12A | 31.86 | 85.73 | 2.03 | MultipleMeltPeaks                        |
| bla-L1                     | 12A | 31.45 | 84.09 | 1.84 |                                          |
| bla1                       | 12A |       |       |      | NoAmplification                          |
| blaCMY                     | 12A |       |       |      | LowEfficiency, CtIsSmall, S <sub>e</sub> |
| blaCMY2-01                 | 12A |       |       |      | CurveFitFailed                           |
| blaCMY2-02                 | 12A | 29.5  | 85.32 | 1.85 |                                          |
| blaCTX-M-01                | 12A | 30.76 | 89.81 | 2.09 |                                          |
| blaCTX-M-02                | 12A | 32.47 | 84.6  | 1.91 |                                          |
| blaCTX-M-03                | 12A |       |       |      | NoAmplification                          |
| blaCTX-M-04                | 12A | 33.63 | 84.98 | 2    | MultipleMeltPeaks                        |
| blaCTX-M-05                | 12A | 38.65 | 75.27 | 1.52 |                                          |
| blaCTX-M-06                | 12A |       |       |      | NoAmplification                          |
| blaGES                     | 12A |       |       |      | NoAmplification                          |
| blaIMP-01                  | 12A |       |       |      | NoAmplification                          |
| blaIMP-02                  | 12A |       |       |      | NoAmplification                          |
| blaMOX/blaC                | 12A |       |       |      | NoAmplification                          |
| blaOCH                     | 12A |       |       |      | NoAmplification                          |
| blaOKP                     | 12A |       |       |      | NoAmplification                          |
| blaOXA1/blaC               | 12A |       |       |      | NoAmplification                          |
| blaOXA10-01                | 12A |       |       |      | NoAmplification                          |
| blaOXA10-02                | 12A |       |       |      | NoAmplification                          |
| blaOXY                     | 12A | 32.14 | 88.52 | 1.73 | MultipleMeltPeaks                        |
| blaPAO                     | 12A |       |       |      | NoAmplification                          |
| blaPER                     | 12A |       |       |      | NoAmplification                          |
| blaPSE                     | 12A |       |       |      | NoAmplification                          |
| blaROB                     | 12A |       |       |      | NoAmplification                          |
| blaSFO                     | 12A | 36.93 | 89.42 | 1.78 | MultipleMeltPeaks                        |
| blaSHV-01                  | 12A | 33.85 | 75.21 | 1.84 |                                          |
| blaSHV-02                  | 12A |       |       |      | NoAmplification                          |
| blaTEM                     | 12A | 35.02 | 82.64 | 1.59 |                                          |
| blaTLA                     | 12A |       |       |      | NoAmplification                          |
| blaVEB                     | 12A |       |       |      | NoAmplification                          |
| blaVIM                     | 12A |       |       |      | NoAmplification                          |
| blaZ                       | 12A |       |       |      | NoAmplification                          |
| carB                       | 12A |       |       |      | NoAmplification                          |
| catA1                      | 12A |       |       |      | NoAmplification                          |
| catB3                      | 12A | 35.01 | 87.4  | 1.96 | MultipleMeltPeaks                        |
| catB8                      | 12A | 33.66 | 81.86 | 1.87 |                                          |

|            |     |       |       |      |                              |
|------------|-----|-------|-------|------|------------------------------|
| ceoA       | 12A | 30.8  | 82.31 | 2.01 |                              |
| cepA       | 12A |       |       |      | NoAmplification              |
| cfiA       | 12A | 27.68 | 86.14 | 1.88 | MultipleMeltPeaks            |
| cfr        | 12A |       |       |      | NoAmplification              |
| cfxA       | 12A | 26.31 | 77.24 | 1.87 |                              |
| cmeA       | 12A |       |       |      | NoAmplification              |
| cmlA1-01   | 12A |       |       |      | NoAmplification              |
| cmlA1-02   | 12A |       |       |      | NoAmplification              |
| cmr        | 12A |       |       |      | LowEfficiency, CtIsSmall, Ci |
| cmx(A)     | 12A | 28.95 | 86.06 | 1.6  | MultipleMeltPeaks            |
| cphA-01    | 12A | 30.44 | 85.64 | 2    |                              |
| cphA-02    | 12A | 37.96 | 82.43 | 1.77 |                              |
| dfrA1      | 12A |       |       |      | NoAmplification              |
| dfrA12     | 12A | 35.32 | 85.1  | 1.74 | MultipleMeltPeaks            |
| emrD       | 12A | 35.64 | 86.89 | 1.81 | MultipleMeltPeaks            |
| ereA       | 12A |       |       |      | NoAmplification              |
| ereB       | 12A |       |       |      | NoAmplification              |
| erm(34)    | 12A |       |       |      | NoAmplification              |
| erm(35)    | 12A |       |       |      | NoAmplification              |
| erm(36)    | 12A | 41.4  | 87.8  | 1.56 | MultipleMeltPeaks            |
| ermA       | 12A |       |       |      | NoAmplification              |
| ermA/ermTR | 12A |       |       |      | NoAmplification              |
| ermB       | 12A |       |       |      | NoAmplification              |
| ermC       | 12A | 39.49 | 88.55 | 1.74 | MultipleMeltPeaks            |
| ermF       | 12A |       |       |      | NoAmplification              |
| ermJ/ermD  | 12A |       |       |      | NoAmplification              |
| ermK-01    | 12A |       |       |      | NoAmplification              |
| ermK-02    | 12A | 35.38 | 87.78 | 1.78 | MultipleMeltPeaks            |
| ermT-01    | 12A |       |       |      | NoAmplification              |
| ermT-02    | 12A | 37.44 | 79.64 | 1.83 |                              |
| ermX       | 12A |       |       |      | NoAmplification              |
| ermY       | 12A |       |       |      | NoAmplification              |
| fabK       | 12A | 19.48 | 76.74 | 1.85 |                              |
| floR       | 12A | 36.69 | 89.21 | 1.64 | MultipleMeltPeaks            |
| folA       | 12A | 43.76 | 81.84 | 1.58 |                              |
| fosB       | 12A |       |       |      | LowEfficiency, CtIsSmall, S: |
| fosX       | 12A |       |       |      | NoAmplification              |
| fox5       | 12A | 26.41 | 86.17 | 1.96 |                              |
| imiR       | 12A |       |       |      | NoAmplification              |
| ImrA-01    | 12A |       |       |      | NoAmplification              |
| intl       | 12A | 34.14 | 84.64 | 1.81 | MultipleMeltPeaks            |
| intl1      | 12A | 20.42 | 87.23 | 2    |                              |
| IS613      | 12A | 27.38 | 79.18 | 1.63 |                              |
| lnuA-01    | 12A |       |       |      | NoAmplification              |
| lnuB-01    | 12A |       |       |      | NoAmplification              |
| lnuB-02    | 12A |       |       |      | NoAmplification              |

|                |     |       |       |      |                              |
|----------------|-----|-------|-------|------|------------------------------|
| lnuC           | 12A | 35.59 | 84.04 | 1.77 | MultipleMeltPeaks            |
| marR-01        | 12A | 33.98 | 85.16 | 1.86 |                              |
| matA/mel       | 12A | 18.94 | 77.46 | 1.99 |                              |
| mdet1          | 12A |       |       |      | NoAmplification              |
| mdtA           | 12A | 39.19 | 82.03 | 1.61 | MultipleMeltPeaks            |
| mdtE/yhiU      | 12A | 30.27 | 87.25 | 1.91 |                              |
| mecA           | 12A |       |       |      | NoAmplification              |
| mefA           | 12A | 18.4  | 80.27 | 1.98 |                              |
| mepA           | 12A | 40.77 | 84.48 | 1.67 | MultipleMeltPeaks            |
| mexA           | 12A |       |       |      | NoAmplification              |
| mexD           | 12A | 34.91 | 79.45 | 1.96 | MultipleMeltPeaks            |
| mexE           | 12A |       |       |      | NoAmplification              |
| mexF           | 12A | 28.96 | 80.82 | 1.77 | MultipleMeltPeaks            |
| mphA-01        | 12A | 29.76 | 86.68 | 1.98 |                              |
| mphA-02        | 12A | 28.35 | 86.48 | 1.88 |                              |
| mphB           | 12A | 37.07 | 84.66 | 1.8  | MultipleMeltPeaks            |
| mphC           | 12A |       |       |      | NoAmplification              |
| msrA-01        | 12A |       |       |      | NoAmplification              |
| msrC-01        | 12A |       |       |      | NoAmplification              |
| mtrC-01        | 12A |       |       |      | NoAmplification              |
| mtrC-02        | 12A | 34.1  | 84.24 | 1.97 |                              |
| mtrD-02        | 12A | 28.14 | 81.19 | 1.89 |                              |
| mtrD-03        | 12A | 40.83 | 76.05 | 1.69 | MultipleMeltPeaks            |
| NDM1           | 12A |       |       |      | NoAmplification              |
| nimE           | 12A |       |       |      | NoAmplification              |
| nisB           | 12A |       |       |      | NoAmplification              |
| oleC           | 12A |       |       |      | NoAmplification              |
| oprD           | 12A | 29.34 | 86.78 | 1.84 |                              |
| oprJ           | 12A | 36.12 | 88.54 | 1.77 |                              |
| pbp            | 12A |       |       |      | NoAmplification              |
| pbp2x          | 12A | 19.65 | 76.04 | 1.62 |                              |
| Pbp5           | 12A |       |       |      | NoAmplification              |
| penA           | 12A |       |       |      | NoAmplification              |
| pikR1          | 12A |       |       |      | CurveFitFailed               |
| pikR2          | 12A |       |       |      | NoAmplification              |
| pmrA           | 12A | 30.47 | 78.65 | 2.02 |                              |
| pncA           | 12A | 27.37 | 90.06 | 1.93 |                              |
| putative multi | 12A | 33.49 | 83.98 | 1.97 |                              |
| qac            | 12A |       |       |      | LowEfficiency, CtIsSmall, Se |
| qacA           | 12A | 38.02 | 62.21 | 2.1  | BadR2, MultipleMeltPeaks     |
| qacA/qacB      | 12A |       |       |      | NoAmplification              |
| qacEdelta1-0   | 12A |       |       |      | NoAmplification              |
| qacEdelta1-0   | 12A | 37.9  | 85.4  | 1.75 |                              |
| qacH-01        | 12A | 33.57 | 86.46 | 1.96 |                              |
| qacH-02        | 12A | 35.61 | 82.8  | 1.81 |                              |
| qnrA           | 12A | 35.73 | 72.31 | 1.84 | MultipleMeltPeaks            |



|              |     |       |       |      |                               |
|--------------|-----|-------|-------|------|-------------------------------|
| rarD-02      | 12A | 33.34 | 85.71 | 1.91 |                               |
| sat4         | 12A |       |       |      | NoAmplification               |
| sdeB         | 12A |       |       |      | NoAmplification               |
| spcN-01      | 12A |       |       |      | LowEfficiency, CtlIsSmall, Ci |
| speA         | 12A |       |       |      | NoAmplification               |
| str          | 12A |       |       |      | NoAmplification               |
| strA         | 12A |       |       |      | NoAmplification               |
| strB         | 12A |       |       |      | NoAmplification               |
| sul1         | 12A | 33.24 | 89.66 | 1.86 |                               |
| sul2         | 12A |       |       |      | NoAmplification               |
| sulA/foIP-01 | 12A | 22.02 | 80.47 | 2.01 |                               |
| sulA/foIP-03 | 12A | 19.04 | 83.05 | 1.79 |                               |
| tet(32)      | 12A |       |       |      | NoAmplification               |
| tet(34)      | 12A | 29.55 | 75.64 | 1.92 |                               |
| tet(35)      | 12A | 37.16 | 79.94 | 1.84 |                               |
| tet(36)-A    | 12A |       |       |      | NoAmplification               |
| tet(36)-B    | 12A |       |       |      | NoAmplification               |
| tet(37)      | 12A | 28.77 | 75.81 | 1.91 |                               |
| tetA-01      | 12A | 33.33 | 85.03 | 1.95 |                               |
| tetA-02      | 12A | 36.08 | 85.06 | 1.85 | MultipleMeltPeaks             |
| tetB-01      | 12A | 31.12 | 87.67 | 2    | MultipleMeltPeaks             |
| tetB-02      | 12A | 41.23 | 87.12 | 1.52 |                               |
| tetC-01      | 12A |       |       |      | NoAmplification               |
| tetC-02      | 12A |       |       |      | NoAmplification               |
| tetD-01      | 12A |       |       |      | NoAmplification               |
| tetD-02      | 12A | 35.31 | 83.7  | 2    | MultipleMeltPeaks             |
| tetE         | 12A |       |       |      | NoAmplification               |
| tetG-01      | 12A |       |       |      | NoAmplification               |
| tetG-02      | 12A |       |       |      | NoAmplification               |
| tetH         | 12A |       |       |      | NoAmplification               |
| tetJ         | 12A |       |       |      | NoAmplification               |
| tetK         | 12A |       |       |      | NoAmplification               |
| tetL-01      | 12A | 37.36 | 80.94 | 1.68 | MultipleMeltPeaks             |
| tetL-02      | 12A |       |       |      | NoAmplification               |
| tetM-01      | 12A | 23.29 | 76.06 | 2.07 |                               |
| tetM-02      | 12A | 23.11 | 77.46 | 2.11 |                               |
| tetO-01      | 12A | 23.46 | 76.77 | 2.09 |                               |
| tetPA        | 12A |       |       |      | NoAmplification               |
| tetPB-01     | 12A | 32.34 | 83.18 | 1.94 |                               |
| tetPB-02     | 12A | 27.24 | 84.79 | 2.04 |                               |
| tetPB-03     | 12A |       |       |      | NoAmplification               |
| tetPB-05     | 12A |       |       |      | NoAmplification               |
| tetQ         | 12A | 25.18 | 75.59 | 2.04 |                               |
| tetR-02      | 12A | 31.96 | 86.67 | 1.67 | MultipleMeltPeaks             |
| tetR-03      | 12A |       |       |      | NoAmplification               |
| tetS         | 12A | 34.25 | 85.26 | 2.21 |                               |

|             |     |       |       |      |                   |
|-------------|-----|-------|-------|------|-------------------|
| tetT        | 12A |       |       |      | NoAmplification   |
| tetU-01     | 12A |       |       |      | NoAmplification   |
| tetV        | 12A |       |       |      | NoAmplification   |
| tetW-01     | 12A | 25.19 | 81.44 | 2.08 |                   |
| tetX        | 12A |       |       |      | NoAmplification   |
| tnpA-01     | 12A |       |       |      | NoAmplification   |
| tnpA-02     | 12A |       |       |      | NoAmplification   |
| tnpA-03     | 12A | 33.6  | 75.52 | 2.04 |                   |
| tnpA-04     | 12A |       |       |      | NoAmplification   |
| tnpA-05     | 12A |       |       |      | NoAmplification   |
| tnpA-07     | 12A |       |       |      | NoAmplification   |
| tolC-01     | 12A | 35.32 | 88.68 | 1.78 | MultipleMeltPeaks |
| tolC-02     | 12A | 31.46 | 85.41 | 1.87 |                   |
| tolC-03     | 12A | 30.74 | 86.67 | 1.99 |                   |
| Tp614       | 12A | 38.24 | 87.85 | 1.71 | MultipleMeltPeaks |
| ttgA        | 12A | 41.2  | 87.21 | 1.64 |                   |
| ttgB        | 12A | 34.01 | 83.56 | 2    |                   |
| vanA        | 12A |       |       |      | NoAmplification   |
| vanB-01     | 12A | 31.55 | 84.13 | 2.07 | MultipleMeltPeaks |
| vanC-01     | 12A | 32.09 | 73.58 | 2.09 |                   |
| vanC-02     | 12A |       |       |      | NoAmplification   |
| vanC-03     | 12A | 24.64 | 85.65 | 2    | MultipleMeltPeaks |
| vanC1       | 12A |       |       |      | NoAmplification   |
| vanC2/vanC3 | 12A | 30.39 | 84.64 | 1.81 |                   |
| vanG        | 12A |       |       |      | NoAmplification   |
| vanHB       | 12A |       |       |      | NoAmplification   |
| vanHD       | 12A | 33.51 | 87.19 | 1.8  |                   |
| vanRA-01    | 12A |       |       |      | NoAmplification   |
| vanRA-02    | 12A |       |       |      | NoAmplification   |
| vanRB       | 12A |       |       |      | NoAmplification   |
| vanRC       | 12A |       |       |      | NoAmplification   |
| vanRC4      | 12A |       |       |      | NoAmplification   |
| vanRD       | 12A |       |       |      | NoAmplification   |
| vanSA       | 12A |       |       |      | NoAmplification   |
| vanSB       | 12A | 27.67 | 74.8  | 2.06 |                   |
| vanSC-01    | 12A | 33.88 | 83.97 | 1.91 |                   |
| vanSC-02    | 12A |       |       |      | NoAmplification   |
| vanTC-01    | 12A |       |       |      | NoAmplification   |
| vanTC-02    | 12A | 34.54 | 86.32 | 1.81 |                   |
| vanTE       | 12A |       |       |      | NoAmplification   |
| vanTG       | 12A |       |       |      | NoAmplification   |
| vanWB       | 12A |       |       |      | NoAmplification   |
| vanWG       | 12A | 39.55 | 74    | 1.75 | MultipleMeltPeaks |
| vanXA       | 12A | 37.1  | 89.03 | 1.75 | MultipleMeltPeaks |
| vanXB       | 12A |       |       |      | NoAmplification   |
| vanXD       | 12A | 29.46 | 75.18 | 2.07 |                   |

|              |     |       |       |      |                               |
|--------------|-----|-------|-------|------|-------------------------------|
| vanYB        | 12A | 31.03 | 84.01 | 2    |                               |
| vanYD-01     | 12A | 28.55 | 82.64 | 1.8  | MultipleMeltPeaks             |
| vanYD-02     | 12A | 36.99 | 79.81 | 1.85 |                               |
| vatB-01      | 12A |       |       |      | NoAmplification               |
| vatB-02      | 12A |       |       |      | NoAmplification               |
| vatC-01      | 12A | 33.61 | 81.21 | 1.91 |                               |
| vatC-02      | 12A |       |       |      | NoAmplification               |
| vatE-01      | 12A | 28.93 | 77.48 | 1.95 |                               |
| vatE-02      | 12A |       |       |      | NoAmplification               |
| vgaA-01      | 12A |       |       |      | LowEfficiency, CtlIsSmall, S: |
| vgaA-02      | 12A |       |       |      | NoAmplification               |
| vgb-01       | 12A | 44.57 | 62.11 | 2.03 | BadR2, MultipleMeltPeaks      |
| vgbB-01      | 12A |       |       |      | NoAmplification               |
| vgbB-02      | 12A |       |       |      | NoAmplification               |
| yceE/mdtG-0  | 12A | 35.7  | 77.3  | 1.96 |                               |
| yceE/mdtG-0  | 12A |       |       |      | NoAmplification               |
| yceL/mdtH-0  | 12A | 31.08 | 85.13 | 1.78 |                               |
| yceL/mdtH-0  | 12A |       |       |      | NoAmplification               |
| yceL/mdtH-0  | 12A | 37.06 | 86.62 | 1.69 | MultipleMeltPeaks             |
| yidY/mdtL-01 | 12A | 30.5  | 82.29 | 2.05 |                               |
| yidY/mdtL-02 | 12A |       |       |      | NoAmplification               |































| Assay           | Sample | Ct | Tm    | Efficiency | flag                   |
|-----------------|--------|----|-------|------------|------------------------|
| 16S rRNA        | 12B    |    | 24.55 | 81.87      | 1.99                   |
| aac             | 12B    |    | 34.94 | 81         | 1.88                   |
| aac(6')-Ib(akz) | 12B    |    |       |            | NoAmplification        |
| aac(6')-Ib(akz) | 12B    |    | 34.51 | 82.92      | 1.88 MultipleMeltPeaks |
| aac(6')-Ib(akz) | 12B    |    |       |            | CurveFitFailed         |
| aac(6')-II      | 12B    |    | 36.64 | 87.15      | 1.76                   |
| aac(6')I1       | 12B    |    | 35.17 | 71.76      | 1.97                   |
| aacA/aphD       | 12B    |    |       |            | NoAmplification        |
| aacC            | 12B    |    | 35.52 | 72.73      | 1.73                   |
| aacC1           | 12B    |    |       |            | NoAmplification        |
| aacC2           | 12B    |    |       |            | NoAmplification        |
| aacC4           | 12B    |    |       |            | NoAmplification        |
| aadA-01         | 12B    |    |       |            | NoAmplification        |
| aadA-02         | 12B    |    |       |            | NoAmplification        |
| aadA-1-01       | 12B    |    |       |            | NoAmplification        |
| aadA-1-02       | 12B    |    |       |            | NoAmplification        |
| aadA1           | 12B    |    |       |            | NoAmplification        |
| aadA2-01        | 12B    |    |       |            | NoAmplification        |
| aadA2-02        | 12B    |    |       |            | NoAmplification        |
| aadA2-03        | 12B    |    |       |            | NoAmplification        |
| aadA5-01        | 12B    |    | 40.56 | 74.75      | 1.67 MultipleMeltPeaks |
| aadA5-02        | 12B    |    | 37.76 | 78.21      | 1.91                   |
| aadA9-01        | 12B    |    |       |            | NoAmplification        |
| aadA9-02        | 12B    |    |       |            | NoAmplification        |
| aadD            | 12B    |    |       |            | NoAmplification        |
| aadE            | 12B    |    |       |            | NoAmplification        |
| acrA-01         | 12B    |    | 34.55 | 88.87      | 1.84                   |
| acrA-02         | 12B    |    | 39.63 | 77.3       | 1.67 MultipleMeltPeaks |
| acrA-03         | 12B    |    |       |            | NoAmplification        |
| acrA-04         | 12B    |    |       |            | NoAmplification        |
| acrA-05         | 12B    |    | 38.25 | 80.3       | 1.68 MultipleMeltPeaks |
| acrB-01         | 12B    |    | 33.91 | 78.16      | 2.02                   |
| acrF            | 12B    |    | 35.04 | 81.8       | 1.85 MultipleMeltPeaks |
| acrR-01         | 12B    |    | 39.47 | 81.94      | 1.67 MultipleMeltPeaks |
| acrR-02         | 12B    |    |       |            | NoAmplification        |
| Actin           | 12B    |    | 26.1  | 83.59      | 1.92                   |
| adeA            | 12B    |    |       |            | NoAmplification        |
| ampC-01         | 12B    |    | 38.44 | 80.27      | 1.68 MultipleMeltPeaks |
| ampC-02         | 12B    |    |       |            | NoAmplification        |
| ampC-04         | 12B    |    | 44.99 | 61.66      | 1.57 MultipleMeltPeaks |
| ampC-05         | 12B    |    |       |            | NoAmplification        |
| ampC-06         | 12B    |    |       |            | NoAmplification        |
| ampC-07         | 12B    |    |       |            | NoAmplification        |
| ampC-09         | 12B    |    | 38.71 | 85.61      | 1.66 MultipleMeltPeaks |
| ampC/blaDH      | 12B    |    | 34.95 | 84.57      | 1.81                   |

|                          |     |       |       |      |                   |
|--------------------------|-----|-------|-------|------|-------------------|
| aph                      | 12B |       |       |      | NoAmplification   |
| aph(2')-Id-01            | 12B |       |       |      | NoAmplification   |
| aph(2')-Id-02            | 12B |       |       |      | NoAmplification   |
| aph6ia                   | 12B | 35.74 | 82.06 | 1.86 |                   |
| aphA1(aka k <sub>a</sub> | 12B |       |       |      | NoAmplification   |
| bacA-01                  | 12B |       |       |      | CurveFitFailed    |
| bacA-02                  | 12B | 42.52 | 62    | 1.62 | MultipleMeltPeaks |
| BETA-globin              | 12B | 29.17 | 84.04 | 1.95 |                   |
| bla-ACC-1                | 12B |       |       |      | NoAmplification   |
| bla-L1                   | 12B | 35.72 | 83.28 | 1.77 |                   |
| bla1                     | 12B |       |       |      | NoAmplification   |
| blaCMY                   | 12B |       |       |      | NoAmplification   |
| blaCMY2-01               | 12B |       |       |      | NoAmplification   |
| blaCMY2-02               | 12B | 34.22 | 84.14 | 1.92 | MultipleMeltPeaks |
| blaCTX-M-01              | 12B | 33.99 | 77.71 | 2.13 |                   |
| blaCTX-M-02              | 12B | 39.23 | 83.65 | 1.71 |                   |
| blaCTX-M-03              | 12B |       |       |      | NoAmplification   |
| blaCTX-M-04              | 12B |       |       |      | NoAmplification   |
| blaCTX-M-05              | 12B | 36.17 | 75.28 | 1.8  |                   |
| blaCTX-M-06              | 12B |       |       |      | NoAmplification   |
| blaGES                   | 12B |       |       |      | NoAmplification   |
| blaIMP-01                | 12B |       |       |      | NoAmplification   |
| blaIMP-02                | 12B |       |       |      | NoAmplification   |
| blaMOX/blaC              | 12B |       |       |      | NoAmplification   |
| blaOCH                   | 12B |       |       |      | NoAmplification   |
| blaOKP                   | 12B |       |       |      | NoAmplification   |
| blaOXA1/blaC             | 12B |       |       |      | NoAmplification   |
| blaOXA10-01              | 12B |       |       |      | NoAmplification   |
| blaOXA10-02              | 12B | 32.42 | 76.13 | 2.05 |                   |
| blaOXY                   | 12B | 38.5  | 83.92 | 1.63 | MultipleMeltPeaks |
| blaPAO                   | 12B |       |       |      | NoAmplification   |
| blaPER                   | 12B | 36.13 | 69.89 | 1.64 | MultipleMeltPeaks |
| blaPSE                   | 12B |       |       |      | NoAmplification   |
| blaROB                   | 12B |       |       |      | NoAmplification   |
| blaSFO                   | 12B | 35.59 | 84.25 | 1.79 | MultipleMeltPeaks |
| blaSHV-01                | 12B | 32.92 | 85.26 | 1.89 |                   |
| blaSHV-02                | 12B | 34.12 | 84.25 | 1.94 |                   |
| blaTEM                   | 12B | 28.54 | 79.41 | 1.98 |                   |
| blaTLA                   | 12B |       |       |      | NoAmplification   |
| blaVEB                   | 12B |       |       |      | NoAmplification   |
| blaVIM                   | 12B |       |       |      | NoAmplification   |
| blaZ                     | 12B |       |       |      | NoAmplification   |
| carB                     | 12B |       |       |      | NoAmplification   |
| catA1                    | 12B |       |       |      | NoAmplification   |
| catB3                    | 12B |       |       |      | NoAmplification   |
| catB8                    | 12B | 30.25 | 81.17 | 1.93 |                   |

|            |     |       |       |      |                              |
|------------|-----|-------|-------|------|------------------------------|
| ceoA       | 12B |       |       |      | CurveFitFailed               |
| cepA       | 12B |       |       |      | NoAmplification              |
| cfiA       | 12B |       |       |      | NoAmplification              |
| cfr        | 12B |       |       |      | NoAmplification              |
| cfxA       | 12B | 35.89 | 74    | 2.09 |                              |
| cmeA       | 12B |       |       |      | NoAmplification              |
| cmlA1-01   | 12B |       |       |      | NoAmplification              |
| cmlA1-02   | 12B |       |       |      | NoAmplification              |
| cmr        | 12B |       |       |      | NoAmplification              |
| cmx(A)     | 12B | 31.71 | 84.51 | 1.93 |                              |
| cphA-01    | 12B | 38.87 | 79.23 | 1.78 | MultipleMeltPeaks            |
| cphA-02    | 12B | 35.81 | 78    | 1.9  |                              |
| dfrA1      | 12B |       |       |      | NoAmplification              |
| dfrA12     | 12B | 40.33 | 82.79 | 1.66 | MultipleMeltPeaks            |
| emrD       | 12B |       |       |      | NoAmplification              |
| ereA       | 12B | 35.49 | 85.55 | 1.83 |                              |
| ereB       | 12B |       |       |      | NoAmplification              |
| erm(34)    | 12B |       |       |      | NoAmplification              |
| erm(35)    | 12B |       |       |      | NoAmplification              |
| erm(36)    | 12B | 37.47 | 84.19 | 1.78 | MultipleMeltPeaks            |
| ermA       | 12B |       |       |      | NoAmplification              |
| ermA/ermTR | 12B |       |       |      | NoAmplification              |
| ermB       | 12B |       |       |      | NoAmplification              |
| ermC       | 12B |       |       |      | NoAmplification              |
| ermF       | 12B |       |       |      | NoAmplification              |
| ermJ/ermD  | 12B |       |       |      | NoAmplification              |
| ermK-01    | 12B |       |       |      | NoAmplification              |
| ermK-02    | 12B | 38.05 | 86.05 | 1.73 | MultipleMeltPeaks            |
| ermT-01    | 12B |       |       |      | NoAmplification              |
| ermT-02    | 12B |       |       |      | NoAmplification              |
| ermX       | 12B | 33.16 | 87.49 | 1.86 |                              |
| ermY       | 12B |       |       |      | NoAmplification              |
| fabK       | 12B | 26.38 | 77.58 | 2.13 |                              |
| floR       | 12B |       |       |      | NoAmplification              |
| folA       | 12B |       |       |      | NoAmplification              |
| fosB       | 12B |       |       |      | LowEfficiency, CtIsSmall, S: |
| fosX       | 12B |       |       |      | NoAmplification              |
| fox5       | 12B | 33.33 | 86.47 | 1.92 |                              |
| imiR       | 12B |       |       |      | NoAmplification              |
| ImrA-01    | 12B |       |       |      | NoAmplification              |
| intl       | 12B | 33.3  | 86.97 | 1.9  | MultipleMeltPeaks            |
| intl1      | 12B | 23.61 | 88.01 | 2    | MultipleMeltPeaks            |
| IS613      | 12B |       |       |      | NoAmplification              |
| lnuA-01    | 12B |       |       |      | NoAmplification              |
| lnuB-01    | 12B |       |       |      | NoAmplification              |
| lnuB-02    | 12B |       |       |      | NoAmplification              |

|                |     |       |       |      |                   |
|----------------|-----|-------|-------|------|-------------------|
| lnuC           | 12B | 37    | 83.83 | 1.66 |                   |
| marR-01        | 12B |       |       |      | NoAmplification   |
| matA/mel       | 12B | 27.27 | 77.36 | 2.03 |                   |
| mdet1          | 12B |       |       |      | NoAmplification   |
| mdtA           | 12B | 37.7  | 62.63 | 1.88 | MultipleMeltPeaks |
| mdtE/yhiU      | 12B |       |       |      | NoAmplification   |
| mecA           | 12B |       |       |      | NoAmplification   |
| mefA           | 12B | 26.23 | 80.46 | 1.97 |                   |
| mepA           | 12B | 35.97 | 78.87 | 1.87 | MultipleMeltPeaks |
| mexA           | 12B |       |       |      | NoAmplification   |
| mexD           | 12B | 38.41 | 79.61 | 1.93 |                   |
| mexE           | 12B |       |       |      | NoAmplification   |
| mexF           | 12B | 34.05 | 81.88 | 1.77 |                   |
| mphA-01        | 12B | 29.28 | 87.08 | 1.94 |                   |
| mphA-02        | 12B | 32.21 | 76.96 | 1.69 | MultipleMeltPeaks |
| mphB           | 12B |       |       |      | CurveFitFailed    |
| mphC           | 12B | 38.23 | 84.68 | 1.69 |                   |
| msrA-01        | 12B |       |       |      | NoAmplification   |
| msrC-01        | 12B |       |       |      | NoAmplification   |
| mtrC-01        | 12B |       |       |      | CurveFitFailed    |
| mtrC-02        | 12B | 39.43 | 83.21 | 1.69 | MultipleMeltPeaks |
| mtrD-02        | 12B | 30.99 | 80.9  | 1.92 |                   |
| mtrD-03        | 12B |       |       |      | NoAmplification   |
| NDM1           | 12B |       |       |      | NoAmplification   |
| nimE           | 12B | 30.21 | 76.35 | 1.96 |                   |
| nisB           | 12B | 30.63 | 76.99 | 1.97 |                   |
| oleC           | 12B |       |       |      | NoAmplification   |
| oprD           | 12B | 35.06 | 86.63 | 1.89 |                   |
| oprJ           | 12B |       |       |      | NoAmplification   |
| pbp            | 12B |       |       |      | NoAmplification   |
| pbp2x          | 12B | 26.84 | 76    | 2.03 |                   |
| Pbp5           | 12B |       |       |      | NoAmplification   |
| penA           | 12B |       |       |      | NoAmplification   |
| pikR1          | 12B |       |       |      | NoAmplification   |
| pikR2          | 12B |       |       |      | CurveFitFailed    |
| pmrA           | 12B |       |       |      | NoAmplification   |
| pncA           | 12B | 37.63 | 81.41 | 1.7  |                   |
| putative multi | 12B | 32.2  | 72.68 | 2.02 |                   |
| qac            | 12B |       |       |      | NoAmplification   |
| qacA           | 12B |       |       |      | CurveFitFailed    |
| qacA/qacB      | 12B |       |       |      | NoAmplification   |
| qacEdelta1-0   | 12B |       |       |      | NoAmplification   |
| qacEdelta1-0   | 12B | 28.17 | 77.31 | 2.01 |                   |
| qacH-01        | 12B | 36.43 | 86.24 | 1.8  | MultipleMeltPeaks |
| qacH-02        | 12B | 39.11 | 85.81 | 1.57 | MultipleMeltPeaks |
| qnrA           | 12B | 36.35 | 73.3  | 1.97 |                   |

|              |     |       |       |      |                   |
|--------------|-----|-------|-------|------|-------------------|
| rarD-02      | 12B | 38.01 | 83.48 | 1.78 |                   |
| sat4         | 12B |       |       |      | NoAmplification   |
| sdeB         | 12B |       |       |      | NoAmplification   |
| spcN-01      | 12B |       |       |      | NoAmplification   |
| speA         | 12B |       |       |      | NoAmplification   |
| str          | 12B |       |       |      | NoAmplification   |
| strA         | 12B |       |       |      | NoAmplification   |
| strB         | 12B | 40.03 | 83.5  | 1.52 |                   |
| sul1         | 12B |       |       |      | NoAmplification   |
| sul2         | 12B |       |       |      | NoAmplification   |
| sulA/foIP-01 | 12B | 26.47 | 80.68 | 1.97 |                   |
| sulA/foIP-03 | 12B | 28.16 | 82.71 | 1.97 |                   |
| tet(32)      | 12B |       |       |      | NoAmplification   |
| tet(34)      | 12B | 26.61 | 76.46 | 2.06 |                   |
| tet(35)      | 12B |       |       |      | NoAmplification   |
| tet(36)-A    | 12B |       |       |      | NoAmplification   |
| tet(36)-B    | 12B |       |       |      | NoAmplification   |
| tet(37)      | 12B | 33.06 | 82.04 | 1.89 | MultipleMeltPeaks |
| tetA-01      | 12B | 33.93 | 85.08 | 1.92 |                   |
| tetA-02      | 12B |       |       |      | NoAmplification   |
| tetB-01      | 12B | 32.97 | 86.26 | 1.83 |                   |
| tetB-02      | 12B | 34.59 | 77.32 | 1.93 |                   |
| tetC-01      | 12B |       |       |      | NoAmplification   |
| tetC-02      | 12B |       |       |      | NoAmplification   |
| tetD-01      | 12B |       |       |      | NoAmplification   |
| tetD-02      | 12B | 38.5  | 76.07 | 1.81 |                   |
| tetE         | 12B |       |       |      | NoAmplification   |
| tetG-01      | 12B | 32.23 | 82.03 | 1.95 |                   |
| tetG-02      | 12B | 43.12 | 62.58 | 1.5  | MultipleMeltPeaks |
| tetH         | 12B |       |       |      | NoAmplification   |
| tetJ         | 12B |       |       |      | NoAmplification   |
| tetK         | 12B |       |       |      | NoAmplification   |
| tetL-01      | 12B |       |       |      | NoAmplification   |
| tetL-02      | 12B | 36.65 | 85.25 | 1.73 |                   |
| tetM-01      | 12B |       |       |      | NoAmplification   |
| tetM-02      | 12B |       |       |      | NoAmplification   |
| tetO-01      | 12B |       |       |      | NoAmplification   |
| tetPA        | 12B |       |       |      | NoAmplification   |
| tetPB-01     | 12B | 38.55 | 83.45 | 1.82 |                   |
| tetPB-02     | 12B | 30.88 | 85.07 | 1.98 |                   |
| tetPB-03     | 12B |       |       |      | NoAmplification   |
| tetPB-05     | 12B |       |       |      | NoAmplification   |
| tetQ         | 12B |       |       |      | NoAmplification   |
| tetR-02      | 12B | 36.14 | 90.22 | 1.72 |                   |
| tetR-03      | 12B |       |       |      | NoAmplification   |
| tetS         | 12B |       |       |      | NoAmplification   |

|             |     |       |       |      |                             |
|-------------|-----|-------|-------|------|-----------------------------|
| tetT        | 12B |       |       |      | NoAmplification             |
| tetU-01     | 12B |       |       |      | NoAmplification             |
| tetV        | 12B |       |       |      | NoAmplification             |
| tetW-01     | 12B |       |       |      | NoAmplification             |
| tetX        | 12B |       |       |      | NoAmplification             |
| tnpA-01     | 12B |       |       |      | NoAmplification             |
| tnpA-02     | 12B | 37.79 | 65.08 | 1.76 | MultipleMeltPeaks           |
| tnpA-03     | 12B |       |       |      | CurveFitFailed              |
| tnpA-04     | 12B |       |       |      | CurveFitFailed              |
| tnpA-05     | 12B |       |       |      | NoAmplification             |
| tnpA-07     | 12B |       |       |      | NoAmplification             |
| tolC-01     | 12B | 38.94 | 81.92 | 1.74 | MultipleMeltPeaks           |
| tolC-02     | 12B | 33.14 | 89.57 | 1.9  |                             |
| tolC-03     | 12B |       |       |      | NoAmplification             |
| Tp614       | 12B | 40.41 | 82.17 | 1.72 | MultipleMeltPeaks           |
| ttgA        | 12B |       |       |      | NoAmplification             |
| ttgB        | 12B |       |       |      | NoAmplification             |
| vanA        | 12B |       |       |      | NoAmplification             |
| vanB-01     | 12B | 44.27 | 62.86 | 1.37 | MultipleMeltPeaks           |
| vanC-01     | 12B |       |       |      | NoAmplification             |
| vanC-02     | 12B |       |       |      | NoAmplification             |
| vanC-03     | 12B | 31.2  | 85.74 | 1.91 |                             |
| vanC1       | 12B |       |       |      | NoAmplification             |
| vanC2/vanC3 | 12B | 35.24 | 83.53 | 1.83 | MultipleMeltPeaks           |
| vanG        | 12B |       |       |      | NoAmplification             |
| vanHB       | 12B |       |       |      | NoAmplification             |
| vanHD       | 12B |       |       |      | NoAmplification             |
| vanRA-01    | 12B |       |       |      | NoAmplification             |
| vanRA-02    | 12B |       |       |      | NoAmplification             |
| vanRB       | 12B |       |       |      | NoAmplification             |
| vanRC       | 12B |       |       |      | NoAmplification             |
| vanRC4      | 12B |       |       |      | NoAmplification             |
| vanRD       | 12B |       |       |      | NoAmplification             |
| vanSA       | 12B |       |       |      | NoAmplification             |
| vanSB       | 12B | 28.3  | 74.92 | 2.09 |                             |
| vanSC-01    | 12B | 37.96 | 83.75 | 1.79 |                             |
| vanSC-02    | 12B |       |       |      | NoAmplification             |
| vanTC-01    | 12B |       |       |      | NoAmplification             |
| vanTC-02    | 12B |       |       |      | NoAmplification             |
| vanTE       | 12B |       |       |      | NoAmplification             |
| vanTG       | 12B |       |       |      | NoAmplification             |
| vanWB       | 12B |       |       |      | NoAmplification             |
| vanWG       | 12B |       |       |      | NoAmplification             |
| vanXA       | 12B |       |       |      | LowEfficiency, CurveFitFail |
| vanXB       | 12B |       |       |      | NoAmplification             |
| vanXD       | 12B | 27.91 | 75.58 | 2.09 |                             |

|              |     |       |       |      |                   |
|--------------|-----|-------|-------|------|-------------------|
| vanYB        | 12B | 38.24 | 78.87 | 1.79 | MultipleMeltPeaks |
| vanYD-01     | 12B |       |       |      | CurveFitFailed    |
| vanYD-02     | 12B |       |       |      | NoAmplification   |
| vatB-01      | 12B |       |       |      | NoAmplification   |
| vatB-02      | 12B |       |       |      | NoAmplification   |
| vatC-01      | 12B |       |       |      | NoAmplification   |
| vatC-02      | 12B |       |       |      | NoAmplification   |
| vatE-01      | 12B | 26.95 | 77.02 | 2.1  |                   |
| vatE-02      | 12B |       |       |      | NoAmplification   |
| vgaA-01      | 12B |       |       |      | NoAmplification   |
| vgaA-02      | 12B | 39.46 | 62.75 | 1.77 | MultipleMeltPeaks |
| vgb-01       | 12B |       |       |      | CurveFitFailed    |
| vgbB-01      | 12B | 38.22 | 86.79 | 1.75 |                   |
| vgbB-02      | 12B |       |       |      | NoAmplification   |
| yceE/mdtG-0  | 12B |       |       |      | NoAmplification   |
| yceE/mdtG-0  | 12B |       |       |      | NoAmplification   |
| yceL/mdtH-0  | 12B | 31.47 | 86.32 | 1.9  |                   |
| yceL/mdtH-0  | 12B |       |       |      | NoAmplification   |
| yceL/mdtH-0  | 12B |       |       |      | CurveFitFailed    |
| yidY/mdtL-01 | 12B | 32.1  | 88.75 | 1.89 |                   |
| yidY/mdtL-02 | 12B | 39.05 | 74.66 | 1.8  |                   |































| Assay          | Sample | Ct | Tm    | Efficiency | flag                   |
|----------------|--------|----|-------|------------|------------------------|
| 16S rRNA       | 12C    |    | 20.6  | 82.03      | 1.87                   |
| aac            | 12C    |    | 28.92 | 81.83      | 1.59 MultipleMeltPeaks |
| aac(6')-Ib(akz | 12C    |    | 35.02 | 80.73      | 1.88 MultipleMeltPeaks |
| aac(6')-Ib(akz | 12C    |    | 28.6  | 85.43      | 1.98 MultipleMeltPeaks |
| aac(6')-Ib(akz | 12C    |    | 35.06 | 87.24      | 1.84 MultipleMeltPeaks |
| aac(6')-II     | 12C    |    | 30.54 | 84.31      | 1.73 MultipleMeltPeaks |
| aac(6')I1      | 12C    |    | 39.55 | 88.38      | 1.6                    |
| aacA/aphD      | 12C    |    |       |            | NoAmplification        |
| aacC           | 12C    |    | 31.42 | 85.15      | 1.74                   |
| aacC1          | 12C    |    |       |            | NoAmplification        |
| aacC2          | 12C    |    |       |            | NoAmplification        |
| aacC4          | 12C    |    | 32.94 | 87.37      | 1.79 MultipleMeltPeaks |
| aadA-01        | 12C    |    |       |            | NoAmplification        |
| aadA-02        | 12C    |    | 35.25 | 80.3       | 1.84                   |
| aadA-1-01      | 12C    |    | 35.28 | 85.37      | 1.88 MultipleMeltPeaks |
| aadA-1-02      | 12C    |    |       |            | NoAmplification        |
| aadA1          | 12C    |    | 33.33 | 84.2       | 2.2                    |
| aadA2-01       | 12C    |    | 38.95 | 85.8       | 1.56 MultipleMeltPeaks |
| aadA2-02       | 12C    |    |       |            | NoAmplification        |
| aadA2-03       | 12C    |    |       |            | NoAmplification        |
| aadA5-01       | 12C    |    | 33.71 | 82.87      | 1.68 MultipleMeltPeaks |
| aadA5-02       | 12C    |    | 29.91 | 88.45      | 1.94                   |
| aadA9-01       | 12C    |    | 31.51 | 89.57      | 2.02 MultipleMeltPeaks |
| aadA9-02       | 12C    |    |       |            | NoAmplification        |
| aadD           | 12C    |    |       |            | NoAmplification        |
| aadE           | 12C    |    |       |            | NoAmplification        |
| acrA-01        | 12C    |    | 30.28 | 88.67      | 2.01                   |
| acrA-02        | 12C    |    | 34.94 | 87         | 1.83                   |
| acrA-03        | 12C    |    |       |            | NoAmplification        |
| acrA-04        | 12C    |    | 28.75 | 80.59      | 1.93                   |
| acrA-05        | 12C    |    | 30.06 | 88.62      | 1.89                   |
| acrB-01        | 12C    |    |       |            | NoAmplification        |
| acrF           | 12C    |    | 30.72 | 84.73      | 1.78                   |
| acrR-01        | 12C    |    | 32.49 | 80.89      | 1.9 MultipleMeltPeaks  |
| acrR-02        | 12C    |    |       |            | NoAmplification        |
| Actin          | 12C    |    |       |            | NoAmplification        |
| adeA           | 12C    |    |       |            | NoAmplification        |
| ampC-01        | 12C    |    | 30.5  | 85.1       | 2.07                   |
| ampC-02        | 12C    |    |       |            | NoAmplification        |
| ampC-04        | 12C    |    | 30.88 | 85.96      | 1.69                   |
| ampC-05        | 12C    |    |       |            | NoAmplification        |
| ampC-06        | 12C    |    | 36.66 | 87.91      | 1.84 MultipleMeltPeaks |
| ampC-07        | 12C    |    | 30.37 | 88.2       | 1.93                   |
| ampC-09        | 12C    |    |       |            | NoAmplification        |
| ampC/blaDH     | 12C    |    | 29.53 | 86.69      | 1.98                   |

|                          |     |       |       |      |                   |
|--------------------------|-----|-------|-------|------|-------------------|
| aph                      | 12C |       |       |      | NoAmplification   |
| aph(2')-Id-01            | 12C |       |       |      | NoAmplification   |
| aph(2')-Id-02            | 12C |       |       |      | NoAmplification   |
| aph6ia                   | 12C |       |       |      | NoAmplification   |
| aphA1(aka k <sub>a</sub> | 12C | 38.68 | 77.91 | 1.83 | MultipleMeltPeaks |
| bacA-01                  | 12C | 34.22 | 77.17 | 1.87 |                   |
| bacA-02                  | 12C | 31.09 | 89.21 | 1.97 |                   |
| BETA-globin              | 12C | 21.53 | 83.89 | 1.99 | MultipleMeltPeaks |
| bla-ACC-1                | 12C | 29.07 | 88.32 | 2.04 | MultipleMeltPeaks |
| bla-L1                   | 12C |       |       |      | NoAmplification   |
| bla1                     | 12C |       |       |      | NoAmplification   |
| blaCMY                   | 12C |       |       |      | NoAmplification   |
| blaCMY2-01               | 12C | 36.08 | 84.01 | 1.82 |                   |
| blaCMY2-02               | 12C | 27.61 | 89.29 | 1.98 |                   |
| blaCTX-M-01              | 12C |       |       |      | NoAmplification   |
| blaCTX-M-02              | 12C | 28.97 | 85.81 | 1.94 |                   |
| blaCTX-M-03              | 12C |       |       |      | NoAmplification   |
| blaCTX-M-04              | 12C | 34.16 | 85.01 | 1.89 | MultipleMeltPeaks |
| blaCTX-M-05              | 12C | 30.53 | 76.6  | 1.8  |                   |
| blaCTX-M-06              | 12C |       |       |      | NoAmplification   |
| blaGES                   | 12C |       |       |      | NoAmplification   |
| blaIMP-01                | 12C |       |       |      | NoAmplification   |
| blaIMP-02                | 12C |       |       |      | NoAmplification   |
| blaMOX/blaC              | 12C |       |       |      | NoAmplification   |
| blaOCH                   | 12C |       |       |      | NoAmplification   |
| blaOKP                   | 12C |       |       |      | NoAmplification   |
| blaOXA1/blaC             | 12C |       |       |      | NoAmplification   |
| blaOXA10-01              | 12C |       |       |      | NoAmplification   |
| blaOXA10-02              | 12C | 38.05 | 74.3  | 1.92 |                   |
| blaOXY                   | 12C | 36    | 88.76 | 1.64 | MultipleMeltPeaks |
| blaPAO                   | 12C | 35.47 | 77.69 | 1.87 |                   |
| blaPER                   | 12C |       |       |      | NoAmplification   |
| blaPSE                   | 12C |       |       |      | NoAmplification   |
| blaROB                   | 12C |       |       |      | NoAmplification   |
| blaSFO                   | 12C | 32.92 | 89.54 | 1.73 | MultipleMeltPeaks |
| blaSHV-01                | 12C |       |       |      | NoAmplification   |
| blaSHV-02                | 12C |       |       |      | NoAmplification   |
| blaTEM                   | 12C |       |       |      | NoAmplification   |
| blaTLA                   | 12C |       |       |      | NoAmplification   |
| blaVEB                   | 12C |       |       |      | NoAmplification   |
| blaVIM                   | 12C |       |       |      | NoAmplification   |
| blaZ                     | 12C |       |       |      | NoAmplification   |
| carB                     | 12C |       |       |      | NoAmplification   |
| catA1                    | 12C |       |       |      | NoAmplification   |
| catB3                    | 12C |       |       |      | NoAmplification   |
| catB8                    | 12C | 29.86 | 81.92 | 2.01 | MultipleMeltPeaks |

|            |     |       |       |      |                              |
|------------|-----|-------|-------|------|------------------------------|
| ceoA       | 12C | 29.02 | 82.37 | 1.99 |                              |
| cepA       | 12C |       |       |      | NoAmplification              |
| cfiA       | 12C | 29.03 | 86.62 | 1.94 |                              |
| cfr        | 12C |       |       |      | NoAmplification              |
| cfxA       | 12C | 35.34 | 79.45 | 1.9  |                              |
| cmeA       | 12C |       |       |      | NoAmplification              |
| cmlA1-01   | 12C |       |       |      | NoAmplification              |
| cmlA1-02   | 12C | 32.99 | 79.98 | 1.99 |                              |
| cmr        | 12C |       |       |      | NoAmplification              |
| cmx(A)     | 12C | 26.35 | 84.56 | 2.01 | MultipleMeltPeaks            |
| cphA-01    | 12C | 28.53 | 91.12 | 1.99 | MultipleMeltPeaks            |
| cphA-02    | 12C | 32.35 | 82.3  | 1.91 |                              |
| dfrA1      | 12C |       |       |      | NoAmplification              |
| dfrA12     | 12C | 35.07 | 90.54 | 1.7  | MultipleMeltPeaks            |
| emrD       | 12C | 35.97 | 84.22 | 1.82 |                              |
| ereA       | 12C | 33.91 | 83.19 | 1.89 |                              |
| ereB       | 12C | 32.2  | 88.61 | 1.74 |                              |
| erm(34)    | 12C |       |       |      | NoAmplification              |
| erm(35)    | 12C |       |       |      | NoAmplification              |
| erm(36)    | 12C | 35.98 | 87.64 | 1.7  |                              |
| ermA       | 12C |       |       |      | NoAmplification              |
| ermA/ermTR | 12C |       |       |      | NoAmplification              |
| ermB       | 12C |       |       |      | NoAmplification              |
| ermC       | 12C |       |       |      | NoAmplification              |
| ermF       | 12C |       |       |      | NoAmplification              |
| ermJ/ermD  | 12C |       |       |      | NoAmplification              |
| ermK-01    | 12C | 33.04 | 81.61 | 1.96 | MultipleMeltPeaks            |
| ermK-02    | 12C | 34.17 | 86.12 | 1.74 |                              |
| ermT-01    | 12C |       |       |      | NoAmplification              |
| ermT-02    | 12C |       |       |      | NoAmplification              |
| ermX       | 12C |       |       |      | NoAmplification              |
| ermY       | 12C |       |       |      | NoAmplification              |
| fabK       | 12C | 23.57 | 77.25 | 2.18 |                              |
| floR       | 12C |       |       |      | NoAmplification              |
| folA       | 12C | 34.54 | 81.83 | 1.85 |                              |
| fosB       | 12C |       |       |      | LowEfficiency, CtIsSmall, Ci |
| fosX       | 12C |       |       |      | NoAmplification              |
| fox5       | 12C | 23.93 | 86.41 | 2.02 | MultipleMeltPeaks            |
| imiR       | 12C |       |       |      | NoAmplification              |
| ImrA-01    | 12C |       |       |      | NoAmplification              |
| intl       | 12C | 29.82 | 84.87 | 1.92 | MultipleMeltPeaks            |
| intl1      | 12C | 18.48 | 87.51 | 1.94 |                              |
| IS613      | 12C | 30.95 | 79.24 | 1.89 |                              |
| lnuA-01    | 12C |       |       |      | NoAmplification              |
| lnuB-01    | 12C |       |       |      | NoAmplification              |
| lnuB-02    | 12C |       |       |      | NoAmplification              |

|                |     |       |       |      |                   |
|----------------|-----|-------|-------|------|-------------------|
| lnuC           | 12C | 32.98 | 87.26 | 1.83 |                   |
| marR-01        | 12C | 31.78 | 85.1  | 1.99 |                   |
| matA/mel       | 12C | 22.61 | 77.48 | 2.07 |                   |
| mdet1          | 12C |       |       |      | NoAmplification   |
| mdtA           | 12C | 34.08 | 82.1  | 1.74 |                   |
| mdtE/yhiU      | 12C |       |       |      | NoAmplification   |
| mecA           | 12C |       |       |      | NoAmplification   |
| mefA           | 12C | 22.07 | 80.27 | 2.01 | MultipleMeltPeaks |
| mepA           | 12C | 31.69 | 84.9  | 2.02 |                   |
| mexA           | 12C | 36.33 | 77.84 | 1.77 | MultipleMeltPeaks |
| mexD           | 12C | 30.71 | 80.04 | 2    | MultipleMeltPeaks |
| mexE           | 12C |       |       |      | NoAmplification   |
| mexF           | 12C | 27.48 | 87.21 | 2.03 | MultipleMeltPeaks |
| mphA-01        | 12C | 28.43 | 86.76 | 2.02 |                   |
| mphA-02        | 12C | 27.56 | 86.53 | 2.12 | MultipleMeltPeaks |
| mphB           | 12C | 37.72 | 79.28 | 1.63 |                   |
| mphC           | 12C | 35.3  | 80.65 | 1.82 | MultipleMeltPeaks |
| msrA-01        | 12C |       |       |      | NoAmplification   |
| msrC-01        | 12C |       |       |      | NoAmplification   |
| mtrC-01        | 12C |       |       |      | NoAmplification   |
| mtrC-02        | 12C | 35.44 | 84.25 | 1.85 |                   |
| mtrD-02        | 12C | 28.95 | 81.27 | 1.76 |                   |
| mtrD-03        | 12C | 36.15 | 84.19 | 1.73 | MultipleMeltPeaks |
| NDM1           | 12C | 37.84 | 83.18 | 1.68 |                   |
| nimE           | 12C | 34.15 | 76.01 | 1.93 |                   |
| nisB           | 12C |       |       |      | NoAmplification   |
| oleC           | 12C | 33.73 | 84.13 | 1.87 |                   |
| oprD           | 12C | 28.99 | 86.78 | 1.95 |                   |
| oprJ           | 12C |       |       |      | NoAmplification   |
| pbp            | 12C |       |       |      | NoAmplification   |
| pbp2x          | 12C | 22.99 | 76.14 | 2.01 |                   |
| Pbp5           | 12C |       |       |      | NoAmplification   |
| penA           | 12C | 34.55 | 87.43 | 1.81 |                   |
| pikR1          | 12C | 37.49 | 84.26 | 1.69 |                   |
| pikR2          | 12C | 30.28 | 85.13 | 1.52 |                   |
| pmrA           | 12C |       |       |      | NoAmplification   |
| pncA           | 12C | 31.28 | 85.72 | 1.98 | MultipleMeltPeaks |
| putative multi | 12C | 28.86 | 84.09 | 1.97 |                   |
| qac            | 12C | 39.1  | 83.56 | 1.71 | MultipleMeltPeaks |
| qacA           | 12C | 35.86 | 70.46 | 1.89 |                   |
| qacA/qacB      | 12C |       |       |      | NoAmplification   |
| qacEdelta1-0   | 12C |       |       |      | NoAmplification   |
| qacEdelta1-0   | 12C | 35.41 | 85.29 | 1.92 |                   |
| qacH-01        | 12C | 29.9  | 86.09 | 1.98 | MultipleMeltPeaks |
| qacH-02        | 12C | 33.44 | 83.96 | 1.66 |                   |
| qnrA           | 12C |       |       |      | NoAmplification   |



|              |     |       |       |      |                   |
|--------------|-----|-------|-------|------|-------------------|
| rarD-02      | 12C | 34.9  | 80.31 | 1.93 | MultipleMeltPeaks |
| sat4         | 12C |       |       |      | NoAmplification   |
| sdeB         | 12C |       |       |      | NoAmplification   |
| spcN-01      | 12C | 34.68 | 83.94 | 1.96 |                   |
| speA         | 12C |       |       |      | NoAmplification   |
| str          | 12C |       |       |      | NoAmplification   |
| strA         | 12C |       |       |      | NoAmplification   |
| strB         | 12C | 34.13 | 82.85 | 1.92 |                   |
| sul1         | 12C | 30.85 | 89.65 | 1.91 |                   |
| sul2         | 12C |       |       |      | NoAmplification   |
| sulA/foIP-01 | 12C | 24.51 | 80.45 | 1.95 |                   |
| sulA/foIP-03 | 12C | 22.89 | 83.12 | 1.97 |                   |
| tet(32)      | 12C |       |       |      | NoAmplification   |
| tet(34)      | 12C | 30.91 | 75.43 | 1.91 |                   |
| tet(35)      | 12C |       |       |      | NoAmplification   |
| tet(36)-A    | 12C |       |       |      | NoAmplification   |
| tet(36)-B    | 12C |       |       |      | NoAmplification   |
| tet(37)      | 12C | 31.41 | 88.59 | 1.96 |                   |
| tetA-01      | 12C | 29.77 | 85.1  | 1.85 |                   |
| tetA-02      | 12C |       |       |      | CurveFitFailed    |
| tetB-01      | 12C | 29.64 | 87.27 | 2    |                   |
| tetB-02      | 12C | 37.7  | 76.44 | 1.7  |                   |
| tetC-01      | 12C |       |       |      | NoAmplification   |
| tetC-02      | 12C |       |       |      | NoAmplification   |
| tetD-01      | 12C |       |       |      | NoAmplification   |
| tetD-02      | 12C | 35.86 | 76.42 | 1.99 |                   |
| tetE         | 12C |       |       |      | NoAmplification   |
| tetG-01      | 12C | 32.46 | 82.82 | 1.91 |                   |
| tetG-02      | 12C | 35.33 | 83.79 | 1.83 | MultipleMeltPeaks |
| tetH         | 12C |       |       |      | NoAmplification   |
| tetJ         | 12C |       |       |      | NoAmplification   |
| tetK         | 12C |       |       |      | NoAmplification   |
| tetL-01      | 12C | 34.77 | 80.89 | 1.82 |                   |
| tetL-02      | 12C | 34.86 | 85.19 | 1.7  |                   |
| tetM-01      | 12C | 26.54 | 75.82 | 1.92 | MultipleMeltPeaks |
| tetM-02      | 12C | 26.49 | 77.31 | 2    |                   |
| tetO-01      | 12C | 26.14 | 76.79 | 2.04 |                   |
| tetPA        | 12C |       |       |      | NoAmplification   |
| tetPB-01     | 12C |       |       |      | NoAmplification   |
| tetPB-02     | 12C | 26.34 | 84.76 | 2.07 |                   |
| tetPB-03     | 12C |       |       |      | NoAmplification   |
| tetPB-05     | 12C |       |       |      | NoAmplification   |
| tetQ         | 12C | 29.31 | 76.43 | 1.97 |                   |
| tetR-02      | 12C | 29.57 | 89.23 | 1.78 |                   |
| tetR-03      | 12C |       |       |      | NoAmplification   |
| tetS         | 12C |       |       |      | NoAmplification   |

|             |     |       |       |      |                              |
|-------------|-----|-------|-------|------|------------------------------|
| tetT        | 12C |       |       |      | NoAmplification              |
| tetU-01     | 12C |       |       |      | NoAmplification              |
| tetV        | 12C |       |       |      | NoAmplification              |
| tetW-01     | 12C | 29.12 | 81.49 | 1.98 |                              |
| tetX        | 12C |       |       |      | BadR2, HighEfficiency, Ctls' |
| tnpA-01     | 12C |       |       |      | NoAmplification              |
| tnpA-02     | 12C | 33.49 | 84.54 | 1.82 | MultipleMeltPeaks            |
| tnpA-03     | 12C |       |       |      | NoAmplification              |
| tnpA-04     | 12C |       |       |      | NoAmplification              |
| tnpA-05     | 12C |       |       |      | NoAmplification              |
| tnpA-07     | 12C |       |       |      | NoAmplification              |
| tolC-01     | 12C | 34.96 | 83.59 | 1.79 |                              |
| tolC-02     | 12C | 28.76 | 87.62 | 2    | MultipleMeltPeaks            |
| tolC-03     | 12C | 30.09 | 85.6  | 2.04 |                              |
| Tp614       | 12C | 30.16 | 78.66 | 1.96 | MultipleMeltPeaks            |
| ttgA        | 12C |       |       |      | NoAmplification              |
| ttgB        | 12C | 36.81 | 88.45 | 1.71 |                              |
| vanA        | 12C |       |       |      | NoAmplification              |
| vanB-01     | 12C | 30.64 | 83.3  | 1.92 |                              |
| vanC-01     | 12C |       |       |      | CurveFitFailed               |
| vanC-02     | 12C |       |       |      | NoAmplification              |
| vanC-03     | 12C | 23.04 | 85.93 | 1.95 | MultipleMeltPeaks            |
| vanC1       | 12C |       |       |      | NoAmplification              |
| vanC2/vanC3 | 12C | 28.36 | 84.63 | 2.12 | MultipleMeltPeaks            |
| vanG        | 12C |       |       |      | NoAmplification              |
| vanHB       | 12C |       |       |      | NoAmplification              |
| vanHD       | 12C | 34.89 | 75.01 | 1.83 | MultipleMeltPeaks            |
| vanRA-01    | 12C |       |       |      | NoAmplification              |
| vanRA-02    | 12C |       |       |      | NoAmplification              |
| vanRB       | 12C | 33.27 | 80.71 | 1.63 | MultipleMeltPeaks            |
| vanRC       | 12C |       |       |      | NoAmplification              |
| vanRC4      | 12C |       |       |      | NoAmplification              |
| vanRD       | 12C |       |       |      | NoAmplification              |
| vanSA       | 12C |       |       |      | NoAmplification              |
| vanSB       | 12C | 27.53 | 74.84 | 2.01 |                              |
| vanSC-01    | 12C | 30.12 | 77.29 | 1.89 | MultipleMeltPeaks            |
| vanSC-02    | 12C |       |       |      | NoAmplification              |
| vanTC-01    | 12C |       |       |      | NoAmplification              |
| vanTC-02    | 12C | 33.32 | 88.24 | 1.93 |                              |
| vanTE       | 12C | 38.76 | 77.95 | 1.54 | MultipleMeltPeaks            |
| vanTG       | 12C |       |       |      | NoAmplification              |
| vanWB       | 12C |       |       |      | NoAmplification              |
| vanWG       | 12C | 36.87 | 74.11 | 1.83 |                              |
| vanXA       | 12C |       |       |      | NoAmplification              |
| vanXB       | 12C |       |       |      | NoAmplification              |
| vanXD       | 12C | 28.04 | 75.65 | 2.08 |                              |

|              |     |       |       |      |                   |
|--------------|-----|-------|-------|------|-------------------|
| vanYB        | 12C | 32.08 | 85.1  | 1.97 | MultipleMeltPeaks |
| vanYD-01     | 12C | 28.68 | 82.34 | 1.77 | MultipleMeltPeaks |
| vanYD-02     | 12C | 36.04 | 88.46 | 1.79 |                   |
| vatB-01      | 12C |       |       |      | NoAmplification   |
| vatB-02      | 12C |       |       |      | NoAmplification   |
| vatC-01      | 12C | 32.92 | 81.25 | 1.86 |                   |
| vatC-02      | 12C | 35.67 | 86.91 | 1.81 |                   |
| vatE-01      | 12C | 28.37 | 77.26 | 2    |                   |
| vatE-02      | 12C |       |       |      | NoAmplification   |
| vgaA-01      | 12C |       |       |      | NoAmplification   |
| vgaA-02      | 12C |       |       |      | NoAmplification   |
| vgb-01       | 12C | 39.01 | 79.33 | 1.71 | MultipleMeltPeaks |
| vgbB-01      | 12C | 36.51 | 86.51 | 1.67 |                   |
| vgbB-02      | 12C |       |       |      | NoAmplification   |
| yceE/mdtG-0  | 12C | 32.1  | 77.48 | 2.15 |                   |
| yceE/mdtG-0  | 12C | 33.61 | 81.29 | 2    |                   |
| yceL/mdtH-0  | 12C | 30.93 | 85.66 | 1.97 | MultipleMeltPeaks |
| yceL/mdtH-0  | 12C |       |       |      | NoAmplification   |
| yceL/mdtH-0  | 12C | 36.9  | 86.01 | 1.75 | MultipleMeltPeaks |
| yidY/mdtL-01 | 12C | 29.31 | 83.27 | 2    |                   |
| yidY/mdtL-02 | 12C |       |       |      | NoAmplification   |































| Assay          | Sample | Ct | Tm    | Efficiency | flag                         |
|----------------|--------|----|-------|------------|------------------------------|
| 16S rRNA       | 13A    |    | 16.51 | 80.93      | 2.09                         |
| aac            | 13A    |    | 28.54 | 86.54      | 1.4 MultipleMeltPeaks        |
| aac(6')-Ib(akz | 13A    |    |       |            | NoAmplification              |
| aac(6')-Ib(akz | 13A    |    | 32.28 | 81.63      | 1.88 MultipleMeltPeaks       |
| aac(6')-Ib(akz | 13A    |    | 31.01 | 89.96      | 2.08                         |
| aac(6')-II     | 13A    |    |       |            | NoAmplification              |
| aac(6')I1      | 13A    |    |       |            | NoAmplification              |
| aacA/aphD      | 13A    |    |       |            | NoAmplification              |
| aacC           | 13A    |    | 32.25 | 85.3       | 1.78                         |
| aacC1          | 13A    |    |       |            | NoAmplification              |
| aacC2          | 13A    |    |       |            | NoAmplification              |
| aacC4          | 13A    |    |       |            | NoAmplification              |
| aadA-01        | 13A    |    |       |            | NoAmplification              |
| aadA-02        | 13A    |    |       |            | NoAmplification              |
| aadA-1-01      | 13A    |    |       |            | CurveFitFailed               |
| aadA-1-02      | 13A    |    |       |            | NoAmplification              |
| aadA1          | 13A    |    | 41.02 | 82.3       | 1.78                         |
| aadA2-01       | 13A    |    | 39.59 | 89.07      | 1.5                          |
| aadA2-02       | 13A    |    |       |            | NoAmplification              |
| aadA2-03       | 13A    |    |       |            | NoAmplification              |
| aadA5-01       | 13A    |    |       |            | CurveFitFailed               |
| aadA5-02       | 13A    |    | 32.42 | 88.36      | 1.61 MultipleMeltPeaks       |
| aadA9-01       | 13A    |    | 31.4  | 89.39      | 1.97 MultipleMeltPeaks       |
| aadA9-02       | 13A    |    |       |            | NoAmplification              |
| aadD           | 13A    |    |       |            | NoAmplification              |
| aadE           | 13A    |    |       |            | NoAmplification              |
| acrA-01        | 13A    |    | 32.57 | 88.65      | 1.87                         |
| acrA-02        | 13A    |    |       |            | CtIsSmall, CurveFitFailed, F |
| acrA-03        | 13A    |    | 36.24 | 79.95      | 1.84                         |
| acrA-04        | 13A    |    | 30.64 | 80.55      | 1.98                         |
| acrA-05        | 13A    |    | 30.16 | 88.6       | 1.93                         |
| acrB-01        | 13A    |    |       |            | NoAmplification              |
| acrF           | 13A    |    | 31.17 | 82.3       | 1.73                         |
| acrR-01        | 13A    |    |       |            | CurveFitFailed               |
| acrR-02        | 13A    |    | 37.48 | 85.03      | 1.67 MultipleMeltPeaks       |
| Actin          | 13A    |    | 19.33 | 87.07      | 1.88                         |
| adeA           | 13A    |    |       |            | CurveFitFailed               |
| ampC-01        | 13A    |    | 33.92 | 85.3       | 1.85                         |
| ampC-02        | 13A    |    |       |            | NoAmplification              |
| ampC-04        | 13A    |    | 33.6  | 78.22      | 1.89                         |
| ampC-05        | 13A    |    |       |            | NoAmplification              |
| ampC-06        | 13A    |    | 36.12 | 87.74      | 1.83                         |
| ampC-07        | 13A    |    | 35.67 | 88.13      | 1.83                         |
| ampC-09        | 13A    |    |       |            | NoAmplification              |
| ampC/blaDH     | 13A    |    | 31.17 | 85.25      | 1.92 MultipleMeltPeaks       |

|                            |     |       |       |      |                                          |
|----------------------------|-----|-------|-------|------|------------------------------------------|
| aph                        | 13A |       |       |      | NoAmplification                          |
| aph(2')-Id-01              | 13A |       |       |      | NoAmplification                          |
| aph(2')-Id-02              | 13A |       |       |      | NoAmplification                          |
| aph6ia                     | 13A |       |       |      | NoAmplification                          |
| aphA1(aka k <sub>z</sub> ) | 13A |       |       |      | NoAmplification                          |
| bacA-01                    | 13A |       |       |      | NoAmplification                          |
| bacA-02                    | 13A | 33.99 | 86.73 | 1.83 | MultipleMeltPeaks                        |
| BETA-globin                | 13A | 20.34 | 84.01 | 1.92 | MultipleMeltPeaks                        |
| bla-ACC-1                  | 13A | 35.45 | 86.49 | 1.86 |                                          |
| bla-L1                     | 13A | 29.72 | 84.26 | 1.94 |                                          |
| bla1                       | 13A |       |       |      | NoAmplification                          |
| blaCMY                     | 13A |       |       |      | LowEfficiency, CtIsSmall, S <sub>e</sub> |
| blaCMY2-01                 | 13A |       |       |      | CurveFitFailed                           |
| blaCMY2-02                 | 13A | 30.01 | 84.74 | 1.82 | MultipleMeltPeaks                        |
| blaCTX-M-01                | 13A |       |       |      | NoAmplification                          |
| blaCTX-M-02                | 13A | 40.51 | 80.21 | 1.53 | MultipleMeltPeaks                        |
| blaCTX-M-03                | 13A |       |       |      | NoAmplification                          |
| blaCTX-M-04                | 13A | 39.37 | 75.84 | 1.81 |                                          |
| blaCTX-M-05                | 13A | 31.71 | 76.31 | 1.87 |                                          |
| blaCTX-M-06                | 13A |       |       |      | CurveFitFailed                           |
| blaGES                     | 13A |       |       |      | NoAmplification                          |
| blaIMP-01                  | 13A |       |       |      | NoAmplification                          |
| blaIMP-02                  | 13A |       |       |      | NoAmplification                          |
| blaMOX/blaC                | 13A | 33.69 | 81.65 | 1.84 |                                          |
| blaOCH                     | 13A |       |       |      | NoAmplification                          |
| blaOKP                     | 13A |       |       |      | NoAmplification                          |
| blaOXA1/blaC               | 13A |       |       |      | NoAmplification                          |
| blaOXA10-01                | 13A |       |       |      | NoAmplification                          |
| blaOXA10-02                | 13A |       |       |      | NoAmplification                          |
| blaOXY                     | 13A |       |       |      | NoAmplification                          |
| blaPAO                     | 13A |       |       |      | NoAmplification                          |
| blaPER                     | 13A |       |       |      | NoAmplification                          |
| blaPSE                     | 13A |       |       |      | NoAmplification                          |
| blaROB                     | 13A |       |       |      | NoAmplification                          |
| blaSFO                     | 13A |       |       |      | CurveFitFailed                           |
| blaSHV-01                  | 13A | 33.01 | 86.7  | 1.7  |                                          |
| blaSHV-02                  | 13A | 34.53 | 80.77 | 1.94 |                                          |
| blaTEM                     | 13A | 33.69 | 81.59 | 1.8  |                                          |
| blaTLA                     | 13A |       |       |      | NoAmplification                          |
| blaVEB                     | 13A |       |       |      | NoAmplification                          |
| blaVIM                     | 13A |       |       |      | NoAmplification                          |
| blaZ                       | 13A |       |       |      | NoAmplification                          |
| carB                       | 13A | 34.41 | 81.5  | 1.78 |                                          |
| catA1                      | 13A |       |       |      | NoAmplification                          |
| catB3                      | 13A | 33.18 | 87.51 | 2.05 |                                          |
| catB8                      | 13A | 31.79 | 81.8  | 2.03 |                                          |

|            |     |       |       |      |                              |
|------------|-----|-------|-------|------|------------------------------|
| ceoA       | 13A | 29.74 | 82.12 | 2.01 | MultipleMeltPeaks            |
| cepA       | 13A |       |       |      | NoAmplification              |
| cfiA       | 13A | 28.89 | 86.32 | 1.92 |                              |
| cfr        | 13A |       |       |      | NoAmplification              |
| cfxA       | 13A |       |       |      | NoAmplification              |
| cmeA       | 13A |       |       |      | NoAmplification              |
| cmlA1-01   | 13A |       |       |      | NoAmplification              |
| cmlA1-02   | 13A |       |       |      | NoAmplification              |
| cmr        | 13A |       |       |      | NoAmplification              |
| cmx(A)     | 13A | 29.96 | 87.63 | 1.64 |                              |
| cphA-01    | 13A | 30.67 | 86.31 | 1.79 |                              |
| cphA-02    | 13A |       |       |      | NoAmplification              |
| dfrA1      | 13A | 38.49 | 82.76 | 2.05 | BadR2                        |
| dfrA12     | 13A | 36.56 | 83.17 | 1.66 | MultipleMeltPeaks            |
| emrD       | 13A |       |       |      | NoAmplification              |
| ereA       | 13A |       |       |      | NoAmplification              |
| ereB       | 13A | 34.97 | 88.38 | 1.9  |                              |
| erm(34)    | 13A |       |       |      | NoAmplification              |
| erm(35)    | 13A |       |       |      | CurveFitFailed               |
| erm(36)    | 13A |       |       |      | NoAmplification              |
| ermA       | 13A |       |       |      | NoAmplification              |
| ermA/ermTR | 13A |       |       |      | NoAmplification              |
| ermB       | 13A |       |       |      | NoAmplification              |
| ermC       | 13A |       |       |      | NoAmplification              |
| ermF       | 13A |       |       |      | NoAmplification              |
| ermJ/ermD  | 13A |       |       |      | CurveFitFailed               |
| ermK-01    | 13A | 36.49 | 74.72 | 1.87 | MultipleMeltPeaks            |
| ermK-02    | 13A | 32.96 | 76.02 | 1.68 | MultipleMeltPeaks            |
| ermT-01    | 13A |       |       |      | NoAmplification              |
| ermT-02    | 13A |       |       |      | CtIsSmall, CurveFitFailed, F |
| ermX       | 13A |       |       |      | NoAmplification              |
| ermY       | 13A |       |       |      | NoAmplification              |
| fabK       | 13A | 29.32 | 79.44 | 1.51 |                              |
| floR       | 13A |       |       |      | NoAmplification              |
| folA       | 13A |       |       |      | NoAmplification              |
| fosB       | 13A |       |       |      | LowEfficiency, CtIsSmall, S: |
| fosX       | 13A |       |       |      | NoAmplification              |
| fox5       | 13A | 26.63 | 86.16 | 1.75 |                              |
| imiR       | 13A |       |       |      | NoAmplification              |
| ImrA-01    | 13A | 32.05 | 82.69 | 2    |                              |
| intl       | 13A | 29.78 | 84.69 | 1.75 |                              |
| intl1      | 13A | 19.63 | 87.41 | 1.93 |                              |
| IS613      | 13A | 30.15 | 79.6  | 1.73 |                              |
| lnuA-01    | 13A |       |       |      | NoAmplification              |
| lnuB-01    | 13A |       |       |      | NoAmplification              |
| lnuB-02    | 13A |       |       |      | NoAmplification              |

|                |     |       |       |      |                              |
|----------------|-----|-------|-------|------|------------------------------|
| lnuC           | 13A | 35.21 | 85.13 | 1.76 |                              |
| marR-01        | 13A |       |       |      | CurveFitFailed               |
| matA/mel       | 13A | 27.46 | 76.92 | 2.03 | MultipleMeltPeaks            |
| mdet1          | 13A |       |       |      | NoAmplification              |
| mdtA           | 13A | 40.92 | 83.72 | 1.55 | MultipleMeltPeaks            |
| mdtE/yhiU      | 13A |       |       |      | NoAmplification              |
| mecA           | 13A |       |       |      | NoAmplification              |
| mefA           | 13A | 25.79 | 80.39 | 1.99 |                              |
| mepA           | 13A | 35.45 | 84.81 | 1.77 |                              |
| mexA           | 13A | 36.37 | 78.19 | 1.8  |                              |
| mexD           | 13A | 35.09 | 79.76 | 2.07 |                              |
| mexE           | 13A |       |       |      | NoAmplification              |
| mexF           | 13A | 32.97 | 87.24 | 1.79 | MultipleMeltPeaks            |
| mphA-01        | 13A | 29.37 | 86.85 | 1.82 |                              |
| mphA-02        | 13A |       |       |      | LowEfficiency, CurveFitFail  |
| mphB           | 13A |       |       |      | CtIsSmall, CurveFitFailed, F |
| mphC           | 13A |       |       |      | NoAmplification              |
| msrA-01        | 13A |       |       |      | LowEfficiency, CtIsSmall, Ci |
| msrC-01        | 13A |       |       |      | NoAmplification              |
| mtrC-01        | 13A |       |       |      | NoAmplification              |
| mtrC-02        | 13A | 34.18 | 76.61 | 1.97 | MultipleMeltPeaks            |
| mtrD-02        | 13A | 27.35 | 81.27 | 1.8  |                              |
| mtrD-03        | 13A |       |       |      | NoAmplification              |
| NDM1           | 13A |       |       |      | NoAmplification              |
| nimE           | 13A | 33.03 | 85    | 1.73 |                              |
| nisB           | 13A |       |       |      | NoAmplification              |
| oleC           | 13A |       |       |      | NoAmplification              |
| oprD           | 13A | 28.71 | 81.7  | 1.99 | MultipleMeltPeaks            |
| oprJ           | 13A |       |       |      | NoAmplification              |
| pbp            | 13A |       |       |      | NoAmplification              |
| pbp2x          | 13A |       |       |      | NoAmplification              |
| Pbp5           | 13A |       |       |      | NoAmplification              |
| penA           | 13A |       |       |      | NoAmplification              |
| pikR1          | 13A |       |       |      | NoAmplification              |
| pikR2          | 13A | 31.48 | 85.49 | 1.56 |                              |
| pmrA           | 13A | 31.14 | 78.46 | 1.9  |                              |
| pncA           | 13A | 34.54 | 76.91 | 1.96 | MultipleMeltPeaks            |
| putative multi | 13A | 30.87 | 84.06 | 2.04 |                              |
| qac            | 13A |       |       |      | NoAmplification              |
| qacA           | 13A | 32.7  | 70.08 | 1.61 | MultipleMeltPeaks            |
| qacA/qacB      | 13A |       |       |      | NoAmplification              |
| qacEdelta1-0   | 13A |       |       |      | NoAmplification              |
| qacEdelta1-0   | 13A | 36.67 | 74.63 | 1.77 | MultipleMeltPeaks            |
| qacH-01        | 13A | 33.48 | 86.41 | 1.93 |                              |
| qacH-02        | 13A | 34.19 | 83.67 | 1.65 | MultipleMeltPeaks            |
| qnrA           | 13A | 34.59 | 79.89 | 1.85 |                              |

|              |     |       |       |      |                              |
|--------------|-----|-------|-------|------|------------------------------|
| rarD-02      | 13A | 40.91 | 85.95 | 1.63 |                              |
| sat4         | 13A |       |       |      | LowEfficiency, CtIsSmall, Ci |
| sdeB         | 13A |       |       |      | CurveFitFailed               |
| spcN-01      | 13A | 42.02 | 85.94 | 1.76 | MultipleMeltPeaks            |
| speA         | 13A |       |       |      | NoAmplification              |
| str          | 13A |       |       |      | NoAmplification              |
| strA         | 13A |       |       |      | NoAmplification              |
| strB         | 13A |       |       |      | NoAmplification              |
| sul1         | 13A | 31.84 | 90.77 | 1.86 |                              |
| sul2         | 13A |       |       |      | NoAmplification              |
| sulA/foIP-01 | 13A |       |       |      | NoAmplification              |
| sulA/foIP-03 | 13A | 29.64 | 83.65 | 1.9  |                              |
| tet(32)      | 13A |       |       |      | NoAmplification              |
| tet(34)      | 13A | 30.22 | 75.81 | 2.02 |                              |
| tet(35)      | 13A | 33.46 | 83.77 | 1.88 | MultipleMeltPeaks            |
| tet(36)-A    | 13A |       |       |      | NoAmplification              |
| tet(36)-B    | 13A |       |       |      | NoAmplification              |
| tet(37)      | 13A | 28.79 | 75.35 | 1.93 |                              |
| tetA-01      | 13A | 30.9  | 85.06 | 1.97 |                              |
| tetA-02      | 13A |       |       |      | LowEfficiency, CtIsSmall, Ci |
| tetB-01      | 13A | 34.12 | 86.36 | 1.92 | MultipleMeltPeaks            |
| tetB-02      | 13A |       |       |      | CtIsSmall, CurveFitFailed, F |
| tetC-01      | 13A |       |       |      | NoAmplification              |
| tetC-02      | 13A |       |       |      | NoAmplification              |
| tetD-01      | 13A |       |       |      | NoAmplification              |
| tetD-02      | 13A |       |       |      | CtIsSmall, SaturationBaseli  |
| tetE         | 13A |       |       |      | NoAmplification              |
| tetG-01      | 13A | 32.6  | 82.32 | 2.23 |                              |
| tetG-02      | 13A | 36.13 | 87.89 | 1.73 | MultipleMeltPeaks            |
| tetH         | 13A |       |       |      | NoAmplification              |
| tetJ         | 13A |       |       |      | LowEfficiency, CtIsSmall, Ci |
| tetK         | 13A |       |       |      | NoAmplification              |
| tetL-01      | 13A |       |       |      | NoAmplification              |
| tetL-02      | 13A | 34.61 | 85.21 | 1.77 |                              |
| tetM-01      | 13A | 33.05 | 77.99 | 2.04 |                              |
| tetM-02      | 13A | 29.09 | 77.25 | 2    |                              |
| tetO-01      | 13A |       |       |      | NoAmplification              |
| tetPA        | 13A |       |       |      | NoAmplification              |
| tetPB-01     | 13A |       |       |      | NoAmplification              |
| tetPB-02     | 13A | 26.85 | 84.79 | 2.09 |                              |
| tetPB-03     | 13A |       |       |      | NoAmplification              |
| tetPB-05     | 13A |       |       |      | NoAmplification              |
| tetQ         | 13A |       |       |      | NoAmplification              |
| tetR-02      | 13A | 33.08 | 87.18 | 1.64 | MultipleMeltPeaks            |
| tetR-03      | 13A |       |       |      | NoAmplification              |
| tetS         | 13A | 32.34 | 85.22 | 1.73 |                              |

|             |     |       |       |      |                              |
|-------------|-----|-------|-------|------|------------------------------|
| tetT        | 13A | 37.38 | 71.78 | 1.97 |                              |
| tetU-01     | 13A |       |       |      | NoAmplification              |
| tetV        | 13A |       |       |      | NoAmplification              |
| tetW-01     | 13A |       |       |      | NoAmplification              |
| tetX        | 13A |       |       |      | NoAmplification              |
| tnpA-01     | 13A |       |       |      | NoAmplification              |
| tnpA-02     | 13A |       |       |      | NoAmplification              |
| tnpA-03     | 13A | 34.89 | 74.31 | 2.02 |                              |
| tnpA-04     | 13A |       |       |      | NoAmplification              |
| tnpA-05     | 13A |       |       |      | NoAmplification              |
| tnpA-07     | 13A |       |       |      | NoAmplification              |
| tolC-01     | 13A | 35.22 | 87.15 | 1.83 |                              |
| tolC-02     | 13A | 28.97 | 87.65 | 2.01 |                              |
| tolC-03     | 13A | 29.22 | 86.26 | 2.02 |                              |
| Tp614       | 13A |       |       |      | NoAmplification              |
| ttgA        | 13A | 34.9  | 87.41 | 1.84 |                              |
| ttgB        | 13A |       |       |      | CurveFitFailed               |
| vanA        | 13A |       |       |      | NoAmplification              |
| vanB-01     | 13A | 34.44 | 84.02 | 1.84 | MultipleMeltPeaks            |
| vanC-01     | 13A |       |       |      | LowEfficiency, CtIsSmall, Ci |
| vanC-02     | 13A |       |       |      | NoAmplification              |
| vanC-03     | 13A | 23.52 | 86.08 | 2.06 |                              |
| vanC1       | 13A |       |       |      | NoAmplification              |
| vanC2/vanC3 | 13A | 30.87 | 84.69 | 1.75 |                              |
| vanG        | 13A |       |       |      | NoAmplification              |
| vanHB       | 13A | 44.19 | 78.5  | 2.07 | BadR2                        |
| vanHD       | 13A | 35.15 | 82.82 | 1.87 |                              |
| vanRA-01    | 13A |       |       |      | NoAmplification              |
| vanRA-02    | 13A |       |       |      | NoAmplification              |
| vanRB       | 13A | 31.8  | 85.52 | 1.54 |                              |
| vanRC       | 13A |       |       |      | NoAmplification              |
| vanRC4      | 13A |       |       |      | NoAmplification              |
| vanRD       | 13A |       |       |      | BadR2, CtIsSmall, Saturatio  |
| vanSA       | 13A |       |       |      | NoAmplification              |
| vanSB       | 13A | 27.66 | 74.69 | 2.03 |                              |
| vanSC-01    | 13A | 33.79 | 83.98 | 1.79 |                              |
| vanSC-02    | 13A |       |       |      | NoAmplification              |
| vanTC-01    | 13A |       |       |      | NoAmplification              |
| vanTC-02    | 13A |       |       |      | CtIsLarge, CurveFitFailed    |
| vanTE       | 13A | 36.52 | 84.1  | 1.7  | MultipleMeltPeaks            |
| vanTG       | 13A |       |       |      | BadR2, CtIsSmall, Saturatio  |
| vanWB       | 13A |       |       |      | NoAmplification              |
| vanWG       | 13A |       |       |      | NoAmplification              |
| vanXA       | 13A |       |       |      | NoAmplification              |
| vanXB       | 13A |       |       |      | NoAmplification              |
| vanXD       | 13A | 29.29 | 75.27 | 2.11 |                              |

|              |     |       |       |      |                              |
|--------------|-----|-------|-------|------|------------------------------|
| vanYB        | 13A | 34.27 | 84.55 | 1.93 |                              |
| vanYD-01     | 13A | 29.08 | 82.7  | 1.74 |                              |
| vanYD-02     | 13A |       |       |      | CurveFitFailed               |
| vatB-01      | 13A |       |       |      | LowEfficiency, CtIsSmall, S: |
| vatB-02      | 13A |       |       |      | LowEfficiency, CtIsSmall, C  |
| vatC-01      | 13A | 33.81 | 81.24 | 1.92 |                              |
| vatC-02      | 13A | 32.55 | 87.52 | 1.93 |                              |
| vatE-01      | 13A | 30.44 | 77.16 | 1.99 |                              |
| vatE-02      | 13A |       |       |      | NoAmplification              |
| vgaA-01      | 13A |       |       |      | NoAmplification              |
| vgaA-02      | 13A |       |       |      | NoAmplification              |
| vgb-01       | 13A | 37    | 84.01 | 1.75 | MultipleMeltPeaks            |
| vgbB-01      | 13A |       |       |      | NoAmplification              |
| vgbB-02      | 13A |       |       |      | CurveFitFailed               |
| yceE/mdtG-0  | 13A | 35.74 | 83.8  | 2.04 |                              |
| yceE/mdtG-0  | 13A |       |       |      | CtIsSmall, SaturationBaseli  |
| yceL/mdtH-0  | 13A | 32.58 | 83.95 | 1.89 |                              |
| yceL/mdtH-0  | 13A |       |       |      | NoAmplification              |
| yceL/mdtH-0  | 13A | 34.17 | 81.35 | 1.96 |                              |
| yidY/mdtL-01 | 13A | 38.96 | 82.41 | 1.58 | MultipleMeltPeaks            |
| yidY/mdtL-02 | 13A |       |       |      | NoAmplification              |































| Assay          | Sample | Ct    | Tm    | Efficiency | flag                             |
|----------------|--------|-------|-------|------------|----------------------------------|
| 16S rRNA       | 13B    |       | 19.24 | 81.09      | 1.96                             |
| aac            | 13B    |       | 29.57 | 84.6       | 1.84 CtIsLarge, SaturationBaseli |
| aac(6')-Ib(akz | 13B    |       |       |            | LowEfficiency, CtIsSmall, Ci     |
| aac(6')-Ib(akz | 13B    | 29.8  | 86.93 | 1.97       | CtIsLarge                        |
| aac(6')-Ib(akz | 13B    | 31.18 | 79.11 | 1.99       | CtIsLarge, MultipleMeltPez       |
| aac(6')-II     | 13B    | 32.7  | 83.53 | 1.96       | CtIsLarge                        |
| aac(6')I1      | 13B    |       |       |            | BadR2, LowEfficiency, CtIsl      |
| aacA/aphD      | 13B    |       |       |            | LowEfficiency, CtIsSmall, S;     |
| aacC           | 13B    | 32.24 | 85.3  | 1.84       | CtIsLarge, MultipleMeltPez       |
| aacC1          | 13B    |       |       |            | NoAmplification                  |
| aacC2          | 13B    |       |       |            | NoAmplification                  |
| aacC4          | 13B    |       |       |            | NoAmplification                  |
| aadA-01        | 13B    |       |       |            | NoAmplification                  |
| aadA-02        | 13B    |       |       |            | NoAmplification                  |
| aadA-1-01      | 13B    |       |       |            | CtIsLarge, SaturationBaseli      |
| aadA-1-02      | 13B    |       |       |            | LowEfficiency, CtIsSmall, Ci     |
| aadA1          | 13B    |       |       |            | CtIsLarge, CurveFitFailed        |
| aadA2-01       | 13B    |       |       |            | LowEfficiency, CtIsSmall, S;     |
| aadA2-02       | 13B    | 33.76 | 74.85 | 1.91       | CtIsLarge, SaturationBaseli      |
| aadA2-03       | 13B    |       |       |            | NoAmplification                  |
| aadA5-01       | 13B    |       |       |            | CtIsLarge, CurveFitFailed        |
| aadA5-02       | 13B    | 33.18 | 83.52 | 1.97       | CtIsLarge                        |
| aadA9-01       | 13B    |       |       |            | CtIsLarge, CurveFitFailed        |
| aadA9-02       | 13B    |       |       |            | CtIsLarge, CurveFitFailed        |
| aadD           | 13B    |       |       |            | NoAmplification                  |
| aadE           | 13B    |       |       |            | NoAmplification                  |
| acrA-01        | 13B    | 32.25 | 88.63 | 1.99       | CtIsLarge                        |
| acrA-02        | 13B    |       |       |            | CtIsLarge, CurveFitFailed        |
| acrA-03        | 13B    |       |       |            | LowEfficiency, CtIsSmall, Ci     |
| acrA-04        | 13B    | 29.54 | 80.54 | 1.97       | CtIsLarge                        |
| acrA-05        | 13B    | 29.89 | 88.5  | 1.95       | CtIsLarge                        |
| acrB-01        | 13B    |       |       |            | BadR2, CtIsLarge, CurveFitl      |
| acrF           | 13B    | 30.93 | 81.89 | 1.94       | CtIsLarge, MultipleMeltPez       |
| acrR-01        | 13B    | 33.34 | 80.84 | 1.94       | CtIsLarge, MultipleMeltPez       |
| acrR-02        | 13B    | 33.35 | 87.01 | 1.91       | CtIsLarge                        |
| Actin          | 13B    | 20.55 | 87    | 1.97       |                                  |
| adeA           | 13B    |       |       |            | LowEfficiency, CtIsSmall, S;     |
| ampC-01        | 13B    | 31.48 | 85.17 | 1.96       | CtIsLarge, MultipleMeltPez       |
| ampC-02        | 13B    |       |       |            | CtIsLarge, CurveFitFailed        |
| ampC-04        | 13B    | 32.22 | 80.95 | 1.77       | LowEfficiency, CtIsLarge, M      |
| ampC-05        | 13B    |       |       |            | NoAmplification                  |
| ampC-06        | 13B    |       |       |            | NoAmplification                  |
| ampC-07        | 13B    | 34.55 | 88.2  | 1.86       | CtIsLarge                        |
| ampC-09        | 13B    |       |       |            | CurveFitFailed                   |
| ampC/blaDH     | 13B    | 29.86 | 85.05 | 1.99       | CtIsLarge                        |

|                            |     |       |       |      |                              |
|----------------------------|-----|-------|-------|------|------------------------------|
| aph                        | 13B |       |       |      | LowEfficiency, CtIsSmall, Ci |
| aph(2')-Id-01              | 13B |       |       |      | LowEfficiency, CtIsSmall, Ci |
| aph(2')-Id-02              | 13B |       |       |      | LowEfficiency, CtIsSmall, Ci |
| aph6ia                     | 13B |       |       |      | LowEfficiency, CtIsSmall, S: |
| aphA1(aka k <sub>z</sub> ) | 13B |       |       |      | LowEfficiency, CtIsSmall, Ci |
| bacA-01                    | 13B |       |       |      | CtIsLarge, CurveFitFailed    |
| bacA-02                    | 13B |       |       |      | LowEfficiency, CtIsLarge, Ci |
| BETA-globin                | 13B | 21.46 | 84.01 | 2.03 |                              |
| bla-ACC-1                  | 13B |       |       |      | LowEfficiency, CtIsLarge, Ci |
| bla-L1                     | 13B | 29.85 | 84.44 | 1.95 | CtIsLarge                    |
| bla1                       | 13B |       |       |      | LowEfficiency, CtIsSmall, S: |
| blaCMY                     | 13B |       |       |      | LowEfficiency, CtIsSmall, Ci |
| blaCMY2-01                 | 13B |       |       |      | NoAmplification              |
| blaCMY2-02                 | 13B | 29.77 | 81.98 | 1.91 | CtIsLarge, MultipleMeltPe:   |
| blaCTX-M-01                | 13B |       |       |      | CurveFitFailed               |
| blaCTX-M-02                | 13B |       |       |      | LowEfficiency, CtIsSmall, S: |
| blaCTX-M-03                | 13B |       |       |      | LowEfficiency, CtIsSmall, S: |
| blaCTX-M-04                | 13B |       |       |      | LowEfficiency, CtIsLarge, Ci |
| blaCTX-M-05                | 13B |       |       |      | LowEfficiency, CtIsLarge, S: |
| blaCTX-M-06                | 13B |       |       |      | CtIsLarge, CurveFitFailed    |
| blaGES                     | 13B |       |       |      | NoAmplification              |
| blaIMP-01                  | 13B | 33.6  | 74.51 | 1.94 | CtIsLarge                    |
| blaIMP-02                  | 13B |       |       |      | CtIsLarge, CurveFitFailed    |
| blaMOX/blaC                | 13B |       |       |      | NoAmplification              |
| blaOCH                     | 13B |       |       |      | NoAmplification              |
| blaOKP                     | 13B |       |       |      | NoAmplification              |
| blaOXA1/blaC               | 13B |       |       |      | LowEfficiency, CtIsSmall, Ci |
| blaOXA10-01                | 13B |       |       |      | NoAmplification              |
| blaOXA10-02                | 13B |       |       |      | LowEfficiency, CtIsSmall, Ci |
| blaOXY                     | 13B |       |       |      | CurveFitFailed               |
| blaPAO                     | 13B |       |       |      | NoAmplification              |
| blaPER                     | 13B |       |       |      | NoAmplification              |
| blaPSE                     | 13B |       |       |      | NoAmplification              |
| blaROB                     | 13B |       |       |      | NoAmplification              |
| blaSFO                     | 13B | 30.14 | 86.17 | 1.85 | CtIsLarge, MultipleMeltPe:   |
| blaSHV-01                  | 13B |       |       |      | CurveFitFailed               |
| blaSHV-02                  | 13B |       |       |      | CtIsLarge, CurveFitFailed    |
| blaTEM                     | 13B | 34.73 | 88.59 | 1.77 | LowEfficiency, CtIsLarge, S: |
| blaTLA                     | 13B |       |       |      | NoAmplification              |
| blaVEB                     | 13B |       |       |      | NoAmplification              |
| blaVIM                     | 13B |       |       |      | NoAmplification              |
| blaZ                       | 13B |       |       |      | NoAmplification              |
| carB                       | 13B |       |       |      | LowEfficiency, CtIsSmall, S: |
| catA1                      | 13B |       |       |      | NoAmplification              |
| catB3                      | 13B | 31.66 | 80.1  | 1.89 | CtIsLarge                    |
| catB8                      | 13B | 28.49 | 81.98 | 2.04 |                              |

|            |     |       |       |      |                              |
|------------|-----|-------|-------|------|------------------------------|
| ceoA       | 13B | 27.46 | 83.55 | 2.03 | MultipleMeltPeaks            |
| cepA       | 13B |       |       |      | NoAmplification              |
| cfiA       | 13B | 29.58 | 83.23 | 1.8  | LowEfficiency, CtIsLarge, S: |
| cfr        | 13B |       |       |      | LowEfficiency, CtIsSmall, S: |
| cfxA       | 13B |       |       |      | LowEfficiency, CtIsSmall, S: |
| cmeA       | 13B |       |       |      | LowEfficiency, CtIsSmall, Ci |
| cmlA1-01   | 13B |       |       |      | CtIsLarge, CurveFitFailed    |
| cmlA1-02   | 13B |       |       |      | CtIsLarge, CurveFitFailed    |
| cmr        | 13B |       |       |      | LowEfficiency, CtIsSmall, Ci |
| cmx(A)     | 13B | 28.14 | 86.72 | 2.06 | MultipleMeltPeaks            |
| cphA-01    | 13B | 31.93 | 86.37 | 1.69 | LowEfficiency, CtIsLarge     |
| cphA-02    | 13B | 33.57 | 85.8  | 1.83 | CtIsLarge                    |
| dfrA1      | 13B | 34.66 | 78.13 | 1.92 | CtIsLarge, MultipleMeltPe:   |
| dfrA12     | 13B |       |       |      | LowEfficiency, CtIsLarge, Ci |
| emrD       | 13B |       |       |      | NoAmplification              |
| ereA       | 13B |       |       |      | CtIsLarge, CurveFitFailed    |
| ereB       | 13B | 33.2  | 84.67 | 2.02 | CtIsLarge, MultipleMeltPe:   |
| erm(34)    | 13B |       |       |      | NoAmplification              |
| erm(35)    | 13B |       |       |      | LowEfficiency, CtIsSmall, Ci |
| erm(36)    | 13B | 32.4  | 80.09 | 1.8  | CtIsLarge, MultipleMeltPe:   |
| ermA       | 13B |       |       |      | LowEfficiency, CtIsSmall, Ci |
| ermA/ermTR | 13B |       |       |      | LowEfficiency, CtIsLarge, Ci |
| ermB       | 13B |       |       |      | LowEfficiency, CtIsSmall, Ci |
| ermC       | 13B |       |       |      | BadR2, LowEfficiency, CtIsS  |
| ermF       | 13B |       |       |      | LowEfficiency, CtIsSmall, S: |
| ermJ/ermD  | 13B |       |       |      | LowEfficiency, CtIsSmall, Ci |
| ermK-01    | 13B |       |       |      | CtIsLarge, CurveFitFailed    |
| ermK-02    | 13B |       |       |      | LowEfficiency, CtIsLarge, Ci |
| ermT-01    | 13B |       |       |      | LowEfficiency, CtIsSmall, Ci |
| ermT-02    | 13B | 34.8  | 80.23 | 2.02 | CtIsLarge                    |
| ermX       | 13B |       |       |      | LowEfficiency, CtIsLarge, Ci |
| ermY       | 13B |       |       |      | CurveFitFailed               |
| fabK       | 13B | 27.76 | 79.11 | 2.22 |                              |
| floR       | 13B |       |       |      | NoAmplification              |
| folA       | 13B |       |       |      | NoAmplification              |
| fosB       | 13B |       |       |      | LowEfficiency, CtIsSmall, S: |
| fosX       | 13B |       |       |      | LowEfficiency, CtIsSmall, Ci |
| fox5       | 13B | 28.66 | 86.09 | 1.77 | LowEfficiency                |
| imiR       | 13B |       |       |      | NoAmplification              |
| ImrA-01    | 13B |       |       |      | CtIsLarge, CurveFitFailed    |
| intl       | 13B | 29.76 | 84.94 | 1.81 | CtIsLarge                    |
| intl1      | 13B | 19.62 | 87.06 | 2.04 |                              |
| IS613      | 13B |       |       |      | CtIsLarge, CurveFitFailed    |
| InuA-01    | 13B |       |       |      | CurveFitFailed               |
| InuB-01    | 13B |       |       |      | BadR2, LowEfficiency, CtIsS  |
| InuB-02    | 13B |       |       |      | LowEfficiency, CtIsSmall, Ci |

|                |     |       |       |      |                             |
|----------------|-----|-------|-------|------|-----------------------------|
| InuC           | 13B | 32.23 | 86.85 | 1.96 | CtIsLarge                   |
| marR-01        | 13B | 33.81 | 85.18 | 1.98 | CtIsLarge                   |
| matA/mel       | 13B | 28.81 | 82.3  | 2.07 |                             |
| mdet1          | 13B |       |       |      | CurveFitFailed              |
| mdtA           | 13B | 34.22 | 81.79 | 1.86 | CtIsLarge, MultipleMeltPea  |
| mdtE/yhiU      | 13B |       |       |      | LowEfficiency, CtIsSmall, S |
| mecA           | 13B |       |       |      | NoAmplification             |
| mefA           | 13B | 32.37 | 80.18 | 2.01 | CtIsLarge                   |
| mepA           | 13B | 31.44 | 77.82 | 1.97 | CtIsLarge, MultipleMeltPea  |
| mexA           | 13B |       |       |      | CtIsLarge, CurveFitFailed   |
| mexD           | 13B | 32.01 | 80.1  | 2.01 | CtIsLarge                   |
| mexE           | 13B |       |       |      | LowEfficiency, CtIsLarge, C |
| mexF           | 13B | 27.28 | 86.22 | 1.8  |                             |
| mphA-01        | 13B | 28.61 | 86.72 | 2    |                             |
| mphA-02        | 13B | 30.72 | 86.69 | 1.9  | CtIsLarge, SaturationBaseli |
| mphB           | 13B |       |       |      | LowEfficiency, CtIsLarge, C |
| mphC           | 13B |       |       |      | LowEfficiency, CtIsLarge, C |
| msrA-01        | 13B |       |       |      | LowEfficiency, CtIsSmall, C |
| msrC-01        | 13B |       |       |      | NoAmplification             |
| mtrC-01        | 13B |       |       |      | CtIsLarge, CurveFitFailed   |
| mtrC-02        | 13B |       |       |      | CtIsLarge, CurveFitFailed   |
| mtrD-02        | 13B | 28.12 | 81.13 | 1.86 |                             |
| mtrD-03        | 13B |       |       |      | LowEfficiency, CtIsLarge, C |
| NDM1           | 13B |       |       |      | CurveFitFailed              |
| nimE           | 13B |       |       |      | LowEfficiency, CtIsSmall, S |
| nisB           | 13B |       |       |      | CtIsLarge, CurveFitFailed   |
| oleC           | 13B |       |       |      | CtIsLarge, CurveFitFailed   |
| oprD           | 13B | 30.09 | 82.24 | 1.96 | CtIsLarge                   |
| oprJ           | 13B |       |       |      | NoAmplification             |
| pbp            | 13B |       |       |      | LowEfficiency, CtIsSmall, S |
| pbp2x          | 13B |       |       |      | NoAmplification             |
| Pbp5           | 13B |       |       |      | LowEfficiency, CtIsSmall, S |
| penA           | 13B |       |       |      | LowEfficiency, CtIsLarge, C |
| pikR1          | 13B |       |       |      | BadR2, LowEfficiency, CtIsS |
| pikR2          | 13B | 32.21 | 85.18 | 1.89 | CtIsLarge                   |
| pmrA           | 13B |       |       |      | LowEfficiency, CtIsSmall, C |
| pncA           | 13B | 33.04 | 81.59 | 2.04 | CtIsLarge                   |
| putative multi | 13B |       |       |      | CurveFitFailed              |
| qac            | 13B |       |       |      | CurveFitFailed              |
| qacA           | 13B |       |       |      | LowEfficiency, CtIsLarge, S |
| qacA/qacB      | 13B |       |       |      | NoAmplification             |
| qacEdelta1-0   | 13B |       |       |      | NoAmplification             |
| qacEdelta1-0   | 13B | 30.67 | 76.94 | 1.93 | CtIsLarge                   |
| qacH-01        | 13B | 32.86 | 86.41 | 1.88 | CtIsLarge                   |
| qacH-02        | 13B |       |       |      | LowEfficiency, CtIsLarge, C |
| qnrA           | 13B | 34.66 | 73.08 | 1.97 | CtIsLarge, MultipleMeltPea  |



|              |     |       |       |                                   |
|--------------|-----|-------|-------|-----------------------------------|
| rarD-02      | 13B |       |       | NoAmplification                   |
| sat4         | 13B |       |       | LowEfficiency, CtIsSmall, Ci      |
| sdeB         | 13B |       |       | CurveFitFailed                    |
| spcN-01      | 13B | 34.96 | 83.9  | 2 CtIsLarge                       |
| speA         | 13B |       |       | NoAmplification                   |
| str          | 13B |       |       | CurveFitFailed                    |
| strA         | 13B |       |       | LowEfficiency, CtIsSmall, Ci      |
| strB         | 13B |       |       | CtIsLarge, CurveFitFailed         |
| sul1         | 13B | 33.65 | 88.44 | 1.8 LowEfficiency, CtIsLarge, S:  |
| sul2         | 13B |       |       | LowEfficiency, CtIsSmall, Ci      |
| sulA/foIP-01 | 13B | 29.13 | 77.7  | 1.99                              |
| sulA/foIP-03 | 13B | 30.52 | 84.7  | 1.81 CtIsLarge                    |
| tet(32)      | 13B | 33.02 | 86.41 | 1.83 CtIsLarge                    |
| tet(34)      | 13B | 33.88 | 75.22 | 1.87 CtIsLarge                    |
| tet(35)      | 13B | 29.26 | 76.73 | 1.97 MultipleMeltPeaks            |
| tet(36)-A    | 13B |       |       | NoAmplification                   |
| tet(36)-B    | 13B | 32.08 | 79.09 | 1.97 CtIsLarge                    |
| tet(37)      | 13B | 29.01 | 86.18 | 1.67 LowEfficiency                |
| tetA-01      | 13B | 32.38 | 84.99 | 1.71 LowEfficiency, CtIsLarge, S: |
| tetA-02      | 13B | 34.45 | 82.85 | 1.89 CtIsLarge                    |
| tetB-01      | 13B | 30.67 | 79.3  | 1.99 CtIsLarge, MultipleMeltPe:   |
| tetB-02      | 13B |       |       | LowEfficiency, CtIsSmall, Ci      |
| tetC-01      | 13B |       |       | NoAmplification                   |
| tetC-02      | 13B |       |       | CtIsLarge, CurveFitFailed         |
| tetD-01      | 13B |       |       | LowEfficiency, CtIsSmall, Ci      |
| tetD-02      | 13B |       |       | CtIsLarge, CurveFitFailed         |
| tetE         | 13B |       |       | LowEfficiency, CtIsSmall, Ci      |
| tetG-01      | 13B |       |       | LowEfficiency, CtIsSmall, S:      |
| tetG-02      | 13B |       |       | LowEfficiency, CtIsSmall, Ci      |
| tetH         | 13B |       |       | LowEfficiency, CtIsSmall, S:      |
| tetJ         | 13B |       |       | LowEfficiency, CtIsSmall, S:      |
| tetK         | 13B |       |       | LowEfficiency, CtIsSmall, S:      |
| tetL-01      | 13B |       |       | LowEfficiency, CtIsSmall, Ci      |
| tetL-02      | 13B |       |       | LowEfficiency, CtIsSmall, Ci      |
| tetM-01      | 13B |       |       | LowEfficiency, CtIsSmall, S:      |
| tetM-02      | 13B |       |       | NoAmplification                   |
| tetO-01      | 13B |       |       | LowEfficiency, CtIsSmall, Ci      |
| tetPA        | 13B |       |       | NoAmplification                   |
| tetPB-01     | 13B |       |       | CtIsLarge, CurveFitFailed         |
| tetPB-02     | 13B | 28.37 | 84.71 | 2.07                              |
| tetPB-03     | 13B |       |       | LowEfficiency, CtIsSmall, Ci      |
| tetPB-05     | 13B |       |       | CurveFitFailed                    |
| tetQ         | 13B |       |       | LowEfficiency, CtIsSmall, S:      |
| tetR-02      | 13B | 30.6  | 85.01 | 1.95 CtIsLarge                    |
| tetR-03      | 13B |       |       | LowEfficiency, CtIsSmall, Ci      |
| tetS         | 13B | 33.93 | 85.2  | 1.77 LowEfficiency, CtIsLarge, M  |

|             |     |       |       |      |                             |
|-------------|-----|-------|-------|------|-----------------------------|
| tetT        | 13B |       |       |      | NoAmplification             |
| tetU-01     | 13B |       |       |      | LowEfficiency, CtIsSmall, S |
| tetV        | 13B |       |       |      | LowEfficiency, CtIsSmall, C |
| tetW-01     | 13B |       |       |      | LowEfficiency, CtIsSmall, C |
| tetX        | 13B |       |       |      | LowEfficiency, CtIsSmall, S |
| tnpA-01     | 13B |       |       |      | CtIsLarge, CurveFitFailed   |
| tnpA-02     | 13B |       |       |      | LowEfficiency, CtIsLarge, C |
| tnpA-03     | 13B |       |       |      | CtIsLarge, CurveFitFailed   |
| tnpA-04     | 13B |       |       |      | LowEfficiency, CtIsSmall, S |
| tnpA-05     | 13B |       |       |      | LowEfficiency, CtIsLarge, C |
| tnpA-07     | 13B |       |       |      | NoAmplification             |
| tolC-01     | 13B |       |       |      | LowEfficiency, CtIsLarge, C |
| tolC-02     | 13B | 30.02 | 87.59 | 1.99 | CtIsLarge                   |
| tolC-03     | 13B | 28.94 | 85.23 | 1.99 |                             |
| Tp614       | 13B | 34.25 | 83.89 | 1.95 | CtIsLarge                   |
| ttgA        | 13B |       |       |      | CtIsLarge, CurveFitFailed   |
| ttgB        | 13B | 31.53 | 84.01 | 1.99 | CtIsLarge                   |
| vanA        | 13B |       |       |      | NoAmplification             |
| vanB-01     | 13B | 29.43 | 82.72 | 1.9  |                             |
| vanC-01     | 13B |       |       |      | LowEfficiency, CtIsSmall, C |
| vanC-02     | 13B |       |       |      | LowEfficiency, CtIsSmall, S |
| vanC-03     | 13B | 25.65 | 86.68 | 1.98 |                             |
| vanC1       | 13B |       |       |      | LowEfficiency, CtIsSmall, S |
| vanC2/vanC3 | 13B | 30.08 | 82.54 | 1.95 | CtIsLarge                   |
| vanG        | 13B |       |       |      | BadR2, LowEfficiency, CtIsS |
| vanHB       | 13B |       |       |      | CtIsLarge, CurveFitFailed   |
| vanHD       | 13B | 31.89 | 87.22 | 1.86 | CtIsLarge                   |
| vanRA-01    | 13B |       |       |      | NoAmplification             |
| vanRA-02    | 13B |       |       |      | CtIsLarge, CurveFitFailed   |
| vanRB       | 13B | 32.27 | 85.43 | 1.95 | CtIsLarge                   |
| vanRC       | 13B |       |       |      | LowEfficiency, CtIsSmall, C |
| vanRC4      | 13B |       |       |      | LowEfficiency, CtIsSmall, C |
| vanRD       | 13B |       |       |      | NoAmplification             |
| vanSA       | 13B |       |       |      | LowEfficiency, CtIsSmall, S |
| vanSB       | 13B | 27.99 | 74.36 | 2.05 |                             |
| vanSC-01    | 13B | 33.71 | 83.9  | 2    | CtIsLarge                   |
| vanSC-02    | 13B |       |       |      | NoAmplification             |
| vanTC-01    | 13B |       |       |      | LowEfficiency, CtIsSmall, C |
| vanTC-02    | 13B |       |       |      | NoAmplification             |
| vanTE       | 13B |       |       |      | LowEfficiency, CtIsSmall, S |
| vanTG       | 13B |       |       |      | NoAmplification             |
| vanWB       | 13B |       |       |      | LowEfficiency, CtIsSmall, C |
| vanWG       | 13B |       |       |      | CtIsLarge, CurveFitFailed   |
| vanXA       | 13B |       |       |      | CurveFitFailed              |
| vanXB       | 13B |       |       |      | NoAmplification             |
| vanXD       | 13B | 29.2  | 75.24 | 2.04 |                             |

|              |     |       |       |      |                             |
|--------------|-----|-------|-------|------|-----------------------------|
| vanYB        | 13B |       |       |      | CtIsLarge, CurveFitFailed   |
| vanYD-01     | 13B | 30.99 | 82.14 | 1.76 | LowEfficiency, CtIsLarge    |
| vanYD-02     | 13B |       |       |      | LowEfficiency, CtIsSmall, S |
| vatB-01      | 13B |       |       |      | BadR2, LowEfficiency, CtIsS |
| vatB-02      | 13B | 34.38 | 85.4  | 2.03 | CtIsLarge                   |
| vatC-01      | 13B |       |       |      | CtIsLarge, CurveFitFailed   |
| vatC-02      | 13B | 31.93 | 87.46 | 1.99 | CtIsLarge                   |
| vatE-01      | 13B | 30.42 | 77.18 | 2.01 | CtIsLarge                   |
| vatE-02      | 13B |       |       |      | NoAmplification             |
| vgaA-01      | 13B |       |       |      | LowEfficiency, CtIsSmall, C |
| vgaA-02      | 13B |       |       |      | LowEfficiency, CtIsSmall, S |
| vgb-01       | 13B |       |       |      | BadR2, LowEfficiency, CtIsS |
| vgbB-01      | 13B |       |       |      | LowEfficiency, CtIsSmall, C |
| vgbB-02      | 13B |       |       |      | LowEfficiency, CtIsSmall, C |
| yceE/mdtG-0  | 13B | 33.61 | 77.35 | 2.1  | CtIsLarge                   |
| yceE/mdtG-0  | 13B |       |       |      | LowEfficiency, CtIsSmall, S |
| yceL/mdtH-0  | 13B | 30.68 | 82.16 | 1.89 | CtIsLarge, MultipleMeltPe   |
| yceL/mdtH-0  | 13B |       |       |      | LowEfficiency, CtIsSmall, C |
| yceL/mdtH-0  | 13B | 33.8  | 80.04 | 2    | CtIsLarge, MultipleMeltPe   |
| yidY/mdtL-01 | 13B | 31.11 | 85.75 | 2.03 | CtIsLarge, MultipleMeltPe   |
| yidY/mdtL-02 | 13B |       |       |      | LowEfficiency, CtIsSmall, C |































| Assay          | Sample | Ct | Tm    | Efficiency | flag                         |
|----------------|--------|----|-------|------------|------------------------------|
| 16S rRNA       | 13C    |    | 20.74 | 82.08      | 2.01                         |
| aac            | 13C    |    | 34.56 | 86.22      | 1.94 MultipleMeltPeaks       |
| aac(6')-Ib(akz | 13C    |    |       |            | LowEfficiency, CtIsSmall, S: |
| aac(6')-Ib(akz | 13C    |    | 31.94 | 79.26      | 1.98 MultipleMeltPeaks       |
| aac(6')-Ib(akz | 13C    |    | 34.77 | 82.05      | 1.94                         |
| aac(6')-II     | 13C    |    | 35.23 | 81.08      | 1.62 MultipleMeltPeaks       |
| aac(6')I1      | 13C    |    |       |            | CurveFitFailed               |
| aacA/aphD      | 13C    |    |       |            | NoAmplification              |
| aacC           | 13C    |    | 29.88 | 87.34      | 2.02 MultipleMeltPeaks       |
| aacC1          | 13C    |    |       |            | LowEfficiency, CtIsSmall, C: |
| aacC2          | 13C    |    |       |            | NoAmplification              |
| aacC4          | 13C    |    |       |            | NoAmplification              |
| aadA-01        | 13C    |    |       |            | CurveFitFailed               |
| aadA-02        | 13C    |    | 38.59 | 80.79      | 1.81                         |
| aadA-1-01      | 13C    |    |       |            | NoAmplification              |
| aadA-1-02      | 13C    |    |       |            | CurveFitFailed               |
| aadA1          | 13C    |    |       |            | CurveFitFailed               |
| aadA2-01       | 13C    |    |       |            | CurveFitFailed               |
| aadA2-02       | 13C    |    | 34.52 | 75.04      | 2.03                         |
| aadA2-03       | 13C    |    |       |            | NoAmplification              |
| aadA5-01       | 13C    |    |       |            | CurveFitFailed               |
| aadA5-02       | 13C    |    | 31.89 | 87.52      | 1.95 MultipleMeltPeaks       |
| aadA9-01       | 13C    |    | 40.66 | 79.78      | 1.77 MultipleMeltPeaks       |
| aadA9-02       | 13C    |    |       |            | NoAmplification              |
| aadD           | 13C    |    |       |            | LowEfficiency, CtIsSmall, S: |
| aadE           | 13C    |    |       |            | LowEfficiency, CtIsSmall, S: |
| acrA-01        | 13C    |    | 34.11 | 88.53      | 1.83                         |
| acrA-02        | 13C    |    |       |            | CurveFitFailed               |
| acrA-03        | 13C    |    | 39.19 | 87.59      | 1.63                         |
| acrA-04        | 13C    |    | 30.23 | 80.48      | 1.98                         |
| acrA-05        | 13C    |    | 31.06 | 79.85      | 1.96 MultipleMeltPeaks       |
| acrB-01        | 13C    |    |       |            | CurveFitFailed               |
| acrF           | 13C    |    | 31.44 | 84.2       | 2                            |
| acrR-01        | 13C    |    |       |            | CurveFitFailed               |
| acrR-02        | 13C    |    | 35.39 | 77.59      | 1.89                         |
| Actin          | 13C    |    | 23.99 | 86.84      | 1.95                         |
| adeA           | 13C    |    |       |            | CurveFitFailed               |
| ampC-01        | 13C    |    | 33.52 | 80.36      | 1.98                         |
| ampC-02        | 13C    |    |       |            | NoAmplification              |
| ampC-04        | 13C    |    | 33.84 | 77.97      | 1.94 MultipleMeltPeaks       |
| ampC-05        | 13C    |    | 37.23 | 89.6       | 1.63                         |
| ampC-06        | 13C    |    |       |            | CurveFitFailed               |
| ampC-07        | 13C    |    | 34.19 | 79.69      | 1.9                          |
| ampC-09        | 13C    |    |       |            | CurveFitFailed               |
| ampC/blaDH     | 13C    |    | 34.5  | 85.55      | 1.9 MultipleMeltPeaks        |

|                          |     |       |       |      |                              |
|--------------------------|-----|-------|-------|------|------------------------------|
| aph                      | 13C |       |       |      | LowEfficiency, CtIsSmall, S: |
| aph(2')-Id-01            | 13C |       |       |      | LowEfficiency, CtIsSmall, S: |
| aph(2')-Id-02            | 13C |       |       |      | LowEfficiency, CtIsSmall, S: |
| aph6ia                   | 13C | 34.4  | 77.67 | 1.91 | MultipleMeltPeaks            |
| aphA1(aka k <sub>z</sub> | 13C |       |       |      | LowEfficiency, CtIsSmall, S: |
| bacA-01                  | 13C | 35.22 | 75.41 | 2    |                              |
| bacA-02                  | 13C | 34.77 | 83.57 | 1.78 |                              |
| BETA-globin              | 13C | 24.39 | 83.97 | 1.97 |                              |
| bla-ACC-1                | 13C | 39.17 | 78.5  | 1.73 | MultipleMeltPeaks            |
| bla-L1                   | 13C | 33.14 | 84.65 | 2    |                              |
| bla1                     | 13C |       |       |      | CurveFitFailed               |
| blaCMY                   | 13C |       |       |      | CurveFitFailed               |
| blaCMY2-01               | 13C | 36.58 | 76.24 | 1.76 | MultipleMeltPeaks            |
| blaCMY2-02               | 13C | 30.22 | 83.23 | 1.97 | MultipleMeltPeaks            |
| blaCTX-M-01              | 13C |       |       |      | NoAmplification              |
| blaCTX-M-02              | 13C | 31.87 | 87.29 | 1.91 | MultipleMeltPeaks            |
| blaCTX-M-03              | 13C | 38.8  | 88.37 | 1.73 |                              |
| blaCTX-M-04              | 13C | 32.56 | 89.53 | 1.96 |                              |
| blaCTX-M-05              | 13C | 35.13 | 76.32 | 1.62 |                              |
| blaCTX-M-06              | 13C |       |       |      | NoAmplification              |
| blaGES                   | 13C |       |       |      | NoAmplification              |
| blaIMP-01                | 13C |       |       |      | NoAmplification              |
| blaIMP-02                | 13C |       |       |      | CurveFitFailed               |
| blaMOX/blaC              | 13C | 35.19 | 82.38 | 1.89 |                              |
| blaOCH                   | 13C |       |       |      | NoAmplification              |
| blaOKP                   | 13C |       |       |      | NoAmplification              |
| blaOXA1/blaC             | 13C |       |       |      | CurveFitFailed               |
| blaOXA10-01              | 13C |       |       |      | NoAmplification              |
| blaOXA10-02              | 13C |       |       |      | LowEfficiency, CtIsSmall, C: |
| blaOXY                   | 13C | 36.63 | 88.82 | 1.69 |                              |
| blaPAO                   | 13C |       |       |      | NoAmplification              |
| blaPER                   | 13C | 36.43 | 81.38 | 1.79 | MultipleMeltPeaks            |
| blaPSE                   | 13C |       |       |      | NoAmplification              |
| blaROB                   | 13C |       |       |      | NoAmplification              |
| blaSFO                   | 13C | 31.35 | 80.4  | 1.92 |                              |
| blaSHV-01                | 13C | 34.22 | 80.32 | 2.04 |                              |
| blaSHV-02                | 13C |       |       |      | LowEfficiency, CtIsSmall, S: |
| blaTEM                   | 13C | 36.52 | 78    | 1.98 |                              |
| blaTLA                   | 13C |       |       |      | LowEfficiency, CtIsSmall, S: |
| blaVEB                   | 13C |       |       |      | LowEfficiency, CtIsSmall, C: |
| blaVIM                   | 13C |       |       |      | NoAmplification              |
| blaZ                     | 13C |       |       |      | LowEfficiency, CtIsSmall, S: |
| carB                     | 13C |       |       |      | NoAmplification              |
| catA1                    | 13C |       |       |      | NoAmplification              |
| catB3                    | 13C |       |       |      | NoAmplification              |
| catB8                    | 13C | 28.95 | 82.19 | 1.99 |                              |

|            |     |       |       |      |                              |
|------------|-----|-------|-------|------|------------------------------|
| ceoA       | 13C | 30.85 | 83.81 | 2    |                              |
| cepA       | 13C |       |       |      | NoAmplification              |
| cfiA       | 13C | 34.17 | 86.1  | 1.86 |                              |
| cfr        | 13C |       |       |      | LowEfficiency, CtIsSmall, S: |
| cfxA       | 13C | 28.2  | 77.22 | 2.06 |                              |
| cmeA       | 13C |       |       |      | CurveFitFailed               |
| cmlA1-01   | 13C |       |       |      | CurveFitFailed               |
| cmlA1-02   | 13C |       |       |      | CurveFitFailed               |
| cmr        | 13C | 32.15 | 78.58 | 1.92 |                              |
| cmx(A)     | 13C | 28.05 | 84.48 | 2.02 |                              |
| cphA-01    | 13C | 33.17 | 85.19 | 1.99 | MultipleMeltPeaks            |
| cphA-02    | 13C | 32.43 | 82.35 | 1.97 |                              |
| dfrA1      | 13C |       |       |      | NoAmplification              |
| dfrA12     | 13C |       |       |      | CurveFitFailed               |
| emrD       | 13C |       |       |      | CurveFitFailed               |
| ereA       | 13C | 36.9  | 83.27 | 1.85 |                              |
| ereB       | 13C |       |       |      | CurveFitFailed               |
| erm(34)    | 13C |       |       |      | NoAmplification              |
| erm(35)    | 13C |       |       |      | LowEfficiency, CtIsSmall, C: |
| erm(36)    | 13C |       |       |      | CurveFitFailed               |
| ermA       | 13C |       |       |      | LowEfficiency, CtIsSmall, S: |
| ermA/ermTR | 13C |       |       |      | NoAmplification              |
| ermB       | 13C | 22.73 | 75.04 | 2.18 |                              |
| ermC       | 13C |       |       |      | CurveFitFailed               |
| ermF       | 13C |       |       |      | NoAmplification              |
| ermJ/ermD  | 13C |       |       |      | LowEfficiency, CtIsSmall, C: |
| ermK-01    | 13C |       |       |      | CurveFitFailed               |
| ermK-02    | 13C |       |       |      | CurveFitFailed               |
| ermT-01    | 13C |       |       |      | CurveFitFailed               |
| ermT-02    | 13C |       |       |      | CurveFitFailed               |
| ermX       | 13C |       |       |      | CurveFitFailed               |
| ermY       | 13C |       |       |      | LowEfficiency, CtIsSmall, S: |
| fabK       | 13C | 27.14 | 79.22 | 1.99 |                              |
| floR       | 13C |       |       |      | NoAmplification              |
| folA       | 13C |       |       |      | NoAmplification              |
| fosB       | 13C |       |       |      | LowEfficiency, CtIsSmall, S: |
| fosX       | 13C |       |       |      | LowEfficiency, CtIsSmall, S: |
| fox5       | 13C | 27.71 | 86.04 | 1.98 |                              |
| imiR       | 13C |       |       |      | CurveFitFailed               |
| ImrA-01    | 13C | 43.73 | 61.9  | 2.06 | BadR2, MultipleMeltPeaks     |
| intl       | 13C | 30.76 | 84.74 | 2    |                              |
| intl1      | 13C | 20.78 | 86.92 | 2.06 |                              |
| IS613      | 13C |       |       |      | LowEfficiency, CtIsSmall, S: |
| lnuA-01    | 13C |       |       |      | NoAmplification              |
| lnuB-01    | 13C |       |       |      | LowEfficiency, CtIsSmall, S: |
| lnuB-02    | 13C |       |       |      | LowEfficiency, CtIsSmall, S: |

|                |     |       |       |      |                              |
|----------------|-----|-------|-------|------|------------------------------|
| lnuC           | 13C |       |       |      | CurveFitFailed               |
| marR-01        | 13C | 36.47 | 82.37 | 1.7  |                              |
| matA/mel       | 13C | 21.3  | 77.75 | 2.07 |                              |
| mdet1          | 13C |       |       |      | NoAmplification              |
| mdtA           | 13C |       |       |      | CurveFitFailed               |
| mdtE/yhiU      | 13C | 30.4  | 85.41 | 1.97 |                              |
| mecA           | 13C |       |       |      | LowEfficiency, CtIsSmall, S: |
| mefA           | 13C | 20.79 | 80.63 | 1.99 |                              |
| mepA           | 13C | 33.46 | 84.67 | 1.99 |                              |
| mexA           | 13C |       |       |      | CurveFitFailed               |
| mexD           | 13C | 32.44 | 79.92 | 1.93 | MultipleMeltPeaks            |
| mexE           | 13C | 40.32 | 87.99 | 1.67 | MultipleMeltPeaks            |
| mexF           | 13C | 30.11 | 84.38 | 2.01 | MultipleMeltPeaks            |
| mphA-01        | 13C | 32.26 | 80.55 | 1.97 |                              |
| mphA-02        | 13C | 31.97 | 77.1  | 2.03 | MultipleMeltPeaks            |
| mphB           | 13C | 35.79 | 84.61 | 1.86 |                              |
| mphC           | 13C |       |       |      | CurveFitFailed               |
| msrA-01        | 13C |       |       |      | CurveFitFailed               |
| msrC-01        | 13C |       |       |      | NoAmplification              |
| mtrC-01        | 13C |       |       |      | LowEfficiency, CtIsSmall, S: |
| mtrC-02        | 13C | 34.49 | 84.02 | 2    |                              |
| mtrD-02        | 13C | 26.27 | 81.64 | 2    |                              |
| mtrD-03        | 13C | 32.04 | 82.26 | 1.93 |                              |
| NDM1           | 13C |       |       |      | CurveFitFailed               |
| nimE           | 13C |       |       |      | LowEfficiency, CtIsSmall, S: |
| nisB           | 13C |       |       |      | CurveFitFailed               |
| oleC           | 13C | 36.68 | 75.89 | 1.88 |                              |
| oprD           | 13C | 28.6  | 86.82 | 1.98 |                              |
| oprJ           | 13C | 31.94 | 88.59 | 1.98 |                              |
| pbp            | 13C |       |       |      | NoAmplification              |
| pbp2x          | 13C |       |       |      | NoAmplification              |
| Pbp5           | 13C |       |       |      | LowEfficiency, CtIsSmall, S: |
| penA           | 13C | 36.35 | 84.75 | 1.71 |                              |
| pikR1          | 13C |       |       |      | CurveFitFailed               |
| pikR2          | 13C | 34.19 | 85.13 | 1.91 |                              |
| pmrA           | 13C | 26.05 | 78.78 | 2.07 |                              |
| pncA           | 13C | 31.93 | 89.66 | 1.82 |                              |
| putative multi | 13C | 30.71 | 83.97 | 2.02 |                              |
| qac            | 13C |       |       |      | CurveFitFailed               |
| qacA           | 13C |       |       |      | LowEfficiency, CtIsSmall, S: |
| qacA/qacB      | 13C |       |       |      | NoAmplification              |
| qacEdelta1-0   | 13C |       |       |      | CurveFitFailed               |
| qacEdelta1-0   | 13C | 35.47 | 75.45 | 1.95 |                              |
| qacH-01        | 13C | 32.65 | 86.44 | 1.98 |                              |
| qacH-02        | 13C |       |       |      | CurveFitFailed               |
| qnrA           | 13C |       |       |      | NoAmplification              |

|              |     |       |       |      |                              |
|--------------|-----|-------|-------|------|------------------------------|
| rarD-02      | 13C |       |       |      | NoAmplification              |
| sat4         | 13C |       |       |      | CurveFitFailed               |
| sdeB         | 13C |       |       |      | NoAmplification              |
| spcN-01      | 13C |       |       |      | NoAmplification              |
| speA         | 13C |       |       |      | NoAmplification              |
| str          | 13C |       |       |      | NoAmplification              |
| strA         | 13C |       |       |      | LowEfficiency, CtIsSmall, S: |
| strB         | 13C |       |       |      | CurveFitFailed               |
| sul1         | 13C | 38.33 | 89.34 | 1.6  | MultipleMeltPeaks            |
| sul2         | 13C |       |       |      | LowEfficiency, CtIsSmall, S: |
| sulA/foIP-01 | 13C | 24.16 | 80.88 | 1.99 |                              |
| sulA/foIP-03 | 13C | 25.4  | 82.84 | 2    |                              |
| tet(32)      | 13C |       |       |      | NoAmplification              |
| tet(34)      | 13C | 30.56 | 75.82 | 2.01 |                              |
| tet(35)      | 13C |       |       |      | NoAmplification              |
| tet(36)-A    | 13C |       |       |      | CurveFitFailed               |
| tet(36)-B    | 13C |       |       |      | LowEfficiency, CtIsSmall, S: |
| tet(37)      | 13C | 24.91 | 75.92 | 2    |                              |
| tetA-01      | 13C | 33.36 | 85.1  | 1.89 |                              |
| tetA-02      | 13C |       |       |      | NoAmplification              |
| tetB-01      | 13C | 33.44 | 81.24 | 1.96 | MultipleMeltPeaks            |
| tetB-02      | 13C |       |       |      | LowEfficiency, CtIsSmall, S: |
| tetC-01      | 13C |       |       |      | NoAmplification              |
| tetC-02      | 13C |       |       |      | CurveFitFailed               |
| tetD-01      | 13C |       |       |      | LowEfficiency, CtIsSmall, C: |
| tetD-02      | 13C | 43.75 | 79.86 | 1.69 |                              |
| tetE         | 13C |       |       |      | BadR2, LowEfficiency, CtIsS  |
| tetG-01      | 13C |       |       |      | CurveFitFailed               |
| tetG-02      | 13C | 36.55 | 82.74 | 1.81 |                              |
| tetH         | 13C |       |       |      | LowEfficiency, CtIsSmall, C: |
| tetJ         | 13C |       |       |      | LowEfficiency, CtIsSmall, S: |
| tetK         | 13C |       |       |      | LowEfficiency, CtIsSmall, S: |
| tetL-01      | 13C |       |       |      | LowEfficiency, CtIsSmall, S: |
| tetL-02      | 13C | 37.7  | 85.45 | 1.58 |                              |
| tetM-01      | 13C | 22.05 | 76.22 | 2.07 |                              |
| tetM-02      | 13C | 23.63 | 77.5  | 2.02 |                              |
| tetO-01      | 13C | 23.18 | 76.84 | 2.07 |                              |
| tetPA        | 13C |       |       |      | NoAmplification              |
| tetPB-01     | 13C |       |       |      | NoAmplification              |
| tetPB-02     | 13C | 29.14 | 84.78 | 2.03 |                              |
| tetPB-03     | 13C |       |       |      | LowEfficiency, CtIsSmall, S: |
| tetPB-05     | 13C |       |       |      | LowEfficiency, CtIsSmall, S: |
| tetQ         | 13C |       |       |      | NoAmplification              |
| tetR-02      | 13C |       |       |      | CurveFitFailed               |
| tetR-03      | 13C |       |       |      | CurveFitFailed               |
| tetS         | 13C | 37.86 | 86.86 | 1.78 |                              |

|             |     |       |       |      |                                          |
|-------------|-----|-------|-------|------|------------------------------------------|
| tetT        | 13C |       |       |      | CurveFitFailed                           |
| tetU-01     | 13C |       |       |      | LowEfficiency, CtIsSmall, S <sub>e</sub> |
| tetV        | 13C |       |       |      | LowEfficiency, CtIsSmall, S <sub>e</sub> |
| tetW-01     | 13C |       |       |      | CurveFitFailed                           |
| tetX        | 13C |       |       |      | CurveFitFailed                           |
| tnpA-01     | 13C |       |       |      | LowEfficiency, CtIsSmall, S <sub>e</sub> |
| tnpA-02     | 13C | 33.23 | 79.29 | 1.86 |                                          |
| tnpA-03     | 13C | 31.36 | 77.59 | 2.08 |                                          |
| tnpA-04     | 13C |       |       |      | NoAmplification                          |
| tnpA-05     | 13C |       |       |      | LowEfficiency, CtIsSmall, C <sub>i</sub> |
| tnpA-07     | 13C |       |       |      | LowEfficiency, CtIsSmall, S <sub>e</sub> |
| tolC-01     | 13C |       |       |      | CurveFitFailed                           |
| tolC-02     | 13C | 29.11 | 83.59 | 1.97 | MultipleMeltPeaks                        |
| tolC-03     | 13C | 29.45 | 84.17 | 1.97 | MultipleMeltPeaks                        |
| Tp614       | 13C | 30.67 | 83.41 | 1.97 |                                          |
| ttgA        | 13C |       |       |      | CurveFitFailed                           |
| ttgB        | 13C | 36.94 | 79.11 | 1.85 |                                          |
| vanA        | 13C |       |       |      | NoAmplification                          |
| vanB-01     | 13C | 33.2  | 83.1  | 1.96 |                                          |
| vanC-01     | 13C | 31.36 | 74.18 | 2.16 |                                          |
| vanC-02     | 13C |       |       |      | LowEfficiency, CtIsSmall, C <sub>i</sub> |
| vanC-03     | 13C | 27.3  | 85.92 | 1.97 | MultipleMeltPeaks                        |
| vanC1       | 13C |       |       |      | CurveFitFailed                           |
| vanC2/vanC3 | 13C | 31.77 | 80.61 | 1.84 |                                          |
| vanG        | 13C |       |       |      | LowEfficiency, CtIsSmall, C <sub>i</sub> |
| vanHB       | 13C |       |       |      | CtIsLarge, CurveFitFailed                |
| vanHD       | 13C | 40.78 | 82.84 | 1.78 | MultipleMeltPeaks                        |
| vanRA-01    | 13C |       |       |      | LowEfficiency, CtIsSmall, C <sub>i</sub> |
| vanRA-02    | 13C |       |       |      | LowEfficiency, CtIsSmall, C <sub>i</sub> |
| vanRB       | 13C | 30.71 | 85.54 | 2.05 |                                          |
| vanRC       | 13C |       |       |      | LowEfficiency, CtIsSmall, S <sub>e</sub> |
| vanRC4      | 13C |       |       |      | LowEfficiency, CtIsSmall, S <sub>e</sub> |
| vanRD       | 13C |       |       |      | LowEfficiency, CtIsSmall, C <sub>i</sub> |
| vanSA       | 13C |       |       |      | CurveFitFailed                           |
| vanSB       | 13C | 27.18 | 74.91 | 2.05 |                                          |
| vanSC-01    | 13C | 32.38 | 83.89 | 2.02 |                                          |
| vanSC-02    | 13C |       |       |      | NoAmplification                          |
| vanTC-01    | 13C |       |       |      | LowEfficiency, CtIsSmall, S <sub>e</sub> |
| vanTC-02    | 13C |       |       |      | CurveFitFailed                           |
| vanTE       | 13C | 37.75 | 77.99 | 1.7  | MultipleMeltPeaks                        |
| vanTG       | 13C |       |       |      | CurveFitFailed                           |
| vanWB       | 13C |       |       |      | NoAmplification                          |
| vanWG       | 13C |       |       |      | CurveFitFailed                           |
| vanXA       | 13C |       |       |      | NoAmplification                          |
| vanXB       | 13C |       |       |      | NoAmplification                          |
| vanXD       | 13C | 28.12 | 75.51 | 2.06 |                                          |

|              |     |       |       |      |                              |
|--------------|-----|-------|-------|------|------------------------------|
| vanYB        | 13C | 36.98 | 85.01 | 1.81 |                              |
| vanYD-01     | 13C | 31.06 | 88.47 | 1.94 | MultipleMeltPeaks            |
| vanYD-02     | 13C |       |       |      | LowEfficiency, CtIsSmall, S: |
| vatB-01      | 13C |       |       |      | NoAmplification              |
| vatB-02      | 13C |       |       |      | CurveFitFailed               |
| vatC-01      | 13C | 33.13 | 74.06 | 1.99 | MultipleMeltPeaks            |
| vatC-02      | 13C |       |       |      | CurveFitFailed               |
| vatE-01      | 13C | 28.13 | 77.46 | 2.12 |                              |
| vatE-02      | 13C |       |       |      | NoAmplification              |
| vgaA-01      | 13C |       |       |      | CurveFitFailed               |
| vgaA-02      | 13C |       |       |      | CurveFitFailed               |
| vgb-01       | 13C | 32.78 | 87.66 | 1.89 |                              |
| vgbB-01      | 13C |       |       |      | CurveFitFailed               |
| vgbB-02      | 13C |       |       |      | CurveFitFailed               |
| yceE/mdtG-0  | 13C |       |       |      | LowEfficiency, CtIsSmall, S: |
| yceE/mdtG-0  | 13C |       |       |      | CurveFitFailed               |
| yceL/mdtH-0  | 13C | 35.77 | 84.86 | 1.82 | MultipleMeltPeaks            |
| yceL/mdtH-0  | 13C |       |       |      | NoAmplification              |
| yceL/mdtH-0  | 13C | 33.13 | 78.04 | 1.96 | MultipleMeltPeaks            |
| yidY/mdtL-01 | 13C | 33.11 | 80.51 | 1.93 |                              |
| yidY/mdtL-02 | 13C | 35.63 | 92.37 | 1.79 | MultipleMeltPeaks            |































| Assay          | Sample | Ct | Tm    | Efficiency | flag                        |
|----------------|--------|----|-------|------------|-----------------------------|
| 16S rRNA       | 14A    |    | 12.86 | 82.08      | 1.96                        |
| aac            | 14A    |    | 32.85 | 81.84      | 1.79 MultipleMeltPeaks      |
| aac(6')-Ib(akz | 14A    |    |       |            | CurveFitFailed              |
| aac(6')-Ib(akz | 14A    |    | 36.64 | 76.91      | 1.81 MultipleMeltPeaks      |
| aac(6')-Ib(akz | 14A    |    |       |            | BadR2, LowEfficiency, CtIsS |
| aac(6')-II     | 14A    |    | 32.35 | 78.88      | 1.91 MultipleMeltPeaks      |
| aac(6')I1      | 14A    |    | 43.56 | 88.92      | 1.59 MultipleMeltPeaks      |
| aacA/aphD      | 14A    |    |       |            | NoAmplification             |
| aacC           | 14A    |    | 29.6  | 85.37      | 1.72 MultipleMeltPeaks      |
| aacC1          | 14A    |    |       |            | NoAmplification             |
| aacC2          | 14A    |    |       |            | NoAmplification             |
| aacC4          | 14A    |    | 30.47 | 89.5       | 1.9                         |
| aadA-01        | 14A    |    |       |            | CurveFitFailed              |
| aadA-02        | 14A    |    | 42.3  | 86.27      | 1.71 MultipleMeltPeaks      |
| aadA-1-01      | 14A    |    |       |            | NoAmplification             |
| aadA-1-02      | 14A    |    |       |            | CurveFitFailed              |
| aadA1          | 14A    |    | 44.38 | 76.64      | 1.93                        |
| aadA2-01       | 14A    |    | 30.54 | 80.43      | 1.92                        |
| aadA2-02       | 14A    |    |       |            | NoAmplification             |
| aadA2-03       | 14A    |    |       |            | CurveFitFailed              |
| aadA5-01       | 14A    |    |       |            | NoAmplification             |
| aadA5-02       | 14A    |    | 36.23 | 83.61      | 1.84                        |
| aadA9-01       | 14A    |    | 39.4  | 86.41      | 1.68                        |
| aadA9-02       | 14A    |    |       |            | NoAmplification             |
| aadD           | 14A    |    |       |            | CurveFitFailed              |
| aadE           | 14A    |    | 34.68 | 70.85      | 2.05                        |
| acrA-01        | 14A    |    | 34.83 | 88.65      | 1.93 MultipleMeltPeaks      |
| acrA-02        | 14A    |    | 31.03 | 87.76      | 1.91                        |
| acrA-03        | 14A    |    | 33.27 | 86.38      | 1.93                        |
| acrA-04        | 14A    |    | 32.68 | 89.86      | 1.97                        |
| acrA-05        | 14A    |    | 23.13 | 89.62      | 1.93                        |
| acrB-01        | 14A    |    |       |            | NoAmplification             |
| acrF           | 14A    |    | 36.52 | 79.22      | 1.61                        |
| acrR-01        | 14A    |    | 36.57 | 79.65      | 1.87                        |
| acrR-02        | 14A    |    | 35.66 | 83.7       | 1.86 MultipleMeltPeaks      |
| Actin          | 14A    |    | 22.8  | 86.79      | 2.01 MultipleMeltPeaks      |
| adeA           | 14A    |    |       |            | CurveFitFailed              |
| ampC-01        | 14A    |    | 29.2  | 80.72      | 1.93                        |
| ampC-02        | 14A    |    |       |            | CurveFitFailed              |
| ampC-04        | 14A    |    | 35.57 | 76.31      | 1.8 MultipleMeltPeaks       |
| ampC-05        | 14A    |    |       |            | NoAmplification             |
| ampC-06        | 14A    |    | 44.53 | 83.98      | 1.9 MultipleMeltPeaks       |
| ampC-07        | 14A    |    | 35.86 | 86.51      | 1.78 MultipleMeltPeaks      |
| ampC-09        | 14A    |    |       |            | NoAmplification             |
| ampC/blaDH     | 14A    |    | 35.93 | 89.66      | 1.63 MultipleMeltPeaks      |

|                          |     |       |       |      |                                          |
|--------------------------|-----|-------|-------|------|------------------------------------------|
| aph                      | 14A |       |       |      | LowEfficiency, CtIsSmall, S <sub>e</sub> |
| aph(2')-Id-01            | 14A |       |       |      | LowEfficiency, CtIsSmall, S <sub>e</sub> |
| aph(2')-Id-02            | 14A |       |       |      | LowEfficiency, CtIsSmall, S <sub>e</sub> |
| aph6ia                   | 14A |       |       |      | NoAmplification                          |
| aphA1(aka k <sub>z</sub> | 14A |       |       |      | LowEfficiency, CtIsSmall, S <sub>e</sub> |
| bacA-01                  | 14A |       |       |      | CurveFitFailed                           |
| bacA-02                  | 14A | 32.64 | 83.49 | 1.65 |                                          |
| BETA-globin              | 14A | 23.54 | 84.01 | 1.97 | MultipleMeltPeaks                        |
| bla-ACC-1                | 14A | 36.24 | 88.37 | 1.78 |                                          |
| bla-L1                   | 14A | 31.25 | 84.96 | 1.98 | MultipleMeltPeaks                        |
| bla1                     | 14A |       |       |      | LowEfficiency, CtIsSmall, S <sub>e</sub> |
| blaCMY                   | 14A | 31.18 | 79.92 | 1.92 |                                          |
| blaCMY2-01               | 14A | 36.6  | 74.9  | 1.89 |                                          |
| blaCMY2-02               | 14A | 32.62 | 81.63 | 1.79 | MultipleMeltPeaks                        |
| blaCTX-M-01              | 14A |       |       |      | CurveFitFailed                           |
| blaCTX-M-02              | 14A | 34.02 | 89.08 | 1.84 |                                          |
| blaCTX-M-03              | 14A | 44.39 | 83.58 | 1.96 | MultipleMeltPeaks                        |
| blaCTX-M-04              | 14A | 31.43 | 88.16 | 2.02 |                                          |
| blaCTX-M-05              | 14A | 37.35 | 74.69 | 1.51 | MultipleMeltPeaks                        |
| blaCTX-M-06              | 14A |       |       |      | NoAmplification                          |
| blaGES                   | 14A |       |       |      | NoAmplification                          |
| blaIMP-01                | 14A |       |       |      | NoAmplification                          |
| blaIMP-02                | 14A |       |       |      | LowEfficiency, CtIsSmall, S <sub>e</sub> |
| blaMOX/blaC              | 14A |       |       |      | NoAmplification                          |
| blaOCH                   | 14A |       |       |      | NoAmplification                          |
| blaOKP                   | 14A |       |       |      | NoAmplification                          |
| blaOXA1/blaC             | 14A |       |       |      | LowEfficiency, CtIsSmall, S <sub>e</sub> |
| blaOXA10-01              | 14A |       |       |      | LowEfficiency, CtIsSmall, S <sub>e</sub> |
| blaOXA10-02              | 14A |       |       |      | LowEfficiency, CtIsSmall, S <sub>e</sub> |
| blaOXY                   | 14A |       |       |      | CurveFitFailed                           |
| blaPAO                   | 14A |       |       |      | NoAmplification                          |
| blaPER                   | 14A |       |       |      | LowEfficiency, CtIsSmall, S <sub>e</sub> |
| blaPSE                   | 14A |       |       |      | NoAmplification                          |
| blaROB                   | 14A |       |       |      | CurveFitFailed                           |
| blaSFO                   | 14A | 32.34 | 88.42 | 1.71 |                                          |
| blaSHV-01                | 14A |       |       |      | CurveFitFailed                           |
| blaSHV-02                | 14A | 32.06 | 81.88 | 1.63 |                                          |
| blaTEM                   | 14A | 20.63 | 79.21 | 1.87 |                                          |
| blaTLA                   | 14A |       |       |      | LowEfficiency, CtIsSmall, S <sub>e</sub> |
| blaVEB                   | 14A |       |       |      | NoAmplification                          |
| blaVIM                   | 14A | 40.37 | 62    | 1.95 | MultipleMeltPeaks                        |
| blaZ                     | 14A |       |       |      | LowEfficiency, CtIsSmall, S <sub>e</sub> |
| carB                     | 14A | 36.29 | 84.74 | 1.83 | MultipleMeltPeaks                        |
| catA1                    | 14A |       |       |      | NoAmplification                          |
| catB3                    | 14A |       |       |      | NoAmplification                          |
| catB8                    | 14A | 38.18 | 79.8  | 1.78 |                                          |

|            |     |       |       |      |                              |
|------------|-----|-------|-------|------|------------------------------|
| ceoA       | 14A | 31.76 | 83.37 | 2.01 | MultipleMeltPeaks            |
| cepA       | 14A | 37.35 | 89.07 | 1.7  | MultipleMeltPeaks            |
| cfiA       | 14A |       |       |      | NoAmplification              |
| cfr        | 14A |       |       |      | LowEfficiency, CtIsSmall, S: |
| cfxA       | 14A | 18.88 | 77.42 | 1.92 |                              |
| cmeA       | 14A |       |       |      | CurveFitFailed               |
| cmlA1-01   | 14A | 35.61 | 90.38 | 1.91 |                              |
| cmlA1-02   | 14A | 30.9  | 88.74 | 2    |                              |
| cmr        | 14A |       |       |      | BadR2, LowEfficiency, CtIsS  |
| cmx(A)     | 14A | 31.41 | 87.28 | 1.72 |                              |
| cphA-01    | 14A | 27.74 | 88    | 1.95 |                              |
| cphA-02    | 14A | 29.46 | 81.06 | 1.86 |                              |
| dfrA1      | 14A |       |       |      | NoAmplification              |
| dfrA12     | 14A |       |       |      | CurveFitFailed               |
| emrD       | 14A | 39.06 | 83.73 | 1.8  | MultipleMeltPeaks            |
| ereA       | 14A |       |       |      | NoAmplification              |
| ereB       | 14A | 35.29 | 84.82 | 1.83 | MultipleMeltPeaks            |
| erm(34)    | 14A | 34.51 | 90.72 | 1.87 |                              |
| erm(35)    | 14A |       |       |      | LowEfficiency, CtIsSmall, S: |
| erm(36)    | 14A | 29.61 | 85.9  | 2.13 |                              |
| ermA       | 14A |       |       |      | CurveFitFailed               |
| ermA/ermTR | 14A |       |       |      | NoAmplification              |
| ermB       | 14A | 22.7  | 74.91 | 2.11 |                              |
| ermC       | 14A |       |       |      | LowEfficiency, CtIsSmall, S: |
| ermF       | 14A |       |       |      | LowEfficiency, CtIsSmall, S: |
| ermJ/ermD  | 14A |       |       |      | CurveFitFailed               |
| ermK-01    | 14A |       |       |      | LowEfficiency, CtIsSmall, S: |
| ermK-02    | 14A | 36.2  | 75.81 | 1.89 |                              |
| ermT-01    | 14A |       |       |      | LowEfficiency, CtIsSmall, S: |
| ermT-02    | 14A |       |       |      | NoAmplification              |
| ermX       | 14A | 19.72 | 83.73 | 1.86 |                              |
| ermY       | 14A |       |       |      | NoAmplification              |
| fabK       | 14A | 22.35 | 77.44 | 2.17 |                              |
| floR       | 14A |       |       |      | NoAmplification              |
| folA       | 14A |       |       |      | NoAmplification              |
| fosB       | 14A |       |       |      | LowEfficiency, CtIsSmall, S: |
| fosX       | 14A |       |       |      | CurveFitFailed               |
| fox5       | 14A | 29.25 | 85.3  | 1.79 | MultipleMeltPeaks            |
| imiR       | 14A |       |       |      | NoAmplification              |
| ImrA-01    | 14A | 41.06 | 85.11 | 1.74 | MultipleMeltPeaks            |
| intl       | 14A |       |       |      | CurveFitFailed               |
| intl1      | 14A | 21.79 | 87.23 | 1.93 | MultipleMeltPeaks            |
| IS613      | 14A | 19.46 | 79.55 | 1.77 |                              |
| lnuA-01    | 14A |       |       |      | LowEfficiency, CtIsSmall, S: |
| lnuB-01    | 14A |       |       |      | LowEfficiency, CtIsSmall, S: |
| lnuB-02    | 14A |       |       |      | LowEfficiency, CtIsSmall, Ci |

|                |     |       |       |      |                              |
|----------------|-----|-------|-------|------|------------------------------|
| lnuC           | 14A | 39.67 | 87.02 | 1.68 | MultipleMeltPeaks            |
| marR-01        | 14A | 34.36 | 80.86 | 1.9  |                              |
| matA/mel       | 14A | 14.68 | 77.69 | 2.1  |                              |
| mdet1          | 14A |       |       |      | NoAmplification              |
| mdtA           | 14A | 38.39 | 86.22 | 1.65 |                              |
| mdtE/yhiU      | 14A | 33.64 | 85.66 | 1.9  | MultipleMeltPeaks            |
| mecA           | 14A |       |       |      | LowEfficiency, CtIsSmall, S: |
| mefA           | 14A | 13.92 | 80.51 | 2.06 |                              |
| mepA           | 14A | 32.51 | 85.26 | 1.7  |                              |
| mexA           | 14A | 34.11 | 87.9  | 1.88 |                              |
| mexD           | 14A |       |       |      | CurveFitFailed               |
| mexE           | 14A | 32.6  | 87.3  | 2    |                              |
| mexF           | 14A | 27.77 | 86.81 | 1.97 |                              |
| mphA-01        | 14A | 27.6  | 89.06 | 2.01 |                              |
| mphA-02        | 14A | 27.81 | 87.5  | 1.69 |                              |
| mphB           | 14A | 35.1  | 84.9  | 1.95 |                              |
| mphC           | 14A |       |       |      | CurveFitFailed               |
| msrA-01        | 14A |       |       |      | LowEfficiency, CtIsSmall, S: |
| msrC-01        | 14A |       |       |      | NoAmplification              |
| mtrC-01        | 14A | 30.38 | 86.68 | 1.93 |                              |
| mtrC-02        | 14A |       |       |      | CurveFitFailed               |
| mtrD-02        | 14A | 29.92 | 80.92 | 2.01 |                              |
| mtrD-03        | 14A | 28.5  | 82.34 | 1.99 |                              |
| NDM1           | 14A |       |       |      | CurveFitFailed               |
| nimE           | 14A |       |       |      | NoAmplification              |
| nisB           | 14A |       |       |      | NoAmplification              |
| oleC           | 14A | 33.1  | 89.16 | 1.91 |                              |
| oprD           | 14A | 30.5  | 82.24 | 1.7  |                              |
| oprJ           | 14A | 29.23 | 87.99 | 1.9  | MultipleMeltPeaks            |
| pbp            | 14A |       |       |      | LowEfficiency, CtIsSmall, S: |
| pbp2x          | 14A | 19.25 | 75.12 | 1.81 |                              |
| Pbp5           | 14A |       |       |      | LowEfficiency, CtIsSmall, S: |
| penA           | 14A | 35.56 | 90.98 | 1.7  |                              |
| pikR1          | 14A | 32.39 | 88.77 | 1.95 |                              |
| pikR2          | 14A | 33.12 | 85.59 | 1.71 |                              |
| pmrA           | 14A | 18.87 | 79.36 | 2.05 |                              |
| pncA           | 14A | 26.84 | 89.13 | 1.93 |                              |
| putative multi | 14A | 38.76 | 77.1  | 1.77 | MultipleMeltPeaks            |
| qac            | 14A |       |       |      | LowEfficiency, CtIsSmall, S: |
| qacA           | 14A | 32.96 | 70.48 | 1.73 |                              |
| qacA/qacB      | 14A |       |       |      | NoAmplification              |
| qacEdelta1-0   | 14A |       |       |      | NoAmplification              |
| qacEdelta1-0   | 14A | 33.26 | 86.4  | 1.98 |                              |
| qacH-01        | 14A | 31.77 | 88.47 | 1.97 |                              |
| qacH-02        | 14A |       |       |      | NoAmplification              |
| qnrA           | 14A |       |       |      | NoAmplification              |



|              |     |       |       |      |                              |
|--------------|-----|-------|-------|------|------------------------------|
| rarD-02      | 14A | 43.03 | 82.75 | 1.88 |                              |
| sat4         | 14A |       |       |      | NoAmplification              |
| sdeB         | 14A |       |       |      | LowEfficiency, CtIsSmall, S: |
| spcN-01      | 14A |       |       |      | NoAmplification              |
| speA         | 14A |       |       |      | NoAmplification              |
| str          | 14A |       |       |      | NoAmplification              |
| strA         | 14A |       |       |      | LowEfficiency, CtIsSmall, S: |
| strB         | 14A | 41.03 | 78.68 | 1.83 |                              |
| sul1         | 14A |       |       |      | NoAmplification              |
| sul2         | 14A | 33.93 | 89.87 | 1.93 |                              |
| sulA/foIP-01 | 14A | 18.59 | 81.15 | 1.96 |                              |
| sulA/foIP-03 | 14A | 16.79 | 83.48 | 2.08 |                              |
| tet(32)      | 14A | 21.5  | 81.31 | 2.03 |                              |
| tet(34)      | 14A | 29.46 | 75.93 | 2.01 |                              |
| tet(35)      | 14A |       |       |      | NoAmplification              |
| tet(36)-A    | 14A |       |       |      | CurveFitFailed               |
| tet(36)-B    | 14A |       |       |      | LowEfficiency, CtIsSmall, C: |
| tet(37)      | 14A | 27.39 | 88.68 | 1.99 |                              |
| tetA-01      | 14A | 29.65 | 85.13 | 1.94 |                              |
| tetA-02      | 14A | 33.72 | 88.73 | 1.91 |                              |
| tetB-01      | 14A | 40.03 | 82.27 | 1.74 | MultipleMeltPeaks            |
| tetB-02      | 14A |       |       |      | CurveFitFailed               |
| tetC-01      | 14A |       |       |      | NoAmplification              |
| tetC-02      | 14A |       |       |      | LowEfficiency, CtIsSmall, S: |
| tetD-01      | 14A |       |       |      | LowEfficiency, CtIsSmall, S: |
| tetD-02      | 14A | 33.37 | 79.86 | 2.03 |                              |
| tetE         | 14A |       |       |      | NoAmplification              |
| tetG-01      | 14A | 34.54 | 85.93 | 1.92 | MultipleMeltPeaks            |
| tetG-02      | 14A | 30.84 | 89.14 | 1.97 |                              |
| tetH         | 14A |       |       |      | NoAmplification              |
| tetJ         | 14A |       |       |      | CurveFitFailed               |
| tetK         | 14A |       |       |      | NoAmplification              |
| tetL-01      | 14A |       |       |      | NoAmplification              |
| tetL-02      | 14A | 34.8  | 83.12 | 1.98 | MultipleMeltPeaks            |
| tetM-01      | 14A | 17.16 | 75.84 | 2.04 |                              |
| tetM-02      | 14A | 16.63 | 77.35 | 2.09 |                              |
| tetO-01      | 14A | 20.86 | 76.86 | 2.06 |                              |
| tetPA        | 14A |       |       |      | NoAmplification              |
| tetPB-01     | 14A | 37.12 | 79.75 | 1.84 |                              |
| tetPB-02     | 14A | 30.39 | 85.68 | 2.05 | MultipleMeltPeaks            |
| tetPB-03     | 14A |       |       |      | LowEfficiency, CtIsSmall, S: |
| tetPB-05     | 14A |       |       |      | CurveFitFailed               |
| tetQ         | 14A | 21.97 | 76.23 | 2.1  |                              |
| tetR-02      | 14A | 30    | 86.2  | 1.86 |                              |
| tetR-03      | 14A |       |       |      | NoAmplification              |
| tetS         | 14A | 31.83 | 87.09 | 2    |                              |

|             |     |       |       |      |                             |
|-------------|-----|-------|-------|------|-----------------------------|
| tetT        | 14A |       |       |      | NoAmplification             |
| tetU-01     | 14A |       |       |      | NoAmplification             |
| tetV        | 14A |       |       |      | NoAmplification             |
| tetW-01     | 14A | 20.12 | 81.86 | 2.01 |                             |
| tetX        | 14A |       |       |      | LowEfficiency, CtIsSmall, C |
| tnpA-01     | 14A |       |       |      | LowEfficiency, CtIsSmall, S |
| tnpA-02     | 14A | 33.09 | 83.99 | 1.85 | MultipleMeltPeaks           |
| tnpA-03     | 14A | 32.88 | 86.06 | 1.7  |                             |
| tnpA-04     | 14A | 32.81 | 77.72 | 1.81 | MultipleMeltPeaks           |
| tnpA-05     | 14A |       |       |      | NoAmplification             |
| tnpA-07     | 14A |       |       |      | NoAmplification             |
| tolC-01     | 14A |       |       |      | CurveFitFailed              |
| tolC-02     | 14A | 30.9  | 83.51 | 1.98 | MultipleMeltPeaks           |
| tolC-03     | 14A | 29.48 | 87.93 | 1.89 |                             |
| Tp614       | 14A |       |       |      | LowEfficiency, CtIsSmall, S |
| ttgA        | 14A | 34.92 | 88.43 | 1.77 | MultipleMeltPeaks           |
| ttgB        | 14A |       |       |      | CurveFitFailed              |
| vanA        | 14A |       |       |      | NoAmplification             |
| vanB-01     | 14A | 33.6  | 78.73 | 1.68 |                             |
| vanC-01     | 14A | 34.96 | 73.33 | 2.09 |                             |
| vanC-02     | 14A |       |       |      | LowEfficiency, CtIsSmall, S |
| vanC-03     | 14A | 23.4  | 85.9  | 1.99 |                             |
| vanC1       | 14A |       |       |      | NoAmplification             |
| vanC2/vanC3 | 14A | 32.47 | 77.61 | 2.09 |                             |
| vanG        | 14A |       |       |      | NoAmplification             |
| vanHB       | 14A | 34.15 | 82.7  | 1.88 | MultipleMeltPeaks           |
| vanHD       | 14A | 31.12 | 89.51 | 1.98 |                             |
| vanRA-01    | 14A | 42.26 | 63.68 | 1.65 | MultipleMeltPeaks           |
| vanRA-02    | 14A |       |       |      | NoAmplification             |
| vanRB       | 14A | 28.97 | 89.17 | 2.1  |                             |
| vanRC       | 14A |       |       |      | LowEfficiency, CtIsSmall, S |
| vanRC4      | 14A |       |       |      | LowEfficiency, CtIsSmall, S |
| vanRD       | 14A |       |       |      | NoAmplification             |
| vanSA       | 14A |       |       |      | LowEfficiency, CtIsSmall, C |
| vanSB       | 14A | 26.98 | 74.77 | 2.07 |                             |
| vanSC-01    | 14A | 33.63 | 77.63 | 2.06 | MultipleMeltPeaks           |
| vanSC-02    | 14A |       |       |      | NoAmplification             |
| vanTC-01    | 14A |       |       |      | CurveFitFailed              |
| vanTC-02    | 14A | 31.67 | 86.37 | 1.88 |                             |
| vanTE       | 14A |       |       |      | NoAmplification             |
| vanTG       | 14A |       |       |      | NoAmplification             |
| vanWB       | 14A |       |       |      | LowEfficiency, CtIsSmall, S |
| vanWG       | 14A | 33.56 | 74.63 | 1.99 |                             |
| vanXA       | 14A | 32.92 | 82.9  | 1.87 |                             |
| vanXB       | 14A |       |       |      | NoAmplification             |
| vanXD       | 14A | 28.61 | 75.4  | 2.11 |                             |

|              |     |       |       |      |                             |
|--------------|-----|-------|-------|------|-----------------------------|
| vanYB        | 14A | 35.39 | 82.8  | 1.88 | MultipleMeltPeaks           |
| vanYD-01     | 14A | 28    | 88.76 | 1.89 |                             |
| vanYD-02     | 14A |       |       |      | NoAmplification             |
| vatB-01      | 14A |       |       |      | NoAmplification             |
| vatB-02      | 14A | 33.94 | 83.71 | 1.98 |                             |
| vatC-01      | 14A | 35.75 | 81.78 | 1.83 | MultipleMeltPeaks           |
| vatC-02      | 14A | 34.02 | 89.76 | 1.91 |                             |
| vatE-01      | 14A | 29.09 | 77.33 | 2.08 |                             |
| vatE-02      | 14A |       |       |      | NoAmplification             |
| vgaA-01      | 14A |       |       |      | CurveFitFailed              |
| vgaA-02      | 14A |       |       |      | LowEfficiency, CtIsSmall, S |
| vgb-01       | 14A | 33.71 | 83.06 | 1.88 |                             |
| vgbB-01      | 14A |       |       |      | NoAmplification             |
| vgbB-02      | 14A |       |       |      | NoAmplification             |
| yceE/mdtG-0  | 14A |       |       |      | BadR2, LowEfficiency, CtIsS |
| yceE/mdtG-0  | 14A |       |       |      | NoAmplification             |
| yceL/mdtH-0  | 14A | 26.36 | 79.42 | 1.94 | MultipleMeltPeaks           |
| yceL/mdtH-0  | 14A |       |       |      | LowEfficiency, CtIsSmall, C |
| yceL/mdtH-0  | 14A | 37.48 | 89.6  | 1.64 | MultipleMeltPeaks           |
| yidY/mdtL-01 | 14A | 32.19 | 77.25 | 1.95 | MultipleMeltPeaks           |
| yidY/mdtL-02 | 14A | 37.61 | 74.71 | 1.85 |                             |































| Assay          | Sample | Ct    | Tm    | Efficiency | flag                         |
|----------------|--------|-------|-------|------------|------------------------------|
| 16S rRNA       | 14B    |       | 14.28 | 81.49      | 2                            |
| aac            | 14B    |       |       |            | CurveFitFailed               |
| aac(6')-Ib(akz | 14B    | 32.87 | 84.91 | 2.1        |                              |
| aac(6')-Ib(akz | 14B    | 34.68 | 78.91 | 2.08       | MultipleMeltPeaks            |
| aac(6')-Ib(akz | 14B    | 33.24 | 87.15 | 2.28       | MultipleMeltPeaks            |
| aac(6')-II     | 14B    | 33.2  | 80.7  | 1.84       | MultipleMeltPeaks            |
| aac(6')I1      | 14B    |       |       |            | NoAmplification              |
| aacA/aphD      | 14B    |       |       |            | NoAmplification              |
| aacC           | 14B    | 30.33 | 88.77 | 1.9        | MultipleMeltPeaks            |
| aacC1          | 14B    |       |       |            | NoAmplification              |
| aacC2          | 14B    |       |       |            | CurveFitFailed               |
| aacC4          | 14B    | 33.6  | 83.42 | 2.17       | BadR2, MultipleMeltPeaks     |
| aadA-01        | 14B    |       |       |            | NoAmplification              |
| aadA-02        | 14B    |       |       |            | CtIsSmall, CurveFitFailed, F |
| aadA-1-01      | 14B    | 34.19 | 81.25 | 2.05       |                              |
| aadA-1-02      | 14B    |       |       |            | NoAmplification              |
| aadA1          | 14B    | 30.28 | 83.27 | 1.96       |                              |
| aadA2-01       | 14B    |       |       |            | CtIsSmall, CurveFitFailed, F |
| aadA2-02       | 14B    | 31.59 | 74.97 | 2.21       |                              |
| aadA2-03       | 14B    |       |       |            | NoAmplification              |
| aadA5-01       | 14B    | 33.45 | 77.91 | 1.94       | MultipleMeltPeaks            |
| aadA5-02       | 14B    | 31.68 | 88.2  | 2.02       |                              |
| aadA9-01       | 14B    | 33.82 | 83.88 | 2.12       | MultipleMeltPeaks            |
| aadA9-02       | 14B    |       |       |            | NoAmplification              |
| aadD           | 14B    |       |       |            | NoAmplification              |
| aadE           | 14B    |       |       |            | NoAmplification              |
| acrA-01        | 14B    | 31.16 | 88.71 | 1.97       |                              |
| acrA-02        | 14B    | 33.46 | 81.08 | 2          |                              |
| acrA-03        | 14B    |       |       |            | BadR2, LowEfficiency, CtIsS  |
| acrA-04        | 14B    | 30.55 | 80.36 | 1.79       |                              |
| acrA-05        | 14B    | 32.72 | 86.84 | 2.07       |                              |
| acrB-01        | 14B    |       |       |            | NoAmplification              |
| acrF           | 14B    | 31.83 | 84.61 | 1.92       |                              |
| acrR-01        | 14B    |       |       |            | CtIsSmall, CurveFitFailed, F |
| acrR-02        | 14B    |       |       |            | CurveFitFailed               |
| Actin          | 14B    | 19.09 | 87.11 | 2.02       |                              |
| adeA           | 14B    |       |       |            | NoAmplification              |
| ampC-01        | 14B    | 31.95 | 85.26 | 2.14       | MultipleMeltPeaks            |
| ampC-02        | 14B    |       |       |            | LowEfficiency, CtIsSmall, Ci |
| ampC-04        | 14B    | 32.14 | 79.07 | 1.88       |                              |
| ampC-05        | 14B    |       |       |            | NoAmplification              |
| ampC-06        | 14B    |       |       |            | CurveFitFailed               |
| ampC-07        | 14B    | 33.83 | 88.26 | 2.1        |                              |
| ampC-09        | 14B    |       |       |            | NoAmplification              |
| ampC/blaDH     | 14B    | 31    | 85.75 | 1.89       | MultipleMeltPeaks            |

|                          |     |       |       |      |                              |
|--------------------------|-----|-------|-------|------|------------------------------|
| aph                      | 14B |       |       |      | NoAmplification              |
| aph(2')-Id-01            | 14B |       |       |      | LowEfficiency, CtIsSmall, C  |
| aph(2')-Id-02            | 14B |       |       |      | NoAmplification              |
| aph6ia                   | 14B |       |       |      | NoAmplification              |
| aphA1(aka k <sub>z</sub> | 14B |       |       |      | LowEfficiency, CtIsSmall, C  |
| bacA-01                  | 14B |       |       |      | NoAmplification              |
| bacA-02                  | 14B | 32.25 | 83.51 | 1.96 | MultipleMeltPeaks            |
| BETA-globin              | 14B | 19.78 | 84.13 | 2.09 |                              |
| bla-ACC-1                | 14B | 33.67 | 86.02 | 2.14 |                              |
| bla-L1                   | 14B | 32.23 | 83.83 | 2.2  |                              |
| bla1                     | 14B |       |       |      | NoAmplification              |
| blaCMY                   | 14B |       |       |      | BadR2, LowEfficiency, CtIsS  |
| blaCMY2-01               | 14B |       |       |      | CtIsSmall, CurveFitFailed, F |
| blaCMY2-02               | 14B | 29.1  | 82.95 | 1.87 | MultipleMeltPeaks            |
| blaCTX-M-01              | 14B |       |       |      | NoAmplification              |
| blaCTX-M-02              | 14B | 31.46 | 78.53 | 2    |                              |
| blaCTX-M-03              | 14B |       |       |      | CtIsSmall, CurveFitFailed, F |
| blaCTX-M-04              | 14B | 31.1  | 90.41 | 1.9  | MultipleMeltPeaks            |
| blaCTX-M-05              | 14B | 34.08 | 75.93 | 1.98 |                              |
| blaCTX-M-06              | 14B |       |       |      | NoAmplification              |
| blaGES                   | 14B |       |       |      | NoAmplification              |
| blaIMP-01                | 14B |       |       |      | NoAmplification              |
| blaIMP-02                | 14B |       |       |      | NoAmplification              |
| blaMOX/blaC              | 14B |       |       |      | BadR2, LowEfficiency, CtIsS  |
| blaOCH                   | 14B |       |       |      | NoAmplification              |
| blaOKP                   | 14B |       |       |      | NoAmplification              |
| blaOXA1/blaC             | 14B |       |       |      | NoAmplification              |
| blaOXA10-01              | 14B |       |       |      | NoAmplification              |
| blaOXA10-02              | 14B |       |       |      | NoAmplification              |
| blaOXY                   | 14B |       |       |      | CurveFitFailed               |
| blaPAO                   | 14B |       |       |      | NoAmplification              |
| blaPER                   | 14B |       |       |      | NoAmplification              |
| blaPSE                   | 14B |       |       |      | NoAmplification              |
| blaROB                   | 14B |       |       |      | NoAmplification              |
| blaSFO                   | 14B | 31.85 | 87.36 | 2.14 | MultipleMeltPeaks            |
| blaSHV-01                | 14B |       |       |      | NoAmplification              |
| blaSHV-02                | 14B |       |       |      | NoAmplification              |
| blaTEM                   | 14B | 25.6  | 79.09 | 1.99 |                              |
| blaTLA                   | 14B |       |       |      | NoAmplification              |
| blaVEB                   | 14B |       |       |      | NoAmplification              |
| blaVIM                   | 14B | 34.47 | 88.86 | 2.06 |                              |
| blaZ                     | 14B |       |       |      | NoAmplification              |
| carB                     | 14B |       |       |      | NoAmplification              |
| catA1                    | 14B |       |       |      | NoAmplification              |
| catB3                    | 14B |       |       |      | NoAmplification              |
| catB8                    | 14B | 32.6  | 81.43 | 2.15 | MultipleMeltPeaks            |

|            |     |       |       |      |                              |
|------------|-----|-------|-------|------|------------------------------|
| ceoA       | 14B | 28.84 | 82.32 | 1.86 | MultipleMeltPeaks            |
| cepA       | 14B |       |       |      | NoAmplification              |
| cfiA       | 14B | 33.47 | 87.41 | 2.07 | BadR2, MultipleMeltPeaks     |
| cfr        | 14B |       |       |      | NoAmplification              |
| cfxA       | 14B | 21.26 | 77.31 | 1.9  |                              |
| cmeA       | 14B |       |       |      | CtIsSmall, CurveFitFailed, F |
| cmlA1-01   | 14B | 34.27 | 88.81 | 2.11 | BadR2                        |
| cmlA1-02   | 14B |       |       |      | LowEfficiency, CtIsSmall, Ci |
| cmr        | 14B |       |       |      | NoAmplification              |
| cmx(A)     | 14B | 27.38 | 84.6  | 1.94 | MultipleMeltPeaks            |
| cphA-01    | 14B | 33.44 | 85.75 | 2.12 |                              |
| cphA-02    | 14B |       |       |      | BadR2, LowEfficiency, CtIsS  |
| dfrA1      | 14B |       |       |      | NoAmplification              |
| dfrA12     | 14B |       |       |      | LowEfficiency, CtIsSmall, S  |
| emrD       | 14B |       |       |      | NoAmplification              |
| ereA       | 14B | 33.86 | 82.28 | 2.16 |                              |
| ereB       | 14B |       |       |      | BadR2, LowEfficiency, CtIsS  |
| erm(34)    | 14B |       |       |      | NoAmplification              |
| erm(35)    | 14B |       |       |      | NoAmplification              |
| erm(36)    | 14B |       |       |      | CtIsSmall, CurveFitFailed, F |
| ermA       | 14B |       |       |      | CurveFitFailed               |
| ermA/ermTR | 14B |       |       |      | NoAmplification              |
| ermB       | 14B |       |       |      | NoAmplification              |
| ermC       | 14B |       |       |      | NoAmplification              |
| ermF       | 14B |       |       |      | LowEfficiency, CtIsSmall, Ci |
| ermJ/ermD  | 14B |       |       |      | NoAmplification              |
| ermK-01    | 14B |       |       |      | BadR2, LowEfficiency, CtIsS  |
| ermK-02    | 14B |       |       |      | CurveFitFailed               |
| ermT-01    | 14B |       |       |      | LowEfficiency, CtIsSmall, Ci |
| ermT-02    | 14B |       |       |      | NoAmplification              |
| ermX       | 14B |       |       |      | CtIsSmall, SaturationBaseli  |
| ermY       | 14B |       |       |      | NoAmplification              |
| fabK       | 14B |       |       |      | CurveFitFailed               |
| floR       | 14B |       |       |      | NoAmplification              |
| folA       | 14B |       |       |      | NoAmplification              |
| fosB       | 14B |       |       |      | LowEfficiency, CtIsSmall, Ci |
| fosX       | 14B |       |       |      | LowEfficiency, CtIsSmall, Ci |
| fox5       | 14B | 26.79 | 86.73 | 1.92 |                              |
| imiR       | 14B |       |       |      | NoAmplification              |
| ImrA-01    | 14B |       |       |      | BadR2, LowEfficiency, CtIsS  |
| intl       | 14B | 32.08 | 88.41 | 2.05 | MultipleMeltPeaks            |
| intl1      | 14B | 20.74 | 87.29 | 2.33 |                              |
| IS613      | 14B |       |       |      | CurveFitFailed               |
| lnuA-01    | 14B |       |       |      | NoAmplification              |
| lnuB-01    | 14B |       |       |      | NoAmplification              |
| lnuB-02    | 14B |       |       |      | LowEfficiency, CtIsSmall, Ci |

|               |     |       |       |      |                              |
|---------------|-----|-------|-------|------|------------------------------|
| lnuC          | 14B |       |       |      | CtIsSmall, CurveFitFailed, F |
| marR-01       | 14B |       |       |      | CurveFitFailed               |
| matA/mel      | 14B | 19.71 | 77.34 | 2.15 |                              |
| mdet1         | 14B |       |       |      | NoAmplification              |
| mdtA          | 14B |       |       |      | NoAmplification              |
| mdtE/yhiU     | 14B |       |       |      | LowEfficiency, CtIsSmall, Ci |
| mecA          | 14B |       |       |      | NoAmplification              |
| mefA          | 14B | 19.39 | 80.42 | 2.09 |                              |
| mepA          | 14B |       |       |      | BadR2, CtIsSmall, CurveFitF  |
| mexA          | 14B |       |       |      | CtIsSmall, CurveFitFailed, F |
| mexD          | 14B |       |       |      | NoAmplification              |
| mexE          | 14B |       |       |      | LowEfficiency, CtIsSmall, S: |
| mexF          | 14B |       |       |      | CurveFitFailed               |
| mphA-01       | 14B | 31.45 | 86.7  | 1.89 | MultipleMeltPeaks            |
| mphA-02       | 14B | 30.2  | 86.89 | 1.5  | BadR2, MultipleMeltPeaks     |
| mphB          | 14B |       |       |      | CtIsSmall, CurveFitFailed, F |
| mphC          | 14B |       |       |      | NoAmplification              |
| msrA-01       | 14B |       |       |      | LowEfficiency, CtIsSmall, Ci |
| msrC-01       | 14B |       |       |      | NoAmplification              |
| mtrC-01       | 14B |       |       |      | NoAmplification              |
| mtrC-02       | 14B |       |       |      | LowEfficiency, CtIsSmall, S: |
| mtrD-02       | 14B | 27.78 | 80.93 | 1.81 |                              |
| mtrD-03       | 14B | 32.87 | 82.75 | 2.21 |                              |
| NDM1          | 14B |       |       |      | NoAmplification              |
| nimE          | 14B |       |       |      | NoAmplification              |
| nisB          | 14B |       |       |      | NoAmplification              |
| oleC          | 14B |       |       |      | BadR2, LowEfficiency, CtIsS  |
| oprD          | 14B | 27.92 | 86.69 | 2.01 |                              |
| oprJ          | 14B | 30.7  | 91.7  | 2.05 |                              |
| pbp           | 14B |       |       |      | NoAmplification              |
| pbp2x         | 14B |       |       |      | NoAmplification              |
| Pbp5          | 14B |       |       |      | NoAmplification              |
| penA          | 14B | 34.18 | 85.65 | 1.95 |                              |
| pikR1         | 14B |       |       |      | NoAmplification              |
| pikR2         | 14B |       |       |      | CurveFitFailed               |
| pmrA          | 14B | 22.87 | 79.54 | 1.99 |                              |
| pncA          | 14B | 28.21 | 89.84 | 1.76 |                              |
| putative mult | 14B |       |       |      | CtIsSmall, CurveFitFailed, F |
| qac           | 14B |       |       |      | NoAmplification              |
| qacA          | 14B |       |       |      | NoAmplification              |
| qacA/qacB     | 14B |       |       |      | NoAmplification              |
| qacEdelta1-0  | 14B |       |       |      | NoAmplification              |
| qacEdelta1-0  | 14B |       |       |      | CtIsSmall, SaturationBaseli  |
| qacH-01       | 14B | 31.53 | 86.18 | 2.26 | MultipleMeltPeaks            |
| qacH-02       | 14B |       |       |      | LowEfficiency, CtIsSmall, S: |
| qnrA          | 14B |       |       |      | NoAmplification              |

|              |     |       |       |      |                              |
|--------------|-----|-------|-------|------|------------------------------|
| rarD-02      | 14B |       |       |      | NoAmplification              |
| sat4         | 14B |       |       |      | NoAmplification              |
| sdeB         | 14B |       |       |      | LowEfficiency, CtIsSmall, Ci |
| spcN-01      | 14B |       |       |      | CtIsSmall, CurveFitFailed, F |
| speA         | 14B |       |       |      | NoAmplification              |
| str          | 14B |       |       |      | NoAmplification              |
| strA         | 14B |       |       |      | NoAmplification              |
| strB         | 14B |       |       |      | NoAmplification              |
| sul1         | 14B | 33.92 | 85.96 | 2.05 | BadR2, MultipleMeltPeaks     |
| sul2         | 14B |       |       |      | CtIsSmall, SaturationBaseli  |
| sulA/foIP-01 | 14B | 21.02 | 81.08 | 2.33 |                              |
| sulA/foIP-03 | 14B | 20.86 | 83.18 | 2.2  |                              |
| tet(32)      | 14B | 26.52 | 81.22 | 1.88 |                              |
| tet(34)      | 14B | 31.84 | 75.22 | 2.09 |                              |
| tet(35)      | 14B |       |       |      | NoAmplification              |
| tet(36)-A    | 14B |       |       |      | NoAmplification              |
| tet(36)-B    | 14B |       |       |      | NoAmplification              |
| tet(37)      | 14B | 25.28 | 75.96 | 1.97 | MultipleMeltPeaks            |
| tetA-01      | 14B | 32.28 | 85.05 | 2.13 |                              |
| tetA-02      | 14B |       |       |      | CtIsSmall, CurveFitFailed, F |
| tetB-01      | 14B | 25.61 | 79.35 | 1.92 | MultipleMeltPeaks            |
| tetB-02      | 14B | 25.92 | 79.48 | 2.1  |                              |
| tetC-01      | 14B | 25.52 | 74.78 | 1.98 |                              |
| tetC-02      | 14B | 26.85 | 75.62 | 2.02 |                              |
| tetD-01      | 14B |       |       |      | CurveFitFailed               |
| tetD-02      | 14B |       |       |      | CtIsSmall, CurveFitFailed, F |
| tetE         | 14B | 31.81 | 86.08 | 2.18 |                              |
| tetG-01      | 14B | 33.28 | 82.18 | 2.33 | MultipleMeltPeaks            |
| tetG-02      | 14B | 33.65 | 85.03 | 2.21 |                              |
| tetH         | 14B |       |       |      | CurveFitFailed               |
| tetJ         | 14B |       |       |      | LowEfficiency, CtIsSmall, Ci |
| tetK         | 14B |       |       |      | LowEfficiency, CtIsSmall, Ci |
| tetL-01      | 14B |       |       |      | CtIsSmall, CurveFitFailed, F |
| tetL-02      | 14B | 30.65 | 85.16 | 1.81 |                              |
| tetM-01      | 14B | 22.17 | 75.6  | 2.16 |                              |
| tetM-02      | 14B | 22.33 | 77.31 | 2.31 |                              |
| tetO-01      | 14B | 24.26 | 76.5  | 2.05 |                              |
| tetPA        | 14B |       |       |      | NoAmplification              |
| tetPB-01     | 14B | 34.53 | 83.09 | 2.12 | MultipleMeltPeaks            |
| tetPB-02     | 14B | 27.67 | 84.78 | 1.95 |                              |
| tetPB-03     | 14B |       |       |      | NoAmplification              |
| tetPB-05     | 14B |       |       |      | LowEfficiency, CtIsSmall, Ci |
| tetQ         | 14B | 23.19 | 77.22 | 1.86 |                              |
| tetR-02      | 14B | 31.05 | 87.53 | 1.91 |                              |
| tetR-03      | 14B | 26.33 | 75.77 | 1.96 |                              |
| tetS         | 14B |       |       |      | CtIsSmall, CurveFitFailed, F |

|             |     |       |       |      |                              |
|-------------|-----|-------|-------|------|------------------------------|
| tetT        | 14B |       |       |      | NoAmplification              |
| tetU-01     | 14B |       |       |      | NoAmplification              |
| tetV        | 14B |       |       |      | NoAmplification              |
| tetW-01     | 14B |       |       |      | NoAmplification              |
| tetX        | 14B |       |       |      | BadR2, CtIsSmall, Saturatio  |
| tnpA-01     | 14B |       |       |      | NoAmplification              |
| tnpA-02     | 14B |       |       |      | NoAmplification              |
| tnpA-03     | 14B | 23.93 | 77.19 | 1.93 |                              |
| tnpA-04     | 14B |       |       |      | NoAmplification              |
| tnpA-05     | 14B |       |       |      | NoAmplification              |
| tnpA-07     | 14B |       |       |      | NoAmplification              |
| tolC-01     | 14B |       |       |      | LowEfficiency, CtIsSmall, Se |
| tolC-02     | 14B | 32.31 | 87.86 | 2.16 |                              |
| tolC-03     | 14B | 31.2  | 86.43 | 2.03 |                              |
| Tp614       | 14B |       |       |      | NoAmplification              |
| ttgA        | 14B |       |       |      | NoAmplification              |
| ttgB        | 14B | 33.88 | 87.95 | 2.12 | MultipleMeltPeaks            |
| vanA        | 14B |       |       |      | NoAmplification              |
| vanB-01     | 14B |       |       |      | CurveFitFailed               |
| vanC-01     | 14B |       |       |      | CurveFitFailed               |
| vanC-02     | 14B |       |       |      | NoAmplification              |
| vanC-03     | 14B | 26.81 | 86.35 | 1.98 | MultipleMeltPeaks            |
| vanC1       | 14B |       |       |      | NoAmplification              |
| vanC2/vanC3 | 14B |       |       |      | CtIsSmall, CurveFitFailed, F |
| vanG        | 14B |       |       |      | CtIsSmall, SaturationBaseli  |
| vanHB       | 14B |       |       |      | CtIsSmall, CurveFitFailed, F |
| vanHD       | 14B |       |       |      | NoAmplification              |
| vanRA-01    | 14B |       |       |      | NoAmplification              |
| vanRA-02    | 14B |       |       |      | NoAmplification              |
| vanRB       | 14B |       |       |      | CtIsSmall, CurveFitFailed, F |
| vanRC       | 14B |       |       |      | NoAmplification              |
| vanRC4      | 14B |       |       |      | LowEfficiency, CtIsSmall, Ci |
| vanRD       | 14B |       |       |      | CurveFitFailed               |
| vanSA       | 14B |       |       |      | NoAmplification              |
| vanSB       | 14B | 30.23 | 74.06 | 1.79 |                              |
| vanSC-01    | 14B | 32.73 | 83.93 | 2.09 | MultipleMeltPeaks            |
| vanSC-02    | 14B |       |       |      | NoAmplification              |
| vanTC-01    | 14B |       |       |      | CurveFitFailed               |
| vanTC-02    | 14B |       |       |      | CtIsSmall, CurveFitFailed, F |
| vanTE       | 14B |       |       |      | CtIsSmall, CurveFitFailed, F |
| vanTG       | 14B |       |       |      | NoAmplification              |
| vanWB       | 14B |       |       |      | CurveFitFailed               |
| vanWG       | 14B |       |       |      | NoAmplification              |
| vanXA       | 14B |       |       |      | CurveFitFailed               |
| vanXB       | 14B |       |       |      | CtIsSmall, CurveFitFailed, F |
| vanXD       | 14B |       |       |      | LowEfficiency, CtIsSmall, Ci |

|              |     |       |       |      |                              |
|--------------|-----|-------|-------|------|------------------------------|
| vanYB        | 14B | 34.58 | 80.89 | 2.1  |                              |
| vanYD-01     | 14B | 32.11 | 82.33 | 1.83 | MultipleMeltPeaks            |
| vanYD-02     | 14B |       |       |      | NoAmplification              |
| vatB-01      | 14B |       |       |      | CtIsSmall, CurveFitFailed, F |
| vatB-02      | 14B |       |       |      | CtIsSmall, CurveFitFailed, F |
| vatC-01      | 14B |       |       |      | NoAmplification              |
| vatC-02      | 14B | 33.53 | 87.5  | 2.11 |                              |
| vatE-01      | 14B | 32.54 | 75.73 | 2.3  |                              |
| vatE-02      | 14B |       |       |      | NoAmplification              |
| vgaA-01      | 14B |       |       |      | NoAmplification              |
| vgaA-02      | 14B |       |       |      | LowEfficiency, CtIsSmall, Ci |
| vgb-01       | 14B |       |       |      | CtIsSmall, CurveFitFailed, F |
| vgbB-01      | 14B |       |       |      | NoAmplification              |
| vgbB-02      | 14B |       |       |      | NoAmplification              |
| yceE/mdtG-0  | 14B |       |       |      | NoAmplification              |
| yceE/mdtG-0  | 14B |       |       |      | NoAmplification              |
| yceL/mdtH-0  | 14B | 32.1  | 84.22 | 2.02 | MultipleMeltPeaks            |
| yceL/mdtH-0  | 14B |       |       |      | CurveFitFailed               |
| yceL/mdtH-0  | 14B |       |       |      | LowEfficiency, CtIsSmall, S: |
| yidY/mdtL-01 | 14B | 31.54 | 84.95 | 2.19 |                              |
| yidY/mdtL-02 | 14B |       |       |      | NoAmplification              |































| Assay          | Sample | Ct | Tm    | Efficiency | flag                         |
|----------------|--------|----|-------|------------|------------------------------|
| 16S rRNA       | 14C    |    | 19.32 | 82.07      | 1.95                         |
| aac            | 14C    |    | 32.11 | 85.28      | 1.64 MultipleMeltPeaks       |
| aac(6')-Ib(akz | 14C    |    |       |            | NoAmplification              |
| aac(6')-Ib(akz | 14C    |    | 31.97 | 82.42      | 1.98 MultipleMeltPeaks       |
| aac(6')-Ib(akz | 14C    |    | 36.4  | 78.8       | 1.85                         |
| aac(6')-II     | 14C    |    |       |            | CurveFitFailed               |
| aac(6')I1      | 14C    |    |       |            | NoAmplification              |
| aacA/aphD      | 14C    |    |       |            | NoAmplification              |
| aacC           | 14C    |    | 28.15 | 79.02      | 1.96                         |
| aacC1          | 14C    |    |       |            | NoAmplification              |
| aacC2          | 14C    |    |       |            | NoAmplification              |
| aacC4          | 14C    |    | 34.09 | 89.53      | 1.87                         |
| aadA-01        | 14C    |    |       |            | CurveFitFailed               |
| aadA-02        | 14C    |    | 38.29 | 80.66      | 1.77                         |
| aadA-1-01      | 14C    |    | 32.05 | 81.44      | 1.95                         |
| aadA-1-02      | 14C    |    |       |            | NoAmplification              |
| aadA1          | 14C    |    |       |            | NoAmplification              |
| aadA2-01       | 14C    |    | 33.63 | 89.97      | 1.89                         |
| aadA2-02       | 14C    |    | 35.29 | 74.8       | 1.88                         |
| aadA2-03       | 14C    |    |       |            | CurveFitFailed               |
| aadA5-01       | 14C    |    |       |            | CurveFitFailed               |
| aadA5-02       | 14C    |    | 30.52 | 87.38      | 2.01                         |
| aadA9-01       | 14C    |    | 39.22 | 81.87      | 1.63 MultipleMeltPeaks       |
| aadA9-02       | 14C    |    |       |            | NoAmplification              |
| aadD           | 14C    |    |       |            | NoAmplification              |
| aadE           | 14C    |    |       |            | NoAmplification              |
| acrA-01        | 14C    |    | 34.89 | 88.6       | 1.81                         |
| acrA-02        | 14C    |    | 35.5  | 85.9       | 1.81 MultipleMeltPeaks       |
| acrA-03        | 14C    |    |       |            | LowEfficiency, CtisSmall, S: |
| acrA-04        | 14C    |    | 31.23 | 80.04      | 2.01 MultipleMeltPeaks       |
| acrA-05        | 14C    |    | 29.02 | 88.96      | 1.94                         |
| acrB-01        | 14C    |    | 33.92 | 76.96      | 2.01                         |
| acrF           | 14C    |    | 28.81 | 83.05      | 1.75                         |
| acrR-01        | 14C    |    | 34.76 | 83.8       | 1.89                         |
| acrR-02        | 14C    |    |       |            | CurveFitFailed               |
| Actin          | 14C    |    | 23.09 | 86.8       | 1.96                         |
| adeA           | 14C    |    |       |            | NoAmplification              |
| ampC-01        | 14C    |    | 35.17 | 87.38      | 1.92 MultipleMeltPeaks       |
| ampC-02        | 14C    |    |       |            | NoAmplification              |
| ampC-04        | 14C    |    | 32.33 | 78.5       | 1.89                         |
| ampC-05        | 14C    |    |       |            | NoAmplification              |
| ampC-06        | 14C    |    |       |            | NoAmplification              |
| ampC-07        | 14C    |    | 35.68 | 88.38      | 1.77                         |
| ampC-09        | 14C    |    |       |            | NoAmplification              |
| ampC/blaDH     | 14C    |    | 32.28 | 85.13      | 1.94                         |

|                            |     |       |       |      |                          |
|----------------------------|-----|-------|-------|------|--------------------------|
| aph                        | 14C |       |       |      | NoAmplification          |
| aph(2')-Id-01              | 14C |       |       |      | NoAmplification          |
| aph(2')-Id-02              | 14C |       |       |      | NoAmplification          |
| aph6ia                     | 14C | 40.67 | 78.02 | 2.09 | BadR2, MultipleMeltPeaks |
| aphA1(aka k <sub>z</sub> ) | 14C |       |       |      | NoAmplification          |
| bacA-01                    | 14C | 39.06 | 82.49 | 1.81 |                          |
| bacA-02                    | 14C | 34.59 | 88.24 | 1.75 |                          |
| BETA-globin                | 14C | 24.72 | 83.95 | 1.97 |                          |
| bla-ACC-1                  | 14C | 34.99 | 84.13 | 1.86 | MultipleMeltPeaks        |
| bla-L1                     | 14C | 34.02 | 85.64 | 1.93 | MultipleMeltPeaks        |
| bla1                       | 14C |       |       |      | CurveFitFailed           |
| blaCMY                     | 14C | 34.26 | 79.82 | 1.93 |                          |
| blaCMY2-01                 | 14C |       |       |      | NoAmplification          |
| blaCMY2-02                 | 14C | 29.61 | 81.01 | 1.97 | MultipleMeltPeaks        |
| blaCTX-M-01                | 14C | 35.22 | 76.16 | 1.78 | MultipleMeltPeaks        |
| blaCTX-M-02                | 14C | 33.01 | 79.44 | 1.9  | MultipleMeltPeaks        |
| blaCTX-M-03                | 14C |       |       |      | NoAmplification          |
| blaCTX-M-04                | 14C | 34.74 | 89.01 | 1.92 |                          |
| blaCTX-M-05                | 14C | 32.06 | 76.77 | 1.82 |                          |
| blaCTX-M-06                | 14C |       |       |      | NoAmplification          |
| blaGES                     | 14C |       |       |      | NoAmplification          |
| blaIMP-01                  | 14C | 36.43 | 74.64 | 1.87 |                          |
| blaIMP-02                  | 14C |       |       |      | NoAmplification          |
| blaMOX/blaC                | 14C |       |       |      | NoAmplification          |
| blaOCH                     | 14C |       |       |      | NoAmplification          |
| blaOKP                     | 14C |       |       |      | NoAmplification          |
| blaOXA1/blaC               | 14C |       |       |      | NoAmplification          |
| blaOXA10-01                | 14C |       |       |      | NoAmplification          |
| blaOXA10-02                | 14C |       |       |      | NoAmplification          |
| blaOXY                     | 14C |       |       |      | CurveFitFailed           |
| blaPAO                     | 14C |       |       |      | NoAmplification          |
| blaPER                     | 14C |       |       |      | CurveFitFailed           |
| blaPSE                     | 14C |       |       |      | NoAmplification          |
| blaROB                     | 14C |       |       |      | NoAmplification          |
| blaSFO                     | 14C | 33.75 | 80.43 | 1.9  | MultipleMeltPeaks        |
| blaSHV-01                  | 14C |       |       |      | NoAmplification          |
| blaSHV-02                  | 14C |       |       |      | CurveFitFailed           |
| blaTEM                     | 14C | 44.53 | 62.49 | 1.74 | MultipleMeltPeaks        |
| blaTLA                     | 14C |       |       |      | NoAmplification          |
| blaVEB                     | 14C |       |       |      | NoAmplification          |
| blaVIM                     | 14C |       |       |      | NoAmplification          |
| blaZ                       | 14C |       |       |      | NoAmplification          |
| carB                       | 14C |       |       |      | CurveFitFailed           |
| catA1                      | 14C |       |       |      | NoAmplification          |
| catB3                      | 14C |       |       |      | NoAmplification          |
| catB8                      | 14C | 29.74 | 82.25 | 1.96 |                          |

|            |     |       |       |      |                              |
|------------|-----|-------|-------|------|------------------------------|
| ceoA       | 14C | 29.35 | 82.4  | 1.99 |                              |
| cepA       | 14C |       |       |      | NoAmplification              |
| cfiA       | 14C | 34.48 | 81.45 | 1.86 | MultipleMeltPeaks            |
| cfr        | 14C |       |       |      | LowEfficiency, CtIsSmall, Ct |
| cfxA       | 14C | 26.73 | 76.84 | 1.6  |                              |
| cmeA       | 14C |       |       |      | BadR2, LowEfficiency, CtIsS  |
| cmlA1-01   | 14C | 41.1  | 80.36 | 1.69 | MultipleMeltPeaks            |
| cmlA1-02   | 14C | 36    | 83.43 | 1.84 | MultipleMeltPeaks            |
| cmr        | 14C |       |       |      | CurveFitFailed               |
| cmx(A)     | 14C | 27.73 | 84.5  | 1.98 |                              |
| cphA-01    | 14C | 36.41 | 80.76 | 1.8  | MultipleMeltPeaks            |
| cphA-02    | 14C | 34.62 | 77.93 | 1.92 | MultipleMeltPeaks            |
| dfrA1      | 14C | 36.23 | 84.6  | 1.87 |                              |
| dfrA12     | 14C | 34.56 | 85.81 | 1.63 |                              |
| emrD       | 14C | 39.12 | 83.26 | 1.69 |                              |
| ereA       | 14C | 39.11 | 82.79 | 1.81 |                              |
| ereB       | 14C | 35.98 | 85.55 | 1.82 |                              |
| erm(34)    | 14C |       |       |      | NoAmplification              |
| erm(35)    | 14C |       |       |      | NoAmplification              |
| erm(36)    | 14C | 37.88 | 85.05 | 1.74 | MultipleMeltPeaks            |
| ermA       | 14C |       |       |      | NoAmplification              |
| ermA/ermTR | 14C |       |       |      | NoAmplification              |
| ermB       | 14C | 21.34 | 75.08 | 2.15 |                              |
| ermC       | 14C |       |       |      | CurveFitFailed               |
| ermF       | 14C |       |       |      | NoAmplification              |
| ermJ/ermD  | 14C |       |       |      | NoAmplification              |
| ermK-01    | 14C | 38.05 | 73.51 | 1.84 |                              |
| ermK-02    | 14C | 39.78 | 76.61 | 1.72 | MultipleMeltPeaks            |
| ermT-01    | 14C |       |       |      | NoAmplification              |
| ermT-02    | 14C |       |       |      | LowEfficiency, CtIsSmall, Ct |
| ermX       | 14C | 36.24 | 84.48 | 1.81 |                              |
| ermY       | 14C |       |       |      | NoAmplification              |
| fabK       | 14C | 24.68 | 79.41 | 2.11 |                              |
| floR       | 14C |       |       |      | NoAmplification              |
| folA       | 14C |       |       |      | NoAmplification              |
| fosB       | 14C |       |       |      | LowEfficiency, CtIsSmall, S: |
| fosX       | 14C |       |       |      | NoAmplification              |
| fox5       | 14C | 26.82 | 86.39 | 1.98 | MultipleMeltPeaks            |
| imiR       | 14C |       |       |      | CurveFitFailed               |
| ImrA-01    | 14C |       |       |      | NoAmplification              |
| intl       | 14C | 29.76 | 85.99 | 1.96 |                              |
| intl1      | 14C | 20.35 | 87.2  | 1.98 |                              |
| IS613      | 14C | 33.66 | 81.61 | 1.91 |                              |
| lnuA-01    | 14C |       |       |      | NoAmplification              |
| lnuB-01    | 14C |       |       |      | NoAmplification              |
| lnuB-02    | 14C |       |       |      | NoAmplification              |

|                |     |       |       |      |                   |
|----------------|-----|-------|-------|------|-------------------|
| lnuC           | 14C | 33.81 | 87.02 | 1.83 | MultipleMeltPeaks |
| marR-01        | 14C | 29.9  | 85.15 | 1.92 |                   |
| matA/mel       | 14C | 19.84 | 77.73 | 2.03 |                   |
| mdet1          | 14C |       |       |      | NoAmplification   |
| mdtA           | 14C |       |       |      | CurveFitFailed    |
| mdtE/yhiU      | 14C | 32.6  | 87.43 | 1.89 |                   |
| mecA           | 14C |       |       |      | NoAmplification   |
| mefA           | 14C | 19.85 | 80.48 | 1.94 | MultipleMeltPeaks |
| mepA           | 14C | 32.44 | 87.57 | 2.01 |                   |
| mexA           | 14C | 38.13 | 83.39 | 1.74 | MultipleMeltPeaks |
| mexD           | 14C | 32.21 | 80.13 | 2.03 |                   |
| mexE           | 14C | 38.7  | 83.67 | 1.75 | MultipleMeltPeaks |
| mexF           | 14C | 29.31 | 88.02 | 2.01 |                   |
| mphA-01        | 14C | 31.68 | 85.19 | 1.97 | MultipleMeltPeaks |
| mphA-02        | 14C | 33.66 | 76.68 | 1.59 | MultipleMeltPeaks |
| mphB           | 14C |       |       |      | CurveFitFailed    |
| mphC           | 14C | 37.06 | 76.3  | 1.84 |                   |
| msrA-01        | 14C |       |       |      | NoAmplification   |
| msrC-01        | 14C |       |       |      | NoAmplification   |
| mtrC-01        | 14C |       |       |      | NoAmplification   |
| mtrC-02        | 14C |       |       |      | CurveFitFailed    |
| mtrD-02        | 14C | 26.59 | 82.74 | 1.97 |                   |
| mtrD-03        | 14C | 32.93 | 82.27 | 1.9  |                   |
| NDM1           | 14C |       |       |      | NoAmplification   |
| nimE           | 14C | 34.04 | 85.1  | 2.02 |                   |
| nisB           | 14C |       |       |      | CurveFitFailed    |
| oleC           | 14C | 38.59 | 62.2  | 1.94 | MultipleMeltPeaks |
| oprD           | 14C | 30.17 | 81.7  | 1.98 | MultipleMeltPeaks |
| oprJ           | 14C | 32.19 | 87.82 | 2    | MultipleMeltPeaks |
| pbp            | 14C |       |       |      | NoAmplification   |
| pbp2x          | 14C |       |       |      | NoAmplification   |
| Pbp5           | 14C |       |       |      | NoAmplification   |
| penA           | 14C |       |       |      | CurveFitFailed    |
| pikR1          | 14C |       |       |      | NoAmplification   |
| pikR2          | 14C | 36.7  | 84.78 | 1.79 |                   |
| pmrA           | 14C | 23.26 | 79.22 | 2.1  |                   |
| pncA           | 14C | 32.22 | 88.63 | 1.93 | MultipleMeltPeaks |
| putative multi | 14C | 33.07 | 84.01 | 1.98 |                   |
| qac            | 14C |       |       |      | CurveFitFailed    |
| qacA           | 14C |       |       |      | NoAmplification   |
| qacA/qacB      | 14C |       |       |      | NoAmplification   |
| qacEdelta1-0   | 14C |       |       |      | NoAmplification   |
| qacEdelta1-0   | 14C | 33.98 | 77.32 | 1.94 |                   |
| qacH-01        | 14C | 33.88 | 85.28 | 1.99 |                   |
| qacH-02        | 14C | 31.97 | 79.47 | 2    |                   |
| qnrA           | 14C |       |       |      | NoAmplification   |



|              |     |       |       |      |                              |
|--------------|-----|-------|-------|------|------------------------------|
| rarD-02      | 14C | 34.72 | 82.66 | 1.93 |                              |
| sat4         | 14C |       |       |      | CurveFitFailed               |
| sdeB         | 14C |       |       |      | NoAmplification              |
| spcN-01      | 14C |       |       |      | NoAmplification              |
| speA         | 14C |       |       |      | NoAmplification              |
| str          | 14C |       |       |      | NoAmplification              |
| strA         | 14C |       |       |      | NoAmplification              |
| strB         | 14C |       |       |      | CurveFitFailed               |
| sul1         | 14C | 37.18 | 88.44 | 1.53 |                              |
| sul2         | 14C |       |       |      | NoAmplification              |
| sulA/foIP-01 | 14C | 20.11 | 80.93 | 1.97 |                              |
| sulA/foIP-03 | 14C | 22.76 | 83.11 | 1.99 |                              |
| tet(32)      | 14C |       |       |      | NoAmplification              |
| tet(34)      | 14C | 28.5  | 75.89 | 2.02 |                              |
| tet(35)      | 14C |       |       |      | NoAmplification              |
| tet(36)-A    | 14C |       |       |      | LowEfficiency, CtlsSmall, S: |
| tet(36)-B    | 14C |       |       |      | NoAmplification              |
| tet(37)      | 14C | 30.72 | 92.38 | 2    | MultipleMeltPeaks            |
| tetA-01      | 14C | 32.31 | 85.1  | 1.94 |                              |
| tetA-02      | 14C |       |       |      | CurveFitFailed               |
| tetB-01      | 14C | 33.24 | 83.18 | 1.98 | MultipleMeltPeaks            |
| tetB-02      | 14C |       |       |      | CurveFitFailed               |
| tetC-01      | 14C |       |       |      | NoAmplification              |
| tetC-02      | 14C |       |       |      | NoAmplification              |
| tetD-01      | 14C |       |       |      | NoAmplification              |
| tetD-02      | 14C | 37.37 | 85.18 | 1.77 |                              |
| tetE         | 14C | 38.62 | 85.05 | 1.91 |                              |
| tetG-01      | 14C | 35.48 | 82.1  | 1.84 |                              |
| tetG-02      | 14C | 32.91 | 81.93 | 1.91 |                              |
| tetH         | 14C |       |       |      | NoAmplification              |
| tetJ         | 14C |       |       |      | NoAmplification              |
| tetK         | 14C |       |       |      | NoAmplification              |
| tetL-01      | 14C | 39.61 | 86.64 | 1.63 | MultipleMeltPeaks            |
| tetL-02      | 14C | 33.91 | 84.79 | 1.88 |                              |
| tetM-01      | 14C | 21.72 | 76.34 | 2.02 |                              |
| tetM-02      | 14C | 23.63 | 77.55 | 2.02 |                              |
| tetO-01      | 14C | 35.18 | 81.44 | 1.8  |                              |
| tetPA        | 14C |       |       |      | NoAmplification              |
| tetPB-01     | 14C |       |       |      | NoAmplification              |
| tetPB-02     | 14C | 29.28 | 85.19 | 2.11 |                              |
| tetPB-03     | 14C |       |       |      | NoAmplification              |
| tetPB-05     | 14C |       |       |      | NoAmplification              |
| tetQ         | 14C |       |       |      | NoAmplification              |
| tetR-02      | 14C | 33.98 | 88.23 | 1.86 |                              |
| tetR-03      | 14C |       |       |      | NoAmplification              |
| tetS         | 14C | 39.82 | 85.49 | 1.74 | MultipleMeltPeaks            |

|             |     |       |       |                               |
|-------------|-----|-------|-------|-------------------------------|
| tetT        | 14C |       |       | NoAmplification               |
| tetU-01     | 14C |       |       | NoAmplification               |
| tetV        | 14C | 35.97 | 74.26 | 1.85                          |
| tetW-01     | 14C |       |       | CurveFitFailed                |
| tetX        | 14C | 42.02 | 80.23 | 1.73 MultipleMeltPeaks        |
| tnpA-01     | 14C |       |       | NoAmplification               |
| tnpA-02     | 14C |       |       | CurveFitFailed                |
| tnpA-03     | 14C | 33.7  | 76.02 | 2.11                          |
| tnpA-04     | 14C |       |       | NoAmplification               |
| tnpA-05     | 14C |       |       | NoAmplification               |
| tnpA-07     | 14C |       |       | NoAmplification               |
| tolC-01     | 14C |       |       | NoAmplification               |
| tolC-02     | 14C | 29.73 | 87.71 | 1.98                          |
| tolC-03     | 14C | 32    | 85.42 | 1.99                          |
| Tp614       | 14C |       |       | CurveFitFailed                |
| ttgA        | 14C |       |       | CurveFitFailed                |
| ttgB        | 14C | 37.58 | 84.99 | 1.79 MultipleMeltPeaks        |
| vanA        | 14C |       |       | NoAmplification               |
| vanB-01     | 14C | 35.52 | 81.3  | 1.9                           |
| vanC-01     | 14C |       |       | CurveFitFailed                |
| vanC-02     | 14C |       |       | NoAmplification               |
| vanC-03     | 14C | 24.9  | 85.92 | 1.93 MultipleMeltPeaks        |
| vanC1       | 14C |       |       | NoAmplification               |
| vanC2/vanC3 | 14C | 33.52 | 84.93 | 1.96                          |
| vanG        | 14C |       |       | NoAmplification               |
| vanHB       | 14C |       |       | NoAmplification               |
| vanHD       | 14C |       |       | CurveFitFailed                |
| vanRA-01    | 14C |       |       | NoAmplification               |
| vanRA-02    | 14C |       |       | NoAmplification               |
| vanRB       | 14C | 38.08 | 75.77 | 1.53                          |
| vanRC       | 14C |       |       | NoAmplification               |
| vanRC4      | 14C |       |       | NoAmplification               |
| vanRD       | 14C |       |       | NoAmplification               |
| vanSA       | 14C |       |       | NoAmplification               |
| vanSB       | 14C | 27.72 | 74.87 | 2.07                          |
| vanSC-01    | 14C | 34.25 | 77.13 | 1.97                          |
| vanSC-02    | 14C | 33.17 | 75.99 | 1.88                          |
| vanTC-01    | 14C |       |       | NoAmplification               |
| vanTC-02    | 14C | 35.19 | 86.3  | 1.8                           |
| vanTE       | 14C | 43.55 | 61.56 | 2.43 BadR2, MultipleMeltPeaks |
| vanTG       | 14C |       |       | NoAmplification               |
| vanWB       | 14C |       |       | NoAmplification               |
| vanWG       | 14C | 40.37 | 79.01 | 1.74 MultipleMeltPeaks        |
| vanXA       | 14C |       |       | NoAmplification               |
| vanXB       | 14C |       |       | NoAmplification               |
| vanXD       | 14C | 28.24 | 75.85 | 2.04                          |

|              |     |       |       |      |                           |
|--------------|-----|-------|-------|------|---------------------------|
| vanYB        | 14C | 31.96 | 81.21 | 1.95 |                           |
| vanYD-01     | 14C | 32.29 | 85.32 | 1.87 |                           |
| vanYD-02     | 14C |       |       |      | NoAmplification           |
| vatB-01      | 14C |       |       |      | NoAmplification           |
| vatB-02      | 14C | 39.09 | 77.58 | 1.74 | MultipleMeltPeaks         |
| vatC-01      | 14C |       |       |      | CtIsLarge, CurveFitFailed |
| vatC-02      | 14C | 35.98 | 87.58 | 1.84 | MultipleMeltPeaks         |
| vatE-01      | 14C | 28.33 | 77.6  | 2.06 |                           |
| vatE-02      | 14C |       |       |      | NoAmplification           |
| vgaA-01      | 14C |       |       |      | NoAmplification           |
| vgaA-02      | 14C |       |       |      | CurveFitFailed            |
| vgb-01       | 14C |       |       |      | CurveFitFailed            |
| vgbB-01      | 14C |       |       |      | NoAmplification           |
| vgbB-02      | 14C |       |       |      | NoAmplification           |
| yceE/mdtG-0  | 14C |       |       |      | CurveFitFailed            |
| yceE/mdtG-0  | 14C | 34.19 | 80.8  | 1.95 |                           |
| yceL/mdtH-0  | 14C | 32.54 | 80.72 | 1.95 | MultipleMeltPeaks         |
| yceL/mdtH-0  | 14C |       |       |      | NoAmplification           |
| yceL/mdtH-0  | 14C | 37.83 | 77.59 | 1.71 | MultipleMeltPeaks         |
| yidY/mdtL-01 | 14C | 31.58 | 82.7  | 1.96 |                           |
| yidY/mdtL-02 | 14C |       |       |      | NoAmplification           |































| Assay          | Sample | Ct    | Tm    | Efficiency | flag              |
|----------------|--------|-------|-------|------------|-------------------|
| 16S rRNA       | 15A    |       | 18.64 | 82.11      | 1.89              |
| aac            | 15A    |       | 31.35 | 78.1       | 1.8               |
| aac(6')-Ib(akz | 15A    |       |       |            | NoAmplification   |
| aac(6')-Ib(akz | 15A    | 29.81 | 82.23 | 1.92       |                   |
| aac(6')-Ib(akz | 15A    |       |       |            | CurveFitFailed    |
| aac(6')-II     | 15A    |       |       |            | NoAmplification   |
| aac(6')I1      | 15A    |       |       |            | NoAmplification   |
| aacA/aphD      | 15A    |       |       |            | NoAmplification   |
| aacC           | 15A    | 37.97 | 86.6  | 1.72       | MultipleMeltPeaks |
| aacC1          | 15A    |       |       |            | NoAmplification   |
| aacC2          | 15A    |       |       |            | NoAmplification   |
| aacC4          | 15A    |       |       |            | NoAmplification   |
| aadA-01        | 15A    |       |       |            | NoAmplification   |
| aadA-02        | 15A    |       |       |            | NoAmplification   |
| aadA-1-01      | 15A    | 29.64 | 79.05 | 1.91       |                   |
| aadA-1-02      | 15A    |       |       |            | NoAmplification   |
| aadA1          | 15A    |       |       |            | NoAmplification   |
| aadA2-01       | 15A    |       |       |            | NoAmplification   |
| aadA2-02       | 15A    |       |       |            | NoAmplification   |
| aadA2-03       | 15A    |       |       |            | NoAmplification   |
| aadA5-01       | 15A    |       |       |            | NoAmplification   |
| aadA5-02       | 15A    | 36.54 | 78.06 | 1.88       |                   |
| aadA9-01       | 15A    |       |       |            | NoAmplification   |
| aadA9-02       | 15A    |       |       |            | NoAmplification   |
| aadD           | 15A    |       |       |            | NoAmplification   |
| aadE           | 15A    | 29.85 | 71.8  | 2.09       |                   |
| acrA-01        | 15A    | 33.22 | 88.7  | 1.96       |                   |
| acrA-02        | 15A    |       |       |            | NoAmplification   |
| acrA-03        | 15A    |       |       |            | NoAmplification   |
| acrA-04        | 15A    | 31.35 | 80.45 | 1.98       |                   |
| acrA-05        | 15A    | 30.83 | 79.95 | 1.93       | MultipleMeltPeaks |
| acrB-01        | 15A    |       |       |            | NoAmplification   |
| acrF           | 15A    | 36.2  | 81.95 | 1.98       |                   |
| acrR-01        | 15A    |       |       |            | NoAmplification   |
| acrR-02        | 15A    | 31.5  | 90.31 | 1.97       |                   |
| Actin          | 15A    | 20.4  | 87.06 | 1.93       |                   |
| adeA           | 15A    | 39.84 | 83.59 | 1.87       | MultipleMeltPeaks |
| ampC-01        | 15A    |       |       |            | CurveFitFailed    |
| ampC-02        | 15A    |       |       |            | NoAmplification   |
| ampC-04        | 15A    | 35.61 | 89.58 | 1.72       |                   |
| ampC-05        | 15A    |       |       |            | NoAmplification   |
| ampC-06        | 15A    | 35.58 | 80.05 | 1.9        |                   |
| ampC-07        | 15A    |       |       |            | NoAmplification   |
| ampC-09        | 15A    | 35.3  | 82.74 | 1.88       |                   |
| ampC/blaDH     | 15A    | 35.71 | 75.78 | 1.92       |                   |

|                          |     |       |       |      |                 |
|--------------------------|-----|-------|-------|------|-----------------|
| aph                      | 15A |       |       |      | NoAmplification |
| aph(2')-Id-01            | 15A |       |       |      | NoAmplification |
| aph(2')-Id-02            | 15A |       |       |      | NoAmplification |
| aph6ia                   | 15A |       |       |      | NoAmplification |
| aphA1(aka k <sub>z</sub> | 15A |       |       |      | NoAmplification |
| bacA-01                  | 15A |       |       |      | NoAmplification |
| bacA-02                  | 15A |       |       |      | CurveFitFailed  |
| BETA-globin              | 15A | 21.63 | 84.09 | 1.98 |                 |
| bla-ACC-1                | 15A |       |       |      | NoAmplification |
| bla-L1                   | 15A | 30.36 | 84.99 | 1.87 |                 |
| bla1                     | 15A |       |       |      | NoAmplification |
| blaCMY                   | 15A |       |       |      | NoAmplification |
| blaCMY2-01               | 15A | 35.49 | 77.72 | 1.95 |                 |
| blaCMY2-02               | 15A | 33.25 | 82.2  | 1.83 |                 |
| blaCTX-M-01              | 15A |       |       |      | NoAmplification |
| blaCTX-M-02              | 15A |       |       |      | NoAmplification |
| blaCTX-M-03              | 15A |       |       |      | NoAmplification |
| blaCTX-M-04              | 15A |       |       |      | NoAmplification |
| blaCTX-M-05              | 15A |       |       |      | NoAmplification |
| blaCTX-M-06              | 15A | 39.16 | 74.8  | 1.8  |                 |
| blaGES                   | 15A |       |       |      | NoAmplification |
| blaIMP-01                | 15A |       |       |      | NoAmplification |
| blaIMP-02                | 15A |       |       |      | NoAmplification |
| blaMOX/blaC              | 15A |       |       |      | NoAmplification |
| blaOCH                   | 15A |       |       |      | NoAmplification |
| blaOKP                   | 15A |       |       |      | NoAmplification |
| blaOXA1/blaC             | 15A |       |       |      | NoAmplification |
| blaOXA10-01              | 15A |       |       |      | NoAmplification |
| blaOXA10-02              | 15A |       |       |      | NoAmplification |
| blaOXY                   | 15A |       |       |      | NoAmplification |
| blaPAO                   | 15A | 36.78 | 73.84 | 1.88 |                 |
| blaPER                   | 15A |       |       |      | NoAmplification |
| blaPSE                   | 15A |       |       |      | NoAmplification |
| blaROB                   | 15A |       |       |      | NoAmplification |
| blaSFO                   | 15A | 35.94 | 80.77 | 1.81 |                 |
| blaSHV-01                | 15A |       |       |      | NoAmplification |
| blaSHV-02                | 15A |       |       |      | NoAmplification |
| blaTEM                   | 15A | 28.15 | 78.82 | 1.42 |                 |
| blaTLA                   | 15A |       |       |      | NoAmplification |
| blaVEB                   | 15A |       |       |      | NoAmplification |
| blaVIM                   | 15A |       |       |      | NoAmplification |
| blaZ                     | 15A |       |       |      | NoAmplification |
| carB                     | 15A |       |       |      | NoAmplification |
| catA1                    | 15A |       |       |      | NoAmplification |
| catB3                    | 15A |       |       |      | NoAmplification |
| catB8                    | 15A | 28.49 | 81.82 | 1.99 |                 |

|            |     |       |       |      |                             |
|------------|-----|-------|-------|------|-----------------------------|
| ceoA       | 15A | 35.64 | 82.46 | 1.88 |                             |
| cepA       | 15A |       |       |      | NoAmplification             |
| cfiA       | 15A | 31.69 | 88.19 | 1.94 | MultipleMeltPeaks           |
| cfr        | 15A |       |       |      | NoAmplification             |
| cfxA       | 15A | 30.04 | 77.14 | 1.94 |                             |
| cmeA       | 15A |       |       |      | NoAmplification             |
| cmlA1-01   | 15A |       |       |      | NoAmplification             |
| cmlA1-02   | 15A |       |       |      | NoAmplification             |
| cmr        | 15A |       |       |      | NoAmplification             |
| cmx(A)     | 15A | 33.05 | 79.21 | 1.83 |                             |
| cphA-01    | 15A |       |       |      | NoAmplification             |
| cphA-02    | 15A | 37.44 | 82.42 | 1.74 |                             |
| dfrA1      | 15A |       |       |      | NoAmplification             |
| dfrA12     | 15A |       |       |      | NoAmplification             |
| emrD       | 15A |       |       |      | NoAmplification             |
| ereA       | 15A |       |       |      | NoAmplification             |
| ereB       | 15A |       |       |      | NoAmplification             |
| erm(34)    | 15A |       |       |      | NoAmplification             |
| erm(35)    | 15A |       |       |      | NoAmplification             |
| erm(36)    | 15A |       |       |      | NoAmplification             |
| ermA       | 15A |       |       |      | NoAmplification             |
| ermA/ermTR | 15A |       |       |      | NoAmplification             |
| ermB       | 15A | 26.75 | 74.78 | 1.91 |                             |
| ermC       | 15A |       |       |      | NoAmplification             |
| ermF       | 15A |       |       |      | NoAmplification             |
| ermJ/ermD  | 15A |       |       |      | NoAmplification             |
| ermK-01    | 15A |       |       |      | NoAmplification             |
| ermK-02    | 15A |       |       |      | NoAmplification             |
| ermT-01    | 15A |       |       |      | NoAmplification             |
| ermT-02    | 15A |       |       |      | NoAmplification             |
| ermX       | 15A |       |       |      | NoAmplification             |
| ermY       | 15A |       |       |      | NoAmplification             |
| fabK       | 15A | 24.1  | 77.37 | 2.11 |                             |
| floR       | 15A |       |       |      | NoAmplification             |
| folA       | 15A |       |       |      | NoAmplification             |
| fosB       | 15A |       |       |      | LowEfficiency, CtlSmall, S: |
| fosX       | 15A |       |       |      | NoAmplification             |
| fox5       | 15A | 29.98 | 86.25 | 1.66 |                             |
| imiR       | 15A |       |       |      | NoAmplification             |
| ImrA-01    | 15A |       |       |      | NoAmplification             |
| intl       | 15A |       |       |      | NoAmplification             |
| intl1      | 15A | 21.77 | 87.12 | 2.03 | MultipleMeltPeaks           |
| IS613      | 15A | 28.86 | 79.16 | 1.53 |                             |
| lnuA-01    | 15A |       |       |      | NoAmplification             |
| lnuB-01    | 15A |       |       |      | NoAmplification             |
| lnuB-02    | 15A |       |       |      | NoAmplification             |

|               |     |       |       |      |                   |
|---------------|-----|-------|-------|------|-------------------|
| lnuC          | 15A | 34.45 | 86.86 | 1.82 |                   |
| marR-01       | 15A |       |       |      | CurveFitFailed    |
| matA/mel      | 15A | 22.52 | 77.55 | 2.06 |                   |
| mdet1         | 15A |       |       |      | NoAmplification   |
| mdtA          | 15A |       |       |      | NoAmplification   |
| mdtE/yhiU     | 15A |       |       |      | NoAmplification   |
| mecA          | 15A |       |       |      | NoAmplification   |
| mefA          | 15A | 22.28 | 80.48 | 1.97 |                   |
| mepA          | 15A |       |       |      | CurveFitFailed    |
| mexA          | 15A |       |       |      | NoAmplification   |
| mexD          | 15A |       |       |      | CurveFitFailed    |
| mexE          | 15A |       |       |      | NoAmplification   |
| mexF          | 15A | 29.31 | 80.92 | 1.73 | MultipleMeltPeaks |
| mphA-01       | 15A | 30.05 | 86.81 | 1.94 |                   |
| mphA-02       | 15A | 26.97 | 78    | 1.92 |                   |
| mphB          | 15A | 30.26 | 88.02 | 1.97 |                   |
| mphC          | 15A |       |       |      | NoAmplification   |
| msrA-01       | 15A |       |       |      | NoAmplification   |
| msrC-01       | 15A |       |       |      | NoAmplification   |
| mtrC-01       | 15A |       |       |      | NoAmplification   |
| mtrC-02       | 15A |       |       |      | CurveFitFailed    |
| mtrD-02       | 15A | 22.01 | 80.41 | 2.01 |                   |
| mtrD-03       | 15A | 22.05 | 80.69 | 1.79 |                   |
| NDM1          | 15A |       |       |      | NoAmplification   |
| nimE          | 15A |       |       |      | NoAmplification   |
| nisB          | 15A |       |       |      | NoAmplification   |
| oleC          | 15A |       |       |      | NoAmplification   |
| oprD          | 15A | 32.08 | 83.16 | 1.99 | MultipleMeltPeaks |
| oprJ          | 15A |       |       |      | NoAmplification   |
| pbp           | 15A |       |       |      | NoAmplification   |
| pbp2x         | 15A | 23.48 | 75.49 | 1.77 |                   |
| Pbp5          | 15A |       |       |      | NoAmplification   |
| penA          | 15A | 21.74 | 80.83 | 1.94 |                   |
| pikR1         | 15A |       |       |      | NoAmplification   |
| pikR2         | 15A | 38.39 | 84.7  | 1.75 |                   |
| pmrA          | 15A | 25.43 | 79.49 | 2.07 |                   |
| pncA          | 15A | 34.85 | 87.06 | 1.87 |                   |
| putative mult | 15A |       |       |      | CurveFitFailed    |
| qac           | 15A |       |       |      | NoAmplification   |
| qacA          | 15A |       |       |      | NoAmplification   |
| qacA/qacB     | 15A |       |       |      | NoAmplification   |
| qacEdelta1-0  | 15A |       |       |      | NoAmplification   |
| qacEdelta1-0  | 15A |       |       |      | NoAmplification   |
| qacH-01       | 15A |       |       |      | NoAmplification   |
| qacH-02       | 15A |       |       |      | NoAmplification   |
| qnrA          | 15A |       |       |      | NoAmplification   |

|              |     |       |       |      |                   |
|--------------|-----|-------|-------|------|-------------------|
| rarD-02      | 15A |       |       |      | NoAmplification   |
| sat4         | 15A | 30.23 | 74.69 | 2    |                   |
| sdeB         | 15A |       |       |      | NoAmplification   |
| spcN-01      | 15A |       |       |      | NoAmplification   |
| speA         | 15A |       |       |      | NoAmplification   |
| str          | 15A |       |       |      | NoAmplification   |
| strA         | 15A |       |       |      | NoAmplification   |
| strB         | 15A |       |       |      | NoAmplification   |
| sul1         | 15A |       |       |      | NoAmplification   |
| sul2         | 15A |       |       |      | NoAmplification   |
| sulA/foIP-01 | 15A | 23.1  | 81.04 | 2.01 |                   |
| sulA/foIP-03 | 15A | 23.05 | 82.64 | 2.02 |                   |
| tet(32)      | 15A |       |       |      | NoAmplification   |
| tet(34)      | 15A | 31.22 | 75.55 | 1.95 |                   |
| tet(35)      | 15A |       |       |      | NoAmplification   |
| tet(36)-A    | 15A |       |       |      | NoAmplification   |
| tet(36)-B    | 15A |       |       |      | NoAmplification   |
| tet(37)      | 15A | 32.92 | 78.31 | 1.94 | MultipleMeltPeaks |
| tetA-01      | 15A |       |       |      | NoAmplification   |
| tetA-02      | 15A |       |       |      | NoAmplification   |
| tetB-01      | 15A |       |       |      | CurveFitFailed    |
| tetB-02      | 15A |       |       |      | NoAmplification   |
| tetC-01      | 15A |       |       |      | NoAmplification   |
| tetC-02      | 15A |       |       |      | NoAmplification   |
| tetD-01      | 15A |       |       |      | NoAmplification   |
| tetD-02      | 15A |       |       |      | NoAmplification   |
| tetE         | 15A |       |       |      | NoAmplification   |
| tetG-01      | 15A | 32.81 | 75.77 | 1.91 |                   |
| tetG-02      | 15A |       |       |      | NoAmplification   |
| tetH         | 15A |       |       |      | NoAmplification   |
| tetJ         | 15A |       |       |      | NoAmplification   |
| tetK         | 15A |       |       |      | NoAmplification   |
| tetL-01      | 15A |       |       |      | NoAmplification   |
| tetL-02      | 15A |       |       |      | NoAmplification   |
| tetM-01      | 15A | 23.12 | 75.91 | 2.05 |                   |
| tetM-02      | 15A | 24.09 | 77.47 | 2.06 |                   |
| tetO-01      | 15A |       |       |      | NoAmplification   |
| tetPA        | 15A |       |       |      | NoAmplification   |
| tetPB-01     | 15A | 33.13 | 83.21 | 2.01 |                   |
| tetPB-02     | 15A | 29.55 | 84.77 | 2.02 |                   |
| tetPB-03     | 15A |       |       |      | NoAmplification   |
| tetPB-05     | 15A |       |       |      | NoAmplification   |
| tetQ         | 15A | 27.84 | 76.07 | 2.05 |                   |
| tetR-02      | 15A |       |       |      | CurveFitFailed    |
| tetR-03      | 15A |       |       |      | NoAmplification   |
| tetS         | 15A | 36.11 | 73.98 | 1.82 |                   |

|             |     |       |       |      |                   |
|-------------|-----|-------|-------|------|-------------------|
| tetT        | 15A | 41.17 | 78.88 | 1.8  |                   |
| tetU-01     | 15A |       |       |      | NoAmplification   |
| tetV        | 15A |       |       |      | NoAmplification   |
| tetW-01     | 15A | 27.61 | 81.54 | 2.01 |                   |
| tetX        | 15A |       |       |      | NoAmplification   |
| tnpA-01     | 15A |       |       |      | NoAmplification   |
| tnpA-02     | 15A |       |       |      | NoAmplification   |
| tnpA-03     | 15A |       |       |      | NoAmplification   |
| tnpA-04     | 15A |       |       |      | NoAmplification   |
| tnpA-05     | 15A | 29.18 | 80.7  | 1.91 |                   |
| tnpA-07     | 15A |       |       |      | NoAmplification   |
| tolC-01     | 15A | 37.89 | 80.86 | 1.65 | MultipleMeltPeaks |
| tolC-02     | 15A | 33.22 | 83.65 | 1.91 | MultipleMeltPeaks |
| tolC-03     | 15A | 31.62 | 86.04 | 2    |                   |
| Tp614       | 15A |       |       |      | NoAmplification   |
| ttgA        | 15A | 35.67 | 81.39 | 1.78 | MultipleMeltPeaks |
| ttgB        | 15A |       |       |      | NoAmplification   |
| vanA        | 15A |       |       |      | NoAmplification   |
| vanB-01     | 15A |       |       |      | CurveFitFailed    |
| vanC-01     | 15A | 44.71 | 76.19 | 1.96 |                   |
| vanC-02     | 15A |       |       |      | NoAmplification   |
| vanC-03     | 15A | 27.17 | 86.26 | 1.96 |                   |
| vanC1       | 15A |       |       |      | NoAmplification   |
| vanC2/vanC3 | 15A | 33.01 | 77.85 | 1.88 | MultipleMeltPeaks |
| vanG        | 15A |       |       |      | NoAmplification   |
| vanHB       | 15A |       |       |      | NoAmplification   |
| vanHD       | 15A |       |       |      | NoAmplification   |
| vanRA-01    | 15A |       |       |      | NoAmplification   |
| vanRA-02    | 15A |       |       |      | NoAmplification   |
| vanRB       | 15A |       |       |      | NoAmplification   |
| vanRC       | 15A |       |       |      | NoAmplification   |
| vanRC4      | 15A |       |       |      | NoAmplification   |
| vanRD       | 15A |       |       |      | NoAmplification   |
| vanSA       | 15A |       |       |      | NoAmplification   |
| vanSB       | 15A | 27.76 | 74.55 | 2.02 |                   |
| vanSC-01    | 15A | 38.76 | 84.03 | 1.82 |                   |
| vanSC-02    | 15A |       |       |      | NoAmplification   |
| vanTC-01    | 15A |       |       |      | NoAmplification   |
| vanTC-02    | 15A |       |       |      | NoAmplification   |
| vanTE       | 15A |       |       |      | NoAmplification   |
| vanTG       | 15A |       |       |      | NoAmplification   |
| vanWB       | 15A |       |       |      | NoAmplification   |
| vanWG       | 15A |       |       |      | NoAmplification   |
| vanXA       | 15A |       |       |      | CurveFitFailed    |
| vanXB       | 15A |       |       |      | NoAmplification   |
| vanXD       | 15A | 29.37 | 75.59 | 2.06 |                   |

|              |     |       |       |      |                   |
|--------------|-----|-------|-------|------|-------------------|
| vanYB        | 15A | 32.41 | 85.17 | 1.98 | MultipleMeltPeaks |
| vanYD-01     | 15A | 29.65 | 82.79 | 1.87 |                   |
| vanYD-02     | 15A | 38.7  | 79.91 | 1.84 |                   |
| vatB-01      | 15A |       |       |      | NoAmplification   |
| vatB-02      | 15A |       |       |      | NoAmplification   |
| vatC-01      | 15A |       |       |      | NoAmplification   |
| vatC-02      | 15A | 44.74 | 64.03 | 1.93 | MultipleMeltPeaks |
| vatE-01      | 15A | 29.03 | 76.15 | 2.06 |                   |
| vatE-02      | 15A |       |       |      | NoAmplification   |
| vgaA-01      | 15A |       |       |      | NoAmplification   |
| vgaA-02      | 15A |       |       |      | NoAmplification   |
| vgb-01       | 15A |       |       |      | NoAmplification   |
| vgbB-01      | 15A | 33.55 | 76.49 | 1.98 |                   |
| vgbB-02      | 15A |       |       |      | NoAmplification   |
| yceE/mdtG-0  | 15A |       |       |      | NoAmplification   |
| yceE/mdtG-0  | 15A |       |       |      | NoAmplification   |
| yceL/mdtH-0  | 15A | 30.88 | 76.15 | 1.94 |                   |
| yceL/mdtH-0  | 15A |       |       |      | NoAmplification   |
| yceL/mdtH-0  | 15A | 41.14 | 78.82 | 1.83 |                   |
| yidY/mdtL-01 | 15A | 34.04 | 79.69 | 1.93 |                   |
| yidY/mdtL-02 | 15A |       |       |      | NoAmplification   |































| Assay          | Sample | Ct | Tm    | Efficiency | flag                              |
|----------------|--------|----|-------|------------|-----------------------------------|
| 16S rRNA       | 15B    |    | 16.76 | 81.78      | 2.05                              |
| aac            | 15B    |    | 31.13 | 85.86      | 1.76 LowEfficiency, CtIsLarge, S: |
| aac(6')-Ib(akz | 15B    |    |       |            | NoAmplification                   |
| aac(6')-Ib(akz | 15B    |    | 30.2  | 85.93      | 1.95 CtIsLarge, SaturationBaseli  |
| aac(6')-Ib(akz | 15B    |    | 31.6  | 90.4       | 1.89 CtIsLarge, SaturationBaseli  |
| aac(6')-II     | 15B    |    | 33.51 | 90.86      | 1.88 CtIsLarge, SaturationBaseli  |
| aac(6')I1      | 15B    |    |       |            | CurveFitFailed                    |
| aacA/aphD      | 15B    |    |       |            | NoAmplification                   |
| aacC           | 15B    |    | 31.82 | 84.85      | 1.62 LowEfficiency, CtIsLarge, S: |
| aacC1          | 15B    |    |       |            | NoAmplification                   |
| aacC2          | 15B    |    |       |            | NoAmplification                   |
| aacC4          | 15B    |    | 33.7  | 90.99      | 1.87 CtIsLarge, SaturationBaseli  |
| aadA-01        | 15B    |    |       |            | NoAmplification                   |
| aadA-02        | 15B    |    |       |            | NoAmplification                   |
| aadA-1-01      | 15B    |    | 25.69 | 79.49      | 1.81 SaturationBaselineRatiolsL   |
| aadA-1-02      | 15B    |    | 24.74 | 76         | 1.81 SaturationBaselineRatiolsL   |
| aadA1          | 15B    |    | 32.1  | 83.44      | 1.73 LowEfficiency, CtIsLarge, S: |
| aadA2-01       | 15B    |    |       |            | NoAmplification                   |
| aadA2-02       | 15B    |    | 33.03 | 74.69      | 1.94 CtIsLarge, SaturationBaseli  |
| aadA2-03       | 15B    |    |       |            | BadR2, LowEfficiency, CtIsS       |
| aadA5-01       | 15B    |    |       |            | CtIsLarge, SaturationBaseli       |
| aadA5-02       | 15B    |    | 31.78 | 87.9       | 1.93 CtIsLarge, SaturationBaseli  |
| aadA9-01       | 15B    |    | 34.69 | 82.08      | 2.01 CtIsLarge, SaturationBaseli  |
| aadA9-02       | 15B    |    |       |            | NoAmplification                   |
| aadD           | 15B    |    |       |            | NoAmplification                   |
| aadE           | 15B    |    | 24.86 | 71.21      | 1.93 SaturationBaselineRatiolsL   |
| acrA-01        | 15B    |    | 29.98 | 88.54      | 2.06 CtIsLarge, SaturationBaseli  |
| acrA-02        | 15B    |    |       |            | LowEfficiency, CtIsSmall, S:      |
| acrA-03        | 15B    |    |       |            | CtIsLarge, SaturationBaseli       |
| acrA-04        | 15B    |    | 29.49 | 80.12      | 1.93 SaturationBaselineRatiolsL   |
| acrA-05        | 15B    |    | 30.74 | 88.67      | 1.87 CtIsLarge, SaturationBaseli  |
| acrB-01        | 15B    |    |       |            | CtIsLarge, SaturationBaseli       |
| acrF           | 15B    |    | 34.27 | 81.83      | 1.73 LowEfficiency, CtIsLarge, S: |
| acrR-01        | 15B    |    | 34.44 | 90.43      | 1.88 CtIsLarge, SaturationBaseli  |
| acrR-02        | 15B    |    | 31.46 | 85.23      | 1.92 CtIsLarge, SaturationBaseli  |
| Actin          | 15B    |    | 19    | 87.01      | 2.06 SaturationBaselineRatiolsL   |
| adeA           | 15B    |    |       |            | NoAmplification                   |
| ampC-01        | 15B    |    | 31.87 | 85.2       | 1.89 CtIsLarge, SaturationBaseli  |
| ampC-02        | 15B    |    |       |            | LowEfficiency, CtIsSmall, C:      |
| ampC-04        | 15B    |    | 32.85 | 87.86      | 1.63 LowEfficiency, CtIsLarge, S: |
| ampC-05        | 15B    |    |       |            | NoAmplification                   |
| ampC-06        | 15B    |    |       |            | NoAmplification                   |
| ampC-07        | 15B    |    |       |            | CurveFitFailed                    |
| ampC-09        | 15B    |    |       |            | NoAmplification                   |
| ampC/blaDH,    | 15B    |    | 29.22 | 85.14      | 1.87 SaturationBaselineRatiolsL   |

|                            |     |       |       |                                    |
|----------------------------|-----|-------|-------|------------------------------------|
| aph                        | 15B |       |       | NoAmplification                    |
| aph(2')-Id-01              | 15B |       |       | NoAmplification                    |
| aph(2')-Id-02              | 15B |       |       | NoAmplification                    |
| aph6ia                     | 15B |       |       | NoAmplification                    |
| aphA1(aka k <sub>z</sub> ) | 15B |       |       | NoAmplification                    |
| bacA-01                    | 15B |       |       | NoAmplification                    |
| bacA-02                    | 15B | 32.6  | 87.69 | 1.9 CtlIsLarge, SaturationBaseli   |
| BETA-globin                | 15B | 20.02 | 84.02 | 2.04 SaturationBaselineRatiolsL    |
| bla-ACC-1                  | 15B |       |       | CurveFitFailed                     |
| bla-L1                     | 15B | 30.49 | 85.84 | 1.91 CtlIsLarge, SaturationBaseli  |
| bla1                       | 15B |       |       | NoAmplification                    |
| blaCMY                     | 15B |       |       | CurveFitFailed                     |
| blaCMY2-01                 | 15B | 34.69 | 77.12 | 1.97 CtlIsLarge, SaturationBaseli  |
| blaCMY2-02                 | 15B | 29.05 | 89.1  | 1.97 SaturationBaselineRatiolsL    |
| blaCTX-M-01                | 15B | 31.08 | 82.13 | 1.55 LowEfficiency, CtlIsLarge, S: |
| blaCTX-M-02                | 15B |       |       | NoAmplification                    |
| blaCTX-M-03                | 15B |       |       | LowEfficiency, CtlIsSmall, Ci      |
| blaCTX-M-04                | 15B | 32.66 | 86.44 | 1.6 LowEfficiency, CtlIsLarge, S:  |
| blaCTX-M-05                | 15B |       |       | NoAmplification                    |
| blaCTX-M-06                | 15B |       |       | LowEfficiency, CtlIsSmall, Ci      |
| blaGES                     | 15B |       |       | NoAmplification                    |
| blaIMP-01                  | 15B |       |       | NoAmplification                    |
| blaIMP-02                  | 15B |       |       | NoAmplification                    |
| blaMOX/blaC                | 15B |       |       | NoAmplification                    |
| blaOCH                     | 15B |       |       | NoAmplification                    |
| blaOKP                     | 15B |       |       | NoAmplification                    |
| blaOXA1/blaC               | 15B |       |       | NoAmplification                    |
| blaOXA10-01                | 15B |       |       | NoAmplification                    |
| blaOXA10-02                | 15B |       |       | NoAmplification                    |
| blaOXY                     | 15B |       |       | CurveFitFailed                     |
| blaPAO                     | 15B |       |       | NoAmplification                    |
| blaPER                     | 15B |       |       | NoAmplification                    |
| blaPSE                     | 15B |       |       | NoAmplification                    |
| blaROB                     | 15B |       |       | NoAmplification                    |
| blaSFO                     | 15B | 29.3  | 88.1  | 1.77 LowEfficiency, SaturationB:   |
| blaSHV-01                  | 15B |       |       | NoAmplification                    |
| blaSHV-02                  | 15B | 31.91 | 81.86 | 1.67 LowEfficiency, CtlIsLarge, S: |
| blaTEM                     | 15B | 26.32 | 78.73 | 1.62 LowEfficiency, SaturationB:   |
| blaTLA                     | 15B |       |       | NoAmplification                    |
| blaVEB                     | 15B |       |       | NoAmplification                    |
| blaVIM                     | 15B |       |       | NoAmplification                    |
| blaZ                       | 15B |       |       | NoAmplification                    |
| carB                       | 15B | 34.91 | 77.49 | 1.92 CtlIsLarge, SaturationBaseli  |
| catA1                      | 15B |       |       | NoAmplification                    |
| catB3                      | 15B |       |       | CtlIsLarge, SaturationBaseli       |
| catB8                      | 15B | 30.42 | 83.59 | 1.95 CtlIsLarge, SaturationBaseli  |

|            |     |       |       |      |                              |
|------------|-----|-------|-------|------|------------------------------|
| ceoA       | 15B | 27.63 | 87.02 | 2.13 | SaturationBaselineRatiolsL   |
| cepA       | 15B |       |       |      | NoAmplification              |
| cfiA       | 15B |       |       |      | NoAmplification              |
| cfr        | 15B |       |       |      | NoAmplification              |
| cfxA       | 15B | 22.5  | 77.2  | 1.84 | SaturationBaselineRatiolsL   |
| cmeA       | 15B |       |       |      | NoAmplification              |
| cmlA1-01   | 15B |       |       |      | NoAmplification              |
| cmlA1-02   | 15B |       |       |      | LowEfficiency, CtIsSmall, Ci |
| cmr        | 15B |       |       |      | NoAmplification              |
| cmx(A)     | 15B | 25.61 | 84.59 | 2.06 | SaturationBaselineRatiolsL   |
| cphA-01    | 15B | 32.87 | 88.87 | 1.62 | LowEfficiency, CtIsLarge, S  |
| cphA-02    | 15B | 32.4  | 82.29 | 1.87 | CtIsLarge, SaturationBaseli  |
| dfrA1      | 15B | 34.31 | 78.04 | 2.03 | CtIsLarge, SaturationBaseli  |
| dfrA12     | 15B | 34.02 | 87.97 | 1.96 | CtIsLarge, SaturationBaseli  |
| emrD       | 15B |       |       |      | CurveFitFailed               |
| ereA       | 15B | 34.92 | 83.06 | 1.91 | CtIsLarge, SaturationBaseli  |
| ereB       | 15B | 33.73 | 80.76 | 1.72 | LowEfficiency, CtIsLarge, S  |
| erm(34)    | 15B |       |       |      | NoAmplification              |
| erm(35)    | 15B |       |       |      | NoAmplification              |
| erm(36)    | 15B |       |       |      | CurveFitFailed               |
| ermA       | 15B |       |       |      | NoAmplification              |
| ermA/ermTR | 15B |       |       |      | NoAmplification              |
| ermB       | 15B | 23.22 | 74.48 | 1.93 | SaturationBaselineRatiolsL   |
| ermC       | 15B |       |       |      | NoAmplification              |
| ermF       | 15B |       |       |      | LowEfficiency, CtIsSmall, S  |
| ermJ/ermD  | 15B | 33.12 | 82.56 | 1.77 | LowEfficiency, CtIsLarge, S  |
| ermK-01    | 15B | 32.3  | 82.73 | 1.93 | CtIsLarge, SaturationBaseli  |
| ermK-02    | 15B |       |       |      | CtIsLarge, SaturationBaseli  |
| ermT-01    | 15B |       |       |      | LowEfficiency, CtIsSmall, S  |
| ermT-02    | 15B |       |       |      | LowEfficiency, CtIsSmall, S  |
| ermX       | 15B | 33.65 | 86.91 | 1.85 | CtIsLarge, SaturationBaseli  |
| ermY       | 15B |       |       |      | CurveFitFailed               |
| fabK       | 15B | 24.86 | 78.89 | 2.11 | SaturationBaselineRatiolsL   |
| floR       | 15B |       |       |      | NoAmplification              |
| folA       | 15B |       |       |      | NoAmplification              |
| fosB       | 15B |       |       |      | LowEfficiency, CtIsSmall, Ci |
| fosX       | 15B |       |       |      | NoAmplification              |
| fox5       | 15B | 28.05 | 86.4  | 1.7  | LowEfficiency, SaturationB   |
| imiR       | 15B |       |       |      | NoAmplification              |
| ImrA-01    | 15B |       |       |      | BadR2, LowEfficiency, CtIsS  |
| intl       | 15B | 29.38 | 87.29 | 1.72 | LowEfficiency, SaturationB   |
| intl1      | 15B | 20.27 | 87.17 | 2.12 | SaturationBaselineRatiolsL   |
| IS613      | 15B | 26.31 | 79.23 | 1.72 | LowEfficiency, SaturationB   |
| lnuA-01    | 15B |       |       |      | NoAmplification              |
| lnuB-01    | 15B |       |       |      | NoAmplification              |
| lnuB-02    | 15B |       |       |      | NoAmplification              |

|                |     |       |       |      |                              |
|----------------|-----|-------|-------|------|------------------------------|
| lnuC           | 15B |       |       |      | BadR2, LowEfficiency, CtIsS  |
| marR-01        | 15B | 31.32 | 85.2  | 1.88 | CtIsLarge, SaturationBaseli  |
| matA/mel       | 15B | 20.78 | 77.23 | 2.09 | SaturationBaselineRatiolsL   |
| mdet1          | 15B |       |       |      | NoAmplification              |
| mdtA           | 15B |       |       |      | CurveFitFailed               |
| mdtE/yhiU      | 15B |       |       |      | LowEfficiency, CtIsSmall, S: |
| mecA           | 15B |       |       |      | NoAmplification              |
| mefA           | 15B | 20.71 | 80.41 | 2.14 | SaturationBaselineRatiolsL   |
| mepA           | 15B | 32.68 | 84.52 | 1.8  | CtIsLarge, SaturationBaseli  |
| mexA           | 15B |       |       |      | CurveFitFailed               |
| mexD           | 15B |       |       |      | CtIsLarge, SaturationBaseli  |
| mexE           | 15B | 32.97 | 88.71 | 1.97 | CtIsLarge, SaturationBaseli  |
| mexF           | 15B |       |       |      | CurveFitFailed               |
| mphA-01        | 15B | 29.54 | 86.68 | 1.93 | CtIsLarge, SaturationBaseli  |
| mphA-02        | 15B | 29.62 | 86.63 | 1.56 | LowEfficiency, CtIsLarge, S: |
| mphB           | 15B |       |       |      | LowEfficiency, CtIsSmall, S: |
| mphC           | 15B |       |       |      | CurveFitFailed               |
| msrA-01        | 15B | 31.31 | 76.05 | 2    | CtIsLarge, SaturationBaseli  |
| msrC-01        | 15B |       |       |      | NoAmplification              |
| mtrC-01        | 15B |       |       |      | CurveFitFailed               |
| mtrC-02        | 15B |       |       |      | NoAmplification              |
| mtrD-02        | 15B | 21.21 | 80.17 | 2.11 | SaturationBaselineRatiolsL   |
| mtrD-03        | 15B | 20.84 | 80.48 | 1.72 | LowEfficiency, SaturationB:  |
| NDM1           | 15B |       |       |      | NoAmplification              |
| nimE           | 15B |       |       |      | LowEfficiency, CtIsSmall, S: |
| nisB           | 15B |       |       |      | NoAmplification              |
| oleC           | 15B |       |       |      | CurveFitFailed               |
| oprD           | 15B | 27.66 | 86.6  | 2.12 | SaturationBaselineRatiolsL   |
| oprJ           | 15B | 33.65 | 87.65 | 1.82 | CtIsLarge, SaturationBaseli  |
| pbp            | 15B |       |       |      | NoAmplification              |
| pbp2x          | 15B | 25.53 | 74.54 | 1.78 | LowEfficiency, SaturationB:  |
| Pbp5           | 15B |       |       |      | NoAmplification              |
| penA           | 15B | 20.86 | 80.73 | 1.93 | SaturationBaselineRatiolsL   |
| pikR1          | 15B |       |       |      | CurveFitFailed               |
| pikR2          | 15B | 30.94 | 84.64 | 1.65 | LowEfficiency, CtIsLarge, S: |
| pmrA           | 15B | 22.68 | 78.89 | 2.02 | SaturationBaselineRatiolsL   |
| pncA           | 15B | 30.92 | 89.02 | 1.68 | LowEfficiency, CtIsLarge, S: |
| putative multi | 15B |       |       |      | NoAmplification              |
| qac            | 15B |       |       |      | CurveFitFailed               |
| qacA           | 15B |       |       |      | NoAmplification              |
| qacA/qacB      | 15B |       |       |      | LowEfficiency, CtIsSmall, S: |
| qacEdelta1-0   | 15B |       |       |      | NoAmplification              |
| qacEdelta1-0   | 15B | 28.67 | 87.49 | 1.9  | SaturationBaselineRatiolsL   |
| qacH-01        | 15B | 32.99 | 85.81 | 2    | CtIsLarge, SaturationBaseli  |
| qacH-02        | 15B | 34.3  | 83.76 | 1.72 | LowEfficiency, CtIsLarge, S: |
| qnrA           | 15B | 34.34 | 85.63 | 1.96 | CtIsLarge, SaturationBaseli  |



|              |     |       |       |      |                              |
|--------------|-----|-------|-------|------|------------------------------|
| rarD-02      | 15B |       |       |      | LowEfficiency, CtIsSmall, S: |
| sat4         | 15B | 25.64 | 74.45 | 1.95 | SaturationBaselineRatiolsL   |
| sdeB         | 15B |       |       |      | NoAmplification              |
| spcN-01      | 15B |       |       |      | NoAmplification              |
| speA         | 15B |       |       |      | NoAmplification              |
| str          | 15B |       |       |      | NoAmplification              |
| strA         | 15B |       |       |      | NoAmplification              |
| strB         | 15B |       |       |      | NoAmplification              |
| sul1         | 15B | 34.06 | 88.68 | 1.78 | LowEfficiency, CtIsLarge, S: |
| sul2         | 15B |       |       |      | LowEfficiency, CtIsSmall, Ci |
| sulA/foIP-01 | 15B | 20.98 | 81.2  | 2.18 | SaturationBaselineRatiolsL   |
| sulA/foIP-03 | 15B | 20.71 | 82.76 | 2.19 | SaturationBaselineRatiolsL   |
| tet(32)      | 15B | 26.8  | 80.89 | 1.91 | SaturationBaselineRatiolsL   |
| tet(34)      | 15B |       |       |      | LowEfficiency, CtIsSmall, S: |
| tet(35)      | 15B | 28.82 | 76.76 | 1.87 | SaturationBaselineRatiolsL   |
| tet(36)-A    | 15B |       |       |      | LowEfficiency, CtIsSmall, S: |
| tet(36)-B    | 15B |       |       |      | NoAmplification              |
| tet(37)      | 15B | 27.21 | 86.27 | 2.03 | SaturationBaselineRatiolsL   |
| tetA-01      | 15B | 22.08 | 82.83 | 2.15 | SaturationBaselineRatiolsL   |
| tetA-02      | 15B | 31.84 | 89.74 | 1.86 | CtIsLarge, SaturationBaseli  |
| tetB-01      | 15B | 30.59 | 87.29 | 1.76 | LowEfficiency, CtIsLarge, S: |
| tetB-02      | 15B | 32.93 | 83.13 | 1.84 | CtIsLarge, SaturationBaseli  |
| tetC-01      | 15B |       |       |      | NoAmplification              |
| tetC-02      | 15B |       |       |      | LowEfficiency, CtIsSmall, Ci |
| tetD-01      | 15B |       |       |      | NoAmplification              |
| tetD-02      | 15B |       |       |      | BadR2, LowEfficiency, CtIsS  |
| tetE         | 15B |       |       |      | LowEfficiency, CtIsSmall, Ci |
| tetG-01      | 15B |       |       |      | LowEfficiency, CtIsSmall, Ci |
| tetG-02      | 15B |       |       |      | LowEfficiency, CtIsSmall, Ci |
| tetH         | 15B |       |       |      | NoAmplification              |
| tetJ         | 15B |       |       |      | NoAmplification              |
| tetK         | 15B |       |       |      | NoAmplification              |
| tetL-01      | 15B |       |       |      | NoAmplification              |
| tetL-02      | 15B |       |       |      | CurveFitFailed               |
| tetM-01      | 15B |       |       |      | LowEfficiency, CtIsSmall, S: |
| tetM-02      | 15B | 22.25 | 77.2  | 2.29 | SaturationBaselineRatiolsL   |
| tetO-01      | 15B | 27.89 | 76.26 | 2.04 | SaturationBaselineRatiolsL   |
| tetPA        | 15B |       |       |      | NoAmplification              |
| tetPB-01     | 15B |       |       |      | LowEfficiency, CtIsSmall, S: |
| tetPB-02     | 15B | 28    | 84.44 | 2.1  | SaturationBaselineRatiolsL   |
| tetPB-03     | 15B |       |       |      | LowEfficiency, CtIsSmall, Ci |
| tetPB-05     | 15B |       |       |      | LowEfficiency, CtIsSmall, Ci |
| tetQ         | 15B | 25.26 | 75.6  | 1.99 | SaturationBaselineRatiolsL   |
| tetR-02      | 15B | 30.53 | 88.69 | 1.73 | LowEfficiency, CtIsLarge, S: |
| tetR-03      | 15B |       |       |      | NoAmplification              |
| tetS         | 15B |       |       |      | LowEfficiency, CtIsSmall, S: |

|             |     |       |       |      |                              |
|-------------|-----|-------|-------|------|------------------------------|
| tetT        | 15B |       |       |      | NoAmplification              |
| tetU-01     | 15B |       |       |      | NoAmplification              |
| tetV        | 15B |       |       |      | NoAmplification              |
| tetW-01     | 15B | 25.75 | 81.72 | 2.02 | SaturationBaselineRatiolsL   |
| tetX        | 15B |       |       |      | NoAmplification              |
| tnpA-01     | 15B |       |       |      | NoAmplification              |
| tnpA-02     | 15B | 33.08 | 86.97 | 1.75 | LowEfficiency, CtIsLarge, S: |
| tnpA-03     | 15B |       |       |      | NoAmplification              |
| tnpA-04     | 15B |       |       |      | CurveFitFailed               |
| tnpA-05     | 15B |       |       |      | NoAmplification              |
| tnpA-07     | 15B |       |       |      | NoAmplification              |
| tolC-01     | 15B |       |       |      | NoAmplification              |
| tolC-02     | 15B | 29.77 | 87.62 | 1.98 | CtIsLarge, SaturationBaseli  |
| tolC-03     | 15B | 30.17 | 87.64 | 1.95 | CtIsLarge, SaturationBaseli  |
| Tp614       | 15B |       |       |      | CurveFitFailed               |
| ttgA        | 15B |       |       |      | CtIsLarge, SaturationBaseli  |
| ttgB        | 15B |       |       |      | LowEfficiency, CtIsSmall, S: |
| vanA        | 15B |       |       |      | NoAmplification              |
| vanB-01     | 15B | 29.8  | 90.46 | 1.96 | CtIsLarge, SaturationBaseli  |
| vanC-01     | 15B |       |       |      | NoAmplification              |
| vanC-02     | 15B |       |       |      | NoAmplification              |
| vanC-03     | 15B | 25.82 | 86.01 | 2.04 | SaturationBaselineRatiolsL   |
| vanC1       | 15B |       |       |      | NoAmplification              |
| vanC2/vanC3 | 15B | 30.81 | 84.71 | 1.65 | LowEfficiency, CtIsLarge, S: |
| vanG        | 15B |       |       |      | BadR2, LowEfficiency, CtIsS  |
| vanHB       | 15B | 33.45 | 78.39 | 1.74 | LowEfficiency, CtIsLarge, S: |
| vanHD       | 15B | 33.11 | 89.08 | 1.78 | LowEfficiency, CtIsLarge, S: |
| vanRA-01    | 15B |       |       |      | NoAmplification              |
| vanRA-02    | 15B |       |       |      | NoAmplification              |
| vanRB       | 15B | 33.17 | 80.6  | 1.58 | LowEfficiency, CtIsLarge, S: |
| vanRC       | 15B |       |       |      | NoAmplification              |
| vanRC4      | 15B |       |       |      | NoAmplification              |
| vanRD       | 15B |       |       |      | NoAmplification              |
| vanSA       | 15B |       |       |      | LowEfficiency, CtIsSmall, C: |
| vanSB       | 15B | 29.75 | 73.81 | 1.9  | CtIsLarge, SaturationBaseli  |
| vanSC-01    | 15B |       |       |      | CurveFitFailed               |
| vanSC-02    | 15B |       |       |      | NoAmplification              |
| vanTC-01    | 15B |       |       |      | NoAmplification              |
| vanTC-02    | 15B |       |       |      | NoAmplification              |
| vanTE       | 15B |       |       |      | LowEfficiency, CtIsSmall, C: |
| vanTG       | 15B |       |       |      | CurveFitFailed               |
| vanWB       | 15B |       |       |      | NoAmplification              |
| vanWG       | 15B | 32.91 | 74.37 | 1.92 | CtIsLarge, SaturationBaseli  |
| vanXA       | 15B |       |       |      | NoAmplification              |
| vanXB       | 15B |       |       |      | NoAmplification              |
| vanXD       | 15B | 31.65 | 74.58 | 1.95 | CtIsLarge, SaturationBaseli  |

|              |     |       |       |      |                              |
|--------------|-----|-------|-------|------|------------------------------|
| vanYB        | 15B | 33.47 | 78.47 | 1.9  | CtIsLarge, SaturationBaseli  |
| vanYD-01     | 15B | 31.09 | 82.59 | 1.73 | LowEfficiency, CtIsLarge, S: |
| vanYD-02     | 15B |       |       |      | LowEfficiency, CtIsSmall, S: |
| vatB-01      | 15B |       |       |      | NoAmplification              |
| vatB-02      | 15B | 32.09 | 75.25 | 1.79 | LowEfficiency, CtIsLarge, S: |
| vatC-01      | 15B |       |       |      | NoAmplification              |
| vatC-02      | 15B | 33.84 | 86.88 | 1.99 | CtIsLarge, SaturationBaseli  |
| vatE-01      | 15B | 30.92 | 76.76 | 1.94 | CtIsLarge, SaturationBaseli  |
| vatE-02      | 15B |       |       |      | NoAmplification              |
| vgaA-01      | 15B |       |       |      | NoAmplification              |
| vgaA-02      | 15B |       |       |      | LowEfficiency, CtIsSmall, C: |
| vgb-01       | 15B | 34.12 | 88.25 | 1.84 | CtIsLarge, SaturationBaseli  |
| vgbB-01      | 15B |       |       |      | LowEfficiency, CtIsSmall, S: |
| vgbB-02      | 15B |       |       |      | NoAmplification              |
| yceE/mdtG-0  | 15B |       |       |      | NoAmplification              |
| yceE/mdtG-0  | 15B |       |       |      | CurveFitFailed               |
| yceL/mdtH-0  | 15B | 29.46 | 87.21 | 1.71 | LowEfficiency, SaturationB:  |
| yceL/mdtH-0  | 15B |       |       |      | NoAmplification              |
| yceL/mdtH-0  | 15B | 34.34 | 88.11 | 2.01 | CtIsLarge, SaturationBaseli  |
| yidY/mdtL-01 | 15B | 32.62 | 87.68 | 1.93 | CtIsLarge, SaturationBaseli  |
| yidY/mdtL-02 | 15B |       |       |      | NoAmplification              |































| Assay          | Sample | Ct | Tm    | Efficiency | flag                   |
|----------------|--------|----|-------|------------|------------------------|
| 16S rRNA       | 15C    |    | 14.02 | 82.11      | 2.05                   |
| aac            | 15C    |    | 30.7  | 84.36      | 1.82 MultipleMeltPeaks |
| aac(6')-Ib(akz | 15C    |    | 36.94 | 85.78      | 1.8                    |
| aac(6')-Ib(akz | 15C    |    | 30.29 | 84.73      | 1.98 MultipleMeltPeaks |
| aac(6')-Ib(akz | 15C    |    | 33.57 | 85.95      | 1.92                   |
| aac(6')-II     | 15C    |    | 37.61 | 80.71      | 1.57 MultipleMeltPeaks |
| aac(6')I1      | 15C    |    | 33.99 | 89.98      | 1.82 MultipleMeltPeaks |
| aacA/aphD      | 15C    |    |       |            | CurveFitFailed         |
| aacC           | 15C    |    | 25.76 | 88.45      | 2.01                   |
| aacC1          | 15C    |    | 40.66 | 89.32      | 1.65 MultipleMeltPeaks |
| aacC2          | 15C    |    |       |            | NoAmplification        |
| aacC4          | 15C    |    | 28.68 | 91.22      | 2.1                    |
| aadA-01        | 15C    |    |       |            | CurveFitFailed         |
| aadA-02        | 15C    |    | 38.94 | 80.37      | 1.71 MultipleMeltPeaks |
| aadA-1-01      | 15C    |    | 26.17 | 79.93      | 1.93                   |
| aadA-1-02      | 15C    |    | 24.71 | 76.13      | 1.97                   |
| aadA1          | 15C    |    | 40.14 | 81.41      | 1.77 MultipleMeltPeaks |
| aadA2-01       | 15C    |    | 40.29 | 84.84      | 1.53 MultipleMeltPeaks |
| aadA2-02       | 15C    |    | 32.67 | 74.73      | 1.77 MultipleMeltPeaks |
| aadA2-03       | 15C    |    | 34.11 | 86.37      | 1.9                    |
| aadA5-01       | 15C    |    | 33.96 | 78.04      | 1.95 MultipleMeltPeaks |
| aadA5-02       | 15C    |    | 29.15 | 83.78      | 1.98 MultipleMeltPeaks |
| aadA9-01       | 15C    |    | 31.36 | 89.17      | 2.01 MultipleMeltPeaks |
| aadA9-02       | 15C    |    | 38.45 | 82.44      | 1.82 MultipleMeltPeaks |
| aadD           | 15C    |    |       |            | CurveFitFailed         |
| aadE           | 15C    |    | 24.67 | 72.17      | 2.1                    |
| acrA-01        | 15C    |    | 31.29 | 88.43      | 1.97 MultipleMeltPeaks |
| acrA-02        | 15C    |    | 31.25 | 87.7       | 1.93 MultipleMeltPeaks |
| acrA-03        | 15C    |    | 38.67 | 83.6       | 1.62 MultipleMeltPeaks |
| acrA-04        | 15C    |    | 29.47 | 84.12      | 2.01 MultipleMeltPeaks |
| acrA-05        | 15C    |    | 27.24 | 88.07      | 2 MultipleMeltPeaks    |
| acrB-01        | 15C    |    | 31.76 | 89.62      | 2.01                   |
| acrF           | 15C    |    | 30.92 | 81.99      | 1.92                   |
| acrR-01        | 15C    |    | 32.1  | 90.69      | 1.89 MultipleMeltPeaks |
| acrR-02        | 15C    |    | 39.46 | 85.43      | 1.73 MultipleMeltPeaks |
| Actin          | 15C    |    | 21.74 | 87.08      | 2                      |
| adeA           | 15C    |    |       |            | CurveFitFailed         |
| ampC-01        | 15C    |    | 28.3  | 90.8       | 2                      |
| ampC-02        | 15C    |    | 32.56 | 84.3       | 2.02                   |
| ampC-04        | 15C    |    | 30.35 | 86.42      | 1.75 MultipleMeltPeaks |
| ampC-05        | 15C    |    |       |            | CurveFitFailed         |
| ampC-06        | 15C    |    | 36.06 | 83.58      | 1.91                   |
| ampC-07        | 15C    |    | 30.88 | 88.5       | 2.02                   |
| ampC-09        | 15C    |    | 35.74 | 85.9       | 1.65 MultipleMeltPeaks |
| ampC/blaDH     | 15C    |    | 32.1  | 89.95      | 1.96                   |

|                          |     |       |       |      |                                          |
|--------------------------|-----|-------|-------|------|------------------------------------------|
| aph                      | 15C |       |       |      | CurveFitFailed                           |
| aph(2')-Id-01            | 15C |       |       |      | LowEfficiency, CtIsSmall, S <sub>e</sub> |
| aph(2')-Id-02            | 15C |       |       |      | LowEfficiency, CtIsSmall, S <sub>e</sub> |
| aph6ia                   | 15C | 36.05 | 75.25 | 1.87 | MultipleMeltPeaks                        |
| aphA1(aka k <sub>a</sub> | 15C |       |       |      | LowEfficiency, CtIsSmall, S <sub>e</sub> |
| bacA-01                  | 15C | 33.74 | 87.55 | 1.88 | MultipleMeltPeaks                        |
| bacA-02                  | 15C | 29.93 | 83.15 | 1.71 |                                          |
| BETA-globin              | 15C | 22.7  | 84.09 | 2    |                                          |
| bla-ACC-1                | 15C | 32.41 | 84.39 | 1.95 | MultipleMeltPeaks                        |
| bla-L1                   | 15C | 30.7  | 85.96 | 1.97 | MultipleMeltPeaks                        |
| bla1                     | 15C |       |       |      | LowEfficiency, CtIsSmall, C <sub>i</sub> |
| blaCMY                   | 15C | 34.09 | 79.7  | 1.93 |                                          |
| blaCMY2-01               | 15C | 33.58 | 75.05 | 2.08 |                                          |
| blaCMY2-02               | 15C | 28.76 | 85.28 | 1.99 | MultipleMeltPeaks                        |
| blaCTX-M-01              | 15C | 31.83 | 87.03 | 2.02 |                                          |
| blaCTX-M-02              | 15C | 29.85 | 89.91 | 1.93 |                                          |
| blaCTX-M-03              | 15C |       |       |      | CurveFitFailed                           |
| blaCTX-M-04              | 15C | 27.7  | 87.49 | 2.05 |                                          |
| blaCTX-M-05              | 15C | 38.06 | 75.29 | 1.5  |                                          |
| blaCTX-M-06              | 15C | 40.64 | 86.18 | 1.77 | MultipleMeltPeaks                        |
| blaGES                   | 15C |       |       |      | LowEfficiency, CtIsSmall, S <sub>e</sub> |
| blaIMP-01                | 15C |       |       |      | LowEfficiency, CtIsSmall, C <sub>i</sub> |
| blaIMP-02                | 15C |       |       |      | CurveFitFailed                           |
| blaMOX/blaC              | 15C | 39.54 | 81.19 | 1.73 | MultipleMeltPeaks                        |
| blaOCH                   | 15C |       |       |      | NoAmplification                          |
| blaOKP                   | 15C |       |       |      | NoAmplification                          |
| blaOXA1/blaC             | 15C |       |       |      | CurveFitFailed                           |
| blaOXA10-01              | 15C |       |       |      | CurveFitFailed                           |
| blaOXA10-02              | 15C | 37.27 | 83.9  | 1.9  |                                          |
| blaOXY                   | 15C | 34.51 | 89.63 | 1.69 |                                          |
| blaPAO                   | 15C | 31.84 | 86.06 | 1.99 |                                          |
| blaPER                   | 15C |       |       |      | CurveFitFailed                           |
| blaPSE                   | 15C |       |       |      | CurveFitFailed                           |
| blaROB                   | 15C | 34.83 | 78.68 | 1.83 | MultipleMeltPeaks                        |
| blaSFO                   | 15C | 30.32 | 88.33 | 1.83 | MultipleMeltPeaks                        |
| blaSHV-01                | 15C | 32.21 | 87.91 | 1.75 |                                          |
| blaSHV-02                | 15C | 33.82 | 87.26 | 1.96 |                                          |
| blaTEM                   | 15C | 21.95 | 79.3  | 1.98 |                                          |
| blaTLA                   | 15C |       |       |      | LowEfficiency, CtIsSmall, S <sub>e</sub> |
| blaVEB                   | 15C |       |       |      | BadR2, LowEfficiency, CtIsS <sub>e</sub> |
| blaVIM                   | 15C | 36.09 | 88.32 | 1.91 | MultipleMeltPeaks                        |
| blaZ                     | 15C |       |       |      | LowEfficiency, CtIsSmall, C <sub>i</sub> |
| carB                     | 15C | 36.83 | 87.29 | 1.83 | MultipleMeltPeaks                        |
| catA1                    | 15C |       |       |      | NoAmplification                          |
| catB3                    | 15C |       |       |      | CurveFitFailed                           |
| catB8                    | 15C | 29.55 | 81.53 | 2.02 | MultipleMeltPeaks                        |

|            |     |       |       |      |                              |
|------------|-----|-------|-------|------|------------------------------|
| ceoA       | 15C | 29.01 | 88.67 | 2.05 | MultipleMeltPeaks            |
| cepA       | 15C |       |       |      | NoAmplification              |
| cfiA       | 15C | 29.15 | 86.24 | 2.07 | MultipleMeltPeaks            |
| cfr        | 15C |       |       |      | LowEfficiency, CtIsSmall, S: |
| cfxA       | 15C | 19.36 | 77.5  | 2.02 |                              |
| cmeA       | 15C |       |       |      | LowEfficiency, CtIsSmall, S: |
| cmlA1-01   | 15C | 30.03 | 89.83 | 1.97 |                              |
| cmlA1-02   | 15C | 30.51 | 89.84 | 1.94 |                              |
| cmr        | 15C |       |       |      | LowEfficiency, CtIsSmall, S: |
| cmx(A)     | 15C | 27.78 | 87.07 | 1.96 | MultipleMeltPeaks            |
| cphA-01    | 15C |       |       |      | NoAmplification              |
| cphA-02    | 15C | 29.26 | 82.33 | 1.94 |                              |
| dfrA1      | 15C | 37.66 | 79.26 | 1.78 |                              |
| dfrA12     | 15C | 38.48 | 77.31 | 1.65 | MultipleMeltPeaks            |
| emrD       | 15C | 34.85 | 89.29 | 1.78 |                              |
| ereA       | 15C |       |       |      | CurveFitFailed               |
| ereB       | 15C | 32.81 | 83.95 | 1.96 | MultipleMeltPeaks            |
| erm(34)    | 15C | 30.2  | 90.88 | 2.01 |                              |
| erm(35)    | 15C |       |       |      | CurveFitFailed               |
| erm(36)    | 15C | 28.67 | 90.61 | 2.05 |                              |
| ermA       | 15C |       |       |      | CurveFitFailed               |
| ermA/ermTR | 15C |       |       |      | NoAmplification              |
| ermB       | 15C | 20.26 | 74.89 | 2    |                              |
| ermC       | 15C |       |       |      | LowEfficiency, CtIsSmall, S: |
| ermF       | 15C | 39.63 | 70.77 | 1.85 |                              |
| ermJ/ermD  | 15C |       |       |      | CurveFitFailed               |
| ermK-01    | 15C | 34.6  | 73.49 | 1.99 | MultipleMeltPeaks            |
| ermK-02    | 15C | 35.48 | 88.72 | 1.86 | MultipleMeltPeaks            |
| ermT-01    | 15C |       |       |      | LowEfficiency, CtIsSmall, S: |
| ermT-02    | 15C |       |       |      | LowEfficiency, CtIsSmall, S: |
| ermX       | 15C |       |       |      | CurveFitFailed               |
| ermY       | 15C |       |       |      | LowEfficiency, CtIsSmall, C: |
| fabK       | 15C | 24.58 | 79.41 | 2.19 |                              |
| floR       | 15C | 31.25 | 89.06 | 2.02 |                              |
| folA       | 15C | 35.01 | 83.83 | 1.83 |                              |
| fosB       | 15C |       |       |      | LowEfficiency, CtIsSmall, S: |
| fosX       | 15C |       |       |      | LowEfficiency, CtIsSmall, C: |
| fox5       | 15C | 25.83 | 87.24 | 1.96 |                              |
| imiR       | 15C |       |       |      | NoAmplification              |
| ImrA-01    | 15C |       |       |      | LowEfficiency, CtIsSmall, S: |
| intl       | 15C | 30.3  | 84.85 | 1.86 | MultipleMeltPeaks            |
| intl1      | 15C | 20.05 | 87.04 | 1.97 |                              |
| IS613      | 15C | 21.11 | 79.54 | 1.79 |                              |
| lnuA-01    | 15C |       |       |      | LowEfficiency, CtIsSmall, S: |
| lnuB-01    | 15C |       |       |      | LowEfficiency, CtIsSmall, S: |
| lnuB-02    | 15C |       |       |      | CurveFitFailed               |

|                |     |       |       |      |                              |
|----------------|-----|-------|-------|------|------------------------------|
| lnuC           | 15C | 33.7  | 87.72 | 1.8  |                              |
| marR-01        | 15C | 30.15 | 87.68 | 1.93 | MultipleMeltPeaks            |
| matA/mel       | 15C | 17.33 | 77.75 | 2.07 |                              |
| mdet1          | 15C |       |       |      | LowEfficiency, CtIsSmall, S: |
| mdtA           | 15C | 32.18 | 83.15 | 1.86 |                              |
| mdtE/yhiU      | 15C | 30.21 | 90.73 | 1.9  | MultipleMeltPeaks            |
| mecA           | 15C |       |       |      | LowEfficiency, CtIsSmall, S: |
| mefA           | 15C | 16.52 | 80.44 | 2.03 |                              |
| mepA           | 15C | 29.1  | 87.84 | 2.05 |                              |
| mexA           | 15C | 32.27 | 88.99 | 1.98 |                              |
| mexD           | 15C | 35.96 | 79.64 | 1.94 |                              |
| mexE           | 15C | 33.1  | 86.91 | 1.98 | MultipleMeltPeaks            |
| mexF           | 15C | 25.19 | 85.69 | 2.01 | MultipleMeltPeaks            |
| mphA-01        | 15C | 26.12 | 89.09 | 1.95 |                              |
| mphA-02        | 15C | 28.41 | 87.29 | 1.74 |                              |
| mphB           | 15C | 30.39 | 85.35 | 1.98 | MultipleMeltPeaks            |
| mphC           | 15C |       |       |      | LowEfficiency, CtIsSmall, S: |
| msrA-01        | 15C | 35.91 | 72.4  | 1.99 |                              |
| msrC-01        | 15C |       |       |      | NoAmplification              |
| mtrC-01        | 15C | 33.48 | 82.44 | 2.03 | MultipleMeltPeaks            |
| mtrC-02        | 15C | 34.31 | 84.28 | 2.04 |                              |
| mtrD-02        | 15C | 26.9  | 81.66 | 1.96 |                              |
| mtrD-03        | 15C | 26.66 | 84.2  | 1.83 |                              |
| NDM1           | 15C |       |       |      | LowEfficiency, CtIsSmall, S: |
| nimE           | 15C |       |       |      | LowEfficiency, CtIsSmall, S: |
| nisB           | 15C |       |       |      | CurveFitFailed               |
| oleC           | 15C | 33.17 | 87.42 | 1.92 | MultipleMeltPeaks            |
| oprD           | 15C | 27.31 | 89.04 | 2.03 |                              |
| oprJ           | 15C | 26.88 | 88.01 | 1.95 | MultipleMeltPeaks            |
| pbp            | 15C |       |       |      | LowEfficiency, CtIsSmall, C: |
| pbp2x          | 15C | 23.83 | 75.27 | 2    |                              |
| Pbp5           | 15C |       |       |      | LowEfficiency, CtIsSmall, S: |
| penA           | 15C | 31.62 | 88.62 | 1.98 | MultipleMeltPeaks            |
| pikR1          | 15C | 36.3  | 88.6  | 1.82 | MultipleMeltPeaks            |
| pikR2          | 15C | 29.93 | 84.63 | 2.05 | MultipleMeltPeaks            |
| pmrA           | 15C | 20    | 78.85 | 2.11 |                              |
| pncA           | 15C | 25.57 | 84.46 | 1.94 | MultipleMeltPeaks            |
| putative multi | 15C | 30.29 | 84.1  | 1.98 |                              |
| qac            | 15C |       |       |      | CurveFitFailed               |
| qacA           | 15C | 33.91 | 70.63 | 1.78 |                              |
| qacA/qacB      | 15C |       |       |      | LowEfficiency, CtIsSmall, C: |
| qacEdelta1-0   | 15C |       |       |      | CurveFitFailed               |
| qacEdelta1-0   | 15C | 31.03 | 85.91 | 2    | MultipleMeltPeaks            |
| qacH-01        | 15C | 28.92 | 88.12 | 1.92 |                              |
| qacH-02        | 15C | 33.31 | 86.62 | 1.81 |                              |
| qnrA           | 15C |       |       |      | CurveFitFailed               |

|              |     |       |       |      |                              |
|--------------|-----|-------|-------|------|------------------------------|
| rarD-02      | 15C | 32.02 | 85.87 | 2.01 |                              |
| sat4         | 15C | 25.86 | 74.97 | 2.02 |                              |
| sdeB         | 15C |       |       |      | CurveFitFailed               |
| spcN-01      | 15C |       |       |      | CurveFitFailed               |
| speA         | 15C |       |       |      | NoAmplification              |
| str          | 15C |       |       |      | CurveFitFailed               |
| strA         | 15C |       |       |      | CurveFitFailed               |
| strB         | 15C | 36.68 | 85.71 | 1.82 |                              |
| sul1         | 15C | 31.89 | 89.33 | 1.86 |                              |
| sul2         | 15C | 34.83 | 87.43 | 1.79 | MultipleMeltPeaks            |
| sulA/foIP-01 | 15C | 19.21 | 80.99 | 1.98 |                              |
| sulA/foIP-03 | 15C | 17.87 | 82.76 | 2.07 |                              |
| tet(32)      | 15C | 24.6  | 81.46 | 2.01 |                              |
| tet(34)      | 15C | 29.8  | 81.49 | 2.01 |                              |
| tet(35)      | 15C | 33.85 | 79.06 | 1.92 |                              |
| tet(36)-A    | 15C | 35.82 | 87.05 | 1.8  | MultipleMeltPeaks            |
| tet(36)-B    | 15C |       |       |      | LowEfficiency, CtIsSmall, S: |
| tet(37)      | 15C | 24.04 | 76.42 | 2.01 |                              |
| tetA-01      | 15C | 30.24 | 85.09 | 1.96 |                              |
| tetA-02      | 15C | 28.91 | 87.92 | 1.95 |                              |
| tetB-01      | 15C | 33.01 | 86.08 | 1.96 |                              |
| tetB-02      | 15C | 36.24 | 76.08 | 1.86 |                              |
| tetC-01      | 15C |       |       |      | NoAmplification              |
| tetC-02      | 15C | 36.32 | 75.61 | 1.88 |                              |
| tetD-01      | 15C |       |       |      | LowEfficiency, CtIsSmall, S: |
| tetD-02      | 15C | 34.82 | 76.28 | 1.83 | MultipleMeltPeaks            |
| tetE         | 15C | 39.61 | 86.28 | 1.85 |                              |
| tetG-01      | 15C | 28.02 | 89.92 | 1.98 |                              |
| tetG-02      | 15C | 27.19 | 80.86 | 2.02 | MultipleMeltPeaks            |
| tetH         | 15C |       |       |      | LowEfficiency, CtIsSmall, S: |
| tetJ         | 15C | 34.84 | 80.26 | 1.93 |                              |
| tetK         | 15C |       |       |      | CurveFitFailed               |
| tetL-01      | 15C | 38.98 | 81.02 | 1.7  | MultipleMeltPeaks            |
| tetL-02      | 15C | 30.48 | 82.71 | 1.96 |                              |
| tetM-01      | 15C | 17.18 | 76.1  | 2.07 |                              |
| tetM-02      | 15C | 18.68 | 77.59 | 2.06 |                              |
| tetO-01      | 15C | 26.33 | 76.86 | 2.06 |                              |
| tetPA        | 15C |       |       |      | NoAmplification              |
| tetPB-01     | 15C | 33.39 | 88.77 | 1.95 | MultipleMeltPeaks            |
| tetPB-02     | 15C | 27.09 | 84.4  | 2.04 |                              |
| tetPB-03     | 15C |       |       |      | CurveFitFailed               |
| tetPB-05     | 15C |       |       |      | CurveFitFailed               |
| tetQ         | 15C | 20.43 | 76.18 | 2.07 |                              |
| tetR-02      | 15C | 27.98 | 89.06 | 1.85 | MultipleMeltPeaks            |
| tetR-03      | 15C |       |       |      | LowEfficiency, CtIsSmall, S: |
| tetS         | 15C | 30.29 | 85.69 | 2.26 |                              |

|             |     |       |       |      |                             |
|-------------|-----|-------|-------|------|-----------------------------|
| tetT        | 15C |       |       |      | CurveFitFailed              |
| tetU-01     | 15C |       |       |      | LowEfficiency, CtIsSmall, S |
| tetV        | 15C | 36.01 | 90.55 | 1.75 |                             |
| tetW-01     | 15C | 19.9  | 81.96 | 2    |                             |
| tetX        | 15C |       |       |      | BadR2, LowEfficiency, CtIsS |
| tnpA-01     | 15C |       |       |      | LowEfficiency, CtIsSmall, S |
| tnpA-02     | 15C | 39.3  | 89.07 | 1.72 | MultipleMeltPeaks           |
| tnpA-03     | 15C |       |       |      | LowEfficiency, CtIsSmall, S |
| tnpA-04     | 15C | 38.09 | 80.23 | 1.82 |                             |
| tnpA-05     | 15C |       |       |      | LowEfficiency, CtIsSmall, S |
| tnpA-07     | 15C |       |       |      | LowEfficiency, CtIsSmall, C |
| tolC-01     | 15C | 35.19 | 80.15 | 1.81 | MultipleMeltPeaks           |
| tolC-02     | 15C | 26.83 | 87.44 | 1.94 |                             |
| tolC-03     | 15C | 30.6  | 87.35 | 1.98 |                             |
| Tp614       | 15C | 39.17 | 72.85 | 1.83 |                             |
| ttgA        | 15C | 35.8  | 88.33 | 1.79 | MultipleMeltPeaks           |
| ttgB        | 15C | 30.11 | 84.08 | 1.99 |                             |
| vanA        | 15C |       |       |      | NoAmplification             |
| vanB-01     | 15C | 31.63 | 90.79 | 1.9  | MultipleMeltPeaks           |
| vanC-01     | 15C | 34.33 | 76.73 | 2.07 |                             |
| vanC-02     | 15C |       |       |      | CurveFitFailed              |
| vanC-03     | 15C | 24.44 | 86.34 | 1.99 |                             |
| vanC1       | 15C |       |       |      | NoAmplification             |
| vanC2/vanC3 | 15C | 33.06 | 87.5  | 2.15 |                             |
| vanG        | 15C |       |       |      | NoAmplification             |
| vanHB       | 15C | 29.17 | 86.07 | 1.82 | MultipleMeltPeaks           |
| vanHD       | 15C | 31.94 | 87.14 | 1.99 |                             |
| vanRA-01    | 15C |       |       |      | LowEfficiency, CtIsSmall, C |
| vanRA-02    | 15C |       |       |      | LowEfficiency, CtIsSmall, S |
| vanRB       | 15C | 31.34 | 88.24 | 2.32 |                             |
| vanRC       | 15C |       |       |      | CurveFitFailed              |
| vanRC4      | 15C |       |       |      | LowEfficiency, CtIsSmall, C |
| vanRD       | 15C |       |       |      | CurveFitFailed              |
| vanSA       | 15C |       |       |      | LowEfficiency, CtIsSmall, S |
| vanSB       | 15C | 27.98 | 75.01 | 2.09 |                             |
| vanSC-01    | 15C | 30.82 | 83.97 | 2.15 | MultipleMeltPeaks           |
| vanSC-02    | 15C |       |       |      | NoAmplification             |
| vanTC-01    | 15C |       |       |      | LowEfficiency, CtIsSmall, C |
| vanTC-02    | 15C | 31.8  | 86.42 | 1.87 | MultipleMeltPeaks           |
| vanTE       | 15C | 35.59 | 77.61 | 1.78 | MultipleMeltPeaks           |
| vanTG       | 15C |       |       |      | NoAmplification             |
| vanWB       | 15C |       |       |      | LowEfficiency, CtIsSmall, C |
| vanWG       | 15C |       |       |      | LowEfficiency, CtIsSmall, S |
| vanXA       | 15C |       |       |      | CurveFitFailed              |
| vanXB       | 15C |       |       |      | CurveFitFailed              |
| vanXD       | 15C | 29.53 | 75.51 | 2.04 |                             |

|              |     |       |       |      |                             |
|--------------|-----|-------|-------|------|-----------------------------|
| vanYB        | 15C | 32.08 | 85.15 | 1.99 |                             |
| vanYD-01     | 15C | 31.11 | 82.24 | 1.81 | MultipleMeltPeaks           |
| vanYD-02     | 15C |       |       |      | BadR2, LowEfficiency, CtIsS |
| vatB-01      | 15C |       |       |      | CurveFitFailed              |
| vatB-02      | 15C | 37.16 | 77.87 | 1.83 | MultipleMeltPeaks           |
| vatC-01      | 15C |       |       |      | CurveFitFailed              |
| vatC-02      | 15C | 35.76 | 83.3  | 1.9  | MultipleMeltPeaks           |
| vatE-01      | 15C | 28.1  | 77.36 | 2.09 |                             |
| vatE-02      | 15C |       |       |      | BadR2, LowEfficiency, CtIsS |
| vgaA-01      | 15C | 35.98 | 83.49 | 1.88 |                             |
| vgaA-02      | 15C |       |       |      | CurveFitFailed              |
| vgb-01       | 15C | 31.67 | 85.14 | 1.95 | MultipleMeltPeaks           |
| vgbB-01      | 15C | 33.98 | 89.56 | 1.77 |                             |
| vgbB-02      | 15C |       |       |      | LowEfficiency, CtIsSmall, S |
| yceE/mdtG-0  | 15C | 35.39 | 87.51 | 1.86 |                             |
| yceE/mdtG-0  | 15C |       |       |      | LowEfficiency, CtIsSmall, C |
| yceL/mdtH-0  | 15C | 23.17 | 76.81 | 2.03 |                             |
| yceL/mdtH-0  | 15C |       |       |      | LowEfficiency, CtIsSmall, S |
| yceL/mdtH-0  | 15C | 31.93 | 88.92 | 1.95 |                             |
| yidY/mdtL-01 | 15C | 30.17 | 86.84 | 1.97 | MultipleMeltPeaks           |
| yidY/mdtL-02 | 15C | 34.26 | 80.33 | 1.87 | MultipleMeltPeaks           |































| Assay          | Sample | Ct | Tm    | Efficiency | flag                  |
|----------------|--------|----|-------|------------|-----------------------|
| 16S rRNA       | 16A    |    | 18.41 | 81.91      | 1.91                  |
| aac            | 16A    |    |       |            | NoAmplification       |
| aac(6')-Ib(akz | 16A    |    |       |            | NoAmplification       |
| aac(6')-Ib(akz | 16A    |    |       |            | NoAmplification       |
| aac(6')-II     | 16A    |    | 38.41 | 84.08      | 1.77                  |
| aac(6')I1      | 16A    |    |       |            | NoAmplification       |
| aacA/aphD      | 16A    |    |       |            | NoAmplification       |
| aacC           | 16A    |    | 32.19 | 89.76      | 1.86                  |
| aacC1          | 16A    |    |       |            | CurveFitFailed        |
| aacC2          | 16A    |    |       |            | NoAmplification       |
| aacC4          | 16A    |    |       |            | NoAmplification       |
| aadA-01        | 16A    |    |       |            | NoAmplification       |
| aadA-02        | 16A    |    |       |            | NoAmplification       |
| aadA-1-01      | 16A    |    |       |            | NoAmplification       |
| aadA-1-02      | 16A    |    |       |            | NoAmplification       |
| aadA1          | 16A    |    |       |            | NoAmplification       |
| aadA2-01       | 16A    |    |       |            | NoAmplification       |
| aadA2-02       | 16A    |    |       |            | NoAmplification       |
| aadA2-03       | 16A    |    |       |            | NoAmplification       |
| aadA5-01       | 16A    |    |       |            | NoAmplification       |
| aadA5-02       | 16A    |    | 32.7  | 77.99      | 1.9 MultipleMeltPeaks |
| aadA9-01       | 16A    |    |       |            | NoAmplification       |
| aadA9-02       | 16A    |    |       |            | NoAmplification       |
| aadD           | 16A    |    |       |            | NoAmplification       |
| aadE           | 16A    |    |       |            | NoAmplification       |
| acrA-01        | 16A    |    | 33.42 | 82.31      | 1.93                  |
| acrA-02        | 16A    |    |       |            | NoAmplification       |
| acrA-03        | 16A    |    |       |            | NoAmplification       |
| acrA-04        | 16A    |    | 32.5  | 84.9       | 1.93                  |
| acrA-05        | 16A    |    | 33.34 | 88.59      | 1.88                  |
| acrB-01        | 16A    |    | 36.13 | 80.44      | 1.86                  |
| acrF           | 16A    |    | 29.75 | 82.38      | 1.87                  |
| acrR-01        | 16A    |    |       |            | NoAmplification       |
| acrR-02        | 16A    |    |       |            | NoAmplification       |
| Actin          | 16A    |    | 28.37 | 86.9       | 1.92                  |
| adeA           | 16A    |    |       |            | NoAmplification       |
| ampC-01        | 16A    |    | 37.97 | 79.62      | 1.85                  |
| ampC-02        | 16A    |    |       |            | NoAmplification       |
| ampC-04        | 16A    |    |       |            | NoAmplification       |
| ampC-05        | 16A    |    |       |            | NoAmplification       |
| ampC-06        | 16A    |    |       |            | NoAmplification       |
| ampC-07        | 16A    |    |       |            | NoAmplification       |
| ampC-09        | 16A    |    |       |            | NoAmplification       |
| ampC/blaDH     | 16A    |    |       |            | NoAmplification       |

|                          |     |       |       |      |                   |
|--------------------------|-----|-------|-------|------|-------------------|
| aph                      | 16A |       |       |      | NoAmplification   |
| aph(2')-Id-01            | 16A |       |       |      | NoAmplification   |
| aph(2')-Id-02            | 16A |       |       |      | NoAmplification   |
| aph6ia                   | 16A |       |       |      | NoAmplification   |
| aphA1(aka k <sub>z</sub> | 16A |       |       |      | NoAmplification   |
| bacA-01                  | 16A |       |       |      | NoAmplification   |
| bacA-02                  | 16A |       |       |      | NoAmplification   |
| BETA-globin              | 16A | 29.04 | 83.91 | 1.98 |                   |
| bla-ACC-1                | 16A |       |       |      | NoAmplification   |
| bla-L1                   | 16A | 37.83 | 80.81 | 1.78 | MultipleMeltPeaks |
| bla1                     | 16A |       |       |      | NoAmplification   |
| blaCMY                   | 16A |       |       |      | NoAmplification   |
| blaCMY2-01               | 16A | 38.57 | 83.1  | 1.92 |                   |
| blaCMY2-02               | 16A |       |       |      | NoAmplification   |
| blaCTX-M-01              | 16A | 35.57 | 86.28 | 1.97 |                   |
| blaCTX-M-02              | 16A | 34.93 | 83.72 | 1.75 | MultipleMeltPeaks |
| blaCTX-M-03              | 16A |       |       |      | NoAmplification   |
| blaCTX-M-04              | 16A | 31.55 | 90.84 | 1.82 |                   |
| blaCTX-M-05              | 16A | 32.5  | 76.22 | 1.79 |                   |
| blaCTX-M-06              | 16A |       |       |      | NoAmplification   |
| blaGES                   | 16A |       |       |      | NoAmplification   |
| blaIMP-01                | 16A |       |       |      | NoAmplification   |
| blaIMP-02                | 16A |       |       |      | NoAmplification   |
| blaMOX/blaC              | 16A |       |       |      | NoAmplification   |
| blaOCH                   | 16A |       |       |      | NoAmplification   |
| blaOKP                   | 16A |       |       |      | NoAmplification   |
| blaOXA1/blaC             | 16A |       |       |      | NoAmplification   |
| blaOXA10-01              | 16A |       |       |      | NoAmplification   |
| blaOXA10-02              | 16A |       |       |      | NoAmplification   |
| blaOXY                   | 16A | 31.5  | 89.81 | 1.82 |                   |
| blaPAO                   | 16A | 34.34 | 74.28 | 1.97 |                   |
| blaPER                   | 16A |       |       |      | CurveFitFailed    |
| blaPSE                   | 16A |       |       |      | NoAmplification   |
| blaROB                   | 16A |       |       |      | NoAmplification   |
| blaSFO                   | 16A | 36.7  | 88.27 | 1.76 |                   |
| blaSHV-01                | 16A |       |       |      | NoAmplification   |
| blaSHV-02                | 16A |       |       |      | NoAmplification   |
| blaTEM                   | 16A | 23.79 | 79.6  | 2.02 |                   |
| blaTLA                   | 16A |       |       |      | NoAmplification   |
| blaVEB                   | 16A |       |       |      | NoAmplification   |
| blaVIM                   | 16A |       |       |      | NoAmplification   |
| blaZ                     | 16A |       |       |      | NoAmplification   |
| carB                     | 16A |       |       |      | NoAmplification   |
| catA1                    | 16A |       |       |      | NoAmplification   |
| catB3                    | 16A |       |       |      | NoAmplification   |
| catB8                    | 16A |       |       |      | NoAmplification   |

|            |     |       |       |      |                              |
|------------|-----|-------|-------|------|------------------------------|
| ceoA       | 16A |       |       |      | NoAmplification              |
| cepA       | 16A |       |       |      | NoAmplification              |
| cfiA       | 16A |       |       |      | NoAmplification              |
| cfr        | 16A |       |       |      | NoAmplification              |
| cfxA       | 16A | 25.48 | 77.2  | 2.02 |                              |
| cmeA       | 16A |       |       |      | NoAmplification              |
| cmlA1-01   | 16A |       |       |      | NoAmplification              |
| cmlA1-02   | 16A |       |       |      | NoAmplification              |
| cmr        | 16A |       |       |      | NoAmplification              |
| cmx(A)     | 16A |       |       |      | NoAmplification              |
| cphA-01    | 16A | 28.99 | 86.29 | 1.89 |                              |
| cphA-02    | 16A |       |       |      | CurveFitFailed               |
| dfrA1      | 16A |       |       |      | NoAmplification              |
| dfrA12     | 16A |       |       |      | NoAmplification              |
| emrD       | 16A | 32.52 | 86.34 | 1.82 | MultipleMeltPeaks            |
| ereA       | 16A |       |       |      | NoAmplification              |
| ereB       | 16A |       |       |      | NoAmplification              |
| erm(34)    | 16A | 33.11 | 87.61 | 1.81 |                              |
| erm(35)    | 16A |       |       |      | NoAmplification              |
| erm(36)    | 16A | 38.71 | 61.42 | 1.84 | MultipleMeltPeaks            |
| ermA       | 16A |       |       |      | NoAmplification              |
| ermA/ermTR | 16A |       |       |      | NoAmplification              |
| ermB       | 16A | 22.98 | 74.9  | 2.06 |                              |
| ermC       | 16A |       |       |      | NoAmplification              |
| ermF       | 16A | 28.41 | 74.2  | 1.99 |                              |
| ermJ/ermD  | 16A |       |       |      | NoAmplification              |
| ermK-01    | 16A |       |       |      | NoAmplification              |
| ermK-02    | 16A |       |       |      | NoAmplification              |
| ermT-01    | 16A |       |       |      | NoAmplification              |
| ermT-02    | 16A |       |       |      | CurveFitFailed               |
| ermX       | 16A |       |       |      | NoAmplification              |
| ermY       | 16A |       |       |      | NoAmplification              |
| fabK       | 16A | 25.67 | 79.18 | 2.13 |                              |
| floR       | 16A |       |       |      | NoAmplification              |
| folA       | 16A |       |       |      | NoAmplification              |
| fosB       | 16A |       |       |      | LowEfficiency, CtIsSmall, S: |
| fosX       | 16A |       |       |      | NoAmplification              |
| fox5       | 16A | 32.15 | 89.05 | 1.82 | MultipleMeltPeaks            |
| imiR       | 16A |       |       |      | LowEfficiency, CurveFitFail  |
| ImrA-01    | 16A |       |       |      | NoAmplification              |
| intl       | 16A |       |       |      | NoAmplification              |
| intl1      | 16A | 24.42 | 89.86 | 2    | MultipleMeltPeaks            |
| IS613      | 16A | 25.5  | 79.46 | 2.02 |                              |
| lnuA-01    | 16A |       |       |      | NoAmplification              |
| lnuB-01    | 16A |       |       |      | NoAmplification              |
| lnuB-02    | 16A |       |       |      | NoAmplification              |

|               |     |       |       |      |                   |
|---------------|-----|-------|-------|------|-------------------|
| lnuC          | 16A | 41.73 | 61.99 | 1.49 | MultipleMeltPeaks |
| marR-01       | 16A |       |       |      | NoAmplification   |
| matA/mel      | 16A | 23.22 | 77.55 | 2    |                   |
| mdet1         | 16A |       |       |      | NoAmplification   |
| mdtA          | 16A |       |       |      | NoAmplification   |
| mdtE/yhiU     | 16A | 28.69 | 80.64 | 1.99 |                   |
| mecA          | 16A |       |       |      | NoAmplification   |
| mefA          | 16A | 22.54 | 80.69 | 1.93 | MultipleMeltPeaks |
| mepA          | 16A | 39.58 | 87.43 | 1.6  |                   |
| mexA          | 16A |       |       |      | NoAmplification   |
| mexD          | 16A |       |       |      | NoAmplification   |
| mexE          | 16A | 27.88 | 82.63 | 1.97 |                   |
| mexF          | 16A | 29.4  | 89.7  | 2    |                   |
| mphA-01       | 16A | 29.88 | 91.53 | 1.83 |                   |
| mphA-02       | 16A | 33.37 | 77.02 | 1.94 |                   |
| mphB          | 16A |       |       |      | NoAmplification   |
| mphC          | 16A |       |       |      | NoAmplification   |
| msrA-01       | 16A |       |       |      | NoAmplification   |
| msrC-01       | 16A |       |       |      | NoAmplification   |
| mtrC-01       | 16A | 40.21 | 88.36 | 1.65 | MultipleMeltPeaks |
| mtrC-02       | 16A |       |       |      | NoAmplification   |
| mtrD-02       | 16A | 33.29 | 80.82 | 1.98 |                   |
| mtrD-03       | 16A | 29.88 | 87.94 | 1.85 |                   |
| NDM1          | 16A |       |       |      | NoAmplification   |
| nimE          | 16A |       |       |      | NoAmplification   |
| nisB          | 16A |       |       |      | NoAmplification   |
| oleC          | 16A |       |       |      | CurveFitFailed    |
| oprD          | 16A | 29.29 | 90.61 | 1.97 |                   |
| oprJ          | 16A | 30.68 | 89.95 | 1.84 |                   |
| pbp           | 16A |       |       |      | NoAmplification   |
| pbp2x         | 16A |       |       |      | NoAmplification   |
| Pbp5          | 16A |       |       |      | NoAmplification   |
| penA          | 16A | 33.38 | 91.56 | 1.82 |                   |
| pikR1         | 16A |       |       |      | NoAmplification   |
| pikR2         | 16A |       |       |      | NoAmplification   |
| pmrA          | 16A | 23.27 | 79.03 | 2.05 |                   |
| pncA          | 16A | 32.41 | 90.7  | 1.95 |                   |
| putative mult | 16A |       |       |      | NoAmplification   |
| qac           | 16A |       |       |      | NoAmplification   |
| qacA          | 16A | 34.17 | 70.21 | 1.98 |                   |
| qacA/qacB     | 16A |       |       |      | NoAmplification   |
| qacEdelta1-0  | 16A |       |       |      | NoAmplification   |
| qacEdelta1-0  | 16A | 21.53 | 77.12 | 1.99 |                   |
| qacH-01       | 16A | 39.64 | 85.66 | 1.72 | MultipleMeltPeaks |
| qacH-02       | 16A |       |       |      | NoAmplification   |
| qnrA          | 16A |       |       |      | NoAmplification   |



|              |     |       |       |      |                   |
|--------------|-----|-------|-------|------|-------------------|
| rarD-02      | 16A |       |       |      | NoAmplification   |
| sat4         | 16A |       |       |      | NoAmplification   |
| sdeB         | 16A |       |       |      | NoAmplification   |
| spcN-01      | 16A |       |       |      | NoAmplification   |
| speA         | 16A |       |       |      | NoAmplification   |
| str          | 16A |       |       |      | NoAmplification   |
| strA         | 16A |       |       |      | NoAmplification   |
| strB         | 16A | 37.05 | 76.74 | 1.9  |                   |
| sul1         | 16A |       |       |      | NoAmplification   |
| sul2         | 16A |       |       |      | CurveFitFailed    |
| sulA/foIP-01 | 16A | 21.56 | 81.62 | 1.98 |                   |
| sulA/foIP-03 | 16A | 22.18 | 82.99 | 1.98 |                   |
| tet(32)      | 16A | 28.52 | 80.91 | 1.95 |                   |
| tet(34)      | 16A | 29.91 | 75.79 | 1.96 |                   |
| tet(35)      | 16A |       |       |      | NoAmplification   |
| tet(36)-A    | 16A |       |       |      | NoAmplification   |
| tet(36)-B    | 16A |       |       |      | NoAmplification   |
| tet(37)      | 16A |       |       |      | NoAmplification   |
| tetA-01      | 16A |       |       |      | NoAmplification   |
| tetA-02      | 16A |       |       |      | NoAmplification   |
| tetB-01      | 16A | 26.17 | 79.73 | 1.98 |                   |
| tetB-02      | 16A | 26.01 | 79.5  | 1.95 |                   |
| tetC-01      | 16A | 26.86 | 75.2  | 2.01 |                   |
| tetC-02      | 16A | 24.99 | 75.95 | 1.98 |                   |
| tetD-01      | 16A |       |       |      | NoAmplification   |
| tetD-02      | 16A | 33.7  | 77.15 | 2.05 |                   |
| tetE         | 16A |       |       |      | NoAmplification   |
| tetG-01      | 16A | 34.43 | 86.06 | 1.87 | MultipleMeltPeaks |
| tetG-02      | 16A | 36.17 | 88.39 | 1.77 | MultipleMeltPeaks |
| tetH         | 16A |       |       |      | NoAmplification   |
| tetJ         | 16A |       |       |      | NoAmplification   |
| tetK         | 16A |       |       |      | NoAmplification   |
| tetL-01      | 16A |       |       |      | NoAmplification   |
| tetL-02      | 16A |       |       |      | NoAmplification   |
| tetM-01      | 16A | 20.61 | 76.29 | 1.96 |                   |
| tetM-02      | 16A | 21.03 | 77.29 | 1.96 |                   |
| tetO-01      | 16A | 26.93 | 76.52 | 2.01 |                   |
| tetPA        | 16A | 38.84 | 71.08 | 1.78 |                   |
| tetPB-01     | 16A |       |       |      | NoAmplification   |
| tetPB-02     | 16A | 32.54 | 84.49 | 2    |                   |
| tetPB-03     | 16A |       |       |      | NoAmplification   |
| tetPB-05     | 16A |       |       |      | NoAmplification   |
| tetQ         | 16A | 26.05 | 75.95 | 1.97 |                   |
| tetR-02      | 16A | 34.23 | 80.4  | 1.85 | MultipleMeltPeaks |
| tetR-03      | 16A | 25.1  | 76.05 | 1.96 |                   |
| tetS         | 16A |       |       |      | NoAmplification   |

|             |     |       |       |      |                             |
|-------------|-----|-------|-------|------|-----------------------------|
| tetT        | 16A |       |       |      | NoAmplification             |
| tetU-01     | 16A |       |       |      | NoAmplification             |
| tetV        | 16A |       |       |      | NoAmplification             |
| tetW-01     | 16A | 26.18 | 81.4  | 1.97 |                             |
| tetX        | 16A |       |       |      | NoAmplification             |
| tnpA-01     | 16A | 27.47 | 85.87 | 1.88 |                             |
| tnpA-02     | 16A | 37.8  | 80.05 | 1.78 |                             |
| tnpA-03     | 16A | 29.12 | 76.77 | 2.02 |                             |
| tnpA-04     | 16A |       |       |      | NoAmplification             |
| tnpA-05     | 16A |       |       |      | CurveFitFailed              |
| tnpA-07     | 16A |       |       |      | NoAmplification             |
| tolC-01     | 16A |       |       |      | NoAmplification             |
| tolC-02     | 16A |       |       |      | NoAmplification             |
| tolC-03     | 16A |       |       |      | NoAmplification             |
| Tp614       | 16A |       |       |      | NoAmplification             |
| ttgA        | 16A |       |       |      | NoAmplification             |
| ttgB        | 16A |       |       |      | NoAmplification             |
| vanA        | 16A |       |       |      | NoAmplification             |
| vanB-01     | 16A | 32.05 | 86.3  | 1.91 |                             |
| vanC-01     | 16A | 35.27 | 73.06 | 2.02 |                             |
| vanC-02     | 16A |       |       |      | NoAmplification             |
| vanC-03     | 16A | 26.71 | 85.51 | 1.84 |                             |
| vanC1       | 16A |       |       |      | NoAmplification             |
| vanC2/vanC3 | 16A |       |       |      | NoAmplification             |
| vanG        | 16A |       |       |      | NoAmplification             |
| vanHB       | 16A |       |       |      | NoAmplification             |
| vanHD       | 16A |       |       |      | NoAmplification             |
| vanRA-01    | 16A |       |       |      | NoAmplification             |
| vanRA-02    | 16A |       |       |      | NoAmplification             |
| vanRB       | 16A |       |       |      | NoAmplification             |
| vanRC       | 16A |       |       |      | NoAmplification             |
| vanRC4      | 16A |       |       |      | NoAmplification             |
| vanRD       | 16A |       |       |      | NoAmplification             |
| vanSA       | 16A |       |       |      | NoAmplification             |
| vanSB       | 16A |       |       |      | NoAmplification             |
| vanSC-01    | 16A |       |       |      | NoAmplification             |
| vanSC-02    | 16A |       |       |      | NoAmplification             |
| vanTC-01    | 16A |       |       |      | NoAmplification             |
| vanTC-02    | 16A |       |       |      | NoAmplification             |
| vanTE       | 16A |       |       |      | NoAmplification             |
| vanTG       | 16A |       |       |      | NoAmplification             |
| vanWB       | 16A |       |       |      | NoAmplification             |
| vanWG       | 16A | 39.5  | 73.84 | 1.83 |                             |
| vanXA       | 16A |       |       |      | LowEfficiency, CurveFitFail |
| vanXB       | 16A |       |       |      | NoAmplification             |
| vanXD       | 16A | 31.33 | 75.06 | 2.01 |                             |

|              |     |       |       |      |                   |
|--------------|-----|-------|-------|------|-------------------|
| vanYB        | 16A |       |       |      | NoAmplification   |
| vanYD-01     | 16A | 36.8  | 81.44 | 1.75 |                   |
| vanYD-02     | 16A |       |       |      | NoAmplification   |
| vatB-01      | 16A |       |       |      | NoAmplification   |
| vatB-02      | 16A |       |       |      | NoAmplification   |
| vatC-01      | 16A |       |       |      | NoAmplification   |
| vatC-02      | 16A |       |       |      | NoAmplification   |
| vatE-01      | 16A | 28.48 | 76.22 | 2.13 |                   |
| vatE-02      | 16A | 38.28 | 74.82 | 1.88 |                   |
| vgaA-01      | 16A |       |       |      | NoAmplification   |
| vgaA-02      | 16A |       |       |      | NoAmplification   |
| vgb-01       | 16A |       |       |      | CurveFitFailed    |
| vgbB-01      | 16A |       |       |      | NoAmplification   |
| vgbB-02      | 16A |       |       |      | NoAmplification   |
| yceE/mdtG-0  | 16A |       |       |      | NoAmplification   |
| yceE/mdtG-0  | 16A |       |       |      | NoAmplification   |
| yceL/mdtH-0  | 16A | 31.64 | 79.18 | 1.68 | MultipleMeltPeaks |
| yceL/mdtH-0  | 16A |       |       |      | NoAmplification   |
| yceL/mdtH-0  | 16A | 32.45 | 86.41 | 1.83 |                   |
| yidY/mdtL-01 | 16A | 31.06 | 78.14 | 1.98 |                   |
| yidY/mdtL-02 | 16A | 38.74 | 76.22 | 1.82 |                   |































| Assay          | Sample | Ct | Tm    | Efficiency | flag                   |
|----------------|--------|----|-------|------------|------------------------|
| 16S rRNA       | 16B    |    | 19.47 | 81.89      | 1.95                   |
| aac            | 16B    |    | 34.91 | 80.74      | 1.95 MultipleMeltPeaks |
| aac(6')-Ib(akz | 16B    |    |       |            | NoAmplification        |
| aac(6')-Ib(akz | 16B    |    | 35.19 | 77.45      | 1.9 MultipleMeltPeaks  |
| aac(6')-Ib(akz | 16B    |    | 34.64 | 78.92      | 1.95                   |
| aac(6')-II     | 16B    |    |       |            | CurveFitFailed         |
| aac(6')I1      | 16B    |    | 36.62 | 71.1       | 1.86                   |
| aacA/aphD      | 16B    |    |       |            | NoAmplification        |
| aacC           | 16B    |    | 29.81 | 84.07      | 1.93 MultipleMeltPeaks |
| aacC1          | 16B    |    |       |            | NoAmplification        |
| aacC2          | 16B    |    |       |            | NoAmplification        |
| aacC4          | 16B    |    | 33.08 | 90.19      | 1.85                   |
| aadA-01        | 16B    |    |       |            | NoAmplification        |
| aadA-02        | 16B    |    | 37.61 | 80.7       | 1.85                   |
| aadA-1-01      | 16B    |    |       |            | NoAmplification        |
| aadA-1-02      | 16B    |    |       |            | NoAmplification        |
| aadA1          | 16B    |    | 35.87 | 83.22      | 1.87                   |
| aadA2-01       | 16B    |    | 38.92 | 91.44      | 1.68 MultipleMeltPeaks |
| aadA2-02       | 16B    |    | 36.14 | 74.74      | 1.64                   |
| aadA2-03       | 16B    |    |       |            | NoAmplification        |
| aadA5-01       | 16B    |    |       |            | CurveFitFailed         |
| aadA5-02       | 16B    |    | 35.64 | 78.37      | 1.87                   |
| aadA9-01       | 16B    |    |       |            | CurveFitFailed         |
| aadA9-02       | 16B    |    |       |            | NoAmplification        |
| aadD           | 16B    |    |       |            | NoAmplification        |
| aadE           | 16B    |    |       |            | NoAmplification        |
| acrA-01        | 16B    |    | 32.25 | 88.65      | 1.88                   |
| acrA-02        | 16B    |    |       |            | NoAmplification        |
| acrA-03        | 16B    |    | 36.96 | 61.37      | 2.27 MultipleMeltPeaks |
| acrA-04        | 16B    |    | 33.35 | 80.38      | 1.97                   |
| acrA-05        | 16B    |    | 32.75 | 80.12      | 1.94                   |
| acrB-01        | 16B    |    |       |            | NoAmplification        |
| acrF           | 16B    |    | 29.54 | 82.87      | 1.77                   |
| acrR-01        | 16B    |    | 33.24 | 81.19      | 1.93                   |
| acrR-02        | 16B    |    | 39.58 | 86.52      | 1.76 MultipleMeltPeaks |
| Actin          | 16B    |    | 24.84 | 86.9       | 1.92                   |
| adeA           | 16B    |    |       |            | NoAmplification        |
| ampC-01        | 16B    |    | 34.17 | 81.48      | 1.95                   |
| ampC-02        | 16B    |    |       |            | NoAmplification        |
| ampC-04        | 16B    |    | 32.5  | 86.41      | 1.9                    |
| ampC-05        | 16B    |    |       |            | NoAmplification        |
| ampC-06        | 16B    |    |       |            | NoAmplification        |
| ampC-07        | 16B    |    |       |            | CurveFitFailed         |
| ampC-09        | 16B    |    |       |            | NoAmplification        |
| ampC/blaDH     | 16B    |    | 36.58 | 77.02      | 1.88                   |

|                          |     |       |       |      |                   |
|--------------------------|-----|-------|-------|------|-------------------|
| aph                      | 16B |       |       |      | NoAmplification   |
| aph(2')-Id-01            | 16B |       |       |      | NoAmplification   |
| aph(2')-Id-02            | 16B |       |       |      | NoAmplification   |
| aph6ia                   | 16B |       |       |      | NoAmplification   |
| aphA1(aka k <sub>z</sub> | 16B |       |       |      | NoAmplification   |
| bacA-01                  | 16B |       |       |      | NoAmplification   |
| bacA-02                  | 16B | 33.66 | 81.15 | 1.85 |                   |
| BETA-globin              | 16B | 25.39 | 84    | 1.96 |                   |
| bla-ACC-1                | 16B | 38.46 | 80.49 | 1.84 | MultipleMeltPeaks |
| bla-L1                   | 16B | 32.7  | 85.85 | 1.92 |                   |
| bla1                     | 16B |       |       |      | NoAmplification   |
| blaCMY                   | 16B |       |       |      | NoAmplification   |
| blaCMY2-01               | 16B |       |       |      | NoAmplification   |
| blaCMY2-02               | 16B | 34.35 | 81.88 | 1.99 |                   |
| blaCTX-M-01              | 16B |       |       |      | NoAmplification   |
| blaCTX-M-02              | 16B | 39.11 | 79.68 | 1.7  |                   |
| blaCTX-M-03              | 16B |       |       |      | NoAmplification   |
| blaCTX-M-04              | 16B |       |       |      | CurveFitFailed    |
| blaCTX-M-05              | 16B | 34.62 | 76.11 | 1.69 |                   |
| blaCTX-M-06              | 16B |       |       |      | NoAmplification   |
| blaGES                   | 16B |       |       |      | NoAmplification   |
| blaIMP-01                | 16B |       |       |      | NoAmplification   |
| blaIMP-02                | 16B |       |       |      | CurveFitFailed    |
| blaMOX/blaC              | 16B |       |       |      | NoAmplification   |
| blaOCH                   | 16B |       |       |      | NoAmplification   |
| blaOKP                   | 16B |       |       |      | NoAmplification   |
| blaOXA1/blaC             | 16B |       |       |      | NoAmplification   |
| blaOXA10-01              | 16B |       |       |      | NoAmplification   |
| blaOXA10-02              | 16B |       |       |      | NoAmplification   |
| blaOXY                   | 16B |       |       |      | CurveFitFailed    |
| blaPAO                   | 16B |       |       |      | NoAmplification   |
| blaPER                   | 16B |       |       |      | CurveFitFailed    |
| blaPSE                   | 16B |       |       |      | NoAmplification   |
| blaROB                   | 16B |       |       |      | NoAmplification   |
| blaSFO                   | 16B | 34.68 | 80.42 | 1.9  |                   |
| blaSHV-01                | 16B | 38.06 | 86.47 | 1.67 | MultipleMeltPeaks |
| blaSHV-02                | 16B |       |       |      | NoAmplification   |
| blaTEM                   | 16B | 29.6  | 79.12 | 2.06 |                   |
| blaTLA                   | 16B |       |       |      | NoAmplification   |
| blaVEB                   | 16B |       |       |      | NoAmplification   |
| blaVIM                   | 16B |       |       |      | NoAmplification   |
| blaZ                     | 16B |       |       |      | NoAmplification   |
| carB                     | 16B |       |       |      | NoAmplification   |
| catA1                    | 16B |       |       |      | NoAmplification   |
| catB3                    | 16B |       |       |      | NoAmplification   |
| catB8                    | 16B | 31.64 | 81.46 | 1.93 | MultipleMeltPeaks |

|            |     |       |       |      |                              |
|------------|-----|-------|-------|------|------------------------------|
| ceoA       | 16B | 33.52 | 82.37 | 1.91 |                              |
| cepA       | 16B |       |       |      | NoAmplification              |
| cfiA       | 16B | 36.3  | 87.19 | 1.81 |                              |
| cfr        | 16B |       |       |      | NoAmplification              |
| cfxA       | 16B | 25.21 | 77.32 | 2.03 |                              |
| cmeA       | 16B |       |       |      | CurveFitFailed               |
| cmlA1-01   | 16B |       |       |      | NoAmplification              |
| cmlA1-02   | 16B |       |       |      | NoAmplification              |
| cmr        | 16B |       |       |      | CurveFitFailed               |
| cmx(A)     | 16B | 30.22 | 84.35 | 1.95 |                              |
| cphA-01    | 16B | 33.97 | 84.39 | 1.92 | MultipleMeltPeaks            |
| cphA-02    | 16B | 38.06 | 79.88 | 1.78 | MultipleMeltPeaks            |
| dfrA1      | 16B |       |       |      | NoAmplification              |
| dfrA12     | 16B | 34.61 | 85.7  | 1.71 |                              |
| emrD       | 16B |       |       |      | NoAmplification              |
| ereA       | 16B |       |       |      | CurveFitFailed               |
| ereB       | 16B | 33.62 | 77.31 | 2.01 | MultipleMeltPeaks            |
| erm(34)    | 16B | 35.43 | 87.75 | 1.76 |                              |
| erm(35)    | 16B |       |       |      | NoAmplification              |
| erm(36)    | 16B | 35.64 | 85.9  | 1.88 | MultipleMeltPeaks            |
| ermA       | 16B |       |       |      | NoAmplification              |
| ermA/ermTR | 16B |       |       |      | NoAmplification              |
| ermB       | 16B | 26.06 | 75.11 | 2.08 |                              |
| ermC       | 16B |       |       |      | NoAmplification              |
| ermF       | 16B |       |       |      | NoAmplification              |
| ermJ/ermD  | 16B |       |       |      | NoAmplification              |
| ermK-01    | 16B | 42.64 | 73.69 | 1.96 | MultipleMeltPeaks            |
| ermK-02    | 16B | 38.3  | 75.54 | 1.82 |                              |
| ermT-01    | 16B |       |       |      | NoAmplification              |
| ermT-02    | 16B |       |       |      | NoAmplification              |
| ermX       | 16B | 38.95 | 83.67 | 1.68 | MultipleMeltPeaks            |
| ermY       | 16B |       |       |      | NoAmplification              |
| fabK       | 16B | 26.39 | 79.67 | 2.11 |                              |
| floR       | 16B |       |       |      | NoAmplification              |
| folA       | 16B |       |       |      | NoAmplification              |
| fosB       | 16B |       |       |      | LowEfficiency, CtIsSmall, S: |
| fosX       | 16B |       |       |      | NoAmplification              |
| fox5       | 16B | 28.63 | 86.27 | 1.93 |                              |
| imiR       | 16B |       |       |      | LowEfficiency, CurveFitFail  |
| ImrA-01    | 16B | 39.23 | 79.45 | 1.81 |                              |
| intl       | 16B | 31.08 | 84.32 | 1.93 | MultipleMeltPeaks            |
| intl1      | 16B | 22.34 | 86.81 | 2.05 |                              |
| IS613      | 16B | 28.01 | 79.55 | 2.06 |                              |
| lnuA-01    | 16B |       |       |      | LowEfficiency, CtIsSmall, Ci |
| lnuB-01    | 16B |       |       |      | NoAmplification              |
| lnuB-02    | 16B |       |       |      | NoAmplification              |

|                |     |       |       |      |                   |
|----------------|-----|-------|-------|------|-------------------|
| lnuC           | 16B | 39.11 | 83.65 | 1.62 |                   |
| marR-01        | 16B | 31.78 | 85.07 | 1.92 |                   |
| matA/mel       | 16B | 23.3  | 77.69 | 2.05 |                   |
| mdet1          | 16B |       |       |      | NoAmplification   |
| mdtA           | 16B | 39.69 | 82.32 | 1.7  |                   |
| mdtE/yhiU      | 16B |       |       |      | NoAmplification   |
| mecA           | 16B |       |       |      | NoAmplification   |
| mefA           | 16B | 22.73 | 80.52 | 1.95 |                   |
| mepA           | 16B | 35.49 | 78.29 | 1.88 | MultipleMeltPeaks |
| mexA           | 16B |       |       |      | NoAmplification   |
| mexD           | 16B |       |       |      | NoAmplification   |
| mexE           | 16B |       |       |      | NoAmplification   |
| mexF           | 16B | 28.98 | 84.93 | 1.96 |                   |
| mphA-01        | 16B | 29.35 | 88.87 | 1.95 |                   |
| mphA-02        | 16B | 30.58 | 86.7  | 2.13 |                   |
| mphB           | 16B | 39    | 72.36 | 1.58 |                   |
| mphC           | 16B |       |       |      | NoAmplification   |
| msrA-01        | 16B |       |       |      | NoAmplification   |
| msrC-01        | 16B |       |       |      | NoAmplification   |
| mtrC-01        | 16B |       |       |      | NoAmplification   |
| mtrC-02        | 16B | 35.23 | 82.55 | 1.83 |                   |
| mtrD-02        | 16B | 28.34 | 84.34 | 2.03 | MultipleMeltPeaks |
| mtrD-03        | 16B | 35.58 | 80.3  | 1.8  | MultipleMeltPeaks |
| NDM1           | 16B |       |       |      | NoAmplification   |
| nimE           | 16B |       |       |      | NoAmplification   |
| nisB           | 16B | 37.18 | 74.9  | 1.86 |                   |
| oleC           | 16B |       |       |      | NoAmplification   |
| oprD           | 16B | 32.37 | 82.58 | 1.96 | MultipleMeltPeaks |
| oprJ           | 16B |       |       |      | CurveFitFailed    |
| pbp            | 16B |       |       |      | NoAmplification   |
| pbp2x          | 16B |       |       |      | NoAmplification   |
| Pbp5           | 16B |       |       |      | NoAmplification   |
| penA           | 16B |       |       |      | NoAmplification   |
| pikR1          | 16B |       |       |      | NoAmplification   |
| pikR2          | 16B | 37.44 | 84.62 | 1.79 |                   |
| pmrA           | 16B | 23.87 | 79.35 | 2.07 |                   |
| pncA           | 16B | 37.3  | 67.46 | 2.74 | MultipleMeltPeaks |
| putative multi | 16B | 34.5  | 83.88 | 1.93 | MultipleMeltPeaks |
| qac            | 16B |       |       |      | NoAmplification   |
| qacA           | 16B | 34.09 | 70.35 | 1.83 |                   |
| qacA/qacB      | 16B | 41.78 | 61.39 | 1.44 | MultipleMeltPeaks |
| qacEdelta1-0   | 16B |       |       |      | NoAmplification   |
| qacEdelta1-0   | 16B | 26.35 | 76.86 | 1.98 |                   |
| qacH-01        | 16B | 32.95 | 85.43 | 1.97 |                   |
| qacH-02        | 16B | 38.05 | 83.54 | 1.68 | MultipleMeltPeaks |
| qnrA           | 16B |       |       |      | CurveFitFailed    |

|              |     |       |       |      |                            |
|--------------|-----|-------|-------|------|----------------------------|
| rarD-02      | 16B |       |       |      | NoAmplification            |
| sat4         | 16B |       |       |      | NoAmplification            |
| sdeB         | 16B | 38.75 | 72.37 | 1.89 |                            |
| spcN-01      | 16B |       |       |      | NoAmplification            |
| speA         | 16B |       |       |      | NoAmplification            |
| str          | 16B |       |       |      | NoAmplification            |
| strA         | 16B |       |       |      | NoAmplification            |
| strB         | 16B | 38.34 | 81.41 | 1.79 | MultipleMeltPeaks          |
| sul1         | 16B | 37.78 | 88.29 | 1.55 |                            |
| sul2         | 16B |       |       |      | NoAmplification            |
| sulA/foIP-01 | 16B | 22.23 | 81.68 | 2.01 |                            |
| sulA/foIP-03 | 16B | 22.91 | 83.49 | 1.97 |                            |
| tet(32)      | 16B | 27.39 | 81.17 | 1.97 |                            |
| tet(34)      | 16B | 30.29 | 75.98 | 2.01 |                            |
| tet(35)      | 16B |       |       |      | NoAmplification            |
| tet(36)-A    | 16B |       |       |      | NoAmplification            |
| tet(36)-B    | 16B |       |       |      | NoAmplification            |
| tet(37)      | 16B |       |       |      | CurveFitFailed             |
| tetA-01      | 16B | 35.29 | 85.07 | 1.83 |                            |
| tetA-02      | 16B | 38.39 | 61.98 | 1.88 | MultipleMeltPeaks          |
| tetB-01      | 16B | 25.36 | 85.95 | 1.98 |                            |
| tetB-02      | 16B | 25.81 | 79.61 | 1.99 |                            |
| tetC-01      | 16B | 25.81 | 75.33 | 2.01 |                            |
| tetC-02      | 16B | 24.58 | 76.13 | 2.03 |                            |
| tetD-01      | 16B |       |       |      | NoAmplification            |
| tetD-02      | 16B | 39.5  | 76.01 | 1.79 |                            |
| tetE         | 16B |       |       |      | NoAmplification            |
| tetG-01      | 16B | 36.99 | 82.46 | 1.83 | MultipleMeltPeaks          |
| tetG-02      | 16B | 32.4  | 82.26 | 1.94 |                            |
| tetH         | 16B |       |       |      | NoAmplification            |
| tetJ         | 16B |       |       |      | NoAmplification            |
| tetK         | 16B |       |       |      | NoAmplification            |
| tetL-01      | 16B |       |       |      | NoAmplification            |
| tetL-02      | 16B | 35.69 | 85.43 | 1.75 |                            |
| tetM-01      | 16B | 22.28 | 76.35 | 2    |                            |
| tetM-02      | 16B | 22.4  | 77.47 | 2.01 |                            |
| tetO-01      | 16B | 26.26 | 76.71 | 2.04 |                            |
| tetPA        | 16B |       |       |      | NoAmplification            |
| tetPB-01     | 16B |       |       |      | NoAmplification            |
| tetPB-02     | 16B | 32.14 | 84.64 | 2.07 |                            |
| tetPB-03     | 16B |       |       |      | NoAmplification            |
| tetPB-05     | 16B |       |       |      | NoAmplification            |
| tetQ         | 16B | 26.71 | 76.22 | 2    |                            |
| tetR-02      | 16B | 32.8  | 81.88 | 1.91 | MultipleMeltPeaks          |
| tetR-03      | 16B | 25.65 | 76.31 | 1.98 |                            |
| tetS         | 16B |       |       |      | BadR2, LowEfficiency, Ctl5 |

|             |     |       |       |      |                   |
|-------------|-----|-------|-------|------|-------------------|
| tetT        | 16B |       |       |      | NoAmplification   |
| tetU-01     | 16B |       |       |      | NoAmplification   |
| tetV        | 16B |       |       |      | NoAmplification   |
| tetW-01     | 16B | 26.8  | 81.46 | 2.01 |                   |
| tetX        | 16B |       |       |      | NoAmplification   |
| tnpA-01     | 16B |       |       |      | NoAmplification   |
| tnpA-02     | 16B | 36.25 | 88.56 | 1.82 |                   |
| tnpA-03     | 16B | 36.7  | 77.49 | 1.84 |                   |
| tnpA-04     | 16B |       |       |      | NoAmplification   |
| tnpA-05     | 16B |       |       |      | NoAmplification   |
| tnpA-07     | 16B |       |       |      | NoAmplification   |
| tolC-01     | 16B |       |       |      | NoAmplification   |
| tolC-02     | 16B | 32.58 | 83.58 | 1.95 |                   |
| tolC-03     | 16B | 34.93 | 81.02 | 1.88 | MultipleMeltPeaks |
| Tp614       | 16B | 40.97 | 73.86 | 1.73 |                   |
| ttgA        | 16B | 41.03 | 85.57 | 1.67 | MultipleMeltPeaks |
| ttgB        | 16B | 37.89 | 84.31 | 2    | MultipleMeltPeaks |
| vanA        | 16B |       |       |      | NoAmplification   |
| vanB-01     | 16B | 36.82 | 79.62 | 1.81 | MultipleMeltPeaks |
| vanC-01     | 16B |       |       |      | NoAmplification   |
| vanC-02     | 16B |       |       |      | NoAmplification   |
| vanC-03     | 16B | 28.51 | 85.25 | 1.88 |                   |
| vanC1       | 16B |       |       |      | NoAmplification   |
| vanC2/vanC3 | 16B | 36.8  | 84.34 | 1.86 | MultipleMeltPeaks |
| vanG        | 16B |       |       |      | NoAmplification   |
| vanHB       | 16B | 32.33 | 87.2  | 1.92 |                   |
| vanHD       | 16B |       |       |      | NoAmplification   |
| vanRA-01    | 16B | 38.37 | 77.88 | 1.96 | MultipleMeltPeaks |
| vanRA-02    | 16B |       |       |      | NoAmplification   |
| vanRB       | 16B | 36.38 | 87.52 | 1.8  |                   |
| vanRC       | 16B |       |       |      | NoAmplification   |
| vanRC4      | 16B |       |       |      | NoAmplification   |
| vanRD       | 16B |       |       |      | NoAmplification   |
| vanSA       | 16B |       |       |      | NoAmplification   |
| vanSB       | 16B |       |       |      | CurveFitFailed    |
| vanSC-01    | 16B |       |       |      | NoAmplification   |
| vanSC-02    | 16B |       |       |      | NoAmplification   |
| vanTC-01    | 16B |       |       |      | NoAmplification   |
| vanTC-02    | 16B |       |       |      | NoAmplification   |
| vanTE       | 16B |       |       |      | NoAmplification   |
| vanTG       | 16B |       |       |      | NoAmplification   |
| vanWB       | 16B |       |       |      | NoAmplification   |
| vanWG       | 16B | 34.75 | 74.46 | 1.96 |                   |
| vanXA       | 16B |       |       |      | NoAmplification   |
| vanXB       | 16B |       |       |      | NoAmplification   |
| vanXD       | 16B | 31.73 | 74.55 | 2.09 |                   |

|              |     |       |       |      |                   |
|--------------|-----|-------|-------|------|-------------------|
| vanYB        | 16B | 35.98 | 73.74 | 1.92 |                   |
| vanYD-01     | 16B | 35.69 | 80.92 | 1.8  |                   |
| vanYD-02     | 16B | 38.06 | 74.8  | 1.85 |                   |
| vatB-01      | 16B | 38.88 | 74.87 | 1.8  |                   |
| vatB-02      | 16B |       |       |      | NoAmplification   |
| vatC-01      | 16B |       |       |      | NoAmplification   |
| vatC-02      | 16B | 37.84 | 83.21 | 1.81 |                   |
| vatE-01      | 16B | 29.25 | 77.47 | 2.1  |                   |
| vatE-02      | 16B |       |       |      | NoAmplification   |
| vgaA-01      | 16B |       |       |      | NoAmplification   |
| vgaA-02      | 16B | 39.03 | 71.96 | 1.79 | MultipleMeltPeaks |
| vgb-01       | 16B |       |       |      | NoAmplification   |
| vgbB-01      | 16B |       |       |      | NoAmplification   |
| vgbB-02      | 16B |       |       |      | NoAmplification   |
| yceE/mdtG-0  | 16B |       |       |      | CurveFitFailed    |
| yceE/mdtG-0  | 16B |       |       |      | NoAmplification   |
| yceL/mdtH-0  | 16B | 33.36 | 85.62 | 1.91 |                   |
| yceL/mdtH-0  | 16B |       |       |      | NoAmplification   |
| yceL/mdtH-0  | 16B | 33.7  | 86.24 | 1.92 |                   |
| yidY/mdtL-01 | 16B | 35.2  | 84.26 | 1.86 |                   |
| yidY/mdtL-02 | 16B |       |       |      | NoAmplification   |































| Assay          | Sample | Ct | Tm    | Efficiency | flag                         |
|----------------|--------|----|-------|------------|------------------------------|
| 16S rRNA       | 16C    |    | 14.34 | 82.28      | 1.91                         |
| aac            | 16C    |    | 33.79 | 81.03      | 1.99                         |
| aac(6')-Ib(akz | 16C    |    |       |            | CurveFitFailed               |
| aac(6')-Ib(akz | 16C    |    | 31.27 | 86.22      | 1.91                         |
| aac(6')-Ib(akz | 16C    |    | 34.17 | 78.83      | 1.96                         |
| aac(6')-II     | 16C    |    |       |            | CurveFitFailed               |
| aac(6')I1      | 16C    |    | 34.83 | 87.82      | 1.86                         |
| aacA/aphD      | 16C    |    |       |            | LowEfficiency, CtIsSmall, S: |
| aacC           | 16C    |    | 29.64 | 90.2       | 1.88                         |
| aacC1          | 16C    |    | 36.9  | 83.94      | 1.86                         |
| aacC2          | 16C    |    | 37.77 | 78.1       | 1.83 MultipleMeltPeaks       |
| aacC4          | 16C    |    | 34.78 | 89.95      | 1.88                         |
| aadA-01        | 16C    |    |       |            | CurveFitFailed               |
| aadA-02        | 16C    |    |       |            | CurveFitFailed               |
| aadA-1-01      | 16C    |    | 35.12 | 81.3       | 1.9                          |
| aadA-1-02      | 16C    |    |       |            | CurveFitFailed               |
| aadA1          | 16C    |    | 34.61 | 83.97      | 1.95                         |
| aadA2-01       | 16C    |    |       |            | LowEfficiency, CtIsSmall, S: |
| aadA2-02       | 16C    |    | 32.93 | 75.25      | 1.97                         |
| aadA2-03       | 16C    |    |       |            | LowEfficiency, CtIsSmall, S: |
| aadA5-01       | 16C    |    |       |            | LowEfficiency, CtIsSmall, S: |
| aadA5-02       | 16C    |    | 29.93 | 78.38      | 2.01 MultipleMeltPeaks       |
| aadA9-01       | 16C    |    | 30.64 | 91.66      | 1.92                         |
| aadA9-02       | 16C    |    |       |            | CurveFitFailed               |
| aadD           | 16C    |    |       |            | CurveFitFailed               |
| aadE           | 16C    |    |       |            | LowEfficiency, CtIsSmall, S: |
| acrA-01        | 16C    |    | 32.83 | 88.78      | 1.98                         |
| acrA-02        | 16C    |    | 37.88 | 84.18      | 1.84 MultipleMeltPeaks       |
| acrA-03        | 16C    |    | 34.51 | 80.8       | 1.85                         |
| acrA-04        | 16C    |    | 31.98 | 80.4       | 1.99                         |
| acrA-05        | 16C    |    | 32.67 | 87.29      | 1.95                         |
| acrB-01        | 16C    |    | 32.88 | 80.73      | 2.02                         |
| acrF           | 16C    |    | 31.22 | 83.16      | 1.78                         |
| acrR-01        | 16C    |    | 30.2  | 79.42      | 1.89                         |
| acrR-02        | 16C    |    |       |            | CurveFitFailed               |
| Actin          | 16C    |    | 21.47 | 87.05      | 1.92                         |
| adeA           | 16C    |    | 33.83 | 83.52      | 1.86                         |
| ampC-01        | 16C    |    | 33.44 | 80.41      | 1.94                         |
| ampC-02        | 16C    |    |       |            | LowEfficiency, CtIsSmall, C: |
| ampC-04        | 16C    |    | 33.08 | 86.63      | 1.56 MultipleMeltPeaks       |
| ampC-05        | 16C    |    |       |            | LowEfficiency, CtIsSmall, C: |
| ampC-06        | 16C    |    | 30.16 | 83.98      | 1.99                         |
| ampC-07        | 16C    |    |       |            | CurveFitFailed               |
| ampC-09        | 16C    |    |       |            | CurveFitFailed               |
| ampC/blaDH     | 16C    |    | 33.02 | 85.21      | 2.01 MultipleMeltPeaks       |

|                            |     |       |       |      |                                          |
|----------------------------|-----|-------|-------|------|------------------------------------------|
| aph                        | 16C |       |       |      | LowEfficiency, CtIsSmall, S <sub>e</sub> |
| aph(2')-Id-01              | 16C |       |       |      | LowEfficiency, CtIsSmall, S <sub>e</sub> |
| aph(2')-Id-02              | 16C |       |       |      | CurveFitFailed                           |
| aph6ia                     | 16C |       |       |      | LowEfficiency, CtIsSmall, S <sub>e</sub> |
| aphA1(aka k <sub>a</sub> ) | 16C |       |       |      | CurveFitFailed                           |
| bacA-01                    | 16C |       |       |      | CurveFitFailed                           |
| bacA-02                    | 16C |       |       |      | CurveFitFailed                           |
| BETA-globin                | 16C | 22.08 | 84.15 | 1.99 |                                          |
| bla-ACC-1                  | 16C | 39.5  | 85.94 | 1.8  | MultipleMeltPeaks                        |
| bla-L1                     | 16C | 35.37 | 86.26 | 1.9  | MultipleMeltPeaks                        |
| bla1                       | 16C |       |       |      | LowEfficiency, CtIsSmall, S <sub>e</sub> |
| blaCMY                     | 16C | 38.38 | 80.37 | 1.87 |                                          |
| blaCMY2-01                 | 16C |       |       |      | CurveFitFailed                           |
| blaCMY2-02                 | 16C | 31.31 | 81.96 | 1.88 | MultipleMeltPeaks                        |
| blaCTX-M-01                | 16C | 36.16 | 76.38 | 1.6  | MultipleMeltPeaks                        |
| blaCTX-M-02                | 16C | 33.11 | 84.05 | 1.81 | MultipleMeltPeaks                        |
| blaCTX-M-03                | 16C |       |       |      | CurveFitFailed                           |
| blaCTX-M-04                | 16C | 34.22 | 86.61 | 1.99 | MultipleMeltPeaks                        |
| blaCTX-M-05                | 16C | 35.4  | 76.05 | 1.78 |                                          |
| blaCTX-M-06                | 16C |       |       |      | NoAmplification                          |
| blaGES                     | 16C |       |       |      | LowEfficiency, CtIsSmall, C <sub>i</sub> |
| blaIMP-01                  | 16C |       |       |      | NoAmplification                          |
| blaIMP-02                  | 16C |       |       |      | LowEfficiency, CtIsSmall, S <sub>e</sub> |
| blaMOX/blaC                | 16C |       |       |      | NoAmplification                          |
| blaOCH                     | 16C |       |       |      | NoAmplification                          |
| blaOKP                     | 16C |       |       |      | NoAmplification                          |
| blaOXA1/blaC               | 16C |       |       |      | LowEfficiency, CtIsSmall, S <sub>e</sub> |
| blaOXA10-01                | 16C |       |       |      | CurveFitFailed                           |
| blaOXA10-02                | 16C |       |       |      | LowEfficiency, CtIsSmall, S <sub>e</sub> |
| blaOXY                     | 16C |       |       |      | LowEfficiency, CtIsSmall, S <sub>e</sub> |
| blaPAO                     | 16C |       |       |      | NoAmplification                          |
| blaPER                     | 16C |       |       |      | LowEfficiency, CtIsSmall, S <sub>e</sub> |
| blaPSE                     | 16C |       |       |      | NoAmplification                          |
| blaROB                     | 16C |       |       |      | NoAmplification                          |
| blaSFO                     | 16C | 33.25 | 80.91 | 1.84 | MultipleMeltPeaks                        |
| blaSHV-01                  | 16C |       |       |      | CurveFitFailed                           |
| blaSHV-02                  | 16C |       |       |      | LowEfficiency, CtIsSmall, C <sub>i</sub> |
| blaTEM                     | 16C | 24.68 | 79.28 | 2.01 |                                          |
| blaTLA                     | 16C |       |       |      | LowEfficiency, CtIsSmall, S <sub>e</sub> |
| blaVEB                     | 16C |       |       |      | NoAmplification                          |
| blaVIM                     | 16C | 37.91 | 88.98 | 1.92 | MultipleMeltPeaks                        |
| blaZ                       | 16C | 28.01 | 74.59 | 2.05 |                                          |
| carB                       | 16C | 33.35 | 82.33 | 1.9  |                                          |
| catA1                      | 16C |       |       |      | NoAmplification                          |
| catB3                      | 16C |       |       |      | CurveFitFailed                           |
| catB8                      | 16C | 32.56 | 81.3  | 1.98 |                                          |

|            |     |       |       |      |                                            |
|------------|-----|-------|-------|------|--------------------------------------------|
| ceoA       | 16C | 31.92 | 82.35 | 1.97 |                                            |
| cepA       | 16C |       |       |      | LowEfficiency, CtIsSmall, CtIsSmall        |
| cfiA       | 16C | 34.68 | 86.64 | 1.87 |                                            |
| cfr        | 16C |       |       |      | LowEfficiency, CtIsSmall, CtIsSmall        |
| cfxA       | 16C | 21.36 | 77.53 | 2    |                                            |
| cmeA       | 16C |       |       |      | CurveFitFailed                             |
| cmlA1-01   | 16C |       |       |      | LowEfficiency, CtIsSmall, CtIsSmall        |
| cmlA1-02   | 16C |       |       |      | NoAmplification                            |
| cmr        | 16C |       |       |      | CurveFitFailed                             |
| cmx(A)     | 16C | 30    | 82.64 | 2.02 |                                            |
| cphA-01    | 16C | 38.04 | 81.16 | 1.81 | MultipleMeltPeaks                          |
| cphA-02    | 16C | 36.51 | 82.34 | 1.84 |                                            |
| dfrA1      | 16C | 32.76 | 79.6  | 2    |                                            |
| dfrA12     | 16C | 34.08 | 85.74 | 1.7  | MultipleMeltPeaks                          |
| emrD       | 16C | 36.62 | 84.27 | 1.79 |                                            |
| ereA       | 16C |       |       |      | CurveFitFailed                             |
| ereB       | 16C | 33.53 | 87.94 | 1.98 | MultipleMeltPeaks                          |
| erm(34)    | 16C | 33.92 | 87.99 | 1.82 |                                            |
| erm(35)    | 16C |       |       |      | CurveFitFailed                             |
| erm(36)    | 16C | 42.68 | 83.02 | 1.64 | MultipleMeltPeaks                          |
| ermA       | 16C |       |       |      | LowEfficiency, CtIsSmall, CtIsSmall        |
| ermA/ermTR | 16C | 29.12 | 75.8  | 2.02 |                                            |
| ermB       | 16C | 21.6  | 75.16 | 2.12 |                                            |
| ermC       | 16C |       |       |      | LowEfficiency, CtIsSmall, CtIsSmall        |
| ermF       | 16C |       |       |      | LowEfficiency, CtIsSmall, CtIsSmall        |
| ermJ/ermD  | 16C |       |       |      | LowEfficiency, CtIsSmall, CtIsSmall        |
| ermK-01    | 16C | 37.46 | 73.38 | 1.92 |                                            |
| ermK-02    | 16C |       |       |      | BadR2, LowEfficiency, CtIsSmall, CtIsSmall |
| ermT-01    | 16C |       |       |      | LowEfficiency, CtIsSmall, CtIsSmall        |
| ermT-02    | 16C |       |       |      | CurveFitFailed                             |
| ermX       | 16C | 29.63 | 83.62 | 1.86 |                                            |
| ermY       | 16C |       |       |      | CurveFitFailed                             |
| fabK       | 16C | 23.99 | 79.71 | 2    |                                            |
| floR       | 16C |       |       |      | NoAmplification                            |
| folA       | 16C |       |       |      | NoAmplification                            |
| fosB       | 16C |       |       |      | LowEfficiency, CtIsSmall, CtIsSmall        |
| fosX       | 16C |       |       |      | CurveFitFailed                             |
| fox5       | 16C | 27.12 | 88.23 | 1.97 |                                            |
| imiR       | 16C |       |       |      | NoAmplification                            |
| ImrA-01    | 16C | 39.7  | 82.66 | 1.8  |                                            |
| intl       | 16C | 31.03 | 84.8  | 1.98 |                                            |
| intl1      | 16C | 21.68 | 87.16 | 2.04 |                                            |
| IS613      | 16C | 31.82 | 79.35 | 1.93 |                                            |
| lnuA-01    | 16C | 29.97 | 73.32 | 2.04 |                                            |
| lnuB-01    | 16C |       |       |      | LowEfficiency, CtIsSmall, CtIsSmall        |
| lnuB-02    | 16C |       |       |      | CurveFitFailed                             |

|                |     |       |       |      |                              |
|----------------|-----|-------|-------|------|------------------------------|
| lnuC           | 16C | 32.51 | 88.87 | 1.84 |                              |
| marR-01        | 16C | 36.64 | 85.52 | 1.81 |                              |
| matA/mel       | 16C | 19    | 77.86 | 2.04 |                              |
| mdetI1         | 16C |       |       |      | LowEfficiency, CtIsSmall, Ci |
| mdtA           | 16C | 37.07 | 82.25 | 1.66 |                              |
| mdtE/yhiU      | 16C | 33.33 | 87.6  | 1.89 |                              |
| mecA           | 16C |       |       |      | LowEfficiency, CtIsSmall, S; |
| mefA           | 16C | 18.25 | 80.66 | 1.98 | MultipleMeltPeaks            |
| mepA           | 16C | 32.7  | 90.12 | 1.96 | MultipleMeltPeaks            |
| mexA           | 16C | 38.36 | 89.53 | 1.84 | MultipleMeltPeaks            |
| mexD           | 16C |       |       |      | NoAmplification              |
| mexE           | 16C | 36.79 | 87.97 | 1.83 |                              |
| mexF           | 16C | 28.73 | 84.95 | 1.82 | MultipleMeltPeaks            |
| mphA-01        | 16C | 28.82 | 91.09 | 1.91 | MultipleMeltPeaks            |
| mphA-02        | 16C | 30.33 | 87.18 | 1.72 |                              |
| mphB           | 16C |       |       |      | CurveFitFailed               |
| mphC           | 16C |       |       |      | LowEfficiency, CtIsSmall, S; |
| msrA-01        | 16C | 29.84 | 76.5  | 2.05 |                              |
| msrC-01        | 16C |       |       |      | NoAmplification              |
| mtrC-01        | 16C |       |       |      | NoAmplification              |
| mtrC-02        | 16C |       |       |      | LowEfficiency, CtIsSmall, Ci |
| mtrD-02        | 16C | 27.49 | 82.14 | 1.99 |                              |
| mtrD-03        | 16C | 26.16 | 79.95 | 1.78 |                              |
| NDM1           | 16C |       |       |      | CurveFitFailed               |
| nimE           | 16C |       |       |      | CurveFitFailed               |
| nisB           | 16C |       |       |      | CurveFitFailed               |
| oleC           | 16C |       |       |      | CurveFitFailed               |
| oprD           | 16C | 30.4  | 87.11 | 1.99 |                              |
| oprJ           | 16C | 34.36 | 77.36 | 1.84 | MultipleMeltPeaks            |
| pbp            | 16C |       |       |      | LowEfficiency, CtIsSmall, S; |
| pbp2x          | 16C |       |       |      | LowEfficiency, CtIsSmall, S; |
| Pbp5           | 16C |       |       |      | LowEfficiency, CtIsSmall, S; |
| penA           | 16C | 36.03 | 85.14 | 1.71 | MultipleMeltPeaks            |
| pikR1          | 16C |       |       |      | CurveFitFailed               |
| pikR2          | 16C | 32.59 | 91.55 | 1.97 | MultipleMeltPeaks            |
| pmrA           | 16C | 21.37 | 79.44 | 2.08 |                              |
| pncA           | 16C | 26.86 | 89.9  | 1.95 |                              |
| putative multi | 16C | 37.39 | 76.93 | 1.81 | MultipleMeltPeaks            |
| qac            | 16C |       |       |      | CurveFitFailed               |
| qacA           | 16C | 28.64 | 80.89 | 2.02 |                              |
| qacA/qacB      | 16C |       |       |      | LowEfficiency, CtIsSmall, S; |
| qacEdelta1-0   | 16C |       |       |      | LowEfficiency, CtIsSmall, S; |
| qacEdelta1-0   | 16C | 37.73 | 87.98 | 1.66 | MultipleMeltPeaks            |
| qacH-01        | 16C | 37.64 | 81.73 | 1.81 |                              |
| qacH-02        | 16C |       |       |      | CurveFitFailed               |
| qnrA           | 16C | 32.1  | 81.06 | 2    |                              |



|              |     |       |       |      |                                          |
|--------------|-----|-------|-------|------|------------------------------------------|
| rarD-02      | 16C |       |       |      | NoAmplification                          |
| sat4         | 16C |       |       |      | LowEfficiency, CtIsSmall, S <sub>e</sub> |
| sdeB         | 16C |       |       |      | LowEfficiency, CtIsSmall, S <sub>e</sub> |
| spcN-01      | 16C |       |       |      | LowEfficiency, CtIsSmall, S <sub>e</sub> |
| speA         | 16C |       |       |      | NoAmplification                          |
| str          | 16C |       |       |      | LowEfficiency, CtIsSmall, S <sub>e</sub> |
| strA         | 16C |       |       |      | LowEfficiency, CtIsSmall, S <sub>e</sub> |
| strB         | 16C |       |       |      | CurveFitFailed                           |
| sul1         | 16C | 36.83 | 88.39 | 1.64 |                                          |
| sul2         | 16C | 29.61 | 85.82 | 2.01 |                                          |
| sulA/foIP-01 | 16C | 19.7  | 81.83 | 2.04 |                                          |
| sulA/foIP-03 | 16C | 20.17 | 83.45 | 2.01 |                                          |
| tet(32)      | 16C | 23.11 | 81.49 | 1.98 |                                          |
| tet(34)      | 16C | 29.27 | 76.09 | 1.98 |                                          |
| tet(35)      | 16C |       |       |      | NoAmplification                          |
| tet(36)-A    | 16C |       |       |      | LowEfficiency, CtIsSmall, C <sub>i</sub> |
| tet(36)-B    | 16C |       |       |      | LowEfficiency, CtIsSmall, S <sub>e</sub> |
| tet(37)      | 16C | 35.77 | 84.25 | 1.89 |                                          |
| tetA-01      | 16C | 31.12 | 85.25 | 2    |                                          |
| tetA-02      | 16C | 33.89 | 92.34 | 1.9  | MultipleMeltPeaks                        |
| tetB-01      | 16C | 26.74 | 79.74 | 1.92 |                                          |
| tetB-02      | 16C | 25.79 | 79.66 | 2.02 |                                          |
| tetC-01      | 16C | 26.18 | 75.29 | 1.99 |                                          |
| tetC-02      | 16C | 26.05 | 76.11 | 2.04 |                                          |
| tetD-01      | 16C |       |       |      | LowEfficiency, CtIsSmall, S <sub>e</sub> |
| tetD-02      | 16C |       |       |      | CurveFitFailed                           |
| tetE         | 16C |       |       |      | CurveFitFailed                           |
| tetG-01      | 16C | 37.55 | 82.47 | 1.77 | MultipleMeltPeaks                        |
| tetG-02      | 16C |       |       |      | CurveFitFailed                           |
| tetH         | 16C |       |       |      | CurveFitFailed                           |
| tetJ         | 16C |       |       |      | CurveFitFailed                           |
| tetK         | 16C |       |       |      | LowEfficiency, CtIsSmall, S <sub>e</sub> |
| tetL-01      | 16C |       |       |      | LowEfficiency, CtIsSmall, S <sub>e</sub> |
| tetL-02      | 16C |       |       |      | CurveFitFailed                           |
| tetM-01      | 16C | 17.66 | 76.3  | 2.01 |                                          |
| tetM-02      | 16C | 17.87 | 77.53 | 2.09 |                                          |
| tetO-01      | 16C |       |       |      | LowEfficiency, CtIsSmall, S <sub>e</sub> |
| tetPA        | 16C |       |       |      | LowEfficiency, CtIsSmall, S <sub>e</sub> |
| tetPB-01     | 16C | 38.65 | 90.4  | 1.72 |                                          |
| tetPB-02     | 16C | 31.14 | 84.69 | 1.83 |                                          |
| tetPB-03     | 16C |       |       |      | CurveFitFailed                           |
| tetPB-05     | 16C |       |       |      | LowEfficiency, CtIsSmall, S <sub>e</sub> |
| tetQ         | 16C | 23.17 | 76.45 | 2.05 |                                          |
| tetR-02      | 16C | 28.86 | 85.18 | 1.91 |                                          |
| tetR-03      | 16C | 25.52 | 76.23 | 1.98 |                                          |
| tetS         | 16C |       |       |      | LowEfficiency, CtIsSmall, S <sub>e</sub> |

|             |     |       |       |      |                                          |
|-------------|-----|-------|-------|------|------------------------------------------|
| tetT        | 16C |       |       |      | LowEfficiency, CtIsSmall, Ci             |
| tetU-01     | 16C |       |       |      | LowEfficiency, CtIsSmall, Ci             |
| tetV        | 16C |       |       |      | LowEfficiency, CtIsSmall, S <sub>e</sub> |
| tetW-01     | 16C | 24.72 | 81.9  | 1.99 |                                          |
| tetX        | 16C |       |       |      | LowEfficiency, CtIsSmall, S <sub>e</sub> |
| tnpA-01     | 16C |       |       |      | LowEfficiency, CtIsSmall, S <sub>e</sub> |
| tnpA-02     | 16C | 32.77 | 89.28 | 1.81 |                                          |
| tnpA-03     | 16C | 29.23 | 77.85 | 2.12 |                                          |
| tnpA-04     | 16C | 29.32 | 82.29 | 1.92 |                                          |
| tnpA-05     | 16C | 29.38 | 80.76 | 1.91 |                                          |
| tnpA-07     | 16C |       |       |      | LowEfficiency, CtIsSmall, S <sub>e</sub> |
| tolC-01     | 16C | 36.86 | 85.58 | 1.81 | MultipleMeltPeaks                        |
| tolC-02     | 16C | 31.27 | 87.72 | 1.96 |                                          |
| tolC-03     | 16C | 32.41 | 78.87 | 1.88 | MultipleMeltPeaks                        |
| Tp614       | 16C |       |       |      | CurveFitFailed                           |
| ttgA        | 16C |       |       |      | NoAmplification                          |
| ttgB        | 16C | 34.12 | 80.58 | 2.04 |                                          |
| vanA        | 16C |       |       |      | NoAmplification                          |
| vanB-01     | 16C | 31.9  | 90.87 | 1.71 |                                          |
| vanC-01     | 16C |       |       |      | LowEfficiency, CtIsSmall, S <sub>e</sub> |
| vanC-02     | 16C |       |       |      | LowEfficiency, CtIsSmall, S <sub>e</sub> |
| vanC-03     | 16C | 24.16 | 85.74 | 1.92 | MultipleMeltPeaks                        |
| vanC1       | 16C |       |       |      | LowEfficiency, CtIsSmall, S <sub>e</sub> |
| vanC2/vanC3 | 16C | 33.71 | 85.05 | 2.01 |                                          |
| vanG        | 16C |       |       |      | LowEfficiency, CtIsSmall, Ci             |
| vanHB       | 16C | 31.38 | 91.27 | 1.96 | MultipleMeltPeaks                        |
| vanHD       | 16C |       |       |      | LowEfficiency, CtIsSmall, Ci             |
| vanRA-01    | 16C |       |       |      | LowEfficiency, CtIsSmall, S <sub>e</sub> |
| vanRA-02    | 16C |       |       |      | LowEfficiency, CtIsSmall, S <sub>e</sub> |
| vanRB       | 16C | 30.23 | 75.61 | 2.12 |                                          |
| vanRC       | 16C |       |       |      | LowEfficiency, CtIsSmall, S <sub>e</sub> |
| vanRC4      | 16C |       |       |      | LowEfficiency, CtIsSmall, S <sub>e</sub> |
| vanRD       | 16C |       |       |      | NoAmplification                          |
| vanSA       | 16C |       |       |      | CurveFitFailed                           |
| vanSB       | 16C |       |       |      | CurveFitFailed                           |
| vanSC-01    | 16C |       |       |      | CurveFitFailed                           |
| vanSC-02    | 16C |       |       |      | LowEfficiency, CtIsSmall, S <sub>e</sub> |
| vanTC-01    | 16C |       |       |      | LowEfficiency, CtIsSmall, S <sub>e</sub> |
| vanTC-02    | 16C |       |       |      | CurveFitFailed                           |
| vanTE       | 16C |       |       |      | CurveFitFailed                           |
| vanTG       | 16C |       |       |      | LowEfficiency, CtIsSmall, S <sub>e</sub> |
| vanWB       | 16C |       |       |      | LowEfficiency, CtIsSmall, S <sub>e</sub> |
| vanWG       | 16C |       |       |      | CurveFitFailed                           |
| vanXA       | 16C |       |       |      | LowEfficiency, CtIsSmall, S <sub>e</sub> |
| vanXB       | 16C |       |       |      | CurveFitFailed                           |
| vanXD       | 16C | 31.05 | 75    | 2.04 |                                          |

|              |     |       |       |      |                              |
|--------------|-----|-------|-------|------|------------------------------|
| vanYB        | 16C | 34.79 | 74.25 | 1.95 |                              |
| vanYD-01     | 16C | 33.17 | 81.71 | 1.84 |                              |
| vanYD-02     | 16C |       |       |      | LowEfficiency, CtIsSmall, S: |
| vatB-01      | 16C |       |       |      | LowEfficiency, CtIsSmall, C: |
| vatB-02      | 16C |       |       |      | CurveFitFailed               |
| vatC-01      | 16C |       |       |      | CurveFitFailed               |
| vatC-02      | 16C | 36.26 | 76.81 | 1.81 | MultipleMeltPeaks            |
| vatE-01      | 16C | 31.78 | 76.68 | 2.05 |                              |
| vatE-02      | 16C |       |       |      | NoAmplification              |
| vgaA-01      | 16C |       |       |      | LowEfficiency, CtIsSmall, S: |
| vgaA-02      | 16C |       |       |      | LowEfficiency, CtIsSmall, S: |
| vgb-01       | 16C | 37.33 | 75.7  | 1.87 |                              |
| vgbB-01      | 16C |       |       |      | LowEfficiency, CtIsSmall, S: |
| vgbB-02      | 16C |       |       |      | LowEfficiency, CtIsSmall, S: |
| yceE/mdtG-0  | 16C | 37.85 | 77.55 | 1.8  |                              |
| yceE/mdtG-0  | 16C |       |       |      | NoAmplification              |
| yceL/mdtH-0  | 16C | 31.37 | 87.49 | 1.83 | MultipleMeltPeaks            |
| yceL/mdtH-0  | 16C |       |       |      | LowEfficiency, CtIsSmall, S: |
| yceL/mdtH-0  | 16C | 36.95 | 81.19 | 1.85 | MultipleMeltPeaks            |
| yidY/mdtL-01 | 16C | 29.84 | 79.5  | 1.91 |                              |
| yidY/mdtL-02 | 16C | 39.76 | 76.87 | 1.8  |                              |































| Assay          | Sample | Ct | Tm    | Efficiency | flag                         |
|----------------|--------|----|-------|------------|------------------------------|
| 16S rRNA       | 17A    |    | 15.56 | 82.2       | 1.96                         |
| aac            | 17A    |    | 30.57 | 78.46      | 1.77 MultipleMeltPeaks       |
| aac(6')-Ib(akz | 17A    |    |       |            | LowEfficiency, CtIsSmall, Ci |
| aac(6')-Ib(akz | 17A    |    | 29.81 | 81.93      | 2.07 MultipleMeltPeaks       |
| aac(6')-Ib(akz | 17A    |    | 32.06 | 87.25      | 1.95 MultipleMeltPeaks       |
| aac(6')-II     | 17A    |    | 32.51 | 83.92      | 1.91 MultipleMeltPeaks       |
| aac(6')I1      | 17A    |    | 35.28 | 89.92      | 1.85                         |
| aacA/aphD      | 17A    |    |       |            | LowEfficiency, CtIsSmall, Ci |
| aacC           | 17A    |    | 29.96 | 87.36      | 1.79                         |
| aacC1          | 17A    |    |       |            | LowEfficiency, CtIsSmall, Ci |
| aacC2          | 17A    |    |       |            | LowEfficiency, CtIsSmall, Ci |
| aacC4          | 17A    |    | 32.29 | 83.51      | 2.03 MultipleMeltPeaks       |
| aadA-01        | 17A    |    |       |            | CurveFitFailed               |
| aadA-02        | 17A    |    | 35.02 | 86.78      | 1.96 MultipleMeltPeaks       |
| aadA-1-01      | 17A    |    | 31.99 | 81.28      | 1.92                         |
| aadA-1-02      | 17A    |    |       |            | LowEfficiency, CtIsSmall, Ci |
| aadA1          | 17A    |    | 31.07 | 83.98      | 2.26                         |
| aadA2-01       | 17A    |    | 34.75 | 88.9       | 1.94 MultipleMeltPeaks       |
| aadA2-02       | 17A    |    | 30.56 | 75.22      | 1.99                         |
| aadA2-03       | 17A    |    |       |            | CurveFitFailed               |
| aadA5-01       | 17A    |    | 34.4  | 88.61      | 1.89                         |
| aadA5-02       | 17A    |    | 31.05 | 83.27      | 2.01 MultipleMeltPeaks       |
| aadA9-01       | 17A    |    |       |            | CurveFitFailed               |
| aadA9-02       | 17A    |    |       |            | LowEfficiency, CtIsSmall, S: |
| aadD           | 17A    |    |       |            | LowEfficiency, CtIsSmall, Ci |
| aadE           | 17A    |    |       |            | LowEfficiency, CtIsSmall, Ci |
| acrA-01        | 17A    |    | 29.57 | 88.71      | 2.01                         |
| acrA-02        | 17A    |    | 29.73 | 87.71      | 1.97                         |
| acrA-03        | 17A    |    | 31.88 | 87.95      | 1.93 MultipleMeltPeaks       |
| acrA-04        | 17A    |    | 29.53 | 88.03      | 1.88 MultipleMeltPeaks       |
| acrA-05        | 17A    |    | 29.53 | 89.04      | 1.98                         |
| acrB-01        | 17A    |    | 35.55 | 89.09      | 1.86                         |
| acrF           | 17A    |    | 23.77 | 83.05      | 1.82                         |
| acrR-01        | 17A    |    | 33.73 | 81.03      | 1.97                         |
| acrR-02        | 17A    |    | 34.43 | 85.86      | 1.95                         |
| Actin          | 17A    |    | 19.44 | 86.88      | 1.99                         |
| adeA           | 17A    |    |       |            | LowEfficiency, CtIsSmall, Ci |
| ampC-01        | 17A    |    | 32.5  | 85.32      | 1.84 MultipleMeltPeaks       |
| ampC-02        | 17A    |    | 34.81 | 85.89      | 2                            |
| ampC-04        | 17A    |    | 30.93 | 78.77      | 1.73 MultipleMeltPeaks       |
| ampC-05        | 17A    |    |       |            | CurveFitFailed               |
| ampC-06        | 17A    |    |       |            | CurveFitFailed               |
| ampC-07        | 17A    |    | 33.2  | 88.47      | 1.94 MultipleMeltPeaks       |
| ampC-09        | 17A    |    | 33.79 | 87.94      | 1.94                         |
| ampC/blaDH     | 17A    |    | 31.29 | 87.07      | 1.9                          |

|                          |     |       |       |      |                                          |
|--------------------------|-----|-------|-------|------|------------------------------------------|
| aph                      | 17A |       |       |      | LowEfficiency, CtIsSmall, Ci             |
| aph(2')-Id-01            | 17A |       |       |      | LowEfficiency, CtIsSmall, Ci             |
| aph(2')-Id-02            | 17A |       |       |      | LowEfficiency, CtIsSmall, Ci             |
| aph6ia                   | 17A | 29.27 | 78.25 | 2.01 |                                          |
| aphA1(aka k <sub>a</sub> | 17A |       |       |      | LowEfficiency, CtIsSmall, Ci             |
| bacA-01                  | 17A |       |       |      | CurveFitFailed                           |
| bacA-02                  | 17A | 34.53 | 88.22 | 1.76 |                                          |
| BETA-globin              | 17A | 20.39 | 84.05 | 1.98 |                                          |
| bla-ACC-1                | 17A | 30.67 | 88.45 | 1.98 | MultipleMeltPeaks                        |
| bla-L1                   | 17A | 29.5  | 89.07 | 1.95 |                                          |
| bla1                     | 17A |       |       |      | LowEfficiency, CtIsSmall, Ci             |
| blaCMY                   | 17A |       |       |      | CurveFitFailed                           |
| blaCMY2-01               | 17A |       |       |      | CurveFitFailed                           |
| blaCMY2-02               | 17A | 29.08 | 82.12 | 1.98 | MultipleMeltPeaks                        |
| blaCTX-M-01              | 17A |       |       |      | CurveFitFailed                           |
| blaCTX-M-02              | 17A | 32.06 | 90.06 | 2.03 |                                          |
| blaCTX-M-03              | 17A |       |       |      | LowEfficiency, CtIsSmall, Ci             |
| blaCTX-M-04              | 17A | 32.48 | 88.37 | 1.69 | MultipleMeltPeaks                        |
| blaCTX-M-05              | 17A | 34.08 | 89.08 | 1.63 | MultipleMeltPeaks                        |
| blaCTX-M-06              | 17A | 35.2  | 88.22 | 1.87 |                                          |
| blaGES                   | 17A |       |       |      | LowEfficiency, CtIsSmall, Ci             |
| blaIMP-01                | 17A |       |       |      | LowEfficiency, CtIsSmall, Ci             |
| blaIMP-02                | 17A | 34.11 | 82.63 | 1.93 |                                          |
| blaMOX/blaC              | 17A |       |       |      | LowEfficiency, CtIsSmall, S <sub>e</sub> |
| blaOCH                   | 17A |       |       |      | NoAmplification                          |
| blaOKP                   | 17A |       |       |      | NoAmplification                          |
| blaOXA1/blaC             | 17A |       |       |      | LowEfficiency, CtIsSmall, Ci             |
| blaOXA10-01              | 17A |       |       |      | LowEfficiency, CtIsSmall, Ci             |
| blaOXA10-02              | 17A |       |       |      | LowEfficiency, CtIsSmall, Ci             |
| blaOXY                   | 17A | 30.53 | 88.67 | 1.94 | MultipleMeltPeaks                        |
| blaPAO                   | 17A |       |       |      | LowEfficiency, CtIsSmall, Ci             |
| blaPER                   | 17A |       |       |      | CurveFitFailed                           |
| blaPSE                   | 17A |       |       |      | LowEfficiency, CtIsSmall, Ci             |
| blaROB                   | 17A |       |       |      | NoAmplification                          |
| blaSFO                   | 17A | 31.12 | 89.48 | 1.96 |                                          |
| blaSHV-01                | 17A |       |       |      | CurveFitFailed                           |
| blaSHV-02                | 17A |       |       |      | LowEfficiency, CtIsSmall, Ci             |
| blaTEM                   | 17A | 35.14 | 75.56 | 1.72 | MultipleMeltPeaks                        |
| blaTLA                   | 17A |       |       |      | LowEfficiency, CtIsSmall, Ci             |
| blaVEB                   | 17A |       |       |      | LowEfficiency, CtIsSmall, Ci             |
| blaVIM                   | 17A |       |       |      | NoAmplification                          |
| blaZ                     | 17A | 23.2  | 74.95 | 2.1  |                                          |
| carB                     | 17A | 34.05 | 89.94 | 1.86 |                                          |
| catA1                    | 17A |       |       |      | NoAmplification                          |
| catB3                    | 17A | 34.67 | 87.56 | 1.97 |                                          |
| catB8                    | 17A | 29.6  | 82.52 | 2    |                                          |

|            |     |       |       |      |                              |
|------------|-----|-------|-------|------|------------------------------|
| ceoA       | 17A | 30.2  | 82.32 | 1.95 |                              |
| cepA       | 17A |       |       |      | LowEfficiency, CtIsSmall, Ci |
| cfiA       | 17A | 30.65 | 88.23 | 1.94 | MultipleMeltPeaks            |
| cfr        | 17A |       |       |      | LowEfficiency, CtIsSmall, Ci |
| cfxA       | 17A | 21.41 | 77.36 | 1.93 |                              |
| cmeA       | 17A |       |       |      | CurveFitFailed               |
| cmlA1-01   | 17A | 34.29 | 89.39 | 2    | MultipleMeltPeaks            |
| cmlA1-02   | 17A |       |       |      | BadR2, LowEfficiency, CtIsS  |
| cmr        | 17A |       |       |      | BadR2, LowEfficiency, CtIsS  |
| cmx(A)     | 17A | 27.44 | 84.28 | 2.04 | MultipleMeltPeaks            |
| cphA-01    | 17A | 30.01 | 85.21 | 2.03 |                              |
| cphA-02    | 17A | 33.86 | 86.42 | 2    | MultipleMeltPeaks            |
| dfrA1      | 17A | 32.53 | 88.45 | 1.92 |                              |
| dfrA12     | 17A | 35.09 | 85.67 | 1.74 |                              |
| emrD       | 17A | 31.89 | 90.71 | 1.91 |                              |
| ereA       | 17A |       |       |      | LowEfficiency, CtIsSmall, Ci |
| ereB       | 17A | 32.81 | 88.8  | 2.14 |                              |
| erm(34)    | 17A | 34.45 | 91.06 | 1.96 |                              |
| erm(35)    | 17A |       |       |      | LowEfficiency, CtIsSmall, Ci |
| erm(36)    | 17A | 32.79 | 89.41 | 2.47 | MultipleMeltPeaks            |
| ermA       | 17A |       |       |      | LowEfficiency, CtIsSmall, Ci |
| ermA/ermTR | 17A |       |       |      | NoAmplification              |
| ermB       | 17A | 20.07 | 74.91 | 2.22 |                              |
| ermC       | 17A |       |       |      | CurveFitFailed               |
| ermF       | 17A |       |       |      | LowEfficiency, CtIsSmall, Ci |
| ermJ/ermD  | 17A |       |       |      | LowEfficiency, CtIsSmall, Ci |
| ermK-01    | 17A |       |       |      | CurveFitFailed               |
| ermK-02    | 17A | 31.59 | 83.98 | 1.9  |                              |
| ermT-01    | 17A |       |       |      | LowEfficiency, CtIsSmall, Ci |
| ermT-02    | 17A |       |       |      | CurveFitFailed               |
| ermX       | 17A | 27.31 | 83.66 | 1.8  |                              |
| ermY       | 17A |       |       |      | LowEfficiency, CtIsSmall, Ci |
| fabK       | 17A | 26.61 | 79.27 | 1.98 |                              |
| floR       | 17A |       |       |      | NoAmplification              |
| folA       | 17A |       |       |      | NoAmplification              |
| fosB       | 17A |       |       |      | LowEfficiency, CtIsSmall, S; |
| fosX       | 17A |       |       |      | LowEfficiency, CtIsSmall, Ci |
| fox5       | 17A | 26.49 | 86.17 | 1.98 |                              |
| imiR       | 17A |       |       |      | NoAmplification              |
| ImrA-01    | 17A | 34.24 | 82.66 | 1.97 |                              |
| intl       | 17A | 28.45 | 89.07 | 2.02 | MultipleMeltPeaks            |
| intl1      | 17A | 19.05 | 87.37 | 2.2  |                              |
| IS613      | 17A | 21.93 | 79.56 | 1.97 |                              |
| lnuA-01    | 17A |       |       |      | LowEfficiency, CtIsSmall, Ci |
| lnuB-01    | 17A |       |       |      | LowEfficiency, CtIsSmall, Ci |
| lnuB-02    | 17A |       |       |      | CurveFitFailed               |

|                |     |       |       |      |                              |
|----------------|-----|-------|-------|------|------------------------------|
| lnuC           | 17A | 32.44 | 88.06 | 1.83 |                              |
| marR-01        | 17A |       |       |      | BadR2, LowEfficiency, CtIsS  |
| matA/mel       | 17A | 19.34 | 77.65 | 2.17 |                              |
| mdet1          | 17A |       |       |      | LowEfficiency, CtIsSmall, Ci |
| mdtA           | 17A | 33.72 | 81.87 | 1.9  | MultipleMeltPeaks            |
| mdtE/yhiU      | 17A | 32.72 | 89.38 | 2.01 | MultipleMeltPeaks            |
| mecA           | 17A |       |       |      | LowEfficiency, CtIsSmall, Ci |
| mefA           | 17A | 18.68 | 80.55 | 2.04 |                              |
| mepA           | 17A | 31.43 | 88.78 | 1.81 |                              |
| mexA           | 17A |       |       |      | CurveFitFailed               |
| mexD           | 17A |       |       |      | LowEfficiency, CtIsSmall, Ci |
| mexE           | 17A | 34.47 | 86.77 | 1.89 |                              |
| mexF           | 17A | 27.03 | 87.51 | 2.15 |                              |
| mphA-01        | 17A | 29.07 | 89.22 | 2.11 |                              |
| mphA-02        | 17A | 27.2  | 87.46 | 2.11 |                              |
| mphB           | 17A | 33.05 | 83.38 | 2.01 | MultipleMeltPeaks            |
| mphC           | 17A |       |       |      | LowEfficiency, CtIsSmall, Ci |
| msrA-01        | 17A |       |       |      | LowEfficiency, CtIsSmall, Ci |
| msrC-01        | 17A |       |       |      | NoAmplification              |
| mtrC-01        | 17A |       |       |      | LowEfficiency, CtIsSmall, Ci |
| mtrC-02        | 17A | 33.46 | 84.08 | 1.93 |                              |
| mtrD-02        | 17A | 25.78 | 82.38 | 1.93 |                              |
| mtrD-03        | 17A | 30.43 | 82.6  | 1.96 |                              |
| NDM1           | 17A |       |       |      | LowEfficiency, CtIsSmall, Ci |
| nimE           | 17A |       |       |      | CurveFitFailed               |
| nisB           | 17A | 34.17 | 82.77 | 1.85 |                              |
| oleC           | 17A | 32.52 | 87.87 | 1.95 |                              |
| oprD           | 17A | 25.76 | 91.87 | 1.9  |                              |
| oprJ           | 17A | 30.48 | 91.36 | 2.12 |                              |
| pbp            | 17A |       |       |      | CurveFitFailed               |
| pbp2x          | 17A | 21.7  | 75.63 | 1.96 |                              |
| Pbp5           | 17A |       |       |      | LowEfficiency, CtIsSmall, S  |
| penA           | 17A |       |       |      | CurveFitFailed               |
| pikR1          | 17A | 32.35 | 89.41 | 1.97 |                              |
| pikR2          | 17A | 30.56 | 84.68 | 2.18 | MultipleMeltPeaks            |
| pmrA           | 17A | 21.08 | 79.24 | 2.16 |                              |
| pncA           | 17A | 24.78 | 89.67 | 1.92 |                              |
| putative multi | 17A | 34.12 | 83.92 | 2.04 |                              |
| qac            | 17A |       |       |      | BadR2, LowEfficiency, CtIsS  |
| qacA           | 17A |       |       |      | LowEfficiency, CtIsSmall, Ci |
| qacA/qacB      | 17A |       |       |      | LowEfficiency, CtIsSmall, Ci |
| qacEdelta1-0   | 17A |       |       |      | LowEfficiency, CtIsSmall, Ci |
| qacEdelta1-0   | 17A | 32.12 | 88.23 | 1.8  | MultipleMeltPeaks            |
| qacH-01        | 17A | 29.74 | 85.15 | 1.89 | MultipleMeltPeaks            |
| qacH-02        | 17A | 33.08 | 83.72 | 1.85 | MultipleMeltPeaks            |
| qnrA           | 17A | 36.04 | 77.97 | 1.98 | MultipleMeltPeaks            |

|              |     |       |       |      |                              |
|--------------|-----|-------|-------|------|------------------------------|
| rarD-02      | 17A |       |       |      | NoAmplification              |
| sat4         | 17A |       |       |      | CurveFitFailed               |
| sdeB         | 17A |       |       |      | CurveFitFailed               |
| spcN-01      | 17A |       |       |      | LowEfficiency, CtIsSmall, Ci |
| speA         | 17A |       |       |      | NoAmplification              |
| str          | 17A |       |       |      | LowEfficiency, CtIsSmall, Ci |
| strA         | 17A |       |       |      | LowEfficiency, CtIsSmall, Ci |
| strB         | 17A |       |       |      | BadR2, LowEfficiency, CtIsS  |
| sul1         | 17A | 31.23 | 89.73 | 2.03 |                              |
| sul2         | 17A |       |       |      | BadR2, LowEfficiency, CtIsS  |
| sulA/foIP-01 | 17A | 19.92 | 80.8  | 2.09 |                              |
| sulA/foIP-03 | 17A | 20.48 | 83.54 | 2.04 |                              |
| tet(32)      | 17A | 24.84 | 81.28 | 1.96 |                              |
| tet(34)      | 17A | 31.5  | 75.35 | 1.9  |                              |
| tet(35)      | 17A | 35.72 | 75.89 | 2.01 | MultipleMeltPeaks            |
| tet(36)-A    | 17A | 35.53 | 81.94 | 1.9  |                              |
| tet(36)-B    | 17A |       |       |      | LowEfficiency, CtIsSmall, Ci |
| tet(37)      | 17A | 23.67 | 76.34 | 1.97 | MultipleMeltPeaks            |
| tetA-01      | 17A | 29.75 | 85.19 | 1.97 |                              |
| tetA-02      | 17A | 34.08 | 84.99 | 1.92 |                              |
| tetB-01      | 17A | 30.86 | 87.84 | 2.02 |                              |
| tetB-02      | 17A |       |       |      | LowEfficiency, CtIsSmall, Ci |
| tetC-01      | 17A |       |       |      | NoAmplification              |
| tetC-02      | 17A |       |       |      | LowEfficiency, CtIsSmall, S  |
| tetD-01      | 17A |       |       |      | LowEfficiency, CtIsSmall, Ci |
| tetD-02      | 17A |       |       |      | LowEfficiency, CtIsSmall, S  |
| tetE         | 17A |       |       |      | LowEfficiency, CtIsSmall, Ci |
| tetG-01      | 17A | 32.77 | 87.22 | 2.16 |                              |
| tetG-02      | 17A | 32.1  | 89.7  | 2.01 |                              |
| tetH         | 17A |       |       |      | LowEfficiency, CtIsSmall, Ci |
| tetJ         | 17A | 32.8  | 79.89 | 1.95 |                              |
| tetK         | 17A |       |       |      | LowEfficiency, CtIsSmall, Ci |
| tetL-01      | 17A |       |       |      | CurveFitFailed               |
| tetL-02      | 17A | 31.98 | 85.27 | 1.83 |                              |
| tetM-01      | 17A | 19.29 | 76.1  | 2.09 |                              |
| tetM-02      | 17A | 19.21 | 77.51 | 2.18 |                              |
| tetO-01      | 17A | 20.14 | 76.75 | 2.17 |                              |
| tetPA        | 17A |       |       |      | LowEfficiency, CtIsSmall, Ci |
| tetPB-01     | 17A |       |       |      | BadR2, LowEfficiency, CtIsS  |
| tetPB-02     | 17A | 27.66 | 84.76 | 2.12 |                              |
| tetPB-03     | 17A |       |       |      | LowEfficiency, CtIsSmall, Ci |
| tetPB-05     | 17A |       |       |      | CurveFitFailed               |
| tetQ         | 17A | 21.44 | 75.95 | 2.11 |                              |
| tetR-02      | 17A | 30.26 | 89.76 | 1.95 |                              |
| tetR-03      | 17A |       |       |      | LowEfficiency, CtIsSmall, S  |
| tetS         | 17A | 33.52 | 87.06 | 2.37 | MultipleMeltPeaks            |

|             |     |       |       |      |                              |
|-------------|-----|-------|-------|------|------------------------------|
| tetT        | 17A |       |       |      | LowEfficiency, CtIsSmall, Ci |
| tetU-01     | 17A |       |       |      | LowEfficiency, CtIsSmall, Ci |
| tetV        | 17A |       |       |      | LowEfficiency, CtIsSmall, Ci |
| tetW-01     | 17A | 22.61 | 81.81 | 2.03 |                              |
| tetX        | 17A |       |       |      | BadR2, CtIsSmall, Saturatio  |
| tnpA-01     | 17A | 36.21 | 79.29 | 2.01 | MultipleMeltPeaks            |
| tnpA-02     | 17A | 35.32 | 84.67 | 1.78 |                              |
| tnpA-03     | 17A | 29.89 | 77.6  | 2.06 |                              |
| tnpA-04     | 17A |       |       |      | BadR2, LowEfficiency, CtIsS  |
| tnpA-05     | 17A | 36.36 | 75.52 | 1.85 | MultipleMeltPeaks            |
| tnpA-07     | 17A |       |       |      | LowEfficiency, CtIsSmall, Ci |
| tolC-01     | 17A |       |       |      | BadR2, LowEfficiency, CtIsS  |
| tolC-02     | 17A | 29.85 | 85.64 | 2.08 |                              |
| tolC-03     | 17A | 30.59 | 87.87 | 2.07 | MultipleMeltPeaks            |
| Tp614       | 17A | 33.62 | 83.57 | 2    |                              |
| ttgA        | 17A | 33.36 | 77.35 | 1.86 |                              |
| ttgB        | 17A | 33.25 | 88.05 | 2.04 | MultipleMeltPeaks            |
| vanA        | 17A |       |       |      | LowEfficiency, CtIsSmall, Ci |
| vanB-01     | 17A | 31.02 | 79.48 | 1.98 | MultipleMeltPeaks            |
| vanC-01     | 17A |       |       |      | LowEfficiency, CtIsSmall, Ci |
| vanC-02     | 17A |       |       |      | LowEfficiency, CtIsSmall, Ci |
| vanC-03     | 17A | 25.38 | 86.17 | 2.01 |                              |
| vanC1       | 17A |       |       |      | LowEfficiency, CtIsSmall, Ci |
| vanC2/vanC3 | 17A |       |       |      | CurveFitFailed               |
| vanG        | 17A |       |       |      | LowEfficiency, CtIsSmall, Ci |
| vanHB       | 17A | 34.66 | 89.98 | 1.89 |                              |
| vanHD       | 17A | 35.23 | 85.69 | 1.89 | MultipleMeltPeaks            |
| vanRA-01    | 17A |       |       |      | LowEfficiency, CtIsSmall, Ci |
| vanRA-02    | 17A |       |       |      | LowEfficiency, CtIsSmall, Ci |
| vanRB       | 17A | 31.52 | 87.42 | 2    | MultipleMeltPeaks            |
| vanRC       | 17A |       |       |      | CurveFitFailed               |
| vanRC4      | 17A |       |       |      | LowEfficiency, CtIsSmall, Ci |
| vanRD       | 17A |       |       |      | LowEfficiency, CtIsSmall, Ci |
| vanSA       | 17A |       |       |      | CurveFitFailed               |
| vanSB       | 17A |       |       |      | CurveFitFailed               |
| vanSC-01    | 17A |       |       |      | LowEfficiency, CtIsSmall, S; |
| vanSC-02    | 17A |       |       |      | LowEfficiency, CtIsSmall, Ci |
| vanTC-01    | 17A |       |       |      | LowEfficiency, CtIsSmall, Ci |
| vanTC-02    | 17A |       |       |      | LowEfficiency, CtIsSmall, Ci |
| vanTE       | 17A |       |       |      | LowEfficiency, CtIsSmall, S; |
| vanTG       | 17A |       |       |      | LowEfficiency, CtIsSmall, Ci |
| vanWB       | 17A |       |       |      | LowEfficiency, CtIsSmall, Ci |
| vanWG       | 17A |       |       |      | LowEfficiency, CtIsSmall, Ci |
| vanXA       | 17A |       |       |      | CurveFitFailed               |
| vanXB       | 17A |       |       |      | LowEfficiency, CtIsSmall, Ci |
| vanXD       | 17A |       |       |      | CurveFitFailed               |

|              |     |       |       |      |                              |
|--------------|-----|-------|-------|------|------------------------------|
| vanYB        | 17A | 32.12 | 84.74 | 1.86 |                              |
| vanYD-01     | 17A | 29.75 | 88.69 | 1.81 |                              |
| vanYD-02     | 17A |       |       |      | CurveFitFailed               |
| vatB-01      | 17A |       |       |      | CurveFitFailed               |
| vatB-02      | 17A |       |       |      | LowEfficiency, CtIsSmall, Ci |
| vatC-01      | 17A |       |       |      | LowEfficiency, CtIsSmall, Sè |
| vatC-02      | 17A | 31.58 | 87.59 | 1.87 |                              |
| vatE-01      | 17A | 29.67 | 76.34 | 2.11 |                              |
| vatE-02      | 17A |       |       |      | NoAmplification              |
| vgaA-01      | 17A |       |       |      | CurveFitFailed               |
| vgaA-02      | 17A |       |       |      | CurveFitFailed               |
| vgb-01       | 17A | 30.92 | 87.14 | 1.92 |                              |
| vgbB-01      | 17A | 36.51 | 87.5  | 1.76 |                              |
| vgbB-02      | 17A |       |       |      | LowEfficiency, CtIsSmall, Ci |
| yceE/mdtG-0  | 17A |       |       |      | LowEfficiency, CtIsSmall, Sè |
| yceE/mdtG-0  | 17A |       |       |      | LowEfficiency, CtIsSmall, Ci |
| yceL/mdtH-0  | 17A | 30.48 | 87.14 | 1.92 |                              |
| yceL/mdtH-0  | 17A |       |       |      | LowEfficiency, CtIsSmall, Ci |
| yceL/mdtH-0  | 17A | 33.26 | 89.07 | 2.02 |                              |
| yidY/mdtL-01 | 17A | 32.16 | 84.24 | 1.87 |                              |
| yidY/mdtL-02 | 17A |       |       |      | LowEfficiency, CtIsSmall, Ci |































| Assay          | Sample | Ct    | Tm    | Efficiency | flag                         |
|----------------|--------|-------|-------|------------|------------------------------|
| 16S rRNA       | 17B    |       | 15.28 | 82.31      | 1.92                         |
| aac            | 17B    |       |       |            | LowEfficiency, CtIsSmall, S: |
| aac(6')-Ib(akz | 17B    |       |       |            | LowEfficiency, CtIsSmall, S: |
| aac(6')-Ib(akz | 17B    |       |       |            | CurveFitFailed               |
| aac(6')-Ib(akz | 17B    |       |       |            | LowEfficiency, CtIsSmall, S: |
| aac(6')-II     | 17B    |       |       |            | LowEfficiency, CtIsSmall, C: |
| aac(6')I1      | 17B    |       |       |            | LowEfficiency, CtIsSmall, C: |
| aacA/aphD      | 17B    |       |       |            | CurveFitFailed               |
| aacC           | 17B    | 33.84 | 88.66 | 1.82       |                              |
| aacC1          | 17B    |       |       |            | LowEfficiency, CtIsSmall, C: |
| aacC2          | 17B    |       |       |            | LowEfficiency, CtIsSmall, S: |
| aacC4          | 17B    | 36.94 | 89.78 | 1.8        | MultipleMeltPeaks            |
| aadA-01        | 17B    |       |       |            | CurveFitFailed               |
| aadA-02        | 17B    |       |       |            | CurveFitFailed               |
| aadA-1-01      | 17B    | 34.09 | 81.57 | 2.02       | MultipleMeltPeaks            |
| aadA-1-02      | 17B    |       |       |            | LowEfficiency, CtIsSmall, S: |
| aadA1          | 17B    |       |       |            | CurveFitFailed               |
| aadA2-01       | 17B    |       |       |            | CurveFitFailed               |
| aadA2-02       | 17B    | 32.84 | 75.03 | 1.87       |                              |
| aadA2-03       | 17B    |       |       |            | CurveFitFailed               |
| aadA5-01       | 17B    |       |       |            | LowEfficiency, CtIsSmall, S: |
| aadA5-02       | 17B    | 35.04 | 86.39 | 1.98       | MultipleMeltPeaks            |
| aadA9-01       | 17B    |       |       |            | LowEfficiency, CtIsSmall, S: |
| aadA9-02       | 17B    |       |       |            | CurveFitFailed               |
| aadD           | 17B    |       |       |            | CurveFitFailed               |
| aadE           | 17B    |       |       |            | LowEfficiency, CtIsSmall, S: |
| acrA-01        | 17B    | 32.49 | 88.82 | 1.96       |                              |
| acrA-02        | 17B    |       |       |            | CurveFitFailed               |
| acrA-03        | 17B    | 34.38 | 78.84 | 1.73       | MultipleMeltPeaks            |
| acrA-04        | 17B    | 31.89 | 88.08 | 1.85       | MultipleMeltPeaks            |
| acrA-05        | 17B    | 31.83 | 81.73 | 1.9        | MultipleMeltPeaks            |
| acrB-01        | 17B    | 36.31 | 88.61 | 1.96       | MultipleMeltPeaks            |
| acrF           | 17B    | 31.76 | 82.42 | 1.7        |                              |
| acrR-01        | 17B    |       |       |            | CurveFitFailed               |
| acrR-02        | 17B    |       |       |            | CurveFitFailed               |
| Actin          | 17B    | 20.36 | 87.08 | 1.95       |                              |
| adeA           | 17B    | 34.6  | 83.67 | 1.88       |                              |
| ampC-01        | 17B    |       |       |            | CurveFitFailed               |
| ampC-02        | 17B    |       |       |            | LowEfficiency, CtIsSmall, S: |
| ampC-04        | 17B    | 31.92 | 78.66 | 1.77       |                              |
| ampC-05        | 17B    |       |       |            | LowEfficiency, CtIsSmall, S: |
| ampC-06        | 17B    |       |       |            | LowEfficiency, CtIsSmall, S: |
| ampC-07        | 17B    |       |       |            | CurveFitFailed               |
| ampC-09        | 17B    |       |       |            | CurveFitFailed               |
| ampC/blaDH     | 17B    |       |       |            | BadR2, LowEfficiency, CtIsS  |

|                            |     |       |       |      |                                          |
|----------------------------|-----|-------|-------|------|------------------------------------------|
| aph                        | 17B |       |       |      | LowEfficiency, CtIsSmall, S <sub>e</sub> |
| aph(2')-Id-01              | 17B |       |       |      | LowEfficiency, CtIsSmall, S <sub>e</sub> |
| aph(2')-Id-02              | 17B |       |       |      | LowEfficiency, CtIsSmall, C <sub>i</sub> |
| aph6ia                     | 17B | 31.38 | 78.01 | 1.86 | MultipleMeltPeaks                        |
| aphA1(aka k <sub>a</sub> ) | 17B | 29.59 | 76    | 1.93 |                                          |
| bacA-01                    | 17B |       |       |      | BadR2, LowEfficiency, CtIsS <sub>e</sub> |
| bacA-02                    | 17B |       |       |      | CurveFitFailed                           |
| BETA-globin                | 17B | 20.77 | 84.25 | 1.96 |                                          |
| bla-ACC-1                  | 17B |       |       |      | CurveFitFailed                           |
| bla-L1                     | 17B | 34.26 | 85.39 | 2    |                                          |
| bla1                       | 17B |       |       |      | LowEfficiency, CtIsSmall, C <sub>i</sub> |
| blaCMY                     | 17B | 35.28 | 76.07 | 1.89 | MultipleMeltPeaks                        |
| blaCMY2-01                 | 17B |       |       |      | LowEfficiency, CtIsSmall, S <sub>e</sub> |
| blaCMY2-02                 | 17B | 30.09 | 81.91 | 1.87 | MultipleMeltPeaks                        |
| blaCTX-M-01                | 17B | 30.03 | 85.11 | 1.74 |                                          |
| blaCTX-M-02                | 17B |       |       |      | LowEfficiency, CtIsSmall, S <sub>e</sub> |
| blaCTX-M-03                | 17B |       |       |      | LowEfficiency, CtIsSmall, S <sub>e</sub> |
| blaCTX-M-04                | 17B | 32.63 | 88.33 | 1.87 |                                          |
| blaCTX-M-05                | 17B |       |       |      | NoAmplification                          |
| blaCTX-M-06                | 17B |       |       |      | LowEfficiency, CtIsSmall, S <sub>e</sub> |
| blaGES                     | 17B |       |       |      | LowEfficiency, CtIsSmall, S <sub>e</sub> |
| blaIMP-01                  | 17B |       |       |      | CurveFitFailed                           |
| blaIMP-02                  | 17B |       |       |      | LowEfficiency, CtIsSmall, S <sub>e</sub> |
| blaMOX/blaC                | 17B |       |       |      | LowEfficiency, CtIsSmall, S <sub>e</sub> |
| blaOCH                     | 17B |       |       |      | NoAmplification                          |
| blaOKP                     | 17B |       |       |      | NoAmplification                          |
| blaOXA1/blaC               | 17B |       |       |      | LowEfficiency, CtIsSmall, S <sub>e</sub> |
| blaOXA10-01                | 17B |       |       |      | CurveFitFailed                           |
| blaOXA10-02                | 17B |       |       |      | LowEfficiency, CtIsSmall, S <sub>e</sub> |
| blaOXY                     | 17B |       |       |      | LowEfficiency, CtIsSmall, S <sub>e</sub> |
| blaPAO                     | 17B |       |       |      | LowEfficiency, CtIsSmall, C <sub>i</sub> |
| blaPER                     | 17B |       |       |      | CurveFitFailed                           |
| blaPSE                     | 17B |       |       |      | LowEfficiency, CtIsSmall, C <sub>i</sub> |
| blaROB                     | 17B |       |       |      | NoAmplification                          |
| blaSFO                     | 17B | 32.86 | 80.85 | 1.88 |                                          |
| blaSHV-01                  | 17B |       |       |      | LowEfficiency, CtIsSmall, S <sub>e</sub> |
| blaSHV-02                  | 17B | 33.46 | 79.91 | 2.02 |                                          |
| blaTEM                     | 17B | 28.07 | 79.53 | 1.85 |                                          |
| blaTLA                     | 17B |       |       |      | CurveFitFailed                           |
| blaVEB                     | 17B |       |       |      | LowEfficiency, CtIsSmall, C <sub>i</sub> |
| blaVIM                     | 17B |       |       |      | LowEfficiency, CtIsSmall, S <sub>e</sub> |
| blaZ                       | 17B |       |       |      | LowEfficiency, CtIsSmall, S <sub>e</sub> |
| carB                       | 17B |       |       |      | LowEfficiency, CtIsSmall, S <sub>e</sub> |
| catA1                      | 17B |       |       |      | NoAmplification                          |
| catB3                      | 17B |       |       |      | LowEfficiency, CtIsSmall, S <sub>e</sub> |
| catB8                      | 17B | 31.44 | 82.1  | 1.91 |                                          |

|            |     |       |       |      |                              |
|------------|-----|-------|-------|------|------------------------------|
| ceoA       | 17B |       |       |      | CurveFitFailed               |
| cepA       | 17B |       |       |      | LowEfficiency, CtIsSmall, S: |
| cfiA       | 17B | 33.31 | 84.38 | 2.01 |                              |
| cfr        | 17B |       |       |      | LowEfficiency, CtIsSmall, S: |
| cfxA       | 17B | 20.97 | 77.36 | 1.67 |                              |
| cmeA       | 17B |       |       |      | LowEfficiency, CtIsSmall, Ci |
| cmlA1-01   | 17B |       |       |      | LowEfficiency, CtIsSmall, Ci |
| cmlA1-02   | 17B | 35.17 | 87.39 | 1.9  |                              |
| cmr        | 17B |       |       |      | LowEfficiency, CtIsSmall, S: |
| cmx(A)     | 17B | 31.75 | 84.44 | 1.88 | MultipleMeltPeaks            |
| cphA-01    | 17B |       |       |      | CurveFitFailed               |
| cphA-02    | 17B | 30.8  | 76.91 | 1.93 |                              |
| dfrA1      | 17B |       |       |      | LowEfficiency, CtIsSmall, S: |
| dfrA12     | 17B |       |       |      | CurveFitFailed               |
| emrD       | 17B |       |       |      | CurveFitFailed               |
| ereA       | 17B |       |       |      | CurveFitFailed               |
| ereB       | 17B |       |       |      | CurveFitFailed               |
| erm(34)    | 17B |       |       |      | CurveFitFailed               |
| erm(35)    | 17B |       |       |      | CurveFitFailed               |
| erm(36)    | 17B |       |       |      | BadR2, LowEfficiency, CtIsS  |
| ermA       | 17B |       |       |      | LowEfficiency, CtIsSmall, Ci |
| ermA/ermTR | 17B |       |       |      | NoAmplification              |
| ermB       | 17B | 26.43 | 74.9  | 2.07 |                              |
| ermC       | 17B |       |       |      | LowEfficiency, CtIsSmall, S: |
| ermF       | 17B |       |       |      | LowEfficiency, CtIsSmall, S: |
| ermJ/ermD  | 17B |       |       |      | LowEfficiency, CtIsSmall, S: |
| ermK-01    | 17B |       |       |      | LowEfficiency, CtIsSmall, S: |
| ermK-02    | 17B |       |       |      | CurveFitFailed               |
| ermT-01    | 17B |       |       |      | CurveFitFailed               |
| ermT-02    | 17B |       |       |      | BadR2, LowEfficiency, CtIsS  |
| ermX       | 17B | 28.04 | 83.71 | 1.78 |                              |
| ermY       | 17B |       |       |      | LowEfficiency, CtIsSmall, S: |
| fabK       | 17B | 33.63 | 78.81 | 1.76 | MultipleMeltPeaks            |
| floR       | 17B | 36.69 | 83.55 | 1.91 | MultipleMeltPeaks            |
| folA       | 17B |       |       |      | NoAmplification              |
| fosB       | 17B |       |       |      | LowEfficiency, CtIsSmall, S: |
| fosX       | 17B |       |       |      | LowEfficiency, CtIsSmall, S: |
| fox5       | 17B | 29.07 | 86.16 | 1.82 |                              |
| imiR       | 17B |       |       |      | CurveFitFailed               |
| ImrA-01    | 17B |       |       |      | LowEfficiency, CtIsSmall, S: |
| intl       | 17B | 33.99 | 85.07 | 1.91 |                              |
| intl1      | 17B | 21.27 | 87.2  | 2.14 | MultipleMeltPeaks            |
| IS613      | 17B | 22.12 | 79.62 | 1.74 |                              |
| lnuA-01    | 17B |       |       |      | LowEfficiency, CtIsSmall, S: |
| lnuB-01    | 17B |       |       |      | LowEfficiency, CtIsSmall, S: |
| lnuB-02    | 17B |       |       |      | LowEfficiency, CtIsSmall, S: |

|                |     |       |       |      |                                          |
|----------------|-----|-------|-------|------|------------------------------------------|
| lnuC           | 17B |       |       |      | CurveFitFailed                           |
| marR-01        | 17B |       |       |      | LowEfficiency, CtIsSmall, S <sub>c</sub> |
| matA/mel       | 17B | 22.93 | 77.56 | 2.04 |                                          |
| mdet1          | 17B |       |       |      | LowEfficiency, CtIsSmall, C <sub>i</sub> |
| mdtA           | 17B |       |       |      | LowEfficiency, CtIsSmall, S <sub>c</sub> |
| mdtE/yhiU      | 17B | 34.73 | 90.51 | 1.86 |                                          |
| mecA           | 17B |       |       |      | LowEfficiency, CtIsSmall, S <sub>c</sub> |
| mefA           | 17B | 23.35 | 80.48 | 1.65 |                                          |
| mepA           | 17B |       |       |      | CurveFitFailed                           |
| mexA           | 17B |       |       |      | LowEfficiency, CtIsSmall, C <sub>i</sub> |
| mexD           | 17B |       |       |      | LowEfficiency, CtIsSmall, S <sub>c</sub> |
| mexE           | 17B | 34.59 | 82.65 | 1.96 |                                          |
| mexF           | 17B | 29.11 | 83.32 | 1.65 | MultipleMeltPeaks                        |
| mphA-01        | 17B | 28.64 | 89.44 | 2.09 |                                          |
| mphA-02        | 17B | 31.52 | 86.78 | 1.46 |                                          |
| mphB           | 17B |       |       |      | LowEfficiency, CtIsSmall, C <sub>i</sub> |
| mphC           | 17B |       |       |      | LowEfficiency, CtIsSmall, S <sub>c</sub> |
| msrA-01        | 17B |       |       |      | LowEfficiency, CtIsSmall, C <sub>i</sub> |
| msrC-01        | 17B |       |       |      | LowEfficiency, CtIsSmall, C <sub>i</sub> |
| mtrC-01        | 17B |       |       |      | LowEfficiency, CtIsSmall, C <sub>i</sub> |
| mtrC-02        | 17B |       |       |      | CurveFitFailed                           |
| mtrD-02        | 17B | 27.36 | 81.66 | 1.97 |                                          |
| mtrD-03        | 17B | 32.27 | 83.78 | 1.8  |                                          |
| NDM1           | 17B |       |       |      | LowEfficiency, CtIsSmall, S <sub>c</sub> |
| nimE           | 17B |       |       |      | LowEfficiency, CtIsSmall, S <sub>c</sub> |
| nisB           | 17B |       |       |      | CurveFitFailed                           |
| oleC           | 17B | 35.21 | 89.14 | 1.9  |                                          |
| oprD           | 17B | 27.95 | 86.72 | 1.99 | MultipleMeltPeaks                        |
| oprJ           | 17B | 31.59 | 87.7  | 1.97 | MultipleMeltPeaks                        |
| pbp            | 17B |       |       |      | LowEfficiency, CtIsSmall, S <sub>c</sub> |
| pbp2x          | 17B | 20.23 | 75.66 | 1.8  |                                          |
| Pbp5           | 17B |       |       |      | LowEfficiency, CtIsSmall, S <sub>c</sub> |
| penA           | 17B |       |       |      | CurveFitFailed                           |
| pikR1          | 17B | 33.56 | 89.58 | 1.97 |                                          |
| pikR2          | 17B | 33.32 | 85.27 | 1.92 |                                          |
| pmrA           | 17B | 20.03 | 79.47 | 2.12 |                                          |
| pncA           | 17B | 27.31 | 89.79 | 1.9  |                                          |
| putative multi | 17B |       |       |      | LowEfficiency, CtIsSmall, S <sub>c</sub> |
| qac            | 17B |       |       |      | LowEfficiency, CtIsSmall, S <sub>c</sub> |
| qacA           | 17B |       |       |      | LowEfficiency, CtIsSmall, S <sub>c</sub> |
| qacA/qacB      | 17B |       |       |      | CurveFitFailed                           |
| qacEdelta1-0   | 17B |       |       |      | LowEfficiency, CtIsSmall, S <sub>c</sub> |
| qacEdelta1-0   | 17B |       |       |      | LowEfficiency, CtIsSmall, S <sub>c</sub> |
| qacH-01        | 17B |       |       |      | CurveFitFailed                           |
| qacH-02        | 17B |       |       |      | LowEfficiency, CtIsSmall, S <sub>c</sub> |
| qnrA           | 17B |       |       |      | LowEfficiency, CtIsSmall, S <sub>c</sub> |



|              |     |       |       |      |                              |
|--------------|-----|-------|-------|------|------------------------------|
| rarD-02      | 17B |       |       |      | NoAmplification              |
| sat4         | 17B |       |       |      | CurveFitFailed               |
| sdeB         | 17B |       |       |      | LowEfficiency, CtIsSmall, S: |
| spcN-01      | 17B |       |       |      | LowEfficiency, CtIsSmall, C: |
| speA         | 17B |       |       |      | LowEfficiency, CtIsSmall, C: |
| str          | 17B |       |       |      | LowEfficiency, CtIsSmall, C: |
| strA         | 17B |       |       |      | LowEfficiency, CtIsSmall, S: |
| strB         | 17B |       |       |      | LowEfficiency, CtIsSmall, C: |
| sul1         | 17B |       |       |      | NoAmplification              |
| sul2         | 17B |       |       |      | LowEfficiency, CtIsSmall, S: |
| sulA/foIP-01 | 17B | 18.91 | 81.57 | 2.06 |                              |
| sulA/foIP-03 | 17B | 19.49 | 83.84 | 2.02 |                              |
| tet(32)      | 17B | 22.36 | 81.51 | 1.97 |                              |
| tet(34)      | 17B |       |       |      | CurveFitFailed               |
| tet(35)      | 17B |       |       |      | LowEfficiency, CtIsSmall, C: |
| tet(36)-A    | 17B |       |       |      | LowEfficiency, CtIsSmall, S: |
| tet(36)-B    | 17B |       |       |      | LowEfficiency, CtIsSmall, S: |
| tet(37)      | 17B | 22.41 | 76.63 | 1.94 |                              |
| tetA-01      | 17B |       |       |      | NoAmplification              |
| tetA-02      | 17B |       |       |      | CurveFitFailed               |
| tetB-01      | 17B |       |       |      | CurveFitFailed               |
| tetB-02      | 17B |       |       |      | LowEfficiency, CtIsSmall, C: |
| tetC-01      | 17B |       |       |      | NoAmplification              |
| tetC-02      | 17B |       |       |      | LowEfficiency, CtIsSmall, S: |
| tetD-01      | 17B |       |       |      | LowEfficiency, CtIsSmall, C: |
| tetD-02      | 17B |       |       |      | LowEfficiency, CtIsSmall, C: |
| tetE         | 17B |       |       |      | LowEfficiency, CtIsSmall, S: |
| tetG-01      | 17B |       |       |      | CurveFitFailed               |
| tetG-02      | 17B |       |       |      | CurveFitFailed               |
| tetH         | 17B |       |       |      | LowEfficiency, CtIsSmall, C: |
| tetJ         | 17B |       |       |      | CurveFitFailed               |
| tetK         | 17B |       |       |      | CurveFitFailed               |
| tetL-01      | 17B |       |       |      | CurveFitFailed               |
| tetL-02      | 17B |       |       |      | LowEfficiency, CtIsSmall, S: |
| tetM-01      | 17B | 19.11 | 76.08 | 2.1  |                              |
| tetM-02      | 17B | 19.16 | 77.52 | 2.14 |                              |
| tetO-01      | 17B | 18.82 | 76.83 | 2.11 |                              |
| tetPA        | 17B |       |       |      | LowEfficiency, CtIsSmall, C: |
| tetPB-01     | 17B |       |       |      | CurveFitFailed               |
| tetPB-02     | 17B | 30.04 | 84.83 | 2.07 |                              |
| tetPB-03     | 17B |       |       |      | CurveFitFailed               |
| tetPB-05     | 17B |       |       |      | CurveFitFailed               |
| tetQ         | 17B | 21.02 | 76.45 | 2.12 |                              |
| tetR-02      | 17B | 34.4  | 90.04 | 1.84 | MultipleMeltPeaks            |
| tetR-03      | 17B |       |       |      | LowEfficiency, CtIsSmall, S: |
| tetS         | 17B |       |       |      | CurveFitFailed               |

|             |     |       |       |      |                              |
|-------------|-----|-------|-------|------|------------------------------|
| tetT        | 17B |       |       |      | LowEfficiency, CtIsSmall, S: |
| tetU-01     | 17B |       |       |      | LowEfficiency, CtIsSmall, C: |
| tetV        | 17B |       |       |      | CurveFitFailed               |
| tetW-01     | 17B | 19.51 | 81.87 | 2.11 |                              |
| tetX        | 17B |       |       |      | NoAmplification              |
| tnpA-01     | 17B |       |       |      | CurveFitFailed               |
| tnpA-02     | 17B |       |       |      | LowEfficiency, CtIsSmall, S: |
| tnpA-03     | 17B | 29.64 | 78.22 | 1.86 |                              |
| tnpA-04     | 17B |       |       |      | LowEfficiency, CtIsSmall, S: |
| tnpA-05     | 17B |       |       |      | LowEfficiency, CtIsSmall, C: |
| tnpA-07     | 17B |       |       |      | CurveFitFailed               |
| tolC-01     | 17B |       |       |      | CurveFitFailed               |
| tolC-02     | 17B | 33.85 | 83.74 | 1.94 |                              |
| tolC-03     | 17B | 34.17 | 84.35 | 2    |                              |
| Tp614       | 17B |       |       |      | LowEfficiency, CtIsSmall, S: |
| ttgA        | 17B |       |       |      | LowEfficiency, CtIsSmall, S: |
| ttgB        | 17B | 32.33 | 79.34 | 1.9  |                              |
| vanA        | 17B |       |       |      | LowEfficiency, CtIsSmall, C: |
| vanB-01     | 17B |       |       |      | CurveFitFailed               |
| vanC-01     | 17B |       |       |      | LowEfficiency, CtIsSmall, S: |
| vanC-02     | 17B |       |       |      | LowEfficiency, CtIsSmall, C: |
| vanC-03     | 17B | 29.97 | 86.38 | 1.93 | MultipleMeltPeaks            |
| vanC1       | 17B |       |       |      | CurveFitFailed               |
| vanC2/vanC3 | 17B | 33.18 | 79.09 | 1.69 | MultipleMeltPeaks            |
| vanG        | 17B |       |       |      | LowEfficiency, CtIsSmall, C: |
| vanHB       | 17B |       |       |      | CurveFitFailed               |
| vanHD       | 17B | 33.66 | 75.51 | 1.87 |                              |
| vanRA-01    | 17B |       |       |      | LowEfficiency, CtIsSmall, C: |
| vanRA-02    | 17B |       |       |      | LowEfficiency, CtIsSmall, C: |
| vanRB       | 17B |       |       |      | CurveFitFailed               |
| vanRC       | 17B |       |       |      | CurveFitFailed               |
| vanRC4      | 17B |       |       |      | CurveFitFailed               |
| vanRD       | 17B |       |       |      | LowEfficiency, CtIsSmall, C: |
| vanSA       | 17B |       |       |      | LowEfficiency, CtIsSmall, S: |
| vanSB       | 17B |       |       |      | LowEfficiency, CtIsSmall, S: |
| vanSC-01    | 17B |       |       |      | LowEfficiency, CtIsSmall, S: |
| vanSC-02    | 17B |       |       |      | LowEfficiency, CtIsSmall, S: |
| vanTC-01    | 17B |       |       |      | LowEfficiency, CtIsSmall, S: |
| vanTC-02    | 17B |       |       |      | LowEfficiency, CtIsSmall, S: |
| vanTE       | 17B |       |       |      | LowEfficiency, CtIsSmall, S: |
| vanTG       | 17B |       |       |      | LowEfficiency, CtIsSmall, C: |
| vanWB       | 17B |       |       |      | LowEfficiency, CtIsSmall, S: |
| vanWG       | 17B |       |       |      | CurveFitFailed               |
| vanXA       | 17B |       |       |      | LowEfficiency, CtIsSmall, S: |
| vanXB       | 17B |       |       |      | CurveFitFailed               |
| vanXD       | 17B | 33.04 | 76.43 | 1.96 |                              |

|              |     |       |       |      |                              |
|--------------|-----|-------|-------|------|------------------------------|
| vanYB        | 17B |       |       |      | LowEfficiency, CtIsSmall, S: |
| vanYD-01     | 17B | 32.3  | 82.77 | 1.84 |                              |
| vanYD-02     | 17B |       |       |      | LowEfficiency, CtIsSmall, S: |
| vatB-01      | 17B |       |       |      | LowEfficiency, CtIsSmall, S: |
| vatB-02      | 17B |       |       |      | LowEfficiency, CtIsSmall, S: |
| vatC-01      | 17B |       |       |      | LowEfficiency, CtIsSmall, C: |
| vatC-02      | 17B |       |       |      | CurveFitFailed               |
| vatE-01      | 17B | 31.65 | 76.33 | 2.03 |                              |
| vatE-02      | 17B |       |       |      | CurveFitFailed               |
| vgaA-01      | 17B |       |       |      | CurveFitFailed               |
| vgaA-02      | 17B |       |       |      | LowEfficiency, CtIsSmall, S: |
| vgb-01       | 17B | 34.02 | 87.23 | 1.9  |                              |
| vgbB-01      | 17B | 34.41 | 80.79 | 1.97 |                              |
| vgbB-02      | 17B |       |       |      | LowEfficiency, CtIsSmall, S: |
| yceE/mdtG-0  | 17B |       |       |      | CurveFitFailed               |
| yceE/mdtG-0  | 17B |       |       |      | LowEfficiency, CtIsSmall, C: |
| yceL/mdtH-0  | 17B |       |       |      | LowEfficiency, CtIsSmall, S: |
| yceL/mdtH-0  | 17B |       |       |      | LowEfficiency, CtIsSmall, C: |
| yceL/mdtH-0  | 17B |       |       |      | LowEfficiency, CtIsSmall, S: |
| yidY/mdtL-01 | 17B |       |       |      | LowEfficiency, CtIsSmall, S: |
| yidY/mdtL-02 | 17B |       |       |      | LowEfficiency, CtIsSmall, C: |































| Assay          | Sample | Ct | Tm    | Efficiency | flag                         |
|----------------|--------|----|-------|------------|------------------------------|
| 16S rRNA       | 17C    |    | 13.9  | 82.29      | 1.97                         |
| aac            | 17C    |    | 33.39 | 81.55      | 1.67 MultipleMeltPeaks       |
| aac(6')-Ib(akz | 17C    |    |       |            | LowEfficiency, CtIsSmall, S: |
| aac(6')-Ib(akz | 17C    |    | 34.51 | 82.26      | 1.92                         |
| aac(6')-Ib(akz | 17C    |    | 38.96 | 81.51      | 1.75 MultipleMeltPeaks       |
| aac(6')-II     | 17C    |    |       |            | CurveFitFailed               |
| aac(6')I1      | 17C    |    | 33.12 | 89.85      | 1.95                         |
| aacA/aphD      | 17C    |    | 36.3  | 71.91      | 2.04                         |
| aacC           | 17C    |    | 28.32 | 90.03      | 2.03                         |
| aacC1          | 17C    |    | 35.84 | 80.35      | 1.92                         |
| aacC2          | 17C    |    | 28.06 | 83.45      | 1.97                         |
| aacC4          | 17C    |    | 30.35 | 91.2       | 2.04                         |
| aadA-01        | 17C    |    |       |            | LowEfficiency, CtIsSmall, C: |
| aadA-02        | 17C    |    | 36.64 | 80.64      | 1.85                         |
| aadA-1-01      | 17C    |    | 33.91 | 91.87      | 1.89                         |
| aadA-1-02      | 17C    |    | 35.44 | 84.48      | 1.85                         |
| aadA1          | 17C    |    | 37.95 | 80.71      | 1.89 MultipleMeltPeaks       |
| aadA2-01       | 17C    |    | 41.28 | 91.11      | 1.49 MultipleMeltPeaks       |
| aadA2-02       | 17C    |    | 33.26 | 75.16      | 2.03                         |
| aadA2-03       | 17C    |    |       |            | LowEfficiency, CtIsSmall, S: |
| aadA5-01       | 17C    |    | 36.87 | 85.51      | 1.77 MultipleMeltPeaks       |
| aadA5-02       | 17C    |    | 34.51 | 78.79      | 1.91 MultipleMeltPeaks       |
| aadA9-01       | 17C    |    | 34.87 | 84.64      | 1.91                         |
| aadA9-02       | 17C    |    |       |            | CurveFitFailed               |
| aadD           | 17C    |    |       |            | CurveFitFailed               |
| aadE           | 17C    |    | 35.13 | 72.56      | 2                            |
| acrA-01        | 17C    |    | 30.16 | 88.74      | 1.98                         |
| acrA-02        | 17C    |    | 31.3  | 90.52      | 2 MultipleMeltPeaks          |
| acrA-03        | 17C    |    | 29.81 | 78.83      | 1.77 MultipleMeltPeaks       |
| acrA-04        | 17C    |    | 28.09 | 90.61      | 1.87                         |
| acrA-05        | 17C    |    | 26.86 | 90.15      | 1.93                         |
| acrB-01        | 17C    |    | 34.06 | 77.9       | 1.97 MultipleMeltPeaks       |
| acrF           | 17C    |    | 29.96 | 82.78      | 1.76                         |
| acrR-01        | 17C    |    | 34.14 | 88.94      | 1.88                         |
| acrR-02        | 17C    |    | 37.15 | 81.66      | 1.86                         |
| Actin          | 17C    |    | 23.18 | 86.88      | 1.93                         |
| adeA           | 17C    |    | 38.3  | 90.44      | 1.75 MultipleMeltPeaks       |
| ampC-01        | 17C    |    | 32.36 | 80.59      | 2.02                         |
| ampC-02        | 17C    |    | 31.16 | 87.91      | 1.93                         |
| ampC-04        | 17C    |    | 32.41 | 78.4       | 1.77                         |
| ampC-05        | 17C    |    | 37.92 | 89.42      | 1.69 MultipleMeltPeaks       |
| ampC-06        | 17C    |    | 37.95 | 89.61      | 1.78 MultipleMeltPeaks       |
| ampC-07        | 17C    |    | 38.11 | 88.31      | 1.88 MultipleMeltPeaks       |
| ampC-09        | 17C    |    | 33.88 | 88.68      | 1.83 MultipleMeltPeaks       |
| ampC/blaDH     | 17C    |    | 32.8  | 76.91      | 1.99 MultipleMeltPeaks       |

|                            |     |       |       |      |                              |
|----------------------------|-----|-------|-------|------|------------------------------|
| aph                        | 17C |       |       |      | LowEfficiency, CtIsSmall, S: |
| aph(2')-Id-01              | 17C |       |       |      | LowEfficiency, CtIsSmall, S: |
| aph(2')-Id-02              | 17C |       |       |      | LowEfficiency, CtIsSmall, S: |
| aph6ia                     | 17C | 23.5  | 78.48 | 1.97 | MultipleMeltPeaks            |
| aphA1(aka k <sub>a</sub> ) | 17C |       |       |      | LowEfficiency, CtIsSmall, S: |
| bacA-01                    | 17C | 34.55 | 83.93 | 1.92 | MultipleMeltPeaks            |
| bacA-02                    | 17C |       |       |      | CurveFitFailed               |
| BETA-globin                | 17C | 23.77 | 84.02 | 1.98 |                              |
| bla-ACC-1                  | 17C | 34.79 | 91.49 | 1.8  |                              |
| bla-L1                     | 17C | 32.02 | 89.13 | 1.97 |                              |
| bla1                       | 17C |       |       |      | LowEfficiency, CtIsSmall, S: |
| blaCMY                     | 17C | 31.35 | 80.64 | 1.94 |                              |
| blaCMY2-01                 | 17C | 34.4  | 74.85 | 2.03 |                              |
| blaCMY2-02                 | 17C | 30.43 | 84.99 | 1.96 | MultipleMeltPeaks            |
| blaCTX-M-01                | 17C | 37.68 | 85.18 | 1.73 |                              |
| blaCTX-M-02                | 17C | 31.81 | 89.85 | 1.91 |                              |
| blaCTX-M-03                | 17C |       |       |      | LowEfficiency, CtIsSmall, C: |
| blaCTX-M-04                | 17C | 29.57 | 88.28 | 2.07 |                              |
| blaCTX-M-05                | 17C | 32.07 | 76.73 | 1.82 |                              |
| blaCTX-M-06                | 17C |       |       |      | NoAmplification              |
| blaGES                     | 17C |       |       |      | LowEfficiency, CtIsSmall, S: |
| blaIMP-01                  | 17C |       |       |      | CurveFitFailed               |
| blaIMP-02                  | 17C |       |       |      | LowEfficiency, CtIsSmall, S: |
| blaMOX/blaC                | 17C |       |       |      | CurveFitFailed               |
| blaOCH                     | 17C |       |       |      | NoAmplification              |
| blaOKP                     | 17C |       |       |      | NoAmplification              |
| blaOXA1/blaC               | 17C |       |       |      | LowEfficiency, CtIsSmall, S: |
| blaOXA10-01                | 17C |       |       |      | LowEfficiency, CtIsSmall, S: |
| blaOXA10-02                | 17C |       |       |      | CurveFitFailed               |
| blaOXY                     | 17C | 35.2  | 89.6  | 1.76 |                              |
| blaPAO                     | 17C |       |       |      | NoAmplification              |
| blaPER                     | 17C |       |       |      | CurveFitFailed               |
| blaPSE                     | 17C |       |       |      | NoAmplification              |
| blaROB                     | 17C |       |       |      | CurveFitFailed               |
| blaSFO                     | 17C | 30.64 | 89.54 | 1.94 | MultipleMeltPeaks            |
| blaSHV-01                  | 17C | 35.14 | 90.56 | 1.72 |                              |
| blaSHV-02                  | 17C |       |       |      | CurveFitFailed               |
| blaTEM                     | 17C |       |       |      | NoAmplification              |
| blaTLA                     | 17C |       |       |      | LowEfficiency, CtIsSmall, S: |
| blaVEB                     | 17C |       |       |      | NoAmplification              |
| blaVIM                     | 17C | 38.33 | 90.89 | 1.75 | MultipleMeltPeaks            |
| blaZ                       | 17C | 29.46 | 74.97 | 2.06 |                              |
| carB                       | 17C |       |       |      | CurveFitFailed               |
| catA1                      | 17C |       |       |      | NoAmplification              |
| catB3                      | 17C |       |       |      | CurveFitFailed               |
| catB8                      | 17C | 30.74 | 81.83 | 1.99 | MultipleMeltPeaks            |

|            |     |       |       |      |                              |
|------------|-----|-------|-------|------|------------------------------|
| ceoA       | 17C | 31.84 | 82.15 | 1.94 | MultipleMeltPeaks            |
| cepA       | 17C |       |       |      | NoAmplification              |
| cfiA       | 17C | 31.49 | 85.59 | 1.93 |                              |
| cfr        | 17C |       |       |      | CurveFitFailed               |
| cfxA       | 17C | 19.16 | 77.59 | 2.09 |                              |
| cmeA       | 17C |       |       |      | LowEfficiency, CtIsSmall, S: |
| cmlA1-01   | 17C | 34.38 | 89.5  | 1.91 | MultipleMeltPeaks            |
| cmlA1-02   | 17C | 36.93 | 86.85 | 1.85 |                              |
| cmr        | 17C |       |       |      | CurveFitFailed               |
| cmx(A)     | 17C | 29.12 | 84.17 | 1.98 | MultipleMeltPeaks            |
| cphA-01    | 17C | 31.29 | 89.4  | 1.95 |                              |
| cphA-02    | 17C | 31.18 | 83.86 | 1.99 |                              |
| dfrA1      | 17C | 34.94 | 82.1  | 1.97 |                              |
| dfrA12     | 17C | 33.11 | 83.99 | 1.93 | MultipleMeltPeaks            |
| emrD       | 17C | 28.61 | 90.42 | 1.86 |                              |
| ereA       | 17C |       |       |      | CurveFitFailed               |
| ereB       | 17C | 31.62 | 88.55 | 2.06 |                              |
| erm(34)    | 17C | 34.33 | 90.51 | 1.89 |                              |
| erm(35)    | 17C |       |       |      | LowEfficiency, CtIsSmall, S: |
| erm(36)    | 17C | 30.92 | 87.88 | 2.1  |                              |
| ermA       | 17C |       |       |      | CurveFitFailed               |
| ermA/ermTR | 17C |       |       |      | NoAmplification              |
| ermB       | 17C | 19.63 | 75.15 | 2.14 |                              |
| ermC       | 17C | 35.89 | 85.46 | 1.89 |                              |
| ermF       | 17C |       |       |      | CurveFitFailed               |
| ermJ/ermD  | 17C |       |       |      | LowEfficiency, CtIsSmall, C: |
| ermK-01    | 17C |       |       |      | LowEfficiency, CtIsSmall, S: |
| ermK-02    | 17C | 37.09 | 88.77 | 1.78 |                              |
| ermT-01    | 17C |       |       |      | CurveFitFailed               |
| ermT-02    | 17C |       |       |      | CurveFitFailed               |
| ermX       | 17C | 26.63 | 83.61 | 1.89 |                              |
| ermY       | 17C | 35.82 | 89.52 | 1.85 | MultipleMeltPeaks            |
| fabK       | 17C | 29.38 | 79.33 | 1.88 |                              |
| floR       | 17C | 39.48 | 65.12 | 1.68 | MultipleMeltPeaks            |
| folA       | 17C |       |       |      | NoAmplification              |
| fosB       | 17C |       |       |      | LowEfficiency, CtIsSmall, S: |
| fosX       | 17C |       |       |      | CurveFitFailed               |
| fox5       | 17C | 27.74 | 86.17 | 2    | MultipleMeltPeaks            |
| imiR       | 17C |       |       |      | CurveFitFailed               |
| ImrA-01    | 17C | 37.88 | 82.32 | 2.03 |                              |
| intl       | 17C | 31    | 84.74 | 1.95 |                              |
| intl1      | 17C | 21.56 | 87.09 | 2.04 |                              |
| IS613      | 17C | 18.78 | 79.69 | 2    |                              |
| lnuA-01    | 17C |       |       |      | LowEfficiency, CtIsSmall, S: |
| lnuB-01    | 17C |       |       |      | CurveFitFailed               |
| lnuB-02    | 17C | 38.6  | 86.76 | 1.76 | MultipleMeltPeaks            |

|                |     |       |       |                                          |
|----------------|-----|-------|-------|------------------------------------------|
| lnuC           | 17C | 35.27 | 87.49 | 1.82                                     |
| marR-01        | 17C | 33.66 | 82.29 | 1.93                                     |
| matA/mel       | 17C | 16.74 | 77.79 | 2.07                                     |
| mdet1          | 17C |       |       | CurveFitFailed                           |
| mdtA           | 17C | 36.68 | 81.94 | 1.7 MultipleMeltPeaks                    |
| mdtE/yhiU      | 17C | 30.17 | 91.04 | 1.91                                     |
| mecA           | 17C | 29.42 | 74.69 | 1.99                                     |
| mefA           | 17C | 15.81 | 80.54 | 1.99                                     |
| mepA           | 17C | 29.11 | 90.8  | 2.04                                     |
| mexA           | 17C | 36.58 | 81.69 | 1.85 MultipleMeltPeaks                   |
| mexD           | 17C |       |       | NoAmplification                          |
| mexE           | 17C | 36.03 | 90.04 | 1.81 MultipleMeltPeaks                   |
| mexF           | 17C | 26.38 | 87.09 | 1.94 MultipleMeltPeaks                   |
| mphA-01        | 17C | 25.13 | 89.19 | 1.93                                     |
| mphA-02        | 17C | 27.93 | 89.38 | 1.8 MultipleMeltPeaks                    |
| mphB           | 17C | 33.25 | 88.59 | 2.04                                     |
| mphC           | 17C |       |       | CurveFitFailed                           |
| msrA-01        | 17C |       |       | LowEfficiency, CtIsSmall, Ci             |
| msrC-01        | 17C |       |       | NoAmplification                          |
| mtrC-01        | 17C | 35.38 | 84.04 | 1.84                                     |
| mtrC-02        | 17C | 36.58 | 83.96 | 1.76 MultipleMeltPeaks                   |
| mtrD-02        | 17C | 26.98 | 81.62 | 1.99                                     |
| mtrD-03        | 17C | 26.74 | 83.53 | 1.94 MultipleMeltPeaks                   |
| NDM1           | 17C |       |       | CurveFitFailed                           |
| nimE           | 17C | 35.28 | 75.86 | 2.04                                     |
| nisB           | 17C | 32.39 | 87.46 | 2.02 MultipleMeltPeaks                   |
| oleC           | 17C | 31.89 | 89.04 | 1.93                                     |
| oprD           | 17C | 26.03 | 91.86 | 1.95                                     |
| oprJ           | 17C | 25.8  | 91.69 | 2.04                                     |
| pbp            | 17C |       |       | CurveFitFailed                           |
| pbp2x          | 17C |       |       | LowEfficiency, CtIsSmall, Ci             |
| Pbp5           | 17C |       |       | LowEfficiency, CtIsSmall, S <sub>c</sub> |
| penA           | 17C | 32.3  | 89.61 | 1.9                                      |
| pikR1          | 17C | 29.99 | 89.49 | 1.97                                     |
| pikR2          | 17C | 32.56 | 85.26 | 1.99                                     |
| pmrA           | 17C | 21.72 | 79.46 | 2.11                                     |
| pncA           | 17C | 27.05 | 89.69 | 1.88                                     |
| putative multi | 17C |       |       | LowEfficiency, CtIsSmall, S <sub>c</sub> |
| qac            | 17C |       |       | LowEfficiency, CtIsSmall, S <sub>c</sub> |
| qacA           | 17C |       |       | LowEfficiency, CtIsSmall, Ci             |
| qacA/qacB      | 17C |       |       | NoAmplification                          |
| qacEdelta1-0   | 17C |       |       | LowEfficiency, CtIsSmall, S <sub>c</sub> |
| qacEdelta1-0   | 17C | 35.91 | 74.87 | 1.83                                     |
| qacH-01        | 17C | 32.74 | 88.05 | 1.97 MultipleMeltPeaks                   |
| qacH-02        | 17C | 30.28 | 86.79 | 1.94                                     |
| qnrA           | 17C | 38.52 | 80.41 | 1.81 MultipleMeltPeaks                   |

|              |     |       |       |      |                                          |
|--------------|-----|-------|-------|------|------------------------------------------|
| rarD-02      | 17C |       |       |      | NoAmplification                          |
| sat4         | 17C |       |       |      | LowEfficiency, CtIsSmall, S <sub>c</sub> |
| sdeB         | 17C |       |       |      | CurveFitFailed                           |
| spcN-01      | 17C |       |       |      | LowEfficiency, CtIsSmall, C <sub>i</sub> |
| speA         | 17C |       |       |      | NoAmplification                          |
| str          | 17C |       |       |      | LowEfficiency, CtIsSmall, C <sub>i</sub> |
| strA         | 17C |       |       |      | CurveFitFailed                           |
| strB         | 17C |       |       |      | LowEfficiency, CtIsSmall, S <sub>c</sub> |
| sul1         | 17C | 35.06 | 88.7  | 1.76 |                                          |
| sul2         | 17C |       |       |      | CurveFitFailed                           |
| sulA/foIP-01 | 17C | 20.55 | 81.84 | 2.01 |                                          |
| sulA/foIP-03 | 17C | 21.14 | 83.13 | 2.01 |                                          |
| tet(32)      | 17C | 20.89 | 81.51 | 2.01 |                                          |
| tet(34)      | 17C | 28.43 | 76.19 | 2.02 |                                          |
| tet(35)      | 17C |       |       |      | NoAmplification                          |
| tet(36)-A    | 17C |       |       |      | CurveFitFailed                           |
| tet(36)-B    | 17C |       |       |      | LowEfficiency, CtIsSmall, S <sub>c</sub> |
| tet(37)      | 17C | 20.27 | 76.79 | 2    |                                          |
| tetA-01      | 17C | 35.84 | 85.08 | 1.84 |                                          |
| tetA-02      | 17C | 32.15 | 90.28 | 1.93 |                                          |
| tetB-01      | 17C | 34.97 | 86.04 | 1.89 |                                          |
| tetB-02      | 17C |       |       |      | CurveFitFailed                           |
| tetC-01      | 17C |       |       |      | NoAmplification                          |
| tetC-02      | 17C |       |       |      | CurveFitFailed                           |
| tetD-01      | 17C |       |       |      | LowEfficiency, CtIsSmall, S <sub>c</sub> |
| tetD-02      | 17C | 39.24 | 75.5  | 1.75 | MultipleMeltPeaks                        |
| tetE         | 17C |       |       |      | CurveFitFailed                           |
| tetG-01      | 17C | 35.69 | 85.13 | 1.88 |                                          |
| tetG-02      | 17C | 29.73 | 89.71 | 1.97 |                                          |
| tetH         | 17C |       |       |      | NoAmplification                          |
| tetJ         | 17C |       |       |      | CurveFitFailed                           |
| tetK         | 17C |       |       |      | CurveFitFailed                           |
| tetL-01      | 17C | 37.88 | 84.44 | 1.98 | MultipleMeltPeaks                        |
| tetL-02      | 17C | 32.19 | 78.07 | 1.97 | MultipleMeltPeaks                        |
| tetM-01      | 17C | 17.38 | 76.02 | 2.02 |                                          |
| tetM-02      | 17C | 17.3  | 77.34 | 2.06 |                                          |
| tetO-01      | 17C | 16.47 | 77.03 | 2.08 |                                          |
| tetPA        | 17C |       |       |      | NoAmplification                          |
| tetPB-01     | 17C | 38.59 | 84.17 | 1.78 | MultipleMeltPeaks                        |
| tetPB-02     | 17C | 29.61 | 84.3  | 2.15 |                                          |
| tetPB-03     | 17C |       |       |      | LowEfficiency, CtIsSmall, S <sub>c</sub> |
| tetPB-05     | 17C |       |       |      | LowEfficiency, CtIsSmall, S <sub>c</sub> |
| tetQ         | 17C | 18.8  | 76.23 | 2.05 |                                          |
| tetR-02      | 17C | 29.86 | 89.54 | 1.89 |                                          |
| tetR-03      | 17C |       |       |      | LowEfficiency, CtIsSmall, C <sub>i</sub> |
| tetS         | 17C | 35.05 | 87.6  | 1.98 |                                          |

|             |     |       |       |      |                              |
|-------------|-----|-------|-------|------|------------------------------|
| tetT        | 17C |       |       |      | CurveFitFailed               |
| tetU-01     | 17C |       |       |      | LowEfficiency, CtIsSmall, S: |
| tetV        | 17C |       |       |      | CurveFitFailed               |
| tetW-01     | 17C | 17.79 | 81.84 | 2.05 |                              |
| tetX        | 17C |       |       |      | LowEfficiency, CtIsSmall, Ci |
| tnpA-01     | 17C | 36.74 | 79.51 | 1.89 | MultipleMeltPeaks            |
| tnpA-02     | 17C | 38.8  | 84.25 | 1.8  | MultipleMeltPeaks            |
| tnpA-03     | 17C | 33.13 | 74.72 | 2.13 |                              |
| tnpA-04     | 17C |       |       |      | BadR2, LowEfficiency, CtIsS  |
| tnpA-05     | 17C |       |       |      | CurveFitFailed               |
| tnpA-07     | 17C |       |       |      | NoAmplification              |
| tolC-01     | 17C |       |       |      | CurveFitFailed               |
| tolC-02     | 17C | 32.17 | 84.05 | 1.95 | MultipleMeltPeaks            |
| tolC-03     | 17C | 34.31 | 84.42 | 1.94 |                              |
| Tp614       | 17C | 36.93 | 78.27 | 1.88 |                              |
| ttgA        | 17C | 35.49 | 82.36 | 1.86 | MultipleMeltPeaks            |
| ttgB        | 17C | 38.94 | 80.91 | 1.78 | MultipleMeltPeaks            |
| vanA        | 17C |       |       |      | NoAmplification              |
| vanB-01     | 17C | 34.17 | 84.03 | 2    |                              |
| vanC-01     | 17C |       |       |      | CurveFitFailed               |
| vanC-02     | 17C |       |       |      | CurveFitFailed               |
| vanC-03     | 17C | 27.77 | 86.75 | 1.98 | MultipleMeltPeaks            |
| vanC1       | 17C |       |       |      | CurveFitFailed               |
| vanC2/vanC3 | 17C | 34.29 | 84.63 | 1.97 |                              |
| vanG        | 17C |       |       |      | CurveFitFailed               |
| vanHB       | 17C | 32.72 | 82.74 | 1.94 | MultipleMeltPeaks            |
| vanHD       | 17C | 35.71 | 89.65 | 1.73 |                              |
| vanRA-01    | 17C |       |       |      | LowEfficiency, CtIsSmall, S: |
| vanRA-02    | 17C |       |       |      | LowEfficiency, CtIsSmall, Ci |
| vanRB       | 17C | 33.45 | 88.83 | 2.07 | MultipleMeltPeaks            |
| vanRC       | 17C |       |       |      | LowEfficiency, CtIsSmall, S: |
| vanRC4      | 17C |       |       |      | LowEfficiency, CtIsSmall, Ci |
| vanRD       | 17C |       |       |      | CurveFitFailed               |
| vanSA       | 17C |       |       |      | CurveFitFailed               |
| vanSB       | 17C |       |       |      | CurveFitFailed               |
| vanSC-01    | 17C |       |       |      | CurveFitFailed               |
| vanSC-02    | 17C |       |       |      | LowEfficiency, CtIsSmall, S: |
| vanTC-01    | 17C |       |       |      | CurveFitFailed               |
| vanTC-02    | 17C |       |       |      | CurveFitFailed               |
| vanTE       | 17C |       |       |      | CurveFitFailed               |
| vanTG       | 17C |       |       |      | CurveFitFailed               |
| vanWB       | 17C |       |       |      | LowEfficiency, CtIsSmall, S: |
| vanWG       | 17C |       |       |      | CurveFitFailed               |
| vanXA       | 17C |       |       |      | NoAmplification              |
| vanXB       | 17C |       |       |      | LowEfficiency, CtIsSmall, Ci |
| vanXD       | 17C | 30.53 | 75.14 | 2.06 |                              |

|              |     |       |       |      |                              |
|--------------|-----|-------|-------|------|------------------------------|
| vanYB        | 17C | 37.04 | 72.96 | 1.85 | MultipleMeltPeaks            |
| vanYD-01     | 17C | 30.71 | 89.04 | 1.77 | MultipleMeltPeaks            |
| vanYD-02     | 17C |       |       |      | LowEfficiency, CtIsSmall, S: |
| vatB-01      | 17C |       |       |      | CurveFitFailed               |
| vatB-02      | 17C |       |       |      | CurveFitFailed               |
| vatC-01      | 17C |       |       |      | CurveFitFailed               |
| vatC-02      | 17C | 36.79 | 82.22 | 1.81 | MultipleMeltPeaks            |
| vatE-01      | 17C | 29.03 | 76.91 | 2.15 |                              |
| vatE-02      | 17C | 37.3  | 75.54 | 1.97 |                              |
| vgaA-01      | 17C |       |       |      | CurveFitFailed               |
| vgaA-02      | 17C |       |       |      | CurveFitFailed               |
| vgb-01       | 17C | 32.3  | 87.08 | 1.94 |                              |
| vgbB-01      | 17C | 38.12 | 64.54 | 1.73 | MultipleMeltPeaks            |
| vgbB-02      | 17C |       |       |      | LowEfficiency, CtIsSmall, S: |
| yceE/mdtG-0  | 17C | 38.4  | 77.59 | 1.81 |                              |
| yceE/mdtG-0  | 17C |       |       |      | NoAmplification              |
| yceL/mdtH-0  | 17C | 30.9  | 83.75 | 1.99 | MultipleMeltPeaks            |
| yceL/mdtH-0  | 17C |       |       |      | NoAmplification              |
| yceL/mdtH-0  | 17C | 34.31 | 88.76 | 1.86 |                              |
| yidY/mdtL-01 | 17C | 39.45 | 77.72 | 1.76 | MultipleMeltPeaks            |
| yidY/mdtL-02 | 17C |       |       |      | CurveFitFailed               |































| Assay           | Sample | Ct | Tm    | Efficiency | flag                         |
|-----------------|--------|----|-------|------------|------------------------------|
| 16S rRNA        | 18A    |    | 14    | 82.2       | 2.04                         |
| aac             | 18A    |    | 30.7  | 89.96      | 1.51                         |
| aac(6')-Ib(akz) | 18A    |    |       |            | LowEfficiency, CtIsSmall, S  |
| aac(6')-Ib(akz) | 18A    |    | 30.9  | 81.57      | 1.99 MultipleMeltPeaks       |
| aac(6')-Ib(akz) | 18A    |    | 30.34 | 78.89      | 2.09                         |
| aac(6')-II      | 18A    |    | 37.9  | 81.12      | 1.56 MultipleMeltPeaks       |
| aac(6')I1       | 18A    |    | 35.24 | 88.68      | 1.81                         |
| aacA/aphD       | 18A    |    |       |            | CurveFitFailed               |
| aacC            | 18A    |    | 27.61 | 88.76      | 1.86                         |
| aacC1           | 18A    |    | 37.83 | 83.92      | 1.75                         |
| aacC2           | 18A    |    |       |            | NoAmplification              |
| aacC4           | 18A    |    | 33.6  | 90.27      | 1.96 MultipleMeltPeaks       |
| aadA-01         | 18A    |    |       |            | LowEfficiency, CtIsSmall, Ci |
| aadA-02         | 18A    |    | 36.43 | 80.46      | 1.85                         |
| aadA-1-01       | 18A    |    | 33.63 | 81.51      | 1.87                         |
| aadA-1-02       | 18A    |    |       |            | LowEfficiency, CtIsSmall, Ci |
| aadA1           | 18A    |    | 36.89 | 83.65      | 1.87                         |
| aadA2-01        | 18A    |    | 34.88 | 82.78      | 1.85                         |
| aadA2-02        | 18A    |    | 33.84 | 81.29      | 1.94                         |
| aadA2-03        | 18A    |    | 38.18 | 89.82      | 1.69 MultipleMeltPeaks       |
| aadA5-01        | 18A    |    |       |            | CurveFitFailed               |
| aadA5-02        | 18A    |    | 31.78 | 83.57      | 2.02 MultipleMeltPeaks       |
| aadA9-01        | 18A    |    | 37.68 | 92.39      | 1.71 MultipleMeltPeaks       |
| aadA9-02        | 18A    |    |       |            | CurveFitFailed               |
| aadD            | 18A    |    |       |            | LowEfficiency, CtIsSmall, Ci |
| aadE            | 18A    |    |       |            | LowEfficiency, CtIsSmall, Ci |
| acrA-01         | 18A    |    | 30.97 | 88.73      | 1.97 MultipleMeltPeaks       |
| acrA-02         | 18A    |    | 28.36 | 81.08      | 1.89 MultipleMeltPeaks       |
| acrA-03         | 18A    |    | 36.18 | 89.95      | 1.76                         |
| acrA-04         | 18A    |    | 28.9  | 82.58      | 1.97                         |
| acrA-05         | 18A    |    | 30.8  | 85.71      | 1.95 MultipleMeltPeaks       |
| acrB-01         | 18A    |    | 22.87 | 83.46      | 1.97                         |
| acrF            | 18A    |    | 27.87 | 82.98      | 1.8                          |
| acrR-01         | 18A    |    | 31.84 | 84.46      | 1.96 MultipleMeltPeaks       |
| acrR-02         | 18A    |    | 34.77 | 87.19      | 1.87 MultipleMeltPeaks       |
| Actin           | 18A    |    | 20.68 | 86.89      | 1.99                         |
| adeA            | 18A    |    |       |            | LowEfficiency, CtIsSmall, Ci |
| ampC-01         | 18A    |    | 32.04 | 85.53      | 1.98                         |
| ampC-02         | 18A    |    | 40.7  | 67.79      | 1.68 MultipleMeltPeaks       |
| ampC-04         | 18A    |    | 31.66 | 78.65      | 1.82 MultipleMeltPeaks       |
| ampC-05         | 18A    |    |       |            | BadR2, LowEfficiency, CtIsS  |
| ampC-06         | 18A    |    | 26.99 | 83.95      | 1.96                         |
| ampC-07         | 18A    |    | 35.16 | 86.51      | 1.81                         |
| ampC-09         | 18A    |    | 37.29 | 80.02      | 1.73 MultipleMeltPeaks       |
| ampC/blaDH      | 18A    |    | 33.33 | 83.55      | 1.92                         |

|                            |     |       |       |      |                                          |
|----------------------------|-----|-------|-------|------|------------------------------------------|
| aph                        | 18A |       |       |      | LowEfficiency, CtIsSmall, Ci             |
| aph(2')-Id-01              | 18A |       |       |      | LowEfficiency, CtIsSmall, Ci             |
| aph(2')-Id-02              | 18A |       |       |      | LowEfficiency, CtIsSmall, Ci             |
| aph6ia                     | 18A | 28.82 | 78.32 | 1.96 |                                          |
| aphA1(aka k <sub>z</sub> ) | 18A | 21.22 | 76.81 | 2.11 |                                          |
| bacA-01                    | 18A |       |       |      | CurveFitFailed                           |
| bacA-02                    | 18A | 34.18 | 83.52 | 1.78 | MultipleMeltPeaks                        |
| BETA-globin                | 18A | 22.35 | 84.08 | 1.99 |                                          |
| bla-ACC-1                  | 18A | 36.45 | 86    | 1.75 | MultipleMeltPeaks                        |
| bla-L1                     | 18A | 31.15 | 84.71 | 2.01 | MultipleMeltPeaks                        |
| bla1                       | 18A |       |       |      | LowEfficiency, CtIsSmall, Ci             |
| blaCMY                     | 18A |       |       |      | CurveFitFailed                           |
| blaCMY2-01                 | 18A | 27.01 | 82.76 | 2.08 |                                          |
| blaCMY2-02                 | 18A | 30.63 | 84.95 | 1.98 | MultipleMeltPeaks                        |
| blaCTX-M-01                | 18A |       |       |      | LowEfficiency, CtIsSmall, Ci             |
| blaCTX-M-02                | 18A | 33.21 | 89.88 | 1.98 |                                          |
| blaCTX-M-03                | 18A |       |       |      | LowEfficiency, CtIsSmall, Ci             |
| blaCTX-M-04                | 18A | 30.72 | 86.95 | 1.98 | MultipleMeltPeaks                        |
| blaCTX-M-05                | 18A |       |       |      | NoAmplification                          |
| blaCTX-M-06                | 18A |       |       |      | CurveFitFailed                           |
| blaGES                     | 18A |       |       |      | LowEfficiency, CtIsSmall, Ci             |
| blaIMP-01                  | 18A |       |       |      | NoAmplification                          |
| blaIMP-02                  | 18A | 34.87 | 85.25 | 1.92 |                                          |
| blaMOX/blaC                | 18A | 38.01 | 82.02 | 1.87 | MultipleMeltPeaks                        |
| blaOCH                     | 18A |       |       |      | NoAmplification                          |
| blaOKP                     | 18A |       |       |      | NoAmplification                          |
| blaOXA1/blaC               | 18A |       |       |      | LowEfficiency, CtIsSmall, S <sub>c</sub> |
| blaOXA10-01                | 18A |       |       |      | LowEfficiency, CtIsSmall, Ci             |
| blaOXA10-02                | 18A |       |       |      | LowEfficiency, CtIsSmall, S <sub>c</sub> |
| blaOXY                     | 18A | 32.48 | 91.07 | 1.83 |                                          |
| blaPAO                     | 18A |       |       |      | NoAmplification                          |
| blaPER                     | 18A |       |       |      | CurveFitFailed                           |
| blaPSE                     | 18A |       |       |      | NoAmplification                          |
| blaROB                     | 18A |       |       |      | NoAmplification                          |
| blaSFO                     | 18A | 31.13 | 86.97 | 1.93 | MultipleMeltPeaks                        |
| blaSHV-01                  | 18A | 33.24 | 88.71 | 1.93 |                                          |
| blaSHV-02                  | 18A | 35.53 | 83.91 | 1.91 |                                          |
| blaTEM                     | 18A | 21.79 | 79.32 | 2.05 |                                          |
| blaTLA                     | 18A |       |       |      | LowEfficiency, CtIsSmall, Ci             |
| blaVEB                     | 18A |       |       |      | NoAmplification                          |
| blaVIM                     | 18A | 38.73 | 65.36 | 1.8  | MultipleMeltPeaks                        |
| blaZ                       | 18A |       |       |      | LowEfficiency, CtIsSmall, Ci             |
| carB                       | 18A |       |       |      | LowEfficiency, CtIsSmall, Ci             |
| catA1                      | 18A |       |       |      | NoAmplification                          |
| catB3                      | 18A |       |       |      | BadR2, LowEfficiency, CtIsS              |
| catB8                      | 18A | 28.79 | 84.48 | 1.99 | MultipleMeltPeaks                        |

|            |     |       |       |      |                              |
|------------|-----|-------|-------|------|------------------------------|
| ceoA       | 18A | 31.99 | 82.35 | 1.95 |                              |
| cepA       | 18A |       |       |      | NoAmplification              |
| cfiA       | 18A | 30.67 | 87.74 | 1.92 |                              |
| cfr        | 18A |       |       |      | LowEfficiency, CtIsSmall, S: |
| cfxA       | 18A | 27.06 | 77.36 | 2.01 |                              |
| cmeA       | 18A |       |       |      | LowEfficiency, CtIsSmall, S: |
| cmlA1-01   | 18A | 36.75 | 87.68 | 1.81 | MultipleMeltPeaks            |
| cmlA1-02   | 18A | 36.67 | 89.87 | 1.76 | MultipleMeltPeaks            |
| cmr        | 18A |       |       |      | LowEfficiency, CtIsSmall, S: |
| cmx(A)     | 18A | 27.14 | 84.13 | 1.99 | MultipleMeltPeaks            |
| cphA-01    | 18A | 32.43 | 86.02 | 1.96 |                              |
| cphA-02    | 18A | 35.79 | 77.17 | 1.86 | MultipleMeltPeaks            |
| dfrA1      | 18A | 37.13 | 78.69 | 1.92 |                              |
| dfrA12     | 18A | 35.9  | 87.56 | 1.77 |                              |
| emrD       | 18A | 30.3  | 80.53 | 1.9  |                              |
| ereA       | 18A | 35.15 | 82.45 | 1.91 |                              |
| ereB       | 18A | 31.57 | 86.33 | 1.98 |                              |
| erm(34)    | 18A | 34.11 | 90.09 | 1.95 |                              |
| erm(35)    | 18A |       |       |      | LowEfficiency, CtIsSmall, C: |
| erm(36)    | 18A | 31.78 | 81.7  | 2.18 | MultipleMeltPeaks            |
| ermA       | 18A |       |       |      | LowEfficiency, CtIsSmall, C: |
| ermA/ermTR | 18A |       |       |      | NoAmplification              |
| ermB       | 18A |       |       |      | CurveFitFailed               |
| ermC       | 18A | 38.24 | 85.49 | 1.83 | MultipleMeltPeaks            |
| ermF       | 18A | 28.15 | 74.4  | 2.02 |                              |
| ermJ/ermD  | 18A |       |       |      | LowEfficiency, CtIsSmall, S: |
| ermK-01    | 18A | 36.91 | 74.05 | 1.94 |                              |
| ermK-02    | 18A | 37.04 | 83.95 | 1.68 |                              |
| ermT-01    | 18A |       |       |      | LowEfficiency, CtIsSmall, C: |
| ermT-02    | 18A |       |       |      | CurveFitFailed               |
| ermX       | 18A | 36.57 | 87.23 | 1.69 |                              |
| ermY       | 18A |       |       |      | CurveFitFailed               |
| fabK       | 18A | 20.11 | 78.83 | 2.11 |                              |
| floR       | 18A |       |       |      | NoAmplification              |
| folA       | 18A |       |       |      | NoAmplification              |
| fosB       | 18A |       |       |      | LowEfficiency, CtIsSmall, S: |
| fosX       | 18A |       |       |      | LowEfficiency, CtIsSmall, S: |
| fox5       | 18A | 27.6  | 86.49 | 1.98 |                              |
| imiR       | 18A |       |       |      | NoAmplification              |
| ImrA-01    | 18A | 37.79 | 80.06 | 1.88 |                              |
| intl       | 18A | 30.51 | 84.39 | 1.91 | MultipleMeltPeaks            |
| intl1      | 18A | 20.17 | 87.39 | 2.01 |                              |
| IS613      | 18A | 26.31 | 79.56 | 1.92 |                              |
| lnuA-01    | 18A |       |       |      | LowEfficiency, CtIsSmall, S: |
| lnuB-01    | 18A |       |       |      | LowEfficiency, CtIsSmall, C: |
| lnuB-02    | 18A | 32.52 | 87.12 | 1.95 |                              |

|                |     |       |       |      |                              |
|----------------|-----|-------|-------|------|------------------------------|
| lnuC           | 18A | 31.85 | 87.55 | 1.88 |                              |
| marR-01        | 18A | 32.2  | 90.09 | 1.93 |                              |
| matA/mel       | 18A | 17.32 | 77.85 | 2.09 |                              |
| mdetI1         | 18A |       |       |      | LowEfficiency, CtIsSmall, Ci |
| mdtA           | 18A | 34.45 | 80.33 | 1.93 | MultipleMeltPeaks            |
| mdtE/yhiU      | 18A | 33.13 | 89.37 | 1.78 |                              |
| mecA           | 18A |       |       |      | LowEfficiency, CtIsSmall, Ci |
| mefA           | 18A | 16.49 | 80.52 | 2.01 | MultipleMeltPeaks            |
| mepA           | 18A | 30.03 | 87.78 | 1.92 | MultipleMeltPeaks            |
| mexA           | 18A |       |       |      | NoAmplification              |
| mexD           | 18A | 32.99 | 80.11 | 2.04 |                              |
| mexE           | 18A | 35.3  | 90.85 | 1.85 | MultipleMeltPeaks            |
| mexF           | 18A | 28.22 | 81.16 | 1.91 | MultipleMeltPeaks            |
| mphA-01        | 18A | 30.34 | 88.74 | 1.86 | MultipleMeltPeaks            |
| mphA-02        | 18A | 28.98 | 86.72 | 1.45 |                              |
| mphB           | 18A | 32.66 | 87.41 | 1.88 |                              |
| mphC           | 18A |       |       |      | LowEfficiency, CtIsSmall, Ci |
| msrA-01        | 18A | 35.75 | 72.33 | 2.01 |                              |
| msrC-01        | 18A |       |       |      | NoAmplification              |
| mtrC-01        | 18A | 34.24 | 83.48 | 1.93 |                              |
| mtrC-02        | 18A | 33.95 | 84.07 | 1.92 |                              |
| mtrD-02        | 18A | 27.54 | 82    | 1.94 |                              |
| mtrD-03        | 18A | 36.3  | 80.58 | 1.82 | MultipleMeltPeaks            |
| NDM1           | 18A |       |       |      | LowEfficiency, CtIsSmall, Ci |
| nimE           | 18A |       |       |      | LowEfficiency, CtIsSmall, S: |
| nisB           | 18A | 39.52 | 74.32 | 1.79 | MultipleMeltPeaks            |
| oleC           | 18A | 31.32 | 88.89 | 1.89 |                              |
| oprD           | 18A | 28.13 | 87.5  | 2.03 |                              |
| oprJ           | 18A | 30.32 | 88.42 | 1.99 |                              |
| pbp            | 18A |       |       |      | LowEfficiency, CtIsSmall, S: |
| pbp2x          | 18A | 27.61 | 75.25 | 2.05 |                              |
| Pbp5           | 18A |       |       |      | LowEfficiency, CtIsSmall, S: |
| penA           | 18A | 35.13 | 89.47 | 1.77 | MultipleMeltPeaks            |
| pikR1          | 18A | 38.99 | 81.14 | 1.69 | MultipleMeltPeaks            |
| pikR2          | 18A | 30.99 | 85.45 | 2.06 | MultipleMeltPeaks            |
| pmrA           | 18A | 21.72 | 79.66 | 2.09 |                              |
| pncA           | 18A | 31.47 | 89.08 | 1.98 |                              |
| putative multi | 18A | 37.72 | 77.07 | 1.77 | MultipleMeltPeaks            |
| qac            | 18A | 36.7  | 87.28 | 1.86 |                              |
| qacA           | 18A | 35.79 | 70.19 | 1.83 |                              |
| qacA/qacB      | 18A |       |       |      | NoAmplification              |
| qacEdelta1-0   | 18A |       |       |      | LowEfficiency, CtIsSmall, Ci |
| qacEdelta1-0   | 18A | 36.38 | 74.5  | 1.93 | MultipleMeltPeaks            |
| qacH-01        | 18A | 32.64 | 90.35 | 1.99 |                              |
| qacH-02        | 18A | 36.26 | 83.87 | 1.67 | MultipleMeltPeaks            |
| qnrA           | 18A | 35.96 | 77.5  | 1.88 | MultipleMeltPeaks            |



|              |     |       |       |      |                             |
|--------------|-----|-------|-------|------|-----------------------------|
| rarD-02      | 18A |       |       |      | NoAmplification             |
| sat4         | 18A |       |       |      | CurveFitFailed              |
| sdeB         | 18A |       |       |      | LowEfficiency, CtIsSmall, S |
| spcN-01      | 18A | 37.57 | 85.66 | 1.83 |                             |
| speA         | 18A |       |       |      | NoAmplification             |
| str          | 18A |       |       |      | LowEfficiency, CtIsSmall, C |
| strA         | 18A |       |       |      | LowEfficiency, CtIsSmall, C |
| strB         | 18A | 20.94 | 84.25 | 1.97 |                             |
| sul1         | 18A | 31.69 | 89.93 | 1.92 |                             |
| sul2         | 18A | 24.13 | 85.96 | 2.03 |                             |
| sulA/foIP-01 | 18A | 16.78 | 81.31 | 2.02 |                             |
| sulA/foIP-03 | 18A | 17.23 | 81.93 | 2.03 |                             |
| tet(32)      | 18A | 27    | 81.24 | 1.97 |                             |
| tet(34)      | 18A | 32.55 | 75.53 | 1.99 |                             |
| tet(35)      | 18A |       |       |      | NoAmplification             |
| tet(36)-A    | 18A |       |       |      | CurveFitFailed              |
| tet(36)-B    | 18A |       |       |      | BadR2, LowEfficiency, CtIs  |
| tet(37)      | 18A | 25.28 | 76.03 | 1.99 |                             |
| tetA-01      | 18A | 28.83 | 85.18 | 1.94 |                             |
| tetA-02      | 18A | 34.25 | 88.08 | 1.89 |                             |
| tetB-01      | 18A | 31.23 | 88.28 | 1.98 | MultipleMeltPeaks           |
| tetB-02      | 18A |       |       |      | CurveFitFailed              |
| tetC-01      | 18A |       |       |      | NoAmplification             |
| tetC-02      | 18A |       |       |      | CurveFitFailed              |
| tetD-01      | 18A |       |       |      | LowEfficiency, CtIsSmall, C |
| tetD-02      | 18A | 32    | 84.04 | 2.04 |                             |
| tetE         | 18A |       |       |      | CurveFitFailed              |
| tetG-01      | 18A | 33.23 | 82.08 | 1.97 | MultipleMeltPeaks           |
| tetG-02      | 18A | 32.09 | 88.24 | 1.95 | MultipleMeltPeaks           |
| tetH         | 18A |       |       |      | LowEfficiency, CtIsSmall, C |
| tetJ         | 18A |       |       |      | LowEfficiency, CtIsSmall, C |
| tetK         | 18A |       |       |      | CurveFitFailed              |
| tetL-01      | 18A |       |       |      | BadR2, LowEfficiency, CtIs  |
| tetL-02      | 18A | 32.61 | 85.27 | 1.81 | MultipleMeltPeaks           |
| tetM-01      | 18A | 25.12 | 76.21 | 2    |                             |
| tetM-02      | 18A | 25.06 | 77.53 | 2.04 |                             |
| tetO-01      | 18A | 28.02 | 76.74 | 2.07 |                             |
| tetPA        | 18A |       |       |      | NoAmplification             |
| tetPB-01     | 18A | 36.37 | 90.26 | 1.86 |                             |
| tetPB-02     | 18A | 28.85 | 85.38 | 2.08 |                             |
| tetPB-03     | 18A |       |       |      | LowEfficiency, CtIsSmall, S |
| tetPB-05     | 18A |       |       |      | LowEfficiency, CtIsSmall, C |
| tetQ         | 18A | 24.14 | 76.25 | 2.04 |                             |
| tetR-02      | 18A | 30.66 | 89.81 | 1.91 |                             |
| tetR-03      | 18A |       |       |      | LowEfficiency, CtIsSmall, S |
| tetS         | 18A | 29.33 | 85.3  | 2.06 |                             |

|             |     |       |       |      |                                          |
|-------------|-----|-------|-------|------|------------------------------------------|
| tetT        | 18A |       |       |      | NoAmplification                          |
| tetU-01     | 18A |       |       |      | LowEfficiency, CtIsSmall, Ci             |
| tetV        | 18A |       |       |      | LowEfficiency, CtIsSmall, S <sub>e</sub> |
| tetW-01     | 18A | 21    | 81.83 | 2.01 |                                          |
| tetX        | 18A | 34.81 | 86.45 | 1.82 |                                          |
| tnpA-01     | 18A |       |       |      | LowEfficiency, CtIsSmall, S <sub>e</sub> |
| tnpA-02     | 18A | 21.61 | 84.8  | 1.82 | MultipleMeltPeaks                        |
| tnpA-03     | 18A |       |       |      | BadR2, LowEfficiency, CtIsS              |
| tnpA-04     | 18A | 28.28 | 81.75 | 1.97 |                                          |
| tnpA-05     | 18A | 21.3  | 80.95 | 1.94 |                                          |
| tnpA-07     | 18A |       |       |      | CurveFitFailed                           |
| tolC-01     | 18A | 37.3  | 80.22 | 1.86 |                                          |
| tolC-02     | 18A | 31.79 | 87.99 | 1.95 | MultipleMeltPeaks                        |
| tolC-03     | 18A | 31.95 | 86.51 | 1.97 |                                          |
| Tp614       | 18A | 35.76 | 87.8  | 1.86 | MultipleMeltPeaks                        |
| ttgA        | 18A | 37.09 | 91.16 | 1.69 | MultipleMeltPeaks                        |
| ttgB        | 18A | 35.28 | 88.7  | 1.87 |                                          |
| vanA        | 18A |       |       |      | NoAmplification                          |
| vanB-01     | 18A | 31.17 | 83.95 | 2.06 |                                          |
| vanC-01     | 18A |       |       |      | LowEfficiency, CtIsSmall, Ci             |
| vanC-02     | 18A |       |       |      | LowEfficiency, CtIsSmall, Ci             |
| vanC-03     | 18A | 26.72 | 91.61 | 1.99 |                                          |
| vanC1       | 18A |       |       |      | LowEfficiency, CtIsSmall, Ci             |
| vanC2/vanC3 | 18A | 33.43 | 79.67 | 1.79 | MultipleMeltPeaks                        |
| vanG        | 18A |       |       |      | LowEfficiency, CtIsSmall, Ci             |
| vanHB       | 18A | 31.94 | 80.1  | 2.04 |                                          |
| vanHD       | 18A | 36.56 | 88.55 | 1.76 |                                          |
| vanRA-01    | 18A |       |       |      | LowEfficiency, CtIsSmall, Ci             |
| vanRA-02    | 18A |       |       |      | LowEfficiency, CtIsSmall, Ci             |
| vanRB       | 18A | 32.97 | 87.53 | 2.16 | MultipleMeltPeaks                        |
| vanRC       | 18A |       |       |      | LowEfficiency, CtIsSmall, Ci             |
| vanRC4      | 18A |       |       |      | LowEfficiency, CtIsSmall, Ci             |
| vanRD       | 18A |       |       |      | CtIsSmall, SaturationBaseli              |
| vanSA       | 18A |       |       |      | LowEfficiency, CtIsSmall, S <sub>e</sub> |
| vanSB       | 18A |       |       |      | LowEfficiency, CtIsSmall, S <sub>e</sub> |
| vanSC-01    | 18A |       |       |      | LowEfficiency, CtIsSmall, S <sub>e</sub> |
| vanSC-02    | 18A |       |       |      | LowEfficiency, CtIsSmall, S <sub>e</sub> |
| vanTC-01    | 18A |       |       |      | LowEfficiency, CtIsSmall, S <sub>e</sub> |
| vanTC-02    | 18A |       |       |      | LowEfficiency, CtIsSmall, S <sub>e</sub> |
| vanTE       | 18A |       |       |      | LowEfficiency, CtIsSmall, S <sub>e</sub> |
| vanTG       | 18A |       |       |      | LowEfficiency, CtIsSmall, Ci             |
| vanWB       | 18A |       |       |      | LowEfficiency, CtIsSmall, Ci             |
| vanWG       | 18A | 31.29 | 76.19 | 1.99 |                                          |
| vanXA       | 18A |       |       |      | LowEfficiency, CtIsSmall, S <sub>e</sub> |
| vanXB       | 18A |       |       |      | LowEfficiency, CtIsSmall, Ci             |
| vanXD       | 18A | 31.57 | 75.23 | 2.05 |                                          |

|                |     |       |       |      |                              |
|----------------|-----|-------|-------|------|------------------------------|
| vanYB          | 18A |       |       |      | LowEfficiency, CtIsSmall, S  |
| vanYD-01       | 18A | 31.73 | 82.45 | 1.87 | MultipleMeltPeaks            |
| vanYD-02       | 18A |       |       |      | CurveFitFailed               |
| vatB-01        | 18A |       |       |      | BadR2, LowEfficiency, CtIsS  |
| vatB-02        | 18A | 33.06 | 79.67 | 1.88 |                              |
| vatC-01        | 18A | 37.19 | 81.26 | 1.77 |                              |
| vatC-02        | 18A | 37.77 | 87.64 | 1.87 |                              |
| vatE-01        | 18A | 29.61 | 76.8  | 2.05 |                              |
| vatE-02        | 18A | 36.07 | 83.9  | 1.81 |                              |
| vgaA-01        | 18A |       |       |      | LowEfficiency, CtIsSmall, Ct |
| vgaA-02        | 18A | 30.51 | 72.04 | 2.13 |                              |
| vgb-01         | 18A | 30.97 | 88.55 | 1.9  | MultipleMeltPeaks            |
| vgbB-01        | 18A | 39.06 | 65.29 | 1.81 | MultipleMeltPeaks            |
| vgbB-02        | 18A |       |       |      | LowEfficiency, CtIsSmall, Ct |
| yceE/mdtG-0    | 18A | 33.71 | 77.31 | 2.14 |                              |
| yceE/mdtG-0    | 18A |       |       |      | NoAmplification              |
| yceL/mdtH-0    | 18A | 30.88 | 75.69 | 1.83 | MultipleMeltPeaks            |
| yceL/mdtH-0    | 18A |       |       |      | NoAmplification              |
| yceL/mdtH-0    | 18A | 33.24 | 77.96 | 1.95 |                              |
| yidY/mdtL-01   | 18A | 34.11 | 87.81 | 1.89 |                              |
| yidY/mdtL-02   | 18A | 36.19 | 74.9  | 1.96 |                              |
| 16S rRNA       | 18B | 18.59 | 82.1  | 1.95 |                              |
| aac            | 18B | 29.68 | 81.69 | 1.74 | MultipleMeltPeaks            |
| aac(6')-Ib(akz | 18B |       |       |      | LowEfficiency, CtIsSmall, Ct |
| aac(6')-Ib(akz | 18B | 30.65 | 85.48 | 2.01 | MultipleMeltPeaks            |
| aac(6')-Ib(akz | 18B | 33.6  | 86.06 | 2.01 | MultipleMeltPeaks            |
| aac(6')-II     | 18B | 34.25 | 83.96 | 1.8  | MultipleMeltPeaks            |
| aac(6')I1      | 18B |       |       |      | LowEfficiency, CtIsSmall, Ct |
| aacA/aphD      | 18B |       |       |      | CurveFitFailed               |
| aacC           | 18B | 31.04 | 91.92 | 1.97 | MultipleMeltPeaks            |
| aacC1          | 18B | 35.15 | 83.94 | 1.91 |                              |
| aacC2          | 18B |       |       |      | NoAmplification              |
| aacC4          | 18B | 34.26 | 83.64 | 1.92 | MultipleMeltPeaks            |
| aadA-01        | 18B |       |       |      | LowEfficiency, CtIsSmall, S  |
| aadA-02        | 18B | 34.93 | 80.4  | 1.94 |                              |
| aadA-1-01      | 18B | 33.82 | 81.2  | 1.97 | MultipleMeltPeaks            |
| aadA-1-02      | 18B |       |       |      | LowEfficiency, CtIsSmall, Ct |
| aadA1          | 18B | 34.32 | 83.77 | 1.99 |                              |
| aadA2-01       | 18B |       |       |      | CurveFitFailed               |
| aadA2-02       | 18B |       |       |      | NoAmplification              |
| aadA2-03       | 18B |       |       |      | LowEfficiency, CtIsSmall, Ct |
| aadA5-01       | 18B | 32.33 | 78.5  | 1.97 |                              |
| aadA5-02       | 18B | 30.6  | 83.45 | 1.97 | MultipleMeltPeaks            |
| aadA9-01       | 18B | 34.94 | 80.32 | 1.9  | MultipleMeltPeaks            |
| aadA9-02       | 18B | 37.18 | 73.44 | 1.89 |                              |
| aadD           | 18B |       |       |      | LowEfficiency, CtIsSmall, S  |

|                            |     |       |       |      |                              |
|----------------------------|-----|-------|-------|------|------------------------------|
| aadE                       | 18B | 35.08 | 73.14 | 2.01 |                              |
| acrA-01                    | 18B | 31.47 | 88.74 | 2    |                              |
| acrA-02                    | 18B | 37.86 | 83.5  | 1.71 | MultipleMeltPeaks            |
| acrA-03                    | 18B |       |       |      | CurveFitFailed               |
| acrA-04                    | 18B | 29.05 | 80.64 | 2.03 |                              |
| acrA-05                    | 18B | 29.45 | 88.63 | 1.93 |                              |
| acrB-01                    | 18B |       |       |      | NoAmplification              |
| acrF                       | 18B | 24.06 | 82.95 | 1.82 |                              |
| acrR-01                    | 18B | 31.5  | 80.87 | 1.94 | MultipleMeltPeaks            |
| acrR-02                    | 18B | 32.51 | 86.89 | 2    |                              |
| Actin                      | 18B | 19.8  | 86.86 | 2    |                              |
| adeA                       | 18B |       |       |      | LowEfficiency, CtIsSmall, Se |
| ampC-01                    | 18B | 33.05 | 85.7  | 1.93 |                              |
| ampC-02                    | 18B |       |       |      | LowEfficiency, CtIsSmall, Se |
| ampC-04                    | 18B | 30.62 | 78.89 | 1.81 | MultipleMeltPeaks            |
| ampC-05                    | 18B |       |       |      | LowEfficiency, CtIsSmall, Ct |
| ampC-06                    | 18B | 38    | 82.02 | 1.86 | MultipleMeltPeaks            |
| ampC-07                    | 18B | 33.22 | 88.43 | 1.87 |                              |
| ampC-09                    | 18B |       |       |      | LowEfficiency, CtIsSmall, Ct |
| ampC/blaDH                 | 18B | 30.05 | 85.71 | 1.99 |                              |
| aph                        | 18B |       |       |      | CurveFitFailed               |
| aph(2')-Id-01              | 18B |       |       |      | LowEfficiency, CtIsSmall, Ct |
| aph(2')-Id-02              | 18B |       |       |      | LowEfficiency, CtIsSmall, Ct |
| aph6ia                     | 18B | 32.27 | 78.07 | 1.96 |                              |
| aphA1(aka k <sub>2</sub> ) | 18B | 35.32 | 77.54 | 1.92 | MultipleMeltPeaks            |
| bacA-01                    | 18B | 33.28 | 77.4  | 2    | MultipleMeltPeaks            |
| bacA-02                    | 18B | 31.98 | 86.76 | 1.86 |                              |
| BETA-globin                | 18B | 20.46 | 84.07 | 1.99 |                              |
| bla-ACC-1                  | 18B | 34.09 | 89.71 | 1.91 | MultipleMeltPeaks            |
| bla-L1                     | 18B | 30.11 | 84.32 | 1.96 |                              |
| bla1                       | 18B |       |       |      | LowEfficiency, CtIsSmall, Ct |
| blaCMY                     | 18B | 35.96 | 76.61 | 1.86 |                              |
| blaCMY2-01                 | 18B | 29.94 | 82.89 | 1.99 |                              |
| blaCMY2-02                 | 18B | 28.13 | 85.13 | 2    | MultipleMeltPeaks            |
| blaCTX-M-01                | 18B |       |       |      | NoAmplification              |
| blaCTX-M-02                | 18B | 31.96 | 83.59 | 1.93 |                              |
| blaCTX-M-03                | 18B |       |       |      | LowEfficiency, CtIsSmall, Ct |
| blaCTX-M-04                | 18B | 33.78 | 87.77 | 2.06 |                              |
| blaCTX-M-05                | 18B | 31.22 | 76.83 | 1.81 |                              |
| blaCTX-M-06                | 18B | 36.35 | 89.4  | 1.83 |                              |
| blaGES                     | 18B |       |       |      | LowEfficiency, CtIsSmall, Ct |
| blaIMP-01                  | 18B |       |       |      | LowEfficiency, CtIsSmall, Ct |
| blaIMP-02                  | 18B | 36.84 | 74.68 | 1.88 |                              |
| blaMOX/blaC                | 18B | 37.06 | 82.27 | 1.89 |                              |
| blaOCH                     | 18B |       |       |      | NoAmplification              |
| blaOKP                     | 18B |       |       |      | NoAmplification              |

|              |     |       |       |      |                              |
|--------------|-----|-------|-------|------|------------------------------|
| blaOXA1/blaC | 18B |       |       |      | CurveFitFailed               |
| blaOXA10-01  | 18B |       |       |      | LowEfficiency, CtIsSmall, Ct |
| blaOXA10-02  | 18B |       |       |      | LowEfficiency, CtIsSmall, Se |
| blaOXY       | 18B | 34.35 | 79.3  | 1.9  |                              |
| blaPAO       | 18B |       |       |      | NoAmplification              |
| blaPER       | 18B | 35.6  | 79    | 1.94 |                              |
| blaPSE       | 18B |       |       |      | NoAmplification              |
| blaROB       | 18B |       |       |      | NoAmplification              |
| blaSFO       | 18B | 29.97 | 86.12 | 1.9  | MultipleMeltPeaks            |
| blaSHV-01    | 18B | 32.04 | 73.68 | 2.02 | MultipleMeltPeaks            |
| blaSHV-02    | 18B | 34.46 | 79.57 | 1.85 |                              |
| blaTEM       | 18B | 24.64 | 79.61 | 2.02 |                              |
| blaTLA       | 18B |       |       |      | LowEfficiency, CtIsSmall, Ct |
| blaVEB       | 18B |       |       |      | NoAmplification              |
| blaVIM       | 18B |       |       |      | NoAmplification              |
| blaZ         | 18B |       |       |      | LowEfficiency, CtIsSmall, Ct |
| carB         | 18B |       |       |      | CurveFitFailed               |
| catA1        | 18B |       |       |      | NoAmplification              |
| catB3        | 18B | 34.68 | 87.54 | 1.88 | MultipleMeltPeaks            |
| catB8        | 18B | 28.22 | 84.14 | 2.01 | MultipleMeltPeaks            |
| ceoA         | 18B | 28.33 | 82.09 | 1.94 | MultipleMeltPeaks            |
| cepA         | 18B |       |       |      | LowEfficiency, CtIsSmall, Se |
| cfiA         | 18B | 30.54 | 87.31 | 1.81 |                              |
| cfr          | 18B |       |       |      | LowEfficiency, CtIsSmall, Ct |
| cfxA         | 18B | 26.5  | 77.45 | 2.02 |                              |
| cmeA         | 18B | 34.94 | 84.99 | 1.86 |                              |
| cmlA1-01     | 18B |       |       |      | BadR2, LowEfficiency, CtIsS  |
| cmlA1-02     | 18B | 38.22 | 81.77 | 1.88 | MultipleMeltPeaks            |
| cmr          | 18B |       |       |      | CurveFitFailed               |
| cmx(A)       | 18B | 25.53 | 84.77 | 2    | MultipleMeltPeaks            |
| cphA-01      | 18B | 29.95 | 85.3  | 2    | MultipleMeltPeaks            |
| cphA-02      | 18B | 36.12 | 82.4  | 1.9  |                              |
| dfrA1        | 18B | 35.72 | 78.66 | 1.85 |                              |
| dfrA12       | 18B | 32.53 | 87.12 | 1.97 |                              |
| emrD         | 18B |       |       |      | CurveFitFailed               |
| ereA         | 18B | 36.79 | 74.16 | 1.93 |                              |
| ereB         | 18B | 34.29 | 85.59 | 2.06 | MultipleMeltPeaks            |
| erm(34)      | 18B |       |       |      | NoAmplification              |
| erm(35)      | 18B |       |       |      | LowEfficiency, CtIsSmall, Ct |
| erm(36)      | 18B | 34.43 | 87.66 | 1.92 |                              |
| ermA         | 18B |       |       |      | LowEfficiency, CtIsSmall, Ct |
| ermA/ermTR   | 18B | 30.28 | 75.68 | 2    |                              |
| ermB         | 18B |       |       |      | LowEfficiency, CtIsSmall, Ct |
| ermC         | 18B | 35.2  | 82.66 | 2    |                              |
| ermF         | 18B |       |       |      | CurveFitFailed               |
| ermJ/ermD    | 18B |       |       |      | CurveFitFailed               |

|           |     |       |       |      |                                          |
|-----------|-----|-------|-------|------|------------------------------------------|
| ermK-01   | 18B |       |       |      | CurveFitFailed                           |
| ermK-02   | 18B | 36.13 | 87.48 | 1.71 | MultipleMeltPeaks                        |
| ermT-01   | 18B |       |       |      | LowEfficiency, CtIsSmall, Ct             |
| ermT-02   | 18B | 34.78 | 79.57 | 2.01 |                                          |
| ermX      | 18B | 34.32 | 83.3  | 1.81 | MultipleMeltPeaks                        |
| ermY      | 18B |       |       |      | LowEfficiency, CtIsSmall, Ct             |
| fabK      | 18B | 29.09 | 79.29 | 1.76 |                                          |
| floR      | 18B | 36.85 | 83.5  | 1.86 | MultipleMeltPeaks                        |
| folA      | 18B |       |       |      | NoAmplification                          |
| fosB      | 18B |       |       |      | LowEfficiency, CtIsSmall, S <sub>e</sub> |
| fosX      | 18B |       |       |      | LowEfficiency, CtIsSmall, S <sub>e</sub> |
| fox5      | 18B | 26.79 | 86.49 | 2    |                                          |
| imiR      | 18B |       |       |      | CurveFitFailed                           |
| ImrA-01   | 18B | 32.8  | 83.9  | 1.98 |                                          |
| intl      | 18B | 28.72 | 85.01 | 1.98 |                                          |
| intl1     | 18B | 19.25 | 87.24 | 2.05 |                                          |
| IS613     | 18B | 33.96 | 83.18 | 2.02 |                                          |
| lnuA-01   | 18B |       |       |      | CurveFitFailed                           |
| lnuB-01   | 18B |       |       |      | LowEfficiency, CtIsSmall, Ct             |
| lnuB-02   | 18B |       |       |      | LowEfficiency, CtIsSmall, Ct             |
| lnuC      | 18B | 33.42 | 87.25 | 1.77 | MultipleMeltPeaks                        |
| marR-01   | 18B | 32.92 | 85.07 | 1.95 |                                          |
| matA/mel  | 18B | 22.81 | 77.59 | 2.04 |                                          |
| mdet1     | 18B |       |       |      | LowEfficiency, CtIsSmall, Ct             |
| mdtA      | 18B | 32.41 | 82.05 | 1.87 |                                          |
| mdtE/yhiU | 18B |       |       |      | LowEfficiency, CtIsSmall, S <sub>e</sub> |
| mecA      | 18B |       |       |      | LowEfficiency, CtIsSmall, Ct             |
| mefA      | 18B | 22.12 | 80.37 | 1.97 | MultipleMeltPeaks                        |
| mepA      | 18B | 33.59 | 84.87 | 2    | MultipleMeltPeaks                        |
| mexA      | 18B |       |       |      | CurveFitFailed                           |
| mexD      | 18B | 31.31 | 80.36 | 2.02 |                                          |
| mexE      | 18B | 35.98 | 80.71 | 1.84 |                                          |
| mexF      | 18B | 27.4  | 83.89 | 2.07 |                                          |
| mphA-01   | 18B | 28.51 | 86.75 | 2    |                                          |
| mphA-02   | 18B | 27.63 | 89.32 | 1.63 | MultipleMeltPeaks                        |
| mphB      | 18B | 33.59 | 76.11 | 2.11 |                                          |
| mphC      | 18B |       |       |      | CurveFitFailed                           |
| msrA-01   | 18B | 36.42 | 83.27 | 1.89 |                                          |
| msrC-01   | 18B |       |       |      | NoAmplification                          |
| mtrC-01   | 18B |       |       |      | BadR2, LowEfficiency, CtIsS              |
| mtrC-02   | 18B | 31.73 | 84.06 | 1.97 |                                          |
| mtrD-02   | 18B | 26.84 | 84.3  | 1.97 |                                          |
| mtrD-03   | 18B | 34.9  | 84.2  | 1.86 | MultipleMeltPeaks                        |
| NDM1      | 18B |       |       |      | LowEfficiency, CtIsSmall, Ct             |
| nimE      | 18B | 37.56 | 77.63 | 1.94 |                                          |
| nisB      | 18B | 32.75 | 75.33 | 2    | MultipleMeltPeaks                        |

|                |     |       |       |      |                              |
|----------------|-----|-------|-------|------|------------------------------|
| oleC           | 18B | 34.31 | 76.63 | 1.92 |                              |
| oprD           | 18B | 27.23 | 86.77 | 2.01 |                              |
| oprJ           | 18B | 36.28 | 84.8  | 1.9  |                              |
| pbp            | 18B | 36.77 | 81.55 | 1.83 |                              |
| pbp2x          | 18B |       |       |      | LowEfficiency, CtIsSmall, Ct |
| Pbp5           | 18B |       |       |      | LowEfficiency, CtIsSmall, Se |
| penA           | 18B | 35.06 | 87.47 | 1.8  |                              |
| pikR1          | 18B |       |       |      | LowEfficiency, CtIsSmall, Se |
| pikR2          | 18B | 29.56 | 84.64 | 2.02 |                              |
| pmrA           | 18B | 24.07 | 79.68 | 2.07 |                              |
| pncA           | 18B | 32.8  | 83.94 | 1.96 |                              |
| putative multi | 18B | 29.96 | 84.01 | 2.02 |                              |
| qac            | 18B | 36.07 | 78.71 | 1.9  |                              |
| qacA           | 18B |       |       |      | CurveFitFailed               |
| qacA/qacB      | 18B |       |       |      | LowEfficiency, CtIsSmall, Ct |
| qacEdelta1-0   | 18B |       |       |      | LowEfficiency, CtIsSmall, Ct |
| qacEdelta1-0   | 18B | 29.47 | 76.85 | 1.94 |                              |
| qacH-01        | 18B | 31.19 | 86.34 | 2    |                              |
| qacH-02        | 18B | 33.07 | 83.76 | 1.7  |                              |
| qnrA           | 18B | 37.51 | 79.91 | 1.87 | MultipleMeltPeaks            |
| rarD-02        | 18B | 40.21 | 80.91 | 1.74 | MultipleMeltPeaks            |
| sat4           | 18B |       |       |      | LowEfficiency, CtIsSmall, Ct |
| sdeB           | 18B |       |       |      | CurveFitFailed               |
| spcN-01        | 18B |       |       |      | LowEfficiency, CtIsSmall, Ct |
| speA           | 18B |       |       |      | NoAmplification              |
| str            | 18B |       |       |      | LowEfficiency, CtIsSmall, Ct |
| strA           | 18B |       |       |      | CurveFitFailed               |
| strB           | 18B |       |       |      | LowEfficiency, CtIsSmall, Ct |
| sul1           | 18B | 32.39 | 89.21 | 1.98 |                              |
| sul2           | 18B |       |       |      | CurveFitFailed               |
| sulA/foIP-01   | 18B | 23.09 | 81.26 | 2.01 |                              |
| sulA/foIP-03   | 18B | 25.04 | 82.65 | 2    |                              |
| tet(32)        | 18B |       |       |      | LowEfficiency, CtIsSmall, Se |
| tet(34)        | 18B | 29.29 | 76.08 | 2.01 |                              |
| tet(35)        | 18B | 35.95 | 76.08 | 1.95 |                              |
| tet(36)-A      | 18B | 37.95 | 81.93 | 1.73 |                              |
| tet(36)-B      | 18B | 33.81 | 78.52 | 1.98 |                              |
| tet(37)        | 18B | 27.23 | 82.68 | 1.99 | MultipleMeltPeaks            |
| tetA-01        | 18B | 29.17 | 85.19 | 1.93 |                              |
| tetA-02        | 18B | 38.79 | 76.47 | 1.76 | MultipleMeltPeaks            |
| tetB-01        | 18B | 29.86 | 86.18 | 2.01 | MultipleMeltPeaks            |
| tetB-02        | 18B | 37.67 | 74.25 | 1.75 |                              |
| tetC-01        | 18B |       |       |      | NoAmplification              |
| tetC-02        | 18B | 37.37 | 80.91 | 1.84 |                              |
| tetD-01        | 18B |       |       |      | LowEfficiency, CtIsSmall, Ct |
| tetD-02        | 18B | 40.35 | 85.31 | 1.66 | MultipleMeltPeaks            |

|             |     |       |       |      |                                          |
|-------------|-----|-------|-------|------|------------------------------------------|
| tetE        | 18B |       |       |      | LowEfficiency, CtIsSmall, Ct             |
| tetG-01     | 18B | 34.08 | 82    | 1.99 | MultipleMeltPeaks                        |
| tetG-02     | 18B | 31.58 | 86.28 | 1.96 |                                          |
| tetH        | 18B |       |       |      | LowEfficiency, CtIsSmall, Ct             |
| tetJ        | 18B |       |       |      | CurveFitFailed                           |
| tetK        | 18B |       |       |      | CurveFitFailed                           |
| tetL-01     | 18B |       |       |      | LowEfficiency, CtIsSmall, S <sub>e</sub> |
| tetL-02     | 18B | 31.12 | 85.28 | 1.82 |                                          |
| tetM-01     | 18B | 23.65 | 76.27 | 1.98 |                                          |
| tetM-02     | 18B | 23.39 | 77.76 | 2.05 |                                          |
| tetO-01     | 18B |       |       |      | CurveFitFailed                           |
| tetPA       | 18B |       |       |      | LowEfficiency, CtIsSmall, Ct             |
| tetPB-01    | 18B | 36    | 79.76 | 1.86 | MultipleMeltPeaks                        |
| tetPB-02    | 18B | 27.95 | 84.76 | 2.16 |                                          |
| tetPB-03    | 18B |       |       |      | LowEfficiency, CtIsSmall, S <sub>e</sub> |
| tetPB-05    | 18B |       |       |      | LowEfficiency, CtIsSmall, S <sub>e</sub> |
| tetQ        | 18B |       |       |      | LowEfficiency, CtIsSmall, S <sub>e</sub> |
| tetR-02     | 18B | 30.53 | 87.83 | 1.95 | MultipleMeltPeaks                        |
| tetR-03     | 18B |       |       |      | LowEfficiency, CtIsSmall, S <sub>e</sub> |
| tetS        | 18B | 33.42 | 85.38 | 2.13 |                                          |
| tetT        | 18B |       |       |      | CurveFitFailed                           |
| tetU-01     | 18B |       |       |      | LowEfficiency, CtIsSmall, S <sub>e</sub> |
| tetV        | 18B |       |       |      | LowEfficiency, CtIsSmall, S <sub>e</sub> |
| tetW-01     | 18B | 25.83 | 81.63 | 1.99 |                                          |
| tetX        | 18B |       |       |      | LowEfficiency, CtIsSmall, Ct             |
| tnpA-01     | 18B | 34.21 | 79.34 | 1.98 | MultipleMeltPeaks                        |
| tnpA-02     | 18B | 34.85 | 85.49 | 1.76 |                                          |
| tnpA-03     | 18B | 36.74 | 73.72 | 2.06 |                                          |
| tnpA-04     | 18B |       |       |      | CurveFitFailed                           |
| tnpA-05     | 18B | 29.9  | 80.73 | 1.92 |                                          |
| tnpA-07     | 18B |       |       |      | LowEfficiency, CtIsSmall, Ct             |
| tolC-01     | 18B |       |       |      | CurveFitFailed                           |
| tolC-02     | 18B | 29.71 | 87.58 | 2.01 |                                          |
| tolC-03     | 18B | 29.77 | 85.59 | 1.96 |                                          |
| Tp614       | 18B | 32.27 | 72.93 | 2.03 | MultipleMeltPeaks                        |
| ttgA        | 18B | 36.62 | 76.74 | 1.85 | MultipleMeltPeaks                        |
| ttgB        | 18B | 33.79 | 83.58 | 2    |                                          |
| vanA        | 18B |       |       |      | NoAmplification                          |
| vanB-01     | 18B | 33.48 | 85.81 | 2.04 | MultipleMeltPeaks                        |
| vanC-01     | 18B |       |       |      | LowEfficiency, CtIsSmall, S <sub>e</sub> |
| vanC-02     | 18B |       |       |      | LowEfficiency, CtIsSmall, Ct             |
| vanC-03     | 18B | 25.07 | 85.75 | 1.96 | MultipleMeltPeaks                        |
| vanC1       | 18B |       |       |      | LowEfficiency, CtIsSmall, Ct             |
| vanC2/vanC3 | 18B | 31.99 | 84.64 | 2.05 | MultipleMeltPeaks                        |
| vanG        | 18B |       |       |      | LowEfficiency, CtIsSmall, Ct             |
| vanHB       | 18B | 38.5  | 78.68 | 1.81 |                                          |



|                |     |       |       |      |                                          |
|----------------|-----|-------|-------|------|------------------------------------------|
| vanHD          | 18B | 36.05 | 82.8  | 1.84 |                                          |
| vanRA-01       | 18B |       |       |      | LowEfficiency, CtIsSmall, Ct             |
| vanRA-02       | 18B |       |       |      | CurveFitFailed                           |
| vanRB          | 18B | 33.02 | 87.56 | 2.03 |                                          |
| vanRC          | 18B |       |       |      | LowEfficiency, CtIsSmall, Ct             |
| vanRC4         | 18B |       |       |      | CurveFitFailed                           |
| vanRD          | 18B |       |       |      | LowEfficiency, CtIsSmall, Ct             |
| vanSA          | 18B |       |       |      | LowEfficiency, CtIsSmall, S <sub>e</sub> |
| vanSB          | 18B |       |       |      | LowEfficiency, CtIsSmall, S <sub>e</sub> |
| vanSC-01       | 18B |       |       |      | LowEfficiency, CtIsSmall, S <sub>e</sub> |
| vanSC-02       | 18B |       |       |      | LowEfficiency, CtIsSmall, S <sub>e</sub> |
| vanTC-01       | 18B |       |       |      | CurveFitFailed                           |
| vanTC-02       | 18B |       |       |      | LowEfficiency, CtIsSmall, S <sub>e</sub> |
| vanTE          | 18B |       |       |      | LowEfficiency, CtIsSmall, S <sub>e</sub> |
| vanTG          | 18B |       |       |      | LowEfficiency, CtIsSmall, S <sub>e</sub> |
| vanWB          | 18B |       |       |      | BadR2, LowEfficiency, CtIsS              |
| vanWG          | 18B | 38.74 | 74.06 | 1.82 |                                          |
| vanXA          | 18B |       |       |      | LowEfficiency, CtIsSmall, S <sub>e</sub> |
| vanXB          | 18B |       |       |      | LowEfficiency, CtIsSmall, Ct             |
| vanXD          | 18B | 32.04 | 75.03 | 2.02 |                                          |
| vanYB          | 18B | 36.58 | 73.37 | 1.92 | MultipleMeltPeaks                        |
| vanYD-01       | 18B | 30.82 | 83.45 | 1.94 | MultipleMeltPeaks                        |
| vanYD-02       | 18B |       |       |      | LowEfficiency, CtIsSmall, S <sub>e</sub> |
| vatB-01        | 18B | 37.49 | 74.67 | 1.87 |                                          |
| vatB-02        | 18B | 34.67 | 75.72 | 2.01 | MultipleMeltPeaks                        |
| vatC-01        | 18B |       |       |      | CurveFitFailed                           |
| vatC-02        | 18B | 33.39 | 86.5  | 1.92 |                                          |
| vatE-01        | 18B | 30.3  | 76.68 | 2.15 |                                          |
| vatE-02        | 18B | 33.77 | 76.52 | 2.03 |                                          |
| vgaA-01        | 18B |       |       |      | CurveFitFailed                           |
| vgaA-02        | 18B |       |       |      | CurveFitFailed                           |
| vgb-01         | 18B | 35.4  | 75.2  | 1.94 | MultipleMeltPeaks                        |
| vgbB-01        | 18B | 37.68 | 86.62 | 1.76 |                                          |
| vgbB-02        | 18B |       |       |      | LowEfficiency, CtIsSmall, Ct             |
| yceE/mdtG-0    | 18B | 38.11 | 77.69 | 1.88 | MultipleMeltPeaks                        |
| yceE/mdtG-0    | 18B | 35.73 | 81.29 | 1.88 |                                          |
| yceL/mdtH-0    | 18B | 32.4  | 85.96 | 1.97 |                                          |
| yceL/mdtH-0    | 18B |       |       |      | NoAmplification                          |
| yceL/mdtH-0    | 18B | 36.36 | 84.92 | 1.82 |                                          |
| yidY/mdtL-01   | 18B | 33.61 | 83.95 | 1.86 |                                          |
| yidY/mdtL-02   | 18B |       |       |      | LowEfficiency, CtIsSmall, S <sub>e</sub> |
| 16S rRNA       | 18C | 14.48 | 82.13 | 1.92 |                                          |
| aac            | 18C |       |       |      | NoAmplification                          |
| aac(6')-Ib(akε | 18C | 31.8  | 81.7  | 1.69 |                                          |
| aac(6')-Ib(akε | 18C | 34.81 | 81.88 | 1.98 | MultipleMeltPeaks                        |
| aac(6')-Ib(akε | 18C | 34.32 | 90.07 | 1.87 | SaturationBaselineRatiolsL               |

|                            |     |       |       |      |                            |
|----------------------------|-----|-------|-------|------|----------------------------|
| aac(6')-II                 | 18C |       |       |      | NoAmplification            |
| aac(6')I1                  | 18C |       |       |      | NoAmplification            |
| aacA/aphD                  | 18C |       |       |      | NoAmplification            |
| aacC                       | 18C | 33.35 | 84.96 | 1.68 | MultipleMeltPeaks          |
| aacC1                      | 18C |       |       |      | NoAmplification            |
| aacC2                      | 18C |       |       |      | NoAmplification            |
| aacC4                      | 18C |       |       |      | NoAmplification            |
| aadA-01                    | 18C |       |       |      | NoAmplification            |
| aadA-02                    | 18C |       |       |      | NoAmplification            |
| aadA-1-01                  | 18C |       |       |      | NoAmplification            |
| aadA-1-02                  | 18C |       |       |      | NoAmplification            |
| aadA1                      | 18C |       |       |      | NoAmplification            |
| aadA2-01                   | 18C |       |       |      | NoAmplification            |
| aadA2-02                   | 18C |       |       |      | NoAmplification            |
| aadA2-03                   | 18C |       |       |      | NoAmplification            |
| aadA5-01                   | 18C |       |       |      | NoAmplification            |
| aadA5-02                   | 18C | 34.05 | 88.18 | 1.69 |                            |
| aadA9-01                   | 18C |       |       |      | NoAmplification            |
| aadA9-02                   | 18C |       |       |      | NoAmplification            |
| aadD                       | 18C |       |       |      | NoAmplification            |
| aadE                       | 18C |       |       |      | NoAmplification            |
| acrA-01                    | 18C | 32.16 | 88.71 | 1.72 |                            |
| acrA-02                    | 18C |       |       |      | NoAmplification            |
| acrA-03                    | 18C |       |       |      | NoAmplification            |
| acrA-04                    | 18C |       |       |      | NoAmplification            |
| acrA-05                    | 18C | 33.39 | 88.64 | 1.96 |                            |
| acrB-01                    | 18C |       |       |      | NoAmplification            |
| acrF                       | 18C | 32.6  | 82.98 | 1.58 | SaturationBaselineRatiolsL |
| acrR-01                    | 18C | 35.88 | 80.87 | 1.94 | MultipleMeltPeaks          |
| acrR-02                    | 18C | 36.6  | 85.15 | 1.72 | MultipleMeltPeaks          |
| Actin                      | 18C | 18.31 | 86.84 | 1.79 |                            |
| adeA                       | 18C |       |       |      | NoAmplification            |
| ampC-01                    | 18C |       |       |      | NoAmplification            |
| ampC-02                    | 18C |       |       |      | NoAmplification            |
| ampC-04                    | 18C |       |       |      | NoAmplification            |
| ampC-05                    | 18C |       |       |      | NoAmplification            |
| ampC-06                    | 18C |       |       |      | NoAmplification            |
| ampC-07                    | 18C |       |       |      | NoAmplification            |
| ampC-09                    | 18C |       |       |      | NoAmplification            |
| ampC/blaDH                 | 18C | 32.77 | 87.03 | 1.76 | MultipleMeltPeaks          |
| aph                        | 18C |       |       |      | NoAmplification            |
| aph(2')-Id-01              | 18C |       |       |      | NoAmplification            |
| aph(2')-Id-02              | 18C |       |       |      | NoAmplification            |
| aph6ia                     | 18C |       |       |      | NoAmplification            |
| aphA1(aka k <sub>z</sub> ) | 18C |       |       |      | NoAmplification            |
| bacA-01                    | 18C |       |       |      | NoAmplification            |

|              |     |       |       |      |                           |
|--------------|-----|-------|-------|------|---------------------------|
| bacA-02      | 18C |       |       |      | NoAmplification           |
| BETA-globin  | 18C | 19.05 | 84.08 | 1.92 |                           |
| bla-ACC-1    | 18C |       |       |      | NoAmplification           |
| bla-L1       | 18C | 32.67 | 84.95 | 1.99 |                           |
| bla1         | 18C |       |       |      | NoAmplification           |
| blaCMY       | 18C |       |       |      | NoAmplification           |
| blaCMY2-01   | 18C |       |       |      | NoAmplification           |
| blaCMY2-02   | 18C | 31.26 | 85.09 | 1.66 | MultipleMeltPeaks         |
| blaCTX-M-01  | 18C |       |       |      | NoAmplification           |
| blaCTX-M-02  | 18C |       |       |      | NoAmplification           |
| blaCTX-M-03  | 18C |       |       |      | NoAmplification           |
| blaCTX-M-04  | 18C |       |       |      | NoAmplification           |
| blaCTX-M-05  | 18C |       |       |      | NoAmplification           |
| blaCTX-M-06  | 18C |       |       |      | NoAmplification           |
| blaGES       | 18C |       |       |      | NoAmplification           |
| blaIMP-01    | 18C |       |       |      | NoAmplification           |
| blaIMP-02    | 18C |       |       |      | NoAmplification           |
| blaMOX/blaC  | 18C |       |       |      | NoAmplification           |
| blaOCH       | 18C |       |       |      | NoAmplification           |
| blaOKP       | 18C |       |       |      | NoAmplification           |
| blaOXA1/blaC | 18C |       |       |      | NoAmplification           |
| blaOXA10-01  | 18C |       |       |      | NoAmplification           |
| blaOXA10-02  | 18C |       |       |      | NoAmplification           |
| blaOXY       | 18C |       |       |      | NoAmplification           |
| blaPAO       | 18C |       |       |      | NoAmplification           |
| blaPER       | 18C |       |       |      | NoAmplification           |
| blaPSE       | 18C |       |       |      | NoAmplification           |
| blaROB       | 18C |       |       |      | NoAmplification           |
| blaSFO       | 18C | 34.03 | 89.65 | 1.67 |                           |
| blaSHV-01    | 18C |       |       |      | NoAmplification           |
| blaSHV-02    | 18C |       |       |      | NoAmplification           |
| blaTEM       | 18C |       |       |      | NoAmplification           |
| blaTLA       | 18C |       |       |      | NoAmplification           |
| blaVEB       | 18C |       |       |      | NoAmplification           |
| blaVIM       | 18C |       |       |      | NoAmplification           |
| blaZ         | 18C |       |       |      | NoAmplification           |
| carB         | 18C |       |       |      | NoAmplification           |
| catA1        | 18C |       |       |      | NoAmplification           |
| catB3        | 18C | 34.6  | 87.46 | 1.97 | SaturationBaselineRatiosL |
| catB8        | 18C | 32.62 | 82.87 | 1.78 |                           |
| ceoA         | 18C | 33.82 | 82.06 | 1.92 | MultipleMeltPeaks         |
| cepA         | 18C |       |       |      | NoAmplification           |
| cfiA         | 18C | 31.18 | 86.19 | 1.71 |                           |
| cfr          | 18C |       |       |      | NoAmplification           |
| cfxA         | 18C | 21.94 | 77.09 | 1.63 |                           |
| cmeA         | 18C |       |       |      | NoAmplification           |

|            |     |       |       |      |                            |
|------------|-----|-------|-------|------|----------------------------|
| cmlA1-01   | 18C |       |       |      | NoAmplification            |
| cmlA1-02   | 18C |       |       |      | NoAmplification            |
| cmr        | 18C |       |       |      | NoAmplification            |
| cmx(A)     | 18C | 29.85 | 85.58 | 1.71 |                            |
| cphA-01    | 18C |       |       |      | NoAmplification            |
| cphA-02    | 18C |       |       |      | NoAmplification            |
| dfrA1      | 18C |       |       |      | NoAmplification            |
| dfrA12     | 18C |       |       |      | NoAmplification            |
| emrD       | 18C |       |       |      | NoAmplification            |
| ereA       | 18C |       |       |      | NoAmplification            |
| ereB       | 18C |       |       |      | CurveFitFailed             |
| erm(34)    | 18C |       |       |      | NoAmplification            |
| erm(35)    | 18C |       |       |      | NoAmplification            |
| erm(36)    | 18C |       |       |      | NoAmplification            |
| ermA       | 18C |       |       |      | NoAmplification            |
| ermA/ermTR | 18C |       |       |      | NoAmplification            |
| ermB       | 18C |       |       |      | NoAmplification            |
| ermC       | 18C |       |       |      | NoAmplification            |
| ermF       | 18C |       |       |      | NoAmplification            |
| ermJ/ermD  | 18C |       |       |      | NoAmplification            |
| ermK-01    | 18C |       |       |      | NoAmplification            |
| ermK-02    | 18C |       |       |      | NoAmplification            |
| ermT-01    | 18C |       |       |      | NoAmplification            |
| ermT-02    | 18C |       |       |      | NoAmplification            |
| ermX       | 18C | 30.33 | 82.83 | 1.67 | SaturationBaselineRatiolsL |
| ermY       | 18C |       |       |      | NoAmplification            |
| fabK       | 18C |       |       |      | NoAmplification            |
| floR       | 18C |       |       |      | NoAmplification            |
| folA       | 18C |       |       |      | NoAmplification            |
| fosB       | 18C |       |       |      | NoAmplification            |
| fosX       | 18C |       |       |      | NoAmplification            |
| fox5       | 18C | 31.05 | 87.28 | 1.46 | MultipleMeltPeaks          |
| imiR       | 18C |       |       |      | NoAmplification            |
| ImrA-01    | 18C |       |       |      | NoAmplification            |
| intl       | 18C | 32.07 | 88.85 | 1.68 |                            |
| intl1      | 18C | 21.93 | 87.26 | 2.15 |                            |
| IS613      | 18C |       |       |      | NoAmplification            |
| lnuA-01    | 18C |       |       |      | NoAmplification            |
| lnuB-01    | 18C |       |       |      | NoAmplification            |
| lnuB-02    | 18C |       |       |      | NoAmplification            |
| lnuC       | 18C | 32.08 | 87.41 | 1.73 |                            |
| marR-01    | 18C |       |       |      | NoAmplification            |
| matA/mel   | 18C | 20.25 | 77.2  | 1.94 |                            |
| mdet11     | 18C |       |       |      | NoAmplification            |
| mdtA       | 18C |       |       |      | NoAmplification            |
| mdtE/yhiU  | 18C | 31.16 | 80.49 | 1.73 |                            |

|                |     |       |       |      |                            |
|----------------|-----|-------|-------|------|----------------------------|
| mecA           | 18C | 30.8  | 73.91 | 1.55 | MultipleMeltPeaks          |
| mefA           | 18C | 19.8  | 80.31 | 1.9  |                            |
| mepA           | 18C |       |       |      | NoAmplification            |
| mexA           | 18C |       |       |      | NoAmplification            |
| mexD           | 18C |       |       |      | NoAmplification            |
| mexE           | 18C |       |       |      | NoAmplification            |
| mexF           | 18C |       |       |      | NoAmplification            |
| mphA-01        | 18C | 31.07 | 89.14 | 1.59 | MultipleMeltPeaks          |
| mphA-02        | 18C |       |       |      | NoAmplification            |
| mphB           | 18C |       |       |      | NoAmplification            |
| mphC           | 18C |       |       |      | NoAmplification            |
| msrA-01        | 18C |       |       |      | NoAmplification            |
| msrC-01        | 18C |       |       |      | NoAmplification            |
| mtrC-01        | 18C |       |       |      | NoAmplification            |
| mtrC-02        | 18C |       |       |      | NoAmplification            |
| mtrD-02        | 18C | 29.82 | 81.15 | 1.9  |                            |
| mtrD-03        | 18C |       |       |      | NoAmplification            |
| NDM1           | 18C |       |       |      | NoAmplification            |
| nimE           | 18C |       |       |      | NoAmplification            |
| nisB           | 18C |       |       |      | NoAmplification            |
| oleC           | 18C |       |       |      | NoAmplification            |
| oprD           | 18C | 30.6  | 86.74 | 1.77 |                            |
| oprJ           | 18C |       |       |      | NoAmplification            |
| pbp            | 18C |       |       |      | NoAmplification            |
| pbp2x          | 18C |       |       |      | NoAmplification            |
| Pbp5           | 18C |       |       |      | NoAmplification            |
| penA           | 18C |       |       |      | NoAmplification            |
| pikR1          | 18C |       |       |      | NoAmplification            |
| pikR2          | 18C |       |       |      | NoAmplification            |
| pmrA           | 18C | 24.02 | 79.27 | 1.7  |                            |
| pncA           | 18C | 35    | 87.1  | 1.87 | SaturationBaselineRatiolsL |
| putative multi | 18C |       |       |      | NoAmplification            |
| qac            | 18C |       |       |      | NoAmplification            |
| qacA           | 18C |       |       |      | NoAmplification            |
| qacA/qacB      | 18C |       |       |      | NoAmplification            |
| qacEdelta1-0   | 18C |       |       |      | NoAmplification            |
| qacEdelta1-0   | 18C | 33.61 | 79.93 | 1.79 | MultipleMeltPeaks          |
| qacH-01        | 18C |       |       |      | NoAmplification            |
| qacH-02        | 18C |       |       |      | NoAmplification            |
| qnrA           | 18C | 34.52 | 72.9  | 1.91 | MultipleMeltPeaks          |
| rarD-02        | 18C |       |       |      | NoAmplification            |
| sat4           | 18C |       |       |      | NoAmplification            |
| sdeB           | 18C |       |       |      | NoAmplification            |
| spcN-01        | 18C |       |       |      | NoAmplification            |
| speA           | 18C |       |       |      | NoAmplification            |
| str            | 18C |       |       |      | NoAmplification            |

|              |     |       |       |      |                   |
|--------------|-----|-------|-------|------|-------------------|
| strA         | 18C |       |       |      | NoAmplification   |
| strB         | 18C | 31.64 | 83.58 | 1.79 |                   |
| sul1         | 18C |       |       |      | NoAmplification   |
| sul2         | 18C |       |       |      | NoAmplification   |
| sulA/folP-01 | 18C | 20.59 | 81.12 | 1.84 |                   |
| sulA/folP-03 | 18C | 24.69 | 82.44 | 1.85 |                   |
| tet(32)      | 18C |       |       |      | NoAmplification   |
| tet(34)      | 18C | 34.18 | 74.84 | 1.79 | MultipleMeltPeaks |
| tet(35)      | 18C |       |       |      | NoAmplification   |
| tet(36)-A    | 18C |       |       |      | NoAmplification   |
| tet(36)-B    | 18C |       |       |      | NoAmplification   |
| tet(37)      | 18C | 34.06 | 87.37 | 1.86 |                   |
| tetA-01      | 18C |       |       |      | NoAmplification   |
| tetA-02      | 18C |       |       |      | NoAmplification   |
| tetB-01      | 18C | 34.87 | 87.48 | 1.82 |                   |
| tetB-02      | 18C |       |       |      | NoAmplification   |
| tetC-01      | 18C |       |       |      | NoAmplification   |
| tetC-02      | 18C |       |       |      | NoAmplification   |
| tetD-01      | 18C |       |       |      | NoAmplification   |
| tetD-02      | 18C |       |       |      | NoAmplification   |
| tetE         | 18C |       |       |      | NoAmplification   |
| tetG-01      | 18C |       |       |      | NoAmplification   |
| tetG-02      | 18C |       |       |      | NoAmplification   |
| tetH         | 18C |       |       |      | NoAmplification   |
| tetJ         | 18C |       |       |      | NoAmplification   |
| tetK         | 18C |       |       |      | NoAmplification   |
| tetL-01      | 18C |       |       |      | NoAmplification   |
| tetL-02      | 18C |       |       |      | NoAmplification   |
| tetM-01      | 18C | 21.02 | 75.59 | 1.83 | MultipleMeltPeaks |
| tetM-02      | 18C | 20.92 | 77.32 | 1.95 |                   |
| tetO-01      | 18C |       |       |      | NoAmplification   |
| tetPA        | 18C |       |       |      | NoAmplification   |
| tetPB-01     | 18C |       |       |      | NoAmplification   |
| tetPB-02     | 18C |       |       |      | NoAmplification   |
| tetPB-03     | 18C |       |       |      | NoAmplification   |
| tetPB-05     | 18C |       |       |      | NoAmplification   |
| tetQ         | 18C |       |       |      | NoAmplification   |
| tetR-02      | 18C | 33.07 | 87.32 | 1.65 |                   |
| tetR-03      | 18C |       |       |      | NoAmplification   |
| tetS         | 18C |       |       |      | NoAmplification   |
| tetT         | 18C |       |       |      | NoAmplification   |
| tetU-01      | 18C |       |       |      | NoAmplification   |
| tetV         | 18C |       |       |      | NoAmplification   |
| tetW-01      | 18C | 24.42 | 81.49 | 1.87 |                   |
| tetX         | 18C |       |       |      | NoAmplification   |
| tnpA-01      | 18C | 32.55 | 74.65 | 1.79 | MultipleMeltPeaks |

|             |     |       |       |      |                           |
|-------------|-----|-------|-------|------|---------------------------|
| tnpA-02     | 18C |       |       |      | NoAmplification           |
| tnpA-03     | 18C | 31.29 | 77.23 | 1.61 |                           |
| tnpA-04     | 18C | 31.31 | 82.03 | 1.7  |                           |
| tnpA-05     | 18C | 31.43 | 80.39 | 1.73 |                           |
| tnpA-07     | 18C |       |       |      | NoAmplification           |
| tolC-01     | 18C |       |       |      | NoAmplification           |
| tolC-02     | 18C | 32.77 | 83.5  | 1.74 | MultipleMeltPeaks         |
| tolC-03     | 18C | 33.6  | 87.4  | 1.74 |                           |
| Tp614       | 18C | 32.95 | 83.09 | 1.73 |                           |
| ttgA        | 18C |       |       |      | NoAmplification           |
| ttgB        | 18C |       |       |      | NoAmplification           |
| vanA        | 18C |       |       |      | NoAmplification           |
| vanB-01     | 18C |       |       |      | NoAmplification           |
| vanC-01     | 18C |       |       |      | NoAmplification           |
| vanC-02     | 18C |       |       |      | NoAmplification           |
| vanC-03     | 18C | 27.7  | 85.11 | 1.88 | MultipleMeltPeaks         |
| vanC1       | 18C |       |       |      | NoAmplification           |
| vanC2/vanC3 | 18C | 32.75 | 84.83 | 1.55 | SaturationBaselineRatiosL |
| vanG        | 18C |       |       |      | NoAmplification           |
| vanHB       | 18C |       |       |      | NoAmplification           |
| vanHD       | 18C |       |       |      | NoAmplification           |
| vanRA-01    | 18C |       |       |      | NoAmplification           |
| vanRA-02    | 18C |       |       |      | NoAmplification           |
| vanRB       | 18C |       |       |      | NoAmplification           |
| vanRC       | 18C |       |       |      | NoAmplification           |
| vanRC4      | 18C |       |       |      | NoAmplification           |
| vanRD       | 18C |       |       |      | NoAmplification           |
| vanSA       | 18C |       |       |      | NoAmplification           |
| vanSB       | 18C |       |       |      | NoAmplification           |
| vanSC-01    | 18C |       |       |      | NoAmplification           |
| vanSC-02    | 18C |       |       |      | NoAmplification           |
| vanTC-01    | 18C |       |       |      | NoAmplification           |
| vanTC-02    | 18C |       |       |      | NoAmplification           |
| vanTE       | 18C |       |       |      | NoAmplification           |
| vanTG       | 18C |       |       |      | NoAmplification           |
| vanWB       | 18C |       |       |      | NoAmplification           |
| vanWG       | 18C | 35.08 | 74.27 | 2.03 | SaturationBaselineRatiosL |
| vanXA       | 18C |       |       |      | NoAmplification           |
| vanXB       | 18C |       |       |      | NoAmplification           |
| vanXD       | 18C |       |       |      | NoAmplification           |
| vanYB       | 18C |       |       |      | CurveFitFailed            |
| vanYD-01    | 18C | 32.21 | 85.27 | 1.71 |                           |
| vanYD-02    | 18C |       |       |      | NoAmplification           |
| vatB-01     | 18C |       |       |      | NoAmplification           |
| vatB-02     | 18C |       |       |      | NoAmplification           |
| vatC-01     | 18C |       |       |      | NoAmplification           |

|              |     |       |       |      |                   |
|--------------|-----|-------|-------|------|-------------------|
| vatC-02      | 18C |       |       |      | CurveFitFailed    |
| vatE-01      | 18C |       |       |      | NoAmplification   |
| vatE-02      | 18C |       |       |      | NoAmplification   |
| vgaA-01      | 18C |       |       |      | NoAmplification   |
| vgaA-02      | 18C |       |       |      | NoAmplification   |
| vgb-01       | 18C |       |       |      | NoAmplification   |
| vgbB-01      | 18C |       |       |      | NoAmplification   |
| vgbB-02      | 18C |       |       |      | NoAmplification   |
| yceE/mdtG-0  | 18C |       |       |      | NoAmplification   |
| yceE/mdtG-0  | 18C |       |       |      | NoAmplification   |
| yceL/mdtH-0  | 18C |       |       |      | CurveFitFailed    |
| yceL/mdtH-0  | 18C |       |       |      | NoAmplification   |
| yceL/mdtH-0  | 18C | 34.96 | 77.39 | 1.85 | MultipleMeltPeaks |
| yidY/mdtL-01 | 18C |       |       |      | NoAmplification   |
| yidY/mdtL-02 | 18C |       |       |      | NoAmplification   |



| Assay          | Sample | Ct | Tm    | Efficiency | flag                         |
|----------------|--------|----|-------|------------|------------------------------|
| 16S rRNA       | 18B    |    | 18.59 | 82.1       | 1.95                         |
| aac            | 18B    |    | 29.68 | 81.69      | 1.74 MultipleMeltPeaks       |
| aac(6')-Ib(akz | 18B    |    |       |            | LowEfficiency, CtIsSmall, Ci |
| aac(6')-Ib(akz | 18B    |    | 30.65 | 85.48      | 2.01 MultipleMeltPeaks       |
| aac(6')-Ib(akz | 18B    |    | 33.6  | 86.06      | 2.01 MultipleMeltPeaks       |
| aac(6')-II     | 18B    |    | 34.25 | 83.96      | 1.8 MultipleMeltPeaks        |
| aac(6')I1      | 18B    |    |       |            | LowEfficiency, CtIsSmall, Ci |
| aacA/aphD      | 18B    |    |       |            | CurveFitFailed               |
| aacC           | 18B    |    | 31.04 | 91.92      | 1.97 MultipleMeltPeaks       |
| aacC1          | 18B    |    | 35.15 | 83.94      | 1.91                         |
| aacC2          | 18B    |    |       |            | NoAmplification              |
| aacC4          | 18B    |    | 34.26 | 83.64      | 1.92 MultipleMeltPeaks       |
| aadA-01        | 18B    |    |       |            | LowEfficiency, CtIsSmall, S: |
| aadA-02        | 18B    |    | 34.93 | 80.4       | 1.94                         |
| aadA-1-01      | 18B    |    | 33.82 | 81.2       | 1.97 MultipleMeltPeaks       |
| aadA-1-02      | 18B    |    |       |            | LowEfficiency, CtIsSmall, Ci |
| aadA1          | 18B    |    | 34.32 | 83.77      | 1.99                         |
| aadA2-01       | 18B    |    |       |            | CurveFitFailed               |
| aadA2-02       | 18B    |    |       |            | NoAmplification              |
| aadA2-03       | 18B    |    |       |            | LowEfficiency, CtIsSmall, Ci |
| aadA5-01       | 18B    |    | 32.33 | 78.5       | 1.97                         |
| aadA5-02       | 18B    |    | 30.6  | 83.45      | 1.97 MultipleMeltPeaks       |
| aadA9-01       | 18B    |    | 34.94 | 80.32      | 1.9 MultipleMeltPeaks        |
| aadA9-02       | 18B    |    | 37.18 | 73.44      | 1.89                         |
| aadD           | 18B    |    |       |            | LowEfficiency, CtIsSmall, S: |
| aadE           | 18B    |    | 35.08 | 73.14      | 2.01                         |
| acrA-01        | 18B    |    | 31.47 | 88.74      | 2                            |
| acrA-02        | 18B    |    | 37.86 | 83.5       | 1.71 MultipleMeltPeaks       |
| acrA-03        | 18B    |    |       |            | CurveFitFailed               |
| acrA-04        | 18B    |    | 29.05 | 80.64      | 2.03                         |
| acrA-05        | 18B    |    | 29.45 | 88.63      | 1.93                         |
| acrB-01        | 18B    |    |       |            | NoAmplification              |
| acrF           | 18B    |    | 24.06 | 82.95      | 1.82                         |
| acrR-01        | 18B    |    | 31.5  | 80.87      | 1.94 MultipleMeltPeaks       |
| acrR-02        | 18B    |    | 32.51 | 86.89      | 2                            |
| Actin          | 18B    |    | 19.8  | 86.86      | 2                            |
| adeA           | 18B    |    |       |            | LowEfficiency, CtIsSmall, S: |
| ampC-01        | 18B    |    | 33.05 | 85.7       | 1.93                         |
| ampC-02        | 18B    |    |       |            | LowEfficiency, CtIsSmall, S: |
| ampC-04        | 18B    |    | 30.62 | 78.89      | 1.81 MultipleMeltPeaks       |
| ampC-05        | 18B    |    |       |            | LowEfficiency, CtIsSmall, Ci |
| ampC-06        | 18B    |    | 38    | 82.02      | 1.86 MultipleMeltPeaks       |
| ampC-07        | 18B    |    | 33.22 | 88.43      | 1.87                         |
| ampC-09        | 18B    |    |       |            | LowEfficiency, CtIsSmall, Ci |
| ampC/blaDH     | 18B    |    | 30.05 | 85.71      | 1.99                         |

|                          |     |       |       |      |                                          |
|--------------------------|-----|-------|-------|------|------------------------------------------|
| aph                      | 18B |       |       |      | CurveFitFailed                           |
| aph(2')-Id-01            | 18B |       |       |      | LowEfficiency, CtIsSmall, Ci             |
| aph(2')-Id-02            | 18B |       |       |      | LowEfficiency, CtIsSmall, Ci             |
| aph6ia                   | 18B | 32.27 | 78.07 | 1.96 |                                          |
| aphA1(aka k <sub>z</sub> | 18B | 35.32 | 77.54 | 1.92 | MultipleMeltPeaks                        |
| bacA-01                  | 18B | 33.28 | 77.4  | 2    | MultipleMeltPeaks                        |
| bacA-02                  | 18B | 31.98 | 86.76 | 1.86 |                                          |
| BETA-globin              | 18B | 20.46 | 84.07 | 1.99 |                                          |
| bla-ACC-1                | 18B | 34.09 | 89.71 | 1.91 | MultipleMeltPeaks                        |
| bla-L1                   | 18B | 30.11 | 84.32 | 1.96 |                                          |
| bla1                     | 18B |       |       |      | LowEfficiency, CtIsSmall, Ci             |
| blaCMY                   | 18B | 35.96 | 76.61 | 1.86 |                                          |
| blaCMY2-01               | 18B | 29.94 | 82.89 | 1.99 |                                          |
| blaCMY2-02               | 18B | 28.13 | 85.13 | 2    | MultipleMeltPeaks                        |
| blaCTX-M-01              | 18B |       |       |      | NoAmplification                          |
| blaCTX-M-02              | 18B | 31.96 | 83.59 | 1.93 |                                          |
| blaCTX-M-03              | 18B |       |       |      | LowEfficiency, CtIsSmall, Ci             |
| blaCTX-M-04              | 18B | 33.78 | 87.77 | 2.06 |                                          |
| blaCTX-M-05              | 18B | 31.22 | 76.83 | 1.81 |                                          |
| blaCTX-M-06              | 18B | 36.35 | 89.4  | 1.83 |                                          |
| blaGES                   | 18B |       |       |      | LowEfficiency, CtIsSmall, Ci             |
| blaIMP-01                | 18B |       |       |      | LowEfficiency, CtIsSmall, Ci             |
| blaIMP-02                | 18B | 36.84 | 74.68 | 1.88 |                                          |
| blaMOX/blaC              | 18B | 37.06 | 82.27 | 1.89 |                                          |
| blaOCH                   | 18B |       |       |      | NoAmplification                          |
| blaOKP                   | 18B |       |       |      | NoAmplification                          |
| blaOXA1/blaC             | 18B |       |       |      | CurveFitFailed                           |
| blaOXA10-01              | 18B |       |       |      | LowEfficiency, CtIsSmall, Ci             |
| blaOXA10-02              | 18B |       |       |      | LowEfficiency, CtIsSmall, S <sub>c</sub> |
| blaOXY                   | 18B | 34.35 | 79.3  | 1.9  |                                          |
| blaPAO                   | 18B |       |       |      | NoAmplification                          |
| blaPER                   | 18B | 35.6  | 79    | 1.94 |                                          |
| blaPSE                   | 18B |       |       |      | NoAmplification                          |
| blaROB                   | 18B |       |       |      | NoAmplification                          |
| blaSFO                   | 18B | 29.97 | 86.12 | 1.9  | MultipleMeltPeaks                        |
| blaSHV-01                | 18B | 32.04 | 73.68 | 2.02 | MultipleMeltPeaks                        |
| blaSHV-02                | 18B | 34.46 | 79.57 | 1.85 |                                          |
| blaTEM                   | 18B | 24.64 | 79.61 | 2.02 |                                          |
| blaTLA                   | 18B |       |       |      | LowEfficiency, CtIsSmall, Ci             |
| blaVEB                   | 18B |       |       |      | NoAmplification                          |
| blaVIM                   | 18B |       |       |      | NoAmplification                          |
| blaZ                     | 18B |       |       |      | LowEfficiency, CtIsSmall, Ci             |
| carB                     | 18B |       |       |      | CurveFitFailed                           |
| catA1                    | 18B |       |       |      | NoAmplification                          |
| catB3                    | 18B | 34.68 | 87.54 | 1.88 | MultipleMeltPeaks                        |
| catB8                    | 18B | 28.22 | 84.14 | 2.01 | MultipleMeltPeaks                        |

|            |     |       |       |      |                              |
|------------|-----|-------|-------|------|------------------------------|
| ceoA       | 18B | 28.33 | 82.09 | 1.94 | MultipleMeltPeaks            |
| cepA       | 18B |       |       |      | LowEfficiency, CtIsSmall, S: |
| cfiA       | 18B | 30.54 | 87.31 | 1.81 |                              |
| cfr        | 18B |       |       |      | LowEfficiency, CtIsSmall, Ci |
| cfxA       | 18B | 26.5  | 77.45 | 2.02 |                              |
| cmeA       | 18B | 34.94 | 84.99 | 1.86 |                              |
| cmlA1-01   | 18B |       |       |      | BadR2, LowEfficiency, CtIsS  |
| cmlA1-02   | 18B | 38.22 | 81.77 | 1.88 | MultipleMeltPeaks            |
| cmr        | 18B |       |       |      | CurveFitFailed               |
| cmx(A)     | 18B | 25.53 | 84.77 | 2    | MultipleMeltPeaks            |
| cphA-01    | 18B | 29.95 | 85.3  | 2    | MultipleMeltPeaks            |
| cphA-02    | 18B | 36.12 | 82.4  | 1.9  |                              |
| dfrA1      | 18B | 35.72 | 78.66 | 1.85 |                              |
| dfrA12     | 18B | 32.53 | 87.12 | 1.97 |                              |
| emrD       | 18B |       |       |      | CurveFitFailed               |
| ereA       | 18B | 36.79 | 74.16 | 1.93 |                              |
| ereB       | 18B | 34.29 | 85.59 | 2.06 | MultipleMeltPeaks            |
| erm(34)    | 18B |       |       |      | NoAmplification              |
| erm(35)    | 18B |       |       |      | LowEfficiency, CtIsSmall, Ci |
| erm(36)    | 18B | 34.43 | 87.66 | 1.92 |                              |
| ermA       | 18B |       |       |      | LowEfficiency, CtIsSmall, Ci |
| ermA/ermTR | 18B | 30.28 | 75.68 | 2    |                              |
| ermB       | 18B |       |       |      | LowEfficiency, CtIsSmall, Ci |
| ermC       | 18B | 35.2  | 82.66 | 2    |                              |
| ermF       | 18B |       |       |      | CurveFitFailed               |
| ermJ/ermD  | 18B |       |       |      | CurveFitFailed               |
| ermK-01    | 18B |       |       |      | CurveFitFailed               |
| ermK-02    | 18B | 36.13 | 87.48 | 1.71 | MultipleMeltPeaks            |
| ermT-01    | 18B |       |       |      | LowEfficiency, CtIsSmall, Ci |
| ermT-02    | 18B | 34.78 | 79.57 | 2.01 |                              |
| ermX       | 18B | 34.32 | 83.3  | 1.81 | MultipleMeltPeaks            |
| ermY       | 18B |       |       |      | LowEfficiency, CtIsSmall, Ci |
| fabK       | 18B | 29.09 | 79.29 | 1.76 |                              |
| floR       | 18B | 36.85 | 83.5  | 1.86 | MultipleMeltPeaks            |
| folA       | 18B |       |       |      | NoAmplification              |
| fosB       | 18B |       |       |      | LowEfficiency, CtIsSmall, S: |
| fosX       | 18B |       |       |      | LowEfficiency, CtIsSmall, S: |
| fox5       | 18B | 26.79 | 86.49 | 2    |                              |
| imiR       | 18B |       |       |      | CurveFitFailed               |
| ImrA-01    | 18B | 32.8  | 83.9  | 1.98 |                              |
| intl       | 18B | 28.72 | 85.01 | 1.98 |                              |
| intl1      | 18B | 19.25 | 87.24 | 2.05 |                              |
| IS613      | 18B | 33.96 | 83.18 | 2.02 |                              |
| lnuA-01    | 18B |       |       |      | CurveFitFailed               |
| lnuB-01    | 18B |       |       |      | LowEfficiency, CtIsSmall, Ci |
| lnuB-02    | 18B |       |       |      | LowEfficiency, CtIsSmall, Ci |

|                |     |       |       |      |                              |
|----------------|-----|-------|-------|------|------------------------------|
| lnuC           | 18B | 33.42 | 87.25 | 1.77 | MultipleMeltPeaks            |
| marR-01        | 18B | 32.92 | 85.07 | 1.95 |                              |
| matA/mel       | 18B | 22.81 | 77.59 | 2.04 |                              |
| mdet1          | 18B |       |       |      | LowEfficiency, CtIsSmall, Ci |
| mdtA           | 18B | 32.41 | 82.05 | 1.87 |                              |
| mdtE/yhiU      | 18B |       |       |      | LowEfficiency, CtIsSmall, S: |
| mecA           | 18B |       |       |      | LowEfficiency, CtIsSmall, Ci |
| mefA           | 18B | 22.12 | 80.37 | 1.97 | MultipleMeltPeaks            |
| mepA           | 18B | 33.59 | 84.87 | 2    | MultipleMeltPeaks            |
| mexA           | 18B |       |       |      | CurveFitFailed               |
| mexD           | 18B | 31.31 | 80.36 | 2.02 |                              |
| mexE           | 18B | 35.98 | 80.71 | 1.84 |                              |
| mexF           | 18B | 27.4  | 83.89 | 2.07 |                              |
| mphA-01        | 18B | 28.51 | 86.75 | 2    |                              |
| mphA-02        | 18B | 27.63 | 89.32 | 1.63 | MultipleMeltPeaks            |
| mphB           | 18B | 33.59 | 76.11 | 2.11 |                              |
| mphC           | 18B |       |       |      | CurveFitFailed               |
| msrA-01        | 18B | 36.42 | 83.27 | 1.89 |                              |
| msrC-01        | 18B |       |       |      | NoAmplification              |
| mtrC-01        | 18B |       |       |      | BadR2, LowEfficiency, CtIsS  |
| mtrC-02        | 18B | 31.73 | 84.06 | 1.97 |                              |
| mtrD-02        | 18B | 26.84 | 84.3  | 1.97 |                              |
| mtrD-03        | 18B | 34.9  | 84.2  | 1.86 | MultipleMeltPeaks            |
| NDM1           | 18B |       |       |      | LowEfficiency, CtIsSmall, Ci |
| nimE           | 18B | 37.56 | 77.63 | 1.94 |                              |
| nisB           | 18B | 32.75 | 75.33 | 2    | MultipleMeltPeaks            |
| oleC           | 18B | 34.31 | 76.63 | 1.92 |                              |
| oprD           | 18B | 27.23 | 86.77 | 2.01 |                              |
| oprJ           | 18B | 36.28 | 84.8  | 1.9  |                              |
| pbp            | 18B | 36.77 | 81.55 | 1.83 |                              |
| pbp2x          | 18B |       |       |      | LowEfficiency, CtIsSmall, Ci |
| Pbp5           | 18B |       |       |      | LowEfficiency, CtIsSmall, S: |
| penA           | 18B | 35.06 | 87.47 | 1.8  |                              |
| pikR1          | 18B |       |       |      | LowEfficiency, CtIsSmall, S: |
| pikR2          | 18B | 29.56 | 84.64 | 2.02 |                              |
| pmrA           | 18B | 24.07 | 79.68 | 2.07 |                              |
| pncA           | 18B | 32.8  | 83.94 | 1.96 |                              |
| putative multi | 18B | 29.96 | 84.01 | 2.02 |                              |
| qac            | 18B | 36.07 | 78.71 | 1.9  |                              |
| qacA           | 18B |       |       |      | CurveFitFailed               |
| qacA/qacB      | 18B |       |       |      | LowEfficiency, CtIsSmall, Ci |
| qacEdelta1-0   | 18B |       |       |      | LowEfficiency, CtIsSmall, Ci |
| qacEdelta1-0   | 18B | 29.47 | 76.85 | 1.94 |                              |
| qacH-01        | 18B | 31.19 | 86.34 | 2    |                              |
| qacH-02        | 18B | 33.07 | 83.76 | 1.7  |                              |
| qnrA           | 18B | 37.51 | 79.91 | 1.87 | MultipleMeltPeaks            |

|              |     |       |       |      |                              |
|--------------|-----|-------|-------|------|------------------------------|
| rarD-02      | 18B | 40.21 | 80.91 | 1.74 | MultipleMeltPeaks            |
| sat4         | 18B |       |       |      | LowEfficiency, CtIsSmall, Ci |
| sdeB         | 18B |       |       |      | CurveFitFailed               |
| spcN-01      | 18B |       |       |      | LowEfficiency, CtIsSmall, Ci |
| speA         | 18B |       |       |      | NoAmplification              |
| str          | 18B |       |       |      | LowEfficiency, CtIsSmall, Ci |
| strA         | 18B |       |       |      | CurveFitFailed               |
| strB         | 18B |       |       |      | LowEfficiency, CtIsSmall, Ci |
| sul1         | 18B | 32.39 | 89.21 | 1.98 |                              |
| sul2         | 18B |       |       |      | CurveFitFailed               |
| sulA/foIP-01 | 18B | 23.09 | 81.26 | 2.01 |                              |
| sulA/foIP-03 | 18B | 25.04 | 82.65 | 2    |                              |
| tet(32)      | 18B |       |       |      | LowEfficiency, CtIsSmall, S: |
| tet(34)      | 18B | 29.29 | 76.08 | 2.01 |                              |
| tet(35)      | 18B | 35.95 | 76.08 | 1.95 |                              |
| tet(36)-A    | 18B | 37.95 | 81.93 | 1.73 |                              |
| tet(36)-B    | 18B | 33.81 | 78.52 | 1.98 |                              |
| tet(37)      | 18B | 27.23 | 82.68 | 1.99 | MultipleMeltPeaks            |
| tetA-01      | 18B | 29.17 | 85.19 | 1.93 |                              |
| tetA-02      | 18B | 38.79 | 76.47 | 1.76 | MultipleMeltPeaks            |
| tetB-01      | 18B | 29.86 | 86.18 | 2.01 | MultipleMeltPeaks            |
| tetB-02      | 18B | 37.67 | 74.25 | 1.75 |                              |
| tetC-01      | 18B |       |       |      | NoAmplification              |
| tetC-02      | 18B | 37.37 | 80.91 | 1.84 |                              |
| tetD-01      | 18B |       |       |      | LowEfficiency, CtIsSmall, Ci |
| tetD-02      | 18B | 40.35 | 85.31 | 1.66 | MultipleMeltPeaks            |
| tetE         | 18B |       |       |      | LowEfficiency, CtIsSmall, Ci |
| tetG-01      | 18B | 34.08 | 82    | 1.99 | MultipleMeltPeaks            |
| tetG-02      | 18B | 31.58 | 86.28 | 1.96 |                              |
| tetH         | 18B |       |       |      | LowEfficiency, CtIsSmall, Ci |
| tetJ         | 18B |       |       |      | CurveFitFailed               |
| tetK         | 18B |       |       |      | CurveFitFailed               |
| tetL-01      | 18B |       |       |      | LowEfficiency, CtIsSmall, S: |
| tetL-02      | 18B | 31.12 | 85.28 | 1.82 |                              |
| tetM-01      | 18B | 23.65 | 76.27 | 1.98 |                              |
| tetM-02      | 18B | 23.39 | 77.76 | 2.05 |                              |
| tetO-01      | 18B |       |       |      | CurveFitFailed               |
| tetPA        | 18B |       |       |      | LowEfficiency, CtIsSmall, Ci |
| tetPB-01     | 18B | 36    | 79.76 | 1.86 | MultipleMeltPeaks            |
| tetPB-02     | 18B | 27.95 | 84.76 | 2.16 |                              |
| tetPB-03     | 18B |       |       |      | LowEfficiency, CtIsSmall, S: |
| tetPB-05     | 18B |       |       |      | LowEfficiency, CtIsSmall, S: |
| tetQ         | 18B |       |       |      | LowEfficiency, CtIsSmall, S: |
| tetR-02      | 18B | 30.53 | 87.83 | 1.95 | MultipleMeltPeaks            |
| tetR-03      | 18B |       |       |      | LowEfficiency, CtIsSmall, S: |
| tetS         | 18B | 33.42 | 85.38 | 2.13 |                              |

|             |     |       |       |      |                                          |
|-------------|-----|-------|-------|------|------------------------------------------|
| tetT        | 18B |       |       |      | CurveFitFailed                           |
| tetU-01     | 18B |       |       |      | LowEfficiency, CtIsSmall, S <sub>e</sub> |
| tetV        | 18B |       |       |      | LowEfficiency, CtIsSmall, S <sub>e</sub> |
| tetW-01     | 18B | 25.83 | 81.63 | 1.99 |                                          |
| tetX        | 18B |       |       |      | LowEfficiency, CtIsSmall, C <sub>i</sub> |
| tnpA-01     | 18B | 34.21 | 79.34 | 1.98 | MultipleMeltPeaks                        |
| tnpA-02     | 18B | 34.85 | 85.49 | 1.76 |                                          |
| tnpA-03     | 18B | 36.74 | 73.72 | 2.06 |                                          |
| tnpA-04     | 18B |       |       |      | CurveFitFailed                           |
| tnpA-05     | 18B | 29.9  | 80.73 | 1.92 |                                          |
| tnpA-07     | 18B |       |       |      | LowEfficiency, CtIsSmall, C <sub>i</sub> |
| tolC-01     | 18B |       |       |      | CurveFitFailed                           |
| tolC-02     | 18B | 29.71 | 87.58 | 2.01 |                                          |
| tolC-03     | 18B | 29.77 | 85.59 | 1.96 |                                          |
| Tp614       | 18B | 32.27 | 72.93 | 2.03 | MultipleMeltPeaks                        |
| ttgA        | 18B | 36.62 | 76.74 | 1.85 | MultipleMeltPeaks                        |
| ttgB        | 18B | 33.79 | 83.58 | 2    |                                          |
| vanA        | 18B |       |       |      | NoAmplification                          |
| vanB-01     | 18B | 33.48 | 85.81 | 2.04 | MultipleMeltPeaks                        |
| vanC-01     | 18B |       |       |      | LowEfficiency, CtIsSmall, S <sub>e</sub> |
| vanC-02     | 18B |       |       |      | LowEfficiency, CtIsSmall, C <sub>i</sub> |
| vanC-03     | 18B | 25.07 | 85.75 | 1.96 | MultipleMeltPeaks                        |
| vanC1       | 18B |       |       |      | LowEfficiency, CtIsSmall, C <sub>i</sub> |
| vanC2/vanC3 | 18B | 31.99 | 84.64 | 2.05 | MultipleMeltPeaks                        |
| vanG        | 18B |       |       |      | LowEfficiency, CtIsSmall, C <sub>i</sub> |
| vanHB       | 18B | 38.5  | 78.68 | 1.81 |                                          |
| vanHD       | 18B | 36.05 | 82.8  | 1.84 |                                          |
| vanRA-01    | 18B |       |       |      | LowEfficiency, CtIsSmall, C <sub>i</sub> |
| vanRA-02    | 18B |       |       |      | CurveFitFailed                           |
| vanRB       | 18B | 33.02 | 87.56 | 2.03 |                                          |
| vanRC       | 18B |       |       |      | LowEfficiency, CtIsSmall, C <sub>i</sub> |
| vanRC4      | 18B |       |       |      | CurveFitFailed                           |
| vanRD       | 18B |       |       |      | LowEfficiency, CtIsSmall, C <sub>i</sub> |
| vanSA       | 18B |       |       |      | LowEfficiency, CtIsSmall, S <sub>e</sub> |
| vanSB       | 18B |       |       |      | LowEfficiency, CtIsSmall, S <sub>e</sub> |
| vanSC-01    | 18B |       |       |      | LowEfficiency, CtIsSmall, S <sub>e</sub> |
| vanSC-02    | 18B |       |       |      | LowEfficiency, CtIsSmall, S <sub>e</sub> |
| vanTC-01    | 18B |       |       |      | CurveFitFailed                           |
| vanTC-02    | 18B |       |       |      | LowEfficiency, CtIsSmall, S <sub>e</sub> |
| vanTE       | 18B |       |       |      | LowEfficiency, CtIsSmall, S <sub>e</sub> |
| vanTG       | 18B |       |       |      | LowEfficiency, CtIsSmall, S <sub>e</sub> |
| vanWB       | 18B |       |       |      | BadR2, LowEfficiency, CtIsS              |
| vanWG       | 18B | 38.74 | 74.06 | 1.82 |                                          |
| vanXA       | 18B |       |       |      | LowEfficiency, CtIsSmall, S <sub>e</sub> |
| vanXB       | 18B |       |       |      | LowEfficiency, CtIsSmall, C <sub>i</sub> |
| vanXD       | 18B | 32.04 | 75.03 | 2.02 |                                          |

|              |     |       |       |      |                              |
|--------------|-----|-------|-------|------|------------------------------|
| vanYB        | 18B | 36.58 | 73.37 | 1.92 | MultipleMeltPeaks            |
| vanYD-01     | 18B | 30.82 | 83.45 | 1.94 | MultipleMeltPeaks            |
| vanYD-02     | 18B |       |       |      | LowEfficiency, CtIsSmall, S: |
| vatB-01      | 18B | 37.49 | 74.67 | 1.87 |                              |
| vatB-02      | 18B | 34.67 | 75.72 | 2.01 | MultipleMeltPeaks            |
| vatC-01      | 18B |       |       |      | CurveFitFailed               |
| vatC-02      | 18B | 33.39 | 86.5  | 1.92 |                              |
| vatE-01      | 18B | 30.3  | 76.68 | 2.15 |                              |
| vatE-02      | 18B | 33.77 | 76.52 | 2.03 |                              |
| vgaA-01      | 18B |       |       |      | CurveFitFailed               |
| vgaA-02      | 18B |       |       |      | CurveFitFailed               |
| vgb-01       | 18B | 35.4  | 75.2  | 1.94 | MultipleMeltPeaks            |
| vgbB-01      | 18B | 37.68 | 86.62 | 1.76 |                              |
| vgbB-02      | 18B |       |       |      | LowEfficiency, CtIsSmall, C: |
| yceE/mdtG-0  | 18B | 38.11 | 77.69 | 1.88 | MultipleMeltPeaks            |
| yceE/mdtG-0  | 18B | 35.73 | 81.29 | 1.88 |                              |
| yceL/mdtH-0  | 18B | 32.4  | 85.96 | 1.97 |                              |
| yceL/mdtH-0  | 18B |       |       |      | NoAmplification              |
| yceL/mdtH-0  | 18B | 36.36 | 84.92 | 1.82 |                              |
| yidY/mdtL-01 | 18B | 33.61 | 83.95 | 1.86 |                              |
| yidY/mdtL-02 | 18B |       |       |      | LowEfficiency, CtIsSmall, S: |

CurveFitFailed, HighBaseline

CurveFitFailed, HighBaseline

saturationBaselineRatiolsLow, CurveFitFailed, HighBaseline

CurveFitFailed, HighBaseline

CurveFitFailed, HighBaseline

saturationBaselineRatiolsLow, CurveFitFailed, HighBaseline

aturationBaselineRatiolsLow, CurveFitFailed, HighBaseline

aturationBaselineRatiolsLow, CurveFitFailed, HighBaseline

urveFitFailed, HighBaseline



CurveFitFailed, HighBaseline  
SaturationBaselineRatiosLow, CurveFitFailed, HighBaseline

CurveFitFailed, HighBaseline

CurveFitFailed, HighBaseline

SaturationBaselineRatiosLow, CurveFitFailed, HighBaseline

CurveFitFailed, HighBaseline

Small, CurveFitFailed, HighBaseline

CurveFitFailed, HighBaseline

CurveFitFailed, HighBaseline

CurveFitFailed, HighBaseline

CurveFitFailed, HighBaseline

CurveFitFailed, HighBaseline

saturationBaselineRatiosLow, CurveFitFailed  
saturationBaselineRatiosLow, CurveFitFailed, HighBaseline

CurveFitFailed, HighBaseline  
CurveFitFailed, HighBaseline

CurveFitFailed, HighBaseline

saturationBaselineRatiosLow, CurveFitFailed, HighBaseline  
CurveFitFailed, HighBaseline

Small, CurveFitFailed, HighBaseline

CurveFitFailed, HighBaseline

CurveFitFailed, HighBaseline  
SaturationBaselineRatiosLow, CurveFitFailed, HighBaseline  
SaturationBaselineRatiosLow, CurveFitFailed, HighBaseline

CurveFitFailed, HighBaseline  
CurveFitFailed, HighBaseline

CurveFitFailed, HighBaseline  
CurveFitFailed, HighBaseline  
CurveFitFailed, HighBaseline  
CurveFitFailed, HighBaseline

SaturationBaselineRatiosLow, CurveFitFailed, HighBaseline

CurveFitFailed, HighBaseline

CurveFitFailed, HighBaseline

CurveFitFailed, HighBaseline

saturationBaselineRatiosLow, CurveFitFailed, HighBaseline

CurveFitFailed, HighBaseline

saturationBaselineRatiosLow, CurveFitFailed, HighBaseline

CurveFitFailed, HighBaseline

CurveFitFailed, HighBaseline

saturationBaselineRatiosLow, CurveFitFailed, HighBaseline

SaturationBaselineRatiosLow, CurveFitFailed, HighBaseline

Small, SaturationBaselineRatiosLow, CurveFitFailed, HighBaseline

SaturationBaselineRatiosLow, CurveFitFailed, HighBaseline

CurveFitFailed, HighBaseline

SaturationBaselineRatiosLow, CurveFitFailed, HighBaseline

CurveFitFailed, HighBaseline

SaturationBaselineRatiosLow, CurveFitFailed, HighBaseline

Low, MultipleMeltPeaks

OW

ow, MultipleMeltPeaks

OW



ow, MultipleMeltPeaks



ow

ow, MultipleMeltPeaks



| Assay          | Sample | Ct    | Tm    | Efficiency | flag                      |
|----------------|--------|-------|-------|------------|---------------------------|
| 16S rRNA       | 18C    |       | 14.48 | 82.13      | 1.92                      |
| aac            | 18C    |       |       |            | NoAmplification           |
| aac(6')-Ib(akz | 18C    | 31.8  | 81.7  | 1.69       |                           |
| aac(6')-Ib(akz | 18C    | 34.81 | 81.88 | 1.98       | MultipleMeltPeaks         |
| aac(6')-Ib(akz | 18C    | 34.32 | 90.07 | 1.87       | SaturationBaselineRatiosL |
| aac(6')-II     | 18C    |       |       |            | NoAmplification           |
| aac(6')I1      | 18C    |       |       |            | NoAmplification           |
| aacA/aphD      | 18C    |       |       |            | NoAmplification           |
| aacC           | 18C    | 33.35 | 84.96 | 1.68       | MultipleMeltPeaks         |
| aacC1          | 18C    |       |       |            | NoAmplification           |
| aacC2          | 18C    |       |       |            | NoAmplification           |
| aacC4          | 18C    |       |       |            | NoAmplification           |
| aadA-01        | 18C    |       |       |            | NoAmplification           |
| aadA-02        | 18C    |       |       |            | NoAmplification           |
| aadA-1-01      | 18C    |       |       |            | NoAmplification           |
| aadA-1-02      | 18C    |       |       |            | NoAmplification           |
| aadA1          | 18C    |       |       |            | NoAmplification           |
| aadA2-01       | 18C    |       |       |            | NoAmplification           |
| aadA2-02       | 18C    |       |       |            | NoAmplification           |
| aadA2-03       | 18C    |       |       |            | NoAmplification           |
| aadA5-01       | 18C    |       |       |            | NoAmplification           |
| aadA5-02       | 18C    | 34.05 | 88.18 | 1.69       |                           |
| aadA9-01       | 18C    |       |       |            | NoAmplification           |
| aadA9-02       | 18C    |       |       |            | NoAmplification           |
| aadD           | 18C    |       |       |            | NoAmplification           |
| aadE           | 18C    |       |       |            | NoAmplification           |
| acrA-01        | 18C    | 32.16 | 88.71 | 1.72       |                           |
| acrA-02        | 18C    |       |       |            | NoAmplification           |
| acrA-03        | 18C    |       |       |            | NoAmplification           |
| acrA-04        | 18C    |       |       |            | NoAmplification           |
| acrA-05        | 18C    | 33.39 | 88.64 | 1.96       |                           |
| acrB-01        | 18C    |       |       |            | NoAmplification           |
| acrF           | 18C    | 32.6  | 82.98 | 1.58       | SaturationBaselineRatiosL |
| acrR-01        | 18C    | 35.88 | 80.87 | 1.94       | MultipleMeltPeaks         |
| acrR-02        | 18C    | 36.6  | 85.15 | 1.72       | MultipleMeltPeaks         |
| Actin          | 18C    | 18.31 | 86.84 | 1.79       |                           |
| adeA           | 18C    |       |       |            | NoAmplification           |
| ampC-01        | 18C    |       |       |            | NoAmplification           |
| ampC-02        | 18C    |       |       |            | NoAmplification           |
| ampC-04        | 18C    |       |       |            | NoAmplification           |
| ampC-05        | 18C    |       |       |            | NoAmplification           |
| ampC-06        | 18C    |       |       |            | NoAmplification           |
| ampC-07        | 18C    |       |       |            | NoAmplification           |
| ampC-09        | 18C    |       |       |            | NoAmplification           |
| ampC/blaDH     | 18C    | 32.77 | 87.03 | 1.76       | MultipleMeltPeaks         |

|                          |     |       |       |      |                           |
|--------------------------|-----|-------|-------|------|---------------------------|
| aph                      | 18C |       |       |      | NoAmplification           |
| aph(2')-Id-01            | 18C |       |       |      | NoAmplification           |
| aph(2')-Id-02            | 18C |       |       |      | NoAmplification           |
| aph6ia                   | 18C |       |       |      | NoAmplification           |
| aphA1(aka k <sub>z</sub> | 18C |       |       |      | NoAmplification           |
| bacA-01                  | 18C |       |       |      | NoAmplification           |
| bacA-02                  | 18C |       |       |      | NoAmplification           |
| BETA-globin              | 18C | 19.05 | 84.08 | 1.92 |                           |
| bla-ACC-1                | 18C |       |       |      | NoAmplification           |
| bla-L1                   | 18C | 32.67 | 84.95 | 1.99 |                           |
| bla1                     | 18C |       |       |      | NoAmplification           |
| blaCMY                   | 18C |       |       |      | NoAmplification           |
| blaCMY2-01               | 18C |       |       |      | NoAmplification           |
| blaCMY2-02               | 18C | 31.26 | 85.09 | 1.66 | MultipleMeltPeaks         |
| blaCTX-M-01              | 18C |       |       |      | NoAmplification           |
| blaCTX-M-02              | 18C |       |       |      | NoAmplification           |
| blaCTX-M-03              | 18C |       |       |      | NoAmplification           |
| blaCTX-M-04              | 18C |       |       |      | NoAmplification           |
| blaCTX-M-05              | 18C |       |       |      | NoAmplification           |
| blaCTX-M-06              | 18C |       |       |      | NoAmplification           |
| blaGES                   | 18C |       |       |      | NoAmplification           |
| blaIMP-01                | 18C |       |       |      | NoAmplification           |
| blaIMP-02                | 18C |       |       |      | NoAmplification           |
| blaMOX/blaC              | 18C |       |       |      | NoAmplification           |
| blaOCH                   | 18C |       |       |      | NoAmplification           |
| blaOKP                   | 18C |       |       |      | NoAmplification           |
| blaOXA1/blaC             | 18C |       |       |      | NoAmplification           |
| blaOXA10-01              | 18C |       |       |      | NoAmplification           |
| blaOXA10-02              | 18C |       |       |      | NoAmplification           |
| blaOXY                   | 18C |       |       |      | NoAmplification           |
| blaPAO                   | 18C |       |       |      | NoAmplification           |
| blaPER                   | 18C |       |       |      | NoAmplification           |
| blaPSE                   | 18C |       |       |      | NoAmplification           |
| blaROB                   | 18C |       |       |      | NoAmplification           |
| blaSFO                   | 18C | 34.03 | 89.65 | 1.67 |                           |
| blaSHV-01                | 18C |       |       |      | NoAmplification           |
| blaSHV-02                | 18C |       |       |      | NoAmplification           |
| blaTEM                   | 18C |       |       |      | NoAmplification           |
| blaTLA                   | 18C |       |       |      | NoAmplification           |
| blaVEB                   | 18C |       |       |      | NoAmplification           |
| blaVIM                   | 18C |       |       |      | NoAmplification           |
| blaZ                     | 18C |       |       |      | NoAmplification           |
| carB                     | 18C |       |       |      | NoAmplification           |
| catA1                    | 18C |       |       |      | NoAmplification           |
| catB3                    | 18C | 34.6  | 87.46 | 1.97 | SaturationBaselineRatiosL |
| catB8                    | 18C | 32.62 | 82.87 | 1.78 |                           |

|            |     |       |       |      |                            |
|------------|-----|-------|-------|------|----------------------------|
| ceoA       | 18C | 33.82 | 82.06 | 1.92 | MultipleMeltPeaks          |
| cepA       | 18C |       |       |      | NoAmplification            |
| cfiA       | 18C | 31.18 | 86.19 | 1.71 |                            |
| cfr        | 18C |       |       |      | NoAmplification            |
| cfxA       | 18C | 21.94 | 77.09 | 1.63 |                            |
| cmeA       | 18C |       |       |      | NoAmplification            |
| cmlA1-01   | 18C |       |       |      | NoAmplification            |
| cmlA1-02   | 18C |       |       |      | NoAmplification            |
| cmr        | 18C |       |       |      | NoAmplification            |
| cmx(A)     | 18C | 29.85 | 85.58 | 1.71 |                            |
| cphA-01    | 18C |       |       |      | NoAmplification            |
| cphA-02    | 18C |       |       |      | NoAmplification            |
| dfrA1      | 18C |       |       |      | NoAmplification            |
| dfrA12     | 18C |       |       |      | NoAmplification            |
| emrD       | 18C |       |       |      | NoAmplification            |
| ereA       | 18C |       |       |      | NoAmplification            |
| ereB       | 18C |       |       |      | CurveFitFailed             |
| erm(34)    | 18C |       |       |      | NoAmplification            |
| erm(35)    | 18C |       |       |      | NoAmplification            |
| erm(36)    | 18C |       |       |      | NoAmplification            |
| ermA       | 18C |       |       |      | NoAmplification            |
| ermA/ermTR | 18C |       |       |      | NoAmplification            |
| ermB       | 18C |       |       |      | NoAmplification            |
| ermC       | 18C |       |       |      | NoAmplification            |
| ermF       | 18C |       |       |      | NoAmplification            |
| ermJ/ermD  | 18C |       |       |      | NoAmplification            |
| ermK-01    | 18C |       |       |      | NoAmplification            |
| ermK-02    | 18C |       |       |      | NoAmplification            |
| ermT-01    | 18C |       |       |      | NoAmplification            |
| ermT-02    | 18C |       |       |      | NoAmplification            |
| ermX       | 18C | 30.33 | 82.83 | 1.67 | SaturationBaselineRatiolsL |
| ermY       | 18C |       |       |      | NoAmplification            |
| fabK       | 18C |       |       |      | NoAmplification            |
| floR       | 18C |       |       |      | NoAmplification            |
| folA       | 18C |       |       |      | NoAmplification            |
| fosB       | 18C |       |       |      | NoAmplification            |
| fosX       | 18C |       |       |      | NoAmplification            |
| fox5       | 18C | 31.05 | 87.28 | 1.46 | MultipleMeltPeaks          |
| imiR       | 18C |       |       |      | NoAmplification            |
| ImrA-01    | 18C |       |       |      | NoAmplification            |
| intl       | 18C | 32.07 | 88.85 | 1.68 |                            |
| intl1      | 18C | 21.93 | 87.26 | 2.15 |                            |
| IS613      | 18C |       |       |      | NoAmplification            |
| lnuA-01    | 18C |       |       |      | NoAmplification            |
| lnuB-01    | 18C |       |       |      | NoAmplification            |
| lnuB-02    | 18C |       |       |      | NoAmplification            |

|                |     |       |       |      |                           |
|----------------|-----|-------|-------|------|---------------------------|
| lnuC           | 18C | 32.08 | 87.41 | 1.73 |                           |
| marR-01        | 18C |       |       |      | NoAmplification           |
| matA/mel       | 18C | 20.25 | 77.2  | 1.94 |                           |
| mdet1          | 18C |       |       |      | NoAmplification           |
| mdtA           | 18C |       |       |      | NoAmplification           |
| mdtE/yhiU      | 18C | 31.16 | 80.49 | 1.73 |                           |
| mecA           | 18C | 30.8  | 73.91 | 1.55 | MultipleMeltPeaks         |
| mefA           | 18C | 19.8  | 80.31 | 1.9  |                           |
| mepA           | 18C |       |       |      | NoAmplification           |
| mexA           | 18C |       |       |      | NoAmplification           |
| mexD           | 18C |       |       |      | NoAmplification           |
| mexE           | 18C |       |       |      | NoAmplification           |
| mexF           | 18C |       |       |      | NoAmplification           |
| mphA-01        | 18C | 31.07 | 89.14 | 1.59 | MultipleMeltPeaks         |
| mphA-02        | 18C |       |       |      | NoAmplification           |
| mphB           | 18C |       |       |      | NoAmplification           |
| mphC           | 18C |       |       |      | NoAmplification           |
| msrA-01        | 18C |       |       |      | NoAmplification           |
| msrC-01        | 18C |       |       |      | NoAmplification           |
| mtrC-01        | 18C |       |       |      | NoAmplification           |
| mtrC-02        | 18C |       |       |      | NoAmplification           |
| mtrD-02        | 18C | 29.82 | 81.15 | 1.9  |                           |
| mtrD-03        | 18C |       |       |      | NoAmplification           |
| NDM1           | 18C |       |       |      | NoAmplification           |
| nimE           | 18C |       |       |      | NoAmplification           |
| nisB           | 18C |       |       |      | NoAmplification           |
| oleC           | 18C |       |       |      | NoAmplification           |
| oprD           | 18C | 30.6  | 86.74 | 1.77 |                           |
| oprJ           | 18C |       |       |      | NoAmplification           |
| pbp            | 18C |       |       |      | NoAmplification           |
| pbp2x          | 18C |       |       |      | NoAmplification           |
| Pbp5           | 18C |       |       |      | NoAmplification           |
| penA           | 18C |       |       |      | NoAmplification           |
| pikR1          | 18C |       |       |      | NoAmplification           |
| pikR2          | 18C |       |       |      | NoAmplification           |
| pmrA           | 18C | 24.02 | 79.27 | 1.7  |                           |
| pncA           | 18C | 35    | 87.1  | 1.87 | SaturationBaselineRatiosL |
| putative multi | 18C |       |       |      | NoAmplification           |
| qac            | 18C |       |       |      | NoAmplification           |
| qacA           | 18C |       |       |      | NoAmplification           |
| qacA/qacB      | 18C |       |       |      | NoAmplification           |
| qacEdelta1-0   | 18C |       |       |      | NoAmplification           |
| qacEdelta1-0   | 18C | 33.61 | 79.93 | 1.79 | MultipleMeltPeaks         |
| qacH-01        | 18C |       |       |      | NoAmplification           |
| qacH-02        | 18C |       |       |      | NoAmplification           |
| qnrA           | 18C | 34.52 | 72.9  | 1.91 | MultipleMeltPeaks         |



|              |     |       |       |      |                   |
|--------------|-----|-------|-------|------|-------------------|
| rarD-02      | 18C |       |       |      | NoAmplification   |
| sat4         | 18C |       |       |      | NoAmplification   |
| sdeB         | 18C |       |       |      | NoAmplification   |
| spcN-01      | 18C |       |       |      | NoAmplification   |
| speA         | 18C |       |       |      | NoAmplification   |
| str          | 18C |       |       |      | NoAmplification   |
| strA         | 18C |       |       |      | NoAmplification   |
| strB         | 18C | 31.64 | 83.58 | 1.79 |                   |
| sul1         | 18C |       |       |      | NoAmplification   |
| sul2         | 18C |       |       |      | NoAmplification   |
| sulA/foIP-01 | 18C | 20.59 | 81.12 | 1.84 |                   |
| sulA/foIP-03 | 18C | 24.69 | 82.44 | 1.85 |                   |
| tet(32)      | 18C |       |       |      | NoAmplification   |
| tet(34)      | 18C | 34.18 | 74.84 | 1.79 | MultipleMeltPeaks |
| tet(35)      | 18C |       |       |      | NoAmplification   |
| tet(36)-A    | 18C |       |       |      | NoAmplification   |
| tet(36)-B    | 18C |       |       |      | NoAmplification   |
| tet(37)      | 18C | 34.06 | 87.37 | 1.86 |                   |
| tetA-01      | 18C |       |       |      | NoAmplification   |
| tetA-02      | 18C |       |       |      | NoAmplification   |
| tetB-01      | 18C | 34.87 | 87.48 | 1.82 |                   |
| tetB-02      | 18C |       |       |      | NoAmplification   |
| tetC-01      | 18C |       |       |      | NoAmplification   |
| tetC-02      | 18C |       |       |      | NoAmplification   |
| tetD-01      | 18C |       |       |      | NoAmplification   |
| tetD-02      | 18C |       |       |      | NoAmplification   |
| tetE         | 18C |       |       |      | NoAmplification   |
| tetG-01      | 18C |       |       |      | NoAmplification   |
| tetG-02      | 18C |       |       |      | NoAmplification   |
| tetH         | 18C |       |       |      | NoAmplification   |
| tetJ         | 18C |       |       |      | NoAmplification   |
| tetK         | 18C |       |       |      | NoAmplification   |
| tetL-01      | 18C |       |       |      | NoAmplification   |
| tetL-02      | 18C |       |       |      | NoAmplification   |
| tetM-01      | 18C | 21.02 | 75.59 | 1.83 | MultipleMeltPeaks |
| tetM-02      | 18C | 20.92 | 77.32 | 1.95 |                   |
| tetO-01      | 18C |       |       |      | NoAmplification   |
| tetPA        | 18C |       |       |      | NoAmplification   |
| tetPB-01     | 18C |       |       |      | NoAmplification   |
| tetPB-02     | 18C |       |       |      | NoAmplification   |
| tetPB-03     | 18C |       |       |      | NoAmplification   |
| tetPB-05     | 18C |       |       |      | NoAmplification   |
| tetQ         | 18C |       |       |      | NoAmplification   |
| tetR-02      | 18C | 33.07 | 87.32 | 1.65 |                   |
| tetR-03      | 18C |       |       |      | NoAmplification   |
| tetS         | 18C |       |       |      | NoAmplification   |

|             |     |       |       |      |                           |
|-------------|-----|-------|-------|------|---------------------------|
| tetT        | 18C |       |       |      | NoAmplification           |
| tetU-01     | 18C |       |       |      | NoAmplification           |
| tetV        | 18C |       |       |      | NoAmplification           |
| tetW-01     | 18C | 24.42 | 81.49 | 1.87 |                           |
| tetX        | 18C |       |       |      | NoAmplification           |
| tnpA-01     | 18C | 32.55 | 74.65 | 1.79 | MultipleMeltPeaks         |
| tnpA-02     | 18C |       |       |      | NoAmplification           |
| tnpA-03     | 18C | 31.29 | 77.23 | 1.61 |                           |
| tnpA-04     | 18C | 31.31 | 82.03 | 1.7  |                           |
| tnpA-05     | 18C | 31.43 | 80.39 | 1.73 |                           |
| tnpA-07     | 18C |       |       |      | NoAmplification           |
| tolC-01     | 18C |       |       |      | NoAmplification           |
| tolC-02     | 18C | 32.77 | 83.5  | 1.74 | MultipleMeltPeaks         |
| tolC-03     | 18C | 33.6  | 87.4  | 1.74 |                           |
| Tp614       | 18C | 32.95 | 83.09 | 1.73 |                           |
| ttgA        | 18C |       |       |      | NoAmplification           |
| ttgB        | 18C |       |       |      | NoAmplification           |
| vanA        | 18C |       |       |      | NoAmplification           |
| vanB-01     | 18C |       |       |      | NoAmplification           |
| vanC-01     | 18C |       |       |      | NoAmplification           |
| vanC-02     | 18C |       |       |      | NoAmplification           |
| vanC-03     | 18C | 27.7  | 85.11 | 1.88 | MultipleMeltPeaks         |
| vanC1       | 18C |       |       |      | NoAmplification           |
| vanC2/vanC3 | 18C | 32.75 | 84.83 | 1.55 | SaturationBaselineRatiosL |
| vanG        | 18C |       |       |      | NoAmplification           |
| vanHB       | 18C |       |       |      | NoAmplification           |
| vanHD       | 18C |       |       |      | NoAmplification           |
| vanRA-01    | 18C |       |       |      | NoAmplification           |
| vanRA-02    | 18C |       |       |      | NoAmplification           |
| vanRB       | 18C |       |       |      | NoAmplification           |
| vanRC       | 18C |       |       |      | NoAmplification           |
| vanRC4      | 18C |       |       |      | NoAmplification           |
| vanRD       | 18C |       |       |      | NoAmplification           |
| vanSA       | 18C |       |       |      | NoAmplification           |
| vanSB       | 18C |       |       |      | NoAmplification           |
| vanSC-01    | 18C |       |       |      | NoAmplification           |
| vanSC-02    | 18C |       |       |      | NoAmplification           |
| vanTC-01    | 18C |       |       |      | NoAmplification           |
| vanTC-02    | 18C |       |       |      | NoAmplification           |
| vanTE       | 18C |       |       |      | NoAmplification           |
| vanTG       | 18C |       |       |      | NoAmplification           |
| vanWB       | 18C |       |       |      | NoAmplification           |
| vanWG       | 18C | 35.08 | 74.27 | 2.03 | SaturationBaselineRatiosL |
| vanXA       | 18C |       |       |      | NoAmplification           |
| vanXB       | 18C |       |       |      | NoAmplification           |
| vanXD       | 18C |       |       |      | NoAmplification           |

|              |     |       |       |      |                   |
|--------------|-----|-------|-------|------|-------------------|
| vanYB        | 18C |       |       |      | CurveFitFailed    |
| vanYD-01     | 18C | 32.21 | 85.27 | 1.71 |                   |
| vanYD-02     | 18C |       |       |      | NoAmplification   |
| vatB-01      | 18C |       |       |      | NoAmplification   |
| vatB-02      | 18C |       |       |      | NoAmplification   |
| vatC-01      | 18C |       |       |      | NoAmplification   |
| vatC-02      | 18C |       |       |      | CurveFitFailed    |
| vatE-01      | 18C |       |       |      | NoAmplification   |
| vatE-02      | 18C |       |       |      | NoAmplification   |
| vgaA-01      | 18C |       |       |      | NoAmplification   |
| vgaA-02      | 18C |       |       |      | NoAmplification   |
| vgb-01       | 18C |       |       |      | NoAmplification   |
| vgbB-01      | 18C |       |       |      | NoAmplification   |
| vgbB-02      | 18C |       |       |      | NoAmplification   |
| yceE/mdtG-0  | 18C |       |       |      | NoAmplification   |
| yceE/mdtG-0  | 18C |       |       |      | NoAmplification   |
| yceL/mdtH-0  | 18C |       |       |      | CurveFitFailed    |
| yceL/mdtH-0  | 18C |       |       |      | NoAmplification   |
| yceL/mdtH-0  | 18C | 34.96 | 77.39 | 1.85 | MultipleMeltPeaks |
| yidY/mdtL-01 | 18C |       |       |      | NoAmplification   |
| yidY/mdtL-02 | 18C |       |       |      | NoAmplification   |































| Assay          | Sample | Ct | Tm    | Efficiency | flag                   |
|----------------|--------|----|-------|------------|------------------------|
| 16S rRNA       | 19A    |    | 15.36 | 81.23      | 2                      |
| aac            | 19A    |    | 30.07 | 81.62      | 1.65 MultipleMeltPeaks |
| aac(6')-Ib(akz | 19A    |    |       |            | NoAmplification        |
| aac(6')-Ib(akz | 19A    |    | 32.63 | 86.07      | 1.95 MultipleMeltPeaks |
| aac(6')-Ib(akz | 19A    |    | 31.84 | 84.2       | 2                      |
| aac(6')-II     | 19A    |    | 35.5  | 83.88      | 1.76 MultipleMeltPeaks |
| aac(6')I1      | 19A    |    | 36.29 | 87.69      | 1.81                   |
| aacA/aphD      | 19A    |    |       |            | NoAmplification        |
| aacC           | 19A    |    | 31.58 | 91.8       | 1.94 MultipleMeltPeaks |
| aacC1          | 19A    |    |       |            | NoAmplification        |
| aacC2          | 19A    |    |       |            | NoAmplification        |
| aacC4          | 19A    |    | 34.84 | 80.16      | 1.81                   |
| aadA-01        | 19A    |    | 39.09 | 77.04      | 1.88                   |
| aadA-02        | 19A    |    |       |            | NoAmplification        |
| aadA-1-01      | 19A    |    | 35.99 | 75.23      | 1.82 MultipleMeltPeaks |
| aadA-1-02      | 19A    |    |       |            | NoAmplification        |
| aadA1          | 19A    |    | 35.35 | 83.21      | 1.99                   |
| aadA2-01       | 19A    |    | 34.7  | 84.66      | 1.9                    |
| aadA2-02       | 19A    |    | 32.18 | 75.11      | 1.83                   |
| aadA2-03       | 19A    |    |       |            | NoAmplification        |
| aadA5-01       | 19A    |    | 35.58 | 78.47      | 1.9                    |
| aadA5-02       | 19A    |    | 34.67 | 83.49      | 1.91 MultipleMeltPeaks |
| aadA9-01       | 19A    |    | 35.39 | 89.91      | 1.83 MultipleMeltPeaks |
| aadA9-02       | 19A    |    |       |            | NoAmplification        |
| aadD           | 19A    |    |       |            | NoAmplification        |
| aadE           | 19A    |    |       |            | NoAmplification        |
| acrA-01        | 19A    |    | 30.61 | 88.74      | 1.96                   |
| acrA-02        | 19A    |    |       |            | NoAmplification        |
| acrA-03        | 19A    |    |       |            | NoAmplification        |
| acrA-04        | 19A    |    | 31.09 | 80.43      | 1.97                   |
| acrA-05        | 19A    |    | 31.6  | 88.4       | 1.96 MultipleMeltPeaks |
| acrB-01        | 19A    |    |       |            | NoAmplification        |
| acrF           | 19A    |    | 31.84 | 81.92      | 1.85 MultipleMeltPeaks |
| acrR-01        | 19A    |    | 33.83 | 89.09      | 1.89 MultipleMeltPeaks |
| acrR-02        | 19A    |    | 30.64 | 85.97      | 1.98                   |
| Actin          | 19A    |    | 20.96 | 87.06      | 2                      |
| adeA           | 19A    |    | 37.79 | 86.15      | 1.76 MultipleMeltPeaks |
| ampC-01        | 19A    |    | 34.77 | 85.42      | 1.87                   |
| ampC-02        | 19A    |    |       |            | CurveFitFailed         |
| ampC-04        | 19A    |    | 33.22 | 78.03      | 1.7                    |
| ampC-05        | 19A    |    |       |            | NoAmplification        |
| ampC-06        | 19A    |    |       |            | NoAmplification        |
| ampC-07        | 19A    |    | 35.89 | 88.36      | 1.8                    |
| ampC-09        | 19A    |    |       |            | NoAmplification        |
| ampC/blaDH     | 19A    |    | 30.01 | 76.78      | 1.98 MultipleMeltPeaks |

|                          |     |       |       |      |                   |
|--------------------------|-----|-------|-------|------|-------------------|
| aph                      | 19A |       |       |      | NoAmplification   |
| aph(2')-Id-01            | 19A |       |       |      | NoAmplification   |
| aph(2')-Id-02            | 19A |       |       |      | NoAmplification   |
| aph6ia                   | 19A | 33.6  | 77.84 | 1.95 | MultipleMeltPeaks |
| aphA1(aka k <sub>z</sub> | 19A |       |       |      | NoAmplification   |
| bacA-01                  | 19A |       |       |      | NoAmplification   |
| bacA-02                  | 19A | 31.73 | 87.85 | 1.85 |                   |
| BETA-globin              | 19A | 21.63 | 84.07 | 1.99 |                   |
| bla-ACC-1                | 19A | 38.13 | 66.01 | 1.77 | MultipleMeltPeaks |
| bla-L1                   | 19A | 28.88 | 84.5  | 1.99 |                   |
| bla1                     | 19A |       |       |      | NoAmplification   |
| blaCMY                   | 19A | 38.68 | 81.64 | 1.89 |                   |
| blaCMY2-01               | 19A |       |       |      | NoAmplification   |
| blaCMY2-02               | 19A | 28.57 | 88.52 | 1.98 |                   |
| blaCTX-M-01              | 19A | 36.04 | 89.88 | 1.94 | MultipleMeltPeaks |
| blaCTX-M-02              | 19A |       |       |      | NoAmplification   |
| blaCTX-M-03              | 19A |       |       |      | NoAmplification   |
| blaCTX-M-04              | 19A |       |       |      | NoAmplification   |
| blaCTX-M-05              | 19A | 36.58 | 75.97 | 1.73 |                   |
| blaCTX-M-06              | 19A |       |       |      | NoAmplification   |
| blaGES                   | 19A |       |       |      | NoAmplification   |
| blaIMP-01                | 19A |       |       |      | NoAmplification   |
| blaIMP-02                | 19A | 36.36 | 85.19 | 1.86 |                   |
| blaMOX/blaC              | 19A | 39.3  | 81.95 | 1.74 | MultipleMeltPeaks |
| blaOCH                   | 19A |       |       |      | NoAmplification   |
| blaOKP                   | 19A |       |       |      | NoAmplification   |
| blaOXA1/blaC             | 19A |       |       |      | NoAmplification   |
| blaOXA10-01              | 19A |       |       |      | NoAmplification   |
| blaOXA10-02              | 19A |       |       |      | NoAmplification   |
| blaOXY                   | 19A |       |       |      | NoAmplification   |
| blaPAO                   | 19A |       |       |      | NoAmplification   |
| blaPER                   | 19A |       |       |      | NoAmplification   |
| blaPSE                   | 19A |       |       |      | NoAmplification   |
| blaROB                   | 19A |       |       |      | NoAmplification   |
| blaSFO                   | 19A | 31.34 | 89.79 | 1.84 |                   |
| blaSHV-01                | 19A | 36.39 | 72.64 | 1.52 | MultipleMeltPeaks |
| blaSHV-02                | 19A |       |       |      | CurveFitFailed    |
| blaTEM                   | 19A | 17.47 | 79.24 | 1.86 |                   |
| blaTLA                   | 19A |       |       |      | NoAmplification   |
| blaVEB                   | 19A |       |       |      | NoAmplification   |
| blaVIM                   | 19A |       |       |      | NoAmplification   |
| blaZ                     | 19A |       |       |      | NoAmplification   |
| carB                     | 19A | 38.93 | 81.2  | 1.82 |                   |
| catA1                    | 19A |       |       |      | NoAmplification   |
| catB3                    | 19A | 32.69 | 87.57 | 1.94 |                   |
| catB8                    | 19A | 26.5  | 84.21 | 1.94 | MultipleMeltPeaks |

|            |     |       |       |      |                              |
|------------|-----|-------|-------|------|------------------------------|
| ceoA       | 19A | 28.08 | 82.09 | 1.96 | MultipleMeltPeaks            |
| cepA       | 19A |       |       |      | NoAmplification              |
| cfiA       | 19A | 28.8  | 87.83 | 1.91 | MultipleMeltPeaks            |
| cfr        | 19A |       |       |      | NoAmplification              |
| cfxA       | 19A | 27.17 | 77.31 | 1.91 |                              |
| cmeA       | 19A |       |       |      | NoAmplification              |
| cmlA1-01   | 19A | 37.96 | 80.23 | 1.89 |                              |
| cmlA1-02   | 19A | 37.73 | 81.94 | 1.9  |                              |
| cmr        | 19A |       |       |      | NoAmplification              |
| cmx(A)     | 19A | 27.2  | 84.54 | 1.93 | MultipleMeltPeaks            |
| cphA-01    | 19A | 35.44 | 85.71 | 1.9  |                              |
| cphA-02    | 19A | 40.26 | 82.44 | 1.78 |                              |
| dfrA1      | 19A |       |       |      | NoAmplification              |
| dfrA12     | 19A | 37.23 | 85.27 | 1.72 | MultipleMeltPeaks            |
| emrD       | 19A |       |       |      | NoAmplification              |
| ereA       | 19A |       |       |      | NoAmplification              |
| ereB       | 19A | 32.59 | 80.77 | 1.93 | MultipleMeltPeaks            |
| erm(34)    | 19A |       |       |      | NoAmplification              |
| erm(35)    | 19A |       |       |      | NoAmplification              |
| erm(36)    | 19A | 36.79 | 86.57 | 1.74 |                              |
| ermA       | 19A |       |       |      | NoAmplification              |
| ermA/ermTR | 19A |       |       |      | NoAmplification              |
| ermB       | 19A |       |       |      | NoAmplification              |
| ermC       | 19A |       |       |      | NoAmplification              |
| ermF       | 19A | 30.3  | 72.27 | 2.04 |                              |
| ermJ/ermD  | 19A |       |       |      | NoAmplification              |
| ermK-01    | 19A | 40.86 | 81.16 | 1.7  | MultipleMeltPeaks            |
| ermK-02    | 19A |       |       |      | NoAmplification              |
| ermT-01    | 19A |       |       |      | NoAmplification              |
| ermT-02    | 19A | 37.55 | 65.34 | 1.68 | MultipleMeltPeaks            |
| ermX       | 19A | 35.19 | 87.05 | 1.74 |                              |
| ermY       | 19A |       |       |      | NoAmplification              |
| fabK       | 19A | 20.49 | 77.35 | 1.93 |                              |
| floR       | 19A |       |       |      | NoAmplification              |
| folA       | 19A |       |       |      | NoAmplification              |
| fosB       | 19A |       |       |      | LowEfficiency, CtIsSmall, S: |
| fosX       | 19A |       |       |      | NoAmplification              |
| fox5       | 19A | 29.57 | 86.36 | 1.85 |                              |
| imiR       | 19A |       |       |      | NoAmplification              |
| ImrA-01    | 19A | 35.56 | 87.4  | 1.89 | MultipleMeltPeaks            |
| intl       | 19A | 29.55 | 84.59 | 1.97 | MultipleMeltPeaks            |
| intl1      | 19A | 20.19 | 87.4  | 1.99 |                              |
| IS613      | 19A |       |       |      | NoAmplification              |
| lnuA-01    | 19A |       |       |      | NoAmplification              |
| lnuB-01    | 19A |       |       |      | NoAmplification              |
| lnuB-02    | 19A |       |       |      | NoAmplification              |

|                |     |       |       |                        |
|----------------|-----|-------|-------|------------------------|
| lnuC           | 19A | 32.33 | 86.7  | 1.91                   |
| marR-01        | 19A | 31.19 | 85.3  | 1.94                   |
| matA/mel       | 19A | 24.15 | 77.57 | 2.04                   |
| mdet1          | 19A |       |       | NoAmplification        |
| mdtA           | 19A | 36.14 | 81.99 | 1.7 MultipleMeltPeaks  |
| mdtE/yhiU      | 19A | 38.15 | 79.95 | 1.89 MultipleMeltPeaks |
| mecA           | 19A |       |       | NoAmplification        |
| mefA           | 19A | 23.55 | 80.5  | 1.97                   |
| mepA           | 19A | 37.69 | 85.41 | 1.88 MultipleMeltPeaks |
| mexA           | 19A |       |       | NoAmplification        |
| mexD           | 19A | 34.72 | 79.86 | 2.04                   |
| mexE           | 19A | 35.55 | 83.2  | 1.85                   |
| mexF           | 19A | 31.26 | 80.9  | 1.93 MultipleMeltPeaks |
| mphA-01        | 19A | 29.33 | 87    | 1.93 MultipleMeltPeaks |
| mphA-02        | 19A | 31.13 | 86.72 | 1.52                   |
| mphB           | 19A | 37.11 | 72.21 | 1.75 MultipleMeltPeaks |
| mphC           | 19A |       |       | NoAmplification        |
| msrA-01        | 19A |       |       | NoAmplification        |
| msrC-01        | 19A |       |       | NoAmplification        |
| mtrC-01        | 19A |       |       | NoAmplification        |
| mtrC-02        | 19A | 39.34 | 81.23 | 1.69 MultipleMeltPeaks |
| mtrD-02        | 19A | 28.48 | 81.34 | 1.92                   |
| mtrD-03        | 19A |       |       | NoAmplification        |
| NDM1           | 19A |       |       | NoAmplification        |
| nimE           | 19A |       |       | CurveFitFailed         |
| nisB           | 19A |       |       | CurveFitFailed         |
| oleC           | 19A |       |       | NoAmplification        |
| oprD           | 19A | 29.43 | 85.84 | 1.99                   |
| oprJ           | 19A | 37.77 | 85.18 | 1.75 MultipleMeltPeaks |
| pbp            | 19A | 36.89 | 76.87 | 1.89                   |
| pbp2x          | 19A | 20.51 | 75.75 | 1.98                   |
| Pbp5           | 19A |       |       | NoAmplification        |
| penA           | 19A | 34.34 | 84.02 | 1.75 MultipleMeltPeaks |
| pikR1          | 19A | 35.65 | 87.59 | 1.76 MultipleMeltPeaks |
| pikR2          | 19A | 30.28 | 84.85 | 1.79                   |
| pmrA           | 19A | 21.46 | 79.62 | 2.01                   |
| pncA           | 19A | 32.54 | 81.45 | 1.94                   |
| putative multi | 19A | 38.47 | 77.17 | 1.92 MultipleMeltPeaks |
| qac            | 19A | 39.07 | 72.51 | 1.86                   |
| qacA           | 19A |       |       | NoAmplification        |
| qacA/qacB      | 19A |       |       | NoAmplification        |
| qacEdelta1-0   | 19A |       |       | NoAmplification        |
| qacEdelta1-0   | 19A | 36.04 | 77.56 | 1.95 MultipleMeltPeaks |
| qacH-01        | 19A | 35.35 | 80.85 | 1.83 MultipleMeltPeaks |
| qacH-02        | 19A | 33.49 | 83.76 | 1.81 MultipleMeltPeaks |
| qnrA           | 19A | 38.72 | 81.31 | 1.79                   |

|              |     |       |       |      |                   |
|--------------|-----|-------|-------|------|-------------------|
| rarD-02      | 19A |       |       |      | NoAmplification   |
| sat4         | 19A |       |       |      | NoAmplification   |
| sdeB         | 19A |       |       |      | NoAmplification   |
| spcN-01      | 19A | 38.18 | 87    | 1.76 |                   |
| speA         | 19A |       |       |      | NoAmplification   |
| str          | 19A |       |       |      | NoAmplification   |
| strA         | 19A |       |       |      | NoAmplification   |
| strB         | 19A | 37.72 | 78.64 | 1.78 | MultipleMeltPeaks |
| sul1         | 19A | 34.9  | 85.77 | 1.8  | MultipleMeltPeaks |
| sul2         | 19A |       |       |      | NoAmplification   |
| sulA/foIP-01 | 19A | 21.98 | 80.73 | 2.02 |                   |
| sulA/foIP-03 | 19A | 20.39 | 83.08 | 2    |                   |
| tet(32)      | 19A |       |       |      | NoAmplification   |
| tet(34)      | 19A | 31.89 | 75.55 | 2    |                   |
| tet(35)      | 19A |       |       |      | NoAmplification   |
| tet(36)-A    | 19A | 37.36 | 81.95 | 1.8  |                   |
| tet(36)-B    | 19A | 37.97 | 78.28 | 1.84 |                   |
| tet(37)      | 19A | 31.02 | 88.07 | 1.99 | MultipleMeltPeaks |
| tetA-01      | 19A | 31.47 | 85.12 | 1.94 |                   |
| tetA-02      | 19A | 32.23 | 89.98 | 1.96 | MultipleMeltPeaks |
| tetB-01      | 19A | 31.77 | 86.12 | 1.94 | MultipleMeltPeaks |
| tetB-02      | 19A |       |       |      | NoAmplification   |
| tetC-01      | 19A |       |       |      | NoAmplification   |
| tetC-02      | 19A |       |       |      | NoAmplification   |
| tetD-01      | 19A |       |       |      | NoAmplification   |
| tetD-02      | 19A |       |       |      | NoAmplification   |
| tetE         | 19A | 39.9  | 87.42 | 1.67 | MultipleMeltPeaks |
| tetG-01      | 19A | 36.99 | 82.36 | 1.8  |                   |
| tetG-02      | 19A | 38.2  | 78.05 | 1.8  | MultipleMeltPeaks |
| tetH         | 19A |       |       |      | NoAmplification   |
| tetJ         | 19A |       |       |      | CurveFitFailed    |
| tetK         | 19A |       |       |      | NoAmplification   |
| tetL-01      | 19A |       |       |      | NoAmplification   |
| tetL-02      | 19A | 35.81 | 85.27 | 1.67 |                   |
| tetM-01      | 19A | 28.6  | 75.98 | 2    |                   |
| tetM-02      | 19A | 27.87 | 77.47 | 2.05 |                   |
| tetO-01      | 19A |       |       |      | NoAmplification   |
| tetPA        | 19A |       |       |      | NoAmplification   |
| tetPB-01     | 19A |       |       |      | CurveFitFailed    |
| tetPB-02     | 19A | 31.96 | 84.54 | 2.12 |                   |
| tetPB-03     | 19A |       |       |      | NoAmplification   |
| tetPB-05     | 19A |       |       |      | NoAmplification   |
| tetQ         | 19A |       |       |      | NoAmplification   |
| tetR-02      | 19A | 31.58 | 90.19 | 1.88 | MultipleMeltPeaks |
| tetR-03      | 19A |       |       |      | NoAmplification   |
| tetS         | 19A | 34.55 | 79.2  | 1.94 |                   |

|             |     |       |       |      |                   |
|-------------|-----|-------|-------|------|-------------------|
| tetT        | 19A |       |       |      | NoAmplification   |
| tetU-01     | 19A |       |       |      | NoAmplification   |
| tetV        | 19A |       |       |      | NoAmplification   |
| tetW-01     | 19A |       |       |      | NoAmplification   |
| tetX        | 19A |       |       |      | NoAmplification   |
| tnpA-01     | 19A | 37.14 | 83.61 | 1.87 |                   |
| tnpA-02     | 19A |       |       |      | CurveFitFailed    |
| tnpA-03     | 19A |       |       |      | CurveFitFailed    |
| tnpA-04     | 19A | 36.72 | 83.1  | 1.84 | MultipleMeltPeaks |
| tnpA-05     | 19A |       |       |      | NoAmplification   |
| tnpA-07     | 19A |       |       |      | NoAmplification   |
| tolC-01     | 19A |       |       |      | NoAmplification   |
| tolC-02     | 19A | 28.69 | 87.79 | 1.93 |                   |
| tolC-03     | 19A | 34.12 | 85.63 | 1.95 |                   |
| Tp614       | 19A | 32.71 | 83.52 | 1.99 |                   |
| ttgA        | 19A | 33.92 | 86.42 | 1.94 |                   |
| ttgB        | 19A |       |       |      | NoAmplification   |
| vanA        | 19A |       |       |      | NoAmplification   |
| vanB-01     | 19A | 34.08 | 84.66 | 1.94 |                   |
| vanC-01     | 19A |       |       |      | NoAmplification   |
| vanC-02     | 19A |       |       |      | NoAmplification   |
| vanC-03     | 19A | 25.55 | 85.94 | 1.96 | MultipleMeltPeaks |
| vanC1       | 19A |       |       |      | NoAmplification   |
| vanC2/vanC3 | 19A | 33.12 | 83.7  | 1.73 | MultipleMeltPeaks |
| vanG        | 19A |       |       |      | NoAmplification   |
| vanHB       | 19A | 36.82 | 78.54 | 1.87 |                   |
| vanHD       | 19A | 35.77 | 74.46 | 1.9  | MultipleMeltPeaks |
| vanRA-01    | 19A |       |       |      | NoAmplification   |
| vanRA-02    | 19A |       |       |      | NoAmplification   |
| vanRB       | 19A | 34.26 | 87.72 | 2.02 |                   |
| vanRC       | 19A |       |       |      | NoAmplification   |
| vanRC4      | 19A |       |       |      | NoAmplification   |
| vanRD       | 19A |       |       |      | NoAmplification   |
| vanSA       | 19A |       |       |      | NoAmplification   |
| vanSB       | 19A |       |       |      | NoAmplification   |
| vanSC-01    | 19A |       |       |      | NoAmplification   |
| vanSC-02    | 19A |       |       |      | NoAmplification   |
| vanTC-01    | 19A |       |       |      | NoAmplification   |
| vanTC-02    | 19A |       |       |      | NoAmplification   |
| vanTE       | 19A |       |       |      | NoAmplification   |
| vanTG       | 19A |       |       |      | NoAmplification   |
| vanWB       | 19A |       |       |      | CurveFitFailed    |
| vanWG       | 19A | 32.97 | 75.76 | 2    |                   |
| vanXA       | 19A |       |       |      | NoAmplification   |
| vanXB       | 19A |       |       |      | NoAmplification   |
| vanXD       | 19A | 30.77 | 75.6  | 2.09 |                   |

|              |     |       |       |      |                   |
|--------------|-----|-------|-------|------|-------------------|
| vanYB        | 19A | 35.43 | 81.72 | 1.85 | MultipleMeltPeaks |
| vanYD-01     | 19A | 30.52 | 82.3  | 1.86 | MultipleMeltPeaks |
| vanYD-02     | 19A | 36.47 | 73.95 | 1.91 |                   |
| vatB-01      | 19A |       |       |      | NoAmplification   |
| vatB-02      | 19A | 35.29 | 77.45 | 1.98 |                   |
| vatC-01      | 19A | 33.62 | 81.25 | 1.92 |                   |
| vatC-02      | 19A | 36.12 | 77.9  | 1.84 | MultipleMeltPeaks |
| vatE-01      | 19A | 30.02 | 75.66 | 2.04 |                   |
| vatE-02      | 19A |       |       |      | NoAmplification   |
| vgaA-01      | 19A |       |       |      | NoAmplification   |
| vgaA-02      | 19A |       |       |      | NoAmplification   |
| vgb-01       | 19A | 37.49 | 81.52 | 1.84 | MultipleMeltPeaks |
| vgbB-01      | 19A |       |       |      | NoAmplification   |
| vgbB-02      | 19A |       |       |      | NoAmplification   |
| yceE/mdtG-0  | 19A |       |       |      | NoAmplification   |
| yceE/mdtG-0  | 19A | 36.06 | 80.88 | 1.87 |                   |
| yceL/mdtH-0  | 19A | 32.45 | 86.4  | 1.9  |                   |
| yceL/mdtH-0  | 19A |       |       |      | NoAmplification   |
| yceL/mdtH-0  | 19A | 36.98 | 84.92 | 1.74 |                   |
| yidY/mdtL-01 | 19A | 35.38 | 82.58 | 1.91 | MultipleMeltPeaks |
| yidY/mdtL-02 | 19A |       |       |      | CurveFitFailed    |































| Assay          | Sample | Ct | Tm    | Efficiency | flag                         |
|----------------|--------|----|-------|------------|------------------------------|
| 16S rRNA       | 19B    |    | 14.69 | 81.1       | 2.09                         |
| aac            | 19B    |    | 31.19 | 83.93      | 1.59 MultipleMeltPeaks       |
| aac(6')-Ib(akz | 19B    |    |       |            | LowEfficiency, CtIsSmall, Ci |
| aac(6')-Ib(akz | 19B    |    | 31.54 | 87.1       | 2.04                         |
| aac(6')-Ib(akz | 19B    |    | 31.84 | 78.72      | 2.06 MultipleMeltPeaks       |
| aac(6')-II     | 19B    |    |       |            | CurveFitFailed               |
| aac(6')I1      | 19B    |    |       |            | CurveFitFailed               |
| aacA/aphD      | 19B    |    |       |            | LowEfficiency, CtIsSmall, Ci |
| aacC           | 19B    |    | 30.4  | 92.06      | 1.94                         |
| aacC1          | 19B    |    |       |            | LowEfficiency, CtIsSmall, Ci |
| aacC2          | 19B    |    |       |            | LowEfficiency, CtIsSmall, Ci |
| aacC4          | 19B    |    | 34.43 | 92.56      | 1.96 MultipleMeltPeaks       |
| aadA-01        | 19B    |    |       |            | LowEfficiency, CtIsSmall, Ci |
| aadA-02        | 19B    |    |       |            | LowEfficiency, CtIsSmall, Ci |
| aadA-1-01      | 19B    |    | 36.79 | 81.21      | 1.86 MultipleMeltPeaks       |
| aadA-1-02      | 19B    |    |       |            | LowEfficiency, CtIsSmall, Ci |
| aadA1          | 19B    |    | 32.24 | 83.1       | 2.13                         |
| aadA2-01       | 19B    |    |       |            | CurveFitFailed               |
| aadA2-02       | 19B    |    | 33.33 | 74.8       | 1.96                         |
| aadA2-03       | 19B    |    |       |            | LowEfficiency, CtIsSmall, Ci |
| aadA5-01       | 19B    |    | 34.69 | 81.44      | 1.99                         |
| aadA5-02       | 19B    |    | 35.42 | 83.58      | 2.11                         |
| aadA9-01       | 19B    |    |       |            | CurveFitFailed               |
| aadA9-02       | 19B    |    |       |            | LowEfficiency, CtIsSmall, S: |
| aadD           | 19B    |    |       |            | CurveFitFailed               |
| aadE           | 19B    |    |       |            | LowEfficiency, CtIsSmall, Ci |
| acrA-01        | 19B    |    | 30.77 | 88.75      | 2.04                         |
| acrA-02        | 19B    |    |       |            | LowEfficiency, CtIsSmall, S: |
| acrA-03        | 19B    |    |       |            | CurveFitFailed               |
| acrA-04        | 19B    |    | 31.92 | 80.45      | 1.93                         |
| acrA-05        | 19B    |    | 29.99 | 79.98      | 2.04 MultipleMeltPeaks       |
| acrB-01        | 19B    |    |       |            | LowEfficiency, CtIsSmall, S: |
| acrF           | 19B    |    | 27.06 | 82.84      | 1.64                         |
| acrR-01        | 19B    |    | 35.71 | 87.89      | 1.88 MultipleMeltPeaks       |
| acrR-02        | 19B    |    | 33.7  | 81.93      | 2 MultipleMeltPeaks          |
| Actin          | 19B    |    | 19.36 | 87.06      | 2.04                         |
| adeA           | 19B    |    |       |            | CurveFitFailed               |
| ampC-01        | 19B    |    | 32.18 | 78.05      | 1.89 MultipleMeltPeaks       |
| ampC-02        | 19B    |    |       |            | CurveFitFailed               |
| ampC-04        | 19B    |    | 33.8  | 78.28      | 1.91                         |
| ampC-05        | 19B    |    |       |            | LowEfficiency, CtIsSmall, Ci |
| ampC-06        | 19B    |    |       |            | CurveFitFailed               |
| ampC-07        | 19B    |    | 34.35 | 88.22      | 1.9                          |
| ampC-09        | 19B    |    |       |            | LowEfficiency, CtIsSmall, Ci |
| ampC/blaDH     | 19B    |    | 31.38 | 87.06      | 1.85                         |

|                          |     |       |       |      |                                          |
|--------------------------|-----|-------|-------|------|------------------------------------------|
| aph                      | 19B |       |       |      | LowEfficiency, CtIsSmall, Ci             |
| aph(2')-Id-01            | 19B |       |       |      | LowEfficiency, CtIsSmall, Ci             |
| aph(2')-Id-02            | 19B |       |       |      | LowEfficiency, CtIsSmall, Ci             |
| aph6ia                   | 19B |       |       |      | CurveFitFailed                           |
| aphA1(aka k <sub>z</sub> | 19B |       |       |      | LowEfficiency, CtIsSmall, Ci             |
| bacA-01                  | 19B | 34.63 | 74.38 | 1.94 | MultipleMeltPeaks                        |
| bacA-02                  | 19B |       |       |      | CurveFitFailed                           |
| BETA-globin              | 19B | 20.32 | 84.1  | 2    |                                          |
| bla-ACC-1                | 19B |       |       |      | LowEfficiency, CtIsSmall, S <sub>e</sub> |
| bla-L1                   | 19B | 30.16 | 85.37 | 2.07 | MultipleMeltPeaks                        |
| bla1                     | 19B |       |       |      | LowEfficiency, CtIsSmall, Ci             |
| blaCMY                   | 19B |       |       |      | CurveFitFailed                           |
| blaCMY2-01               | 19B |       |       |      | CurveFitFailed                           |
| blaCMY2-02               | 19B | 29.16 | 89.44 | 1.98 | MultipleMeltPeaks                        |
| blaCTX-M-01              | 19B |       |       |      | CurveFitFailed                           |
| blaCTX-M-02              | 19B |       |       |      | CurveFitFailed                           |
| blaCTX-M-03              | 19B |       |       |      | LowEfficiency, CtIsSmall, Ci             |
| blaCTX-M-04              | 19B |       |       |      | BadR2, LowEfficiency, CtIsS              |
| blaCTX-M-05              | 19B | 36.81 | 74.98 | 1.69 | MultipleMeltPeaks                        |
| blaCTX-M-06              | 19B |       |       |      | LowEfficiency, CtIsSmall, S <sub>e</sub> |
| blaGES                   | 19B |       |       |      | LowEfficiency, CtIsSmall, Ci             |
| blaIMP-01                | 19B |       |       |      | LowEfficiency, CtIsSmall, Ci             |
| blaIMP-02                | 19B |       |       |      | BadR2, LowEfficiency, CtIsS              |
| blaMOX/blaC              | 19B |       |       |      | LowEfficiency, CtIsSmall, Ci             |
| blaOCH                   | 19B |       |       |      | NoAmplification                          |
| blaOKP                   | 19B |       |       |      | NoAmplification                          |
| blaOXA1/blaC             | 19B |       |       |      | LowEfficiency, CtIsSmall, Ci             |
| blaOXA10-01              | 19B |       |       |      | LowEfficiency, CtIsSmall, S <sub>e</sub> |
| blaOXA10-02              | 19B |       |       |      | LowEfficiency, CtIsSmall, Ci             |
| blaOXY                   | 19B |       |       |      | CurveFitFailed                           |
| blaPAO                   | 19B |       |       |      | LowEfficiency, CtIsSmall, Ci             |
| blaPER                   | 19B |       |       |      | LowEfficiency, CtIsSmall, Ci             |
| blaPSE                   | 19B |       |       |      | LowEfficiency, CtIsSmall, Ci             |
| blaROB                   | 19B |       |       |      | NoAmplification                          |
| blaSFO                   | 19B | 32.78 | 80.14 | 1.86 | MultipleMeltPeaks                        |
| blaSHV-01                | 19B |       |       |      | CurveFitFailed                           |
| blaSHV-02                | 19B |       |       |      | BadR2, LowEfficiency, CtIsS              |
| blaTEM                   | 19B |       |       |      | NoAmplification                          |
| blaTLA                   | 19B |       |       |      | LowEfficiency, CtIsSmall, Ci             |
| blaVEB                   | 19B |       |       |      | LowEfficiency, CtIsSmall, Ci             |
| blaVIM                   | 19B |       |       |      | LowEfficiency, CtIsSmall, Ci             |
| blaZ                     | 19B | 29.84 | 73.03 | 1.64 |                                          |
| carB                     | 19B |       |       |      | LowEfficiency, CtIsSmall, Ci             |
| catA1                    | 19B |       |       |      | NoAmplification                          |
| catB3                    | 19B | 32.96 | 87.54 | 2.01 |                                          |
| catB8                    | 19B | 29.05 | 87.2  | 2.03 | MultipleMeltPeaks                        |

|            |     |       |       |      |                              |
|------------|-----|-------|-------|------|------------------------------|
| ceoA       | 19B | 29.56 | 82.01 | 1.97 | MultipleMeltPeaks            |
| cepA       | 19B |       |       |      | LowEfficiency, CtIsSmall, S: |
| cfiA       | 19B | 29.54 | 88.25 | 1.96 |                              |
| cfr        | 19B |       |       |      | LowEfficiency, CtIsSmall, Ci |
| cfxA       | 19B | 28.92 | 77.14 | 1.78 |                              |
| cmeA       | 19B |       |       |      | CurveFitFailed               |
| cmlA1-01   | 19B |       |       |      | LowEfficiency, CtIsSmall, Ci |
| cmlA1-02   | 19B |       |       |      | BadR2, LowEfficiency, CtIsS  |
| cmr        | 19B |       |       |      | LowEfficiency, CtIsSmall, Ci |
| cmx(A)     | 19B |       |       |      | CurveFitFailed               |
| cphA-01    | 19B | 32.84 | 84.73 | 1.81 |                              |
| cphA-02    | 19B | 28.62 | 81.18 | 1.99 |                              |
| dfrA1      | 19B |       |       |      | CurveFitFailed               |
| dfrA12     | 19B |       |       |      | CurveFitFailed               |
| emrD       | 19B |       |       |      | LowEfficiency, CtIsSmall, Ci |
| ereA       | 19B |       |       |      | CurveFitFailed               |
| ereB       | 19B | 33.65 | 88.41 | 2.29 |                              |
| erm(34)    | 19B |       |       |      | LowEfficiency, CtIsSmall, Ci |
| erm(35)    | 19B |       |       |      | LowEfficiency, CtIsSmall, Ci |
| erm(36)    | 19B |       |       |      | LowEfficiency, CtIsSmall, Ci |
| ermA       | 19B |       |       |      | LowEfficiency, CtIsSmall, Ci |
| ermA/ermTR | 19B |       |       |      | NoAmplification              |
| ermB       | 19B | 24.47 | 74.73 | 1.99 |                              |
| ermC       | 19B |       |       |      | LowEfficiency, CtIsSmall, Ci |
| ermF       | 19B | 27.75 | 74.03 | 1.98 |                              |
| ermJ/ermD  | 19B |       |       |      | LowEfficiency, CtIsSmall, Ci |
| ermK-01    | 19B |       |       |      | BadR2, LowEfficiency, CtIsS  |
| ermK-02    | 19B |       |       |      | CurveFitFailed               |
| ermT-01    | 19B |       |       |      | LowEfficiency, CtIsSmall, Ci |
| ermT-02    | 19B |       |       |      | CurveFitFailed               |
| ermX       | 19B | 34.71 | 87.02 | 1.84 | MultipleMeltPeaks            |
| ermY       | 19B |       |       |      | LowEfficiency, CtIsSmall, Ci |
| fabK       | 19B | 29.63 | 79.06 | 1.61 |                              |
| floR       | 19B |       |       |      | LowEfficiency, CtIsSmall, S: |
| folA       | 19B |       |       |      | CurveFitFailed               |
| fosB       | 19B |       |       |      | LowEfficiency, CtIsSmall, S: |
| fosX       | 19B |       |       |      | CurveFitFailed               |
| fox5       | 19B | 29.12 | 86.01 | 1.71 |                              |
| imiR       | 19B |       |       |      | LowEfficiency, CtIsSmall, Ci |
| ImrA-01    | 19B |       |       |      | CurveFitFailed               |
| intl       | 19B |       |       |      | CurveFitFailed               |
| intl1      | 19B | 20.18 | 87.24 | 2.14 |                              |
| IS613      | 19B |       |       |      | LowEfficiency, CtIsSmall, Ci |
| lnuA-01    | 19B |       |       |      | CurveFitFailed               |
| lnuB-01    | 19B |       |       |      | LowEfficiency, CtIsSmall, Ci |
| lnuB-02    | 19B | 34.7  | 86.65 | 1.99 |                              |

|                |     |       |       |      |                              |
|----------------|-----|-------|-------|------|------------------------------|
| lnuC           | 19B | 33.02 | 87.52 | 1.82 |                              |
| marR-01        | 19B | 33.52 | 79.82 | 1.94 | MultipleMeltPeaks            |
| matA/mel       | 19B | 22.17 | 77.36 | 2.11 |                              |
| mdet1          | 19B |       |       |      | LowEfficiency, CtIsSmall, Ci |
| mdtA           | 19B |       |       |      | CurveFitFailed               |
| mdtE/yhiU      | 19B | 34.85 | 84.04 | 1.99 |                              |
| mecA           | 19B |       |       |      | LowEfficiency, CtIsSmall, Ci |
| mefA           | 19B | 21.16 | 80.46 | 2.05 |                              |
| mepA           | 19B | 34.11 | 84.73 | 1.94 |                              |
| mexA           | 19B |       |       |      | LowEfficiency, CtIsSmall, S; |
| mexD           | 19B |       |       |      | LowEfficiency, CtIsSmall, S; |
| mexE           | 19B |       |       |      | LowEfficiency, CtIsSmall, S; |
| mexF           | 19B | 33.23 | 85.53 | 1.36 | MultipleMeltPeaks            |
| mphA-01        | 19B | 28.8  | 86.81 | 1.95 |                              |
| mphA-02        | 19B | 29.42 | 87    | 1.81 | MultipleMeltPeaks            |
| mphB           | 19B |       |       |      | LowEfficiency, CtIsSmall, Ci |
| mphC           | 19B |       |       |      | LowEfficiency, CtIsSmall, Ci |
| msrA-01        | 19B |       |       |      | LowEfficiency, CtIsSmall, Ci |
| msrC-01        | 19B |       |       |      | NoAmplification              |
| mtrC-01        | 19B |       |       |      | CurveFitFailed               |
| mtrC-02        | 19B |       |       |      | LowEfficiency, CtIsSmall, S; |
| mtrD-02        | 19B | 27.4  | 81.31 | 1.91 |                              |
| mtrD-03        | 19B |       |       |      | BadR2, LowEfficiency, CtIsS  |
| NDM1           | 19B |       |       |      | LowEfficiency, CtIsSmall, Ci |
| nimE           | 19B | 33.78 | 85.04 | 1.82 |                              |
| nisB           | 19B |       |       |      | LowEfficiency, CtIsSmall, Ci |
| oleC           | 19B |       |       |      | CurveFitFailed               |
| oprD           | 19B | 27.4  | 91.6  | 1.94 | MultipleMeltPeaks            |
| oprJ           | 19B |       |       |      | CurveFitFailed               |
| pbp            | 19B |       |       |      | LowEfficiency, CtIsSmall, S; |
| pbp2x          | 19B | 29.47 | 75.19 | 1.83 |                              |
| Pbp5           | 19B |       |       |      | LowEfficiency, CtIsSmall, Ci |
| penA           | 19B | 35.62 | 84.76 | 1.88 | MultipleMeltPeaks            |
| pikR1          | 19B | 32.41 | 89.25 | 1.79 |                              |
| pikR2          | 19B | 30.54 | 84.22 | 1.93 | MultipleMeltPeaks            |
| pmrA           | 19B | 29.13 | 78.48 | 2.06 |                              |
| pncA           | 19B | 31.35 | 88.73 | 2.03 |                              |
| putative multi | 19B |       |       |      | LowEfficiency, CtIsSmall, S; |
| qac            | 19B |       |       |      | LowEfficiency, CtIsSmall, S; |
| qacA           | 19B |       |       |      | LowEfficiency, CtIsSmall, Ci |
| qacA/qacB      | 19B |       |       |      | LowEfficiency, CtIsSmall, Ci |
| qacEdelta1-0   | 19B |       |       |      | LowEfficiency, CtIsSmall, Ci |
| qacEdelta1-0   | 19B |       |       |      | LowEfficiency, CtIsSmall, S; |
| qacH-01        | 19B | 32.73 | 91.05 | 1.76 |                              |
| qacH-02        | 19B |       |       |      | CurveFitFailed               |
| qnrA           | 19B |       |       |      | CurveFitFailed               |



|              |     |       |       |      |                              |
|--------------|-----|-------|-------|------|------------------------------|
| rarD-02      | 19B |       |       |      | BadR2, LowEfficiency, CtIsS  |
| sat4         | 19B |       |       |      | LowEfficiency, CtIsSmall, Ci |
| sdeB         | 19B |       |       |      | LowEfficiency, CtIsSmall, Ci |
| spcN-01      | 19B | 33.16 | 86.63 | 1.89 |                              |
| speA         | 19B |       |       |      | LowEfficiency, CtIsSmall, Ci |
| str          | 19B |       |       |      | LowEfficiency, CtIsSmall, Ci |
| strA         | 19B |       |       |      | LowEfficiency, CtIsSmall, Ci |
| strB         | 19B | 34.74 | 78.75 | 1.96 | MultipleMeltPeaks            |
| sul1         | 19B | 34.95 | 85.95 | 1.85 | MultipleMeltPeaks            |
| sul2         | 19B |       |       |      | CurveFitFailed               |
| sulA/foIP-01 | 19B | 24.91 | 80.76 | 2    |                              |
| sulA/foIP-03 | 19B | 25.8  | 82.42 | 1.98 |                              |
| tet(32)      | 19B |       |       |      | LowEfficiency, CtIsSmall, Ci |
| tet(34)      | 19B | 33.01 | 75.25 | 2.01 |                              |
| tet(35)      | 19B |       |       |      | BadR2, LowEfficiency, CtIsS  |
| tet(36)-A    | 19B |       |       |      | CurveFitFailed               |
| tet(36)-B    | 19B |       |       |      | LowEfficiency, CtIsSmall, Ci |
| tet(37)      | 19B | 30.79 | 86.79 | 2    |                              |
| tetA-01      | 19B | 31.53 | 85.11 | 2    |                              |
| tetA-02      | 19B |       |       |      | CurveFitFailed               |
| tetB-01      | 19B | 31.55 | 86.09 | 1.86 | MultipleMeltPeaks            |
| tetB-02      | 19B |       |       |      | LowEfficiency, CtIsSmall, Ci |
| tetC-01      | 19B |       |       |      | NoAmplification              |
| tetC-02      | 19B |       |       |      | LowEfficiency, CtIsSmall, Ci |
| tetD-01      | 19B |       |       |      | LowEfficiency, CtIsSmall, Ci |
| tetD-02      | 19B |       |       |      | LowEfficiency, CtIsSmall, Ci |
| tetE         | 19B |       |       |      | LowEfficiency, CtIsSmall, Ci |
| tetG-01      | 19B |       |       |      | LowEfficiency, CtIsSmall, S  |
| tetG-02      | 19B | 33.47 | 89.82 | 1.96 |                              |
| tetH         | 19B |       |       |      | LowEfficiency, CtIsSmall, Ci |
| tetJ         | 19B |       |       |      | LowEfficiency, CtIsSmall, Ci |
| tetK         | 19B |       |       |      | LowEfficiency, CtIsSmall, Ci |
| tetL-01      | 19B |       |       |      | LowEfficiency, CtIsSmall, Ci |
| tetL-02      | 19B | 29.89 | 78.45 | 1.97 |                              |
| tetM-01      | 19B | 23.13 | 75.9  | 2.03 |                              |
| tetM-02      | 19B | 22.97 | 77.36 | 2.1  |                              |
| tetO-01      | 19B | 21.7  | 76.62 | 2.02 |                              |
| tetPA        | 19B |       |       |      | LowEfficiency, CtIsSmall, Ci |
| tetPB-01     | 19B |       |       |      | LowEfficiency, CtIsSmall, Ci |
| tetPB-02     | 19B | 31.1  | 84.69 | 1.87 |                              |
| tetPB-03     | 19B |       |       |      | CurveFitFailed               |
| tetPB-05     | 19B |       |       |      | LowEfficiency, CtIsSmall, Ci |
| tetQ         | 19B |       |       |      | LowEfficiency, CtIsSmall, Ci |
| tetR-02      | 19B | 32.71 | 90.18 | 1.72 | MultipleMeltPeaks            |
| tetR-03      | 19B |       |       |      | LowEfficiency, CtIsSmall, Ci |
| tetS         | 19B |       |       |      | CurveFitFailed               |

|             |     |       |       |      |                              |
|-------------|-----|-------|-------|------|------------------------------|
| tetT        | 19B |       |       |      | LowEfficiency, CtIsSmall, Ci |
| tetU-01     | 19B |       |       |      | LowEfficiency, CtIsSmall, Ci |
| tetV        | 19B |       |       |      | CurveFitFailed               |
| tetW-01     | 19B | 22.92 | 81.92 | 2.05 |                              |
| tetX        | 19B |       |       |      | LowEfficiency, CtIsSmall, Ci |
| tnpA-01     | 19B |       |       |      | CurveFitFailed               |
| tnpA-02     | 19B |       |       |      | CurveFitFailed               |
| tnpA-03     | 19B | 32.36 | 74.89 | 2.03 |                              |
| tnpA-04     | 19B |       |       |      | CurveFitFailed               |
| tnpA-05     | 19B |       |       |      | LowEfficiency, CtIsSmall, Ci |
| tnpA-07     | 19B |       |       |      | LowEfficiency, CtIsSmall, Ci |
| tolC-01     | 19B |       |       |      | BadR2, LowEfficiency, CtIsS  |
| tolC-02     | 19B | 30.7  | 83.61 | 1.94 | MultipleMeltPeaks            |
| tolC-03     | 19B | 34.04 | 84.74 | 1.89 |                              |
| Tp614       | 19B |       |       |      | CurveFitFailed               |
| ttgA        | 19B | 34.52 | 79.78 | 1.89 |                              |
| ttgB        | 19B |       |       |      | CurveFitFailed               |
| vanA        | 19B |       |       |      | LowEfficiency, CtIsSmall, Ci |
| vanB-01     | 19B | 32.93 | 81.98 | 1.82 |                              |
| vanC-01     | 19B |       |       |      | CurveFitFailed               |
| vanC-02     | 19B |       |       |      | LowEfficiency, CtIsSmall, Ci |
| vanC-03     | 19B | 26.31 | 85.53 | 1.98 | MultipleMeltPeaks            |
| vanC1       | 19B |       |       |      | LowEfficiency, CtIsSmall, Ci |
| vanC2/vanC3 | 19B |       |       |      | CurveFitFailed               |
| vanG        | 19B |       |       |      | LowEfficiency, CtIsSmall, Ci |
| vanHB       | 19B |       |       |      | CurveFitFailed               |
| vanHD       | 19B |       |       |      | BadR2, LowEfficiency, CtIsS  |
| vanRA-01    | 19B |       |       |      | LowEfficiency, CtIsSmall, Ci |
| vanRA-02    | 19B |       |       |      | LowEfficiency, CtIsSmall, Ci |
| vanRB       | 19B |       |       |      | BadR2, LowEfficiency, CtIsS  |
| vanRC       | 19B |       |       |      | LowEfficiency, CtIsSmall, Ci |
| vanRC4      | 19B |       |       |      | LowEfficiency, CtIsSmall, Ci |
| vanRD       | 19B |       |       |      | LowEfficiency, CtIsSmall, Ci |
| vanSA       | 19B |       |       |      | LowEfficiency, CtIsSmall, S: |
| vanSB       | 19B |       |       |      | LowEfficiency, CtIsSmall, Ci |
| vanSC-01    | 19B |       |       |      | CurveFitFailed               |
| vanSC-02    | 19B |       |       |      | LowEfficiency, CtIsSmall, Ci |
| vanTC-01    | 19B |       |       |      | LowEfficiency, CtIsSmall, Ci |
| vanTC-02    | 19B |       |       |      | LowEfficiency, CtIsSmall, Ci |
| vanTE       | 19B |       |       |      | CurveFitFailed               |
| vanTG       | 19B |       |       |      | LowEfficiency, CtIsSmall, Ci |
| vanWB       | 19B |       |       |      | LowEfficiency, CtIsSmall, Ci |
| vanWG       | 19B |       |       |      | CurveFitFailed               |
| vanXA       | 19B |       |       |      | CurveFitFailed               |
| vanXB       | 19B |       |       |      | LowEfficiency, CtIsSmall, Ci |
| vanXD       | 19B | 30.59 | 75.04 | 2.08 |                              |

|              |     |       |       |      |                              |
|--------------|-----|-------|-------|------|------------------------------|
| vanYB        | 19B |       |       |      | CurveFitFailed               |
| vanYD-01     | 19B | 31.08 | 88.6  | 1.73 |                              |
| vanYD-02     | 19B |       |       |      | CurveFitFailed               |
| vatB-01      | 19B |       |       |      | LowEfficiency, CtIsSmall, Ci |
| vatB-02      | 19B |       |       |      | CurveFitFailed               |
| vatC-01      | 19B | 30.92 | 81.29 | 1.92 |                              |
| vatC-02      | 19B | 33.45 | 86.64 | 1.9  |                              |
| vatE-01      | 19B | 32.39 | 75.62 | 1.96 |                              |
| vatE-02      | 19B |       |       |      | LowEfficiency, CtIsSmall, Ci |
| vgaA-01      | 19B |       |       |      | LowEfficiency, CtIsSmall, Ci |
| vgaA-02      | 19B |       |       |      | CurveFitFailed               |
| vgb-01       | 19B |       |       |      | CurveFitFailed               |
| vgbB-01      | 19B |       |       |      | CurveFitFailed               |
| vgbB-02      | 19B |       |       |      | LowEfficiency, CtIsSmall, Ci |
| yceE/mdtG-0  | 19B |       |       |      | LowEfficiency, CtIsSmall, S  |
| yceE/mdtG-0  | 19B |       |       |      | BadR2, LowEfficiency, CtIsS  |
| yceL/mdtH-0  | 19B | 33.06 | 84.29 | 1.93 |                              |
| yceL/mdtH-0  | 19B |       |       |      | LowEfficiency, CtIsSmall, Ci |
| yceL/mdtH-0  | 19B |       |       |      | CurveFitFailed               |
| yidY/mdtL-01 | 19B | 29.99 | 83.67 | 1.77 | MultipleMeltPeaks            |
| yidY/mdtL-02 | 19B |       |       |      | LowEfficiency, CtIsSmall, Ci |































| Assay           | Sample | Ct | Tm    | Efficiency | flag                         |
|-----------------|--------|----|-------|------------|------------------------------|
| 16S rRNA        | 19C    |    | 16.21 | 81.69      | 2.08                         |
| aac             | 19C    |    | 31.55 | 78.17      | 1.69 MultipleMeltPeaks       |
| aac(6')-Ib(akz) | 19C    |    |       |            | LowEfficiency, CtIsSmall, Ct |
| aac(6')-Ib(akz) | 19C    |    | 32.03 | 86.27      | 2 MultipleMeltPeaks          |
| aac(6')-Ib(akz) | 19C    |    | 34.03 | 77.36      | 2 MultipleMeltPeaks          |
| aac(6')-II      | 19C    |    |       |            | LowEfficiency, CtIsSmall, S; |
| aac(6')I1       | 19C    |    |       |            | LowEfficiency, CtIsSmall, Ct |
| aacA/aphD       | 19C    |    |       |            | LowEfficiency, CtIsSmall, S; |
| aacC            | 19C    |    | 31.41 | 91.88      | 1.75                         |
| aacC1           | 19C    |    |       |            | LowEfficiency, CtIsSmall, Ct |
| aacC2           | 19C    |    |       |            | LowEfficiency, CtIsSmall, Ct |
| aacC4           | 19C    |    | 32.66 | 83.64      | 1.99 MultipleMeltPeaks       |
| aadA-01         | 19C    |    |       |            | LowEfficiency, CtIsSmall, Ct |
| aadA-02         | 19C    |    | 28.61 | 82.04      | 1.94                         |
| aadA-1-01       | 19C    |    |       |            | NoAmplification              |
| aadA-1-02       | 19C    |    |       |            | CurveFitFailed               |
| aadA1           | 19C    |    |       |            | CurveFitFailed               |
| aadA2-01        | 19C    |    |       |            | LowEfficiency, CtIsSmall, Ct |
| aadA2-02        | 19C    |    | 32.47 | 75.03      | 1.86                         |
| aadA2-03        | 19C    |    |       |            | CurveFitFailed               |
| aadA5-01        | 19C    |    |       |            | LowEfficiency, CtIsSmall, S; |
| aadA5-02        | 19C    |    |       |            | LowEfficiency, CtIsSmall, Ct |
| aadA9-01        | 19C    |    |       |            | LowEfficiency, CtIsSmall, S; |
| aadA9-02        | 19C    |    |       |            | BadR2, LowEfficiency, CtIsS  |
| aadD            | 19C    |    |       |            | LowEfficiency, CtIsSmall, S; |
| aadE            | 19C    |    |       |            | CurveFitFailed               |
| acrA-01         | 19C    |    | 35.9  | 88.73      | 1.87                         |
| acrA-02         | 19C    |    |       |            | LowEfficiency, CtIsSmall, S; |
| acrA-03         | 19C    |    |       |            | LowEfficiency, CtIsSmall, S; |
| acrA-04         | 19C    |    | 34.97 | 80.39      | 2.01                         |
| acrA-05         | 19C    |    | 31.15 | 90.79      | 1.99                         |
| acrB-01         | 19C    |    | 37.78 | 75.88      | 1.96                         |
| acrF            | 19C    |    | 29.42 | 81.9       | 1.95                         |
| acrR-01         | 19C    |    |       |            | CurveFitFailed               |
| acrR-02         | 19C    |    | 33.74 | 83.16      | 1.98 MultipleMeltPeaks       |
| Actin           | 19C    |    | 20.78 | 87.1       | 1.99                         |
| adeA            | 19C    |    |       |            | LowEfficiency, CtIsSmall, S; |
| ampC-01         | 19C    |    |       |            | CurveFitFailed               |
| ampC-02         | 19C    |    |       |            | LowEfficiency, CtIsSmall, S; |
| ampC-04         | 19C    |    |       |            | CurveFitFailed               |
| ampC-05         | 19C    |    |       |            | LowEfficiency, CtIsSmall, Ct |
| ampC-06         | 19C    |    |       |            | LowEfficiency, CtIsSmall, S; |
| ampC-07         | 19C    |    |       |            | LowEfficiency, CtIsSmall, S; |
| ampC-09         | 19C    |    |       |            | LowEfficiency, CtIsSmall, Ct |
| ampC/blaDH      | 19C    |    | 32.3  | 78.43      | 1.94                         |

|                            |     |       |       |      |                              |
|----------------------------|-----|-------|-------|------|------------------------------|
| aph                        | 19C |       |       |      | LowEfficiency, CtIsSmall, S: |
| aph(2')-Id-01              | 19C |       |       |      | LowEfficiency, CtIsSmall, S: |
| aph(2')-Id-02              | 19C |       |       |      | CurveFitFailed               |
| aph6ia                     | 19C |       |       |      | LowEfficiency, CtIsSmall, S: |
| aphA1(aka k <sub>a</sub> ) | 19C |       |       |      | CurveFitFailed               |
| bacA-01                    | 19C |       |       |      | LowEfficiency, CtIsSmall, C: |
| bacA-02                    | 19C |       |       |      | CurveFitFailed               |
| BETA-globin                | 19C | 21.4  | 84.06 | 2.01 |                              |
| bla-ACC-1                  | 19C |       |       |      | LowEfficiency, CtIsSmall, S: |
| bla-L1                     | 19C | 31.6  | 82.76 | 2    | MultipleMeltPeaks            |
| bla1                       | 19C |       |       |      | CurveFitFailed               |
| blaCMY                     | 19C |       |       |      | CurveFitFailed               |
| blaCMY2-01                 | 19C |       |       |      | LowEfficiency, CtIsSmall, S: |
| blaCMY2-02                 | 19C | 29.76 | 84.4  | 1.93 |                              |
| blaCTX-M-01                | 19C |       |       |      | CurveFitFailed               |
| blaCTX-M-02                | 19C |       |       |      | CurveFitFailed               |
| blaCTX-M-03                | 19C |       |       |      | CurveFitFailed               |
| blaCTX-M-04                | 19C | 33.97 | 77.31 | 1.95 |                              |
| blaCTX-M-05                | 19C |       |       |      | NoAmplification              |
| blaCTX-M-06                | 19C |       |       |      | LowEfficiency, CtIsSmall, S: |
| blaGES                     | 19C |       |       |      | CurveFitFailed               |
| blaIMP-01                  | 19C |       |       |      | LowEfficiency, CtIsSmall, C: |
| blaIMP-02                  | 19C |       |       |      | LowEfficiency, CtIsSmall, S: |
| blaMOX/blaC                | 19C |       |       |      | NoAmplification              |
| blaOCH                     | 19C |       |       |      | NoAmplification              |
| blaOKP                     | 19C |       |       |      | NoAmplification              |
| blaOXA1/blaC               | 19C |       |       |      | CurveFitFailed               |
| blaOXA10-01                | 19C |       |       |      | LowEfficiency, CtIsSmall, C: |
| blaOXA10-02                | 19C |       |       |      | LowEfficiency, CtIsSmall, S: |
| blaOXY                     | 19C |       |       |      | LowEfficiency, CtIsSmall, S: |
| blaPAO                     | 19C |       |       |      | LowEfficiency, CtIsSmall, C: |
| blaPER                     | 19C |       |       |      | LowEfficiency, CtIsSmall, C: |
| blaPSE                     | 19C |       |       |      | LowEfficiency, CtIsSmall, C: |
| blaROB                     | 19C |       |       |      | NoAmplification              |
| blaSFO                     | 19C |       |       |      | CurveFitFailed               |
| blaSHV-01                  | 19C |       |       |      | LowEfficiency, CtIsSmall, C: |
| blaSHV-02                  | 19C |       |       |      | LowEfficiency, CtIsSmall, S: |
| blaTEM                     | 19C | 19.01 | 78.95 | 1.53 |                              |
| blaTLA                     | 19C |       |       |      | LowEfficiency, CtIsSmall, C: |
| blaVEB                     | 19C |       |       |      | LowEfficiency, CtIsSmall, C: |
| blaVIM                     | 19C |       |       |      | NoAmplification              |
| blaZ                       | 19C |       |       |      | LowEfficiency, CtIsSmall, C: |
| carB                       | 19C |       |       |      | CurveFitFailed               |
| catA1                      | 19C |       |       |      | NoAmplification              |
| catB3                      | 19C |       |       |      | CurveFitFailed               |
| catB8                      | 19C | 33.15 | 82.21 | 1.99 |                              |

|            |     |       |       |      |                              |
|------------|-----|-------|-------|------|------------------------------|
| ceoA       | 19C | 29.76 | 82.55 | 1.96 |                              |
| cepA       | 19C |       |       |      | LowEfficiency, CtIsSmall, S: |
| cfiA       | 19C | 34.72 | 85.84 | 1.72 |                              |
| cfr        | 19C |       |       |      | CurveFitFailed               |
| cfxA       | 19C | 26.22 | 77.24 | 1.75 |                              |
| cmeA       | 19C |       |       |      | LowEfficiency, CtIsSmall, S: |
| cmlA1-01   | 19C |       |       |      | LowEfficiency, CtIsSmall, S: |
| cmlA1-02   | 19C |       |       |      | CurveFitFailed               |
| cmr        | 19C |       |       |      | CurveFitFailed               |
| cmx(A)     | 19C | 28.7  | 84.87 | 1.93 | MultipleMeltPeaks            |
| cphA-01    | 19C | 29.32 | 86.37 | 1.7  |                              |
| cphA-02    | 19C | 35.55 | 82.83 | 2.01 |                              |
| dfrA1      | 19C |       |       |      | CurveFitFailed               |
| dfrA12     | 19C |       |       |      | LowEfficiency, CtIsSmall, S: |
| emrD       | 19C |       |       |      | LowEfficiency, CtIsSmall, S: |
| ereA       | 19C |       |       |      | LowEfficiency, CtIsSmall, S: |
| ereB       | 19C |       |       |      | CurveFitFailed               |
| erm(34)    | 19C |       |       |      | NoAmplification              |
| erm(35)    | 19C |       |       |      | LowEfficiency, CtIsSmall, C: |
| erm(36)    | 19C |       |       |      | LowEfficiency, CtIsSmall, C: |
| ermA       | 19C |       |       |      | LowEfficiency, CtIsSmall, C: |
| ermA/ermTR | 19C |       |       |      | NoAmplification              |
| ermB       | 19C |       |       |      | LowEfficiency, CtIsSmall, C: |
| ermC       | 19C | 33.77 | 88.63 | 1.96 |                              |
| ermF       | 19C | 29.85 | 74.02 | 2    |                              |
| ermJ/ermD  | 19C |       |       |      | LowEfficiency, CtIsSmall, S: |
| ermK-01    | 19C |       |       |      | LowEfficiency, CtIsSmall, S: |
| ermK-02    | 19C |       |       |      | LowEfficiency, CtIsSmall, C: |
| ermT-01    | 19C |       |       |      | CurveFitFailed               |
| ermT-02    | 19C |       |       |      | CurveFitFailed               |
| ermX       | 19C |       |       |      | LowEfficiency, CtIsSmall, S: |
| ermY       | 19C |       |       |      | CurveFitFailed               |
| fabK       | 19C | 20.02 | 77.3  | 1.77 |                              |
| floR       | 19C |       |       |      | NoAmplification              |
| folA       | 19C |       |       |      | NoAmplification              |
| fosB       | 19C |       |       |      | LowEfficiency, CtIsSmall, S: |
| fosX       | 19C |       |       |      | CurveFitFailed               |
| fox5       | 19C | 30.51 | 86.3  | 1.58 |                              |
| imiR       | 19C |       |       |      | NoAmplification              |
| ImrA-01    | 19C | 36.79 | 82.51 | 1.94 |                              |
| intl       | 19C | 32.6  | 84.71 | 1.84 |                              |
| intl1      | 19C | 20.91 | 87.19 | 2.09 |                              |
| IS613      | 19C |       |       |      | CurveFitFailed               |
| lnuA-01    | 19C |       |       |      | CurveFitFailed               |
| lnuB-01    | 19C |       |       |      | CurveFitFailed               |
| lnuB-02    | 19C | 29.81 | 73.66 | 2.07 |                              |

|                |     |       |       |      |                              |
|----------------|-----|-------|-------|------|------------------------------|
| lnuC           | 19C | 33.57 | 81.97 | 1.87 |                              |
| marR-01        | 19C | 33.9  | 85.42 | 1.94 |                              |
| matA/mel       | 19C | 21.8  | 77.59 | 2.08 |                              |
| mdet1          | 19C |       |       |      | LowEfficiency, CtIsSmall, Ci |
| mdtA           | 19C |       |       |      | CurveFitFailed               |
| mdtE/yhiU      | 19C | 35.66 | 76.86 | 2.04 |                              |
| mecA           | 19C |       |       |      | LowEfficiency, CtIsSmall, S: |
| mefA           | 19C | 20.98 | 80.43 | 2.02 | MultipleMeltPeaks            |
| mepA           | 19C |       |       |      | CurveFitFailed               |
| mexA           | 19C |       |       |      | CurveFitFailed               |
| mexD           | 19C | 23.32 | 79.81 | 1.68 |                              |
| mexE           | 19C | 32.1  | 81.97 | 1.87 |                              |
| mexF           | 19C | 29.83 | 81.49 | 1.62 |                              |
| mphA-01        | 19C | 31.21 | 88.72 | 1.95 |                              |
| mphA-02        | 19C | 33.07 | 76.65 | 1.7  | MultipleMeltPeaks            |
| mphB           | 19C |       |       |      | LowEfficiency, CtIsSmall, S: |
| mphC           | 19C |       |       |      | LowEfficiency, CtIsSmall, Ci |
| msrA-01        | 19C |       |       |      | LowEfficiency, CtIsSmall, Ci |
| msrC-01        | 19C |       |       |      | NoAmplification              |
| mtrC-01        | 19C |       |       |      | LowEfficiency, CtIsSmall, Ci |
| mtrC-02        | 19C |       |       |      | CurveFitFailed               |
| mtrD-02        | 19C | 27.55 | 81.47 | 1.99 |                              |
| mtrD-03        | 19C |       |       |      | NoAmplification              |
| NDM1           | 19C |       |       |      | LowEfficiency, CtIsSmall, S: |
| nimE           | 19C | 34.62 | 85.06 | 2.03 |                              |
| nisB           | 19C |       |       |      | LowEfficiency, CtIsSmall, Ci |
| oleC           | 19C | 36.36 | 88.81 | 1.87 |                              |
| oprD           | 19C | 30.02 | 86.76 | 1.97 |                              |
| oprJ           | 19C |       |       |      | LowEfficiency, CtIsSmall, Ci |
| pbp            | 19C |       |       |      | LowEfficiency, CtIsSmall, S: |
| pbp2x          | 19C | 20.39 | 75.53 | 1.77 |                              |
| Pbp5           | 19C |       |       |      | CurveFitFailed               |
| penA           | 19C |       |       |      | NoAmplification              |
| pikR1          | 19C | 33.71 | 73.86 | 1.88 |                              |
| pikR2          | 19C | 34.44 | 82.48 | 1.95 | MultipleMeltPeaks            |
| pmrA           | 19C | 20.48 | 79.65 | 1.93 |                              |
| pncA           | 19C |       |       |      | CurveFitFailed               |
| putative multi | 19C |       |       |      | CurveFitFailed               |
| qac            | 19C |       |       |      | LowEfficiency, CtIsSmall, S: |
| qacA           | 19C |       |       |      | LowEfficiency, CtIsSmall, Ci |
| qacA/qacB      | 19C |       |       |      | LowEfficiency, CtIsSmall, Ci |
| qacEdelta1-0   | 19C |       |       |      | LowEfficiency, CtIsSmall, S: |
| qacEdelta1-0   | 19C |       |       |      | CurveFitFailed               |
| qacH-01        | 19C | 30.33 | 79.8  | 1.85 |                              |
| qacH-02        | 19C |       |       |      | CurveFitFailed               |
| qnrA           | 19C |       |       |      | LowEfficiency, CtIsSmall, S: |

|              |     |       |       |      |                              |
|--------------|-----|-------|-------|------|------------------------------|
| rarD-02      | 19C |       |       |      | NoAmplification              |
| sat4         | 19C |       |       |      | CurveFitFailed               |
| sdeB         | 19C |       |       |      | LowEfficiency, CtIsSmall, S: |
| spcN-01      | 19C |       |       |      | LowEfficiency, CtIsSmall, Ci |
| speA         | 19C |       |       |      | LowEfficiency, CtIsSmall, Ci |
| str          | 19C |       |       |      | LowEfficiency, CtIsSmall, Ci |
| strA         | 19C |       |       |      | LowEfficiency, CtIsSmall, Ci |
| strB         | 19C |       |       |      | LowEfficiency, CtIsSmall, Ci |
| sul1         | 19C |       |       |      | NoAmplification              |
| sul2         | 19C | 27.99 | 85.69 | 1.81 |                              |
| sulA/foIP-01 | 19C | 19.27 | 81.28 | 2.06 |                              |
| sulA/foIP-03 | 19C | 20.08 | 83.56 | 2.02 |                              |
| tet(32)      | 19C | 26.88 | 81.1  | 2    |                              |
| tet(34)      | 19C | 31.24 | 75.65 | 1.97 |                              |
| tet(35)      | 19C |       |       |      | NoAmplification              |
| tet(36)-A    | 19C |       |       |      | LowEfficiency, CtIsSmall, S: |
| tet(36)-B    | 19C |       |       |      | CurveFitFailed               |
| tet(37)      | 19C | 27.66 | 75.85 | 1.97 | MultipleMeltPeaks            |
| tetA-01      | 19C | 31.93 | 85.13 | 1.94 |                              |
| tetA-02      | 19C | 35.96 | 77.18 | 1.93 |                              |
| tetB-01      | 19C | 36.25 | 76.84 | 1.85 |                              |
| tetB-02      | 19C |       |       |      | LowEfficiency, CtIsSmall, Ci |
| tetC-01      | 19C |       |       |      | NoAmplification              |
| tetC-02      | 19C |       |       |      | CurveFitFailed               |
| tetD-01      | 19C |       |       |      | LowEfficiency, CtIsSmall, Ci |
| tetD-02      | 19C |       |       |      | LowEfficiency, CtIsSmall, Ci |
| tetE         | 19C |       |       |      | CurveFitFailed               |
| tetG-01      | 19C | 29.86 | 85.59 | 1.74 |                              |
| tetG-02      | 19C |       |       |      | CurveFitFailed               |
| tetH         | 19C |       |       |      | LowEfficiency, CtIsSmall, Ci |
| tetJ         | 19C |       |       |      | LowEfficiency, CtIsSmall, Ci |
| tetK         | 19C |       |       |      | LowEfficiency, CtIsSmall, Ci |
| tetL-01      | 19C |       |       |      | LowEfficiency, CtIsSmall, Ci |
| tetL-02      | 19C | 34    | 78.32 | 2.02 |                              |
| tetM-01      | 19C | 25.81 | 75.65 | 2.01 |                              |
| tetM-02      | 19C | 25.31 | 77.29 | 1.99 |                              |
| tetO-01      | 19C |       |       |      | LowEfficiency, CtIsSmall, S: |
| tetPA        | 19C |       |       |      | LowEfficiency, CtIsSmall, Ci |
| tetPB-01     | 19C |       |       |      | LowEfficiency, CtIsSmall, Ci |
| tetPB-02     | 19C | 31.37 | 84.82 | 1.84 |                              |
| tetPB-03     | 19C |       |       |      | CurveFitFailed               |
| tetPB-05     | 19C |       |       |      | LowEfficiency, CtIsSmall, Ci |
| tetQ         | 19C | 27.72 | 77.02 | 2.1  |                              |
| tetR-02      | 19C |       |       |      | LowEfficiency, CtIsSmall, S: |
| tetR-03      | 19C |       |       |      | CurveFitFailed               |
| tetS         | 19C | 35.05 | 79.23 | 2.11 |                              |

|             |     |       |       |      |                                          |
|-------------|-----|-------|-------|------|------------------------------------------|
| tetT        | 19C | 33.27 | 73.92 | 2.1  |                                          |
| tetU-01     | 19C |       |       |      | LowEfficiency, CtIsSmall, S <sub>e</sub> |
| tetV        | 19C |       |       |      | LowEfficiency, CtIsSmall, S <sub>e</sub> |
| tetW-01     | 19C |       |       |      | LowEfficiency, CtIsSmall, S <sub>e</sub> |
| tetX        | 19C |       |       |      | CurveFitFailed                           |
| tnpA-01     | 19C | 30.48 | 85.87 | 1.93 |                                          |
| tnpA-02     | 19C |       |       |      | LowEfficiency, CtIsSmall, S <sub>e</sub> |
| tnpA-03     | 19C | 34.64 | 74.27 | 2.12 |                                          |
| tnpA-04     | 19C |       |       |      | LowEfficiency, CtIsSmall, S <sub>e</sub> |
| tnpA-05     | 19C | 29.7  | 80.67 | 1.91 |                                          |
| tnpA-07     | 19C |       |       |      | LowEfficiency, CtIsSmall, C <sub>i</sub> |
| tolC-01     | 19C |       |       |      | CurveFitFailed                           |
| tolC-02     | 19C | 33    | 83.58 | 1.96 |                                          |
| tolC-03     | 19C | 33.58 | 82.98 | 1.92 | MultipleMeltPeaks                        |
| Tp614       | 19C |       |       |      | LowEfficiency, CtIsSmall, S <sub>e</sub> |
| ttgA        | 19C |       |       |      | LowEfficiency, CtIsSmall, S <sub>e</sub> |
| ttgB        | 19C |       |       |      | BadR2, LowEfficiency, CtIsS              |
| vanA        | 19C |       |       |      | LowEfficiency, CtIsSmall, C <sub>i</sub> |
| vanB-01     | 19C | 31.8  | 83.8  | 1.87 |                                          |
| vanC-01     | 19C |       |       |      | CurveFitFailed                           |
| vanC-02     | 19C |       |       |      | LowEfficiency, CtIsSmall, S <sub>e</sub> |
| vanC-03     | 19C | 27.43 | 85.76 | 2    | MultipleMeltPeaks                        |
| vanC1       | 19C |       |       |      | LowEfficiency, CtIsSmall, C <sub>i</sub> |
| vanC2/vanC3 | 19C |       |       |      | LowEfficiency, CtIsSmall, S <sub>e</sub> |
| vanG        | 19C |       |       |      | LowEfficiency, CtIsSmall, C <sub>i</sub> |
| vanHB       | 19C |       |       |      | CurveFitFailed                           |
| vanHD       | 19C |       |       |      | CurveFitFailed                           |
| vanRA-01    | 19C |       |       |      | LowEfficiency, CtIsSmall, S <sub>e</sub> |
| vanRA-02    | 19C |       |       |      | LowEfficiency, CtIsSmall, C <sub>i</sub> |
| vanRB       | 19C | 34.38 | 82.07 | 2.14 | MultipleMeltPeaks                        |
| vanRC       | 19C |       |       |      | LowEfficiency, CtIsSmall, C <sub>i</sub> |
| vanRC4      | 19C |       |       |      | CurveFitFailed                           |
| vanRD       | 19C |       |       |      | LowEfficiency, CtIsSmall, C <sub>i</sub> |
| vanSA       | 19C |       |       |      | LowEfficiency, CtIsSmall, S <sub>e</sub> |
| vanSB       | 19C |       |       |      | LowEfficiency, CtIsSmall, S <sub>e</sub> |
| vanSC-01    | 19C |       |       |      | LowEfficiency, CtIsSmall, S <sub>e</sub> |
| vanSC-02    | 19C |       |       |      | LowEfficiency, CtIsSmall, S <sub>e</sub> |
| vanTC-01    | 19C |       |       |      | CurveFitFailed                           |
| vanTC-02    | 19C |       |       |      | CurveFitFailed                           |
| vanTE       | 19C |       |       |      | LowEfficiency, CtIsSmall, S <sub>e</sub> |
| vanTG       | 19C |       |       |      | LowEfficiency, CtIsSmall, S <sub>e</sub> |
| vanWB       | 19C |       |       |      | LowEfficiency, CtIsSmall, S <sub>e</sub> |
| vanWG       | 19C |       |       |      | LowEfficiency, CtIsSmall, S <sub>e</sub> |
| vanXA       | 19C |       |       |      | LowEfficiency, CtIsSmall, S <sub>e</sub> |
| vanXB       | 19C |       |       |      | LowEfficiency, CtIsSmall, C <sub>i</sub> |
| vanXD       | 19C |       |       |      | CurveFitFailed                           |

|              |     |       |       |      |                              |
|--------------|-----|-------|-------|------|------------------------------|
| vanYB        | 19C |       |       |      | CurveFitFailed               |
| vanYD-01     | 19C | 32.4  | 82.78 | 1.89 |                              |
| vanYD-02     | 19C |       |       |      | BadR2, LowEfficiency, CtIsS  |
| vatB-01      | 19C |       |       |      | LowEfficiency, CtIsSmall, Ci |
| vatB-02      | 19C |       |       |      | CurveFitFailed               |
| vatC-01      | 19C |       |       |      | CurveFitFailed               |
| vatC-02      | 19C |       |       |      | CurveFitFailed               |
| vatE-01      | 19C | 31.41 | 76.8  | 2.01 |                              |
| vatE-02      | 19C |       |       |      | NoAmplification              |
| vgaA-01      | 19C |       |       |      | LowEfficiency, CtIsSmall, Ci |
| vgaA-02      | 19C |       |       |      | LowEfficiency, CtIsSmall, S: |
| vgb-01       | 19C |       |       |      | CurveFitFailed               |
| vgbB-01      | 19C |       |       |      | LowEfficiency, CtIsSmall, S: |
| vgbB-02      | 19C |       |       |      | CurveFitFailed               |
| yceE/mdtG-0  | 19C |       |       |      | CurveFitFailed               |
| yceE/mdtG-0  | 19C |       |       |      | NoAmplification              |
| yceL/mdtH-0  | 19C | 35.17 | 79.93 | 1.82 | MultipleMeltPeaks            |
| yceL/mdtH-0  | 19C |       |       |      | LowEfficiency, CtIsSmall, Ci |
| yceL/mdtH-0  | 19C |       |       |      | CurveFitFailed               |
| yidY/mdtL-01 | 19C | 32.49 | 75.99 | 1.89 | MultipleMeltPeaks            |
| yidY/mdtL-02 | 19C |       |       |      | LowEfficiency, CtIsSmall, S: |































| Assay          | Sample | Ct | Tm    | Efficiency | flag                   |
|----------------|--------|----|-------|------------|------------------------|
| 16S rRNA       | 20A    |    | 19.5  | 82.11      | 1.95                   |
| aac            | 20A    |    | 31.16 | 82.11      | 1.55 MultipleMeltPeaks |
| aac(6')-Ib(akz | 20A    |    |       |            | NoAmplification        |
| aac(6')-Ib(akz | 20A    |    | 31.31 | 82.33      | 1.97 MultipleMeltPeaks |
| aac(6')-Ib(akz | 20A    |    | 33.38 | 87.39      | 1.9                    |
| aac(6')-II     | 20A    |    | 37.01 | 81.15      | 1.63 MultipleMeltPeaks |
| aac(6')I1      | 20A    |    | 36.29 | 88.19      | 1.78 MultipleMeltPeaks |
| aacA/aphD      | 20A    |    |       |            | NoAmplification        |
| aacC           | 20A    |    | 31.69 | 91.55      | 1.87 MultipleMeltPeaks |
| aacC1          | 20A    |    | 28.93 | 81.59      | 1.94                   |
| aacC2          | 20A    |    |       |            | NoAmplification        |
| aacC4          | 20A    |    | 34.67 | 87.23      | 1.86 MultipleMeltPeaks |
| aadA-01        | 20A    |    |       |            | NoAmplification        |
| aadA-02        | 20A    |    | 34.63 | 80.4       | 1.94                   |
| aadA-1-01      | 20A    |    | 35.03 | 76.74      | 1.8 MultipleMeltPeaks  |
| aadA-1-02      | 20A    |    |       |            | NoAmplification        |
| aadA1          | 20A    |    | 38.56 | 84.3       | 1.8                    |
| aadA2-01       | 20A    |    | 38    | 84.75      | 1.77 MultipleMeltPeaks |
| aadA2-02       | 20A    |    |       |            | NoAmplification        |
| aadA2-03       | 20A    |    |       |            | NoAmplification        |
| aadA5-01       | 20A    |    | 34.77 | 77.87      | 1.95 MultipleMeltPeaks |
| aadA5-02       | 20A    |    | 30.58 | 86.52      | 1.91                   |
| aadA9-01       | 20A    |    | 36.75 | 81.96      | 1.81 MultipleMeltPeaks |
| aadA9-02       | 20A    |    |       |            | NoAmplification        |
| aadD           | 20A    |    |       |            | NoAmplification        |
| aadE           | 20A    |    |       |            | CurveFitFailed         |
| acrA-01        | 20A    |    | 30.87 | 88.99      | 1.94                   |
| acrA-02        | 20A    |    |       |            | CurveFitFailed         |
| acrA-03        | 20A    |    | 35.33 | 81.98      | 1.86                   |
| acrA-04        | 20A    |    | 30.75 | 80.61      | 1.95                   |
| acrA-05        | 20A    |    | 31.26 | 87.81      | 1.94 MultipleMeltPeaks |
| acrB-01        | 20A    |    | 37.66 | 89.01      | 1.73                   |
| acrF           | 20A    |    | 31.94 | 82.64      | 1.95                   |
| acrR-01        | 20A    |    | 34.89 | 81.07      | 1.83 MultipleMeltPeaks |
| acrR-02        | 20A    |    | 32.54 | 86.56      | 1.98 MultipleMeltPeaks |
| Actin          | 20A    |    | 20.97 | 87.07      | 1.97                   |
| adeA           | 20A    |    |       |            | NoAmplification        |
| ampC-01        | 20A    |    | 31.79 | 85.53      | 1.91 MultipleMeltPeaks |
| ampC-02        | 20A    |    | 34.14 | 82.38      | 1.89                   |
| ampC-04        | 20A    |    | 32.22 | 78.5       | 1.81                   |
| ampC-05        | 20A    |    |       |            | NoAmplification        |
| ampC-06        | 20A    |    |       |            | NoAmplification        |
| ampC-07        | 20A    |    | 33.38 | 88.42      | 1.86                   |
| ampC-09        | 20A    |    |       |            | NoAmplification        |
| ampC/blaDH     | 20A    |    | 31.13 | 85.21      | 1.92 MultipleMeltPeaks |

|                          |     |       |       |      |                   |
|--------------------------|-----|-------|-------|------|-------------------|
| aph                      | 20A |       |       |      | NoAmplification   |
| aph(2')-Id-01            | 20A |       |       |      | NoAmplification   |
| aph(2')-Id-02            | 20A |       |       |      | NoAmplification   |
| aph6ia                   | 20A | 28.92 | 78.26 | 1.97 |                   |
| aphA1(aka k <sub>ε</sub> | 20A |       |       |      | NoAmplification   |
| bacA-01                  | 20A | 40.68 | 81.1  | 1.71 | MultipleMeltPeaks |
| bacA-02                  | 20A | 32.93 | 88.06 | 1.84 |                   |
| BETA-globin              | 20A | 21.67 | 84.05 | 2    |                   |
| bla-ACC-1                | 20A |       |       |      | CurveFitFailed    |
| bla-L1                   | 20A | 29.78 | 88.24 | 1.97 | MultipleMeltPeaks |
| bla1                     | 20A |       |       |      | NoAmplification   |
| blaCMY                   | 20A |       |       |      | NoAmplification   |
| blaCMY2-01               | 20A | 35.45 | 88.88 | 1.9  |                   |
| blaCMY2-02               | 20A | 28.92 | 82.83 | 1.97 | MultipleMeltPeaks |
| blaCTX-M-01              | 20A |       |       |      | NoAmplification   |
| blaCTX-M-02              | 20A | 33.53 | 88.71 | 1.97 | MultipleMeltPeaks |
| blaCTX-M-03              | 20A |       |       |      | NoAmplification   |
| blaCTX-M-04              | 20A | 34.05 | 88.81 | 1.95 | MultipleMeltPeaks |
| blaCTX-M-05              | 20A |       |       |      | NoAmplification   |
| blaCTX-M-06              | 20A |       |       |      | NoAmplification   |
| blaGES                   | 20A |       |       |      | NoAmplification   |
| blaIMP-01                | 20A |       |       |      | NoAmplification   |
| blaIMP-02                | 20A | 38.47 | 78.68 | 1.81 |                   |
| blaMOX/blaC              | 20A | 37.75 | 82.62 | 1.8  |                   |
| blaOCH                   | 20A |       |       |      | NoAmplification   |
| blaOKP                   | 20A |       |       |      | NoAmplification   |
| blaOXA1/blaC             | 20A |       |       |      | NoAmplification   |
| blaOXA10-01              | 20A |       |       |      | NoAmplification   |
| blaOXA10-02              | 20A |       |       |      | NoAmplification   |
| blaOXY                   | 20A | 37.33 | 86.13 | 1.68 | MultipleMeltPeaks |
| blaPAO                   | 20A |       |       |      | NoAmplification   |
| blaPER                   | 20A |       |       |      | NoAmplification   |
| blaPSE                   | 20A |       |       |      | NoAmplification   |
| blaROB                   | 20A |       |       |      | NoAmplification   |
| blaSFO                   | 20A | 33.21 | 87.72 | 1.96 |                   |
| blaSHV-01                | 20A |       |       |      | NoAmplification   |
| blaSHV-02                | 20A | 39.03 | 77.15 | 1.79 |                   |
| blaTEM                   | 20A | 33.47 | 81.66 | 1.97 | MultipleMeltPeaks |
| blaTLA                   | 20A |       |       |      | NoAmplification   |
| blaVEB                   | 20A |       |       |      | NoAmplification   |
| blaVIM                   | 20A |       |       |      | NoAmplification   |
| blaZ                     | 20A |       |       |      | NoAmplification   |
| carB                     | 20A | 38.17 | 82.37 | 1.8  |                   |
| catA1                    | 20A |       |       |      | NoAmplification   |
| catB3                    | 20A | 34.52 | 87.57 | 1.93 | MultipleMeltPeaks |
| catB8                    | 20A | 29.77 | 82.34 | 1.99 |                   |

|            |     |       |       |      |                              |
|------------|-----|-------|-------|------|------------------------------|
| ceoA       | 20A | 28.2  | 82.32 | 1.95 |                              |
| cepA       | 20A |       |       |      | NoAmplification              |
| cfiA       | 20A | 28.61 | 88.4  | 1.81 |                              |
| cfr        | 20A |       |       |      | NoAmplification              |
| cfxA       | 20A | 23.42 | 77.36 | 1.83 |                              |
| cmeA       | 20A | 36.62 | 88.79 | 1.76 |                              |
| cmlA1-01   | 20A |       |       |      | NoAmplification              |
| cmlA1-02   | 20A | 34.36 | 82.82 | 1.92 | MultipleMeltPeaks            |
| cmr        | 20A | 40.74 | 78.22 | 1.7  | MultipleMeltPeaks            |
| cmx(A)     | 20A | 26.75 | 84.14 | 1.99 | MultipleMeltPeaks            |
| cphA-01    | 20A | 34.74 | 88.97 | 1.94 |                              |
| cphA-02    | 20A | 37.68 | 82.47 | 1.79 |                              |
| dfrA1      | 20A | 34.57 | 88.44 | 1.93 |                              |
| dfrA12     | 20A | 34.43 | 77.19 | 1.87 | MultipleMeltPeaks            |
| emrD       | 20A |       |       |      | NoAmplification              |
| ereA       | 20A |       |       |      | NoAmplification              |
| ereB       | 20A | 34.65 | 88.64 | 2    | MultipleMeltPeaks            |
| erm(34)    | 20A |       |       |      | NoAmplification              |
| erm(35)    | 20A |       |       |      | NoAmplification              |
| erm(36)    | 20A | 34.26 | 87.46 | 1.94 | MultipleMeltPeaks            |
| ermA       | 20A |       |       |      | NoAmplification              |
| ermA/ermTR | 20A |       |       |      | NoAmplification              |
| ermB       | 20A |       |       |      | NoAmplification              |
| ermC       | 20A | 36.48 | 85.41 | 1.88 |                              |
| ermF       | 20A |       |       |      | NoAmplification              |
| ermJ/ermD  | 20A |       |       |      | NoAmplification              |
| ermK-01    | 20A | 37.42 | 73.31 | 1.92 |                              |
| ermK-02    | 20A | 34.21 | 87.93 | 1.9  |                              |
| ermT-01    | 20A |       |       |      | NoAmplification              |
| ermT-02    | 20A |       |       |      | NoAmplification              |
| ermX       | 20A | 38.86 | 87.34 | 1.58 | MultipleMeltPeaks            |
| ermY       | 20A |       |       |      | NoAmplification              |
| fabK       | 20A | 27.85 | 80.14 | 1.72 |                              |
| floR       | 20A |       |       |      | NoAmplification              |
| folA       | 20A |       |       |      | NoAmplification              |
| fosB       | 20A |       |       |      | LowEfficiency, CtIsSmall, S: |
| fosX       | 20A |       |       |      | NoAmplification              |
| fox5       | 20A | 28.9  | 86.23 | 1.76 |                              |
| imiR       | 20A |       |       |      | NoAmplification              |
| ImrA-01    | 20A | 34.12 | 82.38 | 1.97 | MultipleMeltPeaks            |
| intl       | 20A | 29.73 | 84.65 | 1.94 |                              |
| intl1      | 20A | 19.87 | 87.58 | 1.97 |                              |
| IS613      | 20A | 33.37 | 80.35 | 1.98 |                              |
| lnuA-01    | 20A |       |       |      | NoAmplification              |
| lnuB-01    | 20A |       |       |      | NoAmplification              |
| lnuB-02    | 20A |       |       |      | NoAmplification              |

|               |     |       |       |      |                   |
|---------------|-----|-------|-------|------|-------------------|
| lnuC          | 20A | 32.86 | 86.82 | 1.92 |                   |
| marR-01       | 20A | 32.93 | 85.27 | 1.93 |                   |
| matA/mel      | 20A | 22.65 | 77.64 | 2.04 |                   |
| mdet1         | 20A |       |       |      | NoAmplification   |
| mdtA          | 20A | 34.14 | 84.96 | 1.81 |                   |
| mdtE/yhiU     | 20A | 36.6  | 84.22 | 1.9  |                   |
| mecA          | 20A |       |       |      | NoAmplification   |
| mefA          | 20A | 21.98 | 80.48 | 1.97 |                   |
| mepA          | 20A | 31.82 | 78.02 | 1.99 | MultipleMeltPeaks |
| mexA          | 20A |       |       |      | NoAmplification   |
| mexD          | 20A | 35.55 | 79.6  | 1.85 | MultipleMeltPeaks |
| mexE          | 20A |       |       |      | NoAmplification   |
| mexF          | 20A | 29.3  | 89.99 | 1.69 | MultipleMeltPeaks |
| mphA-01       | 20A | 28.09 | 86.77 | 2.02 |                   |
| mphA-02       | 20A | 27.76 | 86.72 | 1.87 |                   |
| mphB          | 20A | 34.84 | 88.67 | 1.92 | MultipleMeltPeaks |
| mphC          | 20A |       |       |      | NoAmplification   |
| msrA-01       | 20A |       |       |      | NoAmplification   |
| msrC-01       | 20A |       |       |      | NoAmplification   |
| mtrC-01       | 20A |       |       |      | NoAmplification   |
| mtrC-02       | 20A | 35.06 | 84.05 | 1.95 |                   |
| mtrD-02       | 20A | 29.33 | 81.45 | 1.87 |                   |
| mtrD-03       | 20A |       |       |      | NoAmplification   |
| NDM1          | 20A |       |       |      | NoAmplification   |
| nimE          | 20A | 38.53 | 84.89 | 1.85 | MultipleMeltPeaks |
| nisB          | 20A | 38.85 | 82.99 | 1.76 |                   |
| oleC          | 20A | 35.9  | 80.83 | 1.86 |                   |
| oprD          | 20A | 30.18 | 81.97 | 1.9  | MultipleMeltPeaks |
| oprJ          | 20A | 34.01 | 91.15 | 1.85 |                   |
| pbp           | 20A |       |       |      | NoAmplification   |
| pbp2x         | 20A |       |       |      | NoAmplification   |
| Pbp5          | 20A |       |       |      | NoAmplification   |
| penA          | 20A | 35.39 | 87.93 | 1.75 |                   |
| pikR1         | 20A |       |       |      | NoAmplification   |
| pikR2         | 20A | 31.46 | 84.76 | 1.99 |                   |
| pmrA          | 20A | 28.83 | 78.91 | 2    |                   |
| pncA          | 20A | 33.22 | 79.52 | 1.84 |                   |
| putative mulI | 20A | 31.62 | 83.96 | 1.94 |                   |
| qac           | 20A | 35.62 | 85.01 | 1.82 |                   |
| qacA          | 20A |       |       |      | NoAmplification   |
| qacA/qacB     | 20A |       |       |      | NoAmplification   |
| qacEdelta1-0  | 20A |       |       |      | NoAmplification   |
| qacEdelta1-0  | 20A | 36.29 | 75    | 1.92 |                   |
| qacH-01       | 20A | 31.63 | 82.28 | 1.85 | MultipleMeltPeaks |
| qacH-02       | 20A | 34.48 | 83.67 | 1.71 | MultipleMeltPeaks |
| qnrA          | 20A | 34.81 | 73.34 | 2.04 |                   |



|              |     |       |       |      |                   |
|--------------|-----|-------|-------|------|-------------------|
| rarD-02      | 20A |       |       |      | NoAmplification   |
| sat4         | 20A |       |       |      | NoAmplification   |
| sdeB         | 20A |       |       |      | NoAmplification   |
| spcN-01      | 20A | 37.93 | 83.92 | 1.76 |                   |
| speA         | 20A |       |       |      | NoAmplification   |
| str          | 20A |       |       |      | NoAmplification   |
| strA         | 20A |       |       |      | NoAmplification   |
| strB         | 20A |       |       |      | NoAmplification   |
| sul1         | 20A |       |       |      | NoAmplification   |
| sul2         | 20A |       |       |      | NoAmplification   |
| sulA/foIP-01 | 20A | 24.89 | 81.31 | 1.96 |                   |
| sulA/foIP-03 | 20A | 25.54 | 83.73 | 1.99 |                   |
| tet(32)      | 20A | 27.07 | 81.19 | 1.98 |                   |
| tet(34)      | 20A | 29.46 | 76.03 | 2.02 |                   |
| tet(35)      | 20A | 39.63 | 86.38 | 1.66 |                   |
| tet(36)-A    | 20A | 38.43 | 81.86 | 1.75 |                   |
| tet(36)-B    | 20A |       |       |      | NoAmplification   |
| tet(37)      | 20A | 24.61 | 75.95 | 1.97 | MultipleMeltPeaks |
| tetA-01      | 20A | 28.93 | 85.17 | 1.93 |                   |
| tetA-02      | 20A | 34.09 | 87.87 | 1.92 |                   |
| tetB-01      | 20A | 30.79 | 88.63 | 1.98 |                   |
| tetB-02      | 20A | 38.62 | 87.06 | 1.6  |                   |
| tetC-01      | 20A |       |       |      | NoAmplification   |
| tetC-02      | 20A |       |       |      | NoAmplification   |
| tetD-01      | 20A |       |       |      | NoAmplification   |
| tetD-02      | 20A |       |       |      | CurveFitFailed    |
| tetE         | 20A |       |       |      | NoAmplification   |
| tetG-01      | 20A | 33.52 | 87.87 | 1.97 | MultipleMeltPeaks |
| tetG-02      | 20A | 36.79 | 83.8  | 1.78 |                   |
| tetH         | 20A |       |       |      | NoAmplification   |
| tetJ         | 20A |       |       |      | NoAmplification   |
| tetK         | 20A |       |       |      | NoAmplification   |
| tetL-01      | 20A | 36.06 | 80.6  | 1.86 |                   |
| tetL-02      | 20A | 36.58 | 85.28 | 1.62 |                   |
| tetM-01      | 20A | 21.74 | 76.08 | 2.03 |                   |
| tetM-02      | 20A | 22.1  | 77.51 | 2.08 |                   |
| tetO-01      | 20A |       |       |      | NoAmplification   |
| tetPA        | 20A |       |       |      | NoAmplification   |
| tetPB-01     | 20A | 35.32 | 83.26 | 1.92 |                   |
| tetPB-02     | 20A | 29.4  | 84.76 | 1.93 |                   |
| tetPB-03     | 20A |       |       |      | NoAmplification   |
| tetPB-05     | 20A |       |       |      | NoAmplification   |
| tetQ         | 20A | 23.6  | 77.04 | 2.09 |                   |
| tetR-02      | 20A | 31.72 | 88.19 | 1.93 | MultipleMeltPeaks |
| tetR-03      | 20A |       |       |      | NoAmplification   |
| tetS         | 20A | 32.25 | 85.25 | 2.11 |                   |

|             |     |       |       |      |                   |
|-------------|-----|-------|-------|------|-------------------|
| tetT        | 20A |       |       |      | NoAmplification   |
| tetU-01     | 20A |       |       |      | NoAmplification   |
| tetV        | 20A |       |       |      | NoAmplification   |
| tetW-01     | 20A | 26.88 | 81.71 | 2    |                   |
| tetX        | 20A |       |       |      | NoAmplification   |
| tnpA-01     | 20A | 35.15 | 79.24 | 1.93 | MultipleMeltPeaks |
| tnpA-02     | 20A | 39.47 | 84.56 | 1.55 | MultipleMeltPeaks |
| tnpA-03     | 20A | 35.6  | 75.06 | 2.06 |                   |
| tnpA-04     | 20A | 29.38 | 82.25 | 1.93 |                   |
| tnpA-05     | 20A |       |       |      | NoAmplification   |
| tnpA-07     | 20A |       |       |      | NoAmplification   |
| tolC-01     | 20A |       |       |      | NoAmplification   |
| tolC-02     | 20A | 30.6  | 87.84 | 1.98 |                   |
| tolC-03     | 20A | 32.57 | 85.26 | 1.93 |                   |
| Tp614       | 20A | 34.57 | 84.05 | 1.93 |                   |
| ttgA        | 20A | 36.44 | 87.26 | 1.83 |                   |
| ttgB        | 20A | 35.16 | 88.38 | 1.92 | MultipleMeltPeaks |
| vanA        | 20A |       |       |      | NoAmplification   |
| vanB-01     | 20A | 33.39 | 83.9  | 2.04 |                   |
| vanC-01     | 20A |       |       |      | NoAmplification   |
| vanC-02     | 20A |       |       |      | NoAmplification   |
| vanC-03     | 20A | 25.36 | 86.31 | 1.94 |                   |
| vanC1       | 20A |       |       |      | NoAmplification   |
| vanC2/vanC3 | 20A | 31.13 | 83.46 | 1.76 | MultipleMeltPeaks |
| vanG        | 20A |       |       |      | NoAmplification   |
| vanHB       | 20A |       |       |      | NoAmplification   |
| vanHD       | 20A | 35.06 | 74.8  | 1.92 | MultipleMeltPeaks |
| vanRA-01    | 20A |       |       |      | NoAmplification   |
| vanRA-02    | 20A |       |       |      | NoAmplification   |
| vanRB       | 20A | 36.53 | 87.2  | 1.81 | MultipleMeltPeaks |
| vanRC       | 20A |       |       |      | NoAmplification   |
| vanRC4      | 20A |       |       |      | NoAmplification   |
| vanRD       | 20A |       |       |      | NoAmplification   |
| vanSA       | 20A |       |       |      | NoAmplification   |
| vanSB       | 20A |       |       |      | NoAmplification   |
| vanSC-01    | 20A |       |       |      | NoAmplification   |
| vanSC-02    | 20A |       |       |      | NoAmplification   |
| vanTC-01    | 20A |       |       |      | NoAmplification   |
| vanTC-02    | 20A |       |       |      | NoAmplification   |
| vanTE       | 20A |       |       |      | NoAmplification   |
| vanTG       | 20A |       |       |      | NoAmplification   |
| vanWB       | 20A |       |       |      | NoAmplification   |
| vanWG       | 20A |       |       |      | NoAmplification   |
| vanXA       | 20A |       |       |      | NoAmplification   |
| vanXB       | 20A |       |       |      | NoAmplification   |
| vanXD       | 20A | 30.22 | 75.61 | 2.05 |                   |

|              |     |       |       |      |                   |
|--------------|-----|-------|-------|------|-------------------|
| vanYB        | 20A | 35.53 | 84.64 | 1.88 |                   |
| vanYD-01     | 20A | 30.28 | 82.43 | 1.85 |                   |
| vanYD-02     | 20A |       |       |      | NoAmplification   |
| vatB-01      | 20A |       |       |      | NoAmplification   |
| vatB-02      | 20A |       |       |      | CurveFitFailed    |
| vatC-01      | 20A | 34.47 | 81.25 | 1.9  |                   |
| vatC-02      | 20A | 34.17 | 87.57 | 1.89 |                   |
| vatE-01      | 20A | 30.22 | 76.35 | 2.1  |                   |
| vatE-02      | 20A |       |       |      | NoAmplification   |
| vgaA-01      | 20A |       |       |      | NoAmplification   |
| vgaA-02      | 20A |       |       |      | NoAmplification   |
| vgb-01       | 20A | 40.56 | 87.11 | 1.69 |                   |
| vgbB-01      | 20A |       |       |      | NoAmplification   |
| vgbB-02      | 20A |       |       |      | NoAmplification   |
| yceE/mdtG-0  | 20A |       |       |      | NoAmplification   |
| yceE/mdtG-0  | 20A |       |       |      | NoAmplification   |
| yceL/mdtH-0  | 20A | 32.84 | 80.58 | 1.85 | MultipleMeltPeaks |
| yceL/mdtH-0  | 20A |       |       |      | NoAmplification   |
| yceL/mdtH-0  | 20A | 36.29 | 79.11 | 1.8  | MultipleMeltPeaks |
| yidY/mdtL-01 | 20A | 32.16 | 85.15 | 2    | MultipleMeltPeaks |
| yidY/mdtL-02 | 20A |       |       |      | NoAmplification   |































| Assay          | Sample | Ct | Tm    | Efficiency | flag                         |
|----------------|--------|----|-------|------------|------------------------------|
| 16S rRNA       | 20B    |    | 15.79 | 81.23      | 2.16                         |
| aac            | 20B    |    | 30.01 | 86.33      | 1.64 MultipleMeltPeaks       |
| aac(6')-Ib(akε | 20B    |    |       |            | LowEfficiency, CtIsSmall, Ci |
| aac(6')-Ib(akε | 20B    |    | 31.73 | 86.15      | 1.92 MultipleMeltPeaks       |
| aac(6')-Ib(akε | 20B    |    | 32.06 | 90.72      | 1.7                          |
| aac(6')-II     | 20B    |    |       |            | LowEfficiency, CtIsSmall, Ci |
| aac(6')I1      | 20B    |    |       |            | NoAmplification              |
| aacA/aphD      | 20B    |    |       |            | LowEfficiency, CtIsSmall, Ci |
| aacC           | 20B    |    | 31.89 | 85.75      | 1.68 MultipleMeltPeaks       |
| aacC1          | 20B    |    |       |            | NoAmplification              |
| aacC2          | 20B    |    |       |            | LowEfficiency, CtIsSmall, Ci |
| aacC4          | 20B    |    | 33.11 | 89.64      | 1.74                         |
| aadA-01        | 20B    |    |       |            | LowEfficiency, CtIsSmall, Ci |
| aadA-02        | 20B    |    |       |            | LowEfficiency, CtIsSmall, Ci |
| aadA-1-01      | 20B    |    | 35.26 | 85.18      | 2.01                         |
| aadA-1-02      | 20B    |    |       |            | LowEfficiency, CtIsSmall, Ci |
| aadA1          | 20B    |    |       |            | BadR2, LowEfficiency, CtIsS  |
| aadA2-01       | 20B    |    |       |            | LowEfficiency, CtIsSmall, Ci |
| aadA2-02       | 20B    |    | 32.31 | 74.81      | 1.8                          |
| aadA2-03       | 20B    |    |       |            | LowEfficiency, CtIsSmall, Ci |
| aadA5-01       | 20B    |    |       |            | LowEfficiency, CtIsSmall, Ci |
| aadA5-02       | 20B    |    | 33.17 | 86.03      | 1.89 MultipleMeltPeaks       |
| aadA9-01       | 20B    |    | 33.68 | 81.55      | 1.97 MultipleMeltPeaks       |
| aadA9-02       | 20B    |    |       |            | NoAmplification              |
| aadD           | 20B    |    |       |            | LowEfficiency, CtIsSmall, Ci |
| aadE           | 20B    |    |       |            | LowEfficiency, CtIsSmall, Ci |
| acrA-01        | 20B    |    | 32.24 | 88.63      | 1.82                         |
| acrA-02        | 20B    |    | 33.49 | 84.23      | 1.86 MultipleMeltPeaks       |
| acrA-03        | 20B    |    |       |            | BadR2, LowEfficiency, CtIsS  |
| acrA-04        | 20B    |    | 33.61 | 80.37      | 1.87                         |
| acrA-05        | 20B    |    | 31.11 | 88.6       | 1.88                         |
| acrB-01        | 20B    |    |       |            | NoAmplification              |
| acrF           | 20B    |    |       |            | CurveFitFailed               |
| acrR-01        | 20B    |    |       |            | LowEfficiency, CtIsSmall, Ci |
| acrR-02        | 20B    |    | 31.98 | 85.99      | 2.04 MultipleMeltPeaks       |
| Actin          | 20B    |    | 19.46 | 87.06      | 2.03                         |
| adeA           | 20B    |    |       |            | NoAmplification              |
| ampC-01        | 20B    |    | 33.5  | 85.49      | 1.84                         |
| ampC-02        | 20B    |    |       |            | CurveFitFailed               |
| ampC-04        | 20B    |    |       |            | CurveFitFailed               |
| ampC-05        | 20B    |    |       |            | LowEfficiency, CtIsSmall, Ci |
| ampC-06        | 20B    |    |       |            | LowEfficiency, CtIsSmall, Ci |
| ampC-07        | 20B    |    |       |            | CurveFitFailed               |
| ampC-09        | 20B    |    |       |            | LowEfficiency, CtIsSmall, Ci |
| ampC/blaDH     | 20B    |    | 31.48 | 85.35      | 1.77 MultipleMeltPeaks       |

|                            |     |       |       |      |                              |
|----------------------------|-----|-------|-------|------|------------------------------|
| aph                        | 20B |       |       |      | LowEfficiency, CtIsSmall, Ci |
| aph(2')-Id-01              | 20B |       |       |      | LowEfficiency, CtIsSmall, Ci |
| aph(2')-Id-02              | 20B |       |       |      | LowEfficiency, CtIsSmall, Ci |
| aph6ia                     | 20B | 31.27 | 77.95 | 1.96 | MultipleMeltPeaks            |
| aphA1(aka k <sub>a</sub> ) | 20B |       |       |      | LowEfficiency, CtIsSmall, Ci |
| bacA-01                    | 20B | 33.67 | 82.53 | 1.92 |                              |
| bacA-02                    | 20B |       |       |      | CurveFitFailed               |
| BETA-globin                | 20B | 19.95 | 84.08 | 2.06 |                              |
| bla-ACC-1                  | 20B |       |       |      | LowEfficiency, CtIsSmall, Ci |
| bla-L1                     | 20B | 29.66 | 85.52 | 2.08 |                              |
| bla1                       | 20B |       |       |      | LowEfficiency, CtIsSmall, Ci |
| blaCMY                     | 20B |       |       |      | LowEfficiency, CtIsSmall, Ci |
| blaCMY2-01                 | 20B |       |       |      | NoAmplification              |
| blaCMY2-02                 | 20B | 29.42 | 89.48 | 1.9  | MultipleMeltPeaks            |
| blaCTX-M-01                | 20B |       |       |      | LowEfficiency, CtIsSmall, Ci |
| blaCTX-M-02                | 20B |       |       |      | LowEfficiency, CtIsSmall, S: |
| blaCTX-M-03                | 20B |       |       |      | LowEfficiency, CtIsSmall, Ci |
| blaCTX-M-04                | 20B | 33.44 | 87.65 | 2    |                              |
| blaCTX-M-05                | 20B |       |       |      | NoAmplification              |
| blaCTX-M-06                | 20B |       |       |      | CurveFitFailed               |
| blaGES                     | 20B |       |       |      | NoAmplification              |
| blaIMP-01                  | 20B |       |       |      | NoAmplification              |
| blaIMP-02                  | 20B |       |       |      | LowEfficiency, CtIsSmall, Ci |
| blaMOX/blaC                | 20B |       |       |      | NoAmplification              |
| blaOCH                     | 20B |       |       |      | NoAmplification              |
| blaOKP                     | 20B |       |       |      | NoAmplification              |
| blaOXA1/blaC               | 20B |       |       |      | LowEfficiency, CtIsSmall, Ci |
| blaOXA10-01                | 20B |       |       |      | LowEfficiency, CtIsSmall, Ci |
| blaOXA10-02                | 20B |       |       |      | LowEfficiency, CtIsSmall, Ci |
| blaOXY                     | 20B |       |       |      | LowEfficiency, CtIsSmall, Ci |
| blaPAO                     | 20B |       |       |      | LowEfficiency, CtIsSmall, Ci |
| blaPER                     | 20B |       |       |      | NoAmplification              |
| blaPSE                     | 20B |       |       |      | LowEfficiency, CtIsSmall, Ci |
| blaROB                     | 20B |       |       |      | NoAmplification              |
| blaSFO                     | 20B | 32.78 | 79.65 | 1.85 | MultipleMeltPeaks            |
| blaSHV-01                  | 20B |       |       |      | LowEfficiency, CtIsSmall, Ci |
| blaSHV-02                  | 20B |       |       |      | LowEfficiency, CtIsSmall, Ci |
| blaTEM                     | 20B |       |       |      | NoAmplification              |
| blaTLA                     | 20B |       |       |      | LowEfficiency, CtIsSmall, Ci |
| blaVEB                     | 20B |       |       |      | NoAmplification              |
| blaVIM                     | 20B |       |       |      | NoAmplification              |
| blaZ                       | 20B |       |       |      | NoAmplification              |
| carB                       | 20B |       |       |      | LowEfficiency, CtIsSmall, Ci |
| catA1                      | 20B |       |       |      | NoAmplification              |
| catB3                      | 20B | 31.79 | 87.49 | 1.98 |                              |
| catB8                      | 20B | 31.91 | 79.82 | 1.94 | MultipleMeltPeaks            |

|            |     |       |       |      |                              |
|------------|-----|-------|-------|------|------------------------------|
| ceoA       | 20B | 28.91 | 82.16 | 2.02 | MultipleMeltPeaks            |
| cepA       | 20B |       |       |      | LowEfficiency, CtIsSmall, Ci |
| cfiA       | 20B | 31.37 | 86.13 | 1.73 | MultipleMeltPeaks            |
| cfr        | 20B |       |       |      | LowEfficiency, CtIsSmall, Ci |
| cfxA       | 20B | 23.75 | 77.21 | 1.67 |                              |
| cmeA       | 20B |       |       |      | BadR2, LowEfficiency, CtIsS  |
| cmlA1-01   | 20B |       |       |      | LowEfficiency, CtIsSmall, Ci |
| cmlA1-02   | 20B |       |       |      | LowEfficiency, CtIsSmall, Ci |
| cmr        | 20B |       |       |      | LowEfficiency, CtIsSmall, Ci |
| cmx(A)     | 20B |       |       |      | CurveFitFailed               |
| cphA-01    | 20B | 34.67 | 85.52 | 1.94 |                              |
| cphA-02    | 20B |       |       |      | LowEfficiency, CtIsSmall, Ci |
| dfrA1      | 20B |       |       |      | LowEfficiency, CtIsSmall, Ci |
| dfrA12     | 20B |       |       |      | LowEfficiency, CtIsSmall, Ci |
| emrD       | 20B |       |       |      | NoAmplification              |
| ereA       | 20B |       |       |      | LowEfficiency, CtIsSmall, Ci |
| ereB       | 20B |       |       |      | CurveFitFailed               |
| erm(34)    | 20B |       |       |      | LowEfficiency, CtIsSmall, Ci |
| erm(35)    | 20B |       |       |      | LowEfficiency, CtIsSmall, Ci |
| erm(36)    | 20B |       |       |      | LowEfficiency, CtIsSmall, Ci |
| ermA       | 20B |       |       |      | LowEfficiency, CtIsSmall, Ci |
| ermA/ermTR | 20B |       |       |      | NoAmplification              |
| ermB       | 20B |       |       |      | LowEfficiency, CtIsSmall, Ci |
| ermC       | 20B |       |       |      | LowEfficiency, CtIsSmall, Ci |
| ermF       | 20B |       |       |      | LowEfficiency, CtIsSmall, Ci |
| ermJ/ermD  | 20B |       |       |      | LowEfficiency, CtIsSmall, Ci |
| ermK-01    | 20B |       |       |      | LowEfficiency, CtIsSmall, Ci |
| ermK-02    | 20B |       |       |      | LowEfficiency, CtIsSmall, Ci |
| ermT-01    | 20B |       |       |      | LowEfficiency, CtIsSmall, Ci |
| ermT-02    | 20B |       |       |      | LowEfficiency, CtIsSmall, Ci |
| ermX       | 20B |       |       |      | BadR2, LowEfficiency, CtIsS  |
| ermY       | 20B |       |       |      | NoAmplification              |
| fabK       | 20B | 30.5  | 79.93 | 1.58 |                              |
| floR       | 20B |       |       |      | BadR2, LowEfficiency, CtIsS  |
| folA       | 20B |       |       |      | NoAmplification              |
| fosB       | 20B |       |       |      | LowEfficiency, CtIsSmall, Ci |
| fosX       | 20B |       |       |      | LowEfficiency, CtIsSmall, Ci |
| fox5       | 20B | 29    | 85.96 | 1.63 |                              |
| imiR       | 20B |       |       |      | NoAmplification              |
| ImrA-01    | 20B |       |       |      | BadR2, LowEfficiency, CtIsS  |
| intl       | 20B | 31.15 | 84.31 | 1.84 | MultipleMeltPeaks            |
| intl1      | 20B | 20.66 | 87.35 | 2.19 |                              |
| IS613      | 20B |       |       |      | LowEfficiency, CtIsSmall, Ci |
| lnuA-01    | 20B |       |       |      | LowEfficiency, CtIsSmall, Ci |
| lnuB-01    | 20B |       |       |      | LowEfficiency, CtIsSmall, Ci |
| lnuB-02    | 20B |       |       |      | LowEfficiency, CtIsSmall, Ci |

|                |     |       |       |      |                              |
|----------------|-----|-------|-------|------|------------------------------|
| lnuC           | 20B | 33.32 | 87.45 | 1.83 |                              |
| marR-01        | 20B | 32.56 | 85.1  | 1.9  |                              |
| matA/mel       | 20B | 20.99 | 77.36 | 2.14 |                              |
| mdet1          | 20B |       |       |      | CurveFitFailed               |
| mdtA           | 20B | 33.56 | 81.96 | 1.9  |                              |
| mdtE/yhiU      | 20B |       |       |      | LowEfficiency, CtIsSmall, Ci |
| mecA           | 20B |       |       |      | LowEfficiency, CtIsSmall, Ci |
| mefA           | 20B | 20.56 | 80.41 | 2.08 |                              |
| mepA           | 20B |       |       |      | BadR2, LowEfficiency, CtIsS  |
| mexA           | 20B | 32.93 | 78.79 | 1.87 |                              |
| mexD           | 20B | 33.68 | 79.93 | 1.92 |                              |
| mexE           | 20B |       |       |      | NoAmplification              |
| mexF           | 20B |       |       |      | CurveFitFailed               |
| mphA-01        | 20B | 29.24 | 89.27 | 1.9  |                              |
| mphA-02        | 20B | 32.79 | 86.69 | 1.34 | MultipleMeltPeaks            |
| mphB           | 20B |       |       |      | LowEfficiency, CtIsSmall, Ci |
| mphC           | 20B |       |       |      | LowEfficiency, CtIsSmall, Ci |
| msrA-01        | 20B |       |       |      | LowEfficiency, CtIsSmall, Ci |
| msrC-01        | 20B |       |       |      | NoAmplification              |
| mtrC-01        | 20B |       |       |      | LowEfficiency, CtIsSmall, Ci |
| mtrC-02        | 20B |       |       |      | LowEfficiency, CtIsSmall, Ci |
| mtrD-02        | 20B | 28.45 | 81.41 | 1.94 |                              |
| mtrD-03        | 20B |       |       |      | LowEfficiency, CtIsSmall, S  |
| NDM1           | 20B |       |       |      | NoAmplification              |
| nimE           | 20B |       |       |      | LowEfficiency, CtIsSmall, Ci |
| nisB           | 20B |       |       |      | LowEfficiency, CtIsSmall, Ci |
| oleC           | 20B |       |       |      | LowEfficiency, CtIsSmall, Ci |
| oprD           | 20B | 28.14 | 86.04 | 2.13 |                              |
| oprJ           | 20B | 33.03 | 78.52 | 1.79 |                              |
| pbp            | 20B |       |       |      | LowEfficiency, CtIsSmall, Ci |
| pbp2x          | 20B | 23.53 | 75.22 | 1.71 |                              |
| Pbp5           | 20B |       |       |      | LowEfficiency, CtIsSmall, Ci |
| penA           | 20B |       |       |      | LowEfficiency, CtIsSmall, Ci |
| pikR1          | 20B |       |       |      | LowEfficiency, CtIsSmall, Ci |
| pikR2          | 20B |       |       |      | CurveFitFailed               |
| pmrA           | 20B | 26.55 | 78.5  | 1.86 |                              |
| pncA           | 20B | 31.15 | 89.87 | 1.9  |                              |
| putative multi | 20B |       |       |      | LowEfficiency, CtIsSmall, Ci |
| qac            | 20B |       |       |      | LowEfficiency, CtIsSmall, Ci |
| qacA           | 20B |       |       |      | LowEfficiency, CtIsSmall, Ci |
| qacA/qacB      | 20B |       |       |      | LowEfficiency, CtIsSmall, Ci |
| qacEdelta1-0   | 20B |       |       |      | LowEfficiency, CtIsSmall, Ci |
| qacEdelta1-0   | 20B |       |       |      | BadR2, LowEfficiency, CtIsS  |
| qacH-01        | 20B |       |       |      | CurveFitFailed               |
| qacH-02        | 20B |       |       |      | CurveFitFailed               |
| qnrA           | 20B | 32.54 | 75.18 | 1.91 | MultipleMeltPeaks            |

|              |     |       |       |      |                              |
|--------------|-----|-------|-------|------|------------------------------|
| rarD-02      | 20B |       |       |      | NoAmplification              |
| sat4         | 20B |       |       |      | LowEfficiency, CtIsSmall, Ci |
| sdeB         | 20B |       |       |      | LowEfficiency, CtIsSmall, Ci |
| spcN-01      | 20B |       |       |      | LowEfficiency, CtIsSmall, Ci |
| speA         | 20B |       |       |      | NoAmplification              |
| str          | 20B |       |       |      | LowEfficiency, CtIsSmall, Ci |
| strA         | 20B |       |       |      | LowEfficiency, CtIsSmall, Ci |
| strB         | 20B |       |       |      | LowEfficiency, CtIsSmall, Ci |
| sul1         | 20B |       |       |      | NoAmplification              |
| sul2         | 20B | 27.88 | 85.82 | 1.93 |                              |
| sulA/foIP-01 | 20B | 22.33 | 80.74 | 2.09 |                              |
| sulA/foIP-03 | 20B | 22.62 | 83.97 | 1.97 |                              |
| tet(32)      | 20B | 29.15 | 80.9  | 1.88 |                              |
| tet(34)      | 20B | 32.44 | 75.26 | 1.92 |                              |
| tet(35)      | 20B |       |       |      | NoAmplification              |
| tet(36)-A    | 20B |       |       |      | LowEfficiency, CtIsSmall, Ci |
| tet(36)-B    | 20B |       |       |      | LowEfficiency, CtIsSmall, Ci |
| tet(37)      | 20B | 25.25 | 75.89 | 1.92 | MultipleMeltPeaks            |
| tetA-01      | 20B | 30.6  | 85.11 | 2    |                              |
| tetA-02      | 20B | 34.95 | 88.12 | 1.97 |                              |
| tetB-01      | 20B | 33.05 | 88.05 | 1.89 |                              |
| tetB-02      | 20B |       |       |      | LowEfficiency, CtIsSmall, Ci |
| tetC-01      | 20B |       |       |      | NoAmplification              |
| tetC-02      | 20B |       |       |      | LowEfficiency, CtIsSmall, Ci |
| tetD-01      | 20B |       |       |      | LowEfficiency, CtIsSmall, Ci |
| tetD-02      | 20B | 34.3  | 80.43 | 2.01 | MultipleMeltPeaks            |
| tetE         | 20B |       |       |      | LowEfficiency, CtIsSmall, Ci |
| tetG-01      | 20B |       |       |      | LowEfficiency, CtIsSmall, Ci |
| tetG-02      | 20B |       |       |      | CurveFitFailed               |
| tetH         | 20B |       |       |      | LowEfficiency, CtIsSmall, Ci |
| tetJ         | 20B |       |       |      | LowEfficiency, CtIsSmall, Ci |
| tetK         | 20B |       |       |      | LowEfficiency, CtIsSmall, Ci |
| tetL-01      | 20B |       |       |      | LowEfficiency, CtIsSmall, Ci |
| tetL-02      | 20B |       |       |      | LowEfficiency, CtIsSmall, Ci |
| tetM-01      | 20B | 20.96 | 75.91 | 2.13 |                              |
| tetM-02      | 20B | 20.5  | 77.37 | 2.03 |                              |
| tetO-01      | 20B |       |       |      | LowEfficiency, CtIsSmall, Ci |
| tetPA        | 20B |       |       |      | LowEfficiency, CtIsSmall, Ci |
| tetPB-01     | 20B |       |       |      | LowEfficiency, CtIsSmall, Ci |
| tetPB-02     | 20B | 31.57 | 84.71 | 1.6  |                              |
| tetPB-03     | 20B |       |       |      | LowEfficiency, CtIsSmall, Ci |
| tetPB-05     | 20B |       |       |      | LowEfficiency, CtIsSmall, Ci |
| tetQ         | 20B | 24.01 | 76.85 | 2.13 |                              |
| tetR-02      | 20B | 32.71 | 89.59 | 1.67 | MultipleMeltPeaks            |
| tetR-03      | 20B |       |       |      | LowEfficiency, CtIsSmall, Ci |
| tetS         | 20B |       |       |      | LowEfficiency, CtIsSmall, Ci |

|             |     |       |       |      |                              |
|-------------|-----|-------|-------|------|------------------------------|
| tetT        | 20B |       |       |      | LowEfficiency, CtIsSmall, Ci |
| tetU-01     | 20B |       |       |      | LowEfficiency, CtIsSmall, Ci |
| tetV        | 20B |       |       |      | LowEfficiency, CtIsSmall, Ci |
| tetW-01     | 20B | 23.42 | 81.85 | 1.98 |                              |
| tetX        | 20B |       |       |      | LowEfficiency, CtIsSmall, Ci |
| tnpA-01     | 20B | 33.67 | 83.87 | 1.97 |                              |
| tnpA-02     | 20B |       |       |      | BadR2, LowEfficiency, CtIsS  |
| tnpA-03     | 20B | 22.87 | 77.68 | 1.75 |                              |
| tnpA-04     | 20B |       |       |      | LowEfficiency, CtIsSmall, Ci |
| tnpA-05     | 20B |       |       |      | LowEfficiency, CtIsSmall, Ci |
| tnpA-07     | 20B |       |       |      | LowEfficiency, CtIsSmall, Ci |
| tolC-01     | 20B |       |       |      | NoAmplification              |
| tolC-02     | 20B | 31.2  | 87.67 | 1.8  |                              |
| tolC-03     | 20B | 33.5  | 87.6  | 1.91 |                              |
| Tp614       | 20B | 32.75 | 83.04 | 1.87 | MultipleMeltPeaks            |
| ttgA        | 20B |       |       |      | CurveFitFailed               |
| ttgB        | 20B |       |       |      | CurveFitFailed               |
| vanA        | 20B |       |       |      | LowEfficiency, CtIsSmall, Ci |
| vanB-01     | 20B |       |       |      | BadR2, LowEfficiency, CtIsS  |
| vanC-01     | 20B |       |       |      | LowEfficiency, CtIsSmall, Ci |
| vanC-02     | 20B |       |       |      | LowEfficiency, CtIsSmall, Ci |
| vanC-03     | 20B |       |       |      | CurveFitFailed               |
| vanC1       | 20B |       |       |      | LowEfficiency, CtIsSmall, Ci |
| vanC2/vanC3 | 20B |       |       |      | CurveFitFailed               |
| vanG        | 20B |       |       |      | CurveFitFailed               |
| vanHB       | 20B |       |       |      | LowEfficiency, CtIsSmall, Ci |
| vanHD       | 20B |       |       |      | LowEfficiency, CtIsSmall, Ci |
| vanRA-01    | 20B |       |       |      | LowEfficiency, CtIsSmall, Ci |
| vanRA-02    | 20B |       |       |      | LowEfficiency, CtIsSmall, Ci |
| vanRB       | 20B |       |       |      | BadR2, LowEfficiency, CtIsS  |
| vanRC       | 20B |       |       |      | LowEfficiency, CtIsSmall, Ci |
| vanRC4      | 20B |       |       |      | LowEfficiency, CtIsSmall, Ci |
| vanRD       | 20B |       |       |      | NoAmplification              |
| vanSA       | 20B |       |       |      | LowEfficiency, CtIsSmall, Ci |
| vanSB       | 20B |       |       |      | LowEfficiency, CtIsSmall, Ci |
| vanSC-01    | 20B |       |       |      | LowEfficiency, CtIsSmall, Ci |
| vanSC-02    | 20B |       |       |      | LowEfficiency, CtIsSmall, Ci |
| vanTC-01    | 20B |       |       |      | LowEfficiency, CtIsSmall, Ci |
| vanTC-02    | 20B |       |       |      | LowEfficiency, CtIsSmall, Ci |
| vanTE       | 20B |       |       |      | LowEfficiency, CtIsSmall, Ci |
| vanTG       | 20B |       |       |      | LowEfficiency, CtIsSmall, Ci |
| vanWB       | 20B |       |       |      | LowEfficiency, CtIsSmall, Ci |
| vanWG       | 20B |       |       |      | LowEfficiency, CtIsSmall, Ci |
| vanXA       | 20B |       |       |      | LowEfficiency, CtIsSmall, Ci |
| vanXB       | 20B |       |       |      | LowEfficiency, CtIsSmall, Ci |
| vanXD       | 20B | 31.75 | 75.84 | 1.99 |                              |

|              |     |       |       |      |                              |
|--------------|-----|-------|-------|------|------------------------------|
| vanYB        | 20B |       |       |      | LowEfficiency, CtIsSmall, Ci |
| vanYD-01     | 20B | 31.09 | 87.22 | 1.69 |                              |
| vanYD-02     | 20B |       |       |      | CurveFitFailed               |
| vatB-01      | 20B |       |       |      | LowEfficiency, CtIsSmall, Ci |
| vatB-02      | 20B |       |       |      | LowEfficiency, CtIsSmall, Ci |
| vatC-01      | 20B | 32.97 | 81.21 | 1.84 |                              |
| vatC-02      | 20B |       |       |      | CurveFitFailed               |
| vatE-01      | 20B | 32.52 | 75.22 | 1.97 |                              |
| vatE-02      | 20B |       |       |      | LowEfficiency, CtIsSmall, Ci |
| vgaA-01      | 20B |       |       |      | LowEfficiency, CtIsSmall, Ci |
| vgaA-02      | 20B |       |       |      | LowEfficiency, CtIsSmall, Ci |
| vgb-01       | 20B |       |       |      | LowEfficiency, CtIsSmall, Ci |
| vgbB-01      | 20B |       |       |      | LowEfficiency, CtIsSmall, Ci |
| vgbB-02      | 20B |       |       |      | LowEfficiency, CtIsSmall, Ci |
| yceE/mdtG-0  | 20B |       |       |      | BadR2, LowEfficiency, CtIsS  |
| yceE/mdtG-0  | 20B |       |       |      | NoAmplification              |
| yceL/mdtH-0  | 20B | 31.68 | 85.99 | 1.63 | MultipleMeltPeaks            |
| yceL/mdtH-0  | 20B |       |       |      | NoAmplification              |
| yceL/mdtH-0  | 20B |       |       |      | LowEfficiency, CtIsSmall, Ci |
| yidY/mdtL-01 | 20B | 32.46 | 82.4  | 1.77 | MultipleMeltPeaks            |
| yidY/mdtL-02 | 20B |       |       |      | LowEfficiency, CtIsSmall, Ci |































| Assay          | Sample | Ct | Tm    | Efficiency | flag                         |
|----------------|--------|----|-------|------------|------------------------------|
| 16S rRNA       | 20C    |    | 16.44 | 81.62      | 2.01                         |
| aac            | 20C    |    | 34.89 | 90.18      | 1.75 MultipleMeltPeaks       |
| aac(6')-Ib(akε | 20C    |    |       |            | LowEfficiency, CtIsSmall, C  |
| aac(6')-Ib(akε | 20C    |    | 33.85 | 89.32      | 1.87 MultipleMeltPeaks       |
| aac(6')-Ib(akε | 20C    |    | 37.45 | 76.52      | 1.84 MultipleMeltPeaks       |
| aac(6')-II     | 20C    |    |       |            | CurveFitFailed               |
| aac(6')I1      | 20C    |    | 34.97 | 86.22      | 1.87                         |
| aacA/aphD      | 20C    |    |       |            | LowEfficiency, CtIsSmall, Sε |
| aacC           | 20C    |    | 31.59 | 89.04      | 1.83                         |
| aacC1          | 20C    |    |       |            | NoAmplification              |
| aacC2          | 20C    |    |       |            | NoAmplification              |
| aacC4          | 20C    |    |       |            | NoAmplification              |
| aadA-01        | 20C    |    |       |            | CurveFitFailed               |
| aadA-02        | 20C    |    |       |            | LowEfficiency, CtIsSmall, Sε |
| aadA-1-01      | 20C    |    |       |            | NoAmplification              |
| aadA-1-02      | 20C    |    |       |            | NoAmplification              |
| aadA1          | 20C    |    | 38.41 | 83.03      | 1.88                         |
| aadA2-01       | 20C    |    |       |            | CurveFitFailed               |
| aadA2-02       | 20C    |    |       |            | NoAmplification              |
| aadA2-03       | 20C    |    |       |            | NoAmplification              |
| aadA5-01       | 20C    |    |       |            | NoAmplification              |
| aadA5-02       | 20C    |    | 35.76 | 77.95      | 1.92                         |
| aadA9-01       | 20C    |    | 37    | 88.2       | 1.71                         |
| aadA9-02       | 20C    |    | 41.8  | 77.63      | 1.86                         |
| aadD           | 20C    |    |       |            | NoAmplification              |
| aadE           | 20C    |    |       |            | CurveFitFailed               |
| acrA-01        | 20C    |    | 36.71 | 87.92      | 1.86                         |
| acrA-02        | 20C    |    |       |            | NoAmplification              |
| acrA-03        | 20C    |    |       |            | CurveFitFailed               |
| acrA-04        | 20C    |    | 31.82 | 81.87      | 1.91 MultipleMeltPeaks       |
| acrA-05        | 20C    |    | 32.87 | 89.31      | 1.98                         |
| acrB-01        | 20C    |    | 33.65 | 82.34      | 1.98                         |
| acrF           | 20C    |    | 33.23 | 87.95      | 1.92                         |
| acrR-01        | 20C    |    | 37.63 | 80.43      | 1.72 MultipleMeltPeaks       |
| acrR-02        | 20C    |    | 33.13 | 91.99      | 1.92                         |
| Actin          | 20C    |    | 23.36 | 87.06      | 1.97                         |
| adeA           | 20C    |    |       |            | CurveFitFailed               |
| ampC-01        | 20C    |    |       |            | CurveFitFailed               |
| ampC-02        | 20C    |    |       |            | BadR2, LowEfficiency, CtIsS  |
| ampC-04        | 20C    |    | 34    | 77.97      | 1.89                         |
| ampC-05        | 20C    |    |       |            | NoAmplification              |
| ampC-06        | 20C    |    |       |            | LowEfficiency, CtIsSmall, C  |
| ampC-07        | 20C    |    |       |            | NoAmplification              |
| ampC-09        | 20C    |    |       |            | LowEfficiency, CtIsSmall, C  |
| ampC/blaDH     | 20C    |    | 33.51 | 83.32      | 1.91                         |

|                          |     |       |       |      |                                          |
|--------------------------|-----|-------|-------|------|------------------------------------------|
| aph                      | 20C |       |       |      | CurveFitFailed                           |
| aph(2')-Id-01            | 20C |       |       |      | CurveFitFailed                           |
| aph(2')-Id-02            | 20C |       |       |      | LowEfficiency, CtIsSmall, S <sub>e</sub> |
| aph6ia                   | 20C | 40.07 | 78.03 | 1.78 |                                          |
| aphA1(aka k <sub>e</sub> | 20C |       |       |      | LowEfficiency, CtIsSmall, S <sub>e</sub> |
| bacA-01                  | 20C | 39.03 | 78.52 | 1.73 | MultipleMeltPeaks                        |
| bacA-02                  | 20C | 37.76 | 88.01 | 1.76 |                                          |
| BETA-globin              | 20C | 24.35 | 84.09 | 1.97 |                                          |
| bla-ACC-1                | 20C |       |       |      | NoAmplification                          |
| bla-L1                   | 20C | 31.04 | 86.21 | 1.98 |                                          |
| bla1                     | 20C |       |       |      | CurveFitFailed                           |
| blaCMY                   | 20C | 38.38 | 86.16 | 1.81 | MultipleMeltPeaks                        |
| blaCMY2-01               | 20C |       |       |      | NoAmplification                          |
| blaCMY2-02               | 20C | 32.53 | 83.6  | 1.94 |                                          |
| blaCTX-M-01              | 20C |       |       |      | NoAmplification                          |
| blaCTX-M-02              | 20C |       |       |      | CurveFitFailed                           |
| blaCTX-M-03              | 20C |       |       |      | NoAmplification                          |
| blaCTX-M-04              | 20C | 38.43 | 63.2  | 1.86 | MultipleMeltPeaks                        |
| blaCTX-M-05              | 20C | 33.44 | 76.45 | 1.88 |                                          |
| blaCTX-M-06              | 20C |       |       |      | NoAmplification                          |
| blaGES                   | 20C |       |       |      | NoAmplification                          |
| blaIMP-01                | 20C |       |       |      | NoAmplification                          |
| blaIMP-02                | 20C |       |       |      | LowEfficiency, CtIsSmall, S <sub>e</sub> |
| blaMOX/blaC              | 20C |       |       |      | NoAmplification                          |
| blaOCH                   | 20C |       |       |      | NoAmplification                          |
| blaOKP                   | 20C |       |       |      | NoAmplification                          |
| blaOXA1/blaC             | 20C |       |       |      | LowEfficiency, CtIsSmall, S <sub>e</sub> |
| blaOXA10-01              | 20C |       |       |      | LowEfficiency, CtIsSmall, C <sub>i</sub> |
| blaOXA10-02              | 20C |       |       |      | CurveFitFailed                           |
| blaOXY                   | 20C | 40.72 | 84.56 | 1.54 |                                          |
| blaPAO                   | 20C |       |       |      | NoAmplification                          |
| blaPER                   | 20C |       |       |      | CurveFitFailed                           |
| blaPSE                   | 20C |       |       |      | NoAmplification                          |
| blaROB                   | 20C |       |       |      | NoAmplification                          |
| blaSFO                   | 20C | 30.13 | 85.87 | 1.85 |                                          |
| blaSHV-01                | 20C |       |       |      | LowEfficiency, CtIsSmall, C <sub>i</sub> |
| blaSHV-02                | 20C | 38.23 | 89.42 | 1.79 | MultipleMeltPeaks                        |
| blaTEM                   | 20C | 26.87 | 79.23 | 1.95 |                                          |
| blaTLA                   | 20C |       |       |      | NoAmplification                          |
| blaVEB                   | 20C |       |       |      | NoAmplification                          |
| blaVIM                   | 20C |       |       |      | NoAmplification                          |
| blaZ                     | 20C |       |       |      | NoAmplification                          |
| carB                     | 20C |       |       |      | CurveFitFailed                           |
| catA1                    | 20C |       |       |      | NoAmplification                          |
| catB3                    | 20C |       |       |      | CurveFitFailed                           |
| catB8                    | 20C | 32.06 | 83.29 | 1.98 |                                          |

|            |     |       |       |      |                              |
|------------|-----|-------|-------|------|------------------------------|
| ceoA       | 20C | 37.95 | 82.48 | 1.79 |                              |
| cepA       | 20C |       |       |      | NoAmplification              |
| cfiA       | 20C | 34.87 | 85.4  | 1.94 | MultipleMeltPeaks            |
| cfr        | 20C |       |       |      | CurveFitFailed               |
| cfxA       | 20C | 25.19 | 77.3  | 1.87 |                              |
| cmeA       | 20C |       |       |      | CurveFitFailed               |
| cmlA1-01   | 20C |       |       |      | CurveFitFailed               |
| cmlA1-02   | 20C |       |       |      | NoAmplification              |
| cmr        | 20C |       |       |      | CurveFitFailed               |
| cmx(A)     | 20C | 29.3  | 84.33 | 1.98 |                              |
| cphA-01    | 20C |       |       |      | NoAmplification              |
| cphA-02    | 20C | 30.25 | 76.92 | 1.95 |                              |
| dfrA1      | 20C |       |       |      | NoAmplification              |
| dfrA12     | 20C | 39    | 78.4  | 1.83 | MultipleMeltPeaks            |
| emrD       | 20C | 32.74 | 81.73 | 1.94 |                              |
| ereA       | 20C | 38.74 | 86.75 | 1.87 | MultipleMeltPeaks            |
| ereB       | 20C | 42.33 | 61.99 | 1.6  | MultipleMeltPeaks            |
| erm(34)    | 20C | 32.15 | 85.63 | 2    |                              |
| erm(35)    | 20C |       |       |      | NoAmplification              |
| erm(36)    | 20C | 35.47 | 88.8  | 1.95 |                              |
| ermA       | 20C |       |       |      | LowEfficiency, CtIsSmall, S: |
| ermA/ermTR | 20C |       |       |      | NoAmplification              |
| ermB       | 20C |       |       |      | LowEfficiency, CtIsSmall, C: |
| ermC       | 20C | 34.57 | 78.19 | 1.98 |                              |
| ermF       | 20C |       |       |      | LowEfficiency, CtIsSmall, S: |
| ermJ/ermD  | 20C |       |       |      | LowEfficiency, CtIsSmall, C: |
| ermK-01    | 20C | 38.86 | 72.9  | 1.97 |                              |
| ermK-02    | 20C | 38.03 | 87.8  | 1.88 |                              |
| ermT-01    | 20C |       |       |      | LowEfficiency, CtIsSmall, S: |
| ermT-02    | 20C |       |       |      | LowEfficiency, CtIsSmall, S: |
| ermX       | 20C |       |       |      | NoAmplification              |
| ermY       | 20C |       |       |      | NoAmplification              |
| fabK       | 20C | 28.15 | 80.2  | 1.88 |                              |
| floR       | 20C |       |       |      | NoAmplification              |
| folA       | 20C |       |       |      | NoAmplification              |
| fosB       | 20C |       |       |      | LowEfficiency, CtIsSmall, S: |
| fosX       | 20C |       |       |      | NoAmplification              |
| fox5       | 20C | 31.3  | 86.26 | 1.83 |                              |
| imiR       | 20C |       |       |      | NoAmplification              |
| ImrA-01    | 20C |       |       |      | NoAmplification              |
| intl       | 20C | 31.59 | 84.42 | 1.94 | MultipleMeltPeaks            |
| intl1      | 20C | 21.53 | 89.11 | 2.03 |                              |
| IS613      | 20C |       |       |      | CurveFitFailed               |
| lnuA-01    | 20C | 30    | 73.29 | 2.04 |                              |
| lnuB-01    | 20C | 37.42 | 72.62 | 1.89 |                              |
| lnuB-02    | 20C |       |       |      | NoAmplification              |

|                |     |       |       |      |                                          |
|----------------|-----|-------|-------|------|------------------------------------------|
| lnuC           | 20C | 35.53 | 83.53 | 1.72 | MultipleMeltPeaks                        |
| marR-01        | 20C |       |       |      | LowEfficiency, CtIsSmall, S <sub>c</sub> |
| matA/mel       | 20C | 23.15 | 77.6  | 2.06 |                                          |
| mdet1          | 20C |       |       |      | NoAmplification                          |
| mdtA           | 20C | 31.95 | 76.94 | 2    |                                          |
| mdtE/yhiU      | 20C | 37.74 | 85.72 | 1.79 |                                          |
| mecA           | 20C |       |       |      | NoAmplification                          |
| mefA           | 20C | 22.81 | 80.64 | 1.96 |                                          |
| mepA           | 20C | 33.07 | 78.41 | 2.04 |                                          |
| mexA           | 20C | 33.34 | 88.24 | 1.95 |                                          |
| mexD           | 20C | 31.39 | 80.31 | 2.03 |                                          |
| mexE           | 20C |       |       |      | NoAmplification                          |
| mexF           | 20C | 33.38 | 81.37 | 1.48 | MultipleMeltPeaks                        |
| mphA-01        | 20C | 31.57 | 89.48 | 1.91 |                                          |
| mphA-02        | 20C | 34.33 | 76.62 | 1.34 | MultipleMeltPeaks                        |
| mphB           | 20C | 32.88 | 88.83 | 2    |                                          |
| mphC           | 20C |       |       |      | NoAmplification                          |
| msrA-01        | 20C |       |       |      | NoAmplification                          |
| msrC-01        | 20C |       |       |      | NoAmplification                          |
| mtrC-01        | 20C | 38.34 | 61.9  | 1.68 | MultipleMeltPeaks                        |
| mtrC-02        | 20C | 38.56 | 84.02 | 1.85 |                                          |
| mtrD-02        | 20C | 27.72 | 81.08 | 2    | MultipleMeltPeaks                        |
| mtrD-03        | 20C | 33.35 | 84.9  | 1.87 | MultipleMeltPeaks                        |
| NDM1           | 20C |       |       |      | NoAmplification                          |
| nimE           | 20C |       |       |      | NoAmplification                          |
| nisB           | 20C | 35.06 | 87.44 | 1.96 |                                          |
| oleC           | 20C | 37.29 | 86.18 | 1.76 | MultipleMeltPeaks                        |
| oprD           | 20C | 30.15 | 84.97 | 1.98 |                                          |
| oprJ           | 20C | 35.51 | 86.98 | 1.96 |                                          |
| pbp            | 20C |       |       |      | CurveFitFailed                           |
| pbp2x          | 20C | 24.95 | 75.65 | 1.99 |                                          |
| Pbp5           | 20C |       |       |      | CurveFitFailed                           |
| penA           | 20C | 38.58 | 85.42 | 1.71 | MultipleMeltPeaks                        |
| pikR1          | 20C |       |       |      | NoAmplification                          |
| pikR2          | 20C | 37.65 | 80.63 | 1.71 | MultipleMeltPeaks                        |
| pmrA           | 20C | 28.9  | 78.41 | 2.04 |                                          |
| pncA           | 20C | 30.06 | 89.49 | 1.74 | MultipleMeltPeaks                        |
| putative multi | 20C |       |       |      | NoAmplification                          |
| qac            | 20C |       |       |      | CurveFitFailed                           |
| qacA           | 20C |       |       |      | NoAmplification                          |
| qacA/qacB      | 20C |       |       |      | NoAmplification                          |
| qacEdelta1-0   | 20C |       |       |      | NoAmplification                          |
| qacEdelta1-0   | 20C | 34.21 | 75.48 | 1.83 |                                          |
| qacH-01        | 20C | 37.68 | 62.48 | 2.06 | MultipleMeltPeaks                        |
| qacH-02        | 20C | 38.8  | 84.02 | 1.62 | MultipleMeltPeaks                        |
| qnrA           | 20C |       |       |      | NoAmplification                          |



|              |     |       |       |      |                              |
|--------------|-----|-------|-------|------|------------------------------|
| rarD-02      | 20C |       |       |      | NoAmplification              |
| sat4         | 20C |       |       |      | CurveFitFailed               |
| sdeB         | 20C |       |       |      | CurveFitFailed               |
| spcN-01      | 20C |       |       |      | NoAmplification              |
| speA         | 20C |       |       |      | NoAmplification              |
| str          | 20C |       |       |      | NoAmplification              |
| strA         | 20C |       |       |      | CurveFitFailed               |
| strB         | 20C |       |       |      | NoAmplification              |
| sul1         | 20C |       |       |      | NoAmplification              |
| sul2         | 20C |       |       |      | LowEfficiency, CtIsSmall, S: |
| sulA/foIP-01 | 20C | 23.94 | 80.88 | 2.01 |                              |
| sulA/foIP-03 | 20C | 23.99 | 83.79 | 2    |                              |
| tet(32)      | 20C |       |       |      | NoAmplification              |
| tet(34)      | 20C | 28.33 | 76.17 | 2.03 |                              |
| tet(35)      | 20C |       |       |      | NoAmplification              |
| tet(36)-A    | 20C |       |       |      | NoAmplification              |
| tet(36)-B    | 20C |       |       |      | NoAmplification              |
| tet(37)      | 20C | 27.3  | 76.01 | 1.99 | MultipleMeltPeaks            |
| tetA-01      | 20C | 32.79 | 85.1  | 1.94 |                              |
| tetA-02      | 20C | 39.93 | 84.86 | 1.74 |                              |
| tetB-01      | 20C | 33.35 | 77.7  | 1.96 |                              |
| tetB-02      | 20C |       |       |      | CurveFitFailed               |
| tetC-01      | 20C |       |       |      | NoAmplification              |
| tetC-02      | 20C |       |       |      | LowEfficiency, CtIsSmall, Ci |
| tetD-01      | 20C |       |       |      | CurveFitFailed               |
| tetD-02      | 20C | 37.34 | 76.3  | 1.88 |                              |
| tetE         | 20C |       |       |      | NoAmplification              |
| tetG-01      | 20C | 31.3  | 86.34 | 2.09 |                              |
| tetG-02      | 20C | 36.01 | 87.42 | 1.87 |                              |
| tetH         | 20C |       |       |      | NoAmplification              |
| tetJ         | 20C |       |       |      | NoAmplification              |
| tetK         | 20C |       |       |      | LowEfficiency, CtIsSmall, Ci |
| tetL-01      | 20C |       |       |      | NoAmplification              |
| tetL-02      | 20C | 35.5  | 85.57 | 1.79 |                              |
| tetM-01      | 20C | 23.11 | 76.21 | 2    |                              |
| tetM-02      | 20C | 23.86 | 77.55 | 2.04 |                              |
| tetO-01      | 20C |       |       |      | LowEfficiency, CtIsSmall, S: |
| tetPA        | 20C |       |       |      | NoAmplification              |
| tetPB-01     | 20C | 38.6  | 84.54 | 1.7  | MultipleMeltPeaks            |
| tetPB-02     | 20C | 34.21 | 84.74 | 2.06 |                              |
| tetPB-03     | 20C |       |       |      | NoAmplification              |
| tetPB-05     | 20C |       |       |      | LowEfficiency, CtIsSmall, Ci |
| tetQ         | 20C | 26.31 | 77.12 | 2.09 |                              |
| tetR-02      | 20C | 31.73 | 87.5  | 1.87 |                              |
| tetR-03      | 20C |       |       |      | NoAmplification              |
| tetS         | 20C | 37.12 | 86.36 | 1.82 |                              |

|             |     |       |       |      |                                          |
|-------------|-----|-------|-------|------|------------------------------------------|
| tetT        | 20C |       |       |      | NoAmplification                          |
| tetU-01     | 20C |       |       |      | NoAmplification                          |
| tetV        | 20C |       |       |      | NoAmplification                          |
| tetW-01     | 20C | 29.52 | 81.55 | 2    |                                          |
| tetX        | 20C |       |       |      | NoAmplification                          |
| tnpA-01     | 20C | 31.45 | 83.96 | 1.95 |                                          |
| tnpA-02     | 20C | 37.9  | 74.45 | 1.81 | MultipleMeltPeaks                        |
| tnpA-03     | 20C | 33.43 | 75.45 | 2.14 |                                          |
| tnpA-04     | 20C | 29.31 | 82.28 | 1.94 |                                          |
| tnpA-05     | 20C | 29.16 | 80.76 | 1.94 |                                          |
| tnpA-07     | 20C |       |       |      | NoAmplification                          |
| tolC-01     | 20C |       |       |      | NoAmplification                          |
| tolC-02     | 20C | 34.37 | 83.82 | 1.92 |                                          |
| tolC-03     | 20C | 35.78 | 85.29 | 1.89 |                                          |
| Tp614       | 20C |       |       |      | CurveFitFailed                           |
| ttgA        | 20C | 34.7  | 86.91 | 1.84 |                                          |
| ttgB        | 20C | 34.56 | 78.85 | 2.03 |                                          |
| vanA        | 20C |       |       |      | NoAmplification                          |
| vanB-01     | 20C | 35.5  | 85.16 | 1.97 | MultipleMeltPeaks                        |
| vanC-01     | 20C |       |       |      | LowEfficiency, CtIsSmall, S <sub>e</sub> |
| vanC-02     | 20C |       |       |      | CurveFitFailed                           |
| vanC-03     | 20C | 28.76 | 85.93 | 1.97 |                                          |
| vanC1       | 20C |       |       |      | CurveFitFailed                           |
| vanC2/vanC3 | 20C | 32.92 | 85.08 | 2.02 |                                          |
| vanG        | 20C |       |       |      | NoAmplification                          |
| vanHB       | 20C |       |       |      | CurveFitFailed                           |
| vanHD       | 20C | 36.49 | 83.97 | 1.88 |                                          |
| vanRA-01    | 20C |       |       |      | NoAmplification                          |
| vanRA-02    | 20C |       |       |      | NoAmplification                          |
| vanRB       | 20C | 33.93 | 79.82 | 2.13 | MultipleMeltPeaks                        |
| vanRC       | 20C |       |       |      | LowEfficiency, CtIsSmall, S <sub>e</sub> |
| vanRC4      | 20C |       |       |      | LowEfficiency, CtIsSmall, S <sub>e</sub> |
| vanRD       | 20C |       |       |      | NoAmplification                          |
| vanSA       | 20C |       |       |      | CurveFitFailed                           |
| vanSB       | 20C |       |       |      | LowEfficiency, CtIsSmall, S <sub>e</sub> |
| vanSC-01    | 20C |       |       |      | CurveFitFailed                           |
| vanSC-02    | 20C |       |       |      | LowEfficiency, CtIsSmall, S <sub>e</sub> |
| vanTC-01    | 20C |       |       |      | LowEfficiency, CtIsSmall, S <sub>e</sub> |
| vanTC-02    | 20C |       |       |      | CurveFitFailed                           |
| vanTE       | 20C |       |       |      | LowEfficiency, CtIsSmall, S <sub>e</sub> |
| vanTG       | 20C |       |       |      | LowEfficiency, CtIsSmall, S <sub>e</sub> |
| vanWB       | 20C |       |       |      | LowEfficiency, CtIsSmall, S <sub>e</sub> |
| vanWG       | 20C | 38.15 | 74.12 | 1.88 |                                          |
| vanXA       | 20C |       |       |      | CurveFitFailed                           |
| vanXB       | 20C |       |       |      | NoAmplification                          |
| vanXD       | 20C | 30.17 | 75.54 | 2.07 |                                          |

|              |     |       |       |      |                              |
|--------------|-----|-------|-------|------|------------------------------|
| vanYB        | 20C |       |       |      | LowEfficiency, CtIsSmall, S: |
| vanYD-01     | 20C | 34.66 | 81.21 | 1.86 |                              |
| vanYD-02     | 20C |       |       |      | LowEfficiency, CtIsSmall, S: |
| vatB-01      | 20C |       |       |      | LowEfficiency, CtIsSmall, C: |
| vatB-02      | 20C |       |       |      | LowEfficiency, CtIsSmall, S: |
| vatC-01      | 20C |       |       |      | LowEfficiency, CtIsSmall, S: |
| vatC-02      | 20C |       |       |      | CurveFitFailed               |
| vatE-01      | 20C | 30.65 | 76.3  | 2.07 |                              |
| vatE-02      | 20C |       |       |      | NoAmplification              |
| vgaA-01      | 20C |       |       |      | CurveFitFailed               |
| vgaA-02      | 20C |       |       |      | LowEfficiency, CtIsSmall, S: |
| vgb-01       | 20C | 35.19 | 84.75 | 1.87 |                              |
| vgbB-01      | 20C |       |       |      | NoAmplification              |
| vgbB-02      | 20C |       |       |      | NoAmplification              |
| yceE/mdtG-0  | 20C |       |       |      | CurveFitFailed               |
| yceE/mdtG-0  | 20C |       |       |      | NoAmplification              |
| yceL/mdtH-0  | 20C | 35.13 | 86.31 | 1.76 |                              |
| yceL/mdtH-0  | 20C |       |       |      | NoAmplification              |
| yceL/mdtH-0  | 20C | 39.81 | 75.96 | 1.78 | MultipleMeltPeaks            |
| yidY/mdtL-01 | 20C | 33.95 | 84.73 | 1.99 |                              |
| yidY/mdtL-02 | 20C | 34.95 | 77.01 | 2.01 |                              |































| Assay          | Sample | Ct | Tm    | Efficiency | flag                           |
|----------------|--------|----|-------|------------|--------------------------------|
| 16S rRNA       | 21A    |    | 14.73 | 81.91      | 2.1                            |
| aac            | 21A    |    | 31.13 | 87.54      | 1.98 MultipleMeltPeaks         |
| aac(6')-Ib(akz | 21A    |    | 39.06 | 80.42      | 1.88                           |
| aac(6')-Ib(akz | 21A    |    | 30.89 | 80.12      | 1.91 MultipleMeltPeaks         |
| aac(6')-Ib(akz | 21A    |    | 29.99 | 78.56      | 1.96 MultipleMeltPeaks         |
| aac(6')-II     | 21A    |    | 34.89 | 83.62      | 1.77                           |
| aac(6')I1      | 21A    |    | 41.19 | 65.2       | 1.62 MultipleMeltPeaks         |
| aacA/aphD      | 21A    |    |       |            | CurveFitFailed                 |
| aacC           | 21A    |    | 26.78 | 88.74      | 1.82                           |
| aacC1          | 21A    |    |       |            | CurveFitFailed                 |
| aacC2          | 21A    |    |       |            | NoAmplification                |
| aacC4          | 21A    |    | 32.87 | 88.53      | 1.99                           |
| aadA-01        | 21A    |    |       |            | NoAmplification                |
| aadA-02        | 21A    |    | 37.49 | 80.41      | 1.76 MultipleMeltPeaks         |
| aadA-1-01      | 21A    |    |       |            | NoAmplification                |
| aadA-1-02      | 21A    |    | 28.11 | 61.41      | 1.5 SaturationBaselineRatiolsL |
| aadA1          | 21A    |    | 35.2  | 83.35      | 1.85 MultipleMeltPeaks         |
| aadA2-01       | 21A    |    | 31.69 | 86.71      | 1.85                           |
| aadA2-02       | 21A    |    | 33.09 | 74.65      | 1.93 MultipleMeltPeaks         |
| aadA2-03       | 21A    |    |       |            | CurveFitFailed                 |
| aadA5-01       | 21A    |    | 34.65 | 88.32      | 1.85                           |
| aadA5-02       | 21A    |    | 30.15 | 88.09      | 1.92                           |
| aadA9-01       | 21A    |    | 33.62 | 85.95      | 1.88                           |
| aadA9-02       | 21A    |    |       |            | CurveFitFailed                 |
| aadD           | 21A    |    |       |            | LowEfficiency, CtIsSmall, Ci   |
| aadE           | 21A    |    |       |            | CurveFitFailed                 |
| acrA-01        | 21A    |    | 27.82 | 88.41      | 1.96 MultipleMeltPeaks         |
| acrA-02        | 21A    |    | 34.18 | 86.79      | 1.86                           |
| acrA-03        | 21A    |    | 34.76 | 89.45      | 1.77                           |
| acrA-04        | 21A    |    | 28.19 | 86.35      | 1.98 MultipleMeltPeaks         |
| acrA-05        | 21A    |    | 29.24 | 86.76      | 1.97                           |
| acrB-01        | 21A    |    | 28.41 | 86.34      | 1.86                           |
| acrF           | 21A    |    | 27.69 | 82.77      | 1.85                           |
| acrR-01        | 21A    |    | 31.59 | 83.89      | 1.94 MultipleMeltPeaks         |
| acrR-02        | 21A    |    | 35.02 | 82.94      | 1.87 MultipleMeltPeaks         |
| Actin          | 21A    |    | 21.6  | 86.85      | 1.95                           |
| adeA           | 21A    |    | 32.62 | 78.86      | 1.91 MultipleMeltPeaks         |
| ampC-01        | 21A    |    | 28.7  | 90.72      | 1.92                           |
| ampC-02        | 21A    |    | 34.73 | 88.01      | 1.81 MultipleMeltPeaks         |
| ampC-04        | 21A    |    | 28.13 | 86.44      | 1.89                           |
| ampC-05        | 21A    |    | 38    | 89.63      | 1.68                           |
| ampC-06        | 21A    |    | 38.58 | 83.85      | 1.85                           |
| ampC-07        | 21A    |    | 31.97 | 88.39      | 1.86                           |
| ampC-09        | 21A    |    | 33.62 | 88.31      | 1.77                           |
| ampC/blaDH     | 21A    |    | 28.48 | 84.02      | 1.97 MultipleMeltPeaks         |

|                            |     |       |       |                              |
|----------------------------|-----|-------|-------|------------------------------|
| aph                        | 21A |       |       | LowEfficiency, CtIsSmall, S: |
| aph(2')-Id-01              | 21A |       |       | CurveFitFailed               |
| aph(2')-Id-02              | 21A |       |       | NoAmplification              |
| aph6ia                     | 21A | 34.14 | 77.63 | 1.9 MultipleMeltPeaks        |
| aphA1(aka k <sub>2</sub> ) | 21A | 35.57 | 77.51 | 1.86 MultipleMeltPeaks       |
| bacA-01                    | 21A | 34.87 | 81.54 | 1.87 MultipleMeltPeaks       |
| bacA-02                    | 21A | 33.45 | 84.06 | 1.84 MultipleMeltPeaks       |
| BETA-globin                | 21A | 24.82 | 83.75 | 2.02                         |
| bla-ACC-1                  | 21A | 33.3  | 80.27 | 1.9                          |
| bla-L1                     | 21A | 29.23 | 85.88 | 2.01                         |
| bla1                       | 21A |       |       | CurveFitFailed               |
| blaCMY                     | 21A | 34.36 | 80.25 | 1.92                         |
| blaCMY2-01                 | 21A | 32.79 | 78.31 | 1.97                         |
| blaCMY2-02                 | 21A | 30.01 | 84.19 | 1.92                         |
| blaCTX-M-01                | 21A | 36.43 | 85.61 | 1.69 MultipleMeltPeaks       |
| blaCTX-M-02                | 21A | 30.14 | 79.26 | 1.89 MultipleMeltPeaks       |
| blaCTX-M-03                | 21A |       |       | CurveFitFailed               |
| blaCTX-M-04                | 21A | 28.37 | 88.06 | 1.88                         |
| blaCTX-M-05                | 21A | 30.54 | 76.38 | 1.77                         |
| blaCTX-M-06                | 21A |       |       | CurveFitFailed               |
| blaGES                     | 21A |       |       | LowEfficiency, CtIsSmall, S: |
| blaIMP-01                  | 21A |       |       | NoAmplification              |
| blaIMP-02                  | 21A |       |       | BadR2, LowEfficiency, CtIsS  |
| blaMOX/blaC                | 21A | 36.32 | 87.05 | 1.68 MultipleMeltPeaks       |
| blaOCH                     | 21A | 30.05 | 83.54 | 2.25 MultipleMeltPeaks       |
| blaOKP                     | 21A |       |       | NoAmplification              |
| blaOXA1/blaC               | 21A |       |       | CurveFitFailed               |
| blaOXA10-01                | 21A | 35.48 | 78.54 | 1.89                         |
| blaOXA10-02                | 21A | 37.49 | 78.42 | 1.87                         |
| blaOXY                     | 21A | 27.97 | 88.84 | 1.84                         |
| blaPAO                     | 21A | 38.19 | 84.7  | 1.78                         |
| blaPER                     | 21A | 36.17 | 70.61 | 1.74                         |
| blaPSE                     | 21A |       |       | CurveFitFailed               |
| blaROB                     | 21A |       |       | CurveFitFailed               |
| blaSFO                     | 21A | 25.65 | 86.7  | 1.93                         |
| blaSHV-01                  | 21A | 30.37 | 87.61 | 2.06 MultipleMeltPeaks       |
| blaSHV-02                  | 21A | 36.51 | 78.69 | 1.88 MultipleMeltPeaks       |
| blaTEM                     | 21A |       |       | NoAmplification              |
| blaTLA                     | 21A |       |       | CurveFitFailed               |
| blaVEB                     | 21A |       |       | NoAmplification              |
| blaVIM                     | 21A | 34.95 | 88.51 | 1.85                         |
| blaZ                       | 21A |       |       | CurveFitFailed               |
| carB                       | 21A | 32.36 | 88.41 | 1.88                         |
| catA1                      | 21A |       |       | NoAmplification              |
| catB3                      | 21A | 32.49 | 87.5  | 1.89                         |
| catB8                      | 21A | 28.86 | 81.49 | 1.95                         |

|            |     |       |       |      |                              |
|------------|-----|-------|-------|------|------------------------------|
| ceoA       | 21A | 30.25 | 85.92 | 1.93 | MultipleMeltPeaks            |
| cepA       | 21A |       |       |      | NoAmplification              |
| cfiA       | 21A | 30.9  | 87.19 | 1.89 |                              |
| cfr        | 21A |       |       |      | LowEfficiency, CtIsSmall, S: |
| cfxA       | 21A | 21.09 | 77.57 | 2.04 |                              |
| cmeA       | 21A | 44.68 | 75.92 | 1.75 | MultipleMeltPeaks            |
| cmlA1-01   | 21A |       |       |      | CurveFitFailed               |
| cmlA1-02   | 21A | 35.66 | 84.4  | 1.84 |                              |
| cmr        | 21A |       |       |      | CurveFitFailed               |
| cmx(A)     | 21A | 28.85 | 84.3  | 1.94 |                              |
| cphA-01    | 21A | 29.91 | 90.54 | 1.89 |                              |
| cphA-02    | 21A | 32.14 | 82.27 | 1.89 |                              |
| dfrA1      | 21A |       |       |      | NoAmplification              |
| dfrA12     | 21A | 35.35 | 77.58 | 1.88 |                              |
| emrD       | 21A | 30.19 | 88.76 | 1.87 |                              |
| ereA       | 21A | 37.56 | 83.2  | 1.8  |                              |
| ereB       | 21A | 32.88 | 87.58 | 1.98 | MultipleMeltPeaks            |
| erm(34)    | 21A | 31.08 | 89.86 | 1.93 |                              |
| erm(35)    | 21A |       |       |      | CurveFitFailed               |
| erm(36)    | 21A | 28.7  | 85.35 | 2    |                              |
| ermA       | 21A | 31.73 | 74.89 | 2.14 |                              |
| ermA/ermTR | 21A | 25.27 | 76.04 | 2.07 |                              |
| ermB       | 21A | 21.15 | 74.96 | 2.05 |                              |
| ermC       | 21A | 29.73 | 75.67 | 2.11 |                              |
| ermF       | 21A | 21.16 | 74.61 | 1.99 |                              |
| ermJ/ermD  | 21A |       |       |      | NoAmplification              |
| ermK-01    | 21A |       |       |      | CurveFitFailed               |
| ermK-02    | 21A | 38.2  | 85.44 | 1.63 | MultipleMeltPeaks            |
| ermT-01    | 21A |       |       |      | NoAmplification              |
| ermT-02    | 21A |       |       |      | CurveFitFailed               |
| ermX       | 21A | 23.55 | 83.63 | 1.92 |                              |
| ermY       | 21A |       |       |      | LowEfficiency, CtIsSmall, S: |
| fabK       | 21A | 21.46 | 78.69 | 2.18 |                              |
| floR       | 21A | 44.96 | 77.71 | 1.65 | MultipleMeltPeaks            |
| folA       | 21A |       |       |      | NoAmplification              |
| fosB       | 21A |       |       |      | LowEfficiency, CtIsSmall, S: |
| fosX       | 21A |       |       |      | BadR2, LowEfficiency, CtIsS  |
| fox5       | 21A | 26.66 | 85.94 | 1.96 | MultipleMeltPeaks            |
| imiR       | 21A |       |       |      | NoAmplification              |
| ImrA-01    | 21A |       |       |      | CurveFitFailed               |
| intl       | 21A | 29.4  | 84.71 | 1.93 |                              |
| intl1      | 21A | 21.05 | 87.5  | 1.97 |                              |
| IS613      | 21A | 20.98 | 79.67 | 2.04 |                              |
| lnuA-01    | 21A |       |       |      | LowEfficiency, CtIsSmall, S: |
| lnuB-01    | 21A |       |       |      | LowEfficiency, CtIsSmall, S: |
| lnuB-02    | 21A |       |       |      | CurveFitFailed               |

|               |     |       |       |      |                                          |
|---------------|-----|-------|-------|------|------------------------------------------|
| lnuC          | 21A |       |       |      | CurveFitFailed                           |
| marR-01       | 21A | 32.34 | 86.34 | 1.92 |                                          |
| matA/mel      | 21A | 20.11 | 77.72 | 2.04 |                                          |
| mdetI1        | 21A |       |       |      | NoAmplification                          |
| mdtA          | 21A | 37.19 | 81.9  | 1.61 |                                          |
| mdtE/yhiU     | 21A | 34.64 | 85.09 | 1.69 |                                          |
| mecA          | 21A |       |       |      | BadR2, LowEfficiency, CtIsS              |
| mefA          | 21A | 19.26 | 80.39 | 2    |                                          |
| mepA          | 21A | 29.81 | 80.87 | 1.92 | MultipleMeltPeaks                        |
| mexA          | 21A |       |       |      | CurveFitFailed                           |
| mexD          | 21A | 32.94 | 80.01 | 2.01 |                                          |
| mexE          | 21A | 32.58 | 87.9  | 1.93 |                                          |
| mexF          | 21A | 24.4  | 86.88 | 2.18 | MultipleMeltPeaks                        |
| mphA-01       | 21A | 28.4  | 89.19 | 1.95 |                                          |
| mphA-02       | 21A | 27.32 | 85.13 | 2.11 | MultipleMeltPeaks                        |
| mphB          | 21A |       |       |      | CurveFitFailed                           |
| mphC          | 21A | 37.54 | 61.45 | 1.98 | MultipleMeltPeaks                        |
| msrA-01       | 21A | 28.76 | 76.5  | 2.03 |                                          |
| msrC-01       | 21A |       |       |      | NoAmplification                          |
| mtrC-01       | 21A | 30.52 | 82.93 | 1.97 | MultipleMeltPeaks                        |
| mtrC-02       | 21A | 31    | 84.9  | 1.93 |                                          |
| mtrD-02       | 21A | 26.71 | 82.37 | 2.04 | MultipleMeltPeaks                        |
| mtrD-03       | 21A | 28.12 | 84.57 | 1.92 |                                          |
| NDM1          | 21A | 31.8  | 83.44 | 1.95 |                                          |
| nimE          | 21A | 38.43 | 75.18 | 2.07 | MultipleMeltPeaks                        |
| nisB          | 21A | 37.44 | 78.52 | 1.98 | MultipleMeltPeaks                        |
| oleC          | 21A | 32.84 | 91.75 | 1.82 |                                          |
| oprD          | 21A | 27.59 | 88.12 | 1.97 |                                          |
| oprJ          | 21A | 25.38 | 91.23 | 1.93 | MultipleMeltPeaks                        |
| pbp           | 21A |       |       |      | CurveFitFailed                           |
| pbp2x         | 21A | 22.11 | 75.52 | 2.13 |                                          |
| Pbp5          | 21A |       |       |      | LowEfficiency, CtIsSmall, S <sub>c</sub> |
| penA          | 21A | 35.36 | 90.33 | 1.74 | MultipleMeltPeaks                        |
| pikR1         | 21A |       |       |      | CtIsLarge, CurveFitFailed                |
| pikR2         | 21A | 28.25 | 85.47 | 2.06 |                                          |
| pmrA          | 21A | 21.53 | 79.13 | 2.09 |                                          |
| pncA          | 21A | 24.22 | 89.2  | 1.88 |                                          |
| putative mulI | 21A |       |       |      | NoAmplification                          |
| qac           | 21A | 37.89 | 79.28 | 1.85 | MultipleMeltPeaks                        |
| qacA          | 21A | 35.16 | 70.44 | 1.96 |                                          |
| qacA/qacB     | 21A | 38.3  | 61.3  | 1.65 | MultipleMeltPeaks                        |
| qacEdelta1-0  | 21A |       |       |      | NoAmplification                          |
| qacEdelta1-0  | 21A | 32.08 | 88.25 | 1.98 | MultipleMeltPeaks                        |
| qacH-01       | 21A | 28.1  | 87.68 | 1.9  |                                          |
| qacH-02       | 21A | 33.35 | 83.9  | 1.86 |                                          |
| qnrA          | 21A |       |       |      | CtIsLarge, CurveFitFailed                |

|              |     |       |       |      |                              |
|--------------|-----|-------|-------|------|------------------------------|
| rarD-02      | 21A | 34.24 | 83.18 | 1.96 |                              |
| sat4         | 21A |       |       |      | NoAmplification              |
| sdeB         | 21A |       |       |      | LowEfficiency, CtIsSmall, S: |
| spcN-01      | 21A |       |       |      | NoAmplification              |
| speA         | 21A |       |       |      | NoAmplification              |
| str          | 21A |       |       |      | NoAmplification              |
| strA         | 21A |       |       |      | CurveFitFailed               |
| strB         | 21A | 36.83 | 85.1  | 1.73 | MultipleMeltPeaks            |
| sul1         | 21A | 31.39 | 89.03 | 1.85 |                              |
| sul2         | 21A |       |       |      | CtIsLarge, CurveFitFailed    |
| sulA/foIP-01 | 21A | 19.09 | 80.62 | 2    |                              |
| sulA/foIP-03 | 21A | 18.4  | 83.59 | 2.03 |                              |
| tet(32)      | 21A | 22.52 | 81.35 | 1.95 |                              |
| tet(34)      | 21A | 32.21 | 75.64 | 2.03 |                              |
| tet(35)      | 21A | 39.38 | 77.07 | 1.95 | MultipleMeltPeaks            |
| tet(36)-A    | 21A |       |       |      | CurveFitFailed               |
| tet(36)-B    | 21A |       |       |      | LowEfficiency, CtIsSmall, C: |
| tet(37)      | 21A | 24.71 | 76.51 | 2.01 |                              |
| tetA-01      | 21A | 33.75 | 84.84 | 1.87 |                              |
| tetA-02      | 21A | 33.66 | 83.31 | 1.9  |                              |
| tetB-01      | 21A | 33.37 | 86.41 | 1.91 | MultipleMeltPeaks            |
| tetB-02      | 21A | 38.67 | 76.87 | 1.74 |                              |
| tetC-01      | 21A |       |       |      | NoAmplification              |
| tetC-02      | 21A | 28.41 | 75.99 | 2.02 |                              |
| tetD-01      | 21A |       |       |      | NoAmplification              |
| tetD-02      | 21A | 35.41 | 75.53 | 1.85 | MultipleMeltPeaks            |
| tetE         | 21A | 35.84 | 77.47 | 1.91 | MultipleMeltPeaks            |
| tetG-01      | 21A | 30.83 | 89.59 | 1.88 |                              |
| tetG-02      | 21A | 26.69 | 89.42 | 1.94 | MultipleMeltPeaks            |
| tetH         | 21A |       |       |      | CurveFitFailed               |
| tetJ         | 21A |       |       |      | LowEfficiency, CtIsSmall, S: |
| tetK         | 21A | 29.48 | 72.54 | 2    |                              |
| tetL-01      | 21A | 33.54 | 81.02 | 1.82 |                              |
| tetL-02      | 21A | 32.76 | 84.63 | 1.95 |                              |
| tetM-01      | 21A | 19.11 | 76.1  | 2.02 |                              |
| tetM-02      | 21A | 20.22 | 77.46 | 1.97 |                              |
| tetO-01      | 21A | 25.01 | 76.84 | 2.01 |                              |
| tetPA        | 21A |       |       |      | NoAmplification              |
| tetPB-01     | 21A |       |       |      | CurveFitFailed               |
| tetPB-02     | 21A | 28.63 | 84.67 | 1.98 |                              |
| tetPB-03     | 21A |       |       |      | CurveFitFailed               |
| tetPB-05     | 21A |       |       |      | CurveFitFailed               |
| tetQ         | 21A | 19.18 | 76.34 | 2.1  |                              |
| tetR-02      | 21A | 29.86 | 90.32 | 1.91 | MultipleMeltPeaks            |
| tetR-03      | 21A |       |       |      | CurveFitFailed               |
| tetS         | 21A | 38.61 | 77.9  | 1.8  | MultipleMeltPeaks            |

|             |     |       |       |      |                              |
|-------------|-----|-------|-------|------|------------------------------|
| tetT        | 21A | 30.47 | 73.56 | 2.12 |                              |
| tetU-01     | 21A |       |       |      | NoAmplification              |
| tetV        | 21A |       |       |      | CurveFitFailed               |
| tetW-01     | 21A | 24.22 | 81.81 | 1.98 |                              |
| tetX        | 21A |       |       |      | CurveFitFailed               |
| tnpA-01     | 21A |       |       |      | CurveFitFailed               |
| tnpA-02     | 21A | 32.74 | 85.36 | 1.73 |                              |
| tnpA-03     | 21A | 34.86 | 74.01 | 2.06 | MultipleMeltPeaks            |
| tnpA-04     | 21A |       |       |      | CtIsLarge, CurveFitFailed    |
| tnpA-05     | 21A | 28.34 | 80.52 | 1.94 | MultipleMeltPeaks            |
| tnpA-07     | 21A |       |       |      | CurveFitFailed               |
| tolC-01     | 21A |       |       |      | LowEfficiency, CtIsSmall, Ci |
| tolC-02     | 21A | 30.39 | 86.46 | 1.91 |                              |
| tolC-03     | 21A | 31.61 | 83.81 | 1.92 |                              |
| Tp614       | 21A | 32.38 | 83.19 | 1.92 | MultipleMeltPeaks            |
| ttgA        | 21A | 35.02 | 77.11 | 1.82 | MultipleMeltPeaks            |
| ttgB        | 21A | 34.56 | 84.73 | 1.87 | MultipleMeltPeaks            |
| vanA        | 21A |       |       |      | NoAmplification              |
| vanB-01     | 21A | 30.64 | 87.79 | 1.97 | MultipleMeltPeaks            |
| vanC-01     | 21A |       |       |      | LowEfficiency, CtIsSmall, Ci |
| vanC-02     | 21A |       |       |      | NoAmplification              |
| vanC-03     | 21A | 27.46 | 88.64 | 1.94 |                              |
| vanC1       | 21A |       |       |      | CurveFitFailed               |
| vanC2/vanC3 | 21A | 32.4  | 83.16 | 2.06 |                              |
| vanG        | 21A |       |       |      | NoAmplification              |
| vanHB       | 21A | 31.08 | 85.37 | 1.95 |                              |
| vanHD       | 21A | 31.12 | 86.52 | 1.94 |                              |
| vanRA-01    | 21A |       |       |      | CurveFitFailed               |
| vanRA-02    | 21A |       |       |      | CurveFitFailed               |
| vanRB       | 21A | 31.02 | 87.57 | 2    |                              |
| vanRC       | 21A |       |       |      | LowEfficiency, CtIsSmall, S: |
| vanRC4      | 21A |       |       |      | CurveFitFailed               |
| vanRD       | 21A |       |       |      | NoAmplification              |
| vanSA       | 21A |       |       |      | NoAmplification              |
| vanSB       | 21A | 29.09 | 74.93 | 2.03 |                              |
| vanSC-01    | 21A | 35.21 | 85.05 | 1.88 | MultipleMeltPeaks            |
| vanSC-02    | 21A |       |       |      | NoAmplification              |
| vanTC-01    | 21A |       |       |      | NoAmplification              |
| vanTC-02    | 21A | 29.85 | 86.12 | 1.82 |                              |
| vanTE       | 21A | 35.14 | 88.22 | 1.8  | MultipleMeltPeaks            |
| vanTG       | 21A | 32.91 | 75    | 2.08 |                              |
| vanWB       | 21A |       |       |      | NoAmplification              |
| vanWG       | 21A | 37    | 72.44 | 1.89 |                              |
| vanXA       | 21A |       |       |      | NoAmplification              |
| vanXB       | 21A |       |       |      | NoAmplification              |
| vanXD       | 21A | 29.92 | 75.5  | 2.05 |                              |

|              |     |       |       |      |                             |
|--------------|-----|-------|-------|------|-----------------------------|
| vanYB        | 21A | 33.5  | 74.73 | 2    |                             |
| vanYD-01     | 21A | 33.08 | 81.19 | 1.81 | MultipleMeltPeaks           |
| vanYD-02     | 21A |       |       |      | NoAmplification             |
| vatB-01      | 21A | 36.24 | 74.95 | 1.88 |                             |
| vatB-02      | 21A | 38.72 | 77.11 | 1.75 |                             |
| vatC-01      | 21A | 35.51 | 81.15 | 1.84 |                             |
| vatC-02      | 21A | 32.72 | 88.33 | 1.89 | MultipleMeltPeaks           |
| vatE-01      | 21A | 28.83 | 77.28 | 2.11 |                             |
| vatE-02      | 21A | 36.11 | 78.9  | 2.01 | MultipleMeltPeaks           |
| vgaA-01      | 21A |       |       |      | CurveFitFailed              |
| vgaA-02      | 21A |       |       |      | CurveFitFailed              |
| vgb-01       | 21A | 31.11 | 87.52 | 1.88 |                             |
| vgbB-01      | 21A | 38.61 | 77.1  | 1.78 |                             |
| vgbB-02      | 21A |       |       |      | CurveFitFailed              |
| yceE/mdtG-0  | 21A |       |       |      | BadR2, LowEfficiency, CtIsS |
| yceE/mdtG-0  | 21A |       |       |      | NoAmplification             |
| yceL/mdtH-0  | 21A | 29.55 | 87.22 | 1.93 |                             |
| yceL/mdtH-0  | 21A |       |       |      | NoAmplification             |
| yceL/mdtH-0  | 21A | 33.02 | 87.24 | 1.82 |                             |
| yidY/mdtL-01 | 21A | 28.51 | 80.21 | 1.97 |                             |
| yidY/mdtL-02 | 21A |       |       |      | CurveFitFailed              |































| Assay           | Sample | Ct | Tm    | Efficiency | flag                         |
|-----------------|--------|----|-------|------------|------------------------------|
| 16S rRNA        | 21B    |    | 16.35 | 82.44      | 1.96                         |
| aac             | 21B    |    | 32.21 | 81.02      | 2.04                         |
| aac(6')-Ib(akz) | 21B    |    |       |            | LowEfficiency, CtIsSmall, Ci |
| aac(6')-Ib(akz) | 21B    |    | 32.98 | 84.55      | 1.93 MultipleMeltPeaks       |
| aac(6')-Ib(akz) | 21B    |    | 33.74 | 80.39      | 1.9 MultipleMeltPeaks        |
| aac(6')-II      | 21B    |    | 35.98 | 80.83      | 1.55                         |
| aac(6')I1       | 21B    |    |       |            | NoAmplification              |
| aacA/aphD       | 21B    |    |       |            | CurveFitFailed               |
| aacC            | 21B    |    | 31.99 | 92.38      | 1.86                         |
| aacC1           | 21B    |    | 37.57 | 80.13      | 1.74                         |
| aacC2           | 21B    |    |       |            | NoAmplification              |
| aacC4           | 21B    |    | 32.74 | 83.58      | 1.93                         |
| aadA-01         | 21B    |    |       |            | LowEfficiency, CtIsSmall, Ci |
| aadA-02         | 21B    |    | 33.57 | 80.41      | 1.94                         |
| aadA-1-01       | 21B    |    | 33.93 | 81.27      | 1.85                         |
| aadA-1-02       | 21B    |    |       |            | NoAmplification              |
| aadA1           | 21B    |    | 35.38 | 83.07      | 1.87                         |
| aadA2-01        | 21B    |    | 37.75 | 84.89      | 1.66                         |
| aadA2-02        | 21B    |    | 31.39 | 75.45      | 2.08                         |
| aadA2-03        | 21B    |    |       |            | NoAmplification              |
| aadA5-01        | 21B    |    | 34.35 | 80.43      | 1.96 MultipleMeltPeaks       |
| aadA5-02        | 21B    |    | 36.1  | 79.11      | 1.7 MultipleMeltPeaks        |
| aadA9-01        | 21B    |    | 37.95 | 75.39      | 1.9 MultipleMeltPeaks        |
| aadA9-02        | 21B    |    |       |            | CurveFitFailed               |
| aadD            | 21B    |    |       |            | LowEfficiency, CtIsSmall, S: |
| aadE            | 21B    |    | 33.86 | 73.08      | 2.06                         |
| acrA-01         | 21B    |    | 31.01 | 88.48      | 1.89                         |
| acrA-02         | 21B    |    | 35.19 | 85.32      | 1.84 MultipleMeltPeaks       |
| acrA-03         | 21B    |    |       |            | CurveFitFailed               |
| acrA-04         | 21B    |    | 29.57 | 80.46      | 1.95                         |
| acrA-05         | 21B    |    | 31.82 | 80.11      | 1.92                         |
| acrB-01         | 21B    |    |       |            | CurveFitFailed               |
| acrF            | 21B    |    | 28.36 | 82.82      | 1.82                         |
| acrR-01         | 21B    |    | 33.02 | 81.04      | 1.93 MultipleMeltPeaks       |
| acrR-02         | 21B    |    | 36.11 | 82.84      | 1.88                         |
| Actin           | 21B    |    | 21.63 | 86.92      | 1.96                         |
| adeA            | 21B    |    | 36.03 | 76.81      | 1.91 MultipleMeltPeaks       |
| ampC-01         | 21B    |    | 32.74 | 78.2       | 1.9 MultipleMeltPeaks        |
| ampC-02         | 21B    |    | 32.79 | 82.48      | 1.95                         |
| ampC-04         | 21B    |    | 30.16 | 79.74      | 1.99 MultipleMeltPeaks       |
| ampC-05         | 21B    |    |       |            | CurveFitFailed               |
| ampC-06         | 21B    |    | 37.17 | 83.89      | 1.78 MultipleMeltPeaks       |
| ampC-07         | 21B    |    | 33.86 | 82.39      | 1.86 MultipleMeltPeaks       |
| ampC-09         | 21B    |    |       |            | LowEfficiency, CtIsSmall, Ci |
| ampC/blaDH      | 21B    |    | 30.72 | 83.78      | 1.98 MultipleMeltPeaks       |

|                          |     |       |       |      |                              |
|--------------------------|-----|-------|-------|------|------------------------------|
| aph                      | 21B |       |       |      | LowEfficiency, CtIsSmall, S: |
| aph(2')-Id-01            | 21B |       |       |      | LowEfficiency, CtIsSmall, S: |
| aph(2')-Id-02            | 21B |       |       |      | CurveFitFailed               |
| aph6ia                   | 21B | 34.73 | 79.12 | 1.91 |                              |
| aphA1(aka k <sub>ε</sub> | 21B |       |       |      | NoAmplification              |
| bacA-01                  | 21B |       |       |      | CurveFitFailed               |
| bacA-02                  | 21B | 34.05 | 88.25 | 1.78 |                              |
| BETA-globin              | 21B | 25.19 | 83.73 | 2.01 |                              |
| bla-ACC-1                | 21B | 32.57 | 83.16 | 1.92 | MultipleMeltPeaks            |
| bla-L1                   | 21B | 27.56 | 84.9  | 1.97 | MultipleMeltPeaks            |
| bla1                     | 21B |       |       |      | LowEfficiency, CtIsSmall, S: |
| blaCMY                   | 21B |       |       |      | CurveFitFailed               |
| blaCMY2-01               | 21B | 30.97 | 81.25 | 1.94 |                              |
| blaCMY2-02               | 21B | 30.6  | 82.83 | 1.94 |                              |
| blaCTX-M-01              | 21B |       |       |      | NoAmplification              |
| blaCTX-M-02              | 21B | 29.77 | 84.11 | 1.89 | MultipleMeltPeaks            |
| blaCTX-M-03              | 21B | 33.65 | 83.18 | 1.91 |                              |
| blaCTX-M-04              | 21B | 36.64 | 75.97 | 1.79 | MultipleMeltPeaks            |
| blaCTX-M-05              | 21B | 30.35 | 83.5  | 1.73 |                              |
| blaCTX-M-06              | 21B |       |       |      | CurveFitFailed               |
| blaGES                   | 21B |       |       |      | CurveFitFailed               |
| blaIMP-01                | 21B |       |       |      | CurveFitFailed               |
| blaIMP-02                | 21B | 36.53 | 78.25 | 1.85 | MultipleMeltPeaks            |
| blaMOX/blaC              | 21B | 34.18 | 88.21 | 1.9  | MultipleMeltPeaks            |
| blaOCH                   | 21B |       |       |      | NoAmplification              |
| blaOKP                   | 21B |       |       |      | NoAmplification              |
| blaOXA1/blaC             | 21B |       |       |      | NoAmplification              |
| blaOXA10-01              | 21B |       |       |      | LowEfficiency, CtIsSmall, S: |
| blaOXA10-02              | 21B |       |       |      | CurveFitFailed               |
| blaOXY                   | 21B | 43.78 | 85.01 | 1.46 | MultipleMeltPeaks            |
| blaPAO                   | 21B |       |       |      | NoAmplification              |
| blaPER                   | 21B | 35.95 | 78.89 | 1.85 |                              |
| blaPSE                   | 21B |       |       |      | NoAmplification              |
| blaROB                   | 21B |       |       |      | NoAmplification              |
| blaSFO                   | 21B | 28.5  | 86.84 | 1.92 | MultipleMeltPeaks            |
| blaSHV-01                | 21B | 32.07 | 87.74 | 1.97 | MultipleMeltPeaks            |
| blaSHV-02                | 21B | 38.28 | 79.6  | 1.83 |                              |
| blaTEM                   | 21B | 44.81 | 83.1  | 1.76 | MultipleMeltPeaks            |
| blaTLA                   | 21B |       |       |      | CurveFitFailed               |
| blaVEB                   | 21B |       |       |      | NoAmplification              |
| blaVIM                   | 21B |       |       |      | NoAmplification              |
| blaZ                     | 21B |       |       |      | LowEfficiency, CtIsSmall, C: |
| carB                     | 21B |       |       |      | CtIsLarge, CurveFitFailed    |
| catA1                    | 21B |       |       |      | NoAmplification              |
| catB3                    | 21B | 32.38 | 87.4  | 1.9  |                              |
| catB8                    | 21B | 27.19 | 81.86 | 1.97 | MultipleMeltPeaks            |

|            |     |       |       |      |                              |
|------------|-----|-------|-------|------|------------------------------|
| ceoA       | 21B | 29.09 | 83.05 | 1.91 | MultipleMeltPeaks            |
| cepA       | 21B |       |       |      | NoAmplification              |
| cfiA       | 21B | 31.33 | 87.24 | 1.91 |                              |
| cfr        | 21B |       |       |      | LowEfficiency, CtIsSmall, S: |
| cfxA       | 21B | 27.42 | 77.4  | 2.03 |                              |
| cmeA       | 21B |       |       |      | CurveFitFailed               |
| cmlA1-01   | 21B |       |       |      | CurveFitFailed               |
| cmlA1-02   | 21B |       |       |      | NoAmplification              |
| cmr        | 21B |       |       |      | CurveFitFailed               |
| cmx(A)     | 21B | 29.35 | 86.17 | 2.01 |                              |
| cphA-01    | 21B | 29.89 | 86.3  | 1.91 |                              |
| cphA-02    | 21B | 37.14 | 82.36 | 1.79 |                              |
| dfrA1      | 21B |       |       |      | NoAmplification              |
| dfrA12     | 21B | 38.67 | 79.43 | 1.77 |                              |
| emrD       | 21B |       |       |      | CurveFitFailed               |
| ereA       | 21B | 39    | 82.48 | 1.79 | MultipleMeltPeaks            |
| ereB       | 21B | 32.11 | 85.67 | 2.06 | MultipleMeltPeaks            |
| erm(34)    | 21B |       |       |      | NoAmplification              |
| erm(35)    | 21B |       |       |      | LowEfficiency, CtIsSmall, S: |
| erm(36)    | 21B | 34.77 | 87.67 | 1.81 | MultipleMeltPeaks            |
| ermA       | 21B |       |       |      | CurveFitFailed               |
| ermA/ermTR | 21B |       |       |      | NoAmplification              |
| ermB       | 21B | 27.71 | 75.03 | 2.09 |                              |
| ermC       | 21B | 28.71 | 75.85 | 2.12 |                              |
| ermF       | 21B | 29.72 | 74.36 | 1.99 |                              |
| ermJ/ermD  | 21B |       |       |      | NoAmplification              |
| ermK-01    | 21B |       |       |      | NoAmplification              |
| ermK-02    | 21B | 39.32 | 79.71 | 1.6  | MultipleMeltPeaks            |
| ermT-01    | 21B |       |       |      | NoAmplification              |
| ermT-02    | 21B |       |       |      | CurveFitFailed               |
| ermX       | 21B | 33.51 | 85.39 | 1.84 |                              |
| ermY       | 21B |       |       |      | CurveFitFailed               |
| fabK       | 21B | 26.32 | 78.86 | 2.08 |                              |
| floR       | 21B |       |       |      | NoAmplification              |
| folA       | 21B |       |       |      | NoAmplification              |
| fosB       | 21B |       |       |      | LowEfficiency, CtIsSmall, S: |
| fosX       | 21B |       |       |      | LowEfficiency, CtIsSmall, C: |
| fox5       | 21B | 26.75 | 87.21 | 1.95 | MultipleMeltPeaks            |
| imiR       | 21B |       |       |      | NoAmplification              |
| ImrA-01    | 21B |       |       |      | BadR2, LowEfficiency, CtIsS  |
| intl       | 21B | 29.23 | 84.51 | 1.95 | MultipleMeltPeaks            |
| intl1      | 21B | 20.39 | 87.04 | 2.04 |                              |
| IS613      | 21B |       |       |      | BadR2, LowEfficiency, CtIsS  |
| lnuA-01    | 21B |       |       |      | LowEfficiency, CtIsSmall, S: |
| lnuB-01    | 21B |       |       |      | CurveFitFailed               |
| lnuB-02    | 21B |       |       |      | LowEfficiency, CtIsSmall, S: |

|                |     |       |       |      |                                          |
|----------------|-----|-------|-------|------|------------------------------------------|
| lnuC           | 21B | 36.7  | 83.92 | 1.68 |                                          |
| marR-01        | 21B |       |       |      | CurveFitFailed                           |
| matA/mel       | 21B | 26.98 | 82.11 | 2.01 | MultipleMeltPeaks                        |
| mdet1          | 21B |       |       |      | NoAmplification                          |
| mdtA           | 21B |       |       |      | CtIsLarge, CurveFitFailed                |
| mdtE/yhiU      | 21B |       |       |      | NoAmplification                          |
| mecA           | 21B |       |       |      | CurveFitFailed                           |
| mefA           | 21B | 26.26 | 80.37 | 1.97 |                                          |
| mepA           | 21B | 31.72 | 83.51 | 2.04 |                                          |
| mexA           | 21B |       |       |      | NoAmplification                          |
| mexD           | 21B | 31.4  | 80.21 | 2.01 |                                          |
| mexE           | 21B | 40.7  | 82.43 | 1.68 |                                          |
| mexF           | 21B | 22.9  | 87.46 | 1.82 | MultipleMeltPeaks                        |
| mphA-01        | 21B | 31.58 | 89.23 | 1.93 |                                          |
| mphA-02        | 21B | 31.39 | 86.49 | 2.13 |                                          |
| mphB           | 21B | 36.44 | 82.09 | 1.83 |                                          |
| mphC           | 21B |       |       |      | CurveFitFailed                           |
| msrA-01        | 21B | 28.79 | 76.51 | 2.01 |                                          |
| msrC-01        | 21B |       |       |      | NoAmplification                          |
| mtrC-01        | 21B |       |       |      | CurveFitFailed                           |
| mtrC-02        | 21B | 31.31 | 84.04 | 1.96 |                                          |
| mtrD-02        | 21B | 25.78 | 85.09 | 2.04 | MultipleMeltPeaks                        |
| mtrD-03        | 21B | 33.41 | 83.94 | 1.89 |                                          |
| NDM1           | 21B |       |       |      | CurveFitFailed                           |
| nimE           | 21B | 34.49 | 75.99 | 2.06 |                                          |
| nisB           | 21B |       |       |      | CurveFitFailed                           |
| oleC           | 21B |       |       |      | CurveFitFailed                           |
| oprD           | 21B | 27.92 | 86.54 | 1.97 |                                          |
| oprJ           | 21B | 32.98 | 91.15 | 1.92 |                                          |
| pbp            | 21B | 33.88 | 82.07 | 1.92 |                                          |
| pbp2x          | 21B | 29.51 | 75.23 | 2.11 |                                          |
| Pbp5           | 21B |       |       |      | LowEfficiency, CtIsSmall, S <sub>c</sub> |
| penA           | 21B | 41.53 | 84.05 | 1.59 | MultipleMeltPeaks                        |
| pikR1          | 21B |       |       |      | NoAmplification                          |
| pikR2          | 21B | 30.01 | 84.91 | 2    |                                          |
| pmrA           | 21B | 27.07 | 79.05 | 2.06 |                                          |
| pncA           | 21B | 31.03 | 84.59 | 1.86 |                                          |
| putative multi | 21B | 31.63 | 83.96 | 1.94 |                                          |
| qac            | 21B |       |       |      | CurveFitFailed                           |
| qacA           | 21B |       |       |      | NoAmplification                          |
| qacA/qacB      | 21B |       |       |      | CurveFitFailed                           |
| qacEdelta1-0   | 21B |       |       |      | NoAmplification                          |
| qacEdelta1-0   | 21B |       |       |      | CurveFitFailed                           |
| qacH-01        | 21B | 31.04 | 86.28 | 1.91 |                                          |
| qacH-02        | 21B | 34.42 | 83.69 | 1.62 |                                          |
| qnrA           | 21B | 37.54 | 79.89 | 1.83 |                                          |



|              |     |       |       |      |                              |
|--------------|-----|-------|-------|------|------------------------------|
| rarD-02      | 21B | 34.61 | 84.74 | 1.83 |                              |
| sat4         | 21B |       |       |      | NoAmplification              |
| sdeB         | 21B |       |       |      | LowEfficiency, CtIsSmall, S: |
| spcN-01      | 21B |       |       |      | NoAmplification              |
| speA         | 21B |       |       |      | NoAmplification              |
| str          | 21B |       |       |      | NoAmplification              |
| strA         | 21B |       |       |      | BadR2, LowEfficiency, CtIsS  |
| strB         | 21B | 38.56 | 83.2  | 1.75 | MultipleMeltPeaks            |
| sul1         | 21B | 36.19 | 82.37 | 1.71 | MultipleMeltPeaks            |
| sul2         | 21B | 34.03 | 88.24 | 1.89 |                              |
| sulA/foIP-01 | 21B | 25.23 | 80.62 | 1.99 |                              |
| sulA/foIP-03 | 21B | 24.69 | 83.55 | 1.97 |                              |
| tet(32)      | 21B |       |       |      | LowEfficiency, CtIsSmall, S: |
| tet(34)      | 21B | 38.81 | 74.4  | 1.84 |                              |
| tet(35)      | 21B | 34.42 | 77.88 | 2.01 |                              |
| tet(36)-A    | 21B |       |       |      | CurveFitFailed               |
| tet(36)-B    | 21B |       |       |      | CurveFitFailed               |
| tet(37)      | 21B | 35.99 | 79.94 | 1.81 | MultipleMeltPeaks            |
| tetA-01      | 21B | 32.12 | 85    | 1.94 |                              |
| tetA-02      | 21B | 41.75 | 80.61 | 1.75 | MultipleMeltPeaks            |
| tetB-01      | 21B | 35.18 | 86.19 | 1.82 |                              |
| tetB-02      | 21B |       |       |      | CurveFitFailed               |
| tetC-01      | 21B |       |       |      | NoAmplification              |
| tetC-02      | 21B |       |       |      | LowEfficiency, CtIsSmall, S: |
| tetD-01      | 21B |       |       |      | CurveFitFailed               |
| tetD-02      | 21B |       |       |      | CurveFitFailed               |
| tetE         | 21B |       |       |      | NoAmplification              |
| tetG-01      | 21B | 34.13 | 82.39 | 1.9  | MultipleMeltPeaks            |
| tetG-02      | 21B | 28.14 | 82.31 | 1.94 | MultipleMeltPeaks            |
| tetH         | 21B |       |       |      | LowEfficiency, CtIsSmall, Ci |
| tetJ         | 21B |       |       |      | CurveFitFailed               |
| tetK         | 21B |       |       |      | CurveFitFailed               |
| tetL-01      | 21B |       |       |      | CtIsLarge, CurveFitFailed    |
| tetL-02      | 21B | 32.85 | 85.18 | 1.82 |                              |
| tetM-01      | 21B | 25.81 | 76.11 | 2    |                              |
| tetM-02      | 21B | 27.8  | 77.53 | 1.95 |                              |
| tetO-01      | 21B |       |       |      | NoAmplification              |
| tetPA        | 21B | 38.81 | 71.29 | 1.8  |                              |
| tetPB-01     | 21B |       |       |      | NoAmplification              |
| tetPB-02     | 21B | 29.88 | 84.69 | 1.93 |                              |
| tetPB-03     | 21B |       |       |      | CurveFitFailed               |
| tetPB-05     | 21B |       |       |      | CurveFitFailed               |
| tetQ         | 21B |       |       |      | LowEfficiency, CtIsSmall, S: |
| tetR-02      | 21B | 35.16 | 90.08 | 1.77 |                              |
| tetR-03      | 21B |       |       |      | LowEfficiency, CtIsSmall, S: |
| tetS         | 21B |       |       |      | LowEfficiency, CtIsSmall, S: |

|             |     |       |       |      |                              |
|-------------|-----|-------|-------|------|------------------------------|
| tetT        | 21B | 30.7  | 74.14 | 2.1  |                              |
| tetU-01     | 21B |       |       |      | LowEfficiency, CtIsSmall, Ci |
| tetV        | 21B |       |       |      | NoAmplification              |
| tetW-01     | 21B |       |       |      | CurveFitFailed               |
| tetX        | 21B |       |       |      | BadR2, LowEfficiency, CtIsS  |
| tnpA-01     | 21B |       |       |      | CurveFitFailed               |
| tnpA-02     | 21B | 32.6  | 86.65 | 1.76 |                              |
| tnpA-03     | 21B |       |       |      | NoAmplification              |
| tnpA-04     | 21B |       |       |      | CurveFitFailed               |
| tnpA-05     | 21B | 34.8  | 75.83 | 1.86 |                              |
| tnpA-07     | 21B |       |       |      | NoAmplification              |
| tolC-01     | 21B | 38.19 | 79.85 | 1.8  | MultipleMeltPeaks            |
| tolC-02     | 21B | 29.73 | 84.08 | 1.91 |                              |
| tolC-03     | 21B | 31.22 | 85.62 | 1.92 |                              |
| Tp614       | 21B | 34.68 | 75.92 | 1.86 | MultipleMeltPeaks            |
| ttgA        | 21B |       |       |      | CurveFitFailed               |
| ttgB        | 21B | 36.72 | 79.09 | 1.82 |                              |
| vanA        | 21B |       |       |      | NoAmplification              |
| vanB-01     | 21B | 34.44 | 82.46 | 1.88 |                              |
| vanC-01     | 21B |       |       |      | NoAmplification              |
| vanC-02     | 21B |       |       |      | CurveFitFailed               |
| vanC-03     | 21B | 27.45 | 85.75 | 1.92 | MultipleMeltPeaks            |
| vanC1       | 21B |       |       |      | BadR2, LowEfficiency, CtIsS  |
| vanC2/vanC3 | 21B | 32.6  | 82.69 | 2.01 |                              |
| vanG        | 21B | 39.04 | 71.89 | 1.83 |                              |
| vanHB       | 21B | 34.89 | 82.37 | 1.89 |                              |
| vanHD       | 21B | 35.89 | 82.44 | 1.85 |                              |
| vanRA-01    | 21B |       |       |      | LowEfficiency, CtIsSmall, Ci |
| vanRA-02    | 21B | 35.41 | 81.9  | 1.86 |                              |
| vanRB       | 21B | 30.19 | 87.28 | 1.96 |                              |
| vanRC       | 21B |       |       |      | CurveFitFailed               |
| vanRC4      | 21B |       |       |      | LowEfficiency, CtIsSmall, S; |
| vanRD       | 21B |       |       |      | LowEfficiency, CtIsSmall, S; |
| vanSA       | 21B |       |       |      | NoAmplification              |
| vanSB       | 21B | 28.82 | 75.03 | 2.09 |                              |
| vanSC-01    | 21B |       |       |      | CurveFitFailed               |
| vanSC-02    | 21B |       |       |      | NoAmplification              |
| vanTC-01    | 21B |       |       |      | NoAmplification              |
| vanTC-02    | 21B | 35.24 | 87.88 | 1.7  | MultipleMeltPeaks            |
| vanTE       | 21B | 40.99 | 78.05 | 1.64 | MultipleMeltPeaks            |
| vanTG       | 21B |       |       |      | NoAmplification              |
| vanWB       | 21B |       |       |      | NoAmplification              |
| vanWG       | 21B | 39.97 | 74.27 | 1.86 |                              |
| vanXA       | 21B |       |       |      | NoAmplification              |
| vanXB       | 21B |       |       |      | NoAmplification              |
| vanXD       | 21B | 30.73 | 75.35 | 2.05 |                              |

|              |     |       |       |                 |
|--------------|-----|-------|-------|-----------------|
| vanYB        | 21B | 38.21 | 81.24 | 1.83            |
| vanYD-01     | 21B | 35.13 | 80.98 | 1.78            |
| vanYD-02     | 21B |       |       | NoAmplification |
| vatB-01      | 21B |       |       | CurveFitFailed  |
| vatB-02      | 21B | 31.28 | 80.6  | 2.05            |
| vatC-01      | 21B | 37.02 | 81.14 | 1.83            |
| vatC-02      | 21B | 37.19 | 87.26 | 1.8             |
| vatE-01      | 21B | 28.2  | 77.45 | 2.16            |
| vatE-02      | 21B | 38.64 | 75.2  | 2.13            |
| vgaA-01      | 21B |       |       | CurveFitFailed  |
| vgaA-02      | 21B |       |       | CurveFitFailed  |
| vgb-01       | 21B | 38.92 | 78.34 | 1.75            |
| vgbB-01      | 21B | 40.19 | 76.03 | 1.7             |
| vgbB-02      | 21B |       |       | NoAmplification |
| yceE/mdtG-0  | 21B |       |       | CurveFitFailed  |
| yceE/mdtG-0  | 21B |       |       | CurveFitFailed  |
| yceL/mdtH-0  | 21B | 31.17 | 85.82 | 1.94            |
| yceL/mdtH-0  | 21B |       |       | NoAmplification |
| yceL/mdtH-0  | 21B |       |       | CurveFitFailed  |
| yidY/mdtL-01 | 21B | 30.87 | 82.81 | 1.96            |
| yidY/mdtL-02 | 21B |       |       | CurveFitFailed  |































| Assay          | Sample | Ct    | Tm    | Efficiency | flag              |
|----------------|--------|-------|-------|------------|-------------------|
| 16S rRNA       | 21C    |       | 20.69 | 81.76      | 2.04              |
| aac            | 21C    |       |       |            | NoAmplification   |
| aac(6')-Ib(akε | 21C    |       |       |            | NoAmplification   |
| aac(6')-Ib(akε | 21C    |       |       |            | NoAmplification   |
| aac(6')-Ib(akε | 21C    |       |       |            | NoAmplification   |
| aac(6')-II     | 21C    |       |       |            | NoAmplification   |
| aac(6')I1      | 21C    | 33.98 | 87.6  | 1.86       | MultipleMeltPeaks |
| aacA/aphD      | 21C    |       |       |            | NoAmplification   |
| aacC           | 21C    | 30.83 | 88.39 | 1.82       |                   |
| aacC1          | 21C    |       |       |            | CurveFitFailed    |
| aacC2          | 21C    |       |       |            | NoAmplification   |
| aacC4          | 21C    |       |       |            | NoAmplification   |
| aadA-01        | 21C    |       |       |            | NoAmplification   |
| aadA-02        | 21C    |       |       |            | NoAmplification   |
| aadA-1-01      | 21C    |       |       |            | NoAmplification   |
| aadA-1-02      | 21C    |       |       |            | NoAmplification   |
| aadA1          | 21C    |       |       |            | NoAmplification   |
| aadA2-01       | 21C    |       |       |            | NoAmplification   |
| aadA2-02       | 21C    |       |       |            | NoAmplification   |
| aadA2-03       | 21C    |       |       |            | NoAmplification   |
| aadA5-01       | 21C    |       |       |            | NoAmplification   |
| aadA5-02       | 21C    |       |       |            | CurveFitFailed    |
| aadA9-01       | 21C    |       |       |            | NoAmplification   |
| aadA9-02       | 21C    |       |       |            | NoAmplification   |
| aadD           | 21C    |       |       |            | NoAmplification   |
| aadE           | 21C    |       |       |            | NoAmplification   |
| acrA-01        | 21C    | 32.03 | 82.42 | 1.91       |                   |
| acrA-02        | 21C    | 36.12 | 87.33 | 1.82       |                   |
| acrA-03        | 21C    |       |       |            | NoAmplification   |
| acrA-04        | 21C    |       |       |            | CurveFitFailed    |
| acrA-05        | 21C    | 35.37 | 78.63 | 1.79       |                   |
| acrB-01        | 21C    | 32.09 | 86.07 | 1.99       |                   |
| acrF           | 21C    |       |       |            | NoAmplification   |
| acrR-01        | 21C    |       |       |            | CurveFitFailed    |
| acrR-02        | 21C    |       |       |            | NoAmplification   |
| Actin          | 21C    | 38.81 | 80.28 | 1.88       |                   |
| adeA           | 21C    | 36.81 | 87.81 | 1.74       |                   |
| ampC-01        | 21C    | 35.35 | 90.37 | 1.82       | MultipleMeltPeaks |
| ampC-02        | 21C    |       |       |            | NoAmplification   |
| ampC-04        | 21C    | 31.21 | 85.81 | 1.93       |                   |
| ampC-05        | 21C    |       |       |            | NoAmplification   |
| ampC-06        | 21C    |       |       |            | NoAmplification   |
| ampC-07        | 21C    |       |       |            | NoAmplification   |
| ampC-09        | 21C    |       |       |            | NoAmplification   |
| ampC/blaDH     | 21C    |       |       |            | CurveFitFailed    |

|                          |     |       |       |      |                 |
|--------------------------|-----|-------|-------|------|-----------------|
| aph                      | 21C |       |       |      | NoAmplification |
| aph(2')-Id-01            | 21C |       |       |      | NoAmplification |
| aph(2')-Id-02            | 21C |       |       |      | NoAmplification |
| aph6ia                   | 21C |       |       |      | NoAmplification |
| aphA1(aka k <sub>e</sub> | 21C |       |       |      | NoAmplification |
| bacA-01                  | 21C | 33.18 | 90.29 | 1.74 |                 |
| bacA-02                  | 21C |       |       |      | NoAmplification |
| BETA-globin              | 21C |       |       |      | CurveFitFailed  |
| bla-ACC-1                | 21C |       |       |      | NoAmplification |
| bla-L1                   | 21C |       |       |      | CurveFitFailed  |
| bla1                     | 21C |       |       |      | NoAmplification |
| blaCMY                   | 21C | 39.53 | 80.03 | 1.75 |                 |
| blaCMY2-01               | 21C |       |       |      | NoAmplification |
| blaCMY2-02               | 21C |       |       |      | CurveFitFailed  |
| blaCTX-M-01              | 21C |       |       |      | CurveFitFailed  |
| blaCTX-M-02              | 21C |       |       |      | NoAmplification |
| blaCTX-M-03              | 21C |       |       |      | NoAmplification |
| blaCTX-M-04              | 21C | 29.42 | 87.85 | 1.95 |                 |
| blaCTX-M-05              | 21C |       |       |      | CurveFitFailed  |
| blaCTX-M-06              | 21C |       |       |      | NoAmplification |
| blaGES                   | 21C |       |       |      | NoAmplification |
| blaIMP-01                | 21C |       |       |      | NoAmplification |
| blaIMP-02                | 21C |       |       |      | NoAmplification |
| blaMOX/blaC              | 21C |       |       |      | CurveFitFailed  |
| blaOCH                   | 21C |       |       |      | NoAmplification |
| blaOKP                   | 21C |       |       |      | NoAmplification |
| blaOXA1/blaC             | 21C |       |       |      | NoAmplification |
| blaOXA10-01              | 21C |       |       |      | NoAmplification |
| blaOXA10-02              | 21C |       |       |      | NoAmplification |
| blaOXY                   | 21C |       |       |      | NoAmplification |
| blaPAO                   | 21C |       |       |      | NoAmplification |
| blaPER                   | 21C |       |       |      | CurveFitFailed  |
| blaPSE                   | 21C |       |       |      | NoAmplification |
| blaROB                   | 21C |       |       |      | NoAmplification |
| blaSFO                   | 21C | 32.54 | 82.21 | 1.84 |                 |
| blaSHV-01                | 21C |       |       |      | NoAmplification |
| blaSHV-02                | 21C |       |       |      | NoAmplification |
| blaTEM                   | 21C | 29.64 | 79.32 | 1.99 |                 |
| blaTLA                   | 21C |       |       |      | NoAmplification |
| blaVEB                   | 21C |       |       |      | NoAmplification |
| blaVIM                   | 21C |       |       |      | NoAmplification |
| blaZ                     | 21C |       |       |      | NoAmplification |
| carB                     | 21C |       |       |      | NoAmplification |
| catA1                    | 21C |       |       |      | NoAmplification |
| catB3                    | 21C |       |       |      | NoAmplification |
| catB8                    | 21C |       |       |      | NoAmplification |

|            |     |       |       |      |                              |
|------------|-----|-------|-------|------|------------------------------|
| ceoA       | 21C |       |       |      | NoAmplification              |
| cepA       | 21C |       |       |      | NoAmplification              |
| cfiA       | 21C |       |       |      | NoAmplification              |
| cfr        | 21C |       |       |      | NoAmplification              |
| cfxA       | 21C | 26.4  | 77.35 | 2.03 |                              |
| cmeA       | 21C |       |       |      | NoAmplification              |
| cmlA1-01   | 21C |       |       |      | NoAmplification              |
| cmlA1-02   | 21C |       |       |      | NoAmplification              |
| cmr        | 21C |       |       |      | CurveFitFailed               |
| cmx(A)     | 21C | 35    | 83.54 | 1.9  |                              |
| cphA-01    | 21C |       |       |      | CurveFitFailed               |
| cphA-02    | 21C | 33.66 | 81.04 | 1.85 |                              |
| dfrA1      | 21C |       |       |      | NoAmplification              |
| dfrA12     | 21C |       |       |      | NoAmplification              |
| emrD       | 21C |       |       |      | NoAmplification              |
| ereA       | 21C |       |       |      | NoAmplification              |
| ereB       | 21C |       |       |      | NoAmplification              |
| erm(34)    | 21C |       |       |      | NoAmplification              |
| erm(35)    | 21C |       |       |      | NoAmplification              |
| erm(36)    | 21C | 36.44 | 81.19 | 1.78 |                              |
| ermA       | 21C |       |       |      | NoAmplification              |
| ermA/ermTR | 21C |       |       |      | NoAmplification              |
| ermB       | 21C | 25.26 | 74.83 | 2.01 |                              |
| ermC       | 21C |       |       |      | NoAmplification              |
| ermF       | 21C | 26.7  | 74.33 | 1.98 |                              |
| ermJ/ermD  | 21C |       |       |      | NoAmplification              |
| ermK-01    | 21C |       |       |      | NoAmplification              |
| ermK-02    | 21C |       |       |      | NoAmplification              |
| ermT-01    | 21C |       |       |      | NoAmplification              |
| ermT-02    | 21C |       |       |      | NoAmplification              |
| ermX       | 21C |       |       |      | NoAmplification              |
| ermY       | 21C |       |       |      | NoAmplification              |
| fabK       | 21C | 28.86 | 79.07 | 2.07 |                              |
| floR       | 21C |       |       |      | NoAmplification              |
| folA       | 21C |       |       |      | NoAmplification              |
| fosB       | 21C |       |       |      | LowEfficiency, CtIsSmall, S: |
| fosX       | 21C |       |       |      | NoAmplification              |
| fox5       | 21C | 34.28 | 83.17 | 1.87 |                              |
| imiR       | 21C |       |       |      | LowEfficiency, CurveFitFail  |
| lmrA-01    | 21C |       |       |      | NoAmplification              |
| intl       | 21C | 32.93 | 78.92 | 1.9  |                              |
| intl1      | 21C | 24.88 | 87.51 | 1.98 |                              |
| IS613      | 21C | 26.4  | 79.32 | 2.05 |                              |
| lnuA-01    | 21C |       |       |      | NoAmplification              |
| lnuB-01    | 21C |       |       |      | NoAmplification              |
| lnuB-02    | 21C |       |       |      | NoAmplification              |

|               |     |       |       |      |                   |
|---------------|-----|-------|-------|------|-------------------|
| lnuC          | 21C |       |       |      | NoAmplification   |
| marR-01       | 21C |       |       |      | NoAmplification   |
| matA/mel      | 21C | 23.82 | 77.53 | 2    |                   |
| mdet1         | 21C |       |       |      | NoAmplification   |
| mdtA          | 21C |       |       |      | NoAmplification   |
| mdtE/yhiU     | 21C |       |       |      | NoAmplification   |
| mecA          | 21C |       |       |      | NoAmplification   |
| mefA          | 21C | 23.61 | 80.31 | 1.93 |                   |
| mepA          | 21C |       |       |      | NoAmplification   |
| mexA          | 21C |       |       |      | NoAmplification   |
| mexD          | 21C |       |       |      | NoAmplification   |
| mexE          | 21C |       |       |      | NoAmplification   |
| mexF          | 21C | 35.48 | 86.61 | 1.88 |                   |
| mphA-01       | 21C |       |       |      | CurveFitFailed    |
| mphA-02       | 21C | 28.76 | 87.53 | 2.06 | MultipleMeltPeaks |
| mphB          | 21C |       |       |      | CurveFitFailed    |
| mphC          | 21C |       |       |      | NoAmplification   |
| msrA-01       | 21C |       |       |      | NoAmplification   |
| msrC-01       | 21C |       |       |      | NoAmplification   |
| mtrC-01       | 21C | 30.83 | 82.88 | 1.89 |                   |
| mtrC-02       | 21C | 40.27 | 84.09 | 1.68 | MultipleMeltPeaks |
| mtrD-02       | 21C | 30.61 | 85.15 | 1.94 |                   |
| mtrD-03       | 21C | 35.3  | 85.26 | 1.81 | MultipleMeltPeaks |
| NDM1          | 21C |       |       |      | NoAmplification   |
| nimE          | 21C | 40.5  | 74.83 | 1.89 |                   |
| nisB          | 21C |       |       |      | NoAmplification   |
| oleC          | 21C | 33.06 | 86.77 | 1.87 |                   |
| oprD          | 21C | 36.97 | 89.85 | 1.8  | MultipleMeltPeaks |
| oprJ          | 21C | 30.77 | 88.32 | 1.86 |                   |
| pbp           | 21C |       |       |      | NoAmplification   |
| pbp2x         | 21C |       |       |      | NoAmplification   |
| Pbp5          | 21C |       |       |      | NoAmplification   |
| penA          | 21C |       |       |      | NoAmplification   |
| pikR1         | 21C |       |       |      | NoAmplification   |
| pikR2         | 21C |       |       |      | CurveFitFailed    |
| pmrA          | 21C | 26.54 | 79.16 | 2.04 |                   |
| pncA          | 21C | 28.27 | 84.41 | 1.84 |                   |
| putative mult | 21C |       |       |      | NoAmplification   |
| qac           | 21C |       |       |      | NoAmplification   |
| qacA          | 21C |       |       |      | NoAmplification   |
| qacA/qacB     | 21C |       |       |      | NoAmplification   |
| qacEdelta1-0  | 21C |       |       |      | NoAmplification   |
| qacEdelta1-0  | 21C | 37.95 | 74.54 | 1.79 |                   |
| qacH-01       | 21C | 32.89 | 85.43 | 1.92 |                   |
| qacH-02       | 21C |       |       |      | NoAmplification   |
| qnrA          | 21C |       |       |      | NoAmplification   |

|              |     |       |       |      |                   |
|--------------|-----|-------|-------|------|-------------------|
| rarD-02      | 21C |       |       |      | NoAmplification   |
| sat4         | 21C |       |       |      | NoAmplification   |
| sdeB         | 21C |       |       |      | NoAmplification   |
| spcN-01      | 21C | 38.88 | 80.06 | 1.88 |                   |
| speA         | 21C |       |       |      | NoAmplification   |
| str          | 21C |       |       |      | NoAmplification   |
| strA         | 21C |       |       |      | NoAmplification   |
| strB         | 21C |       |       |      | NoAmplification   |
| sul1         | 21C |       |       |      | NoAmplification   |
| sul2         | 21C |       |       |      | NoAmplification   |
| sulA/foIP-01 | 21C | 24.16 | 80.43 | 1.96 |                   |
| sulA/foIP-03 | 21C | 25.9  | 83.2  | 1.96 |                   |
| tet(32)      | 21C | 29.55 | 80.78 | 1.94 |                   |
| tet(34)      | 21C | 29.02 | 75.94 | 2.03 |                   |
| tet(35)      | 21C |       |       |      | NoAmplification   |
| tet(36)-A    | 21C |       |       |      | NoAmplification   |
| tet(36)-B    | 21C |       |       |      | NoAmplification   |
| tet(37)      | 21C | 29.53 | 76.05 | 1.98 |                   |
| tetA-01      | 21C |       |       |      | NoAmplification   |
| tetA-02      | 21C |       |       |      | NoAmplification   |
| tetB-01      | 21C |       |       |      | NoAmplification   |
| tetB-02      | 21C |       |       |      | NoAmplification   |
| tetC-01      | 21C |       |       |      | NoAmplification   |
| tetC-02      | 21C | 28.88 | 75.76 | 1.98 |                   |
| tetD-01      | 21C |       |       |      | NoAmplification   |
| tetD-02      | 21C |       |       |      | NoAmplification   |
| tetE         | 21C |       |       |      | NoAmplification   |
| tetG-01      | 21C |       |       |      | NoAmplification   |
| tetG-02      | 21C | 35.26 | 75.35 | 1.94 |                   |
| tetH         | 21C |       |       |      | NoAmplification   |
| tetJ         | 21C |       |       |      | NoAmplification   |
| tetK         | 21C | 27.96 | 72.35 | 1.95 |                   |
| tetL-01      | 21C |       |       |      | NoAmplification   |
| tetL-02      | 21C |       |       |      | NoAmplification   |
| tetM-01      | 21C | 23.26 | 75.82 | 1.96 |                   |
| tetM-02      | 21C | 25.23 | 77.24 | 1.95 |                   |
| tetO-01      | 21C |       |       |      | NoAmplification   |
| tetPA        | 21C |       |       |      | CurveFitFailed    |
| tetPB-01     | 21C |       |       |      | NoAmplification   |
| tetPB-02     | 21C | 38.46 | 85.64 | 1.69 | MultipleMeltPeaks |
| tetPB-03     | 21C |       |       |      | NoAmplification   |
| tetPB-05     | 21C |       |       |      | NoAmplification   |
| tetQ         | 21C | 26.75 | 75.85 | 1.98 |                   |
| tetR-02      | 21C | 33.53 | 88.26 | 1.82 |                   |
| tetR-03      | 21C |       |       |      | NoAmplification   |
| tetS         | 21C |       |       |      | NoAmplification   |

|             |     |       |       |      |                             |
|-------------|-----|-------|-------|------|-----------------------------|
| tetT        | 21C |       |       |      | NoAmplification             |
| tetU-01     | 21C |       |       |      | NoAmplification             |
| tetV        | 21C |       |       |      | NoAmplification             |
| tetW-01     | 21C | 29.14 | 81.43 | 1.94 |                             |
| tetX        | 21C |       |       |      | NoAmplification             |
| tnpA-01     | 21C |       |       |      | NoAmplification             |
| tnpA-02     | 21C |       |       |      | NoAmplification             |
| tnpA-03     | 21C | 32.57 | 74.96 | 2.19 |                             |
| tnpA-04     | 21C |       |       |      | NoAmplification             |
| tnpA-05     | 21C |       |       |      | NoAmplification             |
| tnpA-07     | 21C |       |       |      | NoAmplification             |
| tolC-01     | 21C |       |       |      | NoAmplification             |
| tolC-02     | 21C | 36.64 | 84.62 | 1.78 |                             |
| tolC-03     | 21C |       |       |      | NoAmplification             |
| Tp614       | 21C |       |       |      | NoAmplification             |
| ttgA        | 21C |       |       |      | NoAmplification             |
| ttgB        | 21C |       |       |      | NoAmplification             |
| vanA        | 21C |       |       |      | NoAmplification             |
| vanB-01     | 21C | 38.27 | 88.39 | 1.79 | MultipleMeltPeaks           |
| vanC-01     | 21C | 38.58 | 72.37 | 1.81 |                             |
| vanC-02     | 21C |       |       |      | NoAmplification             |
| vanC-03     | 21C | 31.19 | 77.72 | 1.92 | MultipleMeltPeaks           |
| vanC1       | 21C |       |       |      | NoAmplification             |
| vanC2/vanC3 | 21C |       |       |      | NoAmplification             |
| vanG        | 21C |       |       |      | NoAmplification             |
| vanHB       | 21C |       |       |      | NoAmplification             |
| vanHD       | 21C |       |       |      | NoAmplification             |
| vanRA-01    | 21C |       |       |      | NoAmplification             |
| vanRA-02    | 21C |       |       |      | NoAmplification             |
| vanRB       | 21C | 30.17 | 87.32 | 1.86 |                             |
| vanRC       | 21C |       |       |      | NoAmplification             |
| vanRC4      | 21C |       |       |      | NoAmplification             |
| vanRD       | 21C |       |       |      | NoAmplification             |
| vanSA       | 21C |       |       |      | NoAmplification             |
| vanSB       | 21C | 27.93 | 74.84 | 2.07 |                             |
| vanSC-01    | 21C |       |       |      | NoAmplification             |
| vanSC-02    | 21C |       |       |      | NoAmplification             |
| vanTC-01    | 21C |       |       |      | NoAmplification             |
| vanTC-02    | 21C | 38.85 | 85.98 | 1.71 |                             |
| vanTE       | 21C |       |       |      | NoAmplification             |
| vanTG       | 21C |       |       |      | NoAmplification             |
| vanWB       | 21C |       |       |      | NoAmplification             |
| vanWG       | 21C |       |       |      | NoAmplification             |
| vanXA       | 21C |       |       |      | LowEfficiency, CurveFitFail |
| vanXB       | 21C |       |       |      | NoAmplification             |
| vanXD       | 21C | 28.88 | 75.26 | 2.05 |                             |

|              |     |       |       |      |                             |
|--------------|-----|-------|-------|------|-----------------------------|
| vanYB        | 21C |       |       |      | NoAmplification             |
| vanYD-01     | 21C |       |       |      | CurveFitFailed              |
| vanYD-02     | 21C |       |       |      | NoAmplification             |
| vatB-01      | 21C |       |       |      | NoAmplification             |
| vatB-02      | 21C |       |       |      | NoAmplification             |
| vatC-01      | 21C | 37.44 | 81.2  | 1.73 | MultipleMeltPeaks           |
| vatC-02      | 21C |       |       |      | NoAmplification             |
| vatE-01      | 21C | 28.04 | 76.86 | 2.15 |                             |
| vatE-02      | 21C |       |       |      | NoAmplification             |
| vgaA-01      | 21C |       |       |      | NoAmplification             |
| vgaA-02      | 21C |       |       |      | LowEfficiency, CurveFitFail |
| vgb-01       | 21C | 38.32 | 74.68 | 1.82 |                             |
| vgbB-01      | 21C |       |       |      | NoAmplification             |
| vgbB-02      | 21C |       |       |      | NoAmplification             |
| yceE/mdtG-0  | 21C |       |       |      | NoAmplification             |
| yceE/mdtG-0  | 21C |       |       |      | NoAmplification             |
| yceL/mdtH-0  | 21C | 35.37 | 83.41 | 1.73 | MultipleMeltPeaks           |
| yceL/mdtH-0  | 21C |       |       |      | NoAmplification             |
| yceL/mdtH-0  | 21C |       |       |      | NoAmplification             |
| yidY/mdtL-01 | 21C |       |       |      | CurveFitFailed              |
| yidY/mdtL-02 | 21C |       |       |      | NoAmplification             |































| Assay          | Sample | Ct | Tm    | Efficiency | flag                         |
|----------------|--------|----|-------|------------|------------------------------|
| 16S rRNA       | 22A    |    | 18.84 | 82.23      | 2.03                         |
| aac            | 22A    |    | 31.96 | 82         | 1.97 MultipleMeltPeaks       |
| aac(6')-Ib(akε | 22A    |    |       |            | NoAmplification              |
| aac(6')-Ib(akε | 22A    |    | 29.48 | 85.75      | 1.95 MultipleMeltPeaks       |
| aac(6')-Ib(akε | 22A    |    | 32.88 | 90.08      | 1.91 MultipleMeltPeaks       |
| aac(6')-II     | 22A    |    | 34.63 | 83.58      | 1.75                         |
| aac(6')I1      | 22A    |    | 35.38 | 85.29      | 1.82                         |
| aacA/aphD      | 22A    |    |       |            | NoAmplification              |
| aacC           | 22A    |    | 30.54 | 87.2       | 1.93 MultipleMeltPeaks       |
| aacC1          | 22A    |    |       |            | NoAmplification              |
| aacC2          | 22A    |    |       |            | NoAmplification              |
| aacC4          | 22A    |    | 31    | 92.32      | 1.95                         |
| aadA-01        | 22A    |    |       |            | NoAmplification              |
| aadA-02        | 22A    |    | 28.35 | 82.22      | 1.97                         |
| aadA-1-01      | 22A    |    | 36.17 | 82.01      | 1.81 MultipleMeltPeaks       |
| aadA-1-02      | 22A    |    |       |            | NoAmplification              |
| aadA1          | 22A    |    | 32.64 | 83.38      | 1.97                         |
| aadA2-01       | 22A    |    | 35.94 | 85.17      | 1.69                         |
| aadA2-02       | 22A    |    | 32.67 | 75.17      | 2.05                         |
| aadA2-03       | 22A    |    |       |            | NoAmplification              |
| aadA5-01       | 22A    |    | 36.17 | 74.95      | 1.86 MultipleMeltPeaks       |
| aadA5-02       | 22A    |    | 33.21 | 77.87      | 1.94 MultipleMeltPeaks       |
| aadA9-01       | 22A    |    | 37.43 | 83.73      | 1.81                         |
| aadA9-02       | 22A    |    |       |            | NoAmplification              |
| aadD           | 22A    |    |       |            | NoAmplification              |
| aadE           | 22A    |    |       |            | BadR2, CtlIsLarge, CurveFitI |
| acrA-01        | 22A    |    | 30.12 | 89.67      | 1.95                         |
| acrA-02        | 22A    |    | 33.98 | 88.19      | 1.87                         |
| acrA-03        | 22A    |    | 36.65 | 86.3       | 1.74 MultipleMeltPeaks       |
| acrA-04        | 22A    |    | 29.14 | 80.54      | 1.96                         |
| acrA-05        | 22A    |    | 27.7  | 88.51      | 1.99                         |
| acrB-01        | 22A    |    |       |            | NoAmplification              |
| acrF           | 22A    |    | 30.81 | 85.27      | 1.93 MultipleMeltPeaks       |
| acrR-01        | 22A    |    | 31.58 | 81.08      | 1.96                         |
| acrR-02        | 22A    |    | 34.21 | 85.8       | 1.85                         |
| Actin          | 22A    |    | 23.49 | 87.22      | 1.95 MultipleMeltPeaks       |
| adeA           | 22A    |    |       |            | NoAmplification              |
| ampC-01        | 22A    |    | 29.86 | 90.65      | 2 MultipleMeltPeaks          |
| ampC-02        | 22A    |    | 31.63 | 78.26      | 2.05                         |
| ampC-04        | 22A    |    | 32.27 | 78.5       | 1.87 MultipleMeltPeaks       |
| ampC-05        | 22A    |    |       |            | NoAmplification              |
| ampC-06        | 22A    |    | 39.15 | 80.65      | 1.83                         |
| ampC-07        | 22A    |    | 34.3  | 88.42      | 1.83                         |
| ampC-09        | 22A    |    | 36.3  | 85.81      | 1.73                         |
| ampC/blaDH     | 22A    |    | 28.81 | 83.58      | 1.99                         |

|                          |     |       |       |      |                           |
|--------------------------|-----|-------|-------|------|---------------------------|
| aph                      | 22A |       |       |      | NoAmplification           |
| aph(2')-Id-01            | 22A |       |       |      | NoAmplification           |
| aph(2')-Id-02            | 22A |       |       |      | NoAmplification           |
| aph6ia                   | 22A |       |       |      | NoAmplification           |
| aphA1(aka k <sub>e</sub> | 22A |       |       |      | NoAmplification           |
| bacA-01                  | 22A |       |       |      | NoAmplification           |
| bacA-02                  | 22A | 34.83 | 83.34 | 1.67 |                           |
| BETA-globin              | 22A | 23.68 | 83.83 | 1.99 | MultipleMeltPeaks         |
| bla-ACC-1                | 22A | 32.73 | 85.99 | 1.91 |                           |
| bla-L1                   | 22A | 29.49 | 85.33 | 1.93 |                           |
| bla1                     | 22A |       |       |      | NoAmplification           |
| blaCMY                   | 22A |       |       |      | CurveFitFailed            |
| blaCMY2-01               | 22A | 41.36 | 81.48 | 1.66 |                           |
| blaCMY2-02               | 22A | 28.13 | 84.08 | 1.95 | MultipleMeltPeaks         |
| blaCTX-M-01              | 22A | 33.22 | 82.38 | 1.93 | MultipleMeltPeaks         |
| blaCTX-M-02              | 22A | 30.36 | 84.69 | 1.89 | MultipleMeltPeaks         |
| blaCTX-M-03              | 22A |       |       |      | CtIsLarge, CurveFitFailed |
| blaCTX-M-04              | 22A | 29.66 | 89.97 | 1.88 |                           |
| blaCTX-M-05              | 22A | 31.93 | 91.59 | 1.84 |                           |
| blaCTX-M-06              | 22A |       |       |      | NoAmplification           |
| blaGES                   | 22A |       |       |      | NoAmplification           |
| blaIMP-01                | 22A |       |       |      | NoAmplification           |
| blaIMP-02                | 22A |       |       |      | CtIsLarge, CurveFitFailed |
| blaMOX/blaC              | 22A |       |       |      | NoAmplification           |
| blaOCH                   | 22A |       |       |      | NoAmplification           |
| blaOKP                   | 22A |       |       |      | NoAmplification           |
| blaOXA1/blaC             | 22A |       |       |      | NoAmplification           |
| blaOXA10-01              | 22A |       |       |      | NoAmplification           |
| blaOXA10-02              | 22A | 38.67 | 75.32 | 1.84 | MultipleMeltPeaks         |
| blaOXY                   | 22A | 31.35 | 89.87 | 1.82 |                           |
| blaPAO                   | 22A |       |       |      | NoAmplification           |
| blaPER                   | 22A |       |       |      | CurveFitFailed            |
| blaPSE                   | 22A |       |       |      | NoAmplification           |
| blaROB                   | 22A | 33.67 | 92.11 | 1.91 | MultipleMeltPeaks         |
| blaSFO                   | 22A | 30.03 | 86.11 | 1.91 |                           |
| blaSHV-01                | 22A | 33.36 | 87.8  | 1.9  |                           |
| blaSHV-02                | 22A | 37.66 | 81.78 | 1.78 |                           |
| blaTEM                   | 22A | 27.23 | 79.18 | 2.05 |                           |
| blaTLA                   | 22A |       |       |      | NoAmplification           |
| blaVEB                   | 22A |       |       |      | NoAmplification           |
| blaVIM                   | 22A |       |       |      | NoAmplification           |
| blaZ                     | 22A |       |       |      | NoAmplification           |
| carB                     | 22A | 31.93 | 88.67 | 1.9  |                           |
| catA1                    | 22A |       |       |      | NoAmplification           |
| catB3                    | 22A |       |       |      | CurveFitFailed            |
| catB8                    | 22A | 29.05 | 81.76 | 1.92 |                           |

|            |     |       |       |      |                              |
|------------|-----|-------|-------|------|------------------------------|
| ceoA       | 22A | 26.8  | 82.03 | 1.95 | MultipleMeltPeaks            |
| cepA       | 22A |       |       |      | NoAmplification              |
| cfiA       | 22A | 30.28 | 87.16 | 2.06 |                              |
| cfr        | 22A |       |       |      | NoAmplification              |
| cfxA       | 22A | 26.25 | 77.59 | 2.05 |                              |
| cmeA       | 22A | 38.86 | 82.26 | 1.81 | MultipleMeltPeaks            |
| cmlA1-01   | 22A | 39.08 | 88.29 | 1.76 | MultipleMeltPeaks            |
| cmlA1-02   | 22A | 37.08 | 88.66 | 1.84 |                              |
| cmr        | 22A | 32.98 | 78.63 | 1.91 |                              |
| cmx(A)     | 22A | 26.91 | 87    | 1.96 | MultipleMeltPeaks            |
| cphA-01    | 22A | 30.42 | 87.62 | 1.93 |                              |
| cphA-02    | 22A | 35.07 | 82.37 | 1.85 |                              |
| dfrA1      | 22A | 34.23 | 85.6  | 1.88 | MultipleMeltPeaks            |
| dfrA12     | 22A |       |       |      | CurveFitFailed               |
| emrD       | 22A | 36.13 | 91.09 | 1.75 | MultipleMeltPeaks            |
| ereA       | 22A | 32.33 | 82.51 | 1.96 |                              |
| ereB       | 22A | 36.73 | 85.62 | 1.79 |                              |
| erm(34)    | 22A |       |       |      | NoAmplification              |
| erm(35)    | 22A |       |       |      | NoAmplification              |
| erm(36)    | 22A | 35.68 | 85.07 | 1.8  |                              |
| ermA       | 22A |       |       |      | NoAmplification              |
| ermA/ermTR | 22A |       |       |      | NoAmplification              |
| ermB       | 22A | 25.56 | 74.92 | 2.14 |                              |
| ermC       | 22A | 36.4  | 82.51 | 1.91 |                              |
| ermF       | 22A |       |       |      | NoAmplification              |
| ermJ/ermD  | 22A |       |       |      | NoAmplification              |
| ermK-01    | 22A | 30.98 | 75.08 | 2.01 | MultipleMeltPeaks            |
| ermK-02    | 22A | 37.01 | 85.51 | 1.69 | MultipleMeltPeaks            |
| ermT-01    | 22A |       |       |      | NoAmplification              |
| ermT-02    | 22A | 33.38 | 79.55 | 2    |                              |
| ermX       | 22A | 35.33 | 85.8  | 1.72 | MultipleMeltPeaks            |
| ermY       | 22A |       |       |      | NoAmplification              |
| fabK       | 22A | 26.18 | 79.15 | 2.09 |                              |
| floR       | 22A |       |       |      | NoAmplification              |
| folA       | 22A | 35.69 | 80.07 | 1.83 |                              |
| fosB       | 22A |       |       |      | LowEfficiency, CtIsSmall, S: |
| fosX       | 22A |       |       |      | NoAmplification              |
| fox5       | 22A | 25.89 | 87.2  | 1.96 | MultipleMeltPeaks            |
| imiR       | 22A |       |       |      | CurveFitFailed               |
| ImrA-01    | 22A |       |       |      | NoAmplification              |
| intl       | 22A | 28.83 | 85.3  | 1.96 | MultipleMeltPeaks            |
| intl1      | 22A | 20    | 87.4  | 2.01 |                              |
| IS613      | 22A | 27.11 | 79.56 | 2.07 |                              |
| lnuA-01    | 22A |       |       |      | NoAmplification              |
| lnuB-01    | 22A |       |       |      | NoAmplification              |
| lnuB-02    | 22A |       |       |      | NoAmplification              |

|                |     |       |       |      |                           |
|----------------|-----|-------|-------|------|---------------------------|
| lnuC           | 22A | 35.78 | 83.98 | 1.7  | MultipleMeltPeaks         |
| marR-01        | 22A | 32.87 | 85.23 | 1.95 | MultipleMeltPeaks         |
| matA/mel       | 22A | 19.24 | 77.58 | 2.08 |                           |
| mdetI1         | 22A |       |       |      | NoAmplification           |
| mdtA           | 22A | 37.68 | 82.03 | 1.75 | MultipleMeltPeaks         |
| mdtE/yhiU      | 22A |       |       |      | NoAmplification           |
| mecA           | 22A |       |       |      | NoAmplification           |
| mefA           | 22A | 18.32 | 80.3  | 1.99 | MultipleMeltPeaks         |
| mepA           | 22A | 29.26 | 88.56 | 1.99 |                           |
| mexA           | 22A | 37.52 | 78.08 | 1.8  |                           |
| mexD           | 22A | 32.67 | 80.07 | 2    |                           |
| mexE           | 22A | 30.67 | 82.74 | 1.95 |                           |
| mexF           | 22A | 28.29 | 86.88 | 2.05 |                           |
| mphA-01        | 22A | 29.9  | 90.3  | 2.02 |                           |
| mphA-02        | 22A | 28.87 | 86.54 | 1.62 | MultipleMeltPeaks         |
| mphB           | 22A | 34.68 | 79.33 | 1.92 |                           |
| mphC           | 22A |       |       |      | NoAmplification           |
| msrA-01        | 22A |       |       |      | CurveFitFailed            |
| msrC-01        | 22A |       |       |      | NoAmplification           |
| mtrC-01        | 22A | 32.02 | 82.46 | 1.93 |                           |
| mtrC-02        | 22A | 33.3  | 83.8  | 1.93 |                           |
| mtrD-02        | 22A | 27.31 | 85.06 | 1.97 | MultipleMeltPeaks         |
| mtrD-03        | 22A | 27.44 | 82    | 1.85 |                           |
| NDM1           | 22A |       |       |      | CurveFitFailed            |
| nimE           | 22A |       |       |      | NoAmplification           |
| nisB           | 22A |       |       |      | NoAmplification           |
| oleC           | 22A | 31.64 | 89.91 | 1.9  |                           |
| oprD           | 22A | 27.84 | 86.81 | 1.98 | MultipleMeltPeaks         |
| oprJ           | 22A | 28.59 | 88.84 | 1.98 |                           |
| pbp            | 22A | 38.49 | 79.5  | 1.92 |                           |
| pbp2x          | 22A | 29.09 | 75.1  | 2.09 |                           |
| Pbp5           | 22A |       |       |      | NoAmplification           |
| penA           | 22A |       |       |      | NoAmplification           |
| pikR1          | 22A | 36.81 | 74.74 | 1.98 |                           |
| pikR2          | 22A | 32.98 | 85.16 | 1.95 |                           |
| pmrA           | 22A | 22.65 | 79.14 | 2.09 |                           |
| pncA           | 22A | 29.38 | 88.36 | 1.92 |                           |
| putative multi | 22A | 32.61 | 84.02 | 1.95 |                           |
| qac            | 22A |       |       |      | CurveFitFailed            |
| qacA           | 22A |       |       |      | NoAmplification           |
| qacA/qacB      | 22A |       |       |      | CurveFitFailed            |
| qacEdelta1-0   | 22A |       |       |      | NoAmplification           |
| qacEdelta1-0   | 22A | 31.59 | 78    | 1.95 | MultipleMeltPeaks         |
| qacH-01        | 22A | 31.3  | 87.89 | 1.98 |                           |
| qacH-02        | 22A | 33.36 | 83.94 | 1.68 |                           |
| qnrA           | 22A |       |       |      | CtIsLarge, CurveFitFailed |



|              |     |       |       |      |                   |
|--------------|-----|-------|-------|------|-------------------|
| rarD-02      | 22A |       |       |      | NoAmplification   |
| sat4         | 22A |       |       |      | NoAmplification   |
| sdeB         | 22A |       |       |      | NoAmplification   |
| spcN-01      | 22A |       |       |      | NoAmplification   |
| speA         | 22A |       |       |      | NoAmplification   |
| str          | 22A |       |       |      | NoAmplification   |
| strA         | 22A |       |       |      | NoAmplification   |
| strB         | 22A |       |       |      | NoAmplification   |
| sul1         | 22A | 34.34 | 88.37 | 1.73 |                   |
| sul2         | 22A | 35.64 | 87.2  | 1.72 |                   |
| sulA/foIP-01 | 22A | 20.87 | 81.63 | 2    |                   |
| sulA/foIP-03 | 22A | 23.13 | 83.36 | 1.99 |                   |
| tet(32)      | 22A |       |       |      | NoAmplification   |
| tet(34)      | 22A | 34.31 | 75.08 | 1.97 |                   |
| tet(35)      | 22A |       |       |      | NoAmplification   |
| tet(36)-A    | 22A |       |       |      | CurveFitFailed    |
| tet(36)-B    | 22A |       |       |      | NoAmplification   |
| tet(37)      | 22A | 32.98 | 86.67 | 1.82 |                   |
| tetA-01      | 22A | 30.75 | 85.06 | 1.91 |                   |
| tetA-02      | 22A | 33.81 | 87.26 | 1.83 |                   |
| tetB-01      | 22A | 32.07 | 86.07 | 1.95 |                   |
| tetB-02      | 22A | 32.55 | 77.83 | 1.92 |                   |
| tetC-01      | 22A |       |       |      | NoAmplification   |
| tetC-02      | 22A | 38.91 | 75.81 | 1.84 |                   |
| tetD-01      | 22A |       |       |      | NoAmplification   |
| tetD-02      | 22A | 34.7  | 76.94 | 1.95 |                   |
| tetE         | 22A | 33    | 86.06 | 1.91 |                   |
| tetG-01      | 22A | 37.96 | 85.48 | 1.71 | MultipleMeltPeaks |
| tetG-02      | 22A | 36.49 | 80.83 | 1.83 | MultipleMeltPeaks |
| tetH         | 22A |       |       |      | NoAmplification   |
| tetJ         | 22A |       |       |      | NoAmplification   |
| tetK         | 22A |       |       |      | NoAmplification   |
| tetL-01      | 22A | 38.88 | 80.8  | 1.7  | MultipleMeltPeaks |
| tetL-02      | 22A | 34.64 | 85.24 | 1.69 |                   |
| tetM-01      | 22A | 19.74 | 76.34 | 2.02 |                   |
| tetM-02      | 22A | 20.46 | 77.84 | 2.01 |                   |
| tetO-01      | 22A | 24.02 | 77    | 2.03 |                   |
| tetPA        | 22A |       |       |      | NoAmplification   |
| tetPB-01     | 22A | 42    | 78.21 | 1.79 | MultipleMeltPeaks |
| tetPB-02     | 22A | 28.4  | 85.7  | 2    |                   |
| tetPB-03     | 22A |       |       |      | NoAmplification   |
| tetPB-05     | 22A |       |       |      | NoAmplification   |
| tetQ         | 22A | 27.43 | 75.95 | 2.01 |                   |
| tetR-02      | 22A | 32.21 | 89.21 | 1.86 |                   |
| tetR-03      | 22A |       |       |      | NoAmplification   |
| tetS         | 22A |       |       |      | CurveFitFailed    |

|             |     |       |       |      |                   |
|-------------|-----|-------|-------|------|-------------------|
| tetT        | 22A |       |       |      | NoAmplification   |
| tetU-01     | 22A |       |       |      | NoAmplification   |
| tetV        | 22A |       |       |      | NoAmplification   |
| tetW-01     | 22A | 28.58 | 81.69 | 1.98 |                   |
| tetX        | 22A |       |       |      | NoAmplification   |
| tnpA-01     | 22A | 25.69 | 85.91 | 1.94 |                   |
| tnpA-02     | 22A | 33    | 85.28 | 1.76 |                   |
| tnpA-03     | 22A |       |       |      | CurveFitFailed    |
| tnpA-04     | 22A |       |       |      | NoAmplification   |
| tnpA-05     | 22A | 28.95 | 80.71 | 1.94 |                   |
| tnpA-07     | 22A |       |       |      | NoAmplification   |
| tolC-01     | 22A |       |       |      | NoAmplification   |
| tolC-02     | 22A | 30.72 | 87.69 | 1.95 |                   |
| tolC-03     | 22A | 29.72 | 85.93 | 1.95 |                   |
| Tp614       | 22A | 36.85 | 73.29 | 1.75 | MultipleMeltPeaks |
| ttgA        | 22A | 39.75 | 66.53 | 1.89 | MultipleMeltPeaks |
| ttgB        | 22A | 35.29 | 87.06 | 1.91 | MultipleMeltPeaks |
| vanA        | 22A |       |       |      | NoAmplification   |
| vanB-01     | 22A | 32.83 | 86.21 | 1.94 |                   |
| vanC-01     | 22A |       |       |      | NoAmplification   |
| vanC-02     | 22A |       |       |      | NoAmplification   |
| vanC-03     | 22A | 26.55 | 85.39 | 1.95 |                   |
| vanC1       | 22A |       |       |      | NoAmplification   |
| vanC2/vanC3 | 22A | 32.45 | 82.73 | 2.07 |                   |
| vanG        | 22A |       |       |      | NoAmplification   |
| vanHB       | 22A |       |       |      | NoAmplification   |
| vanHD       | 22A | 35.35 | 79.3  | 1.86 |                   |
| vanRA-01    | 22A | 37.46 | 79.93 | 1.74 | MultipleMeltPeaks |
| vanRA-02    | 22A |       |       |      | NoAmplification   |
| vanRB       | 22A | 30.91 | 87.52 | 2    |                   |
| vanRC       | 22A |       |       |      | NoAmplification   |
| vanRC4      | 22A |       |       |      | NoAmplification   |
| vanRD       | 22A |       |       |      | NoAmplification   |
| vanSA       | 22A |       |       |      | NoAmplification   |
| vanSB       | 22A | 37.13 | 74.9  | 1.93 |                   |
| vanSC-01    | 22A | 30.25 | 83.99 | 1.98 |                   |
| vanSC-02    | 22A |       |       |      | NoAmplification   |
| vanTC-01    | 22A |       |       |      | NoAmplification   |
| vanTC-02    | 22A | 36.49 | 86.17 | 1.61 |                   |
| vanTE       | 22A | 33.37 | 88.09 | 1.94 | MultipleMeltPeaks |
| vanTG       | 22A |       |       |      | NoAmplification   |
| vanWB       | 22A |       |       |      | NoAmplification   |
| vanWG       | 22A |       |       |      | NoAmplification   |
| vanXA       | 22A |       |       |      | CurveFitFailed    |
| vanXB       | 22A |       |       |      | NoAmplification   |
| vanXD       | 22A | 29.8  | 75.68 | 2.04 |                   |

|              |     |       |       |      |                           |
|--------------|-----|-------|-------|------|---------------------------|
| vanYB        | 22A | 36.3  | 81.25 | 1.86 | MultipleMeltPeaks         |
| vanYD-01     | 22A | 33.11 | 82.57 | 1.86 |                           |
| vanYD-02     | 22A | 36.76 | 74.41 | 1.9  |                           |
| vatB-01      | 22A |       |       |      | NoAmplification           |
| vatB-02      | 22A | 35.37 | 77.47 | 1.87 |                           |
| vatC-01      | 22A |       |       |      | NoAmplification           |
| vatC-02      | 22A | 36.54 | 86.19 | 1.85 |                           |
| vatE-01      | 22A | 29.35 | 77    | 2.11 |                           |
| vatE-02      | 22A |       |       |      | NoAmplification           |
| vgaA-01      | 22A |       |       |      | CurveFitFailed            |
| vgaA-02      | 22A |       |       |      | CurveFitFailed            |
| vgb-01       | 22A | 42.11 | 79.47 | 1.64 | MultipleMeltPeaks         |
| vgbB-01      | 22A | 37.74 | 75.97 | 1.62 | MultipleMeltPeaks         |
| vgbB-02      | 22A |       |       |      | NoAmplification           |
| yceE/mdtG-0  | 22A |       |       |      | CtIsLarge, CurveFitFailed |
| yceE/mdtG-0  | 22A | 34.93 | 80.78 | 1.94 |                           |
| yceL/mdtH-0  | 22A | 27.51 | 80.54 | 1.98 |                           |
| yceL/mdtH-0  | 22A |       |       |      | NoAmplification           |
| yceL/mdtH-0  | 22A | 36.19 | 77.35 | 1.82 | MultipleMeltPeaks         |
| yidY/mdtL-01 | 22A | 30.53 | 85.11 | 1.98 | MultipleMeltPeaks         |
| yidY/mdtL-02 | 22A | 36.52 | 92.57 | 1.75 | MultipleMeltPeaks         |































| Assay          | Sample | Ct | Tm    | Efficiency | flag                   |
|----------------|--------|----|-------|------------|------------------------|
| 16S rRNA       | 22B    |    | 20.45 | 82.05      | 1.95                   |
| aac            | 22B    |    | 28.25 | 86.11      | 1.94 MultipleMeltPeaks |
| aac(6')-Ib(akε | 22B    |    |       |            | NoAmplification        |
| aac(6')-Ib(akε | 22B    |    | 29.19 | 85.63      | 1.97                   |
| aac(6')-Ib(akε | 22B    |    | 31.36 | 86.13      | 2.02 MultipleMeltPeaks |
| aac(6')-II     | 22B    |    | 30.81 | 83.8       | 1.87                   |
| aac(6')I1      | 22B    |    |       |            | NoAmplification        |
| aacA/aphD      | 22B    |    | 32.9  | 81.89      | 1.98                   |
| aacC           | 22B    |    | 30.81 | 91.82      | 1.89                   |
| aacC1          | 22B    |    |       |            | NoAmplification        |
| aacC2          | 22B    |    |       |            | NoAmplification        |
| aacC4          | 22B    |    | 32.57 | 88.24      | 1.97                   |
| aadA-01        | 22B    |    |       |            | CurveFitFailed         |
| aadA-02        | 22B    |    | 34.5  | 80.24      | 1.93                   |
| aadA-1-01      | 22B    |    | 33.66 | 81.32      | 1.89                   |
| aadA-1-02      | 22B    |    |       |            | NoAmplification        |
| aadA1          | 22B    |    | 30.38 | 83.44      | 2                      |
| aadA2-01       | 22B    |    | 39.24 | 81.94      | 1.61 MultipleMeltPeaks |
| aadA2-02       | 22B    |    | 31.17 | 75.45      | 2.04                   |
| aadA2-03       | 22B    |    |       |            | NoAmplification        |
| aadA5-01       | 22B    |    | 33.79 | 88.41      | 1.87                   |
| aadA5-02       | 22B    |    | 29.5  | 86.23      | 1.95 MultipleMeltPeaks |
| aadA9-01       | 22B    |    | 35.81 | 84.73      | 1.88 MultipleMeltPeaks |
| aadA9-02       | 22B    |    | 33.51 | 79.02      | 1.95                   |
| aadD           | 22B    |    |       |            | NoAmplification        |
| aadE           | 22B    |    | 29.61 | 72.01      | 2.05                   |
| acrA-01        | 22B    |    | 28.73 | 88.61      | 1.96                   |
| acrA-02        | 22B    |    | 34.49 | 91.27      | 1.78 MultipleMeltPeaks |
| acrA-03        | 22B    |    |       |            | CurveFitFailed         |
| acrA-04        | 22B    |    | 27.13 | 84.75      | 1.96                   |
| acrA-05        | 22B    |    | 28.04 | 88.49      | 1.97                   |
| acrB-01        | 22B    |    | 30.56 | 82.19      | 1.92                   |
| acrF           | 22B    |    | 28.37 | 81.94      | 1.89 MultipleMeltPeaks |
| acrR-01        | 22B    |    | 31.45 | 85.87      | 1.93 MultipleMeltPeaks |
| acrR-02        | 22B    |    | 32.5  | 82.97      | 1.94 MultipleMeltPeaks |
| Actin          | 22B    |    | 19.67 | 87.08      | 1.95                   |
| adeA           | 22B    |    | 36.59 | 88.04      | 1.86                   |
| ampC-01        | 22B    |    | 29.58 | 84.46      | 2.02                   |
| ampC-02        | 22B    |    |       |            | CurveFitFailed         |
| ampC-04        | 22B    |    | 28.54 | 79.16      | 1.85 MultipleMeltPeaks |
| ampC-05        | 22B    |    |       |            | NoAmplification        |
| ampC-06        | 22B    |    | 31.73 | 86.24      | 1.91                   |
| ampC-07        | 22B    |    | 32.22 | 88.34      | 1.87                   |
| ampC-09        | 22B    |    |       |            | NoAmplification        |
| ampC/blaDH     | 22B    |    | 27.03 | 85.08      | 2                      |

|                            |     |       |       |                        |
|----------------------------|-----|-------|-------|------------------------|
| aph                        | 22B |       |       | NoAmplification        |
| aph(2')-Id-01              | 22B |       |       | NoAmplification        |
| aph(2')-Id-02              | 22B |       |       | NoAmplification        |
| aph6ia                     | 22B | 37.15 | 78.76 | 2.16                   |
| aphA1(aka k <sub>a</sub> ) | 22B | 41.39 | 77.88 | 1.79 MultipleMeltPeaks |
| bacA-01                    | 22B | 33.41 | 83.82 | 1.96                   |
| bacA-02                    | 22B | 31.16 | 88.22 | 1.88                   |
| BETA-globin                | 22B | 20.24 | 83.94 | 1.97                   |
| bla-ACC-1                  | 22B | 31.43 | 85.98 | 1.95 MultipleMeltPeaks |
| bla-L1                     | 22B | 26.62 | 85.06 | 1.93 MultipleMeltPeaks |
| bla1                       | 22B |       |       | NoAmplification        |
| blaCMY                     | 22B | 40.06 | 86.62 | 1.52                   |
| blaCMY2-01                 | 22B | 30.59 | 85.33 | 1.97                   |
| blaCMY2-02                 | 22B | 26.6  | 85.11 | 2.01 MultipleMeltPeaks |
| blaCTX-M-01                | 22B |       |       | NoAmplification        |
| blaCTX-M-02                | 22B | 28.17 | 83.8  | 1.91                   |
| blaCTX-M-03                | 22B |       |       | NoAmplification        |
| blaCTX-M-04                | 22B | 30.23 | 82.8  | 1.98 MultipleMeltPeaks |
| blaCTX-M-05                | 22B |       |       | CurveFitFailed         |
| blaCTX-M-06                | 22B | 42.68 | 79.26 | 1.88 MultipleMeltPeaks |
| blaGES                     | 22B |       |       | NoAmplification        |
| blaIMP-01                  | 22B | 33.96 | 77.58 | 1.95                   |
| blaIMP-02                  | 22B | 37.69 | 78.74 | 1.87 MultipleMeltPeaks |
| blaMOX/blaC                | 22B | 34.38 | 82.28 | 1.9                    |
| blaOCH                     | 22B |       |       | NoAmplification        |
| blaOKP                     | 22B |       |       | NoAmplification        |
| blaOXA1/blaC               | 22B |       |       | NoAmplification        |
| blaOXA10-01                | 22B | 35.12 | 78.58 | 1.98                   |
| blaOXA10-02                | 22B |       |       | NoAmplification        |
| blaOXY                     | 22B | 32.42 | 86.96 | 1.8 MultipleMeltPeaks  |
| blaPAO                     | 22B |       |       | NoAmplification        |
| blaPER                     | 22B | 38.89 | 69.82 | 1.68 MultipleMeltPeaks |
| blaPSE                     | 22B |       |       | NoAmplification        |
| blaROB                     | 22B |       |       | NoAmplification        |
| blaSFO                     | 22B | 29.93 | 86.8  | 1.91                   |
| blaSHV-01                  | 22B | 30.48 | 89.39 | 2.21                   |
| blaSHV-02                  | 22B | 34.21 | 78.61 | 2.02                   |
| blaTEM                     | 22B | 27.07 | 79.16 | 2.05                   |
| blaTLA                     | 22B |       |       | NoAmplification        |
| blaVEB                     | 22B |       |       | NoAmplification        |
| blaVIM                     | 22B | 38.13 | 83.91 | 2.03                   |
| blaZ                       | 22B |       |       | NoAmplification        |
| carB                       | 22B | 42.04 | 82.32 | 1.62                   |
| catA1                      | 22B |       |       | NoAmplification        |
| catB3                      | 22B | 33.16 | 87.52 | 1.94                   |
| catB8                      | 22B | 27.15 | 82.09 | 1.93 MultipleMeltPeaks |

|            |     |       |       |      |                              |
|------------|-----|-------|-------|------|------------------------------|
| ceoA       | 22B | 25.88 | 82.03 | 1.95 | MultipleMeltPeaks            |
| cepA       | 22B |       |       |      | CurveFitFailed               |
| cfiA       | 22B | 29.05 | 84.68 | 2    | MultipleMeltPeaks            |
| cfr        | 22B |       |       |      | NoAmplification              |
| cfxA       | 22B | 27.39 | 77.44 | 2.09 |                              |
| cmeA       | 22B |       |       |      | NoAmplification              |
| cmlA1-01   | 22B | 37.6  | 80.14 | 1.93 |                              |
| cmlA1-02   | 22B | 36.37 | 81.66 | 1.94 |                              |
| cmr        | 22B | 35.99 | 78.42 | 1.85 |                              |
| cmx(A)     | 22B | 25.64 | 86.51 | 2.03 | MultipleMeltPeaks            |
| cphA-01    | 22B | 28.55 | 88.45 | 1.95 | MultipleMeltPeaks            |
| cphA-02    | 22B | 30.08 | 82.34 | 1.9  |                              |
| dfrA1      | 22B | 38.39 | 78.34 | 1.74 |                              |
| dfrA12     | 22B | 34.67 | 81.83 | 1.8  | MultipleMeltPeaks            |
| emrD       | 22B | 31.78 | 89.13 | 1.86 |                              |
| ereA       | 22B | 33.35 | 82.67 | 1.94 |                              |
| ereB       | 22B | 32.78 | 85.63 | 2.04 |                              |
| erm(34)    | 22B |       |       |      | NoAmplification              |
| erm(35)    | 22B |       |       |      | NoAmplification              |
| erm(36)    | 22B | 34.96 | 88.8  | 1.84 |                              |
| ermA       | 22B |       |       |      | NoAmplification              |
| ermA/ermTR | 22B |       |       |      | NoAmplification              |
| ermB       | 22B | 29.27 | 74.72 | 2.08 |                              |
| ermC       | 22B |       |       |      | NoAmplification              |
| ermF       | 22B |       |       |      | NoAmplification              |
| ermJ/ermD  | 22B |       |       |      | NoAmplification              |
| ermK-01    | 22B | 37.39 | 73.1  | 1.82 | MultipleMeltPeaks            |
| ermK-02    | 22B | 35.08 | 85.76 | 1.66 |                              |
| ermT-01    | 22B |       |       |      | NoAmplification              |
| ermT-02    | 22B | 36.73 | 79.59 | 1.87 |                              |
| ermX       | 22B | 33.65 | 86.7  | 1.81 | MultipleMeltPeaks            |
| ermY       | 22B |       |       |      | CurveFitFailed               |
| fabK       | 22B | 24.76 | 79.07 | 2.11 |                              |
| floR       | 22B |       |       |      | NoAmplification              |
| folA       | 22B | 39.42 | 81.72 | 1.66 |                              |
| fosB       | 22B |       |       |      | LowEfficiency, CtIsSmall, S: |
| fosX       | 22B |       |       |      | NoAmplification              |
| fox5       | 22B | 24.05 | 86.33 | 1.95 |                              |
| imiR       | 22B |       |       |      | NoAmplification              |
| ImrA-01    | 22B | 36.11 | 78.49 | 1.96 | MultipleMeltPeaks            |
| intl       | 22B | 28.55 | 84.54 | 1.95 |                              |
| intl1      | 22B | 18.75 | 87.13 | 2.06 |                              |
| IS613      | 22B | 28.22 | 79.42 | 2.03 |                              |
| lnuA-01    | 22B |       |       |      | NoAmplification              |
| lnuB-01    | 22B |       |       |      | NoAmplification              |
| lnuB-02    | 22B |       |       |      | NoAmplification              |

|                |     |       |       |      |                   |
|----------------|-----|-------|-------|------|-------------------|
| lnuC           | 22B | 33.64 | 83.98 | 1.71 |                   |
| marR-01        | 22B | 30.84 | 85.21 | 1.95 | MultipleMeltPeaks |
| matA/mel       | 22B | 23.01 | 77.54 | 2    |                   |
| mdet1          | 22B |       |       |      | NoAmplification   |
| mdtA           | 22B | 33.81 | 81.79 | 1.71 |                   |
| mdtE/yhiU      | 22B |       |       |      | CurveFitFailed    |
| mecA           | 22B |       |       |      | NoAmplification   |
| mefA           | 22B | 22.26 | 80.28 | 1.92 | MultipleMeltPeaks |
| mepA           | 22B | 32.17 | 84.71 | 1.96 |                   |
| mexA           | 22B | 36.2  | 78.11 | 1.92 |                   |
| mexD           | 22B | 30.75 | 80.16 | 1.99 |                   |
| mexE           | 22B | 29.92 | 83.16 | 1.96 |                   |
| mexF           | 22B | 26.25 | 84.15 | 2.09 | MultipleMeltPeaks |
| mphA-01        | 22B | 29.19 | 91.15 | 1.89 | MultipleMeltPeaks |
| mphA-02        | 22B | 28.08 | 86.55 | 2.12 |                   |
| mphB           | 22B | 38.69 | 74.17 | 1.75 | MultipleMeltPeaks |
| mphC           | 22B | 38.08 | 79.14 | 1.57 | MultipleMeltPeaks |
| msrA-01        | 22B |       |       |      | NoAmplification   |
| msrC-01        | 22B |       |       |      | NoAmplification   |
| mtrC-01        | 22B |       |       |      | NoAmplification   |
| mtrC-02        | 22B | 31.12 | 84.14 | 1.96 |                   |
| mtrD-02        | 22B | 25.54 | 85.1  | 1.96 |                   |
| mtrD-03        | 22B | 30.5  | 80.09 | 1.79 | MultipleMeltPeaks |
| NDM1           | 22B | 32.75 | 82.15 | 1.93 |                   |
| nimE           | 22B | 34.11 | 75.85 | 1.97 |                   |
| nisB           | 22B | 35.84 | 76.25 | 1.99 |                   |
| oleC           | 22B | 33.94 | 84.01 | 1.87 |                   |
| oprD           | 22B | 26.98 | 87.87 | 2.02 |                   |
| oprJ           | 22B |       |       |      | NoAmplification   |
| pbp            | 22B | 38.24 | 79.61 | 2.11 |                   |
| pbp2x          | 22B | 25.57 | 75.28 | 2.13 |                   |
| Pbp5           | 22B |       |       |      | NoAmplification   |
| penA           | 22B | 34.55 | 90.22 | 1.75 |                   |
| pikR1          | 22B |       |       |      | CurveFitFailed    |
| pikR2          | 22B | 28.48 | 84.7  | 2.09 |                   |
| pmrA           | 22B | 24.65 | 79.45 | 2.14 |                   |
| pncA           | 22B | 30.28 | 84.9  | 1.9  | MultipleMeltPeaks |
| putative multi | 22B | 28.81 | 84.1  | 1.95 |                   |
| qac            | 22B | 36.14 | 78.13 | 1.87 |                   |
| qacA           | 22B |       |       |      | NoAmplification   |
| qacA/qacB      | 22B | 39.09 | 84.6  | 1.41 | MultipleMeltPeaks |
| qacEdelta1-0   | 22B |       |       |      | CurveFitFailed    |
| qacEdelta1-0   | 22B | 35.26 | 74.54 | 1.86 | MultipleMeltPeaks |
| qacH-01        | 22B | 29.25 | 85.96 | 1.96 |                   |
| qacH-02        | 22B | 32.99 | 83.9  | 1.71 |                   |
| qnrA           | 22B |       |       |      | CurveFitFailed    |

|              |     |       |       |      |                           |
|--------------|-----|-------|-------|------|---------------------------|
| rarD-02      | 22B | 32.48 | 85.71 | 1.99 |                           |
| sat4         | 22B | 29.66 | 74.9  | 1.98 |                           |
| sdeB         | 22B |       |       |      | NoAmplification           |
| spcN-01      | 22B |       |       |      | CurveFitFailed            |
| speA         | 22B |       |       |      | NoAmplification           |
| str          | 22B |       |       |      | NoAmplification           |
| strA         | 22B |       |       |      | NoAmplification           |
| strB         | 22B | 29.32 | 83.69 | 1.93 |                           |
| sul1         | 22B | 30.65 | 89.58 | 1.87 |                           |
| sul2         | 22B |       |       |      | CtIsLarge, CurveFitFailed |
| sulA/foIP-01 | 22B | 25.57 | 81.51 | 1.99 |                           |
| sulA/foIP-03 | 22B | 23.42 | 83.14 | 1.96 |                           |
| tet(32)      | 22B |       |       |      | NoAmplification           |
| tet(34)      | 22B | 39.01 | 73.93 | 1.84 | MultipleMeltPeaks         |
| tet(35)      | 22B | 34.25 | 77.25 | 1.99 | MultipleMeltPeaks         |
| tet(36)-A    | 22B | 35.49 | 83.02 | 1.83 |                           |
| tet(36)-B    | 22B |       |       |      | NoAmplification           |
| tet(37)      | 22B | 28.64 | 84.11 | 1.96 | MultipleMeltPeaks         |
| tetA-01      | 22B | 28.68 | 85.03 | 1.89 |                           |
| tetA-02      | 22B | 34.72 | 87.27 | 1.8  |                           |
| tetB-01      | 22B | 30.35 | 87.81 | 1.92 |                           |
| tetB-02      | 22B |       |       |      | CurveFitFailed            |
| tetC-01      | 22B |       |       |      | NoAmplification           |
| tetC-02      | 22B |       |       |      | CurveFitFailed            |
| tetD-01      | 22B |       |       |      | NoAmplification           |
| tetD-02      | 22B | 33.05 | 76.71 | 2.07 |                           |
| tetE         | 22B |       |       |      | NoAmplification           |
| tetG-01      | 22B | 32.05 | 85.08 | 1.95 | MultipleMeltPeaks         |
| tetG-02      | 22B | 33.78 | 87.11 | 2    |                           |
| tetH         | 22B |       |       |      | NoAmplification           |
| tetJ         | 22B | 44.01 | 80.19 | 1.71 |                           |
| tetK         | 22B |       |       |      | NoAmplification           |
| tetL-01      | 22B | 33.68 | 80.83 | 1.87 |                           |
| tetL-02      | 22B | 30.09 | 85.11 | 1.89 |                           |
| tetM-01      | 22B | 24.49 | 75.86 | 1.98 |                           |
| tetM-02      | 22B | 25.53 | 77.57 | 2    |                           |
| tetO-01      | 22B | 26.6  | 76.87 | 2.03 |                           |
| tetPA        | 22B |       |       |      | NoAmplification           |
| tetPB-01     | 22B |       |       |      | NoAmplification           |
| tetPB-02     | 22B | 27.61 | 84.81 | 1.98 |                           |
| tetPB-03     | 22B |       |       |      | NoAmplification           |
| tetPB-05     | 22B |       |       |      | NoAmplification           |
| tetQ         | 22B | 27.45 | 75.88 | 2    |                           |
| tetR-02      | 22B | 30.88 | 89.99 | 1.91 | MultipleMeltPeaks         |
| tetR-03      | 22B |       |       |      | NoAmplification           |
| tetS         | 22B | 32.51 | 85.23 | 2.08 |                           |

|             |     |       |       |      |                             |
|-------------|-----|-------|-------|------|-----------------------------|
| tetT        | 22B |       |       |      | NoAmplification             |
| tetU-01     | 22B |       |       |      | NoAmplification             |
| tetV        | 22B |       |       |      | NoAmplification             |
| tetW-01     | 22B | 28.56 | 81.68 | 1.97 |                             |
| tetX        | 22B |       |       |      | BadR2, CtIsSmall, Saturatio |
| tnpA-01     | 22B | 25.61 | 85.91 | 1.91 |                             |
| tnpA-02     | 22B | 32.39 | 87.99 | 1.78 | MultipleMeltPeaks           |
| tnpA-03     | 22B | 32.57 | 75.27 | 2.18 |                             |
| tnpA-04     | 22B | 34.01 | 84.29 | 1.84 |                             |
| tnpA-05     | 22B | 36.54 | 82.65 | 1.73 | MultipleMeltPeaks           |
| tnpA-07     | 22B |       |       |      | NoAmplification             |
| tolC-01     | 22B | 30.24 | 79.67 | 1.92 |                             |
| tolC-02     | 22B | 28.79 | 86.84 | 1.99 | MultipleMeltPeaks           |
| tolC-03     | 22B | 28.9  | 85.65 | 1.96 |                             |
| Tp614       | 22B | 29.81 | 83.46 | 1.94 |                             |
| ttgA        | 22B | 35.41 | 83.69 | 1.85 | MultipleMeltPeaks           |
| ttgB        | 22B | 34.17 | 84.69 | 1.92 | MultipleMeltPeaks           |
| vanA        | 22B |       |       |      | NoAmplification             |
| vanB-01     | 22B | 30.01 | 84.83 | 1.98 |                             |
| vanC-01     | 22B |       |       |      | CurveFitFailed              |
| vanC-02     | 22B |       |       |      | NoAmplification             |
| vanC-03     | 22B | 24.9  | 85.63 | 1.93 |                             |
| vanC1       | 22B |       |       |      | NoAmplification             |
| vanC2/vanC3 | 22B | 28.98 | 84.69 | 2.11 | MultipleMeltPeaks           |
| vanG        | 22B |       |       |      | NoAmplification             |
| vanHB       | 22B |       |       |      | CurveFitFailed              |
| vanHD       | 22B | 32.58 | 83.25 | 1.98 |                             |
| vanRA-01    | 22B |       |       |      | NoAmplification             |
| vanRA-02    | 22B |       |       |      | NoAmplification             |
| vanRB       | 22B | 30.85 | 87.43 | 2.01 |                             |
| vanRC       | 22B |       |       |      | NoAmplification             |
| vanRC4      | 22B |       |       |      | NoAmplification             |
| vanRD       | 22B |       |       |      | NoAmplification             |
| vanSA       | 22B |       |       |      | BadR2, LowEfficiency, CtIs5 |
| vanSB       | 22B | 28.55 | 75.07 | 2.04 |                             |
| vanSC-01    | 22B | 32.23 | 84.01 | 1.98 |                             |
| vanSC-02    | 22B |       |       |      | NoAmplification             |
| vanTC-01    | 22B |       |       |      | NoAmplification             |
| vanTC-02    | 22B | 32.46 | 82.66 | 1.91 |                             |
| vanTE       | 22B | 38.51 | 86.15 | 1.68 | MultipleMeltPeaks           |
| vanTG       | 22B | 33.09 | 74.98 | 2.05 |                             |
| vanWB       | 22B |       |       |      | NoAmplification             |
| vanWG       | 22B |       |       |      | CurveFitFailed              |
| vanXA       | 22B | 36.81 | 76.84 | 1.83 |                             |
| vanXB       | 22B |       |       |      | NoAmplification             |
| vanXD       | 22B | 31.35 | 75.18 | 2.02 |                             |

|              |     |       |       |      |                           |
|--------------|-----|-------|-------|------|---------------------------|
| vanYB        | 22B | 35.32 | 84.95 | 1.88 |                           |
| vanYD-01     | 22B | 30.14 | 84.32 | 1.92 |                           |
| vanYD-02     | 22B | 36.59 | 73.21 | 1.93 |                           |
| vatB-01      | 22B | 38.6  | 74.52 | 1.82 |                           |
| vatB-02      | 22B | 38.34 | 77.5  | 1.86 | MultipleMeltPeaks         |
| vatC-01      | 22B | 31.43 | 75.56 | 1.96 |                           |
| vatC-02      | 22B | 33    | 87.46 | 1.9  |                           |
| vatE-01      | 22B | 30.25 | 76.64 | 2.05 |                           |
| vatE-02      | 22B |       |       |      | NoAmplification           |
| vgaA-01      | 22B | 37.31 | 74.57 | 1.89 |                           |
| vgaA-02      | 22B | 38.93 | 75.67 | 1.82 | MultipleMeltPeaks         |
| vgb-01       | 22B | 35.28 | 80.54 | 1.81 |                           |
| vgbB-01      | 22B | 35.36 | 75.56 | 1.7  | MultipleMeltPeaks         |
| vgbB-02      | 22B | 37.47 | 80.46 | 1.8  |                           |
| yceE/mdtG-0  | 22B |       |       |      | CtIsLarge, CurveFitFailed |
| yceE/mdtG-0  | 22B | 32.01 | 80.77 | 2.09 |                           |
| yceL/mdtH-0  | 22B | 29.27 | 83.58 | 1.87 | MultipleMeltPeaks         |
| yceL/mdtH-0  | 22B |       |       |      | NoAmplification           |
| yceL/mdtH-0  | 22B | 28.81 | 79.46 | 1.95 |                           |
| yidY/mdtL-01 | 22B | 28.89 | 82.71 | 1.97 | MultipleMeltPeaks         |
| yidY/mdtL-02 | 22B |       |       |      | NoAmplification           |































| Assay          | Sample | Ct | Tm    | Efficiency | flag                      |
|----------------|--------|----|-------|------------|---------------------------|
| 16S rRNA       | 22C    |    | 20.11 | 81.99      | 2.02                      |
| aac            | 22C    |    | 30.24 | 81.6       | 1.82 MultipleMeltPeaks    |
| aac(6')-Ib(akε | 22C    |    |       |            | CurveFitFailed            |
| aac(6')-Ib(akε | 22C    |    | 29.96 | 85.93      | 1.95                      |
| aac(6')-Ib(akε | 22C    |    | 31.53 | 76.12      | 1.97 MultipleMeltPeaks    |
| aac(6')-II     | 22C    |    | 32.21 | 86.05      | 1.87 MultipleMeltPeaks    |
| aac(6')I1      | 22C    |    | 39.3  | 88.21      | 1.69 MultipleMeltPeaks    |
| aacA/aphD      | 22C    |    |       |            | NoAmplification           |
| aacC           | 22C    |    | 29.32 | 91.98      | 1.93 MultipleMeltPeaks    |
| aacC1          | 22C    |    | 44.81 | 84.01      | 1.76                      |
| aacC2          | 22C    |    |       |            | NoAmplification           |
| aacC4          | 22C    |    | 31.72 | 83.42      | 2 MultipleMeltPeaks       |
| aadA-01        | 22C    |    |       |            | NoAmplification           |
| aadA-02        | 22C    |    | 34.48 | 80.33      | 1.89                      |
| aadA-1-01      | 22C    |    | 29.29 | 81.19      | 1.9                       |
| aadA-1-02      | 22C    |    | 27.18 | 76.43      | 2.02                      |
| aadA1          | 22C    |    | 30.93 | 84.19      | 2                         |
| aadA2-01       | 22C    |    | 35.51 | 85.57      | 1.76 MultipleMeltPeaks    |
| aadA2-02       | 22C    |    | 32.01 | 75.35      | 2.08                      |
| aadA2-03       | 22C    |    |       |            | NoAmplification           |
| aadA5-01       | 22C    |    | 31.59 | 88.41      | 1.95                      |
| aadA5-02       | 22C    |    | 30    | 83.02      | 1.97 MultipleMeltPeaks    |
| aadA9-01       | 22C    |    | 34.76 | 92.81      | 1.79 MultipleMeltPeaks    |
| aadA9-02       | 22C    |    |       |            | CurveFitFailed            |
| aadD           | 22C    |    |       |            | NoAmplification           |
| aadE           | 22C    |    | 28.16 | 71.82      | 2.07                      |
| acrA-01        | 22C    |    | 29.97 | 88.65      | 1.85                      |
| acrA-02        | 22C    |    | 36.83 | 81.85      | 1.84 MultipleMeltPeaks    |
| acrA-03        | 22C    |    |       |            | CtIsLarge, CurveFitFailed |
| acrA-04        | 22C    |    | 28.86 | 80.54      | 1.96                      |
| acrA-05        | 22C    |    | 29.69 | 88.03      | 1.93                      |
| acrB-01        | 22C    |    | 30.4  | 81.2       | 1.94                      |
| acrF           | 22C    |    | 30.17 | 85.92      | 1.85                      |
| acrR-01        | 22C    |    | 32.82 | 85.76      | 1.91                      |
| acrR-02        | 22C    |    | 33.28 | 86.79      | 1.94 MultipleMeltPeaks    |
| Actin          | 22C    |    | 20.45 | 87.06      | 1.94                      |
| adeA           | 22C    |    | 35.18 | 87.13      | 1.83 MultipleMeltPeaks    |
| ampC-01        | 22C    |    | 31.57 | 85.41      | 1.99 MultipleMeltPeaks    |
| ampC-02        | 22C    |    |       |            | CurveFitFailed            |
| ampC-04        | 22C    |    | 29.98 | 79.08      | 1.76                      |
| ampC-05        | 22C    |    | 29.87 | 81.14      | 1.95                      |
| ampC-06        | 22C    |    | 37.34 | 80.63      | 1.95                      |
| ampC-07        | 22C    |    | 32.24 | 88.38      | 1.88                      |
| ampC-09        | 22C    |    |       |            | NoAmplification           |
| ampC/blaDH     | 22C    |    | 27.37 | 84.06      | 2                         |

|                            |     |       |       |      |                              |
|----------------------------|-----|-------|-------|------|------------------------------|
| aph                        | 22C |       |       |      | NoAmplification              |
| aph(2')-Id-01              | 22C |       |       |      | NoAmplification              |
| aph(2')-Id-02              | 22C |       |       |      | NoAmplification              |
| aph6ia                     | 22C | 39.85 | 78.55 | 1.79 | MultipleMeltPeaks            |
| aphA1(aka k <sub>a</sub> ) | 22C |       |       |      | NoAmplification              |
| bacA-01                    | 22C | 29.65 | 84.11 | 1.93 |                              |
| bacA-02                    | 22C | 32.54 | 88.24 | 1.75 |                              |
| BETA-globin                | 22C | 22.85 | 83.86 | 1.98 | MultipleMeltPeaks            |
| bla-ACC-1                  | 22C | 31.45 | 85.94 | 1.98 |                              |
| bla-L1                     | 22C | 28.71 | 85.2  | 1.99 |                              |
| bla1                       | 22C |       |       |      | NoAmplification              |
| blaCMY                     | 22C |       |       |      | BadR2, LowEfficiency, CtIsS  |
| blaCMY2-01                 | 22C | 34.52 | 83.57 | 1.91 | MultipleMeltPeaks            |
| blaCMY2-02                 | 22C | 27.39 | 84.61 | 2.02 | MultipleMeltPeaks            |
| blaCTX-M-01                | 22C | 39.44 | 76.07 | 1.8  |                              |
| blaCTX-M-02                | 22C | 28.23 | 83.65 | 1.92 |                              |
| blaCTX-M-03                | 22C |       |       |      | LowEfficiency, CtIsSmall, Ci |
| blaCTX-M-04                | 22C | 31.74 | 87.49 | 1.99 |                              |
| blaCTX-M-05                | 22C |       |       |      | CurveFitFailed               |
| blaCTX-M-06                | 22C | 39.59 | 80.04 | 1.82 | MultipleMeltPeaks            |
| blaGES                     | 22C |       |       |      | NoAmplification              |
| blaIMP-01                  | 22C |       |       |      | NoAmplification              |
| blaIMP-02                  | 22C |       |       |      | LowEfficiency, CtIsSmall, Ci |
| blaMOX/blaC                | 22C | 32.79 | 88.27 | 1.93 |                              |
| blaOCH                     | 22C |       |       |      | NoAmplification              |
| blaOKP                     | 22C |       |       |      | NoAmplification              |
| blaOXA1/blaC               | 22C |       |       |      | NoAmplification              |
| blaOXA10-01                | 22C |       |       |      | LowEfficiency, CtIsSmall, Ci |
| blaOXA10-02                | 22C |       |       |      | CurveFitFailed               |
| blaOXY                     | 22C | 32.31 | 85.84 | 1.8  |                              |
| blaPAO                     | 22C |       |       |      | CurveFitFailed               |
| blaPER                     | 22C | 34.48 | 78.38 | 1.69 |                              |
| blaPSE                     | 22C |       |       |      | NoAmplification              |
| blaROB                     | 22C |       |       |      | NoAmplification              |
| blaSFO                     | 22C | 29.03 | 89.91 | 1.92 |                              |
| blaSHV-01                  | 22C | 31.01 | 87.71 | 2.19 | MultipleMeltPeaks            |
| blaSHV-02                  | 22C | 35.53 | 81.75 | 1.85 | MultipleMeltPeaks            |
| blaTEM                     | 22C | 28.81 | 79.05 | 2.02 |                              |
| blaTLA                     | 22C |       |       |      | NoAmplification              |
| blaVEB                     | 22C |       |       |      | NoAmplification              |
| blaVIM                     | 22C |       |       |      | NoAmplification              |
| blaZ                       | 22C |       |       |      | NoAmplification              |
| carB                       | 22C | 32.16 | 84.04 | 1.94 |                              |
| catA1                      | 22C |       |       |      | NoAmplification              |
| catB3                      | 22C | 31.79 | 87.54 | 2    |                              |
| catB8                      | 22C | 26.84 | 84.17 | 1.96 | MultipleMeltPeaks            |

|            |     |       |       |      |                              |
|------------|-----|-------|-------|------|------------------------------|
| ceoA       | 22C | 27.33 | 82.11 | 1.99 |                              |
| cepA       | 22C |       |       |      | NoAmplification              |
| cfiA       | 22C | 28.77 | 87.17 | 1.95 |                              |
| cfr        | 22C |       |       |      | NoAmplification              |
| cfxA       | 22C | 25.93 | 77.33 | 2.09 | MultipleMeltPeaks            |
| cmeA       | 22C | 37.63 | 82.06 | 1.76 |                              |
| cmlA1-01   | 22C | 35.68 | 87.35 | 1.85 |                              |
| cmlA1-02   | 22C |       |       |      | LowEfficiency, CtIsSmall, Ci |
| cmr        | 22C | 34.64 | 72.56 | 1.97 | MultipleMeltPeaks            |
| cmx(A)     | 22C | 25.28 | 84.41 | 2    | MultipleMeltPeaks            |
| cphA-01    | 22C | 29.19 | 85.27 | 1.97 | MultipleMeltPeaks            |
| cphA-02    | 22C | 31.42 | 82.36 | 1.91 |                              |
| dfrA1      | 22C | 36.95 | 78.76 | 1.79 |                              |
| dfrA12     | 22C | 32.48 | 87.01 | 1.87 |                              |
| emrD       | 22C | 35.45 | 89.86 | 1.79 |                              |
| ereA       | 22C | 38.56 | 83.27 | 1.72 | MultipleMeltPeaks            |
| ereB       | 22C | 31.41 | 77.96 | 2.08 | MultipleMeltPeaks            |
| erm(34)    | 22C | 42.63 | 87.31 | 1.6  | MultipleMeltPeaks            |
| erm(35)    | 22C |       |       |      | NoAmplification              |
| erm(36)    | 22C | 32.81 | 87.36 | 2.04 |                              |
| ermA       | 22C |       |       |      | NoAmplification              |
| ermA/ermTR | 22C |       |       |      | NoAmplification              |
| ermB       | 22C | 25.46 | 74.75 | 2.13 |                              |
| ermC       | 22C |       |       |      | LowEfficiency, CtIsSmall, Ci |
| ermF       | 22C |       |       |      | LowEfficiency, CtIsSmall, S: |
| ermJ/ermD  | 22C |       |       |      | CtIsLarge, CurveFitFailed    |
| ermK-01    | 22C | 38.89 | 73.43 | 1.73 | MultipleMeltPeaks            |
| ermK-02    | 22C | 34.59 | 79.7  | 1.8  | MultipleMeltPeaks            |
| ermT-01    | 22C |       |       |      | CurveFitFailed               |
| ermT-02    | 22C | 34.03 | 79.54 | 1.96 |                              |
| ermX       | 22C | 33.05 | 87.6  | 1.82 |                              |
| ermY       | 22C |       |       |      | NoAmplification              |
| fabK       | 22C | 26.26 | 79.23 | 2.08 |                              |
| floR       | 22C |       |       |      | NoAmplification              |
| folA       | 22C | 31.92 | 80.13 | 1.97 |                              |
| fosB       | 22C |       |       |      | LowEfficiency, CtIsSmall, Ci |
| fosX       | 22C |       |       |      | NoAmplification              |
| fox5       | 22C | 25.09 | 87.22 | 1.95 | MultipleMeltPeaks            |
| imiR       | 22C |       |       |      | LowEfficiency, CtIsSmall, S: |
| ImrA-01    | 22C | 38.1  | 80.8  | 1.84 |                              |
| intl       | 22C | 28.49 | 84.57 | 1.98 | MultipleMeltPeaks            |
| intl1      | 22C | 19.11 | 87.35 | 2.1  |                              |
| IS613      | 22C | 27.79 | 79.33 | 1.95 |                              |
| lnuA-01    | 22C |       |       |      | NoAmplification              |
| lnuB-01    | 22C |       |       |      | NoAmplification              |
| lnuB-02    | 22C |       |       |      | LowEfficiency, CtIsSmall, Ci |

|                |     |       |       |      |                              |
|----------------|-----|-------|-------|------|------------------------------|
| lnuC           | 22C | 33.54 | 87.55 | 1.81 |                              |
| marR-01        | 22C | 30.48 | 85.26 | 1.92 |                              |
| matA/mel       | 22C | 22.5  | 77.47 | 2.03 |                              |
| mdet1          | 22C |       |       |      | NoAmplification              |
| mdtA           | 22C | 37.84 | 81.92 | 1.72 |                              |
| mdtE/yhiU      | 22C | 39.37 | 85.41 | 1.68 | MultipleMeltPeaks            |
| mecA           | 22C |       |       |      | NoAmplification              |
| mefA           | 22C | 22.07 | 80.38 | 1.97 | MultipleMeltPeaks            |
| mepA           | 22C | 31.61 | 84.47 | 2    |                              |
| mexA           | 22C | 37.94 | 76.9  | 1.83 |                              |
| mexD           | 22C | 32.69 | 80.04 | 2.02 |                              |
| mexE           | 22C | 34.37 | 78.91 | 1.85 | MultipleMeltPeaks            |
| mexF           | 22C | 26.86 | 82.41 | 2.12 | MultipleMeltPeaks            |
| mphA-01        | 22C | 27.55 | 88.64 | 2    |                              |
| mphA-02        | 22C | 27.49 | 86.74 | 2.09 |                              |
| mphB           | 22C | 38.22 | 82.78 | 1.7  |                              |
| mphC           | 22C | 35.93 | 79.73 | 1.76 | MultipleMeltPeaks            |
| msrA-01        | 22C |       |       |      | LowEfficiency, CtIsSmall, Ci |
| msrC-01        | 22C |       |       |      | NoAmplification              |
| mtrC-01        | 22C |       |       |      | NoAmplification              |
| mtrC-02        | 22C | 29.84 | 85.26 | 1.99 |                              |
| mtrD-02        | 22C | 26    | 81.11 | 1.92 | MultipleMeltPeaks            |
| mtrD-03        | 22C | 29.47 | 80.34 | 1.82 | MultipleMeltPeaks            |
| NDM1           | 22C |       |       |      | CurveFitFailed               |
| nimE           | 22C | 36.5  | 84.87 | 2.05 |                              |
| nisB           | 22C |       |       |      | NoAmplification              |
| oleC           | 22C |       |       |      | CtIsLarge, CurveFitFailed    |
| oprD           | 22C | 27.36 | 86.67 | 2.04 |                              |
| oprJ           | 22C | 33.72 | 87.5  | 1.99 | MultipleMeltPeaks            |
| pbp            | 22C | 36.9  | 85.09 | 1.89 |                              |
| pbp2x          | 22C | 28.57 | 75.08 | 2.07 |                              |
| Pbp5           | 22C |       |       |      | NoAmplification              |
| penA           | 22C | 35.63 | 85.63 | 1.77 |                              |
| pikR1          | 22C |       |       |      | CurveFitFailed               |
| pikR2          | 22C | 30.31 | 84.66 | 2.07 |                              |
| pmrA           | 22C | 25.37 | 78.78 | 2.14 |                              |
| pncA           | 22C | 28.94 | 84.49 | 1.87 | MultipleMeltPeaks            |
| putative multi | 22C | 31.64 | 84.01 | 1.97 |                              |
| qac            | 22C | 38.01 | 78.8  | 1.84 |                              |
| qacA           | 22C |       |       |      | NoAmplification              |
| qacA/qacB      | 22C | 39.54 | 84.61 | 1.42 | MultipleMeltPeaks            |
| qacEdelta1-0   | 22C |       |       |      | NoAmplification              |
| qacEdelta1-0   | 22C | 32.45 | 87.45 | 1.96 |                              |
| qacH-01        | 22C | 30.28 | 86.13 | 1.99 |                              |
| qacH-02        | 22C | 33.62 | 83.94 | 1.65 |                              |
| qnrA           | 22C | 36.7  | 77.12 | 1.81 | MultipleMeltPeaks            |



|              |     |       |       |      |                              |
|--------------|-----|-------|-------|------|------------------------------|
| rarD-02      | 22C | 31.25 | 85.71 | 1.95 |                              |
| sat4         | 22C |       |       |      | NoAmplification              |
| sdeB         | 22C |       |       |      | NoAmplification              |
| spcN-01      | 22C |       |       |      | NoAmplification              |
| speA         | 22C |       |       |      | NoAmplification              |
| str          | 22C |       |       |      | NoAmplification              |
| strA         | 22C |       |       |      | LowEfficiency, CtIsSmall, Ct |
| strB         | 22C | 30.33 | 83.71 | 1.93 |                              |
| sul1         | 22C | 31.98 | 89.63 | 1.86 |                              |
| sul2         | 22C |       |       |      | LowEfficiency, CtIsSmall, Ct |
| sulA/foIP-01 | 22C | 26    | 81.21 | 2    |                              |
| sulA/foIP-03 | 22C | 23.92 | 83.6  | 2.01 |                              |
| tet(32)      | 22C |       |       |      | NoAmplification              |
| tet(34)      | 22C | 31.26 | 75.59 | 1.97 |                              |
| tet(35)      | 22C | 39.25 | 75.23 | 1.81 | MultipleMeltPeaks            |
| tet(36)-A    | 22C |       |       |      | NoAmplification              |
| tet(36)-B    | 22C |       |       |      | NoAmplification              |
| tet(37)      | 22C | 28.49 | 79.67 | 1.94 | MultipleMeltPeaks            |
| tetA-01      | 22C | 29.28 | 85.03 | 1.91 |                              |
| tetA-02      | 22C | 41.69 | 71.85 | 1.69 | MultipleMeltPeaks            |
| tetB-01      | 22C | 30.44 | 86.27 | 1.96 |                              |
| tetB-02      | 22C | 40.74 | 77.46 | 1.7  |                              |
| tetC-01      | 22C |       |       |      | NoAmplification              |
| tetC-02      | 22C | 35.18 | 82.39 | 1.95 |                              |
| tetD-01      | 22C |       |       |      | LowEfficiency, CtIsSmall, Ct |
| tetD-02      | 22C |       |       |      | CtIsLarge, CurveFitFailed    |
| tetE         | 22C |       |       |      | NoAmplification              |
| tetG-01      | 22C | 34.31 | 89.85 | 1.86 | MultipleMeltPeaks            |
| tetG-02      | 22C | 30.8  | 87.31 | 1.94 |                              |
| tetH         | 22C |       |       |      | NoAmplification              |
| tetJ         | 22C |       |       |      | NoAmplification              |
| tetK         | 22C |       |       |      | NoAmplification              |
| tetL-01      | 22C | 41.87 | 81.16 | 1.66 |                              |
| tetL-02      | 22C | 31.25 | 85.15 | 1.81 |                              |
| tetM-01      | 22C | 24.76 | 75.91 | 2.01 |                              |
| tetM-02      | 22C | 25.9  | 77.59 | 1.99 |                              |
| tetO-01      | 22C |       |       |      | LowEfficiency, CtIsSmall, Ct |
| tetPA        | 22C |       |       |      | NoAmplification              |
| tetPB-01     | 22C |       |       |      | CtIsLarge, CurveFitFailed    |
| tetPB-02     | 22C | 27.72 | 84.73 | 2.04 |                              |
| tetPB-03     | 22C |       |       |      | NoAmplification              |
| tetPB-05     | 22C | 36.48 | 82.22 | 1.87 |                              |
| tetQ         | 22C | 26.35 | 76.72 | 2.08 |                              |
| tetR-02      | 22C | 29.98 | 89.12 | 1.88 |                              |
| tetR-03      | 22C |       |       |      | NoAmplification              |
| tetS         | 22C | 37.6  | 80.61 | 1.96 | MultipleMeltPeaks            |

|             |     |       |       |      |                              |
|-------------|-----|-------|-------|------|------------------------------|
| tetT        | 22C |       |       |      | NoAmplification              |
| tetU-01     | 22C |       |       |      | NoAmplification              |
| tetV        | 22C |       |       |      | NoAmplification              |
| tetW-01     | 22C | 27.78 | 81.73 | 2    |                              |
| tetX        | 22C |       |       |      | BadR2, CtIsSmall, Saturatio  |
| tnpA-01     | 22C | 37.06 | 79.25 | 2.03 | MultipleMeltPeaks            |
| tnpA-02     | 22C | 32.27 | 89.04 | 1.79 |                              |
| tnpA-03     | 22C |       |       |      | NoAmplification              |
| tnpA-04     | 22C | 37.64 | 78.39 | 1.83 |                              |
| tnpA-05     | 22C | 29.14 | 80.85 | 1.94 |                              |
| tnpA-07     | 22C |       |       |      | NoAmplification              |
| tolC-01     | 22C | 32.32 | 80.37 | 1.86 |                              |
| tolC-02     | 22C | 30.36 | 87.22 | 1.92 | MultipleMeltPeaks            |
| tolC-03     | 22C | 28.99 | 85.72 | 1.92 |                              |
| Tp614       | 22C | 34.19 | 82.91 | 1.84 | MultipleMeltPeaks            |
| ttgA        | 22C | 29.37 | 88.12 | 1.84 |                              |
| ttgB        | 22C | 28.34 | 83.22 | 1.92 |                              |
| vanA        | 22C |       |       |      | NoAmplification              |
| vanB-01     | 22C | 30.39 | 84.19 | 1.98 |                              |
| vanC-01     | 22C |       |       |      | LowEfficiency, CtIsSmall, Ci |
| vanC-02     | 22C |       |       |      | NoAmplification              |
| vanC-03     | 22C | 25.89 | 85.18 | 1.95 |                              |
| vanC1       | 22C |       |       |      | NoAmplification              |
| vanC2/vanC3 | 22C | 32    | 82.8  | 2.16 | MultipleMeltPeaks            |
| vanG        | 22C |       |       |      | NoAmplification              |
| vanHB       | 22C | 35.19 | 87.46 | 1.85 | MultipleMeltPeaks            |
| vanHD       | 22C | 29.97 | 82.61 | 1.93 |                              |
| vanRA-01    | 22C |       |       |      | NoAmplification              |
| vanRA-02    | 22C |       |       |      | NoAmplification              |
| vanRB       | 22C | 30.76 | 87.65 | 2.04 |                              |
| vanRC       | 22C |       |       |      | NoAmplification              |
| vanRC4      | 22C |       |       |      | NoAmplification              |
| vanRD       | 22C |       |       |      | NoAmplification              |
| vanSA       | 22C |       |       |      | CurveFitFailed               |
| vanSB       | 22C | 31.17 | 75.17 | 2.1  |                              |
| vanSC-01    | 22C | 35.03 | 84    | 1.85 |                              |
| vanSC-02    | 22C |       |       |      | NoAmplification              |
| vanTC-01    | 22C |       |       |      | CurveFitFailed               |
| vanTC-02    | 22C | 30.27 | 79.31 | 1.96 |                              |
| vanTE       | 22C | 36.52 | 77.73 | 1.71 | MultipleMeltPeaks            |
| vanTG       | 22C | 40.88 | 73.97 | 1.95 |                              |
| vanWB       | 22C |       |       |      | NoAmplification              |
| vanWG       | 22C |       |       |      | CurveFitFailed               |
| vanXA       | 22C | 32.94 | 79.83 | 1.94 |                              |
| vanXB       | 22C |       |       |      | NoAmplification              |
| vanXD       | 22C | 29.61 | 75.39 | 2.05 |                              |

|              |     |       |       |      |                              |
|--------------|-----|-------|-------|------|------------------------------|
| vanYB        | 22C | 36.28 | 77.31 | 1.88 |                              |
| vanYD-01     | 22C | 31.16 | 82.39 | 1.8  |                              |
| vanYD-02     | 22C |       |       |      | NoAmplification              |
| vatB-01      | 22C | 33.99 | 74.97 | 1.96 |                              |
| vatB-02      | 22C | 37.24 | 83.01 | 1.76 | MultipleMeltPeaks            |
| vatC-01      | 22C |       |       |      | NoAmplification              |
| vatC-02      | 22C | 36.31 | 83.09 | 1.85 | MultipleMeltPeaks            |
| vatE-01      | 22C | 30.47 | 77.06 | 2.03 |                              |
| vatE-02      | 22C | 37.95 | 79.19 | 1.93 |                              |
| vgaA-01      | 22C |       |       |      | NoAmplification              |
| vgaA-02      | 22C |       |       |      | CurveFitFailed               |
| vgb-01       | 22C | 36.64 | 74.61 | 1.83 | MultipleMeltPeaks            |
| vgbB-01      | 22C | 36.65 | 75.86 | 1.69 | MultipleMeltPeaks            |
| vgbB-02      | 22C |       |       |      | NoAmplification              |
| yceE/mdtG-0  | 22C | 33.47 | 81.1  | 2.1  |                              |
| yceE/mdtG-0  | 22C |       |       |      | CtIsLarge, CurveFitFailed    |
| yceL/mdtH-0  | 22C | 28.97 | 84.47 | 1.89 | MultipleMeltPeaks            |
| yceL/mdtH-0  | 22C |       |       |      | NoAmplification              |
| yceL/mdtH-0  | 22C | 34.29 | 87.04 | 1.84 |                              |
| yidY/mdtL-01 | 22C | 30.19 | 88.45 | 1.96 |                              |
| yidY/mdtL-02 | 22C |       |       |      | LowEfficiency, CtIsSmall, Ci |































| Assay          | Sample | Ct | Tm    | Efficiency | flag                         |
|----------------|--------|----|-------|------------|------------------------------|
| 16S rRNA       | 23A    |    | 14.65 | 81.15      | 2.06                         |
| aac            | 23A    |    | 28.97 | 86.28      | 1.67 MultipleMeltPeaks       |
| aac(6')-Ib(akz | 23A    |    |       |            | CurveFitFailed               |
| aac(6')-Ib(akz | 23A    |    | 28.6  | 86.31      | 1.98                         |
| aac(6')-Ib(akz | 23A    |    | 31.97 | 80.81      | 1.97 MultipleMeltPeaks       |
| aac(6')-II     | 23A    |    | 31.85 | 83.61      | 1.89                         |
| aac(6')I1      | 23A    |    | 38.14 | 88.64      | 1.79                         |
| aacA/aphD      | 23A    |    |       |            | LowEfficiency, CtIsSmall, Ci |
| aacC           | 23A    |    | 30.5  | 91.87      | 1.79 MultipleMeltPeaks       |
| aacC1          | 23A    |    |       |            | NoAmplification              |
| aacC2          | 23A    |    |       |            | NoAmplification              |
| aacC4          | 23A    |    | 33.32 | 90.56      | 2.01 MultipleMeltPeaks       |
| aadA-01        | 23A    |    |       |            | NoAmplification              |
| aadA-02        | 23A    |    | 35.85 | 80         | 1.87                         |
| aadA-1-01      | 23A    |    | 32.17 | 81.22      | 1.89 MultipleMeltPeaks       |
| aadA-1-02      | 23A    |    |       |            | NoAmplification              |
| aadA1          | 23A    |    | 30.39 | 84.48      | 2.17                         |
| aadA2-01       | 23A    |    | 37.45 | 85.36      | 1.73                         |
| aadA2-02       | 23A    |    | 32.07 | 75.3       | 2.11                         |
| aadA2-03       | 23A    |    |       |            | NoAmplification              |
| aadA5-01       | 23A    |    | 34.14 | 88.49      | 1.86                         |
| aadA5-02       | 23A    |    | 30.59 | 77.6       | 1.97 MultipleMeltPeaks       |
| aadA9-01       | 23A    |    | 34.87 | 88.85      | 1.91 MultipleMeltPeaks       |
| aadA9-02       | 23A    |    | 35.06 | 72.76      | 1.87 MultipleMeltPeaks       |
| aadD           | 23A    |    |       |            | NoAmplification              |
| aadE           | 23A    |    | 35.61 | 70.65      | 2.01                         |
| acrA-01        | 23A    |    | 29.21 | 88.81      | 1.94                         |
| acrA-02        | 23A    |    | 36.72 | 85.83      | 1.8                          |
| acrA-03        | 23A    |    |       |            | CurveFitFailed               |
| acrA-04        | 23A    |    | 29.26 | 80.04      | 1.96 MultipleMeltPeaks       |
| acrA-05        | 23A    |    | 31.93 | 88.47      | 1.92                         |
| acrB-01        | 23A    |    |       |            | NoAmplification              |
| acrF           | 23A    |    | 25.26 | 83.96      | 1.81 MultipleMeltPeaks       |
| acrR-01        | 23A    |    | 30.83 | 84.83      | 1.92 MultipleMeltPeaks       |
| acrR-02        | 23A    |    | 34.97 | 82.44      | 1.88 MultipleMeltPeaks       |
| Actin          | 23A    |    | 19.37 | 86.84      | 2.04                         |
| adeA           | 23A    |    |       |            | LowEfficiency, CtIsSmall, Ci |
| ampC-01        | 23A    |    | 30.76 | 85.18      | 2                            |
| ampC-02        | 23A    |    | 34.73 | 82.7       | 1.92                         |
| ampC-04        | 23A    |    | 29.47 | 80.85      | 1.82                         |
| ampC-05        | 23A    |    |       |            | NoAmplification              |
| ampC-06        | 23A    |    | 37.27 | 84.08      | 1.91                         |
| ampC-07        | 23A    |    | 32.32 | 88.31      | 1.89                         |
| ampC-09        | 23A    |    | 34.52 | 74.9       | 1.9                          |
| ampC/blaDH     | 23A    |    | 27.21 | 84.58      | 1.98 MultipleMeltPeaks       |

|                            |     |       |       |                              |
|----------------------------|-----|-------|-------|------------------------------|
| aph                        | 23A |       |       | NoAmplification              |
| aph(2')-Id-01              | 23A |       |       | NoAmplification              |
| aph(2')-Id-02              | 23A |       |       | NoAmplification              |
| aph6ia                     | 23A | 30.4  | 78.07 | 1.94                         |
| aphA1(aka k <sub>z</sub> ) | 23A |       |       | NoAmplification              |
| bacA-01                    | 23A | 34.67 | 85.18 | 1.9                          |
| bacA-02                    | 23A | 32.37 | 85.66 | 1.9 MultipleMeltPeaks        |
| BETA-globin                | 23A | 21.09 | 83.96 | 1.99                         |
| bla-ACC-1                  | 23A | 34.89 | 88.65 | 1.83                         |
| bla-L1                     | 23A | 30.07 | 88.27 | 1.9 MultipleMeltPeaks        |
| bla1                       | 23A |       |       | NoAmplification              |
| blaCMY                     | 23A | 36.47 | 76.24 | 1.88                         |
| blaCMY2-01                 | 23A | 31.78 | 74.77 | 1.94 MultipleMeltPeaks       |
| blaCMY2-02                 | 23A | 26.4  | 88.42 | 2.04 MultipleMeltPeaks       |
| blaCTX-M-01                | 23A |       |       | NoAmplification              |
| blaCTX-M-02                | 23A | 27.38 | 84.36 | 1.91                         |
| blaCTX-M-03                | 23A |       |       | LowEfficiency, CtIsSmall, Ci |
| blaCTX-M-04                | 23A | 30.1  | 87.51 | 1.92 MultipleMeltPeaks       |
| blaCTX-M-05                | 23A | 30.95 | 75.62 | 1.81                         |
| blaCTX-M-06                | 23A |       |       | NoAmplification              |
| blaGES                     | 23A | 34.82 | 83.51 | 1.87                         |
| blaIMP-01                  | 23A |       |       | NoAmplification              |
| blaIMP-02                  | 23A | 35.89 | 81.09 | 1.89                         |
| blaMOX/blaC                | 23A | 36.18 | 82.03 | 1.93                         |
| blaOCH                     | 23A |       |       | NoAmplification              |
| blaOKP                     | 23A |       |       | NoAmplification              |
| blaOXA1/blaC               | 23A |       |       | NoAmplification              |
| blaOXA10-01                | 23A |       |       | BadR2, LowEfficiency, CtIsS  |
| blaOXA10-02                | 23A |       |       | LowEfficiency, CtIsSmall, Ci |
| blaOXY                     | 23A | 31.87 | 89.09 | 1.8                          |
| blaPAO                     | 23A |       |       | NoAmplification              |
| blaPER                     | 23A |       |       | CurveFitFailed               |
| blaPSE                     | 23A |       |       | NoAmplification              |
| blaROB                     | 23A |       |       | NoAmplification              |
| blaSFO                     | 23A | 29.81 | 89.61 | 1.94 MultipleMeltPeaks       |
| blaSHV-01                  | 23A | 30.47 | 83.15 | 1.8 MultipleMeltPeaks        |
| blaSHV-02                  | 23A |       |       | NoAmplification              |
| blaTEM                     | 23A | 33.93 | 82.1  | 1.96 MultipleMeltPeaks       |
| blaTLA                     | 23A |       |       | NoAmplification              |
| blaVEB                     | 23A |       |       | NoAmplification              |
| blaVIM                     | 23A |       |       | NoAmplification              |
| blaZ                       | 23A |       |       | NoAmplification              |
| carB                       | 23A | 38.47 | 81.73 | 1.74                         |
| catA1                      | 23A |       |       | NoAmplification              |
| catB3                      | 23A | 32.24 | 87.49 | 2.15                         |
| catB8                      | 23A | 27.42 | 84.55 | 2 MultipleMeltPeaks          |

|            |     |       |       |      |                              |
|------------|-----|-------|-------|------|------------------------------|
| ceoA       | 23A | 27.96 | 82.26 | 1.99 | MultipleMeltPeaks            |
| cepA       | 23A |       |       |      | NoAmplification              |
| cfiA       | 23A | 28.69 | 86.83 | 1.98 |                              |
| cfr        | 23A |       |       |      | NoAmplification              |
| cfxA       | 23A | 25.72 | 77.5  | 2.1  |                              |
| cmeA       | 23A | 35.89 | 81.35 | 1.84 | MultipleMeltPeaks            |
| cmlA1-01   | 23A |       |       |      | NoAmplification              |
| cmlA1-02   | 23A | 34.16 | 80.59 | 1.94 |                              |
| cmr        | 23A |       |       |      | NoAmplification              |
| cmx(A)     | 23A | 26.71 | 87.78 | 2.05 | MultipleMeltPeaks            |
| cphA-01    | 23A | 28.77 | 90.72 | 1.97 | MultipleMeltPeaks            |
| cphA-02    | 23A | 32.33 | 82.36 | 1.95 |                              |
| dfrA1      | 23A | 33.96 | 82.74 | 2.01 |                              |
| dfrA12     | 23A | 37.1  | 84.3  | 1.72 | MultipleMeltPeaks            |
| emrD       | 23A | 33.98 | 75.2  | 1.94 | MultipleMeltPeaks            |
| ereA       | 23A | 31.98 | 82.84 | 1.97 |                              |
| ereB       | 23A | 31.91 | 85.55 | 2.15 |                              |
| erm(34)    | 23A |       |       |      | NoAmplification              |
| erm(35)    | 23A |       |       |      | NoAmplification              |
| erm(36)    | 23A | 34.14 | 85.83 | 2.09 | MultipleMeltPeaks            |
| ermA       | 23A |       |       |      | NoAmplification              |
| ermA/ermTR | 23A |       |       |      | NoAmplification              |
| ermB       | 23A | 27.48 | 74.49 | 2.07 |                              |
| ermC       | 23A |       |       |      | NoAmplification              |
| ermF       | 23A |       |       |      | NoAmplification              |
| ermJ/ermD  | 23A |       |       |      | NoAmplification              |
| ermK-01    | 23A | 37.22 | 81.65 | 1.93 | MultipleMeltPeaks            |
| ermK-02    | 23A | 34.01 | 86.48 | 1.79 |                              |
| ermT-01    | 23A |       |       |      | NoAmplification              |
| ermT-02    | 23A | 37.86 | 79.86 | 2.06 |                              |
| ermX       | 23A | 31.8  | 87.78 | 1.87 | MultipleMeltPeaks            |
| ermY       | 23A |       |       |      | NoAmplification              |
| fabK       | 23A | 26.27 | 79.18 | 2.13 |                              |
| floR       | 23A |       |       |      | NoAmplification              |
| folA       | 23A | 43.18 | 81.75 | 1.62 |                              |
| fosB       | 23A |       |       |      | LowEfficiency, CtIsSmall, Ci |
| fosX       | 23A |       |       |      | NoAmplification              |
| fox5       | 23A | 24.77 | 87.32 | 1.98 |                              |
| imiR       | 23A |       |       |      | NoAmplification              |
| ImrA-01    | 23A | 34.97 | 82.4  | 1.94 |                              |
| intl       | 23A | 29.59 | 85.03 | 1.86 | MultipleMeltPeaks            |
| intl1      | 23A | 19    | 87.29 | 2.09 |                              |
| IS613      | 23A | 26.75 | 79.3  | 1.94 |                              |
| lnuA-01    | 23A |       |       |      | NoAmplification              |
| lnuB-01    | 23A |       |       |      | NoAmplification              |
| lnuB-02    | 23A |       |       |      | NoAmplification              |

|                |     |       |       |      |                              |
|----------------|-----|-------|-------|------|------------------------------|
| lnuC           | 23A | 33.18 | 86.9  | 1.95 |                              |
| marR-01        | 23A | 31.96 | 85.06 | 1.93 |                              |
| matA/mel       | 23A | 25.86 | 77.08 | 2.04 | MultipleMeltPeaks            |
| mdet1          | 23A |       |       |      | LowEfficiency, CtIsSmall, C  |
| mdtA           | 23A | 33.45 | 81.94 | 2.06 |                              |
| mdtE/yhiU      | 23A | 37.96 | 86.03 | 1.86 |                              |
| mecA           | 23A |       |       |      | NoAmplification              |
| mefA           | 23A | 24.03 | 80.27 | 2    |                              |
| mepA           | 23A | 32.12 | 86.86 | 1.98 |                              |
| mexA           | 23A |       |       |      | CurveFitFailed               |
| mexD           | 23A | 30.44 | 80.35 | 2.02 |                              |
| mexE           | 23A | 35.94 | 85.1  | 1.85 |                              |
| mexF           | 23A | 26.38 | 87.69 | 2.21 |                              |
| mphA-01        | 23A | 29.53 | 87.19 | 2    |                              |
| mphA-02        | 23A | 27.31 | 86.71 | 2.21 |                              |
| mphB           | 23A | 37.26 | 80.93 | 1.74 |                              |
| mphC           | 23A | 41.59 | 79.12 | 1.53 | MultipleMeltPeaks            |
| msrA-01        | 23A |       |       |      | NoAmplification              |
| msrC-01        | 23A |       |       |      | NoAmplification              |
| mtrC-01        | 23A |       |       |      | NoAmplification              |
| mtrC-02        | 23A | 31.45 | 83.88 | 2.08 |                              |
| mtrD-02        | 23A | 28.19 | 82.44 | 1.87 |                              |
| mtrD-03        | 23A |       |       |      | CurveFitFailed               |
| NDM1           | 23A |       |       |      | CurveFitFailed               |
| nimE           | 23A | 34.48 | 75.52 | 1.93 | MultipleMeltPeaks            |
| nisB           | 23A |       |       |      | CtIsSmall, CurveFitFailed, F |
| oleC           | 23A |       |       |      | LowEfficiency, CtIsSmall, S  |
| oprD           | 23A | 27.33 | 86.29 | 2.11 | MultipleMeltPeaks            |
| oprJ           | 23A |       |       |      | NoAmplification              |
| pbp            | 23A |       |       |      | NoAmplification              |
| pbp2x          | 23A |       |       |      | NoAmplification              |
| Pbp5           | 23A |       |       |      | NoAmplification              |
| penA           | 23A | 33.88 | 86.83 | 1.8  |                              |
| pikR1          | 23A |       |       |      | NoAmplification              |
| pikR2          | 23A | 28.98 | 84.87 | 2.08 |                              |
| pmrA           | 23A | 25.23 | 78.96 | 2.12 |                              |
| pncA           | 23A | 32.1  | 89.12 | 1.95 |                              |
| putative multi | 23A | 29.1  | 84.2  | 1.95 |                              |
| qac            | 23A | 37.74 | 78.82 | 1.99 | MultipleMeltPeaks            |
| qacA           | 23A |       |       |      | NoAmplification              |
| qacA/qacB      | 23A | 36.48 | 84.76 | 1.45 | MultipleMeltPeaks            |
| qacEdelta1-0   | 23A |       |       |      | NoAmplification              |
| qacEdelta1-0   | 23A | 34.02 | 78.26 | 1.97 |                              |
| qacH-01        | 23A | 32.33 | 85.72 | 1.94 | MultipleMeltPeaks            |
| qacH-02        | 23A | 34.39 | 83.77 | 1.63 |                              |
| qnrA           | 23A | 29.83 | 78.95 | 2.01 |                              |

|              |     |       |       |      |                              |
|--------------|-----|-------|-------|------|------------------------------|
| rarD-02      | 23A | 33.02 | 85.81 | 2.02 |                              |
| sat4         | 23A |       |       |      | LowEfficiency, CtIsSmall, Ci |
| sdeB         | 23A |       |       |      | NoAmplification              |
| spcN-01      | 23A |       |       |      | CurveFitFailed               |
| speA         | 23A |       |       |      | NoAmplification              |
| str          | 23A |       |       |      | NoAmplification              |
| strA         | 23A |       |       |      | NoAmplification              |
| strB         | 23A | 31.47 | 78.93 | 1.97 | MultipleMeltPeaks            |
| sul1         | 23A | 31.29 | 89.65 | 1.92 |                              |
| sul2         | 23A |       |       |      | LowEfficiency, CtIsSmall, Ci |
| sulA/foIP-01 | 23A | 25.15 | 81.22 | 1.98 |                              |
| sulA/foIP-03 | 23A | 23.76 | 82.82 | 2.08 |                              |
| tet(32)      | 23A |       |       |      | NoAmplification              |
| tet(34)      | 23A | 36.12 | 74.32 | 1.96 |                              |
| tet(35)      | 23A | 36.43 | 83.83 | 1.87 |                              |
| tet(36)-A    | 23A |       |       |      | NoAmplification              |
| tet(36)-B    | 23A |       |       |      | NoAmplification              |
| tet(37)      | 23A | 26.76 | 75.24 | 1.96 | MultipleMeltPeaks            |
| tetA-01      | 23A | 30.88 | 84.9  | 1.97 |                              |
| tetA-02      | 23A | 37.55 | 89.26 | 1.85 | MultipleMeltPeaks            |
| tetB-01      | 23A | 30.15 | 87.51 | 1.94 |                              |
| tetB-02      | 23A |       |       |      | LowEfficiency, CtIsSmall, Ci |
| tetC-01      | 23A |       |       |      | NoAmplification              |
| tetC-02      | 23A | 39.08 | 85.33 | 1.84 | MultipleMeltPeaks            |
| tetD-01      | 23A |       |       |      | LowEfficiency, CtIsSmall, Ci |
| tetD-02      | 23A | 41.96 | 75.89 | 1.73 |                              |
| tetE         | 23A |       |       |      | NoAmplification              |
| tetG-01      | 23A | 31.95 | 82.21 | 2.06 | MultipleMeltPeaks            |
| tetG-02      | 23A | 32.81 | 87.91 | 1.9  |                              |
| tetH         | 23A |       |       |      | NoAmplification              |
| tetJ         | 23A | 36.88 | 80.26 | 1.89 |                              |
| tetK         | 23A |       |       |      | NoAmplification              |
| tetL-01      | 23A |       |       |      | NoAmplification              |
| tetL-02      | 23A | 32.46 | 85.1  | 1.78 |                              |
| tetM-01      | 23A | 24.03 | 75.61 | 2.02 |                              |
| tetM-02      | 23A | 24.22 | 77.44 | 2.04 |                              |
| tetO-01      | 23A |       |       |      | NoAmplification              |
| tetPA        | 23A |       |       |      | NoAmplification              |
| tetPB-01     | 23A | 35.47 | 85.1  | 1.86 |                              |
| tetPB-02     | 23A | 28.43 | 84.78 | 1.97 |                              |
| tetPB-03     | 23A |       |       |      | NoAmplification              |
| tetPB-05     | 23A |       |       |      | CurveFitFailed               |
| tetQ         | 23A | 26.67 | 75.73 | 2.07 |                              |
| tetR-02      | 23A | 31.36 | 90.53 | 1.97 |                              |
| tetR-03      | 23A |       |       |      | NoAmplification              |
| tetS         | 23A | 33.36 | 85.27 | 2.27 |                              |

|             |     |       |       |      |                              |
|-------------|-----|-------|-------|------|------------------------------|
| tetT        | 23A |       |       |      | NoAmplification              |
| tetU-01     | 23A |       |       |      | NoAmplification              |
| tetV        | 23A |       |       |      | NoAmplification              |
| tetW-01     | 23A | 27.49 | 81.52 | 2.01 |                              |
| tetX        | 23A |       |       |      | NoAmplification              |
| tnpA-01     | 23A |       |       |      | NoAmplification              |
| tnpA-02     | 23A | 33    | 84.22 | 1.81 | MultipleMeltPeaks            |
| tnpA-03     | 23A | 30.59 | 75.56 | 2.16 |                              |
| tnpA-04     | 23A |       |       |      | LowEfficiency, CtIsSmall, Ci |
| tnpA-05     | 23A | 29.22 | 80.74 | 1.93 |                              |
| tnpA-07     | 23A |       |       |      | NoAmplification              |
| tolC-01     | 23A | 32.35 | 81.16 | 1.94 |                              |
| tolC-02     | 23A | 31.06 | 87.86 | 1.96 |                              |
| tolC-03     | 23A | 30.83 | 87.6  | 1.94 |                              |
| Tp614       | 23A | 31.48 | 82.99 | 1.98 | MultipleMeltPeaks            |
| ttgA        | 23A | 31.99 | 87.46 | 1.86 |                              |
| ttgB        | 23A | 34.65 | 87.88 | 1.97 |                              |
| vanA        | 23A |       |       |      | NoAmplification              |
| vanB-01     | 23A | 30.49 | 84.66 | 2.11 |                              |
| vanC-01     | 23A | 34.88 | 73.37 | 2.12 |                              |
| vanC-02     | 23A |       |       |      | LowEfficiency, CtIsSmall, Ci |
| vanC-03     | 23A | 25.13 | 85.83 | 1.97 |                              |
| vanC1       | 23A |       |       |      | NoAmplification              |
| vanC2/vanC3 | 23A | 31.7  | 84.66 | 1.99 |                              |
| vanG        | 23A |       |       |      | NoAmplification              |
| vanHB       | 23A | 36.81 | 78.56 | 1.91 |                              |
| vanHD       | 23A | 33.03 | 82.91 | 2    |                              |
| vanRA-01    | 23A |       |       |      | NoAmplification              |
| vanRA-02    | 23A |       |       |      | NoAmplification              |
| vanRB       | 23A | 30.16 | 84.79 | 2.13 | MultipleMeltPeaks            |
| vanRC       | 23A |       |       |      | NoAmplification              |
| vanRC4      | 23A |       |       |      | NoAmplification              |
| vanRD       | 23A |       |       |      | NoAmplification              |
| vanSA       | 23A |       |       |      | NoAmplification              |
| vanSB       | 23A | 29.44 | 75.04 | 2.06 |                              |
| vanSC-01    | 23A | 33.82 | 83.98 | 1.98 |                              |
| vanSC-02    | 23A |       |       |      | NoAmplification              |
| vanTC-01    | 23A |       |       |      | LowEfficiency, CtIsSmall, Ci |
| vanTC-02    | 23A | 34.94 | 87.5  | 1.72 |                              |
| vanTE       | 23A | 33.28 | 88.29 | 1.88 |                              |
| vanTG       | 23A |       |       |      | NoAmplification              |
| vanWB       | 23A |       |       |      | BadR2, CtIsSmall, Saturatio  |
| vanWG       | 23A |       |       |      | NoAmplification              |
| vanXA       | 23A |       |       |      | CurveFitFailed               |
| vanXB       | 23A |       |       |      | NoAmplification              |
| vanXD       | 23A | 30.92 | 75.43 | 2.05 |                              |

|              |     |       |       |                        |
|--------------|-----|-------|-------|------------------------|
| vanYB        | 23A | 31.27 | 81.35 | 1.94                   |
| vanYD-01     | 23A | 29.82 | 82.82 | 1.93 MultipleMeltPeaks |
| vanYD-02     | 23A | 31.1  | 79.66 | 1.94                   |
| vatB-01      | 23A | 32.92 | 75.22 | 2.02                   |
| vatB-02      | 23A | 36.92 | 84.96 | 1.98 MultipleMeltPeaks |
| vatC-01      | 23A | 31.32 | 81.47 | 1.91                   |
| vatC-02      | 23A | 32.81 | 87.46 | 1.94                   |
| vatE-01      | 23A | 30.69 | 75.49 | 2.07                   |
| vatE-02      | 23A |       |       | NoAmplification        |
| vgaA-01      | 23A | 37.82 | 75.57 | 2.06 MultipleMeltPeaks |
| vgaA-02      | 23A |       |       | NoAmplification        |
| vgb-01       | 23A | 39.38 | 79.65 | 1.77 MultipleMeltPeaks |
| vgbB-01      | 23A | 34.73 | 75.47 | 1.8 MultipleMeltPeaks  |
| vgbB-02      | 23A |       |       | CurveFitFailed         |
| yceE/mdtG-0  | 23A | 33.9  | 77.09 | 2.12                   |
| yceE/mdtG-0  | 23A | 35.18 | 77.24 | 1.95                   |
| yceL/mdtH-0  | 23A | 29.94 | 83.65 | 1.87                   |
| yceL/mdtH-0  | 23A |       |       | NoAmplification        |
| yceL/mdtH-0  | 23A | 33.45 | 78.29 | 2.06 MultipleMeltPeaks |
| yidY/mdtL-01 | 23A | 30.7  | 83.88 | 2 MultipleMeltPeaks    |
| yidY/mdtL-02 | 23A |       |       | NoAmplification        |































| Assay          | Sample | Ct | Tm    | Efficiency | flag                         |
|----------------|--------|----|-------|------------|------------------------------|
| 16S rRNA       | 23B    |    | 14.11 | 82.49      | 2.19                         |
| aac            | 23B    |    | 29.66 | 86.59      | 1.95 MultipleMeltPeaks       |
| aac(6')-Ib(akz | 23B    |    | 33.21 | 79.09      | 1.93                         |
| aac(6')-Ib(akz | 23B    |    | 29.98 | 87.05      | 1.91                         |
| aac(6')-Ib(akz | 23B    |    | 31.76 | 85.27      | 1.94                         |
| aac(6')-II     | 23B    |    | 32.57 | 81.07      | 1.66 MultipleMeltPeaks       |
| aac(6')I1      | 23B    |    |       |            | BadR2, LowEfficiency, CtIsS  |
| aacA/aphD      | 23B    |    |       |            | CurveFitFailed               |
| aacC           | 23B    |    | 30.67 | 92.08      | 1.88                         |
| aacC1          | 23B    |    |       |            | LowEfficiency, CtIsSmall, S: |
| aacC2          | 23B    |    |       |            | CurveFitFailed               |
| aacC4          | 23B    |    | 32.55 | 87.54      | 1.91                         |
| aadA-01        | 23B    |    | 35.52 | 85.76      | 1.89                         |
| aadA-02        | 23B    |    | 35.65 | 80.4       | 1.88                         |
| aadA-1-01      | 23B    |    | 34.4  | 85.52      | 1.84                         |
| aadA-1-02      | 23B    |    |       |            | CurveFitFailed               |
| aadA1          | 23B    |    | 31.67 | 85.45      | 2.01                         |
| aadA2-01       | 23B    |    | 34.39 | 84.79      | 1.77                         |
| aadA2-02       | 23B    |    | 31.97 | 75.46      | 2                            |
| aadA2-03       | 23B    |    |       |            | LowEfficiency, CtIsSmall, Ci |
| aadA5-01       | 23B    |    | 32.17 | 88.65      | 1.87                         |
| aadA5-02       | 23B    |    | 32.52 | 83.24      | 1.96 MultipleMeltPeaks       |
| aadA9-01       | 23B    |    | 31.75 | 90.09      | 1.85                         |
| aadA9-02       | 23B    |    | 36.34 | 79.34      | 1.96                         |
| aadD           | 23B    |    |       |            | CurveFitFailed               |
| aadE           | 23B    |    |       |            | CurveFitFailed               |
| acrA-01        | 23B    |    | 29.68 | 88.77      | 1.83                         |
| acrA-02        | 23B    |    | 37.93 | 86.75      | 1.81 MultipleMeltPeaks       |
| acrA-03        | 23B    |    |       |            | CurveFitFailed               |
| acrA-04        | 23B    |    | 29.07 | 80.65      | 1.95                         |
| acrA-05        | 23B    |    | 31.24 | 82.21      | 1.96                         |
| acrB-01        | 23B    |    | 36.33 | 76.65      | 1.98                         |
| acrF           | 23B    |    | 24.63 | 84.37      | 1.85                         |
| acrR-01        | 23B    |    | 31.18 | 85.08      | 1.91                         |
| acrR-02        | 23B    |    | 33.1  | 86.21      | 1.94                         |
| Actin          | 23B    |    | 20.36 | 86.96      | 1.96                         |
| adeA           | 23B    |    |       |            | BadR2, LowEfficiency, CtIsS  |
| ampC-01        | 23B    |    | 29.92 | 84.55      | 1.89 MultipleMeltPeaks       |
| ampC-02        | 23B    |    | 33.12 | 85.05      | 1.92                         |
| ampC-04        | 23B    |    | 30.24 | 86.2       | 1.86 MultipleMeltPeaks       |
| ampC-05        | 23B    |    |       |            | CurveFitFailed               |
| ampC-06        | 23B    |    | 31.56 | 83.55      | 2.01 MultipleMeltPeaks       |
| ampC-07        | 23B    |    | 32.48 | 88.38      | 1.89                         |
| ampC-09        | 23B    |    |       |            | CurveFitFailed               |
| ampC/blaDH     | 23B    |    | 28.38 | 84.42      | 1.97                         |

|                          |     |       |       |      |                              |
|--------------------------|-----|-------|-------|------|------------------------------|
| aph                      | 23B |       |       |      | NoAmplification              |
| aph(2')-Id-01            | 23B |       |       |      | LowEfficiency, CtIsSmall, S: |
| aph(2')-Id-02            | 23B |       |       |      | CurveFitFailed               |
| aph6ia                   | 23B | 34.81 | 82.33 | 1.87 |                              |
| aphA1(aka k <sub>z</sub> | 23B |       |       |      | LowEfficiency, CtIsSmall, S: |
| bacA-01                  | 23B |       |       |      | CurveFitFailed               |
| bacA-02                  | 23B | 30.54 | 88.21 | 1.8  |                              |
| BETA-globin              | 23B | 22.53 | 83.96 | 1.97 | MultipleMeltPeaks            |
| bla-ACC-1                | 23B | 31.43 | 85.97 | 1.93 |                              |
| bla-L1                   | 23B | 28.28 | 85.93 | 2.02 |                              |
| bla1                     | 23B |       |       |      | CurveFitFailed               |
| blaCMY                   | 23B | 36.15 | 76.37 | 1.83 |                              |
| blaCMY2-01               | 23B | 33.22 | 85.16 | 1.98 |                              |
| blaCMY2-02               | 23B | 27.26 | 84.66 | 1.98 | MultipleMeltPeaks            |
| blaCTX-M-01              | 23B | 40.73 | 88.14 | 1.66 | MultipleMeltPeaks            |
| blaCTX-M-02              | 23B | 27.97 | 83.53 | 1.87 | MultipleMeltPeaks            |
| blaCTX-M-03              | 23B |       |       |      | CurveFitFailed               |
| blaCTX-M-04              | 23B | 34.82 | 85.96 | 1.81 | MultipleMeltPeaks            |
| blaCTX-M-05              | 23B | 30.19 | 83.97 | 1.73 |                              |
| blaCTX-M-06              | 23B | 35.07 | 82.1  | 1.93 |                              |
| blaGES                   | 23B |       |       |      | LowEfficiency, CtIsSmall, S: |
| blaIMP-01                | 23B |       |       |      | BadR2, LowEfficiency, CtIsS  |
| blaIMP-02                | 23B |       |       |      | CurveFitFailed               |
| blaMOX/blaC              | 23B | 34.87 | 88.24 | 1.9  | MultipleMeltPeaks            |
| blaOCH                   | 23B |       |       |      | NoAmplification              |
| blaOKP                   | 23B |       |       |      | NoAmplification              |
| blaOXA1/blaC             | 23B |       |       |      | LowEfficiency, CtIsSmall, C: |
| blaOXA10-01              | 23B |       |       |      | CurveFitFailed               |
| blaOXA10-02              | 23B |       |       |      | CurveFitFailed               |
| blaOXY                   | 23B | 31.12 | 88.23 | 1.82 | MultipleMeltPeaks            |
| blaPAO                   | 23B | 37.38 | 76.38 | 1.85 |                              |
| blaPER                   | 23B | 31.94 | 77.36 | 1.71 | MultipleMeltPeaks            |
| blaPSE                   | 23B |       |       |      | LowEfficiency, CtIsSmall, S: |
| blaROB                   | 23B | 38.67 | 85.8  | 1.56 | MultipleMeltPeaks            |
| blaSFO                   | 23B | 29.45 | 89.16 | 1.93 |                              |
| blaSHV-01                | 23B | 29.67 | 87.71 | 2.04 |                              |
| blaSHV-02                | 23B | 33.03 | 79.05 | 1.97 | MultipleMeltPeaks            |
| blaTEM                   | 23B | 33.66 | 82.1  | 1.94 |                              |
| blaTLA                   | 23B |       |       |      | CurveFitFailed               |
| blaVEB                   | 23B |       |       |      | LowEfficiency, CtIsSmall, S: |
| blaVIM                   | 23B |       |       |      | CurveFitFailed               |
| blaZ                     | 23B |       |       |      | LowEfficiency, CtIsSmall, S: |
| carB                     | 23B | 39.58 | 82.33 | 1.7  |                              |
| catA1                    | 23B |       |       |      | NoAmplification              |
| catB3                    | 23B | 35.14 | 80.06 | 1.9  |                              |
| catB8                    | 23B | 26.64 | 82.63 | 1.95 | MultipleMeltPeaks            |

|            |     |       |       |      |                              |
|------------|-----|-------|-------|------|------------------------------|
| ceoA       | 23B |       |       |      | NoAmplification              |
| cepA       | 23B |       |       |      | CurveFitFailed               |
| cfiA       | 23B | 29.2  | 87.28 | 1.94 |                              |
| cfr        | 23B |       |       |      | CurveFitFailed               |
| cfxA       | 23B | 28.57 | 77.59 | 2.05 |                              |
| cmeA       | 23B | 35.75 | 84.57 | 1.81 |                              |
| cmlA1-01   | 23B |       |       |      | CurveFitFailed               |
| cmlA1-02   | 23B | 30.44 | 81.61 | 1.9  | MultipleMeltPeaks            |
| cmr        | 23B |       |       |      | CurveFitFailed               |
| cmx(A)     | 23B | 26.34 | 86.03 | 2.02 | MultipleMeltPeaks            |
| cphA-01    | 23B | 28.38 | 90.98 | 1.93 | MultipleMeltPeaks            |
| cphA-02    | 23B | 30.36 | 82.89 | 2.01 | MultipleMeltPeaks            |
| dfrA1      | 23B | 33.47 | 81.26 | 1.92 |                              |
| dfrA12     | 23B | 34.82 | 85.85 | 1.76 |                              |
| emrD       | 23B | 32.66 | 81.21 | 1.85 |                              |
| ereA       | 23B | 30.45 | 82.45 | 1.91 |                              |
| ereB       | 23B | 34.41 | 85.68 | 1.92 | MultipleMeltPeaks            |
| erm(34)    | 23B |       |       |      | BadR2, LowEfficiency, CtIsS  |
| erm(35)    | 23B |       |       |      | CurveFitFailed               |
| erm(36)    | 23B |       |       |      | CurveFitFailed               |
| ermA       | 23B |       |       |      | LowEfficiency, CtIsSmall, S: |
| ermA/ermTR | 23B |       |       |      | NoAmplification              |
| ermB       | 23B | 28.99 | 74.96 | 2.06 |                              |
| ermC       | 23B |       |       |      | CurveFitFailed               |
| ermF       | 23B |       |       |      | LowEfficiency, CtIsSmall, S: |
| ermJ/ermD  | 23B |       |       |      | CurveFitFailed               |
| ermK-01    | 23B | 33.58 | 74.75 | 1.97 |                              |
| ermK-02    | 23B | 36.17 | 85.35 | 1.71 |                              |
| ermT-01    | 23B |       |       |      | CurveFitFailed               |
| ermT-02    | 23B | 33.2  | 79.57 | 1.97 |                              |
| ermX       | 23B | 31.22 | 87.25 | 1.86 |                              |
| ermY       | 23B |       |       |      | LowEfficiency, CtIsSmall, S: |
| fabK       | 23B | 18.66 | 77.71 | 2.23 |                              |
| floR       | 23B |       |       |      | NoAmplification              |
| folA       | 23B |       |       |      | CtIsLarge, CurveFitFailed    |
| fosB       | 23B |       |       |      | LowEfficiency, CtIsSmall, S: |
| fosX       | 23B |       |       |      | LowEfficiency, CtIsSmall, S: |
| fox5       | 23B | 25.07 | 87.3  | 1.92 | MultipleMeltPeaks            |
| imiR       | 23B |       |       |      | LowEfficiency, CtIsSmall, C: |
| ImrA-01    | 23B | 32.51 | 82.89 | 1.96 |                              |
| intl       | 23B | 28.49 | 84.86 | 2.01 | MultipleMeltPeaks            |
| intl1      | 23B | 19.08 | 87.33 | 2.1  |                              |
| IS613      | 23B | 29.98 | 79.61 | 1.98 |                              |
| lnuA-01    | 23B |       |       |      | LowEfficiency, CtIsSmall, S: |
| lnuB-01    | 23B |       |       |      | CurveFitFailed               |
| lnuB-02    | 23B |       |       |      | CurveFitFailed               |

|                |     |       |       |      |                              |
|----------------|-----|-------|-------|------|------------------------------|
| lnuC           | 23B | 34.2  | 84.07 | 1.78 |                              |
| marR-01        | 23B | 30.5  | 85.22 | 1.9  |                              |
| matA/mel       | 23B | 26.84 | 77.18 | 2.02 | MultipleMeltPeaks            |
| mdetI1         | 23B |       |       |      | LowEfficiency, CtIsSmall, S: |
| mdtA           | 23B | 34.68 | 82.41 | 1.82 |                              |
| mdtE/yhiU      | 23B |       |       |      | LowEfficiency, CtIsSmall, S: |
| mecA           | 23B |       |       |      | LowEfficiency, CtIsSmall, S: |
| mefA           | 23B | 27    | 80.28 | 1.96 | MultipleMeltPeaks            |
| mepA           | 23B | 29.52 | 87.45 | 1.97 |                              |
| mexA           | 23B |       |       |      | BadR2, LowEfficiency, CtIsS  |
| mexD           | 23B | 32.1  | 80.25 | 2    |                              |
| mexE           | 23B | 37.73 | 83.59 | 1.78 |                              |
| mexF           | 23B | 21.65 | 89.16 | 1.82 |                              |
| mphA-01        | 23B | 29.04 | 86.92 | 1.99 |                              |
| mphA-02        | 23B | 27.23 | 86.71 | 2.08 |                              |
| mphB           | 23B |       |       |      | CurveFitFailed               |
| mphC           | 23B |       |       |      | CurveFitFailed               |
| msrA-01        | 23B |       |       |      | LowEfficiency, CtIsSmall, Ci |
| msrC-01        | 23B |       |       |      | NoAmplification              |
| mtrC-01        | 23B |       |       |      | CurveFitFailed               |
| mtrC-02        | 23B | 30.12 | 84.34 | 1.92 |                              |
| mtrD-02        | 23B | 25.53 | 85.23 | 2.08 |                              |
| mtrD-03        | 23B | 29    | 86.76 | 1.87 | MultipleMeltPeaks            |
| NDM1           | 23B |       |       |      | CurveFitFailed               |
| nimE           | 23B |       |       |      | CurveFitFailed               |
| nisB           | 23B |       |       |      | CurveFitFailed               |
| oleC           | 23B | 32.63 | 84.29 | 1.89 |                              |
| oprD           | 23B | 26.41 | 86.45 | 2.01 | MultipleMeltPeaks            |
| oprJ           | 23B | 31.69 | 87.58 | 1.92 |                              |
| pbp            | 23B | 32.69 | 81.2  | 1.93 |                              |
| pbp2x          | 23B | 18.68 | 76.03 | 2.2  |                              |
| Pbp5           | 23B |       |       |      | LowEfficiency, CtIsSmall, S: |
| penA           | 23B | 31.64 | 84.14 | 1.8  | MultipleMeltPeaks            |
| pikR1          | 23B | 36.26 | 89.12 | 1.79 | MultipleMeltPeaks            |
| pikR2          | 23B | 30.88 | 85.13 | 2.08 |                              |
| pmrA           | 23B | 19.63 | 80.25 | 2.08 |                              |
| pncA           | 23B | 32.74 | 80.85 | 1.98 |                              |
| putative multi | 23B | 30.24 | 84.26 | 1.91 |                              |
| qac            | 23B | 34.32 | 78.82 | 1.93 |                              |
| qacA           | 23B |       |       |      | BadR2, LowEfficiency, CtIsS  |
| qacA/qacB      | 23B | 39.38 | 84.73 | 1.4  | MultipleMeltPeaks            |
| qacEdelta1-0   | 23B |       |       |      | CurveFitFailed               |
| qacEdelta1-0   | 23B | 33.2  | 89.65 | 1.87 |                              |
| qacH-01        | 23B | 30.65 | 86.55 | 1.91 |                              |
| qacH-02        | 23B | 32.83 | 84.04 | 1.69 |                              |
| qnrA           | 23B |       |       |      | LowEfficiency, CtIsSmall, Ci |



|              |     |       |       |      |                                          |
|--------------|-----|-------|-------|------|------------------------------------------|
| rarD-02      | 23B |       |       |      | CurveFitFailed                           |
| sat4         | 23B |       |       |      | CurveFitFailed                           |
| sdeB         | 23B |       |       |      | CurveFitFailed                           |
| spcN-01      | 23B |       |       |      | CurveFitFailed                           |
| speA         | 23B |       |       |      | LowEfficiency, CtIsSmall, Ct             |
| str          | 23B |       |       |      | LowEfficiency, CtIsSmall, S <sub>c</sub> |
| strA         | 23B |       |       |      | LowEfficiency, CtIsSmall, S <sub>c</sub> |
| strB         | 23B | 37.06 | 79.32 | 1.82 | MultipleMeltPeaks                        |
| sul1         | 23B | 30.92 | 89.84 | 1.84 |                                          |
| sul2         | 23B |       |       |      | LowEfficiency, CtIsSmall, S <sub>c</sub> |
| sulA/foIP-01 | 23B | 19.39 | 81.58 | 1.97 |                                          |
| sulA/foIP-03 | 23B | 18.21 | 83.4  | 2.04 |                                          |
| tet(32)      | 23B |       |       |      | LowEfficiency, CtIsSmall, S <sub>c</sub> |
| tet(34)      | 23B | 32.24 | 75.69 | 1.97 |                                          |
| tet(35)      | 23B | 36.6  | 80.86 | 1.9  | MultipleMeltPeaks                        |
| tet(36)-A    | 23B | 34.86 | 81.97 | 1.93 |                                          |
| tet(36)-B    | 23B |       |       |      | LowEfficiency, CtIsSmall, S <sub>c</sub> |
| tet(37)      | 23B | 28.39 | 82.79 | 1.93 | MultipleMeltPeaks                        |
| tetA-01      | 23B | 30.43 | 85.14 | 1.88 |                                          |
| tetA-02      | 23B | 34.79 | 80.67 | 1.94 | MultipleMeltPeaks                        |
| tetB-01      | 23B | 31.06 | 88.95 | 1.91 | MultipleMeltPeaks                        |
| tetB-02      | 23B | 33.56 | 76.04 | 1.95 |                                          |
| tetC-01      | 23B |       |       |      | NoAmplification                          |
| tetC-02      | 23B |       |       |      | CurveFitFailed                           |
| tetD-01      | 23B |       |       |      | LowEfficiency, CtIsSmall, S <sub>c</sub> |
| tetD-02      | 23B | 35.49 | 82.12 | 1.9  |                                          |
| tetE         | 23B |       |       |      | CurveFitFailed                           |
| tetG-01      | 23B | 32    | 82.14 | 2.25 | MultipleMeltPeaks                        |
| tetG-02      | 23B | 26.58 | 82.67 | 1.93 |                                          |
| tetH         | 23B |       |       |      | LowEfficiency, CtIsSmall, Ct             |
| tetJ         | 23B |       |       |      | LowEfficiency, CtIsSmall, S <sub>c</sub> |
| tetK         | 23B |       |       |      | LowEfficiency, CtIsSmall, S <sub>c</sub> |
| tetL-01      | 23B | 35.88 | 88.92 | 1.8  | MultipleMeltPeaks                        |
| tetL-02      | 23B | 30.33 | 85.22 | 1.82 |                                          |
| tetM-01      | 23B | 26.8  | 78.07 | 1.99 |                                          |
| tetM-02      | 23B | 26.53 | 77.55 | 2    |                                          |
| tetO-01      | 23B |       |       |      | LowEfficiency, CtIsSmall, S <sub>c</sub> |
| tetPA        | 23B |       |       |      | CurveFitFailed                           |
| tetPB-01     | 23B | 38.05 | 79.46 | 1.91 | MultipleMeltPeaks                        |
| tetPB-02     | 23B | 28.9  | 84.83 | 1.96 |                                          |
| tetPB-03     | 23B |       |       |      | CurveFitFailed                           |
| tetPB-05     | 23B |       |       |      | CurveFitFailed                           |
| tetQ         | 23B | 28.24 | 75.95 | 1.97 |                                          |
| tetR-02      | 23B | 29.65 | 90.29 | 1.9  |                                          |
| tetR-03      | 23B |       |       |      | LowEfficiency, CtIsSmall, Ct             |
| tetS         | 23B |       |       |      | CurveFitFailed                           |

|             |     |       |       |      |                              |
|-------------|-----|-------|-------|------|------------------------------|
| tetT        | 23B |       |       |      | CurveFitFailed               |
| tetU-01     | 23B |       |       |      | LowEfficiency, CtIsSmall, S: |
| tetV        | 23B |       |       |      | NoAmplification              |
| tetW-01     | 23B |       |       |      | LowEfficiency, CtIsSmall, S: |
| tetX        | 23B |       |       |      | LowEfficiency, CtIsSmall, C: |
| tnpA-01     | 23B |       |       |      | CurveFitFailed               |
| tnpA-02     | 23B | 33.07 | 85.97 | 1.75 |                              |
| tnpA-03     | 23B |       |       |      | CurveFitFailed               |
| tnpA-04     | 23B | 35    | 81.32 | 1.9  |                              |
| tnpA-05     | 23B | 29.35 | 80.78 | 1.91 |                              |
| tnpA-07     | 23B |       |       |      | LowEfficiency, CtIsSmall, C: |
| tolC-01     | 23B | 32.97 | 80.24 | 1.87 |                              |
| tolC-02     | 23B | 29.39 | 83.85 | 1.95 | MultipleMeltPeaks            |
| tolC-03     | 23B | 28.9  | 85.73 | 1.94 |                              |
| Tp614       | 23B | 31.55 | 83.36 | 1.9  |                              |
| ttgA        | 23B |       |       |      | NoAmplification              |
| ttgB        | 23B | 31.46 | 87.97 | 1.96 |                              |
| vanA        | 23B |       |       |      | LowEfficiency, CtIsSmall, S: |
| vanB-01     | 23B | 29.63 | 84.39 | 2.01 |                              |
| vanC-01     | 23B |       |       |      | CurveFitFailed               |
| vanC-02     | 23B |       |       |      | LowEfficiency, CtIsSmall, S: |
| vanC-03     | 23B | 25.63 | 86.15 | 1.96 | MultipleMeltPeaks            |
| vanC1       | 23B |       |       |      | CurveFitFailed               |
| vanC2/vanC3 | 23B | 32.51 | 79.63 | 2.08 | MultipleMeltPeaks            |
| vanG        | 23B |       |       |      | LowEfficiency, CtIsSmall, C: |
| vanHB       | 23B | 37.61 | 81.56 | 1.81 |                              |
| vanHD       | 23B | 35.74 | 83.44 | 1.8  |                              |
| vanRA-01    | 23B |       |       |      | CurveFitFailed               |
| vanRA-02    | 23B |       |       |      | CurveFitFailed               |
| vanRB       | 23B | 31.02 | 87.58 | 1.97 |                              |
| vanRC       | 23B |       |       |      | LowEfficiency, CtIsSmall, S: |
| vanRC4      | 23B |       |       |      | LowEfficiency, CtIsSmall, S: |
| vanRD       | 23B |       |       |      | LowEfficiency, CtIsSmall, S: |
| vanSA       | 23B |       |       |      | LowEfficiency, CtIsSmall, S: |
| vanSB       | 23B | 28.62 | 75.28 | 2.06 |                              |
| vanSC-01    | 23B | 31.32 | 84.1  | 1.95 |                              |
| vanSC-02    | 23B |       |       |      | NoAmplification              |
| vanTC-01    | 23B |       |       |      | LowEfficiency, CtIsSmall, S: |
| vanTC-02    | 23B | 33.91 | 87.46 | 1.76 |                              |
| vanTE       | 23B | 38.85 | 77.99 | 1.68 | MultipleMeltPeaks            |
| vanTG       | 23B | 37.65 | 74    | 1.89 |                              |
| vanWB       | 23B |       |       |      | LowEfficiency, CtIsSmall, S: |
| vanWG       | 23B |       |       |      | LowEfficiency, CtIsSmall, S: |
| vanXA       | 23B |       |       |      | CurveFitFailed               |
| vanXB       | 23B |       |       |      | NoAmplification              |
| vanXD       | 23B | 34.15 | 74.98 | 1.98 |                              |

|              |     |       |       |      |                              |
|--------------|-----|-------|-------|------|------------------------------|
| vanYB        | 23B |       |       |      | CurveFitFailed               |
| vanYD-01     | 23B | 33.68 | 82.75 | 1.82 |                              |
| vanYD-02     | 23B |       |       |      | LowEfficiency, CtIsSmall, S  |
| vatB-01      | 23B | 37.39 | 76.46 | 1.79 | MultipleMeltPeaks            |
| vatB-02      | 23B |       |       |      | BadR2, LowEfficiency, CtIsS  |
| vatC-01      | 23B | 34.19 | 81.18 | 1.85 |                              |
| vatC-02      | 23B |       |       |      | CurveFitFailed               |
| vatE-01      | 23B | 29.06 | 77.73 | 2.09 |                              |
| vatE-02      | 23B |       |       |      | CurveFitFailed               |
| vgaA-01      | 23B |       |       |      | CurveFitFailed               |
| vgaA-02      | 23B |       |       |      | CurveFitFailed               |
| vgb-01       | 23B |       |       |      | CurveFitFailed               |
| vgbB-01      | 23B | 35.24 | 75.64 | 1.71 |                              |
| vgbB-02      | 23B |       |       |      | CurveFitFailed               |
| yceE/mdtG-0  | 23B | 34.52 | 81.19 | 1.94 |                              |
| yceE/mdtG-0  | 23B | 34.57 | 81.62 | 1.84 |                              |
| yceL/mdtH-0  | 23B | 28.45 | 83.89 | 1.95 |                              |
| yceL/mdtH-0  | 23B |       |       |      | LowEfficiency, CtIsSmall, Ci |
| yceL/mdtH-0  | 23B | 34.53 | 77.87 | 1.93 |                              |
| yidY/mdtL-01 | 23B | 28.48 | 88.45 | 1.92 |                              |
| yidY/mdtL-02 | 23B |       |       |      | LowEfficiency, CtIsSmall, S  |































| Assay          | Sample | Ct | Tm    | Efficiency | flag                         |
|----------------|--------|----|-------|------------|------------------------------|
| 16S rRNA       | 23C    |    | 16.27 | 81.24      | 2.02                         |
| aac            | 23C    |    | 29.04 | 81.51      | 1.78 MultipleMeltPeaks       |
| aac(6')-Ib(akz | 23C    |    |       |            | LowEfficiency, CtIsSmall, Ci |
| aac(6')-Ib(akz | 23C    |    | 28.01 | 82.24      | 1.99 MultipleMeltPeaks       |
| aac(6')-Ib(akz | 23C    |    | 30.02 | 83.83      | 2.04 MultipleMeltPeaks       |
| aac(6')-II     | 23C    |    | 35.24 | 78.37      | 1.76                         |
| aac(6')I1      | 23C    |    |       |            | CurveFitFailed               |
| aacA/aphD      | 23C    |    |       |            | NoAmplification              |
| aacC           | 23C    |    | 33.26 | 91.83      | 1.91                         |
| aacC1          | 23C    |    |       |            | LowEfficiency, CtIsSmall, Ci |
| aacC2          | 23C    |    |       |            | NoAmplification              |
| aacC4          | 23C    |    |       |            | NoAmplification              |
| aadA-01        | 23C    |    |       |            | LowEfficiency, CtIsSmall, Ci |
| aadA-02        | 23C    |    | 36.3  | 80.42      | 1.95                         |
| aadA-1-01      | 23C    |    | 32.18 | 85.48      | 1.93                         |
| aadA-1-02      | 23C    |    |       |            | LowEfficiency, CtIsSmall, Ci |
| aadA1          | 23C    |    | 30.69 | 83.91      | 2.08                         |
| aadA2-01       | 23C    |    | 33.63 | 81.72      | 1.89                         |
| aadA2-02       | 23C    |    | 31.77 | 75.27      | 2.05                         |
| aadA2-03       | 23C    |    |       |            | CurveFitFailed               |
| aadA5-01       | 23C    |    | 31.28 | 88.43      | 1.9 MultipleMeltPeaks        |
| aadA5-02       | 23C    |    | 31.71 | 83.27      | 2.03 MultipleMeltPeaks       |
| aadA9-01       | 23C    |    |       |            | CurveFitFailed               |
| aadA9-02       | 23C    |    |       |            | LowEfficiency, CtIsSmall, Ci |
| aadD           | 23C    |    |       |            | LowEfficiency, CtIsSmall, Ci |
| aadE           | 23C    |    |       |            | NoAmplification              |
| acrA-01        | 23C    |    | 29.59 | 88.68      | 1.94                         |
| acrA-02        | 23C    |    | 36.77 | 87.77      | 1.79                         |
| acrA-03        | 23C    |    |       |            | LowEfficiency, CtIsSmall, Ci |
| acrA-04        | 23C    |    | 28.44 | 80.53      | 1.97 MultipleMeltPeaks       |
| acrA-05        | 23C    |    | 29.98 | 88.28      | 1.93                         |
| acrB-01        | 23C    |    |       |            | BadR2, LowEfficiency, CtIsS  |
| acrF           | 23C    |    | 25.9  | 82.76      | 1.86                         |
| acrR-01        | 23C    |    | 33.31 | 89.65      | 1.92 MultipleMeltPeaks       |
| acrR-02        | 23C    |    | 33.72 | 86.36      | 1.97                         |
| Actin          | 23C    |    | 19.14 | 86.81      | 2.17                         |
| adeA           | 23C    |    |       |            | LowEfficiency, CtIsSmall, Ci |
| ampC-01        | 23C    |    | 31.42 | 84.52      | 2.01                         |
| ampC-02        | 23C    |    |       |            | CurveFitFailed               |
| ampC-04        | 23C    |    | 33.71 | 78.52      | 1.8                          |
| ampC-05        | 23C    |    |       |            | NoAmplification              |
| ampC-06        | 23C    |    |       |            | LowEfficiency, CtIsSmall, Ci |
| ampC-07        | 23C    |    | 32.94 | 88.29      | 1.86                         |
| ampC-09        | 23C    |    |       |            | LowEfficiency, CtIsSmall, Ci |
| ampC/blaDH     | 23C    |    | 28.36 | 85.42      | 1.99                         |

|                            |     |       |       |      |                              |
|----------------------------|-----|-------|-------|------|------------------------------|
| aph                        | 23C |       |       |      | LowEfficiency, CtIsSmall, Ci |
| aph(2')-Id-01              | 23C |       |       |      | LowEfficiency, CtIsSmall, Ci |
| aph(2')-Id-02              | 23C |       |       |      | LowEfficiency, CtIsSmall, Ci |
| aph6ia                     | 23C |       |       |      | LowEfficiency, CtIsSmall, Ci |
| aphA1(aka k <sub>a</sub> ) | 23C | 35.66 | 77.94 | 1.89 | MultipleMeltPeaks            |
| bacA-01                    | 23C | 34.42 | 87.11 | 1.97 |                              |
| bacA-02                    | 23C |       |       |      | CurveFitFailed               |
| BETA-globin                | 23C | 20.3  | 83.97 | 1.98 |                              |
| bla-ACC-1                  | 23C | 34.74 | 86.32 | 1.88 | MultipleMeltPeaks            |
| bla-L1                     | 23C | 28.26 | 85.45 | 2.03 |                              |
| bla1                       | 23C |       |       |      | LowEfficiency, CtIsSmall, Ci |
| blaCMY                     | 23C |       |       |      | BadR2, LowEfficiency, CtIsS  |
| blaCMY2-01                 | 23C | 32.91 | 82.32 | 2.04 |                              |
| blaCMY2-02                 | 23C | 27.53 | 84.75 | 2.03 | MultipleMeltPeaks            |
| blaCTX-M-01                | 23C |       |       |      | LowEfficiency, CtIsSmall, Ci |
| blaCTX-M-02                | 23C | 29.76 | 79.57 | 1.9  | MultipleMeltPeaks            |
| blaCTX-M-03                | 23C |       |       |      | LowEfficiency, CtIsSmall, Ci |
| blaCTX-M-04                | 23C | 35.52 | 85.07 | 1.84 |                              |
| blaCTX-M-05                | 23C | 33.85 | 76.05 | 1.75 |                              |
| blaCTX-M-06                | 23C |       |       |      | LowEfficiency, CtIsSmall, Ci |
| blaGES                     | 23C |       |       |      | NoAmplification              |
| blaIMP-01                  | 23C |       |       |      | NoAmplification              |
| blaIMP-02                  | 23C |       |       |      | LowEfficiency, CtIsSmall, Ci |
| blaMOX/blaC                | 23C |       |       |      | CurveFitFailed               |
| blaOCH                     | 23C |       |       |      | NoAmplification              |
| blaOKP                     | 23C |       |       |      | NoAmplification              |
| blaOXA1/blaC               | 23C |       |       |      | LowEfficiency, CtIsSmall, Ci |
| blaOXA10-01                | 23C | 34.17 | 78.34 | 1.96 |                              |
| blaOXA10-02                | 23C |       |       |      | LowEfficiency, CtIsSmall, Ci |
| blaOXY                     | 23C | 33.44 | 89.16 | 1.82 |                              |
| blaPAO                     | 23C |       |       |      | LowEfficiency, CtIsSmall, Ci |
| blaPER                     | 23C |       |       |      | CurveFitFailed               |
| blaPSE                     | 23C |       |       |      | LowEfficiency, CtIsSmall, Ci |
| blaROB                     | 23C |       |       |      | NoAmplification              |
| blaSFO                     | 23C | 29.16 | 89.53 | 1.98 |                              |
| blaSHV-01                  | 23C |       |       |      | NoAmplification              |
| blaSHV-02                  | 23C |       |       |      | NoAmplification              |
| blaTEM                     | 23C |       |       |      | NoAmplification              |
| blaTLA                     | 23C |       |       |      | LowEfficiency, CtIsSmall, Ci |
| blaVEB                     | 23C |       |       |      | LowEfficiency, CtIsSmall, Ci |
| blaVIM                     | 23C |       |       |      | NoAmplification              |
| blaZ                       | 23C |       |       |      | LowEfficiency, CtIsSmall, Ci |
| carB                       | 23C | 33.85 | 82    | 1.96 | MultipleMeltPeaks            |
| catA1                      | 23C |       |       |      | NoAmplification              |
| catB3                      | 23C | 30.54 | 87.48 | 2.08 |                              |
| catB8                      | 23C | 29.83 | 84.3  | 1.92 | MultipleMeltPeaks            |

|            |     |       |       |      |                              |
|------------|-----|-------|-------|------|------------------------------|
| ceoA       | 23C | 28.35 | 82.09 | 2.02 |                              |
| cepA       | 23C |       |       |      | LowEfficiency, CtIsSmall, Ci |
| cfiA       | 23C | 30.35 | 86.86 | 1.91 |                              |
| cfr        | 23C |       |       |      | LowEfficiency, CtIsSmall, Ci |
| cfxA       | 23C | 27.54 | 77.45 | 2.06 |                              |
| cmeA       | 23C | 35.58 | 83.74 | 1.86 | MultipleMeltPeaks            |
| cmlA1-01   | 23C | 36.43 | 81.11 | 1.92 | MultipleMeltPeaks            |
| cmlA1-02   | 23C |       |       |      | LowEfficiency, CtIsSmall, Ci |
| cmr        | 23C |       |       |      | CurveFitFailed               |
| cmx(A)     | 23C | 27.78 | 84.35 | 1.94 |                              |
| cphA-01    | 23C | 32.3  | 85.77 | 1.99 |                              |
| cphA-02    | 23C | 31.17 | 82.37 | 1.95 |                              |
| dfrA1      | 23C | 37.31 | 79.72 | 1.83 |                              |
| dfrA12     | 23C | 38.97 | 85.75 | 1.65 |                              |
| emrD       | 23C |       |       |      | LowEfficiency, CtIsSmall, Ci |
| ereA       | 23C | 33.16 | 82.32 | 1.96 |                              |
| ereB       | 23C | 33.33 | 85.47 | 2.29 |                              |
| erm(34)    | 23C |       |       |      | NoAmplification              |
| erm(35)    | 23C |       |       |      | CurveFitFailed               |
| erm(36)    | 23C |       |       |      | NoAmplification              |
| ermA       | 23C |       |       |      | LowEfficiency, CtIsSmall, Ci |
| ermA/ermTR | 23C |       |       |      | NoAmplification              |
| ermB       | 23C | 23.19 | 74.66 | 2.16 |                              |
| ermC       | 23C |       |       |      | LowEfficiency, CtIsSmall, Ci |
| ermF       | 23C |       |       |      | LowEfficiency, CtIsSmall, Ci |
| ermJ/ermD  | 23C |       |       |      | LowEfficiency, CtIsSmall, S  |
| ermK-01    | 23C | 34.8  | 75.44 | 1.94 | MultipleMeltPeaks            |
| ermK-02    | 23C |       |       |      | NoAmplification              |
| ermT-01    | 23C |       |       |      | LowEfficiency, CtIsSmall, Ci |
| ermT-02    | 23C | 35.11 | 79.57 | 1.94 |                              |
| ermX       | 23C | 32.78 | 87.96 | 1.88 |                              |
| ermY       | 23C |       |       |      | LowEfficiency, CtIsSmall, Ci |
| fabK       | 23C | 27.19 | 82.48 | 2.27 | MultipleMeltPeaks            |
| floR       | 23C |       |       |      | NoAmplification              |
| folA       | 23C | 41.62 | 76.52 | 1.77 | MultipleMeltPeaks            |
| fosB       | 23C |       |       |      | LowEfficiency, CtIsSmall, Ci |
| fosX       | 23C |       |       |      | LowEfficiency, CtIsSmall, Ci |
| fox5       | 23C | 25.88 | 87.3  | 2    |                              |
| imiR       | 23C |       |       |      | LowEfficiency, CtIsSmall, Ci |
| ImrA-01    | 23C | 34.53 | 80.62 | 1.99 |                              |
| intl       | 23C | 29.11 | 84.53 | 1.96 | MultipleMeltPeaks            |
| intl1      | 23C | 20.04 | 87.15 | 2.07 |                              |
| IS613      | 23C |       |       |      | LowEfficiency, CtIsSmall, Ci |
| lnuA-01    | 23C |       |       |      | LowEfficiency, CtIsSmall, Ci |
| lnuB-01    | 23C |       |       |      | LowEfficiency, CtIsSmall, Ci |
| lnuB-02    | 23C |       |       |      | LowEfficiency, CtIsSmall, Ci |

|                |     |       |       |      |                              |
|----------------|-----|-------|-------|------|------------------------------|
| lnuC           | 23C | 33.27 | 86.77 | 1.85 |                              |
| marR-01        | 23C |       |       |      | CurveFitFailed               |
| matA/mel       | 23C | 24.49 | 77.18 | 2.06 | MultipleMeltPeaks            |
| mdet1          | 23C |       |       |      | LowEfficiency, CtIsSmall, Ci |
| mdtA           | 23C |       |       |      | CurveFitFailed               |
| mdtE/yhiU      | 23C |       |       |      | BadR2, LowEfficiency, CtIsS  |
| mecA           | 23C |       |       |      | LowEfficiency, CtIsSmall, Ci |
| mefA           | 23C | 24.79 | 80.34 | 2.01 |                              |
| mepA           | 23C | 31.97 | 87.11 | 2.06 |                              |
| mexA           | 23C |       |       |      | BadR2, LowEfficiency, CtIsS  |
| mexD           | 23C | 29.83 | 79.51 | 2.02 |                              |
| mexE           | 23C | 35.18 | 82.5  | 1.92 |                              |
| mexF           | 23C | 31.37 | 81.12 | 1.31 | MultipleMeltPeaks            |
| mphA-01        | 23C | 31.14 | 86.72 | 1.97 |                              |
| mphA-02        | 23C | 28.32 | 86.37 | 2.11 | MultipleMeltPeaks            |
| mphB           | 23C | 32.5  | 86.88 | 2    |                              |
| mphC           | 23C | 36.56 | 85.47 | 1.79 | MultipleMeltPeaks            |
| msrA-01        | 23C |       |       |      | LowEfficiency, CtIsSmall, Ci |
| msrC-01        | 23C |       |       |      | NoAmplification              |
| mtrC-01        | 23C |       |       |      | LowEfficiency, CtIsSmall, Ci |
| mtrC-02        | 23C |       |       |      | NoAmplification              |
| mtrD-02        | 23C | 28.21 | 81.08 | 1.87 | MultipleMeltPeaks            |
| mtrD-03        | 23C | 36.83 | 83.67 | 1.85 | MultipleMeltPeaks            |
| NDM1           | 23C |       |       |      | LowEfficiency, CtIsSmall, Ci |
| nimE           | 23C |       |       |      | LowEfficiency, CtIsSmall, Ci |
| nisB           | 23C |       |       |      | NoAmplification              |
| oleC           | 23C | 35.92 | 87.7  | 1.88 |                              |
| oprD           | 23C | 27.85 | 86.68 | 2.05 |                              |
| oprJ           | 23C | 35.8  | 90.33 | 1.74 |                              |
| pbp            | 23C | 33.13 | 81.53 | 1.9  |                              |
| pbp2x          | 23C |       |       |      | LowEfficiency, CtIsSmall, Ci |
| Pbp5           | 23C |       |       |      | LowEfficiency, CtIsSmall, Ci |
| penA           | 23C |       |       |      | CurveFitFailed               |
| pikR1          | 23C |       |       |      | BadR2, LowEfficiency, CtIsS  |
| pikR2          | 23C |       |       |      | CurveFitFailed               |
| pmrA           | 23C | 31.84 | 79.88 | 2.07 |                              |
| pncA           | 23C | 32.18 | 85.95 | 2.03 | MultipleMeltPeaks            |
| putative multi | 23C | 31.15 | 84.03 | 1.95 |                              |
| qac            | 23C |       |       |      | CurveFitFailed               |
| qacA           | 23C | 33.44 | 70.67 | 1.87 |                              |
| qacA/qacB      | 23C |       |       |      | LowEfficiency, CtIsSmall, Ci |
| qacEdelta1-0   | 23C |       |       |      | LowEfficiency, CtIsSmall, Ci |
| qacEdelta1-0   | 23C | 34.66 | 75.71 | 1.99 |                              |
| qacH-01        | 23C | 32.88 | 86.31 | 1.92 |                              |
| qacH-02        | 23C |       |       |      | CurveFitFailed               |
| qnrA           | 23C | 31.75 | 83.98 | 1.97 |                              |

|              |     |       |       |      |                              |
|--------------|-----|-------|-------|------|------------------------------|
| rarD-02      | 23C |       |       |      | NoAmplification              |
| sat4         | 23C |       |       |      | CurveFitFailed               |
| sdeB         | 23C |       |       |      | LowEfficiency, CtIsSmall, Ci |
| spcN-01      | 23C |       |       |      | LowEfficiency, CtIsSmall, Ci |
| speA         | 23C |       |       |      | LowEfficiency, CtIsSmall, Ci |
| str          | 23C |       |       |      | LowEfficiency, CtIsSmall, Ci |
| strA         | 23C |       |       |      | LowEfficiency, CtIsSmall, Ci |
| strB         | 23C | 33.23 | 79    | 1.95 |                              |
| sul1         | 23C | 35.09 | 85.93 | 1.76 | MultipleMeltPeaks            |
| sul2         | 23C |       |       |      | LowEfficiency, CtIsSmall, Ci |
| sulA/foIP-01 | 23C |       |       |      | LowEfficiency, CtIsSmall, Ci |
| sulA/foIP-03 | 23C | 26.03 | 83.57 | 2.06 |                              |
| tet(32)      | 23C | 30.62 | 80.85 | 1.93 |                              |
| tet(34)      | 23C | 32.03 | 75.32 | 1.98 |                              |
| tet(35)      | 23C |       |       |      | NoAmplification              |
| tet(36)-A    | 23C | 33.42 | 81.66 | 2.04 |                              |
| tet(36)-B    | 23C |       |       |      | NoAmplification              |
| tet(37)      | 23C | 30.24 | 87    | 1.93 | MultipleMeltPeaks            |
| tetA-01      | 23C | 29.42 | 85.02 | 1.94 |                              |
| tetA-02      | 23C | 35.21 | 89.83 | 1.91 |                              |
| tetB-01      | 23C | 32.66 | 86.14 | 2.01 |                              |
| tetB-02      | 23C | 31.27 | 74.69 | 2.02 |                              |
| tetC-01      | 23C |       |       |      | NoAmplification              |
| tetC-02      | 23C | 31.48 | 82.82 | 2.04 |                              |
| tetD-01      | 23C |       |       |      | LowEfficiency, CtIsSmall, Ci |
| tetD-02      | 23C | 35.63 | 76.04 | 2.1  |                              |
| tetE         | 23C |       |       |      | LowEfficiency, CtIsSmall, Ci |
| tetG-01      | 23C | 30.51 | 89.26 | 1.99 | MultipleMeltPeaks            |
| tetG-02      | 23C |       |       |      | LowEfficiency, CtIsSmall, Ci |
| tetH         | 23C |       |       |      | LowEfficiency, CtIsSmall, Ci |
| tetJ         | 23C |       |       |      | LowEfficiency, CtIsSmall, Ci |
| tetK         | 23C |       |       |      | LowEfficiency, CtIsSmall, Ci |
| tetL-01      | 23C |       |       |      | LowEfficiency, CtIsSmall, Ci |
| tetL-02      | 23C | 34.3  | 85.14 | 1.73 |                              |
| tetM-01      | 23C | 23.51 | 75.69 | 2.05 |                              |
| tetM-02      | 23C | 24.29 | 77.63 | 2.04 |                              |
| tetO-01      | 23C |       |       |      | LowEfficiency, CtIsSmall, S: |
| tetPA        | 23C |       |       |      | LowEfficiency, CtIsSmall, Ci |
| tetPB-01     | 23C |       |       |      | LowEfficiency, CtIsSmall, Ci |
| tetPB-02     | 23C | 27.66 | 84.83 | 2.05 |                              |
| tetPB-03     | 23C |       |       |      | LowEfficiency, CtIsSmall, Ci |
| tetPB-05     | 23C |       |       |      | LowEfficiency, CtIsSmall, Ci |
| tetQ         | 23C | 27.99 | 75.6  | 2.06 |                              |
| tetR-02      | 23C | 30.79 | 89.73 | 1.83 |                              |
| tetR-03      | 23C |       |       |      | LowEfficiency, CtIsSmall, Ci |
| tetS         | 23C | 32.66 | 85.17 | 1.87 |                              |

|             |     |       |       |      |                              |
|-------------|-----|-------|-------|------|------------------------------|
| tetT        | 23C |       |       |      | LowEfficiency, CtIsSmall, Ci |
| tetU-01     | 23C |       |       |      | LowEfficiency, CtIsSmall, Ci |
| tetV        | 23C |       |       |      | LowEfficiency, CtIsSmall, Ci |
| tetW-01     | 23C |       |       |      | CurveFitFailed               |
| tetX        | 23C |       |       |      | CurveFitFailed               |
| tnpA-01     | 23C |       |       |      | LowEfficiency, CtIsSmall, Ci |
| tnpA-02     | 23C | 32.35 | 84.99 | 1.82 | MultipleMeltPeaks            |
| tnpA-03     | 23C | 37.43 | 73.64 | 1.9  | MultipleMeltPeaks            |
| tnpA-04     | 23C |       |       |      | LowEfficiency, CtIsSmall, Ci |
| tnpA-05     | 23C |       |       |      | BadR2, LowEfficiency, CtIsS  |
| tnpA-07     | 23C |       |       |      | LowEfficiency, CtIsSmall, Ci |
| tolC-01     | 23C |       |       |      | CurveFitFailed               |
| tolC-02     | 23C | 30.19 | 83.34 | 1.91 | MultipleMeltPeaks            |
| tolC-03     | 23C | 31.05 | 87.15 | 1.95 |                              |
| Tp614       | 23C | 32.53 | 81.57 | 2.03 |                              |
| ttgA        | 23C |       |       |      | LowEfficiency, CtIsSmall, Ci |
| ttgB        | 23C |       |       |      | LowEfficiency, CtIsSmall, S  |
| vanA        | 23C |       |       |      | LowEfficiency, CtIsSmall, Ci |
| vanB-01     | 23C | 33.89 | 84.57 | 1.92 |                              |
| vanC-01     | 23C |       |       |      | LowEfficiency, CtIsSmall, Ci |
| vanC-02     | 23C |       |       |      | LowEfficiency, CtIsSmall, Ci |
| vanC-03     | 23C | 24.53 | 85.59 | 2.01 | MultipleMeltPeaks            |
| vanC1       | 23C |       |       |      | LowEfficiency, CtIsSmall, Ci |
| vanC2/vanC3 | 23C | 32.58 | 84.71 | 2.05 |                              |
| vanG        | 23C |       |       |      | LowEfficiency, CtIsSmall, Ci |
| vanHB       | 23C |       |       |      | LowEfficiency, CtIsSmall, Ci |
| vanHD       | 23C | 34.34 | 78.97 | 1.87 | MultipleMeltPeaks            |
| vanRA-01    | 23C |       |       |      | LowEfficiency, CtIsSmall, Ci |
| vanRA-02    | 23C |       |       |      | NoAmplification              |
| vanRB       | 23C | 32.75 | 81.3  | 1.67 | MultipleMeltPeaks            |
| vanRC       | 23C |       |       |      | LowEfficiency, CtIsSmall, Ci |
| vanRC4      | 23C |       |       |      | LowEfficiency, CtIsSmall, Ci |
| vanRD       | 23C |       |       |      | BadR2, LowEfficiency, CtIsS  |
| vanSA       | 23C |       |       |      | LowEfficiency, CtIsSmall, S  |
| vanSB       | 23C | 33.04 | 74.48 | 2.07 |                              |
| vanSC-01    | 23C | 35.5  | 83.98 | 1.91 |                              |
| vanSC-02    | 23C |       |       |      | NoAmplification              |
| vanTC-01    | 23C |       |       |      | LowEfficiency, CtIsSmall, Ci |
| vanTC-02    | 23C | 38.49 | 82.65 | 1.78 | MultipleMeltPeaks            |
| vanTE       | 23C |       |       |      | LowEfficiency, CtIsSmall, Ci |
| vanTG       | 23C |       |       |      | LowEfficiency, CtIsSmall, Ci |
| vanWB       | 23C |       |       |      | LowEfficiency, CtIsSmall, Ci |
| vanWG       | 23C | 33.55 | 74.87 | 2.03 |                              |
| vanXA       | 23C | 36.43 | 79.42 | 1.86 | MultipleMeltPeaks            |
| vanXB       | 23C |       |       |      | LowEfficiency, CtIsSmall, Ci |
| vanXD       | 23C | 31.27 | 75.24 | 2.07 |                              |

|              |     |       |       |      |                              |
|--------------|-----|-------|-------|------|------------------------------|
| vanYB        | 23C | 32.53 | 84.71 | 1.98 |                              |
| vanYD-01     | 23C | 29.21 | 82.45 | 1.93 | MultipleMeltPeaks            |
| vanYD-02     | 23C | 31.53 | 79.65 | 1.94 |                              |
| vatB-01      | 23C |       |       |      | NoAmplification              |
| vatB-02      | 23C | 34.39 | 71.23 | 2.09 | MultipleMeltPeaks            |
| vatC-01      | 23C |       |       |      | NoAmplification              |
| vatC-02      | 23C |       |       |      | CurveFitFailed               |
| vatE-01      | 23C | 31.56 | 75.66 | 2.07 |                              |
| vatE-02      | 23C |       |       |      | NoAmplification              |
| vgaA-01      | 23C |       |       |      | LowEfficiency, CtIsSmall, Ci |
| vgaA-02      | 23C |       |       |      | CurveFitFailed               |
| vgb-01       | 23C | 34.52 | 87.78 | 1.93 |                              |
| vgbB-01      | 23C |       |       |      | CurveFitFailed               |
| vgbB-02      | 23C |       |       |      | LowEfficiency, CtIsSmall, Ci |
| yceE/mdtG-0  | 23C | 34.77 | 77.3  | 2.05 |                              |
| yceE/mdtG-0  | 23C | 32.11 | 81.71 | 2.11 |                              |
| yceL/mdtH-0  | 23C | 29.37 | 81.83 | 1.73 | MultipleMeltPeaks            |
| yceL/mdtH-0  | 23C |       |       |      | LowEfficiency, CtIsSmall, Ci |
| yceL/mdtH-0  | 23C | 34.46 | 77.5  | 1.94 | MultipleMeltPeaks            |
| yidY/mdtL-01 | 23C | 29.76 | 81.81 | 2.05 | MultipleMeltPeaks            |
| yidY/mdtL-02 | 23C |       |       |      | LowEfficiency, CtIsSmall, Ci |































| Assay          | Sample | Ct | Tm    | Efficiency | flag                         |
|----------------|--------|----|-------|------------|------------------------------|
| 16S rRNA       | 24A    |    | 15.03 | 82.54      | 1.99                         |
| aac            | 24A    |    | 37.49 | 64.61      | 1.68 MultipleMeltPeaks       |
| aac(6')-Ib(akε | 24A    |    |       |            | NoAmplification              |
| aac(6')-Ib(akε | 24A    |    | 34    | 80.49      | 1.88 MultipleMeltPeaks       |
| aac(6')-Ib(akε | 24A    |    | 34.2  | 90.03      | 1.87                         |
| aac(6')-II     | 24A    |    |       |            | CurveFitFailed               |
| aac(6')I1      | 24A    |    |       |            | NoAmplification              |
| aacA/aphD      | 24A    |    |       |            | NoAmplification              |
| aacC           | 24A    |    | 34.27 | 84.16      | 1.8 MultipleMeltPeaks        |
| aacC1          | 24A    |    |       |            | NoAmplification              |
| aacC2          | 24A    |    |       |            | NoAmplification              |
| aacC4          | 24A    |    | 33.45 | 89.77      | 1.96                         |
| aadA-01        | 24A    |    |       |            | NoAmplification              |
| aadA-02        | 24A    |    |       |            | NoAmplification              |
| aadA-1-01      | 24A    |    |       |            | NoAmplification              |
| aadA-1-02      | 24A    |    |       |            | NoAmplification              |
| aadA1          | 24A    |    | 44.9  | 83.43      | 2.03 MultipleMeltPeaks       |
| aadA2-01       | 24A    |    |       |            | NoAmplification              |
| aadA2-02       | 24A    |    | 35.89 | 74.83      | 1.96                         |
| aadA2-03       | 24A    |    |       |            | CurveFitFailed               |
| aadA5-01       | 24A    |    |       |            | CurveFitFailed               |
| aadA5-02       | 24A    |    |       |            | NoAmplification              |
| aadA9-01       | 24A    |    |       |            | LowEfficiency, CtIsSmall, Ci |
| aadA9-02       | 24A    |    | 41.66 | 62.2       | 1.81 MultipleMeltPeaks       |
| aadD           | 24A    |    | 27.75 | 81.21      | 1.96                         |
| aadE           | 24A    |    |       |            | NoAmplification              |
| acrA-01        | 24A    |    | 24.57 | 83.08      | 1.95                         |
| acrA-02        | 24A    |    | 33.57 | 87.25      | 1.95 MultipleMeltPeaks       |
| acrA-03        | 24A    |    | 37    | 75.83      | 1.77 MultipleMeltPeaks       |
| acrA-04        | 24A    |    | 32.59 | 89.4       | 1.96                         |
| acrA-05        | 24A    |    | 32.69 | 79.62      | 1.93 MultipleMeltPeaks       |
| acrB-01        | 24A    |    | 39.83 | 75.03      | 1.86 MultipleMeltPeaks       |
| acrF           | 24A    |    |       |            | CurveFitFailed               |
| acrR-01        | 24A    |    |       |            | CurveFitFailed               |
| acrR-02        | 24A    |    | 38.73 | 79.89      | 1.75 MultipleMeltPeaks       |
| Actin          | 24A    |    | 22.05 | 87.16      | 1.92                         |
| adeA           | 24A    |    |       |            | NoAmplification              |
| ampC-01        | 24A    |    |       |            | CurveFitFailed               |
| ampC-02        | 24A    |    | 36.32 | 89.2       | 1.9                          |
| ampC-04        | 24A    |    | 32.6  | 78.51      | 1.87                         |
| ampC-05        | 24A    |    |       |            | NoAmplification              |
| ampC-06        | 24A    |    |       |            | CtIsLarge, CurveFitFailed    |
| ampC-07        | 24A    |    | 38.3  | 78.74      | 1.74 MultipleMeltPeaks       |
| ampC-09        | 24A    |    |       |            | CurveFitFailed               |
| ampC/blaDH     | 24A    |    | 31.05 | 84.9       | 1.95                         |

|                          |     |       |       |      |                                          |
|--------------------------|-----|-------|-------|------|------------------------------------------|
| aph                      | 24A |       |       |      | NoAmplification                          |
| aph(2')-Id-01            | 24A |       |       |      | NoAmplification                          |
| aph(2')-Id-02            | 24A |       |       |      | NoAmplification                          |
| aph6ia                   | 24A | 34.12 | 77.61 | 1.91 | MultipleMeltPeaks                        |
| aphA1(aka k <sub>z</sub> | 24A |       |       |      | NoAmplification                          |
| bacA-01                  | 24A |       |       |      | CtIsLarge, CurveFitFailed                |
| bacA-02                  | 24A |       |       |      | LowEfficiency, CtIsSmall, C <sub>t</sub> |
| BETA-globin              | 24A | 24.58 | 84.08 | 2    |                                          |
| bla-ACC-1                | 24A |       |       |      | NoAmplification                          |
| bla-L1                   | 24A | 30.31 | 87.67 | 1.96 |                                          |
| bla1                     | 24A |       |       |      | NoAmplification                          |
| blaCMY                   | 24A | 35.87 | 79.61 | 1.89 |                                          |
| blaCMY2-01               | 24A |       |       |      | CurveFitFailed                           |
| blaCMY2-02               | 24A | 30.7  | 86.6  | 1.97 |                                          |
| blaCTX-M-01              | 24A | 32.17 | 87.37 | 1.8  |                                          |
| blaCTX-M-02              | 24A | 43.46 | 79.14 | 1.66 | MultipleMeltPeaks                        |
| blaCTX-M-03              | 24A |       |       |      | CurveFitFailed                           |
| blaCTX-M-04              | 24A | 37.21 | 87    | 1.74 |                                          |
| blaCTX-M-05              | 24A | 38.38 | 75.64 | 1.56 |                                          |
| blaCTX-M-06              | 24A |       |       |      | NoAmplification                          |
| blaGES                   | 24A |       |       |      | NoAmplification                          |
| blaIMP-01                | 24A |       |       |      | NoAmplification                          |
| blaIMP-02                | 24A |       |       |      | CurveFitFailed                           |
| blaMOX/blaC              | 24A |       |       |      | NoAmplification                          |
| blaOCH                   | 24A | 31.54 | 85.46 | 1.92 |                                          |
| blaOKP                   | 24A |       |       |      | NoAmplification                          |
| blaOXA1/blaC             | 24A |       |       |      | NoAmplification                          |
| blaOXA10-01              | 24A |       |       |      | NoAmplification                          |
| blaOXA10-02              | 24A |       |       |      | NoAmplification                          |
| blaOXY                   | 24A | 38.22 | 80.59 | 1.76 |                                          |
| blaPAO                   | 24A |       |       |      | NoAmplification                          |
| blaPER                   | 24A |       |       |      | CurveFitFailed                           |
| blaPSE                   | 24A |       |       |      | NoAmplification                          |
| blaROB                   | 24A |       |       |      | NoAmplification                          |
| blaSFO                   | 24A | 31.39 | 80.23 | 1.77 |                                          |
| blaSHV-01                | 24A | 36.72 | 77.81 | 1.93 |                                          |
| blaSHV-02                | 24A | 42.76 | 86.46 | 1.72 | MultipleMeltPeaks                        |
| blaTEM                   | 24A | 28.22 | 79.51 | 1.92 |                                          |
| blaTLA                   | 24A |       |       |      | NoAmplification                          |
| blaVEB                   | 24A |       |       |      | NoAmplification                          |
| blaVIM                   | 24A |       |       |      | NoAmplification                          |
| blaZ                     | 24A |       |       |      | NoAmplification                          |
| carB                     | 24A |       |       |      | NoAmplification                          |
| catA1                    | 24A |       |       |      | NoAmplification                          |
| catB3                    | 24A |       |       |      | NoAmplification                          |
| catB8                    | 24A | 29.45 | 81.7  | 1.93 | MultipleMeltPeaks                        |

|            |     |       |       |      |                              |
|------------|-----|-------|-------|------|------------------------------|
| ceoA       | 24A | 31.36 | 82.12 | 1.94 | MultipleMeltPeaks            |
| cepA       | 24A |       |       |      | NoAmplification              |
| cfiA       | 24A |       |       |      | NoAmplification              |
| cfr        | 24A |       |       |      | CurveFitFailed               |
| cfxA       | 24A | 21.99 | 77.65 | 2.05 |                              |
| cmeA       | 24A |       |       |      | NoAmplification              |
| cmlA1-01   | 24A | 33.96 | 89.39 | 1.92 |                              |
| cmlA1-02   | 24A | 33.72 | 89.41 | 1.92 |                              |
| cmr        | 24A |       |       |      | NoAmplification              |
| cmx(A)     | 24A | 26.49 | 85.46 | 1.93 |                              |
| cphA-01    | 24A | 31.12 | 88.21 | 1.89 |                              |
| cphA-02    | 24A |       |       |      | CurveFitFailed               |
| dfrA1      | 24A | 37.59 | 78.42 | 2.14 | MultipleMeltPeaks            |
| dfrA12     | 24A |       |       |      | NoAmplification              |
| emrD       | 24A |       |       |      | CurveFitFailed               |
| ereA       | 24A | 34.57 | 82.41 | 1.91 |                              |
| ereB       | 24A | 39.28 | 81.3  | 1.74 | MultipleMeltPeaks            |
| erm(34)    | 24A |       |       |      | NoAmplification              |
| erm(35)    | 24A |       |       |      | NoAmplification              |
| erm(36)    | 24A | 32.87 | 85.54 | 2.09 |                              |
| ermA       | 24A | 29.61 | 75.23 | 2.09 |                              |
| ermA/ermTR | 24A |       |       |      | NoAmplification              |
| ermB       | 24A | 20.86 | 74.96 | 2.06 |                              |
| ermC       | 24A | 28.1  | 75.43 | 2.05 |                              |
| ermF       | 24A |       |       |      | NoAmplification              |
| ermJ/ermD  | 24A |       |       |      | NoAmplification              |
| ermK-01    | 24A |       |       |      | CurveFitFailed               |
| ermK-02    | 24A |       |       |      | NoAmplification              |
| ermT-01    | 24A |       |       |      | NoAmplification              |
| ermT-02    | 24A |       |       |      | NoAmplification              |
| ermX       | 24A | 26.5  | 83.42 | 1.9  |                              |
| ermY       | 24A |       |       |      | NoAmplification              |
| fabK       | 24A | 24.33 | 78.84 | 2.02 |                              |
| floR       | 24A | 31.94 | 78.38 | 1.96 |                              |
| folA       | 24A |       |       |      | NoAmplification              |
| fosB       | 24A |       |       |      | LowEfficiency, CtIsSmall, S: |
| fosX       | 24A |       |       |      | NoAmplification              |
| fox5       | 24A | 26.21 | 86.78 | 1.96 |                              |
| imiR       | 24A |       |       |      | NoAmplification              |
| ImrA-01    | 24A |       |       |      | NoAmplification              |
| intl       | 24A | 33.01 | 84.74 | 1.92 | MultipleMeltPeaks            |
| intl1      | 24A | 22.9  | 87.32 | 1.97 |                              |
| IS613      | 24A | 23.35 | 79.69 | 2.05 |                              |
| lnuA-01    | 24A |       |       |      | CurveFitFailed               |
| lnuB-01    | 24A |       |       |      | LowEfficiency, CtIsSmall, S: |
| lnuB-02    | 24A |       |       |      | NoAmplification              |

|               |     |       |       |      |                              |
|---------------|-----|-------|-------|------|------------------------------|
| lnuC          | 24A |       |       |      | CurveFitFailed               |
| marR-01       | 24A | 43.56 | 79.82 | 1.71 | MultipleMeltPeaks            |
| matA/mel      | 24A | 17.75 | 77.81 | 2.06 |                              |
| mdet1         | 24A |       |       |      | NoAmplification              |
| mdtA          | 24A | 39.72 | 82.03 | 1.66 | MultipleMeltPeaks            |
| mdtE/yhiU     | 24A | 29.56 | 87.37 | 1.9  | MultipleMeltPeaks            |
| mecA          | 24A | 26.87 | 74.89 | 2.06 |                              |
| mefA          | 24A | 16.71 | 80.5  | 1.97 | MultipleMeltPeaks            |
| mepA          | 24A | 32.6  | 85.89 | 1.96 |                              |
| mexA          | 24A |       |       |      | CurveFitFailed               |
| mexD          | 24A | 37.64 | 79.6  | 2.22 | MultipleMeltPeaks            |
| mexE          | 24A | 37.21 | 92.04 | 1.81 |                              |
| mexF          | 24A | 29.76 | 89.56 | 1.83 |                              |
| mphA-01       | 24A | 29.29 | 86.3  | 1.89 | MultipleMeltPeaks            |
| mphA-02       | 24A | 31.03 | 89    | 1.95 |                              |
| mphB          | 24A |       |       |      | NoAmplification              |
| mphC          | 24A |       |       |      | NoAmplification              |
| msrA-01       | 24A |       |       |      | NoAmplification              |
| msrC-01       | 24A |       |       |      | NoAmplification              |
| mtrC-01       | 24A | 36.21 | 84.67 | 1.89 |                              |
| mtrC-02       | 24A |       |       |      | NoAmplification              |
| mtrD-02       | 24A | 29.86 | 81.12 | 2    |                              |
| mtrD-03       | 24A | 37.43 | 82.3  | 1.75 |                              |
| NDM1          | 24A |       |       |      | NoAmplification              |
| nimE          | 24A |       |       |      | NoAmplification              |
| nisB          | 24A |       |       |      | NoAmplification              |
| oleC          | 24A | 31.5  | 88.89 | 1.88 |                              |
| oprD          | 24A | 30.33 | 91.92 | 1.78 |                              |
| oprJ          | 24A | 30.54 | 85.59 | 1.69 | MultipleMeltPeaks            |
| pbp           | 24A |       |       |      | LowEfficiency, CtIsSmall, S: |
| pbp2x         | 24A | 27.36 | 75.16 | 1.99 |                              |
| Pbp5          | 24A |       |       |      | CurveFitFailed               |
| penA          | 24A | 37.81 | 86.34 | 1.68 |                              |
| pikR1         | 24A | 37.04 | 74.13 | 1.86 | MultipleMeltPeaks            |
| pikR2         | 24A | 36.88 | 84.88 | 1.76 | MultipleMeltPeaks            |
| pmrA          | 24A | 21.89 | 79.18 | 2.06 |                              |
| pncA          | 24A | 27.89 | 90.09 | 1.84 |                              |
| putative muli | 24A |       |       |      | CurveFitFailed               |
| qac           | 24A |       |       |      | NoAmplification              |
| qacA          | 24A | 29.41 | 80.85 | 1.99 |                              |
| qacA/qacB     | 24A |       |       |      | NoAmplification              |
| qacEdelta1-0  | 24A |       |       |      | NoAmplification              |
| qacEdelta1-0  | 24A | 36.15 | 75.06 | 1.93 |                              |
| qacH-01       | 24A | 35.34 | 78.63 | 1.9  |                              |
| qacH-02       | 24A | 44.47 | 61.56 | 1.92 | MultipleMeltPeaks            |
| qnrA          | 24A |       |       |      | NoAmplification              |



|              |     |       |       |      |                              |
|--------------|-----|-------|-------|------|------------------------------|
| rarD-02      | 24A |       |       |      | NoAmplification              |
| sat4         | 24A |       |       |      | NoAmplification              |
| sdeB         | 24A |       |       |      | LowEfficiency, CtIsSmall, S: |
| spcN-01      | 24A |       |       |      | NoAmplification              |
| speA         | 24A |       |       |      | NoAmplification              |
| str          | 24A |       |       |      | NoAmplification              |
| strA         | 24A |       |       |      | NoAmplification              |
| strB         | 24A | 29.22 | 83.83 | 1.92 |                              |
| sul1         | 24A | 36.32 | 88.43 | 1.68 | MultipleMeltPeaks            |
| sul2         | 24A | 38.27 | 76.84 | 1.73 | MultipleMeltPeaks            |
| sulA/foIP-01 | 24A | 19.38 | 80.77 | 2    |                              |
| sulA/foIP-03 | 24A | 17.79 | 83.47 | 2    |                              |
| tet(32)      | 24A | 24.05 | 81.44 | 1.98 |                              |
| tet(34)      | 24A | 31.25 | 75.84 | 2.01 |                              |
| tet(35)      | 24A |       |       |      | NoAmplification              |
| tet(36)-A    | 24A |       |       |      | NoAmplification              |
| tet(36)-B    | 24A |       |       |      | NoAmplification              |
| tet(37)      | 24A | 22.55 | 76.74 | 1.97 |                              |
| tetA-01      | 24A | 35.1  | 85.07 | 1.88 |                              |
| tetA-02      | 24A | 37.29 | 91.03 | 1.71 |                              |
| tetB-01      | 24A | 36.98 | 86.23 | 1.8  |                              |
| tetB-02      | 24A |       |       |      | NoAmplification              |
| tetC-01      | 24A |       |       |      | NoAmplification              |
| tetC-02      | 24A |       |       |      | CurveFitFailed               |
| tetD-01      | 24A |       |       |      | NoAmplification              |
| tetD-02      | 24A |       |       |      | NoAmplification              |
| tetE         | 24A |       |       |      | NoAmplification              |
| tetG-01      | 24A | 36.61 | 89.98 | 1.74 |                              |
| tetG-02      | 24A | 36.58 | 84.47 | 1.81 | MultipleMeltPeaks            |
| tetH         | 24A |       |       |      | NoAmplification              |
| tetJ         | 24A |       |       |      | NoAmplification              |
| tetK         | 24A | 29.82 | 72.4  | 2.04 |                              |
| tetL-01      | 24A |       |       |      | NoAmplification              |
| tetL-02      | 24A |       |       |      | CtIsLarge, CurveFitFailed    |
| tetM-01      | 24A | 17.58 | 76.28 | 2    |                              |
| tetM-02      | 24A | 18.11 | 77.83 | 1.99 |                              |
| tetO-01      | 24A | 22.16 | 77.05 | 2    |                              |
| tetPA        | 24A |       |       |      | NoAmplification              |
| tetPB-01     | 24A |       |       |      | NoAmplification              |
| tetPB-02     | 24A | 29.91 | 87.46 | 1.98 |                              |
| tetPB-03     | 24A |       |       |      | CurveFitFailed               |
| tetPB-05     | 24A |       |       |      | CurveFitFailed               |
| tetQ         | 24A | 25.3  | 77.54 | 2.04 |                              |
| tetR-02      | 24A | 31.08 | 80.25 | 1.92 | MultipleMeltPeaks            |
| tetR-03      | 24A |       |       |      | NoAmplification              |
| tetS         | 24A | 37.9  | 88.3  | 1.8  | MultipleMeltPeaks            |

|             |     |       |       |      |                                          |
|-------------|-----|-------|-------|------|------------------------------------------|
| tetT        | 24A |       |       |      | NoAmplification                          |
| tetU-01     | 24A |       |       |      | NoAmplification                          |
| tetV        | 24A |       |       |      | NoAmplification                          |
| tetW-01     | 24A | 22.98 | 82.04 | 1.97 |                                          |
| tetX        | 24A |       |       |      | NoAmplification                          |
| tnpA-01     | 24A |       |       |      | LowEfficiency, CtIsSmall, S <sub>e</sub> |
| tnpA-02     | 24A | 43.14 | 84.33 | 1.61 | MultipleMeltPeaks                        |
| tnpA-03     | 24A | 25.88 | 78    | 2.08 |                                          |
| tnpA-04     | 24A | 29.17 | 82.37 | 1.92 |                                          |
| tnpA-05     | 24A | 29.07 | 80.83 | 1.91 |                                          |
| tnpA-07     | 24A |       |       |      | NoAmplification                          |
| tolC-01     | 24A | 41.86 | 80.03 | 1.78 | MultipleMeltPeaks                        |
| tolC-02     | 24A | 30.66 | 85.47 | 1.94 |                                          |
| tolC-03     | 24A |       |       |      | NoAmplification                          |
| Tp614       | 24A |       |       |      | CtIsLarge, CurveFitFailed                |
| ttgA        | 24A |       |       |      | NoAmplification                          |
| ttgB        | 24A |       |       |      | NoAmplification                          |
| vanA        | 24A |       |       |      | NoAmplification                          |
| vanB-01     | 24A | 32.32 | 87.56 | 1.98 |                                          |
| vanC-01     | 24A | 36.9  | 77.94 | 1.86 | MultipleMeltPeaks                        |
| vanC-02     | 24A |       |       |      | NoAmplification                          |
| vanC-03     | 24A | 29.91 | 84.56 | 1.95 | MultipleMeltPeaks                        |
| vanC1       | 24A |       |       |      | NoAmplification                          |
| vanC2/vanC3 | 24A | 35.58 | 84.6  | 1.86 | MultipleMeltPeaks                        |
| vanG        | 24A |       |       |      | NoAmplification                          |
| vanHB       | 24A | 36.5  | 87.6  | 1.87 |                                          |
| vanHD       | 24A |       |       |      | NoAmplification                          |
| vanRA-01    | 24A |       |       |      | NoAmplification                          |
| vanRA-02    | 24A |       |       |      | NoAmplification                          |
| vanRB       | 24A | 34.19 | 87.08 | 2.07 | MultipleMeltPeaks                        |
| vanRC       | 24A |       |       |      | NoAmplification                          |
| vanRC4      | 24A |       |       |      | NoAmplification                          |
| vanRD       | 24A |       |       |      | NoAmplification                          |
| vanSA       | 24A |       |       |      | NoAmplification                          |
| vanSB       | 24A | 32.02 | 74.52 | 2.08 |                                          |
| vanSC-01    | 24A | 30.62 | 77.97 | 2.04 |                                          |
| vanSC-02    | 24A |       |       |      | NoAmplification                          |
| vanTC-01    | 24A |       |       |      | NoAmplification                          |
| vanTC-02    | 24A | 35.34 | 86.32 | 1.68 |                                          |
| vanTE       | 24A |       |       |      | CurveFitFailed                           |
| vanTG       | 24A |       |       |      | NoAmplification                          |
| vanWB       | 24A |       |       |      | NoAmplification                          |
| vanWG       | 24A |       |       |      | NoAmplification                          |
| vanXA       | 24A |       |       |      | NoAmplification                          |
| vanXB       | 24A |       |       |      | NoAmplification                          |
| vanXD       | 24A | 31.85 | 75.44 | 2.04 |                                          |

|              |     |       |       |      |                              |
|--------------|-----|-------|-------|------|------------------------------|
| vanYB        | 24A |       |       |      | CtIsLarge, CurveFitFailed    |
| vanYD-01     | 24A | 32.08 | 89.19 | 1.84 |                              |
| vanYD-02     | 24A |       |       |      | NoAmplification              |
| vatB-01      | 24A |       |       |      | NoAmplification              |
| vatB-02      | 24A |       |       |      | CurveFitFailed               |
| vatC-01      | 24A |       |       |      | LowEfficiency, CtIsSmall, Ci |
| vatC-02      | 24A |       |       |      | CurveFitFailed               |
| vatE-01      | 24A | 29.25 | 76.37 | 2.09 |                              |
| vatE-02      | 24A |       |       |      | NoAmplification              |
| vgaA-01      | 24A |       |       |      | NoAmplification              |
| vgaA-02      | 24A |       |       |      | NoAmplification              |
| vgb-01       | 24A |       |       |      | CurveFitFailed               |
| vgbB-01      | 24A |       |       |      | NoAmplification              |
| vgbB-02      | 24A |       |       |      | NoAmplification              |
| yceE/mdtG-0  | 24A |       |       |      | CurveFitFailed               |
| yceE/mdtG-0  | 24A |       |       |      | NoAmplification              |
| yceL/mdtH-0  | 24A | 31.01 | 76.19 | 1.94 |                              |
| yceL/mdtH-0  | 24A |       |       |      | NoAmplification              |
| yceL/mdtH-0  | 24A |       |       |      | CurveFitFailed               |
| yidY/mdtL-01 | 24A | 33.03 | 90.75 | 1.72 |                              |
| yidY/mdtL-02 | 24A |       |       |      | CurveFitFailed               |































| Assay           | Sample | Ct | Tm    | Efficiency | flag                         |
|-----------------|--------|----|-------|------------|------------------------------|
| 16S rRNA        | 24B    |    | 19.61 | 82.05      | 2.01                         |
| aac             | 24B    |    | 32.43 | 84.85      | 1.48 MultipleMeltPeaks       |
| aac(6')-Ib(akz) | 24B    |    |       |            | LowEfficiency, CtIsSmall, Ci |
| aac(6')-Ib(akz) | 24B    |    | 30.64 | 87.02      | 1.95 MultipleMeltPeaks       |
| aac(6')-Ib(akz) | 24B    |    | 36.36 | 79.03      | 1.85                         |
| aac(6')-II      | 24B    |    | 42.82 | 80.82      | 1.71 MultipleMeltPeaks       |
| aac(6')I1       | 24B    |    | 44.98 | 64.62      | 1.58 MultipleMeltPeaks       |
| aacA/aphD       | 24B    |    |       |            | NoAmplification              |
| aacC            | 24B    |    | 32.67 | 88.02      | 1.91 MultipleMeltPeaks       |
| aacC1           | 24B    |    |       |            | NoAmplification              |
| aacC2           | 24B    |    |       |            | NoAmplification              |
| aacC4           | 24B    |    |       |            | NoAmplification              |
| aadA-01         | 24B    |    | 37.6  | 79.27      | 1.87                         |
| aadA-02         | 24B    |    | 34.36 | 80.38      | 1.97                         |
| aadA-1-01       | 24B    |    | 33.67 | 83.4       | 1.92                         |
| aadA-1-02       | 24B    |    |       |            | NoAmplification              |
| aadA1           | 24B    |    | 41.55 | 83.33      | 1.75 MultipleMeltPeaks       |
| aadA2-01        | 24B    |    |       |            | NoAmplification              |
| aadA2-02        | 24B    |    | 33.97 | 75.16      | 2.02                         |
| aadA2-03        | 24B    |    |       |            | NoAmplification              |
| aadA5-01        | 24B    |    | 38.69 | 84.69      | 1.76 MultipleMeltPeaks       |
| aadA5-02        | 24B    |    | 31.86 | 88.84      | 1.9                          |
| aadA9-01        | 24B    |    | 39.59 | 81.9       | 1.85 MultipleMeltPeaks       |
| aadA9-02        | 24B    |    |       |            | NoAmplification              |
| aadD            | 24B    |    |       |            | NoAmplification              |
| aadE            | 24B    |    |       |            | CurveFitFailed               |
| acrA-01         | 24B    |    | 31.29 | 88.79      | 1.91                         |
| acrA-02         | 24B    |    |       |            | CurveFitFailed               |
| acrA-03         | 24B    |    |       |            | LowEfficiency, CtIsSmall, Ci |
| acrA-04         | 24B    |    | 30.99 | 80.48      | 1.98                         |
| acrA-05         | 24B    |    | 33.48 | 88.76      | 1.92 MultipleMeltPeaks       |
| acrB-01         | 24B    |    | 33.82 | 85.51      | 1.86                         |
| acrF            | 24B    |    | 36.3  | 78.2       | 1.97                         |
| acrR-01         | 24B    |    | 30.35 | 80.06      | 1.92                         |
| acrR-02         | 24B    |    | 36.08 | 85.18      | 1.85 MultipleMeltPeaks       |
| Actin           | 24B    |    | 22.73 | 87.06      | 1.91                         |
| adeA            | 24B    |    |       |            | NoAmplification              |
| ampC-01         | 24B    |    |       |            | CtIsLarge, CurveFitFailed    |
| ampC-02         | 24B    |    |       |            | NoAmplification              |
| ampC-04         | 24B    |    | 38.34 | 76.54      | 1.89                         |
| ampC-05         | 24B    |    |       |            | NoAmplification              |
| ampC-06         | 24B    |    |       |            | NoAmplification              |
| ampC-07         | 24B    |    |       |            | CtIsLarge, CurveFitFailed    |
| ampC-09         | 24B    |    |       |            | NoAmplification              |
| ampC/blaDH      | 24B    |    | 32.35 | 84.65      | 1.95                         |

|                          |     |       |       |      |                              |
|--------------------------|-----|-------|-------|------|------------------------------|
| aph                      | 24B |       |       |      | LowEfficiency, CtIsSmall, Ci |
| aph(2')-Id-01            | 24B |       |       |      | CurveFitFailed               |
| aph(2')-Id-02            | 24B |       |       |      | NoAmplification              |
| aph6ia                   | 24B |       |       |      | NoAmplification              |
| aphA1(aka k <sub>e</sub> | 24B | 28.26 | 76.39 | 2.02 |                              |
| bacA-01                  | 24B |       |       |      | NoAmplification              |
| bacA-02                  | 24B |       |       |      | LowEfficiency, CtIsSmall, Ci |
| BETA-globin              | 24B | 23.04 | 84.05 | 1.98 |                              |
| bla-ACC-1                | 24B |       |       |      | NoAmplification              |
| bla-L1                   | 24B | 28.71 | 85.02 | 1.95 |                              |
| bla1                     | 24B |       |       |      | LowEfficiency, CtIsSmall, Ci |
| blaCMY                   | 24B |       |       |      | CurveFitFailed               |
| blaCMY2-01               | 24B |       |       |      | NoAmplification              |
| blaCMY2-02               | 24B | 29.3  | 85.57 | 1.96 |                              |
| blaCTX-M-01              | 24B | 37.63 | 86.39 | 1.86 | MultipleMeltPeaks            |
| blaCTX-M-02              | 24B |       |       |      | CurveFitFailed               |
| blaCTX-M-03              | 24B |       |       |      | LowEfficiency, CtIsSmall, Ci |
| blaCTX-M-04              | 24B |       |       |      | NoAmplification              |
| blaCTX-M-05              | 24B |       |       |      | NoAmplification              |
| blaCTX-M-06              | 24B |       |       |      | NoAmplification              |
| blaGES                   | 24B |       |       |      | NoAmplification              |
| blaIMP-01                | 24B |       |       |      | NoAmplification              |
| blaIMP-02                | 24B | 33.61 | 83.8  | 1.95 |                              |
| blaMOX/blaC              | 24B |       |       |      | NoAmplification              |
| blaOCH                   | 24B |       |       |      | NoAmplification              |
| blaOKP                   | 24B |       |       |      | NoAmplification              |
| blaOXA1/blaC             | 24B |       |       |      | CurveFitFailed               |
| blaOXA10-01              | 24B |       |       |      | NoAmplification              |
| blaOXA10-02              | 24B |       |       |      | CurveFitFailed               |
| blaOXY                   | 24B | 39.09 | 89.27 | 1.65 | MultipleMeltPeaks            |
| blaPAO                   | 24B |       |       |      | NoAmplification              |
| blaPER                   | 24B |       |       |      | LowEfficiency, CtIsSmall, Ci |
| blaPSE                   | 24B |       |       |      | NoAmplification              |
| blaROB                   | 24B |       |       |      | NoAmplification              |
| blaSFO                   | 24B |       |       |      | CurveFitFailed               |
| blaSHV-01                | 24B |       |       |      | NoAmplification              |
| blaSHV-02                | 24B | 36.75 | 83.82 | 1.84 |                              |
| blaTEM                   | 24B | 26.94 | 79.1  | 1.96 |                              |
| blaTLA                   | 24B |       |       |      | LowEfficiency, CtIsSmall, Ci |
| blaVEB                   | 24B |       |       |      | NoAmplification              |
| blaVIM                   | 24B |       |       |      | NoAmplification              |
| blaZ                     | 24B |       |       |      | NoAmplification              |
| carB                     | 24B | 38.66 | 82.59 | 1.78 | MultipleMeltPeaks            |
| catA1                    | 24B |       |       |      | NoAmplification              |
| catB3                    | 24B | 35.16 | 87.63 | 1.83 | MultipleMeltPeaks            |
| catB8                    | 24B | 30.23 | 81.82 | 2.01 |                              |

|            |     |       |       |      |                              |
|------------|-----|-------|-------|------|------------------------------|
| ceoA       | 24B | 30.11 | 82.34 | 1.93 |                              |
| cepA       | 24B |       |       |      | NoAmplification              |
| cfiA       | 24B | 34.29 | 83.95 | 1.84 |                              |
| cfr        | 24B |       |       |      | CurveFitFailed               |
| cfxA       | 24B | 26.87 | 77.52 | 2.05 |                              |
| cmeA       | 24B |       |       |      | LowEfficiency, CtIsSmall, S: |
| cmlA1-01   | 24B |       |       |      | NoAmplification              |
| cmlA1-02   | 24B | 43.34 | 85.44 | 1.76 | MultipleMeltPeaks            |
| cmr        | 24B |       |       |      | CurveFitFailed               |
| cmx(A)     | 24B | 31.33 | 86.6  | 1.88 | MultipleMeltPeaks            |
| cphA-01    | 24B | 28.6  | 86.36 | 1.92 |                              |
| cphA-02    | 24B |       |       |      | CurveFitFailed               |
| dfrA1      | 24B |       |       |      | NoAmplification              |
| dfrA12     | 24B |       |       |      | NoAmplification              |
| emrD       | 24B | 37.51 | 90.16 | 1.72 |                              |
| ereA       | 24B | 34.55 | 82.42 | 1.97 |                              |
| ereB       | 24B |       |       |      | CurveFitFailed               |
| erm(34)    | 24B |       |       |      | NoAmplification              |
| erm(35)    | 24B |       |       |      | LowEfficiency, CtIsSmall, Ci |
| erm(36)    | 24B | 35.87 | 88.64 | 1.87 |                              |
| ermA       | 24B |       |       |      | LowEfficiency, CtIsSmall, Ci |
| ermA/ermTR | 24B |       |       |      | NoAmplification              |
| ermB       | 24B | 26.17 | 74.89 | 2.11 |                              |
| ermC       | 24B |       |       |      | LowEfficiency, CtIsSmall, Ci |
| ermF       | 24B | 26.35 | 74.65 | 2    |                              |
| ermJ/ermD  | 24B |       |       |      | NoAmplification              |
| ermK-01    | 24B |       |       |      | LowEfficiency, CtIsSmall, Ci |
| ermK-02    | 24B |       |       |      | NoAmplification              |
| ermT-01    | 24B |       |       |      | LowEfficiency, CtIsSmall, Ci |
| ermT-02    | 24B |       |       |      | NoAmplification              |
| ermX       | 24B | 40.04 | 83.64 | 1.69 | MultipleMeltPeaks            |
| ermY       | 24B |       |       |      | NoAmplification              |
| fabK       | 24B | 27.02 | 78.5  | 1.95 |                              |
| floR       | 24B |       |       |      | NoAmplification              |
| folA       | 24B |       |       |      | NoAmplification              |
| fosB       | 24B |       |       |      | LowEfficiency, CtIsSmall, S: |
| fosX       | 24B |       |       |      | NoAmplification              |
| fox5       | 24B | 29.16 | 86.35 | 1.92 |                              |
| imiR       | 24B |       |       |      | NoAmplification              |
| ImrA-01    | 24B |       |       |      | NoAmplification              |
| intl       | 24B | 30.98 | 84.74 | 1.94 | MultipleMeltPeaks            |
| intl1      | 24B | 22.17 | 87.51 | 1.98 |                              |
| IS613      | 24B |       |       |      | CurveFitFailed               |
| lnuA-01    | 24B |       |       |      | LowEfficiency, CtIsSmall, S: |
| lnuB-01    | 24B |       |       |      | LowEfficiency, CtIsSmall, S: |
| lnuB-02    | 24B |       |       |      | NoAmplification              |

|               |     |       |       |      |                              |
|---------------|-----|-------|-------|------|------------------------------|
| lnuC          | 24B |       |       |      | LowEfficiency, CtIsSmall, Ci |
| marR-01       | 24B | 38.35 | 85.27 | 1.77 |                              |
| matA/mel      | 24B | 22.02 | 77.65 | 2.03 |                              |
| mdet1         | 24B |       |       |      | NoAmplification              |
| mdtA          | 24B |       |       |      | CurveFitFailed               |
| mdtE/yhiU     | 24B | 44.18 | 61.82 | 2.34 | MultipleMeltPeaks            |
| mecA          | 24B |       |       |      | CurveFitFailed               |
| mefA          | 24B | 21.21 | 80.48 | 1.96 |                              |
| mepA          | 24B | 36.08 | 78.65 | 1.85 |                              |
| mexA          | 24B |       |       |      | LowEfficiency, CtIsSmall, Ci |
| mexD          | 24B | 33.92 | 79.99 | 2.03 |                              |
| mexE          | 24B | 29.17 | 82.1  | 1.95 |                              |
| mexF          | 24B | 30.14 | 89.3  | 2.07 | MultipleMeltPeaks            |
| mphA-01       | 24B | 32.3  | 80.59 | 1.89 | MultipleMeltPeaks            |
| mphA-02       | 24B | 32.09 | 86.77 | 1.6  |                              |
| mphB          | 24B |       |       |      | BadR2, LowEfficiency, CtIsS  |
| mphC          | 24B |       |       |      | LowEfficiency, CtIsSmall, Ci |
| msrA-01       | 24B | 29.82 | 76.49 | 2.02 |                              |
| msrC-01       | 24B |       |       |      | NoAmplification              |
| mtrC-01       | 24B |       |       |      | NoAmplification              |
| mtrC-02       | 24B |       |       |      | NoAmplification              |
| mtrD-02       | 24B | 30.88 | 80.91 | 1.9  |                              |
| mtrD-03       | 24B |       |       |      | CtIsLarge, CurveFitFailed    |
| NDM1          | 24B |       |       |      | LowEfficiency, CtIsSmall, Ci |
| nimE          | 24B |       |       |      | NoAmplification              |
| nisB          | 24B |       |       |      | NoAmplification              |
| oleC          | 24B |       |       |      | CtIsLarge, CurveFitFailed    |
| oprD          | 24B | 30.56 | 81.36 | 1.99 | MultipleMeltPeaks            |
| oprJ          | 24B | 32.43 | 83.3  | 1.89 |                              |
| pbp           | 24B |       |       |      | CurveFitFailed               |
| pbp2x         | 24B |       |       |      | NoAmplification              |
| Pbp5          | 24B |       |       |      | CurveFitFailed               |
| penA          | 24B | 39.01 | 85.79 | 1.81 | MultipleMeltPeaks            |
| pikR1         | 24B | 35.28 | 91.26 | 1.8  | MultipleMeltPeaks            |
| pikR2         | 24B | 37.59 | 84.46 | 1.78 |                              |
| pmrA          | 24B | 23.08 | 79.85 | 2.05 |                              |
| pncA          | 24B | 27.67 | 84.7  | 1.9  | MultipleMeltPeaks            |
| putative mult | 24B |       |       |      | CtIsLarge, CurveFitFailed    |
| qac           | 24B |       |       |      | LowEfficiency, CtIsSmall, S: |
| qacA          | 24B |       |       |      | NoAmplification              |
| qacA/qacB     | 24B |       |       |      | NoAmplification              |
| qacEdelta1-0  | 24B |       |       |      | NoAmplification              |
| qacEdelta1-0  | 24B | 37.16 | 77.68 | 1.84 |                              |
| qacH-01       | 24B | 39.06 | 85.82 | 1.82 |                              |
| qacH-02       | 24B | 37.4  | 83.59 | 1.67 |                              |
| qnrA          | 24B | 44.58 | 73.19 | 2.03 | MultipleMeltPeaks            |

|              |     |       |       |                              |
|--------------|-----|-------|-------|------------------------------|
| rarD-02      | 24B |       |       | NoAmplification              |
| sat4         | 24B |       |       | NoAmplification              |
| sdeB         | 24B |       |       | CurveFitFailed               |
| spcN-01      | 24B |       |       | NoAmplification              |
| speA         | 24B |       |       | NoAmplification              |
| str          | 24B |       |       | NoAmplification              |
| strA         | 24B |       |       | CurveFitFailed               |
| strB         | 24B | 29.17 | 83.87 | 1.91                         |
| sul1         | 24B |       |       | NoAmplification              |
| sul2         | 24B | 27.23 | 85.88 | 2                            |
| sulA/foIP-01 | 24B | 21.75 | 81.09 | 1.97                         |
| sulA/foIP-03 | 24B | 23.54 | 83.47 | 1.97                         |
| tet(32)      | 24B |       |       | NoAmplification              |
| tet(34)      | 24B | 32.57 | 75.63 | 2.01                         |
| tet(35)      | 24B |       |       | NoAmplification              |
| tet(36)-A    | 24B |       |       | LowEfficiency, CtIsSmall, Ci |
| tet(36)-B    | 24B |       |       | LowEfficiency, CtIsSmall, Ci |
| tet(37)      | 24B | 37.33 | 84.9  | 1.84                         |
| tetA-01      | 24B | 32.68 | 85.09 | 1.99                         |
| tetA-02      | 24B |       |       | CurveFitFailed               |
| tetB-01      | 24B | 34.62 | 86.33 | 1.9                          |
| tetB-02      | 24B | 30.27 | 83.56 | 1.95                         |
| tetC-01      | 24B |       |       | NoAmplification              |
| tetC-02      | 24B |       |       | CurveFitFailed               |
| tetD-01      | 24B |       |       | LowEfficiency, CtIsSmall, Ci |
| tetD-02      | 24B | 29.41 | 82.22 | 1.99                         |
| tetE         | 24B |       |       | NoAmplification              |
| tetG-01      | 24B | 36.33 | 83.75 | 1.73                         |
| tetG-02      | 24B |       |       | NoAmplification              |
| tetH         | 24B |       |       | NoAmplification              |
| tetJ         | 24B |       |       | NoAmplification              |
| tetK         | 24B |       |       | CurveFitFailed               |
| tetL-01      | 24B |       |       | NoAmplification              |
| tetL-02      | 24B | 35.29 | 85.21 | 1.7                          |
| tetM-01      | 24B | 20.46 | 76.15 | 2                            |
| tetM-02      | 24B | 21.29 | 77.82 | 2                            |
| tetO-01      | 24B |       |       | NoAmplification              |
| tetPA        | 24B |       |       | NoAmplification              |
| tetPB-01     | 24B |       |       | NoAmplification              |
| tetPB-02     | 24B | 30.85 | 84.84 | 2.04                         |
| tetPB-03     | 24B |       |       | NoAmplification              |
| tetPB-05     | 24B |       |       | CurveFitFailed               |
| tetQ         | 24B |       |       | NoAmplification              |
| tetR-02      | 24B | 31.83 | 85.03 | 1.95                         |
| tetR-03      | 24B |       |       | NoAmplification              |
| tetS         | 24B |       |       | CurveFitFailed               |

|             |     |       |       |      |                              |
|-------------|-----|-------|-------|------|------------------------------|
| tetT        | 24B | 44.68 | 77.46 | 1.99 | BadR2, MultipleMeltPeaks     |
| tetU-01     | 24B |       |       |      | NoAmplification              |
| tetV        | 24B |       |       |      | NoAmplification              |
| tetW-01     | 24B |       |       |      | CurveFitFailed               |
| tetX        | 24B |       |       |      | NoAmplification              |
| tnpA-01     | 24B | 25.93 | 85.53 | 1.99 |                              |
| tnpA-02     | 24B | 36.76 | 84.49 | 1.66 |                              |
| tnpA-03     | 24B | 36.04 | 74.25 | 2.07 |                              |
| tnpA-04     | 24B |       |       |      | NoAmplification              |
| tnpA-05     | 24B | 27.94 | 80.87 | 1.92 |                              |
| tnpA-07     | 24B |       |       |      | NoAmplification              |
| tolC-01     | 24B |       |       |      | LowEfficiency, CtIsSmall, Ci |
| tolC-02     | 24B | 34.38 | 83.95 | 1.9  |                              |
| tolC-03     | 24B | 33.91 | 85.55 | 1.97 | MultipleMeltPeaks            |
| Tp614       | 24B | 30.76 | 80.95 | 1.97 |                              |
| ttgA        | 24B |       |       |      | NoAmplification              |
| ttgB        | 24B |       |       |      | NoAmplification              |
| vanA        | 24B |       |       |      | NoAmplification              |
| vanB-01     | 24B | 32.96 | 84.92 | 2.02 | MultipleMeltPeaks            |
| vanC-01     | 24B |       |       |      | LowEfficiency, CtIsSmall, Ci |
| vanC-02     | 24B |       |       |      | LowEfficiency, CtIsSmall, Ci |
| vanC-03     | 24B | 27.9  | 85.56 | 1.94 |                              |
| vanC1       | 24B |       |       |      | NoAmplification              |
| vanC2/vanC3 | 24B | 35.95 | 83.23 | 1.84 |                              |
| vanG        | 24B |       |       |      | CurveFitFailed               |
| vanHB       | 24B |       |       |      | NoAmplification              |
| vanHD       | 24B |       |       |      | CurveFitFailed               |
| vanRA-01    | 24B |       |       |      | NoAmplification              |
| vanRA-02    | 24B |       |       |      | NoAmplification              |
| vanRB       | 24B | 36.74 | 81.68 | 1.82 |                              |
| vanRC       | 24B |       |       |      | NoAmplification              |
| vanRC4      | 24B |       |       |      | NoAmplification              |
| vanRD       | 24B |       |       |      | NoAmplification              |
| vanSA       | 24B |       |       |      | BadR2, LowEfficiency, CtIsS  |
| vanSB       | 24B | 29.5  | 74.73 | 2.05 |                              |
| vanSC-01    | 24B | 35.01 | 84.09 | 1.92 |                              |
| vanSC-02    | 24B |       |       |      | NoAmplification              |
| vanTC-01    | 24B |       |       |      | LowEfficiency, CtIsSmall, Ci |
| vanTC-02    | 24B |       |       |      | NoAmplification              |
| vanTE       | 24B |       |       |      | NoAmplification              |
| vanTG       | 24B |       |       |      | NoAmplification              |
| vanWB       | 24B |       |       |      | CurveFitFailed               |
| vanWG       | 24B |       |       |      | CurveFitFailed               |
| vanXA       | 24B |       |       |      | CurveFitFailed               |
| vanXB       | 24B |       |       |      | NoAmplification              |
| vanXD       | 24B | 30.94 | 75.6  | 2.05 |                              |

|              |     |       |       |      |                              |
|--------------|-----|-------|-------|------|------------------------------|
| vanYB        | 24B | 40.34 | 75.87 | 1.81 | MultipleMeltPeaks            |
| vanYD-01     | 24B | 32.54 | 82.71 | 1.82 |                              |
| vanYD-02     | 24B |       |       |      | NoAmplification              |
| vatB-01      | 24B |       |       |      | NoAmplification              |
| vatB-02      | 24B |       |       |      | CtIsLarge, CurveFitFailed    |
| vatC-01      | 24B |       |       |      | LowEfficiency, CtIsSmall, Ci |
| vatC-02      | 24B | 36.44 | 85.55 | 1.8  |                              |
| vatE-01      | 24B | 31.31 | 75.93 | 2    |                              |
| vatE-02      | 24B |       |       |      | NoAmplification              |
| vgaA-01      | 24B |       |       |      | LowEfficiency, CtIsSmall, Ci |
| vgaA-02      | 24B |       |       |      | CurveFitFailed               |
| vgb-01       | 24B | 33.44 | 76.05 | 1.93 |                              |
| vgbB-01      | 24B |       |       |      | LowEfficiency, CtIsSmall, Ci |
| vgbB-02      | 24B |       |       |      | NoAmplification              |
| yceE/mdtG-0  | 24B | 33.6  | 77.43 | 2.08 |                              |
| yceE/mdtG-0  | 24B |       |       |      | NoAmplification              |
| yceL/mdtH-0  | 24B | 36.69 | 84.27 | 1.71 |                              |
| yceL/mdtH-0  | 24B |       |       |      | NoAmplification              |
| yceL/mdtH-0  | 24B | 39.86 | 77.59 | 1.8  |                              |
| yidY/mdtL-01 | 24B | 33.78 | 86.02 | 1.95 | MultipleMeltPeaks            |
| yidY/mdtL-02 | 24B | 28.64 | 79.88 | 1.95 |                              |































| Assay          | Sample | Ct | Tm    | Efficiency | flag                         |
|----------------|--------|----|-------|------------|------------------------------|
| 16S rRNA       | 24C    |    | 22.74 | 82.11      | 1.94                         |
| aac            | 24C    |    | 29.94 | 83.23      | 1.57 MultipleMeltPeaks       |
| aac(6')-Ib(akε | 24C    |    |       |            | CurveFitFailed               |
| aac(6')-Ib(akε | 24C    |    | 31.42 | 87.2       | 1.97 MultipleMeltPeaks       |
| aac(6')-Ib(akε | 24C    |    | 31.96 | 81.27      | 2.01                         |
| aac(6')-II     | 24C    |    | 36.59 | 80.99      | 1.64 MultipleMeltPeaks       |
| aac(6')I1      | 24C    |    |       |            | NoAmplification              |
| aacA/aphD      | 24C    |    |       |            | LowEfficiency, CtIsSmall, Ci |
| aacC           | 24C    |    | 32.89 | 84.08      | 1.9 MultipleMeltPeaks        |
| aacC1          | 24C    |    |       |            | CurveFitFailed               |
| aacC2          | 24C    |    |       |            | NoAmplification              |
| aacC4          | 24C    |    | 35.92 | 78.93      | 1.85 MultipleMeltPeaks       |
| aadA-01        | 24C    |    |       |            | NoAmplification              |
| aadA-02        | 24C    |    |       |            | LowEfficiency, CtIsSmall, Ci |
| aadA-1-01      | 24C    |    | 37.17 | 81.32      | 1.87                         |
| aadA-1-02      | 24C    |    |       |            | CurveFitFailed               |
| aadA1          | 24C    |    | 35.37 | 84.78      | 1.83                         |
| aadA2-01       | 24C    |    |       |            | CurveFitFailed               |
| aadA2-02       | 24C    |    | 32.46 | 75.27      | 2.01                         |
| aadA2-03       | 24C    |    |       |            | NoAmplification              |
| aadA5-01       | 24C    |    | 38.4  | 78.14      | 1.78 MultipleMeltPeaks       |
| aadA5-02       | 24C    |    | 37.96 | 83.48      | 1.85                         |
| aadA9-01       | 24C    |    |       |            | CurveFitFailed               |
| aadA9-02       | 24C    |    |       |            | NoAmplification              |
| aadD           | 24C    |    |       |            | NoAmplification              |
| aadE           | 24C    |    |       |            | NoAmplification              |
| acrA-01        | 24C    |    | 32.96 | 88.69      | 1.92                         |
| acrA-02        | 24C    |    |       |            | CtIsLarge, CurveFitFailed    |
| acrA-03        | 24C    |    |       |            | LowEfficiency, CtIsSmall, Sε |
| acrA-04        | 24C    |    | 31.32 | 80.47      | 1.97                         |
| acrA-05        | 24C    |    | 30.38 | 88.62      | 1.92                         |
| acrB-01        | 24C    |    | 38.67 | 75.73      | 1.91                         |
| acrF           | 24C    |    | 29.72 | 81.82      | 1.96                         |
| acrR-01        | 24C    |    | 37.97 | 85.09      | 1.71                         |
| acrR-02        | 24C    |    | 36.62 | 83.16      | 1.68                         |
| Actin          | 24C    |    | 22.13 | 87.03      | 1.93                         |
| adeA           | 24C    |    | 39.5  | 77.22      | 1.75 MultipleMeltPeaks       |
| ampC-01        | 24C    |    | 34.77 | 85.06      | 1.94                         |
| ampC-02        | 24C    |    |       |            | NoAmplification              |
| ampC-04        | 24C    |    | 33.86 | 78.12      | 1.96                         |
| ampC-05        | 24C    |    |       |            | NoAmplification              |
| ampC-06        | 24C    |    |       |            | CurveFitFailed               |
| ampC-07        | 24C    |    | 33.76 | 88.23      | 1.85                         |
| ampC-09        | 24C    |    | 35.11 | 83.83      | 1.87 MultipleMeltPeaks       |
| ampC/blaDH     | 24C    |    | 28.55 | 85.43      | 2.02                         |

|                            |     |       |       |      |                              |
|----------------------------|-----|-------|-------|------|------------------------------|
| aph                        | 24C |       |       |      | LowEfficiency, CtIsSmall, S: |
| aph(2')-Id-01              | 24C |       |       |      | NoAmplification              |
| aph(2')-Id-02              | 24C |       |       |      | LowEfficiency, CtIsSmall, S: |
| aph6ia                     | 24C |       |       |      | LowEfficiency, CtIsSmall, C: |
| aphA1(aka k <sub>e</sub> ) | 24C | 26.7  | 76.28 | 2.07 |                              |
| bacA-01                    | 24C |       |       |      | CtIsLarge, CurveFitFailed    |
| bacA-02                    | 24C |       |       |      | LowEfficiency, CtIsSmall, S: |
| BETA-globin                | 24C | 22.46 | 84.03 | 1.97 |                              |
| bla-ACC-1                  | 24C | 39.47 | 85.12 | 1.7  | MultipleMeltPeaks            |
| bla-L1                     | 24C | 29.55 | 85.21 | 1.99 |                              |
| bla1                       | 24C |       |       |      | LowEfficiency, CtIsSmall, S: |
| blaCMY                     | 24C |       |       |      | CurveFitFailed               |
| blaCMY2-01                 | 24C | 32.75 | 84.04 | 1.93 | MultipleMeltPeaks            |
| blaCMY2-02                 | 24C | 29.21 | 82.66 | 1.99 |                              |
| blaCTX-M-01                | 24C |       |       |      | NoAmplification              |
| blaCTX-M-02                | 24C |       |       |      | CtIsLarge, CurveFitFailed    |
| blaCTX-M-03                | 24C |       |       |      | LowEfficiency, CtIsSmall, S: |
| blaCTX-M-04                | 24C | 32.71 | 83.07 | 1.92 |                              |
| blaCTX-M-05                | 24C | 35.86 | 75    | 1.83 |                              |
| blaCTX-M-06                | 24C |       |       |      | NoAmplification              |
| blaGES                     | 24C |       |       |      | NoAmplification              |
| blaIMP-01                  | 24C |       |       |      | CurveFitFailed               |
| blaIMP-02                  | 24C | 36.05 | 78.78 | 1.86 |                              |
| blaMOX/blaC                | 24C | 38.31 | 81.26 | 1.84 |                              |
| blaOCH                     | 24C |       |       |      | NoAmplification              |
| blaOKP                     | 24C |       |       |      | NoAmplification              |
| blaOXA1/blaC               | 24C |       |       |      | LowEfficiency, CtIsSmall, S: |
| blaOXA10-01                | 24C |       |       |      | NoAmplification              |
| blaOXA10-02                | 24C |       |       |      | LowEfficiency, CtIsSmall, C: |
| blaOXY                     | 24C |       |       |      | CurveFitFailed               |
| blaPAO                     | 24C |       |       |      | NoAmplification              |
| blaPER                     | 24C |       |       |      | CurveFitFailed               |
| blaPSE                     | 24C |       |       |      | NoAmplification              |
| blaROB                     | 24C |       |       |      | NoAmplification              |
| blaSFO                     | 24C | 33.75 | 88.58 | 1.9  |                              |
| blaSHV-01                  | 24C | 38.05 | 78.64 | 1.86 | MultipleMeltPeaks            |
| blaSHV-02                  | 24C | 36.89 | 79.57 | 1.85 |                              |
| blaTEM                     | 24C | 27.23 | 79.33 | 1.95 |                              |
| blaTLA                     | 24C |       |       |      | LowEfficiency, CtIsSmall, S: |
| blaVEB                     | 24C |       |       |      | NoAmplification              |
| blaVIM                     | 24C |       |       |      | NoAmplification              |
| blaZ                       | 24C |       |       |      | NoAmplification              |
| carB                       | 24C | 37.58 | 82.36 | 1.9  |                              |
| catA1                      | 24C |       |       |      | NoAmplification              |
| catB3                      | 24C | 31.62 | 87.5  | 1.95 |                              |
| catB8                      | 24C | 28.92 | 83.69 | 1.98 |                              |

|            |     |       |       |      |                              |
|------------|-----|-------|-------|------|------------------------------|
| ceoA       | 24C | 28.72 | 82.14 | 1.93 | MultipleMeltPeaks            |
| cepA       | 24C |       |       |      | NoAmplification              |
| cfiA       | 24C | 32.51 | 85.92 | 1.96 |                              |
| cfr        | 24C | 37.98 | 76.02 | 1.87 |                              |
| cfxA       | 24C |       |       |      | CurveFitFailed               |
| cmeA       | 24C | 37.29 | 82.14 | 1.83 |                              |
| cmlA1-01   | 24C |       |       |      | CurveFitFailed               |
| cmlA1-02   | 24C | 30.42 | 87.97 | 1.98 | MultipleMeltPeaks            |
| cmr        | 24C | 36.78 | 78.56 | 1.8  |                              |
| cmx(A)     | 24C | 29.39 | 84.38 | 1.9  | MultipleMeltPeaks            |
| cphA-01    | 24C | 32.97 | 87.95 | 1.95 | MultipleMeltPeaks            |
| cphA-02    | 24C | 33.73 | 82.37 | 1.93 |                              |
| dfrA1      | 24C | 34.7  | 79.6  | 1.92 |                              |
| dfrA12     | 24C |       |       |      | CurveFitFailed               |
| emrD       | 24C |       |       |      | CtIsLarge, CurveFitFailed    |
| ereA       | 24C |       |       |      | CurveFitFailed               |
| ereB       | 24C | 33.45 | 85.42 | 1.98 |                              |
| erm(34)    | 24C |       |       |      | NoAmplification              |
| erm(35)    | 24C |       |       |      | LowEfficiency, CtIsSmall, Ci |
| erm(36)    | 24C | 43.5  | 61.86 | 1.8  | MultipleMeltPeaks            |
| ermA       | 24C |       |       |      | LowEfficiency, CtIsSmall, S: |
| ermA/ermTR | 24C |       |       |      | NoAmplification              |
| ermB       | 24C |       |       |      | CurveFitFailed               |
| ermC       | 24C |       |       |      | LowEfficiency, CtIsSmall, Ci |
| ermF       | 24C |       |       |      | LowEfficiency, CtIsSmall, S: |
| ermJ/ermD  | 24C |       |       |      | NoAmplification              |
| ermK-01    | 24C | 33.51 | 74.47 | 1.99 | MultipleMeltPeaks            |
| ermK-02    | 24C |       |       |      | NoAmplification              |
| ermT-01    | 24C |       |       |      | CurveFitFailed               |
| ermT-02    | 24C |       |       |      | BadR2, LowEfficiency, CtIsS  |
| ermX       | 24C | 36.38 | 84.01 | 1.74 | MultipleMeltPeaks            |
| ermY       | 24C |       |       |      | LowEfficiency, CtIsSmall, Ci |
| fabK       | 24C | 24.4  | 77.17 | 1.92 |                              |
| floR       | 24C |       |       |      | NoAmplification              |
| folA       | 24C |       |       |      | NoAmplification              |
| fosB       | 24C |       |       |      | LowEfficiency, CtIsSmall, S: |
| fosX       | 24C |       |       |      | LowEfficiency, CtIsSmall, Ci |
| fox5       | 24C | 28.9  | 86.48 | 1.96 |                              |
| imiR       | 24C |       |       |      | CurveFitFailed               |
| ImrA-01    | 24C | 44.52 | 79.52 | 1.98 | MultipleMeltPeaks            |
| intl       | 24C | 29.35 | 84.91 | 1.97 |                              |
| intl1      | 24C | 20.84 | 86.93 | 2.01 |                              |
| IS613      | 24C | 28.54 | 81.85 | 1.64 |                              |
| lnuA-01    | 24C |       |       |      | LowEfficiency, CtIsSmall, Ci |
| lnuB-01    | 24C |       |       |      | BadR2, LowEfficiency, CtIsS  |
| lnuB-02    | 24C |       |       |      | NoAmplification              |

|                |     |       |       |      |                              |
|----------------|-----|-------|-------|------|------------------------------|
| lnuC           | 24C | 35.7  | 84.13 | 1.69 | MultipleMeltPeaks            |
| marR-01        | 24C | 33.39 | 82.54 | 1.95 | MultipleMeltPeaks            |
| matA/mel       | 24C | 26.39 | 77.11 | 2.03 | MultipleMeltPeaks            |
| mdet1          | 24C |       |       |      | NoAmplification              |
| mdtA           | 24C |       |       |      | CtIsLarge, CurveFitFailed    |
| mdtE/yhiU      | 24C | 38.93 | 82.89 | 1.9  | MultipleMeltPeaks            |
| mecA           | 24C |       |       |      | LowEfficiency, CtIsSmall, S: |
| mefA           | 24C | 24.97 | 80.15 | 1.96 | MultipleMeltPeaks            |
| mepA           | 24C |       |       |      | BadR2, LowEfficiency, CtIsS  |
| mexA           | 24C |       |       |      | LowEfficiency, CtIsSmall, S: |
| mexD           | 24C | 36.65 | 79.43 | 2    | MultipleMeltPeaks            |
| mexE           | 24C |       |       |      | NoAmplification              |
| mexF           | 24C | 28.55 | 85.32 | 1.61 |                              |
| mphA-01        | 24C | 31.58 | 86.62 | 1.95 |                              |
| mphA-02        | 24C | 30.46 | 86.68 | 1.57 |                              |
| mphB           | 24C |       |       |      | CurveFitFailed               |
| mphC           | 24C |       |       |      | LowEfficiency, CtIsSmall, Ci |
| msrA-01        | 24C |       |       |      | LowEfficiency, CtIsSmall, S: |
| msrC-01        | 24C |       |       |      | NoAmplification              |
| mtrC-01        | 24C |       |       |      | NoAmplification              |
| mtrC-02        | 24C |       |       |      | NoAmplification              |
| mtrD-02        | 24C | 27.83 | 81.43 | 2    |                              |
| mtrD-03        | 24C |       |       |      | NoAmplification              |
| NDM1           | 24C |       |       |      | CurveFitFailed               |
| nimE           | 24C | 33.59 | 75.61 | 1.96 |                              |
| nisB           | 24C | 34.49 | 85.31 | 1.9  |                              |
| oleC           | 24C | 38.06 | 84.23 | 1.78 | MultipleMeltPeaks            |
| oprD           | 24C | 29.94 | 86.66 | 2    | MultipleMeltPeaks            |
| oprJ           | 24C | 31.39 | 79.88 | 1.87 |                              |
| pbp            | 24C |       |       |      | CurveFitFailed               |
| pbp2x          | 24C | 25.58 | 75.03 | 2.01 |                              |
| Pbp5           | 24C |       |       |      | LowEfficiency, CtIsSmall, Ci |
| penA           | 24C |       |       |      | CtIsLarge, CurveFitFailed    |
| pikR1          | 24C | 40.15 | 75.02 | 1.91 | MultipleMeltPeaks            |
| pikR2          | 24C | 31.85 | 84.51 | 2.06 |                              |
| pmrA           | 24C | 30.56 | 79.33 | 2.06 |                              |
| pncA           | 24C | 32.42 | 89.14 | 1.95 |                              |
| putative multi | 24C | 34.82 | 83.97 | 1.95 | MultipleMeltPeaks            |
| qac            | 24C |       |       |      | CurveFitFailed               |
| qacA           | 24C | 35.12 | 70.04 | 1.82 |                              |
| qacA/qacB      | 24C |       |       |      | NoAmplification              |
| qacEdelta1-0   | 24C |       |       |      | NoAmplification              |
| qacEdelta1-0   | 24C | 30.35 | 76.51 | 1.93 |                              |
| qacH-01        | 24C | 36.37 | 77.67 | 1.91 | MultipleMeltPeaks            |
| qacH-02        | 24C | 35.22 | 83.73 | 1.62 |                              |
| qnrA           | 24C |       |       |      | CurveFitFailed               |



|              |     |       |       |      |                              |
|--------------|-----|-------|-------|------|------------------------------|
| rarD-02      | 24C | 36.48 | 85.69 | 1.91 |                              |
| sat4         | 24C |       |       |      | CurveFitFailed               |
| sdeB         | 24C |       |       |      | LowEfficiency, CtIsSmall, S: |
| spcN-01      | 24C |       |       |      | NoAmplification              |
| speA         | 24C |       |       |      | NoAmplification              |
| str          | 24C |       |       |      | LowEfficiency, CtIsSmall, Ci |
| strA         | 24C |       |       |      | CurveFitFailed               |
| strB         | 24C |       |       |      | CurveFitFailed               |
| sul1         | 24C | 34.88 | 89.8  | 1.77 |                              |
| sul2         | 24C |       |       |      | LowEfficiency, CtIsSmall, Ci |
| sulA/foIP-01 | 24C | 26.23 | 80.35 | 1.99 |                              |
| sulA/foIP-03 | 24C | 24.88 | 82.66 | 1.98 |                              |
| tet(32)      | 24C |       |       |      | NoAmplification              |
| tet(34)      | 24C |       |       |      | CurveFitFailed               |
| tet(35)      | 24C |       |       |      | NoAmplification              |
| tet(36)-A    | 24C |       |       |      | LowEfficiency, CtIsSmall, S: |
| tet(36)-B    | 24C |       |       |      | LowEfficiency, CtIsSmall, S: |
| tet(37)      | 24C | 34.41 | 86.06 | 1.9  |                              |
| tetA-01      | 24C | 31.07 | 84.85 | 1.95 |                              |
| tetA-02      | 24C | 37.15 | 72.09 | 1.73 |                              |
| tetB-01      | 24C | 30.82 | 86.25 | 1.96 |                              |
| tetB-02      | 24C | 34.14 | 78.51 | 1.95 |                              |
| tetC-01      | 24C |       |       |      | NoAmplification              |
| tetC-02      | 24C |       |       |      | CurveFitFailed               |
| tetD-01      | 24C |       |       |      | LowEfficiency, CtIsSmall, S: |
| tetD-02      | 24C | 36.2  | 76.61 | 1.95 |                              |
| tetE         | 24C |       |       |      | NoAmplification              |
| tetG-01      | 24C | 35.5  | 82.3  | 1.87 |                              |
| tetG-02      | 24C |       |       |      | CtIsLarge, CurveFitFailed    |
| tetH         | 24C |       |       |      | NoAmplification              |
| tetJ         | 24C |       |       |      | CurveFitFailed               |
| tetK         | 24C |       |       |      | CurveFitFailed               |
| tetL-01      | 24C |       |       |      | CurveFitFailed               |
| tetL-02      | 24C | 36.02 | 85.21 | 1.73 |                              |
| tetM-01      | 24C | 27.25 | 75.48 | 2.01 |                              |
| tetM-02      | 24C | 28.26 | 77.77 | 2.01 |                              |
| tetO-01      | 24C | 29.46 | 76.72 | 2.04 |                              |
| tetPA        | 24C |       |       |      | NoAmplification              |
| tetPB-01     | 24C |       |       |      | NoAmplification              |
| tetPB-02     | 24C | 29.05 | 84.78 | 2.05 |                              |
| tetPB-03     | 24C |       |       |      | LowEfficiency, CtIsSmall, S: |
| tetPB-05     | 24C |       |       |      | LowEfficiency, CtIsSmall, Ci |
| tetQ         | 24C |       |       |      | CurveFitFailed               |
| tetR-02      | 24C | 36.43 | 84.72 | 1.77 | MultipleMeltPeaks            |
| tetR-03      | 24C |       |       |      | NoAmplification              |
| tetS         | 24C | 37.62 | 77.54 | 1.89 |                              |

|             |     |       |       |      |                              |
|-------------|-----|-------|-------|------|------------------------------|
| tetT        | 24C |       |       |      | NoAmplification              |
| tetU-01     | 24C |       |       |      | CurveFitFailed               |
| tetV        | 24C |       |       |      | LowEfficiency, CtIsSmall, Ci |
| tetW-01     | 24C |       |       |      | LowEfficiency, CtIsSmall, S: |
| tetX        | 24C |       |       |      | LowEfficiency, CtIsSmall, Ci |
| tnpA-01     | 24C | 34.19 | 83.72 | 1.94 |                              |
| tnpA-02     | 24C | 43.24 | 83.73 | 1.51 |                              |
| tnpA-03     | 24C | 24.12 | 77.83 | 2.14 |                              |
| tnpA-04     | 24C |       |       |      | CurveFitFailed               |
| tnpA-05     | 24C |       |       |      | LowEfficiency, CtIsSmall, Ci |
| tnpA-07     | 24C |       |       |      | NoAmplification              |
| tolC-01     | 24C |       |       |      | NoAmplification              |
| tolC-02     | 24C | 30.22 | 83.5  | 1.94 | MultipleMeltPeaks            |
| tolC-03     | 24C | 30.73 | 87.41 | 1.96 |                              |
| Tp614       | 24C | 41.88 | 82.14 | 1.66 | MultipleMeltPeaks            |
| ttgA        | 24C | 40.74 | 86.69 | 1.82 | MultipleMeltPeaks            |
| ttgB        | 24C |       |       |      | NoAmplification              |
| vanA        | 24C |       |       |      | NoAmplification              |
| vanB-01     | 24C | 32.5  | 83.68 | 2.03 |                              |
| vanC-01     | 24C |       |       |      | CurveFitFailed               |
| vanC-02     | 24C |       |       |      | CurveFitFailed               |
| vanC-03     | 24C | 27.37 | 85.88 | 1.91 | MultipleMeltPeaks            |
| vanC1       | 24C |       |       |      | CurveFitFailed               |
| vanC2/vanC3 | 24C | 30.34 | 80.24 | 2.01 | MultipleMeltPeaks            |
| vanG        | 24C |       |       |      | CurveFitFailed               |
| vanHB       | 24C | 42.16 | 79    | 1.67 |                              |
| vanHD       | 24C | 35.04 | 74.8  | 1.93 | MultipleMeltPeaks            |
| vanRA-01    | 24C |       |       |      | NoAmplification              |
| vanRA-02    | 24C |       |       |      | CurveFitFailed               |
| vanRB       | 24C |       |       |      | CurveFitFailed               |
| vanRC       | 24C |       |       |      | NoAmplification              |
| vanRC4      | 24C |       |       |      | LowEfficiency, CtIsSmall, S: |
| vanRD       | 24C |       |       |      | NoAmplification              |
| vanSA       | 24C |       |       |      | LowEfficiency, CtIsSmall, Ci |
| vanSB       | 24C | 35.83 | 75.03 | 1.93 |                              |
| vanSC-01    | 24C | 37.51 | 84.07 | 1.85 |                              |
| vanSC-02    | 24C |       |       |      | NoAmplification              |
| vanTC-01    | 24C |       |       |      | CurveFitFailed               |
| vanTC-02    | 24C |       |       |      | NoAmplification              |
| vanTE       | 24C | 40.96 | 78.09 | 1.72 | MultipleMeltPeaks            |
| vanTG       | 24C |       |       |      | NoAmplification              |
| vanWB       | 24C |       |       |      | LowEfficiency, CtIsSmall, S: |
| vanWG       | 24C |       |       |      | CurveFitFailed               |
| vanXA       | 24C |       |       |      | NoAmplification              |
| vanXB       | 24C |       |       |      | NoAmplification              |
| vanXD       | 24C | 31.23 | 75.24 | 2.07 |                              |

|              |     |       |       |      |                              |
|--------------|-----|-------|-------|------|------------------------------|
| vanYB        | 24C |       |       |      | CurveFitFailed               |
| vanYD-01     | 24C | 31.43 | 81.67 | 1.84 |                              |
| vanYD-02     | 24C |       |       |      | NoAmplification              |
| vatB-01      | 24C |       |       |      | NoAmplification              |
| vatB-02      | 24C | 32.12 | 81.16 | 2.02 |                              |
| vatC-01      | 24C | 34    | 81.17 | 1.92 |                              |
| vatC-02      | 24C | 37.78 | 73.47 | 1.84 | MultipleMeltPeaks            |
| vatE-01      | 24C | 31.65 | 76.69 | 2.07 |                              |
| vatE-02      | 24C |       |       |      | NoAmplification              |
| vgaA-01      | 24C |       |       |      | CurveFitFailed               |
| vgaA-02      | 24C |       |       |      | CurveFitFailed               |
| vgb-01       | 24C | 37.98 | 75.41 | 1.87 | MultipleMeltPeaks            |
| vgbB-01      | 24C |       |       |      | BadR2, LowEfficiency, CtIsS  |
| vgbB-02      | 24C |       |       |      | NoAmplification              |
| yceE/mdtG-0  | 24C |       |       |      | CurveFitFailed               |
| yceE/mdtG-0  | 24C |       |       |      | BadR2, CtIsLarge, CurveFitf  |
| yceL/mdtH-0  | 24C | 33.29 | 83.75 | 1.89 | MultipleMeltPeaks            |
| yceL/mdtH-0  | 24C |       |       |      | NoAmplification              |
| yceL/mdtH-0  | 24C |       |       |      | CurveFitFailed               |
| yidY/mdtL-01 | 24C | 35.15 | 76.77 | 1.93 | MultipleMeltPeaks            |
| yidY/mdtL-02 | 24C |       |       |      | LowEfficiency, CtIsSmall, Ci |































| Assay          | Sample | Ct | Tm    | Efficiency | flag                         |
|----------------|--------|----|-------|------------|------------------------------|
| 16S rRNA       | 25A    |    | 15.55 | 82.32      | 1.94                         |
| aac            | 25A    |    | 34.76 | 82.31      | 2.04 MultipleMeltPeaks       |
| aac(6')-Ib(akz | 25A    |    |       |            | CurveFitFailed               |
| aac(6')-Ib(akz | 25A    |    | 35.86 | 86.27      | 1.84 MultipleMeltPeaks       |
| aac(6')-Ib(akz | 25A    |    | 32.48 | 76.41      | 1.99 MultipleMeltPeaks       |
| aac(6')-II     | 25A    |    |       |            | LowEfficiency, CtIsSmall, Ci |
| aac(6')I1      | 25A    |    |       |            | NoAmplification              |
| aacA/aphD      | 25A    |    |       |            | LowEfficiency, CtIsSmall, Ci |
| aacC           | 25A    |    | 36.71 | 78.13      | 1.73 MultipleMeltPeaks       |
| aacC1          | 25A    |    |       |            | NoAmplification              |
| aacC2          | 25A    |    |       |            | NoAmplification              |
| aacC4          | 25A    |    |       |            | NoAmplification              |
| aadA-01        | 25A    |    |       |            | LowEfficiency, CtIsSmall, S: |
| aadA-02        | 25A    |    |       |            | CurveFitFailed               |
| aadA-1-01      | 25A    |    |       |            | NoAmplification              |
| aadA-1-02      | 25A    |    |       |            | NoAmplification              |
| aadA1          | 25A    |    |       |            | CurveFitFailed               |
| aadA2-01       | 25A    |    |       |            | NoAmplification              |
| aadA2-02       | 25A    |    | 36.36 | 74.67      | 1.97                         |
| aadA2-03       | 25A    |    |       |            | NoAmplification              |
| aadA5-01       | 25A    |    |       |            | CurveFitFailed               |
| aadA5-02       | 25A    |    | 42.98 | 78.5       | 1.68 MultipleMeltPeaks       |
| aadA9-01       | 25A    |    |       |            | CurveFitFailed               |
| aadA9-02       | 25A    |    |       |            | LowEfficiency, CtIsSmall, Ci |
| aadD           | 25A    |    |       |            | NoAmplification              |
| aadE           | 25A    |    |       |            | NoAmplification              |
| acrA-01        | 25A    |    | 33.97 | 79.83      | 1.92 MultipleMeltPeaks       |
| acrA-02        | 25A    |    | 29.92 | 81.95      | 1.89                         |
| acrA-03        | 25A    |    |       |            | CurveFitFailed               |
| acrA-04        | 25A    |    | 33.82 | 86.08      | 1.99 MultipleMeltPeaks       |
| acrA-05        | 25A    |    | 30.4  | 88.58      | 1.94                         |
| acrB-01        | 25A    |    |       |            | NoAmplification              |
| acrF           | 25A    |    | 35.99 | 76.21      | 1.97                         |
| acrR-01        | 25A    |    | 38.06 | 85.92      | 1.81                         |
| acrR-02        | 25A    |    |       |            | CurveFitFailed               |
| Actin          | 25A    |    | 23    | 87.23      | 1.92                         |
| adeA           | 25A    |    |       |            | NoAmplification              |
| ampC-01        | 25A    |    | 37.45 | 79.89      | 1.87                         |
| ampC-02        | 25A    |    | 36.99 | 88.62      | 1.89                         |
| ampC-04        | 25A    |    | 36.54 | 77.18      | 2.05                         |
| ampC-05        | 25A    |    |       |            | CurveFitFailed               |
| ampC-06        | 25A    |    |       |            | NoAmplification              |
| ampC-07        | 25A    |    |       |            | NoAmplification              |
| ampC-09        | 25A    |    |       |            | LowEfficiency, CtIsSmall, S: |
| ampC/blaDH     | 25A    |    | 31.42 | 84.59      | 1.94                         |

|                          |     |       |       |      |                              |
|--------------------------|-----|-------|-------|------|------------------------------|
| aph                      | 25A |       |       |      | LowEfficiency, CtIsSmall, Ci |
| aph(2')-Id-01            | 25A |       |       |      | LowEfficiency, CtIsSmall, Ci |
| aph(2')-Id-02            | 25A |       |       |      | CurveFitFailed               |
| aph6ia                   | 25A |       |       |      | NoAmplification              |
| aphA1(aka k <sub>e</sub> | 25A |       |       |      | LowEfficiency, CtIsSmall, Ci |
| bacA-01                  | 25A |       |       |      | NoAmplification              |
| bacA-02                  | 25A | 29.33 | 83.45 | 1.99 |                              |
| BETA-globin              | 25A | 24.14 | 84.1  | 2    |                              |
| bla-ACC-1                | 25A |       |       |      | NoAmplification              |
| bla-L1                   | 25A | 32.07 | 84.55 | 1.99 |                              |
| bla1                     | 25A |       |       |      | CurveFitFailed               |
| blaCMY                   | 25A | 31.27 | 80.75 | 1.9  |                              |
| blaCMY2-01               | 25A |       |       |      | CurveFitFailed               |
| blaCMY2-02               | 25A | 36.33 | 81.76 | 1.87 |                              |
| blaCTX-M-01              | 25A | 36.72 | 85.95 | 1.87 | MultipleMeltPeaks            |
| blaCTX-M-02              | 25A |       |       |      | CurveFitFailed               |
| blaCTX-M-03              | 25A |       |       |      | NoAmplification              |
| blaCTX-M-04              | 25A | 38.69 | 78.51 | 1.77 | MultipleMeltPeaks            |
| blaCTX-M-05              | 25A | 32.79 | 76.71 | 1.75 |                              |
| blaCTX-M-06              | 25A | 42    | 77.27 | 1.84 |                              |
| blaGES                   | 25A |       |       |      | NoAmplification              |
| blaIMP-01                | 25A |       |       |      | NoAmplification              |
| blaIMP-02                | 25A |       |       |      | CurveFitFailed               |
| blaMOX/blaC              | 25A |       |       |      | NoAmplification              |
| blaOCH                   | 25A | 31.33 | 90.44 | 2.02 |                              |
| blaOKP                   | 25A |       |       |      | NoAmplification              |
| blaOXA1/blaC             | 25A |       |       |      | CurveFitFailed               |
| blaOXA10-01              | 25A |       |       |      | CurveFitFailed               |
| blaOXA10-02              | 25A |       |       |      | CurveFitFailed               |
| blaOXY                   | 25A |       |       |      | CurveFitFailed               |
| blaPAO                   | 25A |       |       |      | NoAmplification              |
| blaPER                   | 25A |       |       |      | CurveFitFailed               |
| blaPSE                   | 25A |       |       |      | NoAmplification              |
| blaROB                   | 25A |       |       |      | NoAmplification              |
| blaSFO                   | 25A | 32.81 | 80.82 | 1.82 | MultipleMeltPeaks            |
| blaSHV-01                | 25A |       |       |      | CurveFitFailed               |
| blaSHV-02                | 25A | 32.69 | 85.59 | 1.97 |                              |
| blaTEM                   | 25A | 27.31 | 79.44 | 1.81 |                              |
| blaTLA                   | 25A |       |       |      | CurveFitFailed               |
| blaVEB                   | 25A |       |       |      | NoAmplification              |
| blaVIM                   | 25A | 38.32 | 79.02 | 2    |                              |
| blaZ                     | 25A |       |       |      | CurveFitFailed               |
| carB                     | 25A |       |       |      | NoAmplification              |
| catA1                    | 25A |       |       |      | NoAmplification              |
| catB3                    | 25A |       |       |      | NoAmplification              |
| catB8                    | 25A | 35.3  | 81.72 | 1.87 | MultipleMeltPeaks            |

|            |     |       |       |      |                              |
|------------|-----|-------|-------|------|------------------------------|
| ceoA       | 25A | 31.87 | 82.36 | 1.92 |                              |
| cepA       | 25A |       |       |      | NoAmplification              |
| cfiA       | 25A |       |       |      | NoAmplification              |
| cfr        | 25A |       |       |      | CurveFitFailed               |
| cfxA       | 25A | 25    | 77.58 | 2.06 |                              |
| cmeA       | 25A |       |       |      | LowEfficiency, CtIsSmall, S: |
| cmlA1-01   | 25A | 39.95 | 78.88 | 1.86 |                              |
| cmlA1-02   | 25A |       |       |      | NoAmplification              |
| cmr        | 25A | 30.54 | 78.75 | 1.94 |                              |
| cmx(A)     | 25A | 28.77 | 85.41 | 1.95 |                              |
| cphA-01    | 25A | 36.28 | 78.1  | 1.91 | MultipleMeltPeaks            |
| cphA-02    | 25A |       |       |      | CurveFitFailed               |
| dfrA1      | 25A |       |       |      | NoAmplification              |
| dfrA12     | 25A |       |       |      | CurveFitFailed               |
| emrD       | 25A |       |       |      | NoAmplification              |
| ereA       | 25A |       |       |      | NoAmplification              |
| ereB       | 25A | 40.75 | 75.94 | 1.71 |                              |
| erm(34)    | 25A |       |       |      | NoAmplification              |
| erm(35)    | 25A |       |       |      | CurveFitFailed               |
| erm(36)    | 25A |       |       |      | NoAmplification              |
| ermA       | 25A |       |       |      | CurveFitFailed               |
| ermA/ermTR | 25A | 29.65 | 75.51 | 1.93 |                              |
| ermB       | 25A | 27.39 | 75.06 | 2.11 |                              |
| ermC       | 25A | 29.97 | 75.33 | 1.76 |                              |
| ermF       | 25A |       |       |      | LowEfficiency, CtIsSmall, S: |
| ermJ/ermD  | 25A |       |       |      | NoAmplification              |
| ermK-01    | 25A | 30.02 | 75.41 | 1.99 |                              |
| ermK-02    | 25A |       |       |      | NoAmplification              |
| ermT-01    | 25A |       |       |      | CurveFitFailed               |
| ermT-02    | 25A |       |       |      | NoAmplification              |
| ermX       | 25A |       |       |      | NoAmplification              |
| ermY       | 25A |       |       |      | NoAmplification              |
| fabK       | 25A | 26.67 | 79.11 | 2.02 |                              |
| floR       | 25A |       |       |      | NoAmplification              |
| folA       | 25A |       |       |      | NoAmplification              |
| fosB       | 25A |       |       |      | LowEfficiency, CtIsSmall, S: |
| fosX       | 25A |       |       |      | CurveFitFailed               |
| fox5       | 25A | 32.66 | 86.32 | 1.9  |                              |
| imiR       | 25A |       |       |      | NoAmplification              |
| ImrA-01    | 25A | 39.51 | 83.64 | 1.67 |                              |
| intl       | 25A | 30.71 | 84.84 | 1.95 |                              |
| intl1      | 25A | 23.43 | 83.92 | 1.95 |                              |
| IS613      | 25A | 24.89 | 79.7  | 2.07 |                              |
| lnuA-01    | 25A | 27.35 | 73.88 | 1.93 |                              |
| lnuB-01    | 25A |       |       |      | CurveFitFailed               |
| lnuB-02    | 25A |       |       |      | CurveFitFailed               |

|               |     |       |       |      |                              |
|---------------|-----|-------|-------|------|------------------------------|
| lnuC          | 25A |       |       |      | BadR2, LowEfficiency, CtIsS  |
| marR-01       | 25A | 37.72 | 88.32 | 1.77 | MultipleMeltPeaks            |
| matA/mel      | 25A | 19.05 | 77.7  | 2.07 |                              |
| mdet1         | 25A |       |       |      | CurveFitFailed               |
| mdtA          | 25A |       |       |      | BadR2, LowEfficiency, CtIsS  |
| mdtE/yhiU     | 25A | 39.35 | 85.43 | 1.51 |                              |
| mecA          | 25A |       |       |      | NoAmplification              |
| mefA          | 25A | 18.29 | 80.45 | 2    |                              |
| mepA          | 25A | 29.99 | 88.82 | 1.97 |                              |
| mexA          | 25A |       |       |      | CurveFitFailed               |
| mexD          | 25A | 37.31 | 79.51 | 1.89 |                              |
| mexE          | 25A |       |       |      | NoAmplification              |
| mexF          | 25A | 29.44 | 81.71 | 1.53 | MultipleMeltPeaks            |
| mphA-01       | 25A | 32.53 | 79.97 | 1.84 | MultipleMeltPeaks            |
| mphA-02       | 25A | 33.24 | 86.59 | 1.59 | MultipleMeltPeaks            |
| mphB          | 25A |       |       |      | BadR2, LowEfficiency, CtIsS  |
| mphC          | 25A |       |       |      | LowEfficiency, CtIsSmall, Ci |
| msrA-01       | 25A |       |       |      | LowEfficiency, CtIsSmall, Ci |
| msrC-01       | 25A |       |       |      | NoAmplification              |
| mtrC-01       | 25A |       |       |      | NoAmplification              |
| mtrC-02       | 25A |       |       |      | NoAmplification              |
| mtrD-02       | 25A | 29.55 | 81.12 | 2    |                              |
| mtrD-03       | 25A |       |       |      | NoAmplification              |
| NDM1          | 25A |       |       |      | NoAmplification              |
| nimE          | 25A |       |       |      | LowEfficiency, CtIsSmall, Ci |
| nisB          | 25A |       |       |      | NoAmplification              |
| oleC          | 25A | 36.44 | 89.99 | 1.8  |                              |
| oprD          | 25A | 29.42 | 82.02 | 1.96 |                              |
| oprJ          | 25A | 33.04 | 89.78 | 1.81 | MultipleMeltPeaks            |
| pbp           | 25A |       |       |      | LowEfficiency, CtIsSmall, S  |
| pbp2x         | 25A | 29.94 | 75.43 | 1.93 |                              |
| Pbp5          | 25A |       |       |      | LowEfficiency, CtIsSmall, Ci |
| penA          | 25A |       |       |      | NoAmplification              |
| pikR1         | 25A |       |       |      | NoAmplification              |
| pikR2         | 25A | 34.85 | 84.42 | 1.97 | MultipleMeltPeaks            |
| pmrA          | 25A | 22.08 | 79.19 | 2.02 |                              |
| pncA          | 25A | 38.17 | 91.79 | 1.68 | MultipleMeltPeaks            |
| putative mul1 | 25A |       |       |      | NoAmplification              |
| qac           | 25A | 39.67 | 73.61 | 1.84 |                              |
| qacA          | 25A | 35.08 | 70.07 | 1.76 |                              |
| qacA/qacB     | 25A |       |       |      | NoAmplification              |
| qacEdelta1-0  | 25A |       |       |      | NoAmplification              |
| qacEdelta1-0  | 25A |       |       |      | CurveFitFailed               |
| qacH-01       | 25A | 42.47 | 79.56 | 1.72 |                              |
| qacH-02       | 25A |       |       |      | NoAmplification              |
| qnrA          | 25A |       |       |      | NoAmplification              |

|              |     |       |       |      |                              |
|--------------|-----|-------|-------|------|------------------------------|
| rarD-02      | 25A |       |       |      | NoAmplification              |
| sat4         | 25A |       |       |      | LowEfficiency, CtIsSmall, Ci |
| sdeB         | 25A |       |       |      | CurveFitFailed               |
| spcN-01      | 25A |       |       |      | NoAmplification              |
| speA         | 25A |       |       |      | NoAmplification              |
| str          | 25A |       |       |      | NoAmplification              |
| strA         | 25A |       |       |      | CurveFitFailed               |
| strB         | 25A | 42.6  | 61.82 | 1.63 | MultipleMeltPeaks            |
| sul1         | 25A |       |       |      | NoAmplification              |
| sul2         | 25A |       |       |      | NoAmplification              |
| sulA/foIP-01 | 25A | 20.87 | 81.33 | 1.95 |                              |
| sulA/foIP-03 | 25A | 20.59 | 84.23 | 1.97 |                              |
| tet(32)      | 25A | 27.06 | 81.22 | 1.97 |                              |
| tet(34)      | 25A | 34.72 | 74.9  | 1.97 |                              |
| tet(35)      | 25A |       |       |      | NoAmplification              |
| tet(36)-A    | 25A |       |       |      | NoAmplification              |
| tet(36)-B    | 25A |       |       |      | LowEfficiency, CtIsSmall, Ci |
| tet(37)      | 25A | 26.75 | 76.34 | 2    |                              |
| tetA-01      | 25A | 36.33 | 85.08 | 1.87 |                              |
| tetA-02      | 25A | 33.55 | 78.52 | 1.98 |                              |
| tetB-01      | 25A | 38.63 | 86.21 | 1.68 |                              |
| tetB-02      | 25A |       |       |      | CurveFitFailed               |
| tetC-01      | 25A |       |       |      | NoAmplification              |
| tetC-02      | 25A |       |       |      | CurveFitFailed               |
| tetD-01      | 25A |       |       |      | CurveFitFailed               |
| tetD-02      | 25A |       |       |      | CurveFitFailed               |
| tetE         | 25A |       |       |      | NoAmplification              |
| tetG-01      | 25A |       |       |      | CurveFitFailed               |
| tetG-02      | 25A | 35.9  | 78.93 | 1.89 |                              |
| tetH         | 25A |       |       |      | NoAmplification              |
| tetJ         | 25A |       |       |      | CurveFitFailed               |
| tetK         | 25A | 29.06 | 72.42 | 2.03 |                              |
| tetL-01      | 25A |       |       |      | NoAmplification              |
| tetL-02      | 25A | 26.37 | 78.99 | 2.02 |                              |
| tetM-01      | 25A | 20.35 | 76.14 | 2    |                              |
| tetM-02      | 25A | 21.24 | 77.75 | 2    |                              |
| tetO-01      | 25A |       |       |      | LowEfficiency, CtIsSmall, Ci |
| tetPA        | 25A |       |       |      | NoAmplification              |
| tetPB-01     | 25A | 40.62 | 83.42 | 1.63 |                              |
| tetPB-02     | 25A | 32.07 | 88.66 | 1.98 | MultipleMeltPeaks            |
| tetPB-03     | 25A |       |       |      | NoAmplification              |
| tetPB-05     | 25A |       |       |      | NoAmplification              |
| tetQ         | 25A | 29.09 | 77.3  | 2.01 |                              |
| tetR-02      | 25A | 33.4  | 79.83 | 1.4  | MultipleMeltPeaks            |
| tetR-03      | 25A |       |       |      | CurveFitFailed               |
| tetS         | 25A |       |       |      | CurveFitFailed               |

|             |     |       |       |      |                              |
|-------------|-----|-------|-------|------|------------------------------|
| tetT        | 25A |       |       |      | NoAmplification              |
| tetU-01     | 25A |       |       |      | NoAmplification              |
| tetV        | 25A |       |       |      | CurveFitFailed               |
| tetW-01     | 25A | 23.25 | 81.98 | 1.99 |                              |
| tetX        | 25A |       |       |      | LowEfficiency, CtIsSmall, Ci |
| tnpA-01     | 25A |       |       |      | LowEfficiency, CtIsSmall, Ci |
| tnpA-02     | 25A |       |       |      | NoAmplification              |
| tnpA-03     | 25A | 28.39 | 77.91 | 2    |                              |
| tnpA-04     | 25A | 29.48 | 82.41 | 1.92 |                              |
| tnpA-05     | 25A | 24.66 | 80.93 | 1.92 |                              |
| tnpA-07     | 25A |       |       |      | NoAmplification              |
| tolC-01     | 25A |       |       |      | NoAmplification              |
| tolC-02     | 25A | 29.03 | 78.77 | 1.92 |                              |
| tolC-03     | 25A | 27.64 | 79.63 | 1.89 |                              |
| Tp614       | 25A |       |       |      | BadR2, LowEfficiency, CtIsS  |
| ttgA        | 25A |       |       |      | BadR2, LowEfficiency, CtIsS  |
| ttgB        | 25A |       |       |      | CurveFitFailed               |
| vanA        | 25A |       |       |      | NoAmplification              |
| vanB-01     | 25A | 37.36 | 84.58 | 1.85 |                              |
| vanC-01     | 25A |       |       |      | CurveFitFailed               |
| vanC-02     | 25A |       |       |      | CurveFitFailed               |
| vanC-03     | 25A | 30.05 | 91.43 | 1.9  | MultipleMeltPeaks            |
| vanC1       | 25A |       |       |      | CurveFitFailed               |
| vanC2/vanC3 | 25A |       |       |      | CurveFitFailed               |
| vanG        | 25A |       |       |      | NoAmplification              |
| vanHB       | 25A | 33.97 | 85.05 | 2    |                              |
| vanHD       | 25A |       |       |      | CurveFitFailed               |
| vanRA-01    | 25A |       |       |      | LowEfficiency, CtIsSmall, Ci |
| vanRA-02    | 25A |       |       |      | NoAmplification              |
| vanRB       | 25A | 41.99 | 64.73 | 1.73 | MultipleMeltPeaks            |
| vanRC       | 25A |       |       |      | CurveFitFailed               |
| vanRC4      | 25A |       |       |      | CurveFitFailed               |
| vanRD       | 25A |       |       |      | NoAmplification              |
| vanSA       | 25A |       |       |      | LowEfficiency, CtIsSmall, Ci |
| vanSB       | 25A | 29.46 | 74.76 | 2.04 |                              |
| vanSC-01    | 25A | 38.11 | 78.34 | 2.1  |                              |
| vanSC-02    | 25A |       |       |      | NoAmplification              |
| vanTC-01    | 25A |       |       |      | LowEfficiency, CtIsSmall, Ci |
| vanTC-02    | 25A |       |       |      | NoAmplification              |
| vanTE       | 25A |       |       |      | NoAmplification              |
| vanTG       | 25A |       |       |      | NoAmplification              |
| vanWB       | 25A |       |       |      | CurveFitFailed               |
| vanWG       | 25A | 42.47 | 74.14 | 1.86 |                              |
| vanXA       | 25A |       |       |      | NoAmplification              |
| vanXB       | 25A |       |       |      | NoAmplification              |
| vanXD       | 25A | 31.6  | 75.69 | 2.03 |                              |

|              |     |       |       |      |                              |
|--------------|-----|-------|-------|------|------------------------------|
| vanYB        | 25A |       |       |      | LowEfficiency, CtIsSmall, Ci |
| vanYD-01     | 25A | 35.96 | 80.89 | 1.83 |                              |
| vanYD-02     | 25A |       |       |      | NoAmplification              |
| vatB-01      | 25A |       |       |      | LowEfficiency, CtIsSmall, Ci |
| vatB-02      | 25A |       |       |      | CurveFitFailed               |
| vatC-01      | 25A |       |       |      | CurveFitFailed               |
| vatC-02      | 25A |       |       |      | CurveFitFailed               |
| vatE-01      | 25A | 32.38 | 76.1  | 2.04 |                              |
| vatE-02      | 25A |       |       |      | NoAmplification              |
| vgaA-01      | 25A |       |       |      | LowEfficiency, CtIsSmall, Ci |
| vgaA-02      | 25A |       |       |      | LowEfficiency, CtIsSmall, S  |
| vgb-01       | 25A |       |       |      | NoAmplification              |
| vgbB-01      | 25A |       |       |      | NoAmplification              |
| vgbB-02      | 25A |       |       |      | NoAmplification              |
| yceE/mdtG-0  | 25A |       |       |      | BadR2, LowEfficiency, CtIsS  |
| yceE/mdtG-0  | 25A |       |       |      | NoAmplification              |
| yceL/mdtH-0  | 25A | 32.55 | 87.82 | 1.87 |                              |
| yceL/mdtH-0  | 25A |       |       |      | NoAmplification              |
| yceL/mdtH-0  | 25A |       |       |      | CurveFitFailed               |
| yidY/mdtL-01 | 25A | 27.47 | 83.48 | 1.92 |                              |
| yidY/mdtL-02 | 25A |       |       |      | NoAmplification              |































| Assay          | Sample | Ct | Tm    | Efficiency | flag                         |
|----------------|--------|----|-------|------------|------------------------------|
| 16S rRNA       | 25B    |    | 12.14 | 81.52      | 2.09                         |
| aac            | 25B    |    | 29.06 | 82.46      | 1.61 MultipleMeltPeaks       |
| aac(6')-Ib(akε | 25B    |    | 34.87 | 77.87      | 1.9 MultipleMeltPeaks        |
| aac(6')-Ib(akε | 25B    |    | 29.22 | 81.93      | 1.99 MultipleMeltPeaks       |
| aac(6')-Ib(akε | 25B    |    | 30.96 | 87.19      | 1.92 MultipleMeltPeaks       |
| aac(6')-II     | 25B    |    | 35.45 | 86.72      | 1.77                         |
| aac(6')I1      | 25B    |    | 35.09 | 89.85      | 1.86 MultipleMeltPeaks       |
| aacA/aphD      | 25B    |    |       |            | LowEfficiency, CtIsSmall, Ci |
| aacC           | 25B    |    | 25.43 | 87.63      | 1.77 MultipleMeltPeaks       |
| aacC1          | 25B    |    |       |            | LowEfficiency, CtIsSmall, Ci |
| aacC2          | 25B    |    |       |            | LowEfficiency, CtIsSmall, Ci |
| aacC4          | 25B    |    | 36.19 | 91.72      | 1.78                         |
| aadA-01        | 25B    |    |       |            | LowEfficiency, CtIsSmall, Ci |
| aadA-02        | 25B    |    |       |            | CurveFitFailed               |
| aadA-1-01      | 25B    |    | 37.44 | 81.28      | 1.94                         |
| aadA-1-02      | 25B    |    |       |            | BadR2, LowEfficiency, CtIsS  |
| aadA1          | 25B    |    | 33.89 | 84.03      | 2.06                         |
| aadA2-01       | 25B    |    |       |            | CurveFitFailed               |
| aadA2-02       | 25B    |    | 32.39 | 75.21      | 2.01                         |
| aadA2-03       | 25B    |    |       |            | CurveFitFailed               |
| aadA5-01       | 25B    |    | 30.09 | 84.77      | 1.94                         |
| aadA5-02       | 25B    |    | 30.94 | 86.8       | 1.92                         |
| aadA9-01       | 25B    |    | 35.3  | 89.08      | 1.84                         |
| aadA9-02       | 25B    |    | 30.5  | 77.2       | 2.04                         |
| aadD           | 25B    |    |       |            | LowEfficiency, CtIsSmall, Ci |
| aadE           | 25B    |    |       |            | LowEfficiency, CtIsSmall, Ci |
| acrA-01        | 25B    |    | 30.46 | 88.7       | 2                            |
| acrA-02        | 25B    |    | 27.38 | 85.57      | 1.9                          |
| acrA-03        | 25B    |    | 29.39 | 77.82      | 1.93                         |
| acrA-04        | 25B    |    | 28.58 | 85.06      | 1.99                         |
| acrA-05        | 25B    |    | 28.98 | 88.49      | 1.99                         |
| acrB-01        | 25B    |    | 28.06 | 82.27      | 1.98                         |
| acrF           | 25B    |    | 32.66 | 81.49      | 1.69 MultipleMeltPeaks       |
| acrR-01        | 25B    |    | 33.76 | 78.27      | 1.81 MultipleMeltPeaks       |
| acrR-02        | 25B    |    | 36.53 | 84.89      | 1.8                          |
| Actin          | 25B    |    | 20.48 | 87.09      | 1.93                         |
| adeA           | 25B    |    | 35.94 | 82.08      | 1.85                         |
| ampC-01        | 25B    |    | 32.41 | 85.29      | 1.88 MultipleMeltPeaks       |
| ampC-02        | 25B    |    | 29.22 | 81.8       | 1.88                         |
| ampC-04        | 25B    |    | 32.71 | 78.35      | 1.76 MultipleMeltPeaks       |
| ampC-05        | 25B    |    |       |            | LowEfficiency, CtIsSmall, Ci |
| ampC-06        | 25B    |    |       |            | LowEfficiency, CtIsSmall, Ci |
| ampC-07        | 25B    |    |       |            | LowEfficiency, CtIsSmall, Ci |
| ampC-09        | 25B    |    | 28.28 | 83.38      | 1.9                          |
| ampC/blaDH     | 25B    |    | 28.76 | 84.11      | 2 MultipleMeltPeaks          |

|                            |     |       |       |      |                                          |
|----------------------------|-----|-------|-------|------|------------------------------------------|
| aph                        | 25B |       |       |      | LowEfficiency, CtIsSmall, Ci             |
| aph(2')-Id-01              | 25B |       |       |      | LowEfficiency, CtIsSmall, Ci             |
| aph(2')-Id-02              | 25B |       |       |      | LowEfficiency, CtIsSmall, Ci             |
| aph6ia                     | 25B | 34.37 | 78.67 | 1.96 |                                          |
| aphA1(aka k <sub>a</sub> ) | 25B | 32.66 | 83.12 | 2.06 |                                          |
| bacA-01                    | 25B |       |       |      | LowEfficiency, CtIsSmall, S <sub>e</sub> |
| bacA-02                    | 25B | 29.18 | 83.33 | 1.93 |                                          |
| BETA-globin                | 25B | 21.49 | 84    | 2    |                                          |
| bla-ACC-1                  | 25B |       |       |      | LowEfficiency, CtIsSmall, Ci             |
| bla-L1                     | 25B | 26.47 | 86.13 | 1.91 | MultipleMeltPeaks                        |
| bla1                       | 25B |       |       |      | CurveFitFailed                           |
| blaCMY                     | 25B |       |       |      | CurveFitFailed                           |
| blaCMY2-01                 | 25B | 36.45 | 83.5  | 1.93 | MultipleMeltPeaks                        |
| blaCMY2-02                 | 25B | 28.99 | 82.73 | 2    |                                          |
| blaCTX-M-01                | 25B | 31.32 | 81.93 | 2    |                                          |
| blaCTX-M-02                | 25B | 33.25 | 79.53 | 1.94 | MultipleMeltPeaks                        |
| blaCTX-M-03                | 25B |       |       |      | CurveFitFailed                           |
| blaCTX-M-04                | 25B | 27.14 | 85.18 | 1.81 |                                          |
| blaCTX-M-05                | 25B | 31.58 | 76.19 | 1.74 | MultipleMeltPeaks                        |
| blaCTX-M-06                | 25B |       |       |      | LowEfficiency, CtIsSmall, S <sub>e</sub> |
| blaGES                     | 25B |       |       |      | LowEfficiency, CtIsSmall, Ci             |
| blaIMP-01                  | 25B |       |       |      | LowEfficiency, CtIsSmall, Ci             |
| blaIMP-02                  | 25B | 35.2  | 85.17 | 1.91 |                                          |
| blaMOX/blaC                | 25B |       |       |      | BadR2, LowEfficiency, CtIsS              |
| blaOCH                     | 25B |       |       |      | NoAmplification                          |
| blaOKP                     | 25B |       |       |      | NoAmplification                          |
| blaOXA1/blaC               | 25B |       |       |      | CurveFitFailed                           |
| blaOXA10-01                | 25B |       |       |      | LowEfficiency, CtIsSmall, Ci             |
| blaOXA10-02                | 25B |       |       |      | LowEfficiency, CtIsSmall, S <sub>e</sub> |
| blaOXY                     | 25B | 26.9  | 86.63 | 1.69 |                                          |
| blaPAO                     | 25B | 35.81 | 84.51 | 1.92 |                                          |
| blaPER                     | 25B |       |       |      | LowEfficiency, CtIsSmall, Ci             |
| blaPSE                     | 25B |       |       |      | LowEfficiency, CtIsSmall, Ci             |
| blaROB                     | 25B | 35.87 | 86.66 | 1.86 |                                          |
| blaSFO                     | 25B | 31.16 | 80.57 | 1.91 | MultipleMeltPeaks                        |
| blaSHV-01                  | 25B |       |       |      | CurveFitFailed                           |
| blaSHV-02                  | 25B | 30.95 | 83.87 | 2.04 |                                          |
| blaTEM                     | 25B | 37.46 | 81.96 | 1.88 |                                          |
| blaTLA                     | 25B |       |       |      | LowEfficiency, CtIsSmall, Ci             |
| blaVEB                     | 25B |       |       |      | LowEfficiency, CtIsSmall, Ci             |
| blaVIM                     | 25B |       |       |      | LowEfficiency, CtIsSmall, Ci             |
| blaZ                       | 25B | 29.1  | 74.63 | 2.03 |                                          |
| carB                       | 25B | 31.78 | 83.83 | 2.03 |                                          |
| catA1                      | 25B |       |       |      | NoAmplification                          |
| catB3                      | 25B | 32.65 | 87.51 | 1.99 |                                          |
| catB8                      | 25B | 28.87 | 81.76 | 2.02 |                                          |

|            |     |       |       |      |                              |
|------------|-----|-------|-------|------|------------------------------|
| ceoA       | 25B | 27.52 | 82.12 | 1.96 | MultipleMeltPeaks            |
| cepA       | 25B |       |       |      | CurveFitFailed               |
| cfiA       | 25B | 31.54 | 88.65 | 1.93 |                              |
| cfr        | 25B |       |       |      | LowEfficiency, CtIsSmall, Ci |
| cfxA       | 25B | 25.33 | 77.5  | 2.04 |                              |
| cmeA       | 25B |       |       |      | LowEfficiency, CtIsSmall, S: |
| cmlA1-01   | 25B | 32.96 | 87.69 | 1.83 |                              |
| cmlA1-02   | 25B | 34.81 | 84.08 | 1.89 |                              |
| cmr        | 25B |       |       |      | CurveFitFailed               |
| cmx(A)     | 25B | 24.68 | 85.15 | 2.01 |                              |
| cphA-01    | 25B | 30.34 | 91.24 | 1.99 | MultipleMeltPeaks            |
| cphA-02    | 25B | 35.24 | 82.37 | 1.93 |                              |
| dfrA1      | 25B | 32.68 | 85.63 | 1.99 |                              |
| dfrA12     | 25B | 31.4  | 85.84 | 1.73 |                              |
| emrD       | 25B | 33.17 | 89.17 | 1.81 |                              |
| ereA       | 25B |       |       |      | CurveFitFailed               |
| ereB       | 25B | 36.08 | 85.27 | 1.88 | MultipleMeltPeaks            |
| erm(34)    | 25B | 34.47 | 84.43 | 1.88 | MultipleMeltPeaks            |
| erm(35)    | 25B |       |       |      | LowEfficiency, CtIsSmall, S: |
| erm(36)    | 25B | 31.7  | 84    | 1.66 |                              |
| ermA       | 25B |       |       |      | LowEfficiency, CtIsSmall, Ci |
| ermA/ermTR | 25B |       |       |      | NoAmplification              |
| ermB       | 25B |       |       |      | LowEfficiency, CtIsSmall, Ci |
| ermC       | 25B |       |       |      | CurveFitFailed               |
| ermF       | 25B |       |       |      | LowEfficiency, CtIsSmall, S: |
| ermJ/ermD  | 25B |       |       |      | CurveFitFailed               |
| ermK-01    | 25B |       |       |      | CurveFitFailed               |
| ermK-02    | 25B |       |       |      | LowEfficiency, CtIsSmall, S: |
| ermT-01    | 25B |       |       |      | CurveFitFailed               |
| ermT-02    | 25B | 38.19 | 79.84 | 1.89 | MultipleMeltPeaks            |
| ermX       | 25B | 26.53 | 83.73 | 1.87 |                              |
| ermY       | 25B |       |       |      | CurveFitFailed               |
| fabK       | 25B | 17.07 | 77.33 | 2.09 |                              |
| floR       | 25B | 35.79 | 87.02 | 1.78 | MultipleMeltPeaks            |
| folA       | 25B | 33.65 | 81.58 | 1.94 |                              |
| fosB       | 25B |       |       |      | CurveFitFailed               |
| fosX       | 25B |       |       |      | LowEfficiency, CtIsSmall, Ci |
| fox5       | 25B | 27.22 | 86.45 | 1.97 |                              |
| imiR       | 25B |       |       |      | CurveFitFailed               |
| ImrA-01    | 25B | 36.15 | 82.4  | 1.93 |                              |
| intl       | 25B | 28.32 | 84.67 | 1.95 |                              |
| intl1      | 25B | 20.52 | 87.02 | 2.02 |                              |
| IS613      | 25B | 24.79 | 79.5  | 2.13 |                              |
| lnuA-01    | 25B | 27.12 | 73.66 | 2.08 |                              |
| lnuB-01    | 25B |       |       |      | LowEfficiency, CtIsSmall, Ci |
| lnuB-02    | 25B |       |       |      | LowEfficiency, CtIsSmall, Ci |

|                |     |       |       |      |                              |
|----------------|-----|-------|-------|------|------------------------------|
| lnuC           | 25B | 35.6  | 87.4  | 1.77 | MultipleMeltPeaks            |
| marR-01        | 25B | 31.84 | 90.33 | 1.92 |                              |
| matA/mel       | 25B | 19.37 | 77.52 | 2.15 |                              |
| mdet1          | 25B |       |       |      | LowEfficiency, CtIsSmall, Ci |
| mdtA           | 25B | 36.72 | 81.78 | 1.79 |                              |
| mdtE/yhiU      | 25B | 27.89 | 80.92 | 1.97 |                              |
| mecA           | 25B |       |       |      | LowEfficiency, CtIsSmall, S: |
| mefA           | 25B | 18.6  | 80.36 | 2.06 |                              |
| mepA           | 25B | 31.49 | 87.58 | 2.04 |                              |
| mexA           | 25B | 34.18 | 87.22 | 1.88 |                              |
| mexD           | 25B | 33.5  | 79.96 | 2.06 |                              |
| mexE           | 25B |       |       |      | BadR2, LowEfficiency, CtIsS  |
| mexF           | 25B | 27.25 | 81.23 | 1.71 | MultipleMeltPeaks            |
| mphA-01        | 25B | 29.6  | 89.03 | 1.98 | MultipleMeltPeaks            |
| mphA-02        | 25B | 28.82 | 86.72 | 1.52 | MultipleMeltPeaks            |
| mphB           | 25B |       |       |      | CurveFitFailed               |
| mphC           | 25B | 33.92 | 85.93 | 1.88 |                              |
| msrA-01        | 25B |       |       |      | LowEfficiency, CtIsSmall, Ci |
| msrC-01        | 25B |       |       |      | NoAmplification              |
| mtrC-01        | 25B | 35.95 | 89.84 | 1.85 | MultipleMeltPeaks            |
| mtrC-02        | 25B |       |       |      | BadR2, LowEfficiency, CtIsS  |
| mtrD-02        | 25B | 17.7  | 80.29 | 2.09 |                              |
| mtrD-03        | 25B | 17.61 | 80.83 | 1.85 |                              |
| NDM1           | 25B | 35.93 | 85.1  | 1.81 |                              |
| nimE           | 25B |       |       |      | CurveFitFailed               |
| nisB           | 25B | 30.61 | 76.87 | 1.95 |                              |
| oleC           | 25B | 37.45 | 89.8  | 1.8  |                              |
| oprD           | 25B | 27.68 | 88.77 | 2.08 |                              |
| oprJ           | 25B | 33.64 | 88.24 | 1.81 | MultipleMeltPeaks            |
| pbp            | 25B |       |       |      | LowEfficiency, CtIsSmall, S: |
| pbp2x          | 25B | 17.43 | 75.67 | 2.01 |                              |
| Pbp5           | 25B |       |       |      | CurveFitFailed               |
| penA           | 25B | 17.21 | 80.9  | 1.98 |                              |
| pikR1          | 25B |       |       |      | CurveFitFailed               |
| pikR2          | 25B | 29.25 | 85.74 | 1.92 | MultipleMeltPeaks            |
| pmrA           | 25B | 17.71 | 79.85 | 2.13 |                              |
| pncA           | 25B | 29.72 | 86.11 | 1.89 |                              |
| putative multi | 25B | 36.38 | 76.81 | 1.87 | MultipleMeltPeaks            |
| qac            | 25B | 34.48 | 83.56 | 1.99 |                              |
| qacA           | 25B |       |       |      | LowEfficiency, CtIsSmall, Ci |
| qacA/qacB      | 25B |       |       |      | CurveFitFailed               |
| qacEdelta1-0   | 25B | 29.18 | 78.95 | 1.91 |                              |
| qacEdelta1-0   | 25B | 32.13 | 80.9  | 1.86 | MultipleMeltPeaks            |
| qacH-01        | 25B | 32.54 | 86.19 | 2.02 |                              |
| qacH-02        | 25B | 29.22 | 78.89 | 1.95 |                              |
| qnrA           | 25B | 34.84 | 85.63 | 1.94 |                              |



|              |     |       |       |      |                              |
|--------------|-----|-------|-------|------|------------------------------|
| rarD-02      | 25B | 28.47 | 79.84 | 1.57 |                              |
| sat4         | 25B |       |       |      | LowEfficiency, CtIsSmall, Ci |
| sdeB         | 25B | 36.85 | 77.17 | 1.94 |                              |
| spcN-01      | 25B |       |       |      | CurveFitFailed               |
| speA         | 25B |       |       |      | NoAmplification              |
| str          | 25B |       |       |      | LowEfficiency, CtIsSmall, Ci |
| strA         | 25B |       |       |      | LowEfficiency, CtIsSmall, Ci |
| strB         | 25B | 36.62 | 78.48 | 1.97 | MultipleMeltPeaks            |
| sul1         | 25B | 33.64 | 89.56 | 1.82 |                              |
| sul2         | 25B |       |       |      | LowEfficiency, CtIsSmall, S: |
| sulA/foIP-01 | 25B | 16.87 | 80.82 | 2.02 |                              |
| sulA/foIP-03 | 25B | 17.18 | 83.74 | 2.05 |                              |
| tet(32)      | 25B | 27.21 | 81.1  | 1.96 |                              |
| tet(34)      | 25B | 30.94 | 75.61 | 2.01 |                              |
| tet(35)      | 25B |       |       |      | NoAmplification              |
| tet(36)-A    | 25B |       |       |      | LowEfficiency, CtIsSmall, S: |
| tet(36)-B    | 25B |       |       |      | LowEfficiency, CtIsSmall, Ci |
| tet(37)      | 25B | 29.57 | 90.96 | 1.96 | MultipleMeltPeaks            |
| tetA-01      | 25B | 31.97 | 84.92 | 1.98 |                              |
| tetA-02      | 25B | 33.04 | 87.43 | 1.92 |                              |
| tetB-01      | 25B | 31.31 | 86.05 | 1.99 |                              |
| tetB-02      | 25B |       |       |      | CurveFitFailed               |
| tetC-01      | 25B |       |       |      | NoAmplification              |
| tetC-02      | 25B |       |       |      | CurveFitFailed               |
| tetD-01      | 25B |       |       |      | LowEfficiency, CtIsSmall, S: |
| tetD-02      | 25B | 34.92 | 76.29 | 1.92 | MultipleMeltPeaks            |
| tetE         | 25B |       |       |      | BadR2, LowEfficiency, CtIsS  |
| tetG-01      | 25B | 34.98 | 82.3  | 1.93 |                              |
| tetG-02      | 25B | 32.04 | 88.08 | 1.94 | MultipleMeltPeaks            |
| tetH         | 25B |       |       |      | LowEfficiency, CtIsSmall, Ci |
| tetJ         | 25B |       |       |      | LowEfficiency, CtIsSmall, Ci |
| tetK         | 25B |       |       |      | LowEfficiency, CtIsSmall, Ci |
| tetL-01      | 25B |       |       |      | CurveFitFailed               |
| tetL-02      | 25B | 28.5  | 78.49 | 1.98 | MultipleMeltPeaks            |
| tetM-01      | 25B | 21.24 | 75.97 | 2.01 |                              |
| tetM-02      | 25B | 21.84 | 77.64 | 2.05 |                              |
| tetO-01      | 25B |       |       |      | LowEfficiency, CtIsSmall, S: |
| tetPA        | 25B |       |       |      | LowEfficiency, CtIsSmall, Ci |
| tetPB-01     | 25B | 36.55 | 79.86 | 1.94 |                              |
| tetPB-02     | 25B | 27.55 | 84.82 | 2.07 |                              |
| tetPB-03     | 25B |       |       |      | LowEfficiency, CtIsSmall, S: |
| tetPB-05     | 25B |       |       |      | LowEfficiency, CtIsSmall, Ci |
| tetQ         | 25B | 28.69 | 76.5  | 2.05 |                              |
| tetR-02      | 25B | 28.89 | 85.28 | 1.9  |                              |
| tetR-03      | 25B |       |       |      | LowEfficiency, CtIsSmall, Ci |
| tetS         | 25B | 32.06 | 89.4  | 2.2  | MultipleMeltPeaks            |

|             |     |       |       |      |                              |
|-------------|-----|-------|-------|------|------------------------------|
| tetT        | 25B | 36.12 | 76.84 | 1.85 |                              |
| tetU-01     | 25B |       |       |      | LowEfficiency, CtIsSmall, Ci |
| tetV        | 25B |       |       |      | CurveFitFailed               |
| tetW-01     | 25B | 25.89 | 81.86 | 2    |                              |
| tetX        | 25B |       |       |      | LowEfficiency, CtIsSmall, Ci |
| tnpA-01     | 25B |       |       |      | LowEfficiency, CtIsSmall, S: |
| tnpA-02     | 25B | 29.58 | 84.9  | 1.78 |                              |
| tnpA-03     | 25B | 27.73 | 77.73 | 1.99 |                              |
| tnpA-04     | 25B | 25.27 | 82.52 | 1.94 |                              |
| tnpA-05     | 25B | 29.28 | 80.36 | 1.88 |                              |
| tnpA-07     | 25B |       |       |      | LowEfficiency, CtIsSmall, Ci |
| tolC-01     | 25B | 28.92 | 78.41 | 1.94 |                              |
| tolC-02     | 25B | 28.47 | 87.02 | 1.99 | MultipleMeltPeaks            |
| tolC-03     | 25B | 30.52 | 79.49 | 1.9  | MultipleMeltPeaks            |
| Tp614       | 25B | 31.77 | 74.82 | 1.97 | MultipleMeltPeaks            |
| ttgA        | 25B | 35.3  | 83.62 | 1.85 |                              |
| ttgB        | 25B |       |       |      | LowEfficiency, CtIsSmall, Ci |
| vanA        | 25B |       |       |      | LowEfficiency, CtIsSmall, Ci |
| vanB-01     | 25B | 32.35 | 87.23 | 2.01 |                              |
| vanC-01     | 25B |       |       |      | CurveFitFailed               |
| vanC-02     | 25B |       |       |      | CurveFitFailed               |
| vanC-03     | 25B | 26.2  | 85.98 | 1.98 | MultipleMeltPeaks            |
| vanC1       | 25B | 35.06 | 79.32 | 1.91 |                              |
| vanC2/vanC3 | 25B | 33.43 | 83.17 | 2.2  | MultipleMeltPeaks            |
| vanG        | 25B |       |       |      | LowEfficiency, CtIsSmall, Ci |
| vanHB       | 25B | 33.16 | 89.84 | 1.96 |                              |
| vanHD       | 25B | 35.96 | 83.45 | 1.86 |                              |
| vanRA-01    | 25B |       |       |      | NoAmplification              |
| vanRA-02    | 25B |       |       |      | LowEfficiency, CtIsSmall, Ci |
| vanRB       | 25B | 34.61 | 81.5  | 1.87 | MultipleMeltPeaks            |
| vanRC       | 25B |       |       |      | LowEfficiency, CtIsSmall, Ci |
| vanRC4      | 25B |       |       |      | LowEfficiency, CtIsSmall, Ci |
| vanRD       | 25B |       |       |      | LowEfficiency, CtIsSmall, Ci |
| vanSA       | 25B |       |       |      | LowEfficiency, CtIsSmall, S: |
| vanSB       | 25B | 30.38 | 74.49 | 1.99 |                              |
| vanSC-01    | 25B | 34.93 | 84.04 | 1.99 |                              |
| vanSC-02    | 25B |       |       |      | NoAmplification              |
| vanTC-01    | 25B |       |       |      | CurveFitFailed               |
| vanTC-02    | 25B | 32.53 | 84.28 | 1.97 |                              |
| vanTE       | 25B | 33.81 | 88.3  | 1.9  |                              |
| vanTG       | 25B | 33.34 | 74.73 | 2.01 |                              |
| vanWB       | 25B |       |       |      | CurveFitFailed               |
| vanWG       | 25B |       |       |      | CurveFitFailed               |
| vanXA       | 25B |       |       |      | CurveFitFailed               |
| vanXB       | 25B |       |       |      | LowEfficiency, CtIsSmall, Ci |
| vanXD       | 25B | 31.59 | 75.5  | 2.05 |                              |

|              |     |       |       |      |                              |
|--------------|-----|-------|-------|------|------------------------------|
| vanYB        | 25B | 37.16 | 82.26 | 1.89 |                              |
| vanYD-01     | 25B | 33.31 | 82.26 | 1.9  |                              |
| vanYD-02     | 25B |       |       |      | CurveFitFailed               |
| vatB-01      | 25B | 35.19 | 79.11 | 1.98 |                              |
| vatB-02      | 25B |       |       |      | CurveFitFailed               |
| vatC-01      | 25B | 36.64 | 81.17 | 1.86 |                              |
| vatC-02      | 25B |       |       |      | CurveFitFailed               |
| vatE-01      | 25B | 29.75 | 76.23 | 2.13 |                              |
| vatE-02      | 25B |       |       |      | CurveFitFailed               |
| vgaA-01      | 25B |       |       |      | CurveFitFailed               |
| vgaA-02      | 25B |       |       |      | CurveFitFailed               |
| vgb-01       | 25B | 31.03 | 89.2  | 1.91 | MultipleMeltPeaks            |
| vgbB-01      | 25B |       |       |      | CurveFitFailed               |
| vgbB-02      | 25B |       |       |      | LowEfficiency, CtIsSmall, Ci |
| yceE/mdtG-0  | 25B | 28.53 | 80.64 | 1.96 |                              |
| yceE/mdtG-0  | 25B |       |       |      | NoAmplification              |
| yceL/mdtH-0  | 25B | 29.81 | 87.62 | 2    |                              |
| yceL/mdtH-0  | 25B |       |       |      | LowEfficiency, CtIsSmall, Ci |
| yceL/mdtH-0  | 25B | 28.96 | 79.6  | 1.94 | MultipleMeltPeaks            |
| yidY/mdtL-01 | 25B | 30.37 | 83.39 | 1.83 |                              |
| yidY/mdtL-02 | 25B | 28.96 | 79.81 | 1.96 |                              |































| Assay          | Sample | Ct | Tm    | Efficiency | flag                         |
|----------------|--------|----|-------|------------|------------------------------|
| 16S rRNA       | 25C    |    | 12.74 | 82.42      | 1.9                          |
| aac            | 25C    |    | 34.59 | 78.38      | 1.59 MultipleMeltPeaks       |
| aac(6')-Ib(akε | 25C    |    |       |            | NoAmplification              |
| aac(6')-Ib(akε | 25C    |    | 37.61 | 82.25      | 1.86                         |
| aac(6')-Ib(akε | 25C    |    | 40.65 | 87.31      | 1.65 MultipleMeltPeaks       |
| aac(6')-II     | 25C    |    |       |            | NoAmplification              |
| aac(6')I1      | 25C    |    |       |            | NoAmplification              |
| aacA/aphD      | 25C    |    |       |            | LowEfficiency, CtIsSmall, Ci |
| aacC           | 25C    |    | 32.21 | 88.59      | 1.89                         |
| aacC1          | 25C    |    |       |            | NoAmplification              |
| aacC2          | 25C    |    |       |            | NoAmplification              |
| aacC4          | 25C    |    |       |            | NoAmplification              |
| aadA-01        | 25C    |    |       |            | CurveFitFailed               |
| aadA-02        | 25C    |    |       |            | NoAmplification              |
| aadA-1-01      | 25C    |    |       |            | NoAmplification              |
| aadA-1-02      | 25C    |    |       |            | NoAmplification              |
| aadA1          | 25C    |    |       |            | CurveFitFailed               |
| aadA2-01       | 25C    |    |       |            | CtIsLarge, CurveFitFailed    |
| aadA2-02       | 25C    |    |       |            | NoAmplification              |
| aadA2-03       | 25C    |    |       |            | NoAmplification              |
| aadA5-01       | 25C    |    | 32.31 | 84.78      | 1.96                         |
| aadA5-02       | 25C    |    | 38.93 | 85.47      | 1.79 MultipleMeltPeaks       |
| aadA9-01       | 25C    |    |       |            | LowEfficiency, CtIsSmall, Ci |
| aadA9-02       | 25C    |    |       |            | NoAmplification              |
| aadD           | 25C    |    |       |            | NoAmplification              |
| aadE           | 25C    |    |       |            | NoAmplification              |
| acrA-01        | 25C    |    | 33.14 | 79.85      | 1.92 MultipleMeltPeaks       |
| acrA-02        | 25C    |    | 28.1  | 82.06      | 1.86                         |
| acrA-03        | 25C    |    |       |            | CurveFitFailed               |
| acrA-04        | 25C    |    | 32.32 | 85.21      | 1.92 MultipleMeltPeaks       |
| acrA-05        | 25C    |    | 29.44 | 88.43      | 1.92                         |
| acrB-01        | 25C    |    | 32.33 | 81.52      | 1.96                         |
| acrF           | 25C    |    |       |            | NoAmplification              |
| acrR-01        | 25C    |    | 29.92 | 79.23      | 1.91                         |
| acrR-02        | 25C    |    |       |            | NoAmplification              |
| Actin          | 25C    |    | 22.25 | 87.2       | 1.92                         |
| adeA           | 25C    |    |       |            | NoAmplification              |
| ampC-01        | 25C    |    | 32.43 | 80.67      | 1.93                         |
| ampC-02        | 25C    |    | 36.33 | 89.13      | 1.92                         |
| ampC-04        | 25C    |    | 33.77 | 78.19      | 1.92                         |
| ampC-05        | 25C    |    |       |            | NoAmplification              |
| ampC-06        | 25C    |    |       |            | NoAmplification              |
| ampC-07        | 25C    |    |       |            | NoAmplification              |
| ampC-09        | 25C    |    |       |            | NoAmplification              |
| ampC/blaDH     | 25C    |    | 34.03 | 81.05      | 1.95 MultipleMeltPeaks       |

|               |     |       |       |      |                              |
|---------------|-----|-------|-------|------|------------------------------|
| aph           | 25C |       |       |      | NoAmplification              |
| aph(2')-Id-01 | 25C |       |       |      | LowEfficiency, CtIsSmall, S: |
| aph(2')-Id-02 | 25C |       |       |      | NoAmplification              |
| aph6ia        | 25C |       |       |      | NoAmplification              |
| aphA1(aka k   | 25C | 28.47 | 76.34 | 2.07 |                              |
| bacA-01       | 25C |       |       |      | NoAmplification              |
| bacA-02       | 25C |       |       |      | CurveFitFailed               |
| BETA-globin   | 25C | 23.74 | 84.13 | 1.99 |                              |
| bla-ACC-1     | 25C | 36.1  | 85.88 | 1.79 |                              |
| bla-L1        | 25C | 32.26 | 82.19 | 1.92 |                              |
| bla1          | 25C |       |       |      | LowEfficiency, CtIsSmall, S: |
| blaCMY        | 25C | 33.06 | 80.6  | 1.9  |                              |
| blaCMY2-01    | 25C |       |       |      | NoAmplification              |
| blaCMY2-02    | 25C | 31.13 | 89.59 | 1.95 | MultipleMeltPeaks            |
| blaCTX-M-01   | 25C | 38.63 | 87.59 | 1.79 | MultipleMeltPeaks            |
| blaCTX-M-02   | 25C |       |       |      | NoAmplification              |
| blaCTX-M-03   | 25C |       |       |      | BadR2, LowEfficiency, CtIsS  |
| blaCTX-M-04   | 25C | 32.52 | 88.03 | 1.9  | MultipleMeltPeaks            |
| blaCTX-M-05   | 25C | 34.67 | 76.12 | 1.75 |                              |
| blaCTX-M-06   | 25C |       |       |      | NoAmplification              |
| blaGES        | 25C |       |       |      | NoAmplification              |
| blaIMP-01     | 25C |       |       |      | NoAmplification              |
| blaIMP-02     | 25C |       |       |      | NoAmplification              |
| blaMOX/blaC   | 25C |       |       |      | NoAmplification              |
| blaOCH        | 25C |       |       |      | NoAmplification              |
| blaOKP        | 25C |       |       |      | NoAmplification              |
| blaOXA1/blaC  | 25C |       |       |      | LowEfficiency, CtIsSmall, S: |
| blaOXA10-01   | 25C |       |       |      | NoAmplification              |
| blaOXA10-02   | 25C |       |       |      | CurveFitFailed               |
| blaOXY        | 25C |       |       |      | CtIsLarge, CurveFitFailed    |
| blaPAO        | 25C | 36.67 | 84.61 | 1.83 |                              |
| blaPER        | 25C |       |       |      | NoAmplification              |
| blaPSE        | 25C |       |       |      | NoAmplification              |
| blaROB        | 25C |       |       |      | NoAmplification              |
| blaSFO        | 25C | 35.62 | 80.41 | 1.94 |                              |
| blaSHV-01     | 25C | 32.26 | 85.13 | 1.64 |                              |
| blaSHV-02     | 25C |       |       |      | CurveFitFailed               |
| blaTEM        | 25C | 32.1  | 79.15 | 1.7  |                              |
| blaTLA        | 25C |       |       |      | LowEfficiency, CtIsSmall, C: |
| blaVEB        | 25C |       |       |      | NoAmplification              |
| blaVIM        | 25C |       |       |      | CtIsLarge, CurveFitFailed    |
| blaZ          | 25C |       |       |      | NoAmplification              |
| carB          | 25C |       |       |      | NoAmplification              |
| catA1         | 25C |       |       |      | NoAmplification              |
| catB3         | 25C |       |       |      | NoAmplification              |
| catB8         | 25C | 36.56 | 81.07 | 1.84 |                              |

|            |     |       |       |      |                              |
|------------|-----|-------|-------|------|------------------------------|
| ceoA       | 25C | 29.58 | 87.3  | 1.94 | MultipleMeltPeaks            |
| cepA       | 25C |       |       |      | NoAmplification              |
| cfiA       | 25C |       |       |      | NoAmplification              |
| cfr        | 25C |       |       |      | LowEfficiency, CtIsSmall, S: |
| cfxA       | 25C | 19.94 | 77.59 | 2.03 |                              |
| cmeA       | 25C |       |       |      | LowEfficiency, CtIsSmall, S: |
| cmlA1-01   | 25C | 41.98 | 87.26 | 1.78 | MultipleMeltPeaks            |
| cmlA1-02   | 25C | 41.71 | 88.85 | 1.66 | MultipleMeltPeaks            |
| cmr        | 25C |       |       |      | NoAmplification              |
| cmx(A)     | 25C | 36.05 | 83.93 | 1.94 |                              |
| cphA-01    | 25C | 34.71 | 87.5  | 1.87 | MultipleMeltPeaks            |
| cphA-02    | 25C |       |       |      | CurveFitFailed               |
| dfrA1      | 25C |       |       |      | NoAmplification              |
| dfrA12     | 25C |       |       |      | CurveFitFailed               |
| emrD       | 25C |       |       |      | NoAmplification              |
| ereA       | 25C |       |       |      | NoAmplification              |
| ereB       | 25C | 37.55 | 80.05 | 1.88 |                              |
| erm(34)    | 25C |       |       |      | NoAmplification              |
| erm(35)    | 25C |       |       |      | LowEfficiency, CtIsSmall, C: |
| erm(36)    | 25C | 35.42 | 82.67 | 2    | MultipleMeltPeaks            |
| ermA       | 25C |       |       |      | CurveFitFailed               |
| ermA/ermTR | 25C |       |       |      | NoAmplification              |
| ermB       | 25C | 25.59 | 74.92 | 2.09 |                              |
| ermC       | 25C |       |       |      | LowEfficiency, CtIsSmall, C: |
| ermF       | 25C |       |       |      | LowEfficiency, CtIsSmall, S: |
| ermJ/ermD  | 25C |       |       |      | NoAmplification              |
| ermK-01    | 25C |       |       |      | LowEfficiency, CtIsSmall, C: |
| ermK-02    | 25C | 37.04 | 83.21 | 1.91 |                              |
| ermT-01    | 25C |       |       |      | NoAmplification              |
| ermT-02    | 25C |       |       |      | NoAmplification              |
| ermX       | 25C |       |       |      | CurveFitFailed               |
| ermY       | 25C |       |       |      | NoAmplification              |
| fabK       | 25C | 23.88 | 79.13 | 1.92 |                              |
| floR       | 25C |       |       |      | NoAmplification              |
| folA       | 25C | 32.65 | 79.88 | 1.94 |                              |
| fosB       | 25C |       |       |      | LowEfficiency, CtIsSmall, S: |
| fosX       | 25C |       |       |      | NoAmplification              |
| fox5       | 25C | 32.76 | 86.25 | 1.84 |                              |
| imiR       | 25C |       |       |      | NoAmplification              |
| ImrA-01    | 25C |       |       |      | NoAmplification              |
| intl       | 25C | 35.58 | 85.08 | 1.88 |                              |
| intl1      | 25C | 24.42 | 84.01 | 1.94 |                              |
| IS613      | 25C | 22.78 | 79.52 | 2.05 |                              |
| lnuA-01    | 25C | 28.68 | 73.67 | 1.9  |                              |
| lnuB-01    | 25C |       |       |      | NoAmplification              |
| lnuB-02    | 25C |       |       |      | NoAmplification              |

|                |     |       |       |      |                              |
|----------------|-----|-------|-------|------|------------------------------|
| lnuC           | 25C | 40.15 | 73.8  | 1.79 |                              |
| marR-01        | 25C | 35.79 | 83.1  | 1.82 | MultipleMeltPeaks            |
| matA/mel       | 25C | 18.84 | 77.51 | 2.04 |                              |
| mdet1          | 25C |       |       |      | NoAmplification              |
| mdtA           | 25C |       |       |      | NoAmplification              |
| mdtE/yhiU      | 25C | 31.25 | 83.96 | 1.93 |                              |
| mecA           | 25C |       |       |      | NoAmplification              |
| mefA           | 25C | 18.27 | 80.35 | 2.01 | MultipleMeltPeaks            |
| mepA           | 25C | 32.88 | 84.35 | 1.94 |                              |
| mexA           | 25C |       |       |      | CurveFitFailed               |
| mexD           | 25C |       |       |      | NoAmplification              |
| mexE           | 25C |       |       |      | NoAmplification              |
| mexF           | 25C | 26.49 | 81.45 | 1.71 |                              |
| mphA-01        | 25C | 29.94 | 89.21 | 2    |                              |
| mphA-02        | 25C | 33.98 | 83.98 | 1.56 | MultipleMeltPeaks            |
| mphB           | 25C |       |       |      | CurveFitFailed               |
| mphC           | 25C |       |       |      | NoAmplification              |
| msrA-01        | 25C |       |       |      | NoAmplification              |
| msrC-01        | 25C |       |       |      | NoAmplification              |
| mtrC-01        | 25C | 36.43 | 83.68 | 1.88 | MultipleMeltPeaks            |
| mtrC-02        | 25C |       |       |      | NoAmplification              |
| mtrD-02        | 25C | 29.97 | 81.23 | 1.96 |                              |
| mtrD-03        | 25C | 37.47 | 82.07 | 1.69 |                              |
| NDM1           | 25C |       |       |      | NoAmplification              |
| nimE           | 25C |       |       |      | NoAmplification              |
| nisB           | 25C |       |       |      | NoAmplification              |
| oleC           | 25C | 34.45 | 89.93 | 1.9  |                              |
| oprD           | 25C | 33.78 | 89.27 | 1.95 | MultipleMeltPeaks            |
| oprJ           | 25C | 32.5  | 85.6  | 1.76 | MultipleMeltPeaks            |
| pbp            | 25C |       |       |      | LowEfficiency, CtIsSmall, S: |
| pbp2x          | 25C |       |       |      | NoAmplification              |
| Pbp5           | 25C |       |       |      | NoAmplification              |
| penA           | 25C |       |       |      | NoAmplification              |
| pikR1          | 25C | 37.73 | 73.83 | 1.9  |                              |
| pikR2          | 25C | 36.78 | 89.75 | 1.8  | MultipleMeltPeaks            |
| pmrA           | 25C | 19.57 | 79.16 | 2.02 |                              |
| pncA           | 25C | 34.38 | 89.25 | 1.98 |                              |
| putative multi | 25C |       |       |      | NoAmplification              |
| qac            | 25C |       |       |      | LowEfficiency, CtIsSmall, S: |
| qacA           | 25C | 36.13 | 70    | 1.77 |                              |
| qacA/qacB      | 25C |       |       |      | NoAmplification              |
| qacEdelta1-0   | 25C |       |       |      | NoAmplification              |
| qacEdelta1-0   | 25C |       |       |      | CurveFitFailed               |
| qacH-01        | 25C |       |       |      | NoAmplification              |
| qacH-02        | 25C |       |       |      | NoAmplification              |
| qnrA           | 25C | 28.95 | 83.05 | 2    |                              |

|              |     |       |       |      |                              |
|--------------|-----|-------|-------|------|------------------------------|
| rarD-02      | 25C |       |       |      | NoAmplification              |
| sat4         | 25C |       |       |      | LowEfficiency, CtIsSmall, S: |
| sdeB         | 25C |       |       |      | LowEfficiency, CtIsSmall, Ci |
| spcN-01      | 25C |       |       |      | NoAmplification              |
| speA         | 25C |       |       |      | NoAmplification              |
| str          | 25C |       |       |      | NoAmplification              |
| strA         | 25C |       |       |      | LowEfficiency, CtIsSmall, Ci |
| strB         | 25C | 29.49 | 83.71 | 1.91 |                              |
| sul1         | 25C |       |       |      | NoAmplification              |
| sul2         | 25C |       |       |      | CurveFitFailed               |
| sulA/foIP-01 | 25C | 18.94 | 81.36 | 1.99 |                              |
| sulA/foIP-03 | 25C | 18.87 | 84.12 | 2.02 |                              |
| tet(32)      | 25C | 25.96 | 81.14 | 1.99 |                              |
| tet(34)      | 25C | 29.21 | 75.95 | 2    |                              |
| tet(35)      | 25C |       |       |      | NoAmplification              |
| tet(36)-A    | 25C |       |       |      | NoAmplification              |
| tet(36)-B    | 25C |       |       |      | NoAmplification              |
| tet(37)      | 25C | 36.51 | 89.27 | 1.83 | MultipleMeltPeaks            |
| tetA-01      | 25C | 36.15 | 84.99 | 1.87 |                              |
| tetA-02      | 25C |       |       |      | CurveFitFailed               |
| tetB-01      | 25C |       |       |      | NoAmplification              |
| tetB-02      | 25C |       |       |      | CtIsLarge, CurveFitFailed    |
| tetC-01      | 25C |       |       |      | NoAmplification              |
| tetC-02      | 25C |       |       |      | CtIsLarge, CurveFitFailed    |
| tetD-01      | 25C |       |       |      | NoAmplification              |
| tetD-02      | 25C | 35.78 | 76.3  | 1.78 |                              |
| tetE         | 25C |       |       |      | NoAmplification              |
| tetG-01      | 25C | 42.06 | 85.51 | 1.69 | MultipleMeltPeaks            |
| tetG-02      | 25C | 34.41 | 83.82 | 1.86 | MultipleMeltPeaks            |
| tetH         | 25C |       |       |      | NoAmplification              |
| tetJ         | 25C |       |       |      | NoAmplification              |
| tetK         | 25C |       |       |      | LowEfficiency, CtIsSmall, Ci |
| tetL-01      | 25C |       |       |      | NoAmplification              |
| tetL-02      | 25C | 28.48 | 78.81 | 2.02 |                              |
| tetM-01      | 25C | 14.91 | 76    | 2.05 |                              |
| tetM-02      | 25C | 14.9  | 77.51 | 2.08 |                              |
| tetO-01      | 25C |       |       |      | CurveFitFailed               |
| tetPA        | 25C |       |       |      | NoAmplification              |
| tetPB-01     | 25C | 41.64 | 63.1  | 1.7  | MultipleMeltPeaks            |
| tetPB-02     | 25C | 34.32 | 84.85 | 1.96 |                              |
| tetPB-03     | 25C |       |       |      | CurveFitFailed               |
| tetPB-05     | 25C |       |       |      | LowEfficiency, CtIsSmall, S: |
| tetQ         | 25C | 24.89 | 75.94 | 2.04 |                              |
| tetR-02      | 25C | 32.02 | 80.29 | 1.8  |                              |
| tetR-03      | 25C |       |       |      | NoAmplification              |
| tetS         | 25C |       |       |      | NoAmplification              |

|             |     |       |       |      |                                          |
|-------------|-----|-------|-------|------|------------------------------------------|
| tetT        | 25C | 42.8  | 62.02 | 1.86 | MultipleMeltPeaks                        |
| tetU-01     | 25C |       |       |      | NoAmplification                          |
| tetV        | 25C |       |       |      | CurveFitFailed                           |
| tetW-01     | 25C | 21.63 | 81.99 | 1.99 |                                          |
| tetX        | 25C |       |       |      | LowEfficiency, CtIsSmall, Ci             |
| tnpA-01     | 25C |       |       |      | LowEfficiency, CtIsSmall, S <sub>e</sub> |
| tnpA-02     | 25C | 29.53 | 84.87 | 1.79 |                                          |
| tnpA-03     | 25C | 25.93 | 77.82 | 1.98 |                                          |
| tnpA-04     | 25C | 28.3  | 82.37 | 1.91 |                                          |
| tnpA-05     | 25C | 26.33 | 80.83 | 1.91 |                                          |
| tnpA-07     | 25C |       |       |      | NoAmplification                          |
| tolC-01     | 25C | 28.59 | 78.26 | 1.83 |                                          |
| tolC-02     | 25C | 31.3  | 83.52 | 1.72 |                                          |
| tolC-03     | 25C |       |       |      | NoAmplification                          |
| Tp614       | 25C |       |       |      | NoAmplification                          |
| ttgA        | 25C |       |       |      | NoAmplification                          |
| ttgB        | 25C |       |       |      | NoAmplification                          |
| vanA        | 25C |       |       |      | NoAmplification                          |
| vanB-01     | 25C |       |       |      | CurveFitFailed                           |
| vanC-01     | 25C |       |       |      | NoAmplification                          |
| vanC-02     | 25C |       |       |      | NoAmplification                          |
| vanC-03     | 25C | 28.69 | 91.44 | 1.97 |                                          |
| vanC1       | 25C |       |       |      | NoAmplification                          |
| vanC2/vanC3 | 25C | 36.46 | 77.45 | 1.86 | MultipleMeltPeaks                        |
| vanG        | 25C |       |       |      | NoAmplification                          |
| vanHB       | 25C | 33.31 | 80    | 1.95 |                                          |
| vanHD       | 25C |       |       |      | CurveFitFailed                           |
| vanRA-01    | 25C |       |       |      | NoAmplification                          |
| vanRA-02    | 25C |       |       |      | NoAmplification                          |
| vanRB       | 25C |       |       |      | NoAmplification                          |
| vanRC       | 25C |       |       |      | LowEfficiency, CtIsSmall, Ci             |
| vanRC4      | 25C |       |       |      | NoAmplification                          |
| vanRD       | 25C |       |       |      | NoAmplification                          |
| vanSA       | 25C |       |       |      | LowEfficiency, CtIsSmall, Ci             |
| vanSB       | 25C | 37.99 | 72.97 | 1.52 | MultipleMeltPeaks                        |
| vanSC-01    | 25C | 38.75 | 83.03 | 1.81 |                                          |
| vanSC-02    | 25C |       |       |      | NoAmplification                          |
| vanTC-01    | 25C |       |       |      | CurveFitFailed                           |
| vanTC-02    | 25C | 35.35 | 84.61 | 1.88 | MultipleMeltPeaks                        |
| vanTE       | 25C |       |       |      | NoAmplification                          |
| vanTG       | 25C |       |       |      | NoAmplification                          |
| vanWB       | 25C |       |       |      | NoAmplification                          |
| vanWG       | 25C | 37.96 | 73.88 | 1.89 |                                          |
| vanXA       | 25C |       |       |      | CurveFitFailed                           |
| vanXB       | 25C |       |       |      | NoAmplification                          |
| vanXD       | 25C | 31.65 | 75.5  | 2.03 |                                          |

|              |     |       |       |      |                              |
|--------------|-----|-------|-------|------|------------------------------|
| vanYB        | 25C |       |       |      | LowEfficiency, CtIsSmall, S: |
| vanYD-01     | 25C | 33.31 | 88.74 | 1.9  |                              |
| vanYD-02     | 25C |       |       |      | NoAmplification              |
| vatB-01      | 25C |       |       |      | NoAmplification              |
| vatB-02      | 25C |       |       |      | LowEfficiency, CtIsSmall, S: |
| vatC-01      | 25C |       |       |      | CtIsLarge, CurveFitFailed    |
| vatC-02      | 25C |       |       |      | CurveFitFailed               |
| vatE-01      | 25C | 32.56 | 75.56 | 2.02 |                              |
| vatE-02      | 25C |       |       |      | NoAmplification              |
| vgaA-01      | 25C |       |       |      | NoAmplification              |
| vgaA-02      | 25C |       |       |      | LowEfficiency, CtIsSmall, S: |
| vgb-01       | 25C |       |       |      | NoAmplification              |
| vgbB-01      | 25C |       |       |      | NoAmplification              |
| vgbB-02      | 25C |       |       |      | NoAmplification              |
| yceE/mdtG-0  | 25C |       |       |      | CurveFitFailed               |
| yceE/mdtG-0  | 25C |       |       |      | NoAmplification              |
| yceL/mdtH-0  | 25C | 32.44 | 87.77 | 1.82 | MultipleMeltPeaks            |
| yceL/mdtH-0  | 25C |       |       |      | NoAmplification              |
| yceL/mdtH-0  | 25C |       |       |      | CurveFitFailed               |
| yidY/mdtL-01 | 25C | 27.65 | 83.32 | 1.91 |                              |
| yidY/mdtL-02 | 25C | 34.77 | 77.27 | 1.97 |                              |































| Assay          | Sample | Ct | Tm    | Efficiency | flag                        |
|----------------|--------|----|-------|------------|-----------------------------|
| 16S rRNA       | 26A    |    | 18.63 | 82.21      | 2.05                        |
| aac            | 26A    |    | 33.29 | 80.91      | 2 MultipleMeltPeaks         |
| aac(6')-Ib(akz | 26A    |    |       |            | NoAmplification             |
| aac(6')-Ib(akz | 26A    |    | 30.99 | 82.2       | 1.97                        |
| aac(6')-Ib(akz | 26A    |    | 33.15 | 77.95      | 1.94 MultipleMeltPeaks      |
| aac(6')-II     | 26A    |    | 39.01 | 81.2       | 1.58 MultipleMeltPeaks      |
| aac(6')I1      | 26A    |    |       |            | NoAmplification             |
| aacA/aphD      | 26A    |    |       |            | CurveFitFailed              |
| aacC           | 26A    |    | 30.22 | 85.66      | 1.93                        |
| aacC1          | 26A    |    |       |            | NoAmplification             |
| aacC2          | 26A    |    | 35.98 | 75.28      | 1.88                        |
| aacC4          | 26A    |    | 35.44 | 86.47      | 1.83                        |
| aadA-01        | 26A    |    |       |            | NoAmplification             |
| aadA-02        | 26A    |    |       |            | NoAmplification             |
| aadA-1-01      | 26A    |    |       |            | NoAmplification             |
| aadA-1-02      | 26A    |    |       |            | NoAmplification             |
| aadA1          | 26A    |    | 36.14 | 80.91      | 1.85 MultipleMeltPeaks      |
| aadA2-01       | 26A    |    |       |            | NoAmplification             |
| aadA2-02       | 26A    |    | 32.05 | 75.49      | 2.02                        |
| aadA2-03       | 26A    |    |       |            | NoAmplification             |
| aadA5-01       | 26A    |    | 34    | 84.75      | 1.87                        |
| aadA5-02       | 26A    |    | 36.01 | 83.55      | 1.76                        |
| aadA9-01       | 26A    |    | 35.13 | 83.5       | 1.88                        |
| aadA9-02       | 26A    |    | 34.11 | 88.09      | 1.9                         |
| aadD           | 26A    |    |       |            | NoAmplification             |
| aadE           | 26A    |    |       |            | NoAmplification             |
| acrA-01        | 26A    |    | 35.93 | 89.47      | 1.76 MultipleMeltPeaks      |
| acrA-02        | 26A    |    |       |            | CurveFitFailed              |
| acrA-03        | 26A    |    |       |            | CurveFitFailed              |
| acrA-04        | 26A    |    | 31.28 | 84.72      | 1.98                        |
| acrA-05        | 26A    |    | 30.56 | 86.5       | 1.97                        |
| acrB-01        | 26A    |    |       |            | NoAmplification             |
| acrF           | 26A    |    | 28.32 | 83.04      | 1.84                        |
| acrR-01        | 26A    |    | 34.58 | 81.31      | 1.91                        |
| acrR-02        | 26A    |    | 35.5  | 85.08      | 1.79 MultipleMeltPeaks      |
| Actin          | 26A    |    | 23.46 | 86.71      | 1.97 MultipleMeltPeaks      |
| adeA           | 26A    |    |       |            | NoAmplification             |
| ampC-01        | 26A    |    | 30.56 | 80.62      | 1.99                        |
| ampC-02        | 26A    |    |       |            | NoAmplification             |
| ampC-04        | 26A    |    | 33.48 | 73.68      | 2.07 MultipleMeltPeaks      |
| ampC-05        | 26A    |    |       |            | NoAmplification             |
| ampC-06        | 26A    |    |       |            | HighEfficiency, SaturationB |
| ampC-07        | 26A    |    | 36.1  | 84.67      | 1.79                        |
| ampC-09        | 26A    |    | 37.69 | 76.5       | 1.72 MultipleMeltPeaks      |
| ampC/blaDH     | 26A    |    | 28.34 | 84.43      | 1.95                        |

|                            |     |       |       |      |                             |
|----------------------------|-----|-------|-------|------|-----------------------------|
| aph                        | 26A |       |       |      | NoAmplification             |
| aph(2')-Id-01              | 26A |       |       |      | NoAmplification             |
| aph(2')-Id-02              | 26A |       |       |      | NoAmplification             |
| aph6ia                     | 26A | 29.65 | 78.75 | 1.95 |                             |
| aphA1(aka k <sub>z</sub> ) | 26A |       |       |      | NoAmplification             |
| bacA-01                    | 26A | 41.19 | 74.1  | 1.66 | MultipleMeltPeaks           |
| bacA-02                    | 26A | 35.46 | 84.33 | 1.79 |                             |
| BETA-globin                | 26A | 26.53 | 84.06 | 1.96 |                             |
| bla-ACC-1                  | 26A | 34.7  | 86.2  | 1.86 |                             |
| bla-L1                     | 26A | 29.49 | 85.68 | 2.01 |                             |
| bla1                       | 26A |       |       |      | NoAmplification             |
| blaCMY                     | 26A | 40.15 | 80.64 | 1.79 |                             |
| blaCMY2-01                 | 26A | 36.69 | 77.48 | 1.83 |                             |
| blaCMY2-02                 | 26A | 30.59 | 83.35 | 1.96 |                             |
| blaCTX-M-01                | 26A | 40.4  | 76.24 | 1.92 |                             |
| blaCTX-M-02                | 26A | 30.63 | 79.69 | 1.88 | MultipleMeltPeaks           |
| blaCTX-M-03                | 26A |       |       |      | NoAmplification             |
| blaCTX-M-04                | 26A | 38.36 | 82.65 | 1.76 | MultipleMeltPeaks           |
| blaCTX-M-05                | 26A | 30.36 | 76.5  | 1.85 |                             |
| blaCTX-M-06                | 26A | 36.77 | 82.33 | 1.87 |                             |
| blaGES                     | 26A |       |       |      | NoAmplification             |
| blaIMP-01                  | 26A |       |       |      | NoAmplification             |
| blaIMP-02                  | 26A | 36.15 | 76.72 | 2.59 | BadR2                       |
| blaMOX/blaC                | 26A |       |       |      | NoAmplification             |
| blaOCH                     | 26A | 32.72 | 87.87 | 2.77 |                             |
| blaOKP                     | 26A |       |       |      | BadR2, CtIsSmall, Saturatio |
| blaOXA1/blaC               | 26A |       |       |      | NoAmplification             |
| blaOXA10-01                | 26A |       |       |      | NoAmplification             |
| blaOXA10-02                | 26A |       |       |      | NoAmplification             |
| blaOXY                     | 26A | 34.23 | 90.46 | 1.73 |                             |
| blaPAO                     | 26A |       |       |      | NoAmplification             |
| blaPER                     | 26A | 35.93 | 70.58 | 1.77 |                             |
| blaPSE                     | 26A |       |       |      | NoAmplification             |
| blaROB                     | 26A |       |       |      | NoAmplification             |
| blaSFO                     | 26A | 28.96 | 87.07 | 1.95 | MultipleMeltPeaks           |
| blaSHV-01                  | 26A | 31.8  | 83.21 | 1.97 | MultipleMeltPeaks           |
| blaSHV-02                  | 26A | 36.48 | 79.93 | 1.86 |                             |
| blaTEM                     | 26A | 29.78 | 79.65 | 2.04 |                             |
| blaTLA                     | 26A |       |       |      | NoAmplification             |
| blaVEB                     | 26A |       |       |      | NoAmplification             |
| blaVIM                     | 26A |       |       |      | NoAmplification             |
| blaZ                       | 26A |       |       |      | NoAmplification             |
| carB                       | 26A | 37.74 | 82.62 | 1.82 |                             |
| catA1                      | 26A |       |       |      | NoAmplification             |
| catB3                      | 26A |       |       |      | NoAmplification             |
| catB8                      | 26A | 27.89 | 81.51 | 1.98 |                             |

|            |     |       |       |      |                              |
|------------|-----|-------|-------|------|------------------------------|
| ceoA       | 26A | 28.66 | 82.35 | 1.95 |                              |
| cepA       | 26A |       |       |      | NoAmplification              |
| cfiA       | 26A | 35.02 | 85.98 | 1.78 |                              |
| cfr        | 26A |       |       |      | BadR2, LowEfficiency, CtIs5  |
| cfxA       | 26A | 24.3  | 77.72 | 2.06 |                              |
| cmeA       | 26A |       |       |      | CurveFitFailed               |
| cmlA1-01   | 26A |       |       |      | NoAmplification              |
| cmlA1-02   | 26A | 36.24 | 82.82 | 1.81 | MultipleMeltPeaks            |
| cmr        | 26A |       |       |      | CurveFitFailed               |
| cmx(A)     | 26A | 31.14 | 83.68 | 2.01 |                              |
| cphA-01    | 26A | 34.1  | 81.25 | 1.88 | MultipleMeltPeaks            |
| cphA-02    | 26A | 35.48 | 82.52 | 1.84 |                              |
| dfrA1      | 26A |       |       |      | NoAmplification              |
| dfrA12     | 26A |       |       |      | NoAmplification              |
| emrD       | 26A | 32.01 | 89.93 | 1.86 |                              |
| ereA       | 26A |       |       |      | CurveFitFailed               |
| ereB       | 26A | 31.36 | 80.7  | 2.08 |                              |
| erm(34)    | 26A | 32.78 | 83.2  | 2.05 |                              |
| erm(35)    | 26A |       |       |      | CurveFitFailed               |
| erm(36)    | 26A | 30.46 | 85.66 | 1.95 |                              |
| ermA       | 26A |       |       |      | NoAmplification              |
| ermA/ermTR | 26A |       |       |      | NoAmplification              |
| ermB       | 26A | 26.92 | 75.06 | 2.05 |                              |
| ermC       | 26A | 34.82 | 88.48 | 1.86 |                              |
| ermF       | 26A | 25.44 | 74.74 | 2.01 |                              |
| ermJ/ermD  | 26A |       |       |      | NoAmplification              |
| ermK-01    | 26A |       |       |      | NoAmplification              |
| ermK-02    | 26A |       |       |      | CurveFitFailed               |
| ermT-01    | 26A |       |       |      | NoAmplification              |
| ermT-02    | 26A |       |       |      | CurveFitFailed               |
| ermX       | 26A | 38.65 | 83.63 | 1.66 |                              |
| ermY       | 26A |       |       |      | NoAmplification              |
| fabK       | 26A | 29.33 | 78.96 | 2.12 |                              |
| floR       | 26A |       |       |      | NoAmplification              |
| folA       | 26A |       |       |      | NoAmplification              |
| fosB       | 26A |       |       |      | LowEfficiency, CtIsSmall, S: |
| fosX       | 26A |       |       |      | NoAmplification              |
| fox5       | 26A | 28.19 | 86.51 | 1.9  |                              |
| imiR       | 26A |       |       |      | CurveFitFailed               |
| ImrA-01    | 26A | 38.12 | 82.81 | 1.93 |                              |
| intl       | 26A | 31.09 | 90.64 | 1.94 |                              |
| intl1      | 26A | 22.05 | 87.33 | 2.02 |                              |
| IS613      | 26A | 21.97 | 79.66 | 2.05 |                              |
| lnuA-01    | 26A |       |       |      | LowEfficiency, CtIsSmall, Ci |
| lnuB-01    | 26A |       |       |      | NoAmplification              |
| lnuB-02    | 26A |       |       |      | NoAmplification              |

|               |     |       |       |      |                                         |
|---------------|-----|-------|-------|------|-----------------------------------------|
| lnuC          | 26A | 36.06 | 84.22 | 1.68 |                                         |
| marR-01       | 26A |       |       |      | CurveFitFailed                          |
| matA/mel      | 26A | 23.09 | 77.79 | 2.05 |                                         |
| mdet1         | 26A |       |       |      | NoAmplification                         |
| mdtA          | 26A | 39.95 | 75.92 | 1.66 |                                         |
| mdtE/yhiU     | 26A | 37.55 | 76.49 | 1.83 |                                         |
| mecA          | 26A |       |       |      | NoAmplification                         |
| mefA          | 26A | 22.87 | 80.35 | 2.02 |                                         |
| mepA          | 26A | 37.79 | 78.51 | 1.74 | MultipleMeltPeaks                       |
| mexA          | 26A | 41.98 | 77.98 | 1.7  |                                         |
| mexD          | 26A |       |       |      | NoAmplification                         |
| mexE          | 26A | 34.42 | 88.36 | 1.85 |                                         |
| mexF          | 26A | 28.16 | 87.35 | 1.94 |                                         |
| mphA-01       | 26A | 34.41 | 87.52 | 1.84 |                                         |
| mphA-02       | 26A | 33.81 | 86.98 | 1.96 |                                         |
| mphB          | 26A |       |       |      | CurveFitFailed                          |
| mphC          | 26A |       |       |      | CurveFitFailed                          |
| msrA-01       | 26A |       |       |      | CurveFitFailed                          |
| msrC-01       | 26A |       |       |      | NoAmplification                         |
| mtrC-01       | 26A | 38.12 | 83.19 | 1.69 | MultipleMeltPeaks                       |
| mtrC-02       | 26A | 31.83 | 85.09 | 1.94 |                                         |
| mtrD-02       | 26A | 27.56 | 83.06 | 2.05 |                                         |
| mtrD-03       | 26A | 33.14 | 83.65 | 1.9  |                                         |
| NDM1          | 26A |       |       |      | NoAmplification                         |
| nimE          | 26A |       |       |      | NoAmplification                         |
| nisB          | 26A |       |       |      | NoAmplification                         |
| oleC          | 26A | 38.39 | 84.36 | 1.78 | MultipleMeltPeaks                       |
| oprD          | 26A | 30.08 | 81.55 | 1.96 |                                         |
| oprJ          | 26A | 30.53 | 86.35 | 1.88 | MultipleMeltPeaks                       |
| pbp           | 26A | 37.88 | 81.52 | 1.87 |                                         |
| pbp2x         | 26A | 27.44 | 75.6  | 2.15 |                                         |
| Pbp5          | 26A |       |       |      | LowEfficiency, CtlSmall, S <sub>c</sub> |
| penA          | 26A | 33.79 | 87.29 | 1.78 | MultipleMeltPeaks                       |
| pikR1         | 26A |       |       |      | CurveFitFailed                          |
| pikR2         | 26A | 30.75 | 91.88 | 2.02 | MultipleMeltPeaks                       |
| pmrA          | 26A | 27.63 | 79.63 | 2.07 |                                         |
| pncA          | 26A | 36.3  | 80.14 | 1.79 |                                         |
| putative mul1 | 26A |       |       |      | NoAmplification                         |
| qac           | 26A |       |       |      | CurveFitFailed                          |
| qacA          | 26A | 35.01 | 70.74 | 1.96 |                                         |
| qacA/qacB     | 26A |       |       |      | NoAmplification                         |
| qacEdelta1-0  | 26A |       |       |      | NoAmplification                         |
| qacEdelta1-0  | 26A | 32.9  | 81.3  | 1.97 |                                         |
| qacH-01       | 26A | 36.94 | 77.59 | 1.82 | MultipleMeltPeaks                       |
| qacH-02       | 26A | 38.07 | 83.76 | 1.62 |                                         |
| qnrA          | 26A |       |       |      | NoAmplification                         |



|              |     |       |       |      |                              |
|--------------|-----|-------|-------|------|------------------------------|
| rarD-02      | 26A |       |       |      | NoAmplification              |
| sat4         | 26A |       |       |      | NoAmplification              |
| sdeB         | 26A |       |       |      | LowEfficiency, CtIsSmall, Se |
| spcN-01      | 26A |       |       |      | CurveFitFailed               |
| speA         | 26A |       |       |      | NoAmplification              |
| str          | 26A |       |       |      | NoAmplification              |
| strA         | 26A |       |       |      | NoAmplification              |
| strB         | 26A | 37.74 | 83.95 | 1.73 | MultipleMeltPeaks            |
| sul1         | 26A |       |       |      | NoAmplification              |
| sul2         | 26A |       |       |      | NoAmplification              |
| sulA/foIP-01 | 26A | 25.13 | 81.73 | 1.97 |                              |
| sulA/foIP-03 | 26A | 22.95 | 83.92 | 1.99 |                              |
| tet(32)      | 26A | 26.56 | 81.33 | 2    |                              |
| tet(34)      | 26A | 29.8  | 76.09 | 2.04 |                              |
| tet(35)      | 26A |       |       |      | NoAmplification              |
| tet(36)-A    | 26A |       |       |      | NoAmplification              |
| tet(36)-B    | 26A |       |       |      | NoAmplification              |
| tet(37)      | 26A | 26.67 | 76.47 | 2    |                              |
| tetA-01      | 26A |       |       |      | NoAmplification              |
| tetA-02      | 26A | 35.97 | 76.44 | 1.88 |                              |
| tetB-01      | 26A | 34.55 | 79.12 | 1.91 | MultipleMeltPeaks            |
| tetB-02      | 26A | 42.29 | 79.51 | 1.67 | MultipleMeltPeaks            |
| tetC-01      | 26A |       |       |      | NoAmplification              |
| tetC-02      | 26A | 37.38 | 78.58 | 1.78 |                              |
| tetD-01      | 26A |       |       |      | NoAmplification              |
| tetD-02      | 26A | 40.32 | 85.15 | 1.73 | MultipleMeltPeaks            |
| tetE         | 26A |       |       |      | NoAmplification              |
| tetG-01      | 26A | 34.56 | 89.99 | 1.86 |                              |
| tetG-02      | 26A | 34.51 | 82.22 | 1.93 |                              |
| tetH         | 26A |       |       |      | NoAmplification              |
| tetJ         | 26A |       |       |      | CurveFitFailed               |
| tetK         | 26A |       |       |      | NoAmplification              |
| tetL-01      | 26A |       |       |      | NoAmplification              |
| tetL-02      | 26A | 37.33 | 85.29 | 1.71 |                              |
| tetM-01      | 26A | 24.31 | 76.19 | 2.01 |                              |
| tetM-02      | 26A | 26.02 | 77.78 | 1.95 |                              |
| tetO-01      | 26A |       |       |      | NoAmplification              |
| tetPA        | 26A |       |       |      | NoAmplification              |
| tetPB-01     | 26A |       |       |      | NoAmplification              |
| tetPB-02     | 26A | 31.13 | 84.94 | 1.92 |                              |
| tetPB-03     | 26A |       |       |      | NoAmplification              |
| tetPB-05     | 26A |       |       |      | NoAmplification              |
| tetQ         | 26A | 23.74 | 77.62 | 2.04 |                              |
| tetR-02      | 26A | 31.99 | 86.69 | 1.9  |                              |
| tetR-03      | 26A |       |       |      | NoAmplification              |
| tetS         | 26A |       |       |      | NoAmplification              |

|             |     |       |       |      |                             |
|-------------|-----|-------|-------|------|-----------------------------|
| tetT        | 26A |       |       |      | NoAmplification             |
| tetU-01     | 26A |       |       |      | NoAmplification             |
| tetV        | 26A |       |       |      | NoAmplification             |
| tetW-01     | 26A | 26.48 | 81.96 | 1.96 |                             |
| tetX        | 26A |       |       |      | NoAmplification             |
| tnpA-01     | 26A | 36.22 | 79.49 | 1.87 |                             |
| tnpA-02     | 26A | 35.34 | 84.36 | 1.73 |                             |
| tnpA-03     | 26A | 30.54 | 75.7  | 2.24 |                             |
| tnpA-04     | 26A |       |       |      | NoAmplification             |
| tnpA-05     | 26A | 37.09 | 61.29 | 1.64 | MultipleMeltPeaks           |
| tnpA-07     | 26A |       |       |      | NoAmplification             |
| tolC-01     | 26A |       |       |      | NoAmplification             |
| tolC-02     | 26A | 32.24 | 87.84 | 1.93 | MultipleMeltPeaks           |
| tolC-03     | 26A | 32.97 | 85.27 | 1.91 |                             |
| Tp614       | 26A | 37.18 | 73.66 | 1.77 | MultipleMeltPeaks           |
| ttgA        | 26A | 39.55 | 67    | 3.04 | BadR2, HighEfficiency, Mul  |
| ttgB        | 26A |       |       |      | NoAmplification             |
| vanA        | 26A |       |       |      | NoAmplification             |
| vanB-01     | 26A | 31.89 | 83.52 | 1.94 |                             |
| vanC-01     | 26A |       |       |      | BadR2, HighEfficiency, Satu |
| vanC-02     | 26A |       |       |      | NoAmplification             |
| vanC-03     | 26A | 28.04 | 86.48 | 1.93 | MultipleMeltPeaks           |
| vanC1       | 26A |       |       |      | NoAmplification             |
| vanC2/vanC3 | 26A | 36.66 | 76.01 | 1.79 | MultipleMeltPeaks           |
| vanG        | 26A |       |       |      | NoAmplification             |
| vanHB       | 26A | 32.7  | 86.4  | 1.95 |                             |
| vanHD       | 26A | 37.71 | 80.37 | 1.8  | MultipleMeltPeaks           |
| vanRA-01    | 26A |       |       |      | NoAmplification             |
| vanRA-02    | 26A | 33.82 | 76.02 | 1.99 |                             |
| vanRB       | 26A | 37.97 | 80.69 | 1.86 |                             |
| vanRC       | 26A |       |       |      | NoAmplification             |
| vanRC4      | 26A |       |       |      | NoAmplification             |
| vanRD       | 26A |       |       |      | NoAmplification             |
| vanSA       | 26A |       |       |      | NoAmplification             |
| vanSB       | 26A | 34.6  | 76.98 | 2.02 |                             |
| vanSC-01    | 26A | 31.28 | 77.87 | 2    |                             |
| vanSC-02    | 26A | 34.67 | 75.82 | 1.99 |                             |
| vanTC-01    | 26A |       |       |      | NoAmplification             |
| vanTC-02    | 26A | 37.96 | 87.71 | 1.74 | MultipleMeltPeaks           |
| vanTE       | 26A |       |       |      | NoAmplification             |
| vanTG       | 26A | 31.88 | 75.18 | 2.02 |                             |
| vanWB       | 26A |       |       |      | NoAmplification             |
| vanWG       | 26A |       |       |      | CurveFitFailed              |
| vanXA       | 26A |       |       |      | CurveFitFailed              |
| vanXB       | 26A |       |       |      | NoAmplification             |
| vanXD       | 26A | 30.13 | 75.67 | 2.08 |                             |

|              |     |       |       |      |                             |
|--------------|-----|-------|-------|------|-----------------------------|
| vanYB        | 26A |       |       |      | NoAmplification             |
| vanYD-01     | 26A |       |       |      | CurveFitFailed              |
| vanYD-02     | 26A |       |       |      | NoAmplification             |
| vatB-01      | 26A |       |       |      | CurveFitFailed              |
| vatB-02      | 26A | 39.32 | 78.54 | 1.81 | MultipleMeltPeaks           |
| vatC-01      | 26A | 33.78 | 74.29 | 1.96 |                             |
| vatC-02      | 26A | 38.61 | 83.37 | 1.89 | MultipleMeltPeaks           |
| vatE-01      | 26A | 28.58 | 77.51 | 2.17 |                             |
| vatE-02      | 26A | 36.27 | 75.82 | 2.03 |                             |
| vgaA-01      | 26A | 37.45 | 84.67 | 1.81 |                             |
| vgaA-02      | 26A |       |       |      | LowEfficiency, CurveFitFail |
| vgb-01       | 26A | 37.18 | 75.01 | 1.81 | MultipleMeltPeaks           |
| vgbB-01      | 26A |       |       |      | NoAmplification             |
| vgbB-02      | 26A |       |       |      | NoAmplification             |
| yceE/mdtG-0  | 26A | 36.83 | 77.57 | 1.87 |                             |
| yceE/mdtG-0  | 26A |       |       |      | NoAmplification             |
| yceL/mdtH-0  | 26A | 29.29 | 84.31 | 1.91 |                             |
| yceL/mdtH-0  | 26A |       |       |      | NoAmplification             |
| yceL/mdtH-0  | 26A | 40.67 | 61.6  | 1.53 | MultipleMeltPeaks           |
| yidY/mdtL-01 | 26A | 32.17 | 76.01 | 1.95 |                             |
| yidY/mdtL-02 | 26A | 32.32 | 92.68 | 1.96 |                             |































| Assay          | Sample | Ct | Tm    | Efficiency | flag                         |
|----------------|--------|----|-------|------------|------------------------------|
| 16S rRNA       | 26B    |    | 16.07 | 82.67      | 2.04                         |
| aac            | 26B    |    | 31.56 | 88.44      | 2.09 MultipleMeltPeaks       |
| aac(6')-Ib(akz | 26B    |    |       |            | NoAmplification              |
| aac(6')-Ib(akz | 26B    |    | 32.74 | 79.08      | 1.96 MultipleMeltPeaks       |
| aac(6')-Ib(akz | 26B    |    | 31.14 | 81.68      | 1.96 MultipleMeltPeaks       |
| aac(6')-II     | 26B    |    | 39.45 | 80.03      | 1.61 MultipleMeltPeaks       |
| aac(6')I1      | 26B    |    |       |            | NoAmplification              |
| aacA/aphD      | 26B    |    |       |            | CurveFitFailed               |
| aacC           | 26B    |    | 29.37 | 86.06      | 1.99                         |
| aacC1          | 26B    |    | 36.4  | 84.29      | 1.86                         |
| aacC2          | 26B    |    |       |            | NoAmplification              |
| aacC4          | 26B    |    | 30.98 | 83.73      | 1.89                         |
| aadA-01        | 26B    |    | 38.41 | 77.72      | 1.9                          |
| aadA-02        | 26B    |    | 34.45 | 80.63      | 1.95                         |
| aadA-1-01      | 26B    |    | 34.6  | 82.38      | 1.87 MultipleMeltPeaks       |
| aadA-1-02      | 26B    |    |       |            | CurveFitFailed               |
| aadA1          | 26B    |    | 32.73 | 84.83      | 1.9                          |
| aadA2-01       | 26B    |    | 40.82 | 76.65      | 1.67 MultipleMeltPeaks       |
| aadA2-02       | 26B    |    | 35.49 | 75         | 1.88                         |
| aadA2-03       | 26B    |    | 36.8  | 61.46      | 2.11 MultipleMeltPeaks       |
| aadA5-01       | 26B    |    | 29.27 | 77.11      | 2.05                         |
| aadA5-02       | 26B    |    | 32.5  | 77.81      | 2 MultipleMeltPeaks          |
| aadA9-01       | 26B    |    | 36.88 | 82.41      | 1.83                         |
| aadA9-02       | 26B    |    | 34.34 | 73.65      | 1.95                         |
| aadD           | 26B    |    |       |            | CurveFitFailed               |
| aadE           | 26B    |    |       |            | LowEfficiency, CtIsSmall, S: |
| acrA-01        | 26B    |    | 34.14 | 88.85      | 1.82                         |
| acrA-02        | 26B    |    | 31.44 | 81.56      | 1.93                         |
| acrA-03        | 26B    |    | 37.66 | 76.84      | 1.8                          |
| acrA-04        | 26B    |    | 28.93 | 80.81      | 1.98                         |
| acrA-05        | 26B    |    | 31.22 | 80.7       | 1.96                         |
| acrB-01        | 26B    |    | 38.4  | 76.28      | 1.8                          |
| acrF           | 26B    |    | 28.5  | 82.93      | 1.83                         |
| acrR-01        | 26B    |    | 33.31 | 81.23      | 1.94                         |
| acrR-02        | 26B    |    | 32.97 | 86.88      | 1.89                         |
| Actin          | 26B    |    | 22.05 | 86.79      | 1.99                         |
| adeA           | 26B    |    | 32.4  | 79.78      | 1.95                         |
| ampC-01        | 26B    |    | 30.9  | 84.9       | 1.99                         |
| ampC-02        | 26B    |    |       |            | CurveFitFailed               |
| ampC-04        | 26B    |    | 29.84 | 79.41      | 1.99 MultipleMeltPeaks       |
| ampC-05        | 26B    |    |       |            | LowEfficiency, CtIsSmall, C: |
| ampC-06        | 26B    |    |       |            | CurveFitFailed               |
| ampC-07        | 26B    |    | 36    | 81.51      | 1.86                         |
| ampC-09        | 26B    |    |       |            | LowEfficiency, CtIsSmall, S: |
| ampC/blaDH     | 26B    |    | 28.75 | 83.96      | 1.95                         |

|                            |     |       |       |      |                                          |
|----------------------------|-----|-------|-------|------|------------------------------------------|
| aph                        | 26B | 37.93 | 73.13 | 1.86 |                                          |
| aph(2')-Id-01              | 26B |       |       |      | CurveFitFailed                           |
| aph(2')-Id-02              | 26B |       |       |      | CurveFitFailed                           |
| aph6ia                     | 26B | 29.08 | 78.34 | 1.93 |                                          |
| aphA1(aka k <sub>z</sub> ) | 26B |       |       |      | BadR2, LowEfficiency, CtIsS              |
| bacA-01                    | 26B | 34.91 | 75.6  | 1.96 | MultipleMeltPeaks                        |
| bacA-02                    | 26B | 33.84 | 87.87 | 1.83 |                                          |
| BETA-globin                | 26B | 25.6  | 84.08 | 1.98 |                                          |
| bla-ACC-1                  | 26B | 31.67 | 74.09 | 1.99 |                                          |
| bla-L1                     | 26B | 27.62 | 85.63 | 2    |                                          |
| bla1                       | 26B |       |       |      | CurveFitFailed                           |
| blaCMY                     | 26B |       |       |      | NoAmplification                          |
| blaCMY2-01                 | 26B | 31.67 | 83.67 | 1.93 |                                          |
| blaCMY2-02                 | 26B | 31.54 | 85.3  | 1.91 |                                          |
| blaCTX-M-01                | 26B |       |       |      | NoAmplification                          |
| blaCTX-M-02                | 26B | 30.22 | 84.35 | 1.91 |                                          |
| blaCTX-M-03                | 26B |       |       |      | SaturationBaselineRatiolsL               |
| blaCTX-M-04                | 26B | 32.21 | 85.54 | 1.89 |                                          |
| blaCTX-M-05                | 26B | 31.02 | 84.62 | 1.78 |                                          |
| blaCTX-M-06                | 26B |       |       |      | LowEfficiency, CtIsSmall, C              |
| blaGES                     | 26B |       |       |      | CurveFitFailed                           |
| blaIMP-01                  | 26B |       |       |      | CurveFitFailed                           |
| blaIMP-02                  | 26B |       |       |      | NoAmplification                          |
| blaMOX/blaC                | 26B | 38.06 | 82.38 | 1.82 |                                          |
| blaOCH                     | 26B |       |       |      | NoAmplification                          |
| blaOKP                     | 26B |       |       |      | NoAmplification                          |
| blaOXA1/blaC               | 26B |       |       |      | NoAmplification                          |
| blaOXA10-01                | 26B |       |       |      | NoAmplification                          |
| blaOXA10-02                | 26B |       |       |      | LowEfficiency, CtIsSmall, S <sub>e</sub> |
| blaOXY                     | 26B | 35.58 | 86.24 | 1.7  |                                          |
| blaPAO                     | 26B |       |       |      | NoAmplification                          |
| blaPER                     | 26B | 36.74 | 70.3  | 1.72 |                                          |
| blaPSE                     | 26B |       |       |      | NoAmplification                          |
| blaROB                     | 26B |       |       |      | CurveFitFailed                           |
| blaSFO                     | 26B | 28.74 | 83.16 | 1.94 | MultipleMeltPeaks                        |
| blaSHV-01                  | 26B | 31.22 | 87.68 | 2.06 |                                          |
| blaSHV-02                  | 26B | 31.31 | 83.72 | 2.04 |                                          |
| blaTEM                     | 26B | 30.63 | 79.28 | 2.07 |                                          |
| blaTLA                     | 26B |       |       |      | LowEfficiency, CtIsSmall, S <sub>e</sub> |
| blaVEB                     | 26B |       |       |      | LowEfficiency, CtIsSmall, C <sub>i</sub> |
| blaVIM                     | 26B |       |       |      | NoAmplification                          |
| blaZ                       | 26B |       |       |      | CurveFitFailed                           |
| carB                       | 26B |       |       |      | CurveFitFailed                           |
| catA1                      | 26B | 30.35 | 79.67 | 1.98 |                                          |
| catB3                      | 26B | 34.31 | 87.79 | 1.9  |                                          |
| catB8                      | 26B | 26.82 | 84.24 | 1.97 |                                          |

|            |     |       |       |      |                              |
|------------|-----|-------|-------|------|------------------------------|
| ceoA       | 26B | 28.26 | 82.26 | 1.94 | MultipleMeltPeaks            |
| cepA       | 26B |       |       |      | NoAmplification              |
| cfiA       | 26B | 31.18 | 87.37 | 1.96 |                              |
| cfr        | 26B |       |       |      | LowEfficiency, CtIsSmall, S: |
| cfxA       | 26B |       |       |      | CurveFitFailed               |
| cmeA       | 26B |       |       |      | CtIsLarge, CurveFitFailed    |
| cmlA1-01   | 26B |       |       |      | NoAmplification              |
| cmlA1-02   | 26B | 38.21 | 82.72 | 1.78 | MultipleMeltPeaks            |
| cmr        | 26B |       |       |      | NoAmplification              |
| cmx(A)     | 26B | 29.13 | 85.93 | 1.98 |                              |
| cphA-01    | 26B | 29.88 | 85.89 | 1.95 |                              |
| cphA-02    | 26B | 34.35 | 82.63 | 1.88 |                              |
| dfrA1      | 26B |       |       |      | NoAmplification              |
| dfrA12     | 26B | 39.31 | 85.88 | 1.6  | MultipleMeltPeaks            |
| emrD       | 26B |       |       |      | CurveFitFailed               |
| ereA       | 26B |       |       |      | NoAmplification              |
| ereB       | 26B | 33.7  | 85.48 | 2    |                              |
| erm(34)    | 26B |       |       |      | NoAmplification              |
| erm(35)    | 26B |       |       |      | LowEfficiency, CtIsSmall, S: |
| erm(36)    | 26B | 30.84 | 87.65 | 1.96 | MultipleMeltPeaks            |
| ermA       | 26B |       |       |      | LowEfficiency, CtIsSmall, S: |
| ermA/ermTR | 26B |       |       |      | NoAmplification              |
| ermB       | 26B | 27.69 | 75.26 | 2.1  |                              |
| ermC       | 26B | 38.2  | 75.85 | 1.84 |                              |
| ermF       | 26B |       |       |      | NoAmplification              |
| ermJ/ermD  | 26B |       |       |      | LowEfficiency, CtIsSmall, S: |
| ermK-01    | 26B |       |       |      | NoAmplification              |
| ermK-02    | 26B | 37.64 | 83.6  | 1.68 | MultipleMeltPeaks            |
| ermT-01    | 26B |       |       |      | NoAmplification              |
| ermT-02    | 26B |       |       |      | CurveFitFailed               |
| ermX       | 26B | 37.28 | 86.15 | 1.69 | MultipleMeltPeaks            |
| ermY       | 26B |       |       |      | CurveFitFailed               |
| fabK       | 26B | 28.34 | 81.92 | 2.04 | MultipleMeltPeaks            |
| floR       | 26B |       |       |      | NoAmplification              |
| folA       | 26B |       |       |      | NoAmplification              |
| fosB       | 26B |       |       |      | LowEfficiency, CtIsSmall, S: |
| fosX       | 26B |       |       |      | LowEfficiency, CtIsSmall, C: |
| fox5       | 26B | 26.33 | 86.58 | 1.93 | MultipleMeltPeaks            |
| imiR       | 26B |       |       |      | CurveFitFailed               |
| ImrA-01    | 26B | 34.72 | 82.8  | 1.96 |                              |
| intl       | 26B | 28.64 | 85.04 | 1.99 |                              |
| intl1      | 26B | 20.64 | 87.13 | 2.03 |                              |
| IS613      | 26B | 25.56 | 79.75 | 2.05 |                              |
| lnuA-01    | 26B |       |       |      | CurveFitFailed               |
| lnuB-01    | 26B |       |       |      | LowEfficiency, CtIsSmall, S: |
| lnuB-02    | 26B | 33.24 | 78.11 | 2    |                              |

|                |     |       |       |      |                             |
|----------------|-----|-------|-------|------|-----------------------------|
| lnuC           | 26B | 36.16 | 84.28 | 1.68 |                             |
| marR-01        | 26B | 36.73 | 85.69 | 1.76 |                             |
| matA/mel       | 26B | 24.06 | 77.52 | 2.03 | MultipleMeltPeaks           |
| mdet1          | 26B |       |       |      | NoAmplification             |
| mdtA           | 26B | 34.09 | 81.8  | 1.84 |                             |
| mdtE/yhiU      | 26B | 37.55 | 76.8  | 1.87 |                             |
| mecA           | 26B |       |       |      | LowEfficiency, CtIsSmall, S |
| mefA           | 26B | 23.47 | 80.48 | 1.97 |                             |
| mepA           | 26B | 34.35 | 86.28 | 1.83 | MultipleMeltPeaks           |
| mexA           | 26B |       |       |      | LowEfficiency, CtIsSmall, C |
| mexD           | 26B | 33.4  | 84.11 | 1.91 |                             |
| mexE           | 26B | 33.58 | 83.47 | 1.92 |                             |
| mexF           | 26B | 22.74 | 81.6  | 1.83 | MultipleMeltPeaks           |
| mphA-01        | 26B | 30.76 | 85.97 | 1.99 |                             |
| mphA-02        | 26B | 31.48 | 78.48 | 2.16 | MultipleMeltPeaks           |
| mphB           | 26B |       |       |      | CurveFitFailed              |
| mphC           | 26B |       |       |      | CurveFitFailed              |
| msrA-01        | 26B |       |       |      | NoAmplification             |
| msrC-01        | 26B |       |       |      | NoAmplification             |
| mtrC-01        | 26B |       |       |      | CurveFitFailed              |
| mtrC-02        | 26B | 29.64 | 84.8  | 2    |                             |
| mtrD-02        | 26B | 26.04 | 82.39 | 2.06 |                             |
| mtrD-03        | 26B | 26.95 | 82.27 | 1.89 |                             |
| NDM1           | 26B |       |       |      | BadR2, LowEfficiency, CtIsS |
| nimE           | 26B |       |       |      | NoAmplification             |
| nisB           | 26B |       |       |      | CurveFitFailed              |
| oleC           | 26B |       |       |      | CurveFitFailed              |
| oprD           | 26B | 29.04 | 85.33 | 1.97 |                             |
| oprJ           | 26B | 38.85 | 89.21 | 1.7  | MultipleMeltPeaks           |
| pbp            | 26B | 38.02 | 80.86 | 1.77 |                             |
| pbp2x          | 26B | 26.49 | 75.56 | 2.13 |                             |
| Pbp5           | 26B |       |       |      | LowEfficiency, CtIsSmall, S |
| penA           | 26B | 30.19 | 80.57 | 1.95 |                             |
| pikR1          | 26B |       |       |      | NoAmplification             |
| pikR2          | 26B | 29.49 | 86.88 | 2.07 | MultipleMeltPeaks           |
| pmrA           | 26B | 30.92 | 79.76 | 2.04 |                             |
| pncA           | 26B | 34.65 | 90.55 | 1.75 |                             |
| putative multi | 26B | 31.58 | 84.47 | 1.95 |                             |
| qac            | 26B |       |       |      | CurveFitFailed              |
| qacA           | 26B | 32.84 | 71.25 | 1.98 |                             |
| qacA/qacB      | 26B | 40.84 | 83.08 | 1.49 | MultipleMeltPeaks           |
| qacEdelta1-0   | 26B |       |       |      | CurveFitFailed              |
| qacEdelta1-0   | 26B | 31.84 | 77.45 | 2.02 |                             |
| qacH-01        | 26B | 31.39 | 86.79 | 1.91 |                             |
| qacH-02        | 26B | 34.47 | 83.91 | 1.66 |                             |
| qnrA           | 26B |       |       |      | NoAmplification             |

|              |     |       |       |      |                              |
|--------------|-----|-------|-------|------|------------------------------|
| rarD-02      | 26B | 40.49 | 83.49 | 1.72 | MultipleMeltPeaks            |
| sat4         | 26B |       |       |      | CurveFitFailed               |
| sdeB         | 26B |       |       |      | CurveFitFailed               |
| spcN-01      | 26B |       |       |      | NoAmplification              |
| speA         | 26B |       |       |      | NoAmplification              |
| str          | 26B |       |       |      | NoAmplification              |
| strA         | 26B |       |       |      | BadR2, LowEfficiency, CtIsS  |
| strB         | 26B |       |       |      | NoAmplification              |
| sul1         | 26B | 34.74 | 86.38 | 1.78 | MultipleMeltPeaks            |
| sul2         | 26B |       |       |      | BadR2, LowEfficiency, CtIsS  |
| sulA/foIP-01 | 26B | 25.75 | 81.38 | 1.99 |                              |
| sulA/foIP-03 | 26B | 24.25 | 83.45 | 1.99 |                              |
| tet(32)      | 26B |       |       |      | CurveFitFailed               |
| tet(34)      | 26B | 29.61 | 76.24 | 2.05 |                              |
| tet(35)      | 26B |       |       |      | NoAmplification              |
| tet(36)-A    | 26B |       |       |      | CurveFitFailed               |
| tet(36)-B    | 26B |       |       |      | CurveFitFailed               |
| tet(37)      | 26B | 32.95 | 78.36 | 1.95 | MultipleMeltPeaks            |
| tetA-01      | 26B | 30.1  | 85.12 | 1.89 |                              |
| tetA-02      | 26B |       |       |      | CurveFitFailed               |
| tetB-01      | 26B | 34.21 | 86.04 | 1.88 |                              |
| tetB-02      | 26B | 39.43 | 76.43 | 1.72 |                              |
| tetC-01      | 26B |       |       |      | NoAmplification              |
| tetC-02      | 26B |       |       |      | CurveFitFailed               |
| tetD-01      | 26B |       |       |      | NoAmplification              |
| tetD-02      | 26B | 37.04 | 76.27 | 1.87 |                              |
| tetE         | 26B |       |       |      | NoAmplification              |
| tetG-01      | 26B | 32.04 | 82.84 | 1.97 |                              |
| tetG-02      | 26B | 27.22 | 82.73 | 1.95 |                              |
| tetH         | 26B |       |       |      | LowEfficiency, CtIsSmall, Ci |
| tetJ         | 26B | 37.06 | 80.64 | 1.84 |                              |
| tetK         | 26B |       |       |      | CurveFitFailed               |
| tetL-01      | 26B | 36.35 | 80.99 | 1.75 | MultipleMeltPeaks            |
| tetL-02      | 26B | 34    | 85.29 | 1.79 |                              |
| tetM-01      | 26B | 25.27 | 76.22 | 2.01 |                              |
| tetM-02      | 26B | 28.28 | 77.82 | 1.97 |                              |
| tetO-01      | 26B |       |       |      | CurveFitFailed               |
| tetPA        | 26B | 33.67 | 72.04 | 2.06 |                              |
| tetPB-01     | 26B |       |       |      | NoAmplification              |
| tetPB-02     | 26B | 29.68 | 85.09 | 1.95 |                              |
| tetPB-03     | 26B |       |       |      | BadR2, LowEfficiency, CtIsS  |
| tetPB-05     | 26B |       |       |      | CurveFitFailed               |
| tetQ         | 26B | 28.37 | 77.58 | 2.01 |                              |
| tetR-02      | 26B | 32.99 | 84.9  | 1.91 |                              |
| tetR-03      | 26B |       |       |      | CurveFitFailed               |
| tetS         | 26B |       |       |      | CurveFitFailed               |

|             |     |       |       |      |                              |
|-------------|-----|-------|-------|------|------------------------------|
| tetT        | 26B |       |       |      | LowEfficiency, CtIsSmall, Ci |
| tetU-01     | 26B | 38.91 | 77.09 | 1.84 |                              |
| tetV        | 26B |       |       |      | LowEfficiency, CtIsSmall, Ci |
| tetW-01     | 26B |       |       |      | CurveFitFailed               |
| tetX        | 26B |       |       |      | CurveFitFailed               |
| tnpA-01     | 26B | 37.37 | 79.59 | 1.84 |                              |
| tnpA-02     | 26B | 34.47 | 84.67 | 1.72 |                              |
| tnpA-03     | 26B | 30.68 | 75.63 | 2.23 |                              |
| tnpA-04     | 26B | 34.43 | 78.69 | 1.91 |                              |
| tnpA-05     | 26B | 32.49 | 82.86 | 1.93 |                              |
| tnpA-07     | 26B |       |       |      | NoAmplification              |
| tolC-01     | 26B |       |       |      | CurveFitFailed               |
| tolC-02     | 26B | 29.45 | 85.2  | 1.97 | MultipleMeltPeaks            |
| tolC-03     | 26B | 30.42 | 89.2  | 1.95 | MultipleMeltPeaks            |
| Tp614       | 26B | 36.17 | 81.96 | 1.83 |                              |
| ttgA        | 26B | 36.31 | 81.58 | 1.88 |                              |
| ttgB        | 26B | 38    | 75.91 | 1.88 |                              |
| vanA        | 26B |       |       |      | NoAmplification              |
| vanB-01     | 26B | 35.11 | 89.67 | 1.81 | MultipleMeltPeaks            |
| vanC-01     | 26B | 40.91 | 61.86 | 1.66 | MultipleMeltPeaks            |
| vanC-02     | 26B |       |       |      | NoAmplification              |
| vanC-03     | 26B | 26.62 | 86.01 | 1.94 | MultipleMeltPeaks            |
| vanC1       | 26B |       |       |      | NoAmplification              |
| vanC2/vanC3 | 26B | 32.01 | 82.21 | 2.02 |                              |
| vanG        | 26B |       |       |      | NoAmplification              |
| vanHB       | 26B | 34.92 | 80.51 | 1.89 | MultipleMeltPeaks            |
| vanHD       | 26B | 34.16 | 84.14 | 1.89 |                              |
| vanRA-01    | 26B |       |       |      | LowEfficiency, CtIsSmall, S: |
| vanRA-02    | 26B | 31.56 | 81.64 | 1.98 | MultipleMeltPeaks            |
| vanRB       | 26B | 32.92 | 87.79 | 2.03 |                              |
| vanRC       | 26B |       |       |      | CurveFitFailed               |
| vanRC4      | 26B |       |       |      | LowEfficiency, CtIsSmall, S: |
| vanRD       | 26B |       |       |      | NoAmplification              |
| vanSA       | 26B |       |       |      | NoAmplification              |
| vanSB       | 26B | 31.03 | 75.18 | 2.1  |                              |
| vanSC-01    | 26B |       |       |      | NoAmplification              |
| vanSC-02    | 26B |       |       |      | NoAmplification              |
| vanTC-01    | 26B |       |       |      | NoAmplification              |
| vanTC-02    | 26B | 38.21 | 82.84 | 1.68 |                              |
| vanTE       | 26B |       |       |      | NoAmplification              |
| vanTG       | 26B |       |       |      | NoAmplification              |
| vanWB       | 26B |       |       |      | NoAmplification              |
| vanWG       | 26B | 39.3  | 75.5  | 1.89 |                              |
| vanXA       | 26B |       |       |      | LowEfficiency, CurveFitFail  |
| vanXB       | 26B |       |       |      | NoAmplification              |
| vanXD       | 26B | 30.29 | 76.36 | 2.06 |                              |

|              |     |       |       |      |                              |
|--------------|-----|-------|-------|------|------------------------------|
| vanYB        | 26B | 38.18 | 81.62 | 1.85 | MultipleMeltPeaks            |
| vanYD-01     | 26B | 35.61 | 81.57 | 1.74 |                              |
| vanYD-02     | 26B |       |       |      | NoAmplification              |
| vatB-01      | 26B | 37.13 | 74.9  | 1.85 | MultipleMeltPeaks            |
| vatB-02      | 26B | 36.1  | 78.45 | 1.9  |                              |
| vatC-01      | 26B | 29.14 | 73.9  | 2.04 |                              |
| vatC-02      | 26B | 36.34 | 86.46 | 1.85 | MultipleMeltPeaks            |
| vatE-01      | 26B | 28.72 | 77.41 | 2.18 |                              |
| vatE-02      | 26B |       |       |      | NoAmplification              |
| vgaA-01      | 26B |       |       |      | LowEfficiency, CtIsSmall, S: |
| vgaA-02      | 26B |       |       |      | CurveFitFailed               |
| vgb-01       | 26B | 38.44 | 75.25 | 1.73 | MultipleMeltPeaks            |
| vgbB-01      | 26B |       |       |      | CurveFitFailed               |
| vgbB-02      | 26B |       |       |      | NoAmplification              |
| yceE/mdtG-0  | 26B | 40.59 | 78.07 | 1.79 |                              |
| yceE/mdtG-0  | 26B | 37.71 | 81.11 | 1.8  |                              |
| yceL/mdtH-0  | 26B | 30.05 | 83.41 | 1.93 |                              |
| yceL/mdtH-0  | 26B |       |       |      | NoAmplification              |
| yceL/mdtH-0  | 26B | 32.38 | 86.17 | 1.98 | MultipleMeltPeaks            |
| yidY/mdtL-01 | 26B | 33.6  | 88.77 | 1.88 | MultipleMeltPeaks            |
| yidY/mdtL-02 | 26B |       |       |      | CurveFitFailed               |































| Assay          | Sample | Ct | Tm    | Efficiency | flag                         |
|----------------|--------|----|-------|------------|------------------------------|
| 16S rRNA       | 26C    |    | 20.79 | 82.27      | 2.04                         |
| aac            | 26C    |    | 30.58 | 84.46      | 1.93 MultipleMeltPeaks       |
| aac(6')-Ib(akz | 26C    |    | 33.62 | 80.62      | 1.95                         |
| aac(6')-Ib(akz | 26C    |    | 29.18 | 82.77      | 1.97                         |
| aac(6')-Ib(akz | 26C    |    | 32.2  | 81.28      | 1.98                         |
| aac(6')-II     | 26C    |    | 33.88 | 90.29      | 1.77 MultipleMeltPeaks       |
| aac(6')I1      | 26C    |    |       |            | NoAmplification              |
| aacA/aphD      | 26C    |    |       |            | LowEfficiency, CtIsSmall, S: |
| aacC           | 26C    |    | 28.45 | 92.07      | 1.86 MultipleMeltPeaks       |
| aacC1          | 26C    |    |       |            | LowEfficiency, CtIsSmall, S: |
| aacC2          | 26C    |    |       |            | LowEfficiency, CtIsSmall, C: |
| aacC4          | 26C    |    | 32.27 | 83.78      | 1.95 MultipleMeltPeaks       |
| aadA-01        | 26C    |    | 34.67 | 75.7       | 2.04                         |
| aadA-02        | 26C    |    | 32.28 | 80.51      | 1.98                         |
| aadA-1-01      | 26C    |    | 34.24 | 85.56      | 1.86                         |
| aadA-1-02      | 26C    |    |       |            | CurveFitFailed               |
| aadA1          | 26C    |    | 34.83 | 83.96      | 1.88                         |
| aadA2-01       | 26C    |    | 36.07 | 84.75      | 1.77 MultipleMeltPeaks       |
| aadA2-02       | 26C    |    | 33.73 | 75.43      | 1.97                         |
| aadA2-03       | 26C    |    |       |            | BadR2, LowEfficiency, CtIsS: |
| aadA5-01       | 26C    |    | 31.88 | 85.26      | 1.95                         |
| aadA5-02       | 26C    |    | 31.28 | 84.07      | 2.01 MultipleMeltPeaks       |
| aadA9-01       | 26C    |    | 35.38 | 87.98      | 1.81                         |
| aadA9-02       | 26C    |    | 37.68 | 74         | 1.95 MultipleMeltPeaks       |
| aadD           | 26C    |    |       |            | LowEfficiency, CtIsSmall, S: |
| aadE           | 26C    |    | 37.89 | 71.45      | 1.91                         |
| acrA-01        | 26C    |    | 33.07 | 89.02      | 1.84                         |
| acrA-02        | 26C    |    | 35.68 | 84.67      | 1.86                         |
| acrA-03        | 26C    |    |       |            | CurveFitFailed               |
| acrA-04        | 26C    |    | 28.18 | 87.51      | 1.99                         |
| acrA-05        | 26C    |    | 29.9  | 88.84      | 1.95                         |
| acrB-01        | 26C    |    | 36.62 | 75.97      | 1.89 MultipleMeltPeaks       |
| acrF           | 26C    |    | 26.32 | 84.89      | 1.83                         |
| acrR-01        | 26C    |    | 32.45 | 81.24      | 1.95                         |
| acrR-02        | 26C    |    | 30.36 | 86.96      | 2.01                         |
| Actin          | 26C    |    | 23.79 | 86.72      | 1.95                         |
| adeA           | 26C    |    | 36.06 | 77.31      | 1.9                          |
| ampC-01        | 26C    |    | 32.36 | 84.68      | 2.03                         |
| ampC-02        | 26C    |    | 38.31 | 81.59      | 1.7                          |
| ampC-04        | 26C    |    | 31.4  | 79.05      | 1.96                         |
| ampC-05        | 26C    |    |       |            | CurveFitFailed               |
| ampC-06        | 26C    |    | 32.5  | 88.23      | 1.88                         |
| ampC-07        | 26C    |    | 31.92 | 88.36      | 1.9                          |
| ampC-09        | 26C    |    | 34.66 | 76.44      | 1.97                         |
| ampC/blaDH     | 26C    |    | 27.59 | 84.48      | 1.98                         |

|                          |     |       |       |      |                                          |
|--------------------------|-----|-------|-------|------|------------------------------------------|
| aph                      | 26C |       |       |      | CurveFitFailed                           |
| aph(2')-Id-01            | 26C |       |       |      | CurveFitFailed                           |
| aph(2')-Id-02            | 26C |       |       |      | LowEfficiency, CtIsSmall, S <sub>e</sub> |
| aph6ia                   | 26C | 28.02 | 78.59 | 1.96 |                                          |
| aphA1(aka k <sub>e</sub> | 26C |       |       |      | LowEfficiency, CtIsSmall, S <sub>e</sub> |
| bacA-01                  | 26C | 33.57 | 86.8  | 2    |                                          |
| bacA-02                  | 26C | 32.89 | 88.28 | 1.85 |                                          |
| BETA-globin              | 26C | 23.64 | 83.99 | 1.98 | MultipleMeltPeaks                        |
| bla-ACC-1                | 26C | 34.74 | 88.71 | 1.86 | MultipleMeltPeaks                        |
| bla-L1                   | 26C | 27.4  | 85.86 | 1.99 |                                          |
| bla1                     | 26C |       |       |      | LowEfficiency, CtIsSmall, S <sub>e</sub> |
| blaCMY                   | 26C |       |       |      | BadR2, LowEfficiency, CtIsS              |
| blaCMY2-01               | 26C | 32.97 | 82.78 | 1.96 |                                          |
| blaCMY2-02               | 26C | 27.71 | 85.83 | 1.96 | MultipleMeltPeaks                        |
| blaCTX-M-01              | 26C |       |       |      | NoAmplification                          |
| blaCTX-M-02              | 26C | 28.46 | 85.25 | 1.91 |                                          |
| blaCTX-M-03              | 26C |       |       |      | CurveFitFailed                           |
| blaCTX-M-04              | 26C | 31.49 | 85.59 | 1.89 |                                          |
| blaCTX-M-05              | 26C | 32.26 | 76.84 | 1.82 |                                          |
| blaCTX-M-06              | 26C |       |       |      | NoAmplification                          |
| blaGES                   | 26C |       |       |      | NoAmplification                          |
| blaIMP-01                | 26C | 35.9  | 74.8  | 1.94 |                                          |
| blaIMP-02                | 26C |       |       |      | CurveFitFailed                           |
| blaMOX/blaC              | 26C | 34.14 | 82.12 | 1.96 |                                          |
| blaOCH                   | 26C | 31.12 | 86.66 | 2.14 | MultipleMeltPeaks                        |
| blaOKP                   | 26C |       |       |      | NoAmplification                          |
| blaOXA1/blaC             | 26C |       |       |      | LowEfficiency, CtIsSmall, S <sub>e</sub> |
| blaOXA10-01              | 26C |       |       |      | BadR2, LowEfficiency, CtIsS              |
| blaOXA10-02              | 26C | 37.62 | 78.83 | 1.9  |                                          |
| blaOXY                   | 26C | 32.7  | 90.07 | 1.82 |                                          |
| blaPAO                   | 26C | 36.39 | 80.79 | 1.88 |                                          |
| blaPER                   | 26C | 34.93 | 78.72 | 1.9  |                                          |
| blaPSE                   | 26C |       |       |      | CurveFitFailed                           |
| blaROB                   | 26C |       |       |      | NoAmplification                          |
| blaSFO                   | 26C | 29.24 | 84.3  | 1.93 |                                          |
| blaSHV-01                | 26C | 34.3  | 87.76 | 1.72 |                                          |
| blaSHV-02                | 26C | 36.97 | 81.5  | 1.82 |                                          |
| blaTEM                   | 26C | 27.22 | 79.63 | 2.06 |                                          |
| blaTLA                   | 26C |       |       |      | LowEfficiency, CtIsSmall, S <sub>e</sub> |
| blaVEB                   | 26C |       |       |      | LowEfficiency, CtIsSmall, S <sub>e</sub> |
| blaVIM                   | 26C | 36.72 | 62.1  | 2.56 | SaturationBaselineRatiolsL               |
| blaZ                     | 26C |       |       |      | CurveFitFailed                           |
| carB                     | 26C | 36.97 | 79.8  | 1.8  | MultipleMeltPeaks                        |
| catA1                    | 26C |       |       |      | NoAmplification                          |
| catB3                    | 26C | 33.43 | 81.19 | 2.04 |                                          |
| catB8                    | 26C | 26.69 | 82.02 | 1.97 | MultipleMeltPeaks                        |

|            |     |       |       |      |                              |
|------------|-----|-------|-------|------|------------------------------|
| ceoA       | 26C | 26.64 | 82.17 | 1.94 | MultipleMeltPeaks            |
| cepA       | 26C |       |       |      | NoAmplification              |
| cfiA       | 26C | 30.39 | 87.29 | 1.92 | MultipleMeltPeaks            |
| cfr        | 26C |       |       |      | LowEfficiency, CtIsSmall, S: |
| cfxA       | 26C | 25.33 | 77.92 | 2.06 |                              |
| cmeA       | 26C | 35.07 | 84.83 | 1.8  |                              |
| cmlA1-01   | 26C |       |       |      | LowEfficiency, CtIsSmall, S: |
| cmlA1-02   | 26C | 36.29 | 82.76 | 1.81 | MultipleMeltPeaks            |
| cmr        | 26C |       |       |      | CurveFitFailed               |
| cmx(A)     | 26C | 26.88 | 84.55 | 2.01 | MultipleMeltPeaks            |
| cphA-01    | 26C | 31.06 | 91.57 | 1.95 | MultipleMeltPeaks            |
| cphA-02    | 26C | 33.47 | 82.72 | 1.93 |                              |
| dfrA1      | 26C |       |       |      | NoAmplification              |
| dfrA12     | 26C | 36.91 | 82.58 | 1.66 | MultipleMeltPeaks            |
| emrD       | 26C | 40.97 | 86.32 | 1.67 | MultipleMeltPeaks            |
| ereA       | 26C | 36.12 | 83.52 | 1.83 |                              |
| ereB       | 26C |       |       |      | CurveFitFailed               |
| erm(34)    | 26C |       |       |      | NoAmplification              |
| erm(35)    | 26C | 36.74 | 78.33 | 1.84 |                              |
| erm(36)    | 26C | 32.56 | 87.31 | 2.12 | MultipleMeltPeaks            |
| ermA       | 26C |       |       |      | CurveFitFailed               |
| ermA/ermTR | 26C | 38.06 | 87.89 | 1.73 |                              |
| ermB       | 26C | 25.86 | 75.31 | 2.1  |                              |
| ermC       | 26C |       |       |      | CurveFitFailed               |
| ermF       | 26C | 26.85 | 74.84 | 2    |                              |
| ermJ/ermD  | 26C |       |       |      | BadR2, LowEfficiency, CtIsS  |
| ermK-01    | 26C | 38.24 | 89.75 | 1.82 | MultipleMeltPeaks            |
| ermK-02    | 26C | 32.33 | 85.89 | 1.92 |                              |
| ermT-01    | 26C |       |       |      | LowEfficiency, CtIsSmall, C: |
| ermT-02    | 26C |       |       |      | CurveFitFailed               |
| ermX       | 26C | 33.96 | 87.69 | 1.82 |                              |
| ermY       | 26C |       |       |      | LowEfficiency, CtIsSmall, S: |
| fabK       | 26C | 25.02 | 79.55 | 2.08 |                              |
| floR       | 26C |       |       |      | NoAmplification              |
| folA       | 26C |       |       |      | NoAmplification              |
| fosB       | 26C |       |       |      | LowEfficiency, CtIsSmall, S: |
| fosX       | 26C |       |       |      | LowEfficiency, CtIsSmall, S: |
| fox5       | 26C | 25.96 | 87.59 | 1.94 | MultipleMeltPeaks            |
| imiR       | 26C |       |       |      | CurveFitFailed               |
| ImrA-01    | 26C | 38.38 | 79.62 | 1.81 |                              |
| intl       | 26C | 27.53 | 84.78 | 1.98 | MultipleMeltPeaks            |
| intl1      | 26C | 19.66 | 87.16 | 2    |                              |
| IS613      | 26C | 23.68 | 79.64 | 2.11 |                              |
| lnuA-01    | 26C |       |       |      | CurveFitFailed               |
| lnuB-01    | 26C |       |       |      | CurveFitFailed               |
| lnuB-02    | 26C |       |       |      | LowEfficiency, CtIsSmall, S: |

|                |     |       |       |      |                              |
|----------------|-----|-------|-------|------|------------------------------|
| lnuC           | 26C | 32.19 | 84.33 | 1.81 | MultipleMeltPeaks            |
| marR-01        | 26C | 32.31 | 85.54 | 1.93 |                              |
| matA/mel       | 26C | 21.89 | 77.41 | 2.08 |                              |
| mdet1          | 26C |       |       |      | CurveFitFailed               |
| mdtA           | 26C | 34.51 | 82.09 | 1.71 | MultipleMeltPeaks            |
| mdtE/yhiU      | 26C | 37.52 | 83.68 | 1.71 | MultipleMeltPeaks            |
| mecA           | 26C |       |       |      | LowEfficiency, CtIsSmall, S: |
| mefA           | 26C | 21.59 | 80.54 | 1.94 |                              |
| mepA           | 26C | 30.21 | 84.75 | 1.99 |                              |
| mexA           | 26C |       |       |      | BadR2, LowEfficiency, CtIsS  |
| mexD           | 26C | 37.52 | 78.65 | 2.12 | MultipleMeltPeaks            |
| mexE           | 26C |       |       |      | NoAmplification              |
| mexF           | 26C | 27.98 | 87.89 | 2.02 | MultipleMeltPeaks            |
| mphA-01        | 26C | 30.77 | 83.84 | 2.01 | MultipleMeltPeaks            |
| mphA-02        | 26C | 29.33 | 86.86 | 1.96 |                              |
| mphB           | 26C |       |       |      | CurveFitFailed               |
| mphC           | 26C | 37.58 | 79.34 | 1.71 | MultipleMeltPeaks            |
| msrA-01        | 26C |       |       |      | LowEfficiency, CtIsSmall, S: |
| msrC-01        | 26C |       |       |      | NoAmplification              |
| mtrC-01        | 26C | 36.76 | 83.18 | 1.85 |                              |
| mtrC-02        | 26C | 30.57 | 84.43 | 2.01 |                              |
| mtrD-02        | 26C | 25.27 | 85.32 | 2.06 | MultipleMeltPeaks            |
| mtrD-03        | 26C | 30.48 | 83.98 | 1.96 |                              |
| NDM1           | 26C |       |       |      | CurveFitFailed               |
| nimE           | 26C | 36.53 | 87.6  | 1.9  |                              |
| nisB           | 26C | 38.21 | 82.27 | 1.9  |                              |
| oleC           | 26C | 35.94 | 84.36 | 1.89 |                              |
| oprD           | 26C | 26.82 | 86.79 | 1.99 |                              |
| oprJ           | 26C | 32.65 | 90.65 | 1.86 |                              |
| pbp            | 26C | 37.77 | 79.53 | 1.91 |                              |
| pbp2x          | 26C |       |       |      | NoAmplification              |
| Pbp5           | 26C |       |       |      | LowEfficiency, CtIsSmall, S: |
| penA           | 26C | 37.1  | 85.4  | 1.7  | MultipleMeltPeaks            |
| pikR1          | 26C | 36.57 | 80.9  | 1.89 |                              |
| pikR2          | 26C | 31.96 | 84.51 | 1.97 |                              |
| pmrA           | 26C | 28.41 | 79.29 | 2.09 |                              |
| pncA           | 26C | 39.69 | 80.14 | 1.69 |                              |
| putative multi | 26C | 31.2  | 84.52 | 1.95 |                              |
| qac            | 26C | 33.07 | 79.19 | 1.99 |                              |
| qacA           | 26C |       |       |      | CurveFitFailed               |
| qacA/qacB      | 26C | 37.92 | 85.11 | 1.49 | MultipleMeltPeaks            |
| qacEdelta1-0   | 26C |       |       |      | LowEfficiency, CtIsSmall, Ci |
| qacEdelta1-0   | 26C | 35.01 | 80.73 | 1.94 |                              |
| qacH-01        | 26C | 30.19 | 85.7  | 1.96 | MultipleMeltPeaks            |
| qacH-02        | 26C | 34.89 | 83.68 | 1.66 |                              |
| qnrA           | 26C | 37.11 | 80.35 | 1.84 |                              |



|              |     |       |       |      |                                          |
|--------------|-----|-------|-------|------|------------------------------------------|
| rarD-02      | 26C | 38.21 | 85.87 | 1.77 |                                          |
| sat4         | 26C |       |       |      | LowEfficiency, CtIsSmall, S <sub>e</sub> |
| sdeB         | 26C | 32.08 | 78.79 | 1.99 |                                          |
| spcN-01      | 26C |       |       |      | NoAmplification                          |
| speA         | 26C |       |       |      | NoAmplification                          |
| str          | 26C |       |       |      | CurveFitFailed                           |
| strA         | 26C |       |       |      | CurveFitFailed                           |
| strB         | 26C | 38.43 | 77.16 | 1.74 | MultipleMeltPeaks                        |
| sul1         | 26C | 33.65 | 89.9  | 1.82 | MultipleMeltPeaks                        |
| sul2         | 26C |       |       |      | LowEfficiency, CtIsSmall, S <sub>e</sub> |
| sulA/foIP-01 | 26C | 25.44 | 81.33 | 2.01 |                                          |
| sulA/foIP-03 | 26C | 26.48 | 83.92 | 1.97 |                                          |
| tet(32)      | 26C |       |       |      | NoAmplification                          |
| tet(34)      | 26C | 29.91 | 76.03 | 2.06 |                                          |
| tet(35)      | 26C |       |       |      | LowEfficiency, CtIsSmall, S <sub>e</sub> |
| tet(36)-A    | 26C |       |       |      | CurveFitFailed                           |
| tet(36)-B    | 26C |       |       |      | LowEfficiency, CtIsSmall, S <sub>e</sub> |
| tet(37)      | 26C | 26.83 | 82.89 | 2    | MultipleMeltPeaks                        |
| tetA-01      | 26C | 29.83 | 85.17 | 1.89 |                                          |
| tetA-02      | 26C | 36.84 | 85.42 | 1.85 |                                          |
| tetB-01      | 26C | 34.86 | 81.33 | 1.91 | MultipleMeltPeaks                        |
| tetB-02      | 26C | 29.07 | 79.76 | 1.99 |                                          |
| tetC-01      | 26C |       |       |      | NoAmplification                          |
| tetC-02      | 26C | 38.02 | 76.32 | 1.87 |                                          |
| tetD-01      | 26C |       |       |      | LowEfficiency, CtIsSmall, S <sub>e</sub> |
| tetD-02      | 26C | 34.34 | 85.98 | 2.02 | MultipleMeltPeaks                        |
| tetE         | 26C |       |       |      | LowEfficiency, CtIsSmall, S <sub>e</sub> |
| tetG-01      | 26C | 34.86 | 82.08 | 1.86 | MultipleMeltPeaks                        |
| tetG-02      | 26C | 35.75 | 80.46 | 1.86 |                                          |
| tetH         | 26C |       |       |      | CurveFitFailed                           |
| tetJ         | 26C | 36.27 | 80.37 | 1.86 |                                          |
| tetK         | 26C |       |       |      | LowEfficiency, CtIsSmall, S <sub>e</sub> |
| tetL-01      | 26C | 38.7  | 79.97 | 1.71 | MultipleMeltPeaks                        |
| tetL-02      | 26C | 31.18 | 85.43 | 1.94 |                                          |
| tetM-01      | 26C | 23.91 | 76.15 | 2.03 |                                          |
| tetM-02      | 26C | 25.57 | 77.98 | 1.99 |                                          |
| tetO-01      | 26C |       |       |      | CurveFitFailed                           |
| tetPA        | 26C |       |       |      | NoAmplification                          |
| tetPB-01     | 26C |       |       |      | NoAmplification                          |
| tetPB-02     | 26C | 28.85 | 85.15 | 1.99 |                                          |
| tetPB-03     | 26C |       |       |      | LowEfficiency, CtIsSmall, S <sub>e</sub> |
| tetPB-05     | 26C |       |       |      | LowEfficiency, CtIsSmall, S <sub>e</sub> |
| tetQ         | 26C | 25.75 | 76.83 | 2.01 |                                          |
| tetR-02      | 26C | 35.99 | 84.87 | 1.73 |                                          |
| tetR-03      | 26C |       |       |      | LowEfficiency, CtIsSmall, S <sub>e</sub> |
| tetS         | 26C | 28.25 | 73.64 | 2.18 |                                          |

|             |     |       |       |      |                              |
|-------------|-----|-------|-------|------|------------------------------|
| tetT        | 26C |       |       |      | LowEfficiency, CtIsSmall, S: |
| tetU-01     | 26C |       |       |      | CurveFitFailed               |
| tetV        | 26C |       |       |      | CurveFitFailed               |
| tetW-01     | 26C | 26.92 | 82.1  | 1.97 |                              |
| tetX        | 26C |       |       |      | CurveFitFailed               |
| tnpA-01     | 26C |       |       |      | CurveFitFailed               |
| tnpA-02     | 26C | 32.1  | 85.78 | 1.76 |                              |
| tnpA-03     | 26C | 31.85 | 75.6  | 2.22 |                              |
| tnpA-04     | 26C | 39.15 | 85.9  | 1.69 | MultipleMeltPeaks            |
| tnpA-05     | 26C | 35.15 | 83.9  | 1.8  |                              |
| tnpA-07     | 26C |       |       |      | CurveFitFailed               |
| tolC-01     | 26C | 34.79 | 82.14 | 1.86 | MultipleMeltPeaks            |
| tolC-02     | 26C | 28.74 | 87.29 | 1.95 |                              |
| tolC-03     | 26C | 30.12 | 86.15 | 1.91 |                              |
| Tp614       | 26C | 30.16 | 83.56 | 1.94 |                              |
| ttgA        | 26C | 35.09 | 88.02 | 1.82 |                              |
| ttgB        | 26C | 31.67 | 86.83 | 1.97 |                              |
| vanA        | 26C |       |       |      | NoAmplification              |
| vanB-01     | 26C | 33.14 | 83.22 | 1.93 |                              |
| vanC-01     | 26C | 33.04 | 77.63 | 2.06 |                              |
| vanC-02     | 26C |       |       |      | CurveFitFailed               |
| vanC-03     | 26C | 25.44 | 86.16 | 1.93 |                              |
| vanC1       | 26C |       |       |      | LowEfficiency, CtIsSmall, Ci |
| vanC2/vanC3 | 26C | 30.03 | 85.79 | 2.12 |                              |
| vanG        | 26C |       |       |      | LowEfficiency, CtIsSmall, Ci |
| vanHB       | 26C | 33.9  | 80.8  | 1.93 |                              |
| vanHD       | 26C | 35.05 | 80.82 | 1.85 | MultipleMeltPeaks            |
| vanRA-01    | 26C |       |       |      | LowEfficiency, CtIsSmall, S: |
| vanRA-02    | 26C |       |       |      | CurveFitFailed               |
| vanRB       | 26C | 29.16 | 87.88 | 1.98 |                              |
| vanRC       | 26C |       |       |      | LowEfficiency, CtIsSmall, S: |
| vanRC4      | 26C |       |       |      | LowEfficiency, CtIsSmall, S: |
| vanRD       | 26C |       |       |      | BadR2, CtIsSmall, Saturatio  |
| vanSA       | 26C |       |       |      | CurveFitFailed               |
| vanSB       | 26C | 30.07 | 75.12 | 2.07 |                              |
| vanSC-01    | 26C | 36.79 | 89.26 | 1.77 |                              |
| vanSC-02    | 26C |       |       |      | NoAmplification              |
| vanTC-01    | 26C |       |       |      | LowEfficiency, CtIsSmall, S: |
| vanTC-02    | 26C | 31.05 | 86.75 | 1.89 | MultipleMeltPeaks            |
| vanTE       | 26C | 36.39 | 78.05 | 1.79 | MultipleMeltPeaks            |
| vanTG       | 26C |       |       |      | NoAmplification              |
| vanWB       | 26C |       |       |      | LowEfficiency, CtIsSmall, Ci |
| vanWG       | 26C | 39.81 | 73.29 | 1.83 |                              |
| vanXA       | 26C |       |       |      | CurveFitFailed               |
| vanXB       | 26C | 37.41 | 76.01 | 1.88 | MultipleMeltPeaks            |
| vanXD       | 26C | 30.78 | 76.33 | 2.08 |                              |

|              |     |       |       |      |                              |
|--------------|-----|-------|-------|------|------------------------------|
| vanYB        | 26C | 37.82 | 84.19 | 1.81 |                              |
| vanYD-01     | 26C | 31.31 | 83.47 | 1.91 | MultipleMeltPeaks            |
| vanYD-02     | 26C |       |       |      | LowEfficiency, CtIsSmall, Ci |
| vatB-01      | 26C | 38.71 | 81.45 | 1.78 | MultipleMeltPeaks            |
| vatB-02      | 26C | 31.56 | 77.51 | 2.05 |                              |
| vatC-01      | 26C | 32.54 | 81.32 | 2    |                              |
| vatC-02      | 26C | 33.51 | 87.81 | 1.86 |                              |
| vatE-01      | 26C | 28.74 | 76.36 | 2.18 | MultipleMeltPeaks            |
| vatE-02      | 26C |       |       |      | NoAmplification              |
| vgaA-01      | 26C | 34.48 | 82.38 | 1.91 |                              |
| vgaA-02      | 26C |       |       |      | CurveFitFailed               |
| vgb-01       | 26C | 38.24 | 83.09 | 1.72 | MultipleMeltPeaks            |
| vgbB-01      | 26C |       |       |      | CurveFitFailed               |
| vgbB-02      | 26C |       |       |      | LowEfficiency, CtIsSmall, Ci |
| yceE/mdtG-0  | 26C |       |       |      | CurveFitFailed               |
| yceE/mdtG-0  | 26C |       |       |      | CtIsLarge, CurveFitFailed    |
| yceL/mdtH-0  | 26C | 27.15 | 83.96 | 2    |                              |
| yceL/mdtH-0  | 26C |       |       |      | NoAmplification              |
| yceL/mdtH-0  | 26C | 33.32 | 78.56 | 1.95 |                              |
| yidY/mdtL-01 | 26C | 29.76 | 84.49 | 1.97 | MultipleMeltPeaks            |
| yidY/mdtL-02 | 26C |       |       |      | CurveFitFailed               |































| Assay          | Sample | Ct | Tm    | Efficiency | flag                         |
|----------------|--------|----|-------|------------|------------------------------|
| 16S rRNA       | 27A    |    | 19.67 | 81.47      | 2.07                         |
| aac            | 27A    |    | 29.22 | 87.44      | 1.98                         |
| aac(6')-Ib(akε | 27A    |    | 32.84 | 77.69      | 1.97                         |
| aac(6')-Ib(akε | 27A    |    | 29.25 | 82.49      | 2 MultipleMeltPeaks          |
| aac(6')-Ib(akε | 27A    |    | 30.35 | 88.12      | 1.96                         |
| aac(6')-II     | 27A    |    | 34.26 | 81.07      | 1.63 MultipleMeltPeaks       |
| aac(6')I1      | 27A    |    | 36.44 | 88.71      | 1.74                         |
| aacA/aphD      | 27A    |    |       |            | BadR2, LowEfficiency, CtIsS  |
| aacC           | 27A    |    | 31.73 | 85.53      | 1.85                         |
| aacC1          | 27A    |    | 39.07 | 84.3       | 1.79                         |
| aacC2          | 27A    |    |       |            | LowEfficiency, CtIsSmall, Ci |
| aacC4          | 27A    |    | 32.24 | 83.64      | 1.96 MultipleMeltPeaks       |
| aadA-01        | 27A    |    |       |            | CurveFitFailed               |
| aadA-02        | 27A    |    | 33.77 | 80.07      | 1.95 MultipleMeltPeaks       |
| aadA-1-01      | 27A    |    | 34.65 | 82.11      | 1.9 MultipleMeltPeaks        |
| aadA-1-02      | 27A    |    |       |            | CurveFitFailed               |
| aadA1          | 27A    |    | 33.91 | 84.67      | 1.97                         |
| aadA2-01       | 27A    |    | 32.96 | 79.31      | 1.9 MultipleMeltPeaks        |
| aadA2-02       | 27A    |    | 30.25 | 75.9       | 2.09                         |
| aadA2-03       | 27A    |    |       |            | CurveFitFailed               |
| aadA5-01       | 27A    |    | 34.53 | 89.04      | 1.86                         |
| aadA5-02       | 27A    |    | 29.39 | 85.53      | 1.95 MultipleMeltPeaks       |
| aadA9-01       | 27A    |    | 38.05 | 82.79      | 1.85                         |
| aadA9-02       | 27A    |    |       |            | CurveFitFailed               |
| aadD           | 27A    |    |       |            | CurveFitFailed               |
| aadE           | 27A    |    |       |            | LowEfficiency, CtIsSmall, Sε |
| acrA-01        | 27A    |    | 30.68 | 89.11      | 1.9                          |
| acrA-02        | 27A    |    | 31.4  | 88.81      | 1.86                         |
| acrA-03        | 27A    |    |       |            | CurveFitFailed               |
| acrA-04        | 27A    |    | 28.26 | 85.17      | 1.98 MultipleMeltPeaks       |
| acrA-05        | 27A    |    | 28.81 | 89.33      | 1.94                         |
| acrB-01        | 27A    |    |       |            | CurveFitFailed               |
| acrF           | 27A    |    | 28.85 | 82.35      | 1.99 MultipleMeltPeaks       |
| acrR-01        | 27A    |    | 31.19 | 90.54      | 1.94 MultipleMeltPeaks       |
| acrR-02        | 27A    |    | 32.59 | 86.6       | 1.91                         |
| Actin          | 27A    |    | 23.51 | 86.94      | 1.96                         |
| adeA           | 27A    |    | 32.65 | 77.4       | 1.96                         |
| ampC-01        | 27A    |    | 30.98 | 85.59      | 1.97 MultipleMeltPeaks       |
| ampC-02        | 27A    |    |       |            | NoAmplification              |
| ampC-04        | 27A    |    | 30.5  | 86.08      | 1.98 MultipleMeltPeaks       |
| ampC-05        | 27A    |    |       |            | NoAmplification              |
| ampC-06        | 27A    |    | 37.94 | 83.13      | 1.71 MultipleMeltPeaks       |
| ampC-07        | 27A    |    | 32.29 | 88.38      | 1.9                          |
| ampC-09        | 27A    |    |       |            | CurveFitFailed               |
| ampC/blaDH     | 27A    |    | 27.57 | 84.63      | 2                            |

|                            |     |       |       |      |                              |
|----------------------------|-----|-------|-------|------|------------------------------|
| aph                        | 27A |       |       |      | CurveFitFailed               |
| aph(2')-Id-01              | 27A |       |       |      | LowEfficiency, CtIsSmall, S: |
| aph(2')-Id-02              | 27A |       |       |      | CurveFitFailed               |
| aph6ia                     | 27A | 33.19 | 85.89 | 1.94 |                              |
| aphA1(aka k <sub>a</sub> ) | 27A |       |       |      | LowEfficiency, CtIsSmall, S: |
| bacA-01                    | 27A |       |       |      | CurveFitFailed               |
| bacA-02                    | 27A | 32.06 | 88.35 | 1.86 |                              |
| BETA-globin                | 27A | 23.67 | 84.11 | 1.97 |                              |
| bla-ACC-1                  | 27A | 32.06 | 86.36 | 1.94 |                              |
| bla-L1                     | 27A | 28.08 | 85.05 | 1.96 | MultipleMeltPeaks            |
| bla1                       | 27A |       |       |      | CurveFitFailed               |
| blaCMY                     | 27A | 39.07 | 81.16 | 1.79 | MultipleMeltPeaks            |
| blaCMY2-01                 | 27A | 33.28 | 88.45 | 1.95 |                              |
| blaCMY2-02                 | 27A | 28.23 | 84.29 | 1.98 |                              |
| blaCTX-M-01                | 27A | 38    | 78.82 | 1.76 | MultipleMeltPeaks            |
| blaCTX-M-02                | 27A | 29.24 | 84.95 | 1.92 |                              |
| blaCTX-M-03                | 27A |       |       |      | LowEfficiency, CtIsSmall, S: |
| blaCTX-M-04                | 27A | 29.89 | 90.79 | 1.91 | MultipleMeltPeaks            |
| blaCTX-M-05                | 27A | 31.09 | 77.28 | 1.79 |                              |
| blaCTX-M-06                | 27A |       |       |      | NoAmplification              |
| blaGES                     | 27A |       |       |      | NoAmplification              |
| blaIMP-01                  | 27A |       |       |      | CurveFitFailed               |
| blaIMP-02                  | 27A | 34.02 | 79.13 | 1.98 |                              |
| blaMOX/blaC                | 27A |       |       |      | NoAmplification              |
| blaOCH                     | 27A |       |       |      | NoAmplification              |
| blaOKP                     | 27A |       |       |      | NoAmplification              |
| blaOXA1/blaC               | 27A |       |       |      | LowEfficiency, CtIsSmall, S: |
| blaOXA10-01                | 27A | 36.81 | 83.36 | 1.8  |                              |
| blaOXA10-02                | 27A |       |       |      | BadR2, LowEfficiency, CtIsS  |
| blaOXY                     | 27A | 34.32 | 88.63 | 1.74 |                              |
| blaPAO                     | 27A |       |       |      | LowEfficiency, CtIsSmall, C: |
| blaPER                     | 27A |       |       |      | CurveFitFailed               |
| blaPSE                     | 27A |       |       |      | LowEfficiency, CtIsSmall, S: |
| blaROB                     | 27A |       |       |      | NoAmplification              |
| blaSFO                     | 27A | 28.73 | 82.76 | 1.93 | MultipleMeltPeaks            |
| blaSHV-01                  | 27A | 31.28 | 87.86 | 1.95 |                              |
| blaSHV-02                  | 27A | 35.15 | 81.84 | 1.85 |                              |
| blaTEM                     | 27A | 36.12 | 83.91 | 1.8  | MultipleMeltPeaks            |
| blaTLA                     | 27A |       |       |      | CurveFitFailed               |
| blaVEB                     | 27A |       |       |      | CurveFitFailed               |
| blaVIM                     | 27A |       |       |      | LowEfficiency, CtIsSmall, C: |
| blaZ                       | 27A |       |       |      | LowEfficiency, CtIsSmall, S: |
| carB                       | 27A |       |       |      | LowEfficiency, CtIsSmall, S: |
| catA1                      | 27A |       |       |      | NoAmplification              |
| catB3                      | 27A | 34.69 | 80.25 | 1.94 |                              |
| catB8                      | 27A | 27.59 | 81.86 | 1.95 |                              |

|            |     |       |       |      |                              |
|------------|-----|-------|-------|------|------------------------------|
| ceoA       | 27A | 26.05 | 82.12 | 1.94 | MultipleMeltPeaks            |
| cepA       | 27A |       |       |      | NoAmplification              |
| cfiA       | 27A | 28.61 | 86.83 | 1.98 |                              |
| cfr        | 27A |       |       |      | CurveFitFailed               |
| cfxA       | 27A | 27.38 | 77.88 | 2.08 |                              |
| cmeA       | 27A | 36.77 | 78.23 | 1.81 | MultipleMeltPeaks            |
| cmlA1-01   | 27A | 32.71 | 79.96 | 1.99 |                              |
| cmlA1-02   | 27A |       |       |      | CurveFitFailed               |
| cmr        | 27A | 36.16 | 78.83 | 1.82 |                              |
| cmx(A)     | 27A | 26.22 | 84.45 | 2    | MultipleMeltPeaks            |
| cphA-01    | 27A | 28.28 | 85.65 | 1.96 | MultipleMeltPeaks            |
| cphA-02    | 27A | 31.5  | 82.68 | 1.95 | MultipleMeltPeaks            |
| dfrA1      | 27A | 36.85 | 83.58 | 1.82 | MultipleMeltPeaks            |
| dfrA12     | 27A | 33.39 | 81.2  | 1.96 |                              |
| emrD       | 27A | 37.85 | 78.91 | 1.73 |                              |
| ereA       | 27A | 32.33 | 83.07 | 1.98 |                              |
| ereB       | 27A | 40.01 | 80.38 | 1.62 | MultipleMeltPeaks            |
| erm(34)    | 27A | 38.55 | 87.83 | 1.62 |                              |
| erm(35)    | 27A |       |       |      | BadR2, LowEfficiency, CtIsS  |
| erm(36)    | 27A | 31.68 | 85.89 | 2.06 |                              |
| ermA       | 27A |       |       |      | CurveFitFailed               |
| ermA/ermTR | 27A |       |       |      | BadR2, LowEfficiency, CtIsS  |
| ermB       | 27A | 24.75 | 75.19 | 2.14 |                              |
| ermC       | 27A |       |       |      | CurveFitFailed               |
| ermF       | 27A |       |       |      | LowEfficiency, CtIsSmall, S: |
| ermJ/ermD  | 27A |       |       |      | LowEfficiency, CtIsSmall, S: |
| ermK-01    | 27A | 37.29 | 74.4  | 2.46 | MultipleMeltPeaks            |
| ermK-02    | 27A | 34.25 | 84.04 | 1.75 | MultipleMeltPeaks            |
| ermT-01    | 27A |       |       |      | LowEfficiency, CtIsSmall, S: |
| ermT-02    | 27A | 32.98 | 79.9  | 2.04 |                              |
| ermX       | 27A | 32.69 | 86.69 | 1.82 |                              |
| ermY       | 27A |       |       |      | LowEfficiency, CtIsSmall, S: |
| fabK       | 27A | 23.43 | 78.26 | 2.15 |                              |
| floR       | 27A |       |       |      | NoAmplification              |
| folA       | 27A | 33.87 | 79.96 | 1.89 |                              |
| fosB       | 27A |       |       |      | LowEfficiency, CtIsSmall, S: |
| fosX       | 27A |       |       |      | LowEfficiency, CtIsSmall, S: |
| fox5       | 27A | 24.84 | 88.69 | 1.97 | MultipleMeltPeaks            |
| imiR       | 27A |       |       |      | CurveFitFailed               |
| ImrA-01    | 27A | 32.27 | 82.85 | 2    |                              |
| intl       | 27A | 26.42 | 84.55 | 1.99 | MultipleMeltPeaks            |
| intl1      | 27A | 18.17 | 87.44 | 2.06 |                              |
| IS613      | 27A | 24.83 | 80    | 2.16 |                              |
| lnuA-01    | 27A |       |       |      | CurveFitFailed               |
| lnuB-01    | 27A |       |       |      | CurveFitFailed               |
| lnuB-02    | 27A |       |       |      | LowEfficiency, CtIsSmall, C: |

|                |     |       |       |      |                              |
|----------------|-----|-------|-------|------|------------------------------|
| lnuC           | 27A | 31.09 | 84.22 | 1.83 | MultipleMeltPeaks            |
| marR-01        | 27A | 32.9  | 85.54 | 1.94 |                              |
| matA/mel       | 27A | 23.41 | 77.61 | 2.07 | MultipleMeltPeaks            |
| mdet1          | 27A |       |       |      | CurveFitFailed               |
| mdtA           | 27A | 34.58 | 81.95 | 1.73 |                              |
| mdtE/yhiU      | 27A | 32.46 | 83.63 | 1.95 |                              |
| mecA           | 27A |       |       |      | LowEfficiency, CtIsSmall, S: |
| mefA           | 27A | 22.96 | 80.48 | 2    |                              |
| mepA           | 27A | 28.97 | 85.05 | 1.99 |                              |
| mexA           | 27A | 32.31 | 83.44 | 1.88 |                              |
| mexD           | 27A |       |       |      | CurveFitFailed               |
| mexE           | 27A |       |       |      | CurveFitFailed               |
| mexF           | 27A | 26.81 | 87.33 | 2.05 | MultipleMeltPeaks            |
| mphA-01        | 27A | 29.82 | 87.37 | 1.97 | MultipleMeltPeaks            |
| mphA-02        | 27A | 29.07 | 86.84 | 2.05 | MultipleMeltPeaks            |
| mphB           | 27A | 32.27 | 83.02 | 1.98 |                              |
| mphC           | 27A | 37.17 | 82.58 | 1.66 | MultipleMeltPeaks            |
| msrA-01        | 27A |       |       |      | LowEfficiency, CtIsSmall, S: |
| msrC-01        | 27A |       |       |      | NoAmplification              |
| mtrC-01        | 27A |       |       |      | NoAmplification              |
| mtrC-02        | 27A | 30.07 | 84.78 | 1.95 |                              |
| mtrD-02        | 27A | 25.21 | 84.82 | 2.04 |                              |
| mtrD-03        | 27A | 30.47 | 86.14 | 1.99 | MultipleMeltPeaks            |
| NDM1           | 27A | 38.4  | 82.04 | 1.81 | MultipleMeltPeaks            |
| nimE           | 27A |       |       |      | BadR2, LowEfficiency, CtIsS  |
| nisB           | 27A | 37.7  | 82.88 | 1.88 |                              |
| oleC           | 27A | 35.14 | 84.23 | 1.89 |                              |
| oprD           | 27A | 26.4  | 83.03 | 2.05 | MultipleMeltPeaks            |
| oprJ           | 27A | 30.13 | 88.52 | 1.95 | MultipleMeltPeaks            |
| pbp            | 27A |       |       |      | CurveFitFailed               |
| pbp2x          | 27A | 25.62 | 75.89 | 2.11 |                              |
| Pbp5           | 27A |       |       |      | LowEfficiency, CtIsSmall, Ci |
| penA           | 27A | 37.98 | 84.41 | 1.68 |                              |
| pikR1          | 27A | 36.84 | 82.74 | 1.83 | MultipleMeltPeaks            |
| pikR2          | 27A | 31.74 | 84.78 | 1.98 |                              |
| pmrA           | 27A | 25.29 | 79.97 | 2.07 |                              |
| pncA           | 27A | 36.75 | 81.31 | 1.86 | MultipleMeltPeaks            |
| putative multi | 27A | 30.49 | 84.67 | 1.97 |                              |
| qac            | 27A | 38.12 | 79.18 | 1.75 | MultipleMeltPeaks            |
| qacA           | 27A |       |       |      | CurveFitFailed               |
| qacA/qacB      | 27A | 35.26 | 87.28 | 1.58 |                              |
| qacEdelta1-0   | 27A |       |       |      | LowEfficiency, CtIsSmall, Ci |
| qacEdelta1-0   | 27A | 32.54 | 77.05 | 1.99 | MultipleMeltPeaks            |
| qacH-01        | 27A | 29.01 | 86.75 | 1.95 |                              |
| qacH-02        | 27A | 32.1  | 83.97 | 1.79 |                              |
| qnrA           | 27A | 36.69 | 80.35 | 1.85 | MultipleMeltPeaks            |

|              |     |       |       |      |                             |
|--------------|-----|-------|-------|------|-----------------------------|
| rarD-02      | 27A |       |       |      | NoAmplification             |
| sat4         | 27A |       |       |      | BadR2, LowEfficiency, CtIsS |
| sdeB         | 27A |       |       |      | CurveFitFailed              |
| spcN-01      | 27A |       |       |      | LowEfficiency, CtIsSmall, C |
| speA         | 27A |       |       |      | NoAmplification             |
| str          | 27A |       |       |      | LowEfficiency, CtIsSmall, S |
| strA         | 27A |       |       |      | LowEfficiency, CtIsSmall, S |
| strB         | 27A | 36.85 | 78.82 | 1.73 | MultipleMeltPeaks           |
| sul1         | 27A | 33.92 | 90.21 | 1.8  | MultipleMeltPeaks           |
| sul2         | 27A |       |       |      | LowEfficiency, CtIsSmall, S |
| sulA/foIP-01 | 27A | 22.36 | 82.24 | 2.02 |                             |
| sulA/foIP-03 | 27A | 23.28 | 83.1  | 2.02 |                             |
| tet(32)      | 27A | 28.67 | 81.08 | 1.99 |                             |
| tet(34)      | 27A | 31.53 | 75.84 | 2.04 |                             |
| tet(35)      | 27A | 36.58 | 75.35 | 1.9  | MultipleMeltPeaks           |
| tet(36)-A    | 27A | 36.28 | 81.99 | 1.66 | MultipleMeltPeaks           |
| tet(36)-B    | 27A | 34.92 | 78.26 | 1.89 |                             |
| tet(37)      | 27A | 28.72 | 86.38 | 2    | MultipleMeltPeaks           |
| tetA-01      | 27A | 29.1  | 85.18 | 1.9  |                             |
| tetA-02      | 27A | 36.01 | 88.19 | 1.79 | MultipleMeltPeaks           |
| tetB-01      | 27A | 21.76 | 86.27 | 2.03 | MultipleMeltPeaks           |
| tetB-02      | 27A | 20.72 | 80.06 | 2.02 |                             |
| tetC-01      | 27A | 22.28 | 75.71 | 2.06 |                             |
| tetC-02      | 27A | 20.78 | 76.42 | 2.06 |                             |
| tetD-01      | 27A |       |       |      | CurveFitFailed              |
| tetD-02      | 27A | 34.75 | 76.37 | 1.94 | MultipleMeltPeaks           |
| tetE         | 27A |       |       |      | CurveFitFailed              |
| tetG-01      | 27A | 31.61 | 85.1  | 1.92 |                             |
| tetG-02      | 27A | 38.25 | 81.03 | 1.73 | MultipleMeltPeaks           |
| tetH         | 27A |       |       |      | NoAmplification             |
| tetJ         | 27A | 32.91 | 76.09 | 2.08 |                             |
| tetK         | 27A |       |       |      | LowEfficiency, CtIsSmall, S |
| tetL-01      | 27A | 35.18 | 81.09 | 1.79 |                             |
| tetL-02      | 27A | 32.32 | 85.31 | 1.82 |                             |
| tetM-01      | 27A | 22.88 | 76.28 | 2.04 |                             |
| tetM-02      | 27A | 25.25 | 78.07 | 2    |                             |
| tetO-01      | 27A | 24.54 | 77.4  | 2.04 |                             |
| tetPA        | 27A |       |       |      | CurveFitFailed              |
| tetPB-01     | 27A | 39.05 | 83.82 | 1.81 | MultipleMeltPeaks           |
| tetPB-02     | 27A | 28.05 | 85.19 | 1.96 |                             |
| tetPB-03     | 27A |       |       |      | LowEfficiency, CtIsSmall, S |
| tetPB-05     | 27A |       |       |      | CurveFitFailed              |
| tetQ         | 27A | 26.36 | 77.17 | 2.04 |                             |
| tetR-02      | 27A | 30.21 | 85.69 | 1.93 |                             |
| tetR-03      | 27A | 22.05 | 76.48 | 1.99 |                             |
| tetS         | 27A |       |       |      | CurveFitFailed              |

|             |     |       |       |      |                                          |
|-------------|-----|-------|-------|------|------------------------------------------|
| tetT        | 27A |       |       |      | CurveFitFailed                           |
| tetU-01     | 27A |       |       |      | LowEfficiency, CtIsSmall, S <sub>e</sub> |
| tetV        | 27A |       |       |      | LowEfficiency, CtIsSmall, S <sub>e</sub> |
| tetW-01     | 27A |       |       |      | CurveFitFailed                           |
| tetX        | 27A |       |       |      | CurveFitFailed                           |
| tnpA-01     | 27A | 31.5  | 79.45 | 1.99 | MultipleMeltPeaks                        |
| tnpA-02     | 27A | 30.7  | 86.24 | 1.77 |                                          |
| tnpA-03     | 27A | 28.31 | 79    | 2.09 |                                          |
| tnpA-04     | 27A | 35.38 | 78.65 | 1.87 |                                          |
| tnpA-05     | 27A | 29.5  | 80.93 | 1.96 |                                          |
| tnpA-07     | 27A |       |       |      | LowEfficiency, CtIsSmall, S <sub>e</sub> |
| tolC-01     | 27A | 39.56 | 80.39 | 1.68 |                                          |
| tolC-02     | 27A | 27.76 | 84.79 | 1.95 | MultipleMeltPeaks                        |
| tolC-03     | 27A | 28.35 | 86.11 | 1.97 |                                          |
| Tp614       | 27A | 31.55 | 83.47 | 1.98 |                                          |
| ttgA        | 27A | 34.65 | 83.94 | 1.91 | MultipleMeltPeaks                        |
| ttgB        | 27A | 33.64 | 80.5  | 1.94 |                                          |
| vanA        | 27A |       |       |      | LowEfficiency, CtIsSmall, S <sub>e</sub> |
| vanB-01     | 27A | 30.27 | 84.13 | 2.07 |                                          |
| vanC-01     | 27A |       |       |      | LowEfficiency, CtIsSmall, S <sub>e</sub> |
| vanC-02     | 27A |       |       |      | LowEfficiency, CtIsSmall, S <sub>e</sub> |
| vanC-03     | 27A | 25.06 | 85.52 | 1.92 | MultipleMeltPeaks                        |
| vanC1       | 27A | 35.16 | 78.91 | 1.89 |                                          |
| vanC2/vanC3 | 27A | 30.29 | 84.93 | 2.12 |                                          |
| vanG        | 27A |       |       |      | BadR2, CtIsSmall, Saturatio              |
| vanHB       | 27A | 34.68 | 87.13 | 1.85 |                                          |
| vanHD       | 27A | 32.88 | 82.99 | 1.99 |                                          |
| vanRA-01    | 27A |       |       |      | CurveFitFailed                           |
| vanRA-02    | 27A |       |       |      | LowEfficiency, CtIsSmall, C <sub>i</sub> |
| vanRB       | 27A | 29.45 | 87.81 | 2.03 |                                          |
| vanRC       | 27A |       |       |      | LowEfficiency, CtIsSmall, C <sub>i</sub> |
| vanRC4      | 27A |       |       |      | CurveFitFailed                           |
| vanRD       | 27A |       |       |      | LowEfficiency, CtIsSmall, C <sub>i</sub> |
| vanSA       | 27A |       |       |      | CurveFitFailed                           |
| vanSB       | 27A | 29.05 | 75.12 | 1.84 |                                          |
| vanSC-01    | 27A | 40    | 82.42 | 1.63 | MultipleMeltPeaks                        |
| vanSC-02    | 27A |       |       |      | NoAmplification                          |
| vanTC-01    | 27A |       |       |      | CurveFitFailed                           |
| vanTC-02    | 27A | 33.6  | 82.47 | 1.9  |                                          |
| vanTE       | 27A | 34.99 | 77.92 | 1.88 |                                          |
| vanTG       | 27A |       |       |      | BadR2, CtIsSmall, Saturatio              |
| vanWB       | 27A |       |       |      | CurveFitFailed                           |
| vanWG       | 27A | 36.55 | 77.13 | 1.92 | MultipleMeltPeaks                        |
| vanXA       | 27A |       |       |      | NoAmplification                          |
| vanXB       | 27A |       |       |      | NoAmplification                          |
| vanXD       | 27A | 30.07 | 76.22 | 2.09 |                                          |

|              |     |       |       |      |                              |
|--------------|-----|-------|-------|------|------------------------------|
| vanYB        | 27A | 38.01 | 82.27 | 1.85 |                              |
| vanYD-01     | 27A | 32.65 | 82.68 | 1.82 | MultipleMeltPeaks            |
| vanYD-02     | 27A |       |       |      | LowEfficiency, CtIsSmall, S: |
| vatB-01      | 27A | 34.78 | 75.15 | 1.92 |                              |
| vatB-02      | 27A | 34.58 | 82.12 | 1.89 |                              |
| vatC-01      | 27A | 42.02 | 79.12 | 1.62 | MultipleMeltPeaks            |
| vatC-02      | 27A | 33.28 | 87.6  | 1.9  |                              |
| vatE-01      | 27A | 29.38 | 76.88 | 2.19 |                              |
| vatE-02      | 27A |       |       |      | NoAmplification              |
| vgaA-01      | 27A |       |       |      | CurveFitFailed               |
| vgaA-02      | 27A |       |       |      | CurveFitFailed               |
| vgb-01       | 27A | 33.81 | 88.29 | 1.93 | MultipleMeltPeaks            |
| vgbB-01      | 27A | 38.26 | 76.27 | 1.71 | MultipleMeltPeaks            |
| vgbB-02      | 27A |       |       |      | CurveFitFailed               |
| yceE/mdtG-0  | 27A | 32.81 | 77.64 | 2.09 |                              |
| yceE/mdtG-0  | 27A | 35.52 | 81.25 | 1.93 |                              |
| yceL/mdtH-0  | 27A | 30.11 | 86.23 | 1.95 |                              |
| yceL/mdtH-0  | 27A |       |       |      | LowEfficiency, CtIsSmall, S: |
| yceL/mdtH-0  | 27A | 32.6  | 82.27 | 2.01 | MultipleMeltPeaks            |
| yidY/mdtL-01 | 27A | 30.14 | 84.75 | 1.95 | MultipleMeltPeaks            |
| yidY/mdtL-02 | 27A |       |       |      | CurveFitFailed               |































| Assay          | Sample | Ct | Tm    | Efficiency | flag                         |
|----------------|--------|----|-------|------------|------------------------------|
| 16S rRNA       | 27B    |    | 15.28 | 81.43      | 2.09                         |
| aac            | 27B    |    | 28.78 | 87.19      | 1.87 MultipleMeltPeaks       |
| aac(6')-Ib(akε | 27B    |    |       |            | CurveFitFailed               |
| aac(6')-Ib(akε | 27B    |    | 28.58 | 87.42      | 1.98                         |
| aac(6')-Ib(akε | 27B    |    | 30.76 | 87.43      | 2.03 MultipleMeltPeaks       |
| aac(6')-II     | 27B    |    | 35.46 | 80.97      | 1.69                         |
| aac(6')I1      | 27B    |    | 39.77 | 88.78      | 1.65 MultipleMeltPeaks       |
| aacA/aphD      | 27B    |    |       |            | LowEfficiency, CtIsSmall, Sε |
| aacC           | 27B    |    | 29.6  | 87.66      | 1.95 MultipleMeltPeaks       |
| aacC1          | 27B    |    |       |            | LowEfficiency, CtIsSmall, Sε |
| aacC2          | 27B    |    |       |            | NoAmplification              |
| aacC4          | 27B    |    | 33.38 | 89.52      | 1.93                         |
| aadA-01        | 27B    |    |       |            | CurveFitFailed               |
| aadA-02        | 27B    |    | 35.06 | 80.43      | 1.94                         |
| aadA-1-01      | 27B    |    | 34.71 | 86.51      | 1.92 MultipleMeltPeaks       |
| aadA-1-02      | 27B    |    |       |            | CurveFitFailed               |
| aadA1          | 27B    |    | 33.34 | 85.78      | 1.94                         |
| aadA2-01       | 27B    |    | 41.72 | 77.49      | 1.54 MultipleMeltPeaks       |
| aadA2-02       | 27B    |    | 30.83 | 75.76      | 1.98                         |
| aadA2-03       | 27B    |    |       |            | NoAmplification              |
| aadA5-01       | 27B    |    | 35.75 | 84.36      | 1.82 MultipleMeltPeaks       |
| aadA5-02       | 27B    |    | 31.35 | 86.72      | 1.89                         |
| aadA9-01       | 27B    |    | 35.96 | 85.08      | 1.86                         |
| aadA9-02       | 27B    |    | 38.25 | 73.98      | 1.85                         |
| aadD           | 27B    |    |       |            | LowEfficiency, CtIsSmall, Sε |
| aadE           | 27B    |    |       |            | CurveFitFailed               |
| acrA-01        | 27B    |    | 32.12 | 89.16      | 1.91                         |
| acrA-02        | 27B    |    | 40.61 | 64.43      | 1.65 MultipleMeltPeaks       |
| acrA-03        | 27B    |    | 36.81 | 74.47      | 1.83                         |
| acrA-04        | 27B    |    | 30.3  | 80.76      | 1.99                         |
| acrA-05        | 27B    |    | 27.51 | 89.3       | 1.92                         |
| acrB-01        | 27B    |    | 34.15 | 88.39      | 1.89                         |
| acrF           | 27B    |    | 30.71 | 85.98      | 2.01                         |
| acrR-01        | 27B    |    | 33.32 | 85.24      | 1.94                         |
| acrR-02        | 27B    |    | 30.71 | 86.21      | 2.01                         |
| Actin          | 27B    |    | 21.65 | 87.01      | 1.98                         |
| adeA           | 27B    |    | 39.84 | 82.81      | 1.73 MultipleMeltPeaks       |
| ampC-01        | 27B    |    | 36.22 | 87.59      | 1.76                         |
| ampC-02        | 27B    |    |       |            | CurveFitFailed               |
| ampC-04        | 27B    |    | 31.31 | 79.19      | 1.94 MultipleMeltPeaks       |
| ampC-05        | 27B    |    |       |            | LowEfficiency, CtIsSmall, Cι |
| ampC-06        | 27B    |    | 38.13 | 83.41      | 1.74                         |
| ampC-07        | 27B    |    | 31.25 | 88.37      | 1.88                         |
| ampC-09        | 27B    |    |       |            | LowEfficiency, CtIsSmall, Cι |
| ampC/blaDH     | 27B    |    | 27.5  | 85.13      | 2.01                         |

|               |     |       |       |      |                             |
|---------------|-----|-------|-------|------|-----------------------------|
| aph           | 27B |       |       |      | BadR2, LowEfficiency, CtIsS |
| aph(2')-Id-01 | 27B |       |       |      | CurveFitFailed              |
| aph(2')-Id-02 | 27B |       |       |      | LowEfficiency, CtIsSmall, S |
| aph6ia        | 27B | 33.04 | 78.32 | 1.98 |                             |
| aphA1(aka k   | 27B |       |       |      | LowEfficiency, CtIsSmall, S |
| bacA-01       | 27B | 36.21 | 73.82 | 1.83 | MultipleMeltPeaks           |
| bacA-02       | 27B | 30.64 | 88.42 | 1.81 |                             |
| BETA-globin   | 27B | 22.18 | 84.08 | 2    |                             |
| bla-ACC-1     | 27B | 31.92 | 89.46 | 1.97 |                             |
| bla-L1        | 27B | 27.91 | 85.57 | 2.01 |                             |
| bla1          | 27B |       |       |      | LowEfficiency, CtIsSmall, C |
| blaCMY        | 27B | 33.44 | 81.1  | 1.95 |                             |
| blaCMY2-01    | 27B | 34.65 | 83.36 | 1.94 |                             |
| blaCMY2-02    | 27B | 27.3  | 85.39 | 2.01 |                             |
| blaCTX-M-01   | 27B | 36.66 | 87.54 | 1.81 | MultipleMeltPeaks           |
| blaCTX-M-02   | 27B | 29.04 | 85.65 | 1.9  | MultipleMeltPeaks           |
| blaCTX-M-03   | 27B |       |       |      | CurveFitFailed              |
| blaCTX-M-04   | 27B | 29.8  | 90.79 | 1.82 |                             |
| blaCTX-M-05   | 27B | 33.48 | 76.03 | 1.8  |                             |
| blaCTX-M-06   | 27B | 38.13 | 76.21 | 1.82 |                             |
| blaGES        | 27B |       |       |      | NoAmplification             |
| blaIMP-01     | 27B | 35.61 | 77.72 | 1.95 |                             |
| blaIMP-02     | 27B | 35.75 | 81.11 | 1.91 |                             |
| blaMOX/blaC   | 27B | 35.82 | 88.34 | 1.82 |                             |
| blaOCH        | 27B | 30    | 82.72 | 2.1  |                             |
| blaOKP        | 27B |       |       |      | NoAmplification             |
| blaOXA1/blaC  | 27B |       |       |      | LowEfficiency, CtIsSmall, S |
| blaOXA10-01   | 27B | 39.47 | 76.88 | 1.8  |                             |
| blaOXA10-02   | 27B |       |       |      | CurveFitFailed              |
| blaOXY        | 27B | 32.8  | 87.88 | 1.82 |                             |
| blaPAO        | 27B | 37.78 | 80.93 | 1.77 | MultipleMeltPeaks           |
| blaPER        | 27B | 38.36 | 78.45 | 1.81 | MultipleMeltPeaks           |
| blaPSE        | 27B |       |       |      | NoAmplification             |
| blaROB        | 27B |       |       |      | NoAmplification             |
| blaSFO        | 27B | 28.64 | 88.25 | 1.94 | MultipleMeltPeaks           |
| blaSHV-01     | 27B | 32.34 | 86.83 | 1.95 | MultipleMeltPeaks           |
| blaSHV-02     | 27B | 32.9  | 83.23 | 2.05 |                             |
| blaTEM        | 27B | 33.56 | 87.25 | 2.02 | MultipleMeltPeaks           |
| blaTLA        | 27B |       |       |      | CurveFitFailed              |
| blaVEB        | 27B |       |       |      | LowEfficiency, CtIsSmall, C |
| blaVIM        | 27B |       |       |      | BadR2, LowEfficiency, CtIsS |
| blaZ          | 27B |       |       |      | NoAmplification             |
| carB          | 27B | 34.72 | 86.79 | 1.84 |                             |
| catA1         | 27B |       |       |      | NoAmplification             |
| catB3         | 27B | 35.95 | 87.65 | 1.8  | MultipleMeltPeaks           |
| catB8         | 27B | 27.58 | 82.62 | 1.99 |                             |

|            |     |       |       |      |                              |
|------------|-----|-------|-------|------|------------------------------|
| ceoA       | 27B | 26.33 | 87.36 | 1.96 | MultipleMeltPeaks            |
| cepA       | 27B | 37.09 | 83.2  | 1.9  |                              |
| cfiA       | 27B | 29.73 | 87.79 | 2    |                              |
| cfr        | 27B |       |       |      | CurveFitFailed               |
| cfxA       | 27B | 26.44 | 77.82 | 2.08 |                              |
| cmeA       | 27B |       |       |      | LowEfficiency, CtIsSmall, S: |
| cmlA1-01   | 27B | 32.03 | 85.07 | 1.94 |                              |
| cmlA1-02   | 27B | 29.79 | 88.32 | 1.98 |                              |
| cmr        | 27B | 36.55 | 78.78 | 1.83 |                              |
| cmx(A)     | 27B | 27.54 | 84.49 | 2.01 |                              |
| cphA-01    | 27B | 28.59 | 85.73 | 1.96 |                              |
| cphA-02    | 27B | 31.76 | 82.71 | 1.96 |                              |
| dfrA1      | 27B | 37.07 | 78.78 | 1.81 |                              |
| dfrA12     | 27B | 33.35 | 87.01 | 1.85 |                              |
| emrD       | 27B | 33.06 | 86.24 | 1.9  |                              |
| ereA       | 27B | 37.2  | 83.68 | 1.76 |                              |
| ereB       | 27B | 32.61 | 81.16 | 2.03 |                              |
| erm(34)    | 27B | 36.22 | 87.19 | 1.82 |                              |
| erm(35)    | 27B |       |       |      | LowEfficiency, CtIsSmall, C: |
| erm(36)    | 27B | 30.77 | 85.9  | 2.17 |                              |
| ermA       | 27B |       |       |      | CurveFitFailed               |
| ermA/ermTR | 27B | 35.43 | 82.32 | 1.89 |                              |
| ermB       | 27B | 20.33 | 75.17 | 2.21 |                              |
| ermC       | 27B | 35.5  | 85.5  | 1.95 |                              |
| ermF       | 27B |       |       |      | CurveFitFailed               |
| ermJ/ermD  | 27B |       |       |      | LowEfficiency, CtIsSmall, S: |
| ermK-01    | 27B | 33.85 | 75.09 | 2.03 |                              |
| ermK-02    | 27B | 33.07 | 80.89 | 1.88 | MultipleMeltPeaks            |
| ermT-01    | 27B |       |       |      | BadR2, LowEfficiency, CtIsS  |
| ermT-02    | 27B | 38.18 | 71.53 | 1.94 |                              |
| ermX       | 27B | 34.6  | 86.12 | 1.75 |                              |
| ermY       | 27B |       |       |      | BadR2, LowEfficiency, CtIsS  |
| fabK       | 27B | 25.74 | 79.28 | 2.06 |                              |
| floR       | 27B | 33.9  | 89.61 | 1.81 |                              |
| folA       | 27B |       |       |      | NoAmplification              |
| fosB       | 27B |       |       |      | CurveFitFailed               |
| fosX       | 27B |       |       |      | CurveFitFailed               |
| fox5       | 27B | 26.09 | 87.54 | 1.93 | MultipleMeltPeaks            |
| imiR       | 27B |       |       |      | NoAmplification              |
| ImrA-01    | 27B | 35.16 | 83.55 | 1.93 |                              |
| intl       | 27B | 26.88 | 88.98 | 2    | MultipleMeltPeaks            |
| intl1      | 27B | 18.94 | 87.28 | 2.01 |                              |
| IS613      | 27B | 23.53 | 80.21 | 2.12 |                              |
| lnuA-01    | 27B |       |       |      | CurveFitFailed               |
| lnuB-01    | 27B |       |       |      | LowEfficiency, CtIsSmall, S: |
| lnuB-02    | 27B |       |       |      | CurveFitFailed               |

|                |     |       |       |      |                              |
|----------------|-----|-------|-------|------|------------------------------|
| lnuC           | 27B | 31.13 | 87.94 | 1.83 |                              |
| marR-01        | 27B | 30.05 | 85.42 | 1.99 |                              |
| matA/mel       | 27B | 22.33 | 77.81 | 2.07 |                              |
| mdet1          | 27B |       |       |      | NoAmplification              |
| mdtA           | 27B | 33.26 | 84.08 | 1.87 |                              |
| mdtE/yhiU      | 27B | 33.06 | 90.49 | 1.91 |                              |
| mecA           | 27B |       |       |      | NoAmplification              |
| mefA           | 27B | 21.34 | 80.46 | 2.01 | MultipleMeltPeaks            |
| mepA           | 27B | 31.81 | 87.32 | 1.94 |                              |
| mexA           | 27B | 33.78 | 83.2  | 1.89 |                              |
| mexD           | 27B | 37.22 | 77.12 | 1.89 | MultipleMeltPeaks            |
| mexE           | 27B | 34.98 | 83.55 | 1.85 |                              |
| mexF           | 27B | 27.59 | 87.88 | 2.08 |                              |
| mphA-01        | 27B | 29.45 | 87.6  | 1.98 |                              |
| mphA-02        | 27B | 29.82 | 87.01 | 1.62 |                              |
| mphB           | 27B | 34.29 | 84.79 | 1.88 |                              |
| mphC           | 27B | 38.89 | 78.64 | 1.64 | MultipleMeltPeaks            |
| msrA-01        | 27B |       |       |      | CurveFitFailed               |
| msrC-01        | 27B |       |       |      | NoAmplification              |
| mtrC-01        | 27B | 32.2  | 83.5  | 2.04 |                              |
| mtrC-02        | 27B | 31.11 | 84.42 | 2.02 |                              |
| mtrD-02        | 27B | 24.76 | 82.97 | 2.06 | MultipleMeltPeaks            |
| mtrD-03        | 27B | 32.27 | 86.52 | 1.99 |                              |
| NDM1           | 27B |       |       |      | CurveFitFailed               |
| nimE           | 27B |       |       |      | CurveFitFailed               |
| nisB           | 27B |       |       |      | LowEfficiency, CtIsSmall, Ci |
| oleC           | 27B | 36.92 | 84.68 | 1.8  | MultipleMeltPeaks            |
| oprD           | 27B | 26.21 | 81.92 | 2    | MultipleMeltPeaks            |
| oprJ           | 27B | 30.68 | 91.47 | 2.03 |                              |
| pbp            | 27B |       |       |      | BadR2, LowEfficiency, CtIsS  |
| pbp2x          | 27B | 27.88 | 75.47 | 2.11 |                              |
| Pbp5           | 27B |       |       |      | CurveFitFailed               |
| penA           | 27B | 33.24 | 87.97 | 1.8  |                              |
| pikR1          | 27B |       |       |      | NoAmplification              |
| pikR2          | 27B | 29.09 | 85.15 | 2.01 |                              |
| pmrA           | 27B | 23.5  | 79.75 | 2.11 |                              |
| pncA           | 27B | 35.58 | 75.65 | 1.92 |                              |
| putative multi | 27B | 29.46 | 84.75 | 1.97 |                              |
| qac            | 27B | 38.36 | 79.39 | 1.78 | MultipleMeltPeaks            |
| qacA           | 27B |       |       |      | CurveFitFailed               |
| qacA/qacB      | 27B | 36.61 | 85.12 | 1.53 | MultipleMeltPeaks            |
| qacEdelta1-0   | 27B |       |       |      | BadR2, LowEfficiency, CtIsS  |
| qacEdelta1-0   | 27B | 32.85 | 78.81 | 1.98 |                              |
| qacH-01        | 27B | 31.62 | 86.72 | 1.91 |                              |
| qacH-02        | 27B | 31.05 | 86.43 | 1.82 | MultipleMeltPeaks            |
| qnrA           | 27B | 36.92 | 80.37 | 1.86 |                              |



|              |     |       |       |      |                             |
|--------------|-----|-------|-------|------|-----------------------------|
| rarD-02      | 27B | 34.61 | 83.63 | 1.94 |                             |
| sat4         | 27B |       |       |      | BadR2, LowEfficiency, CtIsS |
| sdeB         | 27B |       |       |      | LowEfficiency, CtIsSmall, S |
| spcN-01      | 27B |       |       |      | NoAmplification             |
| speA         | 27B |       |       |      | NoAmplification             |
| str          | 27B |       |       |      | LowEfficiency, CtIsSmall, C |
| strA         | 27B |       |       |      | LowEfficiency, CtIsSmall, C |
| strB         | 27B |       |       |      | CurveFitFailed              |
| sul1         | 27B | 35.14 | 89.94 | 1.79 | MultipleMeltPeaks           |
| sul2         | 27B |       |       |      | CurveFitFailed              |
| sulA/foIP-01 | 27B | 23.79 | 81.3  | 1.97 |                             |
| sulA/foIP-03 | 27B | 21.24 | 83.16 | 2.08 |                             |
| tet(32)      | 27B |       |       |      | NoAmplification             |
| tet(34)      | 27B | 29.61 | 76.03 | 2.02 |                             |
| tet(35)      | 27B | 37.49 | 75.73 | 2.07 | MultipleMeltPeaks           |
| tet(36)-A    | 27B | 35.71 | 81.97 | 1.82 |                             |
| tet(36)-B    | 27B |       |       |      | CurveFitFailed              |
| tet(37)      | 27B | 27.72 | 75.43 | 1.98 | MultipleMeltPeaks           |
| tetA-01      | 27B | 28.75 | 85.17 | 1.88 |                             |
| tetA-02      | 27B | 35.06 | 79.9  | 1.87 | MultipleMeltPeaks           |
| tetB-01      | 27B | 20.54 | 80.13 | 2.03 | MultipleMeltPeaks           |
| tetB-02      | 27B | 17.54 | 80.09 | 2.07 |                             |
| tetC-01      | 27B | 21.14 | 75.8  | 2.07 |                             |
| tetC-02      | 27B | 17.58 | 76.32 | 2.13 |                             |
| tetD-01      | 27B |       |       |      | BadR2, LowEfficiency, CtIsS |
| tetD-02      | 27B | 41.79 | 75.57 | 1.67 | MultipleMeltPeaks           |
| tetE         | 27B |       |       |      | NoAmplification             |
| tetG-01      | 27B | 31.46 | 86.51 | 1.94 |                             |
| tetG-02      | 27B | 38.17 | 80.78 | 1.87 |                             |
| tetH         | 27B |       |       |      | LowEfficiency, CtIsSmall, C |
| tetJ         | 27B |       |       |      | CurveFitFailed              |
| tetK         | 27B | 28.9  | 72.52 | 2.02 |                             |
| tetL-01      | 27B | 35.94 | 81.26 | 1.78 | MultipleMeltPeaks           |
| tetL-02      | 27B | 31.75 | 85.32 | 1.81 |                             |
| tetM-01      | 27B | 20.14 | 76.33 | 2.07 |                             |
| tetM-02      | 27B | 22.41 | 78.16 | 2.02 |                             |
| tetO-01      | 27B | 24.22 | 77.49 | 2.03 |                             |
| tetPA        | 27B |       |       |      | NoAmplification             |
| tetPB-01     | 27B |       |       |      | NoAmplification             |
| tetPB-02     | 27B | 28.32 | 85.24 | 1.97 |                             |
| tetPB-03     | 27B |       |       |      | LowEfficiency, CtIsSmall, C |
| tetPB-05     | 27B |       |       |      | CurveFitFailed              |
| tetQ         | 27B | 22.75 | 77.14 | 2.13 |                             |
| tetR-02      | 27B | 31.25 | 87.49 | 1.97 |                             |
| tetR-03      | 27B | 17.44 | 76.48 | 2.07 |                             |
| tetS         | 27B | 39.29 | 85.51 | 1.85 | MultipleMeltPeaks           |

|             |     |       |       |      |                                          |
|-------------|-----|-------|-------|------|------------------------------------------|
| tetT        | 27B |       |       |      | CurveFitFailed                           |
| tetU-01     | 27B |       |       |      | LowEfficiency, CtIsSmall, S <sub>c</sub> |
| tetV        | 27B |       |       |      | LowEfficiency, CtIsSmall, S <sub>c</sub> |
| tetW-01     | 27B |       |       |      | BadR2, LowEfficiency, CtIsS              |
| tetX        | 27B |       |       |      | CurveFitFailed                           |
| tnpA-01     | 27B | 34.8  | 84.03 | 1.95 |                                          |
| tnpA-02     | 27B | 31.15 | 85.98 | 1.88 |                                          |
| tnpA-03     | 27B | 34.49 | 74.8  | 2    |                                          |
| tnpA-04     | 27B | 34.6  | 78.64 | 1.92 |                                          |
| tnpA-05     | 27B | 36.39 | 75.89 | 1.85 |                                          |
| tnpA-07     | 27B |       |       |      | LowEfficiency, CtIsSmall, S <sub>c</sub> |
| tolC-01     | 27B | 38.58 | 79.87 | 1.73 |                                          |
| tolC-02     | 27B | 27.56 | 84.25 | 1.96 | MultipleMeltPeaks                        |
| tolC-03     | 27B | 30.46 | 84.48 | 1.96 |                                          |
| Tp614       | 27B | 35.16 | 83.67 | 1.87 |                                          |
| ttgA        | 27B | 33.25 | 87.4  | 1.88 | MultipleMeltPeaks                        |
| ttgB        | 27B | 32.93 | 84.41 | 2.07 |                                          |
| vanA        | 27B |       |       |      | NoAmplification                          |
| vanB-01     | 27B | 32.03 | 84.37 | 2.02 | MultipleMeltPeaks                        |
| vanC-01     | 27B |       |       |      | CurveFitFailed                           |
| vanC-02     | 27B |       |       |      | LowEfficiency, CtIsSmall, C <sub>i</sub> |
| vanC-03     | 27B | 24.76 | 85.52 | 1.93 | MultipleMeltPeaks                        |
| vanC1       | 27B |       |       |      | CurveFitFailed                           |
| vanC2/vanC3 | 27B | 32.13 | 83.83 | 2.09 |                                          |
| vanG        | 27B |       |       |      | NoAmplification                          |
| vanHB       | 27B | 38.89 | 82.48 | 1.69 | MultipleMeltPeaks                        |
| vanHD       | 27B | 34.57 | 82.92 | 1.92 |                                          |
| vanRA-01    | 27B |       |       |      | LowEfficiency, CtIsSmall, C <sub>i</sub> |
| vanRA-02    | 27B | 39.11 | 76.3  | 1.76 | MultipleMeltPeaks                        |
| vanRB       | 27B | 28.37 | 87.67 | 1.99 |                                          |
| vanRC       | 27B |       |       |      | LowEfficiency, CtIsSmall, C <sub>i</sub> |
| vanRC4      | 27B |       |       |      | LowEfficiency, CtIsSmall, C <sub>i</sub> |
| vanRD       | 27B |       |       |      | CtIsSmall, SaturationBaseli              |
| vanSA       | 27B |       |       |      | LowEfficiency, CtIsSmall, S <sub>c</sub> |
| vanSB       | 27B | 34.29 | 74.67 | 1.88 |                                          |
| vanSC-01    | 27B | 32.49 | 84.4  | 2    |                                          |
| vanSC-02    | 27B | 33.02 | 76.43 | 1.9  |                                          |
| vanTC-01    | 27B |       |       |      | LowEfficiency, CtIsSmall, S <sub>c</sub> |
| vanTC-02    | 27B | 32.5  | 88.71 | 1.87 | MultipleMeltPeaks                        |
| vanTE       | 27B | 36.73 | 78.02 | 1.8  |                                          |
| vanTG       | 27B |       |       |      | CurveFitFailed                           |
| vanWB       | 27B |       |       |      | LowEfficiency, CtIsSmall, C <sub>i</sub> |
| vanWG       | 27B | 36.47 | 75.02 | 1.91 |                                          |
| vanXA       | 27B |       |       |      | CurveFitFailed                           |
| vanXB       | 27B |       |       |      | NoAmplification                          |
| vanXD       | 27B | 31.25 | 76.06 | 2.07 |                                          |

|              |     |       |       |      |                              |
|--------------|-----|-------|-------|------|------------------------------|
| vanYB        | 27B | 38.71 | 79.83 | 1.89 |                              |
| vanYD-01     | 27B | 33    | 86.34 | 1.88 | MultipleMeltPeaks            |
| vanYD-02     | 27B | 38.47 | 80.32 | 1.86 |                              |
| vatB-01      | 27B | 36.16 | 75.35 | 1.89 |                              |
| vatB-02      | 27B | 34.38 | 80.56 | 1.98 | MultipleMeltPeaks            |
| vatC-01      | 27B |       |       |      | CurveFitFailed               |
| vatC-02      | 27B | 33.48 | 87.47 | 1.9  |                              |
| vatE-01      | 27B | 30.24 | 77.15 | 2.15 |                              |
| vatE-02      | 27B |       |       |      | NoAmplification              |
| vgaA-01      | 27B |       |       |      | CurveFitFailed               |
| vgaA-02      | 27B |       |       |      | CurveFitFailed               |
| vgb-01       | 27B | 34.79 | 74.29 | 1.93 | MultipleMeltPeaks            |
| vgbB-01      | 27B | 38.36 | 76.3  | 1.62 |                              |
| vgbB-02      | 27B |       |       |      | CurveFitFailed               |
| yceE/mdtG-0  | 27B |       |       |      | LowEfficiency, CtIsSmall, S: |
| yceE/mdtG-0  | 27B | 35.76 | 81.29 | 1.88 |                              |
| yceL/mdtH-0  | 27B | 28.1  | 87.93 | 2    |                              |
| yceL/mdtH-0  | 27B |       |       |      | NoAmplification              |
| yceL/mdtH-0  | 27B | 33.42 | 88.42 | 1.96 | MultipleMeltPeaks            |
| yidY/mdtL-01 | 27B | 32.59 | 84.53 | 1.96 | MultipleMeltPeaks            |
| yidY/mdtL-02 | 27B |       |       |      | CurveFitFailed               |































| Assay          | Sample | Ct    | Tm    | Efficiency | flag                         |
|----------------|--------|-------|-------|------------|------------------------------|
| 16S rRNA       | 27C    |       | 15.13 | 82.44      | 1.96                         |
| aac            | 27C    |       |       |            | NoAmplification              |
| aac(6')-Ib(akε | 27C    |       |       |            | NoAmplification              |
| aac(6')-Ib(akε | 27C    |       |       |            | NoAmplification              |
| aac(6')-Ib(akε | 27C    |       |       |            | NoAmplification              |
| aac(6')-II     | 27C    |       |       |            | NoAmplification              |
| aac(6')I1      | 27C    |       |       |            | NoAmplification              |
| aacA/aphD      | 27C    |       |       |            | NoAmplification              |
| aacC           | 27C    | 32.33 | 82.15 | 1.94       |                              |
| aacC1          | 27C    |       |       |            | NoAmplification              |
| aacC2          | 27C    |       |       |            | NoAmplification              |
| aacC4          | 27C    |       |       |            | NoAmplification              |
| aadA-01        | 27C    |       |       |            | NoAmplification              |
| aadA-02        | 27C    |       |       |            | NoAmplification              |
| aadA-1-01      | 27C    | 37.26 | 79.02 | 1.92       |                              |
| aadA-1-02      | 27C    |       |       |            | NoAmplification              |
| aadA1          | 27C    | 39.3  | 83.47 | 1.78       |                              |
| aadA2-01       | 27C    |       |       |            | NoAmplification              |
| aadA2-02       | 27C    |       |       |            | NoAmplification              |
| aadA2-03       | 27C    |       |       |            | NoAmplification              |
| aadA5-01       | 27C    |       |       |            | NoAmplification              |
| aadA5-02       | 27C    |       |       |            | NoAmplification              |
| aadA9-01       | 27C    |       |       |            | NoAmplification              |
| aadA9-02       | 27C    |       |       |            | NoAmplification              |
| aadD           | 27C    |       |       |            | NoAmplification              |
| aadE           | 27C    |       |       |            | NoAmplification              |
| acrA-01        | 27C    |       |       |            | NoAmplification              |
| acrA-02        | 27C    | 31.34 | 79.97 | 1.93       | MultipleMeltPeaks            |
| acrA-03        | 27C    |       |       |            | NoAmplification              |
| acrA-04        | 27C    | 32.71 | 85.51 | 1.96       |                              |
| acrA-05        | 27C    | 32.78 | 82.98 | 1.87       | MultipleMeltPeaks            |
| acrB-01        | 27C    |       |       |            | NoAmplification              |
| acrF           | 27C    |       |       |            | HighEfficiency, CurveFitFail |
| acrR-01        | 27C    | 30.27 | 80.9  | 1.92       |                              |
| acrR-02        | 27C    |       |       |            | CurveFitFailed               |
| Actin          | 27C    | 24.91 | 87.19 | 1.9        | MultipleMeltPeaks            |
| adeA           | 27C    |       |       |            | NoAmplification              |
| ampC-01        | 27C    |       |       |            | NoAmplification              |
| ampC-02        | 27C    | 43.62 | 61.59 | 1.75       | MultipleMeltPeaks            |
| ampC-04        | 27C    | 35.3  | 77.93 | 2.03       |                              |
| ampC-05        | 27C    |       |       |            | NoAmplification              |
| ampC-06        | 27C    |       |       |            | NoAmplification              |
| ampC-07        | 27C    |       |       |            | NoAmplification              |
| ampC-09        | 27C    |       |       |            | NoAmplification              |
| ampC/blaDH     | 27C    |       |       |            | NoAmplification              |

|                          |     |       |       |      |                   |
|--------------------------|-----|-------|-------|------|-------------------|
| aph                      | 27C |       |       |      | NoAmplification   |
| aph(2')-Id-01            | 27C |       |       |      | NoAmplification   |
| aph(2')-Id-02            | 27C |       |       |      | NoAmplification   |
| aph6ia                   | 27C |       |       |      | CurveFitFailed    |
| aphA1(aka k <sub>e</sub> | 27C | 27.6  | 76.74 | 2.06 |                   |
| bacA-01                  | 27C |       |       |      | NoAmplification   |
| bacA-02                  | 27C | 28.26 | 82.54 | 2.01 |                   |
| BETA-globin              | 27C | 26.91 | 84.35 | 1.97 |                   |
| bla-ACC-1                | 27C |       |       |      | NoAmplification   |
| bla-L1                   | 27C | 36.02 | 88.44 | 1.81 |                   |
| bla1                     | 27C |       |       |      | NoAmplification   |
| blaCMY                   | 27C | 35    | 80.21 | 1.9  |                   |
| blaCMY2-01               | 27C |       |       |      | NoAmplification   |
| blaCMY2-02               | 27C | 38.66 | 81.19 | 1.88 |                   |
| blaCTX-M-01              | 27C | 29.53 | 87.97 | 1.97 |                   |
| blaCTX-M-02              | 27C | 37.82 | 83.83 | 1.88 | MultipleMeltPeaks |
| blaCTX-M-03              | 27C |       |       |      | NoAmplification   |
| blaCTX-M-04              | 27C | 35.19 | 84.73 | 1.84 | MultipleMeltPeaks |
| blaCTX-M-05              | 27C | 30.69 | 77.18 | 1.77 |                   |
| blaCTX-M-06              | 27C |       |       |      | NoAmplification   |
| blaGES                   | 27C |       |       |      | NoAmplification   |
| blaIMP-01                | 27C |       |       |      | NoAmplification   |
| blaIMP-02                | 27C |       |       |      | NoAmplification   |
| blaMOX/blaC              | 27C |       |       |      | NoAmplification   |
| blaOCH                   | 27C |       |       |      | NoAmplification   |
| blaOKP                   | 27C |       |       |      | NoAmplification   |
| blaOXA1/blaC             | 27C |       |       |      | NoAmplification   |
| blaOXA10-01              | 27C |       |       |      | NoAmplification   |
| blaOXA10-02              | 27C |       |       |      | NoAmplification   |
| blaOXY                   | 27C |       |       |      | CurveFitFailed    |
| blaPAO                   | 27C |       |       |      | NoAmplification   |
| blaPER                   | 27C | 34.62 | 70.43 | 1.65 |                   |
| blaPSE                   | 27C |       |       |      | NoAmplification   |
| blaROB                   | 27C |       |       |      | NoAmplification   |
| blaSFO                   | 27C | 30.29 | 84.47 | 1.89 |                   |
| blaSHV-01                | 27C |       |       |      | NoAmplification   |
| blaSHV-02                | 27C |       |       |      | NoAmplification   |
| blaTEM                   | 27C | 27.04 | 79.26 | 2.02 |                   |
| blaTLA                   | 27C |       |       |      | NoAmplification   |
| blaVEB                   | 27C |       |       |      | NoAmplification   |
| blaVIM                   | 27C | 37.39 | 81.58 | 2.14 |                   |
| blaZ                     | 27C | 28.2  | 75.2  | 2.03 |                   |
| carB                     | 27C |       |       |      | NoAmplification   |
| catA1                    | 27C |       |       |      | NoAmplification   |
| catB3                    | 27C |       |       |      | NoAmplification   |
| catB8                    | 27C | 32.35 | 82.03 | 1.93 |                   |

|            |     |       |       |      |                              |
|------------|-----|-------|-------|------|------------------------------|
| ceoA       | 27C | 36.83 | 82.68 | 1.76 |                              |
| cepA       | 27C |       |       |      | NoAmplification              |
| cfiA       | 27C |       |       |      | NoAmplification              |
| cfr        | 27C |       |       |      | NoAmplification              |
| cfxA       | 27C | 25.43 | 77.91 | 2.04 |                              |
| cmeA       | 27C |       |       |      | NoAmplification              |
| cmlA1-01   | 27C | 36.8  | 88.02 | 1.91 | MultipleMeltPeaks            |
| cmlA1-02   | 27C | 34.93 | 89.74 | 1.84 | MultipleMeltPeaks            |
| cmr        | 27C |       |       |      | NoAmplification              |
| cmx(A)     | 27C | 29.29 | 85.36 | 1.91 |                              |
| cphA-01    | 27C | 35.47 | 83.1  | 1.86 | MultipleMeltPeaks            |
| cphA-02    | 27C |       |       |      | CurveFitFailed               |
| dfrA1      | 27C |       |       |      | NoAmplification              |
| dfrA12     | 27C |       |       |      | CurveFitFailed               |
| emrD       | 27C |       |       |      | CurveFitFailed               |
| ereA       | 27C |       |       |      | NoAmplification              |
| ereB       | 27C | 32.99 | 88.41 | 1.87 |                              |
| erm(34)    | 27C |       |       |      | NoAmplification              |
| erm(35)    | 27C |       |       |      | NoAmplification              |
| erm(36)    | 27C | 33.13 | 85.97 | 2.04 |                              |
| ermA       | 27C |       |       |      | NoAmplification              |
| ermA/ermTR | 27C |       |       |      | NoAmplification              |
| ermB       | 27C | 18.49 | 75.3  | 2.07 |                              |
| ermC       | 27C | 29.56 | 75.83 | 2.07 |                              |
| ermF       | 27C |       |       |      | NoAmplification              |
| ermJ/ermD  | 27C |       |       |      | NoAmplification              |
| ermK-01    | 27C |       |       |      | NoAmplification              |
| ermK-02    | 27C |       |       |      | NoAmplification              |
| ermT-01    | 27C |       |       |      | NoAmplification              |
| ermT-02    | 27C |       |       |      | NoAmplification              |
| ermX       | 27C |       |       |      | NoAmplification              |
| ermY       | 27C |       |       |      | NoAmplification              |
| fabK       | 27C | 24.58 | 79.4  | 2.08 |                              |
| floR       | 27C |       |       |      | NoAmplification              |
| folA       | 27C |       |       |      | NoAmplification              |
| fosB       | 27C |       |       |      | LowEfficiency, CtIsSmall, S: |
| fosX       | 27C |       |       |      | NoAmplification              |
| fox5       | 27C | 31.39 | 78.45 | 1.91 | MultipleMeltPeaks            |
| imiR       | 27C |       |       |      | CurveFitFailed               |
| ImrA-01    | 27C |       |       |      | NoAmplification              |
| intl       | 27C |       |       |      | CurveFitFailed               |
| intl1      | 27C | 23.62 | 86.96 | 1.98 |                              |
| IS613      | 27C | 23.43 | 79.95 | 2.07 |                              |
| lnuA-01    | 27C |       |       |      | NoAmplification              |
| lnuB-01    | 27C |       |       |      | NoAmplification              |
| lnuB-02    | 27C |       |       |      | NoAmplification              |

|                |     |       |       |      |                   |
|----------------|-----|-------|-------|------|-------------------|
| lnuC           | 27C |       |       |      | NoAmplification   |
| marR-01        | 27C |       |       |      | CurveFitFailed    |
| matA/mel       | 27C | 18.91 | 78.01 | 2.05 |                   |
| mdet1          | 27C |       |       |      | NoAmplification   |
| mdtA           | 27C | 36.98 | 61.99 | 2.18 | MultipleMeltPeaks |
| mdtE/yhiU      | 27C |       |       |      | CurveFitFailed    |
| mecA           | 27C |       |       |      | NoAmplification   |
| mefA           | 27C | 18.28 | 80.61 | 1.97 | MultipleMeltPeaks |
| mepA           | 27C | 31.53 | 87.53 | 1.98 |                   |
| mexA           | 27C | 35.4  | 76.45 | 1.95 |                   |
| mexD           | 27C |       |       |      | NoAmplification   |
| mexE           | 27C |       |       |      | NoAmplification   |
| mexF           | 27C | 28.48 | 83.23 | 1.98 |                   |
| mphA-01        | 27C | 34.26 | 79.63 | 1.99 |                   |
| mphA-02        | 27C | 32.77 | 91.09 | 1.7  |                   |
| mphB           | 27C |       |       |      | NoAmplification   |
| mphC           | 27C |       |       |      | NoAmplification   |
| msrA-01        | 27C |       |       |      | NoAmplification   |
| msrC-01        | 27C |       |       |      | NoAmplification   |
| mtrC-01        | 27C |       |       |      | NoAmplification   |
| mtrC-02        | 27C |       |       |      | NoAmplification   |
| mtrD-02        | 27C | 30.32 | 81.65 | 1.99 |                   |
| mtrD-03        | 27C |       |       |      | NoAmplification   |
| NDM1           | 27C |       |       |      | NoAmplification   |
| nimE           | 27C |       |       |      | NoAmplification   |
| nisB           | 27C |       |       |      | NoAmplification   |
| oleC           | 27C | 35.59 | 83.45 | 1.84 |                   |
| oprD           | 27C | 33.47 | 83.29 | 1.96 | MultipleMeltPeaks |
| oprJ           | 27C | 34.33 | 85.85 | 1.95 |                   |
| pbp            | 27C |       |       |      | NoAmplification   |
| pbp2x          | 27C | 26.64 | 75.23 | 2.02 |                   |
| Pbp5           | 27C |       |       |      | NoAmplification   |
| penA           | 27C |       |       |      | NoAmplification   |
| pikR1          | 27C |       |       |      | NoAmplification   |
| pikR2          | 27C | 33.6  | 80.13 | 1.71 | MultipleMeltPeaks |
| pmrA           | 27C | 21.17 | 79.88 | 2.06 |                   |
| pncA           | 27C | 27.37 | 89.92 | 1.9  |                   |
| putative multi | 27C |       |       |      | CurveFitFailed    |
| qac            | 27C |       |       |      | NoAmplification   |
| qacA           | 27C | 29.59 | 81.21 | 2.02 |                   |
| qacA/qacB      | 27C |       |       |      | NoAmplification   |
| qacEdelta1-0   | 27C |       |       |      | NoAmplification   |
| qacEdelta1-0   | 27C | 36.61 | 81.08 | 1.84 | MultipleMeltPeaks |
| qacH-01        | 27C | 33.01 | 85.22 | 1.92 |                   |
| qacH-02        | 27C | 38.57 | 87.76 | 1.79 | MultipleMeltPeaks |
| qnrA           | 27C |       |       |      | NoAmplification   |

|              |     |       |       |      |                   |
|--------------|-----|-------|-------|------|-------------------|
| rarD-02      | 27C |       |       |      | NoAmplification   |
| sat4         | 27C |       |       |      | NoAmplification   |
| sdeB         | 27C |       |       |      | NoAmplification   |
| spcN-01      | 27C | 32.27 | 81.88 | 2.01 |                   |
| speA         | 27C |       |       |      | NoAmplification   |
| str          | 27C |       |       |      | NoAmplification   |
| strA         | 27C |       |       |      | NoAmplification   |
| strB         | 27C |       |       |      | NoAmplification   |
| sul1         | 27C | 38.11 | 89.9  | 1.6  |                   |
| sul2         | 27C |       |       |      | NoAmplification   |
| sulA/foIP-01 | 27C | 21.7  | 81.28 | 1.98 |                   |
| sulA/foIP-03 | 27C | 19.59 | 83.24 | 2.01 |                   |
| tet(32)      | 27C | 24.25 | 81.41 | 1.98 |                   |
| tet(34)      | 27C | 31.88 | 75.64 | 2    |                   |
| tet(35)      | 27C |       |       |      | NoAmplification   |
| tet(36)-A    | 27C |       |       |      | NoAmplification   |
| tet(36)-B    | 27C |       |       |      | NoAmplification   |
| tet(37)      | 27C | 29.54 | 76.15 | 1.97 | MultipleMeltPeaks |
| tetA-01      | 27C |       |       |      | NoAmplification   |
| tetA-02      | 27C | 38.83 | 79.55 | 1.76 | MultipleMeltPeaks |
| tetB-01      | 27C | 24.09 | 80.14 | 1.96 |                   |
| tetB-02      | 27C | 23.27 | 79.97 | 1.98 |                   |
| tetC-01      | 27C | 24.02 | 75.61 | 1.98 |                   |
| tetC-02      | 27C | 24.06 | 76.26 | 2    |                   |
| tetD-01      | 27C |       |       |      | NoAmplification   |
| tetD-02      | 27C | 37.47 | 76.3  | 1.86 |                   |
| tetE         | 27C |       |       |      | NoAmplification   |
| tetG-01      | 27C | 34.27 | 81.32 | 1.91 |                   |
| tetG-02      | 27C | 38.16 | 74.38 | 1.77 | MultipleMeltPeaks |
| tetH         | 27C |       |       |      | NoAmplification   |
| tetJ         | 27C |       |       |      | NoAmplification   |
| tetK         | 27C | 28.51 | 72.73 | 2.01 |                   |
| tetL-01      | 27C |       |       |      | NoAmplification   |
| tetL-02      | 27C |       |       |      | NoAmplification   |
| tetM-01      | 27C | 17.57 | 76.37 | 2    |                   |
| tetM-02      | 27C | 19.49 | 77.95 | 2    |                   |
| tetO-01      | 27C | 23.64 | 77.3  | 2    |                   |
| tetPA        | 27C |       |       |      | NoAmplification   |
| tetPB-01     | 27C |       |       |      | NoAmplification   |
| tetPB-02     | 27C | 37.97 | 85.24 | 1.74 |                   |
| tetPB-03     | 27C |       |       |      | NoAmplification   |
| tetPB-05     | 27C |       |       |      | NoAmplification   |
| tetQ         | 27C | 22.06 | 77.05 | 2.04 |                   |
| tetR-02      | 27C | 33.64 | 80.35 | 1.97 | MultipleMeltPeaks |
| tetR-03      | 27C | 22.8  | 76.36 | 2    |                   |
| tetS         | 27C | 40.6  | 61.41 | 1.55 | MultipleMeltPeaks |

|             |     |       |       |      |                             |
|-------------|-----|-------|-------|------|-----------------------------|
| tetT        | 27C |       |       |      | NoAmplification             |
| tetU-01     | 27C |       |       |      | NoAmplification             |
| tetV        | 27C |       |       |      | NoAmplification             |
| tetW-01     | 27C | 19.89 | 82.25 | 1.98 |                             |
| tetX        | 27C |       |       |      | NoAmplification             |
| tnpA-01     | 27C |       |       |      | NoAmplification             |
| tnpA-02     | 27C |       |       |      | NoAmplification             |
| tnpA-03     | 27C | 31.29 | 77.7  | 2.11 |                             |
| tnpA-04     | 27C |       |       |      | CurveFitFailed              |
| tnpA-05     | 27C | 27.91 | 81.04 | 1.92 |                             |
| tnpA-07     | 27C |       |       |      | NoAmplification             |
| tolC-01     | 27C |       |       |      | NoAmplification             |
| tolC-02     | 27C | 33.11 | 83.84 | 1.9  |                             |
| tolC-03     | 27C | 33.45 | 87.94 | 1.89 |                             |
| Tp614       | 27C |       |       |      | NoAmplification             |
| ttgA        | 27C |       |       |      | NoAmplification             |
| ttgB        | 27C |       |       |      | NoAmplification             |
| vanA        | 27C |       |       |      | NoAmplification             |
| vanB-01     | 27C | 38.79 | 80.35 | 1.79 |                             |
| vanC-01     | 27C |       |       |      | CurveFitFailed              |
| vanC-02     | 27C |       |       |      | NoAmplification             |
| vanC-03     | 27C | 33.65 | 86.26 | 1.83 | MultipleMeltPeaks           |
| vanC1       | 27C |       |       |      | NoAmplification             |
| vanC2/vanC3 | 27C |       |       |      | NoAmplification             |
| vanG        | 27C |       |       |      | NoAmplification             |
| vanHB       | 27C |       |       |      | NoAmplification             |
| vanHD       | 27C |       |       |      | NoAmplification             |
| vanRA-01    | 27C |       |       |      | NoAmplification             |
| vanRA-02    | 27C |       |       |      | NoAmplification             |
| vanRB       | 27C | 37.77 | 87.64 | 1.91 | MultipleMeltPeaks           |
| vanRC       | 27C |       |       |      | NoAmplification             |
| vanRC4      | 27C |       |       |      | NoAmplification             |
| vanRD       | 27C |       |       |      | NoAmplification             |
| vanSA       | 27C |       |       |      | NoAmplification             |
| vanSB       | 27C | 29.06 | 75.08 | 2.03 |                             |
| vanSC-01    | 27C |       |       |      | NoAmplification             |
| vanSC-02    | 27C |       |       |      | NoAmplification             |
| vanTC-01    | 27C |       |       |      | NoAmplification             |
| vanTC-02    | 27C | 33.47 | 86.72 | 1.83 | MultipleMeltPeaks           |
| vanTE       | 27C |       |       |      | NoAmplification             |
| vanTG       | 27C |       |       |      | NoAmplification             |
| vanWB       | 27C |       |       |      | NoAmplification             |
| vanWG       | 27C | 35.21 | 75.91 | 1.94 |                             |
| vanXA       | 27C |       |       |      | LowEfficiency, CurveFitFail |
| vanXB       | 27C |       |       |      | NoAmplification             |
| vanXD       | 27C | 30.8  | 76.71 | 2.03 |                             |

|              |     |       |       |      |                   |
|--------------|-----|-------|-------|------|-------------------|
| vanYB        | 27C |       |       |      | NoAmplification   |
| vanYD-01     | 27C |       |       |      | CurveFitFailed    |
| vanYD-02     | 27C |       |       |      | NoAmplification   |
| vatB-01      | 27C |       |       |      | NoAmplification   |
| vatB-02      | 27C |       |       |      | NoAmplification   |
| vatC-01      | 27C |       |       |      | NoAmplification   |
| vatC-02      | 27C |       |       |      | NoAmplification   |
| vatE-01      | 27C | 31.98 | 77.37 | 2.04 |                   |
| vatE-02      | 27C |       |       |      | NoAmplification   |
| vgaA-01      | 27C |       |       |      | NoAmplification   |
| vgaA-02      | 27C | 39.05 | 71.74 | 2.01 |                   |
| vgb-01       | 27C |       |       |      | NoAmplification   |
| vgbB-01      | 27C |       |       |      | NoAmplification   |
| vgbB-02      | 27C |       |       |      | NoAmplification   |
| yceE/mdtG-0  | 27C |       |       |      | NoAmplification   |
| yceE/mdtG-0  | 27C |       |       |      | NoAmplification   |
| yceL/mdtH-0  | 27C | 32.58 | 81.65 | 1.93 |                   |
| yceL/mdtH-0  | 27C |       |       |      | NoAmplification   |
| yceL/mdtH-0  | 27C | 38.55 | 63.2  | 1.77 | MultipleMeltPeaks |
| yidY/mdtL-01 | 27C | 37.26 | 85.06 | 1.77 | MultipleMeltPeaks |
| yidY/mdtL-02 | 27C | 38.8  | 77.25 | 1.71 |                   |































| Assay          | Sample | Ct | Tm    | Efficiency | flag                         |
|----------------|--------|----|-------|------------|------------------------------|
| 16S rRNA       | 28A    |    | 14.17 | 82.41      | 2.04                         |
| aac            | 28A    |    | 33.88 | 89.05      | 1.99                         |
| aac(6')-Ib(akz | 28A    |    |       |            | CurveFitFailed               |
| aac(6')-Ib(akz | 28A    |    | 34.41 | 85.95      | 1.88 MultipleMeltPeaks       |
| aac(6')-Ib(akz | 28A    |    | 37.54 | 76.48      | 1.78                         |
| aac(6')-II     | 28A    |    | 35.93 | 90.96      | 1.82 MultipleMeltPeaks       |
| aac(6')I1      | 28A    |    | 37.06 | 90.88      | 1.69 MultipleMeltPeaks       |
| aacA/aphD      | 28A    |    |       |            | BadR2, LowEfficiency, CtIsS  |
| aacC           | 28A    |    | 27.54 | 89.64      | 1.9 MultipleMeltPeaks        |
| aacC1          | 28A    |    |       |            | CurveFitFailed               |
| aacC2          | 28A    |    | 32.05 | 82.69      | 1.96                         |
| aacC4          | 28A    |    | 30.57 | 92.19      | 2                            |
| aadA-01        | 28A    |    |       |            | LowEfficiency, CtIsSmall, S: |
| aadA-02        | 28A    |    |       |            | LowEfficiency, CtIsSmall, S: |
| aadA-1-01      | 28A    |    |       |            | NoAmplification              |
| aadA-1-02      | 28A    |    |       |            | NoAmplification              |
| aadA1          | 28A    |    | 37.35 | 83.93      | 1.81                         |
| aadA2-01       | 28A    |    |       |            | NoAmplification              |
| aadA2-02       | 28A    |    | 34.44 | 75.4       | 1.98                         |
| aadA2-03       | 28A    |    |       |            | NoAmplification              |
| aadA5-01       | 28A    |    | 37.8  | 78.47      | 1.79 MultipleMeltPeaks       |
| aadA5-02       | 28A    |    | 31.44 | 88.47      | 1.93                         |
| aadA9-01       | 28A    |    | 34.5  | 88.69      | 1.78                         |
| aadA9-02       | 28A    |    |       |            | CurveFitFailed               |
| aadD           | 28A    |    |       |            | CurveFitFailed               |
| aadE           | 28A    |    |       |            | CurveFitFailed               |
| acrA-01        | 28A    |    | 25.88 | 83.47      | 1.93                         |
| acrA-02        | 28A    |    | 34.02 | 86.51      | 1.89                         |
| acrA-03        | 28A    |    | 39.5  | 65.21      | 1.65 MultipleMeltPeaks       |
| acrA-04        | 28A    |    | 29.42 | 83.53      | 1.95                         |
| acrA-05        | 28A    |    | 28.3  | 87.51      | 1.88 MultipleMeltPeaks       |
| acrB-01        | 28A    |    | 33.82 | 90.67      | 1.91                         |
| acrF           | 28A    |    | 31.69 | 87.15      | 1.93                         |
| acrR-01        | 28A    |    | 32.67 | 91.13      | 1.82                         |
| acrR-02        | 28A    |    | 30.91 | 87.29      | 1.93                         |
| Actin          | 28A    |    | 22.43 | 87.25      | 1.94                         |
| adeA           | 28A    |    | 36.78 | 61.95      | 2 MultipleMeltPeaks          |
| ampC-01        | 28A    |    | 34.16 | 87.66      | 1.92                         |
| ampC-02        | 28A    |    | 35.42 | 89.28      | 1.86                         |
| ampC-04        | 28A    |    | 30.95 | 79.19      | 1.77                         |
| ampC-05        | 28A    |    | 35.84 | 90.06      | 1.64                         |
| ampC-06        | 28A    |    |       |            | CurveFitFailed               |
| ampC-07        | 28A    |    | 35.65 | 88.3       | 1.78 MultipleMeltPeaks       |
| ampC-09        | 28A    |    |       |            | CurveFitFailed               |
| ampC/blaDH     | 28A    |    | 32.71 | 84.19      | 1.93                         |

|                          |     |       |       |      |                                          |
|--------------------------|-----|-------|-------|------|------------------------------------------|
| aph                      | 28A |       |       |      | CurveFitFailed                           |
| aph(2')-Id-01            | 28A |       |       |      | LowEfficiency, CtIsSmall, S <sub>e</sub> |
| aph(2')-Id-02            | 28A |       |       |      | LowEfficiency, CtIsSmall, S <sub>e</sub> |
| aph6ia                   | 28A |       |       |      | LowEfficiency, CtIsSmall, S <sub>e</sub> |
| aphA1(aka k <sub>e</sub> | 28A |       |       |      | LowEfficiency, CtIsSmall, S <sub>e</sub> |
| bacA-01                  | 28A | 39.17 | 88    | 1.6  |                                          |
| bacA-02                  | 28A | 37.6  | 84.43 | 1.63 | MultipleMeltPeaks                        |
| BETA-globin              | 28A | 23.71 | 84.44 | 1.95 |                                          |
| bla-ACC-1                | 28A | 38.3  | 86.22 | 1.74 | MultipleMeltPeaks                        |
| bla-L1                   | 28A | 31.21 | 86.17 | 1.97 |                                          |
| bla1                     | 28A |       |       |      | CurveFitFailed                           |
| blaCMY                   | 28A | 30.37 | 81.34 | 1.92 |                                          |
| blaCMY2-01               | 28A |       |       |      | NoAmplification                          |
| blaCMY2-02               | 28A | 28.87 | 85.22 | 1.94 | MultipleMeltPeaks                        |
| blaCTX-M-01              | 28A |       |       |      | CurveFitFailed                           |
| blaCTX-M-02              | 28A | 34.57 | 84.81 | 1.8  | MultipleMeltPeaks                        |
| blaCTX-M-03              | 28A |       |       |      | NoAmplification                          |
| blaCTX-M-04              | 28A | 31.78 | 91.47 | 1.87 |                                          |
| blaCTX-M-05              | 28A | 32.07 | 77.13 | 1.79 |                                          |
| blaCTX-M-06              | 28A |       |       |      | NoAmplification                          |
| blaGES                   | 28A |       |       |      | NoAmplification                          |
| blaIMP-01                | 28A |       |       |      | NoAmplification                          |
| blaIMP-02                | 28A |       |       |      | LowEfficiency, CtIsSmall, S <sub>e</sub> |
| blaMOX/blaC              | 28A | 39.55 | 62.69 | 1.72 | MultipleMeltPeaks                        |
| blaOCH                   | 28A |       |       |      | NoAmplification                          |
| blaOKP                   | 28A |       |       |      | NoAmplification                          |
| blaOXA1/blaC             | 28A |       |       |      | CurveFitFailed                           |
| blaOXA10-01              | 28A |       |       |      | LowEfficiency, CtIsSmall, S <sub>e</sub> |
| blaOXA10-02              | 28A |       |       |      | CurveFitFailed                           |
| blaOXY                   | 28A | 33.74 | 90.61 | 1.75 |                                          |
| blaPAO                   | 28A |       |       |      | NoAmplification                          |
| blaPER                   | 28A |       |       |      | CurveFitFailed                           |
| blaPSE                   | 28A |       |       |      | NoAmplification                          |
| blaROB                   | 28A |       |       |      | NoAmplification                          |
| blaSFO                   | 28A | 28.93 | 87.81 | 1.91 |                                          |
| blaSHV-01                | 28A | 40.64 | 89.6  | 1.52 | MultipleMeltPeaks                        |
| blaSHV-02                | 28A | 35.37 | 73.89 | 2.05 |                                          |
| blaTEM                   | 28A | 22.91 | 79.66 | 2.08 |                                          |
| blaTLA                   | 28A |       |       |      | CurveFitFailed                           |
| blaVEB                   | 28A |       |       |      | NoAmplification                          |
| blaVIM                   | 28A | 37.67 | 78.6  | 1.83 | MultipleMeltPeaks                        |
| blaZ                     | 28A |       |       |      | LowEfficiency, CtIsSmall, S <sub>e</sub> |
| carB                     | 28A |       |       |      | NoAmplification                          |
| catA1                    | 28A |       |       |      | NoAmplification                          |
| catB3                    | 28A |       |       |      | CurveFitFailed                           |
| catB8                    | 28A | 30.89 | 81.79 | 1.96 |                                          |

|            |     |       |       |      |                              |
|------------|-----|-------|-------|------|------------------------------|
| ceoA       | 28A | 28.37 | 91.14 | 2.01 | MultipleMeltPeaks            |
| cepA       | 28A |       |       |      | NoAmplification              |
| cfiA       | 28A |       |       |      | NoAmplification              |
| cfr        | 28A |       |       |      | LowEfficiency, CtIsSmall, S: |
| cfxA       | 28A | 21.05 | 78.15 | 2.07 |                              |
| cmeA       | 28A |       |       |      | CurveFitFailed               |
| cmlA1-01   | 28A | 32.29 | 90.19 | 1.94 |                              |
| cmlA1-02   | 28A | 33.15 | 89.58 | 1.98 |                              |
| cmr        | 28A |       |       |      | LowEfficiency, CtIsSmall, S: |
| cmx(A)     | 28A | 29.63 | 84.77 | 2    | MultipleMeltPeaks            |
| cphA-01    | 28A |       |       |      | NoAmplification              |
| cphA-02    | 28A | 34.3  | 81.68 | 1.86 |                              |
| dfrA1      | 28A |       |       |      | NoAmplification              |
| dfrA12     | 28A |       |       |      | NoAmplification              |
| emrD       | 28A | 29.99 | 91.06 | 1.87 |                              |
| ereA       | 28A |       |       |      | NoAmplification              |
| ereB       | 28A | 34.88 | 86    | 1.85 |                              |
| erm(34)    | 28A | 36.03 | 89.46 | 1.84 |                              |
| erm(35)    | 28A |       |       |      | CurveFitFailed               |
| erm(36)    | 28A | 31.44 | 86.02 | 2.17 |                              |
| ermA       | 28A |       |       |      | LowEfficiency, CtIsSmall, S: |
| ermA/ermTR | 28A | 34.59 | 77.25 | 1.95 |                              |
| ermB       | 28A | 21.59 | 75.26 | 2.14 |                              |
| ermC       | 28A |       |       |      | LowEfficiency, CtIsSmall, S: |
| ermF       | 28A | 23.88 | 75.11 | 2    |                              |
| ermJ/ermD  | 28A |       |       |      | NoAmplification              |
| ermK-01    | 28A |       |       |      | CurveFitFailed               |
| ermK-02    | 28A |       |       |      | NoAmplification              |
| ermT-01    | 28A |       |       |      | NoAmplification              |
| ermT-02    | 28A |       |       |      | NoAmplification              |
| ermX       | 28A | 37.7  | 86.31 | 1.63 |                              |
| ermY       | 28A |       |       |      | NoAmplification              |
| fabK       | 28A | 27.63 | 79.6  | 2.08 |                              |
| floR       | 28A | 40.41 | 65.08 | 1.54 | MultipleMeltPeaks            |
| folA       | 28A | 35.37 | 85.54 | 1.87 |                              |
| fosB       | 28A |       |       |      | LowEfficiency, CtIsSmall, S: |
| fosX       | 28A |       |       |      | CurveFitFailed               |
| fox5       | 28A | 28.02 | 87.26 | 1.89 |                              |
| imiR       | 28A |       |       |      | CurveFitFailed               |
| lmrA-01    | 28A | 37.08 | 83.78 | 1.91 |                              |
| intl       | 28A | 31.22 | 84.76 | 1.88 |                              |
| intl1      | 28A | 20.36 | 88.38 | 2.01 |                              |
| IS613      | 28A | 24.97 | 80.12 | 2.09 |                              |
| lnuA-01    | 28A |       |       |      | CurveFitFailed               |
| lnuB-01    | 28A |       |       |      | LowEfficiency, CtIsSmall, S: |
| lnuB-02    | 28A |       |       |      | LowEfficiency, CtIsSmall, S: |

|                |     |       |       |      |                                          |
|----------------|-----|-------|-------|------|------------------------------------------|
| lnuC           | 28A |       |       |      | CurveFitFailed                           |
| marR-01        | 28A | 29.47 | 89.97 | 1.91 |                                          |
| matA/mel       | 28A | 17.64 | 77.97 | 2.08 |                                          |
| mdet1          | 28A |       |       |      | NoAmplification                          |
| mdtA           | 28A | 34.33 | 83.89 | 1.97 | MultipleMeltPeaks                        |
| mdtE/yhiU      | 28A | 36.37 | 90.71 | 1.76 |                                          |
| mecA           | 28A |       |       |      | NoAmplification                          |
| mefA           | 28A | 16.89 | 80.7  | 2.01 | MultipleMeltPeaks                        |
| mepA           | 28A | 35.72 | 91.44 | 1.76 |                                          |
| mexA           | 28A |       |       |      | CurveFitFailed                           |
| mexD           | 28A | 34.57 | 86.77 | 1.88 |                                          |
| mexE           | 28A | 33.89 | 89.1  | 1.9  |                                          |
| mexF           | 28A | 25.95 | 91.32 | 2.06 |                                          |
| mphA-01        | 28A | 27.43 | 89.58 | 1.95 |                                          |
| mphA-02        | 28A | 30.26 | 87.87 | 1.7  |                                          |
| mphB           | 28A | 33.04 | 88.48 | 1.95 | MultipleMeltPeaks                        |
| mphC           | 28A |       |       |      | NoAmplification                          |
| msrA-01        | 28A |       |       |      | NoAmplification                          |
| msrC-01        | 28A |       |       |      | NoAmplification                          |
| mtrC-01        | 28A | 34.27 | 83.02 | 1.98 |                                          |
| mtrC-02        | 28A | 37.28 | 84.64 | 1.76 | MultipleMeltPeaks                        |
| mtrD-02        | 28A | 26.9  | 81.57 | 2.02 | MultipleMeltPeaks                        |
| mtrD-03        | 28A | 28.62 | 83.53 | 1.92 |                                          |
| NDM1           | 28A |       |       |      | CurveFitFailed                           |
| nimE           | 28A | 37    | 75.42 | 1.95 |                                          |
| nisB           | 28A |       |       |      | NoAmplification                          |
| oleC           | 28A | 31.61 | 91.12 | 1.9  |                                          |
| oprD           | 28A | 27.72 | 88.62 | 1.99 | MultipleMeltPeaks                        |
| oprJ           | 28A | 28.96 | 91.37 | 1.98 | MultipleMeltPeaks                        |
| pbp            | 28A |       |       |      | LowEfficiency, CtIsSmall, S <sub>c</sub> |
| pbp2x          | 28A | 25.46 | 76.06 | 2.06 |                                          |
| Pbp5           | 28A |       |       |      | LowEfficiency, CtIsSmall, S <sub>c</sub> |
| penA           | 28A | 33.63 | 89.21 | 1.81 |                                          |
| pikR1          | 28A | 36.53 | 89.84 | 1.81 | MultipleMeltPeaks                        |
| pikR2          | 28A | 30.95 | 84.9  | 2.08 | MultipleMeltPeaks                        |
| pmrA           | 28A | 23.02 | 79.67 | 2.08 |                                          |
| pncA           | 28A | 26.24 | 90.44 | 1.89 |                                          |
| putative multi | 28A | 37.05 | 77.61 | 1.78 | MultipleMeltPeaks                        |
| qac            | 28A | 35.72 | 79.21 | 1.9  |                                          |
| qacA           | 28A |       |       |      | NoAmplification                          |
| qacA/qacB      | 28A | 40.5  | 85    | 1.5  | MultipleMeltPeaks                        |
| qacEdelta1-0   | 28A |       |       |      | NoAmplification                          |
| qacEdelta1-0   | 28A | 36.68 | 90.07 | 1.77 | MultipleMeltPeaks                        |
| qacH-01        | 28A | 32.86 | 88.83 | 1.88 |                                          |
| qacH-02        | 28A | 38.9  | 84.01 | 1.54 | MultipleMeltPeaks                        |
| qnrA           | 28A | 38.16 | 84.72 | 1.9  | MultipleMeltPeaks                        |



|              |     |       |       |      |                             |
|--------------|-----|-------|-------|------|-----------------------------|
| rarD-02      | 28A |       |       |      | NoAmplification             |
| sat4         | 28A |       |       |      | NoAmplification             |
| sdeB         | 28A |       |       |      | LowEfficiency, CtIsSmall, S |
| spcN-01      | 28A | 39.13 | 81.51 | 1.79 |                             |
| speA         | 28A |       |       |      | NoAmplification             |
| str          | 28A |       |       |      | NoAmplification             |
| strA         | 28A |       |       |      | LowEfficiency, CtIsSmall, C |
| strB         | 28A |       |       |      | CurveFitFailed              |
| sul1         | 28A |       |       |      | NoAmplification             |
| sul2         | 28A | 27.72 | 86.37 | 1.96 |                             |
| sulA/foIP-01 | 28A | 21.73 | 81.57 | 1.99 |                             |
| sulA/foIP-03 | 28A | 20.28 | 83.47 | 2.01 |                             |
| tet(32)      | 28A | 26.24 | 81.51 | 1.98 |                             |
| tet(34)      | 28A | 33.57 | 75.42 | 1.99 |                             |
| tet(35)      | 28A |       |       |      | NoAmplification             |
| tet(36)-A    | 28A | 32.63 | 82.06 | 2.04 |                             |
| tet(36)-B    | 28A |       |       |      | LowEfficiency, CtIsSmall, S |
| tet(37)      | 28A | 34.29 | 88.8  | 1.96 | MultipleMeltPeaks           |
| tetA-01      | 28A | 30.68 | 85.31 | 1.95 |                             |
| tetA-02      | 28A | 36.43 | 83.57 | 1.75 | MultipleMeltPeaks           |
| tetB-01      | 28A | 28.96 | 79.99 | 1.95 |                             |
| tetB-02      | 28A | 26.99 | 79.95 | 1.98 |                             |
| tetC-01      | 28A | 28.48 | 75.56 | 1.98 |                             |
| tetC-02      | 28A |       |       |      | CurveFitFailed              |
| tetD-01      | 28A |       |       |      | CurveFitFailed              |
| tetD-02      | 28A | 37.14 | 62.6  | 2    | MultipleMeltPeaks           |
| tetE         | 28A |       |       |      | NoAmplification             |
| tetG-01      | 28A | 32.91 | 90.32 | 1.99 |                             |
| tetG-02      | 28A | 30.44 | 87.41 | 1.99 |                             |
| tetH         | 28A |       |       |      | LowEfficiency, CtIsSmall, C |
| tetJ         | 28A |       |       |      | NoAmplification             |
| tetK         | 28A |       |       |      | CurveFitFailed              |
| tetL-01      | 28A |       |       |      | CurveFitFailed              |
| tetL-02      | 28A | 34.29 | 86.66 | 1.87 | MultipleMeltPeaks           |
| tetM-01      | 28A | 18.28 | 76.31 | 2.01 |                             |
| tetM-02      | 28A | 20.22 | 77.94 | 1.98 |                             |
| tetO-01      | 28A | 27.88 | 77.16 | 1.98 |                             |
| tetPA        | 28A |       |       |      | NoAmplification             |
| tetPB-01     | 28A |       |       |      | NoAmplification             |
| tetPB-02     | 28A | 33.13 | 85.28 | 1.89 |                             |
| tetPB-03     | 28A |       |       |      | NoAmplification             |
| tetPB-05     | 28A |       |       |      | NoAmplification             |
| tetQ         | 28A | 19.75 | 76.97 | 2.09 |                             |
| tetR-02      | 28A | 31.76 | 89.17 | 1.87 |                             |
| tetR-03      | 28A | 26.15 | 76.25 | 1.98 |                             |
| tetS         | 28A | 32.01 | 86.36 | 1.64 |                             |

|             |     |       |       |      |                                          |
|-------------|-----|-------|-------|------|------------------------------------------|
| tetT        | 28A |       |       |      | CurveFitFailed                           |
| tetU-01     | 28A |       |       |      | NoAmplification                          |
| tetV        | 28A | 37.75 | 91.51 | 1.62 | MultipleMeltPeaks                        |
| tetW-01     | 28A | 19.07 | 82.68 | 1.97 |                                          |
| tetX        | 28A |       |       |      | BadR2, CtIsSmall, Saturatio              |
| tnpA-01     | 28A |       |       |      | LowEfficiency, CtIsSmall, S <sub>e</sub> |
| tnpA-02     | 28A | 26.33 | 85.31 | 1.79 |                                          |
| tnpA-03     | 28A | 34.56 | 77.97 | 1.97 |                                          |
| tnpA-04     | 28A | 30.44 | 83.12 | 1.94 |                                          |
| tnpA-05     | 28A | 37.28 | 75.04 | 1.77 | MultipleMeltPeaks                        |
| tnpA-07     | 28A |       |       |      | NoAmplification                          |
| tolC-01     | 28A |       |       |      | LowEfficiency, CtIsSmall, S <sub>e</sub> |
| tolC-02     | 28A | 30.33 | 87.78 | 2.02 | MultipleMeltPeaks                        |
| tolC-03     | 28A | 30.56 | 84.07 | 1.95 |                                          |
| Tp614       | 28A | 32.53 | 83.77 | 1.93 |                                          |
| ttgA        | 28A | 37.04 | 89.23 | 1.77 |                                          |
| ttgB        | 28A | 36.26 | 88.37 | 1.85 | MultipleMeltPeaks                        |
| vanA        | 28A |       |       |      | NoAmplification                          |
| vanB-01     | 28A | 33.56 | 83.68 | 1.91 | MultipleMeltPeaks                        |
| vanC-01     | 28A |       |       |      | CurveFitFailed                           |
| vanC-02     | 28A |       |       |      | CurveFitFailed                           |
| vanC-03     | 28A | 30.52 | 86.62 | 1.88 | MultipleMeltPeaks                        |
| vanC1       | 28A |       |       |      | NoAmplification                          |
| vanC2/vanC3 | 28A | 33.03 | 79.28 | 2.07 |                                          |
| vanG        | 28A |       |       |      | NoAmplification                          |
| vanHB       | 28A | 31.95 | 89.97 | 1.97 | MultipleMeltPeaks                        |
| vanHD       | 28A | 39.34 | 90.25 | 1.63 | MultipleMeltPeaks                        |
| vanRA-01    | 28A |       |       |      | CurveFitFailed                           |
| vanRA-02    | 28A | 38.17 | 74.57 | 1.78 | MultipleMeltPeaks                        |
| vanRB       | 28A | 34.35 | 87.95 | 1.89 |                                          |
| vanRC       | 28A |       |       |      | LowEfficiency, CtIsSmall, S <sub>e</sub> |
| vanRC4      | 28A |       |       |      | LowEfficiency, CtIsSmall, S <sub>e</sub> |
| vanRD       | 28A |       |       |      | LowEfficiency, CtIsSmall, S <sub>e</sub> |
| vanSA       | 28A |       |       |      | BadR2, LowEfficiency, CtIsS              |
| vanSB       | 28A | 33.52 | 74.43 | 1.93 |                                          |
| vanSC-01    | 28A | 33.12 | 84.5  | 2    |                                          |
| vanSC-02    | 28A |       |       |      | NoAmplification                          |
| vanTC-01    | 28A |       |       |      | NoAmplification                          |
| vanTC-02    | 28A | 36.82 | 86.88 | 1.68 |                                          |
| vanTE       | 28A | 35.15 | 88.96 | 1.83 |                                          |
| vanTG       | 28A |       |       |      | NoAmplification                          |
| vanWB       | 28A |       |       |      | BadR2, CtIsSmall, Saturatio              |
| vanWG       | 28A | 34.72 | 75.49 | 1.96 |                                          |
| vanXA       | 28A |       |       |      | CurveFitFailed                           |
| vanXB       | 28A |       |       |      | NoAmplification                          |
| vanXD       | 28A | 31.16 | 75.98 | 2.02 |                                          |

|              |     |       |       |      |                              |
|--------------|-----|-------|-------|------|------------------------------|
| vanYB        | 28A |       |       |      | CurveFitFailed               |
| vanYD-01     | 28A | 37.43 | 90.22 | 1.67 |                              |
| vanYD-02     | 28A |       |       |      | NoAmplification              |
| vatB-01      | 28A |       |       |      | LowEfficiency, CtIsSmall, Ct |
| vatB-02      | 28A | 33.75 | 86.57 | 1.94 |                              |
| vatC-01      | 28A | 37.27 | 74.74 | 1.82 |                              |
| vatC-02      | 28A | 31.78 | 92.09 | 1.9  |                              |
| vatE-01      | 28A | 29.73 | 76.51 | 2.11 |                              |
| vatE-02      | 28A | 37.03 | 75.66 | 2.14 |                              |
| vgaA-01      | 28A |       |       |      | LowEfficiency, CtIsSmall, S: |
| vgaA-02      | 28A |       |       |      | CurveFitFailed               |
| vgb-01       | 28A | 38.89 | 79.24 | 1.79 |                              |
| vgbB-01      | 28A | 35.94 | 61.49 | 1.77 | SaturationBaselineRatiolsL   |
| vgbB-02      | 28A |       |       |      | NoAmplification              |
| yceE/mdtG-0  | 28A |       |       |      | CurveFitFailed               |
| yceE/mdtG-0  | 28A |       |       |      | NoAmplification              |
| yceL/mdtH-0  | 28A | 32.69 | 86.36 | 1.88 |                              |
| yceL/mdtH-0  | 28A |       |       |      | NoAmplification              |
| yceL/mdtH-0  | 28A | 36.39 | 89.72 | 1.75 |                              |
| yidY/mdtL-01 | 28A | 29.72 | 80.71 | 1.93 |                              |
| yidY/mdtL-02 | 28A |       |       |      | CurveFitFailed               |































| Assay          | Sample | Ct | Tm    | Efficiency | flag                   |
|----------------|--------|----|-------|------------|------------------------|
| 16S rRNA       | 28B    |    | 15.96 | 81.34      | 2.04                   |
| aac            | 28B    |    | 29.32 | 86.71      | 1.67 MultipleMeltPeaks |
| aac(6')-Ib(akz | 28B    |    | 38.18 | 80.75      | 1.79                   |
| aac(6')-Ib(akz | 28B    |    | 29.5  | 86.32      | 2.03 MultipleMeltPeaks |
| aac(6')-Ib(akz | 28B    |    | 35.52 | 81.75      | 1.88 MultipleMeltPeaks |
| aac(6')-II     | 28B    |    | 37.79 | 81.37      | 1.55 MultipleMeltPeaks |
| aac(6')I1      | 28B    |    | 38.44 | 89.52      | 1.7 MultipleMeltPeaks  |
| aacA/aphD      | 28B    |    |       |            | NoAmplification        |
| aacC           | 28B    |    | 30.05 | 92.2       | 1.95                   |
| aacC1          | 28B    |    | 37.47 | 84.1       | 1.8                    |
| aacC2          | 28B    |    |       |            | NoAmplification        |
| aacC4          | 28B    |    | 30.4  | 87.39      | 2.01 MultipleMeltPeaks |
| aadA-01        | 28B    |    |       |            | NoAmplification        |
| aadA-02        | 28B    |    | 30.3  | 86.71      | 1.98                   |
| aadA-1-01      | 28B    |    | 34.89 | 81.73      | 1.91                   |
| aadA-1-02      | 28B    |    |       |            | NoAmplification        |
| aadA1          | 28B    |    | 29.97 | 84.29      | 2.06                   |
| aadA2-01       | 28B    |    | 35.14 | 88.62      | 1.77                   |
| aadA2-02       | 28B    |    | 31.04 | 75.82      | 2.09                   |
| aadA2-03       | 28B    |    |       |            | NoAmplification        |
| aadA5-01       | 28B    |    | 33.05 | 89.08      | 1.93                   |
| aadA5-02       | 28B    |    | 30.2  | 86.8       | 1.93                   |
| aadA9-01       | 28B    |    | 33    | 92.88      | 1.91                   |
| aadA9-02       | 28B    |    | 35.98 | 84.67      | 1.87                   |
| aadD           | 28B    |    |       |            | NoAmplification        |
| aadE           | 28B    |    |       |            | NoAmplification        |
| acrA-01        | 28B    |    | 31.11 | 89.07      | 1.89                   |
| acrA-02        | 28B    |    | 34.12 | 86.6       | 1.81                   |
| acrA-03        | 28B    |    | 38.93 | 81.69      | 1.78 MultipleMeltPeaks |
| acrA-04        | 28B    |    | 28.53 | 81.02      | 1.98                   |
| acrA-05        | 28B    |    | 30.58 | 88.64      | 1.97                   |
| acrB-01        | 28B    |    | 37.34 | 76.1       | 1.92                   |
| acrF           | 28B    |    | 29.65 | 84.63      | 1.82                   |
| acrR-01        | 28B    |    | 30.61 | 85.04      | 1.95 MultipleMeltPeaks |
| acrR-02        | 28B    |    | 34.4  | 86.21      | 1.93 MultipleMeltPeaks |
| Actin          | 28B    |    | 20.2  | 86.93      | 1.97                   |
| adeA           | 28B    |    | 36.57 | 74.4       | 1.78                   |
| ampC-01        | 28B    |    | 32.22 | 84.74      | 2.02 MultipleMeltPeaks |
| ampC-02        | 28B    |    | 38.89 | 86.89      | 1.77 MultipleMeltPeaks |
| ampC-04        | 28B    |    | 29.5  | 79.22      | 1.84 MultipleMeltPeaks |
| ampC-05        | 28B    |    |       |            | NoAmplification        |
| ampC-06        | 28B    |    |       |            | NoAmplification        |
| ampC-07        | 28B    |    | 30.18 | 88.47      | 1.91                   |
| ampC-09        | 28B    |    |       |            | NoAmplification        |
| ampC/blaDH     | 28B    |    | 29.11 | 87.57      | 1.96 MultipleMeltPeaks |

|                            |     |       |       |      |                   |
|----------------------------|-----|-------|-------|------|-------------------|
| aph                        | 28B |       |       |      | NoAmplification   |
| aph(2')-Id-01              | 28B |       |       |      | NoAmplification   |
| aph(2')-Id-02              | 28B |       |       |      | NoAmplification   |
| aph6ia                     | 28B | 40.42 | 78.63 | 1.72 | MultipleMeltPeaks |
| aphA1(aka k <sub>z</sub> ) | 28B |       |       |      | NoAmplification   |
| bacA-01                    | 28B | 35.08 | 85.93 | 1.91 | MultipleMeltPeaks |
| bacA-02                    | 28B | 33.64 | 87.95 | 1.88 | MultipleMeltPeaks |
| BETA-globin                | 28B | 22.2  | 84.09 | 1.99 | MultipleMeltPeaks |
| bla-ACC-1                  | 28B | 31.96 | 86.1  | 2.01 |                   |
| bla-L1                     | 28B | 28.96 | 85.93 | 1.94 |                   |
| bla1                       | 28B |       |       |      | NoAmplification   |
| blaCMY                     | 28B | 36.25 | 76.87 | 1.82 |                   |
| blaCMY2-01                 | 28B | 36.65 | 80.51 | 1.81 |                   |
| blaCMY2-02                 | 28B | 26.35 | 85.88 | 2    | MultipleMeltPeaks |
| blaCTX-M-01                | 28B |       |       |      | CurveFitFailed    |
| blaCTX-M-02                | 28B | 27.81 | 87.09 | 1.91 | MultipleMeltPeaks |
| blaCTX-M-03                | 28B | 35.6  | 80.97 | 1.87 | MultipleMeltPeaks |
| blaCTX-M-04                | 28B | 34.48 | 91.41 | 1.87 | MultipleMeltPeaks |
| blaCTX-M-05                | 28B | 33.45 | 76.04 | 1.76 |                   |
| blaCTX-M-06                | 28B | 36.57 | 83.93 | 1.82 |                   |
| blaGES                     | 28B |       |       |      | NoAmplification   |
| blaIMP-01                  | 28B |       |       |      | NoAmplification   |
| blaIMP-02                  | 28B | 37.44 | 83.24 | 1.78 |                   |
| blaMOX/blaC                | 28B | 37.57 | 88.26 | 1.77 |                   |
| blaOCH                     | 28B |       |       |      | NoAmplification   |
| blaOKP                     | 28B |       |       |      | NoAmplification   |
| blaOXA1/blaC               | 28B |       |       |      | NoAmplification   |
| blaOXA10-01                | 28B | 37.5  | 83.87 | 1.78 |                   |
| blaOXA10-02                | 28B |       |       |      | NoAmplification   |
| blaOXY                     | 28B | 32.75 | 88.89 | 1.82 |                   |
| blaPAO                     | 28B |       |       |      | NoAmplification   |
| blaPER                     | 28B | 33.92 | 81.31 | 1.98 |                   |
| blaPSE                     | 28B |       |       |      | NoAmplification   |
| blaROB                     | 28B |       |       |      | NoAmplification   |
| blaSFO                     | 28B | 28.29 | 89.51 | 1.96 |                   |
| blaSHV-01                  | 28B | 31.42 | 88.24 | 2.1  | MultipleMeltPeaks |
| blaSHV-02                  | 28B | 31.7  | 78.94 | 1.74 | MultipleMeltPeaks |
| blaTEM                     | 28B | 27.29 | 79.17 | 1.97 |                   |
| blaTLA                     | 28B |       |       |      | NoAmplification   |
| blaVEB                     | 28B |       |       |      | NoAmplification   |
| blaVIM                     | 28B | 37.9  | 79.42 | 1.85 | MultipleMeltPeaks |
| blaZ                       | 28B |       |       |      | NoAmplification   |
| carB                       | 28B | 35.32 | 84.56 | 1.86 | MultipleMeltPeaks |
| catA1                      | 28B |       |       |      | NoAmplification   |
| catB3                      | 28B | 33.55 | 87.65 | 2.03 |                   |
| catB8                      | 28B | 27.45 | 82.33 | 1.99 |                   |

|            |     |       |       |      |                              |
|------------|-----|-------|-------|------|------------------------------|
| ceoA       | 28B | 26.9  | 82.4  | 1.98 |                              |
| cepA       | 28B |       |       |      | NoAmplification              |
| cfiA       | 28B | 28.86 | 88.12 | 2.02 |                              |
| cfr        | 28B |       |       |      | NoAmplification              |
| cfxA       | 28B | 26.21 | 77.91 | 2.07 |                              |
| cmeA       | 28B | 37.68 | 82.61 | 1.71 | MultipleMeltPeaks            |
| cmlA1-01   | 28B |       |       |      | NoAmplification              |
| cmlA1-02   | 28B | 33.91 | 88.41 | 1.89 | MultipleMeltPeaks            |
| cmr        | 28B | 33.76 | 78.97 | 1.93 |                              |
| cmx(A)     | 28B | 24.92 | 84.58 | 1.95 | MultipleMeltPeaks            |
| cphA-01    | 28B | 28.61 | 86.27 | 1.97 | MultipleMeltPeaks            |
| cphA-02    | 28B | 32.96 | 82.68 | 1.98 |                              |
| dfrA1      | 28B | 31.99 | 78.56 | 2    |                              |
| dfrA12     | 28B | 34.51 | 86.02 | 1.82 |                              |
| emrD       | 28B | 31.29 | 84.36 | 1.91 | MultipleMeltPeaks            |
| ereA       | 28B | 33.2  | 82.74 | 1.96 |                              |
| ereB       | 28B | 32.56 | 85.43 | 2.12 |                              |
| erm(34)    | 28B |       |       |      | NoAmplification              |
| erm(35)    | 28B |       |       |      | NoAmplification              |
| erm(36)    | 28B | 30.59 | 90.67 | 2.1  |                              |
| ermA       | 28B |       |       |      | NoAmplification              |
| ermA/ermTR | 28B |       |       |      | NoAmplification              |
| ermB       | 28B |       |       |      | NoAmplification              |
| ermC       | 28B | 33.29 | 85.45 | 2.01 |                              |
| ermF       | 28B |       |       |      | NoAmplification              |
| ermJ/ermD  | 28B |       |       |      | NoAmplification              |
| ermK-01    | 28B | 34.17 | 74.79 | 1.99 | MultipleMeltPeaks            |
| ermK-02    | 28B | 34.51 | 86.06 | 1.81 |                              |
| ermT-01    | 28B |       |       |      | NoAmplification              |
| ermT-02    | 28B | 37.91 | 80.7  | 1.91 |                              |
| ermX       | 28B | 33.4  | 86.8  | 1.81 |                              |
| ermY       | 28B |       |       |      | NoAmplification              |
| fabK       | 28B | 26.02 | 79.58 | 2.05 |                              |
| floR       | 28B |       |       |      | NoAmplification              |
| folA       | 28B | 35.75 | 76.67 | 1.86 |                              |
| fosB       | 28B |       |       |      | LowEfficiency, CtIsSmall, S: |
| fosX       | 28B |       |       |      | NoAmplification              |
| fox5       | 28B | 25.14 | 87.82 | 1.95 |                              |
| imiR       | 28B |       |       |      | NoAmplification              |
| ImrA-01    | 28B | 33.38 | 82.9  | 1.96 |                              |
| intl       | 28B | 29.05 | 84.81 | 1.93 | MultipleMeltPeaks            |
| intl1      | 28B | 18.88 | 87.34 | 1.98 |                              |
| IS613      | 28B | 31.59 | 78.55 | 1.96 | MultipleMeltPeaks            |
| lnuA-01    | 28B |       |       |      | NoAmplification              |
| lnuB-01    | 28B |       |       |      | NoAmplification              |
| lnuB-02    | 28B | 33.19 | 87.09 | 1.94 |                              |

|                |     |       |       |      |                   |
|----------------|-----|-------|-------|------|-------------------|
| lnuC           | 28B | 33.56 | 87.43 | 1.9  | MultipleMeltPeaks |
| marR-01        | 28B | 37.1  | 85.52 | 1.78 | MultipleMeltPeaks |
| matA/mel       | 28B | 22.41 | 77.61 | 2.05 |                   |
| mdetI1         | 28B |       |       |      | NoAmplification   |
| mdtA           | 28B | 32.51 | 81.68 | 1.98 |                   |
| mdtE/yhiU      | 28B | 37.25 | 80.6  | 1.81 |                   |
| mecA           | 28B |       |       |      | NoAmplification   |
| mefA           | 28B | 22.01 | 80.42 | 1.98 | MultipleMeltPeaks |
| mepA           | 28B | 31.07 | 85.12 | 2    |                   |
| mexA           | 28B | 38.81 | 63.12 | 1.78 | MultipleMeltPeaks |
| mexD           | 28B | 29.77 | 80.32 | 2.02 | MultipleMeltPeaks |
| mexE           | 28B | 34.54 | 79.25 | 1.94 |                   |
| mexF           | 28B | 26.47 | 87.52 | 2.14 |                   |
| mphA-01        | 28B | 28.44 | 87.19 | 1.99 |                   |
| mphA-02        | 28B | 27.26 | 87.03 | 2.17 |                   |
| mphB           | 28B | 34.81 | 79.19 | 2.02 |                   |
| mphC           | 28B | 36.17 | 85.54 | 1.79 |                   |
| msrA-01        | 28B |       |       |      | NoAmplification   |
| msrC-01        | 28B |       |       |      | NoAmplification   |
| mtrC-01        | 28B | 33.82 | 82.48 | 1.93 |                   |
| mtrC-02        | 28B | 30.44 | 84.46 | 2.02 |                   |
| mtrD-02        | 28B | 25.99 | 85.21 | 1.87 | MultipleMeltPeaks |
| mtrD-03        | 28B | 32.78 | 85.32 | 1.97 |                   |
| NDM1           | 28B | 38.41 | 82.05 | 1.8  |                   |
| nimE           | 28B | 35.56 | 85.03 | 1.95 | MultipleMeltPeaks |
| nisB           | 28B |       |       |      | NoAmplification   |
| oleC           | 28B | 38.42 | 84.28 | 1.69 | MultipleMeltPeaks |
| oprD           | 28B | 27.32 | 86.22 | 2.03 |                   |
| oprJ           | 28B | 32.9  | 87.28 | 1.95 | MultipleMeltPeaks |
| pbp            | 28B |       |       |      | NoAmplification   |
| pbp2x          | 28B | 29.79 | 75.59 | 2.01 |                   |
| Pbp5           | 28B |       |       |      | NoAmplification   |
| penA           | 28B | 36.7  | 88.68 | 1.75 | MultipleMeltPeaks |
| pikR1          | 28B | 37.52 | 82.76 | 1.77 |                   |
| pikR2          | 28B | 28.29 | 85.12 | 2.06 | MultipleMeltPeaks |
| pmrA           | 28B | 28.01 | 79.64 | 2.08 |                   |
| pncA           | 28B | 33.83 | 90.17 | 1.84 |                   |
| putative multi | 28B | 28.73 | 84.78 | 1.96 |                   |
| qac            | 28B | 36.37 | 83.86 | 1.81 | MultipleMeltPeaks |
| qacA           | 28B | 33.33 | 70.98 | 1.94 | MultipleMeltPeaks |
| qacA/qacB      | 28B | 35.76 | 85.18 | 1.51 | MultipleMeltPeaks |
| qacEdelta1-0   | 28B |       |       |      | NoAmplification   |
| qacEdelta1-0   | 28B | 37.23 | 78.47 | 1.82 | MultipleMeltPeaks |
| qacH-01        | 28B | 30.25 | 86.42 | 1.97 | MultipleMeltPeaks |
| qacH-02        | 28B | 32.81 | 79.19 | 1.73 | MultipleMeltPeaks |
| qnrA           | 28B | 36.23 | 80.62 | 1.86 |                   |

|              |     |       |       |      |                   |
|--------------|-----|-------|-------|------|-------------------|
| rarD-02      | 28B | 38.03 | 85.92 | 1.7  |                   |
| sat4         | 28B |       |       |      | NoAmplification   |
| sdeB         | 28B |       |       |      | NoAmplification   |
| spcN-01      | 28B | 37.9  | 62.17 | 1.91 | MultipleMeltPeaks |
| speA         | 28B |       |       |      | NoAmplification   |
| str          | 28B |       |       |      | NoAmplification   |
| strA         | 28B | 40.48 | 62.44 | 1.68 | MultipleMeltPeaks |
| strB         | 28B | 32.4  | 85.22 | 1.99 |                   |
| sul1         | 28B | 33.12 | 90.29 | 1.86 |                   |
| sul2         | 28B |       |       |      | NoAmplification   |
| sulA/foIP-01 | 28B | 28.18 | 81.8  | 1.96 |                   |
| sulA/foIP-03 | 28B | 25.68 | 82.93 | 1.98 |                   |
| tet(32)      | 28B |       |       |      | NoAmplification   |
| tet(34)      | 28B |       |       |      | CurveFitFailed    |
| tet(35)      | 28B | 36.39 | 86.28 | 1.81 |                   |
| tet(36)-A    | 28B | 32.01 | 81.84 | 2.06 |                   |
| tet(36)-B    | 28B |       |       |      | NoAmplification   |
| tet(37)      | 28B | 34.29 | 87.32 | 1.95 |                   |
| tetA-01      | 28B | 29.38 | 85.08 | 1.95 |                   |
| tetA-02      | 28B | 32.8  | 81.16 | 1.95 |                   |
| tetB-01      | 28B | 30.09 | 89.65 | 1.98 |                   |
| tetB-02      | 28B | 34.1  | 73.85 | 1.91 | MultipleMeltPeaks |
| tetC-01      | 28B |       |       |      | NoAmplification   |
| tetC-02      | 28B |       |       |      | NoAmplification   |
| tetD-01      | 28B |       |       |      | NoAmplification   |
| tetD-02      | 28B | 39.36 | 75.86 | 1.78 |                   |
| tetE         | 28B | 37.65 | 83.53 | 2.12 | MultipleMeltPeaks |
| tetG-01      | 28B | 31.6  | 82.65 | 2.01 |                   |
| tetG-02      | 28B | 32.03 | 87.23 | 1.99 |                   |
| tetH         | 28B |       |       |      | NoAmplification   |
| tetJ         | 28B |       |       |      | NoAmplification   |
| tetK         | 28B |       |       |      | NoAmplification   |
| tetL-01      | 28B | 36.21 | 86.98 | 1.79 |                   |
| tetL-02      | 28B | 35.08 | 85.25 | 1.71 |                   |
| tetM-01      | 28B | 22.32 | 75.73 | 2.01 |                   |
| tetM-02      | 28B | 23.95 | 77.93 | 2.01 |                   |
| tetO-01      | 28B |       |       |      | NoAmplification   |
| tetPA        | 28B |       |       |      | NoAmplification   |
| tetPB-01     | 28B | 35.23 | 83.62 | 1.91 |                   |
| tetPB-02     | 28B | 28.26 | 85.35 | 2.02 |                   |
| tetPB-03     | 28B |       |       |      | NoAmplification   |
| tetPB-05     | 28B |       |       |      | CurveFitFailed    |
| tetQ         | 28B | 26.74 | 76.95 | 2.1  |                   |
| tetR-02      | 28B | 31.44 | 89.6  | 1.93 | MultipleMeltPeaks |
| tetR-03      | 28B |       |       |      | NoAmplification   |
| tetS         | 28B | 35.5  | 75.53 | 1.83 | MultipleMeltPeaks |

|             |     |       |       |      |                              |
|-------------|-----|-------|-------|------|------------------------------|
| tetT        | 28B |       |       |      | NoAmplification              |
| tetU-01     | 28B |       |       |      | NoAmplification              |
| tetV        | 28B |       |       |      | NoAmplification              |
| tetW-01     | 28B | 26.75 | 82.27 | 1.98 |                              |
| tetX        | 28B |       |       |      | BadR2, HighEfficiency, Ctls' |
| tnpA-01     | 28B | 33.95 | 81.97 | 2    |                              |
| tnpA-02     | 28B | 35.55 | 85.06 | 1.66 |                              |
| tnpA-03     | 28B | 28.85 | 78.45 | 2.12 |                              |
| tnpA-04     | 28B | 39.09 | 78.5  | 1.62 | MultipleMeltPeaks            |
| tnpA-05     | 28B | 40.35 | 83.03 | 1.66 | MultipleMeltPeaks            |
| tnpA-07     | 28B |       |       |      | NoAmplification              |
| tolC-01     | 28B | 37.41 | 80.89 | 1.73 | MultipleMeltPeaks            |
| tolC-02     | 28B | 29.07 | 88.01 | 2.01 | MultipleMeltPeaks            |
| tolC-03     | 28B | 29.56 | 85.43 | 2    |                              |
| Tp614       | 28B | 32.01 | 83.53 | 1.97 |                              |
| ttgA        | 28B |       |       |      | NoAmplification              |
| ttgB        | 28B | 34.11 | 79.07 | 1.98 | MultipleMeltPeaks            |
| vanA        | 28B |       |       |      | NoAmplification              |
| vanB-01     | 28B | 31.76 | 84.27 | 2.03 |                              |
| vanC-01     | 28B |       |       |      | NoAmplification              |
| vanC-02     | 28B |       |       |      | NoAmplification              |
| vanC-03     | 28B | 25.75 | 86.37 | 1.92 |                              |
| vanC1       | 28B |       |       |      | NoAmplification              |
| vanC2/vanC3 | 28B | 31.99 | 79.64 | 1.68 | MultipleMeltPeaks            |
| vanG        | 28B |       |       |      | NoAmplification              |
| vanHB       | 28B | 32.24 | 82.34 | 2    |                              |
| vanHD       | 28B | 31.73 | 82.67 | 1.93 |                              |
| vanRA-01    | 28B |       |       |      | NoAmplification              |
| vanRA-02    | 28B |       |       |      | NoAmplification              |
| vanRB       | 28B | 29.18 | 87.8  | 1.99 |                              |
| vanRC       | 28B |       |       |      | NoAmplification              |
| vanRC4      | 28B |       |       |      | NoAmplification              |
| vanRD       | 28B |       |       |      | BadR2, CtlsSmall, Saturatio  |
| vanSA       | 28B |       |       |      | NoAmplification              |
| vanSB       | 28B | 32.62 | 74.78 | 2.04 |                              |
| vanSC-01    | 28B | 32.37 | 84.44 | 2    |                              |
| vanSC-02    | 28B |       |       |      | NoAmplification              |
| vanTC-01    | 28B | 37.93 | 78.62 | 1.8  | MultipleMeltPeaks            |
| vanTC-02    | 28B | 35.38 | 85.16 | 1.81 |                              |
| vanTE       | 28B | 34.69 | 76.36 | 1.91 |                              |
| vanTG       | 28B |       |       |      | NoAmplification              |
| vanWB       | 28B |       |       |      | CurveFitFailed               |
| vanWG       | 28B |       |       |      | NoAmplification              |
| vanXA       | 28B |       |       |      | NoAmplification              |
| vanXB       | 28B |       |       |      | NoAmplification              |
| vanXD       | 28B | 34.94 | 75.09 | 1.94 |                              |

|              |     |       |       |      |                   |
|--------------|-----|-------|-------|------|-------------------|
| vanYB        | 28B |       |       |      | CurveFitFailed    |
| vanYD-01     | 28B | 31.54 | 89.98 | 1.87 | MultipleMeltPeaks |
| vanYD-02     | 28B |       |       |      | NoAmplification   |
| vatB-01      | 28B |       |       |      | NoAmplification   |
| vatB-02      | 28B | 35.14 | 80.78 | 1.95 | MultipleMeltPeaks |
| vatC-01      | 28B | 36.69 | 73.64 | 1.82 |                   |
| vatC-02      | 28B | 31.09 | 87.33 | 2    | MultipleMeltPeaks |
| vatE-01      | 28B | 30.56 | 76.83 | 2.13 |                   |
| vatE-02      | 28B |       |       |      | NoAmplification   |
| vgaA-01      | 28B |       |       |      | NoAmplification   |
| vgaA-02      | 28B | 41.14 | 80.56 | 1.66 | MultipleMeltPeaks |
| vgb-01       | 28B | 33.37 | 83.03 | 1.98 | MultipleMeltPeaks |
| vgbB-01      | 28B | 35.47 | 86.79 | 1.71 | MultipleMeltPeaks |
| vgbB-02      | 28B | 38.03 | 84.57 | 1.77 | MultipleMeltPeaks |
| yceE/mdtG-0  | 28B | 39.73 | 79.3  | 1.75 | MultipleMeltPeaks |
| yceE/mdtG-0  | 28B | 35.6  | 81.21 | 1.85 |                   |
| yceL/mdtH-0  | 28B | 30.51 | 84.32 | 1.99 |                   |
| yceL/mdtH-0  | 28B |       |       |      | NoAmplification   |
| yceL/mdtH-0  | 28B | 36.9  | 82    | 1.82 | MultipleMeltPeaks |
| yidY/mdtL-01 | 28B | 32.11 | 88.83 | 1.97 | MultipleMeltPeaks |
| yidY/mdtL-02 | 28B |       |       |      | NoAmplification   |































| Assay          | Sample | Ct | Tm    | Efficiency | flag                           |
|----------------|--------|----|-------|------------|--------------------------------|
| 16S rRNA       | 28C    |    | 22.63 | 82.22      | 2                              |
| aac            | 28C    |    | 34.68 | 77.83      | 1.56 MultipleMeltPeaks         |
| aac(6')-Ib(akz | 28C    |    |       |            | NoAmplification                |
| aac(6')-Ib(akz | 28C    |    | 36.1  | 82.77      | 1.84 MultipleMeltPeaks         |
| aac(6')-Ib(akz | 28C    |    |       |            | CurveFitFailed                 |
| aac(6')-II     | 28C    |    | 34.81 | 61.31      | 1.61 SaturationBaselineRatiosL |
| aac(6')I1      | 28C    |    |       |            | NoAmplification                |
| aacA/aphD      | 28C    |    |       |            | LowEfficiency, CtIsSmall, S:   |
| aacC           | 28C    |    |       |            | CurveFitFailed                 |
| aacC1          | 28C    |    |       |            | NoAmplification                |
| aacC2          | 28C    |    |       |            | NoAmplification                |
| aacC4          | 28C    |    |       |            | NoAmplification                |
| aadA-01        | 28C    |    |       |            | NoAmplification                |
| aadA-02        | 28C    |    | 38.03 | 80.61      | 1.78                           |
| aadA-1-01      | 28C    |    | 36.32 | 77.59      | 1.87                           |
| aadA-1-02      | 28C    |    |       |            | NoAmplification                |
| aadA1          | 28C    |    |       |            | CurveFitFailed                 |
| aadA2-01       | 28C    |    |       |            | NoAmplification                |
| aadA2-02       | 28C    |    |       |            | NoAmplification                |
| aadA2-03       | 28C    |    |       |            | NoAmplification                |
| aadA5-01       | 28C    |    |       |            | CurveFitFailed                 |
| aadA5-02       | 28C    |    |       |            | NoAmplification                |
| aadA9-01       | 28C    |    |       |            | CurveFitFailed                 |
| aadA9-02       | 28C    |    |       |            | CurveFitFailed                 |
| aadD           | 28C    |    |       |            | NoAmplification                |
| aadE           | 28C    |    |       |            | CurveFitFailed                 |
| acrA-01        | 28C    |    | 36.29 | 89.12      | 1.77                           |
| acrA-02        | 28C    |    |       |            | NoAmplification                |
| acrA-03        | 28C    |    |       |            | LowEfficiency, CtIsSmall, C:   |
| acrA-04        | 28C    |    |       |            | NoAmplification                |
| acrA-05        | 28C    |    | 32.22 | 83.66      | 1.95 MultipleMeltPeaks         |
| acrB-01        | 28C    |    | 35.64 | 76.64      | 2.01                           |
| acrF           | 28C    |    |       |            | CurveFitFailed                 |
| acrR-01        | 28C    |    |       |            | CurveFitFailed                 |
| acrR-02        | 28C    |    |       |            | CurveFitFailed                 |
| Actin          | 28C    |    | 22.18 | 87.27      | 1.94                           |
| adeA           | 28C    |    |       |            | NoAmplification                |
| ampC-01        | 28C    |    |       |            | CurveFitFailed                 |
| ampC-02        | 28C    |    | 37.13 | 86.72      | 2.11 MultipleMeltPeaks         |
| ampC-04        | 28C    |    | 34.42 | 77.84      | 1.99                           |
| ampC-05        | 28C    |    |       |            | NoAmplification                |
| ampC-06        | 28C    |    | 38.61 | 82.35      | 1.9                            |
| ampC-07        | 28C    |    |       |            | CurveFitFailed                 |
| ampC-09        | 28C    |    |       |            | CurveFitFailed                 |
| ampC/blaDH     | 28C    |    | 32.94 | 80.55      | 1.97                           |

|                          |     |       |       |      |                                          |
|--------------------------|-----|-------|-------|------|------------------------------------------|
| aph                      | 28C |       |       |      | LowEfficiency, CtIsSmall, Ci             |
| aph(2')-Id-01            | 28C |       |       |      | LowEfficiency, CtIsSmall, Ci             |
| aph(2')-Id-02            | 28C |       |       |      | LowEfficiency, CtIsSmall, Ci             |
| aph6ia                   | 28C |       |       |      | NoAmplification                          |
| aphA1(aka k <sub>z</sub> | 28C |       |       |      | NoAmplification                          |
| bacA-01                  | 28C |       |       |      | LowEfficiency, CtIsSmall, S <sub>e</sub> |
| bacA-02                  | 28C |       |       |      | LowEfficiency, CtIsSmall, Ci             |
| BETA-globin              | 28C | 25.16 | 84.13 | 1.95 | MultipleMeltPeaks                        |
| bla-ACC-1                | 28C |       |       |      | CurveFitFailed                           |
| bla-L1                   | 28C | 31.08 | 85.5  | 1.96 |                                          |
| bla1                     | 28C |       |       |      | CurveFitFailed                           |
| blaCMY                   | 28C |       |       |      | NoAmplification                          |
| blaCMY2-01               | 28C |       |       |      | NoAmplification                          |
| blaCMY2-02               | 28C | 34.55 | 84.96 | 1.92 | MultipleMeltPeaks                        |
| blaCTX-M-01              | 28C | 37.86 | 76.06 | 2.04 | MultipleMeltPeaks                        |
| blaCTX-M-02              | 28C | 37.15 | 80.1  | 1.73 |                                          |
| blaCTX-M-03              | 28C |       |       |      | NoAmplification                          |
| blaCTX-M-04              | 28C | 38.33 | 75.76 | 1.81 | MultipleMeltPeaks                        |
| blaCTX-M-05              | 28C | 36.5  | 75.04 | 1.73 |                                          |
| blaCTX-M-06              | 28C |       |       |      | NoAmplification                          |
| blaGES                   | 28C |       |       |      | LowEfficiency, CtIsSmall, S <sub>e</sub> |
| blaIMP-01                | 28C |       |       |      | NoAmplification                          |
| blaIMP-02                | 28C |       |       |      | LowEfficiency, CtIsSmall, S <sub>e</sub> |
| blaMOX/blaC              | 28C |       |       |      | NoAmplification                          |
| blaOCH                   | 28C |       |       |      | NoAmplification                          |
| blaOKP                   | 28C |       |       |      | NoAmplification                          |
| blaOXA1/blaC             | 28C |       |       |      | NoAmplification                          |
| blaOXA10-01              | 28C |       |       |      | NoAmplification                          |
| blaOXA10-02              | 28C |       |       |      | CurveFitFailed                           |
| blaOXY                   | 28C |       |       |      | NoAmplification                          |
| blaPAO                   | 28C |       |       |      | NoAmplification                          |
| blaPER                   | 28C |       |       |      | CurveFitFailed                           |
| blaPSE                   | 28C |       |       |      | NoAmplification                          |
| blaROB                   | 28C |       |       |      | NoAmplification                          |
| blaSFO                   | 28C | 36.49 | 82.79 | 1.83 |                                          |
| blaSHV-01                | 28C |       |       |      | LowEfficiency, CtIsSmall, Ci             |
| blaSHV-02                | 28C |       |       |      | CurveFitFailed                           |
| blaTEM                   | 28C |       |       |      | NoAmplification                          |
| blaTLA                   | 28C |       |       |      | LowEfficiency, CtIsSmall, S <sub>e</sub> |
| blaVEB                   | 28C |       |       |      | NoAmplification                          |
| blaVIM                   | 28C |       |       |      | NoAmplification                          |
| blaZ                     | 28C | 28.9  | 73.43 | 2.03 |                                          |
| carB                     | 28C | 38.24 | 62.16 | 1.82 | MultipleMeltPeaks                        |
| catA1                    | 28C |       |       |      | NoAmplification                          |
| catB3                    | 28C |       |       |      | NoAmplification                          |
| catB8                    | 28C | 31.66 | 81.9  | 1.99 |                                          |

|            |     |       |       |      |                              |
|------------|-----|-------|-------|------|------------------------------|
| ceoA       | 28C | 30.03 | 82.4  | 1.95 |                              |
| cepA       | 28C |       |       |      | NoAmplification              |
| cfiA       | 28C | 35.89 | 82.01 | 1.88 |                              |
| cfr        | 28C |       |       |      | LowEfficiency, CtIsSmall, S: |
| cfxA       | 28C | 29    | 77.69 | 2.05 |                              |
| cmeA       | 28C |       |       |      | LowEfficiency, CtIsSmall, S: |
| cmlA1-01   | 28C |       |       |      | NoAmplification              |
| cmlA1-02   | 28C | 38.62 | 81.94 | 1.84 | MultipleMeltPeaks            |
| cmr        | 28C |       |       |      | CurveFitFailed               |
| cmx(A)     | 28C | 32.37 | 84.49 | 1.91 |                              |
| cphA-01    | 28C |       |       |      | NoAmplification              |
| cphA-02    | 28C | 34.86 | 77.29 | 1.93 |                              |
| dfrA1      | 28C |       |       |      | NoAmplification              |
| dfrA12     | 28C | 37.89 | 61.37 | 1.85 | MultipleMeltPeaks            |
| emrD       | 28C |       |       |      | NoAmplification              |
| ereA       | 28C |       |       |      | NoAmplification              |
| ereB       | 28C | 31.83 | 88.73 | 2.06 |                              |
| erm(34)    | 28C |       |       |      | NoAmplification              |
| erm(35)    | 28C |       |       |      | LowEfficiency, CtIsSmall, C: |
| erm(36)    | 28C | 44.4  | 62.2  | 1.62 | MultipleMeltPeaks            |
| ermA       | 28C |       |       |      | LowEfficiency, CtIsSmall, S: |
| ermA/ermTR | 28C |       |       |      | NoAmplification              |
| ermB       | 28C | 25.44 | 74.96 | 2.06 |                              |
| ermC       | 28C |       |       |      | NoAmplification              |
| ermF       | 28C |       |       |      | NoAmplification              |
| ermJ/ermD  | 28C |       |       |      | NoAmplification              |
| ermK-01    | 28C | 30.07 | 75.73 | 2.02 |                              |
| ermK-02    | 28C | 39.38 | 85.89 | 1.74 | MultipleMeltPeaks            |
| ermT-01    | 28C |       |       |      | NoAmplification              |
| ermT-02    | 28C |       |       |      | NoAmplification              |
| ermX       | 28C | 38.41 | 61.14 | 1.5  | MultipleMeltPeaks            |
| ermY       | 28C |       |       |      | NoAmplification              |
| fabK       | 28C | 29.4  | 79.21 | 2.05 |                              |
| floR       | 28C |       |       |      | NoAmplification              |
| folA       | 28C |       |       |      | NoAmplification              |
| fosB       | 28C |       |       |      | LowEfficiency, CtIsSmall, S: |
| fosX       | 28C |       |       |      | NoAmplification              |
| fox5       | 28C | 30.58 | 86.92 | 1.91 |                              |
| imiR       | 28C |       |       |      | CurveFitFailed               |
| ImrA-01    | 28C |       |       |      | NoAmplification              |
| intl       | 28C | 33.01 | 84.78 | 1.93 |                              |
| intl1      | 28C | 23.24 | 87.19 | 1.99 |                              |
| IS613      | 28C |       |       |      | CurveFitFailed               |
| lnuA-01    | 28C |       |       |      | LowEfficiency, CtIsSmall, S: |
| lnuB-01    | 28C |       |       |      | LowEfficiency, CtIsSmall, S: |
| lnuB-02    | 28C |       |       |      | CurveFitFailed               |

|               |     |       |       |      |                              |
|---------------|-----|-------|-------|------|------------------------------|
| lnuC          | 28C | 40.61 | 84.26 | 1.48 | MultipleMeltPeaks            |
| marR-01       | 28C |       |       |      | CurveFitFailed               |
| matA/mel      | 28C | 26.87 | 77.3  | 2.02 | MultipleMeltPeaks            |
| mdet1         | 28C |       |       |      | NoAmplification              |
| mdtA          | 28C | 40.48 | 61.96 | 1.59 | MultipleMeltPeaks            |
| mdtE/yhiU     | 28C |       |       |      | NoAmplification              |
| mecA          | 28C |       |       |      | NoAmplification              |
| mefA          | 28C | 28.76 | 80.54 | 1.96 |                              |
| mepA          | 28C | 31.05 | 78.93 | 2.04 |                              |
| mexA          | 28C |       |       |      | NoAmplification              |
| mexD          | 28C |       |       |      | NoAmplification              |
| mexE          | 28C |       |       |      | CurveFitFailed               |
| mexF          | 28C | 29.24 | 83.54 | 1.77 |                              |
| mphA-01       | 28C | 32.63 | 80.88 | 1.96 |                              |
| mphA-02       | 28C | 32.31 | 77.44 | 1.93 |                              |
| mphB          | 28C |       |       |      | CurveFitFailed               |
| mphC          | 28C |       |       |      | NoAmplification              |
| msrA-01       | 28C |       |       |      | CurveFitFailed               |
| msrC-01       | 28C |       |       |      | NoAmplification              |
| mtrC-01       | 28C |       |       |      | NoAmplification              |
| mtrC-02       | 28C | 39.94 | 84.6  | 1.76 |                              |
| mtrD-02       | 28C | 30.59 | 81.49 | 2    |                              |
| mtrD-03       | 28C |       |       |      | NoAmplification              |
| NDM1          | 28C |       |       |      | NoAmplification              |
| nimE          | 28C | 35.01 | 75.46 | 2.04 |                              |
| nisB          | 28C |       |       |      | NoAmplification              |
| oleC          | 28C | 36.13 | 89.6  | 1.83 |                              |
| oprD          | 28C | 34.37 | 81.75 | 1.96 |                              |
| oprJ          | 28C |       |       |      | NoAmplification              |
| pbp           | 28C |       |       |      | LowEfficiency, CtIsSmall, S: |
| pbp2x         | 28C |       |       |      | NoAmplification              |
| Pbp5          | 28C |       |       |      | LowEfficiency, CtIsSmall, C: |
| penA          | 28C |       |       |      | NoAmplification              |
| pikR1         | 28C |       |       |      | NoAmplification              |
| pikR2         | 28C | 32.95 | 85.43 | 1.99 | MultipleMeltPeaks            |
| pmrA          | 28C | 29.65 | 79.92 | 2.05 |                              |
| pncA          | 28C | 34.05 | 86.36 | 1.89 |                              |
| putative muli | 28C |       |       |      | NoAmplification              |
| qac           | 28C | 39.49 | 62.29 | 1.73 | MultipleMeltPeaks            |
| qacA          | 28C |       |       |      | NoAmplification              |
| qacA/qacB     | 28C |       |       |      | NoAmplification              |
| qacEdelta1-0  | 28C | 28.91 | 79.36 | 2.01 |                              |
| qacEdelta1-0  | 28C |       |       |      | CurveFitFailed               |
| qacH-01       | 28C | 38.37 | 75.48 | 1.81 | MultipleMeltPeaks            |
| qacH-02       | 28C | 40.81 | 84.45 | 1.69 |                              |
| qnrA          | 28C |       |       |      | NoAmplification              |



|              |     |       |       |      |                             |
|--------------|-----|-------|-------|------|-----------------------------|
| rarD-02      | 28C |       |       |      | NoAmplification             |
| sat4         | 28C |       |       |      | NoAmplification             |
| sdeB         | 28C |       |       |      | CurveFitFailed              |
| spcN-01      | 28C |       |       |      | NoAmplification             |
| speA         | 28C |       |       |      | NoAmplification             |
| str          | 28C |       |       |      | NoAmplification             |
| strA         | 28C |       |       |      | LowEfficiency, CtIsSmall, C |
| strB         | 28C |       |       |      | NoAmplification             |
| sul1         | 28C |       |       |      | NoAmplification             |
| sul2         | 28C |       |       |      | LowEfficiency, CtIsSmall, S |
| sulA/foIP-01 | 28C | 30.35 | 81.56 | 1.96 |                             |
| sulA/foIP-03 | 28C | 28.6  | 84.29 | 2.01 |                             |
| tet(32)      | 28C |       |       |      | CurveFitFailed              |
| tet(34)      | 28C | 31.07 | 75.72 | 2.03 |                             |
| tet(35)      | 28C |       |       |      | NoAmplification             |
| tet(36)-A    | 28C | 37.53 | 81.96 | 1.77 |                             |
| tet(36)-B    | 28C |       |       |      | CurveFitFailed              |
| tet(37)      | 28C | 38.24 | 81.16 | 1.79 |                             |
| tetA-01      | 28C | 35.51 | 85.04 | 1.84 |                             |
| tetA-02      | 28C |       |       |      | NoAmplification             |
| tetB-01      | 28C |       |       |      | CurveFitFailed              |
| tetB-02      | 28C | 34.3  | 74.32 | 1.93 |                             |
| tetC-01      | 28C |       |       |      | NoAmplification             |
| tetC-02      | 28C |       |       |      | CurveFitFailed              |
| tetD-01      | 28C |       |       |      | NoAmplification             |
| tetD-02      | 28C |       |       |      | NoAmplification             |
| tetE         | 28C |       |       |      | NoAmplification             |
| tetG-01      | 28C | 34.53 | 83.26 | 2.06 | MultipleMeltPeaks           |
| tetG-02      | 28C |       |       |      | LowEfficiency, CtIsSmall, S |
| tetH         | 28C |       |       |      | NoAmplification             |
| tetJ         | 28C |       |       |      | LowEfficiency, CtIsSmall, S |
| tetK         | 28C |       |       |      | CurveFitFailed              |
| tetL-01      | 28C |       |       |      | NoAmplification             |
| tetL-02      | 28C |       |       |      | LowEfficiency, CtIsSmall, S |
| tetM-01      | 28C | 25.6  | 76.12 | 1.98 |                             |
| tetM-02      | 28C | 29.23 | 77.84 | 1.99 |                             |
| tetO-01      | 28C | 29.04 | 76.95 | 1.99 |                             |
| tetPA        | 28C |       |       |      | NoAmplification             |
| tetPB-01     | 28C |       |       |      | NoAmplification             |
| tetPB-02     | 28C | 35.86 | 85.11 | 1.85 |                             |
| tetPB-03     | 28C |       |       |      | NoAmplification             |
| tetPB-05     | 28C |       |       |      | NoAmplification             |
| tetQ         | 28C | 29.21 | 75.96 | 2.02 |                             |
| tetR-02      | 28C |       |       |      | NoAmplification             |
| tetR-03      | 28C |       |       |      | LowEfficiency, CtIsSmall, C |
| tetS         | 28C |       |       |      | CurveFitFailed              |

|             |     |       |       |      |                             |
|-------------|-----|-------|-------|------|-----------------------------|
| tetT        | 28C |       |       |      | NoAmplification             |
| tetU-01     | 28C |       |       |      | NoAmplification             |
| tetV        | 28C |       |       |      | NoAmplification             |
| tetW-01     | 28C | 27.05 | 81.82 | 1.97 |                             |
| tetX        | 28C |       |       |      | NoAmplification             |
| tnpA-01     | 28C |       |       |      | BadR2, LowEfficiency, CtIsS |
| tnpA-02     | 28C | 33.71 | 84.77 | 1.84 |                             |
| tnpA-03     | 28C | 37.49 | 74.92 | 2.2  |                             |
| tnpA-04     | 28C | 39.01 | 83.2  | 1.59 |                             |
| tnpA-05     | 28C |       |       |      | NoAmplification             |
| tnpA-07     | 28C |       |       |      | NoAmplification             |
| tolC-01     | 28C |       |       |      | LowEfficiency, CtIsSmall, S |
| tolC-02     | 28C | 32.28 | 88.66 | 1.85 |                             |
| tolC-03     | 28C | 32.56 | 85.94 | 1.94 |                             |
| Tp614       | 28C | 38.24 | 73.6  | 1.7  | MultipleMeltPeaks           |
| ttgA        | 28C |       |       |      | NoAmplification             |
| ttgB        | 28C |       |       |      | CurveFitFailed              |
| vanA        | 28C |       |       |      | NoAmplification             |
| vanB-01     | 28C |       |       |      | CurveFitFailed              |
| vanC-01     | 28C |       |       |      | NoAmplification             |
| vanC-02     | 28C |       |       |      | NoAmplification             |
| vanC-03     | 28C | 30.67 | 86.09 | 1.91 |                             |
| vanC1       | 28C |       |       |      | NoAmplification             |
| vanC2/vanC3 | 28C | 37.82 | 82.71 | 1.77 | MultipleMeltPeaks           |
| vanG        | 28C | 32.97 | 72.34 | 2.12 |                             |
| vanHB       | 28C |       |       |      | CurveFitFailed              |
| vanHD       | 28C |       |       |      | CurveFitFailed              |
| vanRA-01    | 28C |       |       |      | LowEfficiency, CtIsSmall, S |
| vanRA-02    | 28C | 35.29 | 81.47 | 1.78 | MultipleMeltPeaks           |
| vanRB       | 28C | 40.95 | 73.45 | 1.77 |                             |
| vanRC       | 28C |       |       |      | NoAmplification             |
| vanRC4      | 28C |       |       |      | CurveFitFailed              |
| vanRD       | 28C |       |       |      | NoAmplification             |
| vanSA       | 28C |       |       |      | NoAmplification             |
| vanSB       | 28C | 30.1  | 74.67 | 2.07 |                             |
| vanSC-01    | 28C |       |       |      | NoAmplification             |
| vanSC-02    | 28C |       |       |      | NoAmplification             |
| vanTC-01    | 28C |       |       |      | NoAmplification             |
| vanTC-02    | 28C | 43.06 | 61.1  | 1.45 | MultipleMeltPeaks           |
| vanTE       | 28C |       |       |      | NoAmplification             |
| vanTG       | 28C |       |       |      | NoAmplification             |
| vanWB       | 28C |       |       |      | NoAmplification             |
| vanWG       | 28C |       |       |      | NoAmplification             |
| vanXA       | 28C |       |       |      | NoAmplification             |
| vanXB       | 28C |       |       |      | NoAmplification             |
| vanXD       | 28C | 35.8  | 74.37 | 1.94 |                             |

|              |     |       |       |      |                              |
|--------------|-----|-------|-------|------|------------------------------|
| vanYB        | 28C | 35.08 | 78.27 | 1.94 | MultipleMeltPeaks            |
| vanYD-01     | 28C | 33.5  | 82.05 | 1.85 |                              |
| vanYD-02     | 28C |       |       |      | NoAmplification              |
| vatB-01      | 28C |       |       |      | LowEfficiency, CtIsSmall, S: |
| vatB-02      | 28C |       |       |      | CurveFitFailed               |
| vatC-01      | 28C |       |       |      | LowEfficiency, CtIsSmall, S: |
| vatC-02      | 28C | 38.49 | 83.47 | 1.78 |                              |
| vatE-01      | 28C | 31.26 | 76.68 | 2.13 |                              |
| vatE-02      | 28C |       |       |      | CurveFitFailed               |
| vgaA-01      | 28C |       |       |      | NoAmplification              |
| vgaA-02      | 28C |       |       |      | CurveFitFailed               |
| vgb-01       | 28C | 37.17 | 75.16 | 1.84 |                              |
| vgbB-01      | 28C |       |       |      | NoAmplification              |
| vgbB-02      | 28C |       |       |      | NoAmplification              |
| yceE/mdtG-0  | 28C |       |       |      | NoAmplification              |
| yceE/mdtG-0  | 28C |       |       |      | NoAmplification              |
| yceL/mdtH-0  | 28C | 32.05 | 85.4  | 1.94 |                              |
| yceL/mdtH-0  | 28C |       |       |      | NoAmplification              |
| yceL/mdtH-0  | 28C | 35.55 | 82.79 | 1.88 |                              |
| yidY/mdtL-01 | 28C | 32.66 | 82.84 | 1.96 |                              |
| yidY/mdtL-02 | 28C |       |       |      | CurveFitFailed               |































| Assay          | Sample | Ct | Tm    | Efficiency | flag                        |
|----------------|--------|----|-------|------------|-----------------------------|
| 16S rRNA       | 29A    |    | 17.96 | 82.35      | 2.04                        |
| aac            | 29A    |    | 32.04 | 82.05      | 1.75 MultipleMeltPeaks      |
| aac(6')-Ib(akz | 29A    |    |       |            | LowEfficiency, CtIsSmall, C |
| aac(6')-Ib(akz | 29A    |    | 31.68 | 84.84      | 1.99 MultipleMeltPeaks      |
| aac(6')-Ib(akz | 29A    |    | 34.1  | 87.28      | 1.89                        |
| aac(6')-II     | 29A    |    | 35.85 | 89.81      | 1.85 MultipleMeltPeaks      |
| aac(6')I1      | 29A    |    | 36.55 | 88.72      | 1.75 MultipleMeltPeaks      |
| aacA/aphD      | 29A    |    |       |            | LowEfficiency, CtIsSmall, S |
| aacC           | 29A    |    | 34.09 | 86.07      | 1.88 MultipleMeltPeaks      |
| aacC1          | 29A    |    | 40.31 | 84.24      | 1.75                        |
| aacC2          | 29A    |    |       |            | NoAmplification             |
| aacC4          | 29A    |    | 34.92 | 83.58      | 1.9 MultipleMeltPeaks       |
| aadA-01        | 29A    |    |       |            | LowEfficiency, CtIsSmall, C |
| aadA-02        | 29A    |    | 38.21 | 79.45      | 1.78 MultipleMeltPeaks      |
| aadA-1-01      | 29A    |    |       |            | NoAmplification             |
| aadA-1-02      | 29A    |    |       |            | LowEfficiency, CtIsSmall, S |
| aadA1          | 29A    |    | 32.47 | 83.69      | 1.99                        |
| aadA2-01       | 29A    |    |       |            | NoAmplification             |
| aadA2-02       | 29A    |    | 31.88 | 75.63      | 2.05                        |
| aadA2-03       | 29A    |    |       |            | NoAmplification             |
| aadA5-01       | 29A    |    | 36.63 | 80.07      | 1.88 MultipleMeltPeaks      |
| aadA5-02       | 29A    |    | 31.76 | 81.25      | 1.97 MultipleMeltPeaks      |
| aadA9-01       | 29A    |    | 33.04 | 83.71      | 1.95 MultipleMeltPeaks      |
| aadA9-02       | 29A    |    | 36.08 | 84.09      | 1.89                        |
| aadD           | 29A    |    |       |            | CurveFitFailed              |
| aadE           | 29A    |    |       |            | LowEfficiency, CtIsSmall, S |
| acrA-01        | 29A    |    | 31.2  | 89.1       | 2.01                        |
| acrA-02        | 29A    |    | 40.08 | 81.18      | 1.7 MultipleMeltPeaks       |
| acrA-03        | 29A    |    | 36.22 | 90.19      | 1.82 MultipleMeltPeaks      |
| acrA-04        | 29A    |    | 32.36 | 80.91      | 2.02                        |
| acrA-05        | 29A    |    | 29.48 | 83.96      | 1.98 MultipleMeltPeaks      |
| acrB-01        | 29A    |    | 36.99 | 76.19      | 1.88                        |
| acrF           | 29A    |    | 31.46 | 81.71      | 1.78 MultipleMeltPeaks      |
| acrR-01        | 29A    |    | 36.46 | 81.21      | 1.77 MultipleMeltPeaks      |
| acrR-02        | 29A    |    | 34.22 | 87.17      | 1.88                        |
| Actin          | 29A    |    | 20.82 | 87.22      | 2                           |
| adeA           | 29A    |    | 34.83 | 88.18      | 1.88                        |
| ampC-01        | 29A    |    | 32.65 | 85.6       | 1.99                        |
| ampC-02        | 29A    |    |       |            | LowEfficiency, CtIsSmall, S |
| ampC-04        | 29A    |    | 32.55 | 77.97      | 1.71 MultipleMeltPeaks      |
| ampC-05        | 29A    |    |       |            | LowEfficiency, CtIsSmall, C |
| ampC-06        | 29A    |    |       |            | LowEfficiency, CtIsSmall, S |
| ampC-07        | 29A    |    | 34.49 | 88.28      | 1.91                        |
| ampC-09        | 29A    |    |       |            | CurveFitFailed              |
| ampC/blaDH     | 29A    |    | 27.86 | 84.76      | 1.98                        |

|                            |     |       |       |      |                              |
|----------------------------|-----|-------|-------|------|------------------------------|
| aph                        | 29A |       |       |      | LowEfficiency, CtIsSmall, S: |
| aph(2')-Id-01              | 29A |       |       |      | LowEfficiency, CtIsSmall, S: |
| aph(2')-Id-02              | 29A |       |       |      | LowEfficiency, CtIsSmall, C: |
| aph6ia                     | 29A | 31.59 | 78.04 | 2.01 | MultipleMeltPeaks            |
| aphA1(aka k <sub>z</sub> ) | 29A |       |       |      | LowEfficiency, CtIsSmall, S: |
| bacA-01                    | 29A | 39.86 | 83.91 | 1.74 | MultipleMeltPeaks            |
| bacA-02                    | 29A | 38.62 | 85.9  | 1.67 | MultipleMeltPeaks            |
| BETA-globin                | 29A | 23.92 | 84.28 | 2    |                              |
| bla-ACC-1                  | 29A | 35.7  | 85.93 | 1.83 |                              |
| bla-L1                     | 29A | 27.46 | 86.34 | 2.01 |                              |
| bla1                       | 29A |       |       |      | LowEfficiency, CtIsSmall, C: |
| blaCMY                     | 29A |       |       |      | CurveFitFailed               |
| blaCMY2-01                 | 29A | 40.93 | 79.88 | 1.64 | MultipleMeltPeaks            |
| blaCMY2-02                 | 29A | 28.87 | 89.92 | 1.98 | MultipleMeltPeaks            |
| blaCTX-M-01                | 29A | 35.98 | 87.06 | 2.02 | MultipleMeltPeaks            |
| blaCTX-M-02                | 29A | 34.88 | 88.35 | 1.94 | MultipleMeltPeaks            |
| blaCTX-M-03                | 29A |       |       |      | LowEfficiency, CtIsSmall, S: |
| blaCTX-M-04                | 29A | 33.21 | 84.54 | 1.92 |                              |
| blaCTX-M-05                | 29A | 32.8  | 75.93 | 1.87 |                              |
| blaCTX-M-06                | 29A | 39.83 | 64.61 | 1.68 | MultipleMeltPeaks            |
| blaGES                     | 29A |       |       |      | LowEfficiency, CtIsSmall, C: |
| blaIMP-01                  | 29A |       |       |      | NoAmplification              |
| blaIMP-02                  | 29A | 37.33 | 76.29 | 1.86 |                              |
| blaMOX/blaC                | 29A | 34.93 | 82.33 | 1.93 |                              |
| blaOCH                     | 29A |       |       |      | NoAmplification              |
| blaOKP                     | 29A |       |       |      | NoAmplification              |
| blaOXA1/blaC               | 29A |       |       |      | LowEfficiency, CtIsSmall, S: |
| blaOXA10-01                | 29A |       |       |      | LowEfficiency, CtIsSmall, S: |
| blaOXA10-02                | 29A |       |       |      | CurveFitFailed               |
| blaOXY                     | 29A | 33.59 | 90.06 | 1.77 | MultipleMeltPeaks            |
| blaPAO                     | 29A |       |       |      | LowEfficiency, CtIsSmall, C: |
| blaPER                     | 29A | 38.32 | 79.26 | 1.81 |                              |
| blaPSE                     | 29A |       |       |      | NoAmplification              |
| blaROB                     | 29A | 40.97 | 62.02 | 1.62 | MultipleMeltPeaks            |
| blaSFO                     | 29A | 31.25 | 82.38 | 1.97 | MultipleMeltPeaks            |
| blaSHV-01                  | 29A |       |       |      | CurveFitFailed               |
| blaSHV-02                  | 29A |       |       |      | LowEfficiency, CtIsSmall, C: |
| blaTEM                     | 29A |       |       |      | NoAmplification              |
| blaTLA                     | 29A |       |       |      | LowEfficiency, CtIsSmall, C: |
| blaVEB                     | 29A |       |       |      | NoAmplification              |
| blaVIM                     | 29A |       |       |      | NoAmplification              |
| blaZ                       | 29A |       |       |      | LowEfficiency, CtIsSmall, S: |
| carB                       | 29A |       |       |      | LowEfficiency, CtIsSmall, S: |
| catA1                      | 29A |       |       |      | NoAmplification              |
| catB3                      | 29A | 30.64 | 87.63 | 1.92 |                              |
| catB8                      | 29A | 26.83 | 81.91 | 1.94 | MultipleMeltPeaks            |

|            |     |       |       |      |                              |
|------------|-----|-------|-------|------|------------------------------|
| ceoA       | 29A | 28.08 | 82.29 | 1.97 |                              |
| cepA       | 29A | 38.9  | 77.45 | 1.78 | MultipleMeltPeaks            |
| cfiA       | 29A | 33.67 | 85.31 | 1.93 | MultipleMeltPeaks            |
| cfr        | 29A |       |       |      | CurveFitFailed               |
| cfxA       | 29A | 27.72 | 77.8  | 2.05 |                              |
| cmeA       | 29A |       |       |      | LowEfficiency, CtIsSmall, Ci |
| cmlA1-01   | 29A | 36.63 | 80.46 | 1.82 | MultipleMeltPeaks            |
| cmlA1-02   | 29A |       |       |      | CurveFitFailed               |
| cmr        | 29A |       |       |      | CurveFitFailed               |
| cmx(A)     | 29A | 30.51 | 84.39 | 1.83 |                              |
| cphA-01    | 29A | 35.04 | 85.9  | 1.82 | MultipleMeltPeaks            |
| cphA-02    | 29A | 35.08 | 82.93 | 1.9  |                              |
| dfrA1      | 29A |       |       |      | NoAmplification              |
| dfrA12     | 29A | 37.61 | 82.78 | 1.71 | MultipleMeltPeaks            |
| emrD       | 29A | 41.16 | 84.25 | 1.67 | MultipleMeltPeaks            |
| ereA       | 29A | 37.37 | 83.49 | 1.82 |                              |
| ereB       | 29A | 35.07 | 89.25 | 2.01 | MultipleMeltPeaks            |
| erm(34)    | 29A | 37.73 | 87.82 | 1.7  | MultipleMeltPeaks            |
| erm(35)    | 29A |       |       |      | LowEfficiency, CtIsSmall, Ci |
| erm(36)    | 29A | 34.04 | 85.99 | 2.09 |                              |
| ermA       | 29A |       |       |      | LowEfficiency, CtIsSmall, S: |
| ermA/ermTR | 29A |       |       |      | NoAmplification              |
| ermB       | 29A |       |       |      | LowEfficiency, CtIsSmall, S: |
| ermC       | 29A |       |       |      | LowEfficiency, CtIsSmall, S: |
| ermF       | 29A |       |       |      | LowEfficiency, CtIsSmall, S: |
| ermJ/ermD  | 29A | 40.17 | 61.17 | 1.49 | MultipleMeltPeaks            |
| ermK-01    | 29A | 35.73 | 74.13 | 1.93 |                              |
| ermK-02    | 29A | 39.13 | 83.22 | 1.7  | MultipleMeltPeaks            |
| ermT-01    | 29A |       |       |      | CurveFitFailed               |
| ermT-02    | 29A |       |       |      | NoAmplification              |
| ermX       | 29A | 36.49 | 84.06 | 1.74 | MultipleMeltPeaks            |
| ermY       | 29A |       |       |      | NoAmplification              |
| fabK       | 29A | 21.23 | 77.63 | 2.16 |                              |
| floR       | 29A |       |       |      | NoAmplification              |
| folA       | 29A |       |       |      | NoAmplification              |
| fosB       | 29A |       |       |      | LowEfficiency, CtIsSmall, S: |
| fosX       | 29A |       |       |      | LowEfficiency, CtIsSmall, Ci |
| fox5       | 29A | 28.72 | 88.19 | 1.96 |                              |
| imiR       | 29A |       |       |      | NoAmplification              |
| ImrA-01    | 29A | 32.73 | 82.79 | 1.99 |                              |
| intl       | 29A | 28.96 | 84.74 | 1.97 | MultipleMeltPeaks            |
| intl1      | 29A | 20.41 | 87.26 | 1.98 |                              |
| IS613      | 29A |       |       |      | CurveFitFailed               |
| lnuA-01    | 29A |       |       |      | LowEfficiency, CtIsSmall, S: |
| lnuB-01    | 29A |       |       |      | CurveFitFailed               |
| lnuB-02    | 29A | 38.94 | 86.78 | 1.82 | MultipleMeltPeaks            |

|                |     |       |       |      |                              |
|----------------|-----|-------|-------|------|------------------------------|
| lnuC           | 29A | 31.67 | 87.46 | 1.88 |                              |
| marR-01        | 29A | 37.43 | 85.52 | 1.71 | MultipleMeltPeaks            |
| matA/mel       | 29A | 20.72 | 77.61 | 2.08 |                              |
| mdetI1         | 29A |       |       |      | LowEfficiency, CtIsSmall, Ci |
| mdtA           | 29A | 36.08 | 79.09 | 1.76 | MultipleMeltPeaks            |
| mdtE/yhiU      | 29A | 35.89 | 75.65 | 1.79 | MultipleMeltPeaks            |
| mecA           | 29A |       |       |      | CurveFitFailed               |
| mefA           | 29A | 20.55 | 80.45 | 2    |                              |
| mepA           | 29A | 33.01 | 84.8  | 2.02 |                              |
| mexA           | 29A |       |       |      | CurveFitFailed               |
| mexD           | 29A | 32.95 | 80.27 | 2.08 |                              |
| mexE           | 29A | 31.73 | 83.2  | 2.02 |                              |
| mexF           | 29A | 28.93 | 81.57 | 1.89 |                              |
| mphA-01        | 29A | 30.16 | 89.4  | 1.98 | MultipleMeltPeaks            |
| mphA-02        | 29A | 30.45 | 88.13 | 1.39 | MultipleMeltPeaks            |
| mphB           | 29A |       |       |      | CurveFitFailed               |
| mphC           | 29A |       |       |      | LowEfficiency, CtIsSmall, Ci |
| msrA-01        | 29A | 35.98 | 72.5  | 1.96 |                              |
| msrC-01        | 29A |       |       |      | NoAmplification              |
| mtrC-01        | 29A |       |       |      | LowEfficiency, CtIsSmall, Ci |
| mtrC-02        | 29A | 33.32 | 84.35 | 1.98 |                              |
| mtrD-02        | 29A | 28.33 | 81.45 | 1.91 |                              |
| mtrD-03        | 29A | 37.99 | 79.65 | 1.7  | MultipleMeltPeaks            |
| NDM1           | 29A |       |       |      | NoAmplification              |
| nimE           | 29A | 37.43 | 85.01 | 1.9  | MultipleMeltPeaks            |
| nisB           | 29A |       |       |      | NoAmplification              |
| oleC           | 29A | 37.26 | 88    | 1.79 | MultipleMeltPeaks            |
| oprD           | 29A | 28.65 | 86.59 | 2.01 | MultipleMeltPeaks            |
| oprJ           | 29A | 34.65 | 90.77 | 1.89 |                              |
| pbp            | 29A |       |       |      | LowEfficiency, CtIsSmall, S: |
| pbp2x          | 29A | 20.91 | 75.69 | 1.95 |                              |
| Pbp5           | 29A |       |       |      | CurveFitFailed               |
| penA           | 29A | 35.39 | 87.55 | 1.76 |                              |
| pikR1          | 29A | 33.48 | 87.43 | 1.93 | MultipleMeltPeaks            |
| pikR2          | 29A | 31.51 | 84.87 | 1.96 | MultipleMeltPeaks            |
| pmrA           | 29A | 23.01 | 80.11 | 2.12 |                              |
| pncA           | 29A | 34.61 | 82.3  | 1.87 |                              |
| putative multi | 29A | 37.04 | 77.35 | 1.86 | MultipleMeltPeaks            |
| qac            | 29A | 35.93 | 79.46 | 1.92 |                              |
| qacA           | 29A | 31.61 | 70.97 | 1.91 |                              |
| qacA/qacB      | 29A | 39.25 | 84.95 | 1.49 | MultipleMeltPeaks            |
| qacEdelta1-0   | 29A |       |       |      | NoAmplification              |
| qacEdelta1-0   | 29A | 35.77 | 77.24 | 1.89 | MultipleMeltPeaks            |
| qacH-01        | 29A | 33.09 | 87.01 | 1.99 |                              |
| qacH-02        | 29A | 34.41 | 84.31 | 1.71 |                              |
| qnrA           | 29A | 29.06 | 83.25 | 1.99 |                              |

|              |     |       |       |      |                              |
|--------------|-----|-------|-------|------|------------------------------|
| rarD-02      | 29A | 30.66 | 85.86 | 2.03 |                              |
| sat4         | 29A |       |       |      | NoAmplification              |
| sdeB         | 29A |       |       |      | LowEfficiency, CtIsSmall, S: |
| spcN-01      | 29A | 37.59 | 87.28 | 1.76 |                              |
| speA         | 29A |       |       |      | NoAmplification              |
| str          | 29A |       |       |      | CurveFitFailed               |
| strA         | 29A |       |       |      | CurveFitFailed               |
| strB         | 29A | 29.37 | 84    | 1.95 |                              |
| sul1         | 29A | 37.09 | 82.89 | 1.71 | MultipleMeltPeaks            |
| sul2         | 29A |       |       |      | LowEfficiency, CtIsSmall, S: |
| sulA/foIP-01 | 29A | 21.67 | 82.09 | 2.02 |                              |
| sulA/foIP-03 | 29A | 20.76 | 83.56 | 2.04 |                              |
| tet(32)      | 29A | 29.94 | 80.98 | 2.02 |                              |
| tet(34)      | 29A | 31.43 | 75.73 | 2.04 |                              |
| tet(35)      | 29A | 37.81 | 75.2  | 1.89 | MultipleMeltPeaks            |
| tet(36)-A    | 29A |       |       |      | CurveFitFailed               |
| tet(36)-B    | 29A |       |       |      | LowEfficiency, CtIsSmall, S: |
| tet(37)      | 29A | 27.63 | 75.7  | 1.98 | MultipleMeltPeaks            |
| tetA-01      | 29A | 32.13 | 85.05 | 1.98 |                              |
| tetA-02      | 29A | 38.79 | 86.67 | 1.8  | MultipleMeltPeaks            |
| tetB-01      | 29A | 28.75 | 79.42 | 1.98 | MultipleMeltPeaks            |
| tetB-02      | 29A | 34.28 | 76.25 | 1.93 |                              |
| tetC-01      | 29A |       |       |      | NoAmplification              |
| tetC-02      | 29A |       |       |      | CurveFitFailed               |
| tetD-01      | 29A |       |       |      | LowEfficiency, CtIsSmall, S: |
| tetD-02      | 29A | 34.57 | 76.6  | 1.98 |                              |
| tetE         | 29A |       |       |      | CurveFitFailed               |
| tetG-01      | 29A | 34.19 | 87    | 2.12 | MultipleMeltPeaks            |
| tetG-02      | 29A | 36.76 | 88.92 | 1.74 | MultipleMeltPeaks            |
| tetH         | 29A |       |       |      | LowEfficiency, CtIsSmall, C: |
| tetJ         | 29A |       |       |      | CurveFitFailed               |
| tetK         | 29A |       |       |      | LowEfficiency, CtIsSmall, C: |
| tetL-01      | 29A | 38.76 | 62.48 | 1.81 | MultipleMeltPeaks            |
| tetL-02      | 29A |       |       |      | CurveFitFailed               |
| tetM-01      | 29A | 22.87 | 76.13 | 2.01 |                              |
| tetM-02      | 29A | 22.92 | 78.16 | 2.01 |                              |
| tetO-01      | 29A |       |       |      | NoAmplification              |
| tetPA        | 29A |       |       |      | NoAmplification              |
| tetPB-01     | 29A | 37.01 | 78.2  | 2.02 | BadR2, MultipleMeltPeaks     |
| tetPB-02     | 29A | 35.11 | 85.12 | 1.88 |                              |
| tetPB-03     | 29A |       |       |      | LowEfficiency, CtIsSmall, S: |
| tetPB-05     | 29A |       |       |      | LowEfficiency, CtIsSmall, S: |
| tetQ         | 29A | 26.19 | 76.01 | 2.02 |                              |
| tetR-02      | 29A | 33.12 | 79.64 | 1.8  | MultipleMeltPeaks            |
| tetR-03      | 29A |       |       |      | CurveFitFailed               |
| tetS         | 29A | 33.44 | 86.77 | 2.15 | MultipleMeltPeaks            |

|             |     |       |       |      |                              |
|-------------|-----|-------|-------|------|------------------------------|
| tetT        | 29A |       |       |      | NoAmplification              |
| tetU-01     | 29A |       |       |      | LowEfficiency, CtIsSmall, Ci |
| tetV        | 29A |       |       |      | CurveFitFailed               |
| tetW-01     | 29A |       |       |      | CurveFitFailed               |
| tetX        | 29A |       |       |      | BadR2, CtIsSmall, Saturatio  |
| tnpA-01     | 29A |       |       |      | CurveFitFailed               |
| tnpA-02     | 29A | 34.27 | 85.04 | 1.72 | MultipleMeltPeaks            |
| tnpA-03     | 29A | 23.18 | 78.25 | 2.11 |                              |
| tnpA-04     | 29A | 41.15 | 63.99 | 1.6  | MultipleMeltPeaks            |
| tnpA-05     | 29A |       |       |      | LowEfficiency, CtIsSmall, Ci |
| tnpA-07     | 29A |       |       |      | CurveFitFailed               |
| tolC-01     | 29A |       |       |      | CurveFitFailed               |
| tolC-02     | 29A | 29.47 | 87.54 | 2.02 | MultipleMeltPeaks            |
| tolC-03     | 29A | 30.7  | 87.64 | 2.01 | MultipleMeltPeaks            |
| Tp614       | 29A |       |       |      | CurveFitFailed               |
| ttgA        | 29A | 40.86 | 81.55 | 1.7  | MultipleMeltPeaks            |
| ttgB        | 29A | 37.32 | 79.7  | 1.98 | MultipleMeltPeaks            |
| vanA        | 29A |       |       |      | NoAmplification              |
| vanB-01     | 29A | 37.53 | 83.92 | 1.75 | MultipleMeltPeaks            |
| vanC-01     | 29A | 36.81 | 78.63 | 1.85 |                              |
| vanC-02     | 29A |       |       |      | LowEfficiency, CtIsSmall, S: |
| vanC-03     | 29A | 25.43 | 86.31 | 1.93 | MultipleMeltPeaks            |
| vanC1       | 29A |       |       |      | LowEfficiency, CtIsSmall, Ci |
| vanC2/vanC3 | 29A | 32.86 | 80.49 | 2.01 | MultipleMeltPeaks            |
| vanG        | 29A |       |       |      | BadR2, CtIsSmall, Saturatio  |
| vanHB       | 29A | 36.81 | 86.61 | 1.85 |                              |
| vanHD       | 29A |       |       |      | LowEfficiency, CtIsSmall, S: |
| vanRA-01    | 29A |       |       |      | LowEfficiency, CtIsSmall, Ci |
| vanRA-02    | 29A | 38.48 | 78.85 | 1.83 |                              |
| vanRB       | 29A | 35.37 | 81.64 | 1.85 |                              |
| vanRC       | 29A |       |       |      | LowEfficiency, CtIsSmall, Ci |
| vanRC4      | 29A |       |       |      | LowEfficiency, CtIsSmall, S: |
| vanRD       | 29A |       |       |      | NoAmplification              |
| vanSA       | 29A |       |       |      | LowEfficiency, CtIsSmall, S: |
| vanSB       | 29A | 34.17 | 74.24 | 2.02 |                              |
| vanSC-01    | 29A | 37.79 | 87.02 | 1.78 | MultipleMeltPeaks            |
| vanSC-02    | 29A |       |       |      | NoAmplification              |
| vanTC-01    | 29A |       |       |      | LowEfficiency, CtIsSmall, S: |
| vanTC-02    | 29A | 40.67 | 61.68 | 1.55 | MultipleMeltPeaks            |
| vanTE       | 29A |       |       |      | NoAmplification              |
| vanTG       | 29A |       |       |      | NoAmplification              |
| vanWB       | 29A |       |       |      | LowEfficiency, CtIsSmall, S: |
| vanWG       | 29A | 33.21 | 75.37 | 2.01 |                              |
| vanXA       | 29A |       |       |      | LowEfficiency, CtIsSmall, S: |
| vanXB       | 29A |       |       |      | NoAmplification              |
| vanXD       | 29A | 29.68 | 76.09 | 2.09 |                              |

|              |     |       |       |      |                              |
|--------------|-----|-------|-------|------|------------------------------|
| vanYB        | 29A | 32.91 | 85.97 | 1.98 |                              |
| vanYD-01     | 29A | 32.97 | 85.26 | 1.93 |                              |
| vanYD-02     | 29A | 44.54 | 61.7  | 1.61 | BadR2, MultipleMeltPeaks     |
| vatB-01      | 29A |       |       |      | LowEfficiency, CtIsSmall, Ct |
| vatB-02      | 29A | 34.09 | 80.19 | 2.08 |                              |
| vatC-01      | 29A |       |       |      | CurveFitFailed               |
| vatC-02      | 29A | 37.05 | 87.06 | 1.79 |                              |
| vatE-01      | 29A | 31.79 | 77.02 | 2.09 |                              |
| vatE-02      | 29A |       |       |      | NoAmplification              |
| vgaA-01      | 29A |       |       |      | LowEfficiency, CtIsSmall, S: |
| vgaA-02      | 29A |       |       |      | CurveFitFailed               |
| vgb-01       | 29A |       |       |      | NoAmplification              |
| vgbB-01      | 29A | 38.75 | 77.33 | 1.74 |                              |
| vgbB-02      | 29A |       |       |      | NoAmplification              |
| yceE/mdtG-0  | 29A | 36.68 | 81.21 | 1.83 |                              |
| yceE/mdtG-0  | 29A |       |       |      | NoAmplification              |
| yceL/mdtH-0  | 29A | 29.63 | 75.95 | 1.94 | MultipleMeltPeaks            |
| yceL/mdtH-0  | 29A |       |       |      | NoAmplification              |
| yceL/mdtH-0  | 29A | 33.14 | 89.62 | 1.88 |                              |
| yidY/mdtL-01 | 29A | 31.87 | 84.99 | 2.01 | MultipleMeltPeaks            |
| yidY/mdtL-02 | 29A |       |       |      | BadR2, LowEfficiency, CtIsS  |































| Assay           | Sample | Ct | Tm    | Efficiency | flag                         |
|-----------------|--------|----|-------|------------|------------------------------|
| 16S rRNA        | 29B    |    | 15.04 | 82.4       | 2.01                         |
| aac             | 29B    |    | 29.9  | 88.26      | 1.86                         |
| aac(6')-Ib(akz) | 29B    |    |       |            | LowEfficiency, CtIsSmall, S: |
| aac(6')-Ib(akz) | 29B    |    | 30.86 | 86.59      | 2.02                         |
| aac(6')-Ib(akz) | 29B    |    | 33.83 | 79.1       | 2.01                         |
| aac(6')-II      | 29B    |    | 35.36 | 90.39      | 1.88                         |
| aac(6')I1       | 29B    |    | 33.16 | 90.67      | 1.91                         |
| aacA/aphD       | 29B    |    |       |            | LowEfficiency, CtIsSmall, Ci |
| aacC            | 29B    |    | 27.45 | 88.68      | 1.88 MultipleMeltPeaks       |
| aacC1           | 29B    |    |       |            | CurveFitFailed               |
| aacC2           | 29B    |    |       |            | LowEfficiency, CtIsSmall, Ci |
| aacC4           | 29B    |    | 31.15 | 89.28      | 1.78                         |
| aadA-01         | 29B    |    |       |            | CurveFitFailed               |
| aadA-02         | 29B    |    |       |            | CurveFitFailed               |
| aadA-1-01       | 29B    |    | 34.39 | 81.94      | 1.91                         |
| aadA-1-02       | 29B    |    |       |            | LowEfficiency, CtIsSmall, S: |
| aadA1           | 29B    |    | 35.01 | 84.33      | 1.91                         |
| aadA2-01        | 29B    |    | 35.24 | 86.75      | 1.76                         |
| aadA2-02        | 29B    |    | 32.36 | 75.55      | 1.97                         |
| aadA2-03        | 29B    |    | 38.5  | 89.58      | 1.81 MultipleMeltPeaks       |
| aadA5-01        | 29B    |    |       |            | CurveFitFailed               |
| aadA5-02        | 29B    |    | 33.17 | 78.09      | 2.03 MultipleMeltPeaks       |
| aadA9-01        | 29B    |    | 33.88 | 80.27      | 1.92                         |
| aadA9-02        | 29B    |    |       |            | CurveFitFailed               |
| aadD            | 29B    |    |       |            | LowEfficiency, CtIsSmall, S: |
| aadE            | 29B    |    |       |            | LowEfficiency, CtIsSmall, S: |
| acrA-01         | 29B    |    | 30.87 | 89.41      | 1.91 MultipleMeltPeaks       |
| acrA-02         | 29B    |    | 32.45 | 88.28      | 1.94                         |
| acrA-03         | 29B    |    | 33.92 | 90.51      | 1.94                         |
| acrA-04         | 29B    |    | 30.8  | 81.06      | 2                            |
| acrA-05         | 29B    |    | 28.63 | 87         | 1.96 MultipleMeltPeaks       |
| acrB-01         | 29B    |    | 33.43 | 89.41      | 1.9                          |
| acrF            | 29B    |    | 33.3  | 85         | 1.94                         |
| acrR-01         | 29B    |    | 31.39 | 88.37      | 1.99 MultipleMeltPeaks       |
| acrR-02         | 29B    |    | 30.63 | 86.76      | 2.02                         |
| Actin           | 29B    |    | 22.72 | 83.76      | 1.97 MultipleMeltPeaks       |
| adeA            | 29B    |    | 32.27 | 83.68      | 1.89                         |
| ampC-01         | 29B    |    | 30.9  | 85.17      | 1.82 MultipleMeltPeaks       |
| ampC-02         | 29B    |    | 34.9  | 78.57      | 2.03                         |
| ampC-04         | 29B    |    | 34.01 | 77.64      | 1.7 MultipleMeltPeaks        |
| ampC-05         | 29B    |    | 36.18 | 90.42      | 1.7 MultipleMeltPeaks        |
| ampC-06         | 29B    |    |       |            | CurveFitFailed               |
| ampC-07         | 29B    |    | 34.67 | 88.09      | 1.86 MultipleMeltPeaks       |
| ampC-09         | 29B    |    |       |            | CurveFitFailed               |
| ampC/blaDH      | 29B    |    | 29.02 | 84.84      | 1.95                         |

|                          |     |       |       |      |                              |
|--------------------------|-----|-------|-------|------|------------------------------|
| aph                      | 29B |       |       |      | CurveFitFailed               |
| aph(2')-Id-01            | 29B |       |       |      | LowEfficiency, CtIsSmall, S: |
| aph(2')-Id-02            | 29B |       |       |      | CurveFitFailed               |
| aph6ia                   | 29B | 28.99 | 78.05 | 2.01 |                              |
| aphA1(aka k <sub>z</sub> | 29B |       |       |      | CurveFitFailed               |
| bacA-01                  | 29B |       |       |      | LowEfficiency, CtIsSmall, S: |
| bacA-02                  | 29B |       |       |      | CurveFitFailed               |
| BETA-globin              | 29B | 22.66 | 84.29 | 2.02 |                              |
| bla-ACC-1                | 29B | 34.3  | 86.16 | 1.87 |                              |
| bla-L1                   | 29B | 28.43 | 86    | 2.01 | MultipleMeltPeaks            |
| bla1                     | 29B |       |       |      | CurveFitFailed               |
| blaCMY                   | 29B | 35.57 | 81.69 | 1.92 |                              |
| blaCMY2-01               | 29B | 33.62 | 80.13 | 2.02 |                              |
| blaCMY2-02               | 29B | 28.17 | 85.73 | 2.03 | MultipleMeltPeaks            |
| blaCTX-M-01              | 29B | 33.86 | 87.69 | 1.88 | MultipleMeltPeaks            |
| blaCTX-M-02              | 29B |       |       |      | NoAmplification              |
| blaCTX-M-03              | 29B |       |       |      | LowEfficiency, CtIsSmall, S: |
| blaCTX-M-04              | 29B | 29.59 | 88.17 | 1.98 | MultipleMeltPeaks            |
| blaCTX-M-05              | 29B | 33.33 | 76.8  | 1.83 |                              |
| blaCTX-M-06              | 29B | 37.78 | 84.64 | 1.71 |                              |
| blaGES                   | 29B |       |       |      | CurveFitFailed               |
| blaIMP-01                | 29B |       |       |      | LowEfficiency, CtIsSmall, S: |
| blaIMP-02                | 29B |       |       |      | LowEfficiency, CtIsSmall, S: |
| blaMOX/blaC              | 29B |       |       |      | LowEfficiency, CtIsSmall, S: |
| blaOCH                   | 29B |       |       |      | NoAmplification              |
| blaOKP                   | 29B |       |       |      | NoAmplification              |
| blaOXA1/blaC             | 29B |       |       |      | LowEfficiency, CtIsSmall, S: |
| blaOXA10-01              | 29B |       |       |      | LowEfficiency, CtIsSmall, S: |
| blaOXA10-02              | 29B | 36.47 | 78.58 | 1.93 |                              |
| blaOXY                   | 29B | 28.19 | 90.2  | 1.84 |                              |
| blaPAO                   | 29B |       |       |      | CurveFitFailed               |
| blaPER                   | 29B | 36.32 | 73.95 | 2.03 |                              |
| blaPSE                   | 29B |       |       |      | CurveFitFailed               |
| blaROB                   | 29B | 32.61 | 87.51 | 1.89 |                              |
| blaSFO                   | 29B | 32.02 | 89.21 | 1.92 | MultipleMeltPeaks            |
| blaSHV-01                | 29B | 36.76 | 90.07 | 1.61 |                              |
| blaSHV-02                | 29B | 34.76 | 87.49 | 2.02 |                              |
| blaTEM                   | 29B | 25.25 | 79.53 | 1.81 |                              |
| blaTLA                   | 29B |       |       |      | LowEfficiency, CtIsSmall, S: |
| blaVEB                   | 29B |       |       |      | LowEfficiency, CtIsSmall, S: |
| blaVIM                   | 29B | 36.32 | 87.55 | 1.87 |                              |
| blaZ                     | 29B |       |       |      | LowEfficiency, CtIsSmall, S: |
| carB                     | 29B | 30.78 | 90.43 | 1.99 |                              |
| catA1                    | 29B |       |       |      | NoAmplification              |
| catB3                    | 29B | 32.94 | 81.18 | 1.95 |                              |
| catB8                    | 29B | 30.23 | 82.29 | 1.96 |                              |

|            |     |       |       |      |                              |
|------------|-----|-------|-------|------|------------------------------|
| ceoA       | 29B | 28.98 | 91.89 | 2    |                              |
| cepA       | 29B |       |       |      | CurveFitFailed               |
| cfiA       | 29B | 34.02 | 82.33 | 1.95 | MultipleMeltPeaks            |
| cfr        | 29B |       |       |      | LowEfficiency, CtIsSmall, S: |
| cfxA       | 29B | 22.39 | 78.02 | 2.03 |                              |
| cmeA       | 29B |       |       |      | CurveFitFailed               |
| cmlA1-01   | 29B | 32.21 | 87.66 | 1.76 |                              |
| cmlA1-02   | 29B | 31.34 | 89.74 | 1.91 |                              |
| cmr        | 29B |       |       |      | NoAmplification              |
| cmx(A)     | 29B | 34.01 | 84.51 | 1.84 |                              |
| cphA-01    | 29B | 29.79 | 88.14 | 1.97 | MultipleMeltPeaks            |
| cphA-02    | 29B | 35.06 | 82.76 | 1.92 |                              |
| dfrA1      | 29B | 39.05 | 79.26 | 1.76 |                              |
| dfrA12     | 29B |       |       |      | LowEfficiency, CtIsSmall, C: |
| emrD       | 29B | 30.8  | 88.28 | 1.9  | MultipleMeltPeaks            |
| ereA       | 29B |       |       |      | CurveFitFailed               |
| ereB       | 29B | 34.54 | 85.67 | 1.96 |                              |
| erm(34)    | 29B | 34.43 | 90.34 | 1.87 |                              |
| erm(35)    | 29B |       |       |      | LowEfficiency, CtIsSmall, S: |
| erm(36)    | 29B |       |       |      | CurveFitFailed               |
| ermA       | 29B |       |       |      | CurveFitFailed               |
| ermA/ermTR | 29B |       |       |      | NoAmplification              |
| ermB       | 29B |       |       |      | LowEfficiency, CtIsSmall, S: |
| ermC       | 29B |       |       |      | LowEfficiency, CtIsSmall, S: |
| ermF       | 29B | 29.65 | 74.75 | 2.02 |                              |
| ermJ/ermD  | 29B |       |       |      | BadR2, LowEfficiency, CtIsS  |
| ermK-01    | 29B |       |       |      | CurveFitFailed               |
| ermK-02    | 29B |       |       |      | CurveFitFailed               |
| ermT-01    | 29B |       |       |      | LowEfficiency, CtIsSmall, S: |
| ermT-02    | 29B |       |       |      | CurveFitFailed               |
| ermX       | 29B |       |       |      | CurveFitFailed               |
| ermY       | 29B |       |       |      | LowEfficiency, CtIsSmall, S: |
| fabK       | 29B | 21.78 | 77.82 | 2.18 |                              |
| floR       | 29B | 34.02 | 83.66 | 1.91 | MultipleMeltPeaks            |
| folA       | 29B |       |       |      | NoAmplification              |
| fosB       | 29B |       |       |      | LowEfficiency, CtIsSmall, S: |
| fosX       | 29B |       |       |      | LowEfficiency, CtIsSmall, S: |
| fox5       | 29B | 29.21 | 86.67 | 1.97 | MultipleMeltPeaks            |
| imiR       | 29B |       |       |      | CurveFitFailed               |
| lmrA-01    | 29B | 35.99 | 82.51 | 1.85 |                              |
| intl       | 29B | 29.79 | 84.79 | 1.97 |                              |
| intl1      | 29B | 20.34 | 88.26 | 1.96 |                              |
| IS613      | 29B | 22.1  | 79.67 | 2.15 |                              |
| lnuA-01    | 29B |       |       |      | CurveFitFailed               |
| lnuB-01    | 29B |       |       |      | LowEfficiency, CtIsSmall, S: |
| lnuB-02    | 29B |       |       |      | LowEfficiency, CtIsSmall, S: |

|                |     |       |       |                              |
|----------------|-----|-------|-------|------------------------------|
| lnuC           | 29B | 34.44 | 87.78 | 1.81 MultipleMeltPeaks       |
| marR-01        | 29B | 33.69 | 81.07 | 1.94 MultipleMeltPeaks       |
| matA/mel       | 29B | 16.11 | 77.62 | 2.15                         |
| mdetI1         | 29B |       |       | LowEfficiency, CtIsSmall, S: |
| mdtA           | 29B | 35.39 | 87.99 | 1.89 MultipleMeltPeaks       |
| mdtE/yhiU      | 29B | 28.96 | 91.26 | 1.93 MultipleMeltPeaks       |
| mecA           | 29B |       |       | LowEfficiency, CtIsSmall, S: |
| mefA           | 29B | 15.28 | 80.48 | 2.12                         |
| mepA           | 29B | 27.64 | 89.43 | 1.98                         |
| mexA           | 29B | 33.46 | 89.72 | 1.92                         |
| mexD           | 29B | 32.24 | 80.4  | 2.08                         |
| mexE           | 29B | 36.4  | 89.18 | 1.81 MultipleMeltPeaks       |
| mexF           | 29B | 27.38 | 85.66 | 1.89 MultipleMeltPeaks       |
| mphA-01        | 29B | 28.12 | 90.31 | 1.93 MultipleMeltPeaks       |
| mphA-02        | 29B | 28.92 | 89.36 | 2 MultipleMeltPeaks          |
| mphB           | 29B | 34.01 | 78.11 | 1.9 MultipleMeltPeaks        |
| mphC           | 29B |       |       | CurveFitFailed               |
| msrA-01        | 29B |       |       | CurveFitFailed               |
| msrC-01        | 29B |       |       | NoAmplification              |
| mtrC-01        | 29B | 35.54 | 78.81 | 1.85 MultipleMeltPeaks       |
| mtrC-02        | 29B | 31.83 | 84.37 | 1.64                         |
| mtrD-02        | 29B | 27.52 | 82.06 | 1.94                         |
| mtrD-03        | 29B | 36.15 | 79.91 | 1.83 MultipleMeltPeaks       |
| NDM1           | 29B | 37.87 | 77.56 | 1.86                         |
| nimE           | 29B |       |       | CurveFitFailed               |
| nisB           | 29B |       |       | CurveFitFailed               |
| oleC           | 29B | 29.02 | 89.06 | 1.89                         |
| oprD           | 29B | 29.16 | 86.85 | 1.92 MultipleMeltPeaks       |
| oprJ           | 29B | 29.32 | 91.67 | 2.02                         |
| pbp            | 29B |       |       | CurveFitFailed               |
| pbp2x          | 29B | 22.88 | 75.71 | 2.11                         |
| Pbp5           | 29B |       |       | LowEfficiency, CtIsSmall, S: |
| penA           | 29B | 33.93 | 83.87 | 1.79 MultipleMeltPeaks       |
| pikR1          | 29B | 32.81 | 91.46 | 2.02                         |
| pikR2          | 29B | 32.17 | 89.56 | 1.98                         |
| pmrA           | 29B | 20.89 | 79.72 | 2.11                         |
| pncA           | 29B | 29.95 | 90.71 | 1.97                         |
| putative multi | 29B | 36.98 | 77.52 | 1.85 MultipleMeltPeaks       |
| qac            | 29B |       |       | LowEfficiency, CtIsSmall, S: |
| qacA           | 29B | 35.03 | 79.9  | 1.85 MultipleMeltPeaks       |
| qacA/qacB      | 29B |       |       | LowEfficiency, CtIsSmall, S: |
| qacEdelta1-0   | 29B |       |       | CurveFitFailed               |
| qacEdelta1-0   | 29B | 32.41 | 76.18 | 1.9 MultipleMeltPeaks        |
| qacH-01        | 29B | 33.9  | 88.71 | 1.94                         |
| qacH-02        | 29B | 37.25 | 83.85 | 1.62                         |
| qnrA           | 29B | 40    | 73.43 | 1.8 MultipleMeltPeaks        |



|              |     |       |       |      |                              |
|--------------|-----|-------|-------|------|------------------------------|
| rarD-02      | 29B | 37.61 | 84.21 | 1.75 |                              |
| sat4         | 29B |       |       |      | LowEfficiency, CtIsSmall, S: |
| sdeB         | 29B |       |       |      | LowEfficiency, CtIsSmall, S: |
| spcN-01      | 29B | 36.64 | 86.04 | 1.89 |                              |
| speA         | 29B |       |       |      | CurveFitFailed               |
| str          | 29B |       |       |      | LowEfficiency, CtIsSmall, S: |
| strA         | 29B |       |       |      | LowEfficiency, CtIsSmall, S: |
| strB         | 29B | 27.17 | 84.14 | 1.92 |                              |
| sul1         | 29B | 36.59 | 88.6  | 1.67 |                              |
| sul2         | 29B | 34.81 | 89.29 | 2.07 |                              |
| sulA/foIP-01 | 29B | 24.18 | 81.34 | 1.89 |                              |
| sulA/foIP-03 | 29B | 20.39 | 83.64 | 2.05 |                              |
| tet(32)      | 29B | 28.85 | 81.07 | 2    |                              |
| tet(34)      | 29B | 30.96 | 75.82 | 2.06 |                              |
| tet(35)      | 29B |       |       |      | LowEfficiency, CtIsSmall, Ci |
| tet(36)-A    | 29B | 35.37 | 81.89 | 1.84 |                              |
| tet(36)-B    | 29B |       |       |      | LowEfficiency, CtIsSmall, S: |
| tet(37)      | 29B | 23.49 | 76.38 | 1.98 |                              |
| tetA-01      | 29B | 37.29 | 88.71 | 1.71 | MultipleMeltPeaks            |
| tetA-02      | 29B | 33.63 | 91.08 | 1.86 |                              |
| tetB-01      | 29B | 26.62 | 79.73 | 1.96 | MultipleMeltPeaks            |
| tetB-02      | 29B | 26.58 | 79.95 | 2    |                              |
| tetC-01      | 29B | 27.35 | 75.25 | 1.94 |                              |
| tetC-02      | 29B | 26.92 | 76.15 | 2.05 |                              |
| tetD-01      | 29B |       |       |      | LowEfficiency, CtIsSmall, S: |
| tetD-02      | 29B | 33.38 | 85.77 | 2.01 | MultipleMeltPeaks            |
| tetE         | 29B |       |       |      | CurveFitFailed               |
| tetG-01      | 29B | 32.98 | 89.58 | 1.98 | MultipleMeltPeaks            |
| tetG-02      | 29B | 29.96 | 89.25 | 2.01 | MultipleMeltPeaks            |
| tetH         | 29B |       |       |      | LowEfficiency, CtIsSmall, Ci |
| tetJ         | 29B |       |       |      | LowEfficiency, CtIsSmall, S: |
| tetK         | 29B |       |       |      | CurveFitFailed               |
| tetL-01      | 29B |       |       |      | LowEfficiency, CtIsSmall, Ci |
| tetL-02      | 29B |       |       |      | CurveFitFailed               |
| tetM-01      | 29B | 20.69 | 75.86 | 2.03 |                              |
| tetM-02      | 29B | 21.25 | 77.94 | 2.03 |                              |
| tetO-01      | 29B | 28.3  | 77.19 | 2.05 |                              |
| tetPA        | 29B |       |       |      | CurveFitFailed               |
| tetPB-01     | 29B | 35.9  | 80.27 | 1.93 | MultipleMeltPeaks            |
| tetPB-02     | 29B | 32.07 | 85.11 | 2.01 |                              |
| tetPB-03     | 29B |       |       |      | LowEfficiency, CtIsSmall, S: |
| tetPB-05     | 29B |       |       |      | CurveFitFailed               |
| tetQ         | 29B | 24.33 | 76.74 | 2.05 |                              |
| tetR-02      | 29B | 28.53 | 90.67 | 1.9  |                              |
| tetR-03      | 29B | 25.94 | 76.17 | 2.01 |                              |
| tetS         | 29B | 33.36 | 88.56 | 2.19 |                              |

|             |     |       |       |      |                              |
|-------------|-----|-------|-------|------|------------------------------|
| tetT        | 29B |       |       |      | LowEfficiency, CtIsSmall, S: |
| tetU-01     | 29B |       |       |      | LowEfficiency, CtIsSmall, S: |
| tetV        | 29B |       |       |      | CurveFitFailed               |
| tetW-01     | 29B | 37.58 | 78.12 | 1.81 |                              |
| tetX        | 29B |       |       |      | BadR2, CtIsSmall, Saturatio  |
| tnpA-01     | 29B |       |       |      | LowEfficiency, CtIsSmall, S: |
| tnpA-02     | 29B | 28.51 | 85.17 | 1.83 |                              |
| tnpA-03     | 29B | 15.47 | 78.44 | 2.11 |                              |
| tnpA-04     | 29B | 37.99 | 78.49 | 1.76 | MultipleMeltPeaks            |
| tnpA-05     | 29B | 27.65 | 81.08 | 1.91 |                              |
| tnpA-07     | 29B |       |       |      | LowEfficiency, CtIsSmall, S: |
| tolC-01     | 29B | 32.42 | 81.09 | 1.89 |                              |
| tolC-02     | 29B | 28.75 | 85.13 | 1.96 | MultipleMeltPeaks            |
| tolC-03     | 29B | 29.85 | 85.6  | 1.97 | MultipleMeltPeaks            |
| Tp614       | 29B | 29.26 | 78.51 | 2    |                              |
| ttgA        | 29B | 33.7  | 84.26 | 1.94 |                              |
| ttgB        | 29B | 35.39 | 84.88 | 1.93 | MultipleMeltPeaks            |
| vanA        | 29B |       |       |      | LowEfficiency, CtIsSmall, Ci |
| vanB-01     | 29B | 31.13 | 86.66 | 1.97 | MultipleMeltPeaks            |
| vanC-01     | 29B | 38.09 | 72.74 | 1.93 |                              |
| vanC-02     | 29B |       |       |      | LowEfficiency, CtIsSmall, S: |
| vanC-03     | 29B | 26.53 | 91.66 | 2.02 |                              |
| vanC1       | 29B |       |       |      | CurveFitFailed               |
| vanC2/vanC3 | 29B | 32.81 | 85.23 | 2.01 |                              |
| vanG        | 29B |       |       |      | BadR2, CtIsSmall, Saturatio  |
| vanHB       | 29B | 34.32 | 89.84 | 1.9  |                              |
| vanHD       | 29B |       |       |      | CurveFitFailed               |
| vanRA-01    | 29B |       |       |      | LowEfficiency, CtIsSmall, S: |
| vanRA-02    | 29B |       |       |      | CurveFitFailed               |
| vanRB       | 29B | 32.56 | 75.55 | 2.34 | MultipleMeltPeaks            |
| vanRC       | 29B |       |       |      | LowEfficiency, CtIsSmall, S: |
| vanRC4      | 29B |       |       |      | CurveFitFailed               |
| vanRD       | 29B |       |       |      | CurveFitFailed               |
| vanSA       | 29B |       |       |      | CurveFitFailed               |
| vanSB       | 29B | 29.91 | 74.83 | 2.08 |                              |
| vanSC-01    | 29B | 33.59 | 77.83 | 2.13 |                              |
| vanSC-02    | 29B |       |       |      | NoAmplification              |
| vanTC-01    | 29B |       |       |      | LowEfficiency, CtIsSmall, S: |
| vanTC-02    | 29B | 29.67 | 89.12 | 1.94 |                              |
| vanTE       | 29B |       |       |      | LowEfficiency, CtIsSmall, S: |
| vanTG       | 29B |       |       |      | LowEfficiency, CtIsSmall, S: |
| vanWB       | 29B |       |       |      | LowEfficiency, CtIsSmall, S: |
| vanWG       | 29B |       |       |      | CurveFitFailed               |
| vanXA       | 29B |       |       |      | LowEfficiency, CtIsSmall, S: |
| vanXB       | 29B |       |       |      | NoAmplification              |
| vanXD       | 29B | 31.54 | 75.4  | 2.08 |                              |

|              |     |       |       |      |                              |
|--------------|-----|-------|-------|------|------------------------------|
| vanYB        | 29B | 37.03 | 85.77 | 1.91 |                              |
| vanYD-01     | 29B | 31.81 | 83.09 | 1.83 |                              |
| vanYD-02     | 29B |       |       |      | LowEfficiency, CtIsSmall, S: |
| vatB-01      | 29B |       |       |      | LowEfficiency, CtIsSmall, Ci |
| vatB-02      | 29B | 34.49 | 79.03 | 2.1  |                              |
| vatC-01      | 29B | 35.26 | 81.33 | 1.93 |                              |
| vatC-02      | 29B | 35.78 | 74.39 | 1.92 | MultipleMeltPeaks            |
| vatE-01      | 29B | 30.84 | 74.48 | 2.06 |                              |
| vatE-02      | 29B |       |       |      | CurveFitFailed               |
| vgaA-01      | 29B |       |       |      | CurveFitFailed               |
| vgaA-02      | 29B |       |       |      | CurveFitFailed               |
| vgb-01       | 29B | 38.83 | 75.04 | 1.8  | MultipleMeltPeaks            |
| vgbB-01      | 29B |       |       |      | CurveFitFailed               |
| vgbB-02      | 29B |       |       |      | LowEfficiency, CtIsSmall, S: |
| yceE/mdtG-0  | 29B |       |       |      | CurveFitFailed               |
| yceE/mdtG-0  | 29B |       |       |      | CurveFitFailed               |
| yceL/mdtH-0  | 29B | 27.32 | 84.31 | 1.95 |                              |
| yceL/mdtH-0  | 29B |       |       |      | LowEfficiency, CtIsSmall, S: |
| yceL/mdtH-0  | 29B | 32.84 | 90.04 | 1.98 | MultipleMeltPeaks            |
| yidY/mdtL-01 | 29B | 29.86 | 84.84 | 2.01 |                              |
| yidY/mdtL-02 | 29B | 31.6  | 93.06 | 1.97 |                              |































| Assay          | Sample | Ct | Tm    | Efficiency | flag                         |
|----------------|--------|----|-------|------------|------------------------------|
| 16S rRNA       | 29C    |    | 17.08 | 82.25      | 2.06                         |
| aac            | 29C    |    | 28.86 | 86.69      | 1.55 MultipleMeltPeaks       |
| aac(6')-Ib(akz | 29C    |    |       |            | LowEfficiency, CtIsSmall, S: |
| aac(6')-Ib(akz | 29C    |    | 31.43 | 81.89      | 1.96 MultipleMeltPeaks       |
| aac(6')-Ib(akz | 29C    |    | 32.25 | 87.62      | 1.73 MultipleMeltPeaks       |
| aac(6')-II     | 29C    |    | 36.66 | 79         | 1.74 MultipleMeltPeaks       |
| aac(6')I1      | 29C    |    | 34.29 | 91.95      | 1.91 MultipleMeltPeaks       |
| aacA/aphD      | 29C    |    |       |            | CurveFitFailed               |
| aacC           | 29C    |    | 29.55 | 87.22      | 1.95 MultipleMeltPeaks       |
| aacC1          | 29C    |    | 37.13 | 90.29      | 1.81                         |
| aacC2          | 29C    |    |       |            | NoAmplification              |
| aacC4          | 29C    |    | 30.03 | 89.15      | 1.93                         |
| aadA-01        | 29C    |    |       |            | LowEfficiency, CtIsSmall, Ci |
| aadA-02        | 29C    |    |       |            | LowEfficiency, CtIsSmall, S: |
| aadA-1-01      | 29C    |    | 32.75 | 82.04      | 1.93                         |
| aadA-1-02      | 29C    |    |       |            | LowEfficiency, CtIsSmall, S: |
| aadA1          | 29C    |    | 32.47 | 84.14      | 2.02                         |
| aadA2-01       | 29C    |    | 39.77 | 82.27      | 1.69                         |
| aadA2-02       | 29C    |    | 32.65 | 75.29      | 1.99 MultipleMeltPeaks       |
| aadA2-03       | 29C    |    | 40.55 | 89.54      | 1.73 MultipleMeltPeaks       |
| aadA5-01       | 29C    |    | 35.58 | 81.47      | 1.93                         |
| aadA5-02       | 29C    |    | 35.77 | 78.09      | 1.94                         |
| aadA9-01       | 29C    |    | 33.56 | 79.94      | 1.92 MultipleMeltPeaks       |
| aadA9-02       | 29C    |    |       |            | CurveFitFailed               |
| aadD           | 29C    |    |       |            | CurveFitFailed               |
| aadE           | 29C    |    |       |            | LowEfficiency, CtIsSmall, Ci |
| acrA-01        | 29C    |    | 30.98 | 89.06      | 2.02                         |
| acrA-02        | 29C    |    | 31.58 | 90.74      | 1.96                         |
| acrA-03        | 29C    |    | 34.94 | 90.3       | 1.86                         |
| acrA-04        | 29C    |    | 30.52 | 80.86      | 1.99                         |
| acrA-05        | 29C    |    | 28.97 | 90.25      | 1.97                         |
| acrB-01        | 29C    |    | 31.25 | 90.01      | 1.85                         |
| acrF           | 29C    |    | 29.81 | 85         | 1.98                         |
| acrR-01        | 29C    |    | 32.93 | 89.48      | 1.97 MultipleMeltPeaks       |
| acrR-02        | 29C    |    | 30.73 | 86         | 1.93                         |
| Actin          | 29C    |    | 21.95 | 87.23      | 1.97                         |
| adeA           | 29C    |    | 35.08 | 82.27      | 1.88 MultipleMeltPeaks       |
| ampC-01        | 29C    |    | 29.95 | 85.2       | 1.97                         |
| ampC-02        | 29C    |    | 34.87 | 88.62      | 1.9                          |
| ampC-04        | 29C    |    | 33.22 | 78.47      | 1.91                         |
| ampC-05        | 29C    |    |       |            | NoAmplification              |
| ampC-06        | 29C    |    | 41.65 | 62.35      | 1.7 MultipleMeltPeaks        |
| ampC-07        | 29C    |    | 34.3  | 88.41      | 1.85                         |
| ampC-09        | 29C    |    | 38.09 | 90.61      | 1.63                         |
| ampC/blaDH     | 29C    |    | 28.79 | 85.16      | 1.97                         |

|                            |     |       |       |      |                                          |
|----------------------------|-----|-------|-------|------|------------------------------------------|
| aph                        | 29C |       |       |      | LowEfficiency, CtIsSmall, Ci             |
| aph(2')-Id-01              | 29C |       |       |      | LowEfficiency, CtIsSmall, Ci             |
| aph(2')-Id-02              | 29C |       |       |      | LowEfficiency, CtIsSmall, Ci             |
| aph6ia                     | 29C | 33.26 | 78.76 | 1.95 |                                          |
| aphA1(aka k <sub>z</sub> ) | 29C |       |       |      | CurveFitFailed                           |
| bacA-01                    | 29C | 38.44 | 61.81 | 1.65 | MultipleMeltPeaks                        |
| bacA-02                    | 29C |       |       |      | LowEfficiency, CtIsSmall, S <sub>c</sub> |
| BETA-globin                | 29C | 22.04 | 84.3  | 2.05 |                                          |
| bla-ACC-1                  | 29C | 37.72 | 83.7  | 1.76 | MultipleMeltPeaks                        |
| bla-L1                     | 29C | 28.15 | 87.94 | 1.99 | MultipleMeltPeaks                        |
| bla1                       | 29C |       |       |      | LowEfficiency, CtIsSmall, Ci             |
| blaCMY                     | 29C |       |       |      | BadR2, LowEfficiency, CtIsS              |
| blaCMY2-01                 | 29C | 38.88 | 82.51 | 1.75 | MultipleMeltPeaks                        |
| blaCMY2-02                 | 29C | 28.49 | 85.64 | 2    | MultipleMeltPeaks                        |
| blaCTX-M-01                | 29C | 38.03 | 76.25 | 1.77 | MultipleMeltPeaks                        |
| blaCTX-M-02                | 29C | 34.73 | 90.61 | 1.86 | MultipleMeltPeaks                        |
| blaCTX-M-03                | 29C |       |       |      | LowEfficiency, CtIsSmall, Ci             |
| blaCTX-M-04                | 29C | 32.89 | 86.33 | 1.96 |                                          |
| blaCTX-M-05                | 29C | 33.95 | 76.81 | 1.8  |                                          |
| blaCTX-M-06                | 29C | 37.2  | 86.73 | 1.77 | MultipleMeltPeaks                        |
| blaGES                     | 29C |       |       |      | LowEfficiency, CtIsSmall, Ci             |
| blaIMP-01                  | 29C |       |       |      | NoAmplification                          |
| blaIMP-02                  | 29C | 37.7  | 78.32 | 1.82 | MultipleMeltPeaks                        |
| blaMOX/blaC                | 29C | 36.11 | 90.01 | 1.79 | MultipleMeltPeaks                        |
| blaOCH                     | 29C |       |       |      | NoAmplification                          |
| blaOKP                     | 29C |       |       |      | NoAmplification                          |
| blaOXA1/blaC               | 29C |       |       |      | LowEfficiency, CtIsSmall, S <sub>c</sub> |
| blaOXA10-01                | 29C |       |       |      | CurveFitFailed                           |
| blaOXA10-02                | 29C |       |       |      | LowEfficiency, CtIsSmall, S <sub>c</sub> |
| blaOXY                     | 29C | 31.78 | 89.73 | 1.84 |                                          |
| blaPAO                     | 29C |       |       |      | BadR2, LowEfficiency, CtIsS              |
| blaPER                     | 29C |       |       |      | LowEfficiency, CtIsSmall, Ci             |
| blaPSE                     | 29C |       |       |      | LowEfficiency, CtIsSmall, Ci             |
| blaROB                     | 29C |       |       |      | NoAmplification                          |
| blaSFO                     | 29C | 31.46 | 90.22 | 1.97 | MultipleMeltPeaks                        |
| blaSHV-01                  | 29C | 38.5  | 83.08 | 1.66 | MultipleMeltPeaks                        |
| blaSHV-02                  | 29C |       |       |      | CurveFitFailed                           |
| blaTEM                     | 29C | 37.09 | 62.25 | 1.88 | MultipleMeltPeaks                        |
| blaTLA                     | 29C |       |       |      | LowEfficiency, CtIsSmall, Ci             |
| blaVEB                     | 29C |       |       |      | LowEfficiency, CtIsSmall, Ci             |
| blaVIM                     | 29C | 36.1  | 88.76 | 1.9  |                                          |
| blaZ                       | 29C |       |       |      | LowEfficiency, CtIsSmall, Ci             |
| carB                       | 29C | 32.81 | 87.88 | 1.9  |                                          |
| catA1                      | 29C |       |       |      | NoAmplification                          |
| catB3                      | 29C | 35.97 | 79.83 | 1.81 | MultipleMeltPeaks                        |
| catB8                      | 29C | 29.39 | 81.71 | 2    | MultipleMeltPeaks                        |

|            |     |       |       |      |                                          |
|------------|-----|-------|-------|------|------------------------------------------|
| ceoA       | 29C | 27.83 | 85.66 | 2    | MultipleMeltPeaks                        |
| cepA       | 29C |       |       |      | LowEfficiency, CtIsSmall, S <sub>c</sub> |
| cfiA       | 29C | 31.21 | 83.86 | 1.86 | MultipleMeltPeaks                        |
| cfr        | 29C |       |       |      | CurveFitFailed                           |
| cfxA       | 29C | 24.98 | 77.97 | 2.08 |                                          |
| cmeA       | 29C |       |       |      | LowEfficiency, CtIsSmall, S <sub>c</sub> |
| cmlA1-01   | 29C | 36.94 | 80.14 | 1.83 | MultipleMeltPeaks                        |
| cmlA1-02   | 29C | 36.75 | 87.67 | 1.77 |                                          |
| cmr        | 29C |       |       |      | LowEfficiency, CtIsSmall, S <sub>c</sub> |
| cmx(A)     | 29C | 28.37 | 84.91 | 1.9  |                                          |
| cphA-01    | 29C | 31.87 | 85.69 | 1.92 | MultipleMeltPeaks                        |
| cphA-02    | 29C | 34.89 | 82.34 | 1.95 |                                          |
| dfrA1      | 29C | 40.28 | 61.74 | 1.67 | MultipleMeltPeaks                        |
| dfrA12     | 29C | 39.06 | 83.6  | 1.6  | MultipleMeltPeaks                        |
| emrD       | 29C | 30.88 | 86.85 | 1.97 |                                          |
| ereA       | 29C | 35.07 | 82.7  | 1.94 |                                          |
| ereB       | 29C | 36.94 | 87.95 | 1.77 |                                          |
| erm(34)    | 29C | 36.98 | 82.81 | 1.83 |                                          |
| erm(35)    | 29C |       |       |      | NoAmplification                          |
| erm(36)    | 29C | 36.06 | 86.05 | 1.85 |                                          |
| ermA       | 29C |       |       |      | LowEfficiency, CtIsSmall, C <sub>i</sub> |
| ermA/ermTR | 29C |       |       |      | NoAmplification                          |
| ermB       | 29C | 25.34 | 74.92 | 1.96 |                                          |
| ermC       | 29C |       |       |      | LowEfficiency, CtIsSmall, C <sub>i</sub> |
| ermF       | 29C |       |       |      | LowEfficiency, CtIsSmall, S <sub>c</sub> |
| ermJ/ermD  | 29C |       |       |      | LowEfficiency, CtIsSmall, C <sub>i</sub> |
| ermK-01    | 29C | 33.72 | 81.97 | 1.97 |                                          |
| ermK-02    | 29C | 35.54 | 76.44 | 1.85 | MultipleMeltPeaks                        |
| ermT-01    | 29C |       |       |      | LowEfficiency, CtIsSmall, S <sub>c</sub> |
| ermT-02    | 29C |       |       |      | LowEfficiency, CtIsSmall, S <sub>c</sub> |
| ermX       | 29C | 35.47 | 87.93 | 1.78 |                                          |
| ermY       | 29C |       |       |      | LowEfficiency, CtIsSmall, S <sub>c</sub> |
| fabK       | 29C | 25.02 | 79.84 | 2.15 |                                          |
| floR       | 29C |       |       |      | NoAmplification                          |
| folA       | 29C |       |       |      | NoAmplification                          |
| fosB       | 29C |       |       |      | CurveFitFailed                           |
| fosX       | 29C |       |       |      | LowEfficiency, CtIsSmall, C <sub>i</sub> |
| fox5       | 29C | 27.17 | 86.87 | 1.98 |                                          |
| imiR       | 29C |       |       |      | LowEfficiency, CtIsSmall, S <sub>c</sub> |
| ImrA-01    | 29C | 36.43 | 82.77 | 1.91 |                                          |
| intl       | 29C | 26.99 | 84.67 | 1.99 | MultipleMeltPeaks                        |
| intl1      | 29C | 19.15 | 87.3  | 2.01 |                                          |
| IS613      | 29C | 24.7  | 79.63 | 2.07 |                                          |
| lnuA-01    | 29C |       |       |      | LowEfficiency, CtIsSmall, S <sub>c</sub> |
| lnuB-01    | 29C |       |       |      | CurveFitFailed                           |
| lnuB-02    | 29C |       |       |      | LowEfficiency, CtIsSmall, C <sub>i</sub> |

|                |     |       |       |      |                              |
|----------------|-----|-------|-------|------|------------------------------|
| lucC           | 29C | 29.96 | 87.18 | 1.88 |                              |
| marR-01        | 29C | 34.87 | 85.49 | 1.89 |                              |
| matA/mel       | 29C | 19.81 | 77.65 | 2.09 |                              |
| mdet1          | 29C |       |       |      | LowEfficiency, CtIsSmall, Ci |
| mdtA           | 29C | 34.47 | 83.01 | 1.83 |                              |
| mdtE/yhiU      | 29C | 28.53 | 87.63 | 1.95 |                              |
| mecA           | 29C |       |       |      | LowEfficiency, CtIsSmall, Ci |
| mefA           | 29C | 19.02 | 80.45 | 2.04 |                              |
| mepA           | 29C | 33.25 | 85.35 | 1.94 |                              |
| mexA           | 29C | 33.47 | 78.59 | 1.91 | MultipleMeltPeaks            |
| mexD           | 29C | 32.59 | 80.34 | 2.05 |                              |
| mexE           | 29C | 30.76 | 89.89 | 1.9  |                              |
| mexF           | 29C | 28.58 | 84.52 | 2    | MultipleMeltPeaks            |
| mphA-01        | 29C | 29.72 | 87.15 | 2.02 | MultipleMeltPeaks            |
| mphA-02        | 29C | 27.9  | 87.87 | 1.89 |                              |
| mphB           | 29C | 32.44 | 85.06 | 2.04 |                              |
| mphC           | 29C | 39.78 | 73.94 | 1.75 |                              |
| msrA-01        | 29C |       |       |      | CurveFitFailed               |
| msrC-01        | 29C |       |       |      | NoAmplification              |
| mtrC-01        | 29C | 35.67 | 88.13 | 1.79 |                              |
| mtrC-02        | 29C | 39.02 | 64.37 | 1.75 | MultipleMeltPeaks            |
| mtrD-02        | 29C | 28.47 | 81.07 | 1.89 |                              |
| mtrD-03        | 29C | 37.4  | 81.11 | 1.69 |                              |
| NDM1           | 29C |       |       |      | LowEfficiency, CtIsSmall, S: |
| nimE           | 29C |       |       |      | LowEfficiency, CtIsSmall, Ci |
| nisB           | 29C | 29.21 | 77.58 | 2.01 |                              |
| oleC           | 29C | 34.83 | 87.98 | 1.85 |                              |
| oprD           | 29C | 26.73 | 91.96 | 1.83 |                              |
| oprJ           | 29C | 31.24 | 91.47 | 1.76 |                              |
| pbp            | 29C |       |       |      | LowEfficiency, CtIsSmall, S: |
| pbp2x          | 29C |       |       |      | LowEfficiency, CtIsSmall, Ci |
| Pbp5           | 29C |       |       |      | CurveFitFailed               |
| penA           | 29C | 35.6  | 86.91 | 1.76 | MultipleMeltPeaks            |
| pikR1          | 29C | 34.11 | 84.05 | 1.92 | MultipleMeltPeaks            |
| pikR2          | 29C | 28.68 | 85.7  | 2.02 |                              |
| pmrA           | 29C | 24.06 | 79.98 | 2.12 |                              |
| pncA           | 29C | 28.95 | 90.72 | 1.97 |                              |
| putative multi | 29C | 33.62 | 84.74 | 1.98 |                              |
| qac            | 29C | 36.02 | 85.38 | 1.88 | MultipleMeltPeaks            |
| qacA           | 29C |       |       |      | LowEfficiency, CtIsSmall, S: |
| qacA/qacB      | 29C | 38.13 | 85.13 | 1.5  | MultipleMeltPeaks            |
| qacEdelta1-0   | 29C |       |       |      | LowEfficiency, CtIsSmall, S: |
| qacEdelta1-0   | 29C | 34.11 | 87.02 | 1.97 |                              |
| qacH-01        | 29C | 35.08 | 86.12 | 1.93 |                              |
| qacH-02        | 29C | 31.05 | 83.74 | 1.86 | MultipleMeltPeaks            |
| qnrA           | 29C | 39.18 | 79.87 | 1.75 |                              |

|              |     |       |       |      |                              |
|--------------|-----|-------|-------|------|------------------------------|
| rarD-02      | 29C | 37    | 64.23 | 1.95 | MultipleMeltPeaks            |
| sat4         | 29C |       |       |      | LowEfficiency, CtIsSmall, Ci |
| sdeB         | 29C |       |       |      | CurveFitFailed               |
| spcN-01      | 29C | 36.53 | 86.08 | 1.84 |                              |
| speA         | 29C |       |       |      | NoAmplification              |
| str          | 29C |       |       |      | LowEfficiency, CtIsSmall, Ci |
| strA         | 29C |       |       |      | LowEfficiency, CtIsSmall, Ci |
| strB         | 29C | 38.87 | 81.42 | 1.76 | MultipleMeltPeaks            |
| sul1         | 29C | 37.42 | 90.27 | 1.72 | MultipleMeltPeaks            |
| sul2         | 29C |       |       |      | CurveFitFailed               |
| sulA/foIP-01 | 29C | 22.43 | 81.2  | 2.06 |                              |
| sulA/foIP-03 | 29C | 22.54 | 83.71 | 2.04 |                              |
| tet(32)      | 29C |       |       |      | CurveFitFailed               |
| tet(34)      | 29C | 31.2  | 75.64 | 2.05 |                              |
| tet(35)      | 29C |       |       |      | NoAmplification              |
| tet(36)-A    | 29C | 32    | 83.13 | 1.98 |                              |
| tet(36)-B    | 29C |       |       |      | CurveFitFailed               |
| tet(37)      | 29C | 27.19 | 77.82 | 1.99 | MultipleMeltPeaks            |
| tetA-01      | 29C | 29.58 | 84.86 | 1.95 |                              |
| tetA-02      | 29C | 34.28 | 80.01 | 1.89 | MultipleMeltPeaks            |
| tetB-01      | 29C | 28.63 | 86.52 | 1.97 |                              |
| tetB-02      | 29C | 29.22 | 79.75 | 2    |                              |
| tetC-01      | 29C | 30.04 | 75.15 | 2.03 |                              |
| tetC-02      | 29C |       |       |      | LowEfficiency, CtIsSmall, Ci |
| tetD-01      | 29C |       |       |      | LowEfficiency, CtIsSmall, Ci |
| tetD-02      | 29C | 34.74 | 92.72 | 1.85 | MultipleMeltPeaks            |
| tetE         | 29C |       |       |      | LowEfficiency, CtIsSmall, Ci |
| tetG-01      | 29C | 32.48 | 82.26 | 1.99 | MultipleMeltPeaks            |
| tetG-02      | 29C | 29.07 | 81.12 | 1.99 | MultipleMeltPeaks            |
| tetH         | 29C |       |       |      | NoAmplification              |
| tetJ         | 29C |       |       |      | LowEfficiency, CtIsSmall, Ci |
| tetK         | 29C |       |       |      | LowEfficiency, CtIsSmall, Ci |
| tetL-01      | 29C |       |       |      | LowEfficiency, CtIsSmall, S: |
| tetL-02      | 29C |       |       |      | CurveFitFailed               |
| tetM-01      | 29C | 24.89 | 75.89 | 2.02 |                              |
| tetM-02      | 29C | 25.3  | 78.13 | 2.02 |                              |
| tetO-01      | 29C |       |       |      | LowEfficiency, CtIsSmall, S: |
| tetPA        | 29C |       |       |      | NoAmplification              |
| tetPB-01     | 29C |       |       |      | BadR2, LowEfficiency, CtIsS  |
| tetPB-02     | 29C | 29.62 | 85.26 | 2.12 |                              |
| tetPB-03     | 29C |       |       |      | LowEfficiency, CtIsSmall, S: |
| tetPB-05     | 29C |       |       |      | LowEfficiency, CtIsSmall, S: |
| tetQ         | 29C | 25.91 | 75.9  | 2.02 |                              |
| tetR-02      | 29C | 29.9  | 87.79 | 1.99 |                              |
| tetR-03      | 29C | 28.3  | 75.98 | 1.98 |                              |
| tetS         | 29C | 31.35 | 79.44 | 1.82 |                              |

|             |     |       |       |      |                              |
|-------------|-----|-------|-------|------|------------------------------|
| tetT        | 29C |       |       |      | LowEfficiency, CtIsSmall, Ci |
| tetU-01     | 29C |       |       |      | CurveFitFailed               |
| tetV        | 29C |       |       |      | LowEfficiency, CtIsSmall, S: |
| tetW-01     | 29C |       |       |      | LowEfficiency, CtIsSmall, S: |
| tetX        | 29C |       |       |      | BadR2, CtIsSmall, Saturatio  |
| tnpA-01     | 29C | 37.3  | 86.87 | 1.91 | MultipleMeltPeaks            |
| tnpA-02     | 29C | 33.42 | 85.1  | 1.84 | MultipleMeltPeaks            |
| tnpA-03     | 29C | 19.23 | 78.33 | 2.12 |                              |
| tnpA-04     | 29C | 35.51 | 78.58 | 1.89 |                              |
| tnpA-05     | 29C |       |       |      | LowEfficiency, CtIsSmall, Ci |
| tnpA-07     | 29C |       |       |      | LowEfficiency, CtIsSmall, Ci |
| tolC-01     | 29C |       |       |      | CurveFitFailed               |
| tolC-02     | 29C | 27.7  | 87.58 | 1.94 | MultipleMeltPeaks            |
| tolC-03     | 29C | 29.08 | 85.42 | 1.96 |                              |
| Tp614       | 29C | 32.52 | 81.12 | 1.98 |                              |
| ttgA        | 29C | 38.08 | 83.73 | 1.86 | MultipleMeltPeaks            |
| ttgB        | 29C | 32.46 | 84.29 | 2.06 | MultipleMeltPeaks            |
| vanA        | 29C |       |       |      | NoAmplification              |
| vanB-01     | 29C | 31.71 | 79.48 | 1.9  | MultipleMeltPeaks            |
| vanC-01     | 29C |       |       |      | LowEfficiency, CtIsSmall, Ci |
| vanC-02     | 29C |       |       |      | LowEfficiency, CtIsSmall, Ci |
| vanC-03     | 29C | 25.75 | 86.37 | 1.95 |                              |
| vanC1       | 29C |       |       |      | LowEfficiency, CtIsSmall, Ci |
| vanC2/vanC3 | 29C | 32.63 | 83.1  | 2    | MultipleMeltPeaks            |
| vanG        | 29C |       |       |      | BadR2, CtIsSmall, Saturatio  |
| vanHB       | 29C | 31.65 | 90.08 | 1.95 |                              |
| vanHD       | 29C | 35.87 | 88.5  | 1.79 |                              |
| vanRA-01    | 29C |       |       |      | LowEfficiency, CtIsSmall, Ci |
| vanRA-02    | 29C |       |       |      | NoAmplification              |
| vanRB       | 29C | 38.33 | 75.06 | 1.63 | MultipleMeltPeaks            |
| vanRC       | 29C |       |       |      | CurveFitFailed               |
| vanRC4      | 29C |       |       |      | LowEfficiency, CtIsSmall, Ci |
| vanRD       | 29C |       |       |      | BadR2, CtIsSmall, Saturatio  |
| vanSA       | 29C |       |       |      | LowEfficiency, CtIsSmall, S: |
| vanSB       | 29C | 29.15 | 74.98 | 2.08 |                              |
| vanSC-01    | 29C | 35.17 | 77.67 | 2.01 | MultipleMeltPeaks            |
| vanSC-02    | 29C |       |       |      | NoAmplification              |
| vanTC-01    | 29C |       |       |      | LowEfficiency, CtIsSmall, S: |
| vanTC-02    | 29C | 32.12 | 90.27 | 1.98 | MultipleMeltPeaks            |
| vanTE       | 29C |       |       |      | LowEfficiency, CtIsSmall, Ci |
| vanTG       | 29C |       |       |      | LowEfficiency, CtIsSmall, Ci |
| vanWB       | 29C |       |       |      | LowEfficiency, CtIsSmall, Ci |
| vanWG       | 29C |       |       |      | LowEfficiency, CtIsSmall, S: |
| vanXA       | 29C |       |       |      | LowEfficiency, CtIsSmall, S: |
| vanXB       | 29C |       |       |      | NoAmplification              |
| vanXD       | 29C | 32.64 | 75.37 | 2.07 |                              |

|              |     |       |       |      |                             |
|--------------|-----|-------|-------|------|-----------------------------|
| vanYB        | 29C | 37.86 | 82.85 | 1.89 |                             |
| vanYD-01     | 29C | 30.81 | 89.9  | 1.69 |                             |
| vanYD-02     | 29C |       |       |      | LowEfficiency, CtIsSmall, S |
| vatB-01      | 29C |       |       |      | LowEfficiency, CtIsSmall, C |
| vatB-02      | 29C | 39.78 | 78.27 | 1.71 | MultipleMeltPeaks           |
| vatC-01      | 29C | 34.77 | 81.26 | 1.9  |                             |
| vatC-02      | 29C | 34.59 | 87.68 | 1.99 |                             |
| vatE-01      | 29C | 30.66 | 76.6  | 2.13 |                             |
| vatE-02      | 29C |       |       |      | NoAmplification             |
| vgaA-01      | 29C |       |       |      | LowEfficiency, CtIsSmall, C |
| vgaA-02      | 29C |       |       |      | CurveFitFailed              |
| vgb-01       | 29C | 36.66 | 84.74 | 1.84 |                             |
| vgbB-01      | 29C | 37.11 | 87.87 | 1.75 |                             |
| vgbB-02      | 29C |       |       |      | LowEfficiency, CtIsSmall, S |
| yceE/mdtG-0  | 29C |       |       |      | BadR2, LowEfficiency, CtIsS |
| yceE/mdtG-0  | 29C | 34.13 | 81.1  | 1.97 |                             |
| yceL/mdtH-0  | 29C | 29.64 | 84.1  | 1.84 | MultipleMeltPeaks           |
| yceL/mdtH-0  | 29C |       |       |      | LowEfficiency, CtIsSmall, C |
| yceL/mdtH-0  | 29C | 31.94 | 87.17 | 1.97 | MultipleMeltPeaks           |
| yidY/mdtL-01 | 29C | 30.14 | 88.74 | 2    |                             |
| yidY/mdtL-02 | 29C | 32.7  | 93.03 | 1.91 |                             |































| Assay          | Sample | Ct | Tm    | Efficiency | flag                         |
|----------------|--------|----|-------|------------|------------------------------|
| 16S rRNA       | 30A    |    | 18.14 | 82.53      | 2.03                         |
| aac            | 30A    |    | 29.88 | 86.85      | 2                            |
| aac(6')-Ib(akz | 30A    |    |       |            | NoAmplification              |
| aac(6')-Ib(akz | 30A    |    | 30.9  | 86.47      | 1.96                         |
| aac(6')-Ib(akz | 30A    |    | 30.95 | 85.5       | 2 MultipleMeltPeaks          |
| aac(6')-II     | 30A    |    | 41.57 | 78.3       | 1.51 MultipleMeltPeaks       |
| aac(6')I1      | 30A    |    | 34.26 | 85.48      | 1.86                         |
| aacA/aphD      | 30A    |    |       |            | NoAmplification              |
| aacC           | 30A    |    | 33.31 | 92.22      | 1.93 MultipleMeltPeaks       |
| aacC1          | 30A    |    |       |            | NoAmplification              |
| aacC2          | 30A    |    |       |            | NoAmplification              |
| aacC4          | 30A    |    | 36.69 | 78.41      | 1.76 MultipleMeltPeaks       |
| aadA-01        | 30A    |    |       |            | LowEfficiency, CtIsSmall, S: |
| aadA-02        | 30A    |    | 37.41 | 80.63      | 1.81                         |
| aadA-1-01      | 30A    |    | 34.07 | 82         | 1.92                         |
| aadA-1-02      | 30A    |    |       |            | NoAmplification              |
| aadA1          | 30A    |    | 29.16 | 79.73      | 2.01 MultipleMeltPeaks       |
| aadA2-01       | 30A    |    | 36.55 | 91.09      | 1.73 MultipleMeltPeaks       |
| aadA2-02       | 30A    |    | 33.97 | 75.41      | 2.02                         |
| aadA2-03       | 30A    |    |       |            | NoAmplification              |
| aadA5-01       | 30A    |    | 36.02 | 89.12      | 1.75                         |
| aadA5-02       | 30A    |    | 36.55 | 77.68      | 1.86                         |
| aadA9-01       | 30A    |    | 36.15 | 85.68      | 1.79                         |
| aadA9-02       | 30A    |    | 38.29 | 81.03      | 1.92                         |
| aadD           | 30A    |    |       |            | NoAmplification              |
| aadE           | 30A    |    |       |            | NoAmplification              |
| acrA-01        | 30A    |    | 30.94 | 89.28      | 1.91                         |
| acrA-02        | 30A    |    | 36.05 | 87.5       | 1.79                         |
| acrA-03        | 30A    |    |       |            | CurveFitFailed               |
| acrA-04        | 30A    |    | 31.14 | 80.91      | 1.99                         |
| acrA-05        | 30A    |    | 31.02 | 88.61      | 1.95 MultipleMeltPeaks       |
| acrB-01        | 30A    |    | 31.69 | 81.07      | 1.89 MultipleMeltPeaks       |
| acrF           | 30A    |    | 28.11 | 82.9       | 1.82                         |
| acrR-01        | 30A    |    | 33.17 | 89.69      | 1.94                         |
| acrR-02        | 30A    |    | 30.9  | 85.58      | 1.94                         |
| Actin          | 30A    |    | 20.78 | 87.28      | 1.95                         |
| adeA           | 30A    |    | 34.66 | 88.23      | 1.89                         |
| ampC-01        | 30A    |    | 30.95 | 84.78      | 1.98 MultipleMeltPeaks       |
| ampC-02        | 30A    |    | 37.7  | 86.67      | 1.88 MultipleMeltPeaks       |
| ampC-04        | 30A    |    | 31.31 | 78.95      | 1.88                         |
| ampC-05        | 30A    |    |       |            | NoAmplification              |
| ampC-06        | 30A    |    | 28.98 | 84.54      | 1.96                         |
| ampC-07        | 30A    |    | 33.63 | 88.65      | 1.86                         |
| ampC-09        | 30A    |    |       |            | NoAmplification              |
| ampC/blaDH     | 30A    |    | 31.74 | 77.77      | 1.69 MultipleMeltPeaks       |

|                            |     |       |       |      |                              |
|----------------------------|-----|-------|-------|------|------------------------------|
| aph                        | 30A |       |       |      | LowEfficiency, CtIsSmall, S: |
| aph(2')-Id-01              | 30A |       |       |      | LowEfficiency, CtIsSmall, C: |
| aph(2')-Id-02              | 30A |       |       |      | NoAmplification              |
| aph6ia                     | 30A | 38.82 | 76.03 | 1.82 | MultipleMeltPeaks            |
| aphA1(aka k <sub>z</sub> ) | 30A |       |       |      | LowEfficiency, CtIsSmall, S: |
| bacA-01                    | 30A | 40.29 | 77.02 | 1.77 |                              |
| bacA-02                    | 30A | 33.37 | 88.07 | 1.81 |                              |
| BETA-globin                | 30A | 23.17 | 84.26 | 2.01 | MultipleMeltPeaks            |
| bla-ACC-1                  | 30A | 35.39 | 86.29 | 1.84 |                              |
| bla-L1                     | 30A | 28.46 | 85.98 | 2.02 |                              |
| bla1                       | 30A |       |       |      | LowEfficiency, CtIsSmall, C: |
| blaCMY                     | 30A |       |       |      | CurveFitFailed               |
| blaCMY2-01                 | 30A | 38.91 | 83.2  | 1.72 | MultipleMeltPeaks            |
| blaCMY2-02                 | 30A | 28.57 | 87.16 | 1.99 | MultipleMeltPeaks            |
| blaCTX-M-01                | 30A | 38.45 | 62.02 | 1.75 | MultipleMeltPeaks            |
| blaCTX-M-02                | 30A | 36.15 | 80.13 | 1.77 | MultipleMeltPeaks            |
| blaCTX-M-03                | 30A |       |       |      | CurveFitFailed               |
| blaCTX-M-04                | 30A | 37.54 | 88.58 | 1.74 |                              |
| blaCTX-M-05                | 30A | 35.09 | 76.07 | 1.7  |                              |
| blaCTX-M-06                | 30A | 33.58 | 78.58 | 1.98 |                              |
| blaGES                     | 30A |       |       |      | NoAmplification              |
| blaIMP-01                  | 30A |       |       |      | NoAmplification              |
| blaIMP-02                  | 30A | 37.98 | 77.52 | 1.93 |                              |
| blaMOX/blaC                | 30A |       |       |      | NoAmplification              |
| blaOCH                     | 30A |       |       |      | NoAmplification              |
| blaOKP                     | 30A |       |       |      | NoAmplification              |
| blaOXA1/blaC               | 30A |       |       |      | LowEfficiency, CtIsSmall, S: |
| blaOXA10-01                | 30A |       |       |      | NoAmplification              |
| blaOXA10-02                | 30A |       |       |      | CurveFitFailed               |
| blaOXY                     | 30A | 33.19 | 90.46 | 1.82 |                              |
| blaPAO                     | 30A | 40.23 | 61.95 | 1.57 | MultipleMeltPeaks            |
| blaPER                     | 30A | 35.86 | 78.47 | 1.89 |                              |
| blaPSE                     | 30A |       |       |      | NoAmplification              |
| blaROB                     | 30A |       |       |      | NoAmplification              |
| blaSFO                     | 30A | 32.93 | 87.04 | 1.95 |                              |
| blaSHV-01                  | 30A | 37.31 | 76    | 1.69 |                              |
| blaSHV-02                  | 30A | 38.47 | 78.43 | 1.86 | MultipleMeltPeaks            |
| blaTEM                     | 30A | 27.61 | 79.56 | 1.93 |                              |
| blaTLA                     | 30A |       |       |      | NoAmplification              |
| blaVEB                     | 30A |       |       |      | NoAmplification              |
| blaVIM                     | 30A |       |       |      | NoAmplification              |
| blaZ                       | 30A |       |       |      | NoAmplification              |
| carB                       | 30A | 33.98 | 83.25 | 1.93 |                              |
| catA1                      | 30A |       |       |      | NoAmplification              |
| catB3                      | 30A | 33.37 | 79.98 | 2.01 | MultipleMeltPeaks            |
| catB8                      | 30A | 29.12 | 81.86 | 1.96 |                              |

|            |     |       |       |      |                              |
|------------|-----|-------|-------|------|------------------------------|
| ceoA       | 30A | 26.07 | 82.06 | 1.93 | MultipleMeltPeaks            |
| cepA       | 30A |       |       |      | NoAmplification              |
| cfiA       | 30A | 31.46 | 87.12 | 1.93 |                              |
| cfr        | 30A |       |       |      | LowEfficiency, CtIsSmall, S: |
| cfxA       | 30A | 37.02 | 80.09 | 1.84 |                              |
| cmeA       | 30A | 39.17 | 83.8  | 1.71 |                              |
| cmlA1-01   | 30A | 38.49 | 80.83 | 1.82 |                              |
| cmlA1-02   | 30A | 36.35 | 81.88 | 1.86 |                              |
| cmr        | 30A | 35.85 | 78.84 | 1.86 |                              |
| cmx(A)     | 30A | 28.1  | 86.71 | 2    | MultipleMeltPeaks            |
| cphA-01    | 30A | 33.07 | 85.87 | 1.94 |                              |
| cphA-02    | 30A | 33.92 | 82.8  | 1.96 |                              |
| dfrA1      | 30A | 34.16 | 83.44 | 1.94 |                              |
| dfrA12     | 30A | 32.21 | 86.38 | 1.76 |                              |
| emrD       | 30A | 33.13 | 89.07 | 1.87 |                              |
| ereA       | 30A | 36.62 | 82.82 | 1.84 |                              |
| ereB       | 30A | 33.6  | 85.87 | 1.97 | MultipleMeltPeaks            |
| erm(34)    | 30A | 38.29 | 84.33 | 1.77 | MultipleMeltPeaks            |
| erm(35)    | 30A |       |       |      | NoAmplification              |
| erm(36)    | 30A | 34.41 | 85.69 | 1.68 | MultipleMeltPeaks            |
| ermA       | 30A |       |       |      | LowEfficiency, CtIsSmall, Ci |
| ermA/ermTR | 30A | 37.84 | 82.38 | 1.92 |                              |
| ermB       | 30A |       |       |      | LowEfficiency, CtIsSmall, Ci |
| ermC       | 30A |       |       |      | LowEfficiency, CtIsSmall, Ci |
| ermF       | 30A |       |       |      | LowEfficiency, CtIsSmall, S: |
| ermJ/ermD  | 30A |       |       |      | NoAmplification              |
| ermK-01    | 30A | 38.9  | 81.66 | 1.81 |                              |
| ermK-02    | 30A | 32.07 | 85.93 | 1.89 |                              |
| ermT-01    | 30A |       |       |      | NoAmplification              |
| ermT-02    | 30A |       |       |      | CurveFitFailed               |
| ermX       | 30A | 36.4  | 87.31 | 1.74 | MultipleMeltPeaks            |
| ermY       | 30A |       |       |      | NoAmplification              |
| fabK       | 30A | 28.48 | 79.32 | 2.01 | MultipleMeltPeaks            |
| floR       | 30A |       |       |      | NoAmplification              |
| folA       | 30A |       |       |      | NoAmplification              |
| fosB       | 30A |       |       |      | LowEfficiency, CtIsSmall, S: |
| fosX       | 30A |       |       |      | NoAmplification              |
| fox5       | 30A | 27.72 | 86.97 | 1.94 |                              |
| imiR       | 30A |       |       |      | NoAmplification              |
| ImrA-01    | 30A | 37.42 | 82.28 | 1.81 |                              |
| intl       | 30A | 28.03 | 84.88 | 1.95 | MultipleMeltPeaks            |
| intl1      | 30A | 19.48 | 87.27 | 2.01 |                              |
| IS613      | 30A | 31.77 | 78.33 | 2.03 |                              |
| lnuA-01    | 30A |       |       |      | LowEfficiency, CtIsSmall, Ci |
| lnuB-01    | 30A |       |       |      | LowEfficiency, CtIsSmall, Ci |
| lnuB-02    | 30A |       |       |      | CurveFitFailed               |

|              |     |       |       |                              |
|--------------|-----|-------|-------|------------------------------|
| lnuC         | 30A | 30.37 | 86.54 | 1.87                         |
| marR-01      | 30A | 31    | 85.63 | 1.93                         |
| matA/mel     | 30A | 21.14 | 77.66 | 2.06                         |
| mdet1        | 30A |       |       | NoAmplification              |
| mdtA         | 30A | 36.59 | 82.09 | 1.67                         |
| mdtE/yhiU    | 30A | 38.84 | 87.8  | 1.7 MultipleMeltPeaks        |
| mecA         | 30A |       |       | NoAmplification              |
| mefA         | 30A | 20.34 | 80.46 | 1.98                         |
| mepA         | 30A | 30.58 | 87.95 | 2.01 MultipleMeltPeaks       |
| mexA         | 30A |       |       | CurveFitFailed               |
| mexD         | 30A | 30.53 | 80.71 | 2.04                         |
| mexE         | 30A | 36.31 | 80.3  | 1.8                          |
| mexF         | 30A | 29.98 | 80.91 | 1.7 MultipleMeltPeaks        |
| mphA-01      | 30A | 30.98 | 80.71 | 1.99 MultipleMeltPeaks       |
| mphA-02      | 30A | 29.42 | 87.31 | 2.09                         |
| mphB         | 30A |       |       | CurveFitFailed               |
| mphC         | 30A | 38.24 | 77.62 | 1.73 MultipleMeltPeaks       |
| msrA-01      | 30A |       |       | LowEfficiency, CtIsSmall, Ci |
| msrC-01      | 30A |       |       | NoAmplification              |
| mtrC-01      | 30A | 37.85 | 85.95 | 1.91 MultipleMeltPeaks       |
| mtrC-02      | 30A | 35.96 | 84.39 | 1.86                         |
| mtrD-02      | 30A | 26.66 | 82.31 | 1.97                         |
| mtrD-03      | 30A | 36.54 | 83.11 | 1.78                         |
| NDM1         | 30A |       |       | NoAmplification              |
| nimE         | 30A | 36.26 | 85.01 | 2.1 MultipleMeltPeaks        |
| nisB         | 30A |       |       | CurveFitFailed               |
| oleC         | 30A |       |       | CurveFitFailed               |
| oprD         | 30A | 27.82 | 82.51 | 1.98 MultipleMeltPeaks       |
| oprJ         | 30A | 38.99 | 64.7  | 1.75 MultipleMeltPeaks       |
| pbp          | 30A |       |       | LowEfficiency, CtIsSmall, Ci |
| pbp2x        | 30A |       |       | NoAmplification              |
| Pbp5         | 30A |       |       | LowEfficiency, CtIsSmall, Ci |
| penA         | 30A | 38.63 | 84.94 | 1.69 MultipleMeltPeaks       |
| pikR1        | 30A | 32.99 | 82.36 | 1.99                         |
| pikR2        | 30A | 30.43 | 84.78 | 2.1                          |
| pmrA         | 30A | 27.65 | 79.36 | 2.07                         |
| pncA         | 30A | 34.41 | 90.01 | 1.86 MultipleMeltPeaks       |
| putative mul | 30A | 33.79 | 84.8  | 1.95                         |
| qac          | 30A | 38.38 | 79.48 | 1.79 MultipleMeltPeaks       |
| qacA         | 30A | 33.62 | 70.71 | 1.87                         |
| qacA/qacB    | 30A | 41.79 | 85.04 | 1.42 MultipleMeltPeaks       |
| qacEdelta1-0 | 30A |       |       | NoAmplification              |
| qacEdelta1-0 | 30A | 31.22 | 78.59 | 1.99 MultipleMeltPeaks       |
| qacH-01      | 30A | 38.42 | 85.46 | 1.78 MultipleMeltPeaks       |
| qacH-02      | 30A | 33.84 | 84.08 | 1.64                         |
| qnrA         | 30A | 33.2  | 86.25 | 1.97                         |



|              |     |       |       |      |                             |
|--------------|-----|-------|-------|------|-----------------------------|
| rarD-02      | 30A | 33.11 | 85.65 | 1.97 |                             |
| sat4         | 30A |       |       |      | LowEfficiency, CtIsSmall, C |
| sdeB         | 30A |       |       |      | LowEfficiency, CtIsSmall, S |
| spcN-01      | 30A |       |       |      | NoAmplification             |
| speA         | 30A |       |       |      | NoAmplification             |
| str          | 30A |       |       |      | NoAmplification             |
| strA         | 30A |       |       |      | NoAmplification             |
| strB         | 30A | 38.52 | 79.2  | 1.7  | MultipleMeltPeaks           |
| sul1         | 30A | 38.29 | 90.19 | 1.66 | MultipleMeltPeaks           |
| sul2         | 30A |       |       |      | NoAmplification             |
| sulA/foIP-01 | 30A | 27.28 | 81.7  | 1.95 |                             |
| sulA/foIP-03 | 30A | 25.53 | 81.9  | 1.98 |                             |
| tet(32)      | 30A |       |       |      | NoAmplification             |
| tet(34)      | 30A | 31.69 | 75.74 | 2.02 |                             |
| tet(35)      | 30A | 37.63 | 75.51 | 1.97 | MultipleMeltPeaks           |
| tet(36)-A    | 30A |       |       |      | CurveFitFailed              |
| tet(36)-B    | 30A |       |       |      | NoAmplification             |
| tet(37)      | 30A | 30.71 | 83.67 | 1.92 | MultipleMeltPeaks           |
| tetA-01      | 30A | 29.29 | 85.17 | 1.93 |                             |
| tetA-02      | 30A | 31.25 | 87.97 | 1.92 |                             |
| tetB-01      | 30A | 33.19 | 88.44 | 1.9  |                             |
| tetB-02      | 30A | 30.96 | 76.37 | 1.97 |                             |
| tetC-01      | 30A |       |       |      | NoAmplification             |
| tetC-02      | 30A |       |       |      | LowEfficiency, CtIsSmall, S |
| tetD-01      | 30A |       |       |      | CurveFitFailed              |
| tetD-02      | 30A | 37.9  | 62.36 | 1.74 | MultipleMeltPeaks           |
| tetE         | 30A |       |       |      | NoAmplification             |
| tetG-01      | 30A | 37.49 | 82.67 | 1.75 |                             |
| tetG-02      | 30A | 33.74 | 89.05 | 1.89 |                             |
| tetH         | 30A | 32.68 | 78.26 | 2.09 |                             |
| tetJ         | 30A |       |       |      | NoAmplification             |
| tetK         | 30A |       |       |      | LowEfficiency, CtIsSmall, S |
| tetL-01      | 30A |       |       |      | NoAmplification             |
| tetL-02      | 30A | 33.8  | 85.3  | 1.75 |                             |
| tetM-01      | 30A | 24.42 | 76.21 | 1.98 |                             |
| tetM-02      | 30A | 24.49 | 78.39 | 2.02 |                             |
| tetO-01      | 30A |       |       |      | NoAmplification             |
| tetPA        | 30A |       |       |      | NoAmplification             |
| tetPB-01     | 30A |       |       |      | NoAmplification             |
| tetPB-02     | 30A | 29    | 85.31 | 2    |                             |
| tetPB-03     | 30A |       |       |      | LowEfficiency, CtIsSmall, S |
| tetPB-05     | 30A |       |       |      | NoAmplification             |
| tetQ         | 30A |       |       |      | CurveFitFailed              |
| tetR-02      | 30A | 30.41 | 89.89 | 1.86 |                             |
| tetR-03      | 30A |       |       |      | NoAmplification             |
| tetS         | 30A | 35.56 | 77.02 | 1.95 | MultipleMeltPeaks           |

|             |     |       |       |                                          |
|-------------|-----|-------|-------|------------------------------------------|
| tetT        | 30A |       |       | NoAmplification                          |
| tetU-01     | 30A |       |       | NoAmplification                          |
| tetV        | 30A |       |       | LowEfficiency, CtIsSmall, Ci             |
| tetW-01     | 30A |       |       | CurveFitFailed                           |
| tetX        | 30A |       |       | BadR2, CtIsSmall, Saturatio              |
| tnpA-01     | 30A |       |       | LowEfficiency, CtIsSmall, S <sub>e</sub> |
| tnpA-02     | 30A | 34.38 | 86.79 | 1.74 MultipleMeltPeaks                   |
| tnpA-03     | 30A | 35.05 | 74.29 | 1.66 MultipleMeltPeaks                   |
| tnpA-04     | 30A | 28.43 | 82.71 | 1.94                                     |
| tnpA-05     | 30A | 29.21 | 81.04 | 1.92                                     |
| tnpA-07     | 30A | 29.07 | 76.85 | 1.97                                     |
| tolC-01     | 30A |       |       | LowEfficiency, CtIsSmall, S <sub>e</sub> |
| tolC-02     | 30A | 30.33 | 87.81 | 1.99 MultipleMeltPeaks                   |
| tolC-03     | 30A | 30.61 | 87.53 | 1.95                                     |
| Tp614       | 30A | 30.61 | 83.76 | 1.93                                     |
| ttgA        | 30A | 37.01 | 76.41 | 1.89                                     |
| ttgB        | 30A | 32.48 | 80.34 | 1.99 MultipleMeltPeaks                   |
| vanA        | 30A |       |       | NoAmplification                          |
| vanB-01     | 30A | 33.82 | 83.83 | 1.94                                     |
| vanC-01     | 30A |       |       | CurveFitFailed                           |
| vanC-02     | 30A |       |       | NoAmplification                          |
| vanC-03     | 30A | 26.39 | 86.13 | 1.92 MultipleMeltPeaks                   |
| vanC1       | 30A |       |       | NoAmplification                          |
| vanC2/vanC3 | 30A | 33.64 | 84.86 | 2.01                                     |
| vanG        | 30A |       |       | NoAmplification                          |
| vanHB       | 30A | 36.67 | 78.41 | 1.89                                     |
| vanHD       | 30A |       |       | NoAmplification                          |
| vanRA-01    | 30A |       |       | NoAmplification                          |
| vanRA-02    | 30A |       |       | NoAmplification                          |
| vanRB       | 30A | 32.82 | 87.46 | 2.07                                     |
| vanRC       | 30A |       |       | NoAmplification                          |
| vanRC4      | 30A |       |       | NoAmplification                          |
| vanRD       | 30A |       |       | NoAmplification                          |
| vanSA       | 30A |       |       | LowEfficiency, CtIsSmall, Ci             |
| vanSB       | 30A | 34.06 | 74.35 | 2.04                                     |
| vanSC-01    | 30A | 35.36 | 84.63 | 1.93                                     |
| vanSC-02    | 30A |       |       | NoAmplification                          |
| vanTC-01    | 30A |       |       | LowEfficiency, CtIsSmall, S <sub>e</sub> |
| vanTC-02    | 30A | 39.15 | 86.91 | 1.65                                     |
| vanTE       | 30A | 38.34 | 84.53 | 1.65 MultipleMeltPeaks                   |
| vanTG       | 30A |       |       | NoAmplification                          |
| vanWB       | 30A |       |       | NoAmplification                          |
| vanWG       | 30A | 37.87 | 74.42 | 1.86                                     |
| vanXA       | 30A | 34.86 | 86.35 | 1.87                                     |
| vanXB       | 30A |       |       | NoAmplification                          |
| vanXD       | 30A | 30.66 | 75.55 | 2.06                                     |

|              |     |       |       |      |                              |
|--------------|-----|-------|-------|------|------------------------------|
| vanYB        | 30A | 36.69 | 85.14 | 1.88 | MultipleMeltPeaks            |
| vanYD-01     | 30A | 31.67 | 82.26 | 1.82 | MultipleMeltPeaks            |
| vanYD-02     | 30A |       |       |      | NoAmplification              |
| vatB-01      | 30A |       |       |      | NoAmplification              |
| vatB-02      | 30A |       |       |      | LowEfficiency, CtIsSmall, Ci |
| vatC-01      | 30A | 37.55 | 80.55 | 1.82 |                              |
| vatC-02      | 30A | 37.96 | 73.85 | 1.79 | MultipleMeltPeaks            |
| vatE-01      | 30A | 29.81 | 75.85 | 2.12 |                              |
| vatE-02      | 30A |       |       |      | NoAmplification              |
| vgaA-01      | 30A |       |       |      | NoAmplification              |
| vgaA-02      | 30A |       |       |      | LowEfficiency, CtIsSmall, S: |
| vgb-01       | 30A | 35.6  | 75.45 | 1.92 | MultipleMeltPeaks            |
| vgbB-01      | 30A | 37.55 | 87.41 | 1.96 | MultipleMeltPeaks            |
| vgbB-02      | 30A |       |       |      | NoAmplification              |
| yceE/mdtG-0  | 30A | 41.12 | 78.09 | 1.71 | MultipleMeltPeaks            |
| yceE/mdtG-0  | 30A | 37.55 | 81.33 | 1.74 |                              |
| yceL/mdtH-0  | 30A | 30.4  | 84.08 | 1.98 | MultipleMeltPeaks            |
| yceL/mdtH-0  | 30A |       |       |      | NoAmplification              |
| yceL/mdtH-0  | 30A | 36.68 | 81.86 | 1.8  |                              |
| yidY/mdtL-01 | 30A | 30.42 | 84.71 | 1.96 |                              |
| yidY/mdtL-02 | 30A |       |       |      | LowEfficiency, CtIsSmall, Ci |































| Assay          | Sample | Ct | Tm    | Efficiency | flag                         |
|----------------|--------|----|-------|------------|------------------------------|
| 16S rRNA       | 30B    |    | 15.16 | 82.36      | 2.08                         |
| aac            | 30B    |    | 31    | 81.39      | 1.57 MultipleMeltPeaks       |
| aac(6')-Ib(akz | 30B    |    |       |            | CurveFitFailed               |
| aac(6')-Ib(akz | 30B    |    | 30.11 | 82.6       | 1.99 MultipleMeltPeaks       |
| aac(6')-Ib(akz | 30B    |    | 33.42 | 77.53      | 1.94 MultipleMeltPeaks       |
| aac(6')-II     | 30B    |    |       |            | CurveFitFailed               |
| aac(6')I1      | 30B    |    | 37.54 | 84.88      | 1.73 MultipleMeltPeaks       |
| aacA/aphD      | 30B    |    |       |            | LowEfficiency, CtIsSmall, S: |
| aacC           | 30B    |    | 33.21 | 81.44      | 1.84 MultipleMeltPeaks       |
| aacC1          | 30B    |    |       |            | LowEfficiency, CtIsSmall, S: |
| aacC2          | 30B    |    |       |            | LowEfficiency, CtIsSmall, C: |
| aacC4          | 30B    |    | 32.89 | 84.44      | 1.9 MultipleMeltPeaks        |
| aadA-01        | 30B    |    |       |            | CurveFitFailed               |
| aadA-02        | 30B    |    | 36.93 | 80.42      | 1.89 MultipleMeltPeaks       |
| aadA-1-01      | 30B    |    | 36.65 | 79.06      | 1.89 MultipleMeltPeaks       |
| aadA-1-02      | 30B    |    |       |            | LowEfficiency, CtIsSmall, S: |
| aadA1          | 30B    |    | 34.16 | 83.28      | 1.99                         |
| aadA2-01       | 30B    |    |       |            | CurveFitFailed               |
| aadA2-02       | 30B    |    | 31.31 | 75.61      | 1.99                         |
| aadA2-03       | 30B    |    |       |            | LowEfficiency, CtIsSmall, S: |
| aadA5-01       | 30B    |    | 36.4  | 75.99      | 1.89 MultipleMeltPeaks       |
| aadA5-02       | 30B    |    | 34.67 | 84.04      | 1.96                         |
| aadA9-01       | 30B    |    | 34.32 | 87.26      | 1.84 MultipleMeltPeaks       |
| aadA9-02       | 30B    |    |       |            | LowEfficiency, CtIsSmall, S: |
| aadD           | 30B    |    |       |            | LowEfficiency, CtIsSmall, S: |
| aadE           | 30B    |    |       |            | LowEfficiency, CtIsSmall, S: |
| acrA-01        | 30B    |    | 31.7  | 89.39      | 1.96                         |
| acrA-02        | 30B    |    |       |            | CurveFitFailed               |
| acrA-03        | 30B    |    | 32.47 | 78.26      | 1.94                         |
| acrA-04        | 30B    |    | 30.29 | 81.05      | 1.98                         |
| acrA-05        | 30B    |    | 29.72 | 88.61      | 1.99                         |
| acrB-01        | 30B    |    | 29.09 | 81.13      | 1.97 MultipleMeltPeaks       |
| acrF           | 30B    |    | 29.07 | 82.74      | 1.59                         |
| acrR-01        | 30B    |    | 30.25 | 80.06      | 2.04                         |
| acrR-02        | 30B    |    | 32.65 | 85.61      | 1.97                         |
| Actin          | 30B    |    | 20.22 | 87.27      | 2                            |
| adeA           | 30B    |    |       |            | CurveFitFailed               |
| ampC-01        | 30B    |    | 32.02 | 85.42      | 2.03                         |
| ampC-02        | 30B    |    |       |            | LowEfficiency, CtIsSmall, S: |
| ampC-04        | 30B    |    | 32.23 | 78.77      | 1.81                         |
| ampC-05        | 30B    |    |       |            | LowEfficiency, CtIsSmall, S: |
| ampC-06        | 30B    |    |       |            | CurveFitFailed               |
| ampC-07        | 30B    |    | 35.23 | 88.27      | 1.84                         |
| ampC-09        | 30B    |    |       |            | LowEfficiency, CtIsSmall, S: |
| ampC/blaDH     | 30B    |    | 29.86 | 84.31      | 1.98 MultipleMeltPeaks       |

|                          |     |       |       |      |                                          |
|--------------------------|-----|-------|-------|------|------------------------------------------|
| aph                      | 30B |       |       |      | CurveFitFailed                           |
| aph(2')-Id-01            | 30B |       |       |      | CurveFitFailed                           |
| aph(2')-Id-02            | 30B |       |       |      | CurveFitFailed                           |
| aph6ia                   | 30B |       |       |      | CurveFitFailed                           |
| aphA1(aka k <sub>z</sub> | 30B | 29.44 | 76.91 | 2.09 |                                          |
| bacA-01                  | 30B | 31.46 | 87.45 | 1.83 |                                          |
| bacA-02                  | 30B |       |       |      | CurveFitFailed                           |
| BETA-globin              | 30B | 21.71 | 84.32 | 2.02 | MultipleMeltPeaks                        |
| bla-ACC-1                | 30B | 36.44 | 86.42 | 1.82 |                                          |
| bla-L1                   | 30B | 30.22 | 85.2  | 1.98 |                                          |
| bla1                     | 30B |       |       |      | LowEfficiency, CtIsSmall, Ci             |
| blaCMY                   | 30B |       |       |      | LowEfficiency, CtIsSmall, S <sub>e</sub> |
| blaCMY2-01               | 30B | 34.44 | 84.25 | 2.14 |                                          |
| blaCMY2-02               | 30B | 27.95 | 85.76 | 1.99 |                                          |
| blaCTX-M-01              | 30B |       |       |      | CurveFitFailed                           |
| blaCTX-M-02              | 30B | 31.16 | 77.29 | 1.84 | MultipleMeltPeaks                        |
| blaCTX-M-03              | 30B | 36.36 | 85.32 | 1.89 |                                          |
| blaCTX-M-04              | 30B | 32.5  | 89.65 | 1.75 |                                          |
| blaCTX-M-05              | 30B | 37.08 | 75.28 | 1.63 |                                          |
| blaCTX-M-06              | 30B | 34.88 | 78.06 | 1.96 |                                          |
| blaGES                   | 30B |       |       |      | LowEfficiency, CtIsSmall, Ci             |
| blaIMP-01                | 30B |       |       |      | LowEfficiency, CtIsSmall, Ci             |
| blaIMP-02                | 30B |       |       |      | LowEfficiency, CtIsSmall, S <sub>e</sub> |
| blaMOX/blaC              | 30B |       |       |      | NoAmplification                          |
| blaOCH                   | 30B |       |       |      | NoAmplification                          |
| blaOKP                   | 30B |       |       |      | NoAmplification                          |
| blaOXA1/blaC             | 30B |       |       |      | LowEfficiency, CtIsSmall, S <sub>e</sub> |
| blaOXA10-01              | 30B |       |       |      | CurveFitFailed                           |
| blaOXA10-02              | 30B |       |       |      | CurveFitFailed                           |
| blaOXY                   | 30B | 35.73 | 89.89 | 1.82 |                                          |
| blaPAO                   | 30B |       |       |      | CurveFitFailed                           |
| blaPER                   | 30B |       |       |      | LowEfficiency, CtIsSmall, S <sub>e</sub> |
| blaPSE                   | 30B |       |       |      | CurveFitFailed                           |
| blaROB                   | 30B |       |       |      | NoAmplification                          |
| blaSFO                   | 30B | 31.82 | 81.53 | 1.9  |                                          |
| blaSHV-01                | 30B |       |       |      | CurveFitFailed                           |
| blaSHV-02                | 30B |       |       |      | LowEfficiency, CtIsSmall, Ci             |
| blaTEM                   | 30B | 29.5  | 79.31 | 1.77 |                                          |
| blaTLA                   | 30B |       |       |      | LowEfficiency, CtIsSmall, S <sub>e</sub> |
| blaVEB                   | 30B |       |       |      | LowEfficiency, CtIsSmall, Ci             |
| blaVIM                   | 30B |       |       |      | NoAmplification                          |
| blaZ                     | 30B | 28.12 | 73.38 | 2.03 |                                          |
| carB                     | 30B | 34.62 | 77.73 | 2.03 |                                          |
| catA1                    | 30B |       |       |      | NoAmplification                          |
| catB3                    | 30B | 35.37 | 81.43 | 1.99 | MultipleMeltPeaks                        |
| catB8                    | 30B | 28.85 | 81.66 | 2.02 |                                          |

|            |     |       |       |      |                              |
|------------|-----|-------|-------|------|------------------------------|
| ceoA       | 30B | 27.07 | 82.99 | 1.95 |                              |
| cepA       | 30B |       |       |      | LowEfficiency, CtIsSmall, S: |
| cfiA       | 30B | 31.16 | 88.21 | 2    |                              |
| cfr        | 30B |       |       |      | LowEfficiency, CtIsSmall, S: |
| cfxA       | 30B |       |       |      | LowEfficiency, CtIsSmall, S: |
| cmeA       | 30B |       |       |      | LowEfficiency, CtIsSmall, S: |
| cmlA1-01   | 30B |       |       |      | CurveFitFailed               |
| cmlA1-02   | 30B | 33.76 | 83.16 | 1.95 |                              |
| cmr        | 30B |       |       |      | LowEfficiency, CtIsSmall, S: |
| cmx(A)     | 30B | 26.07 | 84.35 | 1.99 | MultipleMeltPeaks            |
| cphA-01    | 30B | 32.85 | 85.81 | 1.99 | MultipleMeltPeaks            |
| cphA-02    | 30B | 29.48 | 80.07 | 1.98 |                              |
| dfrA1      | 30B |       |       |      | LowEfficiency, CtIsSmall, S: |
| dfrA12     | 30B | 31.37 | 86.37 | 1.74 |                              |
| emrD       | 30B | 32.72 | 88.5  | 1.9  |                              |
| ereA       | 30B |       |       |      | LowEfficiency, CtIsSmall, S: |
| ereB       | 30B |       |       |      | CurveFitFailed               |
| erm(34)    | 30B |       |       |      | NoAmplification              |
| erm(35)    | 30B |       |       |      | LowEfficiency, CtIsSmall, C: |
| erm(36)    | 30B | 29.11 | 82.74 | 2.08 |                              |
| ermA       | 30B |       |       |      | LowEfficiency, CtIsSmall, S: |
| ermA/ermTR | 30B |       |       |      | NoAmplification              |
| ermB       | 30B |       |       |      | LowEfficiency, CtIsSmall, C: |
| ermC       | 30B | 29.73 | 75.33 | 1.91 |                              |
| ermF       | 30B |       |       |      | LowEfficiency, CtIsSmall, S: |
| ermJ/ermD  | 30B |       |       |      | LowEfficiency, CtIsSmall, S: |
| ermK-01    | 30B | 30    | 87.88 | 2.02 | MultipleMeltPeaks            |
| ermK-02    | 30B | 31.89 | 86.03 | 1.93 |                              |
| ermT-01    | 30B |       |       |      | LowEfficiency, CtIsSmall, S: |
| ermT-02    | 30B |       |       |      | CurveFitFailed               |
| ermX       | 30B | 36.32 | 87.58 | 1.76 |                              |
| ermY       | 30B |       |       |      | LowEfficiency, CtIsSmall, S: |
| fabK       | 30B | 27.22 | 79.26 | 2.11 |                              |
| floR       | 30B |       |       |      | NoAmplification              |
| folA       | 30B |       |       |      | NoAmplification              |
| fosB       | 30B |       |       |      | LowEfficiency, CtIsSmall, S: |
| fosX       | 30B |       |       |      | CurveFitFailed               |
| fox5       | 30B | 28.13 | 86.96 | 1.98 |                              |
| imiR       | 30B |       |       |      | LowEfficiency, CtIsSmall, S: |
| ImrA-01    | 30B |       |       |      | CurveFitFailed               |
| intl       | 30B | 29.43 | 84.68 | 1.96 | MultipleMeltPeaks            |
| intl1      | 30B | 20.43 | 87.15 | 2.02 |                              |
| IS613      | 30B | 33.49 | 78.23 | 2.06 |                              |
| lnuA-01    | 30B |       |       |      | LowEfficiency, CtIsSmall, S: |
| lnuB-01    | 30B |       |       |      | CurveFitFailed               |
| lnuB-02    | 30B |       |       |      | CurveFitFailed               |

|                |     |       |       |      |                              |
|----------------|-----|-------|-------|------|------------------------------|
| lnuC           | 30B | 34.66 | 84.93 | 1.78 | MultipleMeltPeaks            |
| marR-01        | 30B | 32.52 | 85.62 | 1.93 |                              |
| matA/mel       | 30B | 19.65 | 77.5  | 2.08 |                              |
| mdetI1         | 30B |       |       |      | LowEfficiency, CtIsSmall, S: |
| mdtA           | 30B | 33.21 | 84.51 | 1.93 |                              |
| mdtE/yhiU      | 30B | 37.77 | 85.9  | 1.71 |                              |
| mecA           | 30B |       |       |      | LowEfficiency, CtIsSmall, S: |
| mefA           | 30B | 19.19 | 80.46 | 2.02 |                              |
| mepA           | 30B | 32.11 | 88.1  | 2.02 | MultipleMeltPeaks            |
| mexA           | 30B | 35.35 | 85.88 | 1.81 |                              |
| mexD           | 30B | 32.49 | 80.42 | 2.04 |                              |
| mexE           | 30B |       |       |      | CurveFitFailed               |
| mexF           | 30B | 26.73 | 86.88 | 2.11 | MultipleMeltPeaks            |
| mphA-01        | 30B | 28.62 | 87.32 | 1.97 |                              |
| mphA-02        | 30B | 30.03 | 87.17 | 1.81 |                              |
| mphB           | 30B |       |       |      | CurveFitFailed               |
| mphC           | 30B |       |       |      | NoAmplification              |
| msrA-01        | 30B |       |       |      | CurveFitFailed               |
| msrC-01        | 30B |       |       |      | NoAmplification              |
| mtrC-01        | 30B | 35.89 | 84.54 | 1.97 |                              |
| mtrC-02        | 30B | 30.63 | 75.2  | 1.93 |                              |
| mtrD-02        | 30B | 28.23 | 81.49 | 1.97 |                              |
| mtrD-03        | 30B |       |       |      | LowEfficiency, CtIsSmall, S: |
| NDM1           | 30B |       |       |      | LowEfficiency, CtIsSmall, S: |
| nimE           | 30B |       |       |      | CurveFitFailed               |
| nisB           | 30B | 38    | 73.57 | 1.82 | MultipleMeltPeaks            |
| oleC           | 30B |       |       |      | CurveFitFailed               |
| oprD           | 30B | 28.3  | 86.69 | 2    | MultipleMeltPeaks            |
| oprJ           | 30B | 32.41 | 86.38 | 1.94 |                              |
| pbp            | 30B | 33.25 | 76.44 | 1.94 |                              |
| pbp2x          | 30B |       |       |      | LowEfficiency, CtIsSmall, C: |
| Pbp5           | 30B |       |       |      | LowEfficiency, CtIsSmall, S: |
| penA           | 30B |       |       |      | NoAmplification              |
| pikR1          | 30B |       |       |      | CurveFitFailed               |
| pikR2          | 30B | 34.16 | 85.18 | 1.88 | MultipleMeltPeaks            |
| pmrA           | 30B | 20.8  | 79.48 | 2.08 |                              |
| pncA           | 30B | 33.15 | 89.46 | 1.93 |                              |
| putative multi | 30B | 31.17 | 84.84 | 2.02 |                              |
| qac            | 30B | 35.89 | 80.28 | 1.94 |                              |
| qacA           | 30B |       |       |      | CurveFitFailed               |
| qacA/qacB      | 30B |       |       |      | BadR2, LowEfficiency, CtIsS  |
| qacEdelta1-0   | 30B |       |       |      | LowEfficiency, CtIsSmall, S: |
| qacEdelta1-0   | 30B | 27.59 | 81.15 | 1.99 |                              |
| qacH-01        | 30B | 34.26 | 86.7  | 1.99 | MultipleMeltPeaks            |
| qacH-02        | 30B | 34.26 | 83.93 | 1.82 |                              |
| qnrA           | 30B |       |       |      | CurveFitFailed               |

|              |     |       |       |      |                             |
|--------------|-----|-------|-------|------|-----------------------------|
| rarD-02      | 30B | 35.84 | 85.85 | 1.89 |                             |
| sat4         | 30B |       |       |      | LowEfficiency, CtIsSmall, S |
| sdeB         | 30B | 30.26 | 85.85 | 1.96 |                             |
| spcN-01      | 30B |       |       |      | CurveFitFailed              |
| speA         | 30B |       |       |      | NoAmplification             |
| str          | 30B |       |       |      | LowEfficiency, CtIsSmall, S |
| strA         | 30B |       |       |      | LowEfficiency, CtIsSmall, C |
| strB         | 30B | 31.08 | 79.58 | 1.96 |                             |
| sul1         | 30B | 35.24 | 86.35 | 1.76 |                             |
| sul2         | 30B |       |       |      | CurveFitFailed              |
| sulA/foIP-01 | 30B | 21.32 | 81.84 | 2.01 |                             |
| sulA/foIP-03 | 30B | 19.99 | 82.63 | 2.02 |                             |
| tet(32)      | 30B |       |       |      | LowEfficiency, CtIsSmall, C |
| tet(34)      | 30B | 36.25 | 74.33 | 1.89 |                             |
| tet(35)      | 30B |       |       |      | NoAmplification             |
| tet(36)-A    | 30B |       |       |      | CurveFitFailed              |
| tet(36)-B    | 30B |       |       |      | LowEfficiency, CtIsSmall, S |
| tet(37)      | 30B | 32.78 | 91.11 | 1.96 | MultipleMeltPeaks           |
| tetA-01      | 30B | 30.3  | 85.06 | 2.01 |                             |
| tetA-02      | 30B | 28.74 | 87.97 | 1.9  |                             |
| tetB-01      | 30B | 32.41 | 87.54 | 1.98 | MultipleMeltPeaks           |
| tetB-02      | 30B | 33.97 | 74.28 | 2.02 |                             |
| tetC-01      | 30B |       |       |      | NoAmplification             |
| tetC-02      | 30B | 36.96 | 75.91 | 1.9  |                             |
| tetD-01      | 30B |       |       |      | LowEfficiency, CtIsSmall, S |
| tetD-02      | 30B | 30    | 85.89 | 1.98 |                             |
| tetE         | 30B |       |       |      | CurveFitFailed              |
| tetG-01      | 30B | 33.61 | 86.01 | 2.06 |                             |
| tetG-02      | 30B | 32.34 | 88.31 | 1.84 |                             |
| tetH         | 30B |       |       |      | LowEfficiency, CtIsSmall, S |
| tetJ         | 30B |       |       |      | CurveFitFailed              |
| tetK         | 30B |       |       |      | CurveFitFailed              |
| tetL-01      | 30B |       |       |      | LowEfficiency, CtIsSmall, C |
| tetL-02      | 30B |       |       |      | BadR2, LowEfficiency, CtIsS |
| tetM-01      | 30B | 19.46 | 76.16 | 2.03 |                             |
| tetM-02      | 30B | 19.64 | 78.28 | 2.09 |                             |
| tetO-01      | 30B |       |       |      | LowEfficiency, CtIsSmall, S |
| tetPA        | 30B |       |       |      | LowEfficiency, CtIsSmall, S |
| tetPB-01     | 30B |       |       |      | LowEfficiency, CtIsSmall, S |
| tetPB-02     | 30B | 29.48 | 85.36 | 2.13 |                             |
| tetPB-03     | 30B |       |       |      | LowEfficiency, CtIsSmall, S |
| tetPB-05     | 30B |       |       |      | LowEfficiency, CtIsSmall, S |
| tetQ         | 30B |       |       |      | CurveFitFailed              |
| tetR-02      | 30B | 31.51 | 89.22 | 1.59 |                             |
| tetR-03      | 30B |       |       |      | CurveFitFailed              |
| tetS         | 30B |       |       |      | CurveFitFailed              |

|             |     |       |       |      |                              |
|-------------|-----|-------|-------|------|------------------------------|
| tetT        | 30B | 30.84 | 75.71 | 2.11 |                              |
| tetU-01     | 30B |       |       |      | LowEfficiency, CtIsSmall, Ci |
| tetV        | 30B |       |       |      | CurveFitFailed               |
| tetW-01     | 30B |       |       |      | LowEfficiency, CtIsSmall, S: |
| tetX        | 30B |       |       |      | CurveFitFailed               |
| tnpA-01     | 30B |       |       |      | LowEfficiency, CtIsSmall, S: |
| tnpA-02     | 30B | 34.51 | 84.64 | 1.81 | MultipleMeltPeaks            |
| tnpA-03     | 30B | 31.85 | 84.04 | 2.04 | MultipleMeltPeaks            |
| tnpA-04     | 30B |       |       |      | LowEfficiency, CtIsSmall, S: |
| tnpA-05     | 30B |       |       |      | LowEfficiency, CtIsSmall, S: |
| tnpA-07     | 30B |       |       |      | LowEfficiency, CtIsSmall, Ci |
| tolC-01     | 30B |       |       |      | LowEfficiency, CtIsSmall, S: |
| tolC-02     | 30B | 30.04 | 85.48 | 1.95 | MultipleMeltPeaks            |
| tolC-03     | 30B | 30.24 | 86.95 | 1.99 | MultipleMeltPeaks            |
| Tp614       | 30B |       |       |      | CurveFitFailed               |
| ttgA        | 30B |       |       |      | CurveFitFailed               |
| ttgB        | 30B | 35.09 | 83.92 | 1.94 |                              |
| vanA        | 30B |       |       |      | LowEfficiency, CtIsSmall, S: |
| vanB-01     | 30B | 33.06 | 84.32 | 2.02 | MultipleMeltPeaks            |
| vanC-01     | 30B | 37.11 | 77.66 | 1.87 |                              |
| vanC-02     | 30B |       |       |      | CurveFitFailed               |
| vanC-03     | 30B | 25.58 | 85.87 | 1.96 | MultipleMeltPeaks            |
| vanC1       | 30B |       |       |      | LowEfficiency, CtIsSmall, Ci |
| vanC2/vanC3 | 30B | 33.81 | 85    | 2.04 |                              |
| vanG        | 30B |       |       |      | BadR2, CtIsSmall, Saturatio  |
| vanHB       | 30B | 35.99 | 78.16 | 1.88 | MultipleMeltPeaks            |
| vanHD       | 30B | 32.82 | 86.02 | 1.93 |                              |
| vanRA-01    | 30B |       |       |      | LowEfficiency, CtIsSmall, Ci |
| vanRA-02    | 30B |       |       |      | LowEfficiency, CtIsSmall, Ci |
| vanRB       | 30B |       |       |      | LowEfficiency, CtIsSmall, Ci |
| vanRC       | 30B |       |       |      | LowEfficiency, CtIsSmall, Ci |
| vanRC4      | 30B |       |       |      | CurveFitFailed               |
| vanRD       | 30B |       |       |      | LowEfficiency, CtIsSmall, Ci |
| vanSA       | 30B |       |       |      | LowEfficiency, CtIsSmall, S: |
| vanSB       | 30B | 31.17 | 74.75 | 2.06 |                              |
| vanSC-01    | 30B | 33.45 | 84.6  | 2.03 |                              |
| vanSC-02    | 30B |       |       |      | NoAmplification              |
| vanTC-01    | 30B |       |       |      | CurveFitFailed               |
| vanTC-02    | 30B | 34.1  | 83.55 | 1.89 | MultipleMeltPeaks            |
| vanTE       | 30B |       |       |      | LowEfficiency, CtIsSmall, S: |
| vanTG       | 30B |       |       |      | CurveFitFailed               |
| vanWB       | 30B |       |       |      | LowEfficiency, CtIsSmall, S: |
| vanWG       | 30B | 36.88 | 74.23 | 1.92 |                              |
| vanXA       | 30B |       |       |      | CurveFitFailed               |
| vanXB       | 30B |       |       |      | LowEfficiency, CtIsSmall, S: |
| vanXD       | 30B | 31.27 | 76.07 | 2.05 |                              |

|              |     |       |       |      |                              |
|--------------|-----|-------|-------|------|------------------------------|
| vanYB        | 30B |       |       |      | LowEfficiency, CtIsSmall, S: |
| vanYD-01     | 30B | 31.07 | 82.72 | 1.78 | MultipleMeltPeaks            |
| vanYD-02     | 30B |       |       |      | LowEfficiency, CtIsSmall, S: |
| vatB-01      | 30B |       |       |      | CurveFitFailed               |
| vatB-02      | 30B |       |       |      | CurveFitFailed               |
| vatC-01      | 30B | 37.19 | 81.1  | 1.83 |                              |
| vatC-02      | 30B | 33.12 | 81.73 | 1.97 |                              |
| vatE-01      | 30B | 30.69 | 75.67 | 2.11 |                              |
| vatE-02      | 30B |       |       |      | NoAmplification              |
| vgaA-01      | 30B |       |       |      | LowEfficiency, CtIsSmall, S: |
| vgaA-02      | 30B |       |       |      | LowEfficiency, CtIsSmall, S: |
| vgb-01       | 30B | 33.72 | 77.25 | 1.94 |                              |
| vgbB-01      | 30B |       |       |      | CurveFitFailed               |
| vgbB-02      | 30B |       |       |      | LowEfficiency, CtIsSmall, S: |
| yceE/mdtG-0  | 30B |       |       |      | LowEfficiency, CtIsSmall, S: |
| yceE/mdtG-0  | 30B | 34.81 | 81.22 | 1.95 |                              |
| yceL/mdtH-0  | 30B | 31.4  | 84.34 | 1.93 | MultipleMeltPeaks            |
| yceL/mdtH-0  | 30B |       |       |      | CurveFitFailed               |
| yceL/mdtH-0  | 30B | 31.61 | 78.48 | 2.02 | MultipleMeltPeaks            |
| yidY/mdtL-01 | 30B | 30.82 | 88.39 | 1.99 |                              |
| yidY/mdtL-02 | 30B | 32.04 | 92.77 | 1.89 |                              |































| Assay           | Sample | Ct | Tm    | Efficiency | flag                   |
|-----------------|--------|----|-------|------------|------------------------|
| 16S rRNA        | 30C    |    | 14.14 | 82.48      | 1.99                   |
| aac             | 30C    |    | 36.39 | 78         | 1.91                   |
| aac(6')-Ib(akz) | 30C    |    |       |            | NoAmplification        |
| aac(6')-Ib(akz) | 30C    |    | 41.06 | 64.65      | 1.64 MultipleMeltPeaks |
| aac(6')-Ib(akz) | 30C    |    | 34.6  | 77.32      | 1.95 MultipleMeltPeaks |
| aac(6')-II      | 30C    |    |       |            | NoAmplification        |
| aac(6')I1       | 30C    |    |       |            | NoAmplification        |
| aacA/aphD       | 30C    |    |       |            | NoAmplification        |
| aacC            | 30C    |    | 36.66 | 77.66      | 1.77 MultipleMeltPeaks |
| aacC1           | 30C    |    |       |            | NoAmplification        |
| aacC2           | 30C    |    |       |            | NoAmplification        |
| aacC4           | 30C    |    |       |            | NoAmplification        |
| aadA-01         | 30C    |    | 34.3  | 82.48      | 1.94                   |
| aadA-02         | 30C    |    | 30.6  | 82.21      | 1.96                   |
| aadA-1-01       | 30C    |    |       |            | NoAmplification        |
| aadA-1-02       | 30C    |    |       |            | NoAmplification        |
| aadA1           | 30C    |    | 30.53 | 79.97      | 1.99                   |
| aadA2-01        | 30C    |    |       |            | NoAmplification        |
| aadA2-02        | 30C    |    |       |            | NoAmplification        |
| aadA2-03        | 30C    |    |       |            | NoAmplification        |
| aadA5-01        | 30C    |    |       |            | NoAmplification        |
| aadA5-02        | 30C    |    |       |            | NoAmplification        |
| aadA9-01        | 30C    |    |       |            | CurveFitFailed         |
| aadA9-02        | 30C    |    | 30.27 | 77.37      | 2.06                   |
| aadD            | 30C    |    |       |            | CurveFitFailed         |
| aadE            | 30C    |    |       |            | NoAmplification        |
| acrA-01         | 30C    |    | 27.26 | 82.64      | 1.93                   |
| acrA-02         | 30C    |    | 29.71 | 83.28      | 1.88                   |
| acrA-03         | 30C    |    | 38.73 | 88.97      | 1.65 MultipleMeltPeaks |
| acrA-04         | 30C    |    | 35.65 | 82.99      | 1.83 MultipleMeltPeaks |
| acrA-05         | 30C    |    | 29.49 | 86.42      | 1.98                   |
| acrB-01         | 30C    |    | 27.43 | 82.13      | 2                      |
| acrF            | 30C    |    | 26.41 | 82.76      | 1.91                   |
| acrR-01         | 30C    |    |       |            | CurveFitFailed         |
| acrR-02         | 30C    |    | 28.52 | 80.75      | 1.97                   |
| Actin           | 30C    |    | 23.92 | 87.42      | 1.92                   |
| adeA            | 30C    |    | 37.54 | 62.09      | 1.99 MultipleMeltPeaks |
| ampC-01         | 30C    |    | 34.17 | 80.1       | 1.98                   |
| ampC-02         | 30C    |    | 28.39 | 82.18      | 1.92                   |
| ampC-04         | 30C    |    | 38.52 | 81.44      | 1.83 MultipleMeltPeaks |
| ampC-05         | 30C    |    |       |            | NoAmplification        |
| ampC-06         | 30C    |    |       |            | NoAmplification        |
| ampC-07         | 30C    |    |       |            | NoAmplification        |
| ampC-09         | 30C    |    |       |            | NoAmplification        |
| ampC/blaDH      | 30C    |    | 36.98 | 84.43      | 1.8                    |

|                            |     |       |       |      |                   |
|----------------------------|-----|-------|-------|------|-------------------|
| aph                        | 30C |       |       |      | NoAmplification   |
| aph(2')-Id-01              | 30C |       |       |      | NoAmplification   |
| aph(2')-Id-02              | 30C |       |       |      | NoAmplification   |
| aph6ia                     | 30C | 27.57 | 78.22 | 2.01 |                   |
| aphA1(aka k <sub>z</sub> ) | 30C | 27.87 | 76.71 | 2.07 |                   |
| bacA-01                    | 30C | 34.52 | 75.09 | 1.95 |                   |
| bacA-02                    | 30C | 26.54 | 82.32 | 1.92 |                   |
| BETA-globin                | 30C | 24.83 | 84.5  | 1.96 |                   |
| bla-ACC-1                  | 30C |       |       |      | CurveFitFailed    |
| bla-L1                     | 30C | 35.22 | 85.15 | 1.89 |                   |
| bla1                       | 30C |       |       |      | CurveFitFailed    |
| blaCMY                     | 30C | 35.53 | 81.11 | 1.89 |                   |
| blaCMY2-01                 | 30C | 36.69 | 80.85 | 1.9  |                   |
| blaCMY2-02                 | 30C | 36.35 | 82.72 | 1.87 |                   |
| blaCTX-M-01                | 30C | 31.67 | 87.77 | 1.55 |                   |
| blaCTX-M-02                | 30C |       |       |      | NoAmplification   |
| blaCTX-M-03                | 30C |       |       |      | NoAmplification   |
| blaCTX-M-04                | 30C | 38.36 | 87.25 | 1.8  | MultipleMeltPeaks |
| blaCTX-M-05                | 30C | 35.29 | 75.79 | 1.68 | MultipleMeltPeaks |
| blaCTX-M-06                | 30C | 38.31 | 77.48 | 1.85 |                   |
| blaGES                     | 30C |       |       |      | NoAmplification   |
| blaIMP-01                  | 30C |       |       |      | NoAmplification   |
| blaIMP-02                  | 30C |       |       |      | NoAmplification   |
| blaMOX/blaC                | 30C |       |       |      | NoAmplification   |
| blaOCH                     | 30C |       |       |      | NoAmplification   |
| blaOKP                     | 30C |       |       |      | NoAmplification   |
| blaOXA1/blaC               | 30C |       |       |      | NoAmplification   |
| blaOXA10-01                | 30C |       |       |      | NoAmplification   |
| blaOXA10-02                | 30C |       |       |      | CurveFitFailed    |
| blaOXY                     | 30C | 40.47 | 64.69 | 1.49 | MultipleMeltPeaks |
| blaPAO                     | 30C | 35.89 | 91.12 | 1.71 |                   |
| blaPER                     | 30C |       |       |      | NoAmplification   |
| blaPSE                     | 30C |       |       |      | NoAmplification   |
| blaROB                     | 30C |       |       |      | NoAmplification   |
| blaSFO                     | 30C | 37.51 | 62.16 | 1.94 | MultipleMeltPeaks |
| blaSHV-01                  | 30C |       |       |      | NoAmplification   |
| blaSHV-02                  | 30C |       |       |      | NoAmplification   |
| blaTEM                     | 30C | 23.33 | 79.52 | 1.74 |                   |
| blaTLA                     | 30C |       |       |      | NoAmplification   |
| blaVEB                     | 30C |       |       |      | NoAmplification   |
| blaVIM                     | 30C | 38.1  | 87.87 | 1.75 |                   |
| blaZ                       | 30C |       |       |      | NoAmplification   |
| carB                       | 30C | 38.74 | 78.85 | 1.79 | MultipleMeltPeaks |
| catA1                      | 30C |       |       |      | NoAmplification   |
| catB3                      | 30C |       |       |      | NoAmplification   |
| catB8                      | 30C | 34.13 | 79.55 | 1.94 | MultipleMeltPeaks |

|            |     |       |       |      |                              |
|------------|-----|-------|-------|------|------------------------------|
| ceoA       | 30C | 30.97 | 88    | 1.94 | MultipleMeltPeaks            |
| cepA       | 30C |       |       |      | NoAmplification              |
| cfiA       | 30C | 36.83 | 86.39 | 1.86 |                              |
| cfr        | 30C |       |       |      | NoAmplification              |
| cfxA       | 30C | 22.6  | 78.25 | 2.07 |                              |
| cmeA       | 30C |       |       |      | CurveFitFailed               |
| cmlA1-01   | 30C | 35.57 | 88.66 | 1.89 |                              |
| cmlA1-02   | 30C | 38.48 | 62.17 | 1.86 | MultipleMeltPeaks            |
| cmr        | 30C |       |       |      | NoAmplification              |
| cmx(A)     | 30C | 32.24 | 83.09 | 1.92 |                              |
| cphA-01    | 30C | 32.72 | 90.87 | 1.91 |                              |
| cphA-02    | 30C | 39.17 | 62.33 | 1.77 | MultipleMeltPeaks            |
| dfrA1      | 30C | 38.69 | 61.78 | 1.76 | MultipleMeltPeaks            |
| dfrA12     | 30C | 38.48 | 86.35 | 1.62 |                              |
| emrD       | 30C |       |       |      | NoAmplification              |
| ereA       | 30C |       |       |      | NoAmplification              |
| ereB       | 30C |       |       |      | NoAmplification              |
| erm(34)    | 30C | 39.79 | 85.97 | 1.77 | MultipleMeltPeaks            |
| erm(35)    | 30C |       |       |      | NoAmplification              |
| erm(36)    | 30C | 33.82 | 78.35 | 2.09 |                              |
| ermA       | 30C |       |       |      | NoAmplification              |
| ermA/ermTR | 30C |       |       |      | NoAmplification              |
| ermB       | 30C |       |       |      | NoAmplification              |
| ermC       | 30C | 32.92 | 75.3  | 1.94 |                              |
| ermF       | 30C |       |       |      | NoAmplification              |
| ermJ/ermD  | 30C |       |       |      | NoAmplification              |
| ermK-01    | 30C | 30.24 | 75.86 | 2.02 |                              |
| ermK-02    | 30C |       |       |      | NoAmplification              |
| ermT-01    | 30C |       |       |      | NoAmplification              |
| ermT-02    | 30C |       |       |      | NoAmplification              |
| ermX       | 30C | 37.74 | 84.27 | 1.76 | MultipleMeltPeaks            |
| ermY       | 30C |       |       |      | NoAmplification              |
| fabK       | 30C | 30.17 | 79.33 | 2.05 |                              |
| floR       | 30C |       |       |      | NoAmplification              |
| folA       | 30C |       |       |      | NoAmplification              |
| fosB       | 30C |       |       |      | LowEfficiency, CtIsSmall, S: |
| fosX       | 30C |       |       |      | NoAmplification              |
| fox5       | 30C | 30.53 | 88.55 | 1.97 |                              |
| imiR       | 30C |       |       |      | NoAmplification              |
| ImrA-01    | 30C |       |       |      | NoAmplification              |
| intl       | 30C | 31.74 | 84.41 | 1.98 | MultipleMeltPeaks            |
| intl1      | 30C | 23.28 | 86.98 | 1.97 | MultipleMeltPeaks            |
| IS613      | 30C | 19.16 | 79.88 | 2.09 |                              |
| lnuA-01    | 30C |       |       |      | NoAmplification              |
| lnuB-01    | 30C |       |       |      | NoAmplification              |
| lnuB-02    | 30C |       |       |      | NoAmplification              |

|               |     |       |       |      |                   |
|---------------|-----|-------|-------|------|-------------------|
| lnuC          | 30C |       |       |      | CurveFitFailed    |
| marR-01       | 30C | 35.14 | 88.09 | 1.9  |                   |
| matA/mel      | 30C | 17.18 | 77.72 | 2.08 |                   |
| mdet1         | 30C |       |       |      | NoAmplification   |
| mdtA          | 30C | 38.11 | 62.17 | 1.86 | MultipleMeltPeaks |
| mdtE/yhiU     | 30C | 28.55 | 80.99 | 1.89 |                   |
| mecA          | 30C |       |       |      | NoAmplification   |
| mefA          | 30C | 16.52 | 80.48 | 2.01 |                   |
| mepA          | 30C | 32.78 | 85.32 | 1.96 |                   |
| mexA          | 30C | 31.84 | 91.03 | 1.95 |                   |
| mexD          | 30C |       |       |      | NoAmplification   |
| mexE          | 30C |       |       |      | NoAmplification   |
| mexF          | 30C | 32.12 | 84.96 | 1.83 | MultipleMeltPeaks |
| mphA-01       | 30C | 25.98 | 87.47 | 1.91 |                   |
| mphA-02       | 30C | 27.78 | 90.74 | 2.11 |                   |
| mphB          | 30C | 34.3  | 85.11 | 1.91 |                   |
| mphC          | 30C |       |       |      | NoAmplification   |
| msrA-01       | 30C |       |       |      | NoAmplification   |
| msrC-01       | 30C |       |       |      | NoAmplification   |
| mtrC-01       | 30C | 39.36 | 85.88 | 1.79 | MultipleMeltPeaks |
| mtrC-02       | 30C |       |       |      | NoAmplification   |
| mtrD-02       | 30C | 32.01 | 81.56 | 1.99 |                   |
| mtrD-03       | 30C |       |       |      | NoAmplification   |
| NDM1          | 30C |       |       |      | NoAmplification   |
| nimE          | 30C |       |       |      | NoAmplification   |
| nisB          | 30C |       |       |      | NoAmplification   |
| oleC          | 30C | 38.08 | 90.02 | 1.69 | MultipleMeltPeaks |
| oprD          | 30C | 31.29 | 88.73 | 1.97 |                   |
| oprJ          | 30C | 31    | 86.1  | 1.97 |                   |
| pbp           | 30C |       |       |      | NoAmplification   |
| pbp2x         | 30C |       |       |      | NoAmplification   |
| Pbp5          | 30C |       |       |      | NoAmplification   |
| penA          | 30C |       |       |      | NoAmplification   |
| pikR1         | 30C |       |       |      | NoAmplification   |
| pikR2         | 30C | 37.03 | 89.49 | 1.72 | MultipleMeltPeaks |
| pmrA          | 30C | 20.49 | 79.6  | 2.07 |                   |
| pncA          | 30C | 34.47 | 91.5  | 1.78 |                   |
| putative muli | 30C |       |       |      | NoAmplification   |
| qac           | 30C |       |       |      | CurveFitFailed    |
| qacA          | 30C | 37.37 | 70.36 | 1.78 |                   |
| qacA/qacB     | 30C |       |       |      | NoAmplification   |
| qacEdelta1-0  | 30C |       |       |      | NoAmplification   |
| qacEdelta1-0  | 30C | 30.25 | 81.22 | 1.97 |                   |
| qacH-01       | 30C | 30.54 | 80.11 | 1.95 |                   |
| qacH-02       | 30C |       |       |      | NoAmplification   |
| qnrA          | 30C |       |       |      | NoAmplification   |



|              |     |       |       |      |                   |
|--------------|-----|-------|-------|------|-------------------|
| rarD-02      | 30C | 29.64 | 80.11 | 1.98 |                   |
| sat4         | 30C |       |       |      | NoAmplification   |
| sdeB         | 30C |       |       |      | CurveFitFailed    |
| spcN-01      | 30C |       |       |      | NoAmplification   |
| speA         | 30C |       |       |      | NoAmplification   |
| str          | 30C |       |       |      | NoAmplification   |
| strA         | 30C |       |       |      | NoAmplification   |
| strB         | 30C | 29.05 | 84.06 | 1.94 |                   |
| sul1         | 30C |       |       |      | NoAmplification   |
| sul2         | 30C |       |       |      | NoAmplification   |
| sulA/foIP-01 | 30C | 20.7  | 81.55 | 1.99 |                   |
| sulA/foIP-03 | 30C | 18.93 | 83.64 | 2.02 |                   |
| tet(32)      | 30C |       |       |      | NoAmplification   |
| tet(34)      | 30C | 35.64 | 74.72 | 1.92 |                   |
| tet(35)      | 30C |       |       |      | NoAmplification   |
| tet(36)-A    | 30C | 38.07 | 81.82 | 1.96 | MultipleMeltPeaks |
| tet(36)-B    | 30C |       |       |      | NoAmplification   |
| tet(37)      | 30C | 22.47 | 76.72 | 2.02 |                   |
| tetA-01      | 30C | 38.71 | 85.12 | 1.76 | MultipleMeltPeaks |
| tetA-02      | 30C | 29.44 | 82.33 | 1.97 |                   |
| tetB-01      | 30C |       |       |      | CurveFitFailed    |
| tetB-02      | 30C | 38.91 | 74.63 | 1.79 |                   |
| tetC-01      | 30C |       |       |      | NoAmplification   |
| tetC-02      | 30C |       |       |      | NoAmplification   |
| tetD-01      | 30C |       |       |      | NoAmplification   |
| tetD-02      | 30C | 39.53 | 85.62 | 1.7  | MultipleMeltPeaks |
| tetE         | 30C |       |       |      | NoAmplification   |
| tetG-01      | 30C | 34.05 | 80.63 | 2.03 |                   |
| tetG-02      | 30C | 36.83 | 88.33 | 1.76 |                   |
| tetH         | 30C |       |       |      | NoAmplification   |
| tetJ         | 30C |       |       |      | NoAmplification   |
| tetK         | 30C |       |       |      | NoAmplification   |
| tetL-01      | 30C |       |       |      | NoAmplification   |
| tetL-02      | 30C |       |       |      | CurveFitFailed    |
| tetM-01      | 30C | 20.29 | 76.29 | 2.01 |                   |
| tetM-02      | 30C | 20.76 | 78.33 | 2.05 |                   |
| tetO-01      | 30C | 22.32 | 77.44 | 2.05 |                   |
| tetPA        | 30C |       |       |      | NoAmplification   |
| tetPB-01     | 30C |       |       |      | NoAmplification   |
| tetPB-02     | 30C | 36.54 | 85.29 | 1.85 |                   |
| tetPB-03     | 30C |       |       |      | NoAmplification   |
| tetPB-05     | 30C |       |       |      | NoAmplification   |
| tetQ         | 30C |       |       |      | NoAmplification   |
| tetR-02      | 30C | 31.57 | 79.94 | 1.7  | MultipleMeltPeaks |
| tetR-03      | 30C |       |       |      | NoAmplification   |
| tetS         | 30C |       |       |      | NoAmplification   |

|             |     |       |       |      |                   |
|-------------|-----|-------|-------|------|-------------------|
| tetT        | 30C |       |       |      | NoAmplification   |
| tetU-01     | 30C |       |       |      | NoAmplification   |
| tetV        | 30C | 35.23 | 79.26 | 1.92 |                   |
| tetW-01     | 30C |       |       |      | NoAmplification   |
| tetX        | 30C |       |       |      | NoAmplification   |
| tnpA-01     | 30C |       |       |      | CurveFitFailed    |
| tnpA-02     | 30C | 37.81 | 85.67 | 1.98 | MultipleMeltPeaks |
| tnpA-03     | 30C | 25.63 | 78.26 | 2.04 |                   |
| tnpA-04     | 30C | 30.24 | 82.37 | 1.95 | MultipleMeltPeaks |
| tnpA-05     | 30C | 26.66 | 81.1  | 1.92 |                   |
| tnpA-07     | 30C |       |       |      | NoAmplification   |
| tolC-01     | 30C | 28.07 | 78.78 | 1.97 |                   |
| tolC-02     | 30C | 28.67 | 83.18 | 1.94 |                   |
| tolC-03     | 30C | 28.81 | 81.37 | 1.93 |                   |
| Tp614       | 30C |       |       |      | NoAmplification   |
| ttgA        | 30C | 38.82 | 69.2  | 1.71 | MultipleMeltPeaks |
| ttgB        | 30C | 33.3  | 85.87 | 2.07 |                   |
| vanA        | 30C |       |       |      | NoAmplification   |
| vanB-01     | 30C | 33.96 | 83.44 | 1.95 |                   |
| vanC-01     | 30C |       |       |      | NoAmplification   |
| vanC-02     | 30C |       |       |      | NoAmplification   |
| vanC-03     | 30C | 29.22 | 91.98 | 1.98 |                   |
| vanC1       | 30C |       |       |      | NoAmplification   |
| vanC2/vanC3 | 30C | 42.3  | 85.48 | 1.73 |                   |
| vanG        | 30C |       |       |      | NoAmplification   |
| vanHB       | 30C | 35.82 | 83.96 | 1.88 |                   |
| vanHD       | 30C |       |       |      | NoAmplification   |
| vanRA-01    | 30C |       |       |      | NoAmplification   |
| vanRA-02    | 30C |       |       |      | NoAmplification   |
| vanRB       | 30C |       |       |      | NoAmplification   |
| vanRC       | 30C |       |       |      | NoAmplification   |
| vanRC4      | 30C |       |       |      | NoAmplification   |
| vanRD       | 30C |       |       |      | NoAmplification   |
| vanSA       | 30C |       |       |      | NoAmplification   |
| vanSB       | 30C | 32.31 | 74.53 | 2.03 |                   |
| vanSC-01    | 30C | 37.83 | 78.32 | 1.83 | MultipleMeltPeaks |
| vanSC-02    | 30C |       |       |      | NoAmplification   |
| vanTC-01    | 30C |       |       |      | NoAmplification   |
| vanTC-02    | 30C | 38.46 | 86.82 | 1.66 | MultipleMeltPeaks |
| vanTE       | 30C |       |       |      | NoAmplification   |
| vanTG       | 30C |       |       |      | NoAmplification   |
| vanWB       | 30C |       |       |      | NoAmplification   |
| vanWG       | 30C |       |       |      | NoAmplification   |
| vanXA       | 30C |       |       |      | CurveFitFailed    |
| vanXB       | 30C |       |       |      | NoAmplification   |
| vanXD       | 30C | 31.69 | 75.69 | 2.05 |                   |

|              |     |       |       |      |                   |
|--------------|-----|-------|-------|------|-------------------|
| vanYB        | 30C |       |       |      | NoAmplification   |
| vanYD-01     | 30C | 38.47 | 89.83 | 1.75 | MultipleMeltPeaks |
| vanYD-02     | 30C |       |       |      | NoAmplification   |
| vatB-01      | 30C |       |       |      | NoAmplification   |
| vatB-02      | 30C |       |       |      | CurveFitFailed    |
| vatC-01      | 30C |       |       |      | CurveFitFailed    |
| vatC-02      | 30C |       |       |      | CurveFitFailed    |
| vatE-01      | 30C | 32.66 | 75.39 | 2.01 |                   |
| vatE-02      | 30C |       |       |      | NoAmplification   |
| vgaA-01      | 30C |       |       |      | NoAmplification   |
| vgaA-02      | 30C |       |       |      | NoAmplification   |
| vgb-01       | 30C | 39.97 | 75.01 | 1.8  |                   |
| vgbB-01      | 30C |       |       |      | NoAmplification   |
| vgbB-02      | 30C |       |       |      | NoAmplification   |
| yceE/mdtG-0  | 30C | 28.35 | 81.54 | 2.02 |                   |
| yceE/mdtG-0  | 30C |       |       |      | NoAmplification   |
| yceL/mdtH-0  | 30C | 33.97 | 87.94 | 1.9  |                   |
| yceL/mdtH-0  | 30C | 28.79 | 83.17 | 1.96 |                   |
| yceL/mdtH-0  | 30C | 29.19 | 79.12 | 1.95 |                   |
| yidY/mdtL-01 | 30C | 37.99 | 87.55 | 1.78 | MultipleMeltPeaks |
| yidY/mdtL-02 | 30C | 28.18 | 80.21 | 1.97 |                   |































| Assay           | Sample | Ct | Tm    | Efficiency | flag                        |
|-----------------|--------|----|-------|------------|-----------------------------|
| 16S rRNA        | 31A    |    | 13.5  | 82.36      | 2.15                        |
| aac             | 31A    |    | 31.47 | 88.41      | 1.97 MultipleMeltPeaks      |
| aac(6')-Ib(akz) | 31A    |    |       |            | LowEfficiency, CtIsSmall, S |
| aac(6')-Ib(akz) | 31A    |    | 31.81 | 80.37      | 1.95 MultipleMeltPeaks      |
| aac(6')-Ib(akz) | 31A    |    | 39.35 | 76.71      | 1.71 MultipleMeltPeaks      |
| aac(6')-II      | 31A    |    | 35.98 | 83.51      | 1.55 MultipleMeltPeaks      |
| aac(6')I1       | 31A    |    |       |            | LowEfficiency, CtIsSmall, C |
| aacA/aphD       | 31A    |    |       |            | LowEfficiency, CtIsSmall, S |
| aacC            | 31A    |    | 28.66 | 88.09      | 1.92 MultipleMeltPeaks      |
| aacC1           | 31A    |    | 37.63 | 81.56      | 1.89                        |
| aacC2           | 31A    |    |       |            | NoAmplification             |
| aacC4           | 31A    |    | 30.36 | 90.76      | 1.92                        |
| aadA-01         | 31A    |    |       |            | CurveFitFailed              |
| aadA-02         | 31A    |    | 35.82 | 80.61      | 1.9                         |
| aadA-1-01       | 31A    |    | 35.83 | 81.44      | 1.82                        |
| aadA-1-02       | 31A    |    |       |            | LowEfficiency, CtIsSmall, S |
| aadA1           | 31A    |    | 34    | 83.81      | 1.91                        |
| aadA2-01        | 31A    |    | 36.64 | 88.31      | 1.71 MultipleMeltPeaks      |
| aadA2-02        | 31A    |    | 31.85 | 75.48      | 1.98                        |
| aadA2-03        | 31A    |    |       |            | LowEfficiency, CtIsSmall, C |
| aadA5-01        | 31A    |    | 34.32 | 88.79      | 1.88                        |
| aadA5-02        | 31A    |    | 30.96 | 88.6       | 2.01                        |
| aadA9-01        | 31A    |    |       |            | BadR2, LowEfficiency, CtIsS |
| aadA9-02        | 31A    |    | 35.03 | 79.08      | 1.91                        |
| aadD            | 31A    |    |       |            | CurveFitFailed              |
| aadE            | 31A    |    |       |            | LowEfficiency, CtIsSmall, S |
| acrA-01         | 31A    |    | 19.86 | 83.18      | 1.96                        |
| acrA-02         | 31A    |    | 34.71 | 88.61      | 1.82                        |
| acrA-03         | 31A    |    | 37.13 | 89.1       | 1.73 MultipleMeltPeaks      |
| acrA-04         | 31A    |    | 29.22 | 88.17      | 1.99                        |
| acrA-05         | 31A    |    | 30.22 | 80.29      | 1.87 MultipleMeltPeaks      |
| acrB-01         | 31A    |    | 34.78 | 84.46      | 1.87                        |
| acrF            | 31A    |    | 31.71 | 84.87      | 2.02 MultipleMeltPeaks      |
| acrR-01         | 31A    |    |       |            | BadR2, LowEfficiency, CtIsS |
| acrR-02         | 31A    |    | 37.49 | 87.34      | 1.78 MultipleMeltPeaks      |
| Actin           | 31A    |    | 21.95 | 87.12      | 1.93 MultipleMeltPeaks      |
| adeA            | 31A    |    |       |            | LowEfficiency, CtIsSmall, C |
| ampC-01         | 31A    |    | 29.62 | 87.83      | 2                           |
| ampC-02         | 31A    |    | 33.01 | 89.13      | 1.87                        |
| ampC-04         | 31A    |    | 30.56 | 78.87      | 1.79 MultipleMeltPeaks      |
| ampC-05         | 31A    |    |       |            | CurveFitFailed              |
| ampC-06         | 31A    |    |       |            | CurveFitFailed              |
| ampC-07         | 31A    |    | 34.14 | 82.39      | 1.85 MultipleMeltPeaks      |
| ampC-09         | 31A    |    | 33.68 | 91.11      | 1.76                        |
| ampC/blaDH      | 31A    |    | 30.79 | 84.01      | 2.01 MultipleMeltPeaks      |

|                          |     |       |       |      |                              |
|--------------------------|-----|-------|-------|------|------------------------------|
| aph                      | 31A |       |       |      | LowEfficiency, CtIsSmall, S: |
| aph(2')-Id-01            | 31A |       |       |      | LowEfficiency, CtIsSmall, S: |
| aph(2')-Id-02            | 31A |       |       |      | CurveFitFailed               |
| aph6ia                   | 31A | 27.85 | 78.45 | 1.94 |                              |
| aphA1(aka k <sub>a</sub> | 31A |       |       |      | LowEfficiency, CtIsSmall, S: |
| bacA-01                  | 31A |       |       |      | CurveFitFailed               |
| bacA-02                  | 31A | 34.78 | 88.26 | 1.77 |                              |
| BETA-globin              | 31A | 22.56 | 84.03 | 1.99 | MultipleMeltPeaks            |
| bla-ACC-1                | 31A | 35.44 | 86.18 | 1.82 |                              |
| bla-L1                   | 31A | 31.08 | 86.39 | 1.95 |                              |
| bla1                     | 31A |       |       |      | CurveFitFailed               |
| blaCMY                   | 31A | 31.47 | 80.7  | 1.89 |                              |
| blaCMY2-01               | 31A | 35.75 | 81.34 | 1.84 | MultipleMeltPeaks            |
| blaCMY2-02               | 31A | 28.67 | 83.13 | 2.02 | MultipleMeltPeaks            |
| blaCTX-M-01              | 31A | 37.17 | 79.54 | 1.79 | MultipleMeltPeaks            |
| blaCTX-M-02              | 31A | 28.57 | 80.85 | 1.93 | MultipleMeltPeaks            |
| blaCTX-M-03              | 31A |       |       |      | CurveFitFailed               |
| blaCTX-M-04              | 31A | 25.03 | 88.04 | 1.88 |                              |
| blaCTX-M-05              | 31A | 31.85 | 76.76 | 1.75 |                              |
| blaCTX-M-06              | 31A |       |       |      | CurveFitFailed               |
| blaGES                   | 31A |       |       |      | LowEfficiency, CtIsSmall, C: |
| blaIMP-01                | 31A |       |       |      | LowEfficiency, CtIsSmall, C: |
| blaIMP-02                | 31A |       |       |      | LowEfficiency, CtIsSmall, C: |
| blaMOX/blaC              | 31A |       |       |      | NoAmplification              |
| blaOCH                   | 31A |       |       |      | NoAmplification              |
| blaOKP                   | 31A |       |       |      | NoAmplification              |
| blaOXA1/blaC             | 31A |       |       |      | CurveFitFailed               |
| blaOXA10-01              | 31A | 29.97 | 76.59 | 2.1  |                              |
| blaOXA10-02              | 31A |       |       |      | LowEfficiency, CtIsSmall, S: |
| blaOXY                   | 31A | 30.58 | 88.65 | 1.8  |                              |
| blaPAO                   | 31A |       |       |      | NoAmplification              |
| blaPER                   | 31A | 34.11 | 78.29 | 1.66 |                              |
| blaPSE                   | 31A |       |       |      | LowEfficiency, CtIsSmall, C: |
| blaROB                   | 31A | 31.42 | 87.51 | 1.91 | MultipleMeltPeaks            |
| blaSFO                   | 31A | 28.73 | 86.78 | 1.89 | MultipleMeltPeaks            |
| blaSHV-01                | 31A | 31.64 | 88.96 | 1.95 |                              |
| blaSHV-02                | 31A |       |       |      | LowEfficiency, CtIsSmall, S: |
| blaTEM                   | 31A | 28.9  | 79.69 | 2.02 |                              |
| blaTLA                   | 31A |       |       |      | LowEfficiency, CtIsSmall, C: |
| blaVEB                   | 31A |       |       |      | CurveFitFailed               |
| blaVIM                   | 31A | 34.09 | 89.07 | 1.89 |                              |
| blaZ                     | 31A |       |       |      | LowEfficiency, CtIsSmall, S: |
| carB                     | 31A | 36.56 | 79.53 | 1.97 |                              |
| catA1                    | 31A |       |       |      | NoAmplification              |
| catB3                    | 31A |       |       |      | LowEfficiency, CtIsSmall, S: |
| catB8                    | 31A | 31.84 | 82.83 | 1.93 |                              |

|            |     |       |       |      |                              |
|------------|-----|-------|-------|------|------------------------------|
| ceoA       | 31A | 30.34 | 82.3  | 1.94 |                              |
| cepA       | 31A |       |       |      | CurveFitFailed               |
| cfiA       | 31A | 30.52 | 86.42 | 2.01 |                              |
| cfr        | 31A |       |       |      | LowEfficiency, CtIsSmall, S: |
| cfxA       | 31A | 23.5  | 77.61 | 2.05 |                              |
| cmeA       | 31A |       |       |      | CtIsSmall, CurveFitFailed, F |
| cmlA1-01   | 31A | 32.84 | 89.88 | 1.91 |                              |
| cmlA1-02   | 31A | 36.19 | 87.87 | 1.87 | MultipleMeltPeaks            |
| cmr        | 31A |       |       |      | CurveFitFailed               |
| cmx(A)     | 31A | 28.82 | 86.66 | 1.99 |                              |
| cphA-01    | 31A | 29.84 | 85.25 | 1.97 | MultipleMeltPeaks            |
| cphA-02    | 31A | 33.9  | 82.33 | 1.9  |                              |
| dfrA1      | 31A |       |       |      | LowEfficiency, CtIsSmall, C: |
| dfrA12     | 31A |       |       |      | CurveFitFailed               |
| emrD       | 31A | 30.57 | 89.05 | 1.87 |                              |
| ereA       | 31A |       |       |      | CurveFitFailed               |
| ereB       | 31A | 34.18 | 81.16 | 1.97 |                              |
| erm(34)    | 31A | 33.44 | 87.16 | 1.87 |                              |
| erm(35)    | 31A |       |       |      | LowEfficiency, CtIsSmall, C: |
| erm(36)    | 31A | 34.52 | 87.96 | 1.95 |                              |
| ermA       | 31A |       |       |      | LowEfficiency, CtIsSmall, S: |
| ermA/ermTR | 31A |       |       |      | NoAmplification              |
| ermB       | 31A | 16.82 | 75.07 | 2.19 |                              |
| ermC       | 31A | 28.33 | 75.86 | 2.09 |                              |
| ermF       | 31A | 30.45 | 72.1  | 2.07 |                              |
| ermJ/ermD  | 31A |       |       |      | LowEfficiency, CtIsSmall, S: |
| ermK-01    | 31A | 37.69 | 83.99 | 1.96 |                              |
| ermK-02    | 31A | 37.37 | 85.88 | 1.61 | MultipleMeltPeaks            |
| ermT-01    | 31A |       |       |      | LowEfficiency, CtIsSmall, S: |
| ermT-02    | 31A |       |       |      | LowEfficiency, CtIsSmall, S: |
| ermX       | 31A |       |       |      | CurveFitFailed               |
| ermY       | 31A |       |       |      | LowEfficiency, CtIsSmall, S: |
| fabK       | 31A | 21.35 | 78.66 | 2.19 |                              |
| floR       | 31A | 37.41 | 88.01 | 1.87 | MultipleMeltPeaks            |
| folA       | 31A | 37.49 | 82.01 | 1.7  |                              |
| fosB       | 31A |       |       |      | LowEfficiency, CtIsSmall, S: |
| fosX       | 31A |       |       |      | LowEfficiency, CtIsSmall, S: |
| fox5       | 31A | 23.45 | 86.5  | 1.92 | MultipleMeltPeaks            |
| imiR       | 31A |       |       |      | BadR2, LowEfficiency, CtIsS  |
| ImrA-01    | 31A | 34.56 | 82.7  | 1.94 |                              |
| intl       | 31A | 34.23 | 85.41 | 1.89 |                              |
| intl1      | 31A | 20.57 | 87.09 | 2.01 |                              |
| IS613      | 31A |       |       |      | CurveFitFailed               |
| lnuA-01    | 31A |       |       |      | CurveFitFailed               |
| lnuB-01    | 31A |       |       |      | CurveFitFailed               |
| lnuB-02    | 31A |       |       |      | LowEfficiency, CtIsSmall, S: |

|               |     |       |       |      |                             |
|---------------|-----|-------|-------|------|-----------------------------|
| lnuC          | 31A |       |       |      | LowEfficiency, CtIsSmall, S |
| marR-01       | 31A | 36.74 | 85.49 | 1.82 |                             |
| matA/mel      | 31A | 15.3  | 77.81 | 2.08 |                             |
| mdet1         | 31A |       |       |      | CurveFitFailed              |
| mdtA          | 31A |       |       |      | LowEfficiency, CtIsSmall, S |
| mdtE/yhiU     | 31A | 27.32 | 87.5  | 1.91 |                             |
| mecA          | 31A |       |       |      | LowEfficiency, CtIsSmall, S |
| mefA          | 31A | 14.76 | 80.64 | 2.26 | MultipleMeltPeaks           |
| mepA          | 31A | 25.36 | 85.37 | 1.97 | MultipleMeltPeaks           |
| mexA          | 31A |       |       |      | CurveFitFailed              |
| mexD          | 31A |       |       |      | CurveFitFailed              |
| mexE          | 31A | 35.65 | 80.32 | 1.86 | MultipleMeltPeaks           |
| mexF          | 31A | 26.17 | 87.46 | 2.08 |                             |
| mphA-01       | 31A | 31.21 | 88.82 | 1.99 |                             |
| mphA-02       | 31A | 27.97 | 90.35 | 2.22 |                             |
| mphB          | 31A |       |       |      | CurveFitFailed              |
| mphC          | 31A |       |       |      | CurveFitFailed              |
| msrA-01       | 31A |       |       |      | LowEfficiency, CtIsSmall, S |
| msrC-01       | 31A |       |       |      | NoAmplification             |
| mtrC-01       | 31A | 33.13 | 83.87 | 1.88 |                             |
| mtrC-02       | 31A | 32.55 | 84.45 | 1.95 |                             |
| mtrD-02       | 31A | 27.23 | 82.07 | 1.97 |                             |
| mtrD-03       | 31A | 26.48 | 85.5  | 1.91 | MultipleMeltPeaks           |
| NDM1          | 31A | 36.99 | 80.17 | 1.71 | MultipleMeltPeaks           |
| nimE          | 31A |       |       |      | LowEfficiency, CtIsSmall, S |
| nisB          | 31A |       |       |      | CurveFitFailed              |
| oleC          | 31A |       |       |      | CurveFitFailed              |
| oprD          | 31A | 24.28 | 91.97 | 1.83 |                             |
| oprJ          | 31A | 26.8  | 89.49 | 1.99 |                             |
| pbp           | 31A |       |       |      | LowEfficiency, CtIsSmall, S |
| pbp2x         | 31A |       |       |      | LowEfficiency, CtIsSmall, C |
| Pbp5          | 31A |       |       |      | LowEfficiency, CtIsSmall, S |
| penA          | 31A | 37.09 | 84.46 | 1.67 |                             |
| pikR1         | 31A |       |       |      | LowEfficiency, CtIsSmall, C |
| pikR2         | 31A | 29.81 | 85.09 | 2.12 |                             |
| pmrA          | 31A | 20.26 | 79.22 | 2.12 |                             |
| pncA          | 31A | 27.94 | 90.21 | 1.89 |                             |
| putative mult | 31A | 36.15 | 76.93 | 1.83 | MultipleMeltPeaks           |
| qac           | 31A |       |       |      | LowEfficiency, CtIsSmall, S |
| qacA          | 31A |       |       |      | LowEfficiency, CtIsSmall, S |
| qacA/qacB     | 31A | 38.02 | 84.71 | 1.51 | MultipleMeltPeaks           |
| qacEdelta1-0  | 31A |       |       |      | LowEfficiency, CtIsSmall, S |
| qacEdelta1-0  | 31A | 34.95 | 75.62 | 1.9  | MultipleMeltPeaks           |
| qacH-01       | 31A | 30.67 | 86.36 | 1.96 |                             |
| qacH-02       | 31A | 36.81 | 83.87 | 1.77 | MultipleMeltPeaks           |
| qnrA          | 31A | 30.58 | 83.11 | 1.97 |                             |

|              |     |       |       |      |                              |
|--------------|-----|-------|-------|------|------------------------------|
| rarD-02      | 31A | 32.84 | 84.14 | 1.93 |                              |
| sat4         | 31A |       |       |      | LowEfficiency, CtIsSmall, S: |
| sdeB         | 31A |       |       |      | LowEfficiency, CtIsSmall, S: |
| spcN-01      | 31A |       |       |      | CurveFitFailed               |
| speA         | 31A |       |       |      | CurveFitFailed               |
| str          | 31A |       |       |      | CurveFitFailed               |
| strA         | 31A |       |       |      | LowEfficiency, CtIsSmall, S: |
| strB         | 31A | 36.72 | 78.75 | 1.86 |                              |
| sul1         | 31A | 29.47 | 89.71 | 1.83 |                              |
| sul2         | 31A |       |       |      | LowEfficiency, CtIsSmall, S: |
| sulA/foIP-01 | 31A | 18.96 | 81.3  | 1.98 |                              |
| sulA/foIP-03 | 31A | 19.23 | 83.87 | 1.99 |                              |
| tet(32)      | 31A |       |       |      | CurveFitFailed               |
| tet(34)      | 31A | 29.64 | 75.98 | 1.97 |                              |
| tet(35)      | 31A |       |       |      | NoAmplification              |
| tet(36)-A    | 31A |       |       |      | LowEfficiency, CtIsSmall, C: |
| tet(36)-B    | 31A |       |       |      | LowEfficiency, CtIsSmall, C: |
| tet(37)      | 31A | 22.65 | 76.58 | 1.97 |                              |
| tetA-01      | 31A | 30.28 | 85.16 | 1.91 |                              |
| tetA-02      | 31A | 36.71 | 81.84 | 1.78 |                              |
| tetB-01      | 31A | 23.8  | 85.27 | 1.96 |                              |
| tetB-02      | 31A | 23.44 | 79.86 | 2    |                              |
| tetC-01      | 31A | 24.19 | 75.48 | 2.02 |                              |
| tetC-02      | 31A | 23.46 | 76.24 | 2.05 |                              |
| tetD-01      | 31A |       |       |      | CurveFitFailed               |
| tetD-02      | 31A | 37.08 | 76.45 | 1.88 |                              |
| tetE         | 31A |       |       |      | CurveFitFailed               |
| tetG-01      | 31A | 30.6  | 89.89 | 2.04 |                              |
| tetG-02      | 31A | 31.39 | 89.52 | 1.9  |                              |
| tetH         | 31A |       |       |      | LowEfficiency, CtIsSmall, S: |
| tetJ         | 31A |       |       |      | LowEfficiency, CtIsSmall, S: |
| tetK         | 31A |       |       |      | LowEfficiency, CtIsSmall, S: |
| tetL-01      | 31A | 35.41 | 81.06 | 1.83 |                              |
| tetL-02      | 31A | 34.85 | 85.47 | 1.74 |                              |
| tetM-01      | 31A | 15.67 | 76.41 | 2.05 |                              |
| tetM-02      | 31A | 15.75 | 77.69 | 2.07 |                              |
| tetO-01      | 31A | 18.08 | 77.16 | 2.08 |                              |
| tetPA        | 31A |       |       |      | CurveFitFailed               |
| tetPB-01     | 31A |       |       |      | BadR2, LowEfficiency, CtIsS  |
| tetPB-02     | 31A | 28.5  | 84.93 | 2    |                              |
| tetPB-03     | 31A |       |       |      | LowEfficiency, CtIsSmall, S: |
| tetPB-05     | 31A |       |       |      | LowEfficiency, CtIsSmall, S: |
| tetQ         | 31A |       |       |      | CurveFitFailed               |
| tetR-02      | 31A | 31.37 | 90.9  | 1.91 |                              |
| tetR-03      | 31A | 24.08 | 76.29 | 1.97 |                              |
| tetS         | 31A | 36.03 | 87.74 | 1.87 |                              |

|             |     |       |       |      |                                          |
|-------------|-----|-------|-------|------|------------------------------------------|
| tetT        | 31A |       |       |      | NoAmplification                          |
| tetU-01     | 31A |       |       |      | CurveFitFailed                           |
| tetV        | 31A |       |       |      | CtIsSmall, SaturationBaseli              |
| tetW-01     | 31A |       |       |      | LowEfficiency, CtIsSmall, S <sub>e</sub> |
| tetX        | 31A |       |       |      | CurveFitFailed                           |
| tnpA-01     | 31A |       |       |      | LowEfficiency, CtIsSmall, S <sub>e</sub> |
| tnpA-02     | 31A | 33.4  | 89.56 | 1.85 |                                          |
| tnpA-03     | 31A | 27.98 | 78.08 | 2.1  |                                          |
| tnpA-04     | 31A | 28.69 | 82.44 | 1.94 |                                          |
| tnpA-05     | 31A | 29.41 | 80.86 | 1.9  |                                          |
| tnpA-07     | 31A |       |       |      | LowEfficiency, CtIsSmall, C <sub>i</sub> |
| tolC-01     | 31A |       |       |      | LowEfficiency, CtIsSmall, S <sub>e</sub> |
| tolC-02     | 31A | 30.73 | 85.42 | 1.94 |                                          |
| tolC-03     | 31A | 34.14 | 85.01 | 1.88 |                                          |
| Tp614       | 31A | 34.29 | 73.24 | 1.9  |                                          |
| ttgA        | 31A | 33.52 | 87.54 | 1.89 |                                          |
| ttgB        | 31A |       |       |      | LowEfficiency, CtIsSmall, S <sub>e</sub> |
| vanA        | 31A |       |       |      | NoAmplification                          |
| vanB-01     | 31A | 29.93 | 86.22 | 2.01 |                                          |
| vanC-01     | 31A |       |       |      | LowEfficiency, CtIsSmall, S <sub>e</sub> |
| vanC-02     | 31A |       |       |      | LowEfficiency, CtIsSmall, S <sub>e</sub> |
| vanC-03     | 31A | 27.9  | 86.21 | 1.92 |                                          |
| vanC1       | 31A |       |       |      | CurveFitFailed                           |
| vanC2/vanC3 | 31A | 38    | 84.68 | 1.72 | MultipleMeltPeaks                        |
| vanG        | 31A |       |       |      | LowEfficiency, CtIsSmall, C <sub>i</sub> |
| vanHB       | 31A | 31.04 | 90.25 | 1.85 |                                          |
| vanHD       | 31A | 31.52 | 82.8  | 1.9  |                                          |
| vanRA-01    | 31A |       |       |      | CurveFitFailed                           |
| vanRA-02    | 31A |       |       |      | CurveFitFailed                           |
| vanRB       | 31A | 29.65 | 85.27 | 2.18 |                                          |
| vanRC       | 31A |       |       |      | CurveFitFailed                           |
| vanRC4      | 31A |       |       |      | LowEfficiency, CtIsSmall, S <sub>e</sub> |
| vanRD       | 31A |       |       |      | BadR2, LowEfficiency, CtIsS              |
| vanSA       | 31A |       |       |      | LowEfficiency, CtIsSmall, S <sub>e</sub> |
| vanSB       | 31A | 27.09 | 85.47 | 2.07 |                                          |
| vanSC-01    | 31A | 32.7  | 77.63 | 2.11 | MultipleMeltPeaks                        |
| vanSC-02    | 31A | 33.1  | 76.15 | 1.89 |                                          |
| vanTC-01    | 31A |       |       |      | LowEfficiency, CtIsSmall, S <sub>e</sub> |
| vanTC-02    | 31A | 26.43 | 86.4  | 1.88 |                                          |
| vanTE       | 31A |       |       |      | CurveFitFailed                           |
| vanTG       | 31A |       |       |      | LowEfficiency, CtIsSmall, C <sub>i</sub> |
| vanWB       | 31A |       |       |      | LowEfficiency, CtIsSmall, C <sub>i</sub> |
| vanWG       | 31A |       |       |      | LowEfficiency, CtIsSmall, S <sub>e</sub> |
| vanXA       | 31A |       |       |      | LowEfficiency, CtIsSmall, S <sub>e</sub> |
| vanXB       | 31A |       |       |      | CurveFitFailed                           |
| vanXD       | 31A | 30.86 | 75.42 | 2    |                                          |

|              |     |       |       |      |                              |
|--------------|-----|-------|-------|------|------------------------------|
| vanYB        | 31A |       |       |      | LowEfficiency, CtIsSmall, Ci |
| vanYD-01     | 31A | 29.67 | 89.18 | 1.82 |                              |
| vanYD-02     | 31A |       |       |      | LowEfficiency, CtIsSmall, Ci |
| vatB-01      | 31A | 30.88 | 75.33 | 1.98 |                              |
| vatB-02      | 31A |       |       |      | CurveFitFailed               |
| vatC-01      | 31A | 35.59 | 81.26 | 1.84 | MultipleMeltPeaks            |
| vatC-02      | 31A |       |       |      | LowEfficiency, CtIsSmall, S: |
| vatE-01      | 31A | 30.94 | 76.64 | 2.17 |                              |
| vatE-02      | 31A | 40.41 | 75.03 | 1.85 |                              |
| vgaA-01      | 31A |       |       |      | CurveFitFailed               |
| vgaA-02      | 31A |       |       |      | LowEfficiency, CtIsSmall, S: |
| vgb-01       | 31A | 31.41 | 88.43 | 1.96 |                              |
| vgbB-01      | 31A |       |       |      | LowEfficiency, CtIsSmall, S: |
| vgbB-02      | 31A |       |       |      | LowEfficiency, CtIsSmall, S: |
| yceE/mdtG-0  | 31A | 38.14 | 77.66 | 1.86 |                              |
| yceE/mdtG-0  | 31A |       |       |      | CurveFitFailed               |
| yceL/mdtH-0  | 31A | 30.39 | 84.48 | 1.97 |                              |
| yceL/mdtH-0  | 31A |       |       |      | CurveFitFailed               |
| yceL/mdtH-0  | 31A | 33.49 | 89.25 | 1.89 |                              |
| yidY/mdtL-01 | 31A | 31.91 | 88.45 | 1.91 |                              |
| yidY/mdtL-02 | 31A |       |       |      | LowEfficiency, CtIsSmall, Ci |































| Assay          | Sample | Ct | Tm    | Efficiency | flag                                     |
|----------------|--------|----|-------|------------|------------------------------------------|
| 16S rRNA       | 31B    |    | 13.84 | 82.25      | 2.19                                     |
| aac            | 31B    |    | 28.96 | 82.9       | 2.07 MultipleMeltPeaks                   |
| aac(6')-Ib(akz | 31B    |    |       |            | CurveFitFailed                           |
| aac(6')-Ib(akz | 31B    |    | 28.4  | 86.21      | 1.99                                     |
| aac(6')-Ib(akz | 31B    |    | 32.3  | 78.47      | 1.94 MultipleMeltPeaks                   |
| aac(6')-II     | 31B    |    | 31.24 | 83.19      | 1.81 MultipleMeltPeaks                   |
| aac(6')I1      | 31B    |    | 34.6  | 87.7       | 1.81                                     |
| aacA/aphD      | 31B    |    |       |            | CurveFitFailed                           |
| aacC           | 31B    |    | 28.79 | 89.69      | 1.97 MultipleMeltPeaks                   |
| aacC1          | 31B    |    |       |            | CurveFitFailed                           |
| aacC2          | 31B    |    |       |            | LowEfficiency, CtIsSmall, Ct             |
| aacC4          | 31B    |    | 30.82 | 89.72      | 1.9                                      |
| aadA-01        | 31B    |    | 36.73 | 75.13      | 1.87                                     |
| aadA-02        | 31B    |    | 31.28 | 84.31      | 1.94 MultipleMeltPeaks                   |
| aadA-1-01      | 31B    |    | 32.88 | 76.86      | 2 MultipleMeltPeaks                      |
| aadA-1-02      | 31B    |    |       |            | LowEfficiency, CtIsSmall, S <sub>c</sub> |
| aadA1          | 31B    |    | 30.29 | 84.37      | 2.03                                     |
| aadA2-01       | 31B    |    |       |            | LowEfficiency, CtIsSmall, S <sub>c</sub> |
| aadA2-02       | 31B    |    | 30.25 | 75.49      | 2.11                                     |
| aadA2-03       | 31B    |    | 37.36 | 83.03      | 1.79 MultipleMeltPeaks                   |
| aadA5-01       | 31B    |    | 35.78 | 77.21      | 1.86 MultipleMeltPeaks                   |
| aadA5-02       | 31B    |    | 32.36 | 92.48      | 2.01                                     |
| aadA9-01       | 31B    |    |       |            | CurveFitFailed                           |
| aadA9-02       | 31B    |    | 38.14 | 73.68      | 1.87                                     |
| aadD           | 31B    |    |       |            | LowEfficiency, CtIsSmall, S <sub>c</sub> |
| aadE           | 31B    |    |       |            | LowEfficiency, CtIsSmall, S <sub>c</sub> |
| acrA-01        | 31B    |    | 31.16 | 88.77      | 1.92                                     |
| acrA-02        | 31B    |    | 33.37 | 81.32      | 1.9 MultipleMeltPeaks                    |
| acrA-03        | 31B    |    | 36.45 | 89.99      | 1.67 MultipleMeltPeaks                   |
| acrA-04        | 31B    |    | 28.29 | 86.49      | 1.98                                     |
| acrA-05        | 31B    |    | 30.38 | 88.46      | 1.98                                     |
| acrB-01        | 31B    |    | 30.27 | 81.43      | 1.94                                     |
| acrF           | 31B    |    | 25.96 | 82.94      | 1.85                                     |
| acrR-01        | 31B    |    | 32.6  | 79.57      | 1.96 MultipleMeltPeaks                   |
| acrR-02        | 31B    |    | 34.99 | 86.4       | 1.83 MultipleMeltPeaks                   |
| Actin          | 31B    |    | 21.38 | 87.06      | 1.97                                     |
| adeA           | 31B    |    | 33.35 | 88.63      | 1.87                                     |
| ampC-01        | 31B    |    | 30.41 | 87.13      | 2.01 MultipleMeltPeaks                   |
| ampC-02        | 31B    |    | 36.9  | 78.79      | 1.9                                      |
| ampC-04        | 31B    |    | 29.51 | 80.46      | 1.82 MultipleMeltPeaks                   |
| ampC-05        | 31B    |    |       |            | CurveFitFailed                           |
| ampC-06        | 31B    |    |       |            | CurveFitFailed                           |
| ampC-07        | 31B    |    | 34.1  | 88.28      | 1.86                                     |
| ampC-09        | 31B    |    | 34.57 | 86.7       | 1.81                                     |
| ampC/blaDH     | 31B    |    | 28.83 | 85.27      | 1.99                                     |

|                            |     |       |       |      |                                          |
|----------------------------|-----|-------|-------|------|------------------------------------------|
| aph                        | 31B |       |       |      | CurveFitFailed                           |
| aph(2')-Id-01              | 31B |       |       |      | CurveFitFailed                           |
| aph(2')-Id-02              | 31B |       |       |      | LowEfficiency, CtIsSmall, S <sub>e</sub> |
| aph6ia                     | 31B | 31.49 | 78.18 | 1.93 |                                          |
| aphA1(aka k <sub>a</sub> ) | 31B |       |       |      | CurveFitFailed                           |
| bacA-01                    | 31B | 36.34 | 81.17 | 1.86 | MultipleMeltPeaks                        |
| bacA-02                    | 31B | 33.84 | 88.2  | 1.81 |                                          |
| BETA-globin                | 31B | 22.95 | 83.89 | 2    | MultipleMeltPeaks                        |
| bla-ACC-1                  | 31B | 35.91 | 81.3  | 1.78 | MultipleMeltPeaks                        |
| bla-L1                     | 31B | 28.67 | 85.63 | 2    |                                          |
| bla1                       | 31B |       |       |      | LowEfficiency, CtIsSmall, S <sub>e</sub> |
| blaCMY                     | 31B | 33.02 | 80.53 | 1.91 |                                          |
| blaCMY2-01                 | 31B | 32.55 | 74.89 | 2.12 | MultipleMeltPeaks                        |
| blaCMY2-02                 | 31B | 27.6  | 85.03 | 2.01 | MultipleMeltPeaks                        |
| blaCTX-M-01                | 31B | 38.52 | 80.78 | 1.79 |                                          |
| blaCTX-M-02                | 31B | 29.64 | 85.8  | 1.93 |                                          |
| blaCTX-M-03                | 31B | 36.89 | 84.52 | 1.83 |                                          |
| blaCTX-M-04                | 31B | 29.82 | 88.64 | 2.03 | MultipleMeltPeaks                        |
| blaCTX-M-05                | 31B | 33.43 | 75.91 | 1.72 | MultipleMeltPeaks                        |
| blaCTX-M-06                | 31B | 36.68 | 77.43 | 1.92 | MultipleMeltPeaks                        |
| blaGES                     | 31B |       |       |      | CurveFitFailed                           |
| blaIMP-01                  | 31B |       |       |      | LowEfficiency, CtIsSmall, S <sub>e</sub> |
| blaIMP-02                  | 31B |       |       |      | LowEfficiency, CtIsSmall, S <sub>e</sub> |
| blaMOX/blaC                | 31B | 34.57 | 80.86 | 1.89 | MultipleMeltPeaks                        |
| blaOCH                     | 31B |       |       |      | NoAmplification                          |
| blaOKP                     | 31B |       |       |      | NoAmplification                          |
| blaOXA1/blaC               | 31B |       |       |      | LowEfficiency, CtIsSmall, S <sub>e</sub> |
| blaOXA10-01                | 31B |       |       |      | LowEfficiency, CtIsSmall, S <sub>e</sub> |
| blaOXA10-02                | 31B |       |       |      | LowEfficiency, CtIsSmall, S <sub>e</sub> |
| blaOXY                     | 31B | 27.97 | 90.25 | 1.89 |                                          |
| blaPAO                     | 31B |       |       |      | CurveFitFailed                           |
| blaPER                     | 31B | 35.32 | 70.08 | 1.73 | MultipleMeltPeaks                        |
| blaPSE                     | 31B |       |       |      | CurveFitFailed                           |
| blaROB                     | 31B |       |       |      | CurveFitFailed                           |
| blaSFO                     | 31B | 29.15 | 89.37 | 1.94 | MultipleMeltPeaks                        |
| blaSHV-01                  | 31B | 32.02 | 86.6  | 1.76 |                                          |
| blaSHV-02                  | 31B |       |       |      | CurveFitFailed                           |
| blaTEM                     | 31B |       |       |      | NoAmplification                          |
| blaTLA                     | 31B |       |       |      | LowEfficiency, CtIsSmall, S <sub>e</sub> |
| blaVEB                     | 31B |       |       |      | LowEfficiency, CtIsSmall, S <sub>e</sub> |
| blaVIM                     | 31B | 37.18 | 89.48 | 1.83 |                                          |
| blaZ                       | 31B |       |       |      | LowEfficiency, CtIsSmall, S <sub>e</sub> |
| carB                       | 31B | 32.57 | 87.2  | 1.92 |                                          |
| catA1                      | 31B |       |       |      | NoAmplification                          |
| catB3                      | 31B |       |       |      | CurveFitFailed                           |
| catB8                      | 31B | 27.44 | 82.39 | 1.95 |                                          |

|            |     |       |       |      |                              |
|------------|-----|-------|-------|------|------------------------------|
| ceoA       | 31B | 29.24 | 82.06 | 1.94 | MultipleMeltPeaks            |
| cepA       | 31B |       |       |      | LowEfficiency, CtIsSmall, Ci |
| cfiA       | 31B | 30.61 | 87.38 | 1.94 | MultipleMeltPeaks            |
| cfr        | 31B |       |       |      | LowEfficiency, CtIsSmall, S: |
| cfxA       | 31B | 29.18 | 77.35 | 2.09 |                              |
| cmeA       | 31B | 36.75 | 85.02 | 1.86 | MultipleMeltPeaks            |
| cmlA1-01   | 31B |       |       |      | CurveFitFailed               |
| cmlA1-02   | 31B |       |       |      | LowEfficiency, CtIsSmall, Ci |
| cmr        | 31B | 32.66 | 78.63 | 1.91 |                              |
| cmx(A)     | 31B | 27.68 | 84.51 | 2.01 | MultipleMeltPeaks            |
| cphA-01    | 31B | 29.41 | 89.98 | 2    |                              |
| cphA-02    | 31B | 29.44 | 82.23 | 2    |                              |
| dfrA1      | 31B | 34.64 | 80.26 | 1.94 |                              |
| dfrA12     | 31B | 30.8  | 85.75 | 1.76 |                              |
| emrD       | 31B | 25.7  | 89.04 | 1.9  |                              |
| ereA       | 31B | 33.01 | 82.38 | 1.94 |                              |
| ereB       | 31B | 34.9  | 87.68 | 1.83 | MultipleMeltPeaks            |
| erm(34)    | 31B | 35.38 | 84.09 | 1.77 |                              |
| erm(35)    | 31B | 37.65 | 81.64 | 1.88 |                              |
| erm(36)    | 31B | 32.34 | 81.8  | 2.11 |                              |
| ermA       | 31B |       |       |      | LowEfficiency, CtIsSmall, S: |
| ermA/ermTR | 31B |       |       |      | NoAmplification              |
| ermB       | 31B |       |       |      | LowEfficiency, CtIsSmall, S: |
| ermC       | 31B |       |       |      | CurveFitFailed               |
| ermF       | 31B |       |       |      | LowEfficiency, CtIsSmall, S: |
| ermJ/ermD  | 31B |       |       |      | CurveFitFailed               |
| ermK-01    | 31B |       |       |      | CurveFitFailed               |
| ermK-02    | 31B | 33.76 | 85.27 | 1.9  |                              |
| ermT-01    | 31B |       |       |      | CurveFitFailed               |
| ermT-02    | 31B |       |       |      | LowEfficiency, CtIsSmall, Ci |
| ermX       | 31B | 29.82 | 83.26 | 1.89 | MultipleMeltPeaks            |
| ermY       | 31B |       |       |      | LowEfficiency, CtIsSmall, S: |
| fabK       | 31B | 24.87 | 79.03 | 2.15 |                              |
| floR       | 31B | 37.91 | 66.53 | 1.82 | MultipleMeltPeaks            |
| folA       | 31B |       |       |      | NoAmplification              |
| fosB       | 31B |       |       |      | LowEfficiency, CtIsSmall, S: |
| fosX       | 31B |       |       |      | LowEfficiency, CtIsSmall, S: |
| fox5       | 31B | 25.1  | 86.89 | 1.96 | MultipleMeltPeaks            |
| imiR       | 31B |       |       |      | CurveFitFailed               |
| lmrA-01    | 31B | 34.05 | 79.21 | 1.94 |                              |
| intl       | 31B | 29.85 | 84.64 | 2    |                              |
| intl1      | 31B | 19.7  | 87.13 | 2.05 |                              |
| IS613      | 31B | 24.03 | 79.64 | 2.08 |                              |
| lnuA-01    | 31B |       |       |      | LowEfficiency, CtIsSmall, S: |
| lnuB-01    | 31B |       |       |      | LowEfficiency, CtIsSmall, S: |
| lnuB-02    | 31B |       |       |      | LowEfficiency, CtIsSmall, Ci |

|                |     |       |       |      |                              |
|----------------|-----|-------|-------|------|------------------------------|
| lnuC           | 31B | 37.89 | 85.13 | 1.7  | MultipleMeltPeaks            |
| marR-01        | 31B | 35.16 | 81.19 | 1.78 |                              |
| matA/mel       | 31B | 15.95 | 77.7  | 2.11 |                              |
| mdet1          | 31B |       |       |      | LowEfficiency, CtIsSmall, S: |
| mdtA           | 31B |       |       |      | CurveFitFailed               |
| mdtE/yhiU      | 31B | 32.25 | 89.29 | 1.85 |                              |
| mecA           | 31B |       |       |      | LowEfficiency, CtIsSmall, Ci |
| mefA           | 31B | 15.12 | 80.54 | 2.06 |                              |
| mepA           | 31B | 29.26 | 89.13 | 2.04 |                              |
| mexA           | 31B | 35.64 | 89.49 | 1.81 |                              |
| mexD           | 31B | 33.09 | 80.02 | 1.98 |                              |
| mexE           | 31B | 31.42 | 89.82 | 1.85 |                              |
| mexF           | 31B | 26.19 | 87.52 | 2.02 |                              |
| mphA-01        | 31B | 28.38 | 86.7  | 1.99 |                              |
| mphA-02        | 31B | 27.9  | 87.25 | 2.14 |                              |
| mphB           | 31B |       |       |      | CurveFitFailed               |
| mphC           | 31B |       |       |      | CurveFitFailed               |
| msrA-01        | 31B |       |       |      | CurveFitFailed               |
| msrC-01        | 31B |       |       |      | NoAmplification              |
| mtrC-01        | 31B | 30.5  | 83.19 | 1.91 |                              |
| mtrC-02        | 31B | 30.88 | 84.35 | 1.96 |                              |
| mtrD-02        | 31B | 25.97 | 82.57 | 2.05 |                              |
| mtrD-03        | 31B | 32.12 | 85.05 | 1.9  |                              |
| NDM1           | 31B |       |       |      | LowEfficiency, CtIsSmall, S: |
| nimE           | 31B |       |       |      | LowEfficiency, CtIsSmall, S: |
| nisB           | 31B | 37.45 | 74.48 | 1.99 |                              |
| oleC           | 31B | 35.63 | 84.23 | 1.83 |                              |
| oprD           | 31B | 27.61 | 87.31 | 2    |                              |
| oprJ           | 31B | 30.77 | 86.07 | 1.91 | MultipleMeltPeaks            |
| pbp            | 31B |       |       |      | CurveFitFailed               |
| pbp2x          | 31B |       |       |      | LowEfficiency, CtIsSmall, Ci |
| Pbp5           | 31B |       |       |      | LowEfficiency, CtIsSmall, S: |
| penA           | 31B | 32.4  | 86    | 1.87 |                              |
| pikR1          | 31B | 37.56 | 88.19 | 1.76 | MultipleMeltPeaks            |
| pikR2          | 31B | 29.61 | 86.23 | 2.09 | MultipleMeltPeaks            |
| pmrA           | 31B | 19.11 | 79.82 | 2.13 |                              |
| pncA           | 31B | 29.4  | 90.22 | 2.04 |                              |
| putative multi | 31B | 34.24 | 84.03 | 1.93 | MultipleMeltPeaks            |
| qac            | 31B | 34.23 | 88.57 | 1.9  | MultipleMeltPeaks            |
| qacA           | 31B |       |       |      | LowEfficiency, CtIsSmall, S: |
| qacA/qacB      | 31B | 37.27 | 84.72 | 1.5  | MultipleMeltPeaks            |
| qacEdelta1-0   | 31B |       |       |      | LowEfficiency, CtIsSmall, S: |
| qacEdelta1-0   | 31B | 30.87 | 87.44 | 1.98 | MultipleMeltPeaks            |
| qacH-01        | 31B | 30.95 | 88.38 | 1.91 |                              |
| qacH-02        | 31B | 33.85 | 83.92 | 1.7  |                              |
| qnrA           | 31B | 36.25 | 79.74 | 1.88 |                              |



|              |     |       |       |      |                              |
|--------------|-----|-------|-------|------|------------------------------|
| rarD-02      | 31B | 34.16 | 85.83 | 1.91 |                              |
| sat4         | 31B |       |       |      | LowEfficiency, CtIsSmall, S: |
| sdeB         | 31B |       |       |      | LowEfficiency, CtIsSmall, S: |
| spcN-01      | 31B |       |       |      | CurveFitFailed               |
| speA         | 31B |       |       |      | LowEfficiency, CtIsSmall, S: |
| str          | 31B |       |       |      | LowEfficiency, CtIsSmall, S: |
| strA         | 31B |       |       |      | LowEfficiency, CtIsSmall, S: |
| strB         | 31B | 35.56 | 78.91 | 1.9  |                              |
| sul1         | 31B | 34.01 | 89.18 | 1.8  |                              |
| sul2         | 31B |       |       |      | CurveFitFailed               |
| sulA/foIP-01 | 31B | 16.64 | 81.14 | 2.02 |                              |
| sulA/foIP-03 | 31B | 17.39 | 81.85 | 2.03 |                              |
| tet(32)      | 31B |       |       |      | LowEfficiency, CtIsSmall, S: |
| tet(34)      | 31B | 31.83 | 75.64 | 2.01 |                              |
| tet(35)      | 31B |       |       |      | NoAmplification              |
| tet(36)-A    | 31B |       |       |      | LowEfficiency, CtIsSmall, S: |
| tet(36)-B    | 31B |       |       |      | LowEfficiency, CtIsSmall, S: |
| tet(37)      | 31B | 26.73 | 76.45 | 1.98 |                              |
| tetA-01      | 31B | 29.7  | 85.11 | 1.89 |                              |
| tetA-02      | 31B | 31.22 | 87.3  | 1.97 | MultipleMeltPeaks            |
| tetB-01      | 31B | 30.92 | 86    | 1.93 |                              |
| tetB-02      | 31B | 34.98 | 75.07 | 2.01 |                              |
| tetC-01      | 31B |       |       |      | NoAmplification              |
| tetC-02      | 31B | 37.63 | 75.93 | 1.93 |                              |
| tetD-01      | 31B |       |       |      | CurveFitFailed               |
| tetD-02      | 31B | 34.46 | 85.45 | 1.9  |                              |
| tetE         | 31B |       |       |      | BadR2, LowEfficiency, CtIsS  |
| tetG-01      | 31B | 35.04 | 85.38 | 1.86 |                              |
| tetG-02      | 31B | 31.86 | 85.47 | 1.92 | MultipleMeltPeaks            |
| tetH         | 31B | 31.48 | 77.94 | 2.05 |                              |
| tetJ         | 31B |       |       |      | LowEfficiency, CtIsSmall, S: |
| tetK         | 31B |       |       |      | LowEfficiency, CtIsSmall, S: |
| tetL-01      | 31B |       |       |      | CurveFitFailed               |
| tetL-02      | 31B | 31.81 | 85.22 | 1.82 |                              |
| tetM-01      | 31B | 17.6  | 76.33 | 2.04 |                              |
| tetM-02      | 31B | 17.69 | 77.7  | 2.05 |                              |
| tetO-01      | 31B |       |       |      | LowEfficiency, CtIsSmall, S: |
| tetPA        | 31B |       |       |      | CurveFitFailed               |
| tetPB-01     | 31B | 33.3  | 80.84 | 1.97 |                              |
| tetPB-02     | 31B | 27.41 | 84.76 | 2    |                              |
| tetPB-03     | 31B |       |       |      | CurveFitFailed               |
| tetPB-05     | 31B |       |       |      | LowEfficiency, CtIsSmall, S: |
| tetQ         | 31B |       |       |      | CurveFitFailed               |
| tetR-02      | 31B | 28.66 | 89.54 | 1.92 |                              |
| tetR-03      | 31B |       |       |      | CurveFitFailed               |
| tetS         | 31B |       |       |      | CurveFitFailed               |

|             |     |       |       |      |                                          |
|-------------|-----|-------|-------|------|------------------------------------------|
| tetT        | 31B |       |       |      | LowEfficiency, CtIsSmall, S <sub>e</sub> |
| tetU-01     | 31B |       |       |      | LowEfficiency, CtIsSmall, S <sub>e</sub> |
| tetV        | 31B | 33.66 | 79.21 | 1.9  |                                          |
| tetW-01     | 31B | 27.12 | 81.74 | 1.99 |                                          |
| tetX        | 31B |       |       |      | LowEfficiency, CtIsSmall, C <sub>i</sub> |
| tnpA-01     | 31B | 36.38 | 79.52 | 1.96 |                                          |
| tnpA-02     | 31B | 30.75 | 87.68 | 1.83 |                                          |
| tnpA-03     | 31B | 34.53 | 86.3  | 1.83 |                                          |
| tnpA-04     | 31B |       |       |      | BadR2, LowEfficiency, CtIsS              |
| tnpA-05     | 31B | 35.44 | 82.77 | 1.83 |                                          |
| tnpA-07     | 31B |       |       |      | LowEfficiency, CtIsSmall, S <sub>e</sub> |
| tolC-01     | 31B | 37.64 | 79.26 | 1.81 |                                          |
| tolC-02     | 31B | 30.98 | 83.52 | 1.95 | MultipleMeltPeaks                        |
| tolC-03     | 31B | 29.66 | 85.8  | 1.95 |                                          |
| Tp614       | 31B | 32.11 | 83.34 | 1.91 |                                          |
| ttgA        | 31B |       |       |      | CurveFitFailed                           |
| ttgB        | 31B |       |       |      | CurveFitFailed                           |
| vanA        | 31B |       |       |      | LowEfficiency, CtIsSmall, S <sub>e</sub> |
| vanB-01     | 31B | 31.72 | 83.81 | 2.05 |                                          |
| vanC-01     | 31B |       |       |      | LowEfficiency, CtIsSmall, S <sub>e</sub> |
| vanC-02     | 31B |       |       |      | LowEfficiency, CtIsSmall, S <sub>e</sub> |
| vanC-03     | 31B | 26.33 | 85.56 | 1.96 | MultipleMeltPeaks                        |
| vanC1       | 31B |       |       |      | LowEfficiency, CtIsSmall, C <sub>i</sub> |
| vanC2/vanC3 | 31B | 32.79 | 79.26 | 2.07 | MultipleMeltPeaks                        |
| vanG        | 31B |       |       |      | CurveFitFailed                           |
| vanHB       | 31B | 35.04 | 76.77 | 1.86 | MultipleMeltPeaks                        |
| vanHD       | 31B | 35.45 | 77.5  | 1.84 | MultipleMeltPeaks                        |
| vanRA-01    | 31B |       |       |      | LowEfficiency, CtIsSmall, S <sub>e</sub> |
| vanRA-02    | 31B |       |       |      | CurveFitFailed                           |
| vanRB       | 31B | 32.97 | 87.48 | 1.92 |                                          |
| vanRC       | 31B |       |       |      | CurveFitFailed                           |
| vanRC4      | 31B |       |       |      | CurveFitFailed                           |
| vanRD       | 31B |       |       |      | CurveFitFailed                           |
| vanSA       | 31B |       |       |      | CurveFitFailed                           |
| vanSB       | 31B | 32.54 | 74.25 | 1.94 |                                          |
| vanSC-01    | 31B | 31.31 | 77.3  | 2.1  |                                          |
| vanSC-02    | 31B |       |       |      | NoAmplification                          |
| vanTC-01    | 31B |       |       |      | LowEfficiency, CtIsSmall, S <sub>e</sub> |
| vanTC-02    | 31B | 27.72 | 87.16 | 1.84 |                                          |
| vanTE       | 31B | 35.86 | 77.63 | 1.78 | MultipleMeltPeaks                        |
| vanTG       | 31B |       |       |      | LowEfficiency, CtIsSmall, C <sub>i</sub> |
| vanWB       | 31B |       |       |      | LowEfficiency, CtIsSmall, S <sub>e</sub> |
| vanWG       | 31B | 37.26 | 74.03 | 2    |                                          |
| vanXA       | 31B |       |       |      | CurveFitFailed                           |
| vanXB       | 31B |       |       |      | LowEfficiency, CtIsSmall, C <sub>i</sub> |
| vanXD       | 31B | 30.18 | 75.95 | 2.01 |                                          |

|              |     |       |       |                              |
|--------------|-----|-------|-------|------------------------------|
| vanYB        | 31B |       |       | CurveFitFailed               |
| vanYD-01     | 31B | 28.28 | 88.74 | 1.91                         |
| vanYD-02     | 31B | 37.64 | 85.63 | 1.88 MultipleMeltPeaks       |
| vatB-01      | 31B | 35.79 | 74.95 | 1.9                          |
| vatB-02      | 31B |       |       | CurveFitFailed               |
| vatC-01      | 31B | 31.67 | 83.96 | 1.95 MultipleMeltPeaks       |
| vatC-02      | 31B | 36.72 | 83.18 | 1.91                         |
| vatE-01      | 31B | 29.98 | 78.08 | 1.95                         |
| vatE-02      | 31B |       |       | NoAmplification              |
| vgaA-01      | 31B | 32.42 | 88.68 | 1.93                         |
| vgaA-02      | 31B |       |       | CurveFitFailed               |
| vgb-01       | 31B | 35.05 | 88.46 | 1.88                         |
| vgbB-01      | 31B | 37.23 | 88.84 | 1.81 MultipleMeltPeaks       |
| vgbB-02      | 31B |       |       | CurveFitFailed               |
| yceE/mdtG-0  | 31B |       |       | CurveFitFailed               |
| yceE/mdtG-0  | 31B | 37    | 81.52 | 1.89 MultipleMeltPeaks       |
| yceL/mdtH-0  | 31B | 30.11 | 85.57 | 1.96                         |
| yceL/mdtH-0  | 31B |       |       | LowEfficiency, CtIsSmall, S: |
| yceL/mdtH-0  | 31B | 33.32 | 87.51 | 1.88 MultipleMeltPeaks       |
| yidY/mdtL-01 | 31B | 31.03 | 82.43 | 1.97 MultipleMeltPeaks       |
| yidY/mdtL-02 | 31B | 34.27 | 77.24 | 2.02                         |































| Assay           | Sample | Ct | Tm    | Efficiency | flag                         |
|-----------------|--------|----|-------|------------|------------------------------|
| 16S rRNA        | 31C    |    | 13.45 | 82.33      | 2.08                         |
| aac             | 31C    |    | 32.55 | 83.01      | 1.88 MultipleMeltPeaks       |
| aac(6')-Ib(akz) | 31C    |    |       |            | NoAmplification              |
| aac(6')-Ib(akz) | 31C    |    | 32.29 | 77.36      | 1.96 MultipleMeltPeaks       |
| aac(6')-Ib(akz) | 31C    |    | 30.19 | 83.6       | 1.98                         |
| aac(6')-II      | 31C    |    | 35.71 | 87.52      | 1.67                         |
| aac(6')I1       | 31C    |    | 34.31 | 90.34      | 1.86                         |
| aacA/aphD       | 31C    |    |       |            | LowEfficiency, CtIsSmall, S: |
| aacC            | 31C    |    | 28.25 | 88.49      | 1.9                          |
| aacC1           | 31C    |    |       |            | LowEfficiency, CtIsSmall, S: |
| aacC2           | 31C    |    |       |            | LowEfficiency, CtIsSmall, S: |
| aacC4           | 31C    |    | 28.76 | 91.41      | 1.78                         |
| aadA-01         | 31C    |    | 29.87 | 81.43      | 1.95                         |
| aadA-02         | 31C    |    |       |            | CurveFitFailed               |
| aadA-1-01       | 31C    |    | 36.1  | 79.13      | 1.89                         |
| aadA-1-02       | 31C    |    |       |            | LowEfficiency, CtIsSmall, S: |
| aadA1           | 31C    |    | 30.82 | 83.45      | 2.01                         |
| aadA2-01        | 31C    |    |       |            | CurveFitFailed               |
| aadA2-02        | 31C    |    | 30.65 | 75.51      | 2.03                         |
| aadA2-03        | 31C    |    |       |            | CurveFitFailed               |
| aadA5-01        | 31C    |    | 36.31 | 78.12      | 1.85 MultipleMeltPeaks       |
| aadA5-02        | 31C    |    | 35.56 | 83.53      | 1.94 MultipleMeltPeaks       |
| aadA9-01        | 31C    |    |       |            | LowEfficiency, CtIsSmall, S: |
| aadA9-02        | 31C    |    |       |            | BadR2, LowEfficiency, CtIsS  |
| aadD            | 31C    |    |       |            | LowEfficiency, CtIsSmall, S: |
| aadE            | 31C    |    |       |            | LowEfficiency, CtIsSmall, S: |
| acrA-01         | 31C    |    | 23.3  | 83.08      | 1.93                         |
| acrA-02         | 31C    |    | 31.81 | 82.64      | 1.85 MultipleMeltPeaks       |
| acrA-03         | 31C    |    | 33.86 | 78.62      | 1.9 MultipleMeltPeaks        |
| acrA-04         | 31C    |    | 30.66 | 80.29      | 1.95 MultipleMeltPeaks       |
| acrA-05         | 31C    |    | 30.31 | 87.91      | 1.99 MultipleMeltPeaks       |
| acrB-01         | 31C    |    |       |            | CurveFitFailed               |
| acrF            | 31C    |    | 29.16 | 81.99      | 1.83                         |
| acrR-01         | 31C    |    | 33.14 | 81.11      | 1.77                         |
| acrR-02         | 31C    |    | 28.3  | 80.71      | 1.93                         |
| Actin           | 31C    |    | 21.88 | 87.1       | 1.93                         |
| adeA            | 31C    |    | 34.66 | 83.68      | 1.87                         |
| ampC-01         | 31C    |    | 31.35 | 80.32      | 1.84 MultipleMeltPeaks       |
| ampC-02         | 31C    |    |       |            | CurveFitFailed               |
| ampC-04         | 31C    |    | 33.3  | 90.64      | 1.79 MultipleMeltPeaks       |
| ampC-05         | 31C    |    |       |            | LowEfficiency, CtIsSmall, S: |
| ampC-06         | 31C    |    |       |            | LowEfficiency, CtIsSmall, S: |
| ampC-07         | 31C    |    |       |            | CurveFitFailed               |
| ampC-09         | 31C    |    | 36.43 | 91         | 1.64                         |
| ampC/blaDH      | 31C    |    | 30.53 | 87.59      | 1.99                         |

|                          |     |       |       |      |                              |
|--------------------------|-----|-------|-------|------|------------------------------|
| aph                      | 31C |       |       |      | LowEfficiency, CtIsSmall, S: |
| aph(2')-Id-01            | 31C |       |       |      | LowEfficiency, CtIsSmall, S: |
| aph(2')-Id-02            | 31C |       |       |      | LowEfficiency, CtIsSmall, S: |
| aph6ia                   | 31C | 27.47 | 78.42 | 1.95 |                              |
| aphA1(aka k <sub>a</sub> | 31C |       |       |      | LowEfficiency, CtIsSmall, S: |
| bacA-01                  | 31C |       |       |      | CurveFitFailed               |
| bacA-02                  | 31C |       |       |      | CurveFitFailed               |
| BETA-globin              | 31C | 22.39 | 84    | 1.95 | MultipleMeltPeaks            |
| bla-ACC-1                | 31C | 34.69 | 89.09 | 1.85 |                              |
| bla-L1                   | 31C | 29.98 | 84.91 | 2    |                              |
| bla1                     | 31C |       |       |      | LowEfficiency, CtIsSmall, S: |
| blaCMY                   | 31C | 29.78 | 80.72 | 1.92 |                              |
| blaCMY2-01               | 31C |       |       |      | CurveFitFailed               |
| blaCMY2-02               | 31C | 28.44 | 86.79 | 2.02 |                              |
| blaCTX-M-01              | 31C |       |       |      | CurveFitFailed               |
| blaCTX-M-02              | 31C | 32.99 | 74.93 | 1.78 |                              |
| blaCTX-M-03              | 31C |       |       |      | CurveFitFailed               |
| blaCTX-M-04              | 31C | 30.32 | 88.03 | 1.94 |                              |
| blaCTX-M-05              | 31C | 32.32 | 77.71 | 1.83 |                              |
| blaCTX-M-06              | 31C |       |       |      | LowEfficiency, CtIsSmall, S: |
| blaGES                   | 31C |       |       |      | LowEfficiency, CtIsSmall, S: |
| blaIMP-01                | 31C |       |       |      | CurveFitFailed               |
| blaIMP-02                | 31C |       |       |      | CurveFitFailed               |
| blaMOX/blaC              | 31C |       |       |      | CurveFitFailed               |
| blaOCH                   | 31C |       |       |      | NoAmplification              |
| blaOKP                   | 31C |       |       |      | NoAmplification              |
| blaOXA1/blaC             | 31C |       |       |      | LowEfficiency, CtIsSmall, S: |
| blaOXA10-01              | 31C |       |       |      | NoAmplification              |
| blaOXA10-02              | 31C |       |       |      | CurveFitFailed               |
| blaOXY                   | 31C | 30.46 | 89.81 | 1.33 |                              |
| blaPAO                   | 31C |       |       |      | LowEfficiency, CtIsSmall, S: |
| blaPER                   | 31C |       |       |      | NoAmplification              |
| blaPSE                   | 31C |       |       |      | CurveFitFailed               |
| blaROB                   | 31C | 30.4  | 87.47 | 1.95 |                              |
| blaSFO                   | 31C | 29.91 | 90.16 | 1.92 |                              |
| blaSHV-01                | 31C |       |       |      | CurveFitFailed               |
| blaSHV-02                | 31C | 28.72 | 85.98 | 1.97 |                              |
| blaTEM                   | 31C | 28.44 | 79.64 | 2.03 |                              |
| blaTLA                   | 31C |       |       |      | LowEfficiency, CtIsSmall, S: |
| blaVEB                   | 31C |       |       |      | LowEfficiency, CtIsSmall, S: |
| blaVIM                   | 31C |       |       |      | CurveFitFailed               |
| blaZ                     | 31C | 26.88 | 73.94 | 2.05 |                              |
| carB                     | 31C | 32.01 | 80.33 | 1.95 |                              |
| catA1                    | 31C |       |       |      | NoAmplification              |
| catB3                    | 31C |       |       |      | LowEfficiency, CtIsSmall, S: |
| catB8                    | 31C | 31.38 | 81.98 | 1.98 |                              |

|            |     |       |       |      |                              |
|------------|-----|-------|-------|------|------------------------------|
| ceoA       | 31C | 29.14 | 85.14 | 1.94 |                              |
| cepA       | 31C |       |       |      | LowEfficiency, CtIsSmall, S: |
| cfiA       | 31C | 34.28 | 84.45 | 1.94 |                              |
| cfr        | 31C |       |       |      | LowEfficiency, CtIsSmall, S: |
| cfxA       | 31C | 23.28 | 77.61 | 2.12 |                              |
| cmeA       | 31C |       |       |      | CurveFitFailed               |
| cmlA1-01   | 31C | 33.39 | 89.66 | 1.92 | MultipleMeltPeaks            |
| cmlA1-02   | 31C | 36.7  | 87.85 | 1.9  |                              |
| cmr        | 31C |       |       |      | CurveFitFailed               |
| cmx(A)     | 31C | 30.43 | 84.74 | 1.93 |                              |
| cphA-01    | 31C | 33.01 | 89.59 | 1.94 |                              |
| cphA-02    | 31C | 31.59 | 81.97 | 1.93 |                              |
| dfrA1      | 31C |       |       |      | CurveFitFailed               |
| dfrA12     | 31C |       |       |      | CurveFitFailed               |
| emrD       | 31C | 35.56 | 87.95 | 1.65 |                              |
| ereA       | 31C |       |       |      | NoAmplification              |
| ereB       | 31C |       |       |      | CurveFitFailed               |
| erm(34)    | 31C |       |       |      | NoAmplification              |
| erm(35)    | 31C |       |       |      | LowEfficiency, CtIsSmall, S: |
| erm(36)    | 31C | 32.22 | 86.24 | 2.08 | MultipleMeltPeaks            |
| ermA       | 31C |       |       |      | LowEfficiency, CtIsSmall, S: |
| ermA/ermTR | 31C |       |       |      | NoAmplification              |
| ermB       | 31C | 17.77 | 75.04 | 2.19 |                              |
| ermC       | 31C | 27.37 | 75.58 | 2.01 |                              |
| ermF       | 31C |       |       |      | CurveFitFailed               |
| ermJ/ermD  | 31C |       |       |      | LowEfficiency, CtIsSmall, S: |
| ermK-01    | 31C |       |       |      | LowEfficiency, CtIsSmall, S: |
| ermK-02    | 31C |       |       |      | CurveFitFailed               |
| ermT-01    | 31C |       |       |      | LowEfficiency, CtIsSmall, S: |
| ermT-02    | 31C |       |       |      | CurveFitFailed               |
| ermX       | 31C |       |       |      | CurveFitFailed               |
| ermY       | 31C |       |       |      | LowEfficiency, CtIsSmall, S: |
| fabK       | 31C | 23.64 | 78.36 | 2.09 |                              |
| floR       | 31C | 37.51 | 88.94 | 1.78 | MultipleMeltPeaks            |
| folA       | 31C |       |       |      | NoAmplification              |
| fosB       | 31C |       |       |      | LowEfficiency, CtIsSmall, S: |
| fosX       | 31C |       |       |      | CurveFitFailed               |
| fox5       | 31C | 25.46 | 86    | 1.94 |                              |
| imiR       | 31C |       |       |      | CurveFitFailed               |
| ImrA-01    | 31C | 36.54 | 82.69 | 1.94 |                              |
| intl       | 31C | 31.85 | 84.83 | 1.92 | MultipleMeltPeaks            |
| intl1      | 31C | 20.36 | 86.61 | 2.04 |                              |
| IS613      | 31C | 24.44 | 80.05 | 2.06 |                              |
| lnuA-01    | 31C |       |       |      | CurveFitFailed               |
| lnuB-01    | 31C |       |       |      | LowEfficiency, CtIsSmall, S: |
| lnuB-02    | 31C |       |       |      | LowEfficiency, CtIsSmall, S: |

|               |     |       |       |      |                              |
|---------------|-----|-------|-------|------|------------------------------|
| lnuC          | 31C | 36.4  | 81.18 | 1.81 |                              |
| marR-01       | 31C | 34.46 | 89.93 | 1.88 |                              |
| matA/mel      | 31C | 15.64 | 77.76 | 2.11 |                              |
| mdet1         | 31C |       |       |      | LowEfficiency, CtIsSmall, S: |
| mdtA          | 31C |       |       |      | LowEfficiency, CtIsSmall, S: |
| mdtE/yhiU     | 31C | 28.7  | 87.33 | 1.98 |                              |
| mecA          | 31C | 29.78 | 74.77 | 2.08 |                              |
| mefA          | 31C | 15.08 | 80.62 | 2.05 | MultipleMeltPeaks            |
| mepA          | 31C |       |       |      | NoAmplification              |
| mexA          | 31C |       |       |      | CurveFitFailed               |
| mexD          | 31C |       |       |      | CurveFitFailed               |
| mexE          | 31C | 35.06 | 92.18 | 1.84 | MultipleMeltPeaks            |
| mexF          | 31C | 24.55 | 87.6  | 1.98 |                              |
| mphA-01       | 31C | 30.95 | 88.1  | 1.88 |                              |
| mphA-02       | 31C | 30.12 | 90.18 | 1.78 |                              |
| mphB          | 31C |       |       |      | LowEfficiency, CtIsSmall, S: |
| mphC          | 31C |       |       |      | NoAmplification              |
| msrA-01       | 31C | 30.63 | 76.48 | 2.04 |                              |
| msrC-01       | 31C |       |       |      | NoAmplification              |
| mtrC-01       | 31C |       |       |      | CurveFitFailed               |
| mtrC-02       | 31C | 32.51 | 78.42 | 1.88 | MultipleMeltPeaks            |
| mtrD-02       | 31C | 25.97 | 82.18 | 2.03 | MultipleMeltPeaks            |
| mtrD-03       | 31C | 26.19 | 82.04 | 1.91 |                              |
| NDM1          | 31C |       |       |      | CurveFitFailed               |
| nimE          | 31C |       |       |      | LowEfficiency, CtIsSmall, S: |
| nisB          | 31C | 34.37 | 76.5  | 1.96 |                              |
| oleC          | 31C | 29.06 | 88.85 | 1.84 |                              |
| oprD          | 31C | 26.49 | 91.95 | 1.93 |                              |
| oprJ          | 31C | 26.73 | 89.87 | 1.94 |                              |
| pbp           | 31C |       |       |      | LowEfficiency, CtIsSmall, S: |
| pbp2x         | 31C |       |       |      | NoAmplification              |
| Pbp5          | 31C |       |       |      | CurveFitFailed               |
| penA          | 31C | 36.06 | 87.8  | 1.85 |                              |
| pikR1         | 31C | 34.87 | 92.05 | 1.85 |                              |
| pikR2         | 31C | 33.26 | 82.84 | 2.07 | MultipleMeltPeaks            |
| pmrA          | 31C | 21.35 | 79.12 | 2.12 |                              |
| pncA          | 31C | 31.9  | 89.13 | 1.9  |                              |
| putative mult | 31C | 36.18 | 76.92 | 1.9  | MultipleMeltPeaks            |
| qac           | 31C |       |       |      | CurveFitFailed               |
| qacA          | 31C |       |       |      | LowEfficiency, CtIsSmall, S: |
| qacA/qacB     | 31C |       |       |      | LowEfficiency, CtIsSmall, S: |
| qacEdelta1-0  | 31C |       |       |      | CurveFitFailed               |
| qacEdelta1-0  | 31C | 29.18 | 85.56 | 2    |                              |
| qacH-01       | 31C | 33.61 | 77.13 | 1.92 | MultipleMeltPeaks            |
| qacH-02       | 31C | 35.98 | 84.05 | 1.69 |                              |
| qnrA          | 31C |       |       |      | LowEfficiency, CtIsSmall, Ci |

|              |     |       |       |      |                                          |
|--------------|-----|-------|-------|------|------------------------------------------|
| rarD-02      | 31C | 29.89 | 83.42 | 1.89 | MultipleMeltPeaks                        |
| sat4         | 31C |       |       |      | LowEfficiency, CtIsSmall, S <sub>e</sub> |
| sdeB         | 31C |       |       |      | LowEfficiency, CtIsSmall, S <sub>e</sub> |
| spcN-01      | 31C |       |       |      | LowEfficiency, CtIsSmall, S <sub>e</sub> |
| speA         | 31C |       |       |      | CurveFitFailed                           |
| str          | 31C |       |       |      | LowEfficiency, CtIsSmall, S <sub>e</sub> |
| strA         | 31C |       |       |      | LowEfficiency, CtIsSmall, S <sub>e</sub> |
| strB         | 31C |       |       |      | CurveFitFailed                           |
| sul1         | 31C | 34.45 | 89.56 | 1.76 |                                          |
| sul2         | 31C | 28.86 | 85.86 | 1.98 |                                          |
| sulA/foIP-01 | 31C | 20.16 | 81.29 | 1.98 |                                          |
| sulA/foIP-03 | 31C | 20.68 | 83.97 | 1.97 |                                          |
| tet(32)      | 31C |       |       |      | LowEfficiency, CtIsSmall, S <sub>e</sub> |
| tet(34)      | 31C | 36.53 | 74.6  | 1.96 |                                          |
| tet(35)      | 31C |       |       |      | LowEfficiency, CtIsSmall, S <sub>e</sub> |
| tet(36)-A    | 31C |       |       |      | CurveFitFailed                           |
| tet(36)-B    | 31C |       |       |      | LowEfficiency, CtIsSmall, S <sub>e</sub> |
| tet(37)      | 31C | 22.09 | 76.59 | 2    |                                          |
| tetA-01      | 31C | 32.15 | 85.18 | 1.92 |                                          |
| tetA-02      | 31C | 32.65 | 89.44 | 1.95 |                                          |
| tetB-01      | 31C | 22.48 | 79.35 | 1.72 |                                          |
| tetB-02      | 31C | 22.55 | 79.8  | 2    |                                          |
| tetC-01      | 31C | 22.64 | 74.91 | 1.85 |                                          |
| tetC-02      | 31C | 22.33 | 76.04 | 1.99 |                                          |
| tetD-01      | 31C |       |       |      | LowEfficiency, CtIsSmall, S <sub>e</sub> |
| tetD-02      | 31C |       |       |      | CurveFitFailed                           |
| tetE         | 31C |       |       |      | LowEfficiency, CtIsSmall, S <sub>e</sub> |
| tetG-01      | 31C | 33.46 | 91.05 | 2.03 |                                          |
| tetG-02      | 31C | 32.01 | 83.74 | 1.93 | MultipleMeltPeaks                        |
| tetH         | 31C |       |       |      | LowEfficiency, CtIsSmall, S <sub>e</sub> |
| tetJ         | 31C |       |       |      | LowEfficiency, CtIsSmall, S <sub>e</sub> |
| tetK         | 31C |       |       |      | LowEfficiency, CtIsSmall, S <sub>e</sub> |
| tetL-01      | 31C |       |       |      | LowEfficiency, CtIsSmall, S <sub>e</sub> |
| tetL-02      | 31C | 36.09 | 85.41 | 1.77 | MultipleMeltPeaks                        |
| tetM-01      | 31C | 16.46 | 76.35 | 2.03 |                                          |
| tetM-02      | 31C | 16.62 | 77.66 | 2.08 |                                          |
| tetO-01      | 31C | 17.5  | 77.09 | 2.11 |                                          |
| tetPA        | 31C |       |       |      | CurveFitFailed                           |
| tetPB-01     | 31C | 37.21 | 83.29 | 1.89 |                                          |
| tetPB-02     | 31C | 30.79 | 84.98 | 2.04 |                                          |
| tetPB-03     | 31C |       |       |      | LowEfficiency, CtIsSmall, S <sub>e</sub> |
| tetPB-05     | 31C |       |       |      | NoAmplification                          |
| tetQ         | 31C | 24.17 | 77.3  | 2.04 |                                          |
| tetR-02      | 31C | 30.09 | 90    | 1.62 |                                          |
| tetR-03      | 31C | 23.03 | 76.3  | 1.99 |                                          |
| tetS         | 31C |       |       |      | LowEfficiency, CtIsSmall, S <sub>e</sub> |

|             |     |       |       |      |                                          |
|-------------|-----|-------|-------|------|------------------------------------------|
| tetT        | 31C |       |       |      | LowEfficiency, CtIsSmall, S <sub>e</sub> |
| tetU-01     | 31C |       |       |      | LowEfficiency, CtIsSmall, S <sub>e</sub> |
| tetV        | 31C |       |       |      | LowEfficiency, CtIsSmall, S <sub>e</sub> |
| tetW-01     | 31C |       |       |      | LowEfficiency, CtIsSmall, S <sub>e</sub> |
| tetX        | 31C | 29.7  | 75.71 | 1.99 |                                          |
| tnpA-01     | 31C |       |       |      | LowEfficiency, CtIsSmall, S <sub>e</sub> |
| tnpA-02     | 31C | 37.87 | 84.19 | 1.63 |                                          |
| tnpA-03     | 31C | 32.86 | 77.24 | 1.72 |                                          |
| tnpA-04     | 31C | 29.67 | 82.31 | 1.91 |                                          |
| tnpA-05     | 31C | 26.08 | 80.53 | 1.71 |                                          |
| tnpA-07     | 31C |       |       |      | LowEfficiency, CtIsSmall, S <sub>e</sub> |
| tolC-01     | 31C | 35.9  | 83.55 | 1.94 |                                          |
| tolC-02     | 31C | 31.46 | 78.41 | 1.99 | MultipleMeltPeaks                        |
| tolC-03     | 31C | 29.71 | 86.12 | 1.96 |                                          |
| Tp614       | 31C |       |       |      | BadR2, LowEfficiency, CtIsS              |
| ttgA        | 31C |       |       |      | CurveFitFailed                           |
| ttgB        | 31C |       |       |      | LowEfficiency, CtIsSmall, S <sub>e</sub> |
| vanA        | 31C |       |       |      | LowEfficiency, CtIsSmall, S <sub>e</sub> |
| vanB-01     | 31C | 31.81 | 84.17 | 1.59 | MultipleMeltPeaks                        |
| vanC-01     | 31C |       |       |      | LowEfficiency, CtIsSmall, S <sub>e</sub> |
| vanC-02     | 31C |       |       |      | CurveFitFailed                           |
| vanC-03     | 31C | 26.92 | 91.58 | 1.98 |                                          |
| vanC1       | 31C |       |       |      | NoAmplification                          |
| vanC2/vanC3 | 31C | 35.52 | 84.63 | 2    | MultipleMeltPeaks                        |
| vanG        | 31C |       |       |      | LowEfficiency, CtIsSmall, C <sub>i</sub> |
| vanHB       | 31C | 33.4  | 89.81 | 1.89 |                                          |
| vanHD       | 31C | 33.99 | 88.3  | 1.79 |                                          |
| vanRA-01    | 31C |       |       |      | LowEfficiency, CtIsSmall, S <sub>e</sub> |
| vanRA-02    | 31C |       |       |      | LowEfficiency, CtIsSmall, S <sub>e</sub> |
| vanRB       | 31C | 31.06 | 85.72 | 2.11 |                                          |
| vanRC       | 31C |       |       |      | CurveFitFailed                           |
| vanRC4      | 31C |       |       |      | CurveFitFailed                           |
| vanRD       | 31C |       |       |      | LowEfficiency, CtIsSmall, C <sub>i</sub> |
| vanSA       | 31C |       |       |      | LowEfficiency, CtIsSmall, S <sub>e</sub> |
| vanSB       | 31C | 30.49 | 73.89 | 1.93 |                                          |
| vanSC-01    | 31C | 32.78 | 77.51 | 2.13 | MultipleMeltPeaks                        |
| vanSC-02    | 31C |       |       |      | NoAmplification                          |
| vanTC-01    | 31C |       |       |      | LowEfficiency, CtIsSmall, S <sub>e</sub> |
| vanTC-02    | 31C | 32.29 | 86.43 | 1.84 |                                          |
| vanTE       | 31C |       |       |      | CurveFitFailed                           |
| vanTG       | 31C |       |       |      | CurveFitFailed                           |
| vanWB       | 31C |       |       |      | LowEfficiency, CtIsSmall, C <sub>i</sub> |
| vanWG       | 31C |       |       |      | NoAmplification                          |
| vanXA       | 31C |       |       |      | LowEfficiency, CtIsSmall, S <sub>e</sub> |
| vanXB       | 31C |       |       |      | LowEfficiency, CtIsSmall, S <sub>e</sub> |
| vanXD       | 31C | 37.43 | 73.68 | 1.94 |                                          |

|              |     |       |       |      |                              |
|--------------|-----|-------|-------|------|------------------------------|
| vanYB        | 31C | 35.4  | 82.78 | 1.94 |                              |
| vanYD-01     | 31C | 31.11 | 88.79 | 1.75 |                              |
| vanYD-02     | 31C |       |       |      | LowEfficiency, CtIsSmall, S: |
| vatB-01      | 31C |       |       |      | CurveFitFailed               |
| vatB-02      | 31C | 34.56 | 86.25 | 1.86 |                              |
| vatC-01      | 31C | 34.21 | 81.29 | 1.96 |                              |
| vatC-02      | 31C |       |       |      | CurveFitFailed               |
| vatE-01      | 31C |       |       |      | CurveFitFailed               |
| vatE-02      | 31C |       |       |      | LowEfficiency, CtIsSmall, S: |
| vgaA-01      | 31C |       |       |      | CurveFitFailed               |
| vgaA-02      | 31C |       |       |      | LowEfficiency, CtIsSmall, S: |
| vgb-01       | 31C |       |       |      | CurveFitFailed               |
| vgbB-01      | 31C | 33.69 | 82.9  | 1.82 |                              |
| vgbB-02      | 31C |       |       |      | LowEfficiency, CtIsSmall, S: |
| yceE/mdtG-0  | 31C | 27.63 | 80.65 | 2.06 |                              |
| yceE/mdtG-0  | 31C |       |       |      | LowEfficiency, CtIsSmall, Ci |
| yceL/mdtH-0  | 31C | 32.37 | 83.25 | 1.85 | MultipleMeltPeaks            |
| yceL/mdtH-0  | 31C | 27.82 | 82.41 | 1.92 |                              |
| yceL/mdtH-0  | 31C | 28.39 | 79.1  | 1.94 |                              |
| yidY/mdtL-01 | 31C | 32.25 | 85.61 | 1.86 |                              |
| yidY/mdtL-02 | 31C | 29.54 | 79.72 | 1.88 |                              |































| Assay          | Sample | Ct | Tm    | Efficiency | flag                        |
|----------------|--------|----|-------|------------|-----------------------------|
| 16S rRNA       | 32A    |    | 16.64 | 82.17      | 2.02                        |
| aac            | 32A    |    | 30.03 | 87.56      | 1.87 MultipleMeltPeaks      |
| aac(6')-Ib(akz | 32A    |    | 34.22 | 75.65      | 1.98                        |
| aac(6')-Ib(akz | 32A    |    | 28.62 | 86.07      | 1.98                        |
| aac(6')-Ib(akz | 32A    |    | 30.49 | 82.82      | 1.97 MultipleMeltPeaks      |
| aac(6')-II     | 32A    |    | 31    | 86.3       | 1.71 MultipleMeltPeaks      |
| aac(6')I1      | 32A    |    | 33.87 | 87.69      | 1.87                        |
| aacA/aphD      | 32A    |    |       |            | CurveFitFailed              |
| aacC           | 32A    |    | 27.6  | 91.76      | 1.94 MultipleMeltPeaks      |
| aacC1          | 32A    |    |       |            | LowEfficiency, CtIsSmall, S |
| aacC2          | 32A    |    |       |            | LowEfficiency, CtIsSmall, C |
| aacC4          | 32A    |    | 31.52 | 89.09      | 1.94                        |
| aadA-01        | 32A    |    |       |            | LowEfficiency, CtIsSmall, S |
| aadA-02        | 32A    |    | 34.29 | 80.36      | 1.91                        |
| aadA-1-01      | 32A    |    | 34.89 | 88.39      | 1.9 MultipleMeltPeaks       |
| aadA-1-02      | 32A    |    |       |            | CurveFitFailed              |
| aadA1          | 32A    |    | 33.7  | 84.86      | 1.91                        |
| aadA2-01       | 32A    |    | 35.52 | 83.97      | 1.82                        |
| aadA2-02       | 32A    |    | 32.02 | 75.3       | 1.99                        |
| aadA2-03       | 32A    |    |       |            | LowEfficiency, CtIsSmall, C |
| aadA5-01       | 32A    |    | 33.19 | 88.47      | 1.92                        |
| aadA5-02       | 32A    |    | 30.83 | 83.14      | 2 MultipleMeltPeaks         |
| aadA9-01       | 32A    |    | 35.25 | 88.01      | 1.83 MultipleMeltPeaks      |
| aadA9-02       | 32A    |    | 36.92 | 90.05      | 1.95                        |
| aadD           | 32A    |    |       |            | LowEfficiency, CtIsSmall, C |
| aadE           | 32A    |    |       |            | CurveFitFailed              |
| acrA-01        | 32A    |    | 29.51 | 88.69      | 1.99                        |
| acrA-02        | 32A    |    | 33.08 | 87.83      | 1.89 MultipleMeltPeaks      |
| acrA-03        | 32A    |    | 34.07 | 90.07      | 1.78                        |
| acrA-04        | 32A    |    | 28.85 | 86.9       | 1.97 MultipleMeltPeaks      |
| acrA-05        | 32A    |    | 31.2  | 88.28      | 1.97                        |
| acrB-01        | 32A    |    |       |            | BadR2, LowEfficiency, CtIsS |
| acrF           | 32A    |    | 30.03 | 85.19      | 2.05 MultipleMeltPeaks      |
| acrR-01        | 32A    |    | 31.46 | 81.05      | 1.92 MultipleMeltPeaks      |
| acrR-02        | 32A    |    | 31.55 | 83.13      | 1.98                        |
| Actin          | 32A    |    | 20.13 | 87.11      | 2                           |
| adeA           | 32A    |    | 36.2  | 85.83      | 1.83 MultipleMeltPeaks      |
| ampC-01        | 32A    |    | 30    | 84.36      | 1.98                        |
| ampC-02        | 32A    |    |       |            | CurveFitFailed              |
| ampC-04        | 32A    |    | 31.11 | 79.03      | 1.84                        |
| ampC-05        | 32A    |    | 38.47 | 86.03      | 1.67 MultipleMeltPeaks      |
| ampC-06        | 32A    |    |       |            | CurveFitFailed              |
| ampC-07        | 32A    |    | 33.33 | 82.29      | 1.87 MultipleMeltPeaks      |
| ampC-09        | 32A    |    | 31.45 | 86.32      | 1.88 MultipleMeltPeaks      |
| ampC/blaDH     | 32A    |    | 27.92 | 84.75      | 2.01                        |

|                            |     |       |       |      |                                          |
|----------------------------|-----|-------|-------|------|------------------------------------------|
| aph                        | 32A |       |       |      | CurveFitFailed                           |
| aph(2')-Id-01              | 32A |       |       |      | CurveFitFailed                           |
| aph(2')-Id-02              | 32A |       |       |      | CurveFitFailed                           |
| aph6ia                     | 32A |       |       |      | CurveFitFailed                           |
| aphA1(aka k <sub>a</sub> ) | 32A |       |       |      | CurveFitFailed                           |
| bacA-01                    | 32A | 38.08 | 77.59 | 1.77 | MultipleMeltPeaks                        |
| bacA-02                    | 32A | 33.51 | 88.24 | 1.81 |                                          |
| BETA-globin                | 32A | 22.12 | 83.93 | 2.03 |                                          |
| bla-ACC-1                  | 32A | 33.71 | 83.12 | 1.91 | MultipleMeltPeaks                        |
| bla-L1                     | 32A | 29.33 | 85.48 | 2.04 |                                          |
| bla1                       | 32A |       |       |      | LowEfficiency, CtIsSmall, C <sub>i</sub> |
| blaCMY                     | 32A | 34.33 | 80.35 | 1.92 | MultipleMeltPeaks                        |
| blaCMY2-01                 | 32A | 35.19 | 76.1  | 1.92 | MultipleMeltPeaks                        |
| blaCMY2-02                 | 32A | 27.59 | 84.98 | 2.01 |                                          |
| blaCTX-M-01                | 32A | 31.42 | 91.13 | 1.73 | MultipleMeltPeaks                        |
| blaCTX-M-02                | 32A | 30.34 | 85.79 | 1.99 | MultipleMeltPeaks                        |
| blaCTX-M-03                | 32A |       |       |      | BadR2, LowEfficiency, CtIsS              |
| blaCTX-M-04                | 32A | 29.72 | 89.42 | 2.17 | MultipleMeltPeaks                        |
| blaCTX-M-05                | 32A | 33.26 | 76.2  | 1.78 |                                          |
| blaCTX-M-06                | 32A |       |       |      | BadR2, LowEfficiency, CtIsS              |
| blaGES                     | 32A |       |       |      | CurveFitFailed                           |
| blaIMP-01                  | 32A | 37.34 | 74.5  | 1.91 |                                          |
| blaIMP-02                  | 32A |       |       |      | CurveFitFailed                           |
| blaMOX/blaC                | 32A | 35.21 | 81.64 | 1.91 |                                          |
| blaOCH                     | 32A | 29.28 | 83.34 | 1.79 |                                          |
| blaOKP                     | 32A |       |       |      | NoAmplification                          |
| blaOXA1/blaC               | 32A |       |       |      | LowEfficiency, CtIsSmall, C <sub>i</sub> |
| blaOXA10-01                | 32A |       |       |      | LowEfficiency, CtIsSmall, C <sub>i</sub> |
| blaOXA10-02                | 32A |       |       |      | LowEfficiency, CtIsSmall, S <sub>c</sub> |
| blaOXY                     | 32A | 27.75 | 89.19 | 1.93 |                                          |
| blaPAO                     | 32A |       |       |      | CurveFitFailed                           |
| blaPER                     | 32A |       |       |      | CurveFitFailed                           |
| blaPSE                     | 32A |       |       |      | CurveFitFailed                           |
| blaROB                     | 32A |       |       |      | CurveFitFailed                           |
| blaSFO                     | 32A | 29.51 | 87.11 | 1.97 |                                          |
| blaSHV-01                  | 32A | 32.11 | 89.46 | 2.06 |                                          |
| blaSHV-02                  | 32A | 37.65 | 83.76 | 1.82 | MultipleMeltPeaks                        |
| blaTEM                     | 32A | 31.99 | 87.1  | 2    |                                          |
| blaTLA                     | 32A |       |       |      | CurveFitFailed                           |
| blaVEB                     | 32A |       |       |      | LowEfficiency, CtIsSmall, C <sub>i</sub> |
| blaVIM                     | 32A |       |       |      | LowEfficiency, CtIsSmall, S <sub>c</sub> |
| blaZ                       | 32A |       |       |      | CurveFitFailed                           |
| carB                       | 32A | 33.37 | 88.83 | 1.89 | MultipleMeltPeaks                        |
| catA1                      | 32A |       |       |      | NoAmplification                          |
| catB3                      | 32A | 32.89 | 79.31 | 1.98 |                                          |
| catB8                      | 32A | 28.63 | 84.58 | 1.96 | MultipleMeltPeaks                        |

|            |     |       |       |      |                              |
|------------|-----|-------|-------|------|------------------------------|
| ceoA       | 32A | 27.75 | 82.04 | 1.93 | MultipleMeltPeaks            |
| cepA       | 32A |       |       |      | CurveFitFailed               |
| cfiA       | 32A | 31.48 | 86.08 | 1.99 |                              |
| cfr        | 32A |       |       |      | CurveFitFailed               |
| cfxA       | 32A | 22.36 | 77.59 | 2.08 |                              |
| cmeA       | 32A | 35.31 | 85.01 | 1.8  |                              |
| cmlA1-01   | 32A | 35.56 | 87.4  | 1.95 |                              |
| cmlA1-02   | 32A | 36.63 | 81.93 | 1.91 | MultipleMeltPeaks            |
| cmr        | 32A |       |       |      | LowEfficiency, CtIsSmall, S: |
| cmx(A)     | 32A | 27.07 | 86.97 | 2.02 | MultipleMeltPeaks            |
| cphA-01    | 32A | 30.3  | 86.18 | 1.98 | MultipleMeltPeaks            |
| cphA-02    | 32A | 31.25 | 82.4  | 1.95 |                              |
| dfrA1      | 32A | 38.15 | 79.15 | 1.78 |                              |
| dfrA12     | 32A | 35.87 | 85.97 | 1.73 | MultipleMeltPeaks            |
| emrD       | 32A | 29.6  | 87.83 | 1.92 |                              |
| ereA       | 32A | 31.17 | 82.53 | 1.96 |                              |
| ereB       | 32A |       |       |      | LowEfficiency, CtIsSmall, S: |
| erm(34)    | 32A | 37.21 | 79.62 | 1.81 | MultipleMeltPeaks            |
| erm(35)    | 32A |       |       |      | LowEfficiency, CtIsSmall, S: |
| erm(36)    | 32A | 29.87 | 86.32 | 2.14 |                              |
| ermA       | 32A |       |       |      | LowEfficiency, CtIsSmall, C: |
| ermA/ermTR | 32A | 38.42 | 87.77 | 1.77 | MultipleMeltPeaks            |
| ermB       | 32A | 22.59 | 75.04 | 2.14 |                              |
| ermC       | 32A |       |       |      | LowEfficiency, CtIsSmall, S: |
| ermF       | 32A | 24.52 | 74.63 | 2.02 |                              |
| ermJ/ermD  | 32A |       |       |      | CurveFitFailed               |
| ermK-01    | 32A |       |       |      | CurveFitFailed               |
| ermK-02    | 32A | 33.39 | 76.91 | 1.92 | MultipleMeltPeaks            |
| ermT-01    | 32A |       |       |      | LowEfficiency, CtIsSmall, C: |
| ermT-02    | 32A | 35.77 | 80.03 | 1.96 |                              |
| ermX       | 32A | 28.39 | 83.61 | 1.86 |                              |
| ermY       | 32A |       |       |      | LowEfficiency, CtIsSmall, S: |
| fabK       | 32A | 22.14 | 78.61 | 2.23 |                              |
| floR       | 32A |       |       |      | LowEfficiency, CtIsSmall, C: |
| folA       | 32A |       |       |      | NoAmplification              |
| fosB       | 32A |       |       |      | CurveFitFailed               |
| fosX       | 32A |       |       |      | CurveFitFailed               |
| fox5       | 32A | 25.75 | 87.57 | 2.01 | MultipleMeltPeaks            |
| imiR       | 32A |       |       |      | LowEfficiency, CtIsSmall, S: |
| ImrA-01    | 32A |       |       |      | LowEfficiency, CtIsSmall, S: |
| intl       | 32A | 28.59 | 84.73 | 1.96 |                              |
| intl1      | 32A | 19.33 | 87.45 | 2.08 |                              |
| IS613      | 32A | 24.15 | 79.67 | 2.08 |                              |
| lnuA-01    | 32A |       |       |      | CurveFitFailed               |
| lnuB-01    | 32A |       |       |      | CurveFitFailed               |
| lnuB-02    | 32A |       |       |      | LowEfficiency, CtIsSmall, S: |

|                |     |       |       |      |                              |
|----------------|-----|-------|-------|------|------------------------------|
| lnuC           | 32A | 36.24 | 84.09 | 1.67 |                              |
| marR-01        | 32A | 33.59 | 90.51 | 1.87 |                              |
| matA/mel       | 32A | 19.61 | 77.71 | 2.1  |                              |
| mdet1          | 32A |       |       |      | LowEfficiency, CtIsSmall, Ci |
| mdtA           | 32A | 36.56 | 81.91 | 1.74 |                              |
| mdtE/yhiU      | 32A | 35.94 | 85.99 | 1.81 |                              |
| mecA           | 32A |       |       |      | LowEfficiency, CtIsSmall, S; |
| mefA           | 32A | 18.94 | 80.55 | 2.01 |                              |
| mepA           | 32A | 30.56 | 84.75 | 2.05 | MultipleMeltPeaks            |
| mexA           | 32A |       |       |      | CurveFitFailed               |
| mexD           | 32A | 32.97 | 86.17 | 1.98 |                              |
| mexE           | 32A | 34.09 | 82.44 | 1.92 | MultipleMeltPeaks            |
| mexF           | 32A | 26.97 | 87.62 | 2.18 |                              |
| mphA-01        | 32A | 29.36 | 86.85 | 2    |                              |
| mphA-02        | 32A | 29.38 | 86.68 | 2.16 |                              |
| mphB           | 32A | 36    | 88.28 | 1.82 |                              |
| mphC           | 32A |       |       |      | CurveFitFailed               |
| msrA-01        | 32A |       |       |      | LowEfficiency, CtIsSmall, Ci |
| msrC-01        | 32A |       |       |      | NoAmplification              |
| mtrC-01        | 32A |       |       |      | CurveFitFailed               |
| mtrC-02        | 32A | 32.63 | 84.35 | 2    |                              |
| mtrD-02        | 32A | 26.81 | 85.2  | 2    |                              |
| mtrD-03        | 32A | 28.35 | 89.05 | 1.82 |                              |
| NDM1           | 32A |       |       |      | CurveFitFailed               |
| nimE           | 32A |       |       |      | BadR2, LowEfficiency, CtIsS  |
| nisB           | 32A |       |       |      | CurveFitFailed               |
| oleC           | 32A | 34.41 | 84.54 | 1.87 | MultipleMeltPeaks            |
| oprD           | 32A | 27.36 | 91.88 | 1.96 |                              |
| oprJ           | 32A | 32.21 | 88.12 | 1.98 |                              |
| pbp            | 32A | 33.81 | 81.79 | 1.93 | MultipleMeltPeaks            |
| pbp2x          | 32A | 24.15 | 75.25 | 2.13 |                              |
| Pbp5           | 32A |       |       |      | LowEfficiency, CtIsSmall, S; |
| penA           | 32A | 35.62 | 84.08 | 1.77 | MultipleMeltPeaks            |
| pikR1          | 32A | 34.43 | 82.8  | 1.92 | MultipleMeltPeaks            |
| pikR2          | 32A | 30.03 | 89.31 | 2.1  | MultipleMeltPeaks            |
| pmrA           | 32A | 21.22 | 79.55 | 2.14 |                              |
| pncA           | 32A | 23.83 | 89.13 | 1.94 |                              |
| putative multi | 32A | 35.57 | 76.82 | 1.92 | MultipleMeltPeaks            |
| qac            | 32A | 37.44 | 84.89 | 1.85 | MultipleMeltPeaks            |
| qacA           | 32A |       |       |      | CurveFitFailed               |
| qacA/qacB      | 32A |       |       |      | CurveFitFailed               |
| qacEdelta1-0   | 32A |       |       |      | LowEfficiency, CtIsSmall, Ci |
| qacEdelta1-0   | 32A | 34    | 86.49 | 1.96 |                              |
| qacH-01        | 32A | 30.2  | 88.27 | 1.96 |                              |
| qacH-02        | 32A | 31.94 | 84.02 | 1.75 |                              |
| qnrA           | 32A | 33.87 | 79.87 | 2.02 |                              |



|              |     |       |       |      |                              |
|--------------|-----|-------|-------|------|------------------------------|
| rarD-02      | 32A | 35.38 | 85.87 | 1.86 |                              |
| sat4         | 32A |       |       |      | CurveFitFailed               |
| sdeB         | 32A |       |       |      | CurveFitFailed               |
| spcN-01      | 32A |       |       |      | LowEfficiency, CtIsSmall, S: |
| speA         | 32A |       |       |      | CurveFitFailed               |
| str          | 32A |       |       |      | LowEfficiency, CtIsSmall, Ci |
| strA         | 32A |       |       |      | LowEfficiency, CtIsSmall, Ci |
| strB         | 32A | 28.63 | 83.51 | 1.97 |                              |
| sul1         | 32A | 32.99 | 89.53 | 1.92 |                              |
| sul2         | 32A |       |       |      | LowEfficiency, CtIsSmall, S: |
| sulA/foIP-01 | 32A | 20    | 80.8  | 2.03 |                              |
| sulA/foIP-03 | 32A | 20.43 | 83.15 | 2.05 |                              |
| tet(32)      | 32A | 25.33 | 81.3  | 1.99 |                              |
| tet(34)      | 32A | 30.76 | 75.83 | 2.02 |                              |
| tet(35)      | 32A |       |       |      | CurveFitFailed               |
| tet(36)-A    | 32A | 33.93 | 81.87 | 1.9  |                              |
| tet(36)-B    | 32A |       |       |      | CurveFitFailed               |
| tet(37)      | 32A | 31.16 | 77.58 | 1.99 | MultipleMeltPeaks            |
| tetA-01      | 32A | 29.45 | 85.16 | 1.93 |                              |
| tetA-02      | 32A | 31.57 | 89.9  | 2.01 | MultipleMeltPeaks            |
| tetB-01      | 32A | 23.97 | 87.7  | 1.99 | MultipleMeltPeaks            |
| tetB-02      | 32A | 23.98 | 79.73 | 2.01 |                              |
| tetC-01      | 32A | 24.59 | 75.34 | 2.01 |                              |
| tetC-02      | 32A | 24.29 | 76.13 | 2.09 |                              |
| tetD-01      | 32A |       |       |      | CurveFitFailed               |
| tetD-02      | 32A | 34.81 | 76.7  | 2.05 |                              |
| tetE         | 32A |       |       |      | CurveFitFailed               |
| tetG-01      | 32A | 34.75 | 83.26 | 2.02 | MultipleMeltPeaks            |
| tetG-02      | 32A | 31.24 | 89.81 | 1.95 |                              |
| tetH         | 32A |       |       |      | LowEfficiency, CtIsSmall, Ci |
| tetJ         | 32A |       |       |      | CurveFitFailed               |
| tetK         | 32A |       |       |      | CurveFitFailed               |
| tetL-01      | 32A |       |       |      | CurveFitFailed               |
| tetL-02      | 32A | 31.4  | 85.2  | 1.93 |                              |
| tetM-01      | 32A | 19.82 | 76.25 | 2.02 |                              |
| tetM-02      | 32A | 20.1  | 77.58 | 2.07 |                              |
| tetO-01      | 32A | 22    | 76.93 | 2.1  |                              |
| tetPA        | 32A |       |       |      | LowEfficiency, CtIsSmall, Ci |
| tetPB-01     | 32A | 34.84 | 89.07 | 1.77 |                              |
| tetPB-02     | 32A | 28.25 | 84.71 | 2.06 |                              |
| tetPB-03     | 32A |       |       |      | CurveFitFailed               |
| tetPB-05     | 32A |       |       |      | LowEfficiency, CtIsSmall, S: |
| tetQ         | 32A | 24.81 | 77.23 | 2.05 |                              |
| tetR-02      | 32A | 30.84 | 89.72 | 1.88 | MultipleMeltPeaks            |
| tetR-03      | 32A | 23.94 | 76.25 | 2    |                              |
| tetS         | 32A | 34.99 | 86.72 | 1.96 |                              |

|             |     |       |       |      |                              |
|-------------|-----|-------|-------|------|------------------------------|
| tetT        | 32A |       |       |      | LowEfficiency, CtIsSmall, S: |
| tetU-01     | 32A |       |       |      | CurveFitFailed               |
| tetV        | 32A |       |       |      | CurveFitFailed               |
| tetW-01     | 32A | 22.69 | 82    | 2.01 |                              |
| tetX        | 32A |       |       |      | BadR2, CtIsSmall, Saturatio  |
| tnpA-01     | 32A |       |       |      | LowEfficiency, CtIsSmall, S: |
| tnpA-02     | 32A | 30.79 | 86.9  | 1.82 |                              |
| tnpA-03     | 32A | 32.5  | 75.06 | 2.1  |                              |
| tnpA-04     | 32A |       |       |      | CurveFitFailed               |
| tnpA-05     | 32A | 29.39 | 80.78 | 1.92 |                              |
| tnpA-07     | 32A |       |       |      | LowEfficiency, CtIsSmall, Ci |
| tolC-01     | 32A | 34.88 | 81.14 | 1.84 |                              |
| tolC-02     | 32A | 30.05 | 87.8  | 1.92 |                              |
| tolC-03     | 32A | 28.8  | 88.24 | 1.97 | MultipleMeltPeaks            |
| Tp614       | 32A | 35.66 | 73.18 | 1.9  | MultipleMeltPeaks            |
| ttgA        | 32A |       |       |      | CurveFitFailed               |
| ttgB        | 32A | 35.73 | 80.91 | 1.89 | MultipleMeltPeaks            |
| vanA        | 32A |       |       |      | LowEfficiency, CtIsSmall, Ci |
| vanB-01     | 32A | 31.3  | 83.84 | 2.07 |                              |
| vanC-01     | 32A |       |       |      | BadR2, LowEfficiency, CtIsS  |
| vanC-02     | 32A |       |       |      | LowEfficiency, CtIsSmall, Ci |
| vanC-03     | 32A | 25.1  | 86.55 | 1.95 | MultipleMeltPeaks            |
| vanC1       | 32A |       |       |      | LowEfficiency, CtIsSmall, S: |
| vanC2/vanC3 | 32A | 31.81 | 78.89 | 2.1  | MultipleMeltPeaks            |
| vanG        | 32A |       |       |      | LowEfficiency, CtIsSmall, Ci |
| vanHB       | 32A | 32.27 | 89.51 | 1.98 |                              |
| vanHD       | 32A | 33.28 | 86.76 | 1.85 |                              |
| vanRA-01    | 32A |       |       |      | LowEfficiency, CtIsSmall, Ci |
| vanRA-02    | 32A |       |       |      | CurveFitFailed               |
| vanRB       | 32A | 32.12 | 87.53 | 2    |                              |
| vanRC       | 32A |       |       |      | LowEfficiency, CtIsSmall, Ci |
| vanRC4      | 32A |       |       |      | LowEfficiency, CtIsSmall, Ci |
| vanRD       | 32A |       |       |      | CurveFitFailed               |
| vanSA       | 32A |       |       |      | CurveFitFailed               |
| vanSB       | 32A | 34.71 | 73.89 | 1.47 | MultipleMeltPeaks            |
| vanSC-01    | 32A | 35.8  | 84.07 | 1.92 |                              |
| vanSC-02    | 32A |       |       |      | NoAmplification              |
| vanTC-01    | 32A |       |       |      | LowEfficiency, CtIsSmall, Ci |
| vanTC-02    | 32A | 31.2  | 86.01 | 1.86 | MultipleMeltPeaks            |
| vanTE       | 32A | 36.24 | 77.67 | 1.82 | MultipleMeltPeaks            |
| vanTG       | 32A |       |       |      | LowEfficiency, CtIsSmall, Ci |
| vanWB       | 32A |       |       |      | LowEfficiency, CtIsSmall, S: |
| vanWG       | 32A |       |       |      | BadR2, LowEfficiency, CtIsS  |
| vanXA       | 32A |       |       |      | LowEfficiency, CtIsSmall, S: |
| vanXB       | 32A |       |       |      | CurveFitFailed               |
| vanXD       | 32A | 31.63 | 75.28 | 2.03 |                              |

|              |     |       |       |      |                              |
|--------------|-----|-------|-------|------|------------------------------|
| vanYB        | 32A | 35.19 | 74.12 | 1.92 | MultipleMeltPeaks            |
| vanYD-01     | 32A | 30.9  | 82.35 | 1.85 | MultipleMeltPeaks            |
| vanYD-02     | 32A |       |       |      | CurveFitFailed               |
| vatB-01      | 32A |       |       |      | CurveFitFailed               |
| vatB-02      | 32A | 31.47 | 80.83 | 2.03 | MultipleMeltPeaks            |
| vatC-01      | 32A | 36.02 | 81.23 | 1.83 |                              |
| vatC-02      | 32A |       |       |      | CurveFitFailed               |
| vatE-01      | 32A | 29.94 | 76.87 | 2.18 |                              |
| vatE-02      | 32A |       |       |      | NoAmplification              |
| vgaA-01      | 32A |       |       |      | LowEfficiency, CtIsSmall, S: |
| vgaA-02      | 32A |       |       |      | LowEfficiency, CtIsSmall, S: |
| vgb-01       | 32A | 35.39 | 88.67 | 1.92 | MultipleMeltPeaks            |
| vgbB-01      | 32A |       |       |      | LowEfficiency, CtIsSmall, S: |
| vgbB-02      | 32A |       |       |      | CurveFitFailed               |
| yceE/mdtG-0  | 32A |       |       |      | CurveFitFailed               |
| yceE/mdtG-0  | 32A | 35.65 | 81.63 | 1.85 |                              |
| yceL/mdtH-0  | 32A | 30.73 | 83.75 | 2.02 | MultipleMeltPeaks            |
| yceL/mdtH-0  | 32A |       |       |      | LowEfficiency, CtIsSmall, Ci |
| yceL/mdtH-0  | 32A | 34.06 | 77.35 | 1.91 | MultipleMeltPeaks            |
| yidY/mdtL-01 | 32A | 29.91 | 83    | 2.01 | MultipleMeltPeaks            |
| yidY/mdtL-02 | 32A |       |       |      | LowEfficiency, CtIsSmall, Ci |































| Assay          | Sample | Ct | Tm    | Efficiency | flag                         |
|----------------|--------|----|-------|------------|------------------------------|
| 16S rRNA       | 32B    |    | 23.03 | 81.99      | 2                            |
| aac            | 32B    |    | 30.16 | 81.42      | 1.8 MultipleMeltPeaks        |
| aac(6')-Ib(akz | 32B    |    |       |            | CurveFitFailed               |
| aac(6')-Ib(akz | 32B    |    | 31.27 | 83.94      | 1.97 MultipleMeltPeaks       |
| aac(6')-Ib(akz | 32B    |    | 32.18 | 87.6       | 1.96 MultipleMeltPeaks       |
| aac(6')-II     | 32B    |    | 33.18 | 86.04      | 1.67 MultipleMeltPeaks       |
| aac(6')I1      | 32B    |    |       |            | NoAmplification              |
| aacA/aphD      | 32B    |    |       |            | CurveFitFailed               |
| aacC           | 32B    |    | 30.1  | 86.06      | 1.89 MultipleMeltPeaks       |
| aacC1          | 32B    |    |       |            | LowEfficiency, CtIsSmall, S: |
| aacC2          | 32B    |    |       |            | NoAmplification              |
| aacC4          | 32B    |    | 33.27 | 82.89      | 1.95 MultipleMeltPeaks       |
| aadA-01        | 32B    |    |       |            | CurveFitFailed               |
| aadA-02        | 32B    |    | 30.29 | 80.47      | 1.94                         |
| aadA-1-01      | 32B    |    | 34.5  | 81.25      | 1.94 MultipleMeltPeaks       |
| aadA-1-02      | 32B    |    |       |            | LowEfficiency, CtIsSmall, C: |
| aadA1          | 32B    |    | 33.91 | 82.36      | 1.99                         |
| aadA2-01       | 32B    |    | 36.27 | 84.82      | 1.8                          |
| aadA2-02       | 32B    |    | 32.04 | 75.36      | 2.01                         |
| aadA2-03       | 32B    |    |       |            | LowEfficiency, CtIsSmall, S: |
| aadA5-01       | 32B    |    | 32.21 | 78.54      | 1.97                         |
| aadA5-02       | 32B    |    | 33.36 | 83.92      | 1.98                         |
| aadA9-01       | 32B    |    |       |            | LowEfficiency, CtIsSmall, S: |
| aadA9-02       | 32B    |    |       |            | CurveFitFailed               |
| aadD           | 32B    |    |       |            | LowEfficiency, CtIsSmall, C: |
| aadE           | 32B    |    |       |            | CurveFitFailed               |
| acrA-01        | 32B    |    | 31.23 | 88.7       | 1.96                         |
| acrA-02        | 32B    |    | 36.2  | 90.62      | 1.82 MultipleMeltPeaks       |
| acrA-03        | 32B    |    |       |            | CurveFitFailed               |
| acrA-04        | 32B    |    | 28.81 | 83.49      | 2.03                         |
| acrA-05        | 32B    |    | 31.08 | 85.1       | 1.98                         |
| acrB-01        | 32B    |    | 35.41 | 75.82      | 2.03                         |
| acrF           | 32B    |    | 31.34 | 82.87      | 2.01 MultipleMeltPeaks       |
| acrR-01        | 32B    |    | 32.88 | 85.12      | 1.88                         |
| acrR-02        | 32B    |    | 37.92 | 84.98      | 1.74 MultipleMeltPeaks       |
| Actin          | 32B    |    | 20.48 | 87.09      | 1.98                         |
| adeA           | 32B    |    | 37.38 | 77.49      | 1.93                         |
| ampC-01        | 32B    |    | 31.57 | 84.48      | 1.99 MultipleMeltPeaks       |
| ampC-02        | 32B    |    | 37.73 | 80.76      | 1.93                         |
| ampC-04        | 32B    |    | 31.91 | 85.87      | 1.84                         |
| ampC-05        | 32B    |    |       |            | CurveFitFailed               |
| ampC-06        | 32B    |    | 33.03 | 84.04      | 1.94                         |
| ampC-07        | 32B    |    | 32.76 | 88.29      | 1.86                         |
| ampC-09        | 32B    |    |       |            | CurveFitFailed               |
| ampC/blaDH     | 32B    |    | 28.5  | 84.79      | 2                            |

|                            |     |       |       |      |                              |
|----------------------------|-----|-------|-------|------|------------------------------|
| aph                        | 32B |       |       |      | LowEfficiency, CtIsSmall, S; |
| aph(2')-Id-01              | 32B |       |       |      | CurveFitFailed               |
| aph(2')-Id-02              | 32B |       |       |      | CurveFitFailed               |
| aph6ia                     | 32B |       |       |      | LowEfficiency, CtIsSmall, C; |
| aphA1(aka k <sub>a</sub> ) | 32B | 35.55 | 77.64 | 1.88 | MultipleMeltPeaks            |
| bacA-01                    | 32B |       |       |      | LowEfficiency, CtIsSmall, C; |
| bacA-02                    | 32B | 35.33 | 84.32 | 1.68 |                              |
| BETA-globin                | 32B | 22.61 | 83.98 | 1.99 |                              |
| bla-ACC-1                  | 32B | 32.38 | 86.06 | 1.92 |                              |
| bla-L1                     | 32B | 29.13 | 85.97 | 1.98 |                              |
| bla1                       | 32B |       |       |      | CurveFitFailed               |
| blaCMY                     | 32B | 35.66 | 76.38 | 1.89 |                              |
| blaCMY2-01                 | 32B | 34.41 | 76.1  | 1.91 | MultipleMeltPeaks            |
| blaCMY2-02                 | 32B | 28.76 | 84.55 | 2.01 |                              |
| blaCTX-M-01                | 32B |       |       |      | CurveFitFailed               |
| blaCTX-M-02                | 32B | 31.64 | 79.82 | 1.89 | MultipleMeltPeaks            |
| blaCTX-M-03                | 32B | 37.66 | 84.29 | 1.79 |                              |
| blaCTX-M-04                | 32B | 34.58 | 85.53 | 1.88 | MultipleMeltPeaks            |
| blaCTX-M-05                | 32B | 32.87 | 77.43 | 1.81 |                              |
| blaCTX-M-06                | 32B |       |       |      | NoAmplification              |
| blaGES                     | 32B |       |       |      | LowEfficiency, CtIsSmall, S; |
| blaIMP-01                  | 32B | 37.81 | 74.76 | 1.98 |                              |
| blaIMP-02                  | 32B |       |       |      | CurveFitFailed               |
| blaMOX/blaC                | 32B | 38.09 | 82.32 | 1.94 |                              |
| blaOCH                     | 32B |       |       |      | NoAmplification              |
| blaOKP                     | 32B |       |       |      | NoAmplification              |
| blaOXA1/blaC               | 32B |       |       |      | CurveFitFailed               |
| blaOXA10-01                | 32B | 38.67 | 78.79 | 1.81 |                              |
| blaOXA10-02                | 32B | 29.05 | 76.53 | 2.07 |                              |
| blaOXY                     | 32B | 33.79 | 87.59 | 1.79 |                              |
| blaPAO                     | 32B | 36.91 | 80.74 | 1.8  | MultipleMeltPeaks            |
| blaPER                     | 32B | 36.92 | 79.08 | 1.82 |                              |
| blaPSE                     | 32B |       |       |      | NoAmplification              |
| blaROB                     | 32B |       |       |      | NoAmplification              |
| blaSFO                     | 32B | 30.92 | 89.45 | 1.89 |                              |
| blaSHV-01                  | 32B | 34.23 | 86.79 | 1.87 | MultipleMeltPeaks            |
| blaSHV-02                  | 32B | 38.41 | 81.9  | 1.87 |                              |
| blaTEM                     | 32B | 27.29 | 79.6  | 2.01 |                              |
| blaTLA                     | 32B |       |       |      | LowEfficiency, CtIsSmall, S; |
| blaVEB                     | 32B |       |       |      | NoAmplification              |
| blaVIM                     | 32B |       |       |      | NoAmplification              |
| blaZ                       | 32B |       |       |      | LowEfficiency, CtIsSmall, S; |
| carB                       | 32B |       |       |      | BadR2, LowEfficiency, CtIsS  |
| catA1                      | 32B |       |       |      | NoAmplification              |
| catB3                      | 32B | 38.12 | 80.01 | 1.82 | MultipleMeltPeaks            |
| catB8                      | 32B | 28.62 | 81.79 | 1.98 |                              |

|            |     |       |       |      |                              |
|------------|-----|-------|-------|------|------------------------------|
| ceoA       | 32B | 27.32 | 82.1  | 1.93 | MultipleMeltPeaks            |
| cepA       | 32B |       |       |      | LowEfficiency, CtIsSmall, S: |
| cfiA       | 32B | 31.45 | 86.02 | 1.99 | MultipleMeltPeaks            |
| cfr        | 32B |       |       |      | LowEfficiency, CtIsSmall, S: |
| cfxA       | 32B | 29.32 | 77.41 | 2.05 |                              |
| cmeA       | 32B | 36.35 | 82.31 | 1.88 |                              |
| cmlA1-01   | 32B | 35.92 | 80.4  | 1.86 | MultipleMeltPeaks            |
| cmlA1-02   | 32B | 34.52 | 84.71 | 1.78 | MultipleMeltPeaks            |
| cmr        | 32B |       |       |      | LowEfficiency, CtIsSmall, S: |
| cmx(A)     | 32B | 27.88 | 86.56 | 2.01 | MultipleMeltPeaks            |
| cphA-01    | 32B | 30.96 | 85.66 | 1.93 | MultipleMeltPeaks            |
| cphA-02    | 32B | 34.69 | 78.05 | 1.94 | MultipleMeltPeaks            |
| dfrA1      | 32B | 37.82 | 78.51 | 1.86 | MultipleMeltPeaks            |
| dfrA12     | 32B | 34.9  | 82.46 | 1.82 | MultipleMeltPeaks            |
| emrD       | 32B | 33.55 | 84.43 | 1.89 |                              |
| ereA       | 32B | 33.13 | 83.17 | 1.95 |                              |
| ereB       | 32B | 33.87 | 85.75 | 2.02 |                              |
| erm(34)    | 32B | 34.92 | 90.23 | 1.87 |                              |
| erm(35)    | 32B |       |       |      | LowEfficiency, CtIsSmall, Ci |
| erm(36)    | 32B | 35.08 | 87.46 | 1.87 |                              |
| ermA       | 32B |       |       |      | CurveFitFailed               |
| ermA/ermTR | 32B |       |       |      | NoAmplification              |
| ermB       | 32B | 25.42 | 75.12 | 2.1  |                              |
| ermC       | 32B | 38.13 | 81.03 | 1.89 |                              |
| ermF       | 32B | 26.95 | 74.61 | 2    |                              |
| ermJ/ermD  | 32B |       |       |      | CurveFitFailed               |
| ermK-01    | 32B | 38.03 | 81.21 | 1.86 | MultipleMeltPeaks            |
| ermK-02    | 32B | 40.98 | 80.28 | 1.54 | MultipleMeltPeaks            |
| ermT-01    | 32B |       |       |      | LowEfficiency, CtIsSmall, S: |
| ermT-02    | 32B | 38.51 | 73.41 | 1.87 | MultipleMeltPeaks            |
| ermX       | 32B | 35.61 | 87.29 | 1.71 |                              |
| ermY       | 32B |       |       |      | CurveFitFailed               |
| fabK       | 32B | 26.05 | 79.39 | 2.08 |                              |
| floR       | 32B |       |       |      | NoAmplification              |
| folA       | 32B |       |       |      | NoAmplification              |
| fosB       | 32B |       |       |      | LowEfficiency, CtIsSmall, S: |
| fosX       | 32B |       |       |      | CurveFitFailed               |
| fox5       | 32B | 27.1  | 87.77 | 1.97 |                              |
| imiR       | 32B |       |       |      | BadR2, LowEfficiency, CtIsS  |
| ImrA-01    | 32B | 39.36 | 79.66 | 1.81 | MultipleMeltPeaks            |
| intl       | 32B | 29.35 | 85.14 | 1.96 |                              |
| intl1      | 32B | 20    | 87.33 | 2.02 |                              |
| IS613      | 32B | 26.26 | 79.68 | 2.03 |                              |
| lnuA-01    | 32B |       |       |      | LowEfficiency, CtIsSmall, S: |
| lnuB-01    | 32B |       |       |      | LowEfficiency, CtIsSmall, S: |
| lnuB-02    | 32B |       |       |      | LowEfficiency, CtIsSmall, Ci |

|                |     |       |       |      |                              |
|----------------|-----|-------|-------|------|------------------------------|
| lnuC           | 32B | 36.92 | 84.22 | 1.67 |                              |
| marR-01        | 32B | 37.82 | 80.71 | 1.83 | MultipleMeltPeaks            |
| matA/mel       | 32B | 26.79 | 77.1  | 2.02 | MultipleMeltPeaks            |
| mdet1          | 32B |       |       |      | LowEfficiency, CtIsSmall, Ci |
| mdtA           | 32B |       |       |      | CurveFitFailed               |
| mdtE/yhiU      | 32B |       |       |      | LowEfficiency, CtIsSmall, Ci |
| mecA           | 32B |       |       |      | LowEfficiency, CtIsSmall, Ci |
| mefA           | 32B | 25.98 | 80.51 | 1.96 |                              |
| mepA           | 32B | 33.27 | 85.41 | 1.95 |                              |
| mexA           | 32B |       |       |      | LowEfficiency, CtIsSmall, Ci |
| mexD           | 32B | 35.62 | 78.63 | 1.98 | MultipleMeltPeaks            |
| mexE           | 32B | 38.05 | 87.43 | 1.87 | MultipleMeltPeaks            |
| mexF           | 32B | 27.71 | 87.52 | 2.09 | MultipleMeltPeaks            |
| mphA-01        | 32B | 32.1  | 86.88 | 1.98 |                              |
| mphA-02        | 32B | 29.71 | 86.34 | 2.12 |                              |
| mphB           | 32B |       |       |      | LowEfficiency, CtIsSmall, Ci |
| mphC           | 32B |       |       |      | CurveFitFailed               |
| msrA-01        | 32B |       |       |      | LowEfficiency, CtIsSmall, Ci |
| msrC-01        | 32B |       |       |      | NoAmplification              |
| mtrC-01        | 32B |       |       |      | LowEfficiency, CtIsSmall, Ci |
| mtrC-02        | 32B | 33.12 | 84.38 | 1.96 |                              |
| mtrD-02        | 32B | 26.98 | 82.99 | 2.03 | MultipleMeltPeaks            |
| mtrD-03        | 32B | 36.55 | 73.15 | 1.76 | MultipleMeltPeaks            |
| NDM1           | 32B |       |       |      | LowEfficiency, CtIsSmall, S: |
| nimE           | 32B | 37.61 | 85.1  | 2.09 | MultipleMeltPeaks            |
| nisB           | 32B | 38.13 | 79.92 | 1.97 |                              |
| oleC           | 32B | 35.61 | 84.06 | 1.85 | MultipleMeltPeaks            |
| oprD           | 32B | 27.77 | 89.6  | 1.97 |                              |
| oprJ           | 32B | 34.94 | 84.38 | 1.93 |                              |
| pbp            | 32B |       |       |      | CurveFitFailed               |
| pbp2x          | 32B |       |       |      | NoAmplification              |
| Pbp5           | 32B |       |       |      | CurveFitFailed               |
| penA           | 32B | 40.82 | 79.5  | 1.61 | MultipleMeltPeaks            |
| pikR1          | 32B | 39.13 | 79.79 | 1.74 | MultipleMeltPeaks            |
| pikR2          | 32B | 30.32 | 84.91 | 2.03 |                              |
| pmrA           | 32B | 27.14 | 79.68 | 2.04 |                              |
| pncA           | 32B | 34.02 | 83.77 | 1.95 |                              |
| putative multi | 32B | 33.06 | 84.03 | 1.92 |                              |
| qac            | 32B |       |       |      | CurveFitFailed               |
| qacA           | 32B | 29.65 | 80.88 | 2.02 |                              |
| qacA/qacB      | 32B |       |       |      | CurveFitFailed               |
| qacEdelta1-0   | 32B |       |       |      | CurveFitFailed               |
| qacEdelta1-0   | 32B | 33.24 | 84.2  | 1.98 |                              |
| qacH-01        | 32B | 33.51 | 85.63 | 1.94 |                              |
| qacH-02        | 32B | 33.53 | 83.95 | 1.7  |                              |
| qnrA           | 32B | 37.69 | 83.85 | 1.81 | MultipleMeltPeaks            |

|              |     |       |       |      |                             |
|--------------|-----|-------|-------|------|-----------------------------|
| rarD-02      | 32B | 35.49 | 85.92 | 1.86 |                             |
| sat4         | 32B |       |       |      | LowEfficiency, CtIsSmall, C |
| sdeB         | 32B |       |       |      | LowEfficiency, CtIsSmall, S |
| spcN-01      | 32B |       |       |      | CurveFitFailed              |
| speA         | 32B |       |       |      | NoAmplification             |
| str          | 32B |       |       |      | LowEfficiency, CtIsSmall, C |
| strA         | 32B |       |       |      | LowEfficiency, CtIsSmall, S |
| strB         | 32B | 32.64 | 84.61 | 1.98 |                             |
| sul1         | 32B | 34.84 | 89.6  | 1.78 |                             |
| sul2         | 32B |       |       |      | LowEfficiency, CtIsSmall, S |
| sulA/foIP-01 | 32B | 24.88 | 80.95 | 1.96 |                             |
| sulA/foIP-03 | 32B | 27.53 | 83.19 | 1.95 |                             |
| tet(32)      | 32B |       |       |      | CurveFitFailed              |
| tet(34)      | 32B |       |       |      | CurveFitFailed              |
| tet(35)      | 32B |       |       |      | NoAmplification             |
| tet(36)-A    | 32B |       |       |      | LowEfficiency, CtIsSmall, C |
| tet(36)-B    | 32B |       |       |      | LowEfficiency, CtIsSmall, S |
| tet(37)      | 32B | 29.55 | 75.94 | 2    | MultipleMeltPeaks           |
| tetA-01      | 32B | 30.42 | 85.16 | 1.92 |                             |
| tetA-02      | 32B | 32.89 | 83.66 | 1.94 |                             |
| tetB-01      | 32B | 31.47 | 89.48 | 2.01 |                             |
| tetB-02      | 32B |       |       |      | CurveFitFailed              |
| tetC-01      | 32B |       |       |      | NoAmplification             |
| tetC-02      | 32B |       |       |      | CurveFitFailed              |
| tetD-01      | 32B |       |       |      | LowEfficiency, CtIsSmall, C |
| tetD-02      | 32B |       |       |      | CurveFitFailed              |
| tetE         | 32B |       |       |      | LowEfficiency, CtIsSmall, S |
| tetG-01      | 32B | 33.95 | 82.24 | 1.9  | MultipleMeltPeaks           |
| tetG-02      | 32B | 35.76 | 75.43 | 1.93 |                             |
| tetH         | 32B |       |       |      | LowEfficiency, CtIsSmall, C |
| tetJ         | 32B |       |       |      | LowEfficiency, CtIsSmall, C |
| tetK         | 32B |       |       |      | LowEfficiency, CtIsSmall, S |
| tetL-01      | 32B | 36.88 | 89.24 | 1.76 |                             |
| tetL-02      | 32B | 32.39 | 85.14 | 1.81 |                             |
| tetM-01      | 32B | 26.31 | 76.1  | 1.97 |                             |
| tetM-02      | 32B | 24.79 | 77.69 | 2.01 |                             |
| tetO-01      | 32B | 27.01 | 76.65 | 1.95 |                             |
| tetPA        | 32B |       |       |      | NoAmplification             |
| tetPB-01     | 32B | 37.38 | 83.25 | 2.13 | MultipleMeltPeaks           |
| tetPB-02     | 32B | 30.68 | 84.81 | 2.02 |                             |
| tetPB-03     | 32B |       |       |      | CurveFitFailed              |
| tetPB-05     | 32B |       |       |      | LowEfficiency, CtIsSmall, S |
| tetQ         | 32B | 29.28 | 77.32 | 2.03 |                             |
| tetR-02      | 32B | 31.25 | 87.44 | 1.92 | MultipleMeltPeaks           |
| tetR-03      | 32B |       |       |      | CurveFitFailed              |
| tetS         | 32B | 35.93 | 75.71 | 1.99 |                             |

|             |     |       |       |      |                              |
|-------------|-----|-------|-------|------|------------------------------|
| tetT        | 32B |       |       |      | LowEfficiency, CtIsSmall, S; |
| tetU-01     | 32B |       |       |      | CurveFitFailed               |
| tetV        | 32B |       |       |      | LowEfficiency, CtIsSmall, Ci |
| tetW-01     | 32B |       |       |      | LowEfficiency, CtIsSmall, S; |
| tetX        | 32B |       |       |      | BadR2, LowEfficiency, CtIsS  |
| tnpA-01     | 32B |       |       |      | CurveFitFailed               |
| tnpA-02     | 32B | 34.22 | 84.73 | 1.83 | MultipleMeltPeaks            |
| tnpA-03     | 32B | 37.38 | 73.94 | 1.89 | MultipleMeltPeaks            |
| tnpA-04     | 32B | 37.3  | 83.44 | 1.78 | MultipleMeltPeaks            |
| tnpA-05     | 32B |       |       |      | LowEfficiency, CtIsSmall, Ci |
| tnpA-07     | 32B |       |       |      | CurveFitFailed               |
| tolC-01     | 32B | 36.88 | 80.81 | 1.8  |                              |
| tolC-02     | 32B | 29.46 | 87.84 | 1.95 |                              |
| tolC-03     | 32B | 29.69 | 85.26 | 1.96 |                              |
| Tp614       | 32B | 32.87 | 79.98 | 1.96 |                              |
| ttgA        | 32B | 38.05 | 81.84 | 1.83 | MultipleMeltPeaks            |
| ttgB        | 32B | 32.69 | 80.81 | 1.95 |                              |
| vanA        | 32B |       |       |      | NoAmplification              |
| vanB-01     | 32B | 35.11 | 83.95 | 1.95 |                              |
| vanC-01     | 32B |       |       |      | LowEfficiency, CtIsSmall, S; |
| vanC-02     | 32B |       |       |      | LowEfficiency, CtIsSmall, Ci |
| vanC-03     | 32B | 25.8  | 86.29 | 1.95 | MultipleMeltPeaks            |
| vanC1       | 32B |       |       |      | CurveFitFailed               |
| vanC2/vanC3 | 32B | 33.04 | 85.39 | 2.07 |                              |
| vanG        | 32B |       |       |      | LowEfficiency, CtIsSmall, Ci |
| vanHB       | 32B | 32.95 | 78.69 | 1.97 | MultipleMeltPeaks            |
| vanHD       | 32B | 36.8  | 84.15 | 1.71 |                              |
| vanRA-01    | 32B |       |       |      | LowEfficiency, CtIsSmall, S; |
| vanRA-02    | 32B |       |       |      | NoAmplification              |
| vanRB       | 32B | 31.06 | 87.53 | 2.02 |                              |
| vanRC       | 32B |       |       |      | LowEfficiency, CtIsSmall, Ci |
| vanRC4      | 32B |       |       |      | CurveFitFailed               |
| vanRD       | 32B |       |       |      | LowEfficiency, CtIsSmall, S; |
| vanSA       | 32B |       |       |      | LowEfficiency, CtIsSmall, S; |
| vanSB       | 32B | 30.07 | 74.67 | 2.07 |                              |
| vanSC-01    | 32B | 38.14 | 84.08 | 1.89 |                              |
| vanSC-02    | 32B |       |       |      | NoAmplification              |
| vanTC-01    | 32B |       |       |      | LowEfficiency, CtIsSmall, Ci |
| vanTC-02    | 32B |       |       |      | CurveFitFailed               |
| vanTE       | 32B |       |       |      | LowEfficiency, CtIsSmall, Ci |
| vanTG       | 32B |       |       |      | NoAmplification              |
| vanWB       | 32B |       |       |      | LowEfficiency, CtIsSmall, Ci |
| vanWG       | 32B | 37.84 | 74.07 | 2.03 |                              |
| vanXA       | 32B |       |       |      | LowEfficiency, CtIsSmall, S; |
| vanXB       | 32B |       |       |      | NoAmplification              |
| vanXD       | 32B | 38.01 | 74.1  | 1.88 |                              |

|              |     |       |       |      |                              |
|--------------|-----|-------|-------|------|------------------------------|
| vanYB        | 32B | 37.26 | 78.66 | 1.84 | MultipleMeltPeaks            |
| vanYD-01     | 32B | 33.08 | 81.58 | 1.81 |                              |
| vanYD-02     | 32B |       |       |      | LowEfficiency, CtIsSmall, Ct |
| vatB-01      | 32B |       |       |      | CurveFitFailed               |
| vatB-02      | 32B | 38.06 | 81.52 | 1.83 | MultipleMeltPeaks            |
| vatC-01      | 32B | 32.34 | 81.93 | 1.94 |                              |
| vatC-02      | 32B |       |       |      | CurveFitFailed               |
| vatE-01      | 32B | 29.64 | 76.7  | 2.14 |                              |
| vatE-02      | 32B |       |       |      | NoAmplification              |
| vgaA-01      | 32B |       |       |      | CurveFitFailed               |
| vgaA-02      | 32B |       |       |      | CurveFitFailed               |
| vgb-01       | 32B | 37.69 | 83.69 | 1.87 |                              |
| vgbB-01      | 32B | 37.68 | 86.71 | 1.72 |                              |
| vgbB-02      | 32B |       |       |      | NoAmplification              |
| yceE/mdtG-0  | 32B | 33.47 | 82.59 | 1.98 |                              |
| yceE/mdtG-0  | 32B |       |       |      | BadR2, LowEfficiency, CtIsS  |
| yceL/mdtH-0  | 32B | 32.43 | 85.42 | 2.01 |                              |
| yceL/mdtH-0  | 32B | 28.89 | 82.91 | 1.96 |                              |
| yceL/mdtH-0  | 32B | 37.82 | 76.02 | 1.82 | MultipleMeltPeaks            |
| yidY/mdtL-01 | 32B | 31.45 | 82.47 | 1.97 | MultipleMeltPeaks            |
| yidY/mdtL-02 | 32B | 28.19 | 79.97 | 1.97 |                              |































| Assay           | Sample | Ct | Tm    | Efficiency | flag                        |
|-----------------|--------|----|-------|------------|-----------------------------|
| 16S rRNA        | 32C    |    | 17.62 | 82.12      | 2.01                        |
| aac             | 32C    |    | 32.01 | 81.23      | 1.81                        |
| aac(6')-Ib(akz) | 32C    |    |       |            | LowEfficiency, CtIsSmall, C |
| aac(6')-Ib(akz) | 32C    |    | 31.05 | 83.05      | 1.99                        |
| aac(6')-Ib(akz) | 32C    |    | 34.79 | 76.47      | 1.92                        |
| aac(6')-II      | 32C    |    | 40.35 | 81.24      | 1.41                        |
| aac(6')I1       | 32C    |    |       |            | NoAmplification             |
| aacA/aphD       | 32C    |    |       |            | CurveFitFailed              |
| aacC            | 32C    |    | 32.6  | 89.33      | 1.78                        |
| aacC1           | 32C    |    |       |            | LowEfficiency, CtIsSmall, C |
| aacC2           | 32C    |    |       |            | NoAmplification             |
| aacC4           | 32C    |    | 36.44 | 81.45      | 1.85                        |
| aadA-01         | 32C    |    |       |            | LowEfficiency, CtIsSmall, S |
| aadA-02         | 32C    |    |       |            | CurveFitFailed              |
| aadA-1-01       | 32C    |    | 36.66 | 81.59      | 1.88                        |
| aadA-1-02       | 32C    |    |       |            | CurveFitFailed              |
| aadA1           | 32C    |    |       |            | CurveFitFailed              |
| aadA2-01        | 32C    |    |       |            | CurveFitFailed              |
| aadA2-02        | 32C    |    | 32.81 | 75.29      | 2.01                        |
| aadA2-03        | 32C    |    |       |            | LowEfficiency, CtIsSmall, S |
| aadA5-01        | 32C    |    |       |            | CurveFitFailed              |
| aadA5-02        | 32C    |    | 31.71 | 82.75      | 1.98 MultipleMeltPeaks      |
| aadA9-01        | 32C    |    |       |            | CurveFitFailed              |
| aadA9-02        | 32C    |    |       |            | LowEfficiency, CtIsSmall, S |
| aadD            | 32C    |    |       |            | LowEfficiency, CtIsSmall, S |
| aadE            | 32C    |    |       |            | CurveFitFailed              |
| acrA-01         | 32C    |    | 35.15 | 88.7       | 1.89 MultipleMeltPeaks      |
| acrA-02         | 32C    |    |       |            | LowEfficiency, CtIsSmall, C |
| acrA-03         | 32C    |    |       |            | LowEfficiency, CtIsSmall, S |
| acrA-04         | 32C    |    | 30.32 | 84.29      | 1.94 MultipleMeltPeaks      |
| acrA-05         | 32C    |    | 31.1  | 91.2       | 1.96 MultipleMeltPeaks      |
| acrB-01         | 32C    |    |       |            | NoAmplification             |
| acrF            | 32C    |    | 33.75 | 82.2       | 1.94                        |
| acrR-01         | 32C    |    | 36.42 | 83.85      | 1.91                        |
| acrR-02         | 32C    |    | 37.48 | 85.57      | 1.73                        |
| Actin           | 32C    |    | 21.71 | 87.16      | 1.95 MultipleMeltPeaks      |
| adeA            | 32C    |    | 39.69 | 81.98      | 1.73 MultipleMeltPeaks      |
| ampC-01         | 32C    |    | 32.22 | 85.46      | 1.99                        |
| ampC-02         | 32C    |    |       |            | LowEfficiency, CtIsSmall, S |
| ampC-04         | 32C    |    | 32.89 | 83.56      | 1.88 MultipleMeltPeaks      |
| ampC-05         | 32C    |    |       |            | LowEfficiency, CtIsSmall, C |
| ampC-06         | 32C    |    | 29.13 | 84.55      | 1.97                        |
| ampC-07         | 32C    |    |       |            | CurveFitFailed              |
| ampC-09         | 32C    |    | 34.15 | 76.29      | 1.96                        |
| ampC/blaDH      | 32C    |    | 29.43 | 83.81      | 2.01 MultipleMeltPeaks      |

|                            |     |       |       |      |                                          |
|----------------------------|-----|-------|-------|------|------------------------------------------|
| aph                        | 32C |       |       |      | CurveFitFailed                           |
| aph(2')-Id-01              | 32C |       |       |      | LowEfficiency, CtIsSmall, S <sub>e</sub> |
| aph(2')-Id-02              | 32C |       |       |      | LowEfficiency, CtIsSmall, S <sub>e</sub> |
| aph6ia                     | 32C | 27.64 | 84.45 | 1.95 |                                          |
| aphA1(aka k <sub>a</sub> ) | 32C |       |       |      | LowEfficiency, CtIsSmall, S <sub>e</sub> |
| bacA-01                    | 32C |       |       |      | CurveFitFailed                           |
| bacA-02                    | 32C |       |       |      | LowEfficiency, CtIsSmall, S <sub>e</sub> |
| BETA-globin                | 32C | 23.12 | 84.01 | 1.98 |                                          |
| bla-ACC-1                  | 32C |       |       |      | LowEfficiency, CtIsSmall, S <sub>e</sub> |
| bla-L1                     | 32C | 30.23 | 86.13 | 1.98 | MultipleMeltPeaks                        |
| bla1                       | 32C |       |       |      | LowEfficiency, CtIsSmall, S <sub>e</sub> |
| blaCMY                     | 32C | 37.23 | 84.43 | 1.87 |                                          |
| blaCMY2-01                 | 32C |       |       |      | LowEfficiency, CtIsSmall, S <sub>e</sub> |
| blaCMY2-02                 | 32C | 30.23 | 84.97 | 2.01 |                                          |
| blaCTX-M-01                | 32C | 32.99 | 90.65 | 2    | MultipleMeltPeaks                        |
| blaCTX-M-02                | 32C | 32.8  | 78.26 | 1.98 |                                          |
| blaCTX-M-03                | 32C |       |       |      | LowEfficiency, CtIsSmall, S <sub>e</sub> |
| blaCTX-M-04                | 32C | 35.11 | 84.27 | 1.93 | MultipleMeltPeaks                        |
| blaCTX-M-05                | 32C |       |       |      | NoAmplification                          |
| blaCTX-M-06                | 32C |       |       |      | NoAmplification                          |
| blaGES                     | 32C |       |       |      | LowEfficiency, CtIsSmall, S <sub>e</sub> |
| blaIMP-01                  | 32C |       |       |      | CurveFitFailed                           |
| blaIMP-02                  | 32C |       |       |      | LowEfficiency, CtIsSmall, S <sub>e</sub> |
| blaMOX/blaC                | 32C |       |       |      | NoAmplification                          |
| blaOCH                     | 32C |       |       |      | NoAmplification                          |
| blaOKP                     | 32C |       |       |      | NoAmplification                          |
| blaOXA1/blaC               | 32C |       |       |      | LowEfficiency, CtIsSmall, S <sub>e</sub> |
| blaOXA10-01                | 32C | 37.67 | 78.79 | 1.86 |                                          |
| blaOXA10-02                | 32C |       |       |      | CurveFitFailed                           |
| blaOXY                     | 32C | 37.95 | 89.05 | 1.67 |                                          |
| blaPAO                     | 32C |       |       |      | NoAmplification                          |
| blaPER                     | 32C |       |       |      | CurveFitFailed                           |
| blaPSE                     | 32C |       |       |      | NoAmplification                          |
| blaROB                     | 32C |       |       |      | NoAmplification                          |
| blaSFO                     | 32C | 33.08 | 80.01 | 1.88 | MultipleMeltPeaks                        |
| blaSHV-01                  | 32C |       |       |      | CurveFitFailed                           |
| blaSHV-02                  | 32C |       |       |      | CurveFitFailed                           |
| blaTEM                     | 32C | 28.57 | 79.51 | 2    |                                          |
| blaTLA                     | 32C |       |       |      | LowEfficiency, CtIsSmall, S <sub>e</sub> |
| blaVEB                     | 32C |       |       |      | CurveFitFailed                           |
| blaVIM                     | 32C |       |       |      | NoAmplification                          |
| blaZ                       | 32C |       |       |      | CurveFitFailed                           |
| carB                       | 32C | 39.09 | 82.41 | 1.82 |                                          |
| catA1                      | 32C |       |       |      | NoAmplification                          |
| catB3                      | 32C |       |       |      | CurveFitFailed                           |
| catB8                      | 32C | 30.32 | 82.47 | 1.99 |                                          |

|            |     |       |       |      |                              |
|------------|-----|-------|-------|------|------------------------------|
| ceoA       | 32C | 29.52 | 83.19 | 1.95 | MultipleMeltPeaks            |
| cepA       | 32C |       |       |      | LowEfficiency, CtIsSmall, S: |
| cfiA       | 32C | 32.93 | 77.53 | 1.91 |                              |
| cfr        | 32C |       |       |      | LowEfficiency, CtIsSmall, S: |
| cfxA       | 32C | 21.63 | 77.6  | 2.06 |                              |
| cmeA       | 32C |       |       |      | CurveFitFailed               |
| cmlA1-01   | 32C |       |       |      | CurveFitFailed               |
| cmlA1-02   | 32C | 36.21 | 73.82 | 1.9  |                              |
| cmr        | 32C |       |       |      | LowEfficiency, CtIsSmall, C: |
| cmx(A)     | 32C | 28.29 | 84.49 | 2    | MultipleMeltPeaks            |
| cphA-01    | 32C | 39.66 | 82.09 | 1.73 |                              |
| cphA-02    | 32C | 33.26 | 82.37 | 2    |                              |
| dfrA1      | 32C | 37.43 | 78.71 | 1.9  |                              |
| dfrA12     | 32C |       |       |      | LowEfficiency, CtIsSmall, S: |
| emrD       | 32C |       |       |      | CurveFitFailed               |
| ereA       | 32C | 35.52 | 83.19 | 1.91 |                              |
| ereB       | 32C |       |       |      | CurveFitFailed               |
| erm(34)    | 32C |       |       |      | NoAmplification              |
| erm(35)    | 32C |       |       |      | LowEfficiency, CtIsSmall, S: |
| erm(36)    | 32C | 30.66 | 86    | 2.1  |                              |
| ermA       | 32C |       |       |      | LowEfficiency, CtIsSmall, S: |
| ermA/ermTR | 32C |       |       |      | NoAmplification              |
| ermB       | 32C | 20.79 | 75.1  | 2.13 |                              |
| ermC       | 32C |       |       |      | CurveFitFailed               |
| ermF       | 32C | 22.85 | 74.72 | 2.03 |                              |
| ermJ/ermD  | 32C |       |       |      | LowEfficiency, CtIsSmall, S: |
| ermK-01    | 32C |       |       |      | CurveFitFailed               |
| ermK-02    | 32C | 37.15 | 85.42 | 1.85 |                              |
| ermT-01    | 32C |       |       |      | LowEfficiency, CtIsSmall, S: |
| ermT-02    | 32C | 31.63 | 76.3  | 2.05 |                              |
| ermX       | 32C |       |       |      | CurveFitFailed               |
| ermY       | 32C |       |       |      | LowEfficiency, CtIsSmall, S: |
| fabK       | 32C | 23.87 | 78.85 | 2.12 |                              |
| floR       | 32C | 38.18 | 87.04 | 1.68 |                              |
| folA       | 32C |       |       |      | NoAmplification              |
| fosB       | 32C |       |       |      | LowEfficiency, CtIsSmall, S: |
| fosX       | 32C |       |       |      | LowEfficiency, CtIsSmall, S: |
| fox5       | 32C | 28.88 | 86.22 | 1.99 |                              |
| imiR       | 32C |       |       |      | CurveFitFailed               |
| ImrA-01    | 32C | 37.96 | 83.53 | 1.94 | MultipleMeltPeaks            |
| intl       | 32C | 30.46 | 84.86 | 1.95 |                              |
| intl1      | 32C | 21.06 | 87.03 | 2.05 | MultipleMeltPeaks            |
| IS613      | 32C | 21.5  | 79.74 | 2.08 |                              |
| lnuA-01    | 32C |       |       |      | LowEfficiency, CtIsSmall, S: |
| lnuB-01    | 32C |       |       |      | LowEfficiency, CtIsSmall, S: |
| lnuB-02    | 32C |       |       |      | LowEfficiency, CtIsSmall, S: |

|                |     |       |       |      |                             |
|----------------|-----|-------|-------|------|-----------------------------|
| lnuC           | 32C |       |       |      | CurveFitFailed              |
| marR-01        | 32C |       |       |      | CurveFitFailed              |
| matA/mel       | 32C | 21.08 | 77.55 | 2.05 |                             |
| mdet1          | 32C |       |       |      | BadR2, LowEfficiency, CtIsS |
| mdtA           | 32C |       |       |      | CurveFitFailed              |
| mdtE/yhiU      | 32C |       |       |      | CurveFitFailed              |
| mecA           | 32C |       |       |      | LowEfficiency, CtIsSmall, S |
| mefA           | 32C | 20.23 | 80.66 | 1.98 |                             |
| mepA           | 32C | 33    | 80.09 | 2.01 | MultipleMeltPeaks           |
| mexA           | 32C |       |       |      | CurveFitFailed              |
| mexD           | 32C | 34.04 | 80    | 2.04 |                             |
| mexE           | 32C |       |       |      | CurveFitFailed              |
| mexF           | 32C | 31.63 | 81.06 | 2    | MultipleMeltPeaks           |
| mphA-01        | 32C | 31.53 | 89.21 | 1.95 |                             |
| mphA-02        | 32C | 31.59 | 87.52 | 1.98 |                             |
| mphB           | 32C |       |       |      | CurveFitFailed              |
| mphC           | 32C |       |       |      | LowEfficiency, CtIsSmall, S |
| msrA-01        | 32C |       |       |      | LowEfficiency, CtIsSmall, S |
| msrC-01        | 32C |       |       |      | NoAmplification             |
| mtrC-01        | 32C |       |       |      | LowEfficiency, CtIsSmall, S |
| mtrC-02        | 32C | 35.97 | 84.37 | 1.88 |                             |
| mtrD-02        | 32C | 28.07 | 81.85 | 2.02 | MultipleMeltPeaks           |
| mtrD-03        | 32C | 31.61 | 82.04 | 1.91 |                             |
| NDM1           | 32C |       |       |      | LowEfficiency, CtIsSmall, S |
| nimE           | 32C |       |       |      | CurveFitFailed              |
| nisB           | 32C |       |       |      | CurveFitFailed              |
| oleC           | 32C | 36.26 | 83.96 | 1.84 |                             |
| oprD           | 32C | 28.84 | 89.59 | 1.98 | MultipleMeltPeaks           |
| oprJ           | 32C | 32.67 | 91.04 | 1.94 |                             |
| pbp            | 32C |       |       |      | LowEfficiency, CtIsSmall, S |
| pbp2x          | 32C |       |       |      | LowEfficiency, CtIsSmall, S |
| Pbp5           | 32C |       |       |      | LowEfficiency, CtIsSmall, S |
| penA           | 32C | 37.16 | 84.32 | 1.69 |                             |
| pikR1          | 32C |       |       |      | LowEfficiency, CtIsSmall, S |
| pikR2          | 32C | 31.94 | 84.72 | 1.72 |                             |
| pmrA           | 32C | 22.4  | 79.71 | 2.09 |                             |
| pncA           | 32C | 28.82 | 89.37 | 1.93 |                             |
| putative multi | 32C |       |       |      | CurveFitFailed              |
| qac            | 32C | 30.97 | 78.38 | 2    |                             |
| qacA           | 32C |       |       |      | LowEfficiency, CtIsSmall, S |
| qacA/qacB      | 32C |       |       |      | LowEfficiency, CtIsSmall, S |
| qacEdelta1-0   | 32C |       |       |      | CurveFitFailed              |
| qacEdelta1-0   | 32C | 36.45 | 81.61 | 1.86 |                             |
| qacH-01        | 32C | 37.34 | 86.27 | 1.86 | MultipleMeltPeaks           |
| qacH-02        | 32C | 35.09 | 78.8  | 1.88 | MultipleMeltPeaks           |
| qnrA           | 32C |       |       |      | CurveFitFailed              |



|              |     |       |       |      |                              |
|--------------|-----|-------|-------|------|------------------------------|
| rarD-02      | 32C | 37.47 | 83.3  | 1.88 |                              |
| sat4         | 32C |       |       |      | CurveFitFailed               |
| sdeB         | 32C |       |       |      | CurveFitFailed               |
| spcN-01      | 32C |       |       |      | CurveFitFailed               |
| speA         | 32C |       |       |      | NoAmplification              |
| str          | 32C |       |       |      | CurveFitFailed               |
| strA         | 32C |       |       |      | LowEfficiency, CtIsSmall, S: |
| strB         | 32C |       |       |      | LowEfficiency, CtIsSmall, C: |
| sul1         | 32C |       |       |      | NoAmplification              |
| sul2         | 32C |       |       |      | LowEfficiency, CtIsSmall, S: |
| sulA/foIP-01 | 32C | 21.14 | 80.9  | 1.99 |                              |
| sulA/foIP-03 | 32C | 22.1  | 83.3  | 1.98 |                              |
| tet(32)      | 32C | 24.58 | 81.41 | 1.99 |                              |
| tet(34)      | 32C | 33.38 | 75.33 | 2.02 |                              |
| tet(35)      | 32C | 35.69 | 76.15 | 2.01 |                              |
| tet(36)-A    | 32C |       |       |      | LowEfficiency, CtIsSmall, S: |
| tet(36)-B    | 32C |       |       |      | LowEfficiency, CtIsSmall, S: |
| tet(37)      | 32C | 24.82 | 76.22 | 2    | MultipleMeltPeaks            |
| tetA-01      | 32C | 35.58 | 85.1  | 1.87 |                              |
| tetA-02      | 32C |       |       |      | CurveFitFailed               |
| tetB-01      | 32C | 24.14 | 79.86 | 2    |                              |
| tetB-02      | 32C | 23.57 | 79.74 | 2.01 |                              |
| tetC-01      | 32C | 24.15 | 75.41 | 2.03 |                              |
| tetC-02      | 32C | 23.55 | 76.19 | 2.07 |                              |
| tetD-01      | 32C |       |       |      | LowEfficiency, CtIsSmall, S: |
| tetD-02      | 32C | 38.82 | 64.48 | 1.67 | MultipleMeltPeaks            |
| tetE         | 32C |       |       |      | CurveFitFailed               |
| tetG-01      | 32C | 35.38 | 89.89 | 1.82 | MultipleMeltPeaks            |
| tetG-02      | 32C | 38.85 | 83.58 | 1.77 | MultipleMeltPeaks            |
| tetH         | 32C |       |       |      | CurveFitFailed               |
| tetJ         | 32C |       |       |      | LowEfficiency, CtIsSmall, S: |
| tetK         | 32C |       |       |      | CurveFitFailed               |
| tetL-01      | 32C |       |       |      | LowEfficiency, CtIsSmall, S: |
| tetL-02      | 32C | 34.92 | 85.29 | 1.75 |                              |
| tetM-01      | 32C | 20.33 | 76.37 | 1.99 |                              |
| tetM-02      | 32C | 20.55 | 77.72 | 2.05 |                              |
| tetO-01      | 32C | 22.36 | 76.92 | 2.07 |                              |
| tetPA        | 32C |       |       |      | CurveFitFailed               |
| tetPB-01     | 32C |       |       |      | NoAmplification              |
| tetPB-02     | 32C | 31.1  | 84.78 | 2.06 |                              |
| tetPB-03     | 32C |       |       |      | LowEfficiency, CtIsSmall, S: |
| tetPB-05     | 32C |       |       |      | LowEfficiency, CtIsSmall, S: |
| tetQ         | 32C | 22.74 | 77.16 | 2.05 |                              |
| tetR-02      | 32C | 36.22 | 85.16 | 1.86 | MultipleMeltPeaks            |
| tetR-03      | 32C | 23.66 | 76.29 | 2.01 |                              |
| tetS         | 32C |       |       |      | CurveFitFailed               |

|             |     |       |       |      |                              |
|-------------|-----|-------|-------|------|------------------------------|
| tetT        | 32C |       |       |      | LowEfficiency, CtIsSmall, S: |
| tetU-01     | 32C |       |       |      | LowEfficiency, CtIsSmall, S: |
| tetV        | 32C |       |       |      | LowEfficiency, CtIsSmall, S: |
| tetW-01     | 32C | 22.54 | 81.98 | 2.01 |                              |
| tetX        | 32C |       |       |      | CurveFitFailed               |
| tnpA-01     | 32C |       |       |      | CurveFitFailed               |
| tnpA-02     | 32C | 38.13 | 80.72 | 1.8  |                              |
| tnpA-03     | 32C | 37.95 | 80.03 | 1.87 | MultipleMeltPeaks            |
| tnpA-04     | 32C |       |       |      | LowEfficiency, CtIsSmall, Ci |
| tnpA-05     | 32C | 37.97 | 76.28 | 1.88 |                              |
| tnpA-07     | 32C |       |       |      | CurveFitFailed               |
| tolC-01     | 32C |       |       |      | LowEfficiency, CtIsSmall, S: |
| tolC-02     | 32C | 31.82 | 85    | 1.94 |                              |
| tolC-03     | 32C | 32.34 | 87.5  | 1.91 |                              |
| Tp614       | 32C | 35.08 | 82.78 | 1.88 | MultipleMeltPeaks            |
| ttgA        | 32C |       |       |      | LowEfficiency, CtIsSmall, S: |
| ttgB        | 32C |       |       |      | CurveFitFailed               |
| vanA        | 32C |       |       |      | LowEfficiency, CtIsSmall, Ci |
| vanB-01     | 32C | 33.38 | 81.52 | 1.96 |                              |
| vanC-01     | 32C |       |       |      | LowEfficiency, CtIsSmall, S: |
| vanC-02     | 32C | 38.63 | 76.53 | 1.84 |                              |
| vanC-03     | 32C | 28.5  | 85.41 | 1.95 | MultipleMeltPeaks            |
| vanC1       | 32C |       |       |      | LowEfficiency, CtIsSmall, S: |
| vanC2/vanC3 | 32C | 33.2  | 82.8  | 2.06 |                              |
| vanG        | 32C |       |       |      | CurveFitFailed               |
| vanHB       | 32C | 33.84 | 83.05 | 1.93 |                              |
| vanHD       | 32C |       |       |      | CurveFitFailed               |
| vanRA-01    | 32C |       |       |      | LowEfficiency, CtIsSmall, S: |
| vanRA-02    | 32C |       |       |      | LowEfficiency, CtIsSmall, S: |
| vanRB       | 32C |       |       |      | CurveFitFailed               |
| vanRC       | 32C |       |       |      | LowEfficiency, CtIsSmall, S: |
| vanRC4      | 32C |       |       |      | CurveFitFailed               |
| vanRD       | 32C |       |       |      | CurveFitFailed               |
| vanSA       | 32C |       |       |      | CurveFitFailed               |
| vanSB       | 32C | 30.96 | 74.4  | 2.04 |                              |
| vanSC-01    | 32C |       |       |      | CurveFitFailed               |
| vanSC-02    | 32C |       |       |      | NoAmplification              |
| vanTC-01    | 32C |       |       |      | LowEfficiency, CtIsSmall, S: |
| vanTC-02    | 32C |       |       |      | NoAmplification              |
| vanTE       | 32C |       |       |      | LowEfficiency, CtIsSmall, Ci |
| vanTG       | 32C | 32.12 | 74.67 | 2    |                              |
| vanWB       | 32C |       |       |      | LowEfficiency, CtIsSmall, Ci |
| vanWG       | 32C | 36.11 | 74.28 | 1.95 |                              |
| vanXA       | 32C |       |       |      | CurveFitFailed               |
| vanXB       | 32C |       |       |      | NoAmplification              |
| vanXD       | 32C | 32.12 | 75.3  | 2.01 |                              |

|              |     |       |       |      |                              |
|--------------|-----|-------|-------|------|------------------------------|
| vanYB        | 32C |       |       |      | LowEfficiency, CtIsSmall, S: |
| vanYD-01     | 32C | 33.14 | 81.63 | 1.82 |                              |
| vanYD-02     | 32C |       |       |      | LowEfficiency, CtIsSmall, S: |
| vatB-01      | 32C |       |       |      | LowEfficiency, CtIsSmall, S: |
| vatB-02      | 32C |       |       |      | CurveFitFailed               |
| vatC-01      | 32C |       |       |      | LowEfficiency, CtIsSmall, Ci |
| vatC-02      | 32C |       |       |      | CurveFitFailed               |
| vatE-01      | 32C | 31.48 | 76.89 | 2.08 |                              |
| vatE-02      | 32C | 36.13 | 75.84 | 2.06 |                              |
| vgaA-01      | 32C |       |       |      | LowEfficiency, CtIsSmall, S: |
| vgaA-02      | 32C |       |       |      | CurveFitFailed               |
| vgb-01       | 32C |       |       |      | LowEfficiency, CtIsSmall, S: |
| vgbB-01      | 32C |       |       |      | CurveFitFailed               |
| vgbB-02      | 32C |       |       |      | LowEfficiency, CtIsSmall, S: |
| yceE/mdtG-0  | 32C | 34.61 | 81.22 | 1.97 |                              |
| yceE/mdtG-0  | 32C | 38.21 | 81.17 | 1.86 |                              |
| yceL/mdtH-0  | 32C | 31.23 | 87.22 | 1.97 | MultipleMeltPeaks            |
| yceL/mdtH-0  | 32C |       |       |      | LowEfficiency, CtIsSmall, S: |
| yceL/mdtH-0  | 32C | 38.18 | 77.81 | 1.87 | MultipleMeltPeaks            |
| yidY/mdtL-01 | 32C | 33.01 | 82.66 | 1.96 |                              |
| yidY/mdtL-02 | 32C |       |       |      | LowEfficiency, CtIsSmall, S: |































| Assay          | Sample | Ct | Tm    | Efficiency | flag                         |
|----------------|--------|----|-------|------------|------------------------------|
| 16S rRNA       | 33A    |    | 17.59 | 82.04      | 2.04                         |
| aac            | 33A    |    | 30.9  | 84.27      | 1.63 MultipleMeltPeaks       |
| aac(6')-Ib(akz | 33A    |    | 36.05 | 82.85      | 1.98                         |
| aac(6')-Ib(akz | 33A    |    | 30.45 | 87.02      | 2.05 MultipleMeltPeaks       |
| aac(6')-Ib(akz | 33A    |    | 32.48 | 80.86      | 1.97 MultipleMeltPeaks       |
| aac(6')-II     | 33A    |    | 31.02 | 84.82      | 1.7                          |
| aac(6')I1      | 33A    |    | 32.33 | 87.23      | 1.96                         |
| aacA/aphD      | 33A    |    |       |            | LowEfficiency, CtIsSmall, Ci |
| aacC           | 33A    |    | 31.44 | 92.01      | 1.99                         |
| aacC1          | 33A    |    |       |            | LowEfficiency, CtIsSmall, Ci |
| aacC2          | 33A    |    |       |            | NoAmplification              |
| aacC4          | 33A    |    | 32.01 | 83.59      | 1.87                         |
| aadA-01        | 33A    |    |       |            | LowEfficiency, CtIsSmall, Ci |
| aadA-02        | 33A    |    | 32    | 87         | 1.88                         |
| aadA-1-01      | 33A    |    | 32.03 | 81.3       | 1.92                         |
| aadA-1-02      | 33A    |    |       |            | LowEfficiency, CtIsSmall, Ci |
| aadA1          | 33A    |    | 32.49 | 84.32      | 2.35                         |
| aadA2-01       | 33A    |    | 36.28 | 84.75      | 1.83 MultipleMeltPeaks       |
| aadA2-02       | 33A    |    | 30.15 | 75.27      | 2.05                         |
| aadA2-03       | 33A    |    |       |            | LowEfficiency, CtIsSmall, Ci |
| aadA5-01       | 33A    |    | 33.21 | 88.5       | 1.92                         |
| aadA5-02       | 33A    |    | 29.61 | 88.08      | 2.05                         |
| aadA9-01       | 33A    |    | 34.25 | 84.36      | 1.9 MultipleMeltPeaks        |
| aadA9-02       | 33A    |    | 35.52 | 80.79      | 2                            |
| aadD           | 33A    |    |       |            | NoAmplification              |
| aadE           | 33A    |    |       |            | LowEfficiency, CtIsSmall, Ci |
| acrA-01        | 33A    |    | 29.76 | 88.6       | 2.01                         |
| acrA-02        | 33A    |    | 35.97 | 86.18      | 1.9                          |
| acrA-03        | 33A    |    |       |            | LowEfficiency, CtIsSmall, Ci |
| acrA-04        | 33A    |    | 31.05 | 80.33      | 1.95 MultipleMeltPeaks       |
| acrA-05        | 33A    |    | 30.13 | 88.44      | 1.95                         |
| acrB-01        | 33A    |    |       |            | NoAmplification              |
| acrF           | 33A    |    | 30.93 | 81.94      | 1.91 MultipleMeltPeaks       |
| acrR-01        | 33A    |    | 33.49 | 90.67      | 1.91                         |
| acrR-02        | 33A    |    | 35.79 | 85.43      | 1.79                         |
| Actin          | 33A    |    | 19.14 | 86.89      | 2.03                         |
| adeA           | 33A    |    | 36.53 | 81.96      | 1.89 MultipleMeltPeaks       |
| ampC-01        | 33A    |    | 31.86 | 85.48      | 1.84                         |
| ampC-02        | 33A    |    |       |            | CurveFitFailed               |
| ampC-04        | 33A    |    | 30.83 | 78.59      | 1.68 MultipleMeltPeaks       |
| ampC-05        | 33A    |    |       |            | LowEfficiency, CtIsSmall, Ci |
| ampC-06        | 33A    |    | 36.48 | 84.22      | 1.96                         |
| ampC-07        | 33A    |    | 33.07 | 88.57      | 1.93                         |
| ampC-09        | 33A    |    |       |            | LowEfficiency, CtIsSmall, Ci |
| ampC/blaDH     | 33A    |    | 29.33 | 86.07      | 2.02                         |

|                            |     |       |       |      |                                          |
|----------------------------|-----|-------|-------|------|------------------------------------------|
| aph                        | 33A |       |       |      | CurveFitFailed                           |
| aph(2')-Id-01              | 33A |       |       |      | LowEfficiency, CtIsSmall, Ci             |
| aph(2')-Id-02              | 33A |       |       |      | LowEfficiency, CtIsSmall, Ci             |
| aph6ia                     | 33A |       |       |      | BadR2, LowEfficiency, CtIsS              |
| aphA1(aka k <sub>z</sub> ) | 33A |       |       |      | LowEfficiency, CtIsSmall, Ci             |
| bacA-01                    | 33A | 34.98 | 84.44 | 1.91 |                                          |
| bacA-02                    | 33A | 32.38 | 88.05 | 1.85 |                                          |
| BETA-globin                | 33A | 20.41 | 84    | 2    |                                          |
| bla-ACC-1                  | 33A | 30.76 | 86.56 | 2.01 |                                          |
| bla-L1                     | 33A | 28.65 | 85.74 | 2.06 |                                          |
| bla1                       | 33A |       |       |      | LowEfficiency, CtIsSmall, Ci             |
| blaCMY                     | 33A |       |       |      | CurveFitFailed                           |
| blaCMY2-01                 | 33A | 34.96 | 85.24 | 1.93 | MultipleMeltPeaks                        |
| blaCMY2-02                 | 33A | 27.48 | 88.82 | 2.07 |                                          |
| blaCTX-M-01                | 33A | 29.84 | 88.73 | 2.15 |                                          |
| blaCTX-M-02                | 33A | 33.75 | 79.86 | 1.93 | MultipleMeltPeaks                        |
| blaCTX-M-03                | 33A |       |       |      | LowEfficiency, CtIsSmall, Ci             |
| blaCTX-M-04                | 33A | 34.29 | 88.72 | 2.01 | MultipleMeltPeaks                        |
| blaCTX-M-05                | 33A | 31.21 | 76.05 | 1.79 |                                          |
| blaCTX-M-06                | 33A | 31.22 | 83.2  | 1.89 |                                          |
| blaGES                     | 33A |       |       |      | NoAmplification                          |
| blaIMP-01                  | 33A |       |       |      | NoAmplification                          |
| blaIMP-02                  | 33A |       |       |      | LowEfficiency, CtIsSmall, S <sub>c</sub> |
| blaMOX/blaC                | 33A | 35.71 | 81.15 | 1.92 |                                          |
| blaOCH                     | 33A |       |       |      | NoAmplification                          |
| blaOKP                     | 33A |       |       |      | NoAmplification                          |
| blaOXA1/blaC               | 33A |       |       |      | LowEfficiency, CtIsSmall, Ci             |
| blaOXA10-01                | 33A |       |       |      | CurveFitFailed                           |
| blaOXA10-02                | 33A |       |       |      | LowEfficiency, CtIsSmall, Ci             |
| blaOXY                     | 33A | 32.63 | 88.22 | 1.91 |                                          |
| blaPAO                     | 33A |       |       |      | LowEfficiency, CtIsSmall, Ci             |
| blaPER                     | 33A |       |       |      | LowEfficiency, CtIsSmall, Ci             |
| blaPSE                     | 33A |       |       |      | NoAmplification                          |
| blaROB                     | 33A |       |       |      | NoAmplification                          |
| blaSFO                     | 33A | 29.65 | 89.62 | 1.98 |                                          |
| blaSHV-01                  | 33A | 30.92 | 88.9  | 1.39 |                                          |
| blaSHV-02                  | 33A |       |       |      | CurveFitFailed                           |
| blaTEM                     | 33A | 34.85 | 88.37 | 1.91 |                                          |
| blaTLA                     | 33A |       |       |      | LowEfficiency, CtIsSmall, Ci             |
| blaVEB                     | 33A |       |       |      | LowEfficiency, CtIsSmall, Ci             |
| blaVIM                     | 33A |       |       |      | CurveFitFailed                           |
| blaZ                       | 33A |       |       |      | CurveFitFailed                           |
| carB                       | 33A | 34.17 | 82.13 | 1.98 |                                          |
| catA1                      | 33A |       |       |      | NoAmplification                          |
| catB3                      | 33A | 31.99 | 87.54 | 1.96 |                                          |
| catB8                      | 33A | 27.9  | 84.63 | 1.98 |                                          |

|            |     |       |       |      |                              |
|------------|-----|-------|-------|------|------------------------------|
| ceoA       | 33A | 27    | 87.74 | 1.97 | MultipleMeltPeaks            |
| cepA       | 33A |       |       |      | LowEfficiency, CtIsSmall, Ci |
| cfiA       | 33A | 30.97 | 86.4  | 1.99 |                              |
| cfr        | 33A |       |       |      | LowEfficiency, CtIsSmall, Ci |
| cfxA       | 33A |       |       |      | NoAmplification              |
| cmeA       | 33A | 36.74 | 84.98 | 1.84 | MultipleMeltPeaks            |
| cmlA1-01   | 33A | 36.19 | 89.07 | 1.94 |                              |
| cmlA1-02   | 33A |       |       |      | CurveFitFailed               |
| cmr        | 33A |       |       |      | LowEfficiency, CtIsSmall, Ci |
| cmx(A)     | 33A | 26.28 | 86.28 | 2.03 | MultipleMeltPeaks            |
| cphA-01    | 33A | 30.76 | 85.64 | 1.96 |                              |
| cphA-02    | 33A | 32.24 | 82.32 | 1.97 |                              |
| dfrA1      | 33A | 35.52 | 82.78 | 1.96 | MultipleMeltPeaks            |
| dfrA12     | 33A | 34.24 | 84.07 | 1.92 | MultipleMeltPeaks            |
| emrD       | 33A | 32.91 | 82.52 | 1.97 | MultipleMeltPeaks            |
| ereA       | 33A | 32.86 | 83.01 | 1.96 |                              |
| ereB       | 33A | 32.25 | 89.15 | 2.15 |                              |
| erm(34)    | 33A |       |       |      | NoAmplification              |
| erm(35)    | 33A |       |       |      | LowEfficiency, CtIsSmall, Ci |
| erm(36)    | 33A | 35.11 | 87.98 | 1.88 |                              |
| ermA       | 33A |       |       |      | LowEfficiency, CtIsSmall, Ci |
| ermA/ermTR | 33A | 32.6  | 82.01 | 1.96 |                              |
| ermB       | 33A | 24.74 | 74.84 | 2.15 |                              |
| ermC       | 33A |       |       |      | CurveFitFailed               |
| ermF       | 33A |       |       |      | LowEfficiency, CtIsSmall, Ci |
| ermJ/ermD  | 33A |       |       |      | NoAmplification              |
| ermK-01    | 33A | 37.16 | 81.18 | 1.99 | MultipleMeltPeaks            |
| ermK-02    | 33A | 34.53 | 85.46 | 1.82 |                              |
| ermT-01    | 33A |       |       |      | LowEfficiency, CtIsSmall, S: |
| ermT-02    | 33A |       |       |      | LowEfficiency, CtIsSmall, Ci |
| ermX       | 33A | 32.84 | 86.91 | 1.88 |                              |
| ermY       | 33A |       |       |      | NoAmplification              |
| fabK       | 33A | 18.58 | 77.48 | 2.27 |                              |
| floR       | 33A |       |       |      | NoAmplification              |
| folA       | 33A |       |       |      | NoAmplification              |
| fosB       | 33A |       |       |      | LowEfficiency, CtIsSmall, S: |
| fosX       | 33A |       |       |      | CurveFitFailed               |
| fox5       | 33A | 26.1  | 87.21 | 2.03 | MultipleMeltPeaks            |
| imiR       | 33A |       |       |      | LowEfficiency, CtIsSmall, Ci |
| ImrA-01    | 33A | 36.86 | 82.45 | 1.93 | MultipleMeltPeaks            |
| intl       | 33A | 28.14 | 84.7  | 1.99 |                              |
| intl1      | 33A | 18.93 | 87.46 | 2.15 |                              |
| IS613      | 33A | 36.27 | 84.3  | 1.94 |                              |
| lnuA-01    | 33A |       |       |      | LowEfficiency, CtIsSmall, Ci |
| lnuB-01    | 33A |       |       |      | LowEfficiency, CtIsSmall, Ci |
| lnuB-02    | 33A |       |       |      | LowEfficiency, CtIsSmall, Ci |

|              |     |       |       |      |                              |
|--------------|-----|-------|-------|------|------------------------------|
| lnuC         | 33A | 31.62 | 87.46 | 1.92 |                              |
| marR-01      | 33A | 32.07 | 85.14 | 1.92 |                              |
| matA/mel     | 33A | 29.59 | 82.07 | 2.06 |                              |
| mdet1        | 33A |       |       |      | LowEfficiency, CtIsSmall, Ci |
| mdtA         | 33A |       |       |      | CurveFitFailed               |
| mdtE/yhiU    | 33A | 33.93 | 86.81 | 1.91 |                              |
| mecA         | 33A |       |       |      | NoAmplification              |
| mefA         | 33A | 31.13 | 80.12 | 1.99 | MultipleMeltPeaks            |
| mepA         | 33A | 30.04 | 87.11 | 2.01 |                              |
| mexA         | 33A |       |       |      | NoAmplification              |
| mexD         | 33A | 32.34 | 80.28 | 1.95 |                              |
| mexE         | 33A | 36.03 | 83.43 | 1.88 |                              |
| mexF         | 33A | 27.78 | 87.43 | 2.25 |                              |
| mphA-01      | 33A | 29.74 | 86.87 | 1.95 |                              |
| mphA-02      | 33A | 28.38 | 86.9  | 2.11 |                              |
| mphB         | 33A | 34.37 | 81.01 | 2    |                              |
| mphC         | 33A |       |       |      | LowEfficiency, CtIsSmall, Ci |
| msrA-01      | 33A |       |       |      | LowEfficiency, CtIsSmall, Ci |
| msrC-01      | 33A |       |       |      | NoAmplification              |
| mtrC-01      | 33A |       |       |      | BadR2, LowEfficiency, CtIsS  |
| mtrC-02      | 33A | 31.04 | 84.31 | 1.95 |                              |
| mtrD-02      | 33A | 25.43 | 85.18 | 2    |                              |
| mtrD-03      | 33A | 34.81 | 85.59 | 1.88 | MultipleMeltPeaks            |
| NDM1         | 33A | 34.42 | 79.04 | 1.97 |                              |
| nimE         | 33A | 34.74 | 82.89 | 1.96 |                              |
| nisB         | 33A |       |       |      | LowEfficiency, CtIsSmall, Ci |
| oleC         | 33A |       |       |      | CurveFitFailed               |
| oprD         | 33A | 26.49 | 86.69 | 2.04 | MultipleMeltPeaks            |
| oprJ         | 33A | 30.39 | 88.48 | 1.88 |                              |
| pbp          | 33A | 35.87 | 79.8  | 1.88 |                              |
| pbp2x        | 33A | 18.72 | 75.72 | 2.08 |                              |
| Pbp5         | 33A |       |       |      | NoAmplification              |
| penA         | 33A | 30.21 | 91.11 | 1.87 |                              |
| pikR1        | 33A |       |       |      | LowEfficiency, CtIsSmall, Ci |
| pikR2        | 33A | 28.44 | 84.74 | 2.14 |                              |
| pmrA         | 33A | 32.43 | 79.23 | 2.01 |                              |
| pncA         | 33A | 30.79 | 84.5  | 1.89 | MultipleMeltPeaks            |
| putative mul | 33A | 33.81 | 83.93 | 1.98 |                              |
| qac          | 33A |       |       |      | CurveFitFailed               |
| qacA         | 33A |       |       |      | NoAmplification              |
| qacA/qacB    | 33A |       |       |      | BadR2, LowEfficiency, CtIsS  |
| qacEdelta1-0 | 33A |       |       |      | LowEfficiency, CtIsSmall, Ci |
| qacEdelta1-0 | 33A | 29.94 | 78.36 | 1.98 |                              |
| qacH-01      | 33A | 31.43 | 86.71 | 2    | MultipleMeltPeaks            |
| qacH-02      | 33A | 31.84 | 84.02 | 1.75 |                              |
| qnrA         | 33A | 33.96 | 80.75 | 2.04 | MultipleMeltPeaks            |

|              |     |       |       |      |                              |
|--------------|-----|-------|-------|------|------------------------------|
| rarD-02      | 33A | 33.46 | 85.83 | 2.02 |                              |
| sat4         | 33A |       |       |      | LowEfficiency, CtIsSmall, Ci |
| sdeB         | 33A | 30.28 | 79.41 | 1.96 |                              |
| spcN-01      | 33A | 32.2  | 83.93 | 1.93 | MultipleMeltPeaks            |
| speA         | 33A |       |       |      | NoAmplification              |
| str          | 33A |       |       |      | NoAmplification              |
| strA         | 33A |       |       |      | BadR2, LowEfficiency, CtIsS  |
| strB         | 33A | 30.6  | 83.67 | 1.92 |                              |
| sul1         | 33A | 32.74 | 89.58 | 1.92 |                              |
| sul2         | 33A |       |       |      | LowEfficiency, CtIsSmall, Ci |
| sulA/foIP-01 | 33A | 17.75 | 81.62 | 2.07 |                              |
| sulA/foIP-03 | 33A | 18.61 | 83.84 | 1.99 |                              |
| tet(32)      | 33A | 29.8  | 81.02 | 1.93 |                              |
| tet(34)      | 33A | 30.44 | 75.7  | 1.96 |                              |
| tet(35)      | 33A |       |       |      | LowEfficiency, CtIsSmall, Ci |
| tet(36)-A    | 33A | 36.24 | 81.86 | 1.85 |                              |
| tet(36)-B    | 33A |       |       |      | LowEfficiency, CtIsSmall, Ci |
| tet(37)      | 33A | 31.74 | 86.62 | 1.95 |                              |
| tetA-01      | 33A | 28.93 | 85.11 | 1.94 |                              |
| tetA-02      | 33A |       |       |      | BadR2, LowEfficiency, CtIsS  |
| tetB-01      | 33A | 32.03 | 87.79 | 1.98 |                              |
| tetB-02      | 33A |       |       |      | LowEfficiency, CtIsSmall, Ci |
| tetC-01      | 33A |       |       |      | NoAmplification              |
| tetC-02      | 33A |       |       |      | LowEfficiency, CtIsSmall, Ci |
| tetD-01      | 33A |       |       |      | LowEfficiency, CtIsSmall, Ci |
| tetD-02      | 33A | 35.81 | 76.01 | 1.93 | MultipleMeltPeaks            |
| tetE         | 33A |       |       |      | CurveFitFailed               |
| tetG-01      | 33A | 33.37 | 85.45 | 2.03 |                              |
| tetG-02      | 33A | 32.34 | 83.65 | 1.83 | MultipleMeltPeaks            |
| tetH         | 33A |       |       |      | LowEfficiency, CtIsSmall, Ci |
| tetJ         | 33A |       |       |      | LowEfficiency, CtIsSmall, Ci |
| tetK         | 33A |       |       |      | LowEfficiency, CtIsSmall, Ci |
| tetL-01      | 33A | 35.99 | 80.79 | 1.81 | MultipleMeltPeaks            |
| tetL-02      | 33A | 30.46 | 85.12 | 1.85 | MultipleMeltPeaks            |
| tetM-01      | 33A | 25.32 | 75.81 | 1.93 | MultipleMeltPeaks            |
| tetM-02      | 33A | 25.22 | 77.53 | 2.05 |                              |
| tetO-01      | 33A | 29.34 | 76.54 | 2.02 |                              |
| tetPA        | 33A |       |       |      | NoAmplification              |
| tetPB-01     | 33A |       |       |      | BadR2, LowEfficiency, CtIsS  |
| tetPB-02     | 33A | 28.2  | 84.79 | 2.15 |                              |
| tetPB-03     | 33A |       |       |      | LowEfficiency, CtIsSmall, Ci |
| tetPB-05     | 33A |       |       |      | CurveFitFailed               |
| tetQ         | 33A |       |       |      | CurveFitFailed               |
| tetR-02      | 33A | 30.4  | 90.04 | 1.85 |                              |
| tetR-03      | 33A |       |       |      | CurveFitFailed               |
| tetS         | 33A | 34.97 | 85.26 | 2    |                              |

|             |     |       |       |      |                              |
|-------------|-----|-------|-------|------|------------------------------|
| tetT        | 33A |       |       |      | LowEfficiency, CtIsSmall, Ci |
| tetU-01     | 33A |       |       |      | NoAmplification              |
| tetV        | 33A |       |       |      | LowEfficiency, CtIsSmall, S  |
| tetW-01     | 33A |       |       |      | LowEfficiency, CtIsSmall, Ci |
| tetX        | 33A |       |       |      | BadR2, CtIsSmall, CurveFitf  |
| tnpA-01     | 33A |       |       |      | LowEfficiency, CtIsSmall, Ci |
| tnpA-02     | 33A | 33.75 | 85.06 | 1.83 | MultipleMeltPeaks            |
| tnpA-03     | 33A | 33.78 | 87.51 | 1.71 |                              |
| tnpA-04     | 33A |       |       |      | NoAmplification              |
| tnpA-05     | 33A |       |       |      | LowEfficiency, CtIsSmall, Ci |
| tnpA-07     | 33A |       |       |      | NoAmplification              |
| tolC-01     | 33A | 35.15 | 80.49 | 1.88 | MultipleMeltPeaks            |
| tolC-02     | 33A | 29.5  | 87.58 | 2.02 | MultipleMeltPeaks            |
| tolC-03     | 33A | 29.16 | 85.65 | 2.02 |                              |
| Tp614       | 33A | 34.28 | 81.99 | 1.99 | MultipleMeltPeaks            |
| ttgA        | 33A |       |       |      | CurveFitFailed               |
| ttgB        | 33A | 34.75 | 78.94 | 1.96 |                              |
| vanA        | 33A |       |       |      | NoAmplification              |
| vanB-01     | 33A | 32.02 | 84.69 | 2.02 |                              |
| vanC-01     | 33A |       |       |      | LowEfficiency, CtIsSmall, Ci |
| vanC-02     | 33A |       |       |      | LowEfficiency, CtIsSmall, Ci |
| vanC-03     | 33A | 25.19 | 85.82 | 2.01 | MultipleMeltPeaks            |
| vanC1       | 33A |       |       |      | NoAmplification              |
| vanC2/vanC3 | 33A | 34.39 | 82.36 | 1.96 |                              |
| vanG        | 33A |       |       |      | LowEfficiency, CtIsSmall, Ci |
| vanHB       | 33A |       |       |      | LowEfficiency, CtIsSmall, Ci |
| vanHD       | 33A | 33.75 | 84.79 | 1.9  | MultipleMeltPeaks            |
| vanRA-01    | 33A |       |       |      | LowEfficiency, CtIsSmall, Ci |
| vanRA-02    | 33A |       |       |      | NoAmplification              |
| vanRB       | 33A | 30.72 | 87.45 | 2.05 |                              |
| vanRC       | 33A | 36.02 | 75.88 | 1.85 |                              |
| vanRC4      | 33A |       |       |      | LowEfficiency, CtIsSmall, Ci |
| vanRD       | 33A |       |       |      | CurveFitFailed               |
| vanSA       | 33A |       |       |      | CurveFitFailed               |
| vanSB       | 33A |       |       |      | LowEfficiency, CtIsSmall, Ci |
| vanSC-01    | 33A | 34.05 | 83.96 | 2.07 |                              |
| vanSC-02    | 33A |       |       |      | NoAmplification              |
| vanTC-01    | 33A |       |       |      | LowEfficiency, CtIsSmall, Ci |
| vanTC-02    | 33A | 34.66 | 91.45 | 1.9  | MultipleMeltPeaks            |
| vanTE       | 33A |       |       |      | NoAmplification              |
| vanTG       | 33A | 36.59 | 73.44 | 1.95 | MultipleMeltPeaks            |
| vanWB       | 33A |       |       |      | BadR2, CtIsSmall, Saturatio  |
| vanWG       | 33A |       |       |      | CurveFitFailed               |
| vanXA       | 33A |       |       |      | LowEfficiency, CtIsSmall, Ci |
| vanXB       | 33A |       |       |      | NoAmplification              |
| vanXD       | 33A | 31.88 | 75.07 | 1.95 |                              |

|              |     |       |       |      |                              |
|--------------|-----|-------|-------|------|------------------------------|
| vanYB        | 33A | 34.82 | 81.27 | 1.97 |                              |
| vanYD-01     | 33A | 30.57 | 82.55 | 1.8  |                              |
| vanYD-02     | 33A | 35.76 | 76.36 | 1.92 |                              |
| vatB-01      | 33A |       |       |      | NoAmplification              |
| vatB-02      | 33A | 35.24 | 81.23 | 2.09 | MultipleMeltPeaks            |
| vatC-01      | 33A | 32.68 | 81.13 | 1.9  |                              |
| vatC-02      | 33A | 34.43 | 86.27 | 1.86 |                              |
| vatE-01      | 33A | 31.3  | 76.56 | 2.05 |                              |
| vatE-02      | 33A |       |       |      | NoAmplification              |
| vgaA-01      | 33A |       |       |      | CurveFitFailed               |
| vgaA-02      | 33A |       |       |      | CurveFitFailed               |
| vgb-01       | 33A | 35.65 | 79.29 | 1.93 |                              |
| vgbB-01      | 33A |       |       |      | LowEfficiency, CtIsSmall, Ci |
| vgbB-02      | 33A |       |       |      | LowEfficiency, CtIsSmall, Ci |
| yceE/mdtG-0  | 33A |       |       |      | CurveFitFailed               |
| yceE/mdtG-0  | 33A |       |       |      | LowEfficiency, CtIsSmall, Ci |
| yceL/mdtH-0  | 33A | 31.41 | 84.11 | 2.04 | MultipleMeltPeaks            |
| yceL/mdtH-0  | 33A |       |       |      | LowEfficiency, CtIsSmall, Ci |
| yceL/mdtH-0  | 33A | 32.88 | 88.76 | 2    |                              |
| yidY/mdtL-01 | 33A | 31.23 | 88.61 | 2.07 | MultipleMeltPeaks            |
| yidY/mdtL-02 | 33A |       |       |      | NoAmplification              |































| Assay          | Sample | Ct | Tm    | Efficiency | flag                         |
|----------------|--------|----|-------|------------|------------------------------|
| 16S rRNA       | 33B    |    | 14.63 | 82.24      | 2.18                         |
| aac            | 33B    |    |       |            | CurveFitFailed               |
| aac(6')-Ib(akz | 33B    |    |       |            | LowEfficiency, CtIsSmall, Ci |
| aac(6')-Ib(akz | 33B    |    | 31.37 | 86.04      | 1.98 MultipleMeltPeaks       |
| aac(6')-Ib(akz | 33B    |    | 32.14 | 89.49      | 2.03                         |
| aac(6')-II     | 33B    |    | 31.89 | 87.76      | 1.77                         |
| aac(6')I1      | 33B    |    | 32.74 | 91.24      | 2.11                         |
| aacA/aphD      | 33B    |    |       |            | LowEfficiency, CtIsSmall, Ci |
| aacC           | 33B    |    |       |            | CurveFitFailed               |
| aacC1          | 33B    |    |       |            | CurveFitFailed               |
| aacC2          | 33B    |    |       |            | LowEfficiency, CtIsSmall, Ci |
| aacC4          | 33B    |    | 32.28 | 88.25      | 2.04                         |
| aadA-01        | 33B    |    |       |            | LowEfficiency, CtIsSmall, Ci |
| aadA-02        | 33B    |    | 33.43 | 86.54      | 1.94 MultipleMeltPeaks       |
| aadA-1-01      | 33B    |    | 35.18 | 81.27      | 2.03 MultipleMeltPeaks       |
| aadA-1-02      | 33B    |    |       |            | LowEfficiency, CtIsSmall, Ci |
| aadA1          | 33B    |    | 32.8  | 84.7       | 2.48                         |
| aadA2-01       | 33B    |    | 32.94 | 90.78      | 1.88                         |
| aadA2-02       | 33B    |    | 30.1  | 75.15      | 2.1                          |
| aadA2-03       | 33B    |    |       |            | LowEfficiency, CtIsSmall, Ci |
| aadA5-01       | 33B    |    |       |            | CurveFitFailed               |
| aadA5-02       | 33B    |    | 31.06 | 87.02      | 1.97                         |
| aadA9-01       | 33B    |    |       |            | CurveFitFailed               |
| aadA9-02       | 33B    |    |       |            | CurveFitFailed               |
| aadD           | 33B    |    |       |            | LowEfficiency, CtIsSmall, Ci |
| aadE           | 33B    |    |       |            | CurveFitFailed               |
| acrA-01        | 33B    |    | 30.57 | 88.68      | 2.18                         |
| acrA-02        | 33B    |    | 31.8  | 85.24      | 1.9                          |
| acrA-03        | 33B    |    | 31.8  | 90.24      | 1.98                         |
| acrA-04        | 33B    |    | 30.32 | 80.33      | 1.91                         |
| acrA-05        | 33B    |    | 30.02 | 88.14      | 2.07                         |
| acrB-01        | 33B    |    | 32.95 | 81.33      | 1.98                         |
| acrF           | 33B    |    |       |            | CurveFitFailed               |
| acrR-01        | 33B    |    | 32.88 | 90.96      | 1.99                         |
| acrR-02        | 33B    |    | 33.92 | 85.21      | 1.98 MultipleMeltPeaks       |
| Actin          | 33B    |    | 19.27 | 86.9       | 2.17                         |
| adeA           | 33B    |    |       |            | LowEfficiency, CtIsSmall, Ci |
| ampC-01        | 33B    |    | 30.74 | 85.15      | 1.93 MultipleMeltPeaks       |
| ampC-02        | 33B    |    |       |            | LowEfficiency, CtIsSmall, S: |
| ampC-04        | 33B    |    | 30.5  | 85.93      | 1.58 MultipleMeltPeaks       |
| ampC-05        | 33B    |    |       |            | CurveFitFailed               |
| ampC-06        | 33B    |    |       |            | BadR2, LowEfficiency, CtIsS  |
| ampC-07        | 33B    |    |       |            | CurveFitFailed               |
| ampC-09        | 33B    |    |       |            | CurveFitFailed               |
| ampC/blaDH     | 33B    |    | 29.19 | 76.72      | 1.94 MultipleMeltPeaks       |

|                            |     |       |       |      |                              |
|----------------------------|-----|-------|-------|------|------------------------------|
| aph                        | 33B |       |       |      | LowEfficiency, CtIsSmall, Ci |
| aph(2')-Id-01              | 33B |       |       |      | LowEfficiency, CtIsSmall, Ci |
| aph(2')-Id-02              | 33B |       |       |      | NoAmplification              |
| aph6ia                     | 33B | 33.64 | 80.47 | 1.96 |                              |
| aphA1(aka k <sub>a</sub> ) | 33B |       |       |      | LowEfficiency, CtIsSmall, Ci |
| bacA-01                    | 33B | 32    | 86.67 | 1.91 |                              |
| bacA-02                    | 33B |       |       |      | CurveFitFailed               |
| BETA-globin                | 33B | 20.25 | 84.03 | 2.01 |                              |
| bla-ACC-1                  | 33B | 32.47 | 85.86 | 2.06 | MultipleMeltPeaks            |
| bla-L1                     | 33B | 29.35 | 85.49 | 2.06 |                              |
| bla1                       | 33B |       |       |      | CurveFitFailed               |
| blaCMY                     | 33B |       |       |      | CurveFitFailed               |
| blaCMY2-01                 | 33B |       |       |      | CurveFitFailed               |
| blaCMY2-02                 | 33B | 28    | 82.61 | 2.08 | MultipleMeltPeaks            |
| blaCTX-M-01                | 33B | 27.36 | 87.56 | 2.01 |                              |
| blaCTX-M-02                | 33B | 31.74 | 84.85 | 1.93 | MultipleMeltPeaks            |
| blaCTX-M-03                | 33B |       |       |      | BadR2, LowEfficiency, CtIsS  |
| blaCTX-M-04                | 33B | 30.74 | 90.34 | 2.2  |                              |
| blaCTX-M-05                | 33B |       |       |      | CurveFitFailed               |
| blaCTX-M-06                | 33B |       |       |      | LowEfficiency, CtIsSmall, Ci |
| blaGES                     | 33B |       |       |      | CurveFitFailed               |
| blaIMP-01                  | 33B |       |       |      | CurveFitFailed               |
| blaIMP-02                  | 33B |       |       |      | CurveFitFailed               |
| blaMOX/blaC                | 33B |       |       |      | LowEfficiency, CtIsSmall, Ci |
| blaOCH                     | 33B |       |       |      | NoAmplification              |
| blaOKP                     | 33B |       |       |      | NoAmplification              |
| blaOXA1/blaC               | 33B |       |       |      | LowEfficiency, CtIsSmall, Ci |
| blaOXA10-01                | 33B |       |       |      | LowEfficiency, CtIsSmall, Ci |
| blaOXA10-02                | 33B |       |       |      | LowEfficiency, CtIsSmall, Ci |
| blaOXY                     | 33B | 30.53 | 89.72 | 1.96 |                              |
| blaPAO                     | 33B |       |       |      | LowEfficiency, CtIsSmall, Ci |
| blaPER                     | 33B |       |       |      | LowEfficiency, CtIsSmall, Ci |
| blaPSE                     | 33B |       |       |      | CurveFitFailed               |
| blaROB                     | 33B |       |       |      | BadR2, LowEfficiency, CtIsS  |
| blaSFO                     | 33B | 29.55 | 89.59 | 2.07 |                              |
| blaSHV-01                  | 33B |       |       |      | CurveFitFailed               |
| blaSHV-02                  | 33B |       |       |      | CurveFitFailed               |
| blaTEM                     | 33B |       |       |      | LowEfficiency, CtIsSmall, Ci |
| blaTLA                     | 33B |       |       |      | LowEfficiency, CtIsSmall, Ci |
| blaVEB                     | 33B |       |       |      | LowEfficiency, CtIsSmall, Ci |
| blaVIM                     | 33B |       |       |      | CurveFitFailed               |
| blaZ                       | 33B |       |       |      | LowEfficiency, CtIsSmall, Ci |
| carB                       | 33B |       |       |      | LowEfficiency, CtIsSmall, Ci |
| catA1                      | 33B |       |       |      | NoAmplification              |
| catB3                      | 33B | 30.16 | 87.54 | 2.08 |                              |
| catB8                      | 33B |       |       |      | CurveFitFailed               |

|            |     |       |       |      |                              |
|------------|-----|-------|-------|------|------------------------------|
| ceoA       | 33B | 26.6  | 82.2  | 1.99 | MultipleMeltPeaks            |
| cepA       | 33B |       |       |      | LowEfficiency, CtIsSmall, Ci |
| cfiA       | 33B | 31.52 | 85.92 | 1.91 | MultipleMeltPeaks            |
| cfr        | 33B |       |       |      | LowEfficiency, CtIsSmall, S: |
| cfxA       | 33B | 23.94 | 77.32 | 2.01 |                              |
| cmeA       | 33B |       |       |      | CurveFitFailed               |
| cmlA1-01   | 33B | 32.75 | 89.5  | 2.04 | MultipleMeltPeaks            |
| cmlA1-02   | 33B |       |       |      | CurveFitFailed               |
| cmr        | 33B |       |       |      | CurveFitFailed               |
| cmx(A)     | 33B | 25.59 | 84.55 | 2.05 | MultipleMeltPeaks            |
| cphA-01    | 33B | 30.67 | 85.54 | 1.93 | MultipleMeltPeaks            |
| cphA-02    | 33B | 31.32 | 82.38 | 1.92 |                              |
| dfrA1      | 33B | 32.8  | 78.11 | 2.02 |                              |
| dfrA12     | 33B |       |       |      | CurveFitFailed               |
| emrD       | 33B |       |       |      | CurveFitFailed               |
| ereA       | 33B |       |       |      | BadR2, LowEfficiency, CtIsS  |
| ereB       | 33B |       |       |      | CurveFitFailed               |
| erm(34)    | 33B |       |       |      | LowEfficiency, CtIsSmall, Ci |
| erm(35)    | 33B |       |       |      | LowEfficiency, CtIsSmall, Ci |
| erm(36)    | 33B |       |       |      | CurveFitFailed               |
| ermA       | 33B |       |       |      | LowEfficiency, CtIsSmall, Ci |
| ermA/ermTR | 33B |       |       |      | BadR2, LowEfficiency, CtIsS  |
| ermB       | 33B | 18.89 | 74.67 | 2.37 |                              |
| ermC       | 33B |       |       |      | BadR2, LowEfficiency, CtIsS  |
| ermF       | 33B |       |       |      | LowEfficiency, CtIsSmall, Ci |
| ermJ/ermD  | 33B |       |       |      | LowEfficiency, CtIsSmall, Ci |
| ermK-01    | 33B |       |       |      | CurveFitFailed               |
| ermK-02    | 33B | 33.63 | 85.59 | 1.9  |                              |
| ermT-01    | 33B |       |       |      | LowEfficiency, CtIsSmall, Ci |
| ermT-02    | 33B |       |       |      | CurveFitFailed               |
| ermX       | 33B | 21.69 | 83.9  | 1.88 |                              |
| ermY       | 33B |       |       |      | LowEfficiency, CtIsSmall, Ci |
| fabK       | 33B | 19.67 | 77.47 | 2.34 |                              |
| floR       | 33B |       |       |      | CurveFitFailed               |
| folA       | 33B |       |       |      | NoAmplification              |
| fosB       | 33B |       |       |      | LowEfficiency, CtIsSmall, Ci |
| fosX       | 33B |       |       |      | LowEfficiency, CtIsSmall, Ci |
| fox5       | 33B |       |       |      | CurveFitFailed               |
| imiR       | 33B |       |       |      | LowEfficiency, CtIsSmall, Ci |
| ImrA-01    | 33B | 31.91 | 88.72 | 1.93 |                              |
| intl       | 33B | 28.99 | 85.99 | 2.08 | MultipleMeltPeaks            |
| intl1      | 33B | 19.45 | 87.28 | 2.28 |                              |
| IS613      | 33B |       |       |      | CurveFitFailed               |
| lnuA-01    | 33B |       |       |      | CurveFitFailed               |
| lnuB-01    | 33B |       |       |      | LowEfficiency, CtIsSmall, Ci |
| lnuB-02    | 33B |       |       |      | CurveFitFailed               |

|                |     |       |       |      |                              |
|----------------|-----|-------|-------|------|------------------------------|
| lnuC           | 33B | 30.86 | 87.04 | 1.83 |                              |
| marR-01        | 33B | 33.01 | 78.74 | 1.98 | MultipleMeltPeaks            |
| matA/mel       | 33B | 18.15 | 77.45 | 2.26 |                              |
| mdet1          | 33B |       |       |      | LowEfficiency, CtIsSmall, Ci |
| mdtA           | 33B |       |       |      | BadR2, LowEfficiency, CtIsS  |
| mdtE/yhiU      | 33B | 32.75 | 89.11 | 1.86 |                              |
| mecA           | 33B |       |       |      | LowEfficiency, CtIsSmall, Ci |
| mefA           | 33B | 17.52 | 80.43 | 2.1  |                              |
| mepA           | 33B |       |       |      | CurveFitFailed               |
| mexA           | 33B |       |       |      | CurveFitFailed               |
| mexD           | 33B | 31.5  | 80.25 | 1.95 |                              |
| mexE           | 33B | 33.87 | 82.43 | 1.99 |                              |
| mexF           | 33B |       |       |      | CurveFitFailed               |
| mphA-01        | 33B | 28.83 | 88.14 | 2.08 | MultipleMeltPeaks            |
| mphA-02        | 33B |       |       |      | CurveFitFailed               |
| mphB           | 33B |       |       |      | LowEfficiency, CtIsSmall, Ci |
| mphC           | 33B |       |       |      | LowEfficiency, CtIsSmall, Ci |
| msrA-01        | 33B |       |       |      | LowEfficiency, CtIsSmall, Ci |
| msrC-01        | 33B |       |       |      | LowEfficiency, CtIsSmall, Ci |
| mtrC-01        | 33B |       |       |      | CurveFitFailed               |
| mtrC-02        | 33B | 31.37 | 84.45 | 1.93 |                              |
| mtrD-02        | 33B |       |       |      | CurveFitFailed               |
| mtrD-03        | 33B |       |       |      | CurveFitFailed               |
| NDM1           | 33B |       |       |      | LowEfficiency, CtIsSmall, Ci |
| nimE           | 33B |       |       |      | LowEfficiency, CtIsSmall, Ci |
| nisB           | 33B |       |       |      | LowEfficiency, CtIsSmall, Ci |
| oleC           | 33B | 31.4  | 89.52 | 1.96 |                              |
| oprD           | 33B |       |       |      | CurveFitFailed               |
| oprJ           | 33B | 30.18 | 89.23 | 2.04 |                              |
| pbp            | 33B |       |       |      | BadR2, LowEfficiency, CtIsS  |
| pbp2x          | 33B | 19.92 | 75.57 | 2.1  |                              |
| Pbp5           | 33B |       |       |      | LowEfficiency, CtIsSmall, Ci |
| penA           | 33B | 30.87 | 84.37 | 1.8  | MultipleMeltPeaks            |
| pikR1          | 33B |       |       |      | BadR2, LowEfficiency, CtIsS  |
| pikR2          | 33B |       |       |      | CurveFitFailed               |
| pmrA           | 33B | 19.86 | 79.87 | 2.15 |                              |
| pncA           | 33B | 30.24 | 88.35 | 2.14 | MultipleMeltPeaks            |
| putative multi | 33B |       |       |      | LowEfficiency, CtIsSmall, Ci |
| qac            | 33B |       |       |      | CurveFitFailed               |
| qacA           | 33B |       |       |      | LowEfficiency, CtIsSmall, Ci |
| qacA/qacB      | 33B |       |       |      | LowEfficiency, CtIsSmall, Ci |
| qacEdelta1-0   | 33B |       |       |      | LowEfficiency, CtIsSmall, Ci |
| qacEdelta1-0   | 33B | 30.98 | 89.43 | 1.98 |                              |
| qacH-01        | 33B | 32.17 | 87.04 | 2.1  |                              |
| qacH-02        | 33B | 31.68 | 84.02 | 1.74 |                              |
| qnrA           | 33B |       |       |      | CurveFitFailed               |



|              |     |       |       |      |                              |
|--------------|-----|-------|-------|------|------------------------------|
| rarD-02      | 33B |       |       |      | CurveFitFailed               |
| sat4         | 33B |       |       |      | LowEfficiency, CtIsSmall, Ci |
| sdeB         | 33B | 33.96 | 75.85 | 1.99 |                              |
| spcN-01      | 33B |       |       |      | LowEfficiency, CtIsSmall, Ci |
| speA         | 33B |       |       |      | LowEfficiency, CtIsSmall, Ci |
| str          | 33B |       |       |      | LowEfficiency, CtIsSmall, Ci |
| strA         | 33B |       |       |      | CurveFitFailed               |
| strB         | 33B |       |       |      | CurveFitFailed               |
| sul1         | 33B | 33.23 | 89.6  | 1.98 |                              |
| sul2         | 33B |       |       |      | LowEfficiency, CtIsSmall, Ci |
| sulA/foIP-01 | 33B | 18.76 | 81.45 | 2.12 |                              |
| sulA/foIP-03 | 33B | 19.41 | 83.23 | 2.03 |                              |
| tet(32)      | 33B |       |       |      | LowEfficiency, CtIsSmall, Ci |
| tet(34)      | 33B | 31.32 | 75.39 | 1.91 |                              |
| tet(35)      | 33B |       |       |      | CurveFitFailed               |
| tet(36)-A    | 33B |       |       |      | BadR2, LowEfficiency, CtIsS  |
| tet(36)-B    | 33B |       |       |      | LowEfficiency, CtIsSmall, Ci |
| tet(37)      | 33B | 29.95 | 84.21 | 2.03 | MultipleMeltPeaks            |
| tetA-01      | 33B | 29.85 | 85.05 | 1.94 |                              |
| tetA-02      | 33B |       |       |      | CurveFitFailed               |
| tetB-01      | 33B | 32.79 | 86.09 | 2.03 |                              |
| tetB-02      | 33B |       |       |      | CurveFitFailed               |
| tetC-01      | 33B |       |       |      | LowEfficiency, CtIsSmall, Ci |
| tetC-02      | 33B |       |       |      | BadR2, LowEfficiency, CtIsS  |
| tetD-01      | 33B |       |       |      | LowEfficiency, CtIsSmall, Ci |
| tetD-02      | 33B |       |       |      | LowEfficiency, CtIsSmall, Ci |
| tetE         | 33B |       |       |      | LowEfficiency, CtIsSmall, Ci |
| tetG-01      | 33B | 31.51 | 84.86 | 2.01 | MultipleMeltPeaks            |
| tetG-02      | 33B |       |       |      | CurveFitFailed               |
| tetH         | 33B |       |       |      | LowEfficiency, CtIsSmall, Ci |
| tetJ         | 33B |       |       |      | LowEfficiency, CtIsSmall, Ci |
| tetK         | 33B |       |       |      | LowEfficiency, CtIsSmall, Ci |
| tetL-01      | 33B |       |       |      | LowEfficiency, CtIsSmall, Ci |
| tetL-02      | 33B | 31.34 | 85.19 | 1.84 |                              |
| tetM-01      | 33B | 19.56 | 75.65 | 2.11 |                              |
| tetM-02      | 33B | 19.39 | 77.5  | 2.29 |                              |
| tetO-01      | 33B |       |       |      | LowEfficiency, CtIsSmall, Ci |
| tetPA        | 33B |       |       |      | LowEfficiency, CtIsSmall, Ci |
| tetPB-01     | 33B |       |       |      | LowEfficiency, CtIsSmall, Ci |
| tetPB-02     | 33B | 28.31 | 84.81 | 2.21 |                              |
| tetPB-03     | 33B |       |       |      | LowEfficiency, CtIsSmall, Ci |
| tetPB-05     | 33B |       |       |      | CurveFitFailed               |
| tetQ         | 33B | 23.21 | 77.17 | 2.12 |                              |
| tetR-02      | 33B | 29.34 | 90.39 | 1.88 | MultipleMeltPeaks            |
| tetR-03      | 33B |       |       |      | LowEfficiency, CtIsSmall, Ci |
| tetS         | 33B |       |       |      | CurveFitFailed               |

|             |     |       |       |      |                              |
|-------------|-----|-------|-------|------|------------------------------|
| tetT        | 33B |       |       |      | LowEfficiency, CtIsSmall, S  |
| tetU-01     | 33B |       |       |      | LowEfficiency, CtIsSmall, Ci |
| tetV        | 33B |       |       |      | BadR2, LowEfficiency, CtIsS  |
| tetW-01     | 33B | 22.09 | 81.69 | 2.09 |                              |
| tetX        | 33B |       |       |      | BadR2, LowEfficiency, CtIsS  |
| tnpA-01     | 33B |       |       |      | CurveFitFailed               |
| tnpA-02     | 33B |       |       |      | CurveFitFailed               |
| tnpA-03     | 33B | 31.79 | 76.97 | 1.91 |                              |
| tnpA-04     | 33B |       |       |      | LowEfficiency, CtIsSmall, Ci |
| tnpA-05     | 33B |       |       |      | LowEfficiency, CtIsSmall, Ci |
| tnpA-07     | 33B |       |       |      | LowEfficiency, CtIsSmall, Ci |
| tolC-01     | 33B |       |       |      | CurveFitFailed               |
| tolC-02     | 33B | 29.99 | 87.54 | 2.09 | MultipleMeltPeaks            |
| tolC-03     | 33B | 30.03 | 85.63 | 2.04 |                              |
| Tp614       | 33B | 33.43 | 83.17 | 2.06 | MultipleMeltPeaks            |
| ttgA        | 33B |       |       |      | LowEfficiency, CtIsSmall, S  |
| ttgB        | 33B |       |       |      | NoAmplification              |
| vanA        | 33B |       |       |      | LowEfficiency, CtIsSmall, Ci |
| vanB-01     | 33B | 30.25 | 84.17 | 1.99 | MultipleMeltPeaks            |
| vanC-01     | 33B |       |       |      | LowEfficiency, CtIsSmall, Ci |
| vanC-02     | 33B |       |       |      | LowEfficiency, CtIsSmall, Ci |
| vanC-03     | 33B | 25.34 | 91.23 | 2.17 |                              |
| vanC1       | 33B |       |       |      | LowEfficiency, CtIsSmall, Ci |
| vanC2/vanC3 | 33B |       |       |      | CurveFitFailed               |
| vanG        | 33B |       |       |      | LowEfficiency, CtIsSmall, Ci |
| vanHB       | 33B |       |       |      | CurveFitFailed               |
| vanHD       | 33B |       |       |      | BadR2, LowEfficiency, CtIsS  |
| vanRA-01    | 33B |       |       |      | LowEfficiency, CtIsSmall, Ci |
| vanRA-02    | 33B |       |       |      | LowEfficiency, CtIsSmall, Ci |
| vanRB       | 33B |       |       |      | CurveFitFailed               |
| vanRC       | 33B |       |       |      | LowEfficiency, CtIsSmall, Ci |
| vanRC4      | 33B |       |       |      | LowEfficiency, CtIsSmall, S  |
| vanRD       | 33B |       |       |      | LowEfficiency, CtIsSmall, Ci |
| vanSA       | 33B |       |       |      | LowEfficiency, CtIsSmall, Ci |
| vanSB       | 33B |       |       |      | CurveFitFailed               |
| vanSC-01    | 33B | 31.52 | 83.95 | 1.89 |                              |
| vanSC-02    | 33B |       |       |      | NoAmplification              |
| vanTC-01    | 33B |       |       |      | CurveFitFailed               |
| vanTC-02    | 33B | 30.9  | 88.27 | 2.1  |                              |
| vanTE       | 33B |       |       |      | BadR2, LowEfficiency, CtIsS  |
| vanTG       | 33B |       |       |      | CurveFitFailed               |
| vanWB       | 33B |       |       |      | BadR2, LowEfficiency, CtIsS  |
| vanWG       | 33B |       |       |      | LowEfficiency, CtIsSmall, Ci |
| vanXA       | 33B |       |       |      | CurveFitFailed               |
| vanXB       | 33B |       |       |      | LowEfficiency, CtIsSmall, Ci |
| vanXD       | 33B |       |       |      | LowEfficiency, CtIsSmall, Ci |

|              |     |       |       |      |                              |
|--------------|-----|-------|-------|------|------------------------------|
| vanYB        | 33B |       |       |      | BadR2, LowEfficiency, CtIsS  |
| vanYD-01     | 33B |       |       |      | CurveFitFailed               |
| vanYD-02     | 33B |       |       |      | CurveFitFailed               |
| vatB-01      | 33B |       |       |      | LowEfficiency, CtIsSmall, Ci |
| vatB-02      | 33B |       |       |      | CurveFitFailed               |
| vatC-01      | 33B |       |       |      | CurveFitFailed               |
| vatC-02      | 33B |       |       |      | CurveFitFailed               |
| vatE-01      | 33B |       |       |      | CurveFitFailed               |
| vatE-02      | 33B |       |       |      | LowEfficiency, CtIsSmall, Ci |
| vgaA-01      | 33B |       |       |      | LowEfficiency, CtIsSmall, Ci |
| vgaA-02      | 33B |       |       |      | CurveFitFailed               |
| vgb-01       | 33B |       |       |      | CurveFitFailed               |
| vgbB-01      | 33B |       |       |      | CurveFitFailed               |
| vgbB-02      | 33B |       |       |      | LowEfficiency, CtIsSmall, Ci |
| yceE/mdtG-0  | 33B |       |       |      | LowEfficiency, CtIsSmall, Ci |
| yceE/mdtG-0  | 33B |       |       |      | LowEfficiency, CtIsSmall, Ci |
| yceL/mdtH-0  | 33B |       |       |      | CurveFitFailed               |
| yceL/mdtH-0  | 33B |       |       |      | LowEfficiency, CtIsSmall, Ci |
| yceL/mdtH-0  | 33B |       |       |      | CurveFitFailed               |
| yidY/mdtL-01 | 33B | 32.35 | 84.66 | 2.06 | MultipleMeltPeaks            |
| yidY/mdtL-02 | 33B |       |       |      | CurveFitFailed               |































| Assay          | Sample | Ct | Tm    | Efficiency | flag                         |
|----------------|--------|----|-------|------------|------------------------------|
| 16S rRNA       | 33C    |    | 17.12 | 82.36      | 2.08                         |
| aac            | 33C    |    | 29.74 | 80.76      | 1.84 MultipleMeltPeaks       |
| aac(6')-Ib(akz | 33C    |    |       |            | LowEfficiency, CtIsSmall, Ci |
| aac(6')-Ib(akz | 33C    |    | 30.74 | 81.93      | 1.97                         |
| aac(6')-Ib(akz | 33C    |    | 31.2  | 85.87      | 2.04 MultipleMeltPeaks       |
| aac(6')-II     | 33C    |    | 33.01 | 80.85      | 1.62 MultipleMeltPeaks       |
| aac(6')I1      | 33C    |    |       |            | LowEfficiency, CtIsSmall, S  |
| aacA/aphD      | 33C    |    |       |            | LowEfficiency, CtIsSmall, Ci |
| aacC           | 33C    |    | 30.63 | 91.94      | 1.99 MultipleMeltPeaks       |
| aacC1          | 33C    |    |       |            | LowEfficiency, CtIsSmall, Ci |
| aacC2          | 33C    |    |       |            | LowEfficiency, CtIsSmall, Ci |
| aacC4          | 33C    |    | 34.05 | 89.37      | 1.94                         |
| aadA-01        | 33C    |    |       |            | LowEfficiency, CtIsSmall, Ci |
| aadA-02        | 33C    |    | 35.64 | 80.34      | 1.95                         |
| aadA-1-01      | 33C    |    | 33.57 | 86.69      | 1.94                         |
| aadA-1-02      | 33C    |    |       |            | LowEfficiency, CtIsSmall, Ci |
| aadA1          | 33C    |    | 33.27 | 83.64      | 2.04                         |
| aadA2-01       | 33C    |    |       |            | CurveFitFailed               |
| aadA2-02       | 33C    |    | 30.77 | 75.27      | 2.02                         |
| aadA2-03       | 33C    |    |       |            | LowEfficiency, CtIsSmall, Ci |
| aadA5-01       | 33C    |    | 34.82 | 88.5       | 1.91                         |
| aadA5-02       | 33C    |    | 31.68 | 87.88      | 1.98                         |
| aadA9-01       | 33C    |    | 32.77 | 89.54      | 1.89                         |
| aadA9-02       | 33C    |    |       |            | BadR2, LowEfficiency, CtIsS  |
| aadD           | 33C    |    |       |            | LowEfficiency, CtIsSmall, Ci |
| aadE           | 33C    |    |       |            | CurveFitFailed               |
| acrA-01        | 33C    |    | 30.59 | 88.69      | 2.02                         |
| acrA-02        | 33C    |    |       |            | BadR2, LowEfficiency, CtIsS  |
| acrA-03        | 33C    |    | 36.03 | 76.01      | 1.87 MultipleMeltPeaks       |
| acrA-04        | 33C    |    | 30.36 | 80.44      | 1.96                         |
| acrA-05        | 33C    |    | 30    | 85.67      | 2 MultipleMeltPeaks          |
| acrB-01        | 33C    |    |       |            | LowEfficiency, CtIsSmall, Ci |
| acrF           | 33C    |    | 30.71 | 81.9       | 1.89 MultipleMeltPeaks       |
| acrR-01        | 33C    |    | 32.88 | 90         | 1.94                         |
| acrR-02        | 33C    |    | 31.76 | 82.99      | 1.92 MultipleMeltPeaks       |
| Actin          | 33C    |    | 19.83 | 86.85      | 2.01                         |
| adeA           | 33C    |    |       |            | BadR2, LowEfficiency, CtIsS  |
| ampC-01        | 33C    |    | 29.45 | 85.48      | 2.02                         |
| ampC-02        | 33C    |    | 34.74 | 78.21      | 2.07 MultipleMeltPeaks       |
| ampC-04        | 33C    |    | 31.24 | 83.49      | 1.77 MultipleMeltPeaks       |
| ampC-05        | 33C    |    |       |            | LowEfficiency, CtIsSmall, Ci |
| ampC-06        | 33C    |    | 35.1  | 82.09      | 1.91                         |
| ampC-07        | 33C    |    | 33.53 | 88.36      | 1.94                         |
| ampC-09        | 33C    |    |       |            | LowEfficiency, CtIsSmall, Ci |
| ampC/blaDH     | 33C    |    | 27.7  | 85.29      | 2.03                         |

|                            |     |       |       |      |                                          |
|----------------------------|-----|-------|-------|------|------------------------------------------|
| aph                        | 33C |       |       |      | LowEfficiency, CtIsSmall, Ci             |
| aph(2')-Id-01              | 33C |       |       |      | LowEfficiency, CtIsSmall, Ci             |
| aph(2')-Id-02              | 33C |       |       |      | LowEfficiency, CtIsSmall, Ci             |
| aph6ia                     | 33C | 35.8  | 75.96 | 1.91 | MultipleMeltPeaks                        |
| aphA1(aka k <sub>a</sub> ) | 33C |       |       |      | LowEfficiency, CtIsSmall, Ci             |
| bacA-01                    | 33C | 34.12 | 86.62 | 1.94 |                                          |
| bacA-02                    | 33C | 32.43 | 88.79 | 1.86 |                                          |
| BETA-globin                | 33C | 21.14 | 84.01 | 1.99 |                                          |
| bla-ACC-1                  | 33C |       |       |      | CurveFitFailed                           |
| bla-L1                     | 33C | 27.84 | 85.67 | 2    |                                          |
| bla1                       | 33C |       |       |      | LowEfficiency, CtIsSmall, Ci             |
| blaCMY                     | 33C |       |       |      | LowEfficiency, CtIsSmall, S <sub>e</sub> |
| blaCMY2-01                 | 33C | 34.54 | 85.67 | 2.07 |                                          |
| blaCMY2-02                 | 33C | 28.27 | 85.18 | 2.01 | MultipleMeltPeaks                        |
| blaCTX-M-01                | 33C |       |       |      | LowEfficiency, CtIsSmall, Ci             |
| blaCTX-M-02                | 33C | 33.2  | 84.58 | 1.93 | MultipleMeltPeaks                        |
| blaCTX-M-03                | 33C |       |       |      | LowEfficiency, CtIsSmall, Ci             |
| blaCTX-M-04                | 33C | 34.65 | 86.55 | 1.75 | MultipleMeltPeaks                        |
| blaCTX-M-05                | 33C | 32.62 | 76.44 | 1.86 |                                          |
| blaCTX-M-06                | 33C |       |       |      | BadR2, LowEfficiency, CtIsS              |
| blaGES                     | 33C |       |       |      | LowEfficiency, CtIsSmall, Ci             |
| blaIMP-01                  | 33C |       |       |      | LowEfficiency, CtIsSmall, Ci             |
| blaIMP-02                  | 33C |       |       |      | LowEfficiency, CtIsSmall, Ci             |
| blaMOX/blaC                | 33C |       |       |      | NoAmplification                          |
| blaOCH                     | 33C |       |       |      | NoAmplification                          |
| blaOKP                     | 33C |       |       |      | NoAmplification                          |
| blaOXA1/blaC               | 33C |       |       |      | LowEfficiency, CtIsSmall, Ci             |
| blaOXA10-01                | 33C |       |       |      | LowEfficiency, CtIsSmall, Ci             |
| blaOXA10-02                | 33C |       |       |      | LowEfficiency, CtIsSmall, Ci             |
| blaOXY                     | 33C |       |       |      | BadR2, LowEfficiency, CtIsS              |
| blaPAO                     | 33C |       |       |      | LowEfficiency, CtIsSmall, Ci             |
| blaPER                     | 33C |       |       |      | LowEfficiency, CtIsSmall, Ci             |
| blaPSE                     | 33C |       |       |      | LowEfficiency, CtIsSmall, Ci             |
| blaROB                     | 33C |       |       |      | NoAmplification                          |
| blaSFO                     | 33C | 29.15 | 89.84 | 1.97 |                                          |
| blaSHV-01                  | 33C | 31.06 | 88.94 | 2.02 |                                          |
| blaSHV-02                  | 33C |       |       |      | CurveFitFailed                           |
| blaTEM                     | 33C | 25.6  | 78.92 | 1.78 |                                          |
| blaTLA                     | 33C |       |       |      | LowEfficiency, CtIsSmall, Ci             |
| blaVEB                     | 33C |       |       |      | LowEfficiency, CtIsSmall, Ci             |
| blaVIM                     | 33C |       |       |      | NoAmplification                          |
| blaZ                       | 33C |       |       |      | LowEfficiency, CtIsSmall, Ci             |
| carB                       | 33C |       |       |      | LowEfficiency, CtIsSmall, Ci             |
| catA1                      | 33C |       |       |      | NoAmplification                          |
| catB3                      | 33C | 33.8  | 87.56 | 1.87 |                                          |
| catB8                      | 33C | 28.78 | 81.95 | 2.02 |                                          |

|            |     |       |       |      |                              |
|------------|-----|-------|-------|------|------------------------------|
| ceoA       | 33C | 27.29 | 82.1  | 1.98 | MultipleMeltPeaks            |
| cepA       | 33C |       |       |      | LowEfficiency, CtIsSmall, Ci |
| cfiA       | 33C | 31.55 | 85.65 | 1.88 | MultipleMeltPeaks            |
| cfr        | 33C |       |       |      | CurveFitFailed               |
| cfxA       | 33C | 23.69 | 77.41 | 1.95 |                              |
| cmeA       | 33C |       |       |      | BadR2, LowEfficiency, CtIsS  |
| cmlA1-01   | 33C | 37.01 | 88.42 | 1.92 | MultipleMeltPeaks            |
| cmlA1-02   | 33C | 33.12 | 81.6  | 1.93 | MultipleMeltPeaks            |
| cmr        | 33C | 34.96 | 78.57 | 1.88 |                              |
| cmx(A)     | 33C | 27.52 | 87.49 | 2.03 | MultipleMeltPeaks            |
| cphA-01    | 33C | 32.18 | 85.56 | 1.9  | MultipleMeltPeaks            |
| cphA-02    | 33C | 34.04 | 82.31 | 1.99 |                              |
| dfrA1      | 33C | 36.55 | 78.33 | 2.01 |                              |
| dfrA12     | 33C | 35.71 | 77.19 | 1.84 | MultipleMeltPeaks            |
| emrD       | 33C | 34.15 | 89.49 | 1.82 |                              |
| ereA       | 33C | 35.85 | 82.83 | 1.89 |                              |
| ereB       | 33C | 37.01 | 85.59 | 1.79 | MultipleMeltPeaks            |
| erm(34)    | 33C |       |       |      | LowEfficiency, CtIsSmall, Ci |
| erm(35)    | 33C |       |       |      | LowEfficiency, CtIsSmall, Ci |
| erm(36)    | 33C | 32.21 | 87.51 | 1.88 |                              |
| ermA       | 33C |       |       |      | LowEfficiency, CtIsSmall, Ci |
| ermA/ermTR | 33C |       |       |      | LowEfficiency, CtIsSmall, Ci |
| ermB       | 33C | 20.75 | 74.87 | 2.1  |                              |
| ermC       | 33C |       |       |      | LowEfficiency, CtIsSmall, S; |
| ermF       | 33C |       |       |      | LowEfficiency, CtIsSmall, Ci |
| ermJ/ermD  | 33C |       |       |      | LowEfficiency, CtIsSmall, Ci |
| ermK-01    | 33C | 37.3  | 82.8  | 1.91 |                              |
| ermK-02    | 33C | 34.72 | 84.77 | 1.89 |                              |
| ermT-01    | 33C |       |       |      | LowEfficiency, CtIsSmall, Ci |
| ermT-02    | 33C |       |       |      | LowEfficiency, CtIsSmall, Ci |
| ermX       | 33C | 34.83 | 88.41 | 1.78 |                              |
| ermY       | 33C |       |       |      | LowEfficiency, CtIsSmall, Ci |
| fabK       | 33C | 19.17 | 77.51 | 2.3  |                              |
| floR       | 33C | 36.5  | 87.21 | 1.82 | MultipleMeltPeaks            |
| folA       | 33C |       |       |      | NoAmplification              |
| fosB       | 33C |       |       |      | LowEfficiency, CtIsSmall, S; |
| fosX       | 33C |       |       |      | LowEfficiency, CtIsSmall, Ci |
| fox5       | 33C | 27.49 | 86.15 | 1.92 |                              |
| imiR       | 33C |       |       |      | LowEfficiency, CtIsSmall, S; |
| ImrA-01    | 33C | 34.41 | 82.42 | 1.96 |                              |
| intl       | 33C | 29.23 | 85.2  | 2    |                              |
| intl1      | 33C | 19.77 | 87.26 | 2.07 |                              |
| IS613      | 33C | 27.86 | 79.42 | 2.05 |                              |
| lnuA-01    | 33C |       |       |      | LowEfficiency, CtIsSmall, Ci |
| lnuB-01    | 33C |       |       |      | LowEfficiency, CtIsSmall, S; |
| lnuB-02    | 33C | 35.24 | 86.82 | 1.95 |                              |

|               |     |       |       |      |                              |
|---------------|-----|-------|-------|------|------------------------------|
| lnuC          | 33C |       |       |      | CurveFitFailed               |
| marR-01       | 33C | 31.91 | 85.18 | 1.94 |                              |
| matA/mel      | 33C | 21.79 | 77.51 | 2.08 |                              |
| mdet1         | 33C |       |       |      | LowEfficiency, CtIsSmall, Ci |
| mdtA          | 33C |       |       |      | CurveFitFailed               |
| mdtE/yhiU     | 33C | 35.16 | 84.91 | 1.78 |                              |
| mecA          | 33C |       |       |      | LowEfficiency, CtIsSmall, Ci |
| mefA          | 33C | 21.29 | 80.4  | 2    |                              |
| mepA          | 33C | 36.34 | 85.17 | 1.92 | MultipleMeltPeaks            |
| mexA          | 33C |       |       |      | LowEfficiency, CtIsSmall, Ci |
| mexD          | 33C | 37.12 | 79.58 | 1.98 |                              |
| mexE          | 33C | 33.84 | 83.77 | 1.93 |                              |
| mexF          | 33C | 27.93 | 87.04 | 2.16 |                              |
| mphA-01       | 33C | 29.56 | 86.82 | 2.01 |                              |
| mphA-02       | 33C | 29.21 | 86.73 | 1.88 | MultipleMeltPeaks            |
| mphB          | 33C |       |       |      | CurveFitFailed               |
| mphC          | 33C |       |       |      | LowEfficiency, CtIsSmall, Ci |
| msrA-01       | 33C |       |       |      | LowEfficiency, CtIsSmall, Ci |
| msrC-01       | 33C |       |       |      | NoAmplification              |
| mtrC-01       | 33C |       |       |      | LowEfficiency, CtIsSmall, Ci |
| mtrC-02       | 33C | 33.32 | 84.24 | 1.98 |                              |
| mtrD-02       | 33C | 27.41 | 81.18 | 1.89 | MultipleMeltPeaks            |
| mtrD-03       | 33C | 35.91 | 84.32 | 1.87 |                              |
| NDM1          | 33C |       |       |      | LowEfficiency, CtIsSmall, S: |
| nimE          | 33C | 36.02 | 84.89 | 1.94 |                              |
| nisB          | 33C |       |       |      | LowEfficiency, CtIsSmall, Ci |
| oleC          | 33C | 36.59 | 89.14 | 1.85 | MultipleMeltPeaks            |
| oprD          | 33C | 28.66 | 86.7  | 2.02 |                              |
| oprJ          | 33C | 33.12 | 83.07 | 1.81 | MultipleMeltPeaks            |
| pbp           | 33C | 32.97 | 81.37 | 1.94 | MultipleMeltPeaks            |
| pbp2x         | 33C | 19.35 | 75.79 | 2.07 |                              |
| Pbp5          | 33C |       |       |      | LowEfficiency, CtIsSmall, Ci |
| penA          | 33C | 35.38 | 85.84 | 1.79 |                              |
| pikR1         | 33C | 35.53 | 91.51 | 1.89 | MultipleMeltPeaks            |
| pikR2         | 33C | 29    | 85.61 | 2.19 |                              |
| pmrA          | 33C | 20.5  | 79.6  | 2.05 |                              |
| pncA          | 33C | 33.1  | 81.24 | 1.94 | MultipleMeltPeaks            |
| putative muli | 33C |       |       |      | CurveFitFailed               |
| qac           | 33C |       |       |      | LowEfficiency, CtIsSmall, Ci |
| qacA          | 33C |       |       |      | LowEfficiency, CtIsSmall, Ci |
| qacA/qacB     | 33C |       |       |      | LowEfficiency, CtIsSmall, Ci |
| qacEdelta1-0  | 33C |       |       |      | LowEfficiency, CtIsSmall, Ci |
| qacEdelta1-0  | 33C | 33.19 | 85.34 | 1.98 |                              |
| qacH-01       | 33C | 30.81 | 86.34 | 2.01 |                              |
| qacH-02       | 33C | 30.01 | 84.13 | 1.79 |                              |
| qnrA          | 33C | 35.53 | 78.55 | 2    | MultipleMeltPeaks            |

|              |     |       |       |      |                              |
|--------------|-----|-------|-------|------|------------------------------|
| rarD-02      | 33C | 35.64 | 84.98 | 1.98 |                              |
| sat4         | 33C |       |       |      | LowEfficiency, CtIsSmall, Ci |
| sdeB         | 33C |       |       |      | LowEfficiency, CtIsSmall, S  |
| spcN-01      | 33C |       |       |      | LowEfficiency, CtIsSmall, Ci |
| speA         | 33C |       |       |      | LowEfficiency, CtIsSmall, Ci |
| str          | 33C |       |       |      | LowEfficiency, CtIsSmall, Ci |
| strA         | 33C |       |       |      | LowEfficiency, CtIsSmall, Ci |
| strB         | 33C |       |       |      | LowEfficiency, CtIsSmall, Ci |
| sul1         | 33C | 34.41 | 88.43 | 1.84 |                              |
| sul2         | 33C |       |       |      | LowEfficiency, CtIsSmall, Ci |
| sulA/foIP-01 | 33C | 20.28 | 80.4  | 2.08 |                              |
| sulA/foIP-03 | 33C | 19.09 | 83.08 | 2.08 |                              |
| tet(32)      | 33C |       |       |      | LowEfficiency, CtIsSmall, Ci |
| tet(34)      | 33C | 30.69 | 75.71 | 2.02 |                              |
| tet(35)      | 33C | 34.81 | 76.07 | 1.98 |                              |
| tet(36)-A    | 33C |       |       |      | LowEfficiency, CtIsSmall, Ci |
| tet(36)-B    | 33C |       |       |      | LowEfficiency, CtIsSmall, Ci |
| tet(37)      | 33C | 24.16 | 76.37 | 2    |                              |
| tetA-01      | 33C | 30.65 | 85.06 | 1.95 |                              |
| tetA-02      | 33C |       |       |      | LowEfficiency, CtIsSmall, Ci |
| tetB-01      | 33C | 30.43 | 86.26 | 1.98 |                              |
| tetB-02      | 33C |       |       |      | LowEfficiency, CtIsSmall, Ci |
| tetC-01      | 33C |       |       |      | NoAmplification              |
| tetC-02      | 33C |       |       |      | BadR2, LowEfficiency, CtIsS  |
| tetD-01      | 33C |       |       |      | LowEfficiency, CtIsSmall, Ci |
| tetD-02      | 33C | 33.97 | 84.87 | 1.98 |                              |
| tetE         | 33C |       |       |      | CurveFitFailed               |
| tetG-01      | 33C | 30.26 | 85.95 | 2.07 |                              |
| tetG-02      | 33C | 34.8  | 80.06 | 1.85 |                              |
| tetH         | 33C |       |       |      | LowEfficiency, CtIsSmall, Ci |
| tetJ         | 33C |       |       |      | LowEfficiency, CtIsSmall, Ci |
| tetK         | 33C |       |       |      | LowEfficiency, CtIsSmall, Ci |
| tetL-01      | 33C |       |       |      | CurveFitFailed               |
| tetL-02      | 33C | 34.02 | 85.2  | 1.72 |                              |
| tetM-01      | 33C | 20.24 | 76.04 | 2.08 |                              |
| tetM-02      | 33C | 20.05 | 77.59 | 2.14 |                              |
| tetO-01      | 33C | 26.45 | 76.64 | 2.03 |                              |
| tetPA        | 33C |       |       |      | LowEfficiency, CtIsSmall, Ci |
| tetPB-01     | 33C |       |       |      | LowEfficiency, CtIsSmall, Ci |
| tetPB-02     | 33C | 28.85 | 84.75 | 2.08 |                              |
| tetPB-03     | 33C |       |       |      | LowEfficiency, CtIsSmall, Ci |
| tetPB-05     | 33C |       |       |      | LowEfficiency, CtIsSmall, Ci |
| tetQ         | 33C | 24.38 | 77.34 | 2.06 |                              |
| tetR-02      | 33C | 30.07 | 89.38 | 1.82 |                              |
| tetR-03      | 33C |       |       |      | LowEfficiency, CtIsSmall, Ci |
| tetS         | 33C | 35.03 | 84.65 | 2    | MultipleMeltPeaks            |

|             |     |       |       |      |                              |
|-------------|-----|-------|-------|------|------------------------------|
| tetT        | 33C |       |       |      | LowEfficiency, CtIsSmall, Ci |
| tetU-01     | 33C |       |       |      | LowEfficiency, CtIsSmall, Ci |
| tetV        | 33C |       |       |      | LowEfficiency, CtIsSmall, Ci |
| tetW-01     | 33C | 24.6  | 81.8  | 2.02 |                              |
| tetX        | 33C |       |       |      | CurveFitFailed               |
| tnpA-01     | 33C | 36.08 | 77.25 | 2.04 |                              |
| tnpA-02     | 33C | 35.53 | 84.03 | 1.73 | MultipleMeltPeaks            |
| tnpA-03     | 33C | 36.5  | 73.62 | 2.13 |                              |
| tnpA-04     | 33C | 29.62 | 82.24 | 1.93 |                              |
| tnpA-05     | 33C |       |       |      | LowEfficiency, CtIsSmall, Ci |
| tnpA-07     | 33C |       |       |      | LowEfficiency, CtIsSmall, Ci |
| tolC-01     | 33C | 34.26 | 75.25 | 1.92 | MultipleMeltPeaks            |
| tolC-02     | 33C | 29.54 | 87.65 | 1.99 |                              |
| tolC-03     | 33C | 31.13 | 85.99 | 1.96 |                              |
| Tp614       | 33C | 34.71 | 81.74 | 1.97 |                              |
| ttgA        | 33C |       |       |      | LowEfficiency, CtIsSmall, Ci |
| ttgB        | 33C | 33.33 | 84.5  | 2    | MultipleMeltPeaks            |
| vanA        | 33C |       |       |      | LowEfficiency, CtIsSmall, Ci |
| vanB-01     | 33C | 32.85 | 84.24 | 2.07 | MultipleMeltPeaks            |
| vanC-01     | 33C |       |       |      | LowEfficiency, CtIsSmall, Ci |
| vanC-02     | 33C |       |       |      | LowEfficiency, CtIsSmall, Ci |
| vanC-03     | 33C | 25.7  | 86.12 | 2.01 |                              |
| vanC1       | 33C |       |       |      | LowEfficiency, CtIsSmall, Ci |
| vanC2/vanC3 | 33C | 30.38 | 85.22 | 1.83 | MultipleMeltPeaks            |
| vanG        | 33C |       |       |      | LowEfficiency, CtIsSmall, Ci |
| vanHB       | 33C | 37.68 | 79.11 | 1.76 | MultipleMeltPeaks            |
| vanHD       | 33C | 33.59 | 82.7  | 1.88 |                              |
| vanRA-01    | 33C |       |       |      | LowEfficiency, CtIsSmall, Ci |
| vanRA-02    | 33C |       |       |      | LowEfficiency, CtIsSmall, Ci |
| vanRB       | 33C |       |       |      | CurveFitFailed               |
| vanRC       | 33C |       |       |      | LowEfficiency, CtIsSmall, Ci |
| vanRC4      | 33C |       |       |      | LowEfficiency, CtIsSmall, Ci |
| vanRD       | 33C |       |       |      | LowEfficiency, CtIsSmall, Ci |
| vanSA       | 33C |       |       |      | LowEfficiency, CtIsSmall, Ci |
| vanSB       | 33C | 29.8  | 74.17 | 1.99 |                              |
| vanSC-01    | 33C | 35.07 | 83.97 | 2.11 |                              |
| vanSC-02    | 33C |       |       |      | NoAmplification              |
| vanTC-01    | 33C |       |       |      | LowEfficiency, CtIsSmall, Ci |
| vanTC-02    | 33C | 34.63 | 81.27 | 1.76 | MultipleMeltPeaks            |
| vanTE       | 33C |       |       |      | LowEfficiency, CtIsSmall, S: |
| vanTG       | 33C |       |       |      | LowEfficiency, CtIsSmall, Ci |
| vanWB       | 33C |       |       |      | LowEfficiency, CtIsSmall, Ci |
| vanWG       | 33C | 34.7  | 82.92 | 1.94 |                              |
| vanXA       | 33C |       |       |      | LowEfficiency, CtIsSmall, S: |
| vanXB       | 33C |       |       |      | NoAmplification              |
| vanXD       | 33C | 30.72 | 75.35 | 2.05 |                              |

|              |     |       |       |      |                              |
|--------------|-----|-------|-------|------|------------------------------|
| vanYB        | 33C | 34.41 | 84.62 | 1.88 |                              |
| vanYD-01     | 33C | 29.74 | 82.45 | 1.89 | MultipleMeltPeaks            |
| vanYD-02     | 33C | 35.94 | 74.38 | 1.97 |                              |
| vatB-01      | 33C |       |       |      | LowEfficiency, CtIsSmall, Ci |
| vatB-02      | 33C |       |       |      | LowEfficiency, CtIsSmall, S  |
| vatC-01      | 33C | 31.99 | 81.3  | 1.91 |                              |
| vatC-02      | 33C | 36.33 | 87.5  | 1.88 |                              |
| vatE-01      | 33C | 32.6  | 76.25 | 2.05 |                              |
| vatE-02      | 33C |       |       |      | NoAmplification              |
| vgaA-01      | 33C | 33.46 | 84.77 | 1.96 |                              |
| vgaA-02      | 33C |       |       |      | LowEfficiency, CtIsSmall, Ci |
| vgb-01       | 33C | 34.39 | 86.91 | 1.9  |                              |
| vgbB-01      | 33C |       |       |      | LowEfficiency, CtIsSmall, Ci |
| vgbB-02      | 33C |       |       |      | LowEfficiency, CtIsSmall, Ci |
| yceE/mdtG-0  | 33C |       |       |      | LowEfficiency, CtIsSmall, Ci |
| yceE/mdtG-0  | 33C | 34.51 | 77.83 | 2.06 |                              |
| yceL/mdtH-0  | 33C | 30.6  | 82.56 | 1.97 | MultipleMeltPeaks            |
| yceL/mdtH-0  | 33C |       |       |      | LowEfficiency, CtIsSmall, Ci |
| yceL/mdtH-0  | 33C | 35.74 | 81.89 | 1.89 | MultipleMeltPeaks            |
| yidY/mdtL-01 | 33C | 31.46 | 88.4  | 2.07 | MultipleMeltPeaks            |
| yidY/mdtL-02 | 33C | 34.72 | 75.39 | 2.05 |                              |































| Assay          | Sample | Ct | Tm    | Efficiency | flag                         |
|----------------|--------|----|-------|------------|------------------------------|
| 16S rRNA       | 34A    |    | 15.64 | 81.49      | 2.09                         |
| aac            | 34A    |    | 33.01 | 80.93      | 1.96 MultipleMeltPeaks       |
| aac(6')-Ib(akz | 34A    |    |       |            | LowEfficiency, CtIsSmall, Ci |
| aac(6')-Ib(akz | 34A    |    | 34.47 | 86.23      | 1.95 MultipleMeltPeaks       |
| aac(6')-Ib(akz | 34A    |    | 31.44 | 78.79      | 1.96 MultipleMeltPeaks       |
| aac(6')-II     | 34A    |    | 36.83 | 80.72      | 1.88                         |
| aac(6')I1      | 34A    |    |       |            | LowEfficiency, CtIsSmall, Ci |
| aacA/aphD      | 34A    |    |       |            | LowEfficiency, CtIsSmall, S: |
| aacC           | 34A    |    | 27.01 | 88.1       | 1.91 MultipleMeltPeaks       |
| aacC1          | 34A    |    |       |            | CurveFitFailed               |
| aacC2          | 34A    |    |       |            | LowEfficiency, CtIsSmall, Ci |
| aacC4          | 34A    |    | 33.54 | 86.56      | 1.91 MultipleMeltPeaks       |
| aadA-01        | 34A    |    |       |            | CurveFitFailed               |
| aadA-02        | 34A    |    | 32.49 | 82.62      | 1.92                         |
| aadA-1-01      | 34A    |    | 36.61 | 81.29      | 1.94                         |
| aadA-1-02      | 34A    |    |       |            | LowEfficiency, CtIsSmall, S: |
| aadA1          | 34A    |    | 36.11 | 82.82      | 1.98 MultipleMeltPeaks       |
| aadA2-01       | 34A    |    |       |            | LowEfficiency, CtIsSmall, Ci |
| aadA2-02       | 34A    |    | 32.57 | 75.14      | 1.96                         |
| aadA2-03       | 34A    |    | 29.94 | 79.32      | 1.99                         |
| aadA5-01       | 34A    |    |       |            | CurveFitFailed               |
| aadA5-02       | 34A    |    | 32.51 | 87.94      | 2.04 MultipleMeltPeaks       |
| aadA9-01       | 34A    |    | 35.28 | 83.55      | 1.94                         |
| aadA9-02       | 34A    |    |       |            | LowEfficiency, CtIsSmall, S: |
| aadD           | 34A    |    |       |            | LowEfficiency, CtIsSmall, S: |
| aadE           | 34A    |    |       |            | CurveFitFailed               |
| acrA-01        | 34A    |    | 25.71 | 82.76      | 1.93 MultipleMeltPeaks       |
| acrA-02        | 34A    |    |       |            | LowEfficiency, CtIsSmall, S: |
| acrA-03        | 34A    |    |       |            | CurveFitFailed               |
| acrA-04        | 34A    |    | 30.6  | 88.69      | 1.77                         |
| acrA-05        | 34A    |    | 30.97 | 88.7       | 2.01                         |
| acrB-01        | 34A    |    |       |            | CurveFitFailed               |
| acrF           | 34A    |    | 35.18 | 81.67      | 1.91                         |
| acrR-01        | 34A    |    | 30.45 | 79.29      | 1.91                         |
| acrR-02        | 34A    |    | 35.11 | 83.09      | 1.88 MultipleMeltPeaks       |
| Actin          | 34A    |    | 20.46 | 86.92      | 1.97                         |
| adeA           | 34A    |    |       |            | LowEfficiency, CtIsSmall, S: |
| ampC-01        | 34A    |    | 31.75 | 79.49      | 1.58 MultipleMeltPeaks       |
| ampC-02        | 34A    |    |       |            | CurveFitFailed               |
| ampC-04        | 34A    |    | 33.48 | 78.28      | 1.88 MultipleMeltPeaks       |
| ampC-05        | 34A    |    |       |            | LowEfficiency, CtIsSmall, S: |
| ampC-06        | 34A    |    |       |            | CurveFitFailed               |
| ampC-07        | 34A    |    |       |            | LowEfficiency, CtIsSmall, Ci |
| ampC-09        | 34A    |    |       |            | LowEfficiency, CtIsSmall, S: |
| ampC/blaDH     | 34A    |    | 29.64 | 85.35      | 1.99                         |

|                          |     |       |       |      |                              |
|--------------------------|-----|-------|-------|------|------------------------------|
| aph                      | 34A |       |       |      | LowEfficiency, CtIsSmall, S: |
| aph(2')-Id-01            | 34A |       |       |      | LowEfficiency, CtIsSmall, C: |
| aph(2')-Id-02            | 34A |       |       |      | CurveFitFailed               |
| aph6ia                   | 34A |       |       |      | NoAmplification              |
| aphA1(aka k <sub>z</sub> | 34A |       |       |      | LowEfficiency, CtIsSmall, S: |
| bacA-01                  | 34A |       |       |      | CurveFitFailed               |
| bacA-02                  | 34A |       |       |      | CurveFitFailed               |
| BETA-globin              | 34A | 21.38 | 84.03 | 1.99 |                              |
| bla-ACC-1                | 34A |       |       |      | CurveFitFailed               |
| bla-L1                   | 34A | 27.67 | 85.84 | 2.03 |                              |
| bla1                     | 34A |       |       |      | LowEfficiency, CtIsSmall, C: |
| blaCMY                   | 34A |       |       |      | CurveFitFailed               |
| blaCMY2-01               | 34A |       |       |      | CurveFitFailed               |
| blaCMY2-02               | 34A | 29.85 | 83.57 | 2.02 |                              |
| blaCTX-M-01              | 34A |       |       |      | LowEfficiency, CtIsSmall, S: |
| blaCTX-M-02              | 34A |       |       |      | CurveFitFailed               |
| blaCTX-M-03              | 34A |       |       |      | CurveFitFailed               |
| blaCTX-M-04              | 34A | 35.33 | 90.63 | 1.98 | MultipleMeltPeaks            |
| blaCTX-M-05              | 34A |       |       |      | NoAmplification              |
| blaCTX-M-06              | 34A |       |       |      | LowEfficiency, CtIsSmall, S: |
| blaGES                   | 34A |       |       |      | CurveFitFailed               |
| blaIMP-01                | 34A |       |       |      | LowEfficiency, CtIsSmall, C: |
| blaIMP-02                | 34A |       |       |      | CurveFitFailed               |
| blaMOX/blaC              | 34A |       |       |      | LowEfficiency, CtIsSmall, S: |
| blaOCH                   | 34A |       |       |      | NoAmplification              |
| blaOKP                   | 34A |       |       |      | NoAmplification              |
| blaOXA1/blaC             | 34A |       |       |      | CurveFitFailed               |
| blaOXA10-01              | 34A |       |       |      | LowEfficiency, CtIsSmall, C: |
| blaOXA10-02              | 34A |       |       |      | LowEfficiency, CtIsSmall, S: |
| blaOXY                   | 34A |       |       |      | LowEfficiency, CtIsSmall, S: |
| blaPAO                   | 34A |       |       |      | CurveFitFailed               |
| blaPER                   | 34A |       |       |      | LowEfficiency, CtIsSmall, C: |
| blaPSE                   | 34A |       |       |      | LowEfficiency, CtIsSmall, C: |
| blaROB                   | 34A |       |       |      | NoAmplification              |
| blaSFO                   | 34A | 30.5  | 83.02 | 1.89 | MultipleMeltPeaks            |
| blaSHV-01                | 34A |       |       |      | CurveFitFailed               |
| blaSHV-02                | 34A |       |       |      | LowEfficiency, CtIsSmall, S: |
| blaTEM                   | 34A | 36.68 | 83.68 | 1.84 | MultipleMeltPeaks            |
| blaTLA                   | 34A |       |       |      | CurveFitFailed               |
| blaVEB                   | 34A |       |       |      | LowEfficiency, CtIsSmall, C: |
| blaVIM                   | 34A |       |       |      | LowEfficiency, CtIsSmall, C: |
| blaZ                     | 34A |       |       |      | LowEfficiency, CtIsSmall, S: |
| carB                     | 34A |       |       |      | LowEfficiency, CtIsSmall, S: |
| catA1                    | 34A |       |       |      | NoAmplification              |
| catB3                    | 34A | 32.08 | 87.6  | 1.89 |                              |
| catB8                    | 34A | 28.98 | 84.43 | 1.96 | MultipleMeltPeaks            |

|            |     |       |       |      |                              |
|------------|-----|-------|-------|------|------------------------------|
| ceoA       | 34A | 28.87 | 82.3  | 1.96 |                              |
| cepA       | 34A |       |       |      | LowEfficiency, CtIsSmall, S: |
| cfiA       | 34A | 35.39 | 83.38 | 2.02 |                              |
| cfr        | 34A |       |       |      | CurveFitFailed               |
| cfxA       | 34A | 22.86 | 77.45 | 1.98 |                              |
| cmeA       | 34A |       |       |      | CurveFitFailed               |
| cmlA1-01   | 34A |       |       |      | CurveFitFailed               |
| cmlA1-02   | 34A | 36.25 | 89.43 | 1.87 |                              |
| cmr        | 34A |       |       |      | LowEfficiency, CtIsSmall, S: |
| cmx(A)     | 34A | 30.98 | 86.8  | 1.75 | MultipleMeltPeaks            |
| cphA-01    | 34A | 35.93 | 80.19 | 2.01 | MultipleMeltPeaks            |
| cphA-02    | 34A | 30.8  | 82.36 | 1.96 | MultipleMeltPeaks            |
| dfrA1      | 34A |       |       |      | LowEfficiency, CtIsSmall, C: |
| dfrA12     | 34A |       |       |      | LowEfficiency, CtIsSmall, S: |
| emrD       | 34A |       |       |      | LowEfficiency, CtIsSmall, C: |
| ereA       | 34A |       |       |      | CurveFitFailed               |
| ereB       | 34A | 35.52 | 84.61 | 1.98 | MultipleMeltPeaks            |
| erm(34)    | 34A |       |       |      | LowEfficiency, CtIsSmall, C: |
| erm(35)    | 34A |       |       |      | CurveFitFailed               |
| erm(36)    | 34A | 32.8  | 81.99 | 2.19 | MultipleMeltPeaks            |
| ermA       | 34A |       |       |      | CurveFitFailed               |
| ermA/ermTR | 34A |       |       |      | NoAmplification              |
| ermB       | 34A | 24.56 | 74.85 | 2.06 |                              |
| ermC       | 34A |       |       |      | LowEfficiency, CtIsSmall, S: |
| ermF       | 34A |       |       |      | LowEfficiency, CtIsSmall, S: |
| ermJ/ermD  | 34A |       |       |      | LowEfficiency, CtIsSmall, S: |
| ermK-01    | 34A | 31.6  | 75.03 | 2    |                              |
| ermK-02    | 34A |       |       |      | CurveFitFailed               |
| ermT-01    | 34A |       |       |      | CurveFitFailed               |
| ermT-02    | 34A |       |       |      | CurveFitFailed               |
| ermX       | 34A |       |       |      | CurveFitFailed               |
| ermY       | 34A |       |       |      | LowEfficiency, CtIsSmall, S: |
| fabK       | 34A | 23.04 | 77.33 | 2.07 |                              |
| floR       | 34A | 33.97 | 89.73 | 1.79 |                              |
| folA       | 34A |       |       |      | NoAmplification              |
| fosB       | 34A |       |       |      | LowEfficiency, CtIsSmall, S: |
| fosX       | 34A |       |       |      | CurveFitFailed               |
| fox5       | 34A | 29.19 | 86.1  | 1.94 |                              |
| imiR       | 34A |       |       |      | LowEfficiency, CtIsSmall, S: |
| ImrA-01    | 34A |       |       |      | CurveFitFailed               |
| intl       | 34A | 30.75 | 84.5  | 1.93 |                              |
| intl1      | 34A | 20.92 | 87.27 | 2.09 |                              |
| IS613      | 34A | 29.31 | 79.29 | 1.95 |                              |
| lnuA-01    | 34A |       |       |      | LowEfficiency, CtIsSmall, S: |
| lnuB-01    | 34A |       |       |      | CurveFitFailed               |
| lnuB-02    | 34A |       |       |      | CurveFitFailed               |

|                |     |       |       |      |                              |
|----------------|-----|-------|-------|------|------------------------------|
| lnuC           | 34A |       |       |      | CurveFitFailed               |
| marR-01        | 34A | 32.85 | 86.26 | 1.97 |                              |
| matA/mel       | 34A | 21.11 | 77.54 | 2.08 |                              |
| mdet1          | 34A |       |       |      | LowEfficiency, CtIsSmall, Ci |
| mdtA           | 34A |       |       |      | LowEfficiency, CtIsSmall, S: |
| mdtE/yhiU      | 34A | 32.32 | 87.85 | 1.91 |                              |
| mecA           | 34A |       |       |      | CurveFitFailed               |
| mefA           | 34A | 21.42 | 80.4  | 1.55 |                              |
| mepA           | 34A |       |       |      | LowEfficiency, CtIsSmall, Ci |
| mexA           | 34A |       |       |      | CurveFitFailed               |
| mexD           | 34A |       |       |      | NoAmplification              |
| mexE           | 34A | 36.36 | 83.21 | 1.83 | MultipleMeltPeaks            |
| mexF           | 34A |       |       |      | CurveFitFailed               |
| mphA-01        | 34A | 28.91 | 86.73 | 2.04 |                              |
| mphA-02        | 34A | 32.68 | 79.74 | 1.61 | MultipleMeltPeaks            |
| mphB           | 34A |       |       |      | LowEfficiency, CtIsSmall, S: |
| mphC           | 34A |       |       |      | LowEfficiency, CtIsSmall, Ci |
| msrA-01        | 34A |       |       |      | CurveFitFailed               |
| msrC-01        | 34A |       |       |      | NoAmplification              |
| mtrC-01        | 34A |       |       |      | LowEfficiency, CtIsSmall, S: |
| mtrC-02        | 34A | 35.43 | 84.33 | 1.93 |                              |
| mtrD-02        | 34A | 27.83 | 81.43 | 1.96 |                              |
| mtrD-03        | 34A |       |       |      | LowEfficiency, CtIsSmall, S: |
| NDM1           | 34A |       |       |      | LowEfficiency, CtIsSmall, S: |
| nimE           | 34A |       |       |      | CurveFitFailed               |
| nisB           | 34A |       |       |      | CurveFitFailed               |
| oleC           | 34A | 36.56 | 82.2  | 1.89 |                              |
| oprD           | 34A | 29.11 | 86.81 | 2.03 |                              |
| oprJ           | 34A |       |       |      | CurveFitFailed               |
| pbp            | 34A | 32.34 | 85.01 | 1.93 |                              |
| pbp2x          | 34A | 22.82 | 74.95 | 1.87 |                              |
| Pbp5           | 34A |       |       |      | LowEfficiency, CtIsSmall, S: |
| penA           | 34A | 34.25 | 91.61 | 1.86 |                              |
| pikR1          | 34A | 34.2  | 85.39 | 1.63 |                              |
| pikR2          | 34A | 29.44 | 84.96 | 2.07 | MultipleMeltPeaks            |
| pmrA           | 34A | 24.02 | 79.6  | 2.05 |                              |
| pncA           | 34A | 31.81 | 84.25 | 1.89 |                              |
| putative multi | 34A |       |       |      | BadR2, LowEfficiency, CtIsS  |
| qac            | 34A |       |       |      | LowEfficiency, CtIsSmall, S: |
| qacA           | 34A |       |       |      | LowEfficiency, CtIsSmall, Ci |
| qacA/qacB      | 34A |       |       |      | CurveFitFailed               |
| qacEdelta1-0   | 34A |       |       |      | LowEfficiency, CtIsSmall, S: |
| qacEdelta1-0   | 34A | 28.92 | 78.54 | 1.98 |                              |
| qacH-01        | 34A | 34.22 | 81.11 | 1.95 | MultipleMeltPeaks            |
| qacH-02        | 34A | 34.18 | 83.93 | 1.67 |                              |
| qnrA           | 34A | 34.95 | 80.87 | 1.85 |                              |



|              |     |       |       |      |                             |
|--------------|-----|-------|-------|------|-----------------------------|
| rarD-02      | 34A | 36.35 | 85.88 | 1.9  |                             |
| sat4         | 34A |       |       |      | LowEfficiency, CtIsSmall, S |
| sdeB         | 34A |       |       |      | LowEfficiency, CtIsSmall, S |
| spcN-01      | 34A |       |       |      | LowEfficiency, CtIsSmall, S |
| speA         | 34A |       |       |      | LowEfficiency, CtIsSmall, C |
| str          | 34A |       |       |      | LowEfficiency, CtIsSmall, C |
| strA         | 34A |       |       |      | CurveFitFailed              |
| strB         | 34A |       |       |      | NoAmplification             |
| sul1         | 34A |       |       |      | NoAmplification             |
| sul2         | 34A |       |       |      | LowEfficiency, CtIsSmall, S |
| sulA/foIP-01 | 34A | 22.7  | 81.22 | 2.03 |                             |
| sulA/foIP-03 | 34A | 21.49 | 83.6  | 2.01 |                             |
| tet(32)      | 34A |       |       |      | CurveFitFailed              |
| tet(34)      | 34A | 34.63 | 74.83 | 2.01 |                             |
| tet(35)      | 34A | 36.42 | 80.92 | 1.98 |                             |
| tet(36)-A    | 34A |       |       |      | CurveFitFailed              |
| tet(36)-B    | 34A |       |       |      | CurveFitFailed              |
| tet(37)      | 34A | 33.34 | 81.58 | 1.92 | MultipleMeltPeaks           |
| tetA-01      | 34A |       |       |      | NoAmplification             |
| tetA-02      | 34A |       |       |      | LowEfficiency, CtIsSmall, S |
| tetB-01      | 34A | 28.44 | 79.25 | 1.85 |                             |
| tetB-02      | 34A | 29.5  | 79.51 | 1.98 |                             |
| tetC-01      | 34A | 28.49 | 74.45 | 1.36 |                             |
| tetC-02      | 34A | 28.61 | 75.99 | 2.06 |                             |
| tetD-01      | 34A |       |       |      | LowEfficiency, CtIsSmall, C |
| tetD-02      | 34A | 37.3  | 75.94 | 1.93 |                             |
| tetE         | 34A |       |       |      | LowEfficiency, CtIsSmall, S |
| tetG-01      | 34A | 34.12 | 88.69 | 2.04 |                             |
| tetG-02      | 34A | 34.52 | 87.07 | 1.95 |                             |
| tetH         | 34A |       |       |      | CurveFitFailed              |
| tetJ         | 34A | 35.33 | 83.47 | 1.93 |                             |
| tetK         | 34A |       |       |      | LowEfficiency, CtIsSmall, S |
| tetL-01      | 34A |       |       |      | LowEfficiency, CtIsSmall, C |
| tetL-02      | 34A | 36    | 85.8  | 1.86 |                             |
| tetM-01      | 34A | 22.17 | 76.04 | 2.01 |                             |
| tetM-02      | 34A | 21.69 | 77.69 | 2.07 |                             |
| tetO-01      | 34A | 26.83 | 76.65 | 2.02 |                             |
| tetPA        | 34A |       |       |      | CurveFitFailed              |
| tetPB-01     | 34A |       |       |      | LowEfficiency, CtIsSmall, C |
| tetPB-02     | 34A | 28.5  | 84.78 | 1.95 |                             |
| tetPB-03     | 34A |       |       |      | LowEfficiency, CtIsSmall, S |
| tetPB-05     | 34A |       |       |      | LowEfficiency, CtIsSmall, S |
| tetQ         | 34A | 23.97 | 77.19 | 2.11 |                             |
| tetR-02      | 34A | 33.2  | 81.7  | 1.88 | MultipleMeltPeaks           |
| tetR-03      | 34A | 28.38 | 76    | 1.97 |                             |
| tetS         | 34A |       |       |      | CurveFitFailed              |

|             |     |       |       |      |                              |
|-------------|-----|-------|-------|------|------------------------------|
| tetT        | 34A |       |       |      | LowEfficiency, CtIsSmall, Ci |
| tetU-01     | 34A |       |       |      | LowEfficiency, CtIsSmall, Ci |
| tetV        | 34A |       |       |      | CurveFitFailed               |
| tetW-01     | 34A |       |       |      | LowEfficiency, CtIsSmall, S: |
| tetX        | 34A |       |       |      | LowEfficiency, CtIsSmall, Ci |
| tnpA-01     | 34A | 35.07 | 76.96 | 1.96 |                              |
| tnpA-02     | 34A |       |       |      | CurveFitFailed               |
| tnpA-03     | 34A | 30.1  | 77.46 | 1.47 |                              |
| tnpA-04     | 34A |       |       |      | LowEfficiency, CtIsSmall, Ci |
| tnpA-05     | 34A |       |       |      | NoAmplification              |
| tnpA-07     | 34A |       |       |      | LowEfficiency, CtIsSmall, S: |
| tolC-01     | 34A |       |       |      | CurveFitFailed               |
| tolC-02     | 34A | 30.17 | 87.7  | 1.99 |                              |
| tolC-03     | 34A | 33.65 | 85.83 | 1.97 |                              |
| Tp614       | 34A |       |       |      | CurveFitFailed               |
| ttgA        | 34A |       |       |      | LowEfficiency, CtIsSmall, S: |
| ttgB        | 34A |       |       |      | CurveFitFailed               |
| vanA        | 34A |       |       |      | LowEfficiency, CtIsSmall, Ci |
| vanB-01     | 34A | 35.79 | 80.85 | 1.74 |                              |
| vanC-01     | 34A |       |       |      | LowEfficiency, CtIsSmall, S: |
| vanC-02     | 34A |       |       |      | LowEfficiency, CtIsSmall, Ci |
| vanC-03     | 34A | 26.35 | 85.09 | 1.98 | MultipleMeltPeaks            |
| vanC1       | 34A |       |       |      | NoAmplification              |
| vanC2/vanC3 | 34A | 33.07 | 84.73 | 2    | MultipleMeltPeaks            |
| vanG        | 34A |       |       |      | LowEfficiency, CtIsSmall, Ci |
| vanHB       | 34A | 30.84 | 90.63 | 1.97 |                              |
| vanHD       | 34A |       |       |      | CurveFitFailed               |
| vanRA-01    | 34A |       |       |      | LowEfficiency, CtIsSmall, S: |
| vanRA-02    | 34A |       |       |      | CurveFitFailed               |
| vanRB       | 34A | 37.15 | 87.57 | 1.76 | MultipleMeltPeaks            |
| vanRC       | 34A |       |       |      | LowEfficiency, CtIsSmall, Ci |
| vanRC4      | 34A |       |       |      | LowEfficiency, CtIsSmall, S: |
| vanRD       | 34A |       |       |      | LowEfficiency, CtIsSmall, Ci |
| vanSA       | 34A |       |       |      | LowEfficiency, CtIsSmall, S: |
| vanSB       | 34A | 29.95 | 74.21 | 2    |                              |
| vanSC-01    | 34A |       |       |      | CurveFitFailed               |
| vanSC-02    | 34A |       |       |      | NoAmplification              |
| vanTC-01    | 34A |       |       |      | CurveFitFailed               |
| vanTC-02    | 34A | 33.88 | 86.68 | 1.97 |                              |
| vanTE       | 34A |       |       |      | CurveFitFailed               |
| vanTG       | 34A |       |       |      | LowEfficiency, CtIsSmall, Ci |
| vanWB       | 34A |       |       |      | LowEfficiency, CtIsSmall, S: |
| vanWG       | 34A |       |       |      | LowEfficiency, CtIsSmall, S: |
| vanXA       | 34A |       |       |      | CurveFitFailed               |
| vanXB       | 34A |       |       |      | LowEfficiency, CtIsSmall, Ci |
| vanXD       | 34A | 31.53 | 75.15 | 2.01 |                              |

|              |     |       |       |      |                              |
|--------------|-----|-------|-------|------|------------------------------|
| vanYB        | 34A |       |       |      | CurveFitFailed               |
| vanYD-01     | 34A | 31.81 | 82.66 | 1.83 |                              |
| vanYD-02     | 34A |       |       |      | LowEfficiency, CtIsSmall, S: |
| vatB-01      | 34A |       |       |      | LowEfficiency, CtIsSmall, C: |
| vatB-02      | 34A | 32.57 | 82.08 | 2.06 |                              |
| vatC-01      | 34A | 35.97 | 80.9  | 1.83 |                              |
| vatC-02      | 34A |       |       |      | LowEfficiency, CtIsSmall, S: |
| vatE-01      | 34A | 29.28 | 75.25 | 2.16 |                              |
| vatE-02      | 34A |       |       |      | CurveFitFailed               |
| vgaA-01      | 34A |       |       |      | CurveFitFailed               |
| vgaA-02      | 34A |       |       |      | LowEfficiency, CtIsSmall, S: |
| vgb-01       | 34A |       |       |      | LowEfficiency, CtIsSmall, S: |
| vgbB-01      | 34A |       |       |      | CurveFitFailed               |
| vgbB-02      | 34A |       |       |      | CurveFitFailed               |
| yceE/mdtG-0  | 34A |       |       |      | CurveFitFailed               |
| yceE/mdtG-0  | 34A |       |       |      | BadR2, LowEfficiency, CtIsS  |
| yceL/mdtH-0  | 34A | 32.7  | 84.39 | 2.01 |                              |
| yceL/mdtH-0  | 34A |       |       |      | NoAmplification              |
| yceL/mdtH-0  | 34A | 35.27 | 81.55 | 1.93 |                              |
| yidY/mdtL-01 | 34A | 34.49 | 86.03 | 1.88 | MultipleMeltPeaks            |
| yidY/mdtL-02 | 34A |       |       |      | CurveFitFailed               |































| Assay           | Sample | Ct | Tm    | Efficiency | flag                         |
|-----------------|--------|----|-------|------------|------------------------------|
| 16S rRNA        | 34B    |    | 14.51 | 82.15      | 2.01                         |
| aac             | 34B    |    | 33.64 | 88.32      | 1.93                         |
| aac(6')-Ib(akz) | 34B    |    | 39.02 | 62.22      | 2.05 MultipleMeltPeaks       |
| aac(6')-Ib(akz) | 34B    |    | 35.93 | 78.86      | 1.82 MultipleMeltPeaks       |
| aac(6')-Ib(akz) | 34B    |    | 35.83 | 79.02      | 1.85                         |
| aac(6')-II      | 34B    |    | 34.98 | 88.42      | 1.82 MultipleMeltPeaks       |
| aac(6')I1       | 34B    |    | 36.04 | 87.37      | 1.8                          |
| aacA/aphD       | 34B    |    |       |            | LowEfficiency, CtIsSmall, S: |
| aacC            | 34B    |    | 31.06 | 87.75      | 1.88                         |
| aacC1           | 34B    |    |       |            | CurveFitFailed               |
| aacC2           | 34B    |    |       |            | NoAmplification              |
| aacC4           | 34B    |    | 34.93 | 89.53      | 1.84                         |
| aadA-01         | 34B    |    |       |            | CurveFitFailed               |
| aadA-02         | 34B    |    |       |            | NoAmplification              |
| aadA-1-01       | 34B    |    |       |            | NoAmplification              |
| aadA-1-02       | 34B    |    |       |            | CurveFitFailed               |
| aadA1           | 34B    |    |       |            | NoAmplification              |
| aadA2-01        | 34B    |    |       |            | NoAmplification              |
| aadA2-02        | 34B    |    | 35.54 | 74.29      | 1.69 MultipleMeltPeaks       |
| aadA2-03        | 34B    |    | 29.79 | 80.41      | 1.99                         |
| aadA5-01        | 34B    |    |       |            | LowEfficiency, CtIsSmall, S: |
| aadA5-02        | 34B    |    | 32.51 | 78.42      | 1.97                         |
| aadA9-01        | 34B    |    |       |            | CurveFitFailed               |
| aadA9-02        | 34B    |    | 34.68 | 89.88      | 1.9                          |
| aadD            | 34B    |    |       |            | NoAmplification              |
| aadE            | 34B    |    |       |            | NoAmplification              |
| acrA-01         | 34B    |    | 22.93 | 83.17      | 1.95                         |
| acrA-02         | 34B    |    | 37.96 | 75.42      | 1.91 MultipleMeltPeaks       |
| acrA-03         | 34B    |    |       |            | CurveFitFailed               |
| acrA-04         | 34B    |    | 38.44 | 61.87      | 1.84 MultipleMeltPeaks       |
| acrA-05         | 34B    |    | 35.08 | 83.9       | 1.85 MultipleMeltPeaks       |
| acrB-01         | 34B    |    |       |            | NoAmplification              |
| acrF            | 34B    |    | 38.98 | 78.07      | 1.77                         |
| acrR-01         | 34B    |    | 36.86 | 61.52      | 2.19 MultipleMeltPeaks       |
| acrR-02         | 34B    |    | 37.5  | 76.77      | 1.82                         |
| Actin           | 34B    |    | 24.48 | 87.05      | 1.91                         |
| adeA            | 34B    |    | 32.97 | 79.3       | 1.91                         |
| ampC-01         | 34B    |    | 30.11 | 81.1       | 2                            |
| ampC-02         | 34B    |    | 37.73 | 85.49      | 2 MultipleMeltPeaks          |
| ampC-04         | 34B    |    | 39.26 | 86.76      | 1.74 MultipleMeltPeaks       |
| ampC-05         | 34B    |    |       |            | NoAmplification              |
| ampC-06         | 34B    |    | 28.97 | 84.65      | 1.95                         |
| ampC-07         | 34B    |    |       |            | NoAmplification              |
| ampC-09         | 34B    |    |       |            | NoAmplification              |
| ampC/blaDH      | 34B    |    | 31.78 | 84.44      | 1.9 MultipleMeltPeaks        |

|               |     |       |       |      |                             |
|---------------|-----|-------|-------|------|-----------------------------|
| aph           | 34B |       |       |      | LowEfficiency, CtIsSmall, S |
| aph(2')-Id-01 | 34B |       |       |      | LowEfficiency, CtIsSmall, C |
| aph(2')-Id-02 | 34B |       |       |      | NoAmplification             |
| aph6ia        | 34B |       |       |      | NoAmplification             |
| aphA1(aka k   | 34B | 29.01 | 76.82 | 2.05 |                             |
| bacA-01       | 34B |       |       |      | NoAmplification             |
| bacA-02       | 34B | 41.52 | 89.29 | 1.64 | MultipleMeltPeaks           |
| BETA-globin   | 34B | 25.78 | 84.11 | 1.97 |                             |
| bla-ACC-1     | 34B |       |       |      | NoAmplification             |
| bla-L1        | 34B | 31.37 | 86.06 | 1.95 |                             |
| bla1          | 34B |       |       |      | LowEfficiency, CtIsSmall, S |
| blaCMY        | 34B | 36.36 | 79.84 | 1.9  |                             |
| blaCMY2-01    | 34B |       |       |      | NoAmplification             |
| blaCMY2-02    | 34B | 31.58 | 92.29 | 1.96 |                             |
| blaCTX-M-01   | 34B | 34.01 | 86.55 | 1.97 | MultipleMeltPeaks           |
| blaCTX-M-02   | 34B | 39.37 | 63.52 | 1.63 | MultipleMeltPeaks           |
| blaCTX-M-03   | 34B |       |       |      | LowEfficiency, CtIsSmall, S |
| blaCTX-M-04   | 34B | 41.05 | 62.58 | 1.67 | MultipleMeltPeaks           |
| blaCTX-M-05   | 34B | 32.79 | 76.78 | 1.82 |                             |
| blaCTX-M-06   | 34B |       |       |      | NoAmplification             |
| blaGES        | 34B |       |       |      | NoAmplification             |
| blaIMP-01     | 34B |       |       |      | NoAmplification             |
| blaIMP-02     | 34B |       |       |      | LowEfficiency, CtIsSmall, C |
| blaMOX/blaC   | 34B |       |       |      | NoAmplification             |
| blaOCH        | 34B |       |       |      | NoAmplification             |
| blaOKP        | 34B |       |       |      | NoAmplification             |
| blaOXA1/blaC  | 34B |       |       |      | CurveFitFailed              |
| blaOXA10-01   | 34B |       |       |      | CurveFitFailed              |
| blaOXA10-02   | 34B |       |       |      | CurveFitFailed              |
| blaOXY        | 34B | 36.51 | 88.76 | 1.63 |                             |
| blaPAO        | 34B |       |       |      | NoAmplification             |
| blaPER        | 34B |       |       |      | LowEfficiency, CtIsSmall, C |
| blaPSE        | 34B |       |       |      | NoAmplification             |
| blaROB        | 34B |       |       |      | NoAmplification             |
| blaSFO        | 34B | 29.79 | 86.11 | 1.93 |                             |
| blaSHV-01     | 34B |       |       |      | CurveFitFailed              |
| blaSHV-02     | 34B |       |       |      | CurveFitFailed              |
| blaTEM        | 34B | 28.47 | 79.48 | 1.93 |                             |
| blaTLA        | 34B |       |       |      | LowEfficiency, CtIsSmall, C |
| blaVEB        | 34B |       |       |      | NoAmplification             |
| blaVIM        | 34B |       |       |      | NoAmplification             |
| blaZ          | 34B |       |       |      | NoAmplification             |
| carB          | 34B | 37.17 | 89.77 | 1.79 |                             |
| catA1         | 34B |       |       |      | NoAmplification             |
| catB3         | 34B |       |       |      | NoAmplification             |
| catB8         | 34B | 35.52 | 80.55 | 1.89 |                             |

|            |     |       |       |      |                              |
|------------|-----|-------|-------|------|------------------------------|
| ceoA       | 34B | 30.47 | 82.27 | 1.94 | MultipleMeltPeaks            |
| cepA       | 34B |       |       |      | NoAmplification              |
| cfiA       | 34B |       |       |      | NoAmplification              |
| cfr        | 34B |       |       |      | LowEfficiency, CtIsSmall, Ct |
| cfxA       | 34B | 19.59 | 77.6  | 1.99 |                              |
| cmeA       | 34B |       |       |      | LowEfficiency, CtIsSmall, Ct |
| cmlA1-01   | 34B | 37.13 | 61.77 | 1.85 | MultipleMeltPeaks            |
| cmlA1-02   | 34B | 32.55 | 88.49 | 1.91 |                              |
| cmr        | 34B |       |       |      | CurveFitFailed               |
| cmx(A)     | 34B | 33.09 | 86.9  | 1.95 |                              |
| cphA-01    | 34B |       |       |      | NoAmplification              |
| cphA-02    | 34B | 37.38 | 81.22 | 1.79 |                              |
| dfrA1      | 34B |       |       |      | NoAmplification              |
| dfrA12     | 34B |       |       |      | NoAmplification              |
| emrD       | 34B | 36.17 | 88.52 | 1.74 |                              |
| ereA       | 34B | 37.11 | 82.59 | 1.85 |                              |
| ereB       | 34B | 34.7  | 82.08 | 1.8  | MultipleMeltPeaks            |
| erm(34)    | 34B |       |       |      | NoAmplification              |
| erm(35)    | 34B |       |       |      | LowEfficiency, CtIsSmall, Ct |
| erm(36)    | 34B | 31.63 | 85.93 | 2.04 |                              |
| ermA       | 34B |       |       |      | LowEfficiency, CtIsSmall, Ct |
| ermA/ermTR | 34B |       |       |      | NoAmplification              |
| ermB       | 34B | 26.1  | 75.07 | 2.1  |                              |
| ermC       | 34B |       |       |      | LowEfficiency, CtIsSmall, Ct |
| ermF       | 34B |       |       |      | CurveFitFailed               |
| ermJ/ermD  | 34B |       |       |      | NoAmplification              |
| ermK-01    | 34B |       |       |      | CurveFitFailed               |
| ermK-02    | 34B |       |       |      | NoAmplification              |
| ermT-01    | 34B |       |       |      | BadR2, LowEfficiency, CtIsS  |
| ermT-02    | 34B |       |       |      | CurveFitFailed               |
| ermX       | 34B |       |       |      | NoAmplification              |
| ermY       | 34B |       |       |      | NoAmplification              |
| fabK       | 34B | 25.49 | 78.81 | 2.1  |                              |
| floR       | 34B | 37.19 | 89.25 | 1.69 | MultipleMeltPeaks            |
| folA       | 34B |       |       |      | NoAmplification              |
| fosB       | 34B |       |       |      | LowEfficiency, CtIsSmall, S: |
| fosX       | 34B |       |       |      | NoAmplification              |
| fox5       | 34B | 34.44 | 85.9  | 1.93 |                              |
| imiR       | 34B |       |       |      | NoAmplification              |
| ImrA-01    | 34B |       |       |      | NoAmplification              |
| intl       | 34B | 33.73 | 87.86 | 1.89 |                              |
| intl1      | 34B | 22.94 | 87.62 | 1.99 |                              |
| IS613      | 34B | 27.77 | 79.5  | 2.04 |                              |
| lnuA-01    | 34B |       |       |      | LowEfficiency, CtIsSmall, S: |
| lnuB-01    | 34B |       |       |      | CurveFitFailed               |
| lnuB-02    | 34B |       |       |      | CurveFitFailed               |

|               |     |       |       |      |                              |
|---------------|-----|-------|-------|------|------------------------------|
| lnuC          | 34B |       |       |      | CurveFitFailed               |
| marR-01       | 34B | 30.49 | 86.76 | 1.92 |                              |
| matA/mel      | 34B | 17.81 | 77.75 | 2.07 |                              |
| mdet1         | 34B |       |       |      | NoAmplification              |
| mdtA          | 34B |       |       |      | CurveFitFailed               |
| mdtE/yhiU     | 34B | 29.19 | 87.91 | 1.92 |                              |
| mecA          | 34B |       |       |      | NoAmplification              |
| mefA          | 34B | 17.37 | 80.54 | 1.98 |                              |
| mepA          | 34B | 34.34 | 90.76 | 1.89 |                              |
| mexA          | 34B |       |       |      | LowEfficiency, CtIsSmall, Ci |
| mexD          | 34B | 38.34 | 79.68 | 1.98 | MultipleMeltPeaks            |
| mexE          | 34B |       |       |      | CurveFitFailed               |
| mexF          | 34B | 30.34 | 85.76 | 1.47 |                              |
| mphA-01       | 34B | 32.31 | 89.56 | 1.95 |                              |
| mphA-02       | 34B | 30.02 | 87.99 | 1.99 |                              |
| mphB          | 34B |       |       |      | LowEfficiency, CtIsSmall, S: |
| mphC          | 34B | 38.23 | 61.98 | 1.96 | MultipleMeltPeaks            |
| msrA-01       | 34B |       |       |      | LowEfficiency, CtIsSmall, S: |
| msrC-01       | 34B |       |       |      | NoAmplification              |
| mtrC-01       | 34B | 33.4  | 82.87 | 1.95 |                              |
| mtrC-02       | 34B |       |       |      | NoAmplification              |
| mtrD-02       | 34B | 30.28 | 81.41 | 1.99 |                              |
| mtrD-03       | 34B |       |       |      | CurveFitFailed               |
| NDM1          | 34B |       |       |      | NoAmplification              |
| nimE          | 34B |       |       |      | NoAmplification              |
| nisB          | 34B |       |       |      | CurveFitFailed               |
| oleC          | 34B | 38.64 | 87.08 | 1.73 |                              |
| oprD          | 34B | 30.24 | 82    | 1.96 | MultipleMeltPeaks            |
| oprJ          | 34B | 38.71 | 62.29 | 1.8  | MultipleMeltPeaks            |
| pbp           | 34B |       |       |      | LowEfficiency, CtIsSmall, Ci |
| pbp2x         | 34B |       |       |      | NoAmplification              |
| Pbp5          | 34B |       |       |      | CurveFitFailed               |
| penA          | 34B | 34.02 | 91.77 | 1.8  |                              |
| pikR1         | 34B | 38.71 | 83.52 | 1.82 | MultipleMeltPeaks            |
| pikR2         | 34B | 32.68 | 91.85 | 1.98 |                              |
| pmrA          | 34B | 22.33 | 79.18 | 2.07 |                              |
| pncA          | 34B | 27.46 | 84.19 | 1.89 | MultipleMeltPeaks            |
| putative mul1 | 34B |       |       |      | NoAmplification              |
| qac           | 34B |       |       |      | LowEfficiency, CtIsSmall, S: |
| qacA          | 34B |       |       |      | NoAmplification              |
| qacA/qacB     | 34B |       |       |      | NoAmplification              |
| qacEdelta1-0  | 34B |       |       |      | LowEfficiency, CtIsSmall, Ci |
| qacEdelta1-0  | 34B | 33.3  | 80.26 | 1.98 | MultipleMeltPeaks            |
| qacH-01       | 34B |       |       |      | CurveFitFailed               |
| qacH-02       | 34B |       |       |      | NoAmplification              |
| qnrA          | 34B | 30.58 | 81.17 | 2.02 |                              |

|              |     |       |       |      |                              |
|--------------|-----|-------|-------|------|------------------------------|
| rarD-02      | 34B |       |       |      | NoAmplification              |
| sat4         | 34B |       |       |      | NoAmplification              |
| sdeB         | 34B |       |       |      | CurveFitFailed               |
| spcN-01      | 34B |       |       |      | NoAmplification              |
| speA         | 34B |       |       |      | NoAmplification              |
| str          | 34B |       |       |      | BadR2, LowEfficiency, CtIsS  |
| strA         | 34B |       |       |      | LowEfficiency, CtIsSmall, Ci |
| strB         | 34B | 36.56 | 83.57 | 1.69 |                              |
| sul1         | 34B |       |       |      | NoAmplification              |
| sul2         | 34B |       |       |      | CurveFitFailed               |
| sulA/foIP-01 | 34B | 21.23 | 81.34 | 1.99 |                              |
| sulA/foIP-03 | 34B | 21.29 | 84.01 | 1.98 |                              |
| tet(32)      | 34B |       |       |      | NoAmplification              |
| tet(34)      | 34B | 32.65 | 75.66 | 2    |                              |
| tet(35)      | 34B |       |       |      | NoAmplification              |
| tet(36)-A    | 34B |       |       |      | NoAmplification              |
| tet(36)-B    | 34B |       |       |      | LowEfficiency, CtIsSmall, Ci |
| tet(37)      | 34B | 41.2  | 61.79 | 1.72 | MultipleMeltPeaks            |
| tetA-01      | 34B |       |       |      | NoAmplification              |
| tetA-02      | 34B | 36.09 | 83.87 | 1.85 |                              |
| tetB-01      | 34B | 24.71 | 79.89 | 1.96 |                              |
| tetB-02      | 34B | 23.78 | 79.82 | 2    |                              |
| tetC-01      | 34B | 24.36 | 75.33 | 1.97 |                              |
| tetC-02      | 34B | 24.03 | 76.24 | 2.03 |                              |
| tetD-01      | 34B |       |       |      | LowEfficiency, CtIsSmall, Ci |
| tetD-02      | 34B |       |       |      | NoAmplification              |
| tetE         | 34B |       |       |      | NoAmplification              |
| tetG-01      | 34B | 38.87 | 62.34 | 1.78 | MultipleMeltPeaks            |
| tetG-02      | 34B | 32.22 | 87.59 | 1.95 | MultipleMeltPeaks            |
| tetH         | 34B |       |       |      | NoAmplification              |
| tetJ         | 34B |       |       |      | NoAmplification              |
| tetK         | 34B |       |       |      | LowEfficiency, CtIsSmall, Ci |
| tetL-01      | 34B |       |       |      | NoAmplification              |
| tetL-02      | 34B | 33    | 86.83 | 1.93 |                              |
| tetM-01      | 34B | 19.04 | 76.25 | 2.01 |                              |
| tetM-02      | 34B | 19.09 | 77.72 | 2.03 |                              |
| tetO-01      | 34B | 23.04 | 76.84 | 2.03 |                              |
| tetPA        | 34B |       |       |      | NoAmplification              |
| tetPB-01     | 34B | 38.94 | 62.19 | 1.81 | MultipleMeltPeaks            |
| tetPB-02     | 34B | 36.24 | 85.2  | 1.85 |                              |
| tetPB-03     | 34B |       |       |      | LowEfficiency, CtIsSmall, Ci |
| tetPB-05     | 34B |       |       |      | LowEfficiency, CtIsSmall, Ci |
| tetQ         | 34B | 25.23 | 77.16 | 2.02 |                              |
| tetR-02      | 34B | 31.67 | 90.28 | 1.84 |                              |
| tetR-03      | 34B | 24.72 | 76.34 | 1.98 |                              |
| tetS         | 34B | 38.93 | 87.52 | 1.76 | MultipleMeltPeaks            |

|             |     |       |       |      |                              |
|-------------|-----|-------|-------|------|------------------------------|
| tetT        | 34B |       |       |      | NoAmplification              |
| tetU-01     | 34B |       |       |      | CurveFitFailed               |
| tetV        | 34B |       |       |      | NoAmplification              |
| tetW-01     | 34B |       |       |      | CurveFitFailed               |
| tetX        | 34B |       |       |      | NoAmplification              |
| tnpA-01     | 34B |       |       |      | CurveFitFailed               |
| tnpA-02     | 34B | 38.24 | 83.49 | 1.74 |                              |
| tnpA-03     | 34B | 32.21 | 75.21 | 2.11 |                              |
| tnpA-04     | 34B | 38.01 | 61.88 | 1.89 | MultipleMeltPeaks            |
| tnpA-05     | 34B | 27.33 | 80.87 | 1.92 |                              |
| tnpA-07     | 34B |       |       |      | NoAmplification              |
| tolC-01     | 34B |       |       |      | LowEfficiency, CtIsSmall, Ct |
| tolC-02     | 34B | 29.25 | 84.87 | 1.92 |                              |
| tolC-03     | 34B | 33.59 | 88.24 | 1.88 |                              |
| Tp614       | 34B |       |       |      | CurveFitFailed               |
| ttgA        | 34B |       |       |      | CurveFitFailed               |
| ttgB        | 34B |       |       |      | CurveFitFailed               |
| vanA        | 34B |       |       |      | NoAmplification              |
| vanB-01     | 34B | 32.28 | 81.81 | 1.95 |                              |
| vanC-01     | 34B | 35.22 | 76.75 | 1.98 |                              |
| vanC-02     | 34B |       |       |      | CurveFitFailed               |
| vanC-03     | 34B | 27.55 | 78.29 | 1.95 | MultipleMeltPeaks            |
| vanC1       | 34B |       |       |      | NoAmplification              |
| vanC2/vanC3 | 34B | 38.88 | 83.95 | 1.71 | MultipleMeltPeaks            |
| vanG        | 34B |       |       |      | NoAmplification              |
| vanHB       | 34B | 34.17 | 85.82 | 1.91 |                              |
| vanHD       | 34B |       |       |      | CurveFitFailed               |
| vanRA-01    | 34B |       |       |      | LowEfficiency, CtIsSmall, S: |
| vanRA-02    | 34B |       |       |      | NoAmplification              |
| vanRB       | 34B |       |       |      | NoAmplification              |
| vanRC       | 34B |       |       |      | NoAmplification              |
| vanRC4      | 34B |       |       |      | LowEfficiency, CtIsSmall, Ct |
| vanRD       | 34B |       |       |      | NoAmplification              |
| vanSA       | 34B |       |       |      | NoAmplification              |
| vanSB       | 34B | 30.27 | 74.2  | 1.96 |                              |
| vanSC-01    | 34B |       |       |      | CurveFitFailed               |
| vanSC-02    | 34B |       |       |      | NoAmplification              |
| vanTC-01    | 34B |       |       |      | LowEfficiency, CtIsSmall, Ct |
| vanTC-02    | 34B | 34.46 | 88.28 | 1.85 | MultipleMeltPeaks            |
| vanTE       | 34B |       |       |      | CurveFitFailed               |
| vanTG       | 34B | 38.12 | 73.12 | 1.9  |                              |
| vanWB       | 34B |       |       |      | NoAmplification              |
| vanWG       | 34B | 35.73 | 74.21 | 1.93 |                              |
| vanXA       | 34B |       |       |      | NoAmplification              |
| vanXB       | 34B |       |       |      | NoAmplification              |
| vanXD       | 34B | 31.08 | 75.46 | 2.04 |                              |

|              |     |       |       |      |                              |
|--------------|-----|-------|-------|------|------------------------------|
| vanYB        | 34B | 35.74 | 73.89 | 1.91 |                              |
| vanYD-01     | 34B | 31.39 | 88.72 | 1.89 |                              |
| vanYD-02     | 34B |       |       |      | NoAmplification              |
| vatB-01      | 34B |       |       |      | NoAmplification              |
| vatB-02      | 34B |       |       |      | CurveFitFailed               |
| vatC-01      | 34B |       |       |      | LowEfficiency, CtIsSmall, S: |
| vatC-02      | 34B |       |       |      | CurveFitFailed               |
| vatE-01      | 34B | 30.17 | 75.63 | 2.09 |                              |
| vatE-02      | 34B |       |       |      | NoAmplification              |
| vgaA-01      | 34B |       |       |      | NoAmplification              |
| vgaA-02      | 34B |       |       |      | CurveFitFailed               |
| vgb-01       | 34B | 40.89 | 88.07 | 1.76 | MultipleMeltPeaks            |
| vgbB-01      | 34B |       |       |      | NoAmplification              |
| vgbB-02      | 34B |       |       |      | NoAmplification              |
| yceE/mdtG-0  | 34B |       |       |      | LowEfficiency, CtIsSmall, Ci |
| yceE/mdtG-0  | 34B |       |       |      | NoAmplification              |
| yceL/mdtH-0  | 34B | 33.11 | 84.74 | 1.92 |                              |
| yceL/mdtH-0  | 34B |       |       |      | NoAmplification              |
| yceL/mdtH-0  | 34B | 37.22 | 89.26 | 1.76 |                              |
| yidY/mdtL-01 | 34B |       |       |      | CurveFitFailed               |
| yidY/mdtL-02 | 34B |       |       |      | CurveFitFailed               |































| Assay           | Sample | Ct | Tm    | Efficiency | flag                         |
|-----------------|--------|----|-------|------------|------------------------------|
| 16S rRNA        | 34C    |    | 14.57 | 82.01      | 2.05                         |
| aac             | 34C    |    | 29.25 | 88.6       | 1.77                         |
| aac(6')-Ib(akz) | 34C    |    | 37.9  | 82.23      | 1.85 MultipleMeltPeaks       |
| aac(6')-Ib(akz) | 34C    |    | 30.22 | 88.67      | 1.96 MultipleMeltPeaks       |
| aac(6')-Ib(akz) | 34C    |    | 32.7  | 78.56      | 2.03 MultipleMeltPeaks       |
| aac(6')-II      | 34C    |    | 33.98 | 88.81      | 1.79                         |
| aac(6')I1       | 34C    |    | 32.44 | 90.42      | 1.98                         |
| aacA/aphD       | 34C    |    |       |            | LowEfficiency, CtIsSmall, S: |
| aacC            | 34C    |    | 27.85 | 89.56      | 1.92                         |
| aacC1           | 34C    |    |       |            | CurveFitFailed               |
| aacC2           | 34C    |    |       |            | NoAmplification              |
| aacC4           | 34C    |    | 32.85 | 87.35      | 1.91                         |
| aadA-01         | 34C    |    |       |            | CurveFitFailed               |
| aadA-02         | 34C    |    |       |            | CurveFitFailed               |
| aadA-1-01       | 34C    |    |       |            | NoAmplification              |
| aadA-1-02       | 34C    |    |       |            | CurveFitFailed               |
| aadA1           | 34C    |    | 33.97 | 83.49      | 1.99                         |
| aadA2-01        | 34C    |    | 39.15 | 67.87      | 1.62 MultipleMeltPeaks       |
| aadA2-02        | 34C    |    | 31.17 | 81.87      | 1.82                         |
| aadA2-03        | 34C    |    | 38.79 | 88.3       | 1.77 MultipleMeltPeaks       |
| aadA5-01        | 34C    |    | 36.32 | 84.61      | 1.83 MultipleMeltPeaks       |
| aadA5-02        | 34C    |    | 31.11 | 78.06      | 1.97 MultipleMeltPeaks       |
| aadA9-01        | 34C    |    | 37.24 | 84.78      | 1.72                         |
| aadA9-02        | 34C    |    | 33.18 | 89.83      | 1.94                         |
| aadD            | 34C    |    |       |            | CurveFitFailed               |
| aadE            | 34C    |    |       |            | CurveFitFailed               |
| acrA-01         | 34C    |    | 22.38 | 83.14      | 1.96                         |
| acrA-02         | 34C    |    | 34.74 | 87.89      | 1.87                         |
| acrA-03         | 34C    |    | 36.98 | 89.42      | 1.66                         |
| acrA-04         | 34C    |    | 29.87 | 88.75      | 1.94                         |
| acrA-05         | 34C    |    | 28.89 | 88.14      | 1.95                         |
| acrB-01         | 34C    |    |       |            | BadR2, LowEfficiency, CtIsS  |
| acrF            | 34C    |    | 32.09 | 82.12      | 1.88                         |
| acrR-01         | 34C    |    | 35.48 | 90.26      | 1.76                         |
| acrR-02         | 34C    |    | 35.1  | 83.22      | 1.89                         |
| Actin           | 34C    |    | 21.67 | 87         | 1.95                         |
| adeA            | 34C    |    | 37.14 | 78.68      | 1.82 MultipleMeltPeaks       |
| ampC-01         | 34C    |    | 29.69 | 81.24      | 1.88 MultipleMeltPeaks       |
| ampC-02         | 34C    |    | 37.17 | 85.14      | 1.82 MultipleMeltPeaks       |
| ampC-04         | 34C    |    | 31.27 | 78.28      | 1.88 MultipleMeltPeaks       |
| ampC-05         | 34C    |    |       |            | CurveFitFailed               |
| ampC-06         | 34C    |    |       |            | CurveFitFailed               |
| ampC-07         | 34C    |    |       |            | CurveFitFailed               |
| ampC-09         | 34C    |    | 32.86 | 90.17      | 1.85 MultipleMeltPeaks       |
| ampC/blaDH      | 34C    |    | 30.22 | 84.32      | 1.98                         |

|                            |     |       |       |      |                              |
|----------------------------|-----|-------|-------|------|------------------------------|
| aph                        | 34C |       |       |      | LowEfficiency, CtIsSmall, S: |
| aph(2')-Id-01              | 34C |       |       |      | LowEfficiency, CtIsSmall, S: |
| aph(2')-Id-02              | 34C |       |       |      | LowEfficiency, CtIsSmall, S: |
| aph6ia                     | 34C |       |       |      | CurveFitFailed               |
| aphA1(aka k <sub>z</sub> ) | 34C | 36.78 | 77.91 | 1.83 | MultipleMeltPeaks            |
| bacA-01                    | 34C |       |       |      | BadR2, LowEfficiency, CtIsS  |
| bacA-02                    | 34C |       |       |      | CurveFitFailed               |
| BETA-globin                | 34C | 23.15 | 84.09 | 2    |                              |
| bla-ACC-1                  | 34C | 33.84 | 87.68 | 1.73 |                              |
| bla-L1                     | 34C | 29.56 | 86.12 | 1.97 |                              |
| bla1                       | 34C |       |       |      | LowEfficiency, CtIsSmall, S: |
| blaCMY                     | 34C |       |       |      | CurveFitFailed               |
| blaCMY2-01                 | 34C | 30.75 | 82.7  | 2.02 |                              |
| blaCMY2-02                 | 34C | 28.48 | 92.28 | 1.87 |                              |
| blaCTX-M-01                | 34C | 37.75 | 87.97 | 1.67 | MultipleMeltPeaks            |
| blaCTX-M-02                | 34C | 32.79 | 91.84 | 1.86 | MultipleMeltPeaks            |
| blaCTX-M-03                | 34C |       |       |      | CurveFitFailed               |
| blaCTX-M-04                | 34C | 29.07 | 90.42 | 2.04 | MultipleMeltPeaks            |
| blaCTX-M-05                | 34C | 30.95 | 86.81 | 1.72 |                              |
| blaCTX-M-06                | 34C |       |       |      | BadR2, LowEfficiency, CtIsS  |
| blaGES                     | 34C |       |       |      | LowEfficiency, CtIsSmall, S: |
| blaIMP-01                  | 34C |       |       |      | CurveFitFailed               |
| blaIMP-02                  | 34C | 35    | 85.25 | 1.89 |                              |
| blaMOX/blaC                | 34C | 36.86 | 87.95 | 1.84 |                              |
| blaOCH                     | 34C |       |       |      | NoAmplification              |
| blaOKP                     | 34C |       |       |      | NoAmplification              |
| blaOXA1/blaC               | 34C |       |       |      | LowEfficiency, CtIsSmall, S: |
| blaOXA10-01                | 34C |       |       |      | LowEfficiency, CtIsSmall, S: |
| blaOXA10-02                | 34C |       |       |      | CurveFitFailed               |
| blaOXY                     | 34C | 34.82 | 88.64 | 1.71 |                              |
| blaPAO                     | 34C |       |       |      | LowEfficiency, CtIsSmall, S: |
| blaPER                     | 34C |       |       |      | CurveFitFailed               |
| blaPSE                     | 34C |       |       |      | CurveFitFailed               |
| blaROB                     | 34C | 33.38 | 81.08 | 1.95 |                              |
| blaSFO                     | 34C | 32.14 | 82.92 | 1.86 | MultipleMeltPeaks            |
| blaSHV-01                  | 34C | 35.31 | 84.04 | 1.95 |                              |
| blaSHV-02                  | 34C | 37.3  | 84.91 | 1.82 | MultipleMeltPeaks            |
| blaTEM                     | 34C |       |       |      | NoAmplification              |
| blaTLA                     | 34C |       |       |      | LowEfficiency, CtIsSmall, S: |
| blaVEB                     | 34C |       |       |      | LowEfficiency, CtIsSmall, S: |
| blaVIM                     | 34C |       |       |      | NoAmplification              |
| blaZ                       | 34C |       |       |      | LowEfficiency, CtIsSmall, S: |
| carB                       | 34C | 38.3  | 88.7  | 1.72 | MultipleMeltPeaks            |
| catA1                      | 34C |       |       |      | NoAmplification              |
| catB3                      | 34C |       |       |      | LowEfficiency, CtIsSmall, C: |
| catB8                      | 34C | 30.21 | 82.66 | 1.96 |                              |

|            |     |       |       |      |                              |
|------------|-----|-------|-------|------|------------------------------|
| ceoA       | 34C | 28.22 | 82.02 | 1.95 | MultipleMeltPeaks            |
| cepA       | 34C |       |       |      | LowEfficiency, CtIsSmall, S: |
| cfiA       | 34C | 36    | 79.71 | 1.89 | MultipleMeltPeaks            |
| cfr        | 34C |       |       |      | LowEfficiency, CtIsSmall, S: |
| cfxA       | 34C | 20.29 | 77.59 | 1.99 |                              |
| cmeA       | 34C |       |       |      | CurveFitFailed               |
| cmlA1-01   | 34C | 34.56 | 87.29 | 1.9  |                              |
| cmlA1-02   | 34C | 31.92 | 88.52 | 1.88 |                              |
| cmr        | 34C | 35.64 | 72.7  | 1.97 |                              |
| cmx(A)     | 34C | 28.96 | 84.51 | 2.02 | MultipleMeltPeaks            |
| cphA-01    | 34C | 32.15 | 89.64 | 1.91 |                              |
| cphA-02    | 34C | 33.55 | 82.37 | 1.96 |                              |
| dfrA1      | 34C | 34.54 | 78.4  | 1.96 | MultipleMeltPeaks            |
| dfrA12     | 34C |       |       |      | CurveFitFailed               |
| emrD       | 34C | 32.62 | 88.82 | 1.95 |                              |
| ereA       | 34C | 34.21 | 82.32 | 1.94 | MultipleMeltPeaks            |
| ereB       | 34C | 38    | 88.31 | 1.77 | MultipleMeltPeaks            |
| erm(34)    | 34C | 34.03 | 90.84 | 1.92 | MultipleMeltPeaks            |
| erm(35)    | 34C |       |       |      | LowEfficiency, CtIsSmall, S: |
| erm(36)    | 34C | 27.76 | 85.92 | 2.11 |                              |
| ermA       | 34C |       |       |      | LowEfficiency, CtIsSmall, S: |
| ermA/ermTR | 34C |       |       |      | NoAmplification              |
| ermB       | 34C | 26.8  | 74.93 | 2.09 |                              |
| ermC       | 34C |       |       |      | LowEfficiency, CtIsSmall, S: |
| ermF       | 34C |       |       |      | LowEfficiency, CtIsSmall, S: |
| ermJ/ermD  | 34C |       |       |      | LowEfficiency, CtIsSmall, S: |
| ermK-01    | 34C |       |       |      | CurveFitFailed               |
| ermK-02    | 34C | 33.6  | 83.02 | 1.96 |                              |
| ermT-01    | 34C |       |       |      | LowEfficiency, CtIsSmall, S: |
| ermT-02    | 34C |       |       |      | CurveFitFailed               |
| ermX       | 34C | 38.27 | 83.66 | 1.64 |                              |
| ermY       | 34C |       |       |      | LowEfficiency, CtIsSmall, S: |
| fabK       | 34C | 26.45 | 78.84 | 2.06 |                              |
| floR       | 34C | 32.34 | 89.82 | 1.81 |                              |
| folA       | 34C |       |       |      | NoAmplification              |
| fosB       | 34C |       |       |      | LowEfficiency, CtIsSmall, S: |
| fosX       | 34C |       |       |      | CurveFitFailed               |
| fox5       | 34C | 28.87 | 86.07 | 1.97 |                              |
| imiR       | 34C |       |       |      | LowEfficiency, CtIsSmall, C: |
| ImrA-01    | 34C |       |       |      | LowEfficiency, CtIsSmall, S: |
| intl       | 34C | 28.91 | 88.43 | 1.98 |                              |
| intl1      | 34C | 20.49 | 87.51 | 2.03 |                              |
| IS613      | 34C | 27.95 | 79.52 | 2.06 |                              |
| lnuA-01    | 34C |       |       |      | LowEfficiency, CtIsSmall, S: |
| lnuB-01    | 34C |       |       |      | BadR2, LowEfficiency, CtIsS: |
| lnuB-02    | 34C |       |       |      | LowEfficiency, CtIsSmall, S: |

|                |     |       |       |      |                              |
|----------------|-----|-------|-------|------|------------------------------|
| lnuC           | 34C | 35.03 | 84.28 | 1.72 |                              |
| marR-01        | 34C | 30.34 | 87.15 | 1.98 |                              |
| matA/mel       | 34C | 17.86 | 77.7  | 2.1  |                              |
| mdet1          | 34C |       |       |      | CurveFitFailed               |
| mdtA           | 34C |       |       |      | CurveFitFailed               |
| mdtE/yhiU      | 34C | 27.21 | 87.93 | 1.92 |                              |
| mecA           | 34C |       |       |      | LowEfficiency, CtIsSmall, S: |
| mefA           | 34C | 16.97 | 80.52 | 2.01 |                              |
| mepA           | 34C | 30.63 | 90.89 | 2.03 | MultipleMeltPeaks            |
| mexA           | 34C |       |       |      | CurveFitFailed               |
| mexD           | 34C | 37.84 | 79.66 | 1.98 |                              |
| mexE           | 34C | 30.19 | 88.05 | 1.98 |                              |
| mexF           | 34C | 27.81 | 86.97 | 1.88 |                              |
| mphA-01        | 34C | 29.72 | 91.65 | 1.98 | MultipleMeltPeaks            |
| mphA-02        | 34C | 28.42 | 89.29 | 2.03 | MultipleMeltPeaks            |
| mphB           | 34C |       |       |      | CurveFitFailed               |
| mphC           | 34C |       |       |      | LowEfficiency, CtIsSmall, S: |
| msrA-01        | 34C |       |       |      | LowEfficiency, CtIsSmall, S: |
| msrC-01        | 34C |       |       |      | NoAmplification              |
| mtrC-01        | 34C | 39.76 | 85.09 | 1.69 | MultipleMeltPeaks            |
| mtrC-02        | 34C |       |       |      | CurveFitFailed               |
| mtrD-02        | 34C | 28.76 | 85.49 | 2.04 | MultipleMeltPeaks            |
| mtrD-03        | 34C | 32.62 | 85.6  | 1.95 |                              |
| NDM1           | 34C |       |       |      | LowEfficiency, CtIsSmall, S: |
| nimE           | 34C |       |       |      | CurveFitFailed               |
| nisB           | 34C | 37.23 | 87.01 | 1.79 |                              |
| oleC           | 34C | 35.6  | 86.93 | 1.84 | MultipleMeltPeaks            |
| oprD           | 34C | 28.99 | 82.9  | 1.98 | MultipleMeltPeaks            |
| oprJ           | 34C | 30.84 | 91    | 1.94 |                              |
| pbp            | 34C | 34.18 | 84.84 | 1.94 | MultipleMeltPeaks            |
| pbp2x          | 34C |       |       |      | CurveFitFailed               |
| Pbp5           | 34C |       |       |      | LowEfficiency, CtIsSmall, S: |
| penA           | 34C | 33.01 | 91.62 | 1.84 |                              |
| pikR1          | 34C | 34.92 | 79.91 | 1.97 | MultipleMeltPeaks            |
| pikR2          | 34C | 29.01 | 91.69 | 2.11 |                              |
| pmrA           | 34C | 22.48 | 79.17 | 2.06 |                              |
| pncA           | 34C | 26.4  | 86.36 | 1.9  |                              |
| putative multi | 34C |       |       |      | CurveFitFailed               |
| qac            | 34C |       |       |      | CurveFitFailed               |
| qacA           | 34C |       |       |      | LowEfficiency, CtIsSmall, S: |
| qacA/qacB      | 34C |       |       |      | LowEfficiency, CtIsSmall, S: |
| qacEdelta1-0   | 34C |       |       |      | LowEfficiency, CtIsSmall, S: |
| qacEdelta1-0   | 34C | 29.76 | 82.25 | 1.95 | MultipleMeltPeaks            |
| qacH-01        | 34C | 34.85 | 79.72 | 1.93 | MultipleMeltPeaks            |
| qacH-02        | 34C | 35.19 | 83.91 | 1.68 |                              |
| qnrA           | 34C | 30.94 | 81.11 | 2.04 |                              |



|              |     |       |       |      |                                          |
|--------------|-----|-------|-------|------|------------------------------------------|
| rarD-02      | 34C | 36.94 | 83.11 | 1.88 |                                          |
| sat4         | 34C |       |       |      | LowEfficiency, CtIsSmall, S <sub>c</sub> |
| sdeB         | 34C |       |       |      | LowEfficiency, CtIsSmall, S <sub>c</sub> |
| spcN-01      | 34C |       |       |      | CurveFitFailed                           |
| speA         | 34C |       |       |      | NoAmplification                          |
| str          | 34C |       |       |      | CurveFitFailed                           |
| strA         | 34C | 35.85 | 91.58 | 1.73 |                                          |
| strB         | 34C | 35.99 | 78.11 | 1.9  |                                          |
| sul1         | 34C |       |       |      | NoAmplification                          |
| sul2         | 34C |       |       |      | BadR2, LowEfficiency, CtIsS              |
| sulA/foIP-01 | 34C | 21.54 | 81.26 | 2    |                                          |
| sulA/foIP-03 | 34C | 21.09 | 83.98 | 2    |                                          |
| tet(32)      | 34C |       |       |      | CurveFitFailed                           |
| tet(34)      | 34C | 32.08 | 75.55 | 2.01 |                                          |
| tet(35)      | 34C |       |       |      | NoAmplification                          |
| tet(36)-A    | 34C | 35.94 | 81.92 | 1.84 |                                          |
| tet(36)-B    | 34C |       |       |      | LowEfficiency, CtIsSmall, S <sub>c</sub> |
| tet(37)      | 34C | 33.87 | 88.64 | 1.91 | MultipleMeltPeaks                        |
| tetA-01      | 34C | 30.99 | 85.1  | 1.95 |                                          |
| tetA-02      | 34C | 33.38 | 83.74 | 1.92 | MultipleMeltPeaks                        |
| tetB-01      | 34C | 28.02 | 79.25 | 1.95 | MultipleMeltPeaks                        |
| tetB-02      | 34C | 26.35 | 79.7  | 1.99 |                                          |
| tetC-01      | 34C | 26.45 | 75.23 | 1.97 |                                          |
| tetC-02      | 34C | 26.92 | 76.01 | 2.05 |                                          |
| tetD-01      | 34C |       |       |      | CurveFitFailed                           |
| tetD-02      | 34C | 30.69 | 88.42 | 1.96 |                                          |
| tetE         | 34C |       |       |      | LowEfficiency, CtIsSmall, S <sub>c</sub> |
| tetG-01      | 34C | 35.27 | 89.49 | 1.82 | MultipleMeltPeaks                        |
| tetG-02      | 34C | 30.13 | 88.02 | 1.98 | MultipleMeltPeaks                        |
| tetH         | 34C |       |       |      | LowEfficiency, CtIsSmall, C <sub>i</sub> |
| tetJ         | 34C |       |       |      | LowEfficiency, CtIsSmall, S <sub>c</sub> |
| tetK         | 34C |       |       |      | LowEfficiency, CtIsSmall, S <sub>c</sub> |
| tetL-01      | 34C |       |       |      | LowEfficiency, CtIsSmall, C <sub>i</sub> |
| tetL-02      | 34C | 30.63 | 86.82 | 2.02 |                                          |
| tetM-01      | 34C | 20.53 | 76.24 | 2    |                                          |
| tetM-02      | 34C | 20.52 | 77.73 | 2.06 |                                          |
| tetO-01      | 34C | 23.61 | 76.88 | 2.06 |                                          |
| tetPA        | 34C |       |       |      | CurveFitFailed                           |
| tetPB-01     | 34C | 34.41 | 87.47 | 1.91 |                                          |
| tetPB-02     | 34C | 29.17 | 84.83 | 2.08 |                                          |
| tetPB-03     | 34C |       |       |      | LowEfficiency, CtIsSmall, S <sub>c</sub> |
| tetPB-05     | 34C |       |       |      | LowEfficiency, CtIsSmall, S <sub>c</sub> |
| tetQ         | 34C | 24.48 | 77.17 | 2.07 |                                          |
| tetR-02      | 34C | 29.47 | 90.71 | 1.93 |                                          |
| tetR-03      | 34C | 26.23 | 76.18 | 1.99 |                                          |
| tetS         | 34C | 30.88 | 84.26 | 1.59 | MultipleMeltPeaks                        |

|             |     |       |       |      |                              |
|-------------|-----|-------|-------|------|------------------------------|
| tetT        | 34C |       |       |      | LowEfficiency, CtIsSmall, S: |
| tetU-01     | 34C |       |       |      | LowEfficiency, CtIsSmall, S: |
| tetV        | 34C |       |       |      | CurveFitFailed               |
| tetW-01     | 34C |       |       |      | LowEfficiency, CtIsSmall, S: |
| tetX        | 34C | 36.59 | 81.86 | 1.9  |                              |
| tnpA-01     | 34C |       |       |      | LowEfficiency, CtIsSmall, S: |
| tnpA-02     | 34C | 35.25 | 89.23 | 1.8  |                              |
| tnpA-03     | 34C | 34.29 | 74.59 | 2.09 |                              |
| tnpA-04     | 34C | 36.45 | 84.72 | 1.87 |                              |
| tnpA-05     | 34C | 27.67 | 80.83 | 1.93 |                              |
| tnpA-07     | 34C |       |       |      | CurveFitFailed               |
| tolC-01     | 34C | 33.94 | 82.84 | 1.92 |                              |
| tolC-02     | 34C | 30.6  | 84    | 1.96 | MultipleMeltPeaks            |
| tolC-03     | 34C | 30.1  | 88.05 | 1.97 |                              |
| Tp614       | 34C |       |       |      | LowEfficiency, CtIsSmall, S: |
| ttgA        | 34C | 38.11 | 80.38 | 1.74 | MultipleMeltPeaks            |
| ttgB        | 34C |       |       |      | CurveFitFailed               |
| vanA        | 34C |       |       |      | CurveFitFailed               |
| vanB-01     | 34C | 28.04 | 86.67 | 1.66 | MultipleMeltPeaks            |
| vanC-01     | 34C |       |       |      | LowEfficiency, CtIsSmall, C: |
| vanC-02     | 34C |       |       |      | CurveFitFailed               |
| vanC-03     | 34C | 26.24 | 85.31 | 1.99 | MultipleMeltPeaks            |
| vanC1       | 34C |       |       |      | LowEfficiency, CtIsSmall, S: |
| vanC2/vanC3 | 34C | 31.27 | 82.67 | 2.1  | MultipleMeltPeaks            |
| vanG        | 34C |       |       |      | LowEfficiency, CtIsSmall, C: |
| vanHB       | 34C | 31.32 | 87.61 | 1.95 | MultipleMeltPeaks            |
| vanHD       | 34C |       |       |      | CurveFitFailed               |
| vanRA-01    | 34C |       |       |      | CurveFitFailed               |
| vanRA-02    | 34C |       |       |      | LowEfficiency, CtIsSmall, S: |
| vanRB       | 34C | 35.07 | 87.29 | 2    | MultipleMeltPeaks            |
| vanRC       | 34C |       |       |      | LowEfficiency, CtIsSmall, S: |
| vanRC4      | 34C |       |       |      | LowEfficiency, CtIsSmall, S: |
| vanRD       | 34C |       |       |      | CurveFitFailed               |
| vanSA       | 34C |       |       |      | LowEfficiency, CtIsSmall, S: |
| vanSB       | 34C | 36.21 | 86.6  | 1.94 |                              |
| vanSC-01    | 34C | 37.03 | 84.06 | 1.95 |                              |
| vanSC-02    | 34C |       |       |      | NoAmplification              |
| vanTC-01    | 34C |       |       |      | LowEfficiency, CtIsSmall, S: |
| vanTC-02    | 34C | 30.92 | 86.53 | 1.72 |                              |
| vanTE       | 34C | 39.03 | 84.42 | 1.79 |                              |
| vanTG       | 34C |       |       |      | LowEfficiency, CtIsSmall, C: |
| vanWB       | 34C |       |       |      | LowEfficiency, CtIsSmall, S: |
| vanWG       | 34C | 37.51 | 73.93 | 1.89 |                              |
| vanXA       | 34C |       |       |      | CurveFitFailed               |
| vanXB       | 34C |       |       |      | NoAmplification              |
| vanXD       | 34C | 32.7  | 75.46 | 2.05 |                              |

|              |     |       |       |      |                              |
|--------------|-----|-------|-------|------|------------------------------|
| vanYB        | 34C | 33.14 | 74.34 | 1.94 | MultipleMeltPeaks            |
| vanYD-01     | 34C | 30.2  | 88.66 | 1.82 |                              |
| vanYD-02     | 34C |       |       |      | LowEfficiency, CtIsSmall, S: |
| vatB-01      | 34C |       |       |      | LowEfficiency, CtIsSmall, S: |
| vatB-02      | 34C |       |       |      | LowEfficiency, CtIsSmall, S: |
| vatC-01      | 34C | 33.67 | 74.01 | 1.99 | MultipleMeltPeaks            |
| vatC-02      | 34C | 36.29 | 83.23 | 1.83 |                              |
| vatE-01      | 34C | 30.67 | 76.57 | 2.13 |                              |
| vatE-02      | 34C | 40.06 | 79.32 | 1.78 | MultipleMeltPeaks            |
| vgaA-01      | 34C | 34.51 | 76.48 | 1.99 |                              |
| vgaA-02      | 34C |       |       |      | CurveFitFailed               |
| vgb-01       | 34C |       |       |      | CurveFitFailed               |
| vgbB-01      | 34C |       |       |      | CurveFitFailed               |
| vgbB-02      | 34C |       |       |      | LowEfficiency, CtIsSmall, S: |
| yceE/mdtG-0  | 34C |       |       |      | LowEfficiency, CtIsSmall, S: |
| yceE/mdtG-0  | 34C |       |       |      | LowEfficiency, CtIsSmall, Ci |
| yceL/mdtH-0  | 34C | 31.03 | 86.79 | 1.96 |                              |
| yceL/mdtH-0  | 34C |       |       |      | LowEfficiency, CtIsSmall, S: |
| yceL/mdtH-0  | 34C | 35.77 | 89.25 | 1.79 |                              |
| yidY/mdtL-01 | 34C | 30.55 | 75.48 | 1.98 | MultipleMeltPeaks            |
| yidY/mdtL-02 | 34C | 38.03 | 86.17 | 1.77 |                              |































| Assay          | Sample | Ct | Tm    | Efficiency | flag                   |
|----------------|--------|----|-------|------------|------------------------|
| 16S rRNA       | 35A    |    | 15.23 | 82.22      | 2.04                   |
| aac            | 35A    |    | 32.68 | 88.23      | 1.97                   |
| aac(6')-Ib(akz | 35A    |    | 36.07 | 78.81      | 1.9                    |
| aac(6')-Ib(akz | 35A    |    | 31.94 | 89.21      | 1.91                   |
| aac(6')-Ib(akz | 35A    |    |       |            | CurveFitFailed         |
| aac(6')-II     | 35A    |    | 31.98 | 90.87      | 1.89                   |
| aac(6')I1      | 35A    |    | 34.32 | 89.24      | 1.78 MultipleMeltPeaks |
| aacA/aphD      | 35A    |    |       |            | NoAmplification        |
| aacC           | 35A    |    | 28.78 | 83.87      | 1.9                    |
| aacC1          | 35A    |    |       |            | CurveFitFailed         |
| aacC2          | 35A    |    | 41.89 | 61.66      | 1.69 MultipleMeltPeaks |
| aacC4          | 35A    |    | 34.81 | 89.23      | 1.78                   |
| aadA-01        | 35A    |    | 34.62 | 87.16      | 1.84                   |
| aadA-02        | 35A    |    | 40.87 | 78.67      | 1.71 MultipleMeltPeaks |
| aadA-1-01      | 35A    |    | 26.08 | 79.7       | 1.94                   |
| aadA-1-02      | 35A    |    | 25.01 | 76.39      | 2.02                   |
| aadA1          | 35A    |    |       |            | NoAmplification        |
| aadA2-01       | 35A    |    |       |            | CurveFitFailed         |
| aadA2-02       | 35A    |    |       |            | NoAmplification        |
| aadA2-03       | 35A    |    | 36.7  | 78.86      | 1.85                   |
| aadA5-01       | 35A    |    |       |            | CurveFitFailed         |
| aadA5-02       | 35A    |    | 32.28 | 84.99      | 1.93                   |
| aadA9-01       | 35A    |    | 30.17 | 88.06      | 1.86 MultipleMeltPeaks |
| aadA9-02       | 35A    |    |       |            | CurveFitFailed         |
| aadD           | 35A    |    |       |            | NoAmplification        |
| aadE           | 35A    |    | 25.01 | 72.2       | 2.08                   |
| acrA-01        | 35A    |    | 22.41 | 83.03      | 1.96                   |
| acrA-02        | 35A    |    | 34.89 | 87.58      | 1.87                   |
| acrA-03        | 35A    |    | 35.36 | 89.91      | 1.78 MultipleMeltPeaks |
| acrA-04        | 35A    |    | 34.15 | 88.37      | 1.99                   |
| acrA-05        | 35A    |    | 27.85 | 92.23      | 1.9                    |
| acrB-01        | 35A    |    | 38.07 | 88.34      | 1.74 MultipleMeltPeaks |
| acrF           | 35A    |    | 35.58 | 83.01      | 1.85                   |
| acrR-01        | 35A    |    | 34.77 | 85.29      | 1.8 MultipleMeltPeaks  |
| acrR-02        | 35A    |    | 39.89 | 83.97      | 1.74 MultipleMeltPeaks |
| Actin          | 35A    |    | 25.21 | 83.59      | 1.94 MultipleMeltPeaks |
| adeA           | 35A    |    | 32.17 | 77.19      | 1.95                   |
| ampC-01        | 35A    |    | 29.76 | 88.77      | 1.98                   |
| ampC-02        | 35A    |    | 33.51 | 89.79      | 2.01 MultipleMeltPeaks |
| ampC-04        | 35A    |    | 32.98 | 81.09      | 1.89                   |
| ampC-05        | 35A    |    | 36.7  | 89.48      | 2.35 MultipleMeltPeaks |
| ampC-06        | 35A    |    |       |            | CurveFitFailed         |
| ampC-07        | 35A    |    | 37.32 | 88.03      | 1.72                   |
| ampC-09        | 35A    |    | 40.64 | 63.61      | 1.56 MultipleMeltPeaks |
| ampC/blaDH     | 35A    |    | 34.17 | 88.38      | 1.88 MultipleMeltPeaks |

|                            |     |       |       |      |                             |
|----------------------------|-----|-------|-------|------|-----------------------------|
| aph                        | 35A |       |       |      | NoAmplification             |
| aph(2')-Id-01              | 35A |       |       |      | NoAmplification             |
| aph(2')-Id-02              | 35A |       |       |      | NoAmplification             |
| aph6ia                     | 35A |       |       |      | CurveFitFailed              |
| aphA1(aka k <sub>z</sub> ) | 35A |       |       |      | NoAmplification             |
| bacA-01                    | 35A | 39.29 | 65.83 | 1.71 | MultipleMeltPeaks           |
| bacA-02                    | 35A | 34.29 | 83.45 | 1.72 |                             |
| BETA-globin                | 35A | 28.1  | 84.04 | 1.96 |                             |
| bla-ACC-1                  | 35A | 37.33 | 85.89 | 1.81 |                             |
| bla-L1                     | 35A | 34.96 | 86.19 | 1.86 | MultipleMeltPeaks           |
| bla1                       | 35A |       |       |      | LowEfficiency, CtIsSmall, C |
| blaCMY                     | 35A | 31.45 | 79.95 | 1.93 |                             |
| blaCMY2-01                 | 35A | 38.81 | 61.61 | 2.01 | MultipleMeltPeaks           |
| blaCMY2-02                 | 35A | 31.99 | 84.96 | 1.92 | MultipleMeltPeaks           |
| blaCTX-M-01                | 35A | 32.59 | 90.21 | 1.91 |                             |
| blaCTX-M-02                | 35A | 35.85 | 89.33 | 1.74 |                             |
| blaCTX-M-03                | 35A | 36.23 | 89.5  | 1.84 |                             |
| blaCTX-M-04                | 35A | 31.88 | 89.22 | 1.96 |                             |
| blaCTX-M-05                | 35A | 35.14 | 75.89 | 1.66 |                             |
| blaCTX-M-06                | 35A |       |       |      | NoAmplification             |
| blaGES                     | 35A |       |       |      | NoAmplification             |
| blaIMP-01                  | 35A |       |       |      | NoAmplification             |
| blaIMP-02                  | 35A |       |       |      | NoAmplification             |
| blaMOX/blaC                | 35A | 38.83 | 83.11 | 1.71 | MultipleMeltPeaks           |
| blaOCH                     | 35A |       |       |      | NoAmplification             |
| blaOKP                     | 35A |       |       |      | NoAmplification             |
| blaOXA1/blaC               | 35A |       |       |      | NoAmplification             |
| blaOXA10-01                | 35A |       |       |      | CurveFitFailed              |
| blaOXA10-02                | 35A |       |       |      | CurveFitFailed              |
| blaOXY                     | 35A | 32.06 | 88.7  | 1.87 | MultipleMeltPeaks           |
| blaPAO                     | 35A |       |       |      | NoAmplification             |
| blaPER                     | 35A |       |       |      | CurveFitFailed              |
| blaPSE                     | 35A |       |       |      | CurveFitFailed              |
| blaROB                     | 35A | 36.57 | 89.01 | 1.75 |                             |
| blaSFO                     | 35A | 31.35 | 83.86 | 1.91 | MultipleMeltPeaks           |
| blaSHV-01                  | 35A | 37.16 | 89.09 | 1.58 |                             |
| blaSHV-02                  | 35A | 38.39 | 87.09 | 1.88 |                             |
| blaTEM                     | 35A |       |       |      | NoAmplification             |
| blaTLA                     | 35A |       |       |      | NoAmplification             |
| blaVEB                     | 35A |       |       |      | NoAmplification             |
| blaVIM                     | 35A | 35.61 | 89.21 | 1.86 |                             |
| blaZ                       | 35A |       |       |      | NoAmplification             |
| carB                       | 35A | 34.11 | 85.94 | 1.92 |                             |
| catA1                      | 35A |       |       |      | NoAmplification             |
| catB3                      | 35A | 35.23 | 80.1  | 1.91 |                             |
| catB8                      | 35A | 32.55 | 81.97 | 1.95 |                             |

|            |     |       |       |      |                             |
|------------|-----|-------|-------|------|-----------------------------|
| ceoA       | 35A | 32.79 | 91.56 | 1.84 |                             |
| cepA       | 35A |       |       |      | NoAmplification             |
| cfiA       | 35A | 36.07 | 87.55 | 1.95 |                             |
| cfr        | 35A |       |       |      | LowEfficiency, CtIsSmall, C |
| cfxA       | 35A | 22.67 | 77.48 | 2.02 |                             |
| cmeA       | 35A | 37.8  | 78.37 | 1.76 |                             |
| cmlA1-01   | 35A | 37.78 | 62.25 | 1.94 | MultipleMeltPeaks           |
| cmlA1-02   | 35A | 35.49 | 92.61 | 1.76 |                             |
| cmr        | 35A |       |       |      | NoAmplification             |
| cmx(A)     | 35A | 31.67 | 87.01 | 1.96 |                             |
| cphA-01    | 35A | 34.29 | 78.09 | 1.89 |                             |
| cphA-02    | 35A | 32.24 | 82.36 | 1.95 |                             |
| dfrA1      | 35A |       |       |      | NoAmplification             |
| dfrA12     | 35A |       |       |      | NoAmplification             |
| emrD       | 35A | 29.87 | 88.65 | 1.91 |                             |
| ereA       | 35A |       |       |      | CurveFitFailed              |
| ereB       | 35A |       |       |      | CurveFitFailed              |
| erm(34)    | 35A | 35.58 | 90.64 | 1.83 |                             |
| erm(35)    | 35A |       |       |      | NoAmplification             |
| erm(36)    | 35A | 34.37 | 85.53 | 1.99 |                             |
| ermA       | 35A |       |       |      | NoAmplification             |
| ermA/ermTR | 35A |       |       |      | NoAmplification             |
| ermB       | 35A | 21.56 | 75.06 | 2.11 |                             |
| ermC       | 35A |       |       |      | CurveFitFailed              |
| ermF       | 35A | 24.48 | 74.62 | 2.01 |                             |
| ermJ/ermD  | 35A |       |       |      | NoAmplification             |
| ermK-01    | 35A |       |       |      | NoAmplification             |
| ermK-02    | 35A |       |       |      | CurveFitFailed              |
| ermT-01    | 35A |       |       |      | NoAmplification             |
| ermT-02    | 35A |       |       |      | CurveFitFailed              |
| ermX       | 35A | 28.32 | 83.01 | 1.89 |                             |
| ermY       | 35A |       |       |      | NoAmplification             |
| fabK       | 35A | 20.6  | 79.24 | 2.2  |                             |
| floR       | 35A | 35.56 | 84.48 | 1.82 | MultipleMeltPeaks           |
| folA       | 35A |       |       |      | NoAmplification             |
| fosB       | 35A |       |       |      | LowEfficiency, CtIsSmall, S |
| fosX       | 35A |       |       |      | NoAmplification             |
| fox5       | 35A | 30.98 | 83.97 | 1.92 |                             |
| imiR       | 35A |       |       |      | CurveFitFailed              |
| ImrA-01    | 35A |       |       |      | NoAmplification             |
| intl       | 35A | 32.51 | 87.07 | 1.95 | MultipleMeltPeaks           |
| intl1      | 35A | 21.66 | 87.41 | 1.99 |                             |
| IS613      | 35A | 21.59 | 79.68 | 2.05 |                             |
| lnuA-01    | 35A |       |       |      | LowEfficiency, CtIsSmall, C |
| lnuB-01    | 35A |       |       |      | BadR2, LowEfficiency, CtIs  |
| lnuB-02    | 35A |       |       |      | BadR2, LowEfficiency, CtIs  |

|               |     |       |       |      |                                          |
|---------------|-----|-------|-------|------|------------------------------------------|
| lnuC          | 35A |       |       |      | CurveFitFailed                           |
| marR-01       | 35A | 31.77 | 89.61 | 1.92 |                                          |
| matA/mel      | 35A | 18.44 | 77.67 | 2.07 |                                          |
| mdet1         | 35A |       |       |      | NoAmplification                          |
| mdtA          | 35A | 37.45 | 61.78 | 1.89 | MultipleMeltPeaks                        |
| mdtE/yhiU     | 35A | 32.99 | 90.68 | 1.82 |                                          |
| mecA          | 35A |       |       |      | NoAmplification                          |
| mefA          | 35A | 18.1  | 80.45 | 1.98 |                                          |
| mepA          | 35A | 31.54 | 87.12 | 2.01 |                                          |
| mexA          | 35A |       |       |      | CurveFitFailed                           |
| mexD          | 35A | 36.28 | 79.66 | 1.93 |                                          |
| mexE          | 35A | 32.2  | 88.39 | 1.94 |                                          |
| mexF          | 35A | 28.87 | 87.7  | 1.94 | MultipleMeltPeaks                        |
| mphA-01       | 35A | 29.65 | 89.31 | 1.96 |                                          |
| mphA-02       | 35A | 27.53 | 87.61 | 1.93 |                                          |
| mphB          | 35A | 39.6  | 72.11 | 1.68 | MultipleMeltPeaks                        |
| mphC          | 35A |       |       |      | NoAmplification                          |
| msrA-01       | 35A |       |       |      | CurveFitFailed                           |
| msrC-01       | 35A |       |       |      | NoAmplification                          |
| mtrC-01       | 35A | 37.13 | 82.99 | 1.78 |                                          |
| mtrC-02       | 35A |       |       |      | NoAmplification                          |
| mtrD-02       | 35A | 28.7  | 81.56 | 2.03 |                                          |
| mtrD-03       | 35A | 30.38 | 79.86 | 1.87 |                                          |
| NDM1          | 35A |       |       |      | NoAmplification                          |
| nimE          | 35A |       |       |      | CurveFitFailed                           |
| nisB          | 35A |       |       |      | CurveFitFailed                           |
| oleC          | 35A | 32.82 | 89.83 | 1.9  | MultipleMeltPeaks                        |
| oprD          | 35A | 28.66 | 87.23 | 1.93 | MultipleMeltPeaks                        |
| oprJ          | 35A | 29.12 | 90.71 | 1.95 |                                          |
| pbp           | 35A | 37.58 | 87.05 | 1.8  |                                          |
| pbp2x         | 35A |       |       |      | NoAmplification                          |
| Pbp5          | 35A |       |       |      | LowEfficiency, CtIsSmall, S <sub>c</sub> |
| penA          | 35A | 34.77 | 88.36 | 1.71 | MultipleMeltPeaks                        |
| pikR1         | 35A | 27.97 | 89.21 | 1.91 |                                          |
| pikR2         | 35A | 32.5  | 86.88 | 2.16 | MultipleMeltPeaks                        |
| pmrA          | 35A | 20.23 | 79.73 | 2.07 |                                          |
| pncA          | 35A | 24.91 | 89.2  | 1.91 |                                          |
| putative mul1 | 35A |       |       |      | NoAmplification                          |
| qac           | 35A | 35.26 | 78.78 | 1.95 |                                          |
| qacA          | 35A |       |       |      | NoAmplification                          |
| qacA/qacB     | 35A |       |       |      | NoAmplification                          |
| qacEdelta1-0  | 35A |       |       |      | NoAmplification                          |
| qacEdelta1-0  | 35A | 31.16 | 85.72 | 1.97 | MultipleMeltPeaks                        |
| qacH-01       | 35A | 34.36 | 88.07 | 1.94 |                                          |
| qacH-02       | 35A | 40.24 | 61.63 | 1.68 | MultipleMeltPeaks                        |
| qnrA          | 35A | 36.77 | 89.93 | 1.8  |                                          |

|              |     |       |       |      |                              |
|--------------|-----|-------|-------|------|------------------------------|
| rarD-02      | 35A | 41.37 | 83.85 | 1.68 | MultipleMeltPeaks            |
| sat4         | 35A | 25.2  | 74.94 | 1.99 |                              |
| sdeB         | 35A |       |       |      | LowEfficiency, CtIsSmall, S: |
| spcN-01      | 35A | 40.21 | 61.85 | 1.67 | MultipleMeltPeaks            |
| speA         | 35A |       |       |      | NoAmplification              |
| str          | 35A |       |       |      | CurveFitFailed               |
| strA         | 35A |       |       |      | NoAmplification              |
| strB         | 35A |       |       |      | NoAmplification              |
| sul1         | 35A |       |       |      | NoAmplification              |
| sul2         | 35A | 28.13 | 85.64 | 2    |                              |
| sulA/foIP-01 | 35A | 18.98 | 82.25 | 1.98 |                              |
| sulA/foIP-03 | 35A | 19.63 | 84.06 | 1.99 |                              |
| tet(32)      | 35A | 28.53 | 81.09 | 1.99 |                              |
| tet(34)      | 35A | 32.67 | 75.45 | 2.03 |                              |
| tet(35)      | 35A |       |       |      | NoAmplification              |
| tet(36)-A    | 35A |       |       |      | CurveFitFailed               |
| tet(36)-B    | 35A |       |       |      | NoAmplification              |
| tet(37)      | 35A | 32.74 | 85.24 | 1.93 |                              |
| tetA-01      | 35A | 31    | 85.08 | 1.93 |                              |
| tetA-02      | 35A | 36.46 | 88.39 | 1.81 | MultipleMeltPeaks            |
| tetB-01      | 35A | 29.77 | 79.33 | 1.98 | MultipleMeltPeaks            |
| tetB-02      | 35A | 36.91 | 77.63 | 1.83 |                              |
| tetC-01      | 35A |       |       |      | NoAmplification              |
| tetC-02      | 35A | 27.24 | 76.06 | 2.01 |                              |
| tetD-01      | 35A |       |       |      | NoAmplification              |
| tetD-02      | 35A | 35.56 | 92.37 | 1.73 |                              |
| tetE         | 35A | 33.5  | 88.36 | 1.89 |                              |
| tetG-01      | 35A | 35.56 | 89.07 | 1.83 |                              |
| tetG-02      | 35A | 30.34 | 89.47 | 1.96 |                              |
| tetH         | 35A | 39.33 | 86.1  | 1.73 |                              |
| tetJ         | 35A |       |       |      | NoAmplification              |
| tetK         | 35A | 30.14 | 72.39 | 2    |                              |
| tetL-01      | 35A |       |       |      | NoAmplification              |
| tetL-02      | 35A | 37.53 | 85.3  | 1.65 |                              |
| tetM-01      | 35A | 19.09 | 76.2  | 2    |                              |
| tetM-02      | 35A | 19.13 | 77.73 | 2.02 |                              |
| tetO-01      | 35A |       |       |      | CurveFitFailed               |
| tetPA        | 35A |       |       |      | NoAmplification              |
| tetPB-01     | 35A | 35.69 | 85.88 | 1.86 | MultipleMeltPeaks            |
| tetPB-02     | 35A | 29.84 | 83.31 | 2    | MultipleMeltPeaks            |
| tetPB-03     | 35A |       |       |      | NoAmplification              |
| tetPB-05     | 35A |       |       |      | NoAmplification              |
| tetQ         | 35A | 25.81 | 76    | 2.01 |                              |
| tetR-02      | 35A | 29.98 | 89.85 | 1.87 |                              |
| tetR-03      | 35A |       |       |      | NoAmplification              |
| tetS         | 35A | 31.12 | 86.87 | 2.11 | MultipleMeltPeaks            |

|             |     |       |       |      |                             |
|-------------|-----|-------|-------|------|-----------------------------|
| tetT        | 35A |       |       |      | NoAmplification             |
| tetU-01     | 35A |       |       |      | NoAmplification             |
| tetV        | 35A |       |       |      | CurveFitFailed              |
| tetW-01     | 35A | 24.9  | 81.72 | 2    |                             |
| tetX        | 35A |       |       |      | NoAmplification             |
| tnpA-01     | 35A |       |       |      | CurveFitFailed              |
| tnpA-02     | 35A | 36.01 | 89.37 | 1.73 |                             |
| tnpA-03     | 35A | 31.59 | 77.49 | 2.06 |                             |
| tnpA-04     | 35A | 33.83 | 84.41 | 1.9  |                             |
| tnpA-05     | 35A |       |       |      | CurveFitFailed              |
| tnpA-07     | 35A |       |       |      | NoAmplification             |
| tolC-01     | 35A | 38.61 | 75.25 | 1.75 | MultipleMeltPeaks           |
| tolC-02     | 35A | 34.25 | 77.5  | 1.89 | MultipleMeltPeaks           |
| tolC-03     | 35A | 32.35 | 85.28 | 1.9  | MultipleMeltPeaks           |
| Tp614       | 35A |       |       |      | CurveFitFailed              |
| ttgA        | 35A |       |       |      | LowEfficiency, CurveFitFail |
| ttgB        | 35A | 35.27 | 79.13 | 2.34 |                             |
| vanA        | 35A |       |       |      | NoAmplification             |
| vanB-01     | 35A |       |       |      | CurveFitFailed              |
| vanC-01     | 35A |       |       |      | NoAmplification             |
| vanC-02     | 35A |       |       |      | NoAmplification             |
| vanC-03     | 35A | 25.31 | 88.34 | 1.99 | MultipleMeltPeaks           |
| vanC1       | 35A |       |       |      | NoAmplification             |
| vanC2/vanC3 | 35A | 36.83 | 82.7  | 1.79 |                             |
| vanG        | 35A |       |       |      | NoAmplification             |
| vanHB       | 35A | 36.17 | 88.69 | 1.76 | MultipleMeltPeaks           |
| vanHD       | 35A | 34.7  | 89.66 | 1.83 | MultipleMeltPeaks           |
| vanRA-01    | 35A |       |       |      | NoAmplification             |
| vanRA-02    | 35A |       |       |      | NoAmplification             |
| vanRB       | 35A | 34.86 | 87.43 | 1.87 |                             |
| vanRC       | 35A |       |       |      | CurveFitFailed              |
| vanRC4      | 35A |       |       |      | NoAmplification             |
| vanRD       | 35A |       |       |      | NoAmplification             |
| vanSA       | 35A |       |       |      | NoAmplification             |
| vanSB       | 35A | 29.69 | 74.36 | 2.03 |                             |
| vanSC-01    | 35A |       |       |      | CurveFitFailed              |
| vanSC-02    | 35A |       |       |      | NoAmplification             |
| vanTC-01    | 35A |       |       |      | NoAmplification             |
| vanTC-02    | 35A | 29.68 | 88.48 | 1.82 |                             |
| vanTE       | 35A |       |       |      | NoAmplification             |
| vanTG       | 35A |       |       |      | NoAmplification             |
| vanWB       | 35A |       |       |      | NoAmplification             |
| vanWG       | 35A | 33.47 | 75.15 | 1.99 |                             |
| vanXA       | 35A |       |       |      | CurveFitFailed              |
| vanXB       | 35A |       |       |      | NoAmplification             |
| vanXD       | 35A | 29.92 | 75.44 | 2.06 |                             |

|              |     |       |       |      |                              |
|--------------|-----|-------|-------|------|------------------------------|
| vanYB        | 35A | 36.47 | 84.29 | 1.84 | MultipleMeltPeaks            |
| vanYD-01     | 35A | 31.34 | 81.66 | 1.82 |                              |
| vanYD-02     | 35A |       |       |      | NoAmplification              |
| vatB-01      | 35A | 32.41 | 75.06 | 2.03 |                              |
| vatB-02      | 35A |       |       |      | CurveFitFailed               |
| vatC-01      | 35A |       |       |      | CurveFitFailed               |
| vatC-02      | 35A |       |       |      | LowEfficiency, CtIsSmall, S: |
| vatE-01      | 35A | 30.07 | 76.64 | 2.11 |                              |
| vatE-02      | 35A |       |       |      | NoAmplification              |
| vgaA-01      | 35A |       |       |      | CurveFitFailed               |
| vgaA-02      | 35A |       |       |      | NoAmplification              |
| vgb-01       | 35A | 38.48 | 82.53 | 1.78 | MultipleMeltPeaks            |
| vgbB-01      | 35A |       |       |      | NoAmplification              |
| vgbB-02      | 35A |       |       |      | NoAmplification              |
| yceE/mdtG-0  | 35A |       |       |      | NoAmplification              |
| yceE/mdtG-0  | 35A |       |       |      | NoAmplification              |
| yceL/mdtH-0  | 35A | 28.55 | 84.52 | 1.96 | MultipleMeltPeaks            |
| yceL/mdtH-0  | 35A |       |       |      | NoAmplification              |
| yceL/mdtH-0  | 35A | 34.06 | 89.15 | 1.8  |                              |
| yidY/mdtL-01 | 35A | 33.2  | 75.84 | 1.95 |                              |
| yidY/mdtL-02 | 35A | 36.17 | 86.73 | 1.86 |                              |































| Assay          | Sample | Ct | Tm    | Efficiency | flag                   |
|----------------|--------|----|-------|------------|------------------------|
| 16S rRNA       | 35B    |    | 14.56 | 81.98      | 2.07                   |
| aac            | 35B    |    | 30    | 81.99      | 1.93 MultipleMeltPeaks |
| aac(6')-Ib(akz | 35B    |    | 33.54 | 83.92      | 1.91                   |
| aac(6')-Ib(akz | 35B    |    | 30.11 | 82.41      | 1.98                   |
| aac(6')-Ib(akz | 35B    |    | 30.99 | 80.24      | 1.98 MultipleMeltPeaks |
| aac(6')-II     | 35B    |    | 31.55 | 87.84      | 2                      |
| aac(6')I1      | 35B    |    | 33.19 | 89.3       | 1.96                   |
| aacA/aphD      | 35B    |    |       |            | CurveFitFailed         |
| aacC           | 35B    |    | 25.69 | 89.04      | 1.83 MultipleMeltPeaks |
| aacC1          | 35B    |    | 35.28 | 83.86      | 1.89 MultipleMeltPeaks |
| aacC2          | 35B    |    | 35.98 | 84.43      | 1.86 MultipleMeltPeaks |
| aacC4          | 35B    |    | 29.5  | 90.4       | 1.99                   |
| aadA-01        | 35B    |    |       |            | CurveFitFailed         |
| aadA-02        | 35B    |    | 36.45 | 76.92      | 1.91                   |
| aadA-1-01      | 35B    |    | 27.09 | 79.77      | 1.91                   |
| aadA-1-02      | 35B    |    | 25.92 | 76.42      | 2.01                   |
| aadA1          | 35B    |    | 33    | 84.22      | 2.1                    |
| aadA2-01       | 35B    |    |       |            | CurveFitFailed         |
| aadA2-02       | 35B    |    | 30.5  | 75.12      | 2.05                   |
| aadA2-03       | 35B    |    |       |            | CurveFitFailed         |
| aadA5-01       | 35B    |    | 32.7  | 84.34      | 1.95                   |
| aadA5-02       | 35B    |    | 31.84 | 88.44      | 1.97 MultipleMeltPeaks |
| aadA9-01       | 35B    |    | 32.67 | 88.25      | 1.84                   |
| aadA9-02       | 35B    |    | 31.38 | 83.73      | 1.9                    |
| aadD           | 35B    |    |       |            | CurveFitFailed         |
| aadE           | 35B    |    | 25.18 | 72.07      | 2.08                   |
| acrA-01        | 35B    |    | 23.4  | 82.92      | 1.94 MultipleMeltPeaks |
| acrA-02        | 35B    |    | 32.09 | 84.73      | 1.93 MultipleMeltPeaks |
| acrA-03        | 35B    |    | 33.32 | 90.08      | 1.87                   |
| acrA-04        | 35B    |    | 30.27 | 90.97      | 1.98 MultipleMeltPeaks |
| acrA-05        | 35B    |    | 25.86 | 92.29      | 1.87                   |
| acrB-01        | 35B    |    | 33.13 | 85.47      | 2.02                   |
| acrF           | 35B    |    | 28.62 | 82.81      | 1.87                   |
| acrR-01        | 35B    |    | 33.18 | 92.3       | 1.82                   |
| acrR-02        | 35B    |    | 36.36 | 85.16      | 1.73                   |
| Actin          | 35B    |    | 21.32 | 86.8       | 1.97                   |
| adeA           | 35B    |    | 37.07 | 85.67      | 1.76 MultipleMeltPeaks |
| ampC-01        | 35B    |    | 30.3  | 88.75      | 1.94 MultipleMeltPeaks |
| ampC-02        | 35B    |    | 35.23 | 89.59      | 1.91 MultipleMeltPeaks |
| ampC-04        | 35B    |    | 31.17 | 78.29      | 1.61 MultipleMeltPeaks |
| ampC-05        | 35B    |    | 37.19 | 89.86      | 1.7 MultipleMeltPeaks  |
| ampC-06        | 35B    |    | 37.92 | 80.57      | 1.82 MultipleMeltPeaks |
| ampC-07        | 35B    |    | 34.83 | 88.07      | 1.86                   |
| ampC-09        | 35B    |    | 35.87 | 88.14      | 1.77 MultipleMeltPeaks |
| ampC/blaDH     | 35B    |    | 29.81 | 86         | 1.98 MultipleMeltPeaks |

|               |     |       |       |      |                              |
|---------------|-----|-------|-------|------|------------------------------|
| aph           | 35B |       |       |      | LowEfficiency, CtIsSmall, S: |
| aph(2')-Id-01 | 35B |       |       |      | LowEfficiency, CtIsSmall, S: |
| aph(2')-Id-02 | 35B |       |       |      | LowEfficiency, CtIsSmall, S: |
| aph6ia        | 35B | 35.86 | 79.03 | 1.92 |                              |
| aphA1(aka k   | 35B | 27.22 | 76.61 | 2.08 |                              |
| bacA-01       | 35B | 36.64 | 72.91 | 1.85 | MultipleMeltPeaks            |
| bacA-02       | 35B | 30.68 | 83.4  | 1.79 | MultipleMeltPeaks            |
| BETA-globin   | 35B | 23.02 | 83.96 | 2    |                              |
| bla-ACC-1     | 35B | 37.55 | 80.28 | 1.83 | MultipleMeltPeaks            |
| bla-L1        | 35B | 28.87 | 85.58 | 2    |                              |
| bla1          | 35B |       |       |      | LowEfficiency, CtIsSmall, S: |
| blaCMY        | 35B |       |       |      | CurveFitFailed               |
| blaCMY2-01    | 35B | 36.53 | 79.54 | 1.98 |                              |
| blaCMY2-02    | 35B | 28.64 | 85.18 | 1.97 |                              |
| blaCTX-M-01   | 35B | 31.93 | 81.26 | 1.48 | MultipleMeltPeaks            |
| blaCTX-M-02   | 35B | 33.46 | 88.89 | 1.91 |                              |
| blaCTX-M-03   | 35B |       |       |      | CurveFitFailed               |
| blaCTX-M-04   | 35B | 30.75 | 88.07 | 1.97 |                              |
| blaCTX-M-05   | 35B | 32.65 | 76.29 | 1.75 |                              |
| blaCTX-M-06   | 35B |       |       |      | CurveFitFailed               |
| blaGES        | 35B |       |       |      | CurveFitFailed               |
| blaIMP-01     | 35B |       |       |      | LowEfficiency, CtIsSmall, C: |
| blaIMP-02     | 35B |       |       |      | CurveFitFailed               |
| blaMOX/blaC   | 35B | 36.68 | 80.85 | 1.96 | MultipleMeltPeaks            |
| blaOCH        | 35B | 29.77 | 88.93 | 2.31 | MultipleMeltPeaks            |
| blaOKP        | 35B |       |       |      | NoAmplification              |
| blaOXA1/blaC  | 35B |       |       |      | CurveFitFailed               |
| blaOXA10-01   | 35B |       |       |      | LowEfficiency, CtIsSmall, S: |
| blaOXA10-02   | 35B |       |       |      | CurveFitFailed               |
| blaOXY        | 35B | 32.28 | 88.74 | 1.88 | MultipleMeltPeaks            |
| blaPAO        | 35B | 38.18 | 88.97 | 1.72 | MultipleMeltPeaks            |
| blaPER        | 35B |       |       |      | CurveFitFailed               |
| blaPSE        | 35B | 40.5  | 87.04 | 1.51 | MultipleMeltPeaks            |
| blaROB        | 35B | 32.26 | 89.91 | 1.76 |                              |
| blaSFO        | 35B | 30.95 | 91.41 | 1.94 | MultipleMeltPeaks            |
| blaSHV-01     | 35B | 32.24 | 89.08 | 1.83 |                              |
| blaSHV-02     | 35B |       |       |      | CurveFitFailed               |
| blaTEM        | 35B | 24.38 | 79.13 | 1.94 |                              |
| blaTLA        | 35B |       |       |      | LowEfficiency, CtIsSmall, S: |
| blaVEB        | 35B |       |       |      | LowEfficiency, CtIsSmall, S: |
| blaVIM        | 35B | 36.58 | 88.94 | 1.85 | MultipleMeltPeaks            |
| blaZ          | 35B |       |       |      | LowEfficiency, CtIsSmall, S: |
| carB          | 35B | 33.9  | 85.99 | 1.92 |                              |
| catA1         | 35B |       |       |      | NoAmplification              |
| catB3         | 35B | 37.17 | 80    | 1.84 |                              |
| catB8         | 35B | 29.63 | 81.99 | 1.98 |                              |

|            |     |       |       |      |                              |
|------------|-----|-------|-------|------|------------------------------|
| ceoA       | 35B | 28.4  | 81.97 | 1.95 | MultipleMeltPeaks            |
| cepA       | 35B |       |       |      | LowEfficiency, CtIsSmall, S: |
| cfiA       | 35B | 32.92 | 88.5  | 1.93 | MultipleMeltPeaks            |
| cfr        | 35B |       |       |      | LowEfficiency, CtIsSmall, S: |
| cfxA       | 35B | 21.42 | 77.55 | 2.02 |                              |
| cmeA       | 35B |       |       |      | NoAmplification              |
| cmlA1-01   | 35B | 35.27 | 91.64 | 1.88 | MultipleMeltPeaks            |
| cmlA1-02   | 35B | 35.22 | 88.42 | 1.77 | MultipleMeltPeaks            |
| cmr        | 35B |       |       |      | CurveFitFailed               |
| cmx(A)     | 35B | 26.52 | 86.61 | 2.01 | MultipleMeltPeaks            |
| cphA-01    | 35B | 32.15 | 85.63 | 1.89 | MultipleMeltPeaks            |
| cphA-02    | 35B | 34.18 | 82.36 | 1.98 |                              |
| dfrA1      | 35B |       |       |      | NoAmplification              |
| dfrA12     | 35B |       |       |      | CurveFitFailed               |
| emrD       | 35B | 30.7  | 88.83 | 1.95 |                              |
| ereA       | 35B |       |       |      | CurveFitFailed               |
| ereB       | 35B | 34.71 | 86.29 | 1.89 |                              |
| erm(34)    | 35B | 33.65 | 82.2  | 1.84 | MultipleMeltPeaks            |
| erm(35)    | 35B |       |       |      | LowEfficiency, CtIsSmall, S: |
| erm(36)    | 35B | 29.56 | 85.56 | 2.13 |                              |
| ermA       | 35B |       |       |      | LowEfficiency, CtIsSmall, S: |
| ermA/ermTR | 35B |       |       |      | NoAmplification              |
| ermB       | 35B | 22.92 | 74.86 | 2.12 |                              |
| ermC       | 35B |       |       |      | CurveFitFailed               |
| ermF       | 35B | 25.92 | 74.55 | 2.02 |                              |
| ermJ/ermD  | 35B |       |       |      | LowEfficiency, CtIsSmall, S: |
| ermK-01    | 35B | 37.89 | 78.89 | 1.97 | MultipleMeltPeaks            |
| ermK-02    | 35B | 37.06 | 85.6  | 1.72 | MultipleMeltPeaks            |
| ermT-01    | 35B |       |       |      | LowEfficiency, CtIsSmall, S: |
| ermT-02    | 35B | 37.76 | 78.65 | 1.86 |                              |
| ermX       | 35B | 28.48 | 83.14 | 1.87 |                              |
| ermY       | 35B | 34.75 | 87.88 | 1.9  | MultipleMeltPeaks            |
| fabK       | 35B | 20.43 | 79.63 | 2.27 |                              |
| floR       | 35B | 31.6  | 89.53 | 1.98 |                              |
| folA       | 35B |       |       |      | NoAmplification              |
| fosB       | 35B |       |       |      | LowEfficiency, CtIsSmall, S: |
| fosX       | 35B |       |       |      | LowEfficiency, CtIsSmall, S: |
| fox5       | 35B | 26.54 | 86.57 | 1.96 |                              |
| imiR       | 35B |       |       |      | LowEfficiency, CtIsSmall, S: |
| ImrA-01    | 35B | 35.5  | 80.99 | 1.89 |                              |
| intl       | 35B | 29.42 | 90.06 | 2    |                              |
| intl1      | 35B | 20.22 | 87.05 | 2.03 |                              |
| IS613      | 35B | 21.87 | 79.65 | 2.08 |                              |
| lnuA-01    | 35B |       |       |      | CurveFitFailed               |
| lnuB-01    | 35B |       |       |      | LowEfficiency, CtIsSmall, S: |
| lnuB-02    | 35B |       |       |      | CurveFitFailed               |

|               |     |       |       |      |                             |
|---------------|-----|-------|-------|------|-----------------------------|
| lnuC          | 35B | 35.07 | 87.6  | 1.81 | MultipleMeltPeaks           |
| marR-01       | 35B | 32.79 | 89.51 | 1.93 |                             |
| matA/mel      | 35B | 18.23 | 77.59 | 2.1  |                             |
| mdet1         | 35B |       |       |      | LowEfficiency, CtIsSmall, C |
| mdtA          | 35B | 38.33 | 85.46 | 1.66 | MultipleMeltPeaks           |
| mdtE/yhiU     | 35B | 31.63 | 90.8  | 1.88 |                             |
| mecA          | 35B |       |       |      | LowEfficiency, CtIsSmall, S |
| mefA          | 35B | 17.61 | 80.47 | 2    |                             |
| mepA          | 35B | 31.42 | 86.08 | 2.05 | MultipleMeltPeaks           |
| mexA          | 35B | 36.27 | 88.95 | 1.81 | MultipleMeltPeaks           |
| mexD          | 35B | 32.48 | 80.11 | 2.03 |                             |
| mexE          | 35B | 31.76 | 87.64 | 1.92 | MultipleMeltPeaks           |
| mexF          | 35B | 26.69 | 87.76 | 2    |                             |
| mphA-01       | 35B | 28.57 | 91.31 | 2.02 | MultipleMeltPeaks           |
| mphA-02       | 35B | 27.75 | 87.3  | 1.82 |                             |
| mphB          | 35B | 37.58 | 77.87 | 1.78 |                             |
| mphC          | 35B |       |       |      | CurveFitFailed              |
| msrA-01       | 35B |       |       |      | CurveFitFailed              |
| msrC-01       | 35B |       |       |      | NoAmplification             |
| mtrC-01       | 35B | 34.72 | 89.84 | 1.85 |                             |
| mtrC-02       | 35B | 35.09 | 84.2  | 1.96 |                             |
| mtrD-02       | 35B | 27.43 | 81.28 | 2.01 |                             |
| mtrD-03       | 35B | 28.17 | 87.87 | 1.84 | MultipleMeltPeaks           |
| NDM1          | 35B |       |       |      | CurveFitFailed              |
| nimE          | 35B |       |       |      | CurveFitFailed              |
| nisB          | 35B | 34.7  | 81.96 | 1.92 |                             |
| oleC          | 35B | 32.39 | 88.6  | 1.95 | MultipleMeltPeaks           |
| oprD          | 35B | 27.25 | 87.25 | 1.99 |                             |
| oprJ          | 35B | 27.13 | 91.1  | 1.95 |                             |
| pbp           | 35B | 33.32 | 87.1  | 1.92 |                             |
| pbp2x         | 35B | 22.74 | 75.69 | 2.01 |                             |
| Pbp5          | 35B |       |       |      | LowEfficiency, CtIsSmall, S |
| penA          | 35B | 33.53 | 91.89 | 1.85 | MultipleMeltPeaks           |
| pikR1         | 35B | 29.94 | 89.14 | 1.95 |                             |
| pikR2         | 35B | 29.18 | 85.15 | 2.05 |                             |
| pmrA          | 35B | 19.96 | 79.51 | 2.14 |                             |
| pncA          | 35B | 25.93 | 89.26 | 1.92 |                             |
| putative mult | 35B |       |       |      | CurveFitFailed              |
| qac           | 35B |       |       |      | CurveFitFailed              |
| qacA          | 35B |       |       |      | LowEfficiency, CtIsSmall, S |
| qacA/qacB     | 35B |       |       |      | CurveFitFailed              |
| qacEdelta1-0  | 35B |       |       |      | LowEfficiency, CtIsSmall, S |
| qacEdelta1-0  | 35B | 32.06 | 86.31 | 1.93 |                             |
| qacH-01       | 35B | 31.2  | 87.85 | 1.84 |                             |
| qacH-02       | 35B | 34.68 | 75.51 | 1.82 | MultipleMeltPeaks           |
| qnrA          | 35B |       |       |      | CurveFitFailed              |



|              |     |       |       |      |                                          |
|--------------|-----|-------|-------|------|------------------------------------------|
| rarD-02      | 35B | 41.83 | 83.82 | 1.66 | MultipleMeltPeaks                        |
| sat4         | 35B | 24.97 | 74.97 | 2    |                                          |
| sdeB         | 35B |       |       |      | CurveFitFailed                           |
| spcN-01      | 35B | 36.59 | 90.38 | 1.91 | MultipleMeltPeaks                        |
| speA         | 35B |       |       |      | NoAmplification                          |
| str          | 35B |       |       |      | LowEfficiency, CtIsSmall, S <sub>c</sub> |
| strA         | 35B |       |       |      | LowEfficiency, CtIsSmall, S <sub>c</sub> |
| strB         | 35B | 27.81 | 83.89 | 1.93 |                                          |
| sul1         | 35B | 33.78 | 89.8  | 1.86 |                                          |
| sul2         | 35B | 28.31 | 85.69 | 2    |                                          |
| sulA/foIP-01 | 35B | 18.91 | 81.82 | 2.03 |                                          |
| sulA/foIP-03 | 35B | 19.47 | 83.59 | 2.04 |                                          |
| tet(32)      | 35B | 27.29 | 81.14 | 1.97 |                                          |
| tet(34)      | 35B | 32.31 | 75.47 | 2.01 |                                          |
| tet(35)      | 35B | 37.6  | 75.57 | 1.93 | MultipleMeltPeaks                        |
| tet(36)-A    | 35B | 34.08 | 81.88 | 1.94 |                                          |
| tet(36)-B    | 35B |       |       |      | LowEfficiency, CtIsSmall, S <sub>c</sub> |
| tet(37)      | 35B | 33.69 | 82.64 | 1.93 | MultipleMeltPeaks                        |
| tetA-01      | 35B | 31.6  | 85.04 | 1.93 |                                          |
| tetA-02      | 35B | 31.04 | 84.1  | 1.95 |                                          |
| tetB-01      | 35B | 24.18 | 79.66 | 1.98 |                                          |
| tetB-02      | 35B | 23.56 | 79.73 | 2.02 |                                          |
| tetC-01      | 35B | 24.31 | 75.24 | 1.97 |                                          |
| tetC-02      | 35B | 24.22 | 76.12 | 2.07 |                                          |
| tetD-01      | 35B |       |       |      | LowEfficiency, CtIsSmall, S <sub>c</sub> |
| tetD-02      | 35B | 32.75 | 91.87 | 1.72 |                                          |
| tetE         | 35B |       |       |      | CurveFitFailed                           |
| tetG-01      | 35B | 30.56 | 85.72 | 2.21 | MultipleMeltPeaks                        |
| tetG-02      | 35B | 32.42 | 89.68 | 1.99 |                                          |
| tetH         | 35B |       |       |      | CurveFitFailed                           |
| tetJ         | 35B |       |       |      | LowEfficiency, CtIsSmall, S <sub>c</sub> |
| tetK         | 35B |       |       |      | CurveFitFailed                           |
| tetL-01      | 35B |       |       |      | CurveFitFailed                           |
| tetL-02      | 35B | 33.9  | 84.83 | 1.89 | MultipleMeltPeaks                        |
| tetM-01      | 35B | 19.41 | 76.05 | 2.03 |                                          |
| tetM-02      | 35B | 19.41 | 77.62 | 2.09 |                                          |
| tetO-01      | 35B |       |       |      | LowEfficiency, CtIsSmall, S <sub>c</sub> |
| tetPA        | 35B |       |       |      | LowEfficiency, CtIsSmall, C <sub>i</sub> |
| tetPB-01     | 35B | 33.1  | 86.02 | 1.89 | MultipleMeltPeaks                        |
| tetPB-02     | 35B | 27.33 | 84.29 | 2.07 |                                          |
| tetPB-03     | 35B |       |       |      | LowEfficiency, CtIsSmall, S <sub>c</sub> |
| tetPB-05     | 35B |       |       |      | LowEfficiency, CtIsSmall, S <sub>c</sub> |
| tetQ         | 35B | 27.19 | 75.91 | 2.02 |                                          |
| tetR-02      | 35B | 28.6  | 89.53 | 1.95 |                                          |
| tetR-03      | 35B | 23.88 | 76.19 | 2.02 |                                          |
| tetS         | 35B | 33.04 | 86.51 | 2.25 | MultipleMeltPeaks                        |

|             |     |       |       |      |                                          |
|-------------|-----|-------|-------|------|------------------------------------------|
| tetT        | 35B |       |       |      | CurveFitFailed                           |
| tetU-01     | 35B | 34.56 | 89.37 | 1.91 |                                          |
| tetV        | 35B |       |       |      | LowEfficiency, CtIsSmall, S <sub>c</sub> |
| tetW-01     | 35B | 23.26 | 81.92 | 2.01 |                                          |
| tetX        | 35B |       |       |      | LowEfficiency, CtIsSmall, C <sub>i</sub> |
| tnpA-01     | 35B | 32.53 | 79.5  | 2    |                                          |
| tnpA-02     | 35B | 31.6  | 84.42 | 1.85 |                                          |
| tnpA-03     | 35B | 36.66 | 73.19 | 1.92 | MultipleMeltPeaks                        |
| tnpA-04     | 35B | 31.5  | 84.44 | 1.91 |                                          |
| tnpA-05     | 35B |       |       |      | LowEfficiency, CtIsSmall, C <sub>i</sub> |
| tnpA-07     | 35B |       |       |      | LowEfficiency, CtIsSmall, S <sub>c</sub> |
| tolC-01     | 35B | 31.07 | 81.4  | 1.94 |                                          |
| tolC-02     | 35B | 30.13 | 85.47 | 1.96 |                                          |
| tolC-03     | 35B | 30.66 | 85.28 | 1.97 | MultipleMeltPeaks                        |
| Tp614       | 35B | 35.72 | 84.7  | 1.91 |                                          |
| ttgA        | 35B | 36.22 | 87.75 | 1.83 | MultipleMeltPeaks                        |
| ttgB        | 35B |       |       |      | CurveFitFailed                           |
| vanA        | 35B |       |       |      | LowEfficiency, CtIsSmall, S <sub>c</sub> |
| vanB-01     | 35B | 31.13 | 84.09 | 1.86 |                                          |
| vanC-01     | 35B |       |       |      | LowEfficiency, CtIsSmall, C <sub>i</sub> |
| vanC-02     | 35B |       |       |      | CurveFitFailed                           |
| vanC-03     | 35B | 23.98 | 88.35 | 2    | MultipleMeltPeaks                        |
| vanC1       | 35B |       |       |      | CurveFitFailed                           |
| vanC2/vanC3 | 35B | 33.32 | 80.41 | 2.12 | MultipleMeltPeaks                        |
| vanG        | 35B |       |       |      | CurveFitFailed                           |
| vanHB       | 35B | 31.84 | 88.97 | 1.99 |                                          |
| vanHD       | 35B | 36.57 | 86.82 | 1.78 | MultipleMeltPeaks                        |
| vanRA-01    | 35B |       |       |      | CurveFitFailed                           |
| vanRA-02    | 35B |       |       |      | CurveFitFailed                           |
| vanRB       | 35B | 33.69 | 85.5  | 1.99 |                                          |
| vanRC       | 35B |       |       |      | CurveFitFailed                           |
| vanRC4      | 35B |       |       |      | CurveFitFailed                           |
| vanRD       | 35B |       |       |      | CurveFitFailed                           |
| vanSA       | 35B |       |       |      | CurveFitFailed                           |
| vanSB       | 35B | 34.47 | 73.98 | 1.89 |                                          |
| vanSC-01    | 35B |       |       |      | CurveFitFailed                           |
| vanSC-02    | 35B |       |       |      | NoAmplification                          |
| vanTC-01    | 35B |       |       |      | LowEfficiency, CtIsSmall, S <sub>c</sub> |
| vanTC-02    | 35B | 31.71 | 86.44 | 1.93 |                                          |
| vanTE       | 35B | 37.29 | 88.83 | 1.8  |                                          |
| vanTG       | 35B | 36.86 | 87.8  | 1.92 | MultipleMeltPeaks                        |
| vanWB       | 35B |       |       |      | LowEfficiency, CtIsSmall, S <sub>c</sub> |
| vanWG       | 35B | 36.68 | 73.54 | 1.91 | MultipleMeltPeaks                        |
| vanXA       | 35B |       |       |      | CurveFitFailed                           |
| vanXB       | 35B |       |       |      | NoAmplification                          |
| vanXD       | 35B | 29.97 | 75.14 | 2.07 |                                          |

|              |     |       |       |                              |
|--------------|-----|-------|-------|------------------------------|
| vanYB        | 35B | 35.69 | 82.75 | 1.93 MultipleMeltPeaks       |
| vanYD-01     | 35B | 32.47 | 81.65 | 1.79                         |
| vanYD-02     | 35B | 38.28 | 74.33 | 1.95                         |
| vatB-01      | 35B |       |       | LowEfficiency, CtIsSmall, Ci |
| vatB-02      | 35B |       |       | CurveFitFailed               |
| vatC-01      | 35B | 36.64 | 81.74 | 1.88 MultipleMeltPeaks       |
| vatC-02      | 35B |       |       | CurveFitFailed               |
| vatE-01      | 35B | 30.04 | 75.85 | 2.1                          |
| vatE-02      | 35B |       |       | CurveFitFailed               |
| vgaA-01      | 35B | 37.78 | 79.87 | 1.9 MultipleMeltPeaks        |
| vgaA-02      | 35B |       |       | LowEfficiency, CtIsSmall, S: |
| vgb-01       | 35B | 30.85 | 87.54 | 1.96                         |
| vgbB-01      | 35B |       |       | CurveFitFailed               |
| vgbB-02      | 35B |       |       | LowEfficiency, CtIsSmall, S: |
| yceE/mdtG-0  | 35B |       |       | CurveFitFailed               |
| yceE/mdtG-0  | 35B |       |       | BadR2, LowEfficiency, CtIsS  |
| yceL/mdtH-0  | 35B | 27.96 | 89.28 | 1.96 MultipleMeltPeaks       |
| yceL/mdtH-0  | 35B |       |       | LowEfficiency, CtIsSmall, S: |
| yceL/mdtH-0  | 35B | 30.62 | 76.05 | 1.98 MultipleMeltPeaks       |
| yidY/mdtL-01 | 35B | 31.89 | 82.28 | 1.98 MultipleMeltPeaks       |
| yidY/mdtL-02 | 35B |       |       | CurveFitFailed               |































| Assay          | Sample | Ct | Tm    | Efficiency | flag                         |
|----------------|--------|----|-------|------------|------------------------------|
| 16S rRNA       | 35C    |    | 13.85 | 82.34      | 2.02                         |
| aac            | 35C    |    | 30.27 | 88.28      | 1.96                         |
| aac(6')-Ib(akz | 35C    |    |       |            | NoAmplification              |
| aac(6')-Ib(akz | 35C    |    | 33.36 | 82.83      | 1.96                         |
| aac(6')-Ib(akz | 35C    |    | 34.29 | 78.59      | 1.96                         |
| aac(6')-II     | 35C    |    | 30.3  | 91.1       | 1.92                         |
| aac(6')I1      | 35C    |    | 35.96 | 89.15      | 1.77 MultipleMeltPeaks       |
| aacA/aphD      | 35C    |    |       |            | CurveFitFailed               |
| aacC           | 35C    |    | 28.29 | 86.8       | 1.9 MultipleMeltPeaks        |
| aacC1          | 35C    |    |       |            | NoAmplification              |
| aacC2          | 35C    |    |       |            | NoAmplification              |
| aacC4          | 35C    |    | 31.84 | 90.57      | 1.97                         |
| aadA-01        | 35C    |    |       |            | LowEfficiency, CtIsSmall, S: |
| aadA-02        | 35C    |    | 31.26 | 80.43      | 1.93                         |
| aadA-1-01      | 35C    |    | 23.65 | 79.94      | 1.9                          |
| aadA-1-02      | 35C    |    | 22.76 | 76.5       | 2.01                         |
| aadA1          | 35C    |    | 37.5  | 80.98      | 1.97 MultipleMeltPeaks       |
| aadA2-01       | 35C    |    | 30.03 | 80.69      | 1.9                          |
| aadA2-02       | 35C    |    | 33.69 | 75.11      | 2.02                         |
| aadA2-03       | 35C    |    | 37.84 | 79.09      | 1.88                         |
| aadA5-01       | 35C    |    | 38.02 | 78.41      | 1.89                         |
| aadA5-02       | 35C    |    | 36.35 | 83.69      | 1.88 MultipleMeltPeaks       |
| aadA9-01       | 35C    |    | 35.77 | 88.16      | 1.73                         |
| aadA9-02       | 35C    |    | 34    | 73.24      | 2.01                         |
| aadD           | 35C    |    |       |            | NoAmplification              |
| aadE           | 35C    |    | 22.83 | 72.09      | 2.09                         |
| acrA-01        | 35C    |    | 26.48 | 82.76      | 1.92 MultipleMeltPeaks       |
| acrA-02        | 35C    |    | 35.17 | 84.91      | 1.88                         |
| acrA-03        | 35C    |    | 37.66 | 88.03      | 1.68                         |
| acrA-04        | 35C    |    | 30.95 | 85.26      | 1.95                         |
| acrA-05        | 35C    |    | 25.49 | 92.34      | 1.93                         |
| acrB-01        | 35C    |    | 38.37 | 86.26      | 1.79 MultipleMeltPeaks       |
| acrF           | 35C    |    | 30.01 | 83.06      | 1.76                         |
| acrR-01        | 35C    |    | 30.09 | 79.3       | 1.93 MultipleMeltPeaks       |
| acrR-02        | 35C    |    |       |            | CurveFitFailed               |
| Actin          | 35C    |    | 20.76 | 87.05      | 1.95                         |
| adeA           | 35C    |    |       |            | NoAmplification              |
| ampC-01        | 35C    |    | 31.58 | 85.52      | 1.92                         |
| ampC-02        | 35C    |    | 34.65 | 89.25      | 1.93                         |
| ampC-04        | 35C    |    | 32.17 | 78.18      | 1.67 MultipleMeltPeaks       |
| ampC-05        | 35C    |    |       |            | LowEfficiency, CtIsSmall, C: |
| ampC-06        | 35C    |    |       |            | LowEfficiency, CtIsSmall, C: |
| ampC-07        | 35C    |    | 37.99 | 88.12      | 1.71                         |
| ampC-09        | 35C    |    |       |            | LowEfficiency, CtIsSmall, C: |
| ampC/blaDH     | 35C    |    | 31.76 | 86.8       | 1.96                         |

|                            |     |       |       |                                          |
|----------------------------|-----|-------|-------|------------------------------------------|
| aph                        | 35C |       |       | NoAmplification                          |
| aph(2')-Id-01              | 35C |       |       | CurveFitFailed                           |
| aph(2')-Id-02              | 35C |       |       | LowEfficiency, CtIsSmall, Ci             |
| aph6ia                     | 35C |       |       | NoAmplification                          |
| aphA1(aka k <sub>a</sub> ) | 35C | 29.26 | 76.77 | 2.06                                     |
| bacA-01                    | 35C |       |       | CurveFitFailed                           |
| bacA-02                    | 35C | 37.66 | 84.72 | 1.78 MultipleMeltPeaks                   |
| BETA-globin                | 35C | 22.29 | 84.12 | 2                                        |
| bla-ACC-1                  | 35C | 38.19 | 75.83 | 1.72 MultipleMeltPeaks                   |
| bla-L1                     | 35C | 30.59 | 86.66 | 1.99                                     |
| bla1                       | 35C |       |       | CurveFitFailed                           |
| blaCMY                     | 35C |       |       | LowEfficiency, CtIsSmall, S <sub>e</sub> |
| blaCMY2-01                 | 35C | 38.32 | 75.06 | 2.02                                     |
| blaCMY2-02                 | 35C | 29.87 | 85.4  | 1.92 MultipleMeltPeaks                   |
| blaCTX-M-01                | 35C | 38.06 | 78.62 | 1.81 MultipleMeltPeaks                   |
| blaCTX-M-02                | 35C | 32.54 | 80.67 | 1.89                                     |
| blaCTX-M-03                | 35C |       |       | LowEfficiency, CtIsSmall, S <sub>e</sub> |
| blaCTX-M-04                | 35C | 33.59 | 87.62 | 1.84                                     |
| blaCTX-M-05                | 35C | 32.17 | 90.61 | 1.59                                     |
| blaCTX-M-06                | 35C |       |       | NoAmplification                          |
| blaGES                     | 35C |       |       | NoAmplification                          |
| blaIMP-01                  | 35C |       |       | NoAmplification                          |
| blaIMP-02                  | 35C |       |       | CurveFitFailed                           |
| blaMOX/blaC                | 35C |       |       | NoAmplification                          |
| blaOCH                     | 35C |       |       | NoAmplification                          |
| blaOKP                     | 35C |       |       | NoAmplification                          |
| blaOXA1/blaC               | 35C |       |       | LowEfficiency, CtIsSmall, S <sub>e</sub> |
| blaOXA10-01                | 35C |       |       | NoAmplification                          |
| blaOXA10-02                | 35C |       |       | CurveFitFailed                           |
| blaOXY                     | 35C | 36.94 | 88.6  | 1.62 MultipleMeltPeaks                   |
| blaPAO                     | 35C | 37.29 | 84.71 | 1.83 MultipleMeltPeaks                   |
| blaPER                     | 35C |       |       | NoAmplification                          |
| blaPSE                     | 35C | 40.72 | 64.79 | 1.47 MultipleMeltPeaks                   |
| blaROB                     | 35C |       |       | NoAmplification                          |
| blaSFO                     | 35C | 30.67 | 83.89 | 1.91 MultipleMeltPeaks                   |
| blaSHV-01                  | 35C |       |       | LowEfficiency, CtIsSmall, Ci             |
| blaSHV-02                  | 35C | 37.11 | 77.47 | 1.88                                     |
| blaTEM                     | 35C | 26.42 | 79.14 | 1.91                                     |
| blaTLA                     | 35C |       |       | LowEfficiency, CtIsSmall, S <sub>e</sub> |
| blaVEB                     | 35C |       |       | NoAmplification                          |
| blaVIM                     | 35C | 44.18 | 65.89 | 1.72 MultipleMeltPeaks                   |
| blaZ                       | 35C | 27.48 | 74.79 | 2.08                                     |
| carB                       | 35C | 30.57 | 90.03 | 1.89                                     |
| catA1                      | 35C |       |       | NoAmplification                          |
| catB3                      | 35C | 31.85 | 87.63 | 1.93                                     |
| catB8                      | 35C | 31.8  | 82.11 | 1.99                                     |

|            |     |       |       |      |                              |
|------------|-----|-------|-------|------|------------------------------|
| ceoA       | 35C | 29.28 | 87.5  | 1.95 | MultipleMeltPeaks            |
| cepA       | 35C |       |       |      | NoAmplification              |
| cfiA       | 35C |       |       |      | NoAmplification              |
| cfr        | 35C |       |       |      | LowEfficiency, CtIsSmall, S: |
| cfxA       | 35C | 20.35 | 77.58 | 1.95 |                              |
| cmeA       | 35C |       |       |      | LowEfficiency, CtIsSmall, S: |
| cmlA1-01   | 35C | 41.55 | 76.37 | 1.69 | MultipleMeltPeaks            |
| cmlA1-02   | 35C | 34.42 | 82.35 | 1.9  |                              |
| cmr        | 35C |       |       |      | LowEfficiency, CtIsSmall, Ci |
| cmx(A)     | 35C | 29.12 | 86.83 | 2.05 |                              |
| cphA-01    | 35C | 33.07 | 87.03 | 1.96 |                              |
| cphA-02    | 35C | 37.8  | 88.58 | 1.83 | MultipleMeltPeaks            |
| dfrA1      | 35C |       |       |      | NoAmplification              |
| dfrA12     | 35C |       |       |      | NoAmplification              |
| emrD       | 35C | 34.98 | 81.91 | 1.78 | MultipleMeltPeaks            |
| ereA       | 35C |       |       |      | CurveFitFailed               |
| ereB       | 35C |       |       |      | CurveFitFailed               |
| erm(34)    | 35C | 35.2  | 88.74 | 1.89 |                              |
| erm(35)    | 35C |       |       |      | LowEfficiency, CtIsSmall, Ci |
| erm(36)    | 35C | 33.24 | 85.8  | 2.12 |                              |
| ermA       | 35C |       |       |      | CurveFitFailed               |
| ermA/ermTR | 35C |       |       |      | NoAmplification              |
| ermB       | 35C | 18.67 | 75.05 | 2.14 |                              |
| ermC       | 35C |       |       |      | LowEfficiency, CtIsSmall, S: |
| ermF       | 35C | 26.82 | 74.5  | 1.99 |                              |
| ermJ/ermD  | 35C |       |       |      | NoAmplification              |
| ermK-01    | 35C | 31.37 | 75.19 | 2    |                              |
| ermK-02    | 35C |       |       |      | NoAmplification              |
| ermT-01    | 35C |       |       |      | CurveFitFailed               |
| ermT-02    | 35C | 34.41 | 71.89 | 2.04 |                              |
| ermX       | 35C | 27.59 | 83.14 | 1.86 |                              |
| ermY       | 35C |       |       |      | NoAmplification              |
| fabK       | 35C | 21.43 | 79.93 | 2.15 |                              |
| floR       | 35C | 33.67 | 85.13 | 1.89 |                              |
| folA       | 35C |       |       |      | NoAmplification              |
| fosB       | 35C |       |       |      | LowEfficiency, CtIsSmall, S: |
| fosX       | 35C |       |       |      | LowEfficiency, CtIsSmall, Ci |
| fox5       | 35C | 28.5  | 85.85 | 1.89 | MultipleMeltPeaks            |
| imiR       | 35C |       |       |      | BadR2, LowEfficiency, CtIsS  |
| ImrA-01    | 35C |       |       |      | CurveFitFailed               |
| intl       | 35C | 31.15 | 84.79 | 1.95 | MultipleMeltPeaks            |
| intl1      | 35C | 20.66 | 87.11 | 2.01 |                              |
| IS613      | 35C | 19.65 | 79.74 | 2.09 |                              |
| lnuA-01    | 35C |       |       |      | LowEfficiency, CtIsSmall, S: |
| lnuB-01    | 35C |       |       |      | LowEfficiency, CtIsSmall, S: |
| lnuB-02    | 35C |       |       |      | CurveFitFailed               |

|                |     |       |       |      |                              |
|----------------|-----|-------|-------|------|------------------------------|
| lnuC           | 35C |       |       |      | LowEfficiency, CtIsSmall, S: |
| marR-01        | 35C | 33.54 | 85.13 | 1.91 | MultipleMeltPeaks            |
| matA/mel       | 35C | 17.36 | 77.68 | 2.09 |                              |
| mdet1          | 35C |       |       |      | NoAmplification              |
| mdtA           | 35C | 38.55 | 81.78 | 1.71 |                              |
| mdtE/yhiU      | 35C | 34.71 | 90.75 | 1.75 |                              |
| mecA           | 35C |       |       |      | NoAmplification              |
| mefA           | 35C | 16.67 | 80.47 | 2.01 | MultipleMeltPeaks            |
| mepA           | 35C | 32.46 | 88.53 | 2.02 |                              |
| mexA           | 35C | 34.73 | 74.62 | 1.96 |                              |
| mexD           | 35C | 40.23 | 79.62 | 1.82 |                              |
| mexE           | 35C | 30.2  | 85.99 | 1.97 | MultipleMeltPeaks            |
| mexF           | 35C | 28.18 | 87.27 | 2.02 |                              |
| mphA-01        | 35C | 30.24 | 89.51 | 2.01 |                              |
| mphA-02        | 35C | 28.6  | 87.35 | 1.83 |                              |
| mphB           | 35C | 31.94 | 82    | 2.03 |                              |
| mphC           | 35C |       |       |      | NoAmplification              |
| msrA-01        | 35C | 29.88 | 76.53 | 2.05 |                              |
| msrC-01        | 35C |       |       |      | NoAmplification              |
| mtrC-01        | 35C | 37.55 | 62.25 | 1.88 | MultipleMeltPeaks            |
| mtrC-02        | 35C | 39.8  | 80.81 | 1.76 |                              |
| mtrD-02        | 35C | 28.64 | 81.69 | 1.99 | MultipleMeltPeaks            |
| mtrD-03        | 35C | 28.23 | 80.26 | 1.8  | MultipleMeltPeaks            |
| NDM1           | 35C |       |       |      | NoAmplification              |
| nimE           | 35C |       |       |      | LowEfficiency, CtIsSmall, S: |
| nisB           | 35C | 38.01 | 86.81 | 1.77 |                              |
| oleC           | 35C | 31.99 | 89.33 | 1.93 |                              |
| oprD           | 35C | 28.07 | 86.96 | 1.95 |                              |
| oprJ           | 35C | 29.72 | 91.09 | 1.89 |                              |
| pbp            | 35C | 36.76 | 87.16 | 1.86 |                              |
| pbp2x          | 35C |       |       |      | NoAmplification              |
| Pbp5           | 35C |       |       |      | CurveFitFailed               |
| penA           | 35C | 35.32 | 85.81 | 1.71 |                              |
| pikR1          | 35C | 30.43 | 89.27 | 1.92 |                              |
| pikR2          | 35C | 32.18 | 84.73 | 1.92 | MultipleMeltPeaks            |
| pmrA           | 35C | 23.03 | 79.6  | 2.07 |                              |
| pncA           | 35C | 24.47 | 89.46 | 1.91 |                              |
| putative multi | 35C | 37.7  | 77.27 | 1.99 | MultipleMeltPeaks            |
| qac            | 35C |       |       |      | LowEfficiency, CtIsSmall, S: |
| qacA           | 35C | 29.65 | 80.86 | 2.01 |                              |
| qacA/qacB      | 35C |       |       |      | NoAmplification              |
| qacEdelta1-0   | 35C |       |       |      | NoAmplification              |
| qacEdelta1-0   | 35C | 30.99 | 86.04 | 1.97 |                              |
| qacH-01        | 35C | 35.55 | 82.83 | 1.92 | MultipleMeltPeaks            |
| qacH-02        | 35C | 36.59 | 84    | 1.63 |                              |
| qnrA           | 35C |       |       |      | NoAmplification              |

|              |     |       |       |      |                              |
|--------------|-----|-------|-------|------|------------------------------|
| rarD-02      | 35C | 41.88 | 90.05 | 1.64 | MultipleMeltPeaks            |
| sat4         | 35C | 22.93 | 75.04 | 2    |                              |
| sdeB         | 35C | 35.59 | 79.97 | 1.92 |                              |
| spcN-01      | 35C |       |       |      | NoAmplification              |
| speA         | 35C |       |       |      | NoAmplification              |
| str          | 35C |       |       |      | NoAmplification              |
| strA         | 35C |       |       |      | LowEfficiency, CtIsSmall, Ct |
| strB         | 35C | 28.34 | 83.9  | 1.92 |                              |
| sul1         | 35C |       |       |      | NoAmplification              |
| sul2         | 35C | 27.96 | 85.83 | 2.01 |                              |
| sulA/foIP-01 | 35C | 20.79 | 81.2  | 2.01 |                              |
| sulA/foIP-03 | 35C | 20.09 | 84.38 | 2.01 |                              |
| tet(32)      | 35C | 28.19 | 81.14 | 1.98 |                              |
| tet(34)      | 35C |       |       |      | CurveFitFailed               |
| tet(35)      | 35C |       |       |      | NoAmplification              |
| tet(36)-A    | 35C | 37.73 | 81.93 | 1.82 |                              |
| tet(36)-B    | 35C |       |       |      | NoAmplification              |
| tet(37)      | 35C | 31.58 | 82.03 | 1.91 |                              |
| tetA-01      | 35C | 33.27 | 85.06 | 1.94 |                              |
| tetA-02      | 35C | 34.18 | 76.13 | 1.89 | MultipleMeltPeaks            |
| tetB-01      | 35C | 33.07 | 78.42 | 1.97 | MultipleMeltPeaks            |
| tetB-02      | 35C | 39.31 | 74.45 | 1.79 |                              |
| tetC-01      | 35C |       |       |      | NoAmplification              |
| tetC-02      | 35C | 37.55 | 84.61 | 1.96 | MultipleMeltPeaks            |
| tetD-01      | 35C |       |       |      | LowEfficiency, CtIsSmall, Ct |
| tetD-02      | 35C | 35.98 | 86.93 | 1.84 | MultipleMeltPeaks            |
| tetE         | 35C |       |       |      | NoAmplification              |
| tetG-01      | 35C | 33.75 | 85.86 | 2.01 |                              |
| tetG-02      | 35C | 32.4  | 75.44 | 1.81 | MultipleMeltPeaks            |
| tetH         | 35C |       |       |      | NoAmplification              |
| tetJ         | 35C |       |       |      | LowEfficiency, CtIsSmall, S: |
| tetK         | 35C | 34.34 | 72.27 | 1.96 |                              |
| tetL-01      | 35C |       |       |      | NoAmplification              |
| tetL-02      | 35C | 37.42 | 85.4  | 1.64 |                              |
| tetM-01      | 35C | 17.91 | 75.99 | 2.05 |                              |
| tetM-02      | 35C | 17.76 | 77.5  | 2.08 |                              |
| tetO-01      | 35C |       |       |      | CurveFitFailed               |
| tetPA        | 35C |       |       |      | NoAmplification              |
| tetPB-01     | 35C | 33.83 | 80.35 | 1.96 |                              |
| tetPB-02     | 35C | 29.46 | 84.74 | 2    |                              |
| tetPB-03     | 35C |       |       |      | LowEfficiency, CtIsSmall, S: |
| tetPB-05     | 35C |       |       |      | LowEfficiency, CtIsSmall, S: |
| tetQ         | 35C | 27.75 | 75.93 | 2.03 |                              |
| tetR-02      | 35C | 30.86 | 90.85 | 1.87 | MultipleMeltPeaks            |
| tetR-03      | 35C |       |       |      | LowEfficiency, CtIsSmall, S: |
| tetS         | 35C | 34.1  | 86.71 | 2.2  |                              |

|             |     |       |       |                              |
|-------------|-----|-------|-------|------------------------------|
| tetT        | 35C |       |       | NoAmplification              |
| tetU-01     | 35C |       |       | NoAmplification              |
| tetV        | 35C |       |       | LowEfficiency, CtIsSmall, S: |
| tetW-01     | 35C | 23.4  | 81.96 | 2                            |
| tetX        | 35C |       |       | LowEfficiency, CtIsSmall, C: |
| tnpA-01     | 35C |       |       | LowEfficiency, CtIsSmall, S: |
| tnpA-02     | 35C | 36.73 | 89.5  | 1.7                          |
| tnpA-03     | 35C | 38.79 | 85.93 | 1.79 MultipleMeltPeaks       |
| tnpA-04     | 35C |       |       | LowEfficiency, CtIsSmall, C: |
| tnpA-05     | 35C | 26.94 | 80.81 | 1.94                         |
| tnpA-07     | 35C |       |       | NoAmplification              |
| tolC-01     | 35C | 33.02 | 81.37 | 2.05                         |
| tolC-02     | 35C | 30.95 | 87.21 | 1.91                         |
| tolC-03     | 35C | 33.52 | 85.2  | 1.95 MultipleMeltPeaks       |
| Tp614       | 35C |       |       | CurveFitFailed               |
| ttgA        | 35C | 36.99 | 88.72 | 1.73 MultipleMeltPeaks       |
| ttgB        | 35C | 35.2  | 78.56 | 1.95                         |
| vanA        | 35C |       |       | NoAmplification              |
| vanB-01     | 35C | 31.52 | 78.26 | 1.62 MultipleMeltPeaks       |
| vanC-01     | 35C |       |       | CurveFitFailed               |
| vanC-02     | 35C |       |       | NoAmplification              |
| vanC-03     | 35C | 26.36 | 88.6  | 1.98 MultipleMeltPeaks       |
| vanC1       | 35C |       |       | NoAmplification              |
| vanC2/vanC3 | 35C | 33.28 | 86.89 | 2.03                         |
| vanG        | 35C |       |       | NoAmplification              |
| vanHB       | 35C | 38.06 | 87.8  | 1.76 MultipleMeltPeaks       |
| vanHD       | 35C |       |       | LowEfficiency, CtIsSmall, C: |
| vanRA-01    | 35C |       |       | NoAmplification              |
| vanRA-02    | 35C |       |       | NoAmplification              |
| vanRB       | 35C | 31.53 | 75.34 | 2.18 MultipleMeltPeaks       |
| vanRC       | 35C |       |       | LowEfficiency, CtIsSmall, C: |
| vanRC4      | 35C |       |       | LowEfficiency, CtIsSmall, C: |
| vanRD       | 35C |       |       | NoAmplification              |
| vanSA       | 35C |       |       | LowEfficiency, CtIsSmall, S: |
| vanSB       | 35C | 30.79 | 74.32 | 2                            |
| vanSC-01    | 35C |       |       | CurveFitFailed               |
| vanSC-02    | 35C |       |       | NoAmplification              |
| vanTC-01    | 35C |       |       | LowEfficiency, CtIsSmall, S: |
| vanTC-02    | 35C | 33.92 | 88.38 | 1.86                         |
| vanTE       | 35C |       |       | NoAmplification              |
| vanTG       | 35C |       |       | NoAmplification              |
| vanWB       | 35C |       |       | LowEfficiency, CtIsSmall, S: |
| vanWG       | 35C |       |       | LowEfficiency, CtIsSmall, S: |
| vanXA       | 35C |       |       | CurveFitFailed               |
| vanXB       | 35C |       |       | NoAmplification              |
| vanXD       | 35C | 31.65 | 75.09 | 2.02                         |

|              |     |       |       |      |                              |
|--------------|-----|-------|-------|------|------------------------------|
| vanYB        | 35C |       |       |      | CurveFitFailed               |
| vanYD-01     | 35C | 32.98 | 85.43 | 1.88 | MultipleMeltPeaks            |
| vanYD-02     | 35C |       |       |      | NoAmplification              |
| vatB-01      | 35C |       |       |      | NoAmplification              |
| vatB-02      | 35C |       |       |      | LowEfficiency, CtIsSmall, S: |
| vatC-01      | 35C | 34.31 | 81.3  | 1.9  |                              |
| vatC-02      | 35C | 38.34 | 83.18 | 1.84 | MultipleMeltPeaks            |
| vatE-01      | 35C | 29.9  | 75.58 | 2.1  |                              |
| vatE-02      | 35C | 38.31 | 74.88 | 1.93 |                              |
| vgaA-01      | 35C | 33.12 | 83.24 | 1.93 |                              |
| vgaA-02      | 35C |       |       |      | LowEfficiency, CtIsSmall, S: |
| vgb-01       | 35C | 37.01 | 87.15 | 1.92 |                              |
| vgbB-01      | 35C |       |       |      | NoAmplification              |
| vgbB-02      | 35C |       |       |      | NoAmplification              |
| yceE/mdtG-0  | 35C |       |       |      | LowEfficiency, CtIsSmall, S: |
| yceE/mdtG-0  | 35C | 39.16 | 81.17 | 1.73 |                              |
| yceL/mdtH-0  | 35C | 30.71 | 90.73 | 1.99 |                              |
| yceL/mdtH-0  | 35C |       |       |      | NoAmplification              |
| yceL/mdtH-0  | 35C | 37.81 | 89.01 | 1.79 | MultipleMeltPeaks            |
| yidY/mdtL-01 | 35C | 34.94 | 79.23 | 1.91 | MultipleMeltPeaks            |
| yidY/mdtL-02 | 35C |       |       |      | NoAmplification              |































| Assay          | Sample | Ct | Tm    | Efficiency | flag                         |
|----------------|--------|----|-------|------------|------------------------------|
| 16S rRNA       | 36A    |    | 12.3  | 82.11      | 2.06                         |
| aac            | 36A    |    | 34.09 | 81.92      | 1.77 MultipleMeltPeaks       |
| aac(6')-Ib(akz | 36A    |    | 34.77 | 83.18      | 1.83 MultipleMeltPeaks       |
| aac(6')-Ib(akz | 36A    |    | 30.1  | 86.14      | 1.93                         |
| aac(6')-Ib(akz | 36A    |    | 32.85 | 83.62      | 1.93 MultipleMeltPeaks       |
| aac(6')-II     | 36A    |    | 32.9  | 87.84      | 1.81                         |
| aac(6')I1      | 36A    |    | 32.76 | 89.13      | 1.88                         |
| aacA/aphD      | 36A    |    |       |            | LowEfficiency, CtIsSmall, S: |
| aacC           | 36A    |    | 22.9  | 88.74      | 1.92                         |
| aacC1          | 36A    |    | 34.19 | 78.9       | 1.97                         |
| aacC2          | 36A    |    | 36.4  | 78.3       | 1.88                         |
| aacC4          | 36A    |    | 29.32 | 90.06      | 1.97                         |
| aadA-01        | 36A    |    |       |            | LowEfficiency, CtIsSmall, C: |
| aadA-02        | 36A    |    | 35.51 | 86.86      | 1.84                         |
| aadA-1-01      | 36A    |    | 23.08 | 80.1       | 1.98                         |
| aadA-1-02      | 36A    |    | 21.4  | 76.66      | 2.04                         |
| aadA1          | 36A    |    | 33.38 | 84.97      | 1.89                         |
| aadA2-01       | 36A    |    | 34.85 | 90.49      | 1.81                         |
| aadA2-02       | 36A    |    | 32.58 | 75.42      | 2.01                         |
| aadA2-03       | 36A    |    | 34.34 | 90.53      | 1.77                         |
| aadA5-01       | 36A    |    | 36.41 | 82.82      | 1.82                         |
| aadA5-02       | 36A    |    | 26.49 | 86.03      | 1.66                         |
| aadA9-01       | 36A    |    |       |            | CurveFitFailed               |
| aadA9-02       | 36A    |    |       |            | LowEfficiency, CtIsSmall, S: |
| aadD           | 36A    |    |       |            | LowEfficiency, CtIsSmall, C: |
| aadE           | 36A    |    | 21.95 | 72.27      | 2.09                         |
| acrA-01        | 36A    |    | 26.67 | 82.71      | 1.95 MultipleMeltPeaks       |
| acrA-02        | 36A    |    | 28.51 | 88.39      | 1.83                         |
| acrA-03        | 36A    |    | 36.17 | 82.35      | 1.7 MultipleMeltPeaks        |
| acrA-04        | 36A    |    | 29.6  | 80.31      | 1.99 MultipleMeltPeaks       |
| acrA-05        | 36A    |    | 24.28 | 88.78      | 1.87                         |
| acrB-01        | 36A    |    |       |            | NoAmplification              |
| acrF           | 36A    |    | 26.8  | 83.17      | 1.81                         |
| acrR-01        | 36A    |    | 36.05 | 87.09      | 1.77 MultipleMeltPeaks       |
| acrR-02        | 36A    |    | 38.6  | 75.82      | 1.79 MultipleMeltPeaks       |
| Actin          | 36A    |    | 21.68 | 87.06      | 1.94                         |
| adeA           | 36A    |    | 37.29 | 86.64      | 1.78                         |
| ampC-01        | 36A    |    | 28.09 | 87.6       | 1.97                         |
| ampC-02        | 36A    |    | 34.39 | 81.92      | 1.9 MultipleMeltPeaks        |
| ampC-04        | 36A    |    | 25.44 | 86.22      | 2.07                         |
| ampC-05        | 36A    |    |       |            | CurveFitFailed               |
| ampC-06        | 36A    |    | 33.12 | 87.42      | 1.88                         |
| ampC-07        | 36A    |    | 32.53 | 83.65      | 1.91                         |
| ampC-09        | 36A    |    | 35.02 | 91.84      | 1.71                         |
| ampC/blaDH     | 36A    |    | 30.05 | 84.04      | 1.95 MultipleMeltPeaks       |

|               |     |       |       |      |                             |
|---------------|-----|-------|-------|------|-----------------------------|
| aph           | 36A |       |       |      | CurveFitFailed              |
| aph(2')-Id-01 | 36A |       |       |      | LowEfficiency, CtIsSmall, S |
| aph(2')-Id-02 | 36A |       |       |      | CurveFitFailed              |
| aph6ia        | 36A | 30.09 | 78.37 | 2.1  |                             |
| aphA1(aka k   | 36A |       |       |      | LowEfficiency, CtIsSmall, S |
| bacA-01       | 36A | 35.94 | 81.58 | 1.84 |                             |
| bacA-02       | 36A | 22.16 | 83.58 | 1.87 |                             |
| BETA-globin   | 36A | 23.07 | 84.04 | 1.99 | MultipleMeltPeaks           |
| bla-ACC-1     | 36A | 32.35 | 86.6  | 1.92 |                             |
| bla-L1        | 36A | 30.21 | 86.28 | 1.97 |                             |
| bla1          | 36A |       |       |      | LowEfficiency, CtIsSmall, C |
| blaCMY        | 36A | 31.14 | 80.43 | 1.98 |                             |
| blaCMY2-01    | 36A | 31.85 | 75.18 | 2.08 |                             |
| blaCMY2-02    | 36A | 28.53 | 86.07 | 2.01 |                             |
| blaCTX-M-01   | 36A | 34.17 | 83.07 | 1.83 |                             |
| blaCTX-M-02   | 36A | 28.75 | 89.43 | 1.88 |                             |
| blaCTX-M-03   | 36A |       |       |      | CurveFitFailed              |
| blaCTX-M-04   | 36A | 20.78 | 84.83 | 1.86 | MultipleMeltPeaks           |
| blaCTX-M-05   | 36A | 33.25 | 76.2  | 1.75 |                             |
| blaCTX-M-06   | 36A |       |       |      | LowEfficiency, CtIsSmall, C |
| blaGES        | 36A |       |       |      | LowEfficiency, CtIsSmall, C |
| blaIMP-01     | 36A |       |       |      | CurveFitFailed              |
| blaIMP-02     | 36A |       |       |      | LowEfficiency, CtIsSmall, C |
| blaMOX/blaC   | 36A | 35.15 | 86.81 | 1.75 |                             |
| blaOCH        | 36A | 29.62 | 83.92 | 2.17 |                             |
| blaOKP        | 36A |       |       |      | BadR2, CtIsSmall, Saturatio |
| blaOXA1/blaC  | 36A |       |       |      | LowEfficiency, CtIsSmall, S |
| blaOXA10-01   | 36A |       |       |      | LowEfficiency, CtIsSmall, C |
| blaOXA10-02   | 36A | 32.86 | 78.36 | 2.01 |                             |
| blaOXY        | 36A | 25.67 | 88.96 | 1.83 |                             |
| blaPAO        | 36A |       |       |      | NoAmplification             |
| blaPER        | 36A |       |       |      | CurveFitFailed              |
| blaPSE        | 36A | 38.8  | 78.37 | 1.57 |                             |
| blaROB        | 36A | 35.23 | 82.24 | 1.84 |                             |
| blaSFO        | 36A | 27    | 86.91 | 1.91 |                             |
| blaSHV-01     | 36A | 20.87 | 88.9  | 1.94 |                             |
| blaSHV-02     | 36A | 37.47 | 78.02 | 1.86 | MultipleMeltPeaks           |
| blaTEM        | 36A | 29.8  | 79.63 | 2.04 |                             |
| blaTLA        | 36A |       |       |      | CurveFitFailed              |
| blaVEB        | 36A |       |       |      | CurveFitFailed              |
| blaVIM        | 36A |       |       |      | NoAmplification             |
| blaZ          | 36A | 29.24 | 75.23 | 2.03 |                             |
| carB          | 36A | 31.63 | 88.48 | 1.97 |                             |
| catA1         | 36A |       |       |      | NoAmplification             |
| catB3         | 36A |       |       |      | BadR2, LowEfficiency, CtIsS |
| catB8         | 36A | 30.55 | 81.67 | 1.97 |                             |

|            |     |       |       |      |                              |
|------------|-----|-------|-------|------|------------------------------|
| ceoA       | 36A | 29.7  | 92.53 | 2    | MultipleMeltPeaks            |
| cepA       | 36A |       |       |      | CurveFitFailed               |
| cfiA       | 36A | 32.75 | 87.06 | 1.93 |                              |
| cfr        | 36A |       |       |      | CurveFitFailed               |
| cfxA       | 36A | 18.79 | 77.81 | 2.12 |                              |
| cmeA       | 36A |       |       |      | BadR2, HighEfficiency, Satu  |
| cmlA1-01   | 36A | 35.1  | 85.61 | 1.71 |                              |
| cmlA1-02   | 36A | 35.02 | 85.63 | 1.71 |                              |
| cmr        | 36A |       |       |      | LowEfficiency, CtIsSmall, S: |
| cmx(A)     | 36A | 28.48 | 87.56 | 2.06 |                              |
| cphA-01    | 36A | 27.89 | 86.84 | 1.95 |                              |
| cphA-02    | 36A | 29.11 | 81.56 | 1.93 |                              |
| dfrA1      | 36A |       |       |      | NoAmplification              |
| dfrA12     | 36A | 35.44 | 85.13 | 1.68 |                              |
| emrD       | 36A | 25.45 | 90.46 | 1.89 |                              |
| ereA       | 36A |       |       |      | BadR2, LowEfficiency, CtIsS  |
| ereB       | 36A | 34.14 | 82.1  | 1.84 | MultipleMeltPeaks            |
| erm(34)    | 36A | 31.73 | 88.01 | 1.91 |                              |
| erm(35)    | 36A |       |       |      | CurveFitFailed               |
| erm(36)    | 36A | 27.79 | 84.95 | 2.16 |                              |
| ermA       | 36A |       |       |      | CurveFitFailed               |
| ermA/ermTR | 36A |       |       |      | NoAmplification              |
| ermB       | 36A | 20.27 | 75.16 | 2.13 |                              |
| ermC       | 36A | 28.75 | 75.96 | 2.14 |                              |
| ermF       | 36A |       |       |      | LowEfficiency, CtIsSmall, S: |
| ermJ/ermD  | 36A | 40.21 | 84.34 | 1.56 | MultipleMeltPeaks            |
| ermK-01    | 36A | 30.16 | 78.65 | 2.08 |                              |
| ermK-02    | 36A | 32.16 | 88.7  | 1.9  | MultipleMeltPeaks            |
| ermT-01    | 36A |       |       |      | LowEfficiency, CtIsSmall, Ci |
| ermT-02    | 36A |       |       |      | CurveFitFailed               |
| ermX       | 36A | 28.55 | 83.18 | 1.88 |                              |
| ermY       | 36A | 39.35 | 75.67 | 1.83 |                              |
| fabK       | 36A | 21.67 | 79.62 | 2.18 |                              |
| floR       | 36A | 33.81 | 89.9  | 1.87 |                              |
| folA       | 36A | 37.68 | 85.1  | 1.63 | MultipleMeltPeaks            |
| fosB       | 36A |       |       |      | LowEfficiency, CtIsSmall, S: |
| fosX       | 36A |       |       |      | CurveFitFailed               |
| fox5       | 36A | 26.07 | 86.68 | 1.96 |                              |
| imiR       | 36A |       |       |      | CurveFitFailed               |
| ImrA-01    | 36A |       |       |      | NoAmplification              |
| intl       | 36A | 30.25 | 85.16 | 1.98 | MultipleMeltPeaks            |
| intl1      | 36A | 20.08 | 87.81 | 2    |                              |
| IS613      | 36A | 22.87 | 79.86 | 2.08 |                              |
| lnuA-01    | 36A |       |       |      | LowEfficiency, CtIsSmall, S: |
| lnuB-01    | 36A |       |       |      | LowEfficiency, CtIsSmall, Ci |
| lnuB-02    | 36A |       |       |      | LowEfficiency, CtIsSmall, Ci |

|               |     |       |       |      |                              |
|---------------|-----|-------|-------|------|------------------------------|
| lnuC          | 36A |       |       |      | CurveFitFailed               |
| marR-01       | 36A | 33.47 | 87.2  | 1.92 |                              |
| matA/mel      | 36A | 16.32 | 77.86 | 2.18 |                              |
| mdet1         | 36A |       |       |      | LowEfficiency, CtIsSmall, Ci |
| mdtA          | 36A |       |       |      | CtIsSmall, SaturationBaseli  |
| mdtE/yhiU     | 36A | 32.35 | 85.46 | 1.87 | MultipleMeltPeaks            |
| mecA          | 36A |       |       |      | LowEfficiency, CtIsSmall, Ci |
| mefA          | 36A | 15.54 | 80.75 | 2.13 |                              |
| mepA          | 36A | 22.38 | 87.94 | 1.99 |                              |
| mexA          | 36A | 35.99 | 79.39 | 1.87 | MultipleMeltPeaks            |
| mexD          | 36A | 31.7  | 80.43 | 2.04 |                              |
| mexE          | 36A | 31.92 | 90.21 | 1.89 |                              |
| mexF          | 36A | 24.29 | 89.51 | 2.09 | MultipleMeltPeaks            |
| mphA-01       | 36A | 29.68 | 87.03 | 1.89 |                              |
| mphA-02       | 36A | 26.9  | 88.07 | 2.04 |                              |
| mphB          | 36A | 35.89 | 88.54 | 1.86 |                              |
| mphC          | 36A | 38.22 | 74.74 | 1.81 |                              |
| msrA-01       | 36A |       |       |      | LowEfficiency, CtIsSmall, S: |
| msrC-01       | 36A |       |       |      | NoAmplification              |
| mtrC-01       | 36A | 28.64 | 86.77 | 1.94 |                              |
| mtrC-02       | 36A | 31.94 | 83.96 | 1.96 |                              |
| mtrD-02       | 36A | 27.05 | 87.21 | 2    | MultipleMeltPeaks            |
| mtrD-03       | 36A | 21.52 | 85.55 | 1.84 | MultipleMeltPeaks            |
| NDM1          | 36A | 39.1  | 84.45 | 1.76 | MultipleMeltPeaks            |
| nimE          | 36A | 36.6  | 83.16 | 1.77 |                              |
| nisB          | 36A |       |       |      | CurveFitFailed               |
| oleC          | 36A | 33.19 | 91.9  | 1.9  |                              |
| oprD          | 36A | 28.24 | 87.06 | 1.99 | MultipleMeltPeaks            |
| oprJ          | 36A | 26.83 | 91.99 | 2    |                              |
| pbp           | 36A |       |       |      | LowEfficiency, CtIsSmall, S: |
| pbp2x         | 36A |       |       |      | NoAmplification              |
| Pbp5          | 36A |       |       |      | CurveFitFailed               |
| penA          | 36A | 30.92 | 90.04 | 1.85 | MultipleMeltPeaks            |
| pikR1         | 36A | 30.05 | 89.62 | 1.92 |                              |
| pikR2         | 36A | 29.23 | 91.1  | 2.01 |                              |
| pmrA          | 36A | 20.67 | 78.96 | 2.13 |                              |
| pncA          | 36A | 21.56 | 89.52 | 1.89 |                              |
| putative mul1 | 36A | 32.15 | 84.18 | 1.94 |                              |
| qac           | 36A |       |       |      | LowEfficiency, CtIsSmall, S: |
| qacA          | 36A |       |       |      | LowEfficiency, CtIsSmall, Ci |
| qacA/qacB     | 36A |       |       |      | CurveFitFailed               |
| qacEdelta1-0  | 36A |       |       |      | CurveFitFailed               |
| qacEdelta1-0  | 36A | 28.63 | 79.68 | 1.97 | MultipleMeltPeaks            |
| qacH-01       | 36A | 28.7  | 88    | 1.94 |                              |
| qacH-02       | 36A | 36.99 | 83.99 | 1.73 |                              |
| qnrA          | 36A | 30.4  | 80.92 | 1.98 |                              |



|              |     |       |       |      |                              |
|--------------|-----|-------|-------|------|------------------------------|
| rarD-02      | 36A |       |       |      | NoAmplification              |
| sat4         | 36A | 21.75 | 75.21 | 2.02 |                              |
| sdeB         | 36A |       |       |      | LowEfficiency, CtIsSmall, Ci |
| spcN-01      | 36A |       |       |      | CurveFitFailed               |
| speA         | 36A |       |       |      | NoAmplification              |
| str          | 36A |       |       |      | CurveFitFailed               |
| strA         | 36A |       |       |      | CurveFitFailed               |
| strB         | 36A | 27.97 | 84.06 | 1.94 |                              |
| sul1         | 36A | 30.62 | 89.55 | 1.84 |                              |
| sul2         | 36A | 32.32 | 81.26 | 1.81 | MultipleMeltPeaks            |
| sulA/foIP-01 | 36A | 18.24 | 81.11 | 2.02 |                              |
| sulA/foIP-03 | 36A | 17.66 | 83.13 | 2.01 |                              |
| tet(32)      | 36A | 25.76 | 80.85 | 1.97 |                              |
| tet(34)      | 36A | 29.44 | 76.09 | 2    |                              |
| tet(35)      | 36A |       |       |      | NoAmplification              |
| tet(36)-A    | 36A |       |       |      | CurveFitFailed               |
| tet(36)-B    | 36A |       |       |      | LowEfficiency, CtIsSmall, Ci |
| tet(37)      | 36A | 25.21 | 85.92 | 1.96 |                              |
| tetA-01      | 36A | 30.52 | 85.22 | 2.03 |                              |
| tetA-02      | 36A | 32.98 | 90.05 | 1.9  |                              |
| tetB-01      | 36A | 31.21 | 81.81 | 1.97 | MultipleMeltPeaks            |
| tetB-02      | 36A | 38.53 | 75.07 | 1.91 |                              |
| tetC-01      | 36A |       |       |      | NoAmplification              |
| tetC-02      | 36A | 27.77 | 76.13 | 2.04 |                              |
| tetD-01      | 36A |       |       |      | LowEfficiency, CtIsSmall, S: |
| tetD-02      | 36A | 31.8  | 81.5  | 1.97 |                              |
| tetE         | 36A |       |       |      | LowEfficiency, CtIsSmall, S: |
| tetG-01      | 36A | 30.06 | 90.28 | 1.89 |                              |
| tetG-02      | 36A | 27.97 | 87.34 | 2    |                              |
| tetH         | 36A |       |       |      | LowEfficiency, CtIsSmall, Ci |
| tetJ         | 36A |       |       |      | LowEfficiency, CtIsSmall, Ci |
| tetK         | 36A |       |       |      | CurveFitFailed               |
| tetL-01      | 36A | 38.18 | 80.83 | 1.71 | MultipleMeltPeaks            |
| tetL-02      | 36A | 31.27 | 83.38 | 1.97 | MultipleMeltPeaks            |
| tetM-01      | 36A | 17.39 | 76.38 | 2.02 |                              |
| tetM-02      | 36A | 17.52 | 77.58 | 2.07 |                              |
| tetO-01      | 36A | 28.05 | 76.83 | 1.98 |                              |
| tetPA        | 36A |       |       |      | LowEfficiency, CtIsSmall, Ci |
| tetPB-01     | 36A | 35.79 | 85.43 | 1.8  |                              |
| tetPB-02     | 36A | 27.72 | 85.56 | 2.01 |                              |
| tetPB-03     | 36A |       |       |      | CurveFitFailed               |
| tetPB-05     | 36A |       |       |      | CurveFitFailed               |
| tetQ         | 36A | 19.34 | 76.35 | 2.09 |                              |
| tetR-02      | 36A | 30.15 | 89.41 | 1.94 |                              |
| tetR-03      | 36A | 27.39 | 76.25 | 1.97 |                              |
| tetS         | 36A | 32.09 | 88.47 | 2.02 |                              |

|             |     |       |       |      |                              |
|-------------|-----|-------|-------|------|------------------------------|
| tetT        | 36A |       |       |      | NoAmplification              |
| tetU-01     | 36A |       |       |      | BadR2, LowEfficiency, CtIsS  |
| tetV        | 36A | 30.95 | 89.55 | 1.84 |                              |
| tetW-01     | 36A |       |       |      | LowEfficiency, CtIsSmall, S: |
| tetX        | 36A |       |       |      | CurveFitFailed               |
| tnpA-01     | 36A |       |       |      | BadR2, LowEfficiency, CtIsS  |
| tnpA-02     | 36A | 27.73 | 84.24 | 1.84 |                              |
| tnpA-03     | 36A | 25.05 | 78.11 | 2.1  |                              |
| tnpA-04     | 36A |       |       |      | CurveFitFailed               |
| tnpA-05     | 36A | 28.82 | 80.74 | 1.93 |                              |
| tnpA-07     | 36A |       |       |      | LowEfficiency, CtIsSmall, Ci |
| tolC-01     | 36A | 36.73 | 79.87 | 1.84 | MultipleMeltPeaks            |
| tolC-02     | 36A | 30.97 | 84.6  | 1.93 | MultipleMeltPeaks            |
| tolC-03     | 36A | 29.99 | 88.02 | 1.98 |                              |
| Tp614       | 36A | 32.69 | 83.36 | 1.91 |                              |
| ttgA        | 36A | 36.83 | 84.05 | 1.76 |                              |
| ttgB        | 36A |       |       |      | CurveFitFailed               |
| vanA        | 36A |       |       |      | NoAmplification              |
| vanB-01     | 36A | 28.95 | 83.92 | 1.98 |                              |
| vanC-01     | 36A |       |       |      | CurveFitFailed               |
| vanC-02     | 36A |       |       |      | CurveFitFailed               |
| vanC-03     | 36A | 25.88 | 86.92 | 1.94 |                              |
| vanC1       | 36A |       |       |      | CurveFitFailed               |
| vanC2/vanC3 | 36A | 32.72 | 84.88 | 2.05 |                              |
| vanG        | 36A |       |       |      | LowEfficiency, CtIsSmall, Ci |
| vanHB       | 36A | 31.73 | 87.45 | 1.96 | MultipleMeltPeaks            |
| vanHD       | 36A | 33.83 | 84.66 | 1.89 |                              |
| vanRA-01    | 36A |       |       |      | LowEfficiency, CtIsSmall, Ci |
| vanRA-02    | 36A |       |       |      | LowEfficiency, CtIsSmall, Ci |
| vanRB       | 36A | 32.24 | 87.57 | 2.09 |                              |
| vanRC       | 36A |       |       |      | LowEfficiency, CtIsSmall, S: |
| vanRC4      | 36A |       |       |      | CurveFitFailed               |
| vanRD       | 36A |       |       |      | LowEfficiency, CtIsSmall, S: |
| vanSA       | 36A |       |       |      | LowEfficiency, CtIsSmall, S: |
| vanSB       | 36A | 28.23 | 74.94 | 2.03 |                              |
| vanSC-01    | 36A | 29.82 | 83.99 | 2.15 | MultipleMeltPeaks            |
| vanSC-02    | 36A |       |       |      | NoAmplification              |
| vanTC-01    | 36A |       |       |      | CurveFitFailed               |
| vanTC-02    | 36A | 25.66 | 86.44 | 1.88 |                              |
| vanTE       | 36A | 30.57 | 88.71 | 1.89 |                              |
| vanTG       | 36A |       |       |      | BadR2, CtIsSmall, Saturatio  |
| vanWB       | 36A |       |       |      | NoAmplification              |
| vanWG       | 36A | 34.9  | 74.52 | 1.97 |                              |
| vanXA       | 36A |       |       |      | CurveFitFailed               |
| vanXB       | 36A |       |       |      | LowEfficiency, CtIsSmall, Ci |
| vanXD       | 36A | 31.46 | 75.3  | 2.03 |                              |

|              |     |       |       |      |                              |
|--------------|-----|-------|-------|------|------------------------------|
| vanYB        | 36A |       |       |      | LowEfficiency, CtIsSmall, S: |
| vanYD-01     | 36A | 29    | 89.07 | 1.77 |                              |
| vanYD-02     | 36A |       |       |      | LowEfficiency, CtIsSmall, C: |
| vatB-01      | 36A |       |       |      | CurveFitFailed               |
| vatB-02      | 36A |       |       |      | CurveFitFailed               |
| vatC-01      | 36A | 32.61 | 83.08 | 1.98 | MultipleMeltPeaks            |
| vatC-02      | 36A | 36.27 | 88.17 | 1.81 |                              |
| vatE-01      | 36A | 30.68 | 77.29 | 2.12 |                              |
| vatE-02      | 36A |       |       |      | NoAmplification              |
| vgaA-01      | 36A | 36.07 | 85.91 | 1.79 |                              |
| vgaA-02      | 36A |       |       |      | LowEfficiency, CtIsSmall, S: |
| vgb-01       | 36A | 33.13 | 88.95 | 1.93 |                              |
| vgbB-01      | 36A |       |       |      | LowEfficiency, CtIsSmall, S: |
| vgbB-02      | 36A |       |       |      | CurveFitFailed               |
| yceE/mdtG-0  | 36A |       |       |      | LowEfficiency, CtIsSmall, S: |
| yceE/mdtG-0  | 36A | 36.09 | 80.88 | 1.83 |                              |
| yceL/mdtH-0  | 36A | 24.74 | 84.73 | 1.93 |                              |
| yceL/mdtH-0  | 36A |       |       |      | LowEfficiency, CtIsSmall, C: |
| yceL/mdtH-0  | 36A | 29.53 | 79.68 | 1.96 |                              |
| yidY/mdtL-01 | 36A | 31.76 | 88.78 | 1.92 |                              |
| yidY/mdtL-02 | 36A |       |       |      | LowEfficiency, CtIsSmall, C: |































| Assay          | Sample | Ct | Tm    | Efficiency | flag                         |
|----------------|--------|----|-------|------------|------------------------------|
| 16S rRNA       | 36B    |    | 13.74 | 82.27      | 2                            |
| aac            | 36B    |    | 29.82 | 81.43      | 1.91 MultipleMeltPeaks       |
| aac(6')-Ib(akz | 36B    |    | 30.34 | 83.04      | 1.92                         |
| aac(6')-Ib(akz | 36B    |    | 30.48 | 82.49      | 1.98 MultipleMeltPeaks       |
| aac(6')-Ib(akz | 36B    |    | 30.71 | 87.98      | 2 MultipleMeltPeaks          |
| aac(6')-II     | 36B    |    | 34.58 | 81.08      | 1.57 MultipleMeltPeaks       |
| aac(6')I1      | 36B    |    | 30.54 | 89.55      | 2                            |
| aacA/aphD      | 36B    |    |       |            | LowEfficiency, CtIsSmall, S: |
| aacC           | 36B    |    | 25.05 | 88.69      | 1.96                         |
| aacC1          | 36B    |    |       |            | BadR2, LowEfficiency, CtIsS  |
| aacC2          | 36B    |    |       |            | NoAmplification              |
| aacC4          | 36B    |    | 31    | 89.98      | 1.98                         |
| aadA-01        | 36B    |    |       |            | CurveFitFailed               |
| aadA-02        | 36B    |    | 36.94 | 80.36      | 1.78 MultipleMeltPeaks       |
| aadA-1-01      | 36B    |    | 27.51 | 81.12      | 1.91                         |
| aadA-1-02      | 36B    |    | 25.55 | 76.49      | 2                            |
| aadA1          | 36B    |    | 30.27 | 84.25      | 2.04                         |
| aadA2-01       | 36B    |    | 29.87 | 88.31      | 1.94 MultipleMeltPeaks       |
| aadA2-02       | 36B    |    | 30.21 | 75.64      | 2.04                         |
| aadA2-03       | 36B    |    | 33.69 | 90.19      | 1.83                         |
| aadA5-01       | 36B    |    | 32.18 | 84.89      | 1.95                         |
| aadA5-02       | 36B    |    | 29.77 | 86.31      | 1.89 MultipleMeltPeaks       |
| aadA9-01       | 36B    |    | 33.15 | 90.64      | 1.8 MultipleMeltPeaks        |
| aadA9-02       | 36B    |    |       |            | LowEfficiency, CtIsSmall, S: |
| aadD           | 36B    |    |       |            | CurveFitFailed               |
| aadE           | 36B    |    | 27.13 | 72.24      | 2.05                         |
| acrA-01        | 36B    |    | 28.63 | 88.68      | 1.97                         |
| acrA-02        | 36B    |    | 29.08 | 88.39      | 1.86                         |
| acrA-03        | 36B    |    | 34.08 | 90.49      | 1.92                         |
| acrA-04        | 36B    |    | 28.51 | 88.87      | 1.96 MultipleMeltPeaks       |
| acrA-05        | 36B    |    | 25.15 | 88.81      | 1.89                         |
| acrB-01        | 36B    |    |       |            | LowEfficiency, CtIsSmall, S: |
| acrF           | 36B    |    | 26.82 | 83.11      | 1.82                         |
| acrR-01        | 36B    |    | 33.64 | 81.09      | 1.91 MultipleMeltPeaks       |
| acrR-02        | 36B    |    | 37.27 | 83.26      | 1.87                         |
| Actin          | 36B    |    | 21.01 | 87.06      | 1.97                         |
| adeA           | 36B    |    | 36.49 | 87.92      | 1.88                         |
| ampC-01        | 36B    |    | 27.58 | 81.05      | 1.99 MultipleMeltPeaks       |
| ampC-02        | 36B    |    |       |            | LowEfficiency, CtIsSmall, S: |
| ampC-04        | 36B    |    | 27.04 | 86.06      | 2.07                         |
| ampC-05        | 36B    |    | 36.87 | 91.44      | 1.74                         |
| ampC-06        | 36B    |    | 35.91 | 90.35      | 1.79                         |
| ampC-07        | 36B    |    | 34.62 | 88.29      | 1.87 MultipleMeltPeaks       |
| ampC-09        | 36B    |    | 35.61 | 87.62      | 1.75                         |
| ampC/blaDH     | 36B    |    | 28.28 | 83.78      | 2 MultipleMeltPeaks          |

|                            |     |       |       |      |                                          |
|----------------------------|-----|-------|-------|------|------------------------------------------|
| aph                        | 36B |       |       |      | LowEfficiency, CtIsSmall, Ci             |
| aph(2')-Id-01              | 36B |       |       |      | LowEfficiency, CtIsSmall, Ci             |
| aph(2')-Id-02              | 36B |       |       |      | CurveFitFailed                           |
| aph6ia                     | 36B | 36.14 | 79.12 | 1.85 |                                          |
| aphA1(aka k <sub>z</sub> ) | 36B | 33.96 | 83.16 | 1.93 | MultipleMeltPeaks                        |
| bacA-01                    | 36B |       |       |      | CurveFitFailed                           |
| bacA-02                    | 36B | 23.74 | 83.56 | 1.86 |                                          |
| BETA-globin                | 36B | 22.54 | 84.04 | 2.02 |                                          |
| bla-ACC-1                  | 36B | 33.4  | 86.05 | 1.87 |                                          |
| bla-L1                     | 36B | 27.93 | 85.42 | 2.01 |                                          |
| bla1                       | 36B |       |       |      | LowEfficiency, CtIsSmall, Ci             |
| blaCMY                     | 36B | 30.09 | 80.75 | 1.99 |                                          |
| blaCMY2-01                 | 36B | 30.63 | 78.12 | 2.07 |                                          |
| blaCMY2-02                 | 36B | 27.22 | 84.9  | 2    |                                          |
| blaCTX-M-01                | 36B | 34.21 | 85.4  | 1.9  |                                          |
| blaCTX-M-02                | 36B | 29.72 | 89.16 | 1.9  |                                          |
| blaCTX-M-03                | 36B |       |       |      | CurveFitFailed                           |
| blaCTX-M-04                | 36B | 22.99 | 88.19 | 1.88 | MultipleMeltPeaks                        |
| blaCTX-M-05                | 36B | 34.74 | 75.53 | 1.65 | MultipleMeltPeaks                        |
| blaCTX-M-06                | 36B |       |       |      | CurveFitFailed                           |
| blaGES                     | 36B |       |       |      | LowEfficiency, CtIsSmall, S <sub>c</sub> |
| blaIMP-01                  | 36B |       |       |      | CurveFitFailed                           |
| blaIMP-02                  | 36B |       |       |      | LowEfficiency, CtIsSmall, Ci             |
| blaMOX/blaC                | 36B | 33.73 | 79.71 | 1.95 | MultipleMeltPeaks                        |
| blaOCH                     | 36B |       |       |      | NoAmplification                          |
| blaOKP                     | 36B |       |       |      | NoAmplification                          |
| blaOXA1/blaC               | 36B |       |       |      | CurveFitFailed                           |
| blaOXA10-01                | 36B |       |       |      | CurveFitFailed                           |
| blaOXA10-02                | 36B |       |       |      | LowEfficiency, CtIsSmall, S <sub>c</sub> |
| blaOXY                     | 36B | 28.13 | 88.94 | 1.88 | MultipleMeltPeaks                        |
| blaPAO                     | 36B |       |       |      | LowEfficiency, CtIsSmall, Ci             |
| blaPER                     | 36B |       |       |      | LowEfficiency, CtIsSmall, S <sub>c</sub> |
| blaPSE                     | 36B | 37.09 | 85.55 | 1.64 |                                          |
| blaROB                     | 36B | 35.62 | 81.85 | 1.87 |                                          |
| blaSFO                     | 36B | 27.61 | 86.87 | 1.96 |                                          |
| blaSHV-01                  | 36B | 23.79 | 88.86 | 1.93 |                                          |
| blaSHV-02                  | 36B |       |       |      | CurveFitFailed                           |
| blaTEM                     | 36B | 31.65 | 86.82 | 2.02 |                                          |
| blaTLA                     | 36B |       |       |      | LowEfficiency, CtIsSmall, Ci             |
| blaVEB                     | 36B |       |       |      | CurveFitFailed                           |
| blaVIM                     | 36B |       |       |      | CurveFitFailed                           |
| blaZ                       | 36B | 27.63 | 74.85 | 2.07 |                                          |
| carB                       | 36B | 33.75 | 88.68 | 1.88 |                                          |
| catA1                      | 36B |       |       |      | NoAmplification                          |
| catB3                      | 36B | 36.72 | 85.54 | 1.78 |                                          |
| catB8                      | 36B | 26.56 | 82.45 | 1.93 |                                          |

|            |     |       |       |                              |
|------------|-----|-------|-------|------------------------------|
| ceoA       | 36B | 28.21 | 82.15 | 1.96 MultipleMeltPeaks       |
| cepA       | 36B |       |       | LowEfficiency, CtIsSmall, S: |
| cfiA       | 36B | 30.71 | 86.43 | 1.98 MultipleMeltPeaks       |
| cfr        | 36B |       |       | LowEfficiency, CtIsSmall, S: |
| cfxA       | 36B | 21.96 | 77.65 | 2.12                         |
| cmeA       | 36B |       |       | LowEfficiency, CtIsSmall, Ci |
| cmlA1-01   | 36B | 36.26 | 85.58 | 1.69 MultipleMeltPeaks       |
| cmlA1-02   | 36B | 34.13 | 87.25 | 1.88 MultipleMeltPeaks       |
| cmr        | 36B | 37.69 | 78.63 | 1.75                         |
| cmx(A)     | 36B | 27.18 | 84.51 | 2 MultipleMeltPeaks          |
| cphA-01    | 36B | 29.44 | 88.11 | 1.97 MultipleMeltPeaks       |
| cphA-02    | 36B | 29.7  | 82.31 | 1.97                         |
| dfrA1      | 36B | 37.05 | 78.46 | 1.86 MultipleMeltPeaks       |
| dfrA12     | 36B |       |       | CurveFitFailed               |
| emrD       | 36B | 28.2  | 90.44 | 1.95                         |
| ereA       | 36B | 35.26 | 82.94 | 1.86                         |
| ereB       | 36B | 34.46 | 85.84 | 1.9                          |
| erm(34)    | 36B | 36.81 | 87.7  | 1.71                         |
| erm(35)    | 36B |       |       | LowEfficiency, CtIsSmall, S: |
| erm(36)    | 36B | 29.87 | 86.56 | 2.12                         |
| ermA       | 36B |       |       | CurveFitFailed               |
| ermA/ermTR | 36B |       |       | NoAmplification              |
| ermB       | 36B | 24.37 | 75.07 | 2.12                         |
| ermC       | 36B | 31.21 | 74.06 | 2.17                         |
| ermF       | 36B |       |       | LowEfficiency, CtIsSmall, S: |
| ermJ/ermD  | 36B | 37.04 | 87.05 | 1.67 MultipleMeltPeaks       |
| ermK-01    | 36B |       |       | CurveFitFailed               |
| ermK-02    | 36B | 35.75 | 85.2  | 1.81 MultipleMeltPeaks       |
| ermT-01    | 36B |       |       | LowEfficiency, CtIsSmall, S: |
| ermT-02    | 36B | 34.59 | 70.32 | 1.9 MultipleMeltPeaks        |
| ermX       | 36B | 34.9  | 82.95 | 1.76 MultipleMeltPeaks       |
| ermY       | 36B |       |       | LowEfficiency, CtIsSmall, S: |
| fabK       | 36B | 20.15 | 79.52 | 2.27                         |
| floR       | 36B |       |       | BadR2, LowEfficiency, CtIsS  |
| folA       | 36B | 39.77 | 81.6  | 1.59                         |
| fosB       | 36B |       |       | LowEfficiency, CtIsSmall, S: |
| fosX       | 36B |       |       | CurveFitFailed               |
| fox5       | 36B | 25.25 | 86.43 | 1.98 MultipleMeltPeaks       |
| imiR       | 36B |       |       | LowEfficiency, CtIsSmall, S: |
| ImrA-01    | 36B | 36.81 | 82.68 | 1.89                         |
| intl       | 36B | 29.6  | 84.87 | 1.99 MultipleMeltPeaks       |
| intl1      | 36B | 19.66 | 87.48 | 2.05                         |
| IS613      | 36B |       |       | BadR2, LowEfficiency, CtIsS  |
| lnuA-01    | 36B |       |       | CurveFitFailed               |
| lnuB-01    | 36B |       |       | CurveFitFailed               |
| lnuB-02    | 36B |       |       | LowEfficiency, CtIsSmall, Ci |

|                |     |       |       |      |                              |
|----------------|-----|-------|-------|------|------------------------------|
| lnuC           | 36B | 36.65 | 84.24 | 1.77 | MultipleMeltPeaks            |
| marR-01        | 36B | 30.07 | 89.13 | 1.91 | MultipleMeltPeaks            |
| matA/mel       | 36B | 16.35 | 77.81 | 2.13 |                              |
| mdet1          | 36B |       |       |      | CurveFitFailed               |
| mdtA           | 36B |       |       |      | CurveFitFailed               |
| mdtE/yhiU      | 36B | 31.47 | 84.85 | 1.9  |                              |
| mecA           | 36B |       |       |      | LowEfficiency, CtIsSmall, S: |
| mefA           | 36B | 15.67 | 80.73 | 2.08 |                              |
| mepA           | 36B | 26.04 | 81.09 | 1.99 | MultipleMeltPeaks            |
| mexA           | 36B | 36.29 | 82.32 | 1.75 |                              |
| mexD           | 36B | 29.61 | 80.1  | 1.92 | MultipleMeltPeaks            |
| mexE           | 36B | 34.62 | 90.06 | 1.86 | MultipleMeltPeaks            |
| mexF           | 36B | 25.66 | 89.32 | 2.15 | MultipleMeltPeaks            |
| mphA-01        | 36B | 28.67 | 87.78 | 1.99 | MultipleMeltPeaks            |
| mphA-02        | 36B | 27.08 | 87.78 | 1.82 |                              |
| mphB           | 36B |       |       |      | LowEfficiency, CtIsSmall, S: |
| mphC           | 36B | 38.48 | 76.69 | 1.69 |                              |
| msrA-01        | 36B |       |       |      | LowEfficiency, CtIsSmall, S: |
| msrC-01        | 36B |       |       |      | NoAmplification              |
| mtrC-01        | 36B | 30.64 | 82.99 | 1.97 | MultipleMeltPeaks            |
| mtrC-02        | 36B | 31.99 | 84.3  | 1.96 |                              |
| mtrD-02        | 36B | 26.38 | 81.87 | 1.96 |                              |
| mtrD-03        | 36B | 23.55 | 85.6  | 1.84 | MultipleMeltPeaks            |
| NDM1           | 36B |       |       |      | CurveFitFailed               |
| nimE           | 36B | 34.5  | 83.37 | 1.97 |                              |
| nisB           | 36B |       |       |      | LowEfficiency, CtIsSmall, S: |
| oleC           | 36B | 35.99 | 81.89 | 1.84 | MultipleMeltPeaks            |
| oprD           | 36B | 28.52 | 86.39 | 2.03 |                              |
| oprJ           | 36B | 29.21 | 91.62 | 2    |                              |
| pbp            | 36B |       |       |      | CurveFitFailed               |
| pbp2x          | 36B | 23.43 | 76.02 | 2.1  |                              |
| Pbp5           | 36B |       |       |      | LowEfficiency, CtIsSmall, S: |
| penA           | 36B | 31.37 | 89.97 | 1.85 | MultipleMeltPeaks            |
| pikR1          | 36B | 32.09 | 89.51 | 2.02 |                              |
| pikR2          | 36B | 29.33 | 84.85 | 2.11 |                              |
| pmrA           | 36B | 19.4  | 78.96 | 2.15 |                              |
| pncA           | 36B | 23.84 | 89.47 | 1.85 |                              |
| putative multi | 36B | 30.79 | 84.19 | 1.96 |                              |
| qac            | 36B | 34.65 | 78.83 | 1.95 |                              |
| qacA           | 36B |       |       |      | CurveFitFailed               |
| qacA/qacB      | 36B |       |       |      | CurveFitFailed               |
| qacEdelta1-0   | 36B |       |       |      | LowEfficiency, CtIsSmall, S: |
| qacEdelta1-0   | 36B | 31.17 | 86.58 | 1.97 | MultipleMeltPeaks            |
| qacH-01        | 36B | 30.07 | 87.78 | 1.99 |                              |
| qacH-02        | 36B | 31.86 | 83.49 | 1.91 |                              |
| qnrA           | 36B | 30.7  | 80.63 | 2.01 |                              |

|              |     |       |       |      |                              |
|--------------|-----|-------|-------|------|------------------------------|
| rarD-02      | 36B |       |       |      | NoAmplification              |
| sat4         | 36B | 27.09 | 75.02 | 1.98 |                              |
| sdeB         | 36B | 37.22 | 80.49 | 1.85 |                              |
| spcN-01      | 36B | 36.98 | 85.07 | 1.76 |                              |
| speA         | 36B |       |       |      | LowEfficiency, CtIsSmall, Ci |
| str          | 36B |       |       |      | CurveFitFailed               |
| strA         | 36B |       |       |      | CurveFitFailed               |
| strB         | 36B | 34.18 | 85.08 | 1.83 |                              |
| sul1         | 36B | 32.19 | 89.47 | 1.84 |                              |
| sul2         | 36B | 33.26 | 81.52 | 1.88 |                              |
| sulA/foIP-01 | 36B | 18.13 | 80.95 | 2.04 |                              |
| sulA/foIP-03 | 36B | 18.33 | 83.46 | 2.05 |                              |
| tet(32)      | 36B | 26.81 | 80.8  | 1.98 |                              |
| tet(34)      | 36B |       |       |      | CurveFitFailed               |
| tet(35)      | 36B |       |       |      | NoAmplification              |
| tet(36)-A    | 36B |       |       |      | LowEfficiency, CtIsSmall, S: |
| tet(36)-B    | 36B |       |       |      | LowEfficiency, CtIsSmall, Ci |
| tet(37)      | 36B | 28.24 | 85.89 | 2    |                              |
| tetA-01      | 36B | 30.03 | 85.23 | 2.08 |                              |
| tetA-02      | 36B | 34.16 | 86.87 | 1.89 |                              |
| tetB-01      | 36B | 31.18 | 86.12 | 1.99 |                              |
| tetB-02      | 36B |       |       |      | CurveFitFailed               |
| tetC-01      | 36B |       |       |      | NoAmplification              |
| tetC-02      | 36B |       |       |      | LowEfficiency, CtIsSmall, Ci |
| tetD-01      | 36B |       |       |      | LowEfficiency, CtIsSmall, S: |
| tetD-02      | 36B | 36.61 | 76.33 | 1.9  |                              |
| tetE         | 36B |       |       |      | LowEfficiency, CtIsSmall, Ci |
| tetG-01      | 36B | 31.47 | 86.72 | 2.17 |                              |
| tetG-02      | 36B | 30.38 | 90.67 | 2.01 | MultipleMeltPeaks            |
| tetH         | 36B |       |       |      | LowEfficiency, CtIsSmall, Ci |
| tetJ         | 36B |       |       |      | CurveFitFailed               |
| tetK         | 36B |       |       |      | LowEfficiency, CtIsSmall, S: |
| tetL-01      | 36B | 33.44 | 87.38 | 1.86 |                              |
| tetL-02      | 36B | 30.63 | 84.98 | 1.95 | MultipleMeltPeaks            |
| tetM-01      | 36B | 17.32 | 76.41 | 2.03 |                              |
| tetM-02      | 36B | 17.21 | 77.63 | 2.06 |                              |
| tetO-01      | 36B |       |       |      | CurveFitFailed               |
| tetPA        | 36B |       |       |      | CurveFitFailed               |
| tetPB-01     | 36B | 36.22 | 87.55 | 1.78 |                              |
| tetPB-02     | 36B | 28.27 | 85.46 | 2.03 | MultipleMeltPeaks            |
| tetPB-03     | 36B |       |       |      | CurveFitFailed               |
| tetPB-05     | 36B |       |       |      | CurveFitFailed               |
| tetQ         | 36B | 23.31 | 76.72 | 2.05 |                              |
| tetR-02      | 36B | 29.73 | 89.92 | 1.99 |                              |
| tetR-03      | 36B |       |       |      | LowEfficiency, CtIsSmall, S: |
| tetS         | 36B | 34.99 | 85.2  | 2.05 |                              |

|             |     |       |       |      |                              |
|-------------|-----|-------|-------|------|------------------------------|
| tetT        | 36B |       |       |      | LowEfficiency, CtIsSmall, Ci |
| tetU-01     | 36B |       |       |      | LowEfficiency, CtIsSmall, Ci |
| tetV        | 36B |       |       |      | CurveFitFailed               |
| tetW-01     | 36B |       |       |      | LowEfficiency, CtIsSmall, S: |
| tetX        | 36B |       |       |      | CurveFitFailed               |
| tnpA-01     | 36B |       |       |      | LowEfficiency, CtIsSmall, Ci |
| tnpA-02     | 36B | 29.88 | 84.1  | 1.85 |                              |
| tnpA-03     | 36B | 28.14 | 78.32 | 2.15 |                              |
| tnpA-04     | 36B | 34.09 | 86.44 | 1.91 |                              |
| tnpA-05     | 36B | 28.37 | 80.56 | 1.92 | MultipleMeltPeaks            |
| tnpA-07     | 36B |       |       |      | LowEfficiency, CtIsSmall, Ci |
| tolC-01     | 36B |       |       |      | CurveFitFailed               |
| tolC-02     | 36B | 28.98 | 87.62 | 1.93 | MultipleMeltPeaks            |
| tolC-03     | 36B | 29.41 | 85.91 | 1.98 |                              |
| Tp614       | 36B | 33.83 | 84.78 | 1.93 | MultipleMeltPeaks            |
| ttgA        | 36B | 37.36 | 84.82 | 1.75 |                              |
| ttgB        | 36B | 31.49 | 91.58 | 1.99 | MultipleMeltPeaks            |
| vanA        | 36B |       |       |      | CurveFitFailed               |
| vanB-01     | 36B | 30.61 | 83.89 | 2.08 |                              |
| vanC-01     | 36B |       |       |      | CurveFitFailed               |
| vanC-02     | 36B |       |       |      | LowEfficiency, CtIsSmall, S: |
| vanC-03     | 36B | 25.57 | 87.33 | 1.95 |                              |
| vanC1       | 36B |       |       |      | CurveFitFailed               |
| vanC2/vanC3 | 36B | 34.73 | 84.71 | 2.04 | MultipleMeltPeaks            |
| vanG        | 36B |       |       |      | LowEfficiency, CtIsSmall, Ci |
| vanHB       | 36B | 33.2  | 85.24 | 1.94 | MultipleMeltPeaks            |
| vanHD       | 36B | 35.43 | 74.43 | 1.87 | MultipleMeltPeaks            |
| vanRA-01    | 36B |       |       |      | CurveFitFailed               |
| vanRA-02    | 36B |       |       |      | LowEfficiency, CtIsSmall, S: |
| vanRB       | 36B | 31.04 | 87.59 | 2.01 |                              |
| vanRC       | 36B |       |       |      | CurveFitFailed               |
| vanRC4      | 36B |       |       |      | CurveFitFailed               |
| vanRD       | 36B |       |       |      | LowEfficiency, CtIsSmall, Ci |
| vanSA       | 36B |       |       |      | LowEfficiency, CtIsSmall, S: |
| vanSB       | 36B | 29.52 | 74.69 | 1.99 |                              |
| vanSC-01    | 36B | 30.64 | 77.31 | 2.11 |                              |
| vanSC-02    | 36B | 31.21 | 76.16 | 1.91 | MultipleMeltPeaks            |
| vanTC-01    | 36B |       |       |      | CurveFitFailed               |
| vanTC-02    | 36B | 28.67 | 86.39 | 1.93 | MultipleMeltPeaks            |
| vanTE       | 36B | 31.45 | 88.63 | 1.91 |                              |
| vanTG       | 36B |       |       |      | LowEfficiency, CtIsSmall, Ci |
| vanWB       | 36B |       |       |      | LowEfficiency, CtIsSmall, Ci |
| vanWG       | 36B | 36.9  | 74.67 | 1.97 |                              |
| vanXA       | 36B |       |       |      | CurveFitFailed               |
| vanXB       | 36B |       |       |      | CurveFitFailed               |
| vanXD       | 36B | 31.61 | 75.38 | 2.03 |                              |

|              |     |       |       |      |                              |
|--------------|-----|-------|-------|------|------------------------------|
| vanYB        | 36B |       |       |      | LowEfficiency, CtIsSmall, S: |
| vanYD-01     | 36B | 29.24 | 89.04 | 1.85 |                              |
| vanYD-02     | 36B |       |       |      | LowEfficiency, CtIsSmall, S: |
| vatB-01      | 36B |       |       |      | CurveFitFailed               |
| vatB-02      | 36B | 32.98 | 81.9  | 2.01 |                              |
| vatC-01      | 36B | 33.67 | 81.31 | 1.92 | MultipleMeltPeaks            |
| vatC-02      | 36B | 36.56 | 83.29 | 1.9  | MultipleMeltPeaks            |
| vatE-01      | 36B | 29.91 | 77.16 | 2.16 |                              |
| vatE-02      | 36B | 37.45 | 75.46 | 2.04 |                              |
| vgaA-01      | 36B | 33.72 | 78.01 | 1.98 |                              |
| vgaA-02      | 36B |       |       |      | CurveFitFailed               |
| vgb-01       | 36B | 30.98 | 87.56 | 1.99 |                              |
| vgbB-01      | 36B |       |       |      | CurveFitFailed               |
| vgbB-02      | 36B |       |       |      | CurveFitFailed               |
| yceE/mdtG-0  | 36B |       |       |      | BadR2, LowEfficiency, CtIsS  |
| yceE/mdtG-0  | 36B |       |       |      | CurveFitFailed               |
| yceL/mdtH-0  | 36B | 27.25 | 87.4  | 1.93 |                              |
| yceL/mdtH-0  | 36B |       |       |      | LowEfficiency, CtIsSmall, Ci |
| yceL/mdtH-0  | 36B | 33.5  | 87.93 | 1.89 |                              |
| yidY/mdtL-01 | 36B | 29.6  | 81.7  | 1.97 | MultipleMeltPeaks            |
| yidY/mdtL-02 | 36B |       |       |      | CurveFitFailed               |































| Assay           | Sample | Ct | Tm    | Efficiency | flag                         |
|-----------------|--------|----|-------|------------|------------------------------|
| 16S rRNA        | 36C    |    | 12.12 | 82.3       | 2.01                         |
| aac             | 36C    |    | 32.27 | 85.39      | 1.97                         |
| aac(6')-Ib(akz) | 36C    |    |       |            | LowEfficiency, CtIsSmall, S: |
| aac(6')-Ib(akz) | 36C    |    | 31.62 | 89.3       | 1.97                         |
| aac(6')-Ib(akz) | 36C    |    | 32.96 | 84.83      | 1.95                         |
| aac(6')-II      | 36C    |    | 40.84 | 81.34      | 1.61 MultipleMeltPeaks       |
| aac(6')I1       | 36C    |    | 34.1  | 91.94      | 1.84                         |
| aacA/aphD       | 36C    |    |       |            | CurveFitFailed               |
| aacC            | 36C    |    | 27.04 | 88.67      | 1.88                         |
| aacC1           | 36C    |    | 37.53 | 82.76      | 1.75                         |
| aacC2           | 36C    |    |       |            | NoAmplification              |
| aacC4           | 36C    |    | 30.75 | 92.39      | 2.09                         |
| aadA-01         | 36C    |    |       |            | NoAmplification              |
| aadA-02         | 36C    |    |       |            | CurveFitFailed               |
| aadA-1-01       | 36C    |    | 24.04 | 79.96      | 1.94                         |
| aadA-1-02       | 36C    |    | 23.59 | 76.61      | 2.02                         |
| aadA1           | 36C    |    | 39.01 | 81.12      | 1.75                         |
| aadA2-01        | 36C    |    |       |            | CurveFitFailed               |
| aadA2-02        | 36C    |    | 35.24 | 75.07      | 1.86                         |
| aadA2-03        | 36C    |    | 34.79 | 80.51      | 1.91                         |
| aadA5-01        | 36C    |    |       |            | CurveFitFailed               |
| aadA5-02        | 36C    |    | 32.73 | 87.37      | 1.94 MultipleMeltPeaks       |
| aadA9-01        | 36C    |    | 37.94 | 62.7       | 1.86 MultipleMeltPeaks       |
| aadA9-02        | 36C    |    | 35.54 | 86.69      | 1.9                          |
| aadD            | 36C    |    |       |            | NoAmplification              |
| aadE            | 36C    |    | 24.86 | 72.34      | 2.06                         |
| acrA-01         | 36C    |    | 30.75 | 82.55      | 1.96 MultipleMeltPeaks       |
| acrA-02         | 36C    |    | 31.13 | 84.72      | 1.91                         |
| acrA-03         | 36C    |    | 37.11 | 88.01      | 1.65 MultipleMeltPeaks       |
| acrA-04         | 36C    |    | 30.94 | 89.36      | 1.9                          |
| acrA-05         | 36C    |    | 27.19 | 88.84      | 1.94                         |
| acrB-01         | 36C    |    | 35.59 | 75.89      | 1.97                         |
| acrF            | 36C    |    | 34.94 | 82.02      | 1.88                         |
| acrR-01         | 36C    |    | 37.44 | 90.57      | 1.73 MultipleMeltPeaks       |
| acrR-02         | 36C    |    | 36.92 | 76.87      | 1.87 MultipleMeltPeaks       |
| Actin           | 36C    |    | 24.82 | 83.88      | 1.89 MultipleMeltPeaks       |
| adeA            | 36C    |    | 36.94 | 80.39      | 1.85                         |
| ampC-01         | 36C    |    | 29.71 | 80.55      | 1.99                         |
| ampC-02         | 36C    |    | 31.98 | 89.21      | 1.91                         |
| ampC-04         | 36C    |    | 32.31 | 78.49      | 1.82 MultipleMeltPeaks       |
| ampC-05         | 36C    |    |       |            | CurveFitFailed               |
| ampC-06         | 36C    |    | 36.6  | 76.46      | 1.87                         |
| ampC-07         | 36C    |    |       |            | CurveFitFailed               |
| ampC-09         | 36C    |    |       |            | CurveFitFailed               |
| ampC/blaDH      | 36C    |    | 33.7  | 87.78      | 1.91 MultipleMeltPeaks       |

|                            |     |       |       |      |                              |
|----------------------------|-----|-------|-------|------|------------------------------|
| aph                        | 36C |       |       |      | LowEfficiency, CtIsSmall, S: |
| aph(2')-Id-01              | 36C |       |       |      | LowEfficiency, CtIsSmall, C: |
| aph(2')-Id-02              | 36C |       |       |      | LowEfficiency, CtIsSmall, S: |
| aph6ia                     | 36C | 38.47 | 76.05 | 1.71 |                              |
| aphA1(aka k <sub>z</sub> ) | 36C |       |       |      | LowEfficiency, CtIsSmall, S: |
| bacA-01                    | 36C | 35.33 | 79.97 | 1.95 |                              |
| bacA-02                    | 36C | 29.7  | 83.62 | 1.79 |                              |
| BETA-globin                | 36C | 25.86 | 84.1  | 1.99 |                              |
| bla-ACC-1                  | 36C |       |       |      | CurveFitFailed               |
| bla-L1                     | 36C | 32.36 | 82.06 | 1.97 | MultipleMeltPeaks            |
| bla1                       | 36C |       |       |      | LowEfficiency, CtIsSmall, S: |
| blaCMY                     | 36C | 29.64 | 80.67 | 1.99 |                              |
| blaCMY2-01                 | 36C | 36.04 | 74.95 | 1.92 |                              |
| blaCMY2-02                 | 36C | 32.64 | 81.98 | 1.99 |                              |
| blaCTX-M-01                | 36C | 34.71 | 85.21 | 2.1  |                              |
| blaCTX-M-02                | 36C | 32.17 | 89.16 | 1.86 |                              |
| blaCTX-M-03                | 36C |       |       |      | CurveFitFailed               |
| blaCTX-M-04                | 36C | 30.78 | 89.02 | 1.98 |                              |
| blaCTX-M-05                | 36C | 33.32 | 76.12 | 1.73 |                              |
| blaCTX-M-06                | 36C |       |       |      | NoAmplification              |
| blaGES                     | 36C |       |       |      | NoAmplification              |
| blaIMP-01                  | 36C |       |       |      | NoAmplification              |
| blaIMP-02                  | 36C |       |       |      | CurveFitFailed               |
| blaMOX/blaC                | 36C |       |       |      | CurveFitFailed               |
| blaOCH                     | 36C |       |       |      | NoAmplification              |
| blaOKP                     | 36C |       |       |      | NoAmplification              |
| blaOXA1/blaC               | 36C |       |       |      | LowEfficiency, CtIsSmall, C: |
| blaOXA10-01                | 36C |       |       |      | CurveFitFailed               |
| blaOXA10-02                | 36C |       |       |      | LowEfficiency, CtIsSmall, C: |
| blaOXY                     | 36C | 32.52 | 89.12 | 1.81 |                              |
| blaPAO                     | 36C | 26.95 | 82.63 | 1.94 |                              |
| blaPER                     | 36C |       |       |      | CurveFitFailed               |
| blaPSE                     | 36C | 38.12 | 64.55 | 1.42 | MultipleMeltPeaks            |
| blaROB                     | 36C | 33.92 | 82.03 | 1.89 |                              |
| blaSFO                     | 36C | 27.97 | 86.87 | 1.93 |                              |
| blaSHV-01                  | 36C | 33.07 | 89.05 | 1.77 |                              |
| blaSHV-02                  | 36C | 34.25 | 81.88 | 1.96 | MultipleMeltPeaks            |
| blaTEM                     | 36C | 30.52 | 79.55 | 2.04 |                              |
| blaTLA                     | 36C |       |       |      | LowEfficiency, CtIsSmall, S: |
| blaVEB                     | 36C |       |       |      | NoAmplification              |
| blaVIM                     | 36C |       |       |      | NoAmplification              |
| blaZ                       | 36C |       |       |      | CurveFitFailed               |
| carB                       | 36C | 39.2  | 85.96 | 1.77 | MultipleMeltPeaks            |
| catA1                      | 36C |       |       |      | NoAmplification              |
| catB3                      | 36C |       |       |      | NoAmplification              |
| catB8                      | 36C | 36.88 | 78.9  | 1.83 | MultipleMeltPeaks            |

|            |     |       |       |      |                              |
|------------|-----|-------|-------|------|------------------------------|
| ceoA       | 36C | 31.15 | 85.96 | 1.94 |                              |
| cepA       | 36C |       |       |      | NoAmplification              |
| cfiA       | 36C |       |       |      | NoAmplification              |
| cfr        | 36C |       |       |      | CurveFitFailed               |
| cfxA       | 36C | 20.02 | 77.71 | 2.08 |                              |
| cmeA       | 36C | 34.73 | 72.65 | 1.95 |                              |
| cmlA1-01   | 36C | 36.63 | 85.22 | 1.86 | MultipleMeltPeaks            |
| cmlA1-02   | 36C | 31.96 | 89.88 | 1.94 | MultipleMeltPeaks            |
| cmr        | 36C |       |       |      | CurveFitFailed               |
| cmx(A)     | 36C | 31.22 | 84.63 | 1.99 | MultipleMeltPeaks            |
| cphA-01    | 36C | 34.89 | 87.96 | 1.86 |                              |
| cphA-02    | 36C | 33.46 | 88.84 | 1.89 | MultipleMeltPeaks            |
| dfrA1      | 36C |       |       |      | NoAmplification              |
| dfrA12     | 36C |       |       |      | CurveFitFailed               |
| emrD       | 36C | 26.86 | 90.64 | 1.82 |                              |
| ereA       | 36C |       |       |      | BadR2, LowEfficiency, CtIsS  |
| ereB       | 36C | 36.5  | 83.86 | 1.83 |                              |
| erm(34)    | 36C | 34.43 | 89.91 | 1.89 |                              |
| erm(35)    | 36C |       |       |      | LowEfficiency, CtIsSmall, Ci |
| erm(36)    | 36C | 33.13 | 84.47 | 2.04 |                              |
| ermA       | 36C |       |       |      | LowEfficiency, CtIsSmall, S; |
| ermA/ermTR | 36C |       |       |      | NoAmplification              |
| ermB       | 36C | 22.72 | 75.18 | 2.11 |                              |
| ermC       | 36C |       |       |      | LowEfficiency, CtIsSmall, Ci |
| ermF       | 36C |       |       |      | LowEfficiency, CtIsSmall, Ci |
| ermJ/ermD  | 36C |       |       |      | CurveFitFailed               |
| ermK-01    | 36C | 35.01 | 76.08 | 1.94 |                              |
| ermK-02    | 36C | 33.07 | 77.1  | 1.96 |                              |
| ermT-01    | 36C |       |       |      | LowEfficiency, CtIsSmall, Ci |
| ermT-02    | 36C | 29.43 | 72.35 | 2.12 |                              |
| ermX       | 36C | 26.83 | 83.68 | 1.9  |                              |
| ermY       | 36C |       |       |      | CurveFitFailed               |
| fabK       | 36C | 18.06 | 79.72 | 2.13 |                              |
| floR       | 36C | 33.88 | 87.26 | 1.89 |                              |
| folA       | 36C |       |       |      | NoAmplification              |
| fosB       | 36C |       |       |      | LowEfficiency, CtIsSmall, S; |
| fosX       | 36C |       |       |      | LowEfficiency, CtIsSmall, Ci |
| fox5       | 36C | 28.61 | 86.72 | 1.9  | MultipleMeltPeaks            |
| imiR       | 36C |       |       |      | NoAmplification              |
| ImrA-01    | 36C |       |       |      | NoAmplification              |
| intl       | 36C | 32.34 | 86.29 | 1.95 |                              |
| intl1      | 36C | 22.6  | 88.78 | 2.05 | MultipleMeltPeaks            |
| IS613      | 36C | 25.04 | 79.82 | 2.07 |                              |
| lnuA-01    | 36C |       |       |      | LowEfficiency, CtIsSmall, S; |
| lnuB-01    | 36C |       |       |      | CurveFitFailed               |
| lnuB-02    | 36C |       |       |      | LowEfficiency, CtIsSmall, Ci |

|                |     |       |       |      |                              |
|----------------|-----|-------|-------|------|------------------------------|
| lnuC           | 36C |       |       |      | CurveFitFailed               |
| marR-01        | 36C | 36.15 | 87.13 | 1.83 |                              |
| matA/mel       | 36C | 14.29 | 77.92 | 2.09 |                              |
| mdet1          | 36C |       |       |      | LowEfficiency, CtIsSmall, Ci |
| mdtA           | 36C |       |       |      | CurveFitFailed               |
| mdtE/yhiU      | 36C | 32.81 | 91.43 | 1.77 |                              |
| mecA           | 36C | 29.35 | 75    | 2.06 |                              |
| mefA           | 36C | 13.74 | 80.71 | 2.03 |                              |
| mepA           | 36C | 26.65 | 91.1  | 2.01 |                              |
| mexA           | 36C | 25.96 | 85.22 | 1.92 |                              |
| mexD           | 36C | 32.17 | 79.78 | 2.05 |                              |
| mexE           | 36C | 27.1  | 83.93 | 1.93 |                              |
| mexF           | 36C | 27.03 | 89.62 | 1.91 | MultipleMeltPeaks            |
| mphA-01        | 36C | 28.19 | 92.87 | 1.9  | MultipleMeltPeaks            |
| mphA-02        | 36C | 30.35 | 88.88 | 1.9  |                              |
| mphB           | 36C | 33.6  | 88.77 | 1.95 |                              |
| mphC           | 36C |       |       |      | LowEfficiency, CtIsSmall, Ci |
| msrA-01        | 36C |       |       |      | CurveFitFailed               |
| msrC-01        | 36C |       |       |      | NoAmplification              |
| mtrC-01        | 36C | 29.15 | 82.88 | 1.92 |                              |
| mtrC-02        | 36C |       |       |      | CurveFitFailed               |
| mtrD-02        | 36C | 26.92 | 81.78 | 2.02 |                              |
| mtrD-03        | 36C | 26.13 | 82.04 | 1.84 |                              |
| NDM1           | 36C |       |       |      | LowEfficiency, CtIsSmall, Ci |
| nimE           | 36C |       |       |      | BadR2, LowEfficiency, CtIsS  |
| nisB           | 36C |       |       |      | CurveFitFailed               |
| oleC           | 36C | 34.27 | 91.92 | 1.81 |                              |
| oprD           | 36C | 26.87 | 89.07 | 1.89 | MultipleMeltPeaks            |
| oprJ           | 36C | 26.21 | 92.03 | 1.85 | MultipleMeltPeaks            |
| pbp            | 36C |       |       |      | LowEfficiency, CtIsSmall, Ci |
| pbp2x          | 36C |       |       |      | NoAmplification              |
| Pbp5           | 36C |       |       |      | LowEfficiency, CtIsSmall, Ci |
| penA           | 36C | 30.37 | 90.29 | 1.79 |                              |
| pikR1          | 36C | 28.47 | 89.62 | 1.9  |                              |
| pikR2          | 36C | 32.26 | 86.6  | 1.79 |                              |
| pmrA           | 36C | 20.95 | 79.26 | 2.09 |                              |
| pncA           | 36C | 27.28 | 89.53 | 1.95 |                              |
| putative multi | 36C |       |       |      | CurveFitFailed               |
| qac            | 36C |       |       |      | LowEfficiency, CtIsSmall, S: |
| qacA           | 36C |       |       |      | CurveFitFailed               |
| qacA/qacB      | 36C |       |       |      | NoAmplification              |
| qacEdelta1-0   | 36C |       |       |      | LowEfficiency, CtIsSmall, Ci |
| qacEdelta1-0   | 36C | 30.78 | 79.96 | 2    |                              |
| qacH-01        | 36C | 32.2  | 88.04 | 1.97 | MultipleMeltPeaks            |
| qacH-02        | 36C |       |       |      | NoAmplification              |
| qnrA           | 36C |       |       |      | NoAmplification              |



|              |     |       |       |      |                              |
|--------------|-----|-------|-------|------|------------------------------|
| rarD-02      | 36C |       |       |      | NoAmplification              |
| sat4         | 36C | 24.01 | 75.14 | 1.99 |                              |
| sdeB         | 36C |       |       |      | CurveFitFailed               |
| spcN-01      | 36C |       |       |      | CurveFitFailed               |
| speA         | 36C |       |       |      | NoAmplification              |
| str          | 36C |       |       |      | CurveFitFailed               |
| strA         | 36C |       |       |      | BadR2, LowEfficiency, CtIsS  |
| strB         | 36C | 28.24 | 84    | 1.93 |                              |
| sul1         | 36C |       |       |      | NoAmplification              |
| sul2         | 36C | 37.43 | 84.39 | 1.77 |                              |
| sulA/foIP-01 | 36C | 17.32 | 81.06 | 2.03 |                              |
| sulA/foIP-03 | 36C | 16.26 | 83.37 | 1.99 |                              |
| tet(32)      | 36C | 29.59 | 80.63 | 1.97 |                              |
| tet(34)      | 36C | 33.61 | 75.52 | 2    |                              |
| tet(35)      | 36C |       |       |      | NoAmplification              |
| tet(36)-A    | 36C |       |       |      | NoAmplification              |
| tet(36)-B    | 36C |       |       |      | LowEfficiency, CtIsSmall, Ci |
| tet(37)      | 36C | 28.75 | 76.43 | 1.97 |                              |
| tetA-01      | 36C |       |       |      | NoAmplification              |
| tetA-02      | 36C | 30.29 | 86.9  | 1.93 |                              |
| tetB-01      | 36C |       |       |      | CurveFitFailed               |
| tetB-02      | 36C |       |       |      | LowEfficiency, CtIsSmall, S: |
| tetC-01      | 36C |       |       |      | NoAmplification              |
| tetC-02      | 36C |       |       |      | LowEfficiency, CtIsSmall, S: |
| tetD-01      | 36C |       |       |      | LowEfficiency, CtIsSmall, Ci |
| tetD-02      | 36C |       |       |      | CurveFitFailed               |
| tetE         | 36C |       |       |      | NoAmplification              |
| tetG-01      | 36C | 32.29 | 87.98 | 1.97 |                              |
| tetG-02      | 36C | 32.26 | 88.91 | 2.01 |                              |
| tetH         | 36C |       |       |      | NoAmplification              |
| tetJ         | 36C |       |       |      | LowEfficiency, CtIsSmall, S: |
| tetK         | 36C |       |       |      | LowEfficiency, CtIsSmall, Ci |
| tetL-01      | 36C |       |       |      | NoAmplification              |
| tetL-02      | 36C | 34.71 | 82.88 | 1.91 |                              |
| tetM-01      | 36C | 18.02 | 76.26 | 2    |                              |
| tetM-02      | 36C | 18.29 | 77.47 | 2.03 |                              |
| tetO-01      | 36C |       |       |      | CurveFitFailed               |
| tetPA        | 36C |       |       |      | NoAmplification              |
| tetPB-01     | 36C | 37.07 | 79.44 | 1.89 |                              |
| tetPB-02     | 36C | 30.96 | 92.42 | 2.03 | MultipleMeltPeaks            |
| tetPB-03     | 36C |       |       |      | LowEfficiency, CtIsSmall, Ci |
| tetPB-05     | 36C |       |       |      | LowEfficiency, CtIsSmall, Ci |
| tetQ         | 36C | 22.53 | 76.88 | 2.03 |                              |
| tetR-02      | 36C | 29.1  | 89.6  | 1.93 | MultipleMeltPeaks            |
| tetR-03      | 36C |       |       |      | NoAmplification              |
| tetS         | 36C | 35.31 | 79.28 | 1.91 |                              |

|             |     |       |       |      |                                          |
|-------------|-----|-------|-------|------|------------------------------------------|
| tetT        | 36C |       |       |      | NoAmplification                          |
| tetU-01     | 36C |       |       |      | NoAmplification                          |
| tetV        | 36C | 30.77 | 89.51 | 1.85 |                                          |
| tetW-01     | 36C |       |       |      | CurveFitFailed                           |
| tetX        | 36C |       |       |      | CurveFitFailed                           |
| tnpA-01     | 36C |       |       |      | LowEfficiency, CtIsSmall, Ci             |
| tnpA-02     | 36C | 33.25 | 84.93 | 1.84 |                                          |
| tnpA-03     | 36C | 39.21 | 73.67 | 1.78 |                                          |
| tnpA-04     | 36C | 38.33 | 88.76 | 1.73 | MultipleMeltPeaks                        |
| tnpA-05     | 36C | 27.77 | 80.84 | 1.93 |                                          |
| tnpA-07     | 36C |       |       |      | LowEfficiency, CtIsSmall, Ci             |
| tolC-01     | 36C |       |       |      | CurveFitFailed                           |
| tolC-02     | 36C | 33.34 | 87.53 | 1.89 |                                          |
| tolC-03     | 36C | 34.5  | 83.48 | 1.89 | MultipleMeltPeaks                        |
| Tp614       | 36C | 34.09 | 83.32 | 1.9  |                                          |
| ttgA        | 36C | 31.71 | 84.44 | 1.91 |                                          |
| ttgB        | 36C |       |       |      | LowEfficiency, CtIsSmall, Ci             |
| vanA        | 36C |       |       |      | NoAmplification                          |
| vanB-01     | 36C | 32.93 | 89.82 | 1.89 |                                          |
| vanC-01     | 36C | 34.05 | 73.63 | 2.1  |                                          |
| vanC-02     | 36C |       |       |      | CurveFitFailed                           |
| vanC-03     | 36C | 28.91 | 85.22 | 1.96 |                                          |
| vanC1       | 36C |       |       |      | LowEfficiency, CtIsSmall, Ci             |
| vanC2/vanC3 | 36C | 33.03 | 89.71 | 2    |                                          |
| vanG        | 36C |       |       |      | NoAmplification                          |
| vanHB       | 36C | 33.68 | 87.09 | 1.88 |                                          |
| vanHD       | 36C |       |       |      | CurveFitFailed                           |
| vanRA-01    | 36C |       |       |      | CurveFitFailed                           |
| vanRA-02    | 36C |       |       |      | NoAmplification                          |
| vanRB       | 36C | 32.29 | 84.76 | 2.03 |                                          |
| vanRC       | 36C |       |       |      | CurveFitFailed                           |
| vanRC4      | 36C |       |       |      | LowEfficiency, CtIsSmall, S <sub>c</sub> |
| vanRD       | 36C |       |       |      | NoAmplification                          |
| vanSA       | 36C |       |       |      | LowEfficiency, CtIsSmall, Ci             |
| vanSB       | 36C | 30.27 | 74.62 | 1.99 |                                          |
| vanSC-01    | 36C | 29.34 | 77.59 | 2.06 |                                          |
| vanSC-02    | 36C |       |       |      | NoAmplification                          |
| vanTC-01    | 36C |       |       |      | LowEfficiency, CtIsSmall, S <sub>c</sub> |
| vanTC-02    | 36C | 41.31 | 86.45 | 1.55 | MultipleMeltPeaks                        |
| vanTE       | 36C | 34.32 | 88.75 | 1.85 |                                          |
| vanTG       | 36C |       |       |      | NoAmplification                          |
| vanWB       | 36C |       |       |      | NoAmplification                          |
| vanWG       | 36C | 38.98 | 74.31 | 1.83 |                                          |
| vanXA       | 36C |       |       |      | CurveFitFailed                           |
| vanXB       | 36C |       |       |      | NoAmplification                          |
| vanXD       | 36C | 34.51 | 74.48 | 2.01 |                                          |

|              |     |       |       |      |                              |
|--------------|-----|-------|-------|------|------------------------------|
| vanYB        | 36C |       |       |      | CurveFitFailed               |
| vanYD-01     | 36C | 31.64 | 85.69 | 1.68 | MultipleMeltPeaks            |
| vanYD-02     | 36C |       |       |      | NoAmplification              |
| vatB-01      | 36C |       |       |      | LowEfficiency, CtIsSmall, Ct |
| vatB-02      | 36C |       |       |      | CurveFitFailed               |
| vatC-01      | 36C | 36.04 | 81.84 | 1.79 | MultipleMeltPeaks            |
| vatC-02      | 36C |       |       |      | LowEfficiency, CtIsSmall, Ct |
| vatE-01      | 36C | 30.4  | 76.49 | 2.06 |                              |
| vatE-02      | 36C |       |       |      | NoAmplification              |
| vgaA-01      | 36C |       |       |      | LowEfficiency, CtIsSmall, Ct |
| vgaA-02      | 36C |       |       |      | NoAmplification              |
| vgb-01       | 36C | 30.66 | 82.75 | 1.93 | MultipleMeltPeaks            |
| vgbB-01      | 36C |       |       |      | BadR2, LowEfficiency, CtIsS  |
| vgbB-02      | 36C |       |       |      | LowEfficiency, CtIsSmall, Ct |
| yceE/mdtG-0  | 36C |       |       |      | LowEfficiency, CtIsSmall, S  |
| yceE/mdtG-0  | 36C |       |       |      | NoAmplification              |
| yceL/mdtH-0  | 36C | 25.77 | 76.67 | 1.97 | MultipleMeltPeaks            |
| yceL/mdtH-0  | 36C |       |       |      | CurveFitFailed               |
| yceL/mdtH-0  | 36C | 34.7  | 84.44 | 1.75 |                              |
| yidY/mdtL-01 | 36C | 33.18 | 90.35 | 1.86 |                              |
| yidY/mdtL-02 | 36C |       |       |      | CurveFitFailed               |































| Assay          | Sample | Ct | Tm    | Efficiency | flag                         |
|----------------|--------|----|-------|------------|------------------------------|
| 16S rRNA       | 37A    |    | 18.91 | 82.27      | 1.96                         |
| aac            | 37A    |    | 30.6  | 83.37      | 1.96 MultipleMeltPeaks       |
| aac(6')-Ib(akz | 37A    |    | 40.24 | 64.62      | 1.79 MultipleMeltPeaks       |
| aac(6')-Ib(akz | 37A    |    | 32.54 | 86.04      | 1.98 MultipleMeltPeaks       |
| aac(6')-Ib(akz | 37A    |    | 29.23 | 85.23      | 1.97                         |
| aac(6')-II     | 37A    |    | 32.28 | 86.11      | 1.75 MultipleMeltPeaks       |
| aac(6')I1      | 37A    |    | 34.94 | 90.91      | 1.8                          |
| aacA/aphD      | 37A    |    |       |            | LowEfficiency, CtIsSmall, Ci |
| aacC           | 37A    |    | 30.3  | 90.34      | 1.99                         |
| aacC1          | 37A    |    |       |            | NoAmplification              |
| aacC2          | 37A    |    |       |            | NoAmplification              |
| aacC4          | 37A    |    | 30.91 | 83.58      | 1.92 MultipleMeltPeaks       |
| aadA-01        | 37A    |    | 39.19 | 64.14      | 1.8 MultipleMeltPeaks        |
| aadA-02        | 37A    |    | 34.18 | 80.33      | 1.92                         |
| aadA-1-01      | 37A    |    | 34.51 | 78.33      | 1.93 MultipleMeltPeaks       |
| aadA-1-02      | 37A    |    |       |            | CurveFitFailed               |
| aadA1          | 37A    |    | 33    | 85.46      | 2                            |
| aadA2-01       | 37A    |    | 35.33 | 89.01      | 1.76                         |
| aadA2-02       | 37A    |    | 32.04 | 75.43      | 2.03                         |
| aadA2-03       | 37A    |    |       |            | LowEfficiency, CtIsSmall, Ci |
| aadA5-01       | 37A    |    | 34.01 | 88.54      | 1.88 MultipleMeltPeaks       |
| aadA5-02       | 37A    |    | 31.64 | 77.64      | 2.03 MultipleMeltPeaks       |
| aadA9-01       | 37A    |    | 34.87 | 81.95      | 1.89 MultipleMeltPeaks       |
| aadA9-02       | 37A    |    | 34.54 | 80.57      | 1.93                         |
| aadD           | 37A    |    |       |            | NoAmplification              |
| aadE           | 37A    |    |       |            | NoAmplification              |
| acrA-01        | 37A    |    | 30.52 | 88.68      | 1.97                         |
| acrA-02        | 37A    |    | 37.86 | 85.58      | 1.73                         |
| acrA-03        | 37A    |    |       |            | LowEfficiency, CtIsSmall, Ci |
| acrA-04        | 37A    |    | 29.21 | 89.17      | 1.92                         |
| acrA-05        | 37A    |    | 29.61 | 88.56      | 1.94                         |
| acrB-01        | 37A    |    | 35.6  | 76.63      | 1.99                         |
| acrF           | 37A    |    | 30.28 | 82.2       | 1.98                         |
| acrR-01        | 37A    |    | 39.41 | 81.57      | 1.7 MultipleMeltPeaks        |
| acrR-02        | 37A    |    | 38.26 | 85.88      | 1.75 MultipleMeltPeaks       |
| Actin          | 37A    |    | 21.46 | 87.15      | 1.98                         |
| adeA           | 37A    |    |       |            | CurveFitFailed               |
| ampC-01        | 37A    |    | 31.87 | 78.18      | 2.01 MultipleMeltPeaks       |
| ampC-02        | 37A    |    | 38.45 | 86.66      | 1.71 MultipleMeltPeaks       |
| ampC-04        | 37A    |    | 32.22 | 78.62      | 1.88                         |
| ampC-05        | 37A    |    |       |            | NoAmplification              |
| ampC-06        | 37A    |    | 38.27 | 71.46      | 1.82 MultipleMeltPeaks       |
| ampC-07        | 37A    |    | 30.27 | 88.43      | 1.9                          |
| ampC-09        | 37A    |    |       |            | CurveFitFailed               |
| ampC/blaDH     | 37A    |    | 28.3  | 84.47      | 2                            |

|                            |     |       |       |      |                                          |
|----------------------------|-----|-------|-------|------|------------------------------------------|
| aph                        | 37A |       |       |      | LowEfficiency, CtIsSmall, Ci             |
| aph(2')-Id-01              | 37A |       |       |      | NoAmplification                          |
| aph(2')-Id-02              | 37A |       |       |      | LowEfficiency, CtIsSmall, Ci             |
| aph6ia                     | 37A | 32.15 | 84.91 | 1.94 | MultipleMeltPeaks                        |
| aphA1(aka k <sub>a</sub> ) | 37A | 33.23 | 83.11 | 1.95 |                                          |
| bacA-01                    | 37A |       |       |      | LowEfficiency, CtIsSmall, Ci             |
| bacA-02                    | 37A | 33.66 | 88.26 | 1.79 |                                          |
| BETA-globin                | 37A | 23.3  | 83.96 | 2.01 |                                          |
| bla-ACC-1                  | 37A | 33.17 | 86.6  | 1.93 |                                          |
| bla-L1                     | 37A | 27.65 | 83.67 | 1.91 |                                          |
| bla1                       | 37A |       |       |      | LowEfficiency, CtIsSmall, Ci             |
| blaCMY                     | 37A | 38.89 | 76.7  | 1.79 |                                          |
| blaCMY2-01                 | 37A | 32.48 | 85.23 | 2.03 |                                          |
| blaCMY2-02                 | 37A | 27.66 | 85.42 | 2    | MultipleMeltPeaks                        |
| blaCTX-M-01                | 37A | 35.33 | 85.7  | 1.84 |                                          |
| blaCTX-M-02                | 37A | 30.33 | 84.68 | 1.9  |                                          |
| blaCTX-M-03                | 37A | 36.8  | 81.13 | 1.84 | MultipleMeltPeaks                        |
| blaCTX-M-04                | 37A | 31.28 | 90.3  | 2.07 |                                          |
| blaCTX-M-05                | 37A | 34.99 | 87.14 | 1.73 |                                          |
| blaCTX-M-06                | 37A |       |       |      | NoAmplification                          |
| blaGES                     | 37A |       |       |      | NoAmplification                          |
| blaIMP-01                  | 37A |       |       |      | NoAmplification                          |
| blaIMP-02                  | 37A | 42.77 | 79.43 | 1.81 |                                          |
| blaMOX/blaC                | 37A | 44.64 | 82.34 | 1.64 |                                          |
| blaOCH                     | 37A |       |       |      | NoAmplification                          |
| blaOKP                     | 37A |       |       |      | NoAmplification                          |
| blaOXA1/blaC               | 37A |       |       |      | LowEfficiency, CtIsSmall, Ci             |
| blaOXA10-01                | 37A | 41.84 | 63.54 | 1.66 | MultipleMeltPeaks                        |
| blaOXA10-02                | 37A |       |       |      | LowEfficiency, CtIsSmall, S <sub>c</sub> |
| blaOXY                     | 37A | 34.53 | 89.29 | 1.73 |                                          |
| blaPAO                     | 37A | 33.91 | 85.59 | 1.83 |                                          |
| blaPER                     | 37A |       |       |      | CurveFitFailed                           |
| blaPSE                     | 37A |       |       |      | CurveFitFailed                           |
| blaROB                     | 37A | 36.47 | 92.02 | 1.74 |                                          |
| blaSFO                     | 37A | 31.71 | 89.2  | 1.93 | MultipleMeltPeaks                        |
| blaSHV-01                  | 37A | 36.9  | 89.79 | 1.58 | MultipleMeltPeaks                        |
| blaSHV-02                  | 37A | 31.09 | 82.12 | 2.06 |                                          |
| blaTEM                     | 37A | 36.94 | 74.13 | 1.89 |                                          |
| blaTLA                     | 37A |       |       |      | CurveFitFailed                           |
| blaVEB                     | 37A |       |       |      | LowEfficiency, CtIsSmall, Ci             |
| blaVIM                     | 37A |       |       |      | NoAmplification                          |
| blaZ                       | 37A |       |       |      | LowEfficiency, CtIsSmall, Ci             |
| carB                       | 37A | 40.05 | 82.32 | 1.72 | MultipleMeltPeaks                        |
| catA1                      | 37A |       |       |      | NoAmplification                          |
| catB3                      | 37A | 31.03 | 87.24 | 1.92 |                                          |
| catB8                      | 37A | 28.7  | 81.92 | 1.99 |                                          |

|            |     |       |       |      |                              |
|------------|-----|-------|-------|------|------------------------------|
| ceoA       | 37A | 27.35 | 82.32 | 1.94 |                              |
| cepA       | 37A | 38.76 | 85.87 | 1.8  |                              |
| cfiA       | 37A | 31.07 | 86.36 | 2.01 |                              |
| cfr        | 37A |       |       |      | LowEfficiency, CtIsSmall, S: |
| cfxA       | 37A | 21.88 | 77.57 | 2.09 |                              |
| cmeA       | 37A | 38.72 | 81.6  | 1.72 |                              |
| cmlA1-01   | 37A | 34.15 | 89.72 | 1.89 |                              |
| cmlA1-02   | 37A | 33.75 | 88.41 | 1.89 |                              |
| cmr        | 37A |       |       |      | CurveFitFailed               |
| cmx(A)     | 37A | 27.2  | 84.94 | 1.97 | MultipleMeltPeaks            |
| cphA-01    | 37A | 31.69 | 85.71 | 1.97 |                              |
| cphA-02    | 37A | 31.87 | 82.38 | 2.03 |                              |
| dfrA1      | 37A | 37.47 | 78.46 | 1.83 |                              |
| dfrA12     | 37A |       |       |      | CurveFitFailed               |
| emrD       | 37A | 31.22 | 91.29 | 1.95 |                              |
| ereA       | 37A | 38.62 | 82.63 | 1.7  | MultipleMeltPeaks            |
| ereB       | 37A | 38.14 | 80.46 | 1.75 |                              |
| erm(34)    | 37A |       |       |      | NoAmplification              |
| erm(35)    | 37A |       |       |      | LowEfficiency, CtIsSmall, Ci |
| erm(36)    | 37A | 34.23 | 81.2  | 2.03 |                              |
| ermA       | 37A |       |       |      | LowEfficiency, CtIsSmall, Ci |
| ermA/ermTR | 37A |       |       |      | NoAmplification              |
| ermB       | 37A | 24.3  | 75.07 | 2.11 |                              |
| ermC       | 37A | 36.5  | 88.59 | 1.84 | MultipleMeltPeaks            |
| ermF       | 37A |       |       |      | LowEfficiency, CtIsSmall, S: |
| ermJ/ermD  | 37A |       |       |      | LowEfficiency, CtIsSmall, Ci |
| ermK-01    | 37A | 38.41 | 83.2  | 1.85 |                              |
| ermK-02    | 37A | 34.18 | 76.89 | 1.94 |                              |
| ermT-01    | 37A |       |       |      | LowEfficiency, CtIsSmall, Ci |
| ermT-02    | 37A | 32.52 | 79.57 | 2.07 |                              |
| ermX       | 37A | 27.15 | 83.63 | 1.88 |                              |
| ermY       | 37A |       |       |      | LowEfficiency, CtIsSmall, Ci |
| fabK       | 37A | 24.91 | 79.24 | 2.09 |                              |
| floR       | 37A | 36.32 | 86.7  | 1.75 |                              |
| folA       | 37A | 37.57 | 76.7  | 1.77 |                              |
| fosB       | 37A |       |       |      | LowEfficiency, CtIsSmall, S: |
| fosX       | 37A |       |       |      | NoAmplification              |
| fox5       | 37A | 25.29 | 86.87 | 1.97 | MultipleMeltPeaks            |
| imiR       | 37A |       |       |      | CurveFitFailed               |
| ImrA-01    | 37A | 34.43 | 82.72 | 1.97 |                              |
| intl       | 37A | 28.26 | 86.94 | 1.99 | MultipleMeltPeaks            |
| intl1      | 37A | 20.22 | 87.1  | 2    |                              |
| IS613      | 37A | 24.43 | 79.98 | 2.05 |                              |
| lnuA-01    | 37A |       |       |      | LowEfficiency, CtIsSmall, S: |
| lnuB-01    | 37A |       |       |      | CurveFitFailed               |
| lnuB-02    | 37A |       |       |      | NoAmplification              |

|               |     |       |       |      |                              |
|---------------|-----|-------|-------|------|------------------------------|
| lnuC          | 37A | 34.01 | 84.57 | 1.74 |                              |
| marR-01       | 37A | 34.8  | 85.2  | 1.87 | MultipleMeltPeaks            |
| matA/mel      | 37A | 22.16 | 77.75 | 2.06 |                              |
| mdet1         | 37A |       |       |      | NoAmplification              |
| mdtA          | 37A | 36.31 | 82.34 | 1.75 |                              |
| mdtE/yhiU     | 37A | 39.9  | 89.6  | 1.55 | MultipleMeltPeaks            |
| mecA          | 37A |       |       |      | CurveFitFailed               |
| mefA          | 37A | 20.96 | 80.53 | 1.98 |                              |
| mepA          | 37A | 29.37 | 76.44 | 2.01 |                              |
| mexA          | 37A | 41.67 | 64.43 | 1.64 | MultipleMeltPeaks            |
| mexD          | 37A | 29.69 | 79.93 | 1.91 | MultipleMeltPeaks            |
| mexE          | 37A | 38.98 | 86.97 | 1.75 | MultipleMeltPeaks            |
| mexF          | 37A | 29.54 | 89.1  | 2.1  |                              |
| mphA-01       | 37A | 30.12 | 88.56 | 2.03 |                              |
| mphA-02       | 37A | 30.06 | 86.7  | 2.05 | MultipleMeltPeaks            |
| mphB          | 37A | 37.47 | 83.3  | 1.78 |                              |
| mphC          | 37A | 32.11 | 85.7  | 1.9  |                              |
| msrA-01       | 37A |       |       |      | LowEfficiency, CtIsSmall, Ci |
| msrC-01       | 37A |       |       |      | NoAmplification              |
| mtrC-01       | 37A |       |       |      | NoAmplification              |
| mtrC-02       | 37A | 32.9  | 82.87 | 2.05 |                              |
| mtrD-02       | 37A | 27.02 | 85.1  | 2.03 | MultipleMeltPeaks            |
| mtrD-03       | 37A | 29.96 | 83.42 | 1.92 |                              |
| NDM1          | 37A | 39.57 | 76.73 | 1.75 |                              |
| nimE          | 37A | 38.12 | 74.94 | 2.01 |                              |
| nisB          | 37A |       |       |      | NoAmplification              |
| oleC          | 37A | 32.66 | 93.4  | 1.91 | MultipleMeltPeaks            |
| oprD          | 37A | 28.49 | 86.62 | 2    | MultipleMeltPeaks            |
| oprJ          | 37A | 29.61 | 87.89 | 1.99 |                              |
| pbp           | 37A |       |       |      | LowEfficiency, CtIsSmall, S; |
| pbp2x         | 37A | 22.92 | 75.93 | 2.12 |                              |
| Pbp5          | 37A |       |       |      | LowEfficiency, CtIsSmall, Ci |
| penA          | 37A | 32.92 | 90.73 | 1.85 |                              |
| pikR1         | 37A | 32.35 | 77.44 | 1.98 |                              |
| pikR2         | 37A | 30.23 | 85.66 | 1.82 |                              |
| pmrA          | 37A | 22.9  | 78.92 | 2.14 |                              |
| pncA          | 37A | 31.31 | 90.23 | 1.93 | MultipleMeltPeaks            |
| putative mul1 | 37A | 32.77 | 84.06 | 1.97 |                              |
| qac           | 37A |       |       |      | LowEfficiency, CtIsSmall, Ci |
| qacA          | 37A |       |       |      | NoAmplification              |
| qacA/qacB     | 37A |       |       |      | CurveFitFailed               |
| qacEdelta1-0  | 37A |       |       |      | LowEfficiency, CtIsSmall, Ci |
| qacEdelta1-0  | 37A | 33.72 | 90.33 | 1.93 |                              |
| qacH-01       | 37A | 30.14 | 85.9  | 1.93 |                              |
| qacH-02       | 37A | 35.71 | 83.84 | 1.66 |                              |
| qnrA          | 37A | 35.18 | 80.01 | 1.89 | MultipleMeltPeaks            |

|              |     |       |       |      |                              |
|--------------|-----|-------|-------|------|------------------------------|
| rarD-02      | 37A |       |       |      | CurveFitFailed               |
| sat4         | 37A |       |       |      | LowEfficiency, CtIsSmall, Ci |
| sdeB         | 37A |       |       |      | LowEfficiency, CtIsSmall, Ci |
| spcN-01      | 37A | 36.65 | 84.03 | 1.85 |                              |
| speA         | 37A |       |       |      | NoAmplification              |
| str          | 37A |       |       |      | CurveFitFailed               |
| strA         | 37A | 35.62 | 86.68 | 1.81 |                              |
| strB         | 37A |       |       |      | CurveFitFailed               |
| sul1         | 37A | 33.46 | 89.14 | 1.82 |                              |
| sul2         | 37A | 29.83 | 85.67 | 1.99 |                              |
| sulA/foIP-01 | 37A | 21.83 | 81.25 | 2.02 |                              |
| sulA/foIP-03 | 37A | 22.69 | 83.54 | 2.03 |                              |
| tet(32)      | 37A | 28.79 | 81.11 | 1.97 |                              |
| tet(34)      | 37A | 32.71 | 75.44 | 2.01 |                              |
| tet(35)      | 37A |       |       |      | NoAmplification              |
| tet(36)-A    | 37A |       |       |      | CurveFitFailed               |
| tet(36)-B    | 37A |       |       |      | CurveFitFailed               |
| tet(37)      | 37A | 25.53 | 76.6  | 2    |                              |
| tetA-01      | 37A | 33.73 | 85.09 | 1.92 |                              |
| tetA-02      | 37A | 37.71 | 79.87 | 1.73 | MultipleMeltPeaks            |
| tetB-01      | 37A | 28.89 | 79.14 | 1.98 | MultipleMeltPeaks            |
| tetB-02      | 37A | 36.8  | 83.13 | 1.76 | MultipleMeltPeaks            |
| tetC-01      | 37A |       |       |      | NoAmplification              |
| tetC-02      | 37A |       |       |      | CurveFitFailed               |
| tetD-01      | 37A |       |       |      | CurveFitFailed               |
| tetD-02      | 37A |       |       |      | CurveFitFailed               |
| tetE         | 37A |       |       |      | NoAmplification              |
| tetG-01      | 37A | 32.37 | 75.99 | 1.98 |                              |
| tetG-02      | 37A | 37.84 | 89.63 | 1.7  | MultipleMeltPeaks            |
| tetH         | 37A |       |       |      | NoAmplification              |
| tetJ         | 37A |       |       |      | LowEfficiency, CtIsSmall, S: |
| tetK         | 37A |       |       |      | CurveFitFailed               |
| tetL-01      | 37A | 38.29 | 85.51 | 1.73 | MultipleMeltPeaks            |
| tetL-02      | 37A | 34.13 | 85.27 | 1.75 |                              |
| tetM-01      | 37A | 23.07 | 76.04 | 2.03 |                              |
| tetM-02      | 37A | 23.01 | 77.6  | 2.03 |                              |
| tetO-01      | 37A | 25.95 | 76.85 | 2.04 |                              |
| tetPA        | 37A |       |       |      | NoAmplification              |
| tetPB-01     | 37A | 37.43 | 87.76 | 1.78 | MultipleMeltPeaks            |
| tetPB-02     | 37A | 28.32 | 84.81 | 2.04 |                              |
| tetPB-03     | 37A |       |       |      | CurveFitFailed               |
| tetPB-05     | 37A |       |       |      | CurveFitFailed               |
| tetQ         | 37A | 26.05 | 76.88 | 2.01 |                              |
| tetR-02      | 37A | 30.17 | 86.16 | 1.86 | MultipleMeltPeaks            |
| tetR-03      | 37A | 29.31 | 76.11 | 1.99 |                              |
| tetS         | 37A | 37.28 | 80.88 | 1.87 |                              |

|             |     |       |       |      |                              |
|-------------|-----|-------|-------|------|------------------------------|
| tetT        | 37A |       |       |      | NoAmplification              |
| tetU-01     | 37A |       |       |      | NoAmplification              |
| tetV        | 37A |       |       |      | CurveFitFailed               |
| tetW-01     | 37A | 24.54 | 81.88 | 2    |                              |
| tetX        | 37A |       |       |      | CurveFitFailed               |
| tnpA-01     | 37A |       |       |      | LowEfficiency, CtIsSmall, Ci |
| tnpA-02     | 37A | 33.55 | 91.42 | 1.81 | MultipleMeltPeaks            |
| tnpA-03     | 37A | 33.46 | 74.94 | 2.15 |                              |
| tnpA-04     | 37A | 38.61 | 77.97 | 1.78 | MultipleMeltPeaks            |
| tnpA-05     | 37A | 33.21 | 75.65 | 1.92 |                              |
| tnpA-07     | 37A |       |       |      | LowEfficiency, CtIsSmall, Ci |
| tolC-01     | 37A | 37.12 | 81.22 | 1.74 | MultipleMeltPeaks            |
| tolC-02     | 37A | 29.79 | 83.64 | 1.97 | MultipleMeltPeaks            |
| tolC-03     | 37A | 29.13 | 85.54 | 1.92 |                              |
| Tp614       | 37A | 32.18 | 82.82 | 1.95 |                              |
| ttgA        | 37A | 37.58 | 90.95 | 1.7  |                              |
| ttgB        | 37A | 34.46 | 78.73 | 2    |                              |
| vanA        | 37A |       |       |      | NoAmplification              |
| vanB-01     | 37A | 31.54 | 83.03 | 1.92 | MultipleMeltPeaks            |
| vanC-01     | 37A |       |       |      | LowEfficiency, CtIsSmall, Ci |
| vanC-02     | 37A |       |       |      | LowEfficiency, CtIsSmall, Ci |
| vanC-03     | 37A | 26.49 | 85.73 | 1.93 | MultipleMeltPeaks            |
| vanC1       | 37A |       |       |      | NoAmplification              |
| vanC2/vanC3 | 37A | 31.37 | 82.82 | 2.04 | MultipleMeltPeaks            |
| vanG        | 37A |       |       |      | BadR2, CtIsSmall, Saturatio  |
| vanHB       | 37A | 36.47 | 89    | 1.78 |                              |
| vanHD       | 37A | 34.64 | 83.77 | 1.89 |                              |
| vanRA-01    | 37A |       |       |      | NoAmplification              |
| vanRA-02    | 37A |       |       |      | NoAmplification              |
| vanRB       | 37A | 32.4  | 87.45 | 2    |                              |
| vanRC       | 37A |       |       |      | LowEfficiency, CtIsSmall, Ci |
| vanRC4      | 37A |       |       |      | LowEfficiency, CtIsSmall, Ci |
| vanRD       | 37A |       |       |      | NoAmplification              |
| vanSA       | 37A |       |       |      | CurveFitFailed               |
| vanSB       | 37A | 30.49 | 74.57 | 2.04 |                              |
| vanSC-01    | 37A |       |       |      | CurveFitFailed               |
| vanSC-02    | 37A |       |       |      | NoAmplification              |
| vanTC-01    | 37A |       |       |      | LowEfficiency, CtIsSmall, Ci |
| vanTC-02    | 37A | 33.48 | 81.1  | 1.92 |                              |
| vanTE       | 37A | 34.3  | 76.24 | 1.9  |                              |
| vanTG       | 37A |       |       |      | NoAmplification              |
| vanWB       | 37A |       |       |      | NoAmplification              |
| vanWG       | 37A |       |       |      | LowEfficiency, CtIsSmall, Ci |
| vanXA       | 37A |       |       |      | CurveFitFailed               |
| vanXB       | 37A |       |       |      | NoAmplification              |
| vanXD       | 37A | 31.45 | 74.94 | 2.06 |                              |

|              |     |       |       |      |                             |
|--------------|-----|-------|-------|------|-----------------------------|
| vanYB        | 37A | 33.11 | 84.64 | 1.91 |                             |
| vanYD-01     | 37A | 31.19 | 82.22 | 1.83 |                             |
| vanYD-02     | 37A | 37.84 | 79.64 | 1.89 | MultipleMeltPeaks           |
| vatB-01      | 37A | 38.18 | 81.47 | 1.81 |                             |
| vatB-02      | 37A | 38.57 | 81.59 | 1.83 |                             |
| vatC-01      | 37A |       |       |      | BadR2, LowEfficiency, CtIsS |
| vatC-02      | 37A | 33.44 | 87.58 | 1.86 |                             |
| vatE-01      | 37A | 29.25 | 77.28 | 2.19 |                             |
| vatE-02      | 37A | 39.67 | 75.1  | 2.01 |                             |
| vgaA-01      | 37A |       |       |      | CurveFitFailed              |
| vgaA-02      | 37A |       |       |      | LowEfficiency, CtIsSmall, S |
| vgb-01       | 37A | 35.65 | 81.23 | 1.84 |                             |
| vgbB-01      | 37A |       |       |      | CurveFitFailed              |
| vgbB-02      | 37A |       |       |      | NoAmplification             |
| yceE/mdtG-0  | 37A |       |       |      | LowEfficiency, CtIsSmall, C |
| yceE/mdtG-0  | 37A | 39.66 | 81.22 | 1.76 |                             |
| yceL/mdtH-0  | 37A | 29.49 | 82.19 | 1.93 | MultipleMeltPeaks           |
| yceL/mdtH-0  | 37A |       |       |      | LowEfficiency, CtIsSmall, C |
| yceL/mdtH-0  | 37A | 33.73 | 86.25 | 1.95 |                             |
| yidY/mdtL-01 | 37A | 30.16 | 88.76 | 1.95 | MultipleMeltPeaks           |
| yidY/mdtL-02 | 37A |       |       |      | BadR2, LowEfficiency, CtIsS |































| Assay          | Sample | Ct | Tm    | Efficiency | flag                         |
|----------------|--------|----|-------|------------|------------------------------|
| 16S rRNA       | 37B    |    | 18.24 | 82.29      | 1.99                         |
| aac            | 37B    |    | 31.17 | 85.6       | 1.88 MultipleMeltPeaks       |
| aac(6')-Ib(akz | 37B    |    |       |            | CurveFitFailed               |
| aac(6')-Ib(akz | 37B    |    | 29.79 | 86.08      | 1.98                         |
| aac(6')-Ib(akz | 37B    |    | 34.75 | 89.96      | 1.86 MultipleMeltPeaks       |
| aac(6')-II     | 37B    |    | 30.23 | 88.43      | 1.94                         |
| aac(6')I1      | 37B    |    | 33.23 | 91.61      | 1.92                         |
| aacA/aphD      | 37B    |    |       |            | LowEfficiency, CtIsSmall, S: |
| aacC           | 37B    |    | 28.1  | 87.42      | 1.88 MultipleMeltPeaks       |
| aacC1          | 37B    |    | 40.12 | 86.21      | 1.7 MultipleMeltPeaks        |
| aacC2          | 37B    |    |       |            | NoAmplification              |
| aacC4          | 37B    |    | 32.25 | 91.82      | 2.01                         |
| aadA-01        | 37B    |    |       |            | CurveFitFailed               |
| aadA-02        | 37B    |    | 33.01 | 80.4       | 1.99                         |
| aadA-1-01      | 37B    |    | 33.78 | 83.55      | 1.99                         |
| aadA-1-02      | 37B    |    |       |            | CurveFitFailed               |
| aadA1          | 37B    |    | 32.36 | 83.47      | 2.02                         |
| aadA2-01       | 37B    |    |       |            | CurveFitFailed               |
| aadA2-02       | 37B    |    | 31.59 | 75.44      | 2.02                         |
| aadA2-03       | 37B    |    |       |            | CurveFitFailed               |
| aadA5-01       | 37B    |    | 31.68 | 78.52      | 1.97                         |
| aadA5-02       | 37B    |    | 32.2  | 83.34      | 1.99 MultipleMeltPeaks       |
| aadA9-01       | 37B    |    |       |            | CurveFitFailed               |
| aadA9-02       | 37B    |    |       |            | CurveFitFailed               |
| aadD           | 37B    |    |       |            | CurveFitFailed               |
| aadE           | 37B    |    |       |            | CurveFitFailed               |
| acrA-01        | 37B    |    | 31.4  | 88.74      | 1.95                         |
| acrA-02        | 37B    |    | 37.18 | 89.68      | 1.72 MultipleMeltPeaks       |
| acrA-03        | 37B    |    |       |            | CurveFitFailed               |
| acrA-04        | 37B    |    | 30.98 | 85.64      | 2                            |
| acrA-05        | 37B    |    | 30.01 | 89.46      | 1.99                         |
| acrB-01        | 37B    |    |       |            | LowEfficiency, CtIsSmall, S: |
| acrF           | 37B    |    | 31.74 | 83.02      | 1.96                         |
| acrR-01        | 37B    |    | 34.68 | 81.3       | 1.9                          |
| acrR-02        | 37B    |    | 35.13 | 90.29      | 1.79                         |
| Actin          | 37B    |    | 21.33 | 87.18      | 1.97                         |
| adeA           | 37B    |    |       |            | LowEfficiency, CtIsSmall, S: |
| ampC-01        | 37B    |    | 34.67 | 80.28      | 1.88                         |
| ampC-02        | 37B    |    |       |            | CurveFitFailed               |
| ampC-04        | 37B    |    | 31.82 | 79.78      | 1.85                         |
| ampC-05        | 37B    |    |       |            | CurveFitFailed               |
| ampC-06        | 37B    |    | 36.34 | 71.83      | 1.9                          |
| ampC-07        | 37B    |    | 34.49 | 82.49      | 1.82 MultipleMeltPeaks       |
| ampC-09        | 37B    |    |       |            | CurveFitFailed               |
| ampC/blaDH     | 37B    |    | 29.09 | 84.69      | 1.98 MultipleMeltPeaks       |

|                          |     |       |       |      |                                          |
|--------------------------|-----|-------|-------|------|------------------------------------------|
| aph                      | 37B |       |       |      | CurveFitFailed                           |
| aph(2')-Id-01            | 37B |       |       |      | LowEfficiency, CtIsSmall, S <sub>e</sub> |
| aph(2')-Id-02            | 37B |       |       |      | LowEfficiency, CtIsSmall, S <sub>e</sub> |
| aph6ia                   | 37B | 33.93 | 77.94 | 1.92 |                                          |
| aphA1(aka k <sub>a</sub> | 37B |       |       |      | CurveFitFailed                           |
| bacA-01                  | 37B |       |       |      | CurveFitFailed                           |
| bacA-02                  | 37B | 32.04 | 84.06 | 1.9  | MultipleMeltPeaks                        |
| BETA-globin              | 37B | 22.65 | 84.05 | 2.01 |                                          |
| bla-ACC-1                | 37B | 31.31 | 86.69 | 1.94 |                                          |
| bla-L1                   | 37B | 30.52 | 85.3  | 2.03 | MultipleMeltPeaks                        |
| bla1                     | 37B |       |       |      | CurveFitFailed                           |
| blaCMY                   | 37B | 35.19 | 80.71 | 1.89 |                                          |
| blaCMY2-01               | 37B | 36.6  | 85.91 | 1.83 | MultipleMeltPeaks                        |
| blaCMY2-02               | 37B | 28.35 | 84.76 | 2.02 | MultipleMeltPeaks                        |
| blaCTX-M-01              | 37B | 35.96 | 90.94 | 1.74 | MultipleMeltPeaks                        |
| blaCTX-M-02              | 37B | 32.24 | 79.88 | 1.84 |                                          |
| blaCTX-M-03              | 37B |       |       |      | CurveFitFailed                           |
| blaCTX-M-04              | 37B | 33.05 | 90.24 | 1.78 | MultipleMeltPeaks                        |
| blaCTX-M-05              | 37B | 32.61 | 76.6  | 1.87 |                                          |
| blaCTX-M-06              | 37B |       |       |      | LowEfficiency, CtIsSmall, C <sub>i</sub> |
| blaGES                   | 37B |       |       |      | LowEfficiency, CtIsSmall, S <sub>e</sub> |
| blaIMP-01                | 37B |       |       |      | NoAmplification                          |
| blaIMP-02                | 37B | 36.54 | 85.35 | 1.84 |                                          |
| blaMOX/blaC              | 37B |       |       |      | CurveFitFailed                           |
| blaOCH                   | 37B |       |       |      | NoAmplification                          |
| blaOKP                   | 37B |       |       |      | NoAmplification                          |
| blaOXA1/blaC             | 37B |       |       |      | LowEfficiency, CtIsSmall, S <sub>e</sub> |
| blaOXA10-01              | 37B |       |       |      | LowEfficiency, CtIsSmall, S <sub>e</sub> |
| blaOXA10-02              | 37B |       |       |      | LowEfficiency, CtIsSmall, S <sub>e</sub> |
| blaOXY                   | 37B | 36.45 | 88.61 | 1.63 |                                          |
| blaPAO                   | 37B |       |       |      | BadR2, LowEfficiency, CtIsS              |
| blaPER                   | 37B | 37.86 | 78.44 | 1.79 |                                          |
| blaPSE                   | 37B |       |       |      | LowEfficiency, CtIsSmall, S <sub>e</sub> |
| blaROB                   | 37B |       |       |      | NoAmplification                          |
| blaSFO                   | 37B | 31.3  | 83.49 | 1.97 | MultipleMeltPeaks                        |
| blaSHV-01                | 37B | 36.39 | 73.33 | 1.94 |                                          |
| blaSHV-02                | 37B |       |       |      | LowEfficiency, CtIsSmall, S <sub>e</sub> |
| blaTEM                   | 37B | 27.59 | 79.16 | 1.99 |                                          |
| blaTLA                   | 37B |       |       |      | LowEfficiency, CtIsSmall, S <sub>e</sub> |
| blaVEB                   | 37B |       |       |      | LowEfficiency, CtIsSmall, C <sub>i</sub> |
| blaVIM                   | 37B | 37.42 | 91.33 | 1.82 |                                          |
| blaZ                     | 37B |       |       |      | LowEfficiency, CtIsSmall, S <sub>e</sub> |
| carB                     | 37B | 35.34 | 82.3  | 1.9  |                                          |
| catA1                    | 37B |       |       |      | NoAmplification                          |
| catB3                    | 37B | 34.34 | 80.13 | 1.95 |                                          |
| catB8                    | 37B | 29.34 | 82.77 | 2    |                                          |

|            |     |       |       |      |                              |
|------------|-----|-------|-------|------|------------------------------|
| ceoA       | 37B | 27.3  | 82.48 | 1.93 |                              |
| cepA       | 37B |       |       |      | CurveFitFailed               |
| cfiA       | 37B | 30.32 | 86.21 | 1.94 |                              |
| cfr        | 37B |       |       |      | LowEfficiency, CtIsSmall, S: |
| cfxA       | 37B | 23.18 | 77.56 | 2.08 |                              |
| cmeA       | 37B |       |       |      | LowEfficiency, CtIsSmall, S: |
| cmlA1-01   | 37B |       |       |      | CurveFitFailed               |
| cmlA1-02   | 37B | 35.83 | 82.06 | 1.84 |                              |
| cmr        | 37B |       |       |      | LowEfficiency, CtIsSmall, S: |
| cmx(A)     | 37B | 27.91 | 88.17 | 2.01 | MultipleMeltPeaks            |
| cphA-01    | 37B | 30.82 | 85.53 | 1.94 |                              |
| cphA-02    | 37B | 35.95 | 82.45 | 1.83 |                              |
| dfrA1      | 37B | 34.33 | 78.51 | 1.99 |                              |
| dfrA12     | 37B |       |       |      | CurveFitFailed               |
| emrD       | 37B | 31.5  | 90.46 | 1.88 |                              |
| ereA       | 37B | 36.18 | 84.58 | 1.84 | MultipleMeltPeaks            |
| ereB       | 37B | 34.18 | 87.66 | 1.88 |                              |
| erm(34)    | 37B | 39.14 | 83.9  | 1.81 |                              |
| erm(35)    | 37B |       |       |      | CurveFitFailed               |
| erm(36)    | 37B | 33.37 | 81.3  | 2.15 |                              |
| ermA       | 37B |       |       |      | CurveFitFailed               |
| ermA/ermTR | 37B |       |       |      | NoAmplification              |
| ermB       | 37B | 25.32 | 75.14 | 2.09 |                              |
| ermC       | 37B |       |       |      | LowEfficiency, CtIsSmall, C: |
| ermF       | 37B |       |       |      | LowEfficiency, CtIsSmall, S: |
| ermJ/ermD  | 37B |       |       |      | CurveFitFailed               |
| ermK-01    | 37B | 35.23 | 81.17 | 1.98 |                              |
| ermK-02    | 37B | 32.99 | 87.04 | 1.88 | MultipleMeltPeaks            |
| ermT-01    | 37B |       |       |      | LowEfficiency, CtIsSmall, S: |
| ermT-02    | 37B | 33.51 | 70.92 | 2.03 | MultipleMeltPeaks            |
| ermX       | 37B | 25.96 | 83.74 | 1.9  |                              |
| ermY       | 37B |       |       |      | LowEfficiency, CtIsSmall, S: |
| fabK       | 37B | 25.49 | 79.14 | 2.13 |                              |
| floR       | 37B | 35.98 | 89.98 | 1.76 |                              |
| folA       | 37B |       |       |      | NoAmplification              |
| fosB       | 37B |       |       |      | LowEfficiency, CtIsSmall, S: |
| fosX       | 37B |       |       |      | LowEfficiency, CtIsSmall, S: |
| fox5       | 37B | 27.35 | 86.22 | 2.01 | MultipleMeltPeaks            |
| imiR       | 37B |       |       |      | CurveFitFailed               |
| ImrA-01    | 37B |       |       |      | LowEfficiency, CtIsSmall, S: |
| intl       | 37B | 28.96 | 84.86 | 1.98 | MultipleMeltPeaks            |
| intl1      | 37B | 20.48 | 87.17 | 2.05 |                              |
| IS613      | 37B | 25.58 | 79.85 | 2.1  |                              |
| lnuA-01    | 37B |       |       |      | LowEfficiency, CtIsSmall, S: |
| lnuB-01    | 37B |       |       |      | LowEfficiency, CtIsSmall, S: |
| lnuB-02    | 37B |       |       |      | LowEfficiency, CtIsSmall, S: |

|                |     |       |       |                              |
|----------------|-----|-------|-------|------------------------------|
| lnuC           | 37B |       |       | CurveFitFailed               |
| marR-01        | 37B | 33.85 | 85.21 | 1.94 MultipleMeltPeaks       |
| matA/mel       | 37B | 21.6  | 77.74 | 2.06                         |
| mdet1          | 37B |       |       | CurveFitFailed               |
| mdtA           | 37B | 38.35 | 81.83 | 1.79 MultipleMeltPeaks       |
| mdtE/yhiU      | 37B |       |       | LowEfficiency, CtIsSmall, S: |
| mecA           | 37B |       |       | LowEfficiency, CtIsSmall, S: |
| mefA           | 37B | 20.87 | 80.63 | 2 MultipleMeltPeaks          |
| mepA           | 37B | 30.39 | 87.53 | 2.08                         |
| mexA           | 37B | 33.65 | 86.21 | 1.9 MultipleMeltPeaks        |
| mexD           | 37B | 29.93 | 80.53 | 2.02                         |
| mexE           | 37B |       |       | CurveFitFailed               |
| mexF           | 37B | 28.58 | 88.33 | 2.06 MultipleMeltPeaks       |
| mphA-01        | 37B | 30.25 | 85.97 | 1.9 MultipleMeltPeaks        |
| mphA-02        | 37B | 31.45 | 84.08 | 2.01 MultipleMeltPeaks       |
| mphB           | 37B | 36.68 | 75.92 | 1.91                         |
| mphC           | 37B | 39.89 | 77.53 | 1.68 MultipleMeltPeaks       |
| msrA-01        | 37B |       |       | CurveFitFailed               |
| msrC-01        | 37B |       |       | NoAmplification              |
| mtrC-01        | 37B |       |       | CurveFitFailed               |
| mtrC-02        | 37B | 37.4  | 84.24 | 1.77 MultipleMeltPeaks       |
| mtrD-02        | 37B | 26.88 | 85.23 | 1.98 MultipleMeltPeaks       |
| mtrD-03        | 37B | 30.83 | 82.11 | 1.9                          |
| NDM1           | 37B |       |       | CurveFitFailed               |
| nimE           | 37B |       |       | CurveFitFailed               |
| nisB           | 37B |       |       | CurveFitFailed               |
| oleC           | 37B | 32.21 | 84.08 | 1.91 MultipleMeltPeaks       |
| oprD           | 37B | 27.42 | 81.74 | 1.99 MultipleMeltPeaks       |
| oprJ           | 37B | 28.82 | 87.73 | 1.98                         |
| pbp            | 37B |       |       | LowEfficiency, CtIsSmall, S: |
| pbp2x          | 37B | 24.09 | 75.75 | 2.11                         |
| Pbp5           | 37B |       |       | LowEfficiency, CtIsSmall, S: |
| penA           | 37B | 32.6  | 90.81 | 1.86                         |
| pikR1          | 37B | 38.3  | 89.66 | 1.74 MultipleMeltPeaks       |
| pikR2          | 37B | 32.18 | 84.68 | 2.1                          |
| pmrA           | 37B | 23.37 | 78.81 | 2.16                         |
| pncA           | 37B | 31.11 | 91.38 | 1.9                          |
| putative multi | 37B | 32.96 | 84.08 | 1.99                         |
| qac            | 37B |       |       | CurveFitFailed               |
| qacA           | 37B |       |       | LowEfficiency, CtIsSmall, C: |
| qacA/qacB      | 37B |       |       | CurveFitFailed               |
| qacEdelta1-0   | 37B |       |       | LowEfficiency, CtIsSmall, S: |
| qacEdelta1-0   | 37B | 30.79 | 90.26 | 1.88                         |
| qacH-01        | 37B | 35.93 | 83.54 | 1.88 MultipleMeltPeaks       |
| qacH-02        | 37B | 37.51 | 84.01 | 1.63                         |
| qnrA           | 37B | 35.98 | 79.9  | 1.84 MultipleMeltPeaks       |



|              |     |       |       |      |                              |
|--------------|-----|-------|-------|------|------------------------------|
| rarD-02      | 37B |       |       |      | NoAmplification              |
| sat4         | 37B |       |       |      | LowEfficiency, CtIsSmall, S: |
| sdeB         | 37B | 37.88 | 77.08 | 1.81 |                              |
| spcN-01      | 37B |       |       |      | LowEfficiency, CtIsSmall, S: |
| speA         | 37B |       |       |      | NoAmplification              |
| str          | 37B |       |       |      | LowEfficiency, CtIsSmall, S: |
| strA         | 37B |       |       |      | CurveFitFailed               |
| strB         | 37B | 28.33 | 83.84 | 1.95 |                              |
| sul1         | 37B | 32.75 | 89.81 | 1.82 |                              |
| sul2         | 37B |       |       |      | LowEfficiency, CtIsSmall, S: |
| sulA/foIP-01 | 37B | 22.34 | 80.93 | 2.06 |                              |
| sulA/foIP-03 | 37B | 22.93 | 82.76 | 2.03 |                              |
| tet(32)      | 37B | 25.28 | 81.41 | 1.97 |                              |
| tet(34)      | 37B | 30.88 | 75.85 | 2.01 |                              |
| tet(35)      | 37B |       |       |      | NoAmplification              |
| tet(36)-A    | 37B |       |       |      | LowEfficiency, CtIsSmall, S: |
| tet(36)-B    | 37B |       |       |      | LowEfficiency, CtIsSmall, S: |
| tet(37)      | 37B | 25.94 | 83.88 | 2    | MultipleMeltPeaks            |
| tetA-01      | 37B | 29.48 | 85.21 | 1.99 |                              |
| tetA-02      | 37B | 34.42 | 87.84 | 1.88 |                              |
| tetB-01      | 37B | 27.38 | 79.73 | 1.94 |                              |
| tetB-02      | 37B | 29.19 | 79.54 | 1.99 |                              |
| tetC-01      | 37B | 28.32 | 75.22 | 1.99 |                              |
| tetC-02      | 37B | 27.57 | 76.05 | 2.07 |                              |
| tetD-01      | 37B |       |       |      | LowEfficiency, CtIsSmall, S: |
| tetD-02      | 37B | 39.57 | 76.02 | 1.77 |                              |
| tetE         | 37B | 35.88 | 86.28 | 1.88 |                              |
| tetG-01      | 37B | 33.77 | 82.12 | 1.95 | MultipleMeltPeaks            |
| tetG-02      | 37B | 33.21 | 84.08 | 1.93 |                              |
| tetH         | 37B |       |       |      | LowEfficiency, CtIsSmall, C: |
| tetJ         | 37B |       |       |      | LowEfficiency, CtIsSmall, C: |
| tetK         | 37B |       |       |      | CurveFitFailed               |
| tetL-01      | 37B | 44.32 | 81.41 | 1.58 | MultipleMeltPeaks            |
| tetL-02      | 37B | 32.9  | 85.3  | 1.79 |                              |
| tetM-01      | 37B | 22.52 | 76.1  | 2.04 |                              |
| tetM-02      | 37B | 22.43 | 77.51 | 2.08 |                              |
| tetO-01      | 37B | 24.7  | 76.86 | 2.06 |                              |
| tetPA        | 37B |       |       |      | CurveFitFailed               |
| tetPB-01     | 37B | 37.66 | 83.22 | 1.74 | MultipleMeltPeaks            |
| tetPB-02     | 37B | 29.24 | 84.89 | 2.08 |                              |
| tetPB-03     | 37B |       |       |      | CurveFitFailed               |
| tetPB-05     | 37B |       |       |      | LowEfficiency, CtIsSmall, S: |
| tetQ         | 37B | 24.74 | 76.88 | 2.06 |                              |
| tetR-02      | 37B | 32.87 | 85.87 | 1.83 | MultipleMeltPeaks            |
| tetR-03      | 37B | 25.8  | 76.2  | 2.01 |                              |
| tetS         | 37B |       |       |      | LowEfficiency, CtIsSmall, S: |

|             |     |       |       |      |                                          |
|-------------|-----|-------|-------|------|------------------------------------------|
| tetT        | 37B |       |       |      | LowEfficiency, CtIsSmall, S <sub>e</sub> |
| tetU-01     | 37B |       |       |      | CurveFitFailed                           |
| tetV        | 37B | 36.75 | 89.15 | 1.78 |                                          |
| tetW-01     | 37B | 22.18 | 81.98 | 2.03 |                                          |
| tetX        | 37B |       |       |      | CtIsSmall, SaturationBaseli              |
| tnpA-01     | 37B |       |       |      | LowEfficiency, CtIsSmall, S <sub>e</sub> |
| tnpA-02     | 37B | 37.27 | 78.24 | 1.71 | MultipleMeltPeaks                        |
| tnpA-03     | 37B | 33.23 | 75.26 | 2.18 |                                          |
| tnpA-04     | 37B |       |       |      | LowEfficiency, CtIsSmall, S <sub>e</sub> |
| tnpA-05     | 37B | 29.66 | 82.6  | 1.97 |                                          |
| tnpA-07     | 37B |       |       |      | LowEfficiency, CtIsSmall, C <sub>i</sub> |
| tolC-01     | 37B | 36.29 | 81.47 | 1.84 |                                          |
| tolC-02     | 37B | 30.56 | 84.12 | 1.94 | MultipleMeltPeaks                        |
| tolC-03     | 37B | 29.98 | 87.38 | 1.95 | MultipleMeltPeaks                        |
| Tp614       | 37B | 35.86 | 79.38 | 1.9  |                                          |
| ttgA        | 37B | 34.37 | 87.51 | 1.88 |                                          |
| ttgB        | 37B | 37.2  | 84.67 | 1.86 | MultipleMeltPeaks                        |
| vanA        | 37B |       |       |      | LowEfficiency, CtIsSmall, S <sub>e</sub> |
| vanB-01     | 37B | 33.5  | 85.76 | 1.66 | MultipleMeltPeaks                        |
| vanC-01     | 37B |       |       |      | CurveFitFailed                           |
| vanC-02     | 37B |       |       |      | CurveFitFailed                           |
| vanC-03     | 37B | 27.67 | 85.71 | 1.96 |                                          |
| vanC1       | 37B |       |       |      | CurveFitFailed                           |
| vanC2/vanC3 | 37B | 31.53 | 89.52 | 1.87 | MultipleMeltPeaks                        |
| vanG        | 37B |       |       |      | LowEfficiency, CtIsSmall, C <sub>i</sub> |
| vanHB       | 37B | 34.31 | 82.76 | 1.88 | MultipleMeltPeaks                        |
| vanHD       | 37B | 33.17 | 75.41 | 1.94 | MultipleMeltPeaks                        |
| vanRA-01    | 37B |       |       |      | LowEfficiency, CtIsSmall, S <sub>e</sub> |
| vanRA-02    | 37B |       |       |      | CurveFitFailed                           |
| vanRB       | 37B | 32.59 | 85.64 | 1.95 |                                          |
| vanRC       | 37B |       |       |      | LowEfficiency, CtIsSmall, S <sub>e</sub> |
| vanRC4      | 37B |       |       |      | CurveFitFailed                           |
| vanRD       | 37B |       |       |      | CurveFitFailed                           |
| vanSA       | 37B |       |       |      | LowEfficiency, CtIsSmall, S <sub>e</sub> |
| vanSB       | 37B | 29.33 | 74.5  | 2    |                                          |
| vanSC-01    | 37B | 32.53 | 84.26 | 2.02 |                                          |
| vanSC-02    | 37B |       |       |      | NoAmplification                          |
| vanTC-01    | 37B |       |       |      | LowEfficiency, CtIsSmall, S <sub>e</sub> |
| vanTC-02    | 37B |       |       |      | LowEfficiency, CtIsSmall, S <sub>e</sub> |
| vanTE       | 37B |       |       |      | CurveFitFailed                           |
| vanTG       | 37B |       |       |      | BadR2, CtIsSmall, Saturatio              |
| vanWB       | 37B |       |       |      | CurveFitFailed                           |
| vanWG       | 37B | 36.91 | 74.05 | 1.9  |                                          |
| vanXA       | 37B |       |       |      | LowEfficiency, CtIsSmall, S <sub>e</sub> |
| vanXB       | 37B |       |       |      | NoAmplification                          |
| vanXD       | 37B | 32.19 | 74.8  | 2.06 |                                          |

|              |     |       |       |      |                              |
|--------------|-----|-------|-------|------|------------------------------|
| vanYB        | 37B | 36.69 | 81.1  | 1.89 | MultipleMeltPeaks            |
| vanYD-01     | 37B | 31.07 | 82.6  | 1.77 | MultipleMeltPeaks            |
| vanYD-02     | 37B | 38.3  | 74.85 | 1.9  |                              |
| vatB-01      | 37B | 35.69 | 74.98 | 1.9  |                              |
| vatB-02      | 37B | 37.04 | 76.32 | 1.83 |                              |
| vatC-01      | 37B |       |       |      | CurveFitFailed               |
| vatC-02      | 37B | 37.85 | 83.22 | 1.83 | MultipleMeltPeaks            |
| vatE-01      | 37B | 29.89 | 76.78 | 2.13 |                              |
| vatE-02      | 37B |       |       |      | NoAmplification              |
| vgaA-01      | 37B |       |       |      | CurveFitFailed               |
| vgaA-02      | 37B |       |       |      | CurveFitFailed               |
| vgb-01       | 37B | 38.84 | 74.72 | 1.72 | MultipleMeltPeaks            |
| vgbB-01      | 37B |       |       |      | CurveFitFailed               |
| vgbB-02      | 37B |       |       |      | LowEfficiency, CtIsSmall, S: |
| yceE/mdtG-0  | 37B |       |       |      | LowEfficiency, CtIsSmall, S: |
| yceE/mdtG-0  | 37B | 32.95 | 80.92 | 2.03 |                              |
| yceL/mdtH-0  | 37B | 30.5  | 76.07 | 1.91 | MultipleMeltPeaks            |
| yceL/mdtH-0  | 37B |       |       |      | LowEfficiency, CtIsSmall, C: |
| yceL/mdtH-0  | 37B | 36.72 | 79.49 | 1.81 | MultipleMeltPeaks            |
| yidY/mdtL-01 | 37B | 31.15 | 82.72 | 1.94 |                              |
| yidY/mdtL-02 | 37B |       |       |      | LowEfficiency, CtIsSmall, S: |































| Assay          | Sample | Ct | Tm    | Efficiency | flag                         |
|----------------|--------|----|-------|------------|------------------------------|
| 16S rRNA       | 37C    |    | 16.3  | 82.35      | 1.99                         |
| aac            | 37C    |    | 29.29 | 85.67      | 1.97 MultipleMeltPeaks       |
| aac(6')-Ib(akz | 37C    |    |       |            | CurveFitFailed               |
| aac(6')-Ib(akz | 37C    |    | 29.62 | 86.09      | 1.98                         |
| aac(6')-Ib(akz | 37C    |    | 31.32 | 84.03      | 2.04 MultipleMeltPeaks       |
| aac(6')-II     | 37C    |    | 29.35 | 88.43      | 1.91                         |
| aac(6')I1      | 37C    |    | 32.35 | 89.75      | 1.96 MultipleMeltPeaks       |
| aacA/aphD      | 37C    |    |       |            | LowEfficiency, CtIsSmall, S: |
| aacC           | 37C    |    | 27.78 | 91.81      | 1.95 MultipleMeltPeaks       |
| aacC1          | 37C    |    | 36.7  | 92.41      | 1.77 MultipleMeltPeaks       |
| aacC2          | 37C    |    |       |            | LowEfficiency, CtIsSmall, C: |
| aacC4          | 37C    |    | 30.27 | 92.3       | 2.08                         |
| aadA-01        | 37C    |    |       |            | LowEfficiency, CtIsSmall, C: |
| aadA-02        | 37C    |    | 33.2  | 80.09      | 1.92 MultipleMeltPeaks       |
| aadA-1-01      | 37C    |    | 34.2  | 91.57      | 1.91                         |
| aadA-1-02      | 37C    |    |       |            | LowEfficiency, CtIsSmall, S: |
| aadA1          | 37C    |    | 31.87 | 83.79      | 2.07                         |
| aadA2-01       | 37C    |    | 39.04 | 88.4       | 1.63 MultipleMeltPeaks       |
| aadA2-02       | 37C    |    | 30.12 | 75.51      | 2.02                         |
| aadA2-03       | 37C    |    |       |            | CurveFitFailed               |
| aadA5-01       | 37C    |    | 31.78 | 78.5       | 1.97                         |
| aadA5-02       | 37C    |    | 29.35 | 84.98      | 2.04                         |
| aadA9-01       | 37C    |    |       |            | CurveFitFailed               |
| aadA9-02       | 37C    |    |       |            | CurveFitFailed               |
| aadD           | 37C    |    |       |            | LowEfficiency, CtIsSmall, S: |
| aadE           | 37C    |    |       |            | LowEfficiency, CtIsSmall, S: |
| acrA-01        | 37C    |    | 32.14 | 89.15      | 1.93                         |
| acrA-02        | 37C    |    | 32.66 | 88.3       | 1.92                         |
| acrA-03        | 37C    |    | 34.05 | 90.36      | 1.86                         |
| acrA-04        | 37C    |    | 30.53 | 83.5       | 1.94                         |
| acrA-05        | 37C    |    | 29.24 | 90.04      | 2.02                         |
| acrB-01        | 37C    |    | 35.97 | 76.53      | 1.97                         |
| acrF           | 37C    |    | 31.21 | 84.67      | 2.04 MultipleMeltPeaks       |
| acrR-01        | 37C    |    | 35.16 | 81.18      | 1.83 MultipleMeltPeaks       |
| acrR-02        | 37C    |    | 36.53 | 87.48      | 1.8                          |
| Actin          | 37C    |    | 20.85 | 87.17      | 1.98                         |
| adeA           | 37C    |    | 38.13 | 90.81      | 1.74 MultipleMeltPeaks       |
| ampC-01        | 37C    |    | 31.08 | 85.51      | 1.98 MultipleMeltPeaks       |
| ampC-02        | 37C    |    | 30.93 | 87.12      | 1.92                         |
| ampC-04        | 37C    |    | 30.33 | 84.09      | 1.84 MultipleMeltPeaks       |
| ampC-05        | 37C    |    |       |            | CurveFitFailed               |
| ampC-06        | 37C    |    | 32.79 | 90.82      | 1.93                         |
| ampC-07        | 37C    |    | 35.65 | 87.45      | 1.79 MultipleMeltPeaks       |
| ampC-09        | 37C    |    | 35.08 | 91.35      | 1.76 MultipleMeltPeaks       |
| ampC/blaDH     | 37C    |    | 29.1  | 76.56      | 1.96 MultipleMeltPeaks       |

|                            |     |       |       |      |                                          |
|----------------------------|-----|-------|-------|------|------------------------------------------|
| aph                        | 37C |       |       |      | CurveFitFailed                           |
| aph(2')-Id-01              | 37C |       |       |      | LowEfficiency, CtIsSmall, S <sub>e</sub> |
| aph(2')-Id-02              | 37C |       |       |      | LowEfficiency, CtIsSmall, S <sub>e</sub> |
| aph6ia                     | 37C | 28.57 | 78.79 | 1.95 |                                          |
| aphA1(aka k <sub>a</sub> ) | 37C | 28.21 | 76.38 | 2.08 |                                          |
| bacA-01                    | 37C |       |       |      | BadR2, LowEfficiency, CtIsS              |
| bacA-02                    | 37C | 34.71 | 83.51 | 1.77 | MultipleMeltPeaks                        |
| BETA-globin                | 37C | 22.45 | 84.07 | 2.01 |                                          |
| bla-ACC-1                  | 37C | 32.67 | 91.12 | 1.95 | MultipleMeltPeaks                        |
| bla-L1                     | 37C | 29.86 | 85.06 | 2.05 |                                          |
| bla1                       | 37C |       |       |      | LowEfficiency, CtIsSmall, C <sub>i</sub> |
| blaCMY                     | 37C | 33.57 | 76.27 | 1.92 |                                          |
| blaCMY2-01                 | 37C | 32.38 | 75.12 | 2.08 |                                          |
| blaCMY2-02                 | 37C | 28.65 | 85.36 | 2.02 |                                          |
| blaCTX-M-01                | 37C | 34.01 | 91.39 | 1.9  |                                          |
| blaCTX-M-02                | 37C | 32.47 | 79.84 | 1.93 |                                          |
| blaCTX-M-03                | 37C | 32.75 | 80.89 | 1.94 |                                          |
| blaCTX-M-04                | 37C | 30.55 | 87.72 | 2.08 |                                          |
| blaCTX-M-05                | 37C | 30.95 | 76.89 | 1.84 |                                          |
| blaCTX-M-06                | 37C |       |       |      | LowEfficiency, CtIsSmall, C <sub>i</sub> |
| blaGES                     | 37C |       |       |      | CurveFitFailed                           |
| blaIMP-01                  | 37C |       |       |      | LowEfficiency, CtIsSmall, S <sub>e</sub> |
| blaIMP-02                  | 37C |       |       |      | LowEfficiency, CtIsSmall, S <sub>e</sub> |
| blaMOX/blaC                | 37C | 36.87 | 88.27 | 1.73 |                                          |
| blaOCH                     | 37C | 28.78 | 83.73 | 2.13 | MultipleMeltPeaks                        |
| blaOKP                     | 37C |       |       |      | NoAmplification                          |
| blaOXA1/blaC               | 37C |       |       |      | CurveFitFailed                           |
| blaOXA10-01                | 37C |       |       |      | LowEfficiency, CtIsSmall, S <sub>e</sub> |
| blaOXA10-02                | 37C |       |       |      | CurveFitFailed                           |
| blaOXY                     | 37C | 32.42 | 89.75 | 1.86 |                                          |
| blaPAO                     | 37C |       |       |      | LowEfficiency, CtIsSmall, C <sub>i</sub> |
| blaPER                     | 37C | 34.03 | 83.7  | 1.82 |                                          |
| blaPSE                     | 37C |       |       |      | CurveFitFailed                           |
| blaROB                     | 37C | 36.41 | 87.58 | 1.78 |                                          |
| blaSFO                     | 37C | 30.87 | 87.3  | 1.98 | MultipleMeltPeaks                        |
| blaSHV-01                  | 37C |       |       |      | CurveFitFailed                           |
| blaSHV-02                  | 37C | 35.07 | 82.07 | 1.96 |                                          |
| blaTEM                     | 37C | 25.13 | 79.23 | 2.04 |                                          |
| blaTLA                     | 37C |       |       |      | LowEfficiency, CtIsSmall, S <sub>e</sub> |
| blaVEB                     | 37C |       |       |      | LowEfficiency, CtIsSmall, C <sub>i</sub> |
| blaVIM                     | 37C | 37.64 | 86.59 | 2    | MultipleMeltPeaks                        |
| blaZ                       | 37C |       |       |      | CurveFitFailed                           |
| carB                       | 37C |       |       |      | CurveFitFailed                           |
| catA1                      | 37C |       |       |      | NoAmplification                          |
| catB3                      | 37C | 34.45 | 87.23 | 1.88 | MultipleMeltPeaks                        |
| catB8                      | 37C | 27.98 | 82.44 | 1.98 |                                          |

|            |     |       |       |      |                             |
|------------|-----|-------|-------|------|-----------------------------|
| ceoA       | 37C | 28.12 | 87.67 | 1.93 | MultipleMeltPeaks           |
| cepA       | 37C |       |       |      | BadR2, LowEfficiency, CtIsS |
| cfiA       | 37C | 31.95 | 87.52 | 1.89 |                             |
| cfr        | 37C |       |       |      | LowEfficiency, CtIsSmall, S |
| cfxA       | 37C | 19.46 | 77.64 | 2.05 |                             |
| cmeA       | 37C |       |       |      | CurveFitFailed              |
| cmlA1-01   | 37C | 33.32 | 87.63 | 1.84 | MultipleMeltPeaks           |
| cmlA1-02   | 37C | 29.99 | 88.75 | 1.92 |                             |
| cmr        | 37C |       |       |      | CurveFitFailed              |
| cmx(A)     | 37C | 26.44 | 84.82 | 2.01 | MultipleMeltPeaks           |
| cphA-01    | 37C | 30.68 | 88.99 | 2.01 |                             |
| cphA-02    | 37C | 31.31 | 82.46 | 1.97 |                             |
| dfrA1      | 37C | 36.75 | 78.35 | 1.9  | MultipleMeltPeaks           |
| dfrA12     | 37C |       |       |      | CurveFitFailed              |
| emrD       | 37C | 27.47 | 90.48 | 1.84 |                             |
| ereA       | 37C |       |       |      | CurveFitFailed              |
| ereB       | 37C | 33.08 | 85.72 | 2.04 | MultipleMeltPeaks           |
| erm(34)    | 37C | 36.58 | 88.78 | 1.79 | MultipleMeltPeaks           |
| erm(35)    | 37C |       |       |      | LowEfficiency, CtIsSmall, C |
| erm(36)    | 37C | 31.97 | 89.05 | 2.29 | MultipleMeltPeaks           |
| ermA       | 37C |       |       |      | LowEfficiency, CtIsSmall, C |
| ermA/ermTR | 37C |       |       |      | NoAmplification             |
| ermB       | 37C | 23.48 | 75.09 | 2.16 |                             |
| ermC       | 37C |       |       |      | LowEfficiency, CtIsSmall, C |
| ermF       | 37C |       |       |      | LowEfficiency, CtIsSmall, S |
| ermJ/ermD  | 37C |       |       |      | LowEfficiency, CtIsSmall, S |
| ermK-01    | 37C |       |       |      | LowEfficiency, CtIsSmall, S |
| ermK-02    | 37C | 35.69 | 75.84 | 1.93 | MultipleMeltPeaks           |
| ermT-01    | 37C |       |       |      | CurveFitFailed              |
| ermT-02    | 37C | 35.17 | 80.27 | 1.89 |                             |
| ermX       | 37C | 22.18 | 83.89 | 1.9  |                             |
| ermY       | 37C |       |       |      | LowEfficiency, CtIsSmall, S |
| fabK       | 37C | 24.55 | 79.15 | 2.21 |                             |
| floR       | 37C | 32.48 | 90.36 | 1.82 |                             |
| folA       | 37C |       |       |      | NoAmplification             |
| fosB       | 37C |       |       |      | LowEfficiency, CtIsSmall, S |
| fosX       | 37C |       |       |      | CurveFitFailed              |
| fox5       | 37C | 26.36 | 86.48 | 2    | MultipleMeltPeaks           |
| imiR       | 37C |       |       |      | LowEfficiency, CtIsSmall, S |
| ImrA-01    | 37C | 35.53 | 83.45 | 1.98 |                             |
| intl       | 37C | 29.07 | 84.74 | 1.97 |                             |
| intl1      | 37C | 19.79 | 87.24 | 2.06 |                             |
| IS613      | 37C | 21.41 | 80.13 | 2.15 |                             |
| lnuA-01    | 37C |       |       |      | CurveFitFailed              |
| lnuB-01    | 37C |       |       |      | LowEfficiency, CtIsSmall, C |
| lnuB-02    | 37C |       |       |      | CurveFitFailed              |

|                |     |       |       |      |                             |
|----------------|-----|-------|-------|------|-----------------------------|
| lnuC           | 37C | 36.34 | 84.27 | 1.66 | MultipleMeltPeaks           |
| marR-01        | 37C | 31.63 | 85.16 | 1.93 |                             |
| matA/mel       | 37C | 19.04 | 77.77 | 2.08 |                             |
| mdet1          | 37C |       |       |      | LowEfficiency, CtIsSmall, C |
| mdtA           | 37C | 35.88 | 82.3  | 1.73 |                             |
| mdtE/yhiU      | 37C | 31.97 | 90.68 | 1.87 |                             |
| mecA           | 37C |       |       |      | LowEfficiency, CtIsSmall, S |
| mefA           | 37C | 18.41 | 80.72 | 1.98 |                             |
| mepA           | 37C | 29.46 | 89.63 | 2.09 |                             |
| mexA           | 37C |       |       |      | LowEfficiency, CtIsSmall, S |
| mexD           | 37C | 29.35 | 80.43 | 2.02 |                             |
| mexE           | 37C | 31.12 | 88.75 | 1.96 |                             |
| mexF           | 37C | 26.21 | 87.68 | 1.98 | MultipleMeltPeaks           |
| mphA-01        | 37C | 27.44 | 88.88 | 1.99 | MultipleMeltPeaks           |
| mphA-02        | 37C | 28.14 | 85.46 | 1.79 |                             |
| mphB           | 37C | 32.68 | 91.57 | 2    |                             |
| mphC           | 37C |       |       |      | CurveFitFailed              |
| msrA-01        | 37C |       |       |      | LowEfficiency, CtIsSmall, S |
| msrC-01        | 37C |       |       |      | NoAmplification             |
| mtrC-01        | 37C | 37.35 | 83.43 | 1.85 | MultipleMeltPeaks           |
| mtrC-02        | 37C | 31.68 | 87.61 | 2.03 |                             |
| mtrD-02        | 37C | 26.68 | 82.4  | 1.95 |                             |
| mtrD-03        | 37C | 28.44 | 82.09 | 1.93 |                             |
| NDM1           | 37C |       |       |      | CurveFitFailed              |
| nimE           | 37C |       |       |      | CurveFitFailed              |
| nisB           | 37C |       |       |      | LowEfficiency, CtIsSmall, C |
| oleC           | 37C | 30.74 | 80.72 | 1.94 | MultipleMeltPeaks           |
| oprD           | 37C | 27.66 | 86.89 | 1.99 | MultipleMeltPeaks           |
| oprJ           | 37C | 26.49 | 90.76 | 1.94 |                             |
| pbp            | 37C |       |       |      | CurveFitFailed              |
| pbp2x          | 37C | 22.43 | 75.89 | 2.11 |                             |
| Pbp5           | 37C |       |       |      | CurveFitFailed              |
| penA           | 37C | 31.48 | 87.64 | 1.89 |                             |
| pikR1          | 37C | 36.02 | 82.24 | 1.8  | MultipleMeltPeaks           |
| pikR2          | 37C | 30.38 | 88.45 | 2.11 |                             |
| pmrA           | 37C | 21.99 | 78.8  | 2.19 |                             |
| pncA           | 37C | 30.38 | 90.11 | 1.94 |                             |
| putative multi | 37C | 34.14 | 84.16 | 1.95 | MultipleMeltPeaks           |
| qac            | 37C |       |       |      | CurveFitFailed              |
| qacA           | 37C |       |       |      | BadR2, LowEfficiency, CtIs  |
| qacA/qacB      | 37C |       |       |      | LowEfficiency, CtIsSmall, S |
| qacEdelta1-0   | 37C |       |       |      | CurveFitFailed              |
| qacEdelta1-0   | 37C | 28.44 | 90.34 | 1.94 |                             |
| qacH-01        | 37C | 31.68 | 81.55 | 1.89 | MultipleMeltPeaks           |
| qacH-02        | 37C | 36.54 | 83.96 | 1.67 |                             |
| qnrA           | 37C |       |       |      | LowEfficiency, CtIsSmall, S |

|              |     |       |       |      |                                          |
|--------------|-----|-------|-------|------|------------------------------------------|
| rarD-02      | 37C | 35.01 | 85.94 | 1.91 |                                          |
| sat4         | 37C |       |       |      | CurveFitFailed                           |
| sdeB         | 37C |       |       |      | CurveFitFailed                           |
| spcN-01      | 37C |       |       |      | LowEfficiency, CtIsSmall, S <sub>c</sub> |
| speA         | 37C |       |       |      | LowEfficiency, CtIsSmall, C <sub>i</sub> |
| str          | 37C |       |       |      | CurveFitFailed                           |
| strA         | 37C |       |       |      | LowEfficiency, CtIsSmall, C <sub>i</sub> |
| strB         | 37C | 29.33 | 83.83 | 1.96 |                                          |
| sul1         | 37C | 33.98 | 89.88 | 1.82 |                                          |
| sul2         | 37C | 37.54 | 89.74 | 1.71 |                                          |
| sulA/foIP-01 | 37C | 20.96 | 81.13 | 2.06 |                                          |
| sulA/foIP-03 | 37C | 21.57 | 83.17 | 2.05 |                                          |
| tet(32)      | 37C | 24.14 | 81.43 | 1.99 |                                          |
| tet(34)      | 37C | 31.35 | 75.71 | 1.99 |                                          |
| tet(35)      | 37C | 36.28 | 77.27 | 1.89 |                                          |
| tet(36)-A    | 37C |       |       |      | LowEfficiency, CtIsSmall, C <sub>i</sub> |
| tet(36)-B    | 37C |       |       |      | LowEfficiency, CtIsSmall, S <sub>c</sub> |
| tet(37)      | 37C | 22.89 | 76.63 | 2.02 |                                          |
| tetA-01      | 37C | 30.02 | 85.22 | 2.03 |                                          |
| tetA-02      | 37C | 33.81 | 89.08 | 1.83 |                                          |
| tetB-01      | 37C | 27.72 | 79.31 | 1.94 | MultipleMeltPeaks                        |
| tetB-02      | 37C | 25.52 | 79.68 | 2    |                                          |
| tetC-01      | 37C | 28.12 | 75.27 | 2.01 |                                          |
| tetC-02      | 37C | 26    | 76.11 | 2.06 |                                          |
| tetD-01      | 37C |       |       |      | LowEfficiency, CtIsSmall, C <sub>i</sub> |
| tetD-02      | 37C |       |       |      | LowEfficiency, CtIsSmall, S <sub>c</sub> |
| tetE         | 37C |       |       |      | LowEfficiency, CtIsSmall, C <sub>i</sub> |
| tetG-01      | 37C | 34.75 | 89.87 | 1.9  |                                          |
| tetG-02      | 37C | 33.24 | 89.8  | 1.97 |                                          |
| tetH         | 37C |       |       |      | CurveFitFailed                           |
| tetJ         | 37C |       |       |      | CurveFitFailed                           |
| tetK         | 37C |       |       |      | LowEfficiency, CtIsSmall, S <sub>c</sub> |
| tetL-01      | 37C |       |       |      | LowEfficiency, CtIsSmall, C <sub>i</sub> |
| tetL-02      | 37C | 31.46 | 85.27 | 1.89 |                                          |
| tetM-01      | 37C | 20.49 | 76.27 | 2.03 |                                          |
| tetM-02      | 37C | 20.3  | 77.59 | 2.08 |                                          |
| tetO-01      | 37C | 22.57 | 76.92 | 2.1  |                                          |
| tetPA        | 37C |       |       |      | LowEfficiency, CtIsSmall, C <sub>i</sub> |
| tetPB-01     | 37C | 31.73 | 87.58 | 1.94 |                                          |
| tetPB-02     | 37C | 28.99 | 84.75 | 2.1  |                                          |
| tetPB-03     | 37C |       |       |      | LowEfficiency, CtIsSmall, S <sub>c</sub> |
| tetPB-05     | 37C |       |       |      | LowEfficiency, CtIsSmall, C <sub>i</sub> |
| tetQ         | 37C | 22.57 | 76.88 | 2.07 |                                          |
| tetR-02      | 37C | 29.92 | 89.33 | 1.92 |                                          |
| tetR-03      | 37C | 26.75 | 76.2  | 1.99 |                                          |
| tetS         | 37C | 35.76 | 75.22 | 2.09 | MultipleMeltPeaks                        |

|             |     |       |       |      |                              |
|-------------|-----|-------|-------|------|------------------------------|
| tetT        | 37C |       |       |      | CurveFitFailed               |
| tetU-01     | 37C |       |       |      | CurveFitFailed               |
| tetV        | 37C | 32.45 | 89.45 | 1.84 |                              |
| tetW-01     | 37C | 20.43 | 82.03 | 2.05 |                              |
| tetX        | 37C |       |       |      | BadR2, CtIsSmall, Saturatio  |
| tnpA-01     | 37C |       |       |      | CurveFitFailed               |
| tnpA-02     | 37C | 35.91 | 89.54 | 1.7  | MultipleMeltPeaks            |
| tnpA-03     | 37C | 30.47 | 77.68 | 2.08 |                              |
| tnpA-04     | 37C |       |       |      | CurveFitFailed               |
| tnpA-05     | 37C | 29.82 | 80.73 | 1.95 |                              |
| tnpA-07     | 37C |       |       |      | LowEfficiency, CtIsSmall, Ci |
| tolC-01     | 37C | 34.3  | 81.49 | 1.91 |                              |
| tolC-02     | 37C | 30.36 | 87.7  | 1.97 |                              |
| tolC-03     | 37C | 30.31 | 86.22 | 1.97 |                              |
| Tp614       | 37C | 34.39 | 86.98 | 1.9  | MultipleMeltPeaks            |
| ttgA        | 37C | 37.68 | 88.26 | 1.77 | MultipleMeltPeaks            |
| ttgB        | 37C | 33.66 | 80.63 | 1.94 |                              |
| vanA        | 37C |       |       |      | CurveFitFailed               |
| vanB-01     | 37C | 30.42 | 89.02 | 2.05 |                              |
| vanC-01     | 37C | 35.51 | 73.19 | 2.04 |                              |
| vanC-02     | 37C |       |       |      | CurveFitFailed               |
| vanC-03     | 37C | 26.3  | 85.89 | 1.99 |                              |
| vanC1       | 37C |       |       |      | LowEfficiency, CtIsSmall, Ci |
| vanC2/vanC3 | 37C |       |       |      | CurveFitFailed               |
| vanG        | 37C |       |       |      | LowEfficiency, CtIsSmall, Ci |
| vanHB       | 37C | 31.71 | 79.67 | 1.78 | MultipleMeltPeaks            |
| vanHD       | 37C | 35.42 | 82.56 | 1.86 | MultipleMeltPeaks            |
| vanRA-01    | 37C |       |       |      | LowEfficiency, CtIsSmall, S: |
| vanRA-02    | 37C |       |       |      | LowEfficiency, CtIsSmall, Ci |
| vanRB       | 37C | 32.94 | 81.7  | 1.8  | MultipleMeltPeaks            |
| vanRC       | 37C |       |       |      | LowEfficiency, CtIsSmall, S: |
| vanRC4      | 37C |       |       |      | LowEfficiency, CtIsSmall, S: |
| vanRD       | 37C |       |       |      | CurveFitFailed               |
| vanSA       | 37C |       |       |      | LowEfficiency, CtIsSmall, S: |
| vanSB       | 37C | 30.5  | 74.45 | 2.02 |                              |
| vanSC-01    | 37C |       |       |      | CurveFitFailed               |
| vanSC-02    | 37C |       |       |      | NoAmplification              |
| vanTC-01    | 37C |       |       |      | LowEfficiency, CtIsSmall, Ci |
| vanTC-02    | 37C |       |       |      | CurveFitFailed               |
| vanTE       | 37C |       |       |      | LowEfficiency, CtIsSmall, S: |
| vanTG       | 37C |       |       |      | CurveFitFailed               |
| vanWB       | 37C |       |       |      | LowEfficiency, CtIsSmall, Ci |
| vanWG       | 37C | 36.93 | 74.02 | 1.97 |                              |
| vanXA       | 37C |       |       |      | LowEfficiency, CtIsSmall, S: |
| vanXB       | 37C |       |       |      | CurveFitFailed               |
| vanXD       | 37C | 30.89 | 75.57 | 2.05 |                              |

|              |     |       |       |                              |
|--------------|-----|-------|-------|------------------------------|
| vanYB        | 37C | 36.55 | 73.51 | 1.91 MultipleMeltPeaks       |
| vanYD-01     | 37C | 31.99 | 83.04 | 1.72 MultipleMeltPeaks       |
| vanYD-02     | 37C |       |       | LowEfficiency, CtIsSmall, Ci |
| vatB-01      | 37C |       |       | LowEfficiency, CtIsSmall, S: |
| vatB-02      | 37C | 34.49 | 75.52 | 2.05 MultipleMeltPeaks       |
| vatC-01      | 37C |       |       | CurveFitFailed               |
| vatC-02      | 37C | 34.81 | 83.37 | 1.89 MultipleMeltPeaks       |
| vatE-01      | 37C | 30.78 | 76.25 | 2.16                         |
| vatE-02      | 37C |       |       | BadR2, LowEfficiency, CtIsS  |
| vgaA-01      | 37C |       |       | CurveFitFailed               |
| vgaA-02      | 37C |       |       | LowEfficiency, CtIsSmall, S: |
| vgb-01       | 37C |       |       | LowEfficiency, CtIsSmall, S: |
| vgbB-01      | 37C |       |       | LowEfficiency, CtIsSmall, S: |
| vgbB-02      | 37C |       |       | LowEfficiency, CtIsSmall, Ci |
| yceE/mdtG-0  | 37C |       |       | CurveFitFailed               |
| yceE/mdtG-0  | 37C | 32.33 | 81.64 | 1.96                         |
| yceL/mdtH-0  | 37C | 28.36 | 76.58 | 1.92                         |
| yceL/mdtH-0  | 37C |       |       | LowEfficiency, CtIsSmall, Ci |
| yceL/mdtH-0  | 37C | 34.75 | 91.35 | 1.87 MultipleMeltPeaks       |
| yidY/mdtL-01 | 37C | 30.83 | 89.75 | 2 MultipleMeltPeaks          |
| yidY/mdtL-02 | 37C |       |       | CurveFitFailed               |































| Assay          | Sample | Ct | Tm    | Efficiency | flag                   |
|----------------|--------|----|-------|------------|------------------------|
| 16S rRNA       | 38A    |    | 24.05 | 82.25      | 1.98                   |
| aac            | 38A    |    | 32.6  | 86.31      | 1.71 MultipleMeltPeaks |
| aac(6')-Ib(akz | 38A    |    |       |            | NoAmplification        |
| aac(6')-Ib(akz | 38A    |    | 37.24 | 79.77      | 1.8                    |
| aac(6')-Ib(akz | 38A    |    | 37.28 | 81.07      | 1.74 MultipleMeltPeaks |
| aac(6')-II     | 38A    |    | 38.42 | 81.08      | 1.52                   |
| aac(6')I1      | 38A    |    |       |            | NoAmplification        |
| aacA/aphD      | 38A    |    |       |            | NoAmplification        |
| aacC           | 38A    |    | 33.35 | 86.23      | 1.85 MultipleMeltPeaks |
| aacC1          | 38A    |    |       |            | NoAmplification        |
| aacC2          | 38A    |    |       |            | NoAmplification        |
| aacC4          | 38A    |    |       |            | NoAmplification        |
| aadA-01        | 38A    |    |       |            | NoAmplification        |
| aadA-02        | 38A    |    |       |            | CurveFitFailed         |
| aadA-1-01      | 38A    |    | 37.91 | 81.55      | 1.72 MultipleMeltPeaks |
| aadA-1-02      | 38A    |    |       |            | NoAmplification        |
| aadA1          | 38A    |    | 33.73 | 89.9       | 1.88                   |
| aadA2-01       | 38A    |    | 37.17 | 82.98      | 1.81                   |
| aadA2-02       | 38A    |    |       |            | NoAmplification        |
| aadA2-03       | 38A    |    |       |            | NoAmplification        |
| aadA5-01       | 38A    |    | 38.56 | 84.82      | 1.78 MultipleMeltPeaks |
| aadA5-02       | 38A    |    | 33.04 | 86.46      | 1.92                   |
| aadA9-01       | 38A    |    |       |            | CurveFitFailed         |
| aadA9-02       | 38A    |    | 38.47 | 73.87      | 1.77                   |
| aadD           | 38A    |    |       |            | NoAmplification        |
| aadE           | 38A    |    |       |            | NoAmplification        |
| acrA-01        | 38A    |    | 33.06 | 88.73      | 1.9                    |
| acrA-02        | 38A    |    |       |            | CurveFitFailed         |
| acrA-03        | 38A    |    |       |            | NoAmplification        |
| acrA-04        | 38A    |    | 31.56 | 80.64      | 1.99                   |
| acrA-05        | 38A    |    | 34.76 | 79.49      | 1.88                   |
| acrB-01        | 38A    |    |       |            | NoAmplification        |
| acrF           | 38A    |    | 30.04 | 82.74      | 1.78                   |
| acrR-01        | 38A    |    | 36.31 | 81.1       | 1.85                   |
| acrR-02        | 38A    |    |       |            | CurveFitFailed         |
| Actin          | 38A    |    | 22.72 | 87.19      | 1.96                   |
| adeA           | 38A    |    |       |            | NoAmplification        |
| ampC-01        | 38A    |    | 31.75 | 81.95      | 2 MultipleMeltPeaks    |
| ampC-02        | 38A    |    |       |            | NoAmplification        |
| ampC-04        | 38A    |    | 34.27 | 78.19      | 2                      |
| ampC-05        | 38A    |    |       |            | NoAmplification        |
| ampC-06        | 38A    |    |       |            | NoAmplification        |
| ampC-07        | 38A    |    | 34.11 | 88.69      | 1.81                   |
| ampC-09        | 38A    |    |       |            | NoAmplification        |
| ampC/blaDH     | 38A    |    | 30.84 | 76.71      | 1.95 MultipleMeltPeaks |

|                            |     |       |       |      |                   |
|----------------------------|-----|-------|-------|------|-------------------|
| aph                        | 38A |       |       |      | NoAmplification   |
| aph(2')-Id-01              | 38A |       |       |      | NoAmplification   |
| aph(2')-Id-02              | 38A |       |       |      | NoAmplification   |
| aph6ia                     | 38A |       |       |      | NoAmplification   |
| aphA1(aka k <sub>z</sub> ) | 38A |       |       |      | NoAmplification   |
| bacA-01                    | 38A |       |       |      | NoAmplification   |
| bacA-02                    | 38A |       |       |      | CurveFitFailed    |
| BETA-globin                | 38A | 24.59 | 83.98 | 1.97 | MultipleMeltPeaks |
| bla-ACC-1                  | 38A | 37.84 | 80.13 | 1.69 | MultipleMeltPeaks |
| bla-L1                     | 38A | 32.62 | 85.03 | 1.99 |                   |
| bla1                       | 38A |       |       |      | NoAmplification   |
| blaCMY                     | 38A |       |       |      | NoAmplification   |
| blaCMY2-01                 | 38A |       |       |      | NoAmplification   |
| blaCMY2-02                 | 38A | 28.74 | 87.2  | 1.92 |                   |
| blaCTX-M-01                | 38A | 35.81 | 86.46 | 1.99 |                   |
| blaCTX-M-02                | 38A | 32.67 | 81.29 | 1.96 |                   |
| blaCTX-M-03                | 38A |       |       |      | NoAmplification   |
| blaCTX-M-04                | 38A | 30.85 | 79.14 | 1.99 |                   |
| blaCTX-M-05                | 38A | 32.73 | 76.89 | 1.82 |                   |
| blaCTX-M-06                | 38A |       |       |      | NoAmplification   |
| blaGES                     | 38A |       |       |      | NoAmplification   |
| blaIMP-01                  | 38A |       |       |      | NoAmplification   |
| blaIMP-02                  | 38A |       |       |      | NoAmplification   |
| blaMOX/blaC                | 38A | 37.93 | 88.33 | 1.77 |                   |
| blaOCH                     | 38A |       |       |      | NoAmplification   |
| blaOKP                     | 38A |       |       |      | NoAmplification   |
| blaOXA1/blaC               | 38A |       |       |      | NoAmplification   |
| blaOXA10-01                | 38A |       |       |      | NoAmplification   |
| blaOXA10-02                | 38A |       |       |      | NoAmplification   |
| blaOXY                     | 38A |       |       |      | CurveFitFailed    |
| blaPAO                     | 38A |       |       |      | NoAmplification   |
| blaPER                     | 38A |       |       |      | CurveFitFailed    |
| blaPSE                     | 38A |       |       |      | NoAmplification   |
| blaROB                     | 38A |       |       |      | NoAmplification   |
| blaSFO                     | 38A | 35.31 | 81.02 | 1.87 | MultipleMeltPeaks |
| blaSHV-01                  | 38A | 42.65 | 73.17 | 1.73 |                   |
| blaSHV-02                  | 38A |       |       |      | CurveFitFailed    |
| blaTEM                     | 38A |       |       |      | NoAmplification   |
| blaTLA                     | 38A |       |       |      | NoAmplification   |
| blaVEB                     | 38A |       |       |      | NoAmplification   |
| blaVIM                     | 38A |       |       |      | NoAmplification   |
| blaZ                       | 38A |       |       |      | NoAmplification   |
| carB                       | 38A |       |       |      | NoAmplification   |
| catA1                      | 38A |       |       |      | NoAmplification   |
| catB3                      | 38A |       |       |      | NoAmplification   |
| catB8                      | 38A | 30.66 | 82.24 | 1.97 |                   |

|            |     |       |       |      |                              |
|------------|-----|-------|-------|------|------------------------------|
| ceoA       | 38A | 29.08 | 82.45 | 1.93 |                              |
| cepA       | 38A |       |       |      | NoAmplification              |
| cfiA       | 38A | 34.65 | 86.44 | 1.86 |                              |
| cfr        | 38A |       |       |      | NoAmplification              |
| cfxA       | 38A |       |       |      | NoAmplification              |
| cmeA       | 38A | 44.93 | 61.48 | 1.46 | MultipleMeltPeaks            |
| cmlA1-01   | 38A |       |       |      | NoAmplification              |
| cmlA1-02   | 38A |       |       |      | NoAmplification              |
| cmr        | 38A |       |       |      | NoAmplification              |
| cmx(A)     | 38A | 30.12 | 84.74 | 1.96 |                              |
| cphA-01    | 38A | 34.98 | 81.23 | 1.89 | MultipleMeltPeaks            |
| cphA-02    | 38A | 32.97 | 82.43 | 1.94 |                              |
| dfrA1      | 38A |       |       |      | NoAmplification              |
| dfrA12     | 38A |       |       |      | CurveFitFailed               |
| emrD       | 38A |       |       |      | NoAmplification              |
| ereA       | 38A |       |       |      | NoAmplification              |
| ereB       | 38A |       |       |      | CurveFitFailed               |
| erm(34)    | 38A |       |       |      | NoAmplification              |
| erm(35)    | 38A |       |       |      | NoAmplification              |
| erm(36)    | 38A | 38.3  | 87.6  | 1.7  | MultipleMeltPeaks            |
| ermA       | 38A |       |       |      | NoAmplification              |
| ermA/ermTR | 38A |       |       |      | NoAmplification              |
| ermB       | 38A |       |       |      | NoAmplification              |
| ermC       | 38A | 38.96 | 85.46 | 1.87 | MultipleMeltPeaks            |
| ermF       | 38A |       |       |      | NoAmplification              |
| ermJ/ermD  | 38A |       |       |      | NoAmplification              |
| ermK-01    | 38A |       |       |      | NoAmplification              |
| ermK-02    | 38A | 35.87 | 81.17 | 1.82 | MultipleMeltPeaks            |
| ermT-01    | 38A |       |       |      | NoAmplification              |
| ermT-02    | 38A | 34.62 | 74.46 | 1.97 |                              |
| ermX       | 38A | 38.31 | 84.49 | 1.79 |                              |
| ermY       | 38A |       |       |      | NoAmplification              |
| fabK       | 38A | 28.18 | 79.08 | 2.05 |                              |
| floR       | 38A |       |       |      | NoAmplification              |
| folA       | 38A |       |       |      | NoAmplification              |
| fosB       | 38A |       |       |      | LowEfficiency, CtIsSmall, S: |
| fosX       | 38A |       |       |      | NoAmplification              |
| fox5       | 38A | 28.97 | 86.41 | 1.97 |                              |
| imiR       | 38A |       |       |      | CurveFitFailed               |
| lmrA-01    | 38A |       |       |      | NoAmplification              |
| intl       | 38A | 31.04 | 84.85 | 1.96 |                              |
| intl1      | 38A | 22.19 | 87.25 | 2    |                              |
| IS613      | 38A |       |       |      | NoAmplification              |
| lnuA-01    | 38A |       |       |      | NoAmplification              |
| lnuB-01    | 38A |       |       |      | NoAmplification              |
| lnuB-02    | 38A |       |       |      | NoAmplification              |

|               |     |       |       |      |                   |
|---------------|-----|-------|-------|------|-------------------|
| lnuC          | 38A | 36.62 | 84.28 | 1.75 |                   |
| marR-01       | 38A | 34.93 | 85.19 | 1.87 |                   |
| matA/mel      | 38A | 29.64 | 77.41 | 2.06 |                   |
| mdet1         | 38A |       |       |      | NoAmplification   |
| mdtA          | 38A |       |       |      | NoAmplification   |
| mdtE/yhiU     | 38A |       |       |      | NoAmplification   |
| mecA          | 38A |       |       |      | NoAmplification   |
| mefA          | 38A | 28.57 | 80.7  | 1.97 |                   |
| mepA          | 38A |       |       |      | CurveFitFailed    |
| mexA          | 38A |       |       |      | NoAmplification   |
| mexD          | 38A | 33.52 | 80.14 | 2    |                   |
| mexE          | 38A | 30.15 | 82.44 | 1.95 |                   |
| mexF          | 38A | 29.55 | 81.31 | 2.08 |                   |
| mphA-01       | 38A | 32.2  | 89.4  | 1.99 | MultipleMeltPeaks |
| mphA-02       | 38A | 31.55 | 89.44 | 1.98 |                   |
| mphB          | 38A |       |       |      | NoAmplification   |
| mphC          | 38A |       |       |      | NoAmplification   |
| msrA-01       | 38A |       |       |      | CurveFitFailed    |
| msrC-01       | 38A |       |       |      | NoAmplification   |
| mtrC-01       | 38A |       |       |      | NoAmplification   |
| mtrC-02       | 38A | 40.41 | 84.41 | 1.69 |                   |
| mtrD-02       | 38A | 29.18 | 83.86 | 2.02 |                   |
| mtrD-03       | 38A |       |       |      | NoAmplification   |
| NDM1          | 38A | 38.83 | 64.23 | 1.77 | MultipleMeltPeaks |
| nimE          | 38A |       |       |      | NoAmplification   |
| nisB          | 38A |       |       |      | NoAmplification   |
| oleC          | 38A |       |       |      | CurveFitFailed    |
| oprD          | 38A | 29.7  | 81.76 | 1.96 | MultipleMeltPeaks |
| oprJ          | 38A |       |       |      | NoAmplification   |
| pbp           | 38A |       |       |      | NoAmplification   |
| pbp2x         | 38A | 29.95 | 75.73 | 2.06 |                   |
| Pbp5          | 38A |       |       |      | NoAmplification   |
| penA          | 38A |       |       |      | NoAmplification   |
| pikR1         | 38A |       |       |      | NoAmplification   |
| pikR2         | 38A | 33.07 | 84.75 | 1.99 |                   |
| pmrA          | 38A | 30.11 | 81.73 | 2.03 |                   |
| pncA          | 38A |       |       |      | CurveFitFailed    |
| putative mul1 | 38A | 31.43 | 84.19 | 1.99 |                   |
| qac           | 38A |       |       |      | NoAmplification   |
| qacA          | 38A | 36.9  | 70.48 | 1.8  |                   |
| qacA/qacB     | 38A |       |       |      | NoAmplification   |
| qacEdelta1-0  | 38A |       |       |      | NoAmplification   |
| qacEdelta1-0  | 38A | 40.27 | 63.53 | 1.59 | MultipleMeltPeaks |
| qacH-01       | 38A | 35.67 | 87.73 | 1.79 |                   |
| qacH-02       | 38A | 37.97 | 84.03 | 1.65 |                   |
| qnrA          | 38A | 38.19 | 86.36 | 1.86 | MultipleMeltPeaks |



|              |     |       |       |      |                   |
|--------------|-----|-------|-------|------|-------------------|
| rarD-02      | 38A |       |       |      | NoAmplification   |
| sat4         | 38A |       |       |      | NoAmplification   |
| sdeB         | 38A |       |       |      | NoAmplification   |
| spcN-01      | 38A |       |       |      | NoAmplification   |
| speA         | 38A |       |       |      | NoAmplification   |
| str          | 38A |       |       |      | NoAmplification   |
| strA         | 38A |       |       |      | NoAmplification   |
| strB         | 38A |       |       |      | NoAmplification   |
| sul1         | 38A | 37.75 | 87.17 | 1.65 | MultipleMeltPeaks |
| sul2         | 38A |       |       |      | NoAmplification   |
| sulA/foIP-01 | 38A | 28.92 | 81.45 | 1.95 |                   |
| sulA/foIP-03 | 38A | 27.84 | 81.81 | 1.98 |                   |
| tet(32)      | 38A |       |       |      | NoAmplification   |
| tet(34)      | 38A | 29.42 | 76.08 | 2.02 |                   |
| tet(35)      | 38A |       |       |      | NoAmplification   |
| tet(36)-A    | 38A |       |       |      | NoAmplification   |
| tet(36)-B    | 38A |       |       |      | NoAmplification   |
| tet(37)      | 38A | 37.67 | 75.6  | 1.84 | MultipleMeltPeaks |
| tetA-01      | 38A | 31.95 | 85.2  | 1.9  |                   |
| tetA-02      | 38A | 41.78 | 72.25 | 1.65 |                   |
| tetB-01      | 38A |       |       |      | CurveFitFailed    |
| tetB-02      | 38A | 40.64 | 75.62 | 1.78 |                   |
| tetC-01      | 38A |       |       |      | NoAmplification   |
| tetC-02      | 38A |       |       |      | NoAmplification   |
| tetD-01      | 38A |       |       |      | NoAmplification   |
| tetD-02      | 38A |       |       |      | NoAmplification   |
| tetE         | 38A |       |       |      | NoAmplification   |
| tetG-01      | 38A |       |       |      | NoAmplification   |
| tetG-02      | 38A | 40.91 | 62.3  | 1.73 | MultipleMeltPeaks |
| tetH         | 38A |       |       |      | NoAmplification   |
| tetJ         | 38A |       |       |      | NoAmplification   |
| tetK         | 38A |       |       |      | NoAmplification   |
| tetL-01      | 38A |       |       |      | NoAmplification   |
| tetL-02      | 38A | 36.8  | 85.01 | 1.69 |                   |
| tetM-01      | 38A |       |       |      | CurveFitFailed    |
| tetM-02      | 38A |       |       |      | NoAmplification   |
| tetO-01      | 38A |       |       |      | NoAmplification   |
| tetPA        | 38A |       |       |      | NoAmplification   |
| tetPB-01     | 38A | 40.61 | 62.04 | 1.72 | MultipleMeltPeaks |
| tetPB-02     | 38A | 32.4  | 84.73 | 2.03 |                   |
| tetPB-03     | 38A |       |       |      | NoAmplification   |
| tetPB-05     | 38A |       |       |      | NoAmplification   |
| tetQ         | 38A |       |       |      | NoAmplification   |
| tetR-02      | 38A | 34.08 | 89.04 | 1.8  |                   |
| tetR-03      | 38A |       |       |      | NoAmplification   |
| tetS         | 38A | 40.69 | 61.53 | 1.65 | MultipleMeltPeaks |

|             |     |       |       |      |                   |
|-------------|-----|-------|-------|------|-------------------|
| tetT        | 38A |       |       |      | NoAmplification   |
| tetU-01     | 38A |       |       |      | NoAmplification   |
| tetV        | 38A |       |       |      | NoAmplification   |
| tetW-01     | 38A |       |       |      | NoAmplification   |
| tetX        | 38A |       |       |      | NoAmplification   |
| tnpA-01     | 38A |       |       |      | NoAmplification   |
| tnpA-02     | 38A |       |       |      | NoAmplification   |
| tnpA-03     | 38A | 32.75 | 75.21 | 2.16 |                   |
| tnpA-04     | 38A |       |       |      | NoAmplification   |
| tnpA-05     | 38A | 29.15 | 80.82 | 1.94 |                   |
| tnpA-07     | 38A |       |       |      | NoAmplification   |
| tolC-01     | 38A | 38.43 | 80.2  | 1.74 | MultipleMeltPeaks |
| tolC-02     | 38A | 33.16 | 83.76 | 1.94 | MultipleMeltPeaks |
| tolC-03     | 38A | 32.44 | 81.48 | 1.92 | MultipleMeltPeaks |
| Tp614       | 38A |       |       |      | CurveFitFailed    |
| ttgA        | 38A |       |       |      | NoAmplification   |
| ttgB        | 38A |       |       |      | NoAmplification   |
| vanA        | 38A |       |       |      | NoAmplification   |
| vanB-01     | 38A | 35.94 | 83.1  | 1.84 |                   |
| vanC-01     | 38A |       |       |      | NoAmplification   |
| vanC-02     | 38A |       |       |      | NoAmplification   |
| vanC-03     | 38A | 28.63 | 86.26 | 1.95 |                   |
| vanC1       | 38A |       |       |      | NoAmplification   |
| vanC2/vanC3 | 38A | 35.57 | 81.42 | 1.88 |                   |
| vanG        | 38A |       |       |      | NoAmplification   |
| vanHB       | 38A |       |       |      | NoAmplification   |
| vanHD       | 38A | 38.18 | 82.68 | 1.78 |                   |
| vanRA-01    | 38A |       |       |      | NoAmplification   |
| vanRA-02    | 38A |       |       |      | NoAmplification   |
| vanRB       | 38A | 36.23 | 87.51 | 1.78 |                   |
| vanRC       | 38A |       |       |      | NoAmplification   |
| vanRC4      | 38A |       |       |      | NoAmplification   |
| vanRD       | 38A |       |       |      | NoAmplification   |
| vanSA       | 38A |       |       |      | NoAmplification   |
| vanSB       | 38A | 33.58 | 73.87 | 2.08 | MultipleMeltPeaks |
| vanSC-01    | 38A |       |       |      | CurveFitFailed    |
| vanSC-02    | 38A |       |       |      | NoAmplification   |
| vanTC-01    | 38A |       |       |      | NoAmplification   |
| vanTC-02    | 38A | 41.11 | 85.38 | 1.67 | MultipleMeltPeaks |
| vanTE       | 38A |       |       |      | NoAmplification   |
| vanTG       | 38A |       |       |      | NoAmplification   |
| vanWB       | 38A |       |       |      | NoAmplification   |
| vanWG       | 38A |       |       |      | NoAmplification   |
| vanXA       | 38A |       |       |      | CurveFitFailed    |
| vanXB       | 38A |       |       |      | NoAmplification   |
| vanXD       | 38A | 30.87 | 75.47 | 2.05 |                   |

|              |     |       |       |      |                   |
|--------------|-----|-------|-------|------|-------------------|
| vanYB        | 38A |       |       |      | NoAmplification   |
| vanYD-01     | 38A | 34.8  | 81.11 | 1.83 |                   |
| vanYD-02     | 38A | 39.59 | 74.87 | 1.87 |                   |
| vatB-01      | 38A |       |       |      | CurveFitFailed    |
| vatB-02      | 38A |       |       |      | CurveFitFailed    |
| vatC-01      | 38A |       |       |      | NoAmplification   |
| vatC-02      | 38A | 37.35 | 86.26 | 1.79 |                   |
| vatE-01      | 38A | 29.97 | 76.66 | 2.15 |                   |
| vatE-02      | 38A |       |       |      | NoAmplification   |
| vgaA-01      | 38A |       |       |      | NoAmplification   |
| vgaA-02      | 38A |       |       |      | NoAmplification   |
| vgb-01       | 38A | 32.94 | 75.98 | 1.99 |                   |
| vgbB-01      | 38A | 39.68 | 85.95 | 1.76 |                   |
| vgbB-02      | 38A |       |       |      | NoAmplification   |
| yceE/mdtG-0  | 38A |       |       |      | NoAmplification   |
| yceE/mdtG-0  | 38A |       |       |      | CurveFitFailed    |
| yceL/mdtH-0  | 38A | 37.57 | 82.39 | 1.76 | MultipleMeltPeaks |
| yceL/mdtH-0  | 38A |       |       |      | NoAmplification   |
| yceL/mdtH-0  | 38A |       |       |      | NoAmplification   |
| yidY/mdtL-01 | 38A | 32.15 | 85.66 | 1.96 | MultipleMeltPeaks |
| yidY/mdtL-02 | 38A |       |       |      | CurveFitFailed    |































| Assay          | Sample | Ct | Tm    | Efficiency | flag                   |
|----------------|--------|----|-------|------------|------------------------|
| 16S rRNA       | 38B    |    | 22.91 | 82.08      | 1.99                   |
| aac            | 38B    |    | 30.53 | 78.1       | 1.93 MultipleMeltPeaks |
| aac(6')-Ib(akz | 38B    |    |       |            | NoAmplification        |
| aac(6')-Ib(akz | 38B    |    | 35.5  | 81.07      | 1.87 MultipleMeltPeaks |
| aac(6')-Ib(akz | 38B    |    | 35.3  | 83.91      | 1.86 MultipleMeltPeaks |
| aac(6')-II     | 38B    |    | 36.37 | 80.88      | 1.66 MultipleMeltPeaks |
| aac(6')I1      | 38B    |    | 38.33 | 92.52      | 1.64 MultipleMeltPeaks |
| aacA/aphD      | 38B    |    |       |            | NoAmplification        |
| aacC           | 38B    |    | 35.66 | 88.99      | 1.77                   |
| aacC1          | 38B    |    |       |            | NoAmplification        |
| aacC2          | 38B    |    |       |            | NoAmplification        |
| aacC4          | 38B    |    | 35.85 | 83.66      | 1.78                   |
| aadA-01        | 38B    |    |       |            | NoAmplification        |
| aadA-02        | 38B    |    | 36.53 | 80.62      | 1.87                   |
| aadA-1-01      | 38B    |    |       |            | NoAmplification        |
| aadA-1-02      | 38B    |    |       |            | NoAmplification        |
| aadA1          | 38B    |    | 36.39 | 84.53      | 1.83                   |
| aadA2-01       | 38B    |    |       |            | NoAmplification        |
| aadA2-02       | 38B    |    | 35.33 | 74.57      | 1.98 MultipleMeltPeaks |
| aadA2-03       | 38B    |    |       |            | NoAmplification        |
| aadA5-01       | 38B    |    | 38.63 | 83.93      | 1.69                   |
| aadA5-02       | 38B    |    | 34.92 | 83.44      | 1.88 MultipleMeltPeaks |
| aadA9-01       | 38B    |    | 37.35 | 90.01      | 1.87                   |
| aadA9-02       | 38B    |    | 36.97 | 74.05      | 2.22 MultipleMeltPeaks |
| aadD           | 38B    |    |       |            | NoAmplification        |
| aadE           | 38B    |    |       |            | NoAmplification        |
| acrA-01        | 38B    |    | 34.78 | 88.72      | 1.85                   |
| acrA-02        | 38B    |    |       |            | CurveFitFailed         |
| acrA-03        | 38B    |    |       |            | NoAmplification        |
| acrA-04        | 38B    |    | 35.55 | 80.42      | 1.91                   |
| acrA-05        | 38B    |    | 32.3  | 80.09      | 1.94 MultipleMeltPeaks |
| acrB-01        | 38B    |    | 38.76 | 75.72      | 1.85                   |
| acrF           | 38B    |    | 30.81 | 83.13      | 1.79                   |
| acrR-01        | 38B    |    |       |            | NoAmplification        |
| acrR-02        | 38B    |    | 38.46 | 90.28      | 1.74 MultipleMeltPeaks |
| Actin          | 38B    |    | 22.89 | 87.18      | 1.95                   |
| adeA           | 38B    |    |       |            | NoAmplification        |
| ampC-01        | 38B    |    | 41.36 | 62.09      | 1.43 MultipleMeltPeaks |
| ampC-02        | 38B    |    |       |            | NoAmplification        |
| ampC-04        | 38B    |    | 33.86 | 78.18      | 2.01 MultipleMeltPeaks |
| ampC-05        | 38B    |    |       |            | NoAmplification        |
| ampC-06        | 38B    |    |       |            | NoAmplification        |
| ampC-07        | 38B    |    | 33.33 | 76.38      | 1.95                   |
| ampC-09        | 38B    |    |       |            | NoAmplification        |
| ampC/blaDH     | 38B    |    | 29.69 | 85.38      | 1.98                   |

|                            |     |       |       |      |                   |
|----------------------------|-----|-------|-------|------|-------------------|
| aph                        | 38B |       |       |      | NoAmplification   |
| aph(2')-Id-01              | 38B |       |       |      | NoAmplification   |
| aph(2')-Id-02              | 38B |       |       |      | NoAmplification   |
| aph6ia                     | 38B |       |       |      | NoAmplification   |
| aphA1(aka k <sub>z</sub> ) | 38B |       |       |      | NoAmplification   |
| bacA-01                    | 38B |       |       |      | NoAmplification   |
| bacA-02                    | 38B | 38.64 | 87.67 | 1.62 |                   |
| BETA-globin                | 38B | 24.73 | 84.07 | 1.98 |                   |
| bla-ACC-1                  | 38B |       |       |      | CurveFitFailed    |
| bla-L1                     | 38B | 31.84 | 87.61 | 1.95 |                   |
| bla1                       | 38B |       |       |      | NoAmplification   |
| blaCMY                     | 38B |       |       |      | NoAmplification   |
| blaCMY2-01                 | 38B | 34.55 | 83.81 | 1.97 |                   |
| blaCMY2-02                 | 38B | 30.8  | 82.62 | 1.98 |                   |
| blaCTX-M-01                | 38B |       |       |      | NoAmplification   |
| blaCTX-M-02                | 38B |       |       |      | CurveFitFailed    |
| blaCTX-M-03                | 38B |       |       |      | NoAmplification   |
| blaCTX-M-04                | 38B | 37.2  | 83.84 | 1.79 |                   |
| blaCTX-M-05                | 38B | 34.94 | 75.55 | 1.79 |                   |
| blaCTX-M-06                | 38B |       |       |      | NoAmplification   |
| blaGES                     | 38B |       |       |      | NoAmplification   |
| blaIMP-01                  | 38B |       |       |      | NoAmplification   |
| blaIMP-02                  | 38B |       |       |      | NoAmplification   |
| blaMOX/blaC                | 38B | 38.93 | 82.38 | 1.82 | MultipleMeltPeaks |
| blaOCH                     | 38B |       |       |      | NoAmplification   |
| blaOKP                     | 38B |       |       |      | NoAmplification   |
| blaOXA1/blaC               | 38B |       |       |      | NoAmplification   |
| blaOXA10-01                | 38B |       |       |      | NoAmplification   |
| blaOXA10-02                | 38B |       |       |      | NoAmplification   |
| blaOXY                     | 38B |       |       |      | CurveFitFailed    |
| blaPAO                     | 38B |       |       |      | NoAmplification   |
| blaPER                     | 38B |       |       |      | CurveFitFailed    |
| blaPSE                     | 38B |       |       |      | NoAmplification   |
| blaROB                     | 38B |       |       |      | NoAmplification   |
| blaSFO                     | 38B | 30.26 | 86.37 | 1.89 |                   |
| blaSHV-01                  | 38B |       |       |      | NoAmplification   |
| blaSHV-02                  | 38B |       |       |      | NoAmplification   |
| blaTEM                     | 38B | 29.35 | 79.52 | 1.99 |                   |
| blaTLA                     | 38B |       |       |      | NoAmplification   |
| blaVEB                     | 38B |       |       |      | NoAmplification   |
| blaVIM                     | 38B |       |       |      | NoAmplification   |
| blaZ                       | 38B |       |       |      | NoAmplification   |
| carB                       | 38B |       |       |      | CurveFitFailed    |
| catA1                      | 38B |       |       |      | NoAmplification   |
| catB3                      | 38B |       |       |      | NoAmplification   |
| catB8                      | 38B | 31.02 | 81.15 | 1.98 |                   |

|            |     |       |       |      |                              |
|------------|-----|-------|-------|------|------------------------------|
| ceoA       | 38B | 30    | 82.41 | 1.93 |                              |
| cepA       | 38B |       |       |      | NoAmplification              |
| cfiA       | 38B | 32.45 | 84.51 | 1.96 |                              |
| cfr        | 38B |       |       |      | NoAmplification              |
| cfxA       | 38B | 29.03 | 77.46 | 2.06 |                              |
| cmeA       | 38B |       |       |      | CurveFitFailed               |
| cmlA1-01   | 38B |       |       |      | NoAmplification              |
| cmlA1-02   | 38B |       |       |      | NoAmplification              |
| cmr        | 38B |       |       |      | CurveFitFailed               |
| cmx(A)     | 38B | 27.52 | 84.87 | 1.93 | MultipleMeltPeaks            |
| cphA-01    | 38B | 34.65 | 81.33 | 1.9  |                              |
| cphA-02    | 38B | 35.69 | 78.12 | 1.9  |                              |
| dfrA1      | 38B |       |       |      | NoAmplification              |
| dfrA12     | 38B | 39.39 | 85.86 | 1.59 |                              |
| emrD       | 38B | 38.71 | 87.82 | 1.71 | MultipleMeltPeaks            |
| ereA       | 38B |       |       |      | NoAmplification              |
| ereB       | 38B |       |       |      | CurveFitFailed               |
| erm(34)    | 38B |       |       |      | NoAmplification              |
| erm(35)    | 38B |       |       |      | NoAmplification              |
| erm(36)    | 38B |       |       |      | NoAmplification              |
| ermA       | 38B |       |       |      | NoAmplification              |
| ermA/ermTR | 38B |       |       |      | NoAmplification              |
| ermB       | 38B |       |       |      | NoAmplification              |
| ermC       | 38B | 38.28 | 75.41 | 1.99 |                              |
| ermF       | 38B |       |       |      | NoAmplification              |
| ermJ/ermD  | 38B |       |       |      | NoAmplification              |
| ermK-01    | 38B |       |       |      | NoAmplification              |
| ermK-02    | 38B | 36.87 | 64.82 | 2.38 | MultipleMeltPeaks            |
| ermT-01    | 38B |       |       |      | NoAmplification              |
| ermT-02    | 38B | 36.92 | 70.7  | 1.88 |                              |
| ermX       | 38B | 23.66 | 83.89 | 1.9  |                              |
| ermY       | 38B |       |       |      | NoAmplification              |
| fabK       | 38B | 27.13 | 77.56 | 2.07 |                              |
| floR       | 38B |       |       |      | NoAmplification              |
| folA       | 38B |       |       |      | NoAmplification              |
| fosB       | 38B |       |       |      | LowEfficiency, CtIsSmall, S: |
| fosX       | 38B |       |       |      | NoAmplification              |
| fox5       | 38B | 29.16 | 86.78 | 1.97 |                              |
| imiR       | 38B |       |       |      | CurveFitFailed               |
| ImrA-01    | 38B | 39.76 | 61.84 | 1.77 | MultipleMeltPeaks            |
| intl       | 38B | 31.84 | 84.83 | 1.96 |                              |
| intl1      | 38B | 21.76 | 87.27 | 2.01 |                              |
| IS613      | 38B | 34.94 | 78.32 | 2.02 |                              |
| lnuA-01    | 38B |       |       |      | LowEfficiency, CtIsSmall, C: |
| lnuB-01    | 38B |       |       |      | NoAmplification              |
| lnuB-02    | 38B |       |       |      | NoAmplification              |

|               |     |       |       |      |                   |
|---------------|-----|-------|-------|------|-------------------|
| lnuC          | 38B | 38.83 | 64.52 | 1.48 | MultipleMeltPeaks |
| marR-01       | 38B | 35.57 | 85.22 | 1.86 |                   |
| matA/mel      | 38B | 36.65 | 86.49 | 1.83 | MultipleMeltPeaks |
| mdet1         | 38B |       |       |      | NoAmplification   |
| mdtA          | 38B |       |       |      | NoAmplification   |
| mdtE/yhiU     | 38B |       |       |      | NoAmplification   |
| mecA          | 38B |       |       |      | NoAmplification   |
| mefA          | 38B | 33.34 | 80.63 | 1.95 |                   |
| mepA          | 38B | 36.31 | 84.91 | 1.85 |                   |
| mexA          | 38B |       |       |      | NoAmplification   |
| mexD          | 38B | 32.28 | 80.34 | 2.02 |                   |
| mexE          | 38B |       |       |      | NoAmplification   |
| mexF          | 38B | 31.16 | 87.58 | 2.04 |                   |
| mphA-01       | 38B | 27.18 | 84.26 | 1.93 |                   |
| mphA-02       | 38B | 31.76 | 86.78 | 1.97 |                   |
| mphB          | 38B |       |       |      | NoAmplification   |
| mphC          | 38B |       |       |      | NoAmplification   |
| msrA-01       | 38B |       |       |      | NoAmplification   |
| msrC-01       | 38B |       |       |      | NoAmplification   |
| mtrC-01       | 38B |       |       |      | NoAmplification   |
| mtrC-02       | 38B |       |       |      | NoAmplification   |
| mtrD-02       | 38B | 30.02 | 81.5  | 2    |                   |
| mtrD-03       | 38B |       |       |      | NoAmplification   |
| NDM1          | 38B |       |       |      | NoAmplification   |
| nimE          | 38B |       |       |      | NoAmplification   |
| nisB          | 38B |       |       |      | NoAmplification   |
| oleC          | 38B |       |       |      | NoAmplification   |
| oprD          | 38B | 30.05 | 86.81 | 1.97 | MultipleMeltPeaks |
| oprJ          | 38B | 38.88 | 75.28 | 1.75 | MultipleMeltPeaks |
| pbp           | 38B |       |       |      | NoAmplification   |
| pbp2x         | 38B | 30.1  | 75.18 | 2.07 |                   |
| Pbp5          | 38B |       |       |      | NoAmplification   |
| penA          | 38B | 36.85 | 88.69 | 1.66 |                   |
| pikR1         | 38B |       |       |      | NoAmplification   |
| pikR2         | 38B | 34.33 | 87.92 | 1.96 | MultipleMeltPeaks |
| pmrA          | 38B | 30.64 | 81.68 | 2.03 |                   |
| pncA          | 38B | 31.72 | 84.46 | 1.93 | MultipleMeltPeaks |
| putative mult | 38B |       |       |      | CurveFitFailed    |
| qac           | 38B |       |       |      | NoAmplification   |
| qacA          | 38B |       |       |      | NoAmplification   |
| qacA/qacB     | 38B |       |       |      | NoAmplification   |
| qacEdelta1-0  | 38B |       |       |      | NoAmplification   |
| qacEdelta1-0  | 38B | 34.46 | 75.95 | 2.01 |                   |
| qacH-01       | 38B | 36.6  | 83.88 | 1.85 |                   |
| qacH-02       | 38B | 38.22 | 84.06 | 1.61 |                   |
| qnrA          | 38B | 42.02 | 74.57 | 1.79 |                   |

|              |     |       |       |      |                   |
|--------------|-----|-------|-------|------|-------------------|
| rarD-02      | 38B |       |       |      | NoAmplification   |
| sat4         | 38B |       |       |      | NoAmplification   |
| sdeB         | 38B |       |       |      | NoAmplification   |
| spcN-01      | 38B |       |       |      | NoAmplification   |
| speA         | 38B |       |       |      | NoAmplification   |
| str          | 38B |       |       |      | NoAmplification   |
| strA         | 38B |       |       |      | NoAmplification   |
| strB         | 38B | 40.55 | 80.83 | 1.83 | MultipleMeltPeaks |
| sul1         | 38B |       |       |      | NoAmplification   |
| sul2         | 38B |       |       |      | CurveFitFailed    |
| sulA/foIP-01 | 38B | 27.66 | 81.58 | 1.98 |                   |
| sulA/foIP-03 | 38B | 35.4  | 81.13 | 1.91 |                   |
| tet(32)      | 38B |       |       |      | NoAmplification   |
| tet(34)      | 38B | 36.45 | 74.52 | 1.86 |                   |
| tet(35)      | 38B |       |       |      | NoAmplification   |
| tet(36)-A    | 38B |       |       |      | NoAmplification   |
| tet(36)-B    | 38B |       |       |      | NoAmplification   |
| tet(37)      | 38B | 37.27 | 76.12 | 1.8  | MultipleMeltPeaks |
| tetA-01      | 38B | 30.71 | 85.2  | 1.95 |                   |
| tetA-02      | 38B |       |       |      | NoAmplification   |
| tetB-01      | 38B | 33.8  | 86.22 | 1.92 |                   |
| tetB-02      | 38B | 32.85 | 74.93 | 2.02 |                   |
| tetC-01      | 38B |       |       |      | NoAmplification   |
| tetC-02      | 38B |       |       |      | NoAmplification   |
| tetD-01      | 38B |       |       |      | NoAmplification   |
| tetD-02      | 38B | 38.91 | 82.62 | 1.76 | MultipleMeltPeaks |
| tetE         | 38B |       |       |      | NoAmplification   |
| tetG-01      | 38B | 36.33 | 83.49 | 1.84 | MultipleMeltPeaks |
| tetG-02      | 38B |       |       |      | CurveFitFailed    |
| tetH         | 38B |       |       |      | NoAmplification   |
| tetJ         | 38B |       |       |      | NoAmplification   |
| tetK         | 38B |       |       |      | NoAmplification   |
| tetL-01      | 38B |       |       |      | NoAmplification   |
| tetL-02      | 38B | 36.05 | 85.45 | 1.73 |                   |
| tetM-01      | 38B | 37.79 | 77.15 | 1.79 | MultipleMeltPeaks |
| tetM-02      | 38B |       |       |      | NoAmplification   |
| tetO-01      | 38B |       |       |      | NoAmplification   |
| tetPA        | 38B |       |       |      | NoAmplification   |
| tetPB-01     | 38B |       |       |      | NoAmplification   |
| tetPB-02     | 38B | 33.11 | 84.81 | 2.04 |                   |
| tetPB-03     | 38B |       |       |      | NoAmplification   |
| tetPB-05     | 38B |       |       |      | NoAmplification   |
| tetQ         | 38B |       |       |      | NoAmplification   |
| tetR-02      | 38B | 33.76 | 89.29 | 1.88 | MultipleMeltPeaks |
| tetR-03      | 38B |       |       |      | NoAmplification   |
| tetS         | 38B | 43.72 | 79.22 | 1.67 |                   |

|             |     |       |       |      |                              |
|-------------|-----|-------|-------|------|------------------------------|
| tetT        | 38B |       |       |      | NoAmplification              |
| tetU-01     | 38B |       |       |      | NoAmplification              |
| tetV        | 38B |       |       |      | NoAmplification              |
| tetW-01     | 38B |       |       |      | NoAmplification              |
| tetX        | 38B |       |       |      | NoAmplification              |
| tnpA-01     | 38B |       |       |      | NoAmplification              |
| tnpA-02     | 38B | 36.49 | 80.43 | 1.8  | MultipleMeltPeaks            |
| tnpA-03     | 38B | 33.4  | 75.08 | 2.16 |                              |
| tnpA-04     | 38B |       |       |      | NoAmplification              |
| tnpA-05     | 38B | 29.14 | 80.83 | 1.93 |                              |
| tnpA-07     | 38B |       |       |      | NoAmplification              |
| tolC-01     | 38B |       |       |      | CurveFitFailed               |
| tolC-02     | 38B | 33.02 | 87.86 | 1.98 |                              |
| tolC-03     | 38B | 31.96 | 85.59 | 1.93 |                              |
| Tp614       | 38B | 39.79 | 78.79 | 1.82 | MultipleMeltPeaks            |
| ttgA        | 38B |       |       |      | NoAmplification              |
| ttgB        | 38B | 38.7  | 84.78 | 1.78 | MultipleMeltPeaks            |
| vanA        | 38B |       |       |      | NoAmplification              |
| vanB-01     | 38B | 34.51 | 81.55 | 1.92 |                              |
| vanC-01     | 38B |       |       |      | CurveFitFailed               |
| vanC-02     | 38B |       |       |      | NoAmplification              |
| vanC-03     | 38B | 29.09 | 86.23 | 1.93 |                              |
| vanC1       | 38B |       |       |      | NoAmplification              |
| vanC2/vanC3 | 38B | 39.89 | 84.46 | 1.74 | MultipleMeltPeaks            |
| vanG        | 38B |       |       |      | NoAmplification              |
| vanHB       | 38B |       |       |      | NoAmplification              |
| vanHD       | 38B |       |       |      | NoAmplification              |
| vanRA-01    | 38B |       |       |      | NoAmplification              |
| vanRA-02    | 38B |       |       |      | NoAmplification              |
| vanRB       | 38B | 38.23 | 75.17 | 1.82 | MultipleMeltPeaks            |
| vanRC       | 38B |       |       |      | NoAmplification              |
| vanRC4      | 38B |       |       |      | NoAmplification              |
| vanRD       | 38B |       |       |      | NoAmplification              |
| vanSA       | 38B |       |       |      | NoAmplification              |
| vanSB       | 38B | 30.36 | 74.48 | 2.06 |                              |
| vanSC-01    | 38B |       |       |      | CurveFitFailed               |
| vanSC-02    | 38B |       |       |      | NoAmplification              |
| vanTC-01    | 38B |       |       |      | NoAmplification              |
| vanTC-02    | 38B |       |       |      | NoAmplification              |
| vanTE       | 38B | 38.67 | 61.79 | 1.68 | MultipleMeltPeaks            |
| vanTG       | 38B |       |       |      | NoAmplification              |
| vanWB       | 38B |       |       |      | BadR2, CtlIsSmall, Saturatio |
| vanWG       | 38B | 31.87 | 74.9  | 1.98 |                              |
| vanXA       | 38B |       |       |      | NoAmplification              |
| vanXB       | 38B |       |       |      | NoAmplification              |
| vanXD       | 38B | 30.16 | 75.39 | 2    |                              |

|              |     |       |       |      |                   |
|--------------|-----|-------|-------|------|-------------------|
| vanYB        | 38B |       |       |      | NoAmplification   |
| vanYD-01     | 38B | 31.94 | 81.56 | 1.82 |                   |
| vanYD-02     | 38B | 38.64 | 74.41 | 1.74 | MultipleMeltPeaks |
| vatB-01      | 38B |       |       |      | NoAmplification   |
| vatB-02      | 38B |       |       |      | CurveFitFailed    |
| vatC-01      | 38B | 30.2  | 73.37 | 2.02 |                   |
| vatC-02      | 38B | 37.08 | 87.6  | 1.76 |                   |
| vatE-01      | 38B | 30.18 | 76.35 | 2.14 |                   |
| vatE-02      | 38B |       |       |      | NoAmplification   |
| vgaA-01      | 38B |       |       |      | NoAmplification   |
| vgaA-02      | 38B |       |       |      | CurveFitFailed    |
| vgb-01       | 38B |       |       |      | CurveFitFailed    |
| vgbB-01      | 38B |       |       |      | NoAmplification   |
| vgbB-02      | 38B |       |       |      | NoAmplification   |
| yceE/mdtG-0  | 38B |       |       |      | NoAmplification   |
| yceE/mdtG-0  | 38B | 39.41 | 78.85 | 1.71 |                   |
| yceL/mdtH-0  | 38B | 39.73 | 81.74 | 1.7  | MultipleMeltPeaks |
| yceL/mdtH-0  | 38B |       |       |      | NoAmplification   |
| yceL/mdtH-0  | 38B | 38.25 | 87.18 | 1.81 | MultipleMeltPeaks |
| yidY/mdtL-01 | 38B | 32.43 | 82.76 | 1.97 |                   |
| yidY/mdtL-02 | 38B | 40.84 | 76.61 | 1.8  |                   |































| Assay          | Sample | Ct | Tm    | Efficiency | flag                   |
|----------------|--------|----|-------|------------|------------------------|
| 16S rRNA       | 38C    |    | 17.37 | 82.34      | 1.93                   |
| aac            | 38C    |    | 30.22 | 86.42      | 1.68 MultipleMeltPeaks |
| aac(6')-Ib(akz | 38C    |    |       |            | NoAmplification        |
| aac(6')-Ib(akz | 38C    |    | 34.61 | 83         | 1.93 MultipleMeltPeaks |
| aac(6')-Ib(akz | 38C    |    | 34.83 | 83.27      | 1.86 MultipleMeltPeaks |
| aac(6')-II     | 38C    |    |       |            | NoAmplification        |
| aac(6')I1      | 38C    |    |       |            | NoAmplification        |
| aacA/aphD      | 38C    |    |       |            | NoAmplification        |
| aacC           | 38C    |    | 33.8  | 86.11      | 1.75 MultipleMeltPeaks |
| aacC1          | 38C    |    |       |            | NoAmplification        |
| aacC2          | 38C    |    |       |            | NoAmplification        |
| aacC4          | 38C    |    | 29.96 | 82.83      | 1.74                   |
| aadA-01        | 38C    |    |       |            | NoAmplification        |
| aadA-02        | 38C    |    |       |            | NoAmplification        |
| aadA-1-01      | 38C    |    |       |            | NoAmplification        |
| aadA-1-02      | 38C    |    |       |            | NoAmplification        |
| aadA1          | 38C    |    | 35.74 | 84.07      | 1.98                   |
| aadA2-01       | 38C    |    |       |            | NoAmplification        |
| aadA2-02       | 38C    |    |       |            | NoAmplification        |
| aadA2-03       | 38C    |    |       |            | NoAmplification        |
| aadA5-01       | 38C    |    |       |            | NoAmplification        |
| aadA5-02       | 38C    |    | 30.21 | 83.96      | 1.89                   |
| aadA9-01       | 38C    |    | 36.76 | 87.08      | 1.91                   |
| aadA9-02       | 38C    |    |       |            | NoAmplification        |
| aadD           | 38C    |    | 29.84 | 80.9       | 1.94                   |
| aadE           | 38C    |    |       |            | NoAmplification        |
| acrA-01        | 38C    |    | 31.88 | 88.79      | 1.97                   |
| acrA-02        | 38C    |    |       |            | NoAmplification        |
| acrA-03        | 38C    |    |       |            | NoAmplification        |
| acrA-04        | 38C    |    | 34.99 | 80.35      | 1.95                   |
| acrA-05        | 38C    |    | 33.02 | 88.72      | 1.96                   |
| acrB-01        | 38C    |    |       |            | NoAmplification        |
| acrF           | 38C    |    |       |            | NoAmplification        |
| acrR-01        | 38C    |    | 36.25 | 77.83      | 1.84 MultipleMeltPeaks |
| acrR-02        | 38C    |    |       |            | NoAmplification        |
| Actin          | 38C    |    | 19.2  | 87.21      | 1.96                   |
| adeA           | 38C    |    |       |            | NoAmplification        |
| ampC-01        | 38C    |    |       |            | NoAmplification        |
| ampC-02        | 38C    |    |       |            | NoAmplification        |
| ampC-04        | 38C    |    | 33.83 | 78.37      | 1.85                   |
| ampC-05        | 38C    |    |       |            | NoAmplification        |
| ampC-06        | 38C    |    |       |            | NoAmplification        |
| ampC-07        | 38C    |    |       |            | NoAmplification        |
| ampC-09        | 38C    |    |       |            | NoAmplification        |
| ampC/blaDH     | 38C    |    | 32.22 | 76.82      | 1.84 MultipleMeltPeaks |

|                          |     |       |       |      |                   |
|--------------------------|-----|-------|-------|------|-------------------|
| aph                      | 38C |       |       |      | NoAmplification   |
| aph(2')-Id-01            | 38C |       |       |      | NoAmplification   |
| aph(2')-Id-02            | 38C |       |       |      | NoAmplification   |
| aph6ia                   | 38C |       |       |      | NoAmplification   |
| aphA1(aka k <sub>z</sub> | 38C |       |       |      | NoAmplification   |
| bacA-01                  | 38C | 37.04 | 88.51 | 1.84 | MultipleMeltPeaks |
| bacA-02                  | 38C | 35.02 | 87.19 | 1.76 |                   |
| BETA-globin              | 38C | 19.92 | 84.23 | 1.99 |                   |
| bla-ACC-1                | 38C |       |       |      | NoAmplification   |
| bla-L1                   | 38C | 31.68 | 84.02 | 2    |                   |
| bla1                     | 38C |       |       |      | NoAmplification   |
| blaCMY                   | 38C | 35.68 | 79.06 | 1.97 |                   |
| blaCMY2-01               | 38C |       |       |      | NoAmplification   |
| blaCMY2-02               | 38C | 30.83 | 82.78 | 1.81 | MultipleMeltPeaks |
| blaCTX-M-01              | 38C |       |       |      | NoAmplification   |
| blaCTX-M-02              | 38C |       |       |      | NoAmplification   |
| blaCTX-M-03              | 38C |       |       |      | NoAmplification   |
| blaCTX-M-04              | 38C |       |       |      | NoAmplification   |
| blaCTX-M-05              | 38C |       |       |      | NoAmplification   |
| blaCTX-M-06              | 38C |       |       |      | NoAmplification   |
| blaGES                   | 38C |       |       |      | NoAmplification   |
| blaIMP-01                | 38C |       |       |      | NoAmplification   |
| blaIMP-02                | 38C |       |       |      | NoAmplification   |
| blaMOX/blaC              | 38C |       |       |      | NoAmplification   |
| blaOCH                   | 38C |       |       |      | NoAmplification   |
| blaOKP                   | 38C |       |       |      | NoAmplification   |
| blaOXA1/blaC             | 38C |       |       |      | NoAmplification   |
| blaOXA10-01              | 38C |       |       |      | NoAmplification   |
| blaOXA10-02              | 38C |       |       |      | NoAmplification   |
| blaOXY                   | 38C |       |       |      | NoAmplification   |
| blaPAO                   | 38C |       |       |      | NoAmplification   |
| blaPER                   | 38C |       |       |      | NoAmplification   |
| blaPSE                   | 38C |       |       |      | NoAmplification   |
| blaROB                   | 38C |       |       |      | NoAmplification   |
| blaSFO                   | 38C | 32.21 | 84.85 | 1.79 | MultipleMeltPeaks |
| blaSHV-01                | 38C |       |       |      | NoAmplification   |
| blaSHV-02                | 38C |       |       |      | NoAmplification   |
| blaTEM                   | 38C |       |       |      | NoAmplification   |
| blaTLA                   | 38C |       |       |      | NoAmplification   |
| blaVEB                   | 38C |       |       |      | NoAmplification   |
| blaVIM                   | 38C |       |       |      | NoAmplification   |
| blaZ                     | 38C | 29.53 | 73.31 | 1.58 |                   |
| carB                     | 38C |       |       |      | NoAmplification   |
| catA1                    | 38C |       |       |      | NoAmplification   |
| catB3                    | 38C | 32.46 | 87.85 | 1.96 |                   |
| catB8                    | 38C | 32.25 | 79.8  | 1.89 |                   |

|            |     |       |       |      |                              |
|------------|-----|-------|-------|------|------------------------------|
| ceoA       | 38C | 31.4  | 82.42 | 1.96 |                              |
| cepA       | 38C |       |       |      | NoAmplification              |
| cfiA       | 38C | 33.04 | 76    | 1.7  | MultipleMeltPeaks            |
| cfr        | 38C |       |       |      | NoAmplification              |
| cfxA       | 38C | 24.84 | 77.26 | 1.64 |                              |
| cmeA       | 38C |       |       |      | NoAmplification              |
| cmlA1-01   | 38C |       |       |      | NoAmplification              |
| cmlA1-02   | 38C |       |       |      | NoAmplification              |
| cmr        | 38C |       |       |      | NoAmplification              |
| cmx(A)     | 38C | 32.51 | 84.79 | 1.61 |                              |
| cphA-01    | 38C |       |       |      | NoAmplification              |
| cphA-02    | 38C |       |       |      | CurveFitFailed               |
| dfrA1      | 38C |       |       |      | NoAmplification              |
| dfrA12     | 38C |       |       |      | NoAmplification              |
| emrD       | 38C |       |       |      | NoAmplification              |
| ereA       | 38C |       |       |      | NoAmplification              |
| ereB       | 38C | 33.05 | 88.28 | 2.02 | MultipleMeltPeaks            |
| erm(34)    | 38C |       |       |      | NoAmplification              |
| erm(35)    | 38C |       |       |      | NoAmplification              |
| erm(36)    | 38C |       |       |      | NoAmplification              |
| ermA       | 38C |       |       |      | NoAmplification              |
| ermA/ermTR | 38C |       |       |      | NoAmplification              |
| ermB       | 38C |       |       |      | NoAmplification              |
| ermC       | 38C |       |       |      | NoAmplification              |
| ermF       | 38C |       |       |      | NoAmplification              |
| ermJ/ermD  | 38C |       |       |      | NoAmplification              |
| ermK-01    | 38C |       |       |      | NoAmplification              |
| ermK-02    | 38C |       |       |      | NoAmplification              |
| ermT-01    | 38C |       |       |      | NoAmplification              |
| ermT-02    | 38C |       |       |      | NoAmplification              |
| ermX       | 38C |       |       |      | NoAmplification              |
| ermY       | 38C |       |       |      | NoAmplification              |
| fabK       | 38C | 21.49 | 78.02 | 1.95 |                              |
| floR       | 38C |       |       |      | NoAmplification              |
| folA       | 38C |       |       |      | NoAmplification              |
| fosB       | 38C |       |       |      | LowEfficiency, CtIsSmall, S: |
| fosX       | 38C |       |       |      | NoAmplification              |
| fox5       | 38C | 32.35 | 86.34 | 1.6  |                              |
| imiR       | 38C |       |       |      | NoAmplification              |
| ImrA-01    | 38C | 42.99 | 82.59 | 1.74 |                              |
| intl       | 38C | 32.84 | 85.06 | 1.78 |                              |
| intl1      | 38C | 22.58 | 87.17 | 1.94 | MultipleMeltPeaks            |
| IS613      | 38C |       |       |      | NoAmplification              |
| lnuA-01    | 38C |       |       |      | NoAmplification              |
| lnuB-01    | 38C |       |       |      | NoAmplification              |
| lnuB-02    | 38C |       |       |      | NoAmplification              |

|               |     |       |       |      |                   |
|---------------|-----|-------|-------|------|-------------------|
| lnuC          | 38C |       |       |      | NoAmplification   |
| marR-01       | 38C | 35.12 | 83.16 | 1.93 |                   |
| matA/mel      | 38C | 19.94 | 77.52 | 1.99 |                   |
| mdet1         | 38C |       |       |      | NoAmplification   |
| mdtA          | 38C |       |       |      | CurveFitFailed    |
| mdtE/yhiU     | 38C |       |       |      | NoAmplification   |
| mecA          | 38C |       |       |      | NoAmplification   |
| mefA          | 38C | 19.55 | 80.54 | 1.94 |                   |
| mepA          | 38C |       |       |      | NoAmplification   |
| mexA          | 38C |       |       |      | NoAmplification   |
| mexD          | 38C | 36.57 | 79.67 | 1.89 |                   |
| mexE          | 38C | 39.56 | 83.29 | 1.66 |                   |
| mexF          | 38C | 31.71 | 75.64 | 1.66 | MultipleMeltPeaks |
| mphA-01       | 38C | 31.83 | 86.86 | 1.89 |                   |
| mphA-02       | 38C | 33.51 | 86.79 | 1.5  |                   |
| mphB          | 38C |       |       |      | NoAmplification   |
| mphC          | 38C |       |       |      | NoAmplification   |
| msrA-01       | 38C |       |       |      | NoAmplification   |
| msrC-01       | 38C |       |       |      | NoAmplification   |
| mtrC-01       | 38C |       |       |      | NoAmplification   |
| mtrC-02       | 38C |       |       |      | NoAmplification   |
| mtrD-02       | 38C | 29.13 | 82.28 | 1.88 |                   |
| mtrD-03       | 38C |       |       |      | NoAmplification   |
| NDM1          | 38C |       |       |      | NoAmplification   |
| nimE          | 38C |       |       |      | NoAmplification   |
| nisB          | 38C |       |       |      | NoAmplification   |
| oleC          | 38C | 33.69 | 89.15 | 1.87 |                   |
| oprD          | 38C | 29.36 | 91.89 | 1.96 |                   |
| oprJ          | 38C | 35.69 | 79.25 | 1.77 | MultipleMeltPeaks |
| pbp           | 38C | 40.83 | 79.3  | 1.69 |                   |
| pbp2x         | 38C | 24.46 | 74.87 | 1.72 |                   |
| Pbp5          | 38C |       |       |      | NoAmplification   |
| penA          | 38C |       |       |      | NoAmplification   |
| pikR1         | 38C |       |       |      | NoAmplification   |
| pikR2         | 38C | 30.22 | 85.26 | 1.74 |                   |
| pmrA          | 38C | 21.21 | 78.56 | 1.92 | MultipleMeltPeaks |
| pncA          | 38C | 34.97 | 91.42 | 1.87 | MultipleMeltPeaks |
| putative mult | 38C |       |       |      | NoAmplification   |
| qac           | 38C |       |       |      | NoAmplification   |
| qacA          | 38C |       |       |      | NoAmplification   |
| qacA/qacB     | 38C |       |       |      | NoAmplification   |
| qacEdelta1-0  | 38C |       |       |      | NoAmplification   |
| qacEdelta1-0  | 38C |       |       |      | NoAmplification   |
| qacH-01       | 38C | 30.8  | 79.71 | 1.83 |                   |
| qacH-02       | 38C | 42.21 | 84    | 1.47 |                   |
| qnrA          | 38C |       |       |      | NoAmplification   |



|              |     |       |       |      |                   |
|--------------|-----|-------|-------|------|-------------------|
| rarD-02      | 38C |       |       |      | NoAmplification   |
| sat4         | 38C |       |       |      | NoAmplification   |
| sdeB         | 38C |       |       |      | NoAmplification   |
| spcN-01      | 38C |       |       |      | NoAmplification   |
| speA         | 38C |       |       |      | NoAmplification   |
| str          | 38C |       |       |      | NoAmplification   |
| strA         | 38C |       |       |      | NoAmplification   |
| strB         | 38C | 28.21 | 83.75 | 1.89 |                   |
| sul1         | 38C |       |       |      | NoAmplification   |
| sul2         | 38C |       |       |      | NoAmplification   |
| sulA/foIP-01 | 38C | 20.1  | 81.15 | 2.05 |                   |
| sulA/foIP-03 | 38C | 19.84 | 83.45 | 2.01 |                   |
| tet(32)      | 38C |       |       |      | NoAmplification   |
| tet(34)      | 38C | 33.09 | 75.17 | 1.93 |                   |
| tet(35)      | 38C |       |       |      | NoAmplification   |
| tet(36)-A    | 38C |       |       |      | NoAmplification   |
| tet(36)-B    | 38C |       |       |      | NoAmplification   |
| tet(37)      | 38C | 35.28 | 75.21 | 1.89 | MultipleMeltPeaks |
| tetA-01      | 38C | 31.63 | 81.72 | 1.81 |                   |
| tetA-02      | 38C |       |       |      | NoAmplification   |
| tetB-01      | 38C | 36    | 86.34 | 1.89 |                   |
| tetB-02      | 38C | 28.81 | 79.49 | 1.96 |                   |
| tetC-01      | 38C |       |       |      | NoAmplification   |
| tetC-02      | 38C |       |       |      | NoAmplification   |
| tetD-01      | 38C |       |       |      | NoAmplification   |
| tetD-02      | 38C | 36.05 | 76.21 | 1.95 |                   |
| tetE         | 38C |       |       |      | NoAmplification   |
| tetG-01      | 38C | 35.45 | 82.62 | 1.9  | MultipleMeltPeaks |
| tetG-02      | 38C | 36.31 | 89.14 | 1.76 |                   |
| tetH         | 38C |       |       |      | NoAmplification   |
| tetJ         | 38C |       |       |      | NoAmplification   |
| tetK         | 38C |       |       |      | NoAmplification   |
| tetL-01      | 38C |       |       |      | NoAmplification   |
| tetL-02      | 38C |       |       |      | NoAmplification   |
| tetM-01      | 38C | 25.24 | 75.89 | 1.88 |                   |
| tetM-02      | 38C | 24.61 | 77.48 | 1.86 |                   |
| tetO-01      | 38C |       |       |      | NoAmplification   |
| tetPA        | 38C |       |       |      | NoAmplification   |
| tetPB-01     | 38C |       |       |      | NoAmplification   |
| tetPB-02     | 38C | 33.39 | 84.83 | 1.77 |                   |
| tetPB-03     | 38C |       |       |      | NoAmplification   |
| tetPB-05     | 38C |       |       |      | NoAmplification   |
| tetQ         | 38C | 27.49 | 75.76 | 1.99 |                   |
| tetR-02      | 38C | 34.05 | 80.03 | 1.93 | MultipleMeltPeaks |
| tetR-03      | 38C |       |       |      | NoAmplification   |
| tetS         | 38C |       |       |      | NoAmplification   |

|             |     |       |       |      |                   |
|-------------|-----|-------|-------|------|-------------------|
| tetT        | 38C |       |       |      | NoAmplification   |
| tetU-01     | 38C |       |       |      | NoAmplification   |
| tetV        | 38C |       |       |      | NoAmplification   |
| tetW-01     | 38C |       |       |      | NoAmplification   |
| tetX        | 38C |       |       |      | NoAmplification   |
| tnpA-01     | 38C |       |       |      | NoAmplification   |
| tnpA-02     | 38C | 30.03 | 84.85 | 1.7  |                   |
| tnpA-03     | 38C | 29.74 | 78.12 | 1.77 |                   |
| tnpA-04     | 38C |       |       |      | NoAmplification   |
| tnpA-05     | 38C | 27.34 | 80.76 | 1.83 |                   |
| tnpA-07     | 38C |       |       |      | NoAmplification   |
| tolC-01     | 38C |       |       |      | NoAmplification   |
| tolC-02     | 38C | 33.33 | 85.12 | 1.98 |                   |
| tolC-03     | 38C | 32.59 | 85.71 | 1.9  | MultipleMeltPeaks |
| Tp614       | 38C |       |       |      | NoAmplification   |
| ttgA        | 38C |       |       |      | NoAmplification   |
| ttgB        | 38C | 37.74 | 88.03 | 1.7  | MultipleMeltPeaks |
| vanA        | 38C |       |       |      | NoAmplification   |
| vanB-01     | 38C | 33.48 | 83.83 | 1.74 |                   |
| vanC-01     | 38C |       |       |      | NoAmplification   |
| vanC-02     | 38C |       |       |      | NoAmplification   |
| vanC-03     | 38C | 27.41 | 91.66 | 1.88 |                   |
| vanC1       | 38C |       |       |      | NoAmplification   |
| vanC2/vanC3 | 38C | 35.42 | 84.99 | 1.91 |                   |
| vanG        | 38C |       |       |      | NoAmplification   |
| vanHB       | 38C |       |       |      | NoAmplification   |
| vanHD       | 38C | 36.37 | 82.7  | 1.8  |                   |
| vanRA-01    | 38C |       |       |      | NoAmplification   |
| vanRA-02    | 38C |       |       |      | NoAmplification   |
| vanRB       | 38C | 35.5  | 81.65 | 1.92 |                   |
| vanRC       | 38C |       |       |      | NoAmplification   |
| vanRC4      | 38C |       |       |      | NoAmplification   |
| vanRD       | 38C |       |       |      | NoAmplification   |
| vanSA       | 38C |       |       |      | NoAmplification   |
| vanSB       | 38C | 34.31 | 73.09 | 1.95 |                   |
| vanSC-01    | 38C | 35.21 | 82.7  | 2    |                   |
| vanSC-02    | 38C |       |       |      | NoAmplification   |
| vanTC-01    | 38C |       |       |      | NoAmplification   |
| vanTC-02    | 38C |       |       |      | NoAmplification   |
| vanTE       | 38C |       |       |      | NoAmplification   |
| vanTG       | 38C |       |       |      | NoAmplification   |
| vanWB       | 38C |       |       |      | NoAmplification   |
| vanWG       | 38C |       |       |      | NoAmplification   |
| vanXA       | 38C |       |       |      | NoAmplification   |
| vanXB       | 38C |       |       |      | NoAmplification   |
| vanXD       | 38C | 37.1  | 73.46 | 1.94 | MultipleMeltPeaks |

|              |     |       |       |      |                   |
|--------------|-----|-------|-------|------|-------------------|
| vanYB        | 38C | 34.64 | 77.16 | 1.94 | MultipleMeltPeaks |
| vanYD-01     | 38C | 32.37 | 82.25 | 1.71 |                   |
| vanYD-02     | 38C | 36.07 | 88.86 | 1.85 |                   |
| vatB-01      | 38C |       |       |      | NoAmplification   |
| vatB-02      | 38C |       |       |      | NoAmplification   |
| vatC-01      | 38C |       |       |      | NoAmplification   |
| vatC-02      | 38C | 37.96 | 86.26 | 1.72 |                   |
| vatE-01      | 38C | 34.75 | 75.83 | 2    |                   |
| vatE-02      | 38C | 36.05 | 75.55 | 1.96 |                   |
| vgaA-01      | 38C |       |       |      | NoAmplification   |
| vgaA-02      | 38C |       |       |      | NoAmplification   |
| vgb-01       | 38C |       |       |      | NoAmplification   |
| vgbB-01      | 38C |       |       |      | NoAmplification   |
| vgbB-02      | 38C |       |       |      | NoAmplification   |
| yceE/mdtG-0  | 38C |       |       |      | NoAmplification   |
| yceE/mdtG-0  | 38C |       |       |      | NoAmplification   |
| yceL/mdtH-0  | 38C | 36.7  | 79.99 | 1.69 | MultipleMeltPeaks |
| yceL/mdtH-0  | 38C |       |       |      | NoAmplification   |
| yceL/mdtH-0  | 38C |       |       |      | NoAmplification   |
| yidY/mdtL-01 | 38C | 32.44 | 82.57 | 1.86 |                   |
| yidY/mdtL-02 | 38C |       |       |      | NoAmplification   |































| Assay          | Sample | Ct | Tm    | Efficiency | flag                         |
|----------------|--------|----|-------|------------|------------------------------|
| 16S rRNA       | 39A    |    | 17.32 | 81.8       | 2.06                         |
| aac            | 39A    |    | 29.3  | 86.34      | 1.56 MultipleMeltPeaks       |
| aac(6')-Ib(akz | 39A    |    |       |            | CurveFitFailed               |
| aac(6')-Ib(akz | 39A    |    | 30    | 81.83      | 2.08 MultipleMeltPeaks       |
| aac(6')-Ib(akz | 39A    |    | 32.47 | 84.93      | 2.09                         |
| aac(6')-II     | 39A    |    | 33.44 | 84.12      | 1.93 MultipleMeltPeaks       |
| aac(6')I1      | 39A    |    | 36.49 | 88.57      | 1.79                         |
| aacA/aphD      | 39A    |    |       |            | CurveFitFailed               |
| aacC           | 39A    |    | 31.24 | 91.86      | 1.93 MultipleMeltPeaks       |
| aacC1          | 39A    |    | 34.11 | 91.44      | 1.92                         |
| aacC2          | 39A    |    |       |            | NoAmplification              |
| aacC4          | 39A    |    | 34.19 | 90.33      | 1.97                         |
| aadA-01        | 39A    |    |       |            | CurveFitFailed               |
| aadA-02        | 39A    |    |       |            | CtIsSmall, CurveFitFailed, F |
| aadA-1-01      | 39A    |    | 32.99 | 81.26      | 1.79                         |
| aadA-1-02      | 39A    |    |       |            | CurveFitFailed               |
| aadA1          | 39A    |    | 32.76 | 84.28      | 2.12                         |
| aadA2-01       | 39A    |    |       |            | NoAmplification              |
| aadA2-02       | 39A    |    | 33.26 | 74.88      | 1.92                         |
| aadA2-03       | 39A    |    |       |            | CtIsSmall, CurveFitFailed, F |
| aadA5-01       | 39A    |    |       |            | BadR2, LowEfficiency, CtIsS  |
| aadA5-02       | 39A    |    | 34.23 | 83.24      | 1.93 MultipleMeltPeaks       |
| aadA9-01       | 39A    |    | 36.11 | 86.1       | 1.85 MultipleMeltPeaks       |
| aadA9-02       | 39A    |    |       |            | LowEfficiency, CtIsSmall, Ci |
| aadD           | 39A    |    |       |            | LowEfficiency, CtIsSmall, Ci |
| aadE           | 39A    |    |       |            | LowEfficiency, CtIsSmall, Ci |
| acrA-01        | 39A    |    | 28.54 | 88.71      | 1.94 MultipleMeltPeaks       |
| acrA-02        | 39A    |    |       |            | CurveFitFailed               |
| acrA-03        | 39A    |    |       |            | CurveFitFailed               |
| acrA-04        | 39A    |    | 33.45 | 80.18      | 1.84 MultipleMeltPeaks       |
| acrA-05        | 39A    |    | 30.94 | 88.41      | 2.01 MultipleMeltPeaks       |
| acrB-01        | 39A    |    | 32.2  | 86.53      | 2.01                         |
| acrF           | 39A    |    | 28.57 | 83.01      | 1.53                         |
| acrR-01        | 39A    |    | 34.09 | 87.27      | 1.99 MultipleMeltPeaks       |
| acrR-02        | 39A    |    |       |            | CurveFitFailed               |
| Actin          | 39A    |    | 19.29 | 86.91      | 2.02                         |
| adeA           | 39A    |    |       |            | LowEfficiency, CtIsSmall, Ci |
| ampC-01        | 39A    |    | 32.12 | 84.79      | 1.85 MultipleMeltPeaks       |
| ampC-02        | 39A    |    |       |            | LowEfficiency, CtIsSmall, Ci |
| ampC-04        | 39A    |    | 32.34 | 78.62      | 1.76                         |
| ampC-05        | 39A    |    |       |            | CurveFitFailed               |
| ampC-06        | 39A    |    |       |            | CurveFitFailed               |
| ampC-07        | 39A    |    | 33.72 | 88.29      | 1.88                         |
| ampC-09        | 39A    |    |       |            | CurveFitFailed               |
| ampC/blaDH     | 39A    |    | 29.54 | 84.87      | 1.98 MultipleMeltPeaks       |

|                            |     |       |       |      |                              |
|----------------------------|-----|-------|-------|------|------------------------------|
| aph                        | 39A |       |       |      | LowEfficiency, CtIsSmall, Ci |
| aph(2')-Id-01              | 39A |       |       |      | CurveFitFailed               |
| aph(2')-Id-02              | 39A |       |       |      | CurveFitFailed               |
| aph6ia                     | 39A |       |       |      | CurveFitFailed               |
| aphA1(aka k <sub>z</sub> ) | 39A |       |       |      | LowEfficiency, CtIsSmall, Ci |
| bacA-01                    | 39A | 32.85 | 74.7  | 1.93 | MultipleMeltPeaks            |
| bacA-02                    | 39A | 33.14 | 87.98 | 1.91 | MultipleMeltPeaks            |
| BETA-globin                | 39A | 20.45 | 84.1  | 2.03 |                              |
| bla-ACC-1                  | 39A |       |       |      | CtIsSmall, CurveFitFailed, F |
| bla-L1                     | 39A | 27.27 | 86.52 | 2.05 |                              |
| bla1                       | 39A |       |       |      | CurveFitFailed               |
| blaCMY                     | 39A |       |       |      | CurveFitFailed               |
| blaCMY2-01                 | 39A |       |       |      | CurveFitFailed               |
| blaCMY2-02                 | 39A | 29.15 | 85.29 | 1.98 |                              |
| blaCTX-M-01                | 39A |       |       |      | LowEfficiency, CtIsSmall, Ci |
| blaCTX-M-02                | 39A |       |       |      | LowEfficiency, CtIsSmall, S: |
| blaCTX-M-03                | 39A |       |       |      | LowEfficiency, CtIsSmall, Ci |
| blaCTX-M-04                | 39A |       |       |      | CurveFitFailed               |
| blaCTX-M-05                | 39A | 34.68 | 76.18 | 1.86 |                              |
| blaCTX-M-06                | 39A |       |       |      | CurveFitFailed               |
| blaGES                     | 39A |       |       |      | CurveFitFailed               |
| blaIMP-01                  | 39A |       |       |      | NoAmplification              |
| blaIMP-02                  | 39A |       |       |      | LowEfficiency, CtIsSmall, Ci |
| blaMOX/blaC                | 39A | 34.87 | 80.86 | 2.03 | MultipleMeltPeaks            |
| blaOCH                     | 39A |       |       |      | NoAmplification              |
| blaOKP                     | 39A |       |       |      | NoAmplification              |
| blaOXA1/blaC               | 39A |       |       |      | CurveFitFailed               |
| blaOXA10-01                | 39A |       |       |      | CurveFitFailed               |
| blaOXA10-02                | 39A |       |       |      | LowEfficiency, CtIsSmall, Ci |
| blaOXY                     | 39A |       |       |      | CurveFitFailed               |
| blaPAO                     | 39A |       |       |      | NoAmplification              |
| blaPER                     | 39A |       |       |      | CurveFitFailed               |
| blaPSE                     | 39A |       |       |      | LowEfficiency, CtIsSmall, Ci |
| blaROB                     | 39A | 35.47 | 91.85 | 1.82 |                              |
| blaSFO                     | 39A | 32.37 | 89.9  | 1.96 |                              |
| blaSHV-01                  | 39A |       |       |      | CurveFitFailed               |
| blaSHV-02                  | 39A |       |       |      | CurveFitFailed               |
| blaTEM                     | 39A |       |       |      | NoAmplification              |
| blaTLA                     | 39A |       |       |      | CurveFitFailed               |
| blaVEB                     | 39A |       |       |      | NoAmplification              |
| blaVIM                     | 39A |       |       |      | NoAmplification              |
| blaZ                       | 39A |       |       |      | CurveFitFailed               |
| carB                       | 39A |       |       |      | CurveFitFailed               |
| catA1                      | 39A |       |       |      | NoAmplification              |
| catB3                      | 39A | 33.33 | 87.58 | 1.9  |                              |
| catB8                      | 39A | 26.08 | 84.35 | 2    | MultipleMeltPeaks            |

|            |     |       |       |      |                              |
|------------|-----|-------|-------|------|------------------------------|
| ceoA       | 39A | 28.68 | 82.19 | 2.06 | MultipleMeltPeaks            |
| cepA       | 39A |       |       |      | CurveFitFailed               |
| cfiA       | 39A | 32.41 | 83.85 | 1.59 | MultipleMeltPeaks            |
| cfr        | 39A |       |       |      | LowEfficiency, CtIsSmall, Ci |
| cfxA       | 39A | 23.15 | 77.27 | 1.75 |                              |
| cmeA       | 39A |       |       |      | CurveFitFailed               |
| cmlA1-01   | 39A |       |       |      | CurveFitFailed               |
| cmlA1-02   | 39A |       |       |      | BadR2, LowEfficiency, CtIsS  |
| cmr        | 39A |       |       |      | LowEfficiency, CtIsSmall, Ci |
| cmx(A)     | 39A | 28.22 | 86.64 | 1.89 | MultipleMeltPeaks            |
| cphA-01    | 39A | 35.63 | 80.83 | 1.93 | MultipleMeltPeaks            |
| cphA-02    | 39A | 33.4  | 84.31 | 2    |                              |
| dfrA1      | 39A |       |       |      | CurveFitFailed               |
| dfrA12     | 39A |       |       |      | NoAmplification              |
| emrD       | 39A |       |       |      | CurveFitFailed               |
| ereA       | 39A |       |       |      | CurveFitFailed               |
| ereB       | 39A | 34.48 | 86.22 | 2.2  | MultipleMeltPeaks            |
| erm(34)    | 39A |       |       |      | NoAmplification              |
| erm(35)    | 39A |       |       |      | CurveFitFailed               |
| erm(36)    | 39A |       |       |      | CurveFitFailed               |
| ermA       | 39A |       |       |      | LowEfficiency, CtIsSmall, Ci |
| ermA/ermTR | 39A |       |       |      | NoAmplification              |
| ermB       | 39A | 24.5  | 74.69 | 1.95 |                              |
| ermC       | 39A |       |       |      | CurveFitFailed               |
| ermF       | 39A | 23.03 | 74.29 | 2.04 |                              |
| ermJ/ermD  | 39A |       |       |      | CurveFitFailed               |
| ermK-01    | 39A | 36.96 | 82.76 | 1.91 | MultipleMeltPeaks            |
| ermK-02    | 39A | 34.29 | 76.57 | 1.84 |                              |
| ermT-01    | 39A |       |       |      | CurveFitFailed               |
| ermT-02    | 39A |       |       |      | CurveFitFailed               |
| ermX       | 39A | 21.61 | 83.71 | 1.94 |                              |
| ermY       | 39A |       |       |      | CurveFitFailed               |
| fabK       | 39A | 26.61 | 79.69 | 1.92 |                              |
| floR       | 39A |       |       |      | NoAmplification              |
| folA       | 39A |       |       |      | NoAmplification              |
| fosB       | 39A |       |       |      | LowEfficiency, CtIsSmall, Ci |
| fosX       | 39A |       |       |      | CurveFitFailed               |
| fox5       | 39A | 28.37 | 86.41 | 1.79 |                              |
| imiR       | 39A |       |       |      | LowEfficiency, CtIsSmall, Ci |
| ImrA-01    | 39A |       |       |      | LowEfficiency, CtIsSmall, Ci |
| intl       | 39A | 30.23 | 84.84 | 1.85 | MultipleMeltPeaks            |
| intl1      | 39A | 20.51 | 87.3  | 2.05 |                              |
| IS613      | 39A | 27.31 | 79.46 | 1.87 |                              |
| lnuA-01    | 39A |       |       |      | CurveFitFailed               |
| lnuB-01    | 39A |       |       |      | LowEfficiency, CtIsSmall, Ci |
| lnuB-02    | 39A |       |       |      | LowEfficiency, CtIsSmall, Ci |

|               |     |       |       |      |                              |
|---------------|-----|-------|-------|------|------------------------------|
| lnuC          | 39A | 32.29 | 87.55 | 1.79 |                              |
| marR-01       | 39A | 32.19 | 85.25 | 1.92 |                              |
| matA/mel      | 39A | 20.04 | 77.47 | 2.16 |                              |
| mdet1         | 39A |       |       |      | CurveFitFailed               |
| mdtA          | 39A |       |       |      | BadR2, LowEfficiency, CtIsS  |
| mdtE/yhiU     | 39A | 36    | 92.85 | 1.71 |                              |
| mecA          | 39A |       |       |      | CurveFitFailed               |
| mefA          | 39A | 19.39 | 80.5  | 2.05 |                              |
| mepA          | 39A | 32.63 | 91.96 | 1.75 |                              |
| mexA          | 39A |       |       |      | BadR2, LowEfficiency, CtIsS  |
| mexD          | 39A | 33.22 | 80.03 | 1.96 |                              |
| mexE          | 39A | 35.49 | 88.68 | 1.95 |                              |
| mexF          | 39A | 29.11 | 84.43 | 1.67 | MultipleMeltPeaks            |
| mphA-01       | 39A | 30.49 | 87.4  | 2.06 | MultipleMeltPeaks            |
| mphA-02       | 39A | 30.4  | 86.13 | 1.52 | MultipleMeltPeaks            |
| mphB          | 39A |       |       |      | LowEfficiency, CtIsSmall, Ci |
| mphC          | 39A |       |       |      | CurveFitFailed               |
| msrA-01       | 39A |       |       |      | LowEfficiency, CtIsSmall, Ci |
| msrC-01       | 39A |       |       |      | NoAmplification              |
| mtrC-01       | 39A |       |       |      | CurveFitFailed               |
| mtrC-02       | 39A | 33.87 | 81.85 | 1.98 |                              |
| mtrD-02       | 39A | 28.86 | 80.53 | 1.81 | MultipleMeltPeaks            |
| mtrD-03       | 39A | 34.4  | 82.71 | 1.9  |                              |
| NDM1          | 39A |       |       |      | NoAmplification              |
| nimE          | 39A |       |       |      | NoAmplification              |
| nisB          | 39A | 33.58 | 81.97 | 1.96 |                              |
| oleC          | 39A |       |       |      | CurveFitFailed               |
| oprD          | 39A | 29.53 | 85.81 | 1.9  |                              |
| oprJ          | 39A | 34.48 | 88.7  | 1.75 | MultipleMeltPeaks            |
| pbp           | 39A |       |       |      | LowEfficiency, CtIsSmall, Ci |
| pbp2x         | 39A |       |       |      | CurveFitFailed               |
| Pbp5          | 39A |       |       |      | LowEfficiency, CtIsSmall, Ci |
| penA          | 39A |       |       |      | BadR2, LowEfficiency, CtIsS  |
| pikR1         | 39A |       |       |      | CurveFitFailed               |
| pikR2         | 39A | 32.03 | 84.91 | 1.73 |                              |
| pmrA          | 39A | 25.72 | 78.75 | 2.04 |                              |
| pncA          | 39A | 27.33 | 84.76 | 1.9  |                              |
| putative mul1 | 39A |       |       |      | CurveFitFailed               |
| qac           | 39A |       |       |      | CtIsSmall, CurveFitFailed, F |
| qacA          | 39A |       |       |      | CurveFitFailed               |
| qacA/qacB     | 39A |       |       |      | CurveFitFailed               |
| qacEdelta1-0  | 39A |       |       |      | CurveFitFailed               |
| qacEdelta1-0  | 39A | 35.34 | 80.22 | 2    |                              |
| qacH-01       | 39A | 34.32 | 88.05 | 1.82 | MultipleMeltPeaks            |
| qacH-02       | 39A | 34.31 | 84.03 | 1.79 |                              |
| qnrA          | 39A |       |       |      | CtIsSmall, CurveFitFailed, F |

|              |     |       |       |      |                              |
|--------------|-----|-------|-------|------|------------------------------|
| rarD-02      | 39A |       |       |      | CtIsSmall, CurveFitFailed, F |
| sat4         | 39A |       |       |      | CurveFitFailed               |
| sdeB         | 39A |       |       |      | CurveFitFailed               |
| spcN-01      | 39A |       |       |      | CurveFitFailed               |
| speA         | 39A |       |       |      | CurveFitFailed               |
| str          | 39A |       |       |      | CurveFitFailed               |
| strA         | 39A |       |       |      | CurveFitFailed               |
| strB         | 39A | 25.33 | 83.98 | 1.92 |                              |
| sul1         | 39A | 34.05 | 89.85 | 1.78 |                              |
| sul2         | 39A |       |       |      | CurveFitFailed               |
| sulA/foIP-01 | 39A | 20.68 | 80.93 | 2.07 |                              |
| sulA/foIP-03 | 39A | 21.23 | 83    | 2.11 |                              |
| tet(32)      | 39A |       |       |      | LowEfficiency, CtIsSmall, Ci |
| tet(34)      | 39A | 33.87 | 75.04 | 1.99 |                              |
| tet(35)      | 39A |       |       |      | NoAmplification              |
| tet(36)-A    | 39A |       |       |      | BadR2, LowEfficiency, CtIsS  |
| tet(36)-B    | 39A |       |       |      | CurveFitFailed               |
| tet(37)      | 39A | 27.62 | 75.79 | 1.94 | MultipleMeltPeaks            |
| tetA-01      | 39A | 31.07 | 85.1  | 2.04 |                              |
| tetA-02      | 39A |       |       |      | CurveFitFailed               |
| tetB-01      | 39A | 25.74 | 88.72 | 1.89 | MultipleMeltPeaks            |
| tetB-02      | 39A | 24.98 | 79.56 | 2.05 |                              |
| tetC-01      | 39A | 25.35 | 74.92 | 1.85 |                              |
| tetC-02      | 39A | 26.29 | 75.9  | 2.12 |                              |
| tetD-01      | 39A |       |       |      | LowEfficiency, CtIsSmall, Ci |
| tetD-02      | 39A |       |       |      | LowEfficiency, CtIsSmall, Ci |
| tetE         | 39A |       |       |      | CurveFitFailed               |
| tetG-01      | 39A | 35.2  | 82.66 | 2    |                              |
| tetG-02      | 39A | 32.87 | 87.11 | 1.79 |                              |
| tetH         | 39A |       |       |      | CurveFitFailed               |
| tetJ         | 39A |       |       |      | LowEfficiency, CtIsSmall, Ci |
| tetK         | 39A |       |       |      | CurveFitFailed               |
| tetL-01      | 39A |       |       |      | CurveFitFailed               |
| tetL-02      | 39A | 36.1  | 83.74 | 1.76 |                              |
| tetM-01      | 39A | 21.18 | 75.86 | 2.17 |                              |
| tetM-02      | 39A | 21.07 | 77.36 | 2.13 |                              |
| tetO-01      | 39A | 29.09 | 76.41 | 2    |                              |
| tetPA        | 39A |       |       |      | NoAmplification              |
| tetPB-01     | 39A | 36.41 | 83.2  | 1.9  |                              |
| tetPB-02     | 39A | 29.82 | 84.76 | 1.73 |                              |
| tetPB-03     | 39A |       |       |      | CurveFitFailed               |
| tetPB-05     | 39A |       |       |      | CurveFitFailed               |
| tetQ         | 39A | 24.98 | 75.94 | 2.1  |                              |
| tetR-02      | 39A | 31.14 | 90.03 | 1.82 |                              |
| tetR-03      | 39A | 25.45 | 76    | 1.99 |                              |
| tetS         | 39A |       |       |      | LowEfficiency, CtIsSmall, Ci |

|             |     |       |       |      |                              |
|-------------|-----|-------|-------|------|------------------------------|
| tetT        | 39A |       |       |      | LowEfficiency, CtIsSmall, Ci |
| tetU-01     | 39A |       |       |      | CurveFitFailed               |
| tetV        | 39A |       |       |      | CurveFitFailed               |
| tetW-01     | 39A |       |       |      | CurveFitFailed               |
| tetX        | 39A |       |       |      | BadR2, CtIsSmall, Saturatio  |
| tnpA-01     | 39A |       |       |      | CtIsSmall, CurveFitFailed, F |
| tnpA-02     | 39A | 25.14 | 84.87 | 1.71 |                              |
| tnpA-03     | 39A |       |       |      | CurveFitFailed               |
| tnpA-04     | 39A |       |       |      | CurveFitFailed               |
| tnpA-05     | 39A | 30.56 | 80.54 | 1.9  |                              |
| tnpA-07     | 39A |       |       |      | CurveFitFailed               |
| tolC-01     | 39A |       |       |      | LowEfficiency, CtIsSmall, Ci |
| tolC-02     | 39A | 31    | 87.63 | 1.99 | MultipleMeltPeaks            |
| tolC-03     | 39A | 30.43 | 87.39 | 1.98 | MultipleMeltPeaks            |
| Tp614       | 39A |       |       |      | CurveFitFailed               |
| ttgA        | 39A |       |       |      | CurveFitFailed               |
| ttgB        | 39A |       |       |      | CtIsSmall, CurveFitFailed, F |
| vanA        | 39A |       |       |      | CurveFitFailed               |
| vanB-01     | 39A | 31.95 | 88.85 | 1.72 | MultipleMeltPeaks            |
| vanC-01     | 39A |       |       |      | CurveFitFailed               |
| vanC-02     | 39A |       |       |      | CurveFitFailed               |
| vanC-03     | 39A | 26.36 | 85.94 | 1.98 | MultipleMeltPeaks            |
| vanC1       | 39A |       |       |      | CurveFitFailed               |
| vanC2/vanC3 | 39A | 31.71 | 80.05 | 1.79 | MultipleMeltPeaks            |
| vanG        | 39A |       |       |      | BadR2, CtIsSmall, Saturatio  |
| vanHB       | 39A | 34.91 | 78.72 | 1.89 |                              |
| vanHD       | 39A |       |       |      | CtIsSmall, CurveFitFailed, F |
| vanRA-01    | 39A |       |       |      | LowEfficiency, CtIsSmall, Ci |
| vanRA-02    | 39A | 35.36 | 79.91 | 1.88 | MultipleMeltPeaks            |
| vanRB       | 39A |       |       |      | CurveFitFailed               |
| vanRC       | 39A |       |       |      | CurveFitFailed               |
| vanRC4      | 39A |       |       |      | CurveFitFailed               |
| vanRD       | 39A |       |       |      | BadR2, CtIsSmall, Saturatio  |
| vanSA       | 39A |       |       |      | NoAmplification              |
| vanSB       | 39A | 30.82 | 73.72 | 1.91 |                              |
| vanSC-01    | 39A |       |       |      | CurveFitFailed               |
| vanSC-02    | 39A |       |       |      | NoAmplification              |
| vanTC-01    | 39A |       |       |      | CurveFitFailed               |
| vanTC-02    | 39A |       |       |      | NoAmplification              |
| vanTE       | 39A |       |       |      | NoAmplification              |
| vanTG       | 39A |       |       |      | NoAmplification              |
| vanWB       | 39A |       |       |      | CurveFitFailed               |
| vanWG       | 39A |       |       |      | CurveFitFailed               |
| vanXA       | 39A |       |       |      | NoAmplification              |
| vanXB       | 39A |       |       |      | NoAmplification              |
| vanXD       | 39A | 32.33 | 74.9  | 2.02 |                              |

|              |     |       |       |      |                              |
|--------------|-----|-------|-------|------|------------------------------|
| vanYB        | 39A | 36.18 | 85.11 | 1.95 |                              |
| vanYD-01     | 39A | 31.18 | 82.95 | 1.77 |                              |
| vanYD-02     | 39A |       |       |      | CurveFitFailed               |
| vatB-01      | 39A |       |       |      | CurveFitFailed               |
| vatB-02      | 39A |       |       |      | LowEfficiency, CtIsSmall, Ci |
| vatC-01      | 39A | 31.23 | 81.32 | 1.92 |                              |
| vatC-02      | 39A | 31.13 | 86.27 | 1.95 |                              |
| vatE-01      | 39A | 30.48 | 75.67 | 2.07 |                              |
| vatE-02      | 39A |       |       |      | NoAmplification              |
| vgaA-01      | 39A |       |       |      | CurveFitFailed               |
| vgaA-02      | 39A |       |       |      | LowEfficiency, CtIsSmall, Ci |
| vgb-01       | 39A |       |       |      | NoAmplification              |
| vgbB-01      | 39A |       |       |      | CurveFitFailed               |
| vgbB-02      | 39A |       |       |      | CurveFitFailed               |
| yceE/mdtG-0  | 39A |       |       |      | CurveFitFailed               |
| yceE/mdtG-0  | 39A | 32.41 | 80.95 | 1.97 |                              |
| yceL/mdtH-0  | 39A | 33.44 | 83.48 | 1.89 |                              |
| yceL/mdtH-0  | 39A |       |       |      | CurveFitFailed               |
| yceL/mdtH-0  | 39A | 34.97 | 87.92 | 1.8  | MultipleMeltPeaks            |
| yidY/mdtL-01 | 39A | 30.93 | 83.13 | 2.1  |                              |
| yidY/mdtL-02 | 39A |       |       |      | CurveFitFailed               |































| Assay           | Sample | Ct | Tm    | Efficiency | flag                   |
|-----------------|--------|----|-------|------------|------------------------|
| 16S rRNA        | 39B    |    | 13.48 | 82.41      | 1.86                   |
| aac             | 39B    |    | 30.52 | 84.29      | 1.87                   |
| aac(6')-Ib(akz) | 39B    |    |       |            | NoAmplification        |
| aac(6')-Ib(akz) | 39B    |    | 34.65 | 86.28      | 1.89                   |
| aac(6')-Ib(akz) | 39B    |    | 38.05 | 62.52      | 1.78 MultipleMeltPeaks |
| aac(6')-II      | 39B    |    |       |            | NoAmplification        |
| aac(6')I1       | 39B    |    |       |            | NoAmplification        |
| aacA/aphD       | 39B    |    |       |            | NoAmplification        |
| aacC            | 39B    |    | 30.78 | 88.69      | 1.88 MultipleMeltPeaks |
| aacC1           | 39B    |    |       |            | NoAmplification        |
| aacC2           | 39B    |    |       |            | NoAmplification        |
| aacC4           | 39B    |    |       |            | NoAmplification        |
| aadA-01         | 39B    |    |       |            | NoAmplification        |
| aadA-02         | 39B    |    |       |            | NoAmplification        |
| aadA-1-01       | 39B    |    |       |            | NoAmplification        |
| aadA-1-02       | 39B    |    |       |            | NoAmplification        |
| aadA1           | 39B    |    |       |            | NoAmplification        |
| aadA2-01        | 39B    |    | 35.47 | 79.1       | 1.88                   |
| aadA2-02        | 39B    |    | 34.46 | 81.29      | 2                      |
| aadA2-03        | 39B    |    |       |            | NoAmplification        |
| aadA5-01        | 39B    |    |       |            | NoAmplification        |
| aadA5-02        | 39B    |    | 34.75 | 78.37      | 1.95 MultipleMeltPeaks |
| aadA9-01        | 39B    |    |       |            | NoAmplification        |
| aadA9-02        | 39B    |    |       |            | NoAmplification        |
| aadD            | 39B    |    |       |            | NoAmplification        |
| aadE            | 39B    |    |       |            | NoAmplification        |
| acrA-01         | 39B    |    |       |            | CurveFitFailed         |
| acrA-02         | 39B    |    | 35.52 | 82.42      | 1.84                   |
| acrA-03         | 39B    |    |       |            | NoAmplification        |
| acrA-04         | 39B    |    |       |            | CurveFitFailed         |
| acrA-05         | 39B    |    | 38.46 | 86.41      | 1.76 MultipleMeltPeaks |
| acrB-01         | 39B    |    |       |            | NoAmplification        |
| acrF            | 39B    |    | 36.59 | 83.11      | 1.58                   |
| acrR-01         | 39B    |    |       |            | NoAmplification        |
| acrR-02         | 39B    |    | 37.52 | 87.17      | 1.72                   |
| Actin           | 39B    |    | 21.9  | 87.08      | 1.93                   |
| adeA            | 39B    |    |       |            | NoAmplification        |
| ampC-01         | 39B    |    | 37.91 | 78.78      | 1.79                   |
| ampC-02         | 39B    |    |       |            | NoAmplification        |
| ampC-04         | 39B    |    |       |            | NoAmplification        |
| ampC-05         | 39B    |    |       |            | NoAmplification        |
| ampC-06         | 39B    |    | 39.99 | 83.69      | 1.75                   |
| ampC-07         | 39B    |    |       |            | NoAmplification        |
| ampC-09         | 39B    |    |       |            | NoAmplification        |
| ampC/blaDH      | 39B    |    | 34.34 | 77.25      | 1.92                   |

|                            |     |       |       |      |                   |
|----------------------------|-----|-------|-------|------|-------------------|
| aph                        | 39B |       |       |      | NoAmplification   |
| aph(2')-Id-01              | 39B |       |       |      | NoAmplification   |
| aph(2')-Id-02              | 39B |       |       |      | NoAmplification   |
| aph6ia                     | 39B |       |       |      | NoAmplification   |
| aphA1(aka k <sub>z</sub> ) | 39B |       |       |      | NoAmplification   |
| bacA-01                    | 39B |       |       |      | NoAmplification   |
| bacA-02                    | 39B |       |       |      | CurveFitFailed    |
| BETA-globin                | 39B | 22.71 | 84.25 | 1.99 |                   |
| bla-ACC-1                  | 39B |       |       |      | NoAmplification   |
| bla-L1                     | 39B | 32.65 | 86.16 | 1.93 |                   |
| bla1                       | 39B |       |       |      | NoAmplification   |
| blaCMY                     | 39B |       |       |      | CurveFitFailed    |
| blaCMY2-01                 | 39B |       |       |      | NoAmplification   |
| blaCMY2-02                 | 39B | 30.19 | 85.51 | 1.94 |                   |
| blaCTX-M-01                | 39B |       |       |      | NoAmplification   |
| blaCTX-M-02                | 39B |       |       |      | NoAmplification   |
| blaCTX-M-03                | 39B | 37.37 | 80.7  | 1.86 |                   |
| blaCTX-M-04                | 39B | 32.35 | 87.96 | 1.69 | MultipleMeltPeaks |
| blaCTX-M-05                | 39B |       |       |      | NoAmplification   |
| blaCTX-M-06                | 39B |       |       |      | NoAmplification   |
| blaGES                     | 39B |       |       |      | NoAmplification   |
| blaIMP-01                  | 39B |       |       |      | NoAmplification   |
| blaIMP-02                  | 39B |       |       |      | NoAmplification   |
| blaMOX/blaC                | 39B |       |       |      | NoAmplification   |
| blaOCH                     | 39B |       |       |      | NoAmplification   |
| blaOKP                     | 39B |       |       |      | NoAmplification   |
| blaOXA1/blaC               | 39B |       |       |      | NoAmplification   |
| blaOXA10-01                | 39B |       |       |      | NoAmplification   |
| blaOXA10-02                | 39B |       |       |      | NoAmplification   |
| blaOXY                     | 39B |       |       |      | NoAmplification   |
| blaPAO                     | 39B |       |       |      | NoAmplification   |
| blaPER                     | 39B |       |       |      | NoAmplification   |
| blaPSE                     | 39B |       |       |      | NoAmplification   |
| blaROB                     | 39B | 38.95 | 61.94 | 1.74 | MultipleMeltPeaks |
| blaSFO                     | 39B |       |       |      | NoAmplification   |
| blaSHV-01                  | 39B |       |       |      | NoAmplification   |
| blaSHV-02                  | 39B |       |       |      | NoAmplification   |
| blaTEM                     | 39B | 35.02 | 77.83 | 2.07 |                   |
| blaTLA                     | 39B |       |       |      | NoAmplification   |
| blaVEB                     | 39B |       |       |      | NoAmplification   |
| blaVIM                     | 39B |       |       |      | NoAmplification   |
| blaZ                       | 39B |       |       |      | NoAmplification   |
| carB                       | 39B |       |       |      | NoAmplification   |
| catA1                      | 39B |       |       |      | NoAmplification   |
| catB3                      | 39B | 35.86 | 79.99 | 1.82 | MultipleMeltPeaks |
| catB8                      | 39B | 35    | 81.03 | 1.91 |                   |

|            |     |       |       |      |                             |
|------------|-----|-------|-------|------|-----------------------------|
| ceoA       | 39B | 30.61 | 82.45 | 1.98 |                             |
| cepA       | 39B |       |       |      | NoAmplification             |
| cfiA       | 39B |       |       |      | NoAmplification             |
| cfr        | 39B |       |       |      | NoAmplification             |
| cfxA       | 39B | 21.91 | 77.55 | 1.95 |                             |
| cmeA       | 39B |       |       |      | NoAmplification             |
| cmlA1-01   | 39B |       |       |      | NoAmplification             |
| cmlA1-02   | 39B |       |       |      | NoAmplification             |
| cmr        | 39B |       |       |      | NoAmplification             |
| cmx(A)     | 39B | 28.79 | 84.72 | 1.96 |                             |
| cphA-01    | 39B | 34.64 | 80.08 | 1.83 | MultipleMeltPeaks           |
| cphA-02    | 39B | 37.05 | 82.51 | 1.8  |                             |
| dfrA1      | 39B |       |       |      | NoAmplification             |
| dfrA12     | 39B |       |       |      | NoAmplification             |
| emrD       | 39B |       |       |      | NoAmplification             |
| ereA       | 39B |       |       |      | NoAmplification             |
| ereB       | 39B |       |       |      | NoAmplification             |
| erm(34)    | 39B |       |       |      | NoAmplification             |
| erm(35)    | 39B |       |       |      | NoAmplification             |
| erm(36)    | 39B | 41.68 | 81.21 | 1.75 |                             |
| ermA       | 39B |       |       |      | NoAmplification             |
| ermA/ermTR | 39B |       |       |      | NoAmplification             |
| ermB       | 39B |       |       |      | NoAmplification             |
| ermC       | 39B |       |       |      | NoAmplification             |
| ermF       | 39B |       |       |      | NoAmplification             |
| ermJ/ermD  | 39B |       |       |      | NoAmplification             |
| ermK-01    | 39B |       |       |      | NoAmplification             |
| ermK-02    | 39B |       |       |      | NoAmplification             |
| ermT-01    | 39B |       |       |      | NoAmplification             |
| ermT-02    | 39B |       |       |      | NoAmplification             |
| ermX       | 39B |       |       |      | NoAmplification             |
| ermY       | 39B |       |       |      | NoAmplification             |
| fabK       | 39B | 30.13 | 79.06 | 1.98 |                             |
| floR       | 39B |       |       |      | NoAmplification             |
| folA       | 39B |       |       |      | NoAmplification             |
| fosB       | 39B |       |       |      | LowEfficiency, CtlSmall, S: |
| fosX       | 39B |       |       |      | NoAmplification             |
| fox5       | 39B | 32.47 | 86.4  | 1.89 |                             |
| imiR       | 39B |       |       |      | NoAmplification             |
| lmrA-01    | 39B |       |       |      | NoAmplification             |
| intl       | 39B | 32.83 | 84.56 | 1.88 |                             |
| intl1      | 39B | 23.35 | 86.99 | 1.97 | MultipleMeltPeaks           |
| IS613      | 39B |       |       |      | NoAmplification             |
| lnuA-01    | 39B |       |       |      | NoAmplification             |
| lnuB-01    | 39B |       |       |      | NoAmplification             |
| lnuB-02    | 39B |       |       |      | NoAmplification             |

|               |     |       |       |      |                   |
|---------------|-----|-------|-------|------|-------------------|
| lnuC          | 39B |       |       |      | CurveFitFailed    |
| marR-01       | 39B | 37.91 | 85.57 | 1.79 |                   |
| matA/mel      | 39B | 17.94 | 77.72 | 2.05 |                   |
| mdet1         | 39B |       |       |      | NoAmplification   |
| mdtA          | 39B |       |       |      | NoAmplification   |
| mdtE/yhiU     | 39B | 31.84 | 87.5  | 1.94 |                   |
| mecA          | 39B |       |       |      | NoAmplification   |
| mefA          | 39B | 17.46 | 80.63 | 1.99 |                   |
| mepA          | 39B |       |       |      | CurveFitFailed    |
| mexA          | 39B |       |       |      | NoAmplification   |
| mexD          | 39B | 35.34 | 79.88 | 1.99 |                   |
| mexE          | 39B | 35.19 | 88.01 | 1.87 |                   |
| mexF          | 39B | 31.25 | 82.97 | 1.67 | MultipleMeltPeaks |
| mphA-01       | 39B |       |       |      | CurveFitFailed    |
| mphA-02       | 39B | 33.95 | 76.85 | 1.97 |                   |
| mphB          | 39B |       |       |      | NoAmplification   |
| mphC          | 39B |       |       |      | NoAmplification   |
| msrA-01       | 39B |       |       |      | NoAmplification   |
| msrC-01       | 39B |       |       |      | NoAmplification   |
| mtrC-01       | 39B |       |       |      | NoAmplification   |
| mtrC-02       | 39B |       |       |      | NoAmplification   |
| mtrD-02       | 39B | 32.33 | 81.22 | 1.98 |                   |
| mtrD-03       | 39B | 35.47 | 82.39 | 1.83 |                   |
| NDM1          | 39B |       |       |      | NoAmplification   |
| nimE          | 39B |       |       |      | NoAmplification   |
| nisB          | 39B |       |       |      | NoAmplification   |
| oleC          | 39B | 34.88 | 87.57 | 1.88 |                   |
| oprD          | 39B | 33.23 | 81.86 | 1.84 |                   |
| oprJ          | 39B | 40.59 | 87.44 | 1.69 | MultipleMeltPeaks |
| pbp           | 39B |       |       |      | NoAmplification   |
| pbp2x         | 39B |       |       |      | NoAmplification   |
| Pbp5          | 39B |       |       |      | NoAmplification   |
| penA          | 39B |       |       |      | NoAmplification   |
| pikR1         | 39B | 35.13 | 89.89 | 1.85 |                   |
| pikR2         | 39B | 33.41 | 85.12 | 1.97 | MultipleMeltPeaks |
| pmrA          | 39B | 23.82 | 79.64 | 2.01 |                   |
| pncA          | 39B | 33.67 | 88.77 | 1.92 |                   |
| putative mulI | 39B |       |       |      | NoAmplification   |
| qac           | 39B |       |       |      | NoAmplification   |
| qacA          | 39B |       |       |      | NoAmplification   |
| qacA/qacB     | 39B | 37.03 | 83.45 | 1.87 |                   |
| qacEdelta1-0  | 39B |       |       |      | NoAmplification   |
| qacEdelta1-0  | 39B |       |       |      | CurveFitFailed    |
| qacH-01       | 39B |       |       |      | NoAmplification   |
| qacH-02       | 39B |       |       |      | NoAmplification   |
| qnrA          | 39B |       |       |      | NoAmplification   |



|              |     |       |       |      |                   |
|--------------|-----|-------|-------|------|-------------------|
| rarD-02      | 39B | 33.95 | 85.93 | 1.98 |                   |
| sat4         | 39B |       |       |      | NoAmplification   |
| sdeB         | 39B |       |       |      | NoAmplification   |
| spcN-01      | 39B |       |       |      | NoAmplification   |
| speA         | 39B |       |       |      | NoAmplification   |
| str          | 39B |       |       |      | NoAmplification   |
| strA         | 39B |       |       |      | NoAmplification   |
| strB         | 39B |       |       |      | NoAmplification   |
| sul1         | 39B |       |       |      | NoAmplification   |
| sul2         | 39B |       |       |      | NoAmplification   |
| sulA/foIP-01 | 39B | 20.71 | 81.35 | 1.99 |                   |
| sulA/foIP-03 | 39B | 20.65 | 83.3  | 2    |                   |
| tet(32)      | 39B | 31.68 | 80.76 | 2    |                   |
| tet(34)      | 39B | 30.38 | 76.04 | 2.02 |                   |
| tet(35)      | 39B |       |       |      | NoAmplification   |
| tet(36)-A    | 39B |       |       |      | NoAmplification   |
| tet(36)-B    | 39B |       |       |      | NoAmplification   |
| tet(37)      | 39B | 34.3  | 75.47 | 1.94 | MultipleMeltPeaks |
| tetA-01      | 39B |       |       |      | NoAmplification   |
| tetA-02      | 39B | 35.97 | 86.15 | 1.88 |                   |
| tetB-01      | 39B |       |       |      | NoAmplification   |
| tetB-02      | 39B |       |       |      | NoAmplification   |
| tetC-01      | 39B |       |       |      | NoAmplification   |
| tetC-02      | 39B |       |       |      | NoAmplification   |
| tetD-01      | 39B |       |       |      | NoAmplification   |
| tetD-02      | 39B |       |       |      | NoAmplification   |
| tetE         | 39B |       |       |      | NoAmplification   |
| tetG-01      | 39B |       |       |      | NoAmplification   |
| tetG-02      | 39B |       |       |      | NoAmplification   |
| tetH         | 39B |       |       |      | NoAmplification   |
| tetJ         | 39B |       |       |      | NoAmplification   |
| tetK         | 39B |       |       |      | NoAmplification   |
| tetL-01      | 39B |       |       |      | NoAmplification   |
| tetL-02      | 39B |       |       |      | NoAmplification   |
| tetM-01      | 39B |       |       |      | NoAmplification   |
| tetM-02      | 39B | 21.35 | 77.64 | 2.01 |                   |
| tetO-01      | 39B |       |       |      | NoAmplification   |
| tetPA        | 39B |       |       |      | NoAmplification   |
| tetPB-01     | 39B |       |       |      | NoAmplification   |
| tetPB-02     | 39B | 32.86 | 84.87 | 1.97 |                   |
| tetPB-03     | 39B |       |       |      | NoAmplification   |
| tetPB-05     | 39B |       |       |      | NoAmplification   |
| tetQ         | 39B | 29.1  | 76.64 | 2.02 |                   |
| tetR-02      | 39B | 29.53 | 85.63 | 1.66 | MultipleMeltPeaks |
| tetR-03      | 39B |       |       |      | NoAmplification   |
| tetS         | 39B |       |       |      | NoAmplification   |

|             |     |       |       |      |                   |
|-------------|-----|-------|-------|------|-------------------|
| tetT        | 39B |       |       |      | NoAmplification   |
| tetU-01     | 39B |       |       |      | CurveFitFailed    |
| tetV        | 39B |       |       |      | NoAmplification   |
| tetW-01     | 39B |       |       |      | NoAmplification   |
| tetX        | 39B |       |       |      | NoAmplification   |
| tnpA-01     | 39B | 37.72 | 79.59 | 1.86 |                   |
| tnpA-02     | 39B |       |       |      | NoAmplification   |
| tnpA-03     | 39B | 33.27 | 74.9  | 2.09 |                   |
| tnpA-04     | 39B |       |       |      | NoAmplification   |
| tnpA-05     | 39B | 27.47 | 80.79 | 1.84 |                   |
| tnpA-07     | 39B |       |       |      | NoAmplification   |
| tolC-01     | 39B |       |       |      | NoAmplification   |
| tolC-02     | 39B | 34.18 | 87.93 | 1.91 |                   |
| tolC-03     | 39B | 34.36 | 85.92 | 1.92 |                   |
| Tp614       | 39B |       |       |      | NoAmplification   |
| ttgA        | 39B |       |       |      | NoAmplification   |
| ttgB        | 39B |       |       |      | CurveFitFailed    |
| vanA        | 39B |       |       |      | NoAmplification   |
| vanB-01     | 39B |       |       |      | NoAmplification   |
| vanC-01     | 39B |       |       |      | NoAmplification   |
| vanC-02     | 39B |       |       |      | NoAmplification   |
| vanC-03     | 39B | 29.87 | 89.38 | 1.93 | MultipleMeltPeaks |
| vanC1       | 39B |       |       |      | NoAmplification   |
| vanC2/vanC3 | 39B | 34.51 | 80.06 | 2.12 |                   |
| vanG        | 39B |       |       |      | NoAmplification   |
| vanHB       | 39B |       |       |      | NoAmplification   |
| vanHD       | 39B |       |       |      | NoAmplification   |
| vanRA-01    | 39B |       |       |      | NoAmplification   |
| vanRA-02    | 39B |       |       |      | NoAmplification   |
| vanRB       | 39B |       |       |      | NoAmplification   |
| vanRC       | 39B |       |       |      | NoAmplification   |
| vanRC4      | 39B |       |       |      | NoAmplification   |
| vanRD       | 39B |       |       |      | NoAmplification   |
| vanSA       | 39B |       |       |      | NoAmplification   |
| vanSB       | 39B | 31.01 | 74.05 | 1.92 |                   |
| vanSC-01    | 39B |       |       |      | NoAmplification   |
| vanSC-02    | 39B |       |       |      | NoAmplification   |
| vanTC-01    | 39B |       |       |      | NoAmplification   |
| vanTC-02    | 39B |       |       |      | NoAmplification   |
| vanTE       | 39B |       |       |      | NoAmplification   |
| vanTG       | 39B |       |       |      | NoAmplification   |
| vanWB       | 39B |       |       |      | NoAmplification   |
| vanWG       | 39B | 35.75 | 74.65 | 1.93 |                   |
| vanXA       | 39B |       |       |      | NoAmplification   |
| vanXB       | 39B |       |       |      | NoAmplification   |
| vanXD       | 39B | 31.78 | 75.38 | 2.05 |                   |

|              |     |       |       |      |                   |
|--------------|-----|-------|-------|------|-------------------|
| vanYB        | 39B |       |       |      | NoAmplification   |
| vanYD-01     | 39B | 33.45 | 89.21 | 1.72 | MultipleMeltPeaks |
| vanYD-02     | 39B |       |       |      | NoAmplification   |
| vatB-01      | 39B |       |       |      | NoAmplification   |
| vatB-02      | 39B | 39.19 | 79.8  | 1.82 |                   |
| vatC-01      | 39B |       |       |      | NoAmplification   |
| vatC-02      | 39B |       |       |      | NoAmplification   |
| vatE-01      | 39B | 32.2  | 77.22 | 1.94 |                   |
| vatE-02      | 39B |       |       |      | NoAmplification   |
| vgaA-01      | 39B |       |       |      | NoAmplification   |
| vgaA-02      | 39B |       |       |      | NoAmplification   |
| vgb-01       | 39B |       |       |      | NoAmplification   |
| vgbB-01      | 39B |       |       |      | NoAmplification   |
| vgbB-02      | 39B |       |       |      | NoAmplification   |
| yceE/mdtG-0  | 39B |       |       |      | NoAmplification   |
| yceE/mdtG-0  | 39B |       |       |      | NoAmplification   |
| yceL/mdtH-0  | 39B | 38.72 | 88    | 1.77 | MultipleMeltPeaks |
| yceL/mdtH-0  | 39B |       |       |      | NoAmplification   |
| yceL/mdtH-0  | 39B |       |       |      | NoAmplification   |
| yidY/mdtL-01 | 39B | 34.63 | 82.72 | 1.91 |                   |
| yidY/mdtL-02 | 39B |       |       |      | NoAmplification   |































| Assay          | Sample | Ct | Tm    | Efficiency | flag                   |
|----------------|--------|----|-------|------------|------------------------|
| 16S rRNA       | 39C    |    | 14.22 | 82.35      | 1.96                   |
| aac            | 39C    |    | 31.15 | 83.59      | 1.86                   |
| aac(6')-Ib(akz | 39C    |    | 41.44 | 61.84      | 1.95 MultipleMeltPeaks |
| aac(6')-Ib(akz | 39C    |    | 33.21 | 85.99      | 1.98                   |
| aac(6')-Ib(akz | 39C    |    | 32.02 | 78.87      | 2                      |
| aac(6')-II     | 39C    |    | 33.95 | 90.79      | 1.95 MultipleMeltPeaks |
| aac(6')I1      | 39C    |    | 35.48 | 89.88      | 1.77                   |
| aacA/aphD      | 39C    |    |       |            | NoAmplification        |
| aacC           | 39C    |    | 30.33 | 88.66      | 1.94                   |
| aacC1          | 39C    |    |       |            | NoAmplification        |
| aacC2          | 39C    |    |       |            | NoAmplification        |
| aacC4          | 39C    |    | 29.22 | 84.19      | 1.98 MultipleMeltPeaks |
| aadA-01        | 39C    |    | 29.52 | 81.86      | 1.96                   |
| aadA-02        | 39C    |    |       |            | NoAmplification        |
| aadA-1-01      | 39C    |    |       |            | NoAmplification        |
| aadA-1-02      | 39C    |    | 38.11 | 79.6       | 1.77 MultipleMeltPeaks |
| aadA1          | 39C    |    | 38.89 | 84.14      | 1.77                   |
| aadA2-01       | 39C    |    | 38.6  | 86.61      | 1.59 MultipleMeltPeaks |
| aadA2-02       | 39C    |    |       |            | NoAmplification        |
| aadA2-03       | 39C    |    | 35.74 | 79.86      | 1.89                   |
| aadA5-01       | 39C    |    | 34.39 | 86.32      | 1.94 MultipleMeltPeaks |
| aadA5-02       | 39C    |    | 33.38 | 92.38      | 1.95                   |
| aadA9-01       | 39C    |    | 35.94 | 83.24      | 1.81 MultipleMeltPeaks |
| aadA9-02       | 39C    |    | 35.69 | 89.99      | 1.88                   |
| aadD           | 39C    |    |       |            | NoAmplification        |
| aadE           | 39C    |    |       |            | NoAmplification        |
| acrA-01        | 39C    |    | 33.59 | 88.71      | 1.91                   |
| acrA-02        | 39C    |    | 34.38 | 87.99      | 1.91                   |
| acrA-03        | 39C    |    | 36.52 | 83.82      | 1.74 MultipleMeltPeaks |
| acrA-04        | 39C    |    | 32.17 | 85.24      | 1.93                   |
| acrA-05        | 39C    |    | 28.35 | 88.69      | 1.97                   |
| acrB-01        | 39C    |    | 36.41 | 81.24      | 1.86 MultipleMeltPeaks |
| acrF           | 39C    |    | 28.17 | 82.87      | 1.79                   |
| acrR-01        | 39C    |    |       |            | NoAmplification        |
| acrR-02        | 39C    |    | 36.13 | 78.03      | 1.85 MultipleMeltPeaks |
| Actin          | 39C    |    | 21.67 | 86.89      | 1.97                   |
| adeA           | 39C    |    |       |            | NoAmplification        |
| ampC-01        | 39C    |    | 32.35 | 82.81      | 1.89                   |
| ampC-02        | 39C    |    | 35.52 | 83.24      | 1.98 MultipleMeltPeaks |
| ampC-04        | 39C    |    | 36.62 | 77.14      | 1.89                   |
| ampC-05        | 39C    |    |       |            | NoAmplification        |
| ampC-06        | 39C    |    | 40.98 | 83.65      | 1.74 MultipleMeltPeaks |
| ampC-07        | 39C    |    | 32.46 | 88.46      | 1.89                   |
| ampC-09        | 39C    |    | 41.06 | 90.97      | 1.59 MultipleMeltPeaks |
| ampC/blaDH     | 39C    |    | 29.42 | 84.85      | 1.98                   |

|                            |     |       |       |      |                   |
|----------------------------|-----|-------|-------|------|-------------------|
| aph                        | 39C |       |       |      | NoAmplification   |
| aph(2')-Id-01              | 39C |       |       |      | NoAmplification   |
| aph(2')-Id-02              | 39C |       |       |      | NoAmplification   |
| aph6ia                     | 39C | 33.68 | 78.1  | 1.97 |                   |
| aphA1(aka k <sub>z</sub> ) | 39C |       |       |      | NoAmplification   |
| bacA-01                    | 39C | 38.86 | 64.43 | 1.61 | MultipleMeltPeaks |
| bacA-02                    | 39C | 37.81 | 83.65 | 1.63 | MultipleMeltPeaks |
| BETA-globin                | 39C | 23.36 | 83.98 | 1.99 |                   |
| bla-ACC-1                  | 39C | 35.7  | 83.19 | 1.81 |                   |
| bla-L1                     | 39C | 32.23 | 85.19 | 2.01 |                   |
| bla1                       | 39C |       |       |      | NoAmplification   |
| blaCMY                     | 39C | 30.32 | 80.03 | 1.93 |                   |
| blaCMY2-01                 | 39C | 31.09 | 75.33 | 2.08 |                   |
| blaCMY2-02                 | 39C | 30.61 | 85.32 | 2    | MultipleMeltPeaks |
| blaCTX-M-01                | 39C | 33.46 | 84.87 | 2.03 |                   |
| blaCTX-M-02                | 39C | 39.23 | 89.65 | 1.61 | MultipleMeltPeaks |
| blaCTX-M-03                | 39C | 40.71 | 63.37 | 1.64 | MultipleMeltPeaks |
| blaCTX-M-04                | 39C | 31.14 | 90.22 | 2.02 |                   |
| blaCTX-M-05                | 39C | 36.87 | 75.52 | 1.7  |                   |
| blaCTX-M-06                | 39C |       |       |      | NoAmplification   |
| blaGES                     | 39C |       |       |      | NoAmplification   |
| blaIMP-01                  | 39C |       |       |      | NoAmplification   |
| blaIMP-02                  | 39C |       |       |      | CurveFitFailed    |
| blaMOX/blaC                | 39C |       |       |      | NoAmplification   |
| blaOCH                     | 39C |       |       |      | NoAmplification   |
| blaOKP                     | 39C |       |       |      | NoAmplification   |
| blaOXA1/blaC               | 39C |       |       |      | NoAmplification   |
| blaOXA10-01                | 39C |       |       |      | NoAmplification   |
| blaOXA10-02                | 39C |       |       |      | NoAmplification   |
| blaOXY                     | 39C | 35.91 | 89.84 | 1.61 |                   |
| blaPAO                     | 39C |       |       |      | NoAmplification   |
| blaPER                     | 39C |       |       |      | NoAmplification   |
| blaPSE                     | 39C |       |       |      | NoAmplification   |
| blaROB                     | 39C | 36.78 | 87.5  | 1.8  |                   |
| blaSFO                     | 39C | 34.63 | 90.04 | 1.87 | MultipleMeltPeaks |
| blaSHV-01                  | 39C |       |       |      | NoAmplification   |
| blaSHV-02                  | 39C |       |       |      | NoAmplification   |
| blaTEM                     | 39C |       |       |      | NoAmplification   |
| blaTLA                     | 39C |       |       |      | NoAmplification   |
| blaVEB                     | 39C |       |       |      | NoAmplification   |
| blaVIM                     | 39C |       |       |      | NoAmplification   |
| blaZ                       | 39C |       |       |      | NoAmplification   |
| carB                       | 39C |       |       |      | NoAmplification   |
| catA1                      | 39C |       |       |      | NoAmplification   |
| catB3                      | 39C |       |       |      | NoAmplification   |
| catB8                      | 39C | 31.36 | 82.02 | 1.98 |                   |

|            |     |       |       |      |                              |
|------------|-----|-------|-------|------|------------------------------|
| ceoA       | 39C | 28.22 | 82    | 1.98 | MultipleMeltPeaks            |
| cepA       | 39C |       |       |      | NoAmplification              |
| cfiA       | 39C | 33.19 | 81.22 | 1.85 | MultipleMeltPeaks            |
| cfr        | 39C |       |       |      | NoAmplification              |
| cfxA       | 39C | 20.33 | 77.54 | 1.98 |                              |
| cmeA       | 39C |       |       |      | CurveFitFailed               |
| cmlA1-01   | 39C | 31.43 | 89.5  | 1.94 |                              |
| cmlA1-02   | 39C | 31.93 | 90.16 | 1.95 |                              |
| cmr        | 39C | 38.01 | 61.8  | 1.75 | MultipleMeltPeaks            |
| cmx(A)     | 39C | 34.39 | 75.26 | 1.94 |                              |
| cphA-01    | 39C | 34.18 | 85.11 | 1.96 |                              |
| cphA-02    | 39C | 33.28 | 82.33 | 1.93 |                              |
| dfrA1      | 39C | 39.06 | 79.65 | 1.82 |                              |
| dfrA12     | 39C | 36.47 | 85.86 | 1.56 |                              |
| emrD       | 39C |       |       |      | CurveFitFailed               |
| ereA       | 39C | 39.27 | 83.29 | 1.8  |                              |
| ereB       | 39C | 34.79 | 89.27 | 1.98 | MultipleMeltPeaks            |
| erm(34)    | 39C | 36.1  | 90.38 | 1.84 |                              |
| erm(35)    | 39C |       |       |      | NoAmplification              |
| erm(36)    | 39C | 36.48 | 81.05 | 1.83 |                              |
| ermA       | 39C |       |       |      | NoAmplification              |
| ermA/ermTR | 39C |       |       |      | NoAmplification              |
| ermB       | 39C | 21    | 75.01 | 2.1  |                              |
| ermC       | 39C |       |       |      | NoAmplification              |
| ermF       | 39C |       |       |      | NoAmplification              |
| ermJ/ermD  | 39C |       |       |      | NoAmplification              |
| ermK-01    | 39C |       |       |      | NoAmplification              |
| ermK-02    | 39C | 38.27 | 84.33 | 1.72 | MultipleMeltPeaks            |
| ermT-01    | 39C |       |       |      | NoAmplification              |
| ermT-02    | 39C |       |       |      | CurveFitFailed               |
| ermX       | 39C | 42.07 | 64.79 | 1.54 | MultipleMeltPeaks            |
| ermY       | 39C |       |       |      | NoAmplification              |
| fabK       | 39C | 24.18 | 79.46 | 2.1  |                              |
| floR       | 39C | 36.33 | 89.69 | 1.7  | MultipleMeltPeaks            |
| folA       | 39C |       |       |      | NoAmplification              |
| fosB       | 39C |       |       |      | LowEfficiency, CtIsSmall, S: |
| fosX       | 39C |       |       |      | NoAmplification              |
| fox5       | 39C | 29.79 | 86.84 | 1.99 | MultipleMeltPeaks            |
| imiR       | 39C |       |       |      | CurveFitFailed               |
| ImrA-01    | 39C |       |       |      | NoAmplification              |
| intl       | 39C | 29.24 | 90.21 | 1.97 |                              |
| intl1      | 39C | 21.05 | 87.69 | 1.94 |                              |
| IS613      | 39C | 36.99 | 82.85 | 1.82 |                              |
| lnuA-01    | 39C |       |       |      | NoAmplification              |
| lnuB-01    | 39C |       |       |      | NoAmplification              |
| lnuB-02    | 39C |       |       |      | NoAmplification              |

|                |     |       |       |      |                   |
|----------------|-----|-------|-------|------|-------------------|
| lnuC           | 39C | 36.38 | 84.26 | 1.66 | MultipleMeltPeaks |
| marR-01        | 39C | 35.66 | 85.49 | 1.79 | MultipleMeltPeaks |
| matA/mel       | 39C | 17.17 | 77.68 | 2.08 |                   |
| mdet1          | 39C |       |       |      | NoAmplification   |
| mdtA           | 39C | 33.34 | 82.29 | 1.95 |                   |
| mdtE/yhiU      | 39C | 28.64 | 87.32 | 1.94 |                   |
| mecA           | 39C |       |       |      | NoAmplification   |
| mefA           | 39C | 16.13 | 80.49 | 2.01 |                   |
| mepA           | 39C | 31.54 | 87.69 | 1.99 |                   |
| mexA           | 39C | 36.41 | 89.45 | 1.8  |                   |
| mexD           | 39C |       |       |      | CurveFitFailed    |
| mexE           | 39C |       |       |      | CurveFitFailed    |
| mexF           | 39C | 29.01 | 87.45 | 1.75 | MultipleMeltPeaks |
| mphA-01        | 39C | 29.76 | 86.51 | 1.96 |                   |
| mphA-02        | 39C | 31.86 | 78.44 | 1.67 | MultipleMeltPeaks |
| mphB           | 39C |       |       |      | NoAmplification   |
| mphC           | 39C |       |       |      | NoAmplification   |
| msrA-01        | 39C |       |       |      | NoAmplification   |
| msrC-01        | 39C |       |       |      | NoAmplification   |
| mtrC-01        | 39C | 39.68 | 83.48 | 1.72 | MultipleMeltPeaks |
| mtrC-02        | 39C | 36.47 | 84.32 | 1.91 |                   |
| mtrD-02        | 39C | 29.25 | 80.92 | 1.68 | MultipleMeltPeaks |
| mtrD-03        | 39C | 28.21 | 82.12 | 1.92 |                   |
| NDM1           | 39C |       |       |      | NoAmplification   |
| nimE           | 39C | 41.66 | 61.92 | 1.69 | MultipleMeltPeaks |
| nisB           | 39C |       |       |      | NoAmplification   |
| oleC           | 39C | 33.51 | 89.34 | 1.94 |                   |
| oprD           | 39C | 27.7  | 91.95 | 1.94 |                   |
| oprJ           | 39C | 32.33 | 87.63 | 1.74 | MultipleMeltPeaks |
| pbp            | 39C |       |       |      | NoAmplification   |
| pbp2x          | 39C |       |       |      | NoAmplification   |
| Pbp5           | 39C |       |       |      | NoAmplification   |
| penA           | 39C |       |       |      | NoAmplification   |
| pikR1          | 39C | 35.41 | 83.92 | 1.95 | MultipleMeltPeaks |
| pikR2          | 39C | 28.97 | 84.7  | 2.06 | MultipleMeltPeaks |
| pmrA           | 39C | 20.44 | 79.59 | 2.08 |                   |
| pncA           | 39C | 29.72 | 88.73 | 1.93 |                   |
| putative multi | 39C | 38.95 | 77.3  | 1.83 | MultipleMeltPeaks |
| qac            | 39C | 37.7  | 85.03 | 1.82 |                   |
| qacA           | 39C |       |       |      | NoAmplification   |
| qacA/qacB      | 39C |       |       |      | NoAmplification   |
| qacEdelta1-0   | 39C |       |       |      | NoAmplification   |
| qacEdelta1-0   | 39C | 31.98 | 80.81 | 1.97 |                   |
| qacH-01        | 39C | 35.23 | 83.2  | 1.9  |                   |
| qacH-02        | 39C | 38.43 | 84.07 | 1.67 | MultipleMeltPeaks |
| qnrA           | 39C |       |       |      | NoAmplification   |

|              |     |       |       |      |                   |
|--------------|-----|-------|-------|------|-------------------|
| rarD-02      | 39C |       |       |      | NoAmplification   |
| sat4         | 39C |       |       |      | NoAmplification   |
| sdeB         | 39C |       |       |      | NoAmplification   |
| spcN-01      | 39C |       |       |      | NoAmplification   |
| speA         | 39C |       |       |      | NoAmplification   |
| str          | 39C |       |       |      | NoAmplification   |
| strA         | 39C |       |       |      | NoAmplification   |
| strB         | 39C |       |       |      | CurveFitFailed    |
| sul1         | 39C |       |       |      | NoAmplification   |
| sul2         | 39C |       |       |      | CurveFitFailed    |
| sulA/foIP-01 | 39C | 17.83 | 81.09 | 2.03 |                   |
| sulA/foIP-03 | 39C | 18.54 | 83.14 | 2    |                   |
| tet(32)      | 39C |       |       |      | NoAmplification   |
| tet(34)      | 39C | 30.02 | 75.8  | 2.02 |                   |
| tet(35)      | 39C |       |       |      | NoAmplification   |
| tet(36)-A    | 39C | 38.21 | 84.27 | 1.73 |                   |
| tet(36)-B    | 39C |       |       |      | NoAmplification   |
| tet(37)      | 39C | 35.13 | 89.66 | 1.85 |                   |
| tetA-01      | 39C | 31.12 | 85.09 | 1.97 |                   |
| tetA-02      | 39C | 34.41 | 89.85 | 1.77 | MultipleMeltPeaks |
| tetB-01      | 39C |       |       |      | CurveFitFailed    |
| tetB-02      | 39C |       |       |      | CurveFitFailed    |
| tetC-01      | 39C |       |       |      | NoAmplification   |
| tetC-02      | 39C |       |       |      | NoAmplification   |
| tetD-01      | 39C |       |       |      | NoAmplification   |
| tetD-02      | 39C | 32.05 | 85.19 | 1.98 |                   |
| tetE         | 39C |       |       |      | NoAmplification   |
| tetG-01      | 39C | 33.18 | 86.82 | 1.95 |                   |
| tetG-02      | 39C | 30.52 | 79.55 | 1.89 |                   |
| tetH         | 39C |       |       |      | NoAmplification   |
| tetJ         | 39C |       |       |      | NoAmplification   |
| tetK         | 39C |       |       |      | NoAmplification   |
| tetL-01      | 39C |       |       |      | NoAmplification   |
| tetL-02      | 39C | 39.9  | 85.39 | 1.51 |                   |
| tetM-01      | 39C | 21.28 | 76.23 | 2.02 |                   |
| tetM-02      | 39C | 21.55 | 77.63 | 2.05 |                   |
| tetO-01      | 39C |       |       |      | NoAmplification   |
| tetPA        | 39C |       |       |      | NoAmplification   |
| tetPB-01     | 39C | 38.57 | 87.43 | 1.83 | MultipleMeltPeaks |
| tetPB-02     | 39C | 32.24 | 84.96 | 2.06 |                   |
| tetPB-03     | 39C |       |       |      | NoAmplification   |
| tetPB-05     | 39C |       |       |      | NoAmplification   |
| tetQ         | 39C | 35.08 | 73.33 | 2.04 |                   |
| tetR-02      | 39C | 29.78 | 88.46 | 1.93 |                   |
| tetR-03      | 39C |       |       |      | NoAmplification   |
| tetS         | 39C | 34.89 | 86.96 | 2.06 | MultipleMeltPeaks |

|             |     |       |       |      |                   |
|-------------|-----|-------|-------|------|-------------------|
| tetT        | 39C |       |       |      | NoAmplification   |
| tetU-01     | 39C | 35.76 | 82.04 | 1.84 |                   |
| tetV        | 39C |       |       |      | NoAmplification   |
| tetW-01     | 39C |       |       |      | NoAmplification   |
| tetX        | 39C |       |       |      | NoAmplification   |
| tnpA-01     | 39C |       |       |      | NoAmplification   |
| tnpA-02     | 39C | 39.67 | 64.79 | 1.66 | MultipleMeltPeaks |
| tnpA-03     | 39C | 32.9  | 77.58 | 1.99 |                   |
| tnpA-04     | 39C |       |       |      | CurveFitFailed    |
| tnpA-05     | 39C | 40.9  | 78.05 | 1.75 |                   |
| tnpA-07     | 39C |       |       |      | NoAmplification   |
| tolC-01     | 39C |       |       |      | NoAmplification   |
| tolC-02     | 39C | 30.81 | 85.33 | 1.93 |                   |
| tolC-03     | 39C | 30.32 | 84.29 | 1.93 |                   |
| Tp614       | 39C |       |       |      | NoAmplification   |
| ttgA        | 39C | 36.32 | 86.02 | 1.82 | MultipleMeltPeaks |
| ttgB        | 39C | 32.11 | 79.26 | 2.02 |                   |
| vanA        | 39C |       |       |      | NoAmplification   |
| vanB-01     | 39C | 37.47 | 81.7  | 1.7  | MultipleMeltPeaks |
| vanC-01     | 39C | 37.85 | 82.07 | 1.82 |                   |
| vanC-02     | 39C |       |       |      | NoAmplification   |
| vanC-03     | 39C | 27.61 | 91.17 | 1.96 |                   |
| vanC1       | 39C |       |       |      | NoAmplification   |
| vanC2/vanC3 | 39C | 33.65 | 81.08 | 2.05 |                   |
| vanG        | 39C |       |       |      | NoAmplification   |
| vanHB       | 39C | 35.16 | 85.76 | 1.84 | MultipleMeltPeaks |
| vanHD       | 39C |       |       |      | CurveFitFailed    |
| vanRA-01    | 39C |       |       |      | NoAmplification   |
| vanRA-02    | 39C |       |       |      | NoAmplification   |
| vanRB       | 39C | 36.48 | 88.82 | 1.78 |                   |
| vanRC       | 39C |       |       |      | NoAmplification   |
| vanRC4      | 39C |       |       |      | NoAmplification   |
| vanRD       | 39C |       |       |      | NoAmplification   |
| vanSA       | 39C |       |       |      | NoAmplification   |
| vanSB       | 39C | 28.81 | 74.29 | 2.01 |                   |
| vanSC-01    | 39C | 30.3  | 83.96 | 1.98 | MultipleMeltPeaks |
| vanSC-02    | 39C |       |       |      | NoAmplification   |
| vanTC-01    | 39C |       |       |      | NoAmplification   |
| vanTC-02    | 39C | 37.93 | 86.36 | 1.63 |                   |
| vanTE       | 39C |       |       |      | NoAmplification   |
| vanTG       | 39C |       |       |      | NoAmplification   |
| vanWB       | 39C |       |       |      | NoAmplification   |
| vanWG       | 39C | 33.74 | 74.57 | 1.99 |                   |
| vanXA       | 39C |       |       |      | CurveFitFailed    |
| vanXB       | 39C |       |       |      | NoAmplification   |
| vanXD       | 39C | 30.29 | 75.56 | 2.05 |                   |

|              |     |       |       |                        |
|--------------|-----|-------|-------|------------------------|
| vanYB        | 39C | 37.94 | 83.38 | 1.78                   |
| vanYD-01     | 39C | 30.38 | 89.11 | 1.85                   |
| vanYD-02     | 39C |       |       | NoAmplification        |
| vatB-01      | 39C |       |       | NoAmplification        |
| vatB-02      | 39C |       |       | CurveFitFailed         |
| vatC-01      | 39C | 41.56 | 72.59 | 1.77                   |
| vatC-02      | 39C | 38.24 | 83.22 | 1.76 MultipleMeltPeaks |
| vatE-01      | 39C | 29.16 | 76.55 | 2.12                   |
| vatE-02      | 39C | 38.3  | 74.94 | 2.13                   |
| vgaA-01      | 39C |       |       | NoAmplification        |
| vgaA-02      | 39C | 38.94 | 87.22 | 1.73 MultipleMeltPeaks |
| vgb-01       | 39C |       |       | CurveFitFailed         |
| vgbB-01      | 39C |       |       | NoAmplification        |
| vgbB-02      | 39C |       |       | NoAmplification        |
| yceE/mdtG-0  | 39C |       |       | NoAmplification        |
| yceE/mdtG-0  | 39C |       |       | NoAmplification        |
| yceL/mdtH-0  | 39C | 28.93 | 87.95 | 1.96                   |
| yceL/mdtH-0  | 39C |       |       | NoAmplification        |
| yceL/mdtH-0  | 39C | 34.97 | 87.56 | 1.76                   |
| yidY/mdtL-01 | 39C | 29.43 | 82.83 | 1.97                   |
| yidY/mdtL-02 | 39C |       |       | CurveFitFailed         |































| Assay          | Sample | Ct | Tm    | Efficiency | flag                         |
|----------------|--------|----|-------|------------|------------------------------|
| 16S rRNA       | 40A    |    | 14.44 | 81.89      | 2.01                         |
| aac            | 40A    |    | 36.01 | 86.27      | 1.75 MultipleMeltPeaks       |
| aac(6')-Ib(akz | 40A    |    |       |            | LowEfficiency, CtIsSmall, S: |
| aac(6')-Ib(akz | 40A    |    | 33.6  | 82.68      | 1.99 MultipleMeltPeaks       |
| aac(6')-Ib(akz | 40A    |    |       |            | LowEfficiency, CtIsSmall, S: |
| aac(6')-II     | 40A    |    |       |            | LowEfficiency, CtIsSmall, S: |
| aac(6')I1      | 40A    |    |       |            | NoAmplification              |
| aacA/aphD      | 40A    |    |       |            | LowEfficiency, CtIsSmall, S: |
| aacC           | 40A    |    | 39.52 | 75.6       | 1.67 MultipleMeltPeaks       |
| aacC1          | 40A    |    |       |            | NoAmplification              |
| aacC2          | 40A    |    |       |            | NoAmplification              |
| aacC4          | 40A    |    | 31.57 | 89.27      | 1.89                         |
| aadA-01        | 40A    |    |       |            | LowEfficiency, CtIsSmall, S: |
| aadA-02        | 40A    |    | 34.6  | 80.41      | 1.91                         |
| aadA-1-01      | 40A    |    | 36.99 | 81.95      | 1.85                         |
| aadA-1-02      | 40A    |    |       |            | LowEfficiency, CtIsSmall, S: |
| aadA1          | 40A    |    | 38.12 | 81.82      | 1.93                         |
| aadA2-01       | 40A    |    |       |            | NoAmplification              |
| aadA2-02       | 40A    |    |       |            | NoAmplification              |
| aadA2-03       | 40A    |    |       |            | LowEfficiency, CtIsSmall, S: |
| aadA5-01       | 40A    |    |       |            | LowEfficiency, CtIsSmall, C: |
| aadA5-02       | 40A    |    |       |            | CurveFitFailed               |
| aadA9-01       | 40A    |    |       |            | LowEfficiency, CtIsSmall, C: |
| aadA9-02       | 40A    |    | 35.38 | 83.42      | 1.93                         |
| aadD           | 40A    |    |       |            | LowEfficiency, CtIsSmall, S: |
| aadE           | 40A    |    |       |            | NoAmplification              |
| acrA-01        | 40A    |    | 27.77 | 82.93      | 1.96                         |
| acrA-02        | 40A    |    | 34.76 | 79.71      | 1.9                          |
| acrA-03        | 40A    |    | 32.43 | 79.34      | 1.92                         |
| acrA-04        | 40A    |    | 34.28 | 80.34      | 2                            |
| acrA-05        | 40A    |    | 30.22 | 92.37      | 1.94                         |
| acrB-01        | 40A    |    | 35.32 | 87.77      | 1.89                         |
| acrF           | 40A    |    | 29.99 | 83.22      | 1.92                         |
| acrR-01        | 40A    |    |       |            | NoAmplification              |
| acrR-02        | 40A    |    |       |            | CurveFitFailed               |
| Actin          | 40A    |    | 21.61 | 87         | 1.94                         |
| adeA           | 40A    |    |       |            | NoAmplification              |
| ampC-01        | 40A    |    | 33.02 | 80.11      | 1.96                         |
| ampC-02        | 40A    |    |       |            | LowEfficiency, CtIsSmall, S: |
| ampC-04        | 40A    |    | 32.63 | 82.39      | 1.85                         |
| ampC-05        | 40A    |    |       |            | NoAmplification              |
| ampC-06        | 40A    |    |       |            | LowEfficiency, CtIsSmall, S: |
| ampC-07        | 40A    |    |       |            | CurveFitFailed               |
| ampC-09        | 40A    |    |       |            | CurveFitFailed               |
| ampC/blaDH     | 40A    |    | 34.42 | 85.56      | 1.92                         |

|                            |     |       |       |      |                                          |
|----------------------------|-----|-------|-------|------|------------------------------------------|
| aph                        | 40A |       |       |      | CurveFitFailed                           |
| aph(2')-Id-01              | 40A |       |       |      | CurveFitFailed                           |
| aph(2')-Id-02              | 40A |       |       |      | CurveFitFailed                           |
| aph6ia                     | 40A | 29.21 | 78.18 | 2.01 |                                          |
| aphA1(aka k <sub>z</sub> ) | 40A | 29.26 | 76.23 | 2.08 |                                          |
| bacA-01                    | 40A |       |       |      | NoAmplification                          |
| bacA-02                    | 40A | 37.09 | 84.7  | 1.69 |                                          |
| BETA-globin                | 40A | 23.07 | 84.15 | 2.01 |                                          |
| bla-ACC-1                  | 40A | 37.9  | 80.28 | 1.81 | MultipleMeltPeaks                        |
| bla-L1                     | 40A | 31.56 | 85.29 | 1.93 |                                          |
| bla1                       | 40A |       |       |      | LowEfficiency, CtIsSmall, S <sub>e</sub> |
| blaCMY                     | 40A | 36.33 | 80.35 | 1.89 |                                          |
| blaCMY2-01                 | 40A | 29.35 | 82.71 | 1.93 |                                          |
| blaCMY2-02                 | 40A | 29.53 | 85.5  | 1.97 |                                          |
| blaCTX-M-01                | 40A |       |       |      | NoAmplification                          |
| blaCTX-M-02                | 40A |       |       |      | LowEfficiency, CtIsSmall, S <sub>e</sub> |
| blaCTX-M-03                | 40A |       |       |      | LowEfficiency, CtIsSmall, S <sub>e</sub> |
| blaCTX-M-04                | 40A | 35.73 | 88.14 | 1.94 |                                          |
| blaCTX-M-05                | 40A | 37.67 | 75.59 | 1.69 |                                          |
| blaCTX-M-06                | 40A |       |       |      | NoAmplification                          |
| blaGES                     | 40A |       |       |      | LowEfficiency, CtIsSmall, S <sub>e</sub> |
| blaIMP-01                  | 40A |       |       |      | NoAmplification                          |
| blaIMP-02                  | 40A |       |       |      | LowEfficiency, CtIsSmall, S <sub>e</sub> |
| blaMOX/blaC                | 40A |       |       |      | NoAmplification                          |
| blaOCH                     | 40A |       |       |      | NoAmplification                          |
| blaOKP                     | 40A |       |       |      | NoAmplification                          |
| blaOXA1/blaC               | 40A |       |       |      | LowEfficiency, CtIsSmall, S <sub>e</sub> |
| blaOXA10-01                | 40A | 30.24 | 76.19 | 1.77 |                                          |
| blaOXA10-02                | 40A | 30.75 | 76.28 | 1.92 |                                          |
| blaOXY                     | 40A |       |       |      | CurveFitFailed                           |
| blaPAO                     | 40A |       |       |      | NoAmplification                          |
| blaPER                     | 40A |       |       |      | LowEfficiency, CtIsSmall, S <sub>e</sub> |
| blaPSE                     | 40A |       |       |      | NoAmplification                          |
| blaROB                     | 40A |       |       |      | NoAmplification                          |
| blaSFO                     | 40A | 35.02 | 80.45 | 1.9  |                                          |
| blaSHV-01                  | 40A |       |       |      | LowEfficiency, CtIsSmall, S <sub>e</sub> |
| blaSHV-02                  | 40A |       |       |      | LowEfficiency, CtIsSmall, S <sub>e</sub> |
| blaTEM                     | 40A | 17.67 | 79.16 | 1.76 |                                          |
| blaTLA                     | 40A |       |       |      | LowEfficiency, CtIsSmall, S <sub>e</sub> |
| blaVEB                     | 40A |       |       |      | NoAmplification                          |
| blaVIM                     | 40A |       |       |      | NoAmplification                          |
| blaZ                       | 40A | 25.77 | 73.73 | 2.04 |                                          |
| carB                       | 40A |       |       |      | NoAmplification                          |
| catA1                      | 40A |       |       |      | NoAmplification                          |
| catB3                      | 40A | 36.69 | 80.05 | 1.84 | MultipleMeltPeaks                        |
| catB8                      | 40A | 39.5  | 79.86 | 1.74 |                                          |

|            |     |       |       |      |                              |
|------------|-----|-------|-------|------|------------------------------|
| ceoA       | 40A | 30.14 | 82.27 | 1.94 | MultipleMeltPeaks            |
| cepA       | 40A |       |       |      | CurveFitFailed               |
| cfiA       | 40A |       |       |      | NoAmplification              |
| cfr        | 40A |       |       |      | LowEfficiency, CtIsSmall, S: |
| cfxA       | 40A | 20.03 | 77.54 | 1.95 |                              |
| cmeA       | 40A |       |       |      | LowEfficiency, CtIsSmall, S: |
| cmlA1-01   | 40A | 37.69 | 88.31 | 1.76 |                              |
| cmlA1-02   | 40A | 31.49 | 83.27 | 2    |                              |
| cmr        | 40A |       |       |      | LowEfficiency, CtIsSmall, S: |
| cmx(A)     | 40A | 33.52 | 83.7  | 1.9  | MultipleMeltPeaks            |
| cphA-01    | 40A | 34.44 | 85.5  | 1.92 | MultipleMeltPeaks            |
| cphA-02    | 40A | 40.93 | 76.52 | 1.77 |                              |
| dfrA1      | 40A |       |       |      | NoAmplification              |
| dfrA12     | 40A | 38.74 | 76.78 | 1.85 |                              |
| emrD       | 40A | 35.59 | 90.93 | 1.8  |                              |
| ereA       | 40A |       |       |      | LowEfficiency, CtIsSmall, S: |
| ereB       | 40A |       |       |      | CurveFitFailed               |
| erm(34)    | 40A |       |       |      | NoAmplification              |
| erm(35)    | 40A |       |       |      | CurveFitFailed               |
| erm(36)    | 40A |       |       |      | NoAmplification              |
| ermA       | 40A |       |       |      | LowEfficiency, CtIsSmall, S: |
| ermA/ermTR | 40A |       |       |      | NoAmplification              |
| ermB       | 40A | 19.12 | 75.14 | 2.13 |                              |
| ermC       | 40A | 28.41 | 75.53 | 1.94 |                              |
| ermF       | 40A |       |       |      | LowEfficiency, CtIsSmall, S: |
| ermJ/ermD  | 40A |       |       |      | LowEfficiency, CtIsSmall, S: |
| ermK-01    | 40A |       |       |      | LowEfficiency, CtIsSmall, S: |
| ermK-02    | 40A | 38.35 | 64.16 | 1.81 | MultipleMeltPeaks            |
| ermT-01    | 40A |       |       |      | LowEfficiency, CtIsSmall, S: |
| ermT-02    | 40A | 38.5  | 70.6  | 1.8  |                              |
| ermX       | 40A | 27.72 | 83.67 | 1.88 |                              |
| ermY       | 40A |       |       |      | LowEfficiency, CtIsSmall, S: |
| fabK       | 40A | 19.72 | 77.56 | 2.05 |                              |
| floR       | 40A |       |       |      | NoAmplification              |
| folA       | 40A |       |       |      | NoAmplification              |
| fosB       | 40A |       |       |      | LowEfficiency, CtIsSmall, S: |
| fosX       | 40A |       |       |      | CurveFitFailed               |
| fox5       | 40A | 30.79 | 86.39 | 1.89 |                              |
| imiR       | 40A |       |       |      | CurveFitFailed               |
| ImrA-01    | 40A |       |       |      | NoAmplification              |
| intl       | 40A | 34.93 | 84.78 | 1.92 |                              |
| intl1      | 40A | 22.88 | 86.72 | 2.02 | MultipleMeltPeaks            |
| IS613      | 40A | 21.1  | 79.71 | 2.1  |                              |
| lnuA-01    | 40A |       |       |      | LowEfficiency, CtIsSmall, S: |
| lnuB-01    | 40A |       |       |      | CurveFitFailed               |
| lnuB-02    | 40A |       |       |      | LowEfficiency, CtIsSmall, S: |

|                |     |       |       |      |                             |
|----------------|-----|-------|-------|------|-----------------------------|
| lnuC           | 40A |       |       |      | CurveFitFailed              |
| marR-01        | 40A | 35.11 | 90.78 | 1.85 |                             |
| matA/mel       | 40A | 17.83 | 77.68 | 2.06 |                             |
| mdet1          | 40A |       |       |      | LowEfficiency, CtIsSmall, C |
| mdtA           | 40A |       |       |      | CurveFitFailed              |
| mdtE/yhiU      | 40A | 36.67 | 76.39 | 1.99 |                             |
| mecA           | 40A |       |       |      | LowEfficiency, CtIsSmall, S |
| mefA           | 40A | 17.24 | 80.71 | 2.02 |                             |
| mepA           | 40A |       |       |      | CurveFitFailed              |
| mexA           | 40A |       |       |      | CurveFitFailed              |
| mexD           | 40A |       |       |      | CurveFitFailed              |
| mexE           | 40A |       |       |      | NoAmplification             |
| mexF           | 40A | 29.76 | 81.53 | 1.81 | MultipleMeltPeaks           |
| mphA-01        | 40A | 30.92 | 89.09 | 2    |                             |
| mphA-02        | 40A | 34.17 | 76.71 | 1.98 |                             |
| mphB           | 40A |       |       |      | CurveFitFailed              |
| mphC           | 40A |       |       |      | CurveFitFailed              |
| msrA-01        | 40A |       |       |      | CurveFitFailed              |
| msrC-01        | 40A |       |       |      | NoAmplification             |
| mtrC-01        | 40A |       |       |      | NoAmplification             |
| mtrC-02        | 40A |       |       |      | NoAmplification             |
| mtrD-02        | 40A | 28.83 | 81.55 | 1.97 |                             |
| mtrD-03        | 40A |       |       |      | NoAmplification             |
| NDM1           | 40A |       |       |      | CurveFitFailed              |
| nimE           | 40A | 37.73 | 74.45 | 2.05 |                             |
| nisB           | 40A |       |       |      | NoAmplification             |
| oleC           | 40A | 32.27 | 88.83 | 1.92 |                             |
| oprD           | 40A | 30.64 | 86.81 | 1.99 |                             |
| oprJ           | 40A | 34.67 | 88.96 | 1.95 |                             |
| pbp            | 40A |       |       |      | LowEfficiency, CtIsSmall, S |
| pbp2x          | 40A | 19.63 | 75.81 | 1.89 |                             |
| Pbp5           | 40A |       |       |      | LowEfficiency, CtIsSmall, S |
| penA           | 40A |       |       |      | NoAmplification             |
| pikR1          | 40A |       |       |      | NoAmplification             |
| pikR2          | 40A | 32.76 | 90.46 | 2    |                             |
| pmrA           | 40A | 19.74 | 79.56 | 2.1  |                             |
| pncA           | 40A | 28.99 | 89.08 | 1.93 |                             |
| putative multi | 40A |       |       |      | LowEfficiency, CtIsSmall, S |
| qac            | 40A |       |       |      | LowEfficiency, CtIsSmall, S |
| qacA           | 40A | 37.14 | 87.59 | 1.9  | MultipleMeltPeaks           |
| qacA/qacB      | 40A |       |       |      | NoAmplification             |
| qacEdelta1-0   | 40A |       |       |      | CurveFitFailed              |
| qacEdelta1-0   | 40A | 29.14 | 78.59 | 1.98 |                             |
| qacH-01        | 40A |       |       |      | LowEfficiency, CtIsSmall, S |
| qacH-02        | 40A | 38.14 | 78.68 | 1.82 |                             |
| qnrA           | 40A |       |       |      | LowEfficiency, CtIsSmall, S |



|              |     |       |       |      |                              |
|--------------|-----|-------|-------|------|------------------------------|
| rarD-02      | 40A | 30.86 | 85.88 | 1.99 |                              |
| sat4         | 40A |       |       |      | LowEfficiency, CtIsSmall, S: |
| sdeB         | 40A |       |       |      | LowEfficiency, CtIsSmall, S: |
| spcN-01      | 40A |       |       |      | LowEfficiency, CtIsSmall, S: |
| speA         | 40A |       |       |      | NoAmplification              |
| str          | 40A |       |       |      | LowEfficiency, CtIsSmall, S: |
| strA         | 40A |       |       |      | LowEfficiency, CtIsSmall, S: |
| strB         | 40A | 28.39 | 83.86 | 1.94 |                              |
| sul1         | 40A |       |       |      | NoAmplification              |
| sul2         | 40A |       |       |      | CurveFitFailed               |
| sulA/foIP-01 | 40A | 19.37 | 80.79 | 2.02 |                              |
| sulA/foIP-03 | 40A | 18.82 | 83.31 | 2.02 |                              |
| tet(32)      | 40A | 25.44 | 81.23 | 1.98 |                              |
| tet(34)      | 40A | 38.16 | 73.76 | 1.91 |                              |
| tet(35)      | 40A |       |       |      | NoAmplification              |
| tet(36)-A    | 40A |       |       |      | CurveFitFailed               |
| tet(36)-B    | 40A |       |       |      | CurveFitFailed               |
| tet(37)      | 40A | 21.6  | 76.64 | 2.01 |                              |
| tetA-01      | 40A | 33.49 | 85.12 | 1.94 |                              |
| tetA-02      | 40A | 34.96 | 88.27 | 1.88 |                              |
| tetB-01      | 40A |       |       |      | NoAmplification              |
| tetB-02      | 40A |       |       |      | LowEfficiency, CtIsSmall, S: |
| tetC-01      | 40A |       |       |      | NoAmplification              |
| tetC-02      | 40A |       |       |      | CurveFitFailed               |
| tetD-01      | 40A |       |       |      | LowEfficiency, CtIsSmall, S: |
| tetD-02      | 40A |       |       |      | CurveFitFailed               |
| tetE         | 40A |       |       |      | NoAmplification              |
| tetG-01      | 40A |       |       |      | CurveFitFailed               |
| tetG-02      | 40A | 38.1  | 90    | 1.6  |                              |
| tetH         | 40A |       |       |      | NoAmplification              |
| tetJ         | 40A |       |       |      | LowEfficiency, CtIsSmall, S: |
| tetK         | 40A |       |       |      | LowEfficiency, CtIsSmall, S: |
| tetL-01      | 40A |       |       |      | CurveFitFailed               |
| tetL-02      | 40A | 38.29 | 85.63 | 1.63 |                              |
| tetM-01      | 40A | 19.5  | 76.29 | 2.01 |                              |
| tetM-02      | 40A | 19.54 | 77.66 | 2.04 |                              |
| tetO-01      | 40A |       |       |      | LowEfficiency, CtIsSmall, S: |
| tetPA        | 40A | 37.15 | 71.03 | 1.89 |                              |
| tetPB-01     | 40A |       |       |      | NoAmplification              |
| tetPB-02     | 40A | 30.55 | 88.04 | 1.94 |                              |
| tetPB-03     | 40A |       |       |      | LowEfficiency, CtIsSmall, S: |
| tetPB-05     | 40A |       |       |      | LowEfficiency, CtIsSmall, C: |
| tetQ         | 40A | 20.97 | 77.43 | 2.07 |                              |
| tetR-02      | 40A | 33.47 | 85.88 | 1.95 | MultipleMeltPeaks            |
| tetR-03      | 40A |       |       |      | CurveFitFailed               |
| tetS         | 40A | 32.31 | 85.64 | 1.65 |                              |

|             |     |       |       |      |                                          |
|-------------|-----|-------|-------|------|------------------------------------------|
| tetT        | 40A | 36.73 | 72.1  | 1.91 |                                          |
| tetU-01     | 40A |       |       |      | NoAmplification                          |
| tetV        | 40A |       |       |      | LowEfficiency, CtIsSmall, S <sub>e</sub> |
| tetW-01     | 40A | 24.39 | 81.64 | 2.04 |                                          |
| tetX        | 40A |       |       |      | LowEfficiency, CtIsSmall, S <sub>e</sub> |
| tnpA-01     | 40A |       |       |      | LowEfficiency, CtIsSmall, S <sub>e</sub> |
| tnpA-02     | 40A |       |       |      | NoAmplification                          |
| tnpA-03     | 40A | 26.42 | 77.31 | 1.99 |                                          |
| tnpA-04     | 40A | 39.27 | 64.76 | 1.66 | MultipleMeltPeaks                        |
| tnpA-05     | 40A | 29.3  | 80.74 | 1.91 |                                          |
| tnpA-07     | 40A |       |       |      | NoAmplification                          |
| tolC-01     | 40A |       |       |      | CurveFitFailed                           |
| tolC-02     | 40A | 29.97 | 80.51 | 1.93 |                                          |
| tolC-03     | 40A | 34.65 | 85.76 | 1.89 | MultipleMeltPeaks                        |
| Tp614       | 40A |       |       |      | LowEfficiency, CtIsSmall, S <sub>e</sub> |
| ttgA        | 40A | 30.9  | 84.1  | 1.91 |                                          |
| ttgB        | 40A |       |       |      | CurveFitFailed                           |
| vanA        | 40A |       |       |      | NoAmplification                          |
| vanB-01     | 40A | 35.09 | 89.92 | 1.83 |                                          |
| vanC-01     | 40A |       |       |      | LowEfficiency, CtIsSmall, C <sub>i</sub> |
| vanC-02     | 40A |       |       |      | LowEfficiency, CtIsSmall, S <sub>e</sub> |
| vanC-03     | 40A | 29.78 | 84.71 | 1.91 | MultipleMeltPeaks                        |
| vanC1       | 40A |       |       |      | LowEfficiency, CtIsSmall, C <sub>i</sub> |
| vanC2/vanC3 | 40A | 36.47 | 84.61 | 1.86 |                                          |
| vanG        | 40A |       |       |      | BadR2, CtIsSmall, Saturatio              |
| vanHB       | 40A |       |       |      | NoAmplification                          |
| vanHD       | 40A |       |       |      | BadR2, LowEfficiency, CtIsS              |
| vanRA-01    | 40A |       |       |      | LowEfficiency, CtIsSmall, S <sub>e</sub> |
| vanRA-02    | 40A |       |       |      | NoAmplification                          |
| vanRB       | 40A |       |       |      | NoAmplification                          |
| vanRC       | 40A |       |       |      | LowEfficiency, CtIsSmall, S <sub>e</sub> |
| vanRC4      | 40A |       |       |      | LowEfficiency, CtIsSmall, S <sub>e</sub> |
| vanRD       | 40A |       |       |      | NoAmplification                          |
| vanSA       | 40A |       |       |      | LowEfficiency, CtIsSmall, S <sub>e</sub> |
| vanSB       | 40A | 30.31 | 74.18 | 1.97 |                                          |
| vanSC-01    | 40A | 38.18 | 77.68 | 1.88 |                                          |
| vanSC-02    | 40A |       |       |      | NoAmplification                          |
| vanTC-01    | 40A |       |       |      | LowEfficiency, CtIsSmall, S <sub>e</sub> |
| vanTC-02    | 40A |       |       |      | NoAmplification                          |
| vanTE       | 40A |       |       |      | NoAmplification                          |
| vanTG       | 40A |       |       |      | NoAmplification                          |
| vanWB       | 40A |       |       |      | LowEfficiency, CtIsSmall, S <sub>e</sub> |
| vanWG       | 40A | 36.72 | 77.55 | 1.89 |                                          |
| vanXA       | 40A |       |       |      | NoAmplification                          |
| vanXB       | 40A |       |       |      | NoAmplification                          |
| vanXD       | 40A | 32.5  | 74.84 | 2.04 |                                          |

|              |     |       |       |      |                              |
|--------------|-----|-------|-------|------|------------------------------|
| vanYB        | 40A |       |       |      | LowEfficiency, CtIsSmall, S: |
| vanYD-01     | 40A | 36.61 | 79.93 | 1.74 | MultipleMeltPeaks            |
| vanYD-02     | 40A |       |       |      | NoAmplification              |
| vatB-01      | 40A |       |       |      | LowEfficiency, CtIsSmall, S: |
| vatB-02      | 40A |       |       |      | LowEfficiency, CtIsSmall, S: |
| vatC-01      | 40A |       |       |      | LowEfficiency, CtIsSmall, S: |
| vatC-02      | 40A |       |       |      | LowEfficiency, CtIsSmall, S: |
| vatE-01      | 40A | 32.04 | 75.98 | 2.07 |                              |
| vatE-02      | 40A |       |       |      | NoAmplification              |
| vgaA-01      | 40A |       |       |      | NoAmplification              |
| vgaA-02      | 40A |       |       |      | CurveFitFailed               |
| vgb-01       | 40A |       |       |      | LowEfficiency, CtIsSmall, S: |
| vgbB-01      | 40A |       |       |      | LowEfficiency, CtIsSmall, S: |
| vgbB-02      | 40A |       |       |      | LowEfficiency, CtIsSmall, S: |
| yceE/mdtG-0  | 40A |       |       |      | LowEfficiency, CtIsSmall, S: |
| yceE/mdtG-0  | 40A |       |       |      | NoAmplification              |
| yceL/mdtH-0  | 40A | 38.98 | 85.33 | 1.79 | MultipleMeltPeaks            |
| yceL/mdtH-0  | 40A |       |       |      | LowEfficiency, CtIsSmall, C: |
| yceL/mdtH-0  | 40A |       |       |      | CurveFitFailed               |
| yidY/mdtL-01 | 40A | 36.45 | 79.91 | 1.81 | MultipleMeltPeaks            |
| yidY/mdtL-02 | 40A | 33.98 | 75.55 | 1.98 |                              |































| Assay          | Sample | Ct | Tm    | Efficiency | flag                         |
|----------------|--------|----|-------|------------|------------------------------|
| 16S rRNA       | 40B    |    | 15.28 | 82.37      | 1.96                         |
| aac            | 40B    |    | 32.23 | 77.9       | 1.8 MultipleMeltPeaks        |
| aac(6')-Ib(akz | 40B    |    |       |            | LowEfficiency, CtIsSmall, S: |
| aac(6')-Ib(akz | 40B    |    | 32.06 | 81.91      | 2                            |
| aac(6')-Ib(akz | 40B    |    | 33.28 | 90.79      | 2                            |
| aac(6')-II     | 40B    |    |       |            | LowEfficiency, CtIsSmall, C: |
| aac(6')I1      | 40B    |    |       |            | CurveFitFailed               |
| aacA/aphD      | 40B    |    |       |            | LowEfficiency, CtIsSmall, S: |
| aacC           | 40B    |    | 32.96 | 86.25      | 1.93 MultipleMeltPeaks       |
| aacC1          | 40B    |    |       |            | LowEfficiency, CtIsSmall, S: |
| aacC2          | 40B    |    |       |            | LowEfficiency, CtIsSmall, C: |
| aacC4          | 40B    |    |       |            | NoAmplification              |
| aadA-01        | 40B    |    |       |            | LowEfficiency, CtIsSmall, S: |
| aadA-02        | 40B    |    |       |            | LowEfficiency, CtIsSmall, S: |
| aadA-1-01      | 40B    |    |       |            | NoAmplification              |
| aadA-1-02      | 40B    |    |       |            | LowEfficiency, CtIsSmall, S: |
| aadA1          | 40B    |    | 36.36 | 84.09      | 1.9                          |
| aadA2-01       | 40B    |    |       |            | LowEfficiency, CtIsSmall, S: |
| aadA2-02       | 40B    |    | 33.46 | 75.77      | 2.02                         |
| aadA2-03       | 40B    |    |       |            | LowEfficiency, CtIsSmall, S: |
| aadA5-01       | 40B    |    |       |            | CurveFitFailed               |
| aadA5-02       | 40B    |    | 36.12 | 83.52      | 1.88                         |
| aadA9-01       | 40B    |    |       |            | CurveFitFailed               |
| aadA9-02       | 40B    |    |       |            | LowEfficiency, CtIsSmall, S: |
| aadD           | 40B    |    |       |            | LowEfficiency, CtIsSmall, S: |
| aadE           | 40B    |    |       |            | LowEfficiency, CtIsSmall, S: |
| acrA-01        | 40B    |    | 30.28 | 82.82      | 1.92                         |
| acrA-02        | 40B    |    | 35.6  | 79.54      | 1.9 MultipleMeltPeaks        |
| acrA-03        | 40B    |    |       |            | CurveFitFailed               |
| acrA-04        | 40B    |    | 30.62 | 83.82      | 1.9                          |
| acrA-05        | 40B    |    | 31.33 | 88.74      | 2.02                         |
| acrB-01        | 40B    |    |       |            | LowEfficiency, CtIsSmall, S: |
| acrF           | 40B    |    | 34.75 | 78.81      | 1.9                          |
| acrR-01        | 40B    |    |       |            | LowEfficiency, CtIsSmall, S: |
| acrR-02        | 40B    |    |       |            | LowEfficiency, CtIsSmall, S: |
| Actin          | 40B    |    | 21.41 | 87.05      | 1.95                         |
| adeA           | 40B    |    |       |            | CurveFitFailed               |
| ampC-01        | 40B    |    | 32.69 | 85.58      | 1.86                         |
| ampC-02        | 40B    |    |       |            | LowEfficiency, CtIsSmall, S: |
| ampC-04        | 40B    |    | 32.66 | 78.62      | 1.84                         |
| ampC-05        | 40B    |    |       |            | LowEfficiency, CtIsSmall, S: |
| ampC-06        | 40B    |    |       |            | LowEfficiency, CtIsSmall, S: |
| ampC-07        | 40B    |    | 35.47 | 87.99      | 1.87                         |
| ampC-09        | 40B    |    |       |            | LowEfficiency, CtIsSmall, S: |
| ampC/blaDH     | 40B    |    |       |            | CurveFitFailed               |

|                          |     |       |       |      |                                          |
|--------------------------|-----|-------|-------|------|------------------------------------------|
| aph                      | 40B |       |       |      | LowEfficiency, CtIsSmall, S <sub>e</sub> |
| aph(2')-Id-01            | 40B |       |       |      | LowEfficiency, CtIsSmall, S <sub>e</sub> |
| aph(2')-Id-02            | 40B |       |       |      | LowEfficiency, CtIsSmall, S <sub>e</sub> |
| aph6ia                   | 40B | 28.69 | 78.25 | 1.97 |                                          |
| aphA1(aka k <sub>z</sub> | 40B |       |       |      | LowEfficiency, CtIsSmall, S <sub>e</sub> |
| bacA-01                  | 40B |       |       |      | CurveFitFailed                           |
| bacA-02                  | 40B |       |       |      | CurveFitFailed                           |
| BETA-globin              | 40B | 22.15 | 84.12 | 2.02 |                                          |
| bla-ACC-1                | 40B |       |       |      | LowEfficiency, CtIsSmall, S <sub>e</sub> |
| bla-L1                   | 40B | 31.12 | 84.36 | 1.98 |                                          |
| bla1                     | 40B |       |       |      | LowEfficiency, CtIsSmall, S <sub>e</sub> |
| blaCMY                   | 40B | 33.45 | 80.28 | 1.89 |                                          |
| blaCMY2-01               | 40B |       |       |      | LowEfficiency, CtIsSmall, S <sub>e</sub> |
| blaCMY2-02               | 40B | 30.69 | 85.39 | 1.95 | MultipleMeltPeaks                        |
| blaCTX-M-01              | 40B |       |       |      | LowEfficiency, CtIsSmall, S <sub>e</sub> |
| blaCTX-M-02              | 40B |       |       |      | CurveFitFailed                           |
| blaCTX-M-03              | 40B |       |       |      | LowEfficiency, CtIsSmall, S <sub>e</sub> |
| blaCTX-M-04              | 40B |       |       |      | CurveFitFailed                           |
| blaCTX-M-05              | 40B | 32.05 | 76.83 | 1.84 |                                          |
| blaCTX-M-06              | 40B |       |       |      | LowEfficiency, CtIsSmall, S <sub>e</sub> |
| blaGES                   | 40B |       |       |      | LowEfficiency, CtIsSmall, S <sub>e</sub> |
| blaIMP-01                | 40B |       |       |      | LowEfficiency, CtIsSmall, S <sub>e</sub> |
| blaIMP-02                | 40B |       |       |      | CurveFitFailed                           |
| blaMOX/blaC              | 40B |       |       |      | LowEfficiency, CtIsSmall, S <sub>e</sub> |
| blaOCH                   | 40B |       |       |      | NoAmplification                          |
| blaOKP                   | 40B |       |       |      | NoAmplification                          |
| blaOXA1/blaC             | 40B |       |       |      | LowEfficiency, CtIsSmall, S <sub>e</sub> |
| blaOXA10-01              | 40B |       |       |      | LowEfficiency, CtIsSmall, S <sub>e</sub> |
| blaOXA10-02              | 40B |       |       |      | LowEfficiency, CtIsSmall, S <sub>e</sub> |
| blaOXY                   | 40B |       |       |      | CurveFitFailed                           |
| blaPAO                   | 40B |       |       |      | CurveFitFailed                           |
| blaPER                   | 40B |       |       |      | LowEfficiency, CtIsSmall, S <sub>e</sub> |
| blaPSE                   | 40B |       |       |      | LowEfficiency, CtIsSmall, S <sub>e</sub> |
| blaROB                   | 40B | 35.42 | 75.66 | 1.76 | MultipleMeltPeaks                        |
| blaSFO                   | 40B |       |       |      | CurveFitFailed                           |
| blaSHV-01                | 40B |       |       |      | LowEfficiency, CtIsSmall, S <sub>e</sub> |
| blaSHV-02                | 40B |       |       |      | CurveFitFailed                           |
| blaTEM                   | 40B | 25.11 | 79.02 | 1.64 |                                          |
| blaTLA                   | 40B |       |       |      | LowEfficiency, CtIsSmall, S <sub>e</sub> |
| blaVEB                   | 40B |       |       |      | LowEfficiency, CtIsSmall, S <sub>e</sub> |
| blaVIM                   | 40B |       |       |      | LowEfficiency, CtIsSmall, S <sub>e</sub> |
| blaZ                     | 40B |       |       |      | LowEfficiency, CtIsSmall, S <sub>e</sub> |
| carB                     | 40B |       |       |      | LowEfficiency, CtIsSmall, S <sub>e</sub> |
| catA1                    | 40B |       |       |      | NoAmplification                          |
| catB3                    | 40B | 34.91 | 79.88 | 2.01 | MultipleMeltPeaks                        |
| catB8                    | 40B | 33.85 | 81.53 | 1.98 |                                          |

|            |     |       |       |      |                                          |
|------------|-----|-------|-------|------|------------------------------------------|
| ceoA       | 40B | 29.98 | 86.18 | 1.97 | MultipleMeltPeaks                        |
| cepA       | 40B | 29.64 | 78.08 | 1.95 |                                          |
| cfiA       | 40B | 33.69 | 76.37 | 1.91 | MultipleMeltPeaks                        |
| cfr        | 40B |       |       |      | LowEfficiency, CtIsSmall, S <sub>e</sub> |
| cfxA       | 40B | 21.74 | 77.48 | 1.92 |                                          |
| cmeA       | 40B |       |       |      | LowEfficiency, CtIsSmall, S <sub>e</sub> |
| cmlA1-01   | 40B |       |       |      | CurveFitFailed                           |
| cmlA1-02   | 40B |       |       |      | CurveFitFailed                           |
| cmr        | 40B |       |       |      | LowEfficiency, CtIsSmall, S <sub>e</sub> |
| cmx(A)     | 40B | 27.28 | 84.48 | 2.01 |                                          |
| cphA-01    | 40B | 31.71 | 89.28 | 1.65 |                                          |
| cphA-02    | 40B |       |       |      | LowEfficiency, CtIsSmall, S <sub>e</sub> |
| dfrA1      | 40B |       |       |      | CurveFitFailed                           |
| dfrA12     | 40B |       |       |      | LowEfficiency, CtIsSmall, S <sub>e</sub> |
| emrD       | 40B | 33.62 | 90.71 | 1.77 |                                          |
| ereA       | 40B |       |       |      | LowEfficiency, CtIsSmall, S <sub>e</sub> |
| ereB       | 40B |       |       |      | LowEfficiency, CtIsSmall, S <sub>e</sub> |
| erm(34)    | 40B |       |       |      | LowEfficiency, CtIsSmall, S <sub>e</sub> |
| erm(35)    | 40B |       |       |      | LowEfficiency, CtIsSmall, S <sub>e</sub> |
| erm(36)    | 40B |       |       |      | LowEfficiency, CtIsSmall, S <sub>e</sub> |
| ermA       | 40B |       |       |      | LowEfficiency, CtIsSmall, S <sub>e</sub> |
| ermA/ermTR | 40B | 32.38 | 75.24 | 1.98 |                                          |
| ermB       | 40B | 26.62 | 74.78 | 2.01 |                                          |
| ermC       | 40B |       |       |      | LowEfficiency, CtIsSmall, S <sub>e</sub> |
| ermF       | 40B |       |       |      | CurveFitFailed                           |
| ermJ/ermD  | 40B |       |       |      | LowEfficiency, CtIsSmall, S <sub>e</sub> |
| ermK-01    | 40B |       |       |      | LowEfficiency, CtIsSmall, S <sub>e</sub> |
| ermK-02    | 40B |       |       |      | LowEfficiency, CtIsSmall, S <sub>e</sub> |
| ermT-01    | 40B |       |       |      | LowEfficiency, CtIsSmall, S <sub>e</sub> |
| ermT-02    | 40B |       |       |      | LowEfficiency, CtIsSmall, S <sub>e</sub> |
| ermX       | 40B |       |       |      | LowEfficiency, CtIsSmall, S <sub>e</sub> |
| ermY       | 40B |       |       |      | LowEfficiency, CtIsSmall, S <sub>e</sub> |
| fabK       | 40B | 22.22 | 78.55 | 2.22 |                                          |
| floR       | 40B |       |       |      | NoAmplification                          |
| folA       | 40B |       |       |      | NoAmplification                          |
| fosB       | 40B |       |       |      | LowEfficiency, CtIsSmall, S <sub>e</sub> |
| fosX       | 40B |       |       |      | LowEfficiency, CtIsSmall, S <sub>e</sub> |
| fox5       | 40B | 30.47 | 86.2  | 1.86 |                                          |
| imiR       | 40B |       |       |      | LowEfficiency, CtIsSmall, S <sub>e</sub> |
| ImrA-01    | 40B |       |       |      | CurveFitFailed                           |
| intl       | 40B | 33.98 | 78.51 | 1.98 | MultipleMeltPeaks                        |
| intl1      | 40B | 22.25 | 83.67 | 2.06 | MultipleMeltPeaks                        |
| IS613      | 40B | 23.56 | 79.63 | 2.06 |                                          |
| lnuA-01    | 40B |       |       |      | LowEfficiency, CtIsSmall, S <sub>e</sub> |
| lnuB-01    | 40B |       |       |      | LowEfficiency, CtIsSmall, S <sub>e</sub> |
| lnuB-02    | 40B |       |       |      | CurveFitFailed                           |

|                |     |       |       |      |                                          |
|----------------|-----|-------|-------|------|------------------------------------------|
| lnuC           | 40B |       |       |      | LowEfficiency, CtIsSmall, S <sub>e</sub> |
| marR-01        | 40B |       |       |      | CurveFitFailed                           |
| matA/mel       | 40B | 17.72 | 77.59 | 2.06 |                                          |
| mdet1          | 40B |       |       |      | LowEfficiency, CtIsSmall, S <sub>e</sub> |
| mdtA           | 40B |       |       |      | CurveFitFailed                           |
| mdtE/yhiU      | 40B |       |       |      | CurveFitFailed                           |
| mecA           | 40B |       |       |      | LowEfficiency, CtIsSmall, S <sub>e</sub> |
| mefA           | 40B | 17.29 | 80.77 | 2.06 |                                          |
| mepA           | 40B | 34.56 | 76.31 | 1.97 |                                          |
| mexA           | 40B |       |       |      | LowEfficiency, CtIsSmall, S <sub>e</sub> |
| mexD           | 40B |       |       |      | CurveFitFailed                           |
| mexE           | 40B |       |       |      | LowEfficiency, CtIsSmall, S <sub>e</sub> |
| mexF           | 40B | 27.57 | 89.49 | 1.78 |                                          |
| mphA-01        | 40B | 30.48 | 88.86 | 1.93 |                                          |
| mphA-02        | 40B | 33.63 | 90.47 | 1.53 |                                          |
| mphB           | 40B |       |       |      | LowEfficiency, CtIsSmall, S <sub>e</sub> |
| mphC           | 40B |       |       |      | LowEfficiency, CtIsSmall, S <sub>e</sub> |
| msrA-01        | 40B |       |       |      | LowEfficiency, CtIsSmall, S <sub>e</sub> |
| msrC-01        | 40B |       |       |      | NoAmplification                          |
| mtrC-01        | 40B |       |       |      | LowEfficiency, CtIsSmall, C <sub>i</sub> |
| mtrC-02        | 40B |       |       |      | LowEfficiency, CtIsSmall, S <sub>e</sub> |
| mtrD-02        | 40B | 27.15 | 81.27 | 2.02 |                                          |
| mtrD-03        | 40B |       |       |      | NoAmplification                          |
| NDM1           | 40B |       |       |      | LowEfficiency, CtIsSmall, S <sub>e</sub> |
| nimE           | 40B |       |       |      | LowEfficiency, CtIsSmall, S <sub>e</sub> |
| nisB           | 40B |       |       |      | LowEfficiency, CtIsSmall, S <sub>e</sub> |
| oleC           | 40B | 35.96 | 86.48 | 1.85 |                                          |
| oprD           | 40B | 29.9  | 86.7  | 2    |                                          |
| oprJ           | 40B | 31.16 | 89.24 | 1.87 |                                          |
| pbp            | 40B |       |       |      | CurveFitFailed                           |
| pbp2x          | 40B | 21.75 | 75.12 | 1.87 |                                          |
| Pbp5           | 40B |       |       |      | LowEfficiency, CtIsSmall, S <sub>e</sub> |
| penA           | 40B |       |       |      | CurveFitFailed                           |
| pikR1          | 40B |       |       |      | CurveFitFailed                           |
| pikR2          | 40B | 34.73 | 84.71 | 1.87 | MultipleMeltPeaks                        |
| pmrA           | 40B | 20.92 | 78.8  | 2.13 |                                          |
| pncA           | 40B | 32.43 | 89.03 | 1.95 | MultipleMeltPeaks                        |
| putative multi | 40B |       |       |      | LowEfficiency, CtIsSmall, S <sub>e</sub> |
| qac            | 40B |       |       |      | LowEfficiency, CtIsSmall, S <sub>e</sub> |
| qacA           | 40B |       |       |      | LowEfficiency, CtIsSmall, S <sub>e</sub> |
| qacA/qacB      | 40B |       |       |      | LowEfficiency, CtIsSmall, S <sub>e</sub> |
| qacEdelta1-0   | 40B |       |       |      | LowEfficiency, CtIsSmall, S <sub>e</sub> |
| qacEdelta1-0   | 40B | 29.41 | 77.62 | 1.95 | MultipleMeltPeaks                        |
| qacH-01        | 40B |       |       |      | CurveFitFailed                           |
| qacH-02        | 40B | 35.85 | 79.23 | 1.96 |                                          |
| qnrA           | 40B |       |       |      | LowEfficiency, CtIsSmall, S <sub>e</sub> |

|              |     |       |       |      |                                          |
|--------------|-----|-------|-------|------|------------------------------------------|
| rarD-02      | 40B | 34.58 | 82.76 | 1.94 |                                          |
| sat4         | 40B |       |       |      | LowEfficiency, CtIsSmall, S <sub>e</sub> |
| sdeB         | 40B |       |       |      | LowEfficiency, CtIsSmall, S <sub>e</sub> |
| spcN-01      | 40B |       |       |      | LowEfficiency, CtIsSmall, S <sub>e</sub> |
| speA         | 40B |       |       |      | LowEfficiency, CtIsSmall, S <sub>e</sub> |
| str          | 40B |       |       |      | LowEfficiency, CtIsSmall, S <sub>e</sub> |
| strA         | 40B |       |       |      | LowEfficiency, CtIsSmall, S <sub>e</sub> |
| strB         | 40B | 35.28 | 85.05 | 1.94 | MultipleMeltPeaks                        |
| sul1         | 40B |       |       |      | NoAmplification                          |
| sul2         | 40B | 30.01 | 85.66 | 1.97 |                                          |
| sulA/foIP-01 | 40B | 20.15 | 80.76 | 2.05 |                                          |
| sulA/foIP-03 | 40B | 20.3  | 83.46 | 2.01 |                                          |
| tet(32)      | 40B | 25.99 | 81.19 | 1.99 |                                          |
| tet(34)      | 40B |       |       |      | CurveFitFailed                           |
| tet(35)      | 40B |       |       |      | NoAmplification                          |
| tet(36)-A    | 40B |       |       |      | LowEfficiency, CtIsSmall, S <sub>e</sub> |
| tet(36)-B    | 40B |       |       |      | LowEfficiency, CtIsSmall, S <sub>e</sub> |
| tet(37)      | 40B | 24.09 | 76.45 | 1.97 |                                          |
| tetA-01      | 40B | 34.99 | 85.1  | 1.95 |                                          |
| tetA-02      | 40B |       |       |      | CurveFitFailed                           |
| tetB-01      | 40B |       |       |      | LowEfficiency, CtIsSmall, S <sub>e</sub> |
| tetB-02      | 40B |       |       |      | LowEfficiency, CtIsSmall, S <sub>e</sub> |
| tetC-01      | 40B |       |       |      | NoAmplification                          |
| tetC-02      | 40B |       |       |      | LowEfficiency, CtIsSmall, S <sub>e</sub> |
| tetD-01      | 40B |       |       |      | LowEfficiency, CtIsSmall, S <sub>e</sub> |
| tetD-02      | 40B | 31.46 | 85.25 | 1.96 |                                          |
| tetE         | 40B |       |       |      | LowEfficiency, CtIsSmall, C <sub>i</sub> |
| tetG-01      | 40B | 33.52 | 89.26 | 2.1  |                                          |
| tetG-02      | 40B | 34.22 | 82.4  | 1.84 |                                          |
| tetH         | 40B |       |       |      | LowEfficiency, CtIsSmall, S <sub>e</sub> |
| tetJ         | 40B |       |       |      | LowEfficiency, CtIsSmall, S <sub>e</sub> |
| tetK         | 40B |       |       |      | LowEfficiency, CtIsSmall, S <sub>e</sub> |
| tetL-01      | 40B |       |       |      | LowEfficiency, CtIsSmall, S <sub>e</sub> |
| tetL-02      | 40B | 36.48 | 85.4  | 1.67 |                                          |
| tetM-01      | 40B | 21.28 | 76.03 | 2.03 |                                          |
| tetM-02      | 40B | 21.14 | 77.59 | 2.07 |                                          |
| tetO-01      | 40B |       |       |      | LowEfficiency, CtIsSmall, S <sub>e</sub> |
| tetPA        | 40B |       |       |      | LowEfficiency, CtIsSmall, S <sub>e</sub> |
| tetPB-01     | 40B |       |       |      | BadR2, LowEfficiency, CtIsS              |
| tetPB-02     | 40B | 29.76 | 84.85 | 1.96 |                                          |
| tetPB-03     | 40B |       |       |      | LowEfficiency, CtIsSmall, S <sub>e</sub> |
| tetPB-05     | 40B |       |       |      | CurveFitFailed                           |
| tetQ         | 40B | 22.68 | 77.32 | 2.04 |                                          |
| tetR-02      | 40B | 32.17 | 80.15 | 1.88 |                                          |
| tetR-03      | 40B |       |       |      | LowEfficiency, CtIsSmall, S <sub>e</sub> |
| tetS         | 40B |       |       |      | LowEfficiency, CtIsSmall, S <sub>e</sub> |

|             |     |       |       |      |                                          |
|-------------|-----|-------|-------|------|------------------------------------------|
| tetT        | 40B |       |       |      | LowEfficiency, CtIsSmall, S <sub>e</sub> |
| tetU-01     | 40B |       |       |      | LowEfficiency, CtIsSmall, S <sub>e</sub> |
| tetV        | 40B |       |       |      | CurveFitFailed                           |
| tetW-01     | 40B | 23.86 | 81.6  | 2.08 |                                          |
| tetX        | 40B |       |       |      | LowEfficiency, CtIsSmall, S <sub>e</sub> |
| tnpA-01     | 40B |       |       |      | LowEfficiency, CtIsSmall, S <sub>e</sub> |
| tnpA-02     | 40B | 29.59 | 84.86 | 1.78 |                                          |
| tnpA-03     | 40B | 29.46 | 77.12 | 1.9  |                                          |
| tnpA-04     | 40B | 36.37 | 77.04 | 1.87 |                                          |
| tnpA-05     | 40B |       |       |      | LowEfficiency, CtIsSmall, S <sub>e</sub> |
| tnpA-07     | 40B |       |       |      | LowEfficiency, CtIsSmall, S <sub>e</sub> |
| tolC-01     | 40B |       |       |      | LowEfficiency, CtIsSmall, S <sub>e</sub> |
| tolC-02     | 40B | 30.95 | 85.47 | 1.98 |                                          |
| tolC-03     | 40B | 32.09 | 87.32 | 1.93 | MultipleMeltPeaks                        |
| Tp614       | 40B |       |       |      | LowEfficiency, CtIsSmall, S <sub>e</sub> |
| ttgA        | 40B |       |       |      | CurveFitFailed                           |
| ttgB        | 40B |       |       |      | LowEfficiency, CtIsSmall, S <sub>e</sub> |
| vanA        | 40B |       |       |      | LowEfficiency, CtIsSmall, S <sub>e</sub> |
| vanB-01     | 40B | 31.17 | 83.09 | 1.7  |                                          |
| vanC-01     | 40B |       |       |      | LowEfficiency, CtIsSmall, S <sub>e</sub> |
| vanC-02     | 40B |       |       |      | LowEfficiency, CtIsSmall, S <sub>e</sub> |
| vanC-03     | 40B | 28.37 | 85.91 | 1.99 | MultipleMeltPeaks                        |
| vanC1       | 40B |       |       |      | LowEfficiency, CtIsSmall, S <sub>e</sub> |
| vanC2/vanC3 | 40B |       |       |      | CurveFitFailed                           |
| vanG        | 40B |       |       |      | BadR2, CtIsSmall, Saturatio              |
| vanHB       | 40B |       |       |      | LowEfficiency, CtIsSmall, S <sub>e</sub> |
| vanHD       | 40B |       |       |      | LowEfficiency, CtIsSmall, S <sub>e</sub> |
| vanRA-01    | 40B |       |       |      | LowEfficiency, CtIsSmall, S <sub>e</sub> |
| vanRA-02    | 40B |       |       |      | LowEfficiency, CtIsSmall, S <sub>e</sub> |
| vanRB       | 40B | 34.3  | 81.67 | 1.95 |                                          |
| vanRC       | 40B |       |       |      | LowEfficiency, CtIsSmall, S <sub>e</sub> |
| vanRC4      | 40B |       |       |      | CurveFitFailed                           |
| vanRD       | 40B |       |       |      | LowEfficiency, CtIsSmall, Ct             |
| vanSA       | 40B |       |       |      | LowEfficiency, CtIsSmall, S <sub>e</sub> |
| vanSB       | 40B |       |       |      | LowEfficiency, CtIsSmall, S <sub>e</sub> |
| vanSC-01    | 40B | 31.31 | 84.04 | 1.75 |                                          |
| vanSC-02    | 40B | 32.89 | 75.63 | 1.87 |                                          |
| vanTC-01    | 40B |       |       |      | LowEfficiency, CtIsSmall, S <sub>e</sub> |
| vanTC-02    | 40B |       |       |      | LowEfficiency, CtIsSmall, S <sub>e</sub> |
| vanTE       | 40B |       |       |      | LowEfficiency, CtIsSmall, S <sub>e</sub> |
| vanTG       | 40B |       |       |      | BadR2, CtIsSmall, Saturatio              |
| vanWB       | 40B |       |       |      | LowEfficiency, CtIsSmall, S <sub>e</sub> |
| vanWG       | 40B |       |       |      | LowEfficiency, CtIsSmall, S <sub>e</sub> |
| vanXA       | 40B |       |       |      | LowEfficiency, CtIsSmall, S <sub>e</sub> |
| vanXB       | 40B |       |       |      | LowEfficiency, CtIsSmall, Ct             |
| vanXD       | 40B | 34.57 | 74.26 | 2.03 |                                          |

|              |     |       |       |      |                              |
|--------------|-----|-------|-------|------|------------------------------|
| vanYB        | 40B |       |       |      | LowEfficiency, CtIsSmall, S: |
| vanYD-01     | 40B | 34.74 | 81.3  | 1.88 |                              |
| vanYD-02     | 40B |       |       |      | LowEfficiency, CtIsSmall, S: |
| vatB-01      | 40B |       |       |      | LowEfficiency, CtIsSmall, S: |
| vatB-02      | 40B |       |       |      | LowEfficiency, CtIsSmall, S: |
| vatC-01      | 40B |       |       |      | LowEfficiency, CtIsSmall, S: |
| vatC-02      | 40B |       |       |      | LowEfficiency, CtIsSmall, S: |
| vatE-01      | 40B |       |       |      | CurveFitFailed               |
| vatE-02      | 40B |       |       |      | LowEfficiency, CtIsSmall, S: |
| vgaA-01      | 40B |       |       |      | LowEfficiency, CtIsSmall, S: |
| vgaA-02      | 40B |       |       |      | LowEfficiency, CtIsSmall, S: |
| vgb-01       | 40B |       |       |      | LowEfficiency, CtIsSmall, S: |
| vgbB-01      | 40B |       |       |      | LowEfficiency, CtIsSmall, S: |
| vgbB-02      | 40B |       |       |      | LowEfficiency, CtIsSmall, S: |
| yceE/mdtG-0  | 40B |       |       |      | LowEfficiency, CtIsSmall, S: |
| yceE/mdtG-0  | 40B |       |       |      | LowEfficiency, CtIsSmall, S: |
| yceL/mdtH-0  | 40B | 36.11 | 83.23 | 1.86 |                              |
| yceL/mdtH-0  | 40B |       |       |      | LowEfficiency, CtIsSmall, S: |
| yceL/mdtH-0  | 40B |       |       |      | CurveFitFailed               |
| yidY/mdtL-01 | 40B |       |       |      | LowEfficiency, CtIsSmall, S: |
| yidY/mdtL-02 | 40B |       |       |      | LowEfficiency, CtIsSmall, S: |































| Assay          | Sample | Ct | Tm    | Efficiency | flag                        |
|----------------|--------|----|-------|------------|-----------------------------|
| 16S rRNA       | 40C    |    | 15.02 | 82.3       | 2.07                        |
| aac            | 40C    |    | 29.61 | 86.37      | 1.48 MultipleMeltPeaks      |
| aac(6')-Ib(akz | 40C    |    |       |            | LowEfficiency, CtIsSmall, C |
| aac(6')-Ib(akz | 40C    |    | 30.96 | 81.75      | 2.02                        |
| aac(6')-Ib(akz | 40C    |    |       |            | CurveFitFailed              |
| aac(6')-II     | 40C    |    |       |            | LowEfficiency, CtIsSmall, C |
| aac(6')I1      | 40C    |    | 35.55 | 90.47      | 1.82 MultipleMeltPeaks      |
| aacA/aphD      | 40C    |    |       |            | CurveFitFailed              |
| aacC           | 40C    |    | 30.98 | 85.54      | 2                           |
| aacC1          | 40C    |    | 33.88 | 89.49      | 1.9                         |
| aacC2          | 40C    |    |       |            | LowEfficiency, CtIsSmall, C |
| aacC4          | 40C    |    | 32.48 | 88.43      | 1.94 MultipleMeltPeaks      |
| aadA-01        | 40C    |    |       |            | LowEfficiency, CtIsSmall, C |
| aadA-02        | 40C    |    |       |            | CurveFitFailed              |
| aadA-1-01      | 40C    |    | 35.16 | 81.2       | 1.96 MultipleMeltPeaks      |
| aadA-1-02      | 40C    |    |       |            | LowEfficiency, CtIsSmall, S |
| aadA1          | 40C    |    | 34.2  | 83.53      | 2.12                        |
| aadA2-01       | 40C    |    |       |            | LowEfficiency, CtIsSmall, S |
| aadA2-02       | 40C    |    | 34.15 | 74.74      | 2.01                        |
| aadA2-03       | 40C    |    |       |            | LowEfficiency, CtIsSmall, C |
| aadA5-01       | 40C    |    | 35.09 | 77.71      | 1.97                        |
| aadA5-02       | 40C    |    | 35.95 | 83.51      | 1.93 MultipleMeltPeaks      |
| aadA9-01       | 40C    |    |       |            | CurveFitFailed              |
| aadA9-02       | 40C    |    |       |            | LowEfficiency, CtIsSmall, S |
| aadD           | 40C    |    |       |            | LowEfficiency, CtIsSmall, C |
| aadE           | 40C    |    |       |            | LowEfficiency, CtIsSmall, C |
| acrA-01        | 40C    |    | 31.93 | 82.38      | 2                           |
| acrA-02        | 40C    |    | 33.73 | 79.31      | 1.95 MultipleMeltPeaks      |
| acrA-03        | 40C    |    |       |            | CurveFitFailed              |
| acrA-04        | 40C    |    | 31.87 | 90.43      | 1.7                         |
| acrA-05        | 40C    |    | 29.4  | 92.27      | 2.01                        |
| acrB-01        | 40C    |    |       |            | LowEfficiency, CtIsSmall, S |
| acrF           | 40C    |    | 33.39 | 82.08      | 1.99                        |
| acrR-01        | 40C    |    | 36.77 | 81.3       | 1.93                        |
| acrR-02        | 40C    |    |       |            | LowEfficiency, CtIsSmall, S |
| Actin          | 40C    |    | 20.12 | 87.02      | 2.01                        |
| adeA           | 40C    |    |       |            | LowEfficiency, CtIsSmall, C |
| ampC-01        | 40C    |    |       |            | CurveFitFailed              |
| ampC-02        | 40C    |    |       |            | CurveFitFailed              |
| ampC-04        | 40C    |    | 33.58 | 78.26      | 1.88                        |
| ampC-05        | 40C    |    |       |            | LowEfficiency, CtIsSmall, S |
| ampC-06        | 40C    |    |       |            | LowEfficiency, CtIsSmall, C |
| ampC-07        | 40C    |    | 34.78 | 88.1       | 1.87                        |
| ampC-09        | 40C    |    |       |            | LowEfficiency, CtIsSmall, S |
| ampC/blaDH     | 40C    |    | 30.53 | 85.53      | 1.99                        |

|                            |     |       |       |      |                              |
|----------------------------|-----|-------|-------|------|------------------------------|
| aph                        | 40C |       |       |      | LowEfficiency, CtIsSmall, Ci |
| aph(2')-Id-01              | 40C |       |       |      | LowEfficiency, CtIsSmall, Ci |
| aph(2')-Id-02              | 40C |       |       |      | LowEfficiency, CtIsSmall, Ci |
| aph6ia                     | 40C | 29.96 | 78.02 | 2.04 | MultipleMeltPeaks            |
| aphA1(aka k <sub>z</sub> ) | 40C |       |       |      | LowEfficiency, CtIsSmall, Ci |
| bacA-01                    | 40C |       |       |      | CurveFitFailed               |
| bacA-02                    | 40C | 33.14 | 88.24 | 1.81 |                              |
| BETA-globin                | 40C | 21.35 | 84.12 | 2.01 |                              |
| bla-ACC-1                  | 40C | 33.21 | 85.95 | 1.94 | MultipleMeltPeaks            |
| bla-L1                     | 40C | 30.21 | 85.52 | 1.97 | MultipleMeltPeaks            |
| bla1                       | 40C |       |       |      | LowEfficiency, CtIsSmall, Ci |
| blaCMY                     | 40C |       |       |      | CurveFitFailed               |
| blaCMY2-01                 | 40C |       |       |      | BadR2, LowEfficiency, CtIsS  |
| blaCMY2-02                 | 40C | 31.34 | 85.17 | 1.95 |                              |
| blaCTX-M-01                | 40C |       |       |      | CurveFitFailed               |
| blaCTX-M-02                | 40C |       |       |      | CurveFitFailed               |
| blaCTX-M-03                | 40C |       |       |      | LowEfficiency, CtIsSmall, Ci |
| blaCTX-M-04                | 40C | 33.11 | 88.2  | 1.96 |                              |
| blaCTX-M-05                | 40C | 34.61 | 76.08 | 1.87 |                              |
| blaCTX-M-06                | 40C | 35.71 | 85.27 | 1.9  |                              |
| blaGES                     | 40C |       |       |      | LowEfficiency, CtIsSmall, Ci |
| blaIMP-01                  | 40C |       |       |      | LowEfficiency, CtIsSmall, Ci |
| blaIMP-02                  | 40C |       |       |      | LowEfficiency, CtIsSmall, Ci |
| blaMOX/blaC                | 40C |       |       |      | CurveFitFailed               |
| blaOCH                     | 40C |       |       |      | NoAmplification              |
| blaOKP                     | 40C |       |       |      | NoAmplification              |
| blaOXA1/blaC               | 40C |       |       |      | LowEfficiency, CtIsSmall, S; |
| blaOXA10-01                | 40C |       |       |      | CurveFitFailed               |
| blaOXA10-02                | 40C |       |       |      | CurveFitFailed               |
| blaOXY                     | 40C |       |       |      | BadR2, LowEfficiency, CtIsS  |
| blaPAO                     | 40C |       |       |      | LowEfficiency, CtIsSmall, Ci |
| blaPER                     | 40C |       |       |      | LowEfficiency, CtIsSmall, Ci |
| blaPSE                     | 40C |       |       |      | LowEfficiency, CtIsSmall, Ci |
| blaROB                     | 40C | 34.32 | 89.37 | 1.9  |                              |
| blaSFO                     | 40C | 31.74 | 88.67 | 1.92 |                              |
| blaSHV-01                  | 40C |       |       |      | LowEfficiency, CtIsSmall, Ci |
| blaSHV-02                  | 40C | 30.18 | 85.68 | 1.88 |                              |
| blaTEM                     | 40C | 24.35 | 78.96 | 1.69 |                              |
| blaTLA                     | 40C |       |       |      | LowEfficiency, CtIsSmall, Ci |
| blaVEB                     | 40C |       |       |      | LowEfficiency, CtIsSmall, Ci |
| blaVIM                     | 40C |       |       |      | LowEfficiency, CtIsSmall, Ci |
| blaZ                       | 40C |       |       |      | LowEfficiency, CtIsSmall, Ci |
| carB                       | 40C |       |       |      | LowEfficiency, CtIsSmall, Ci |
| catA1                      | 40C |       |       |      | NoAmplification              |
| catB3                      | 40C |       |       |      | CurveFitFailed               |
| catB8                      | 40C | 32.28 | 81.9  | 1.96 |                              |

|            |     |       |       |      |                              |
|------------|-----|-------|-------|------|------------------------------|
| ceoA       | 40C | 27.38 | 82.18 | 1.98 | MultipleMeltPeaks            |
| cepA       | 40C |       |       |      | CurveFitFailed               |
| cfiA       | 40C | 33.65 | 84.35 | 1.86 | MultipleMeltPeaks            |
| cfr        | 40C |       |       |      | LowEfficiency, CtIsSmall, S: |
| cfxA       | 40C | 19.69 | 77.48 | 1.88 |                              |
| cmeA       | 40C |       |       |      | CurveFitFailed               |
| cmlA1-01   | 40C | 35.64 | 89.24 | 1.97 |                              |
| cmlA1-02   | 40C |       |       |      | CurveFitFailed               |
| cmr        | 40C |       |       |      | LowEfficiency, CtIsSmall, S: |
| cmx(A)     | 40C | 30.44 | 84.77 | 1.82 |                              |
| cphA-01    | 40C | 34.19 | 84.9  | 1.91 |                              |
| cphA-02    | 40C |       |       |      | CurveFitFailed               |
| dfrA1      | 40C |       |       |      | LowEfficiency, CtIsSmall, Ci |
| dfrA12     | 40C |       |       |      | LowEfficiency, CtIsSmall, Ci |
| emrD       | 40C | 33.09 | 82.9  | 1.8  | MultipleMeltPeaks            |
| ereA       | 40C |       |       |      | LowEfficiency, CtIsSmall, Ci |
| ereB       | 40C |       |       |      | CurveFitFailed               |
| erm(34)    | 40C |       |       |      | NoAmplification              |
| erm(35)    | 40C |       |       |      | LowEfficiency, CtIsSmall, Ci |
| erm(36)    | 40C |       |       |      | CurveFitFailed               |
| ermA       | 40C |       |       |      | LowEfficiency, CtIsSmall, Ci |
| ermA/ermTR | 40C |       |       |      | NoAmplification              |
| ermB       | 40C | 24.51 | 74.83 | 2.1  |                              |
| ermC       | 40C |       |       |      | LowEfficiency, CtIsSmall, Ci |
| ermF       | 40C |       |       |      | CurveFitFailed               |
| ermJ/ermD  | 40C |       |       |      | LowEfficiency, CtIsSmall, Ci |
| ermK-01    | 40C | 36.42 | 73.29 | 1.98 |                              |
| ermK-02    | 40C |       |       |      | CurveFitFailed               |
| ermT-01    | 40C |       |       |      | LowEfficiency, CtIsSmall, Ci |
| ermT-02    | 40C |       |       |      | LowEfficiency, CtIsSmall, Ci |
| ermX       | 40C |       |       |      | LowEfficiency, CtIsSmall, S: |
| ermY       | 40C |       |       |      | LowEfficiency, CtIsSmall, Ci |
| fabK       | 40C | 17.97 | 77.5  | 2.12 |                              |
| floR       | 40C | 36.66 | 82.89 | 1.83 | MultipleMeltPeaks            |
| folA       | 40C |       |       |      | BadR2, LowEfficiency, CtIsS  |
| fosB       | 40C |       |       |      | LowEfficiency, CtIsSmall, S: |
| fosX       | 40C |       |       |      | NoAmplification              |
| fox5       | 40C | 28.49 | 86.13 | 1.85 |                              |
| imiR       | 40C |       |       |      | LowEfficiency, CtIsSmall, S: |
| ImrA-01    | 40C |       |       |      | CurveFitFailed               |
| intl       | 40C | 30.9  | 84.46 | 1.94 |                              |
| intl1      | 40C | 21.11 | 87.07 | 2.04 | MultipleMeltPeaks            |
| IS613      | 40C | 21.36 | 79.53 | 2.19 |                              |
| lnuA-01    | 40C |       |       |      | LowEfficiency, CtIsSmall, Ci |
| lnuB-01    | 40C |       |       |      | LowEfficiency, CtIsSmall, Ci |
| lnuB-02    | 40C |       |       |      | LowEfficiency, CtIsSmall, Ci |

|                |     |       |       |      |                              |
|----------------|-----|-------|-------|------|------------------------------|
| lnuC           | 40C |       |       |      | CurveFitFailed               |
| marR-01        | 40C | 35.69 | 85.79 | 1.92 |                              |
| matA/mel       | 40C | 16.92 | 77.59 | 2.13 |                              |
| mdet1          | 40C |       |       |      | LowEfficiency, CtIsSmall, Ci |
| mdtA           | 40C |       |       |      | CurveFitFailed               |
| mdtE/yhiU      | 40C | 35.3  | 90.33 | 1.91 | MultipleMeltPeaks            |
| mecA           | 40C |       |       |      | LowEfficiency, CtIsSmall, Ci |
| mefA           | 40C | 16.35 | 80.55 | 2.08 |                              |
| mepA           | 40C | 31.5  | 91.15 | 1.76 |                              |
| mexA           | 40C |       |       |      | CurveFitFailed               |
| mexD           | 40C |       |       |      | CurveFitFailed               |
| mexE           | 40C | 37.85 | 84.83 | 1.82 | MultipleMeltPeaks            |
| mexF           | 40C | 29.6  | 81.55 | 1.74 | MultipleMeltPeaks            |
| mphA-01        | 40C | 28.45 | 89.06 | 1.98 |                              |
| mphA-02        | 40C | 31.51 | 86.72 | 1.72 |                              |
| mphB           | 40C | 35.48 | 85.83 | 1.99 |                              |
| mphC           | 40C |       |       |      | LowEfficiency, CtIsSmall, Ci |
| msrA-01        | 40C |       |       |      | LowEfficiency, CtIsSmall, Ci |
| msrC-01        | 40C |       |       |      | NoAmplification              |
| mtrC-01        | 40C | 35.64 | 88.55 | 1.89 | MultipleMeltPeaks            |
| mtrC-02        | 40C | 31.79 | 84.69 | 1.84 |                              |
| mtrD-02        | 40C | 27.15 | 81.01 | 2.04 |                              |
| mtrD-03        | 40C | 35.78 | 82.13 | 1.91 |                              |
| NDM1           | 40C |       |       |      | LowEfficiency, CtIsSmall, Ci |
| nimE           | 40C | 28.92 | 76.64 | 1.93 |                              |
| nisB           | 40C |       |       |      | LowEfficiency, CtIsSmall, Ci |
| oleC           | 40C | 32.59 | 87.71 | 1.98 |                              |
| oprD           | 40C | 29.17 | 86.86 | 2.02 | MultipleMeltPeaks            |
| oprJ           | 40C | 30.76 | 91.96 | 1.93 |                              |
| pbp            | 40C |       |       |      | LowEfficiency, CtIsSmall, S  |
| pbp2x          | 40C | 17.94 | 75.13 | 1.92 |                              |
| Pbp5           | 40C |       |       |      | CurveFitFailed               |
| penA           | 40C |       |       |      | BadR2, LowEfficiency, CtIsS  |
| pikR1          | 40C |       |       |      | CurveFitFailed               |
| pikR2          | 40C | 32.33 | 84.76 | 1.81 |                              |
| pmrA           | 40C | 20.35 | 79.68 | 2.03 |                              |
| pncA           | 40C | 31.58 | 88.26 | 1.84 |                              |
| putative multi | 40C |       |       |      | LowEfficiency, CtIsSmall, Ci |
| qac            | 40C |       |       |      | CurveFitFailed               |
| qacA           | 40C |       |       |      | LowEfficiency, CtIsSmall, Ci |
| qacA/qacB      | 40C |       |       |      | LowEfficiency, CtIsSmall, Ci |
| qacEdelta1-0   | 40C |       |       |      | LowEfficiency, CtIsSmall, Ci |
| qacEdelta1-0   | 40C | 35.19 | 91.03 | 1.85 |                              |
| qacH-01        | 40C | 35.05 | 83.6  | 1.82 | MultipleMeltPeaks            |
| qacH-02        | 40C |       |       |      | CurveFitFailed               |
| qnrA           | 40C |       |       |      | CurveFitFailed               |



|              |     |       |       |      |                              |
|--------------|-----|-------|-------|------|------------------------------|
| rarD-02      | 40C |       |       |      | LowEfficiency, CtIsSmall, Ci |
| sat4         | 40C |       |       |      | LowEfficiency, CtIsSmall, Ci |
| sdeB         | 40C |       |       |      | LowEfficiency, CtIsSmall, Ci |
| spcN-01      | 40C |       |       |      | LowEfficiency, CtIsSmall, Ci |
| speA         | 40C |       |       |      | LowEfficiency, CtIsSmall, Ci |
| str          | 40C |       |       |      | LowEfficiency, CtIsSmall, Ci |
| strA         | 40C |       |       |      | LowEfficiency, CtIsSmall, Ci |
| strB         | 40C | 33.93 | 79.02 | 1.93 |                              |
| sul1         | 40C |       |       |      | NoAmplification              |
| sul2         | 40C | 29.88 | 85.67 | 2.01 |                              |
| sulA/foIP-01 | 40C | 20.51 | 80.66 | 2.03 |                              |
| sulA/foIP-03 | 40C | 17.72 | 83.23 | 2.02 |                              |
| tet(32)      | 40C | 24.48 | 81.27 | 2    |                              |
| tet(34)      | 40C | 32.57 | 75.32 | 1.99 |                              |
| tet(35)      | 40C |       |       |      | NoAmplification              |
| tet(36)-A    | 40C |       |       |      | CurveFitFailed               |
| tet(36)-B    | 40C |       |       |      | LowEfficiency, CtIsSmall, Ci |
| tet(37)      | 40C | 22.57 | 76.45 | 2.03 |                              |
| tetA-01      | 40C | 29.98 | 85.16 | 1.97 |                              |
| tetA-02      | 40C |       |       |      | CurveFitFailed               |
| tetB-01      | 40C | 34.04 | 86.38 | 2.01 |                              |
| tetB-02      | 40C |       |       |      | LowEfficiency, CtIsSmall, Ci |
| tetC-01      | 40C |       |       |      | NoAmplification              |
| tetC-02      | 40C |       |       |      | LowEfficiency, CtIsSmall, S  |
| tetD-01      | 40C |       |       |      | LowEfficiency, CtIsSmall, Ci |
| tetD-02      | 40C |       |       |      | CurveFitFailed               |
| tetE         | 40C |       |       |      | LowEfficiency, CtIsSmall, Ci |
| tetG-01      | 40C | 35.32 | 82.33 | 1.92 |                              |
| tetG-02      | 40C | 35.01 | 89.13 | 1.88 | MultipleMeltPeaks            |
| tetH         | 40C |       |       |      | LowEfficiency, CtIsSmall, Ci |
| tetJ         | 40C |       |       |      | LowEfficiency, CtIsSmall, Ci |
| tetK         | 40C |       |       |      | CurveFitFailed               |
| tetL-01      | 40C |       |       |      | LowEfficiency, CtIsSmall, Ci |
| tetL-02      | 40C | 36.16 | 85.32 | 1.7  |                              |
| tetM-01      | 40C | 16.9  | 75.94 | 2.12 |                              |
| tetM-02      | 40C | 16.73 | 77.63 | 2.09 |                              |
| tetO-01      | 40C |       |       |      | CurveFitFailed               |
| tetPA        | 40C |       |       |      | LowEfficiency, CtIsSmall, Ci |
| tetPB-01     | 40C |       |       |      | CurveFitFailed               |
| tetPB-02     | 40C | 31.01 | 84.81 | 2.03 |                              |
| tetPB-03     | 40C |       |       |      | LowEfficiency, CtIsSmall, Ci |
| tetPB-05     | 40C |       |       |      | LowEfficiency, CtIsSmall, Ci |
| tetQ         | 40C | 20.84 | 77.29 | 2.1  |                              |
| tetR-02      | 40C | 31.73 | 90.17 | 1.62 |                              |
| tetR-03      | 40C |       |       |      | LowEfficiency, CtIsSmall, Ci |
| tetS         | 40C |       |       |      | CurveFitFailed               |

|             |     |       |       |      |                                          |
|-------------|-----|-------|-------|------|------------------------------------------|
| tetT        | 40C |       |       |      | CurveFitFailed                           |
| tetU-01     | 40C |       |       |      | LowEfficiency, CtIsSmall, Ci             |
| tetV        | 40C |       |       |      | CurveFitFailed                           |
| tetW-01     | 40C | 22.13 | 81.54 | 2.15 |                                          |
| tetX        | 40C |       |       |      | LowEfficiency, CtIsSmall, Ci             |
| tnpA-01     | 40C |       |       |      | LowEfficiency, CtIsSmall, Ci             |
| tnpA-02     | 40C |       |       |      | LowEfficiency, CtIsSmall, S <sub>e</sub> |
| tnpA-03     | 40C | 28.34 | 77.03 | 1.84 |                                          |
| tnpA-04     | 40C |       |       |      | LowEfficiency, CtIsSmall, Ci             |
| tnpA-05     | 40C | 29.73 | 80.7  | 1.89 |                                          |
| tnpA-07     | 40C |       |       |      | LowEfficiency, CtIsSmall, Ci             |
| tolC-01     | 40C |       |       |      | LowEfficiency, CtIsSmall, S <sub>e</sub> |
| tolC-02     | 40C | 31.66 | 89.12 | 2.03 | MultipleMeltPeaks                        |
| tolC-03     | 40C | 30.22 | 85.68 | 1.98 |                                          |
| Tp614       | 40C | 36.25 | 71.7  | 1.95 |                                          |
| ttgA        | 40C |       |       |      | CurveFitFailed                           |
| ttgB        | 40C | 35.04 | 90.3  | 1.92 |                                          |
| vanA        | 40C |       |       |      | LowEfficiency, CtIsSmall, Ci             |
| vanB-01     | 40C | 33.47 | 89.43 | 1.36 | MultipleMeltPeaks                        |
| vanC-01     | 40C |       |       |      | LowEfficiency, CtIsSmall, Ci             |
| vanC-02     | 40C |       |       |      | LowEfficiency, CtIsSmall, Ci             |
| vanC-03     | 40C | 28.84 | 91.53 | 1.94 | MultipleMeltPeaks                        |
| vanC1       | 40C |       |       |      | LowEfficiency, CtIsSmall, Ci             |
| vanC2/vanC3 | 40C | 33.42 | 84.78 | 1.87 |                                          |
| vanG        | 40C |       |       |      | BadR2, CtIsSmall, Saturatio              |
| vanHB       | 40C | 33.92 | 82.9  | 1.9  |                                          |
| vanHD       | 40C |       |       |      | LowEfficiency, CtIsSmall, Ci             |
| vanRA-01    | 40C |       |       |      | CurveFitFailed                           |
| vanRA-02    | 40C |       |       |      | LowEfficiency, CtIsSmall, Ci             |
| vanRB       | 40C |       |       |      | LowEfficiency, CtIsSmall, S <sub>e</sub> |
| vanRC       | 40C |       |       |      | LowEfficiency, CtIsSmall, Ci             |
| vanRC4      | 40C |       |       |      | LowEfficiency, CtIsSmall, Ci             |
| vanRD       | 40C |       |       |      | BadR2, CtIsSmall, Saturatio              |
| vanSA       | 40C |       |       |      | CurveFitFailed                           |
| vanSB       | 40C | 31.29 | 73.77 | 1.78 | MultipleMeltPeaks                        |
| vanSC-01    | 40C | 32.44 | 83.99 | 1.72 |                                          |
| vanSC-02    | 40C |       |       |      | NoAmplification                          |
| vanTC-01    | 40C |       |       |      | LowEfficiency, CtIsSmall, S <sub>e</sub> |
| vanTC-02    | 40C |       |       |      | LowEfficiency, CtIsSmall, Ci             |
| vanTE       | 40C |       |       |      | LowEfficiency, CtIsSmall, Ci             |
| vanTG       | 40C |       |       |      | LowEfficiency, CtIsSmall, S <sub>e</sub> |
| vanWB       | 40C |       |       |      | LowEfficiency, CtIsSmall, Ci             |
| vanWG       | 40C |       |       |      | LowEfficiency, CtIsSmall, Ci             |
| vanXA       | 40C |       |       |      | LowEfficiency, CtIsSmall, S <sub>e</sub> |
| vanXB       | 40C |       |       |      | NoAmplification                          |
| vanXD       | 40C | 32.05 | 74.73 | 2.04 |                                          |

|              |     |       |       |      |                              |
|--------------|-----|-------|-------|------|------------------------------|
| vanYB        | 40C |       |       |      | LowEfficiency, CtIsSmall, Ci |
| vanYD-01     | 40C |       |       |      | CurveFitFailed               |
| vanYD-02     | 40C |       |       |      | LowEfficiency, CtIsSmall, Ci |
| vatB-01      | 40C |       |       |      | LowEfficiency, CtIsSmall, Ci |
| vatB-02      | 40C |       |       |      | CurveFitFailed               |
| vatC-01      | 40C |       |       |      | LowEfficiency, CtIsSmall, S: |
| vatC-02      | 40C |       |       |      | CurveFitFailed               |
| vatE-01      | 40C | 32.1  | 74.79 | 2.06 |                              |
| vatE-02      | 40C |       |       |      | LowEfficiency, CtIsSmall, Ci |
| vgaA-01      | 40C |       |       |      | CurveFitFailed               |
| vgaA-02      | 40C |       |       |      | CurveFitFailed               |
| vgb-01       | 40C |       |       |      | LowEfficiency, CtIsSmall, S: |
| vgbB-01      | 40C |       |       |      | LowEfficiency, CtIsSmall, Ci |
| vgbB-02      | 40C |       |       |      | LowEfficiency, CtIsSmall, Ci |
| yceE/mdtG-0  | 40C |       |       |      | LowEfficiency, CtIsSmall, S: |
| yceE/mdtG-0  | 40C |       |       |      | CurveFitFailed               |
| yceL/mdtH-0  | 40C | 35.92 | 84.33 | 1.81 | MultipleMeltPeaks            |
| yceL/mdtH-0  | 40C |       |       |      | LowEfficiency, CtIsSmall, Ci |
| yceL/mdtH-0  | 40C |       |       |      | CurveFitFailed               |
| yidY/mdtL-01 | 40C | 32.98 | 80.13 | 2.03 | MultipleMeltPeaks            |
| yidY/mdtL-02 | 40C |       |       |      | CurveFitFailed               |































| Assay          | Sample | Ct | Tm    | Efficiency | flag                         |
|----------------|--------|----|-------|------------|------------------------------|
| 16S rRNA       | 41A    |    | 15.96 | 82.07      | 1.99                         |
| aac            | 41A    |    | 31.1  | 80.99      | 2.11                         |
| aac(6')-Ib(akz | 41A    |    |       |            | CurveFitFailed               |
| aac(6')-Ib(akz | 41A    |    | 28.86 | 87.02      | 1.92 MultipleMeltPeaks       |
| aac(6')-Ib(akz | 41A    |    | 33.47 | 86         | 1.9 MultipleMeltPeaks        |
| aac(6')-II     | 41A    |    | 38.24 | 80.82      | 1.53                         |
| aac(6')I1      | 41A    |    | 40.58 | 85.56      | 1.7                          |
| aacA/aphD      | 41A    |    |       |            | CurveFitFailed               |
| aacC           | 41A    |    | 32.63 | 85.65      | 1.87                         |
| aacC1          | 41A    |    |       |            | NoAmplification              |
| aacC2          | 41A    |    |       |            | NoAmplification              |
| aacC4          | 41A    |    | 37.34 | 78.59      | 1.83 MultipleMeltPeaks       |
| aadA-01        | 41A    |    |       |            | NoAmplification              |
| aadA-02        | 41A    |    | 33.22 | 80.16      | 1.93                         |
| aadA-1-01      | 41A    |    | 35.29 | 85.42      | 1.82 MultipleMeltPeaks       |
| aadA-1-02      | 41A    |    |       |            | CurveFitFailed               |
| aadA1          | 41A    |    | 37.45 | 83.42      | 1.84 MultipleMeltPeaks       |
| aadA2-01       | 41A    |    | 39.86 | 83.16      | 1.63                         |
| aadA2-02       | 41A    |    | 33.73 | 75.18      | 1.97                         |
| aadA2-03       | 41A    |    | 32.71 | 81.51      | 1.89                         |
| aadA5-01       | 41A    |    | 35.67 | 88.3       | 1.77 MultipleMeltPeaks       |
| aadA5-02       | 41A    |    | 30.35 | 82.58      | 2.03 MultipleMeltPeaks       |
| aadA9-01       | 41A    |    |       |            | LowEfficiency, CtIsSmall, Ci |
| aadA9-02       | 41A    |    |       |            | NoAmplification              |
| aadD           | 41A    |    |       |            | NoAmplification              |
| aadE           | 41A    |    |       |            | NoAmplification              |
| acrA-01        | 41A    |    | 32.97 | 88.41      | 1.89                         |
| acrA-02        | 41A    |    | 38.92 | 87.03      | 1.74                         |
| acrA-03        | 41A    |    |       |            | BadR2, LowEfficiency, CtIsS  |
| acrA-04        | 41A    |    | 28.99 | 80.38      | 2.01                         |
| acrA-05        | 41A    |    | 30.39 | 80.01      | 1.93 MultipleMeltPeaks       |
| acrB-01        | 41A    |    |       |            | NoAmplification              |
| acrF           | 41A    |    | 28.27 | 82.89      | 1.84                         |
| acrR-01        | 41A    |    | 36.56 | 78.3       | 1.89 MultipleMeltPeaks       |
| acrR-02        | 41A    |    | 37.11 | 85.19      | 1.77                         |
| Actin          | 41A    |    | 23.14 | 86.93      | 1.94 MultipleMeltPeaks       |
| adeA           | 41A    |    |       |            | NoAmplification              |
| ampC-01        | 41A    |    | 31.91 | 81.87      | 2.03                         |
| ampC-02        | 41A    |    |       |            | NoAmplification              |
| ampC-04        | 41A    |    | 29.9  | 83.91      | 1.95                         |
| ampC-05        | 41A    |    |       |            | NoAmplification              |
| ampC-06        | 41A    |    | 36.45 | 83.17      | 1.81 MultipleMeltPeaks       |
| ampC-07        | 41A    |    | 31.4  | 82.33      | 1.89 MultipleMeltPeaks       |
| ampC-09        | 41A    |    |       |            | CurveFitFailed               |
| ampC/blaDH     | 41A    |    | 30.9  | 83.72      | 1.98                         |

|                          |     |       |       |      |                                           |
|--------------------------|-----|-------|-------|------|-------------------------------------------|
| aph                      | 41A |       |       |      | NoAmplification                           |
| aph(2')-Id-01            | 41A |       |       |      | NoAmplification                           |
| aph(2')-Id-02            | 41A |       |       |      | NoAmplification                           |
| aph6ia                   | 41A |       |       |      | BadR2, HighEfficiency, Ctlis'             |
| aphA1(aka k <sub>z</sub> | 41A |       |       |      | LowEfficiency, CtlisSmall, Ci             |
| bacA-01                  | 41A |       |       |      | CurveFitFailed                            |
| bacA-02                  | 41A | 37.17 | 83.23 | 1.68 | MultipleMeltPeaks                         |
| BETA-globin              | 41A | 24.39 | 83.9  | 1.99 |                                           |
| bla-ACC-1                | 41A | 34.86 | 79.2  | 1.82 | MultipleMeltPeaks                         |
| bla-L1                   | 41A | 30.85 | 84.87 | 1.93 |                                           |
| bla1                     | 41A |       |       |      | LowEfficiency, CtlisSmall, S <sub>c</sub> |
| blaCMY                   | 41A | 34.93 | 80.34 | 1.89 |                                           |
| blaCMY2-01               | 41A | 27.15 | 83    | 2.04 |                                           |
| blaCMY2-02               | 41A | 29.04 | 85.3  | 1.92 |                                           |
| blaCTX-M-01              | 41A | 38.38 | 75.94 | 1.9  |                                           |
| blaCTX-M-02              | 41A | 29.46 | 89.22 | 1.89 |                                           |
| blaCTX-M-03              | 41A |       |       |      | LowEfficiency, CtlisSmall, Ci             |
| blaCTX-M-04              | 41A | 31.54 | 78.44 | 1.96 |                                           |
| blaCTX-M-05              | 41A | 32.62 | 75.86 | 1.74 |                                           |
| blaCTX-M-06              | 41A |       |       |      | NoAmplification                           |
| blaGES                   | 41A |       |       |      | NoAmplification                           |
| blaIMP-01                | 41A |       |       |      | BadR2, LowEfficiency, CtlisS              |
| blaIMP-02                | 41A |       |       |      | LowEfficiency, CtlisSmall, Ci             |
| blaMOX/blaC              | 41A | 39.05 | 61.88 | 1.89 | MultipleMeltPeaks                         |
| blaOCH                   | 41A |       |       |      | NoAmplification                           |
| blaOKP                   | 41A |       |       |      | BadR2, CtlisSmall, Saturatio              |
| blaOXA1/blaC             | 41A |       |       |      | CurveFitFailed                            |
| blaOXA10-01              | 41A | 37.85 | 83.29 | 1.83 |                                           |
| blaOXA10-02              | 41A |       |       |      | BadR2, LowEfficiency, CtlisS              |
| blaOXY                   | 41A | 30.53 | 89.9  | 1.85 |                                           |
| blaPAO                   | 41A |       |       |      | NoAmplification                           |
| blaPER                   | 41A | 39.28 | 74.94 | 1.63 | MultipleMeltPeaks                         |
| blaPSE                   | 41A |       |       |      | NoAmplification                           |
| blaROB                   | 41A | 38.14 | 81.56 | 1.72 |                                           |
| blaSFO                   | 41A | 30.9  | 82.8  | 1.92 | MultipleMeltPeaks                         |
| blaSHV-01                | 41A | 31.76 | 87.42 | 2.06 | MultipleMeltPeaks                         |
| blaSHV-02                | 41A |       |       |      | CurveFitFailed                            |
| blaTEM                   | 41A |       |       |      | NoAmplification                           |
| blaTLA                   | 41A |       |       |      | CurveFitFailed                            |
| blaVEB                   | 41A |       |       |      | NoAmplification                           |
| blaVIM                   | 41A |       |       |      | NoAmplification                           |
| blaZ                     | 41A | 29.2  | 73.82 | 2    |                                           |
| carB                     | 41A |       |       |      | CurveFitFailed                            |
| catA1                    | 41A |       |       |      | NoAmplification                           |
| catB3                    | 41A |       |       |      | NoAmplification                           |
| catB8                    | 41A | 29.42 | 82.35 | 1.95 |                                           |

|            |     |       |       |      |                             |
|------------|-----|-------|-------|------|-----------------------------|
| ceoA       | 41A | 32.6  | 82.27 | 1.89 |                             |
| cepA       | 41A |       |       |      | NoAmplification             |
| cfiA       | 41A | 30.79 | 86.33 | 1.94 |                             |
| cfr        | 41A |       |       |      | NoAmplification             |
| cfxA       | 41A | 24.47 | 77.58 | 2.07 |                             |
| cmeA       | 41A |       |       |      | BadR2, LowEfficiency, CtIsS |
| cmlA1-01   | 41A |       |       |      | NoAmplification             |
| cmlA1-02   | 41A |       |       |      | NoAmplification             |
| cmr        | 41A |       |       |      | CurveFitFailed              |
| cmx(A)     | 41A | 28.9  | 84.21 | 1.97 |                             |
| cphA-01    | 41A | 29.17 | 85.38 | 1.97 | MultipleMeltPeaks           |
| cphA-02    | 41A | 30.05 | 82.4  | 1.92 |                             |
| dfrA1      | 41A | 38.09 | 78.68 | 1.86 |                             |
| dfrA12     | 41A |       |       |      | CurveFitFailed              |
| emrD       | 41A | 30.55 | 89.12 | 2    |                             |
| ereA       | 41A | 36.74 | 82.46 | 1.84 |                             |
| ereB       | 41A | 32.97 | 85.7  | 1.93 |                             |
| erm(34)    | 41A |       |       |      | NoAmplification             |
| erm(35)    | 41A |       |       |      | CurveFitFailed              |
| erm(36)    | 41A | 33.41 | 87.67 | 1.86 |                             |
| ermA       | 41A |       |       |      | LowEfficiency, CtIsSmall, S |
| ermA/ermTR | 41A |       |       |      | NoAmplification             |
| ermB       | 41A |       |       |      | LowEfficiency, CtIsSmall, C |
| ermC       | 41A |       |       |      | CurveFitFailed              |
| ermF       | 41A |       |       |      | NoAmplification             |
| ermJ/ermD  | 41A |       |       |      | BadR2, LowEfficiency, CtIsS |
| ermK-01    | 41A | 37.29 | 79.1  | 2.38 | MultipleMeltPeaks           |
| ermK-02    | 41A | 31.24 | 82.12 | 1.92 | MultipleMeltPeaks           |
| ermT-01    | 41A |       |       |      | BadR2, LowEfficiency, CtIsS |
| ermT-02    | 41A |       |       |      | CurveFitFailed              |
| ermX       | 41A | 29.46 | 83.49 | 1.9  |                             |
| ermY       | 41A |       |       |      | LowEfficiency, CtIsSmall, C |
| fabK       | 41A | 20.31 | 79.03 | 2.1  |                             |
| floR       | 41A |       |       |      | NoAmplification             |
| folA       | 41A |       |       |      | NoAmplification             |
| fosB       | 41A |       |       |      | LowEfficiency, CtIsSmall, S |
| fosX       | 41A |       |       |      | LowEfficiency, CtIsSmall, C |
| fox5       | 41A | 25.81 | 86.19 | 1.95 | MultipleMeltPeaks           |
| imiR       | 41A |       |       |      | CurveFitFailed              |
| ImrA-01    | 41A |       |       |      | NoAmplification             |
| intl       | 41A | 30.71 | 84.33 | 1.96 |                             |
| intl1      | 41A | 21.06 | 87.1  | 1.96 |                             |
| IS613      | 41A | 21.92 | 79.66 | 2    |                             |
| lnuA-01    | 41A |       |       |      | LowEfficiency, CtIsSmall, C |
| lnuB-01    | 41A |       |       |      | NoAmplification             |
| lnuB-02    | 41A |       |       |      | NoAmplification             |

|                |     |       |       |      |                              |
|----------------|-----|-------|-------|------|------------------------------|
| lnuC           | 41A | 33.69 | 88.22 | 1.85 |                              |
| marR-01        | 41A | 37.95 | 81.22 | 1.7  | MultipleMeltPeaks            |
| matA/mel       | 41A | 18.45 | 77.72 | 2.06 |                              |
| mdetI1         | 41A |       |       |      | CurveFitFailed               |
| mdtA           | 41A | 37.36 | 62.94 | 2.04 | BadR2, MultipleMeltPeaks     |
| mdtE/yhiU      | 41A | 44.56 | 78.42 | 1.71 |                              |
| mecA           | 41A |       |       |      | CurveFitFailed               |
| mefA           | 41A | 17.51 | 80.45 | 2.03 |                              |
| mepA           | 41A | 29.22 | 88.05 | 1.94 |                              |
| mexA           | 41A |       |       |      | NoAmplification              |
| mexD           | 41A | 34.89 | 79.89 | 1.97 |                              |
| mexE           | 41A | 39.06 | 83.53 | 1.71 |                              |
| mexF           | 41A | 26.14 | 87.24 | 1.99 |                              |
| mphA-01        | 41A | 30.96 | 91.15 | 1.97 |                              |
| mphA-02        | 41A | 29.55 | 89.13 | 2.19 |                              |
| mphB           | 41A |       |       |      | BadR2, LowEfficiency, CtIsS  |
| mphC           | 41A |       |       |      | CurveFitFailed               |
| msrA-01        | 41A |       |       |      | CurveFitFailed               |
| msrC-01        | 41A |       |       |      | NoAmplification              |
| mtrC-01        | 41A | 30.5  | 83.33 | 1.9  |                              |
| mtrC-02        | 41A | 31.69 | 84.31 | 1.94 |                              |
| mtrD-02        | 41A | 26.91 | 85.12 | 2.04 | MultipleMeltPeaks            |
| mtrD-03        | 41A | 34.01 | 89.03 | 1.82 |                              |
| NDM1           | 41A | 34.62 | 84.67 | 1.9  |                              |
| nimE           | 41A | 30.67 | 76.75 | 2.03 |                              |
| nisB           | 41A |       |       |      | NoAmplification              |
| oleC           | 41A | 34.65 | 88.72 | 1.85 |                              |
| oprD           | 41A | 29.84 | 87.97 | 1.93 |                              |
| oprJ           | 41A | 31.86 | 88.35 | 1.93 |                              |
| pbp            | 41A |       |       |      | LowEfficiency, CtIsSmall, Ci |
| pbp2x          | 41A |       |       |      | NoAmplification              |
| Pbp5           | 41A |       |       |      | NoAmplification              |
| penA           | 41A |       |       |      | NoAmplification              |
| pikR1          | 41A | 40.42 | 61.61 | 1.72 | MultipleMeltPeaks            |
| pikR2          | 41A | 30.77 | 85.85 | 2.04 |                              |
| pmrA           | 41A | 20.24 | 79.64 | 2.06 |                              |
| pncA           | 41A | 27.5  | 89.81 | 1.86 |                              |
| putative multi | 41A | 31.34 | 84.05 | 1.95 |                              |
| qac            | 41A | 42.01 | 69.38 | 1.62 | MultipleMeltPeaks            |
| qacA           | 41A | 32.04 | 76.5  | 2    |                              |
| qacA/qacB      | 41A |       |       |      | CurveFitFailed               |
| qacEdelta1-0   | 41A |       |       |      | BadR2, LowEfficiency, CtIsS  |
| qacEdelta1-0   | 41A | 33.88 | 80.38 | 1.9  |                              |
| qacH-01        | 41A | 31.48 | 85.52 | 2.01 |                              |
| qacH-02        | 41A | 37.77 | 83.89 | 1.61 |                              |
| qnrA           | 41A | 38.78 | 80.2  | 1.78 | MultipleMeltPeaks            |

|              |     |       |       |      |                              |
|--------------|-----|-------|-------|------|------------------------------|
| rarD-02      | 41A |       |       |      | NoAmplification              |
| sat4         | 41A |       |       |      | LowEfficiency, CtIsSmall, Ci |
| sdeB         | 41A |       |       |      | LowEfficiency, CtIsSmall, Ci |
| spcN-01      | 41A |       |       |      | NoAmplification              |
| speA         | 41A |       |       |      | NoAmplification              |
| str          | 41A |       |       |      | CurveFitFailed               |
| strA         | 41A |       |       |      | CurveFitFailed               |
| strB         | 41A | 28.37 | 84.03 | 1.94 |                              |
| sul1         | 41A | 34.96 | 89.22 | 1.74 | MultipleMeltPeaks            |
| sul2         | 41A | 29.48 | 85.65 | 1.96 |                              |
| sulA/foIP-01 | 41A | 17.66 | 80.9  | 2    |                              |
| sulA/foIP-03 | 41A | 18.27 | 82.86 | 1.98 |                              |
| tet(32)      | 41A |       |       |      | NoAmplification              |
| tet(34)      | 41A | 35.27 | 74.88 | 1.92 |                              |
| tet(35)      | 41A |       |       |      | NoAmplification              |
| tet(36)-A    | 41A |       |       |      | NoAmplification              |
| tet(36)-B    | 41A |       |       |      | NoAmplification              |
| tet(37)      | 41A |       |       |      | BadR2, CtIsSmall, CurveFit   |
| tetA-01      | 41A | 34.02 | 65.41 | 1.92 | MultipleMeltPeaks            |
| tetA-02      | 41A | 31.8  | 78.08 | 2.02 | MultipleMeltPeaks            |
| tetB-01      | 41A | 33.34 | 88    | 1.9  | MultipleMeltPeaks            |
| tetB-02      | 41A | 33.39 | 76.11 | 1.94 |                              |
| tetC-01      | 41A |       |       |      | NoAmplification              |
| tetC-02      | 41A |       |       |      | NoAmplification              |
| tetD-01      | 41A |       |       |      | LowEfficiency, CtIsSmall, Ci |
| tetD-02      | 41A | 36.43 | 76.76 | 1.91 |                              |
| tetE         | 41A |       |       |      | NoAmplification              |
| tetG-01      | 41A | 33.7  | 82.38 | 1.9  |                              |
| tetG-02      | 41A | 36.34 | 82.47 | 1.81 |                              |
| tetH         | 41A |       |       |      | NoAmplification              |
| tetJ         | 41A |       |       |      | CurveFitFailed               |
| tetK         | 41A |       |       |      | CurveFitFailed               |
| tetL-01      | 41A | 34.18 | 81.02 | 1.8  |                              |
| tetL-02      | 41A | 34.39 | 85.27 | 1.76 |                              |
| tetM-01      | 41A | 22.59 | 76.35 | 2    |                              |
| tetM-02      | 41A | 22.83 | 77.75 | 2    |                              |
| tetO-01      | 41A |       |       |      | CurveFitFailed               |
| tetPA        | 41A |       |       |      | NoAmplification              |
| tetPB-01     | 41A |       |       |      | NoAmplification              |
| tetPB-02     | 41A | 28.99 | 84.8  | 1.94 |                              |
| tetPB-03     | 41A |       |       |      | CurveFitFailed               |
| tetPB-05     | 41A |       |       |      | LowEfficiency, CtIsSmall, Ci |
| tetQ         | 41A |       |       |      | NoAmplification              |
| tetR-02      | 41A | 31.23 | 80.17 | 2    | MultipleMeltPeaks            |
| tetR-03      | 41A |       |       |      | NoAmplification              |
| tetS         | 41A |       |       |      | BadR2, LowEfficiency, CtIsS  |

|             |     |       |       |      |                              |
|-------------|-----|-------|-------|------|------------------------------|
| tetT        | 41A |       |       |      | NoAmplification              |
| tetU-01     | 41A |       |       |      | NoAmplification              |
| tetV        | 41A |       |       |      | NoAmplification              |
| tetW-01     | 41A | 23.2  | 81.67 | 1.98 |                              |
| tetX        | 41A |       |       |      | NoAmplification              |
| tnpA-01     | 41A |       |       |      | CurveFitFailed               |
| tnpA-02     | 41A | 33.24 | 84.98 | 1.79 |                              |
| tnpA-03     | 41A | 37.18 | 75.06 | 1.91 |                              |
| tnpA-04     | 41A | 38.11 | 78.38 | 1.8  |                              |
| tnpA-05     | 41A | 28.22 | 80.79 | 1.94 |                              |
| tnpA-07     | 41A |       |       |      | NoAmplification              |
| tolC-01     | 41A |       |       |      | NoAmplification              |
| tolC-02     | 41A | 32.45 | 83.93 | 1.91 |                              |
| tolC-03     | 41A | 30.97 | 87.89 | 1.96 |                              |
| Tp614       | 41A | 31.07 | 81.9  | 1.94 |                              |
| ttgA        | 41A |       |       |      | NoAmplification              |
| ttgB        | 41A | 35.26 | 84.88 | 1.88 |                              |
| vanA        | 41A |       |       |      | NoAmplification              |
| vanB-01     | 41A | 31.27 | 83.01 | 2.04 |                              |
| vanC-01     | 41A | 40.48 | 75.95 | 1.8  |                              |
| vanC-02     | 41A |       |       |      | CurveFitFailed               |
| vanC-03     | 41A | 27.25 | 84.84 | 1.96 | MultipleMeltPeaks            |
| vanC1       | 41A |       |       |      | CurveFitFailed               |
| vanC2/vanC3 | 41A | 33.94 | 83.02 | 1.95 |                              |
| vanG        | 41A |       |       |      | BadR2, CtIsSmall, Saturatio  |
| vanHB       | 41A |       |       |      | NoAmplification              |
| vanHD       | 41A | 33.16 | 82.81 | 1.93 | MultipleMeltPeaks            |
| vanRA-01    | 41A |       |       |      | NoAmplification              |
| vanRA-02    | 41A |       |       |      | NoAmplification              |
| vanRB       | 41A | 31.96 | 75.72 | 2.01 |                              |
| vanRC       | 41A |       |       |      | LowEfficiency, CtIsSmall, Ci |
| vanRC4      | 41A |       |       |      | LowEfficiency, CtIsSmall, Ci |
| vanRD       | 41A | 37.25 | 73.27 | 2.4  | BadR2                        |
| vanSA       | 41A |       |       |      | CurveFitFailed               |
| vanSB       | 41A | 29.64 | 74.8  | 2.09 |                              |
| vanSC-01    | 41A | 36.83 | 77.98 | 1.83 |                              |
| vanSC-02    | 41A |       |       |      | NoAmplification              |
| vanTC-01    | 41A |       |       |      | LowEfficiency, CtIsSmall, Ci |
| vanTC-02    | 41A | 29.75 | 86    | 1.84 |                              |
| vanTE       | 41A | 37.06 | 88.45 | 1.7  |                              |
| vanTG       | 41A |       |       |      | NoAmplification              |
| vanWB       | 41A |       |       |      | NoAmplification              |
| vanWG       | 41A | 37.02 | 74.19 | 1.89 |                              |
| vanXA       | 41A |       |       |      | NoAmplification              |
| vanXB       | 41A |       |       |      | NoAmplification              |
| vanXD       | 41A | 32.16 | 75.07 | 2.02 |                              |

|              |     |       |       |      |                             |
|--------------|-----|-------|-------|------|-----------------------------|
| vanYB        | 41A | 36.8  | 82.73 | 1.85 | MultipleMeltPeaks           |
| vanYD-01     | 41A | 32.46 | 86.4  | 1.87 |                             |
| vanYD-02     | 41A |       |       |      | NoAmplification             |
| vatB-01      | 41A |       |       |      | BadR2, LowEfficiency, CtIs5 |
| vatB-02      | 41A | 36.91 | 80.84 | 1.78 |                             |
| vatC-01      | 41A | 38.9  | 72.7  | 1.78 | MultipleMeltPeaks           |
| vatC-02      | 41A |       |       |      | CurveFitFailed              |
| vatE-01      | 41A | 29.31 | 77.3  | 2.13 |                             |
| vatE-02      | 41A | 36.39 | 75.74 | 1.98 |                             |
| vgaA-01      | 41A |       |       |      | CurveFitFailed              |
| vgaA-02      | 41A | 38.29 | 72.86 | 1.84 |                             |
| vgb-01       | 41A | 39.19 | 78.44 | 1.71 |                             |
| vgbB-01      | 41A |       |       |      | CurveFitFailed              |
| vgbB-02      | 41A |       |       |      | BadR2, LowEfficiency, CtIs5 |
| yceE/mdtG-0  | 41A |       |       |      | CurveFitFailed              |
| yceE/mdtG-0  | 41A |       |       |      | NoAmplification             |
| yceL/mdtH-0  | 41A | 30.9  | 88.29 | 1.91 |                             |
| yceL/mdtH-0  | 41A |       |       |      | NoAmplification             |
| yceL/mdtH-0  | 41A | 31.62 | 80.51 | 1.97 |                             |
| yidY/mdtL-01 | 41A | 30.99 | 81.62 | 1.96 |                             |
| yidY/mdtL-02 | 41A |       |       |      | CurveFitFailed              |































| Assay          | Sample | Ct | Tm    | Efficiency | flag                         |
|----------------|--------|----|-------|------------|------------------------------|
| 16S rRNA       | 41B    |    | 15.37 | 82.19      | 1.96                         |
| aac            | 41B    |    | 30.2  | 82.92      | 2.04 MultipleMeltPeaks       |
| aac(6')-Ib(akz | 41B    |    |       |            | NoAmplification              |
| aac(6')-Ib(akz | 41B    |    | 29.23 | 85.98      | 1.94 MultipleMeltPeaks       |
| aac(6')-Ib(akz | 41B    |    | 33.18 | 76.26      | 1.93 MultipleMeltPeaks       |
| aac(6')-II     | 41B    |    | 33.32 | 83.92      | 1.84 MultipleMeltPeaks       |
| aac(6')I1      | 41B    |    | 38.31 | 89.48      | 1.76 MultipleMeltPeaks       |
| aacA/aphD      | 41B    |    |       |            | LowEfficiency, CtIsSmall, Ci |
| aacC           | 41B    |    | 29.44 | 91.78      | 1.95                         |
| aacC1          | 41B    |    |       |            | CurveFitFailed               |
| aacC2          | 41B    |    |       |            | NoAmplification              |
| aacC4          | 41B    |    | 34.13 | 87.59      | 1.83                         |
| aadA-01        | 41B    |    |       |            | NoAmplification              |
| aadA-02        | 41B    |    | 34.66 | 80.33      | 1.86                         |
| aadA-1-01      | 41B    |    | 33.28 | 81.33      | 1.86 MultipleMeltPeaks       |
| aadA-1-02      | 41B    |    |       |            | CurveFitFailed               |
| aadA1          | 41B    |    | 34.93 | 84.74      | 1.8                          |
| aadA2-01       | 41B    |    | 33.9  | 84.64      | 1.81 MultipleMeltPeaks       |
| aadA2-02       | 41B    |    | 34.12 | 75.15      | 1.95                         |
| aadA2-03       | 41B    |    |       |            | NoAmplification              |
| aadA5-01       | 41B    |    | 33.94 | 88.43      | 1.91 MultipleMeltPeaks       |
| aadA5-02       | 41B    |    | 34.81 | 77.52      | 1.84 MultipleMeltPeaks       |
| aadA9-01       | 41B    |    |       |            | BadR2, LowEfficiency, CtIsS  |
| aadA9-02       | 41B    |    | 39.19 | 73.94      | 1.85                         |
| aadD           | 41B    |    |       |            | NoAmplification              |
| aadE           | 41B    |    |       |            | NoAmplification              |
| acrA-01        | 41B    |    | 32.13 | 88.88      | 1.9                          |
| acrA-02        | 41B    |    | 31.24 | 88.07      | 1.85                         |
| acrA-03        | 41B    |    | 35.54 | 87.56      | 1.74                         |
| acrA-04        | 41B    |    | 28.69 | 84.27      | 1.97                         |
| acrA-05        | 41B    |    | 30.56 | 87.61      | 1.92                         |
| acrB-01        | 41B    |    | 32.06 | 77.08      | 2.04                         |
| acrF           | 41B    |    | 28.34 | 83.05      | 1.85                         |
| acrR-01        | 41B    |    | 37.69 | 81.2       | 1.76 MultipleMeltPeaks       |
| acrR-02        | 41B    |    | 35.69 | 84.88      | 1.81                         |
| Actin          | 41B    |    | 22    | 86.88      | 1.93                         |
| adeA           | 41B    |    | 36.39 | 78.05      | 1.81 MultipleMeltPeaks       |
| ampC-01        | 41B    |    | 30.46 | 84.86      | 2.06 MultipleMeltPeaks       |
| ampC-02        | 41B    |    | 33.83 | 86.78      | 1.91                         |
| ampC-04        | 41B    |    | 32.69 | 77.02      | 1.83                         |
| ampC-05        | 41B    |    |       |            | NoAmplification              |
| ampC-06        | 41B    |    |       |            | CurveFitFailed               |
| ampC-07        | 41B    |    | 31.74 | 81.14      | 1.91                         |
| ampC-09        | 41B    |    |       |            | CurveFitFailed               |
| ampC/blaDH     | 41B    |    | 30.13 | 84.96      | 1.98                         |

|                          |     |       |       |                              |
|--------------------------|-----|-------|-------|------------------------------|
| aph                      | 41B |       |       | NoAmplification              |
| aph(2')-Id-01            | 41B |       |       | NoAmplification              |
| aph(2')-Id-02            | 41B |       |       | NoAmplification              |
| aph6ia                   | 41B |       |       | NoAmplification              |
| aphA1(aka k <sub>z</sub> | 41B |       |       | NoAmplification              |
| bacA-01                  | 41B | 37.04 | 77.11 | 1.85                         |
| bacA-02                  | 41B | 35.12 | 88.29 | 1.7                          |
| BETA-globin              | 41B | 23.89 | 83.86 | 1.99 MultipleMeltPeaks       |
| bla-ACC-1                | 41B | 34.89 | 81.77 | 1.79 MultipleMeltPeaks       |
| bla-L1                   | 41B | 30.01 | 85.72 | 1.95 MultipleMeltPeaks       |
| bla1                     | 41B |       |       | NoAmplification              |
| blaCMY                   | 41B | 33.68 | 80.48 | 1.92                         |
| blaCMY2-01               | 41B | 28.45 | 83.1  | 2.01                         |
| blaCMY2-02               | 41B | 27.72 | 83.36 | 1.96 MultipleMeltPeaks       |
| blaCTX-M-01              | 41B | 39.91 | 62.56 | 1.7 MultipleMeltPeaks        |
| blaCTX-M-02              | 41B | 29.78 | 83.86 | 1.95 MultipleMeltPeaks       |
| blaCTX-M-03              | 41B |       |       | LowEfficiency, CtlIsSmall, C |
| blaCTX-M-04              | 41B | 29.1  | 88.83 | 1.98                         |
| blaCTX-M-05              | 41B | 32.44 | 76.51 | 1.75                         |
| blaCTX-M-06              | 41B |       |       | NoAmplification              |
| blaGES                   | 41B |       |       | NoAmplification              |
| blaIMP-01                | 41B | 35.62 | 74.62 | 1.87                         |
| blaIMP-02                | 41B | 34.25 | 85.99 | 1.87                         |
| blaMOX/blaC              | 41B | 38.42 | 81.57 | 1.84 MultipleMeltPeaks       |
| blaOCH                   | 41B |       |       | NoAmplification              |
| blaOKP                   | 41B |       |       | NoAmplification              |
| blaOXA1/blaC             | 41B |       |       | NoAmplification              |
| blaOXA10-01              | 41B |       |       | NoAmplification              |
| blaOXA10-02              | 41B | 33.08 | 77.3  | 2.05                         |
| blaOXY                   | 41B | 29.39 | 89.99 | 1.89                         |
| blaPAO                   | 41B | 44.02 | 64.6  | 1.55 MultipleMeltPeaks       |
| blaPER                   | 41B | 37.2  | 70.23 | 1.54                         |
| blaPSE                   | 41B |       |       | NoAmplification              |
| blaROB                   | 41B | 39.09 | 87.42 | 1.75                         |
| blaSFO                   | 41B | 29.98 | 89.66 | 1.92                         |
| blaSHV-01                | 41B | 32.37 | 80.75 | 1.85                         |
| blaSHV-02                | 41B | 34.75 | 81.83 | 1.87                         |
| blaTEM                   | 41B | 31.49 | 83.85 | 2.02                         |
| blaTLA                   | 41B |       |       | NoAmplification              |
| blaVEB                   | 41B |       |       | NoAmplification              |
| blaVIM                   | 41B |       |       | NoAmplification              |
| blaZ                     | 41B |       |       | NoAmplification              |
| carB                     | 41B |       |       | CurveFitFailed               |
| catA1                    | 41B |       |       | NoAmplification              |
| catB3                    | 41B |       |       | NoAmplification              |
| catB8                    | 41B | 28.75 | 82.41 | 1.94 MultipleMeltPeaks       |

|            |     |       |       |      |                              |
|------------|-----|-------|-------|------|------------------------------|
| ceoA       | 41B | 28.31 | 82.23 | 1.94 | MultipleMeltPeaks            |
| cepA       | 41B |       |       |      | NoAmplification              |
| cfiA       | 41B | 30.79 | 87.64 | 1.98 |                              |
| cfr        | 41B |       |       |      | NoAmplification              |
| cfxA       | 41B | 24.17 | 77.6  | 2.09 |                              |
| cmeA       | 41B |       |       |      | LowEfficiency, CtIsSmall, S: |
| cmlA1-01   | 41B | 32.32 | 79.74 | 1.95 | MultipleMeltPeaks            |
| cmlA1-02   | 41B | 38.62 | 61.95 | 1.92 | MultipleMeltPeaks            |
| cmr        | 41B |       |       |      | CurveFitFailed               |
| cmx(A)     | 41B | 27.72 | 84.91 | 2    |                              |
| cphA-01    | 41B | 32.24 | 86.2  | 1.98 | MultipleMeltPeaks            |
| cphA-02    | 41B | 30.4  | 82.24 | 1.93 |                              |
| dfrA1      | 41B | 34.58 | 82.85 | 1.89 |                              |
| dfrA12     | 41B |       |       |      | CurveFitFailed               |
| emrD       | 41B | 30.51 | 89.28 | 1.9  |                              |
| ereA       | 41B |       |       |      | CurveFitFailed               |
| ereB       | 41B | 36.53 | 81.77 | 1.78 | MultipleMeltPeaks            |
| erm(34)    | 41B | 40.6  | 90.36 | 1.68 | MultipleMeltPeaks            |
| erm(35)    | 41B |       |       |      | NoAmplification              |
| erm(36)    | 41B | 36.95 | 82.09 | 1.75 |                              |
| ermA       | 41B |       |       |      | NoAmplification              |
| ermA/ermTR | 41B | 40.48 | 72.09 | 1.83 |                              |
| ermB       | 41B |       |       |      | NoAmplification              |
| ermC       | 41B |       |       |      | NoAmplification              |
| ermF       | 41B |       |       |      | NoAmplification              |
| ermJ/ermD  | 41B |       |       |      | NoAmplification              |
| ermK-01    | 41B | 36.58 | 77.51 | 1.91 |                              |
| ermK-02    | 41B | 37.72 | 84.27 | 1.65 | MultipleMeltPeaks            |
| ermT-01    | 41B |       |       |      | NoAmplification              |
| ermT-02    | 41B |       |       |      | CurveFitFailed               |
| ermX       | 41B | 34.89 | 86.26 | 1.75 | MultipleMeltPeaks            |
| ermY       | 41B |       |       |      | NoAmplification              |
| fabK       | 41B | 19.5  | 79.01 | 2.16 |                              |
| floR       | 41B |       |       |      | NoAmplification              |
| folA       | 41B |       |       |      | NoAmplification              |
| fosB       | 41B |       |       |      | LowEfficiency, CtIsSmall, S: |
| fosX       | 41B |       |       |      | NoAmplification              |
| fox5       | 41B | 26.14 | 86.41 | 1.96 | MultipleMeltPeaks            |
| imiR       | 41B |       |       |      | NoAmplification              |
| ImrA-01    | 41B |       |       |      | NoAmplification              |
| intl       | 41B | 30.19 | 84.86 | 1.96 |                              |
| intl1      | 41B | 20.16 | 87.34 | 1.97 | MultipleMeltPeaks            |
| IS613      | 41B | 21.66 | 79.73 | 2.07 |                              |
| lnuA-01    | 41B |       |       |      | NoAmplification              |
| lnuB-01    | 41B |       |       |      | NoAmplification              |
| lnuB-02    | 41B |       |       |      | BadR2, LowEfficiency, CtIsS  |

|                |     |       |       |      |                            |
|----------------|-----|-------|-------|------|----------------------------|
| lnuC           | 41B |       |       |      | CurveFitFailed             |
| marR-01        | 41B | 33.23 | 85.29 | 1.89 |                            |
| matA/mel       | 41B | 17.86 | 77.81 | 2.07 |                            |
| mdet1          | 41B |       |       |      | CurveFitFailed             |
| mdtA           | 41B |       |       |      | CurveFitFailed             |
| mdtE/yhiU      | 41B | 33.09 | 89.28 | 1.88 |                            |
| mecA           | 41B |       |       |      | NoAmplification            |
| mefA           | 41B | 16.87 | 80.5  | 1.98 | MultipleMeltPeaks          |
| mepA           | 41B | 29.4  | 87.98 | 2.01 |                            |
| mexA           | 41B |       |       |      | CurveFitFailed             |
| mexD           | 41B | 31.9  | 80.12 | 2.03 |                            |
| mexE           | 41B |       |       |      | CurveFitFailed             |
| mexF           | 41B | 26.35 | 87.55 | 2.07 |                            |
| mphA-01        | 41B | 31.37 | 89.41 | 1.95 |                            |
| mphA-02        | 41B | 28.55 | 87.17 | 1.54 |                            |
| mphB           | 41B |       |       |      | BadR2, LowEfficiency, CtIs |
| mphC           | 41B |       |       |      | CurveFitFailed             |
| msrA-01        | 41B |       |       |      | NoAmplification            |
| msrC-01        | 41B |       |       |      | NoAmplification            |
| mtrC-01        | 41B | 30.53 | 83.34 | 1.91 |                            |
| mtrC-02        | 41B | 34.24 | 84.21 | 1.81 |                            |
| mtrD-02        | 41B | 27.86 | 84.77 | 2.01 | MultipleMeltPeaks          |
| mtrD-03        | 41B |       |       |      | CurveFitFailed             |
| NDM1           | 41B | 38.43 | 79.07 | 1.6  | MultipleMeltPeaks          |
| nimE           | 41B |       |       |      | NoAmplification            |
| nisB           | 41B |       |       |      | NoAmplification            |
| oleC           | 41B | 31.4  | 88.78 | 1.9  |                            |
| oprD           | 41B | 28.29 | 89.48 | 1.98 | MultipleMeltPeaks          |
| oprJ           | 41B | 30.03 | 88.22 | 1.93 | MultipleMeltPeaks          |
| pbp            | 41B |       |       |      | CurveFitFailed             |
| pbp2x          | 41B |       |       |      | NoAmplification            |
| Pbp5           | 41B |       |       |      | NoAmplification            |
| penA           | 41B | 38.32 | 87.09 | 1.75 | MultipleMeltPeaks          |
| pikR1          | 41B |       |       |      | NoAmplification            |
| pikR2          | 41B | 31.16 | 88.23 | 2.03 | MultipleMeltPeaks          |
| pmrA           | 41B | 20.76 | 79.69 | 2.11 |                            |
| pncA           | 41B | 24.13 | 89.88 | 1.88 |                            |
| putative multi | 41B | 30.11 | 84.11 | 1.95 |                            |
| qac            | 41B | 36.3  | 78.81 | 1.87 |                            |
| qacA           | 41B |       |       |      | CurveFitFailed             |
| qacA/qacB      | 41B |       |       |      | CurveFitFailed             |
| qacEdelta1-0   | 41B |       |       |      | NoAmplification            |
| qacEdelta1-0   | 41B | 32.11 | 85.09 | 1.97 |                            |
| qacH-01        | 41B | 30.77 | 88.59 | 1.94 |                            |
| qacH-02        | 41B | 34.98 | 83.96 | 1.65 |                            |
| qnrA           | 41B |       |       |      | NoAmplification            |



|              |     |       |       |      |                             |
|--------------|-----|-------|-------|------|-----------------------------|
| rarD-02      | 41B |       |       |      | NoAmplification             |
| sat4         | 41B |       |       |      | NoAmplification             |
| sdeB         | 41B |       |       |      | LowEfficiency, CtIsSmall, S |
| spcN-01      | 41B |       |       |      | NoAmplification             |
| speA         | 41B |       |       |      | NoAmplification             |
| str          | 41B |       |       |      | NoAmplification             |
| strA         | 41B |       |       |      | NoAmplification             |
| strB         | 41B |       |       |      | CurveFitFailed              |
| sul1         | 41B | 32.15 | 89.48 | 1.88 |                             |
| sul2         | 41B | 29.46 | 85.67 | 1.97 |                             |
| sulA/foIP-01 | 41B | 17.04 | 81.07 | 2.01 |                             |
| sulA/foIP-03 | 41B | 17.9  | 82.5  | 1.99 |                             |
| tet(32)      | 41B |       |       |      | NoAmplification             |
| tet(34)      | 41B | 31.25 | 75.88 | 2.02 |                             |
| tet(35)      | 41B |       |       |      | NoAmplification             |
| tet(36)-A    | 41B |       |       |      | NoAmplification             |
| tet(36)-B    | 41B |       |       |      | NoAmplification             |
| tet(37)      | 41B | 37.55 | 80.84 | 1.77 | MultipleMeltPeaks           |
| tetA-01      | 41B | 32.2  | 85.07 | 1.86 |                             |
| tetA-02      | 41B | 41.18 | 79.85 | 1.74 |                             |
| tetB-01      | 41B | 33.89 | 81.71 | 1.89 |                             |
| tetB-02      | 41B | 37.67 | 76.9  | 1.68 |                             |
| tetC-01      | 41B |       |       |      | NoAmplification             |
| tetC-02      | 41B |       |       |      | NoAmplification             |
| tetD-01      | 41B |       |       |      | LowEfficiency, CtIsSmall, C |
| tetD-02      | 41B |       |       |      | NoAmplification             |
| tetE         | 41B |       |       |      | NoAmplification             |
| tetG-01      | 41B | 34.94 | 82.73 | 1.87 |                             |
| tetG-02      | 41B | 35.49 | 87.04 | 1.81 | MultipleMeltPeaks           |
| tetH         | 41B |       |       |      | NoAmplification             |
| tetJ         | 41B |       |       |      | NoAmplification             |
| tetK         | 41B |       |       |      | CurveFitFailed              |
| tetL-01      | 41B |       |       |      | CurveFitFailed              |
| tetL-02      | 41B | 31.91 | 85.03 | 1.8  |                             |
| tetM-01      | 41B | 21.51 | 76.35 | 1.99 |                             |
| tetM-02      | 41B | 21.64 | 77.69 | 2.01 |                             |
| tetO-01      | 41B |       |       |      | CurveFitFailed              |
| tetPA        | 41B |       |       |      | NoAmplification             |
| tetPB-01     | 41B | 41.01 | 64.54 | 1.73 | MultipleMeltPeaks           |
| tetPB-02     | 41B | 28.83 | 84.91 | 1.95 |                             |
| tetPB-03     | 41B |       |       |      | BadR2, LowEfficiency, CtIs  |
| tetPB-05     | 41B |       |       |      | CurveFitFailed              |
| tetQ         | 41B | 31.17 | 74.22 | 2.09 |                             |
| tetR-02      | 41B | 30.84 | 88.7  | 1.93 |                             |
| tetR-03      | 41B |       |       |      | NoAmplification             |
| tetS         | 41B | 37.83 | 87.18 | 1.83 | MultipleMeltPeaks           |

|             |     |       |       |      |                                          |
|-------------|-----|-------|-------|------|------------------------------------------|
| tetT        | 41B |       |       |      | NoAmplification                          |
| tetU-01     | 41B |       |       |      | NoAmplification                          |
| tetV        | 41B |       |       |      | NoAmplification                          |
| tetW-01     | 41B | 21.25 | 81.79 | 1.99 |                                          |
| tetX        | 41B |       |       |      | NoAmplification                          |
| tnpA-01     | 41B |       |       |      | LowEfficiency, CtIsSmall, Ct             |
| tnpA-02     | 41B | 38.41 | 84.62 | 1.6  |                                          |
| tnpA-03     | 41B | 40.2  | 74.85 | 1.84 |                                          |
| tnpA-04     | 41B | 34.82 | 86.35 | 1.88 |                                          |
| tnpA-05     | 41B | 30.82 | 80.69 | 1.94 |                                          |
| tnpA-07     | 41B |       |       |      | NoAmplification                          |
| tolC-01     | 41B | 38.21 | 80.3  | 1.71 |                                          |
| tolC-02     | 41B | 27.52 | 77.34 | 1.96 | MultipleMeltPeaks                        |
| tolC-03     | 41B | 30.6  | 85.09 | 1.91 | MultipleMeltPeaks                        |
| Tp614       | 41B | 32.88 | 83.38 | 1.92 |                                          |
| ttgA        | 41B |       |       |      | NoAmplification                          |
| ttgB        | 41B | 44.56 | 85.03 | 1.63 | MultipleMeltPeaks                        |
| vanA        | 41B |       |       |      | NoAmplification                          |
| vanB-01     | 41B | 33.68 | 84.48 | 1.98 |                                          |
| vanC-01     | 41B |       |       |      | LowEfficiency, CtIsSmall, S <sub>c</sub> |
| vanC-02     | 41B |       |       |      | LowEfficiency, CtIsSmall, S <sub>c</sub> |
| vanC-03     | 41B | 28.13 | 91.51 | 1.92 | MultipleMeltPeaks                        |
| vanC1       | 41B |       |       |      | NoAmplification                          |
| vanC2/vanC3 | 41B | 32.93 | 80.75 | 2.05 |                                          |
| vanG        | 41B |       |       |      | CurveFitFailed                           |
| vanHB       | 41B | 34.4  | 89.16 | 1.84 |                                          |
| vanHD       | 41B | 36.59 | 82.73 | 1.79 | MultipleMeltPeaks                        |
| vanRA-01    | 41B |       |       |      | NoAmplification                          |
| vanRA-02    | 41B |       |       |      | NoAmplification                          |
| vanRB       | 41B | 32.07 | 86.89 | 2    |                                          |
| vanRC       | 41B |       |       |      | NoAmplification                          |
| vanRC4      | 41B |       |       |      | NoAmplification                          |
| vanRD       | 41B |       |       |      | NoAmplification                          |
| vanSA       | 41B |       |       |      | BadR2, LowEfficiency, CtIsS              |
| vanSB       | 41B | 32.59 | 74.39 | 2.05 |                                          |
| vanSC-01    | 41B | 33.34 | 83.96 | 2    |                                          |
| vanSC-02    | 41B |       |       |      | NoAmplification                          |
| vanTC-01    | 41B |       |       |      | NoAmplification                          |
| vanTC-02    | 41B | 28.48 | 86.01 | 1.82 |                                          |
| vanTE       | 41B | 30.45 | 88.52 | 1.89 |                                          |
| vanTG       | 41B |       |       |      | BadR2, CtIsSmall, Saturatio              |
| vanWB       | 41B |       |       |      | NoAmplification                          |
| vanWG       | 41B | 34.61 | 75.6  | 1.97 |                                          |
| vanXA       | 41B |       |       |      | CurveFitFailed                           |
| vanXB       | 41B |       |       |      | NoAmplification                          |
| vanXD       | 41B | 30.47 | 75.46 | 2.04 |                                          |

|              |     |       |       |      |                           |
|--------------|-----|-------|-------|------|---------------------------|
| vanYB        | 41B | 37.92 | 82.37 | 1.82 |                           |
| vanYD-01     | 41B | 33.18 | 88.87 | 1.89 |                           |
| vanYD-02     | 41B | 38.39 | 73.31 | 1.97 |                           |
| vatB-01      | 41B |       |       |      | CtIsLarge, CurveFitFailed |
| vatB-02      | 41B |       |       |      | CurveFitFailed            |
| vatC-01      | 41B |       |       |      | CurveFitFailed            |
| vatC-02      | 41B | 32.98 | 87.59 | 1.85 |                           |
| vatE-01      | 41B | 29.56 | 77.21 | 2.1  |                           |
| vatE-02      | 41B |       |       |      | NoAmplification           |
| vgaA-01      | 41B |       |       |      | CurveFitFailed            |
| vgaA-02      | 41B |       |       |      | CurveFitFailed            |
| vgb-01       | 41B | 34.1  | 82.52 | 1.93 | MultipleMeltPeaks         |
| vgbB-01      | 41B | 38.37 | 76.43 | 1.77 | MultipleMeltPeaks         |
| vgbB-02      | 41B |       |       |      | NoAmplification           |
| yceE/mdtG-0  | 41B |       |       |      | NoAmplification           |
| yceE/mdtG-0  | 41B | 34.18 | 80.87 | 1.92 |                           |
| yceL/mdtH-0  | 41B | 30.81 | 88.39 | 1.98 |                           |
| yceL/mdtH-0  | 41B |       |       |      | NoAmplification           |
| yceL/mdtH-0  | 41B | 36.17 | 90.15 | 1.7  | MultipleMeltPeaks         |
| yidY/mdtL-01 | 41B | 30.53 | 88.58 | 1.96 | MultipleMeltPeaks         |
| yidY/mdtL-02 | 41B | 40.32 | 61.97 | 1.7  | MultipleMeltPeaks         |































| Assay          | Sample | Ct | Tm    | Efficiency | flag                         |
|----------------|--------|----|-------|------------|------------------------------|
| 16S rRNA       | 41C    |    | 14.83 | 82.24      | 1.97                         |
| aac            | 41C    |    | 30.9  | 81.86      | 2.03 MultipleMeltPeaks       |
| aac(6')-Ib(akz | 41C    |    |       |            | CurveFitFailed               |
| aac(6')-Ib(akz | 41C    |    | 27.48 | 81.62      | 1.94 MultipleMeltPeaks       |
| aac(6')-Ib(akz | 41C    |    | 32.26 | 83.61      | 1.95                         |
| aac(6')-II     | 41C    |    | 32.76 | 81.74      | 1.9                          |
| aac(6')I1      | 41C    |    | 41.57 | 85.66      | 1.74 MultipleMeltPeaks       |
| aacA/aphD      | 41C    |    |       |            | LowEfficiency, CtIsSmall, Ci |
| aacC           | 41C    |    | 31.93 | 85.91      | 1.83                         |
| aacC1          | 41C    |    |       |            | LowEfficiency, CtIsSmall, Ci |
| aacC2          | 41C    |    |       |            | NoAmplification              |
| aacC4          | 41C    |    | 39.07 | 78.65      | 1.78 MultipleMeltPeaks       |
| aadA-01        | 41C    |    | 33.11 | 82.54      | 1.95                         |
| aadA-02        | 41C    |    | 29.64 | 82.23      | 1.96                         |
| aadA-1-01      | 41C    |    | 35.64 | 81.45      | 1.83                         |
| aadA-1-02      | 41C    |    |       |            | BadR2, LowEfficiency, CtIsS  |
| aadA1          | 41C    |    | 37.82 | 79.53      | 1.79 MultipleMeltPeaks       |
| aadA2-01       | 41C    |    | 38.27 | 82.77      | 1.89                         |
| aadA2-02       | 41C    |    | 33.87 | 75.27      | 1.92                         |
| aadA2-03       | 41C    |    |       |            | LowEfficiency, CtIsSmall, S: |
| aadA5-01       | 41C    |    |       |            | CurveFitFailed               |
| aadA5-02       | 41C    |    | 31.76 | 86.36      | 1.89                         |
| aadA9-01       | 41C    |    | 38.59 | 84.07      | 1.77                         |
| aadA9-02       | 41C    |    |       |            | LowEfficiency, CtIsSmall, Ci |
| aadD           | 41C    |    |       |            | NoAmplification              |
| aadE           | 41C    |    |       |            | CurveFitFailed               |
| acrA-01        | 41C    |    | 32.19 | 88.68      | 1.96 MultipleMeltPeaks       |
| acrA-02        | 41C    |    | 35.19 | 80.5       | 1.86                         |
| acrA-03        | 41C    |    | 35.98 | 90.21      | 1.74                         |
| acrA-04        | 41C    |    | 31.59 | 80.54      | 1.94                         |
| acrA-05        | 41C    |    | 32.09 | 83.09      | 1.94 MultipleMeltPeaks       |
| acrB-01        | 41C    |    | 29.05 | 83.13      | 1.94                         |
| acrF           | 41C    |    | 30.63 | 83.13      | 1.85                         |
| acrR-01        | 41C    |    | 37.46 | 81.5       | 1.8                          |
| acrR-02        | 41C    |    | 35.06 | 83.22      | 1.86                         |
| Actin          | 41C    |    | 22.46 | 87.07      | 1.96 MultipleMeltPeaks       |
| adeA           | 41C    |    |       |            | CurveFitFailed               |
| ampC-01        | 41C    |    | 29.07 | 84.69      | 1.98                         |
| ampC-02        | 41C    |    |       |            | NoAmplification              |
| ampC-04        | 41C    |    | 32.04 | 78.69      | 1.93                         |
| ampC-05        | 41C    |    |       |            | NoAmplification              |
| ampC-06        | 41C    |    | 27.88 | 84.35      | 1.94                         |
| ampC-07        | 41C    |    | 36.31 | 81.3       | 1.83                         |
| ampC-09        | 41C    |    |       |            | LowEfficiency, CtIsSmall, S: |
| ampC/blaDH     | 41C    |    | 31.3  | 84.56      | 1.97                         |

|               |     |       |       |      |                             |
|---------------|-----|-------|-------|------|-----------------------------|
| aph           | 41C |       |       |      | LowEfficiency, CtIsSmall, S |
| aph(2')-Id-01 | 41C |       |       |      | LowEfficiency, CtIsSmall, C |
| aph(2')-Id-02 | 41C |       |       |      | LowEfficiency, CtIsSmall, S |
| aph6ia        | 41C |       |       |      | NoAmplification             |
| aphA1(aka k   | 41C |       |       |      | LowEfficiency, CtIsSmall, S |
| bacA-01       | 41C |       |       |      | LowEfficiency, CtIsSmall, C |
| bacA-02       | 41C | 35.29 | 86.29 | 1.76 |                             |
| BETA-globin   | 41C | 23.96 | 83.95 | 1.98 | MultipleMeltPeaks           |
| bla-ACC-1     | 41C | 40.46 | 74.51 | 1.73 |                             |
| bla-L1        | 41C | 31.69 | 85.53 | 1.98 |                             |
| bla1          | 41C |       |       |      | LowEfficiency, CtIsSmall, S |
| blaCMY        | 41C | 32.93 | 80.62 | 1.92 |                             |
| blaCMY2-01    | 41C |       |       |      | BadR2, LowEfficiency, CtIsS |
| blaCMY2-02    | 41C | 29.78 | 85.57 | 1.98 |                             |
| blaCTX-M-01   | 41C | 34.67 | 86.64 | 1.91 |                             |
| blaCTX-M-02   | 41C | 33.47 | 79.96 | 1.86 |                             |
| blaCTX-M-03   | 41C | 31.85 | 82.63 | 1.92 |                             |
| blaCTX-M-04   | 41C | 36.67 | 88.05 | 1.8  |                             |
| blaCTX-M-05   | 41C | 31.05 | 77.17 | 1.82 |                             |
| blaCTX-M-06   | 41C |       |       |      | NoAmplification             |
| blaGES        | 41C |       |       |      | NoAmplification             |
| blaIMP-01     | 41C |       |       |      | NoAmplification             |
| blaIMP-02     | 41C |       |       |      | CurveFitFailed              |
| blaMOX/blaC   | 41C |       |       |      | NoAmplification             |
| blaOCH        | 41C |       |       |      | NoAmplification             |
| blaOKP        | 41C |       |       |      | NoAmplification             |
| blaOXA1/bla   | 41C |       |       |      | CurveFitFailed              |
| blaOXA10-01   | 41C |       |       |      | CurveFitFailed              |
| blaOXA10-02   | 41C | 36.83 | 78.78 | 1.85 |                             |
| blaOXY        | 41C | 35.71 | 90.11 | 1.65 |                             |
| blaPAO        | 41C |       |       |      | NoAmplification             |
| blaPER        | 41C |       |       |      | CurveFitFailed              |
| blaPSE        | 41C |       |       |      | NoAmplification             |
| blaROB        | 41C | 38.69 | 81.62 | 1.71 |                             |
| blaSFO        | 41C | 32.3  | 82.41 | 1.95 | MultipleMeltPeaks           |
| blaSHV-01     | 41C | 40.29 | 73.25 | 1.81 |                             |
| blaSHV-02     | 41C |       |       |      | CurveFitFailed              |
| blaTEM        | 41C | 27.29 | 79.72 | 2.03 |                             |
| blaTLA        | 41C |       |       |      | CurveFitFailed              |
| blaVEB        | 41C |       |       |      | LowEfficiency, CtIsSmall, C |
| blaVIM        | 41C | 40.71 | 79.29 | 1.78 |                             |
| blaZ          | 41C | 28.07 | 75.12 | 2.06 |                             |
| carB          | 41C |       |       |      | LowEfficiency, CtIsSmall, C |
| catA1         | 41C |       |       |      | NoAmplification             |
| catB3         | 41C |       |       |      | NoAmplification             |
| catB8         | 41C | 31.13 | 81.67 | 1.98 |                             |

|            |     |       |       |      |                              |
|------------|-----|-------|-------|------|------------------------------|
| ceoA       | 41C | 29.82 | 82.45 | 1.93 |                              |
| cepA       | 41C |       |       |      | NoAmplification              |
| cfiA       | 41C | 31.88 | 84.65 | 1.88 |                              |
| cfr        | 41C |       |       |      | LowEfficiency, CtIsSmall, S: |
| cfxA       | 41C |       |       |      | CurveFitFailed               |
| cmeA       | 41C |       |       |      | CurveFitFailed               |
| cmlA1-01   | 41C | 37.03 | 87.56 | 1.79 |                              |
| cmlA1-02   | 41C |       |       |      | NoAmplification              |
| cmr        | 41C |       |       |      | CurveFitFailed               |
| cmx(A)     | 41C | 28.54 | 84.46 | 1.98 |                              |
| cphA-01    | 41C | 36.46 | 81.04 | 1.87 | MultipleMeltPeaks            |
| cphA-02    | 41C | 35.56 | 82.61 | 1.82 | MultipleMeltPeaks            |
| dfrA1      | 41C | 33.69 | 79.65 | 1.94 |                              |
| dfrA12     | 41C |       |       |      | CurveFitFailed               |
| emrD       | 41C |       |       |      | CurveFitFailed               |
| ereA       | 41C | 30.76 | 82.5  | 1.96 |                              |
| ereB       | 41C |       |       |      | CurveFitFailed               |
| erm(34)    | 41C |       |       |      | NoAmplification              |
| erm(35)    | 41C |       |       |      | CurveFitFailed               |
| erm(36)    | 41C | 29.7  | 82.61 | 1.98 |                              |
| ermA       | 41C |       |       |      | CurveFitFailed               |
| ermA/ermTR | 41C |       |       |      | NoAmplification              |
| ermB       | 41C | 28.76 | 75.11 | 2.09 |                              |
| ermC       | 41C |       |       |      | LowEfficiency, CtIsSmall, S: |
| ermF       | 41C |       |       |      | LowEfficiency, CtIsSmall, S: |
| ermJ/ermD  | 41C |       |       |      | CurveFitFailed               |
| ermK-01    | 41C |       |       |      | LowEfficiency, CtIsSmall, C: |
| ermK-02    | 41C |       |       |      | BadR2, LowEfficiency, CtIsS  |
| ermT-01    | 41C |       |       |      | CurveFitFailed               |
| ermT-02    | 41C |       |       |      | LowEfficiency, CtIsSmall, C: |
| ermX       | 41C | 28.35 | 83.18 | 1.88 |                              |
| ermY       | 41C |       |       |      | LowEfficiency, CtIsSmall, C: |
| fabK       | 41C | 20.03 | 80.04 | 2.08 |                              |
| floR       | 41C |       |       |      | NoAmplification              |
| folA       | 41C |       |       |      | NoAmplification              |
| fosB       | 41C |       |       |      | LowEfficiency, CtIsSmall, S: |
| fosX       | 41C |       |       |      | CurveFitFailed               |
| fox5       | 41C | 27.01 | 86.5  | 1.98 |                              |
| imiR       | 41C |       |       |      | CurveFitFailed               |
| ImrA-01    | 41C |       |       |      | NoAmplification              |
| intl       | 41C | 32.6  | 84.99 | 1.92 |                              |
| intl1      | 41C | 21.45 | 87.23 | 2.03 |                              |
| IS613      | 41C | 31.64 | 80.12 | 2.05 |                              |
| lnuA-01    | 41C |       |       |      | LowEfficiency, CtIsSmall, S: |
| lnuB-01    | 41C |       |       |      | LowEfficiency, CtIsSmall, C: |
| lnuB-02    | 41C |       |       |      | LowEfficiency, CtIsSmall, S: |

|                |     |       |       |      |                              |
|----------------|-----|-------|-------|------|------------------------------|
| lnuC           | 41C |       |       |      | LowEfficiency, CtIsSmall, S: |
| marR-01        | 41C | 31.83 | 85.44 | 1.93 |                              |
| matA/mel       | 41C | 18.17 | 77.87 | 2.06 |                              |
| mdet1          | 41C |       |       |      | CurveFitFailed               |
| mdtA           | 41C |       |       |      | CurveFitFailed               |
| mdtE/yhiU      | 41C | 34.09 | 79.64 | 2    |                              |
| mecA           | 41C |       |       |      | CurveFitFailed               |
| mefA           | 41C | 17.35 | 80.65 | 1.98 | MultipleMeltPeaks            |
| mepA           | 41C | 32.56 | 88.25 | 1.96 |                              |
| mexA           | 41C |       |       |      | CurveFitFailed               |
| mexD           | 41C | 33.44 | 80.21 | 2.03 |                              |
| mexE           | 41C |       |       |      | CurveFitFailed               |
| mexF           | 41C | 27.31 | 78.83 | 2.1  | MultipleMeltPeaks            |
| mphA-01        | 41C | 33.18 | 86.92 | 1.88 |                              |
| mphA-02        | 41C | 33.57 | 86.8  | 1.74 |                              |
| mphB           | 41C |       |       |      | CurveFitFailed               |
| mphC           | 41C |       |       |      | CurveFitFailed               |
| msrA-01        | 41C |       |       |      | CurveFitFailed               |
| msrC-01        | 41C |       |       |      | NoAmplification              |
| mtrC-01        | 41C | 30.48 | 83.5  | 1.91 |                              |
| mtrC-02        | 41C | 39.18 | 83.52 | 1.66 | MultipleMeltPeaks            |
| mtrD-02        | 41C | 27.7  | 81.26 | 2.01 | MultipleMeltPeaks            |
| mtrD-03        | 41C |       |       |      | CurveFitFailed               |
| NDM1           | 41C |       |       |      | LowEfficiency, CtIsSmall, S: |
| nimE           | 41C | 35.62 | 75.62 | 1.97 |                              |
| nisB           | 41C |       |       |      | NoAmplification              |
| oleC           | 41C | 30.85 | 88.9  | 1.89 |                              |
| oprD           | 41C | 28.5  | 88.05 | 1.97 |                              |
| oprJ           | 41C | 34.09 | 87.17 | 1.77 |                              |
| pbp            | 41C |       |       |      | CurveFitFailed               |
| pbp2x          | 41C |       |       |      | NoAmplification              |
| Pbp5           | 41C |       |       |      | CurveFitFailed               |
| penA           | 41C |       |       |      | NoAmplification              |
| pikR1          | 41C |       |       |      | BadR2, LowEfficiency, CtIsS  |
| pikR2          | 41C | 33.73 | 84.73 | 1.93 |                              |
| pmrA           | 41C | 24.33 | 79.71 | 2.07 |                              |
| pncA           | 41C | 31.81 | 91.13 | 1.94 |                              |
| putative multi | 41C | 39.83 | 77.32 | 1.77 | MultipleMeltPeaks            |
| qac            | 41C | 36.29 | 71.85 | 1.9  |                              |
| qacA           | 41C | 29.57 | 80.89 | 2.02 |                              |
| qacA/qacB      | 41C |       |       |      | BadR2, LowEfficiency, CtIsS  |
| qacEdelta1-0   | 41C | 28.14 | 79.29 | 2.02 |                              |
| qacEdelta1-0   | 41C | 38.48 | 86.34 | 1.74 | MultipleMeltPeaks            |
| qacH-01        | 41C | 32.79 | 86.4  | 1.96 |                              |
| qacH-02        | 41C |       |       |      | CurveFitFailed               |
| qnrA           | 41C |       |       |      | NoAmplification              |

|              |     |       |       |      |                              |
|--------------|-----|-------|-------|------|------------------------------|
| rarD-02      | 41C |       |       |      | NoAmplification              |
| sat4         | 41C |       |       |      | CurveFitFailed               |
| sdeB         | 41C |       |       |      | LowEfficiency, CtIsSmall, S: |
| spcN-01      | 41C |       |       |      | LowEfficiency, CtIsSmall, S: |
| speA         | 41C |       |       |      | NoAmplification              |
| str          | 41C |       |       |      | LowEfficiency, CtIsSmall, C: |
| strA         | 41C |       |       |      | LowEfficiency, CtIsSmall, S: |
| strB         | 41C | 28.29 | 83.92 | 1.92 |                              |
| sul1         | 41C | 33.54 | 89.83 | 1.76 |                              |
| sul2         | 41C |       |       |      | CurveFitFailed               |
| sulA/foIP-01 | 41C | 22.41 | 81.05 | 1.97 |                              |
| sulA/foIP-03 | 41C | 23.11 | 83.46 | 1.96 |                              |
| tet(32)      | 41C | 28.7  | 81.19 | 1.98 |                              |
| tet(34)      | 41C | 31.39 | 75.93 | 2    |                              |
| tet(35)      | 41C |       |       |      | NoAmplification              |
| tet(36)-A    | 41C |       |       |      | CurveFitFailed               |
| tet(36)-B    | 41C |       |       |      | LowEfficiency, CtIsSmall, S: |
| tet(37)      | 41C | 33.87 | 88.72 | 1.87 |                              |
| tetA-01      | 41C | 30.89 | 85.18 | 1.9  |                              |
| tetA-02      | 41C | 38.58 | 88.17 | 1.68 | MultipleMeltPeaks            |
| tetB-01      | 41C | 32.44 | 85.91 | 1.93 |                              |
| tetB-02      | 41C |       |       |      | CurveFitFailed               |
| tetC-01      | 41C |       |       |      | NoAmplification              |
| tetC-02      | 41C |       |       |      | LowEfficiency, CtIsSmall, C: |
| tetD-01      | 41C |       |       |      | LowEfficiency, CtIsSmall, S: |
| tetD-02      | 41C |       |       |      | CurveFitFailed               |
| tetE         | 41C |       |       |      | NoAmplification              |
| tetG-01      | 41C | 36.33 | 82.42 | 1.81 |                              |
| tetG-02      | 41C |       |       |      | CurveFitFailed               |
| tetH         | 41C |       |       |      | NoAmplification              |
| tetJ         | 41C |       |       |      | CurveFitFailed               |
| tetK         | 41C | 29.76 | 72.56 | 2.02 |                              |
| tetL-01      | 41C |       |       |      | CurveFitFailed               |
| tetL-02      | 41C | 34.74 | 85.45 | 1.74 |                              |
| tetM-01      | 41C |       |       |      | CurveFitFailed               |
| tetM-02      | 41C | 28.5  | 77.84 | 1.98 |                              |
| tetO-01      | 41C |       |       |      | LowEfficiency, CtIsSmall, S: |
| tetPA        | 41C |       |       |      | NoAmplification              |
| tetPB-01     | 41C |       |       |      | NoAmplification              |
| tetPB-02     | 41C | 28.76 | 84.8  | 2.02 |                              |
| tetPB-03     | 41C |       |       |      | CurveFitFailed               |
| tetPB-05     | 41C |       |       |      | LowEfficiency, CtIsSmall, C: |
| tetQ         | 41C |       |       |      | LowEfficiency, CtIsSmall, C: |
| tetR-02      | 41C | 29.67 | 85.43 | 1.92 |                              |
| tetR-03      | 41C |       |       |      | CurveFitFailed               |
| tetS         | 41C |       |       |      | CurveFitFailed               |

|             |     |       |       |      |                              |
|-------------|-----|-------|-------|------|------------------------------|
| tetT        | 41C |       |       |      | NoAmplification              |
| tetU-01     | 41C |       |       |      | NoAmplification              |
| tetV        | 41C |       |       |      | LowEfficiency, CtIsSmall, Ci |
| tetW-01     | 41C | 20.38 | 81.88 | 1.98 |                              |
| tetX        | 41C |       |       |      | BadR2, CtIsSmall, Saturatio  |
| tnpA-01     | 41C |       |       |      | CurveFitFailed               |
| tnpA-02     | 41C | 27.72 | 84.89 | 1.8  |                              |
| tnpA-03     | 41C | 28.79 | 77.98 | 2.06 |                              |
| tnpA-04     | 41C |       |       |      | CurveFitFailed               |
| tnpA-05     | 41C |       |       |      | CurveFitFailed               |
| tnpA-07     | 41C |       |       |      | LowEfficiency, CtIsSmall, Ci |
| tolC-01     | 41C |       |       |      | CurveFitFailed               |
| tolC-02     | 41C | 30.5  | 84.44 | 2    |                              |
| tolC-03     | 41C | 32.28 | 86.07 | 1.91 | MultipleMeltPeaks            |
| Tp614       | 41C | 36.01 | 73.35 | 1.83 | MultipleMeltPeaks            |
| ttgA        | 41C | 40.11 | 75.85 | 1.84 |                              |
| ttgB        | 41C |       |       |      | CtIsLarge, CurveFitFailed    |
| vanA        | 41C |       |       |      | NoAmplification              |
| vanB-01     | 41C |       |       |      | CurveFitFailed               |
| vanC-01     | 41C |       |       |      | CurveFitFailed               |
| vanC-02     | 41C |       |       |      | CurveFitFailed               |
| vanC-03     | 41C | 28.46 | 91.7  | 1.93 |                              |
| vanC1       | 41C |       |       |      | LowEfficiency, CtIsSmall, Ci |
| vanC2/vanC3 | 41C |       |       |      | CurveFitFailed               |
| vanG        | 41C |       |       |      | CurveFitFailed               |
| vanHB       | 41C |       |       |      | NoAmplification              |
| vanHD       | 41C |       |       |      | CurveFitFailed               |
| vanRA-01    | 41C |       |       |      | LowEfficiency, CtIsSmall, S: |
| vanRA-02    | 41C |       |       |      | LowEfficiency, CtIsSmall, S: |
| vanRB       | 41C | 35.13 | 76.14 | 1.83 |                              |
| vanRC       | 41C |       |       |      | LowEfficiency, CtIsSmall, S: |
| vanRC4      | 41C |       |       |      | LowEfficiency, CtIsSmall, S: |
| vanRD       | 41C |       |       |      | NoAmplification              |
| vanSA       | 41C |       |       |      | LowEfficiency, CtIsSmall, S: |
| vanSB       | 41C | 30.92 | 74.55 | 2.06 |                              |
| vanSC-01    | 41C | 36.08 | 84.08 | 1.89 | MultipleMeltPeaks            |
| vanSC-02    | 41C |       |       |      | NoAmplification              |
| vanTC-01    | 41C |       |       |      | LowEfficiency, CtIsSmall, S: |
| vanTC-02    | 41C |       |       |      | CurveFitFailed               |
| vanTE       | 41C |       |       |      | CurveFitFailed               |
| vanTG       | 41C | 32.18 | 74.87 | 2.03 |                              |
| vanWB       | 41C |       |       |      | NoAmplification              |
| vanWG       | 41C |       |       |      | LowEfficiency, CtIsSmall, S: |
| vanXA       | 41C |       |       |      | CurveFitFailed               |
| vanXB       | 41C |       |       |      | NoAmplification              |
| vanXD       | 41C | 30.77 | 75.49 | 2.02 |                              |

|              |     |       |       |      |                              |
|--------------|-----|-------|-------|------|------------------------------|
| vanYB        | 41C |       |       |      | LowEfficiency, CtIsSmall, S: |
| vanYD-01     | 41C | 36.25 | 80.76 | 1.8  |                              |
| vanYD-02     | 41C | 35.14 | 73.99 | 1.94 |                              |
| vatB-01      | 41C |       |       |      | LowEfficiency, CtIsSmall, C: |
| vatB-02      | 41C |       |       |      | BadR2, LowEfficiency, CtIsS  |
| vatC-01      | 41C |       |       |      | LowEfficiency, CtIsSmall, S: |
| vatC-02      | 41C | 43.58 | 87.66 | 1.77 | MultipleMeltPeaks            |
| vatE-01      | 41C | 30.29 | 76.65 | 2.11 |                              |
| vatE-02      | 41C |       |       |      | NoAmplification              |
| vgaA-01      | 41C |       |       |      | LowEfficiency, CtIsSmall, S: |
| vgaA-02      | 41C |       |       |      | CurveFitFailed               |
| vgb-01       | 41C |       |       |      | CurveFitFailed               |
| vgbB-01      | 41C |       |       |      | CurveFitFailed               |
| vgbB-02      | 41C |       |       |      | CurveFitFailed               |
| yceE/mdtG-0  | 41C |       |       |      | CurveFitFailed               |
| yceE/mdtG-0  | 41C |       |       |      | NoAmplification              |
| yceL/mdtH-0  | 41C | 29.19 | 88.45 | 1.92 |                              |
| yceL/mdtH-0  | 41C |       |       |      | LowEfficiency, CtIsSmall, S: |
| yceL/mdtH-0  | 41C | 34.86 | 91.28 | 1.78 | MultipleMeltPeaks            |
| yidY/mdtL-01 | 41C | 32.58 | 85.86 | 1.87 |                              |
| yidY/mdtL-02 | 41C |       |       |      | CurveFitFailed               |































| Assay          | Sample | Ct | Tm    | Efficiency | flag                   |
|----------------|--------|----|-------|------------|------------------------|
| 16S rRNA       | 42A    |    | 15.91 | 82.3       | 1.97                   |
| aac            | 42A    |    | 30.63 | 87.44      | 1.82 MultipleMeltPeaks |
| aac(6')-Ib(akz | 42A    |    | 39.87 | 80.54      | 1.85                   |
| aac(6')-Ib(akz | 42A    |    | 30.39 | 82.32      | 1.97                   |
| aac(6')-Ib(akz | 42A    |    | 30.43 | 79.72      | 1.99 MultipleMeltPeaks |
| aac(6')-II     | 42A    |    | 34.42 | 80.97      | 1.62 MultipleMeltPeaks |
| aac(6')I1      | 42A    |    | 29.13 | 91.85      | 2.03                   |
| aacA/aphD      | 42A    |    |       |            | NoAmplification        |
| aacC           | 42A    |    | 28.81 | 91.27      | 1.91                   |
| aacC1          | 42A    |    | 37.37 | 65.24      | 2.12 MultipleMeltPeaks |
| aacC2          | 42A    |    |       |            | NoAmplification        |
| aacC4          | 42A    |    | 31.84 | 87.33      | 1.92 MultipleMeltPeaks |
| aadA-01        | 42A    |    |       |            | NoAmplification        |
| aadA-02        | 42A    |    | 33.17 | 80.23      | 1.91                   |
| aadA-1-01      | 42A    |    | 33.76 | 81.33      | 1.85                   |
| aadA-1-02      | 42A    |    |       |            | NoAmplification        |
| aadA1          | 42A    |    | 30.77 | 91.24      | 1.87                   |
| aadA2-01       | 42A    |    | 36.82 | 91.67      | 1.65                   |
| aadA2-02       | 42A    |    | 31.93 | 75.42      | 2.04                   |
| aadA2-03       | 42A    |    |       |            | CurveFitFailed         |
| aadA5-01       | 42A    |    | 34.3  | 88.48      | 1.86                   |
| aadA5-02       | 42A    |    | 31.55 | 86.25      | 1.92                   |
| aadA9-01       | 42A    |    | 38.94 | 82.34      | 1.71 MultipleMeltPeaks |
| aadA9-02       | 42A    |    | 31.07 | 92.67      | 1.96 MultipleMeltPeaks |
| aadD           | 42A    |    |       |            | NoAmplification        |
| aadE           | 42A    |    |       |            | NoAmplification        |
| acrA-01        | 42A    |    | 27    | 88.65      | 1.93 MultipleMeltPeaks |
| acrA-02        | 42A    |    | 34.81 | 88.32      | 1.83                   |
| acrA-03        | 42A    |    | 34.09 | 91         | 1.69                   |
| acrA-04        | 42A    |    | 28.09 | 90.21      | 1.96                   |
| acrA-05        | 42A    |    | 30.17 | 86.49      | 1.93 MultipleMeltPeaks |
| acrB-01        | 42A    |    | 40.39 | 75.65      | 1.8                    |
| acrF           | 42A    |    | 25.81 | 84.6       | 1.87                   |
| acrR-01        | 42A    |    | 32.29 | 92.04      | 1.88                   |
| acrR-02        | 42A    |    | 32.74 | 87.13      | 1.91                   |
| Actin          | 42A    |    | 21.9  | 86.88      | 1.92                   |
| adeA           | 42A    |    | 36.78 | 79.65      | 1.82 MultipleMeltPeaks |
| ampC-01        | 42A    |    | 31.54 | 89.53      | 1.86                   |
| ampC-02        | 42A    |    | 37.45 | 75.14      | 2.33 MultipleMeltPeaks |
| ampC-04        | 42A    |    | 31.16 | 83.68      | 1.58 MultipleMeltPeaks |
| ampC-05        | 42A    |    | 35.67 | 87.36      | 1.57 MultipleMeltPeaks |
| ampC-06        | 42A    |    | 39.44 | 79.81      | 1.89 MultipleMeltPeaks |
| ampC-07        | 42A    |    | 34.51 | 91.26      | 1.75                   |
| ampC-09        | 42A    |    | 18.85 | 88.3       | 1.76 MultipleMeltPeaks |
| ampC/blaDH     | 42A    |    | 30.19 | 86.87      | 1.99 MultipleMeltPeaks |

|                          |     |       |       |      |                                          |
|--------------------------|-----|-------|-------|------|------------------------------------------|
| aph                      | 42A |       |       |      | LowEfficiency, CtIsSmall, C              |
| aph(2')-Id-01            | 42A |       |       |      | NoAmplification                          |
| aph(2')-Id-02            | 42A |       |       |      | NoAmplification                          |
| aph6ia                   | 42A | 38.15 | 91.55 | 1.65 |                                          |
| aphA1(aka k <sub>z</sub> | 42A |       |       |      | CurveFitFailed                           |
| bacA-01                  | 42A | 32.41 | 75.75 | 1.91 |                                          |
| bacA-02                  | 42A | 29.14 | 91.06 | 1.84 |                                          |
| BETA-globin              | 42A | 23.42 | 83.93 | 1.97 |                                          |
| bla-ACC-1                | 42A | 35.74 | 91.48 | 1.69 |                                          |
| bla-L1                   | 42A | 31.77 | 85.68 | 1.93 | MultipleMeltPeaks                        |
| bla1                     | 42A |       |       |      | NoAmplification                          |
| blaCMY                   | 42A | 42.19 | 76.63 | 1.65 |                                          |
| blaCMY2-01               | 42A | 41.54 | 68.08 | 1.57 | BadR2, MultipleMeltPeaks                 |
| blaCMY2-02               | 42A | 28.17 | 88.4  | 1.96 |                                          |
| blaCTX-M-01              | 42A |       |       |      | CurveFitFailed                           |
| blaCTX-M-02              | 42A | 20.25 | 88.12 | 1.87 | MultipleMeltPeaks                        |
| blaCTX-M-03              | 42A |       |       |      | NoAmplification                          |
| blaCTX-M-04              | 42A | 25.26 | 91.26 | 2.06 |                                          |
| blaCTX-M-05              | 42A | 31.6  | 87.47 | 1.83 | MultipleMeltPeaks                        |
| blaCTX-M-06              | 42A |       |       |      | NoAmplification                          |
| blaGES                   | 42A |       |       |      | CurveFitFailed                           |
| blaIMP-01                | 42A | 40.74 | 74.81 | 1.74 | BadR2                                    |
| blaIMP-02                | 42A |       |       |      | CurveFitFailed                           |
| blaMOX/blaC              | 42A |       |       |      | NoAmplification                          |
| blaOCH                   | 42A |       |       |      | NoAmplification                          |
| blaOKP                   | 42A |       |       |      | NoAmplification                          |
| blaOXA1/blaC             | 42A |       |       |      | NoAmplification                          |
| blaOXA10-01              | 42A |       |       |      | NoAmplification                          |
| blaOXA10-02              | 42A |       |       |      | CurveFitFailed                           |
| blaOXY                   | 42A | 30.43 | 90.43 | 1.81 |                                          |
| blaPAO                   | 42A | 17.66 | 83.35 | 1.94 |                                          |
| blaPER                   | 42A |       |       |      | CurveFitFailed                           |
| blaPSE                   | 42A |       |       |      | CurveFitFailed                           |
| blaROB                   | 42A |       |       |      | NoAmplification                          |
| blaSFO                   | 42A | 27.77 | 91.91 | 1.9  |                                          |
| blaSHV-01                | 42A | 30    | 91.62 | 1.82 |                                          |
| blaSHV-02                | 42A | 33.98 | 89.94 | 1.9  |                                          |
| blaTEM                   | 42A | 25.78 | 79.53 | 2.07 |                                          |
| blaTLA                   | 42A |       |       |      | LowEfficiency, CtIsSmall, S <sub>e</sub> |
| blaVEB                   | 42A |       |       |      | NoAmplification                          |
| blaVIM                   | 42A | 35.37 | 89.87 | 1.8  |                                          |
| blaZ                     | 42A |       |       |      | NoAmplification                          |
| carB                     | 42A |       |       |      | CurveFitFailed                           |
| catA1                    | 42A |       |       |      | NoAmplification                          |
| catB3                    | 42A |       |       |      | NoAmplification                          |
| catB8                    | 42A | 29.66 | 82.45 | 1.97 |                                          |

|            |     |       |       |      |                              |
|------------|-----|-------|-------|------|------------------------------|
| ceoA       | 42A | 28.17 | 82    | 1.95 | MultipleMeltPeaks            |
| cepA       | 42A |       |       |      | NoAmplification              |
| cfiA       | 42A | 34.04 | 86.88 | 1.8  |                              |
| cfr        | 42A |       |       |      | LowEfficiency, CtIsSmall, S: |
| cfxA       | 42A | 28.33 | 77.43 | 2.03 |                              |
| cmeA       | 42A |       |       |      | CurveFitFailed               |
| cmlA1-01   | 42A | 32.9  | 91.45 | 1.74 |                              |
| cmlA1-02   | 42A | 30.89 | 91.39 | 1.9  |                              |
| cmr        | 42A | 35.7  | 78.61 | 1.86 |                              |
| cmx(A)     | 42A | 27.31 | 84.42 | 2    | MultipleMeltPeaks            |
| cphA-01    | 42A | 26.13 | 89.51 | 1.88 |                              |
| cphA-02    | 42A | 30.07 | 89.1  | 1.88 |                              |
| dfrA1      | 42A | 38.13 | 86.25 | 1.74 |                              |
| dfrA12     | 42A |       |       |      | NoAmplification              |
| emrD       | 42A | 27.4  | 90.33 | 1.9  |                              |
| ereA       | 42A |       |       |      | CurveFitFailed               |
| ereB       | 42A | 33.95 | 88.02 | 1.9  |                              |
| erm(34)    | 42A | 30.92 | 91.8  | 1.97 |                              |
| erm(35)    | 42A |       |       |      | NoAmplification              |
| erm(36)    | 42A | 33.01 | 85.8  | 2.01 |                              |
| ermA       | 42A |       |       |      | LowEfficiency, CtIsSmall, S: |
| ermA/ermTR | 42A |       |       |      | NoAmplification              |
| ermB       | 42A |       |       |      | NoAmplification              |
| ermC       | 42A |       |       |      | CurveFitFailed               |
| ermF       | 42A |       |       |      | NoAmplification              |
| ermJ/ermD  | 42A | 40.04 | 86.94 | 1.58 |                              |
| ermK-01    | 42A | 36.47 | 73.73 | 1.87 |                              |
| ermK-02    | 42A | 37.52 | 85.29 | 2.11 | MultipleMeltPeaks            |
| ermT-01    | 42A |       |       |      | NoAmplification              |
| ermT-02    | 42A |       |       |      | NoAmplification              |
| ermX       | 42A | 31.37 | 90.29 | 1.91 |                              |
| ermY       | 42A |       |       |      | NoAmplification              |
| fabK       | 42A | 26.41 | 79.46 | 2.04 |                              |
| floR       | 42A | 29.71 | 91.83 | 1.94 |                              |
| folA       | 42A |       |       |      | NoAmplification              |
| fosB       | 42A |       |       |      | LowEfficiency, CtIsSmall, S: |
| fosX       | 42A |       |       |      | NoAmplification              |
| fox5       | 42A | 24.9  | 91.96 | 1.93 |                              |
| imiR       | 42A |       |       |      | NoAmplification              |
| ImrA-01    | 42A | 38.23 | 82.66 | 1.96 |                              |
| intl       | 42A | 29.05 | 84.46 | 1.94 | MultipleMeltPeaks            |
| intl1      | 42A | 19.69 | 87.28 | 1.99 |                              |
| IS613      | 42A | 38.05 | 77.7  | 1.78 |                              |
| lnuA-01    | 42A |       |       |      | NoAmplification              |
| lnuB-01    | 42A |       |       |      | NoAmplification              |
| lnuB-02    | 42A |       |       |      | NoAmplification              |

|                |     |       |       |      |                           |
|----------------|-----|-------|-------|------|---------------------------|
| lnuC           | 42A | 35.51 | 84.26 | 1.7  |                           |
| marR-01        | 42A | 32.21 | 91.16 | 1.96 |                           |
| matA/mel       | 42A | 26.86 | 77.17 | 2.06 | MultipleMeltPeaks         |
| mdetI1         | 42A |       |       |      | NoAmplification           |
| mdtA           | 42A | 38.01 | 86.37 | 1.59 | MultipleMeltPeaks         |
| mdtE/yhiU      | 42A | 32.66 | 90.82 | 1.88 |                           |
| mecA           | 42A |       |       |      | NoAmplification           |
| mefA           | 42A | 27.07 | 80.41 | 1.99 |                           |
| mepA           | 42A | 29.56 | 86.52 | 2.01 | MultipleMeltPeaks         |
| mexA           | 42A | 17.46 | 85.48 | 1.92 |                           |
| mexD           | 42A | 31.82 | 80.34 | 2.03 |                           |
| mexE           | 42A | 18.81 | 83.45 | 1.94 |                           |
| mexF           | 42A | 17.24 | 88.1  | 2.06 |                           |
| mphA-01        | 42A | 25.69 | 92.28 | 1.97 |                           |
| mphA-02        | 42A | 25.94 | 89.91 | 2    |                           |
| mphB           | 42A | 33.83 | 88.31 | 1.83 |                           |
| mphC           | 42A |       |       |      | CurveFitFailed            |
| msrA-01        | 42A |       |       |      | CtIsLarge, CurveFitFailed |
| msrC-01        | 42A | 40.82 | 73.42 | 1.76 |                           |
| mtrC-01        | 42A | 31.55 | 90.78 | 2.01 |                           |
| mtrC-02        | 42A | 34.82 | 87.42 | 1.88 | MultipleMeltPeaks         |
| mtrD-02        | 42A | 26.18 | 87.62 | 2.05 |                           |
| mtrD-03        | 42A |       |       |      | CurveFitFailed            |
| NDM1           | 42A | 38.72 | 84.1  | 1.63 | MultipleMeltPeaks         |
| nimE           | 42A |       |       |      | NoAmplification           |
| nisB           | 42A | 34.73 | 88.39 | 1.89 | MultipleMeltPeaks         |
| oleC           | 42A | 30.77 | 89.44 | 1.94 |                           |
| oprD           | 42A | 17.79 | 84.75 | 1.92 | MultipleMeltPeaks         |
| oprJ           | 42A | 17.92 | 89.21 | 1.97 | MultipleMeltPeaks         |
| pbp            | 42A |       |       |      | NoAmplification           |
| pbp2x          | 42A |       |       |      | NoAmplification           |
| Pbp5           | 42A |       |       |      | NoAmplification           |
| penA           | 42A | 30.06 | 91.1  | 1.88 |                           |
| pikR1          | 42A | 37.98 | 86.77 | 1.69 | MultipleMeltPeaks         |
| pikR2          | 42A | 29.01 | 90.54 | 2.04 | MultipleMeltPeaks         |
| pmrA           | 42A |       |       |      | CurveFitFailed            |
| pncA           | 42A | 21.6  | 92.49 | 1.77 |                           |
| putative multi | 42A | 34.58 | 84.02 | 1.89 | MultipleMeltPeaks         |
| qac            | 42A | 32.84 | 87.26 | 1.94 |                           |
| qacA           | 42A |       |       |      | NoAmplification           |
| qacA/qacB      | 42A | 41.37 | 69.1  | 1.53 | MultipleMeltPeaks         |
| qacEdelta1-0   | 42A |       |       |      | NoAmplification           |
| qacEdelta1-0   | 42A | 31.24 | 89.95 | 1.97 |                           |
| qacH-01        | 42A | 30.47 | 89.36 | 1.97 | MultipleMeltPeaks         |
| qacH-02        | 42A | 35.13 | 83.96 | 1.61 |                           |
| qnrA           | 42A | 33.78 | 77.35 | 1.96 |                           |



|              |     |       |       |      |                              |
|--------------|-----|-------|-------|------|------------------------------|
| rarD-02      | 42A | 33.86 | 82.69 | 1.89 | MultipleMeltPeaks            |
| sat4         | 42A |       |       |      | NoAmplification              |
| sdeB         | 42A |       |       |      | NoAmplification              |
| spcN-01      | 42A |       |       |      | NoAmplification              |
| speA         | 42A |       |       |      | NoAmplification              |
| str          | 42A |       |       |      | NoAmplification              |
| strA         | 42A |       |       |      | LowEfficiency, CtIsSmall, Ct |
| strB         | 42A | 32.06 | 87.83 | 1.87 |                              |
| sul1         | 42A | 32.57 | 89.69 | 1.87 |                              |
| sul2         | 42A |       |       |      | NoAmplification              |
| sulA/foIP-01 | 42A | 35.28 | 87.93 | 1.86 |                              |
| sulA/foIP-03 | 42A | 27.58 | 82.53 | 1.95 |                              |
| tet(32)      | 42A |       |       |      | NoAmplification              |
| tet(34)      | 42A | 32.3  | 75.56 | 1.99 |                              |
| tet(35)      | 42A | 38.63 | 75.57 | 1.82 |                              |
| tet(36)-A    | 42A |       |       |      | CurveFitFailed               |
| tet(36)-B    | 42A | 36.03 | 78.25 | 1.81 |                              |
| tet(37)      | 42A | 28.82 | 78.69 | 1.98 | MultipleMeltPeaks            |
| tetA-01      | 42A | 32.09 | 85.1  | 1.92 |                              |
| tetA-02      | 42A | 28.26 | 92.32 | 1.88 |                              |
| tetB-01      | 42A | 32.93 | 80.41 | 1.97 | MultipleMeltPeaks            |
| tetB-02      | 42A |       |       |      | CurveFitFailed               |
| tetC-01      | 42A |       |       |      | NoAmplification              |
| tetC-02      | 42A |       |       |      | LowEfficiency, CtIsSmall, Ct |
| tetD-01      | 42A |       |       |      | NoAmplification              |
| tetD-02      | 42A | 33.59 | 86.7  | 1.85 |                              |
| tetE         | 42A |       |       |      | NoAmplification              |
| tetG-01      | 42A | 32.53 | 87.71 | 1.96 |                              |
| tetG-02      | 42A | 30.5  | 89.45 | 1.96 | MultipleMeltPeaks            |
| tetH         | 42A |       |       |      | NoAmplification              |
| tetJ         | 42A |       |       |      | NoAmplification              |
| tetK         | 42A | 40.59 | 68.85 | 1.73 |                              |
| tetL-01      | 42A |       |       |      | NoAmplification              |
| tetL-02      | 42A | 34.16 | 85.27 | 1.8  |                              |
| tetM-01      | 42A | 38.01 | 78.45 | 1.93 |                              |
| tetM-02      | 42A |       |       |      | NoAmplification              |
| tetO-01      | 42A |       |       |      | NoAmplification              |
| tetPA        | 42A |       |       |      | NoAmplification              |
| tetPB-01     | 42A |       |       |      | NoAmplification              |
| tetPB-02     | 42A | 29.29 | 84.79 | 1.99 |                              |
| tetPB-03     | 42A |       |       |      | NoAmplification              |
| tetPB-05     | 42A | 33.84 | 77.64 | 1.89 |                              |
| tetQ         | 42A |       |       |      | NoAmplification              |
| tetR-02      | 42A | 27.65 | 91.48 | 1.91 |                              |
| tetR-03      | 42A |       |       |      | NoAmplification              |
| tetS         | 42A | 32.35 | 76.75 | 1.85 | MultipleMeltPeaks            |

|             |     |       |       |      |                              |
|-------------|-----|-------|-------|------|------------------------------|
| tetT        | 42A |       |       |      | NoAmplification              |
| tetU-01     | 42A |       |       |      | NoAmplification              |
| tetV        | 42A |       |       |      | NoAmplification              |
| tetW-01     | 42A | 28.35 | 81.66 | 1.97 |                              |
| tetX        | 42A |       |       |      | BadR2, CtIsSmall, Saturatio  |
| tnpA-01     | 42A |       |       |      | NoAmplification              |
| tnpA-02     | 42A | 37.1  | 84.76 | 1.68 | MultipleMeltPeaks            |
| tnpA-03     | 42A | 31.93 | 75.32 | 2.12 |                              |
| tnpA-04     | 42A |       |       |      | CurveFitFailed               |
| tnpA-05     | 42A | 37.89 | 80.5  | 1.74 |                              |
| tnpA-07     | 42A |       |       |      | NoAmplification              |
| tolC-01     | 42A |       |       |      | BadR2, LowEfficiency, CtIsS  |
| tolC-02     | 42A | 28.08 | 87.89 | 2    | MultipleMeltPeaks            |
| tolC-03     | 42A | 30.9  | 89.63 | 1.92 |                              |
| Tp614       | 42A | 33.86 | 82.91 | 1.86 | MultipleMeltPeaks            |
| ttgA        | 42A | 31.16 | 89.21 | 1.78 |                              |
| ttgB        | 42A | 30.6  | 89.17 | 1.89 |                              |
| vanA        | 42A |       |       |      | NoAmplification              |
| vanB-01     | 42A | 25.51 | 90.31 | 2.05 |                              |
| vanC-01     | 42A |       |       |      | CurveFitFailed               |
| vanC-02     | 42A |       |       |      | LowEfficiency, CtIsSmall, Se |
| vanC-03     | 42A | 24.83 | 91.03 | 1.93 |                              |
| vanC1       | 42A |       |       |      | NoAmplification              |
| vanC2/vanC3 | 42A | 34.24 | 78.71 | 2.03 |                              |
| vanG        | 42A |       |       |      | NoAmplification              |
| vanHB       | 42A | 29.37 | 89.76 | 1.93 |                              |
| vanHD       | 42A | 28.49 | 88.36 | 1.74 |                              |
| vanRA-01    | 42A |       |       |      | NoAmplification              |
| vanRA-02    | 42A |       |       |      | NoAmplification              |
| vanRB       | 42A | 30.7  | 86.72 | 1.97 |                              |
| vanRC       | 42A |       |       |      | NoAmplification              |
| vanRC4      | 42A |       |       |      | NoAmplification              |
| vanRD       | 42A |       |       |      | BadR2, CtIsSmall, Saturatio  |
| vanSA       | 42A |       |       |      | NoAmplification              |
| vanSB       | 42A | 32.21 | 74.1  | 1.92 | MultipleMeltPeaks            |
| vanSC-01    | 42A | 40.88 | 83.99 | 1.74 |                              |
| vanSC-02    | 42A |       |       |      | NoAmplification              |
| vanTC-01    | 42A |       |       |      | NoAmplification              |
| vanTC-02    | 42A | 31.79 | 91.24 | 1.82 |                              |
| vanTE       | 42A | 35.73 | 90.86 | 1.69 |                              |
| vanTG       | 42A |       |       |      | BadR2, CtIsSmall, Saturatio  |
| vanWB       | 42A |       |       |      | NoAmplification              |
| vanWG       | 42A | 37.25 | 74.14 | 1.87 |                              |
| vanXA       | 42A |       |       |      | CurveFitFailed               |
| vanXB       | 42A |       |       |      | NoAmplification              |
| vanXD       | 42A | 33.85 | 74.88 | 2.01 |                              |

|              |     |       |       |      |                             |
|--------------|-----|-------|-------|------|-----------------------------|
| vanYB        | 42A | 40.38 | 81.24 | 1.78 |                             |
| vanYD-01     | 42A | 32.59 | 86.76 | 1.87 |                             |
| vanYD-02     | 42A | 40.99 | 64.81 | 1.73 | MultipleMeltPeaks           |
| vatB-01      | 42A |       |       |      | NoAmplification             |
| vatB-02      | 42A |       |       |      | NoAmplification             |
| vatC-01      | 42A |       |       |      | BadR2, LowEfficiency, CtIsS |
| vatC-02      | 42A | 36.69 | 83.22 | 1.82 |                             |
| vatE-01      | 42A | 29.6  | 76.81 | 1.85 | MultipleMeltPeaks           |
| vatE-02      | 42A |       |       |      | NoAmplification             |
| vgaA-01      | 42A |       |       |      | NoAmplification             |
| vgaA-02      | 42A |       |       |      | BadR2, LowEfficiency, CtIsS |
| vgb-01       | 42A | 35.48 | 75.26 | 1.9  |                             |
| vgbB-01      | 42A |       |       |      | NoAmplification             |
| vgbB-02      | 42A |       |       |      | NoAmplification             |
| yceE/mdtG-0  | 42A |       |       |      | BadR2, LowEfficiency, CtIsS |
| yceE/mdtG-0  | 42A |       |       |      | CurveFitFailed              |
| yceL/mdtH-0  | 42A | 31.76 | 91.17 | 1.91 | MultipleMeltPeaks           |
| yceL/mdtH-0  | 42A |       |       |      | NoAmplification             |
| yceL/mdtH-0  | 42A | 33.24 | 88.19 | 1.78 | MultipleMeltPeaks           |
| yidY/mdtL-01 | 42A | 31.1  | 89.89 | 2.01 | MultipleMeltPeaks           |
| yidY/mdtL-02 | 42A |       |       |      | NoAmplification             |































| Assay           | Sample | Ct | Tm    | Efficiency | flag                   |
|-----------------|--------|----|-------|------------|------------------------|
| 16S rRNA        | 42B    |    | 13.51 | 82.37      | 1.96                   |
| aac             | 42B    |    | 31.29 | 81.99      | 1.91                   |
| aac(6')-Ib(akz) | 42B    |    |       |            | NoAmplification        |
| aac(6')-Ib(akz) | 42B    |    | 30.15 | 78.36      | 1.95 MultipleMeltPeaks |
| aac(6')-Ib(akz) | 42B    |    |       |            | CurveFitFailed         |
| aac(6')-II      | 42B    |    | 34.44 | 77.09      | 1.88                   |
| aac(6')I1       | 42B    |    | 36.81 | 89.4       | 1.68                   |
| aacA/aphD       | 42B    |    |       |            | NoAmplification        |
| aacC            | 42B    |    | 30.39 | 87.14      | 1.87                   |
| aacC1           | 42B    |    |       |            | NoAmplification        |
| aacC2           | 42B    |    |       |            | NoAmplification        |
| aacC4           | 42B    |    | 32.46 | 89.41      | 1.89                   |
| aadA-01         | 42B    |    |       |            | CurveFitFailed         |
| aadA-02         | 42B    |    | 33.45 | 85.36      | 1.9                    |
| aadA-1-01       | 42B    |    |       |            | NoAmplification        |
| aadA-1-02       | 42B    |    |       |            | NoAmplification        |
| aadA1           | 42B    |    |       |            | NoAmplification        |
| aadA2-01        | 42B    |    |       |            | NoAmplification        |
| aadA2-02        | 42B    |    | 32.13 | 75.48      | 2.05                   |
| aadA2-03        | 42B    |    | 38.35 | 86.06      | 1.74                   |
| aadA5-01        | 42B    |    | 36.1  | 81.24      | 1.85                   |
| aadA5-02        | 42B    |    | 38.37 | 87.55      | 1.71                   |
| aadA9-01        | 42B    |    |       |            | CurveFitFailed         |
| aadA9-02        | 42B    |    |       |            | NoAmplification        |
| aadD            | 42B    |    |       |            | NoAmplification        |
| aadE            | 42B    |    |       |            | NoAmplification        |
| acrA-01         | 42B    |    | 28.33 | 82.85      | 1.93                   |
| acrA-02         | 42B    |    | 33.01 | 88.14      | 1.88                   |
| acrA-03         | 42B    |    | 33.61 | 88.2       | 1.81 MultipleMeltPeaks |
| acrA-04         | 42B    |    | 33.03 | 79.98      | 1.87 MultipleMeltPeaks |
| acrA-05         | 42B    |    | 31.88 | 88.44      | 1.92                   |
| acrB-01         | 42B    |    | 32.89 | 82.37      | 1.99 MultipleMeltPeaks |
| acrF            | 42B    |    | 44.66 | 79.9       | 1.69 MultipleMeltPeaks |
| acrR-01         | 42B    |    | 31.57 | 80.58      | 1.9                    |
| acrR-02         | 42B    |    | 36.24 | 88.21      | 1.77 MultipleMeltPeaks |
| Actin           | 42B    |    | 23.92 | 87.19      | 1.91                   |
| adeA            | 42B    |    | 38.59 | 85.64      | 1.78                   |
| ampC-01         | 42B    |    | 30.41 | 81.16      | 1.97                   |
| ampC-02         | 42B    |    | 34.09 | 89.11      | 1.86                   |
| ampC-04         | 42B    |    | 35.21 | 82.22      | 1.96                   |
| ampC-05         | 42B    |    |       |            | NoAmplification        |
| ampC-06         | 42B    |    |       |            | NoAmplification        |
| ampC-07         | 42B    |    |       |            | CurveFitFailed         |
| ampC-09         | 42B    |    | 38.38 | 88.31      | 1.63                   |
| ampC/blaDH      | 42B    |    | 34.53 | 77.59      | 1.91 MultipleMeltPeaks |

|                            |     |       |       |      |                   |
|----------------------------|-----|-------|-------|------|-------------------|
| aph                        | 42B |       |       |      | NoAmplification   |
| aph(2')-Id-01              | 42B |       |       |      | NoAmplification   |
| aph(2')-Id-02              | 42B |       |       |      | NoAmplification   |
| aph6ia                     | 42B | 26.46 | 78.5  | 1.98 |                   |
| aphA1(aka k <sub>z</sub> ) | 42B |       |       |      | NoAmplification   |
| bacA-01                    | 42B |       |       |      | CurveFitFailed    |
| bacA-02                    | 42B | 35.25 | 86    | 1.76 | MultipleMeltPeaks |
| BETA-globin                | 42B | 25.27 | 84.07 | 1.99 |                   |
| bla-ACC-1                  | 42B |       |       |      | CurveFitFailed    |
| bla-L1                     | 42B | 35.09 | 80.11 | 1.84 | MultipleMeltPeaks |
| bla1                       | 42B | 39.01 | 80.02 | 1.86 | MultipleMeltPeaks |
| blaCMY                     | 42B | 31.54 | 80.47 | 1.93 |                   |
| blaCMY2-01                 | 42B | 36.83 | 75.15 | 1.87 |                   |
| blaCMY2-02                 | 42B | 33.18 | 81.64 | 1.93 | MultipleMeltPeaks |
| blaCTX-M-01                | 42B |       |       |      | CurveFitFailed    |
| blaCTX-M-02                | 42B | 32.92 | 91.31 | 1.85 |                   |
| blaCTX-M-03                | 42B |       |       |      | CurveFitFailed    |
| blaCTX-M-04                | 42B | 31.12 | 84.79 | 1.94 | MultipleMeltPeaks |
| blaCTX-M-05                | 42B | 35.91 | 75.84 | 1.62 |                   |
| blaCTX-M-06                | 42B | 38.59 | 82.05 | 1.99 | MultipleMeltPeaks |
| blaGES                     | 42B |       |       |      | NoAmplification   |
| blaIMP-01                  | 42B |       |       |      | NoAmplification   |
| blaIMP-02                  | 42B |       |       |      | NoAmplification   |
| blaMOX/blaC                | 42B |       |       |      | NoAmplification   |
| blaOCH                     | 42B | 31.58 | 83.88 | 1.97 | MultipleMeltPeaks |
| blaOKP                     | 42B |       |       |      | NoAmplification   |
| blaOXA1/blaC               | 42B |       |       |      | NoAmplification   |
| blaOXA10-01                | 42B |       |       |      | NoAmplification   |
| blaOXA10-02                | 42B |       |       |      | CurveFitFailed    |
| blaOXY                     | 42B | 34.3  | 89.97 | 1.7  |                   |
| blaPAO                     | 42B |       |       |      | NoAmplification   |
| blaPER                     | 42B |       |       |      | CurveFitFailed    |
| blaPSE                     | 42B |       |       |      | NoAmplification   |
| blaROB                     | 42B | 33.98 | 81.92 | 1.89 | MultipleMeltPeaks |
| blaSFO                     | 42B | 28.24 | 87.78 | 1.8  | MultipleMeltPeaks |
| blaSHV-01                  | 42B | 28.97 | 84.64 | 2.01 |                   |
| blaSHV-02                  | 42B | 27.6  | 85.93 | 1.98 |                   |
| blaTEM                     | 42B |       |       |      | NoAmplification   |
| blaTLA                     | 42B |       |       |      | NoAmplification   |
| blaVEB                     | 42B |       |       |      | NoAmplification   |
| blaVIM                     | 42B | 37.68 | 80.72 | 2.14 | MultipleMeltPeaks |
| blaZ                       | 42B |       |       |      | NoAmplification   |
| carB                       | 42B | 34.14 | 78.59 | 1.96 |                   |
| catA1                      | 42B |       |       |      | NoAmplification   |
| catB3                      | 42B |       |       |      | NoAmplification   |
| catB8                      | 42B | 37.76 | 80.3  | 1.78 |                   |

|            |     |       |       |      |                              |
|------------|-----|-------|-------|------|------------------------------|
| ceoA       | 42B | 30.35 | 82.47 | 1.99 |                              |
| cepA       | 42B |       |       |      | NoAmplification              |
| cfiA       | 42B | 38.33 | 84.83 | 1.69 |                              |
| cfr        | 42B |       |       |      | CurveFitFailed               |
| cfxA       | 42B | 20.32 | 77.67 | 2.04 |                              |
| cmeA       | 42B |       |       |      | CurveFitFailed               |
| cmlA1-01   | 42B | 32.52 | 89.62 | 1.94 | MultipleMeltPeaks            |
| cmlA1-02   | 42B | 31.88 | 89.72 | 1.95 | MultipleMeltPeaks            |
| cmr        | 42B |       |       |      | NoAmplification              |
| cmx(A)     | 42B | 29.04 | 83.68 | 1.96 | MultipleMeltPeaks            |
| cphA-01    | 42B | 35.31 | 88.88 | 1.82 |                              |
| cphA-02    | 42B | 33.45 | 81.53 | 1.9  |                              |
| dfrA1      | 42B |       |       |      | NoAmplification              |
| dfrA12     | 42B | 36.05 | 85.91 | 1.62 |                              |
| emrD       | 42B | 35.57 | 85.91 | 1.8  | MultipleMeltPeaks            |
| ereA       | 42B |       |       |      | NoAmplification              |
| ereB       | 42B |       |       |      | CurveFitFailed               |
| erm(34)    | 42B | 34.72 | 90.72 | 1.87 |                              |
| erm(35)    | 42B |       |       |      | NoAmplification              |
| erm(36)    | 42B | 36.42 | 81.79 | 1.81 |                              |
| ermA       | 42B |       |       |      | NoAmplification              |
| ermA/ermTR | 42B |       |       |      | NoAmplification              |
| ermB       | 42B | 19.14 | 75.25 | 2.09 |                              |
| ermC       | 42B |       |       |      | NoAmplification              |
| ermF       | 42B |       |       |      | NoAmplification              |
| ermJ/ermD  | 42B |       |       |      | CurveFitFailed               |
| ermK-01    | 42B |       |       |      | CurveFitFailed               |
| ermK-02    | 42B | 38    | 89.95 | 1.62 |                              |
| ermT-01    | 42B |       |       |      | NoAmplification              |
| ermT-02    | 42B |       |       |      | NoAmplification              |
| ermX       | 42B |       |       |      | NoAmplification              |
| ermY       | 42B | 34.59 | 86.06 | 1.94 |                              |
| fabK       | 42B | 23.84 | 79.46 | 2.16 |                              |
| floR       | 42B |       |       |      | NoAmplification              |
| folA       | 42B |       |       |      | NoAmplification              |
| fosB       | 42B |       |       |      | LowEfficiency, CtIsSmall, S: |
| fosX       | 42B |       |       |      | NoAmplification              |
| fox5       | 42B | 30.03 | 88.18 | 1.94 |                              |
| imiR       | 42B |       |       |      | NoAmplification              |
| ImrA-01    | 42B |       |       |      | CurveFitFailed               |
| intl       | 42B | 31.18 | 88.47 | 1.93 |                              |
| intl1      | 42B | 21.7  | 88.12 | 1.98 |                              |
| IS613      | 42B | 19.98 | 79.9  | 2.01 |                              |
| lnuA-01    | 42B |       |       |      | NoAmplification              |
| lnuB-01    | 42B |       |       |      | NoAmplification              |
| lnuB-02    | 42B |       |       |      | NoAmplification              |

|                |     |       |       |      |                   |
|----------------|-----|-------|-------|------|-------------------|
| lnuC           | 42B |       |       |      | CurveFitFailed    |
| marR-01        | 42B | 35.26 | 90.34 | 1.83 |                   |
| matA/mel       | 42B | 15.85 | 77.85 | 2.05 |                   |
| mdet1          | 42B |       |       |      | NoAmplification   |
| mdtA           | 42B |       |       |      | NoAmplification   |
| mdtE/yhiU      | 42B | 35.17 | 84.92 | 1.83 |                   |
| mecA           | 42B |       |       |      | NoAmplification   |
| mefA           | 42B | 15.09 | 80.61 | 1.98 | MultipleMeltPeaks |
| mepA           | 42B | 30.05 | 88.03 | 1.98 | MultipleMeltPeaks |
| mexA           | 42B | 33.22 | 74.85 | 1.98 |                   |
| mexD           | 42B | 36.59 | 84.41 | 1.88 | MultipleMeltPeaks |
| mexE           | 42B | 32.27 | 88.04 | 1.9  |                   |
| mexF           | 42B | 26.31 | 87.54 | 2.11 |                   |
| mphA-01        | 42B | 27.86 | 88.86 | 1.93 |                   |
| mphA-02        | 42B | 27.4  | 87.65 | 1.84 |                   |
| mphB           | 42B | 36.79 | 79.18 | 1.73 | MultipleMeltPeaks |
| mphC           | 42B |       |       |      | NoAmplification   |
| msrA-01        | 42B | 40.96 | 72.53 | 1.84 |                   |
| msrC-01        | 42B |       |       |      | NoAmplification   |
| mtrC-01        | 42B |       |       |      | CurveFitFailed    |
| mtrC-02        | 42B |       |       |      | NoAmplification   |
| mtrD-02        | 42B | 28.81 | 82.78 | 1.98 |                   |
| mtrD-03        | 42B | 32.2  | 80.27 | 1.84 |                   |
| NDM1           | 42B | 39.73 | 63.97 | 1.44 | MultipleMeltPeaks |
| nimE           | 42B |       |       |      | CurveFitFailed    |
| nisB           | 42B |       |       |      | NoAmplification   |
| oleC           | 42B | 35.68 | 87.91 | 1.81 |                   |
| oprD           | 42B | 26.96 | 88.65 | 1.97 | MultipleMeltPeaks |
| oprJ           | 42B | 26.61 | 88.39 | 1.92 | MultipleMeltPeaks |
| pbp            | 42B |       |       |      | NoAmplification   |
| pbp2x          | 42B | 26.27 | 75.27 | 2    |                   |
| Pbp5           | 42B |       |       |      | NoAmplification   |
| penA           | 42B | 34.21 | 85.83 | 1.56 |                   |
| pikR1          | 42B | 36.13 | 85.49 | 1.85 | MultipleMeltPeaks |
| pikR2          | 42B | 31.82 | 88.79 | 1.97 |                   |
| pmrA           | 42B | 18.53 | 79.77 | 2.09 |                   |
| pncA           | 42B | 23.03 | 89.49 | 1.86 |                   |
| putative multi | 42B | 36.72 | 77.13 | 1.83 | MultipleMeltPeaks |
| qac            | 42B |       |       |      | CurveFitFailed    |
| qacA           | 42B | 35.3  | 70.47 | 1.83 |                   |
| qacA/qacB      | 42B |       |       |      | NoAmplification   |
| qacEdelta1-0   | 42B | 29.06 | 79.21 | 1.99 |                   |
| qacEdelta1-0   | 42B | 33.02 | 75.96 | 1.94 |                   |
| qacH-01        | 42B | 31.98 | 88.04 | 1.93 |                   |
| qacH-02        | 42B |       |       |      | NoAmplification   |
| qnrA           | 42B |       |       |      | NoAmplification   |

|              |     |       |       |      |                                          |
|--------------|-----|-------|-------|------|------------------------------------------|
| rarD-02      | 42B |       |       |      | NoAmplification                          |
| sat4         | 42B |       |       |      | CurveFitFailed                           |
| sdeB         | 42B |       |       |      | NoAmplification                          |
| spcN-01      | 42B | 38.06 | 83.45 | 1.82 |                                          |
| speA         | 42B |       |       |      | NoAmplification                          |
| str          | 42B |       |       |      | NoAmplification                          |
| strA         | 42B |       |       |      | NoAmplification                          |
| strB         | 42B |       |       |      | NoAmplification                          |
| sul1         | 42B | 40.88 | 88.71 | 1.47 |                                          |
| sul2         | 42B |       |       |      | CurveFitFailed                           |
| sulA/foIP-01 | 42B | 16.93 | 81.61 | 1.99 |                                          |
| sulA/foIP-03 | 42B | 17.77 | 82.73 | 2.01 |                                          |
| tet(32)      | 42B |       |       |      | NoAmplification                          |
| tet(34)      | 42B | 36.76 | 74.45 | 1.84 |                                          |
| tet(35)      | 42B |       |       |      | NoAmplification                          |
| tet(36)-A    | 42B |       |       |      | NoAmplification                          |
| tet(36)-B    | 42B |       |       |      | NoAmplification                          |
| tet(37)      | 42B | 23.05 | 76.71 | 1.99 |                                          |
| tetA-01      | 42B |       |       |      | NoAmplification                          |
| tetA-02      | 42B | 38.55 | 83.86 | 1.78 |                                          |
| tetB-01      | 42B |       |       |      | NoAmplification                          |
| tetB-02      | 42B |       |       |      | CurveFitFailed                           |
| tetC-01      | 42B |       |       |      | NoAmplification                          |
| tetC-02      | 42B | 40.86 | 75.88 | 1.76 |                                          |
| tetD-01      | 42B |       |       |      | NoAmplification                          |
| tetD-02      | 42B | 35.81 | 76.34 | 1.84 | MultipleMeltPeaks                        |
| tetE         | 42B | 32.7  | 86.12 | 1.93 |                                          |
| tetG-01      | 42B | 35.55 | 89.01 | 1.83 | MultipleMeltPeaks                        |
| tetG-02      | 42B | 33.11 | 91.69 | 1.92 | MultipleMeltPeaks                        |
| tetH         | 42B |       |       |      | NoAmplification                          |
| tetJ         | 42B |       |       |      | NoAmplification                          |
| tetK         | 42B |       |       |      | LowEfficiency, CtIsSmall, S <sub>c</sub> |
| tetL-01      | 42B |       |       |      | NoAmplification                          |
| tetL-02      | 42B | 38.74 | 85.5  | 1.62 |                                          |
| tetM-01      | 42B | 15.99 | 76.42 | 1.99 |                                          |
| tetM-02      | 42B | 15.99 | 77.64 | 2.01 | MultipleMeltPeaks                        |
| tetO-01      | 42B | 20.87 | 77.08 | 2.03 |                                          |
| tetPA        | 42B |       |       |      | NoAmplification                          |
| tetPB-01     | 42B | 36.38 | 79.03 | 1.87 |                                          |
| tetPB-02     | 42B | 32.51 | 85.57 | 1.97 |                                          |
| tetPB-03     | 42B |       |       |      | NoAmplification                          |
| tetPB-05     | 42B |       |       |      | NoAmplification                          |
| tetQ         | 42B | 20.6  | 76.22 | 2.02 |                                          |
| tetR-02      | 42B | 27.27 | 82.23 | 1.91 |                                          |
| tetR-03      | 42B |       |       |      | NoAmplification                          |
| tetS         | 42B | 34.15 | 87.32 | 1.94 |                                          |

|             |     |       |       |      |                   |
|-------------|-----|-------|-------|------|-------------------|
| tetT        | 42B |       |       |      | CurveFitFailed    |
| tetU-01     | 42B |       |       |      | NoAmplification   |
| tetV        | 42B |       |       |      | NoAmplification   |
| tetW-01     | 42B | 22.58 | 81.99 | 1.99 |                   |
| tetX        | 42B |       |       |      | NoAmplification   |
| tnpA-01     | 42B |       |       |      | NoAmplification   |
| tnpA-02     | 42B |       |       |      | CurveFitFailed    |
| tnpA-03     | 42B | 25.49 | 78    | 2.11 |                   |
| tnpA-04     | 42B | 29.28 | 82.22 | 1.93 |                   |
| tnpA-05     | 42B | 29    | 80.82 | 1.92 |                   |
| tnpA-07     | 42B |       |       |      | NoAmplification   |
| tolC-01     | 42B | 38.66 | 75.88 | 1.82 |                   |
| tolC-02     | 42B | 28.44 | 87.54 | 1.96 |                   |
| tolC-03     | 42B | 33.88 | 81.37 | 1.9  |                   |
| Tp614       | 42B |       |       |      | CurveFitFailed    |
| ttgA        | 42B | 35.76 | 76.93 | 1.9  |                   |
| ttgB        | 42B | 35.47 | 81.67 | 1.86 |                   |
| vanA        | 42B |       |       |      | NoAmplification   |
| vanB-01     | 42B | 30.65 | 84.4  | 2.02 |                   |
| vanC-01     | 42B |       |       |      | NoAmplification   |
| vanC-02     | 42B |       |       |      | NoAmplification   |
| vanC-03     | 42B | 27.26 | 91.72 | 1.94 |                   |
| vanC1       | 42B |       |       |      | NoAmplification   |
| vanC2/vanC3 | 42B |       |       |      | CurveFitFailed    |
| vanG        | 42B |       |       |      | NoAmplification   |
| vanHB       | 42B | 37.48 | 89.76 | 1.7  | MultipleMeltPeaks |
| vanHD       | 42B |       |       |      | CurveFitFailed    |
| vanRA-01    | 42B |       |       |      | NoAmplification   |
| vanRA-02    | 42B |       |       |      | NoAmplification   |
| vanRB       | 42B | 36.73 | 87    | 1.77 |                   |
| vanRC       | 42B |       |       |      | NoAmplification   |
| vanRC4      | 42B |       |       |      | NoAmplification   |
| vanRD       | 42B | 36.34 | 75.95 | 1.83 |                   |
| vanSA       | 42B |       |       |      | NoAmplification   |
| vanSB       | 42B | 39.19 | 73.08 | 1.86 |                   |
| vanSC-01    | 42B | 30.73 | 77.94 | 2.06 |                   |
| vanSC-02    | 42B |       |       |      | NoAmplification   |
| vanTC-01    | 42B |       |       |      | NoAmplification   |
| vanTC-02    | 42B | 34.65 | 84.01 | 1.79 | MultipleMeltPeaks |
| vanTE       | 42B | 32.36 | 88.77 | 1.92 |                   |
| vanTG       | 42B |       |       |      | NoAmplification   |
| vanWB       | 42B |       |       |      | NoAmplification   |
| vanWG       | 42B | 33.17 | 74.74 | 1.95 |                   |
| vanXA       | 42B | 32.99 | 73.66 | 1.86 |                   |
| vanXB       | 42B | 34.86 | 75.63 | 1.96 |                   |
| vanXD       | 42B | 33.3  | 75    | 2    |                   |

|              |     |       |       |      |                   |
|--------------|-----|-------|-------|------|-------------------|
| vanYB        | 42B |       |       |      | NoAmplification   |
| vanYD-01     | 42B |       |       |      | CurveFitFailed    |
| vanYD-02     | 42B |       |       |      | NoAmplification   |
| vatB-01      | 42B |       |       |      | NoAmplification   |
| vatB-02      | 42B |       |       |      | NoAmplification   |
| vatC-01      | 42B | 36.08 | 63.11 | 2.19 | MultipleMeltPeaks |
| vatC-02      | 42B | 36.29 | 89.67 | 1.76 |                   |
| vatE-01      | 42B | 29.06 | 76.56 | 2.13 |                   |
| vatE-02      | 42B | 36.24 | 75.98 | 2.05 |                   |
| vgaA-01      | 42B |       |       |      | CurveFitFailed    |
| vgaA-02      | 42B |       |       |      | CurveFitFailed    |
| vgb-01       | 42B | 32.82 | 83.25 | 1.9  |                   |
| vgbB-01      | 42B | 33.15 | 74.57 | 2.03 |                   |
| vgbB-02      | 42B |       |       |      | NoAmplification   |
| yceE/mdtG-0  | 42B |       |       |      | NoAmplification   |
| yceE/mdtG-0  | 42B |       |       |      | NoAmplification   |
| yceL/mdtH-0  | 42B | 32.56 | 82.48 | 1.88 | MultipleMeltPeaks |
| yceL/mdtH-0  | 42B |       |       |      | NoAmplification   |
| yceL/mdtH-0  | 42B | 32.37 | 81.87 | 1.9  |                   |
| yidY/mdtL-01 | 42B | 30.25 | 82.46 | 1.93 |                   |
| yidY/mdtL-02 | 42B | 33.26 | 92.55 | 1.87 |                   |































| Assay          | Sample | Ct | Tm    | Efficiency | flag                         |
|----------------|--------|----|-------|------------|------------------------------|
| 16S rRNA       | 42C    |    | 14.72 | 82.43      | 1.97                         |
| aac            | 42C    |    | 32.59 | 86.28      | 1.74 MultipleMeltPeaks       |
| aac(6')-Ib(akz | 42C    |    |       |            | LowEfficiency, CtIsSmall, S: |
| aac(6')-Ib(akz | 42C    |    | 30.68 | 86.07      | 1.98 MultipleMeltPeaks       |
| aac(6')-Ib(akz | 42C    |    | 33.54 | 81.17      | 1.88 MultipleMeltPeaks       |
| aac(6')-II     | 42C    |    | 36.61 | 88.13      | 1.69 MultipleMeltPeaks       |
| aac(6')I1      | 42C    |    | 36.53 | 85.84      | 1.72                         |
| aacA/aphD      | 42C    |    | 28.95 | 72         | 2.08                         |
| aacC           | 42C    |    | 31    | 90.37      | 1.96                         |
| aacC1          | 42C    |    |       |            | NoAmplification              |
| aacC2          | 42C    |    |       |            | NoAmplification              |
| aacC4          | 42C    |    | 31.94 | 89.38      | 1.91                         |
| aadA-01        | 42C    |    |       |            | CurveFitFailed               |
| aadA-02        | 42C    |    | 34.17 | 80.45      | 1.94 MultipleMeltPeaks       |
| aadA-1-01      | 42C    |    |       |            | NoAmplification              |
| aadA-1-02      | 42C    |    |       |            | LowEfficiency, CtIsSmall, C: |
| aadA1          | 42C    |    | 32.25 | 85.52      | 1.99                         |
| aadA2-01       | 42C    |    |       |            | CurveFitFailed               |
| aadA2-02       | 42C    |    | 31.76 | 75.55      | 2.03                         |
| aadA2-03       | 42C    |    | 36.55 | 86.11      | 1.83                         |
| aadA5-01       | 42C    |    | 35.19 | 81.24      | 1.89 MultipleMeltPeaks       |
| aadA5-02       | 42C    |    | 31.54 | 88.25      | 2.05                         |
| aadA9-01       | 42C    |    | 36.81 | 84.43      | 1.82                         |
| aadA9-02       | 42C    |    |       |            | CurveFitFailed               |
| aadD           | 42C    |    |       |            | LowEfficiency, CtIsSmall, C: |
| aadE           | 42C    |    |       |            | LowEfficiency, CtIsSmall, S: |
| acrA-01        | 42C    |    | 29.04 | 88.72      | 1.93 MultipleMeltPeaks       |
| acrA-02        | 42C    |    | 35.58 | 88.35      | 1.77                         |
| acrA-03        | 42C    |    | 38.44 | 88.43      | 1.63 MultipleMeltPeaks       |
| acrA-04        | 42C    |    | 32.82 | 80.17      | 1.96 MultipleMeltPeaks       |
| acrA-05        | 42C    |    | 31.7  | 88.51      | 1.94                         |
| acrB-01        | 42C    |    | 31.86 | 80.96      | 1.99 MultipleMeltPeaks       |
| acrF           | 42C    |    | 32.11 | 87.2       | 1.96                         |
| acrR-01        | 42C    |    | 38.56 | 87.96      | 1.71                         |
| acrR-02        | 42C    |    | 38.79 | 85.12      | 1.74                         |
| Actin          | 42C    |    | 21.62 | 87.15      | 1.94                         |
| adeA           | 42C    |    | 38.51 | 78.05      | 1.96                         |
| ampC-01        | 42C    |    | 31.88 | 85.57      | 2.02                         |
| ampC-02        | 42C    |    | 36.44 | 84.85      | 1.83 MultipleMeltPeaks       |
| ampC-04        | 42C    |    | 33.34 | 78.46      | 1.88                         |
| ampC-05        | 42C    |    |       |            | CurveFitFailed               |
| ampC-06        | 42C    |    | 37.11 | 90.36      | 1.81 MultipleMeltPeaks       |
| ampC-07        | 42C    |    |       |            | CurveFitFailed               |
| ampC-09        | 42C    |    |       |            | LowEfficiency, CtIsSmall, S: |
| ampC/blaDH     | 42C    |    | 30.2  | 77.81      | 1.98 MultipleMeltPeaks       |

|               |     |       |       |      |                              |
|---------------|-----|-------|-------|------|------------------------------|
| aph           | 42C |       |       |      | LowEfficiency, CtIsSmall, S: |
| aph(2')-Id-01 | 42C |       |       |      | CurveFitFailed               |
| aph(2')-Id-02 | 42C |       |       |      | LowEfficiency, CtIsSmall, S: |
| aph6ia        | 42C | 26.4  | 78.65 | 1.99 |                              |
| aphA1(aka k   | 42C | 28.34 | 76.39 | 2.07 |                              |
| bacA-01       | 42C |       |       |      | LowEfficiency, CtIsSmall, S: |
| bacA-02       | 42C | 40.72 | 88.22 | 1.65 | MultipleMeltPeaks            |
| BETA-globin   | 42C | 23.03 | 84.09 | 1.99 |                              |
| bla-ACC-1     | 42C |       |       |      | CurveFitFailed               |
| bla-L1        | 42C | 31.35 | 85.99 | 1.98 |                              |
| bla1          | 42C |       |       |      | LowEfficiency, CtIsSmall, S: |
| blaCMY        | 42C | 35.87 | 80.28 | 1.85 |                              |
| blaCMY2-01    | 42C |       |       |      | LowEfficiency, CtIsSmall, S: |
| blaCMY2-02    | 42C | 31.07 | 83.76 | 1.99 | MultipleMeltPeaks            |
| blaCTX-M-01   | 42C | 33.74 | 85.28 | 1.93 |                              |
| blaCTX-M-02   | 42C | 33.66 | 90.76 | 1.84 | MultipleMeltPeaks            |
| blaCTX-M-03   | 42C |       |       |      | CurveFitFailed               |
| blaCTX-M-04   | 42C | 29.78 | 90.8  | 2.02 | MultipleMeltPeaks            |
| blaCTX-M-05   | 42C | 36.87 | 75.72 | 1.6  |                              |
| blaCTX-M-06   | 42C |       |       |      | NoAmplification              |
| blaGES        | 42C |       |       |      | LowEfficiency, CtIsSmall, S: |
| blaIMP-01     | 42C |       |       |      | NoAmplification              |
| blaIMP-02     | 42C | 39.87 | 78.71 | 1.8  |                              |
| blaMOX/blaC   | 42C |       |       |      | BadR2, LowEfficiency, CtIsS  |
| blaOCH        | 42C | 29.46 | 86.32 | 1.99 |                              |
| blaOKP        | 42C |       |       |      | NoAmplification              |
| blaOXA1/blaC  | 42C |       |       |      | LowEfficiency, CtIsSmall, S: |
| blaOXA10-01   | 42C |       |       |      | CurveFitFailed               |
| blaOXA10-02   | 42C | 36.62 | 81.62 | 1.8  |                              |
| blaOXY        | 42C | 38.07 | 90.02 | 1.6  |                              |
| blaPAO        | 42C |       |       |      | NoAmplification              |
| blaPER        | 42C |       |       |      | LowEfficiency, CtIsSmall, S: |
| blaPSE        | 42C |       |       |      | CurveFitFailed               |
| blaROB        | 42C | 31.65 | 87.44 | 1.98 |                              |
| blaSFO        | 42C | 29.69 | 89.86 | 1.78 | MultipleMeltPeaks            |
| blaSHV-01     | 42C |       |       |      | CurveFitFailed               |
| blaSHV-02     | 42C |       |       |      | LowEfficiency, CtIsSmall, S: |
| blaTEM        | 42C | 27.59 | 79.62 | 2.01 |                              |
| blaTLA        | 42C |       |       |      | LowEfficiency, CtIsSmall, S: |
| blaVEB        | 42C |       |       |      | NoAmplification              |
| blaVIM        | 42C | 37.68 | 85.04 | 2.04 |                              |
| blaZ          | 42C |       |       |      | CurveFitFailed               |
| carB          | 42C | 33.91 | 78.76 | 1.97 |                              |
| catA1         | 42C |       |       |      | NoAmplification              |
| catB3         | 42C | 29.83 | 87.67 | 1.93 |                              |
| catB8         | 42C | 31.57 | 82.44 | 1.99 |                              |

|            |     |       |       |      |                              |
|------------|-----|-------|-------|------|------------------------------|
| ceoA       | 42C | 27.22 | 86.73 | 1.94 | MultipleMeltPeaks            |
| cepA       | 42C |       |       |      | LowEfficiency, CtIsSmall, Ct |
| cfiA       | 42C | 34.79 | 87.61 | 1.83 |                              |
| cfr        | 42C |       |       |      | CurveFitFailed               |
| cfxA       | 42C | 20.67 | 77.7  | 2.04 |                              |
| cmeA       | 42C |       |       |      | LowEfficiency, CtIsSmall, S: |
| cmlA1-01   | 42C | 35.88 | 87.54 | 1.88 |                              |
| cmlA1-02   | 42C | 30.9  | 89.73 | 1.91 | MultipleMeltPeaks            |
| cmr        | 42C |       |       |      | CurveFitFailed               |
| cmx(A)     | 42C | 27.22 | 84.93 | 1.98 | MultipleMeltPeaks            |
| cphA-01    | 42C | 31.77 | 88.51 | 1.89 |                              |
| cphA-02    | 42C |       |       |      | CurveFitFailed               |
| dfrA1      | 42C |       |       |      | NoAmplification              |
| dfrA12     | 42C | 33.97 | 85.94 | 1.65 |                              |
| emrD       | 42C | 37.96 | 82    | 1.74 | MultipleMeltPeaks            |
| ereA       | 42C | 36.13 | 82.76 | 1.85 |                              |
| ereB       | 42C |       |       |      | CurveFitFailed               |
| erm(34)    | 42C | 39.47 | 86.02 | 1.72 |                              |
| erm(35)    | 42C |       |       |      | LowEfficiency, CtIsSmall, S: |
| erm(36)    | 42C |       |       |      | LowEfficiency, CtIsSmall, S: |
| ermA       | 42C | 34.79 | 74.6  | 2.03 |                              |
| ermA/ermTR | 42C |       |       |      | NoAmplification              |
| ermB       | 42C | 19.33 | 75.25 | 2.11 |                              |
| ermC       | 42C | 28.89 | 75.81 | 2.08 |                              |
| ermF       | 42C |       |       |      | LowEfficiency, CtIsSmall, S: |
| ermJ/ermD  | 42C |       |       |      | CurveFitFailed               |
| ermK-01    | 42C |       |       |      | CurveFitFailed               |
| ermK-02    | 42C | 36.83 | 85.61 | 1.79 | MultipleMeltPeaks            |
| ermT-01    | 42C |       |       |      | CurveFitFailed               |
| ermT-02    | 42C | 37.2  | 88.75 | 1.76 |                              |
| ermX       | 42C |       |       |      | CurveFitFailed               |
| ermY       | 42C |       |       |      | LowEfficiency, CtIsSmall, S: |
| fabK       | 42C | 23.65 | 79.56 | 2.19 |                              |
| floR       | 42C | 32.58 | 89.78 | 1.85 |                              |
| folA       | 42C |       |       |      | NoAmplification              |
| fosB       | 42C |       |       |      | LowEfficiency, CtIsSmall, S: |
| fosX       | 42C |       |       |      | CurveFitFailed               |
| fox5       | 42C | 29.92 | 86.22 | 1.98 |                              |
| imiR       | 42C |       |       |      | NoAmplification              |
| ImrA-01    | 42C |       |       |      | NoAmplification              |
| intl       | 42C | 30.98 | 88.63 | 1.97 | MultipleMeltPeaks            |
| intl1      | 42C | 21.32 | 87.46 | 2.01 |                              |
| IS613      | 42C | 20.01 | 79.94 | 2.03 |                              |
| lnuA-01    | 42C |       |       |      | LowEfficiency, CtIsSmall, S: |
| lnuB-01    | 42C |       |       |      | LowEfficiency, CtIsSmall, S: |
| lnuB-02    | 42C |       |       |      | CurveFitFailed               |

|                |     |       |       |      |                              |
|----------------|-----|-------|-------|------|------------------------------|
| lnuC           | 42C | 30.96 | 73.47 | 2.02 |                              |
| marR-01        | 42C | 33.64 | 85.23 | 1.88 |                              |
| matA/mel       | 42C | 17.77 | 77.86 | 2.06 |                              |
| mdet1          | 42C |       |       |      | CurveFitFailed               |
| mdtA           | 42C | 37.05 | 86.48 | 1.77 | MultipleMeltPeaks            |
| mdtE/yhiU      | 42C | 34.68 | 90.66 | 1.77 |                              |
| mecA           | 42C |       |       |      | LowEfficiency, CtIsSmall, S: |
| mefA           | 42C | 17.09 | 80.72 |      | 2 MultipleMeltPeaks          |
| mepA           | 42C | 31.55 | 88.87 | 2.02 |                              |
| mexA           | 42C |       |       |      | CurveFitFailed               |
| mexD           | 42C | 33.61 | 80.2  | 2.02 |                              |
| mexE           | 42C | 33.61 | 87.4  | 1.9  |                              |
| mexF           | 42C | 26.48 | 89.94 | 2.17 |                              |
| mphA-01        | 42C | 28.9  | 89.21 | 2    |                              |
| mphA-02        | 42C | 29.94 | 87.32 | 1.76 |                              |
| mphB           | 42C |       |       |      | CurveFitFailed               |
| mphC           | 42C |       |       |      | CurveFitFailed               |
| msrA-01        | 42C |       |       |      | LowEfficiency, CtIsSmall, S: |
| msrC-01        | 42C |       |       |      | NoAmplification              |
| mtrC-01        | 42C | 40.19 | 83.65 | 1.76 |                              |
| mtrC-02        | 42C |       |       |      | LowEfficiency, CtIsSmall, S: |
| mtrD-02        | 42C | 27.66 | 85.41 | 2.03 |                              |
| mtrD-03        | 42C | 28.55 | 80.34 | 1.81 | MultipleMeltPeaks            |
| NDM1           | 42C |       |       |      | LowEfficiency, CtIsSmall, S: |
| nimE           | 42C |       |       |      | LowEfficiency, CtIsSmall, C: |
| nisB           | 42C |       |       |      | LowEfficiency, CtIsSmall, C: |
| oleC           | 42C | 34.39 | 87.87 | 1.82 | MultipleMeltPeaks            |
| oprD           | 42C | 27.31 | 88.31 | 1.99 | MultipleMeltPeaks            |
| oprJ           | 42C | 28.91 | 89.82 | 1.92 | MultipleMeltPeaks            |
| pbp            | 42C |       |       |      | LowEfficiency, CtIsSmall, S: |
| pbp2x          | 42C | 25.3  | 75.35 | 1.94 |                              |
| Pbp5           | 42C |       |       |      | CurveFitFailed               |
| penA           | 42C | 36.24 | 85.98 | 1.55 |                              |
| pikR1          | 42C |       |       |      | CurveFitFailed               |
| pikR2          | 42C | 32.22 | 84.83 | 1.92 |                              |
| pmrA           | 42C | 20.35 | 79.99 | 2.07 |                              |
| pncA           | 42C | 24.47 | 89.58 | 1.88 |                              |
| putative multi | 42C | 34.93 | 84.21 | 1.91 | MultipleMeltPeaks            |
| qac            | 42C |       |       |      | LowEfficiency, CtIsSmall, S: |
| qacA           | 42C | 29.58 | 80.99 | 2.02 |                              |
| qacA/qacB      | 42C |       |       |      | CurveFitFailed               |
| qacEdelta1-0   | 42C |       |       |      | CurveFitFailed               |
| qacEdelta1-0   | 42C | 32.04 | 81.62 | 1.98 |                              |
| qacH-01        | 42C | 34.76 | 86.8  | 1.87 | MultipleMeltPeaks            |
| qacH-02        | 42C | 37.41 | 84.05 | 1.6  |                              |
| qnrA           | 42C | 29.56 | 83.14 | 2    |                              |



|              |     |       |       |      |                                          |
|--------------|-----|-------|-------|------|------------------------------------------|
| rarD-02      | 42C |       |       |      | NoAmplification                          |
| sat4         | 42C |       |       |      | LowEfficiency, CtIsSmall, S <sub>e</sub> |
| sdeB         | 42C |       |       |      | LowEfficiency, CtIsSmall, S <sub>e</sub> |
| spcN-01      | 42C |       |       |      | CurveFitFailed                           |
| speA         | 42C |       |       |      | NoAmplification                          |
| str          | 42C | 28.92 | 72.74 | 2.03 |                                          |
| strA         | 42C |       |       |      | LowEfficiency, CtIsSmall, S <sub>e</sub> |
| strB         | 42C | 28.33 | 83.31 | 1.94 |                                          |
| sul1         | 42C | 35.15 | 88.88 | 1.72 |                                          |
| sul2         | 42C | 39.8  | 87.08 | 1.75 | MultipleMeltPeaks                        |
| sulA/foIP-01 | 42C | 18.36 | 81.68 | 2.01 |                                          |
| sulA/foIP-03 | 42C | 19.35 | 83.3  | 1.97 |                                          |
| tet(32)      | 42C | 27.5  | 81.3  | 1.98 |                                          |
| tet(34)      | 42C | 33.52 | 75.39 | 1.97 |                                          |
| tet(35)      | 42C |       |       |      | NoAmplification                          |
| tet(36)-A    | 42C |       |       |      | CurveFitFailed                           |
| tet(36)-B    | 42C |       |       |      | LowEfficiency, CtIsSmall, S <sub>e</sub> |
| tet(37)      | 42C | 23.05 | 76.37 | 1.99 | MultipleMeltPeaks                        |
| tetA-01      | 42C | 32.93 | 85.2  | 1.9  |                                          |
| tetA-02      | 42C |       |       |      | CurveFitFailed                           |
| tetB-01      | 42C | 37.77 | 76.78 | 1.89 | MultipleMeltPeaks                        |
| tetB-02      | 42C |       |       |      | CurveFitFailed                           |
| tetC-01      | 42C |       |       |      | NoAmplification                          |
| tetC-02      | 42C |       |       |      | CurveFitFailed                           |
| tetD-01      | 42C |       |       |      | CurveFitFailed                           |
| tetD-02      | 42C | 35.45 | 76.23 | 1.79 | MultipleMeltPeaks                        |
| tetE         | 42C | 33.69 | 86.29 | 1.91 |                                          |
| tetG-01      | 42C | 35.38 | 82.37 | 1.82 | MultipleMeltPeaks                        |
| tetG-02      | 42C | 33.88 | 89.63 | 1.9  | MultipleMeltPeaks                        |
| tetH         | 42C |       |       |      | LowEfficiency, CtIsSmall, C <sub>i</sub> |
| tetJ         | 42C |       |       |      | LowEfficiency, CtIsSmall, C <sub>i</sub> |
| tetK         | 42C |       |       |      | LowEfficiency, CtIsSmall, S <sub>e</sub> |
| tetL-01      | 42C |       |       |      | LowEfficiency, CtIsSmall, S <sub>e</sub> |
| tetL-02      | 42C | 32.37 | 85.43 | 1.82 |                                          |
| tetM-01      | 42C | 17.94 | 76.47 | 2.01 |                                          |
| tetM-02      | 42C | 17.84 | 77.72 | 2.02 |                                          |
| tetO-01      | 42C | 26.51 | 76.99 | 2.04 |                                          |
| tetPA        | 42C |       |       |      | LowEfficiency, CtIsSmall, S <sub>e</sub> |
| tetPB-01     | 42C | 32.06 | 78.43 | 1.98 |                                          |
| tetPB-02     | 42C | 28.54 | 84.82 | 2.07 |                                          |
| tetPB-03     | 42C |       |       |      | LowEfficiency, CtIsSmall, S <sub>e</sub> |
| tetPB-05     | 42C |       |       |      | LowEfficiency, CtIsSmall, C <sub>i</sub> |
| tetQ         | 42C | 20.87 | 76.75 | 2.03 |                                          |
| tetR-02      | 42C | 29.45 | 82.31 | 1.92 |                                          |
| tetR-03      | 42C |       |       |      | CurveFitFailed                           |
| tetS         | 42C | 29.3  | 73.61 | 2.12 |                                          |

|             |     |       |       |      |                                     |
|-------------|-----|-------|-------|------|-------------------------------------|
| tetT        | 42C |       |       |      | NoAmplification                     |
| tetU-01     | 42C |       |       |      | LowEfficiency, CtIsSmall, CtIsSmall |
| tetV        | 42C |       |       |      | LowEfficiency, CtIsSmall, CtIsSmall |
| tetW-01     | 42C | 23.61 | 82.02 | 1.99 |                                     |
| tetX        | 42C |       |       |      | CurveFitFailed                      |
| tnpA-01     | 42C |       |       |      | LowEfficiency, CtIsSmall, CtIsSmall |
| tnpA-02     | 42C | 29.47 | 84.89 | 1.79 |                                     |
| tnpA-03     | 42C | 25.62 | 78.21 | 2.13 |                                     |
| tnpA-04     | 42C | 29.33 | 82.41 | 1.92 |                                     |
| tnpA-05     | 42C |       |       |      | CurveFitFailed                      |
| tnpA-07     | 42C |       |       |      | LowEfficiency, CtIsSmall, CtIsSmall |
| tolC-01     | 42C |       |       |      | CurveFitFailed                      |
| tolC-02     | 42C | 31.89 | 85.71 | 1.92 |                                     |
| tolC-03     | 42C | 31.23 | 85.92 | 1.94 |                                     |
| Tp614       | 42C |       |       |      | LowEfficiency, CtIsSmall, CtIsSmall |
| ttgA        | 42C | 35.47 | 87.14 | 1.76 | MultipleMeltPeaks                   |
| ttgB        | 42C |       |       |      | BadR2, LowEfficiency, CtIsSmall     |
| vanA        | 42C |       |       |      | NoAmplification                     |
| vanB-01     | 42C | 33.95 | 84.41 | 1.82 |                                     |
| vanC-01     | 42C |       |       |      | CurveFitFailed                      |
| vanC-02     | 42C |       |       |      | CurveFitFailed                      |
| vanC-03     | 42C | 27.9  | 91.85 | 1.97 |                                     |
| vanC1       | 42C |       |       |      | LowEfficiency, CtIsSmall, CtIsSmall |
| vanC2/vanC3 | 42C | 32.76 | 85.07 | 2.04 |                                     |
| vanG        | 42C |       |       |      | LowEfficiency, CtIsSmall, CtIsSmall |
| vanHB       | 42C | 38.82 | 89.42 | 1.69 | MultipleMeltPeaks                   |
| vanHD       | 42C |       |       |      | CurveFitFailed                      |
| vanRA-01    | 42C |       |       |      | LowEfficiency, CtIsSmall, CtIsSmall |
| vanRA-02    | 42C |       |       |      | LowEfficiency, CtIsSmall, CtIsSmall |
| vanRB       | 42C |       |       |      | CurveFitFailed                      |
| vanRC       | 42C |       |       |      | LowEfficiency, CtIsSmall, CtIsSmall |
| vanRC4      | 42C |       |       |      | CurveFitFailed                      |
| vanRD       | 42C | 38.19 | 73.22 | 2.22 |                                     |
| vanSA       | 42C |       |       |      | LowEfficiency, CtIsSmall, CtIsSmall |
| vanSB       | 42C |       |       |      | CurveFitFailed                      |
| vanSC-01    | 42C | 33.49 | 77.54 | 2.08 |                                     |
| vanSC-02    | 42C |       |       |      | NoAmplification                     |
| vanTC-01    | 42C |       |       |      | CurveFitFailed                      |
| vanTC-02    | 42C | 34.35 | 82.47 | 1.89 | MultipleMeltPeaks                   |
| vanTE       | 42C |       |       |      | LowEfficiency, CtIsSmall, CtIsSmall |
| vanTG       | 42C |       |       |      | CurveFitFailed                      |
| vanWB       | 42C |       |       |      | NoAmplification                     |
| vanWG       | 42C |       |       |      | LowEfficiency, CtIsSmall, CtIsSmall |
| vanXA       | 42C |       |       |      | CurveFitFailed                      |
| vanXB       | 42C |       |       |      | NoAmplification                     |
| vanXD       | 42C | 33.66 | 74.77 | 1.99 |                                     |

|              |     |       |       |      |                              |
|--------------|-----|-------|-------|------|------------------------------|
| vanYB        | 42C |       |       |      | LowEfficiency, CtIsSmall, S: |
| vanYD-01     | 42C | 38.13 | 80.57 | 1.72 | MultipleMeltPeaks            |
| vanYD-02     | 42C | 34.52 | 77.05 | 1.91 |                              |
| vatB-01      | 42C |       |       |      | CurveFitFailed               |
| vatB-02      | 42C |       |       |      | LowEfficiency, CtIsSmall, S: |
| vatC-01      | 42C |       |       |      | LowEfficiency, CtIsSmall, S: |
| vatC-02      | 42C |       |       |      | CurveFitFailed               |
| vatE-01      | 42C | 30.96 | 76.18 | 2.11 |                              |
| vatE-02      | 42C |       |       |      | NoAmplification              |
| vgaA-01      | 42C | 33.62 | 83.58 | 1.89 |                              |
| vgaA-02      | 42C |       |       |      | CurveFitFailed               |
| vgb-01       | 42C | 34.91 | 88.89 | 1.81 |                              |
| vgbB-01      | 42C |       |       |      | LowEfficiency, CtIsSmall, Ci |
| vgbB-02      | 42C |       |       |      | LowEfficiency, CtIsSmall, S: |
| yceE/mdtG-0  | 42C |       |       |      | LowEfficiency, CtIsSmall, S: |
| yceE/mdtG-0  | 42C |       |       |      | LowEfficiency, CtIsSmall, Ci |
| yceL/mdtH-0  | 42C | 34.65 | 82.92 | 1.86 | MultipleMeltPeaks            |
| yceL/mdtH-0  | 42C |       |       |      | LowEfficiency, CtIsSmall, Ci |
| yceL/mdtH-0  | 42C | 34.49 | 91.69 | 1.79 | MultipleMeltPeaks            |
| yidY/mdtL-01 | 42C | 32.38 | 84.63 | 1.97 | MultipleMeltPeaks            |
| yidY/mdtL-02 | 42C | 34.5  | 92.23 | 1.79 |                              |































| Assay          | Sample | Ct | Tm    | Efficiency | flag                         |
|----------------|--------|----|-------|------------|------------------------------|
| 16S rRNA       | 43A    |    | 18.48 | 82.24      | 1.98                         |
| aac            | 43A    |    | 30.04 | 86.11      | 1.95 MultipleMeltPeaks       |
| aac(6')-Ib(akz | 43A    |    |       |            | LowEfficiency, CtIsSmall, S: |
| aac(6')-Ib(akz | 43A    |    | 30.83 | 86.08      | 1.96                         |
| aac(6')-Ib(akz | 43A    |    | 35.29 | 76.13      | 1.83 MultipleMeltPeaks       |
| aac(6')-II     | 43A    |    |       |            | NoAmplification              |
| aac(6')I1      | 43A    |    | 40.86 | 62.6       | 1.69 MultipleMeltPeaks       |
| aacA/aphD      | 43A    |    |       |            | CurveFitFailed               |
| aacC           | 43A    |    | 30.98 | 75.36      | 1.96 MultipleMeltPeaks       |
| aacC1          | 43A    |    | 38.17 | 89.67      | 1.77 MultipleMeltPeaks       |
| aacC2          | 43A    |    |       |            | NoAmplification              |
| aacC4          | 43A    |    | 31.99 | 87.61      | 1.91 MultipleMeltPeaks       |
| aadA-01        | 43A    |    |       |            | NoAmplification              |
| aadA-02        | 43A    |    | 35.07 | 80.44      | 1.89                         |
| aadA-1-01      | 43A    |    | 33.2  | 81.46      | 1.86                         |
| aadA-1-02      | 43A    |    |       |            | NoAmplification              |
| aadA1          | 43A    |    | 32.12 | 85.32      | 1.97                         |
| aadA2-01       | 43A    |    |       |            | BadR2, LowEfficiency, CtIsS  |
| aadA2-02       | 43A    |    | 31.2  | 75.5       | 2.08                         |
| aadA2-03       | 43A    |    |       |            | NoAmplification              |
| aadA5-01       | 43A    |    | 37.52 | 83.86      | 1.7                          |
| aadA5-02       | 43A    |    | 31.26 | 86.97      | 1.97                         |
| aadA9-01       | 43A    |    | 37.37 | 87.56      | 1.85 MultipleMeltPeaks       |
| aadA9-02       | 43A    |    |       |            | NoAmplification              |
| aadD           | 43A    |    |       |            | NoAmplification              |
| aadE           | 43A    |    |       |            | NoAmplification              |
| acrA-01        | 43A    |    | 26.16 | 88.51      | 1.96 MultipleMeltPeaks       |
| acrA-02        | 43A    |    | 33.76 | 88.44      | 1.83                         |
| acrA-03        | 43A    |    | 38.81 | 77.27      | 1.73                         |
| acrA-04        | 43A    |    | 30.32 | 80.4       | 2                            |
| acrA-05        | 43A    |    | 30.76 | 79.96      | 1.96 MultipleMeltPeaks       |
| acrB-01        | 43A    |    | 36.52 | 75.48      | 1.85                         |
| acrF           | 43A    |    | 30.01 | 84.65      | 2.03 MultipleMeltPeaks       |
| acrR-01        | 43A    |    | 36.24 | 81.19      | 1.81 MultipleMeltPeaks       |
| acrR-02        | 43A    |    | 34.5  | 86.15      | 1.82                         |
| Actin          | 43A    |    | 22.49 | 86.89      | 1.94                         |
| adeA           | 43A    |    | 32.77 | 83.57      | 1.87                         |
| ampC-01        | 43A    |    | 32.98 | 85.26      | 1.95                         |
| ampC-02        | 43A    |    | 37.16 | 87.03      | 1.9                          |
| ampC-04        | 43A    |    | 32.51 | 78.55      | 1.9                          |
| ampC-05        | 43A    |    |       |            | NoAmplification              |
| ampC-06        | 43A    |    |       |            | BadR2, LowEfficiency, CtIsS  |
| ampC-07        | 43A    |    | 32.86 | 82.5       | 1.86                         |
| ampC-09        | 43A    |    |       |            | CurveFitFailed               |
| ampC/blaDH     | 43A    |    | 28.82 | 84.32      | 1.97 MultipleMeltPeaks       |

|                          |     |       |       |      |                                          |
|--------------------------|-----|-------|-------|------|------------------------------------------|
| aph                      | 43A |       |       |      | LowEfficiency, CtIsSmall, Ci             |
| aph(2')-Id-01            | 43A |       |       |      | NoAmplification                          |
| aph(2')-Id-02            | 43A |       |       |      | NoAmplification                          |
| aph6ia                   | 43A |       |       |      | NoAmplification                          |
| aphA1(aka k <sub>z</sub> | 43A |       |       |      | LowEfficiency, CtIsSmall, Ci             |
| bacA-01                  | 43A |       |       |      | CurveFitFailed                           |
| bacA-02                  | 43A | 33.95 | 88    | 1.78 |                                          |
| BETA-globin              | 43A | 23.45 | 83.99 | 1.97 |                                          |
| bla-ACC-1                | 43A | 33.73 | 86.27 | 1.85 | MultipleMeltPeaks                        |
| bla-L1                   | 43A | 29.79 | 85.82 | 1.96 |                                          |
| bla1                     | 43A |       |       |      | CurveFitFailed                           |
| blaCMY                   | 43A |       |       |      | CurveFitFailed                           |
| blaCMY2-01               | 43A | 32.17 | 78.34 | 2.02 |                                          |
| blaCMY2-02               | 43A | 27.87 | 85.21 | 2    | MultipleMeltPeaks                        |
| blaCTX-M-01              | 43A |       |       |      | NoAmplification                          |
| blaCTX-M-02              | 43A | 33.23 | 83.68 | 1.88 | MultipleMeltPeaks                        |
| blaCTX-M-03              | 43A |       |       |      | LowEfficiency, CtIsSmall, Ci             |
| blaCTX-M-04              | 43A | 31.71 | 87.94 | 1.96 |                                          |
| blaCTX-M-05              | 43A | 34.68 | 76.09 | 1.74 |                                          |
| blaCTX-M-06              | 43A |       |       |      | NoAmplification                          |
| blaGES                   | 43A |       |       |      | NoAmplification                          |
| blaIMP-01                | 43A |       |       |      | NoAmplification                          |
| blaIMP-02                | 43A |       |       |      | LowEfficiency, CtIsSmall, Ci             |
| blaMOX/blaC              | 43A |       |       |      | NoAmplification                          |
| blaOCH                   | 43A |       |       |      | NoAmplification                          |
| blaOKP                   | 43A |       |       |      | NoAmplification                          |
| blaOXA1/blaC             | 43A |       |       |      | NoAmplification                          |
| blaOXA10-01              | 43A |       |       |      | LowEfficiency, CtIsSmall, Ci             |
| blaOXA10-02              | 43A |       |       |      | CurveFitFailed                           |
| blaOXY                   | 43A | 34.72 | 89.94 | 1.72 |                                          |
| blaPAO                   | 43A |       |       |      | NoAmplification                          |
| blaPER                   | 43A |       |       |      | LowEfficiency, CtIsSmall, S <sub>c</sub> |
| blaPSE                   | 43A |       |       |      | NoAmplification                          |
| blaROB                   | 43A | 33.33 | 80.05 | 1.91 | MultipleMeltPeaks                        |
| blaSFO                   | 43A | 29.34 | 86.89 | 1.96 | MultipleMeltPeaks                        |
| blaSHV-01                | 43A | 36.15 | 87    | 1.65 |                                          |
| blaSHV-02                | 43A | 39.81 | 82.55 | 1.87 | MultipleMeltPeaks                        |
| blaTEM                   | 43A |       |       |      | NoAmplification                          |
| blaTLA                   | 43A |       |       |      | CurveFitFailed                           |
| blaVEB                   | 43A |       |       |      | NoAmplification                          |
| blaVIM                   | 43A |       |       |      | NoAmplification                          |
| blaZ                     | 43A |       |       |      | CurveFitFailed                           |
| carB                     | 43A | 37.27 | 87.41 | 1.8  | MultipleMeltPeaks                        |
| catA1                    | 43A |       |       |      | NoAmplification                          |
| catB3                    | 43A | 33.13 | 87.57 | 1.94 | MultipleMeltPeaks                        |
| catB8                    | 43A | 27.8  | 83.73 | 1.99 | MultipleMeltPeaks                        |

|            |     |       |       |      |                              |
|------------|-----|-------|-------|------|------------------------------|
| ceoA       | 43A | 26.79 | 82.36 | 1.95 | MultipleMeltPeaks            |
| cepA       | 43A |       |       |      | NoAmplification              |
| cfiA       | 43A | 31.62 | 86.94 | 1.94 |                              |
| cfr        | 43A |       |       |      | LowEfficiency, CtIsSmall, S: |
| cfxA       | 43A | 25.8  | 77.53 | 2.07 |                              |
| cmeA       | 43A | 36.85 | 84.72 | 1.81 |                              |
| cmlA1-01   | 43A | 43.94 | 63.23 | 1.74 | MultipleMeltPeaks            |
| cmlA1-02   | 43A |       |       |      | CurveFitFailed               |
| cmr        | 43A | 36.93 | 78.64 | 1.78 |                              |
| cmx(A)     | 43A | 27.48 | 84.93 | 1.99 |                              |
| cphA-01    | 43A | 30.97 | 85.34 | 1.99 |                              |
| cphA-02    | 43A | 33.25 | 82.31 | 1.9  | MultipleMeltPeaks            |
| dfrA1      | 43A | 40.39 | 77.27 | 1.77 | MultipleMeltPeaks            |
| dfrA12     | 43A |       |       |      | CurveFitFailed               |
| emrD       | 43A | 35.69 | 84.14 | 1.79 |                              |
| ereA       | 43A | 35.96 | 82.64 | 1.85 |                              |
| ereB       | 43A | 38.45 | 85.81 | 1.74 |                              |
| erm(34)    | 43A | 37.72 | 61.95 | 2.02 | MultipleMeltPeaks            |
| erm(35)    | 43A |       |       |      | NoAmplification              |
| erm(36)    | 43A | 38.74 | 87.44 | 1.77 | MultipleMeltPeaks            |
| ermA       | 43A |       |       |      | LowEfficiency, CtIsSmall, S: |
| ermA/ermTR | 43A |       |       |      | NoAmplification              |
| ermB       | 43A | 22.02 | 75.08 | 2.08 |                              |
| ermC       | 43A | 34    | 85.42 | 1.94 |                              |
| ermF       | 43A |       |       |      | LowEfficiency, CtIsSmall, S: |
| ermJ/ermD  | 43A |       |       |      | NoAmplification              |
| ermK-01    | 43A | 32.55 | 75.06 | 2.03 |                              |
| ermK-02    | 43A |       |       |      | CurveFitFailed               |
| ermT-01    | 43A |       |       |      | CurveFitFailed               |
| ermT-02    | 43A | 35.65 | 71.2  | 1.93 |                              |
| ermX       | 43A | 35.35 | 88.27 | 1.73 |                              |
| ermY       | 43A |       |       |      | NoAmplification              |
| fabK       | 43A | 24.1  | 78.83 | 2.1  |                              |
| floR       | 43A |       |       |      | NoAmplification              |
| folA       | 43A |       |       |      | NoAmplification              |
| fosB       | 43A |       |       |      | LowEfficiency, CtIsSmall, S: |
| fosX       | 43A |       |       |      | CurveFitFailed               |
| fox5       | 43A | 27.77 | 87.24 | 1.97 | MultipleMeltPeaks            |
| imiR       | 43A |       |       |      | NoAmplification              |
| ImrA-01    | 43A |       |       |      | NoAmplification              |
| intl       | 43A | 28.95 | 88.7  | 1.97 | MultipleMeltPeaks            |
| intl1      | 43A | 20.29 | 87.16 | 2    |                              |
| IS613      | 43A | 26.06 | 80.03 | 2.04 |                              |
| lnuA-01    | 43A |       |       |      | LowEfficiency, CtIsSmall, S: |
| lnuB-01    | 43A |       |       |      | NoAmplification              |
| lnuB-02    | 43A |       |       |      | NoAmplification              |

|                |     |       |       |      |                              |
|----------------|-----|-------|-------|------|------------------------------|
| lnuC           | 43A | 35.7  | 84.21 | 1.66 |                              |
| marR-01        | 43A | 32.89 | 88.27 | 1.89 |                              |
| matA/mel       | 43A | 20.53 | 77.75 | 2.04 |                              |
| mdet1          | 43A |       |       |      | NoAmplification              |
| mdtA           | 43A | 37.37 | 82.08 | 1.65 |                              |
| mdtE/yhiU      | 43A | 34.65 | 87.29 | 1.83 |                              |
| mecA           | 43A |       |       |      | LowEfficiency, CtIsSmall, Ci |
| mefA           | 43A | 19.69 | 80.5  | 1.96 |                              |
| mepA           | 43A | 29.9  | 87.63 | 2.02 |                              |
| mexA           | 43A |       |       |      | CurveFitFailed               |
| mexD           | 43A |       |       |      | NoAmplification              |
| mexE           | 43A | 38.53 | 83.5  | 1.76 | MultipleMeltPeaks            |
| mexF           | 43A | 27.74 | 87.6  | 2.04 |                              |
| mphA-01        | 43A | 29.58 | 87.1  | 2.01 |                              |
| mphA-02        | 43A | 28.95 | 86.71 | 2.11 |                              |
| mphB           | 43A | 37.66 | 80.32 | 1.79 |                              |
| mphC           | 43A | 38.02 | 76.93 | 1.84 | MultipleMeltPeaks            |
| msrA-01        | 43A | 28.78 | 76.61 | 2.04 |                              |
| msrC-01        | 43A |       |       |      | NoAmplification              |
| mtrC-01        | 43A | 37.43 | 84.4  | 1.73 |                              |
| mtrC-02        | 43A | 32.13 | 84.29 | 2.02 |                              |
| mtrD-02        | 43A | 26.94 | 81.51 | 2.03 |                              |
| mtrD-03        | 43A | 29.98 | 82.08 | 1.92 |                              |
| NDM1           | 43A |       |       |      | CurveFitFailed               |
| nimE           | 43A |       |       |      | CurveFitFailed               |
| nisB           | 43A | 32.19 | 76.46 | 2.02 |                              |
| oleC           | 43A | 35.85 | 87.17 | 1.83 |                              |
| oprD           | 43A | 27.09 | 91.68 | 1.93 |                              |
| oprJ           | 43A | 29.66 | 89.44 | 1.95 |                              |
| pbp            | 43A |       |       |      | LowEfficiency, CtIsSmall, Ci |
| pbp2x          | 43A |       |       |      | NoAmplification              |
| Pbp5           | 43A |       |       |      | LowEfficiency, CtIsSmall, Ci |
| penA           | 43A | 39.49 | 89.24 | 1.6  |                              |
| pikR1          | 43A | 41.11 | 81.01 | 1.73 | MultipleMeltPeaks            |
| pikR2          | 43A | 29.78 | 84.68 | 2.08 |                              |
| pmrA           | 43A | 23.11 | 79.25 | 2.1  |                              |
| pncA           | 43A | 36.46 | 79.84 | 1.89 | MultipleMeltPeaks            |
| putative multi | 43A | 32.33 | 84.08 | 1.97 |                              |
| qac            | 43A | 38.57 | 79.03 | 1.87 | MultipleMeltPeaks            |
| qacA           | 43A |       |       |      | LowEfficiency, CtIsSmall, Ci |
| qacA/qacB      | 43A |       |       |      | CurveFitFailed               |
| qacEdelta1-0   | 43A |       |       |      | LowEfficiency, CtIsSmall, Ci |
| qacEdelta1-0   | 43A | 30.96 | 85.6  | 1.95 |                              |
| qacH-01        | 43A | 31.2  | 86.3  | 1.98 |                              |
| qacH-02        | 43A | 35    | 84.02 | 1.63 |                              |
| qnrA           | 43A |       |       |      | CurveFitFailed               |

|              |     |       |       |      |                                          |
|--------------|-----|-------|-------|------|------------------------------------------|
| rarD-02      | 43A |       |       |      | NoAmplification                          |
| sat4         | 43A |       |       |      | LowEfficiency, CtIsSmall, S <sub>c</sub> |
| sdeB         | 43A |       |       |      | BadR2, LowEfficiency, CtIsS              |
| spcN-01      | 43A | 38.77 | 84.43 | 1.84 |                                          |
| speA         | 43A |       |       |      | NoAmplification                          |
| str          | 43A |       |       |      | NoAmplification                          |
| strA         | 43A |       |       |      | LowEfficiency, CtIsSmall, C <sub>i</sub> |
| strB         | 43A |       |       |      | NoAmplification                          |
| sul1         | 43A | 32.14 | 89.68 | 1.91 |                                          |
| sul2         | 43A |       |       |      | LowEfficiency, CtIsSmall, C <sub>i</sub> |
| sulA/foIP-01 | 43A | 22.27 | 81.25 | 1.98 |                                          |
| sulA/foIP-03 | 43A | 22.56 | 83.87 | 1.98 |                                          |
| tet(32)      | 43A |       |       |      | NoAmplification                          |
| tet(34)      | 43A | 30.41 | 75.93 | 2.02 |                                          |
| tet(35)      | 43A |       |       |      | NoAmplification                          |
| tet(36)-A    | 43A |       |       |      | NoAmplification                          |
| tet(36)-B    | 43A |       |       |      | NoAmplification                          |
| tet(37)      | 43A | 28.71 | 82.66 | 1.99 | MultipleMeltPeaks                        |
| tetA-01      | 43A | 28.72 | 85.14 | 1.92 |                                          |
| tetA-02      | 43A |       |       |      | LowEfficiency, CtIsSmall, C <sub>i</sub> |
| tetB-01      | 43A | 26.46 | 79.45 | 1.99 |                                          |
| tetB-02      | 43A | 25.66 | 79.68 | 2    |                                          |
| tetC-01      | 43A | 26.81 | 75.38 | 2.05 |                                          |
| tetC-02      | 43A | 25.74 | 76.15 | 2.04 |                                          |
| tetD-01      | 43A |       |       |      | CurveFitFailed                           |
| tetD-02      | 43A | 32.3  | 84.99 | 2    |                                          |
| tetE         | 43A |       |       |      | NoAmplification                          |
| tetG-01      | 43A | 32.58 | 82.86 | 1.78 | MultipleMeltPeaks                        |
| tetG-02      | 43A |       |       |      | CurveFitFailed                           |
| tetH         | 43A |       |       |      | NoAmplification                          |
| tetJ         | 43A |       |       |      | NoAmplification                          |
| tetK         | 43A |       |       |      | LowEfficiency, CtIsSmall, S <sub>c</sub> |
| tetL-01      | 43A |       |       |      | CurveFitFailed                           |
| tetL-02      | 43A | 30.97 | 85.17 | 1.84 | MultipleMeltPeaks                        |
| tetM-01      | 43A | 21.26 | 76.37 | 2.01 |                                          |
| tetM-02      | 43A | 21.24 | 77.72 | 2.02 |                                          |
| tetO-01      | 43A | 22.15 | 77.05 | 2.05 |                                          |
| tetPA        | 43A |       |       |      | CurveFitFailed                           |
| tetPB-01     | 43A |       |       |      | NoAmplification                          |
| tetPB-02     | 43A | 28.38 | 84.83 | 2.02 |                                          |
| tetPB-03     | 43A |       |       |      | LowEfficiency, CtIsSmall, C <sub>i</sub> |
| tetPB-05     | 43A |       |       |      | CurveFitFailed                           |
| tetQ         | 43A | 24.82 | 77.46 | 2.01 |                                          |
| tetR-02      | 43A | 33.28 | 90.81 | 1.88 | MultipleMeltPeaks                        |
| tetR-03      | 43A | 25.99 | 76.26 | 2.01 |                                          |
| tetS         | 43A | 40.15 | 62.6  | 1.75 | MultipleMeltPeaks                        |

|             |     |       |       |      |                              |
|-------------|-----|-------|-------|------|------------------------------|
| tetT        | 43A |       |       |      | NoAmplification              |
| tetU-01     | 43A |       |       |      | NoAmplification              |
| tetV        | 43A |       |       |      | NoAmplification              |
| tetW-01     | 43A | 29.35 | 81.61 | 1.97 |                              |
| tetX        | 43A |       |       |      | BadR2, CtIsSmall, Saturatio  |
| tnpA-01     | 43A | 35.51 | 78.12 | 1.88 |                              |
| tnpA-02     | 43A | 36.61 | 83.61 | 1.67 | MultipleMeltPeaks            |
| tnpA-03     | 43A | 35.57 | 77.6  | 2.04 |                              |
| tnpA-04     | 43A |       |       |      | NoAmplification              |
| tnpA-05     | 43A | 34.95 | 82.48 | 1.84 | MultipleMeltPeaks            |
| tnpA-07     | 43A |       |       |      | NoAmplification              |
| tolC-01     | 43A | 37.21 | 80.41 | 2.31 | MultipleMeltPeaks            |
| tolC-02     | 43A | 29.22 | 86.84 | 2    | MultipleMeltPeaks            |
| tolC-03     | 43A | 32.73 | 85.28 | 1.95 | MultipleMeltPeaks            |
| Tp614       | 43A | 36.85 | 82.33 | 1.83 | MultipleMeltPeaks            |
| ttgA        | 43A | 37.8  | 91.55 | 1.85 | MultipleMeltPeaks            |
| ttgB        | 43A | 33.69 | 80.65 | 1.95 | MultipleMeltPeaks            |
| vanA        | 43A |       |       |      | NoAmplification              |
| vanB-01     | 43A | 35.13 | 82.86 | 1.86 |                              |
| vanC-01     | 43A |       |       |      | LowEfficiency, CtIsSmall, S: |
| vanC-02     | 43A |       |       |      | LowEfficiency, CtIsSmall, S: |
| vanC-03     | 43A | 26.55 | 86.87 | 1.95 | MultipleMeltPeaks            |
| vanC1       | 43A |       |       |      | CurveFitFailed               |
| vanC2/vanC3 | 43A | 32.8  | 84.79 | 1.93 |                              |
| vanG        | 43A |       |       |      | BadR2, CtIsSmall, Saturatio  |
| vanHB       | 43A | 34.99 | 82.05 | 1.88 |                              |
| vanHD       | 43A | 35.85 | 82.7  | 1.83 |                              |
| vanRA-01    | 43A |       |       |      | NoAmplification              |
| vanRA-02    | 43A |       |       |      | NoAmplification              |
| vanRB       | 43A | 31.27 | 87.43 | 2.04 |                              |
| vanRC       | 43A |       |       |      | CurveFitFailed               |
| vanRC4      | 43A |       |       |      | CurveFitFailed               |
| vanRD       | 43A |       |       |      | NoAmplification              |
| vanSA       | 43A |       |       |      | LowEfficiency, CtIsSmall, S: |
| vanSB       | 43A | 29.87 | 74.66 | 2.07 |                              |
| vanSC-01    | 43A | 32.78 | 83.95 | 1.98 |                              |
| vanSC-02    | 43A |       |       |      | NoAmplification              |
| vanTC-01    | 43A |       |       |      | LowEfficiency, CtIsSmall, Ci |
| vanTC-02    | 43A | 34.76 | 86.36 | 1.74 |                              |
| vanTE       | 43A |       |       |      | CurveFitFailed               |
| vanTG       | 43A |       |       |      | NoAmplification              |
| vanWB       | 43A |       |       |      | NoAmplification              |
| vanWG       | 43A |       |       |      | NoAmplification              |
| vanXA       | 43A | 32.71 | 73.85 | 1.84 |                              |
| vanXB       | 43A |       |       |      | NoAmplification              |
| vanXD       | 43A | 31.76 | 74.95 | 2.08 |                              |

|              |     |       |       |      |                              |
|--------------|-----|-------|-------|------|------------------------------|
| vanYB        | 43A |       |       |      | NoAmplification              |
| vanYD-01     | 43A | 33.18 | 81.41 | 1.81 |                              |
| vanYD-02     | 43A | 37.64 | 74.75 | 1.88 |                              |
| vatB-01      | 43A | 38.46 | 74.85 | 1.85 |                              |
| vatB-02      | 43A | 38.14 | 79.18 | 1.71 |                              |
| vatC-01      | 43A |       |       |      | LowEfficiency, CtIsSmall, Ci |
| vatC-02      | 43A | 36.77 | 83.23 | 1.81 |                              |
| vatE-01      | 43A | 30.29 | 77.27 | 2.11 |                              |
| vatE-02      | 43A | 40.48 | 75.3  | 1.98 |                              |
| vgaA-01      | 43A |       |       |      | LowEfficiency, CtIsSmall, Ci |
| vgaA-02      | 43A | 38.18 | 80.81 | 1.73 | MultipleMeltPeaks            |
| vgb-01       | 43A | 34.97 | 79.49 | 1.9  |                              |
| vgbB-01      | 43A |       |       |      | CurveFitFailed               |
| vgbB-02      | 43A |       |       |      | NoAmplification              |
| yceE/mdtG-0  | 43A |       |       |      | CurveFitFailed               |
| yceE/mdtG-0  | 43A | 39.44 | 81.14 | 1.77 |                              |
| yceL/mdtH-0  | 43A | 31.09 | 82.73 | 1.95 |                              |
| yceL/mdtH-0  | 43A |       |       |      | NoAmplification              |
| yceL/mdtH-0  | 43A | 39.4  | 75.91 | 1.72 | MultipleMeltPeaks            |
| yidY/mdtL-01 | 43A | 31.61 | 82.67 | 1.95 |                              |
| yidY/mdtL-02 | 43A | 28.69 | 79.93 | 1.97 |                              |































| Assay          | Sample | Ct | Tm    | Efficiency | flag                         |
|----------------|--------|----|-------|------------|------------------------------|
| 16S rRNA       | 43B    |    | 12.87 | 82.3       | 1.96                         |
| aac            | 43B    |    | 33.88 | 81.64      | 1.63 MultipleMeltPeaks       |
| aac(6')-Ib(akz | 43B    |    |       |            | CurveFitFailed               |
| aac(6')-Ib(akz | 43B    |    | 34.13 | 90.36      | 1.88                         |
| aac(6')-Ib(akz | 43B    |    | 36.49 | 76.84      | 1.78                         |
| aac(6')-II     | 43B    |    | 35.55 | 91.02      | 1.8 MultipleMeltPeaks        |
| aac(6')I1      | 43B    |    | 35.81 | 85.84      | 1.75 MultipleMeltPeaks       |
| aacA/aphD      | 43B    |    |       |            | CurveFitFailed               |
| aacC           | 43B    |    | 29.64 | 88.43      | 1.86                         |
| aacC1          | 43B    |    |       |            | CurveFitFailed               |
| aacC2          | 43B    |    |       |            | CurveFitFailed               |
| aacC4          | 43B    |    | 30.99 | 91.42      | 1.9                          |
| aadA-01        | 43B    |    |       |            | LowEfficiency, CtIsSmall, S: |
| aadA-02        | 43B    |    | 37.07 | 80.62      | 1.89                         |
| aadA-1-01      | 43B    |    | 36.14 | 81.48      | 1.84                         |
| aadA-1-02      | 43B    |    |       |            | LowEfficiency, CtIsSmall, S: |
| aadA1          | 43B    |    | 36.58 | 84.89      | 1.81                         |
| aadA2-01       | 43B    |    |       |            | CurveFitFailed               |
| aadA2-02       | 43B    |    | 31.81 | 75.46      | 2.02                         |
| aadA2-03       | 43B    |    |       |            | CurveFitFailed               |
| aadA5-01       | 43B    |    |       |            | CurveFitFailed               |
| aadA5-02       | 43B    |    | 32.15 | 87.43      | 1.96                         |
| aadA9-01       | 43B    |    | 32.53 | 86.03      | 1.86                         |
| aadA9-02       | 43B    |    | 36.93 | 87.89      | 1.89                         |
| aadD           | 43B    |    |       |            | LowEfficiency, CtIsSmall, S: |
| aadE           | 43B    |    |       |            | LowEfficiency, CtIsSmall, S: |
| acrA-01        | 43B    |    | 24.91 | 82.88      | 1.94 MultipleMeltPeaks       |
| acrA-02        | 43B    |    | 31.24 | 87.51      | 1.85                         |
| acrA-03        | 43B    |    | 38.81 | 87.05      | 1.62 MultipleMeltPeaks       |
| acrA-04        | 43B    |    | 31.95 | 80.61      | 1.96                         |
| acrA-05        | 43B    |    | 31.11 | 92.27      | 2 MultipleMeltPeaks          |
| acrB-01        | 43B    |    | 30.15 | 82.19      | 1.98                         |
| acrF           | 43B    |    | 30.35 | 82.02      | 1.83                         |
| acrR-01        | 43B    |    | 34.32 | 82.9       | 1.89                         |
| acrR-02        | 43B    |    |       |            | LowEfficiency, CtIsSmall, S: |
| Actin          | 43B    |    | 21.57 | 87.08      | 1.92                         |
| adeA           | 43B    |    | 36.4  | 84.17      | 1.75 MultipleMeltPeaks       |
| ampC-01        | 43B    |    | 30.72 | 80.93      | 1.93                         |
| ampC-02        | 43B    |    |       |            | CurveFitFailed               |
| ampC-04        | 43B    |    | 34.95 | 78.07      | 1.96                         |
| ampC-05        | 43B    |    |       |            | CurveFitFailed               |
| ampC-06        | 43B    |    |       |            | LowEfficiency, CtIsSmall, S: |
| ampC-07        | 43B    |    |       |            | CurveFitFailed               |
| ampC-09        | 43B    |    |       |            | CurveFitFailed               |
| ampC/blaDH     | 43B    |    | 30.73 | 77.09      | 2.01                         |

|                            |     |       |       |      |                              |
|----------------------------|-----|-------|-------|------|------------------------------|
| aph                        | 43B |       |       |      | LowEfficiency, CtIsSmall, S: |
| aph(2')-Id-01              | 43B |       |       |      | CurveFitFailed               |
| aph(2')-Id-02              | 43B |       |       |      | LowEfficiency, CtIsSmall, S: |
| aph6ia                     | 43B | 22.57 | 78.55 | 1.97 | MultipleMeltPeaks            |
| aphA1(aka k <sub>z</sub> ) | 43B |       |       |      | LowEfficiency, CtIsSmall, S: |
| bacA-01                    | 43B |       |       |      | LowEfficiency, CtIsSmall, S: |
| bacA-02                    | 43B | 28.97 | 83.05 | 1.97 |                              |
| BETA-globin                | 43B | 21.73 | 84.06 | 1.98 | MultipleMeltPeaks            |
| bla-ACC-1                  | 43B | 27.93 | 80.66 | 1.92 |                              |
| bla-L1                     | 43B | 32.5  | 84.08 | 1.96 |                              |
| bla1                       | 43B |       |       |      | CurveFitFailed               |
| blaCMY                     | 43B | 30.1  | 80.63 | 1.94 |                              |
| blaCMY2-01                 | 43B |       |       |      | BadR2, LowEfficiency, CtIsS  |
| blaCMY2-02                 | 43B | 30.18 | 85.3  | 1.97 | MultipleMeltPeaks            |
| blaCTX-M-01                | 43B |       |       |      | LowEfficiency, CtIsSmall, S: |
| blaCTX-M-02                | 43B | 37.64 | 79.6  | 1.71 | MultipleMeltPeaks            |
| blaCTX-M-03                | 43B |       |       |      | LowEfficiency, CtIsSmall, S: |
| blaCTX-M-04                | 43B | 31.47 | 87.84 | 1.85 |                              |
| blaCTX-M-05                | 43B | 32.74 | 76.1  | 1.81 |                              |
| blaCTX-M-06                | 43B |       |       |      | CurveFitFailed               |
| blaGES                     | 43B |       |       |      | LowEfficiency, CtIsSmall, S: |
| blaIMP-01                  | 43B |       |       |      | LowEfficiency, CtIsSmall, S: |
| blaIMP-02                  | 43B |       |       |      | LowEfficiency, CtIsSmall, S: |
| blaMOX/blaC                | 43B |       |       |      | NoAmplification              |
| blaOCH                     | 43B | 31.39 | 82.6  | 1.91 | MultipleMeltPeaks            |
| blaOKP                     | 43B |       |       |      | NoAmplification              |
| blaOXA1/blaC               | 43B |       |       |      | LowEfficiency, CtIsSmall, S: |
| blaOXA10-01                | 43B |       |       |      | LowEfficiency, CtIsSmall, S: |
| blaOXA10-02                | 43B |       |       |      | LowEfficiency, CtIsSmall, S: |
| blaOXY                     | 43B |       |       |      | CurveFitFailed               |
| blaPAO                     | 43B |       |       |      | CurveFitFailed               |
| blaPER                     | 43B |       |       |      | CurveFitFailed               |
| blaPSE                     | 43B |       |       |      | CurveFitFailed               |
| blaROB                     | 43B | 30.83 | 87.54 | 1.98 |                              |
| blaSFO                     | 43B | 29.66 | 89.55 | 1.81 |                              |
| blaSHV-01                  | 43B | 36.27 | 73.31 | 2.12 |                              |
| blaSHV-02                  | 43B |       |       |      | LowEfficiency, CtIsSmall, S: |
| blaTEM                     | 43B | 27.65 | 79.55 | 1.94 |                              |
| blaTLA                     | 43B |       |       |      | CurveFitFailed               |
| blaVEB                     | 43B |       |       |      | LowEfficiency, CtIsSmall, S: |
| blaVIM                     | 43B |       |       |      | LowEfficiency, CtIsSmall, S: |
| blaZ                       | 43B |       |       |      | LowEfficiency, CtIsSmall, S: |
| carB                       | 43B | 33.73 | 80.02 | 1.89 |                              |
| catA1                      | 43B |       |       |      | NoAmplification              |
| catB3                      | 43B | 36.9  | 80.1  | 1.76 | MultipleMeltPeaks            |
| catB8                      | 43B | 32.39 | 80.07 | 1.92 |                              |

|            |     |       |       |      |                              |
|------------|-----|-------|-------|------|------------------------------|
| ceoA       | 43B | 27.59 | 85.18 | 1.95 | MultipleMeltPeaks            |
| cepA       | 43B |       |       |      | LowEfficiency, CtIsSmall, S: |
| cfiA       | 43B | 35.75 | 83.33 | 1.82 |                              |
| cfr        | 43B |       |       |      | CurveFitFailed               |
| cfxA       | 43B | 21.18 | 77.65 | 2.05 |                              |
| cmeA       | 43B | 33.26 | 89.21 | 1.86 |                              |
| cmlA1-01   | 43B | 34.84 | 87.77 | 1.83 | MultipleMeltPeaks            |
| cmlA1-02   | 43B | 36.05 | 89.6  | 1.79 | MultipleMeltPeaks            |
| cmr        | 43B |       |       |      | CurveFitFailed               |
| cmx(A)     | 43B | 26.88 | 87.06 | 1.97 | MultipleMeltPeaks            |
| cphA-01    | 43B | 38.01 | 81.22 | 1.87 | MultipleMeltPeaks            |
| cphA-02    | 43B |       |       |      | CurveFitFailed               |
| dfrA1      | 43B |       |       |      | NoAmplification              |
| dfrA12     | 43B | 32.4  | 77.7  | 1.96 |                              |
| emrD       | 43B | 32.7  | 82.87 | 1.91 |                              |
| ereA       | 43B |       |       |      | CurveFitFailed               |
| ereB       | 43B | 34.53 | 85.8  | 1.9  |                              |
| erm(34)    | 43B | 41.22 | 87.16 | 1.77 |                              |
| erm(35)    | 43B |       |       |      | CurveFitFailed               |
| erm(36)    | 43B | 32.28 | 86.3  | 1.96 |                              |
| ermA       | 43B |       |       |      | LowEfficiency, CtIsSmall, S: |
| ermA/ermTR | 43B |       |       |      | NoAmplification              |
| ermB       | 43B | 18.42 | 75.04 | 2.13 |                              |
| ermC       | 43B | 27.65 | 75.73 | 2.03 |                              |
| ermF       | 43B | 29.87 | 74.4  | 2    |                              |
| ermJ/ermD  | 43B |       |       |      | LowEfficiency, CtIsSmall, S: |
| ermK-01    | 43B |       |       |      | LowEfficiency, CtIsSmall, S: |
| ermK-02    | 43B |       |       |      | LowEfficiency, CtIsSmall, S: |
| ermT-01    | 43B |       |       |      | CurveFitFailed               |
| ermT-02    | 43B |       |       |      | LowEfficiency, CtIsSmall, S: |
| ermX       | 43B |       |       |      | CurveFitFailed               |
| ermY       | 43B |       |       |      | LowEfficiency, CtIsSmall, S: |
| fabK       | 43B | 22.32 | 78.69 | 2.26 |                              |
| floR       | 43B |       |       |      | NoAmplification              |
| folA       | 43B | 33.49 | 81.41 | 1.92 |                              |
| fosB       | 43B |       |       |      | LowEfficiency, CtIsSmall, S: |
| fosX       | 43B |       |       |      | LowEfficiency, CtIsSmall, S: |
| fox5       | 43B | 25.51 | 86.32 | 1.95 |                              |
| imiR       | 43B | 36.76 | 74.62 | 1.84 |                              |
| lmrA-01    | 43B | 38.28 | 82.72 | 1.89 |                              |
| intl       | 43B | 32.99 | 84.86 | 1.87 |                              |
| intl1      | 43B | 20.77 | 86.8  | 1.97 |                              |
| IS613      | 43B | 23.72 | 80.13 | 2.05 |                              |
| lnuA-01    | 43B |       |       |      | LowEfficiency, CtIsSmall, S: |
| lnuB-01    | 43B |       |       |      | CurveFitFailed               |
| lnuB-02    | 43B |       |       |      | LowEfficiency, CtIsSmall, S: |

|                |     |       |       |      |                                          |
|----------------|-----|-------|-------|------|------------------------------------------|
| lnuC           | 43B |       |       |      | CurveFitFailed                           |
| marR-01        | 43B | 34.37 | 90    | 1.87 |                                          |
| matA/mel       | 43B | 15.25 | 77.76 | 2.14 |                                          |
| mdet1          | 43B |       |       |      | CurveFitFailed                           |
| mdtA           | 43B | 36.4  | 81.88 | 1.66 |                                          |
| mdtE/yhiU      | 43B | 30.17 | 87.48 | 1.9  | MultipleMeltPeaks                        |
| mecA           | 43B | 28.41 | 74.8  | 2.02 |                                          |
| mefA           | 43B | 14.57 | 80.68 | 2.07 | MultipleMeltPeaks                        |
| mepA           | 43B | 30.18 | 87.91 | 1.87 | MultipleMeltPeaks                        |
| mexA           | 43B | 37    | 83.49 | 1.78 |                                          |
| mexD           | 43B |       |       |      | LowEfficiency, CtIsSmall, S <sub>c</sub> |
| mexE           | 43B | 34.95 | 89.23 | 1.85 |                                          |
| mexF           | 43B | 25.68 | 87.64 | 1.86 |                                          |
| mphA-01        | 43B | 30.4  | 88.69 | 1.86 |                                          |
| mphA-02        | 43B | 28.42 | 90.39 | 1.55 |                                          |
| mphB           | 43B |       |       |      | CurveFitFailed                           |
| mphC           | 43B |       |       |      | LowEfficiency, CtIsSmall, S <sub>c</sub> |
| msrA-01        | 43B | 31.64 | 73.46 | 2.09 |                                          |
| msrC-01        | 43B |       |       |      | NoAmplification                          |
| mtrC-01        | 43B | 33.56 | 83.26 | 1.94 |                                          |
| mtrC-02        | 43B | 35.97 | 84.45 | 1.89 |                                          |
| mtrD-02        | 43B | 28.69 | 81.21 | 1.97 |                                          |
| mtrD-03        | 43B | 29.38 | 82.16 | 1.91 |                                          |
| NDM1           | 43B |       |       |      | LowEfficiency, CtIsSmall, S <sub>c</sub> |
| nimE           | 43B |       |       |      | LowEfficiency, CtIsSmall, S <sub>c</sub> |
| nisB           | 43B |       |       |      | CurveFitFailed                           |
| oleC           | 43B | 28.9  | 89.04 | 1.87 |                                          |
| oprD           | 43B | 26.6  | 91.97 | 2    | MultipleMeltPeaks                        |
| oprJ           | 43B | 24.68 | 89.83 | 1.93 |                                          |
| pbp            | 43B |       |       |      | LowEfficiency, CtIsSmall, S <sub>c</sub> |
| pbp2x          | 43B | 25.99 | 75.08 | 1.78 |                                          |
| Pbp5           | 43B |       |       |      | LowEfficiency, CtIsSmall, S <sub>c</sub> |
| penA           | 43B |       |       |      | NoAmplification                          |
| pikR1          | 43B | 31.1  | 89.55 | 1.95 |                                          |
| pikR2          | 43B | 32.09 | 84.78 | 2.04 |                                          |
| pmrA           | 43B | 20.42 | 79.22 | 2.08 |                                          |
| pncA           | 43B | 30.84 | 90.38 | 1.97 |                                          |
| putative multi | 43B |       |       |      | LowEfficiency, CtIsSmall, S <sub>c</sub> |
| qac            | 43B |       |       |      | LowEfficiency, CtIsSmall, S <sub>c</sub> |
| qacA           | 43B |       |       |      | CurveFitFailed                           |
| qacA/qacB      | 43B |       |       |      | LowEfficiency, CtIsSmall, S <sub>c</sub> |
| qacEdelta1-0   | 43B |       |       |      | LowEfficiency, CtIsSmall, S <sub>c</sub> |
| qacEdelta1-0   | 43B | 31.24 | 85.64 | 1.9  |                                          |
| qacH-01        | 43B | 30.72 | 88.26 | 1.87 |                                          |
| qacH-02        | 43B | 38.47 | 83.96 | 1.57 |                                          |
| qnrA           | 43B | 36.58 | 80.09 | 1.87 |                                          |



|              |     |       |       |      |                              |
|--------------|-----|-------|-------|------|------------------------------|
| rarD-02      | 43B | 29.2  | 80.24 | 1.85 |                              |
| sat4         | 43B |       |       |      | CurveFitFailed               |
| sdeB         | 43B |       |       |      | LowEfficiency, CtIsSmall, S: |
| spcN-01      | 43B |       |       |      | LowEfficiency, CtIsSmall, S: |
| speA         | 43B |       |       |      | NoAmplification              |
| str          | 43B |       |       |      | CurveFitFailed               |
| strA         | 43B |       |       |      | CurveFitFailed               |
| strB         | 43B | 33.81 | 79.13 | 1.88 |                              |
| sul1         | 43B | 32.78 | 89.92 | 1.83 |                              |
| sul2         | 43B |       |       |      | CurveFitFailed               |
| sulA/foIP-01 | 43B | 19.1  | 81.34 | 1.98 |                              |
| sulA/foIP-03 | 43B | 19.7  | 83.96 | 1.95 |                              |
| tet(32)      | 43B |       |       |      | LowEfficiency, CtIsSmall, S: |
| tet(34)      | 43B | 31.39 | 75.75 | 1.98 |                              |
| tet(35)      | 43B |       |       |      | NoAmplification              |
| tet(36)-A    | 43B |       |       |      | LowEfficiency, CtIsSmall, S: |
| tet(36)-B    | 43B |       |       |      | LowEfficiency, CtIsSmall, S: |
| tet(37)      | 43B | 18.93 | 76.63 | 2.02 |                              |
| tetA-01      | 43B | 32.57 | 85.22 | 1.91 |                              |
| tetA-02      | 43B | 33.74 | 81.56 | 1.87 |                              |
| tetB-01      | 43B | 19.27 | 80.07 | 1.92 |                              |
| tetB-02      | 43B | 18.69 | 79.9  | 2.01 |                              |
| tetC-01      | 43B | 19.21 | 75.49 | 1.91 |                              |
| tetC-02      | 43B | 19.09 | 76.27 | 2.07 |                              |
| tetD-01      | 43B |       |       |      | CurveFitFailed               |
| tetD-02      | 43B |       |       |      | CurveFitFailed               |
| tetE         | 43B |       |       |      | LowEfficiency, CtIsSmall, S: |
| tetG-01      | 43B | 35.55 | 91.91 | 1.86 | MultipleMeltPeaks            |
| tetG-02      | 43B | 33.89 | 89.47 | 1.83 |                              |
| tetH         | 43B |       |       |      | CurveFitFailed               |
| tetJ         | 43B |       |       |      | CurveFitFailed               |
| tetK         | 43B |       |       |      | LowEfficiency, CtIsSmall, S: |
| tetL-01      | 43B |       |       |      | CurveFitFailed               |
| tetL-02      | 43B | 31.67 | 85.31 | 1.83 | MultipleMeltPeaks            |
| tetM-01      | 43B | 15.98 | 76.34 | 2.05 |                              |
| tetM-02      | 43B | 16    | 77.72 | 2.09 |                              |
| tetO-01      | 43B | 17    | 77.11 | 2.14 |                              |
| tetPA        | 43B |       |       |      | CurveFitFailed               |
| tetPB-01     | 43B |       |       |      | LowEfficiency, CtIsSmall, S: |
| tetPB-02     | 43B | 28.67 | 85.04 | 2.06 |                              |
| tetPB-03     | 43B |       |       |      | LowEfficiency, CtIsSmall, S: |
| tetPB-05     | 43B |       |       |      | LowEfficiency, CtIsSmall, S: |
| tetQ         | 43B | 23.28 | 77.48 | 1.99 |                              |
| tetR-02      | 43B | 32.22 | 89.78 | 1.93 |                              |
| tetR-03      | 43B | 19.01 | 76.35 | 2.01 |                              |
| tetS         | 43B | 36.44 | 86.17 | 1.87 |                              |

|             |     |       |       |      |                                          |
|-------------|-----|-------|-------|------|------------------------------------------|
| tetT        | 43B |       |       |      | LowEfficiency, CtIsSmall, S <sub>e</sub> |
| tetU-01     | 43B |       |       |      | LowEfficiency, CtIsSmall, S <sub>e</sub> |
| tetV        | 43B |       |       |      | LowEfficiency, CtIsSmall, S <sub>e</sub> |
| tetW-01     | 43B |       |       |      | CurveFitFailed                           |
| tetX        | 43B |       |       |      | BadR2, CtIsSmall, Saturatio              |
| tnpA-01     | 43B |       |       |      | LowEfficiency, CtIsSmall, S <sub>e</sub> |
| tnpA-02     | 43B |       |       |      | LowEfficiency, CtIsSmall, C <sub>i</sub> |
| tnpA-03     | 43B |       |       |      | CurveFitFailed                           |
| tnpA-04     | 43B | 29.59 | 82.36 | 1.91 |                                          |
| tnpA-05     | 43B | 28.41 | 80.84 | 1.88 |                                          |
| tnpA-07     | 43B |       |       |      | LowEfficiency, CtIsSmall, S <sub>e</sub> |
| tolC-01     | 43B | 29.18 | 78.79 | 1.9  |                                          |
| tolC-02     | 43B | 29.75 | 84.91 | 1.97 |                                          |
| tolC-03     | 43B | 31.49 | 86.08 | 1.93 |                                          |
| Tp614       | 43B | 36.27 | 77.63 | 1.9  |                                          |
| ttgA        | 43B | 36.08 | 91.46 | 1.73 |                                          |
| ttgB        | 43B |       |       |      | LowEfficiency, CtIsSmall, S <sub>e</sub> |
| vanA        | 43B |       |       |      | LowEfficiency, CtIsSmall, S <sub>e</sub> |
| vanB-01     | 43B | 34.05 | 85.6  | 1.96 | MultipleMeltPeaks                        |
| vanC-01     | 43B |       |       |      | LowEfficiency, CtIsSmall, C <sub>i</sub> |
| vanC-02     | 43B |       |       |      | LowEfficiency, CtIsSmall, S <sub>e</sub> |
| vanC-03     | 43B | 27.13 | 91.67 | 2.06 |                                          |
| vanC1       | 43B |       |       |      | LowEfficiency, CtIsSmall, S <sub>e</sub> |
| vanC2/vanC3 | 43B | 31.73 | 84.75 | 1.9  |                                          |
| vanG        | 43B |       |       |      | CurveFitFailed                           |
| vanHB       | 43B | 35.58 | 89.94 | 1.86 | MultipleMeltPeaks                        |
| vanHD       | 43B |       |       |      | CurveFitFailed                           |
| vanRA-01    | 43B |       |       |      | CurveFitFailed                           |
| vanRA-02    | 43B |       |       |      | LowEfficiency, CtIsSmall, C <sub>i</sub> |
| vanRB       | 43B | 33.31 | 85.67 | 2    |                                          |
| vanRC       | 43B |       |       |      | LowEfficiency, CtIsSmall, C <sub>i</sub> |
| vanRC4      | 43B |       |       |      | LowEfficiency, CtIsSmall, S <sub>e</sub> |
| vanRD       | 43B |       |       |      | BadR2, CtIsSmall, Saturatio              |
| vanSA       | 43B |       |       |      | LowEfficiency, CtIsSmall, C <sub>i</sub> |
| vanSB       | 43B | 33.44 | 74.01 | 1.98 |                                          |
| vanSC-01    | 43B | 30.65 | 84.23 | 2.12 |                                          |
| vanSC-02    | 43B |       |       |      | NoAmplification                          |
| vanTC-01    | 43B |       |       |      | CurveFitFailed                           |
| vanTC-02    | 43B | 38.28 | 86.65 | 1.63 |                                          |
| vanTE       | 43B |       |       |      | CurveFitFailed                           |
| vanTG       | 43B |       |       |      | LowEfficiency, CtIsSmall, S <sub>e</sub> |
| vanWB       | 43B |       |       |      | NoAmplification                          |
| vanWG       | 43B | 32.17 | 74.79 | 1.9  |                                          |
| vanXA       | 43B |       |       |      | LowEfficiency, CtIsSmall, S <sub>e</sub> |
| vanXB       | 43B |       |       |      | LowEfficiency, CtIsSmall, C <sub>i</sub> |
| vanXD       | 43B |       |       |      | CurveFitFailed                           |

|              |     |       |       |      |                              |
|--------------|-----|-------|-------|------|------------------------------|
| vanYB        | 43B |       |       |      | LowEfficiency, CtIsSmall, S: |
| vanYD-01     | 43B | 32.14 | 81.48 | 1.73 |                              |
| vanYD-02     | 43B |       |       |      | CurveFitFailed               |
| vatB-01      | 43B |       |       |      | LowEfficiency, CtIsSmall, S: |
| vatB-02      | 43B |       |       |      | CurveFitFailed               |
| vatC-01      | 43B |       |       |      | CurveFitFailed               |
| vatC-02      | 43B |       |       |      | CurveFitFailed               |
| vatE-01      | 43B | 32.4  | 75.94 | 2    |                              |
| vatE-02      | 43B |       |       |      | NoAmplification              |
| vgaA-01      | 43B |       |       |      | LowEfficiency, CtIsSmall, S: |
| vgaA-02      | 43B |       |       |      | LowEfficiency, CtIsSmall, S: |
| vgb-01       | 43B |       |       |      | LowEfficiency, CtIsSmall, S: |
| vgbB-01      | 43B |       |       |      | LowEfficiency, CtIsSmall, S: |
| vgbB-02      | 43B |       |       |      | LowEfficiency, CtIsSmall, S: |
| yceE/mdtG-0  | 43B | 27.34 | 80.65 | 1.97 |                              |
| yceE/mdtG-0  | 43B |       |       |      | LowEfficiency, CtIsSmall, S: |
| yceL/mdtH-0  | 43B | 33.76 | 82.46 | 1.88 |                              |
| yceL/mdtH-0  | 43B | 29.14 | 82.45 | 1.91 |                              |
| yceL/mdtH-0  | 43B | 32.28 | 79.6  | 1.89 |                              |
| yidY/mdtL-01 | 43B | 33.22 | 82.62 | 1.92 | MultipleMeltPeaks            |
| yidY/mdtL-02 | 43B | 34.78 | 75.19 | 1.74 |                              |































| Assay           | Sample | Ct | Tm    | Efficiency | flag                         |
|-----------------|--------|----|-------|------------|------------------------------|
| 16S rRNA        | 43C    |    | 14.06 | 82.38      | 2.07                         |
| aac             | 43C    |    | 31.05 | 81.01      | 2.01                         |
| aac(6')-Ib(akz) | 43C    |    |       |            | LowEfficiency, CtIsSmall, S: |
| aac(6')-Ib(akz) | 43C    |    | 34.31 | 86.23      | 1.91 MultipleMeltPeaks       |
| aac(6')-Ib(akz) | 43C    |    | 32.71 | 87.43      | 1.88                         |
| aac(6')-II      | 43C    |    |       |            | CurveFitFailed               |
| aac(6')I1       | 43C    |    | 35.64 | 87.16      | 1.75 MultipleMeltPeaks       |
| aacA/aphD       | 43C    |    |       |            | LowEfficiency, CtIsSmall, S: |
| aacC            | 43C    |    | 30.48 | 88.09      | 1.92                         |
| aacC1           | 43C    |    |       |            | NoAmplification              |
| aacC2           | 43C    |    |       |            | NoAmplification              |
| aacC4           | 43C    |    | 33.04 | 90.81      | 1.9                          |
| aadA-01         | 43C    |    |       |            | LowEfficiency, CtIsSmall, C: |
| aadA-02         | 43C    |    |       |            | CurveFitFailed               |
| aadA-1-01       | 43C    |    |       |            | NoAmplification              |
| aadA-1-02       | 43C    |    | 34.14 | 76.23      | 1.99                         |
| aadA1           | 43C    |    |       |            | BadR2, LowEfficiency, CtIsS: |
| aadA2-01        | 43C    |    |       |            | CurveFitFailed               |
| aadA2-02        | 43C    |    | 33.1  | 75.2       | 1.97                         |
| aadA2-03        | 43C    |    |       |            | CurveFitFailed               |
| aadA5-01        | 43C    |    | 31.21 | 83.16      | 1.96                         |
| aadA5-02        | 43C    |    | 33.01 | 87.07      | 1.95 MultipleMeltPeaks       |
| aadA9-01        | 43C    |    | 34.45 | 85.91      | 1.85                         |
| aadA9-02        | 43C    |    |       |            | LowEfficiency, CtIsSmall, S: |
| aadD            | 43C    |    |       |            | LowEfficiency, CtIsSmall, C: |
| aadE            | 43C    |    |       |            | LowEfficiency, CtIsSmall, S: |
| acrA-01         | 43C    |    | 27.39 | 88.77      | 1.96 MultipleMeltPeaks       |
| acrA-02         | 43C    |    | 32.01 | 88.27      | 1.91                         |
| acrA-03         | 43C    |    | 34.56 | 86.56      | 1.79                         |
| acrA-04         | 43C    |    | 32.42 | 80.19      | 1.74 MultipleMeltPeaks       |
| acrA-05         | 43C    |    | 30.48 | 86.36      | 1.96 MultipleMeltPeaks       |
| acrB-01         | 43C    |    | 36.06 | 76.18      | 1.93                         |
| acrF            | 43C    |    | 35.49 | 82.05      | 1.91                         |
| acrR-01         | 43C    |    | 34.58 | 90.77      | 1.8 MultipleMeltPeaks        |
| acrR-02         | 43C    |    |       |            | CurveFitFailed               |
| Actin           | 43C    |    | 21.14 | 87.04      | 1.92                         |
| adeA            | 43C    |    |       |            | CurveFitFailed               |
| ampC-01         | 43C    |    | 31.04 | 80.91      | 1.94                         |
| ampC-02         | 43C    |    | 36.93 | 80.28      | 1.86                         |
| ampC-04         | 43C    |    | 32.98 | 78.22      | 1.79 MultipleMeltPeaks       |
| ampC-05         | 43C    |    |       |            | CurveFitFailed               |
| ampC-06         | 43C    |    |       |            | LowEfficiency, CtIsSmall, C: |
| ampC-07         | 43C    |    |       |            | CurveFitFailed               |
| ampC-09         | 43C    |    |       |            | CurveFitFailed               |
| ampC/blaDH      | 43C    |    | 31.25 | 76.93      | 1.99 MultipleMeltPeaks       |

|               |     |       |       |      |                              |
|---------------|-----|-------|-------|------|------------------------------|
| aph           | 43C |       |       |      | LowEfficiency, CtIsSmall, Ci |
| aph(2')-Id-01 | 43C |       |       |      | LowEfficiency, CtIsSmall, Ci |
| aph(2')-Id-02 | 43C |       |       |      | LowEfficiency, CtIsSmall, S  |
| aph6ia        | 43C | 27.74 | 78.28 | 1.99 |                              |
| aphA1(aka k   | 43C |       |       |      | LowEfficiency, CtIsSmall, Ci |
| bacA-01       | 43C |       |       |      | BadR2, LowEfficiency, CtIsS  |
| bacA-02       | 43C |       |       |      | BadR2, LowEfficiency, CtIsS  |
| BETA-globin   | 43C | 21.44 | 84.09 | 1.97 |                              |
| bla-ACC-1     | 43C |       |       |      | CurveFitFailed               |
| bla-L1        | 43C | 30.29 | 85.03 | 2.02 |                              |
| bla1          | 43C |       |       |      | LowEfficiency, CtIsSmall, S  |
| blaCMY        | 43C | 31.54 | 80.2  | 1.91 |                              |
| blaCMY2-01    | 43C |       |       |      | NoAmplification              |
| blaCMY2-02    | 43C | 30.34 | 86.9  | 1.97 | MultipleMeltPeaks            |
| blaCTX-M-01   | 43C |       |       |      | CurveFitFailed               |
| blaCTX-M-02   | 43C |       |       |      | BadR2, LowEfficiency, CtIsS  |
| blaCTX-M-03   | 43C |       |       |      | CurveFitFailed               |
| blaCTX-M-04   | 43C | 35.76 | 88    | 1.86 |                              |
| blaCTX-M-05   | 43C |       |       |      | NoAmplification              |
| blaCTX-M-06   | 43C |       |       |      | BadR2, LowEfficiency, CtIsS  |
| blaGES        | 43C |       |       |      | LowEfficiency, CtIsSmall, Ci |
| blaIMP-01     | 43C |       |       |      | NoAmplification              |
| blaIMP-02     | 43C |       |       |      | LowEfficiency, CtIsSmall, Ci |
| blaMOX/blaC   | 43C |       |       |      | NoAmplification              |
| blaOCH        | 43C |       |       |      | NoAmplification              |
| blaOKP        | 43C |       |       |      | NoAmplification              |
| blaOXA1/blaC  | 43C |       |       |      | NoAmplification              |
| blaOXA10-01   | 43C |       |       |      | LowEfficiency, CtIsSmall, Ci |
| blaOXA10-02   | 43C |       |       |      | LowEfficiency, CtIsSmall, S  |
| blaOXY        | 43C |       |       |      | LowEfficiency, CtIsSmall, Ci |
| blaPAO        | 43C |       |       |      | LowEfficiency, CtIsSmall, Ci |
| blaPER        | 43C |       |       |      | LowEfficiency, CtIsSmall, S  |
| blaPSE        | 43C |       |       |      | LowEfficiency, CtIsSmall, Ci |
| blaROB        | 43C | 32.21 | 80.27 | 1.91 |                              |
| blaSFO        | 43C | 29.77 | 90.46 | 1.93 | MultipleMeltPeaks            |
| blaSHV-01     | 43C |       |       |      | LowEfficiency, CtIsSmall, Ci |
| blaSHV-02     | 43C |       |       |      | CurveFitFailed               |
| blaTEM        | 43C |       |       |      | NoAmplification              |
| blaTLA        | 43C |       |       |      | CurveFitFailed               |
| blaVEB        | 43C |       |       |      | NoAmplification              |
| blaVIM        | 43C |       |       |      | NoAmplification              |
| blaZ          | 43C | 30.14 | 73.54 | 1.81 |                              |
| carB          | 43C |       |       |      | CurveFitFailed               |
| catA1         | 43C |       |       |      | NoAmplification              |
| catB3         | 43C | 33.98 | 81.23 | 1.88 |                              |
| catB8         | 43C | 31.26 | 81.05 | 1.99 |                              |

|            |     |       |       |      |                                          |
|------------|-----|-------|-------|------|------------------------------------------|
| ceoA       | 43C | 29.51 | 82.14 | 1.99 | MultipleMeltPeaks                        |
| cepA       | 43C |       |       |      | CurveFitFailed                           |
| cfiA       | 43C |       |       |      | NoAmplification                          |
| cfr        | 43C |       |       |      | LowEfficiency, CtIsSmall, C <sub>i</sub> |
| cfxA       | 43C | 20.68 | 77.57 | 1.95 |                                          |
| cmeA       | 43C |       |       |      | CurveFitFailed                           |
| cmlA1-01   | 43C | 35.9  | 87.58 | 1.91 |                                          |
| cmlA1-02   | 43C | 32.68 | 89.85 | 1.84 |                                          |
| cmr        | 43C |       |       |      | NoAmplification                          |
| cmx(A)     | 43C | 30.98 | 84.72 | 1.72 |                                          |
| cphA-01    | 43C | 36.41 | 89.83 | 1.83 |                                          |
| cphA-02    | 43C | 37.87 | 82.34 | 1.79 |                                          |
| dfrA1      | 43C |       |       |      | NoAmplification                          |
| dfrA12     | 43C |       |       |      | CurveFitFailed                           |
| emrD       | 43C | 34.41 | 77.67 | 1.84 |                                          |
| ereA       | 43C | 37.99 | 82.48 | 1.75 |                                          |
| ereB       | 43C | 35.3  | 88.66 | 1.85 |                                          |
| erm(34)    | 43C | 39.03 | 86.45 | 1.9  | MultipleMeltPeaks                        |
| erm(35)    | 43C |       |       |      | CurveFitFailed                           |
| erm(36)    | 43C |       |       |      | LowEfficiency, CtIsSmall, S <sub>e</sub> |
| ermA       | 43C |       |       |      | LowEfficiency, CtIsSmall, C <sub>i</sub> |
| ermA/ermTR | 43C |       |       |      | NoAmplification                          |
| ermB       | 43C | 17.22 | 74.92 | 2.19 |                                          |
| ermC       | 43C | 28.09 | 75.49 | 1.84 |                                          |
| ermF       | 43C | 30    | 74.03 | 1.99 |                                          |
| ermJ/ermD  | 43C |       |       |      | CurveFitFailed                           |
| ermK-01    | 43C | 33.66 | 74.58 | 1.96 |                                          |
| ermK-02    | 43C |       |       |      | CurveFitFailed                           |
| ermT-01    | 43C |       |       |      | LowEfficiency, CtIsSmall, S <sub>e</sub> |
| ermT-02    | 43C |       |       |      | CurveFitFailed                           |
| ermX       | 43C |       |       |      | CurveFitFailed                           |
| ermY       | 43C |       |       |      | LowEfficiency, CtIsSmall, S <sub>e</sub> |
| fabK       | 43C | 22.52 | 78.72 | 2.23 |                                          |
| floR       | 43C | 35.8  | 83.86 | 1.87 |                                          |
| folA       | 43C |       |       |      | NoAmplification                          |
| fosB       | 43C |       |       |      | LowEfficiency, CtIsSmall, S <sub>e</sub> |
| fosX       | 43C |       |       |      | LowEfficiency, CtIsSmall, C <sub>i</sub> |
| fox5       | 43C | 28.11 | 87.03 | 2.01 |                                          |
| imiR       | 43C |       |       |      | LowEfficiency, CtIsSmall, C <sub>i</sub> |
| ImrA-01    | 43C | 37.55 | 82.69 | 2.03 |                                          |
| intl       | 43C | 31.03 | 84.52 | 1.93 |                                          |
| intl1      | 43C | 21.52 | 87.24 | 1.98 |                                          |
| IS613      | 43C | 25.79 | 80    | 2.06 |                                          |
| lnuA-01    | 43C |       |       |      | CurveFitFailed                           |
| lnuB-01    | 43C |       |       |      | LowEfficiency, CtIsSmall, C <sub>i</sub> |
| lnuB-02    | 43C |       |       |      | LowEfficiency, CtIsSmall, C <sub>i</sub> |

|                |     |       |       |      |                              |
|----------------|-----|-------|-------|------|------------------------------|
| lnuC           | 43C |       |       |      | CurveFitFailed               |
| marR-01        | 43C | 33.22 | 80.16 | 1.84 |                              |
| matA/mel       | 43C | 15.71 | 77.63 | 2.09 |                              |
| mdet1          | 43C |       |       |      | LowEfficiency, CtIsSmall, Ci |
| mdtA           | 43C |       |       |      | BadR2, LowEfficiency, CtIsS  |
| mdtE/yhiU      | 43C | 33.33 | 87.45 | 1.86 |                              |
| mecA           | 43C | 29.46 | 74.7  | 1.98 |                              |
| mefA           | 43C | 15.13 | 80.64 | 2.12 |                              |
| mepA           | 43C | 30.42 | 87.84 | 1.89 |                              |
| mexA           | 43C | 36.36 | 89.62 | 1.78 |                              |
| mexD           | 43C | 35.81 | 78.67 | 2    |                              |
| mexE           | 43C | 36.4  | 89.7  | 1.69 | MultipleMeltPeaks            |
| mexF           | 43C | 26.18 | 90.46 | 1.89 | MultipleMeltPeaks            |
| mphA-01        | 43C | 27.07 | 88.67 | 1.99 |                              |
| mphA-02        | 43C | 29.66 | 82.5  | 1.64 | MultipleMeltPeaks            |
| mphB           | 43C | 30.42 | 91.25 | 2.04 |                              |
| mphC           | 43C |       |       |      | LowEfficiency, CtIsSmall, Ci |
| msrA-01        | 43C |       |       |      | NoAmplification              |
| msrC-01        | 43C |       |       |      | NoAmplification              |
| mtrC-01        | 43C | 32.93 | 83.26 | 1.88 | MultipleMeltPeaks            |
| mtrC-02        | 43C |       |       |      | LowEfficiency, CtIsSmall, Ci |
| mtrD-02        | 43C | 28.7  | 81.56 | 1.9  | MultipleMeltPeaks            |
| mtrD-03        | 43C | 32.3  | 82.07 | 1.78 |                              |
| NDM1           | 43C |       |       |      | LowEfficiency, CtIsSmall, Ci |
| nimE           | 43C | 33.24 | 75.99 | 1.91 |                              |
| nisB           | 43C |       |       |      | CurveFitFailed               |
| oleC           | 43C | 30.5  | 88.9  | 1.88 |                              |
| oprD           | 43C | 29.11 | 87.89 | 1.96 |                              |
| oprJ           | 43C | 30.37 | 86.45 | 1.81 |                              |
| pbp            | 43C | 35.56 | 79.24 | 1.83 | MultipleMeltPeaks            |
| pbp2x          | 43C |       |       |      | CurveFitFailed               |
| Pbp5           | 43C |       |       |      | LowEfficiency, CtIsSmall, S: |
| penA           | 43C | 37.47 | 89.33 | 1.8  | MultipleMeltPeaks            |
| pikR1          | 43C |       |       |      | CurveFitFailed               |
| pikR2          | 43C | 30.97 | 84.83 | 2.19 |                              |
| pmrA           | 43C | 20.75 | 79.08 | 2.08 |                              |
| pncA           | 43C | 34.21 | 85.25 | 1.83 | MultipleMeltPeaks            |
| putative multi | 43C |       |       |      | LowEfficiency, CtIsSmall, S: |
| qac            | 43C |       |       |      | CurveFitFailed               |
| qacA           | 43C |       |       |      | BadR2, LowEfficiency, CtIsS  |
| qacA/qacB      | 43C |       |       |      | CurveFitFailed               |
| qacEdelta1-0   | 43C |       |       |      | LowEfficiency, CtIsSmall, S: |
| qacEdelta1-0   | 43C | 31.38 | 75.93 | 1.89 | MultipleMeltPeaks            |
| qacH-01        | 43C |       |       |      | BadR2, LowEfficiency, CtIsS  |
| qacH-02        | 43C | 33.17 | 84.09 | 1.68 |                              |
| qnrA           | 43C |       |       |      | NoAmplification              |

|              |     |       |       |      |                              |
|--------------|-----|-------|-------|------|------------------------------|
| rarD-02      | 43C | 30.94 | 80.02 | 1.94 |                              |
| sat4         | 43C |       |       |      | LowEfficiency, CtIsSmall, Ci |
| sdeB         | 43C |       |       |      | CurveFitFailed               |
| spcN-01      | 43C |       |       |      | LowEfficiency, CtIsSmall, Ci |
| speA         | 43C |       |       |      | NoAmplification              |
| str          | 43C |       |       |      | LowEfficiency, CtIsSmall, Ci |
| strA         | 43C |       |       |      | LowEfficiency, CtIsSmall, Ci |
| strB         | 43C | 29.57 | 83.84 | 1.91 |                              |
| sul1         | 43C | 34.34 | 89.8  | 1.71 |                              |
| sul2         | 43C |       |       |      | CurveFitFailed               |
| sulA/foIP-01 | 43C | 19.53 | 81.47 | 1.97 |                              |
| sulA/foIP-03 | 43C | 20.01 | 83.65 | 1.99 |                              |
| tet(32)      | 43C | 24.08 | 81.43 | 1.97 |                              |
| tet(34)      | 43C | 32.97 | 75.43 | 1.99 |                              |
| tet(35)      | 43C |       |       |      | NoAmplification              |
| tet(36)-A    | 43C |       |       |      | LowEfficiency, CtIsSmall, S: |
| tet(36)-B    | 43C |       |       |      | LowEfficiency, CtIsSmall, Ci |
| tet(37)      | 43C | 21.71 | 76.53 | 1.97 |                              |
| tetA-01      | 43C | 35.77 | 85.13 | 1.87 |                              |
| tetA-02      | 43C |       |       |      | CurveFitFailed               |
| tetB-01      | 43C | 23.83 | 79.95 | 1.93 |                              |
| tetB-02      | 43C | 23.61 | 79.81 | 2    |                              |
| tetC-01      | 43C | 24.04 | 75.25 | 1.92 |                              |
| tetC-02      | 43C | 23.66 | 76.15 | 2.06 |                              |
| tetD-01      | 43C |       |       |      | LowEfficiency, CtIsSmall, Ci |
| tetD-02      | 43C |       |       |      | CurveFitFailed               |
| tetE         | 43C |       |       |      | LowEfficiency, CtIsSmall, Ci |
| tetG-01      | 43C | 36.78 | 82.48 | 1.75 | MultipleMeltPeaks            |
| tetG-02      | 43C | 32.26 | 87.86 | 1.95 |                              |
| tetH         | 43C |       |       |      | LowEfficiency, CtIsSmall, Ci |
| tetJ         | 43C |       |       |      | CurveFitFailed               |
| tetK         | 43C |       |       |      | CurveFitFailed               |
| tetL-01      | 43C |       |       |      | LowEfficiency, CtIsSmall, Ci |
| tetL-02      | 43C |       |       |      | LowEfficiency, CtIsSmall, Ci |
| tetM-01      | 43C | 16.26 | 76.26 | 2.08 |                              |
| tetM-02      | 43C | 16.19 | 77.66 | 2.13 |                              |
| tetO-01      | 43C | 19.51 | 76.96 | 2.05 |                              |
| tetPA        | 43C |       |       |      | LowEfficiency, CtIsSmall, Ci |
| tetPB-01     | 43C | 36.37 | 90.3  | 1.79 |                              |
| tetPB-02     | 43C | 29.49 | 84.86 | 2.03 |                              |
| tetPB-03     | 43C |       |       |      | LowEfficiency, CtIsSmall, Ci |
| tetPB-05     | 43C |       |       |      | LowEfficiency, CtIsSmall, Ci |
| tetQ         | 43C | 25.45 | 77.27 | 2.08 |                              |
| tetR-02      | 43C | 31.41 | 89.83 | 1.8  |                              |
| tetR-03      | 43C | 24.01 | 76.27 | 1.97 |                              |
| tetS         | 43C | 37.6  | 86.23 | 1.85 |                              |

|             |     |       |       |      |                              |
|-------------|-----|-------|-------|------|------------------------------|
| tetT        | 43C |       |       |      | CurveFitFailed               |
| tetU-01     | 43C |       |       |      | NoAmplification              |
| tetV        | 43C |       |       |      | LowEfficiency, CtIsSmall, S: |
| tetW-01     | 43C |       |       |      | CurveFitFailed               |
| tetX        | 43C | 35.03 | 74.06 | 1.94 |                              |
| tnpA-01     | 43C |       |       |      | LowEfficiency, CtIsSmall, Ci |
| tnpA-02     | 43C | 40.48 | 86.82 | 1.79 | MultipleMeltPeaks            |
| tnpA-03     | 43C |       |       |      | LowEfficiency, CtIsSmall, Ci |
| tnpA-04     | 43C | 28.79 | 82.41 | 1.91 |                              |
| tnpA-05     | 43C | 28.57 | 80.76 | 1.9  |                              |
| tnpA-07     | 43C |       |       |      | LowEfficiency, CtIsSmall, Ci |
| tolC-01     | 43C | 30.21 | 78.66 | 1.9  |                              |
| tolC-02     | 43C | 29.07 | 85.42 | 1.94 |                              |
| tolC-03     | 43C | 33.05 | 85.45 | 1.92 |                              |
| Tp614       | 43C |       |       |      | LowEfficiency, CtIsSmall, S: |
| ttgA        | 43C | 35.58 | 86.88 | 1.87 |                              |
| ttgB        | 43C |       |       |      | CurveFitFailed               |
| vanA        | 43C |       |       |      | NoAmplification              |
| vanB-01     | 43C | 35.12 | 76.29 | 1.63 | MultipleMeltPeaks            |
| vanC-01     | 43C |       |       |      | NoAmplification              |
| vanC-02     | 43C |       |       |      | LowEfficiency, CtIsSmall, S: |
| vanC-03     | 43C | 26.54 | 91.62 | 2.01 |                              |
| vanC1       | 43C |       |       |      | LowEfficiency, CtIsSmall, Ci |
| vanC2/vanC3 | 43C | 34.37 | 84.79 | 1.96 |                              |
| vanG        | 43C |       |       |      | CurveFitFailed               |
| vanHB       | 43C | 34.96 | 90.23 | 1.84 |                              |
| vanHD       | 43C | 37.52 | 80.98 | 1.81 | MultipleMeltPeaks            |
| vanRA-01    | 43C |       |       |      | LowEfficiency, CtIsSmall, Ci |
| vanRA-02    | 43C |       |       |      | CurveFitFailed               |
| vanRB       | 43C | 33.1  | 85.57 | 1.92 |                              |
| vanRC       | 43C |       |       |      | LowEfficiency, CtIsSmall, Ci |
| vanRC4      | 43C |       |       |      | CurveFitFailed               |
| vanRD       | 43C |       |       |      | BadR2, CtIsSmall, Saturatio  |
| vanSA       | 43C |       |       |      | LowEfficiency, CtIsSmall, Ci |
| vanSB       | 43C | 31.64 | 74.16 | 2    |                              |
| vanSC-01    | 43C | 33.41 | 77.84 | 2.08 | MultipleMeltPeaks            |
| vanSC-02    | 43C |       |       |      | NoAmplification              |
| vanTC-01    | 43C |       |       |      | CurveFitFailed               |
| vanTC-02    | 43C |       |       |      | LowEfficiency, CtIsSmall, Ci |
| vanTE       | 43C |       |       |      | LowEfficiency, CtIsSmall, Ci |
| vanTG       | 43C |       |       |      | BadR2, CtIsSmall, Saturatio  |
| vanWB       | 43C |       |       |      | LowEfficiency, CtIsSmall, Ci |
| vanWG       | 43C |       |       |      | LowEfficiency, CtIsSmall, S: |
| vanXA       | 43C |       |       |      | LowEfficiency, CtIsSmall, S: |
| vanXB       | 43C |       |       |      | NoAmplification              |
| vanXD       | 43C |       |       |      | NoAmplification              |

|              |     |       |       |      |                                          |
|--------------|-----|-------|-------|------|------------------------------------------|
| vanYB        | 43C | 31.99 | 75.03 | 1.98 | MultipleMeltPeaks                        |
| vanYD-01     | 43C | 30.46 | 89.02 | 1.98 |                                          |
| vanYD-02     | 43C |       |       |      | CurveFitFailed                           |
| vatB-01      | 43C |       |       |      | LowEfficiency, CtIsSmall, S <sub>e</sub> |
| vatB-02      | 43C |       |       |      | LowEfficiency, CtIsSmall, S <sub>e</sub> |
| vatC-01      | 43C |       |       |      | LowEfficiency, CtIsSmall, S <sub>e</sub> |
| vatC-02      | 43C | 38.02 | 87.5  | 1.78 |                                          |
| vatE-01      | 43C | 30.67 | 74.64 | 2.06 |                                          |
| vatE-02      | 43C |       |       |      | NoAmplification                          |
| vgaA-01      | 43C |       |       |      | LowEfficiency, CtIsSmall, C <sub>i</sub> |
| vgaA-02      | 43C |       |       |      | LowEfficiency, CtIsSmall, S <sub>e</sub> |
| vgb-01       | 43C |       |       |      | BadR2, LowEfficiency, CtIsS              |
| vgbB-01      | 43C |       |       |      | BadR2, LowEfficiency, CtIsS              |
| vgbB-02      | 43C |       |       |      | LowEfficiency, CtIsSmall, C <sub>i</sub> |
| yceE/mdtG-0  | 43C | 28.7  | 80.62 | 1.98 |                                          |
| yceE/mdtG-0  | 43C |       |       |      | BadR2, LowEfficiency, CtIsS              |
| yceL/mdtH-0  | 43C | 32.76 | 84.7  | 1.85 |                                          |
| yceL/mdtH-0  | 43C |       |       |      | LowEfficiency, CtIsSmall, C <sub>i</sub> |
| yceL/mdtH-0  | 43C | 29.81 | 78.79 | 1.96 |                                          |
| yidY/mdtL-01 | 43C | 32.56 | 84.48 | 1.99 | MultipleMeltPeaks                        |
| yidY/mdtL-02 | 43C | 36.56 | 92.55 | 1.77 | MultipleMeltPeaks                        |































| Assay          | Sample | Ct | Tm    | Efficiency | flag                   |
|----------------|--------|----|-------|------------|------------------------|
| 16S rRNA       | 44A    |    | 15.65 | 82.2       | 1.97                   |
| aac            | 44A    |    |       |            | CurveFitFailed         |
| aac(6')-Ib(akz | 44A    |    |       |            | NoAmplification        |
| aac(6')-Ib(akz | 44A    |    | 36.1  | 79.32      | 1.84 MultipleMeltPeaks |
| aac(6')-Ib(akz | 44A    |    | 34.8  | 86.25      | 1.85                   |
| aac(6')-II     | 44A    |    | 37.46 | 84.22      | 1.79                   |
| aac(6')I1      | 44A    |    |       |            | CurveFitFailed         |
| aacA/aphD      | 44A    |    |       |            | NoAmplification        |
| aacC           | 44A    |    | 29.61 | 89.98      | 1.82                   |
| aacC1          | 44A    |    |       |            | NoAmplification        |
| aacC2          | 44A    |    |       |            | NoAmplification        |
| aacC4          | 44A    |    | 33.89 | 89.85      | 1.88                   |
| aadA-01        | 44A    |    |       |            | NoAmplification        |
| aadA-02        | 44A    |    |       |            | NoAmplification        |
| aadA-1-01      | 44A    |    |       |            | NoAmplification        |
| aadA-1-02      | 44A    |    |       |            | NoAmplification        |
| aadA1          | 44A    |    |       |            | NoAmplification        |
| aadA2-01       | 44A    |    |       |            | NoAmplification        |
| aadA2-02       | 44A    |    |       |            | NoAmplification        |
| aadA2-03       | 44A    |    | 29.34 | 81.02      | 1.95                   |
| aadA5-01       | 44A    |    |       |            | NoAmplification        |
| aadA5-02       | 44A    |    | 31.57 | 78.45      | 1.98                   |
| aadA9-01       | 44A    |    |       |            | NoAmplification        |
| aadA9-02       | 44A    |    |       |            | NoAmplification        |
| aadD           | 44A    |    |       |            | NoAmplification        |
| aadE           | 44A    |    | 36.96 | 72.12      | 1.87                   |
| acrA-01        | 44A    |    | 28.79 | 82.58      | 1.95                   |
| acrA-02        | 44A    |    | 32.52 | 90.19      | 1.92                   |
| acrA-03        | 44A    |    |       |            | CurveFitFailed         |
| acrA-04        | 44A    |    | 30.76 | 85.89      | 2 MultipleMeltPeaks    |
| acrA-05        | 44A    |    | 29.13 | 86.69      | 1.95                   |
| acrB-01        | 44A    |    | 37.95 | 89.74      | 1.66                   |
| acrF           | 44A    |    | 29.14 | 82.61      | 1.91                   |
| acrR-01        | 44A    |    | 36.1  | 89.51      | 1.8                    |
| acrR-02        | 44A    |    | 40.7  | 82.82      | 1.77                   |
| Actin          | 44A    |    | 26.34 | 83.7       | 1.93 MultipleMeltPeaks |
| adeA           | 44A    |    | 34.52 | 85.53      | 1.87                   |
| ampC-01        | 44A    |    | 35.24 | 79.7       | 1.93 MultipleMeltPeaks |
| ampC-02        | 44A    |    | 38.55 | 88.67      | 1.93 MultipleMeltPeaks |
| ampC-04        | 44A    |    |       |            | CurveFitFailed         |
| ampC-05        | 44A    |    |       |            | NoAmplification        |
| ampC-06        | 44A    |    | 35.02 | 88.39      | 1.85                   |
| ampC-07        | 44A    |    |       |            | CurveFitFailed         |
| ampC-09        | 44A    |    |       |            | NoAmplification        |
| ampC/blaDH     | 44A    |    | 38.11 | 77.1       | 1.61 MultipleMeltPeaks |

|                          |     |       |       |      |                   |
|--------------------------|-----|-------|-------|------|-------------------|
| aph                      | 44A |       |       |      | NoAmplification   |
| aph(2')-Id-01            | 44A |       |       |      | NoAmplification   |
| aph(2')-Id-02            | 44A |       |       |      | NoAmplification   |
| aph6ia                   | 44A | 33.07 | 77.79 | 1.96 | MultipleMeltPeaks |
| aphA1(aka k <sub>z</sub> | 44A |       |       |      | NoAmplification   |
| bacA-01                  | 44A | 38.7  | 85.34 | 1.8  | MultipleMeltPeaks |
| bacA-02                  | 44A |       |       |      | NoAmplification   |
| BETA-globin              | 44A | 27.74 | 84    | 2    |                   |
| bla-ACC-1                | 44A |       |       |      | NoAmplification   |
| bla-L1                   | 44A | 32.3  | 84.72 | 1.93 |                   |
| bla1                     | 44A |       |       |      | NoAmplification   |
| blaCMY                   | 44A | 34.26 | 87.41 | 1.91 | MultipleMeltPeaks |
| blaCMY2-01               | 44A | 35.26 | 74.78 | 1.98 |                   |
| blaCMY2-02               | 44A | 33.61 | 77.38 | 1.91 | MultipleMeltPeaks |
| blaCTX-M-01              | 44A | 32.13 | 87.57 | 2.01 |                   |
| blaCTX-M-02              | 44A |       |       |      | NoAmplification   |
| blaCTX-M-03              | 44A |       |       |      | NoAmplification   |
| blaCTX-M-04              | 44A | 35.35 | 78.63 | 1.93 |                   |
| blaCTX-M-05              | 44A | 36.11 | 76.12 | 1.66 |                   |
| blaCTX-M-06              | 44A |       |       |      | NoAmplification   |
| blaGES                   | 44A |       |       |      | NoAmplification   |
| blaIMP-01                | 44A |       |       |      | NoAmplification   |
| blaIMP-02                | 44A |       |       |      | NoAmplification   |
| blaMOX/blaC              | 44A |       |       |      | NoAmplification   |
| blaOCH                   | 44A |       |       |      | NoAmplification   |
| blaOKP                   | 44A |       |       |      | NoAmplification   |
| blaOXA1/blaC             | 44A |       |       |      | NoAmplification   |
| blaOXA10-01              | 44A |       |       |      | NoAmplification   |
| blaOXA10-02              | 44A |       |       |      | NoAmplification   |
| blaOXY                   | 44A |       |       |      | NoAmplification   |
| blaPAO                   | 44A |       |       |      | NoAmplification   |
| blaPER                   | 44A |       |       |      | NoAmplification   |
| blaPSE                   | 44A |       |       |      | NoAmplification   |
| blaROB                   | 44A | 43.92 | 79.26 | 1.66 |                   |
| blaSFO                   | 44A | 31.84 | 78.33 | 1.85 | MultipleMeltPeaks |
| blaSHV-01                | 44A |       |       |      | NoAmplification   |
| blaSHV-02                | 44A |       |       |      | CurveFitFailed    |
| blaTEM                   | 44A | 27.33 | 79.42 | 1.96 |                   |
| blaTLA                   | 44A |       |       |      | NoAmplification   |
| blaVEB                   | 44A |       |       |      | NoAmplification   |
| blaVIM                   | 44A | 38.79 | 62.62 | 1.79 | MultipleMeltPeaks |
| blaZ                     | 44A | 27.26 | 73.66 | 1.98 |                   |
| carB                     | 44A |       |       |      | CurveFitFailed    |
| catA1                    | 44A |       |       |      | NoAmplification   |
| catB3                    | 44A |       |       |      | NoAmplification   |
| catB8                    | 44A | 30.64 | 81.49 | 1.95 |                   |

|            |     |       |       |      |                              |
|------------|-----|-------|-------|------|------------------------------|
| ceoA       | 44A | 35.04 | 92.19 | 1.75 |                              |
| cepA       | 44A |       |       |      | NoAmplification              |
| cfiA       | 44A |       |       |      | NoAmplification              |
| cfr        | 44A |       |       |      | NoAmplification              |
| cfxA       | 44A | 20.28 | 77.54 | 1.95 |                              |
| cmeA       | 44A |       |       |      | NoAmplification              |
| cmlA1-01   | 44A |       |       |      | NoAmplification              |
| cmlA1-02   | 44A | 38.97 | 81.6  | 1.78 |                              |
| cmr        | 44A |       |       |      | NoAmplification              |
| cmx(A)     | 44A | 35.08 | 86.3  | 1.88 |                              |
| cphA-01    | 44A |       |       |      | NoAmplification              |
| cphA-02    | 44A |       |       |      | CurveFitFailed               |
| dfrA1      | 44A |       |       |      | NoAmplification              |
| dfrA12     | 44A |       |       |      | NoAmplification              |
| emrD       | 44A | 33.38 | 90.63 | 1.77 |                              |
| ereA       | 44A |       |       |      | NoAmplification              |
| ereB       | 44A |       |       |      | CurveFitFailed               |
| erm(34)    | 44A |       |       |      | NoAmplification              |
| erm(35)    | 44A |       |       |      | NoAmplification              |
| erm(36)    | 44A | 39.36 | 81.24 | 1.8  |                              |
| ermA       | 44A |       |       |      | NoAmplification              |
| ermA/ermTR | 44A |       |       |      | NoAmplification              |
| ermB       | 44A | 24.64 | 75.03 | 2.06 |                              |
| ermC       | 44A |       |       |      | NoAmplification              |
| ermF       | 44A | 25.01 | 74.65 | 1.99 |                              |
| ermJ/ermD  | 44A |       |       |      | NoAmplification              |
| ermK-01    | 44A | 34.09 | 74.41 | 2.01 |                              |
| ermK-02    | 44A |       |       |      | NoAmplification              |
| ermT-01    | 44A |       |       |      | NoAmplification              |
| ermT-02    | 44A |       |       |      | NoAmplification              |
| ermX       | 44A | 26.62 | 83.5  | 1.91 |                              |
| ermY       | 44A | 33.67 | 75.6  | 2.01 |                              |
| fabK       | 44A | 24.64 | 78.82 | 2.14 |                              |
| floR       | 44A |       |       |      | NoAmplification              |
| folA       | 44A |       |       |      | NoAmplification              |
| fosB       | 44A |       |       |      | LowEfficiency, CtIsSmall, S: |
| fosX       | 44A |       |       |      | NoAmplification              |
| fox5       | 44A | 34.89 | 86.43 | 1.87 |                              |
| imiR       | 44A |       |       |      | NoAmplification              |
| ImrA-01    | 44A |       |       |      | NoAmplification              |
| intl       | 44A |       |       |      | CurveFitFailed               |
| intl1      | 44A | 24.24 | 87.06 | 2    | MultipleMeltPeaks            |
| IS613      | 44A | 19.74 | 79.88 | 2.02 |                              |
| lnuA-01    | 44A | 27.36 | 72.93 | 2.01 |                              |
| lnuB-01    | 44A |       |       |      | NoAmplification              |
| lnuB-02    | 44A |       |       |      | NoAmplification              |

|                |     |       |       |      |                   |
|----------------|-----|-------|-------|------|-------------------|
| lnuC           | 44A |       |       |      | CurveFitFailed    |
| marR-01        | 44A | 39.05 | 84.04 | 1.77 | MultipleMeltPeaks |
| matA/mel       | 44A | 18.42 | 77.7  | 2.05 |                   |
| mdet1          | 44A |       |       |      | NoAmplification   |
| mdtA           | 44A |       |       |      | NoAmplification   |
| mdtE/yhiU      | 44A | 36.85 | 90.21 | 1.7  |                   |
| mecA           | 44A |       |       |      | NoAmplification   |
| mefA           | 44A | 17.7  | 80.5  | 1.98 |                   |
| mepA           | 44A | 38.84 | 90.62 | 1.71 | MultipleMeltPeaks |
| mexA           | 44A |       |       |      | NoAmplification   |
| mexD           | 44A |       |       |      | NoAmplification   |
| mexE           | 44A | 35.89 | 87.77 | 1.79 |                   |
| mexF           | 44A | 29.71 | 81.36 | 1.88 | MultipleMeltPeaks |
| mphA-01        | 44A | 28.95 | 89.66 | 1.92 |                   |
| mphA-02        | 44A | 33.2  | 89.17 | 1.57 |                   |
| mphB           | 44A | 38.39 | 88.76 | 1.74 | MultipleMeltPeaks |
| mphC           | 44A |       |       |      | NoAmplification   |
| msrA-01        | 44A | 27.29 | 76.64 | 2.03 |                   |
| msrC-01        | 44A |       |       |      | NoAmplification   |
| mtrC-01        | 44A | 37.65 | 87.1  | 1.72 | MultipleMeltPeaks |
| mtrC-02        | 44A |       |       |      | NoAmplification   |
| mtrD-02        | 44A | 30.52 | 81.48 | 1.98 |                   |
| mtrD-03        | 44A |       |       |      | CurveFitFailed    |
| NDM1           | 44A |       |       |      | NoAmplification   |
| nimE           | 44A |       |       |      | CurveFitFailed    |
| nisB           | 44A |       |       |      | NoAmplification   |
| oleC           | 44A | 34.92 | 82.3  | 1.86 | MultipleMeltPeaks |
| oprD           | 44A | 30.77 | 88.85 | 1.97 |                   |
| oprJ           | 44A | 34.27 | 90.77 | 1.81 | MultipleMeltPeaks |
| pbp            | 44A |       |       |      | NoAmplification   |
| pbp2x          | 44A | 29.75 | 75.52 | 1.93 |                   |
| Pbp5           | 44A |       |       |      | NoAmplification   |
| penA           | 44A | 40.19 | 65.43 | 1.61 | MultipleMeltPeaks |
| pikR1          | 44A | 37.52 | 89.46 | 1.83 | MultipleMeltPeaks |
| pikR2          | 44A | 31.11 | 91.21 | 2.05 |                   |
| pmrA           | 44A | 20.58 | 79.06 | 2.07 |                   |
| pncA           | 44A | 26.14 | 84.39 | 1.9  |                   |
| putative multi | 44A |       |       |      | NoAmplification   |
| qac            | 44A |       |       |      | NoAmplification   |
| qacA           | 44A | 28.33 | 80.89 | 2.01 |                   |
| qacA/qacB      | 44A |       |       |      | NoAmplification   |
| qacEdelta1-0   | 44A |       |       |      | NoAmplification   |
| qacEdelta1-0   | 44A | 32.42 | 90.93 | 1.78 |                   |
| qacH-01        | 44A | 27.89 | 84.85 | 1.93 | MultipleMeltPeaks |
| qacH-02        | 44A |       |       |      | CurveFitFailed    |
| qnrA           | 44A | 29.21 | 83.07 | 1.98 |                   |



|              |     |       |       |      |                   |
|--------------|-----|-------|-------|------|-------------------|
| rarD-02      | 44A |       |       |      | NoAmplification   |
| sat4         | 44A |       |       |      | NoAmplification   |
| sdeB         | 44A |       |       |      | NoAmplification   |
| spcN-01      | 44A |       |       |      | NoAmplification   |
| speA         | 44A | 33.81 | 73.89 | 1.95 |                   |
| str          | 44A |       |       |      | NoAmplification   |
| strA         | 44A |       |       |      | NoAmplification   |
| strB         | 44A |       |       |      | NoAmplification   |
| sul1         | 44A |       |       |      | NoAmplification   |
| sul2         | 44A |       |       |      | CurveFitFailed    |
| sulA/foIP-01 | 44A | 20.57 | 81.15 | 1.99 |                   |
| sulA/foIP-03 | 44A | 19.83 | 83.22 | 1.95 |                   |
| tet(32)      | 44A | 24.8  | 81.31 | 1.98 |                   |
| tet(34)      | 44A | 32.88 | 75.46 | 2    |                   |
| tet(35)      | 44A | 36.53 | 75.67 | 1.89 |                   |
| tet(36)-A    | 44A |       |       |      | NoAmplification   |
| tet(36)-B    | 44A |       |       |      | NoAmplification   |
| tet(37)      | 44A | 22.17 | 76.6  | 1.98 |                   |
| tetA-01      | 44A |       |       |      | NoAmplification   |
| tetA-02      | 44A |       |       |      | CurveFitFailed    |
| tetB-01      | 44A |       |       |      | CurveFitFailed    |
| tetB-02      | 44A | 35.29 | 75.46 | 1.89 |                   |
| tetC-01      | 44A |       |       |      | NoAmplification   |
| tetC-02      | 44A | 29.47 | 75.99 | 2.01 |                   |
| tetD-01      | 44A |       |       |      | NoAmplification   |
| tetD-02      | 44A | 39.37 | 88.1  | 1.73 | MultipleMeltPeaks |
| tetE         | 44A |       |       |      | NoAmplification   |
| tetG-01      | 44A | 32.58 | 75.84 | 2    |                   |
| tetG-02      | 44A |       |       |      | CurveFitFailed    |
| tetH         | 44A |       |       |      | NoAmplification   |
| tetJ         | 44A |       |       |      | NoAmplification   |
| tetK         | 44A |       |       |      | NoAmplification   |
| tetL-01      | 44A |       |       |      | NoAmplification   |
| tetL-02      | 44A | 38.74 | 82.89 | 1.77 |                   |
| tetM-01      | 44A | 17.72 | 76.12 | 2    |                   |
| tetM-02      | 44A | 17.94 | 77.56 | 2.02 |                   |
| tetO-01      | 44A | 22.22 | 76.89 | 2.02 |                   |
| tetPA        | 44A |       |       |      | NoAmplification   |
| tetPB-01     | 44A |       |       |      | NoAmplification   |
| tetPB-02     | 44A | 41.35 | 75.91 | 1.72 | MultipleMeltPeaks |
| tetPB-03     | 44A |       |       |      | NoAmplification   |
| tetPB-05     | 44A |       |       |      | NoAmplification   |
| tetQ         | 44A | 24.14 | 76.37 | 1.99 |                   |
| tetR-02      | 44A | 31.28 | 86.34 | 1.91 |                   |
| tetR-03      | 44A |       |       |      | NoAmplification   |
| tetS         | 44A | 40.01 | 87.38 | 1.72 | MultipleMeltPeaks |

|             |     |       |       |      |                   |
|-------------|-----|-------|-------|------|-------------------|
| tetT        | 44A |       |       |      | NoAmplification   |
| tetU-01     | 44A |       |       |      | NoAmplification   |
| tetV        | 44A |       |       |      | NoAmplification   |
| tetW-01     | 44A | 22.04 | 81.93 | 1.98 |                   |
| tetX        | 44A |       |       |      | NoAmplification   |
| tnpA-01     | 44A |       |       |      | NoAmplification   |
| tnpA-02     | 44A | 35.21 | 88.8  | 1.79 |                   |
| tnpA-03     | 44A | 28.86 | 77.76 | 2.04 |                   |
| tnpA-04     | 44A | 29.08 | 82.33 | 1.92 |                   |
| tnpA-05     | 44A | 27.97 | 80.78 | 1.92 |                   |
| tnpA-07     | 44A |       |       |      | NoAmplification   |
| tolC-01     | 44A | 33.39 | 82.21 | 1.91 |                   |
| tolC-02     | 44A | 27.02 | 77.02 | 1.99 |                   |
| tolC-03     | 44A | 34.18 | 79.56 | 1.88 |                   |
| Tp614       | 44A |       |       |      | NoAmplification   |
| ttgA        | 44A | 30.83 | 84.33 | 1.93 |                   |
| ttgB        | 44A |       |       |      | NoAmplification   |
| vanA        | 44A |       |       |      | NoAmplification   |
| vanB-01     | 44A |       |       |      | CurveFitFailed    |
| vanC-01     | 44A |       |       |      | NoAmplification   |
| vanC-02     | 44A |       |       |      | NoAmplification   |
| vanC-03     | 44A | 30.83 | 89.44 | 1.89 | MultipleMeltPeaks |
| vanC1       | 44A |       |       |      | NoAmplification   |
| vanC2/vanC3 | 44A | 44.75 | 61.2  | 1.49 | MultipleMeltPeaks |
| vanG        | 44A |       |       |      | NoAmplification   |
| vanHB       | 44A | 33.43 | 87.33 | 1.89 |                   |
| vanHD       | 44A |       |       |      | NoAmplification   |
| vanRA-01    | 44A |       |       |      | NoAmplification   |
| vanRA-02    | 44A |       |       |      | NoAmplification   |
| vanRB       | 44A |       |       |      | CurveFitFailed    |
| vanRC       | 44A |       |       |      | NoAmplification   |
| vanRC4      | 44A |       |       |      | NoAmplification   |
| vanRD       | 44A |       |       |      | NoAmplification   |
| vanSA       | 44A |       |       |      | NoAmplification   |
| vanSB       | 44A | 35.87 | 73.28 | 2.09 |                   |
| vanSC-01    | 44A |       |       |      | NoAmplification   |
| vanSC-02    | 44A |       |       |      | NoAmplification   |
| vanTC-01    | 44A |       |       |      | NoAmplification   |
| vanTC-02    | 44A |       |       |      | NoAmplification   |
| vanTE       | 44A |       |       |      | NoAmplification   |
| vanTG       | 44A |       |       |      | NoAmplification   |
| vanWB       | 44A |       |       |      | NoAmplification   |
| vanWG       | 44A | 34.57 | 74.29 | 1.94 |                   |
| vanXA       | 44A |       |       |      | CurveFitFailed    |
| vanXB       | 44A |       |       |      | NoAmplification   |
| vanXD       | 44A | 30.7  | 75.53 | 2.03 |                   |

|              |     |       |       |      |                   |
|--------------|-----|-------|-------|------|-------------------|
| vanYB        | 44A |       |       |      | NoAmplification   |
| vanYD-01     | 44A | 41.55 | 76.99 | 1.53 | MultipleMeltPeaks |
| vanYD-02     | 44A |       |       |      | NoAmplification   |
| vatB-01      | 44A |       |       |      | NoAmplification   |
| vatB-02      | 44A |       |       |      | CurveFitFailed    |
| vatC-01      | 44A | 40.72 | 72.6  | 1.85 |                   |
| vatC-02      | 44A |       |       |      | NoAmplification   |
| vatE-01      | 44A | 30.47 | 76.81 | 2.06 |                   |
| vatE-02      | 44A |       |       |      | NoAmplification   |
| vgaA-01      | 44A |       |       |      | NoAmplification   |
| vgaA-02      | 44A |       |       |      | CurveFitFailed    |
| vgb-01       | 44A |       |       |      | NoAmplification   |
| vgbB-01      | 44A |       |       |      | NoAmplification   |
| vgbB-02      | 44A |       |       |      | NoAmplification   |
| yceE/mdtG-0  | 44A |       |       |      | NoAmplification   |
| yceE/mdtG-0  | 44A |       |       |      | NoAmplification   |
| yceL/mdtH-0  | 44A | 27.73 | 88.77 | 1.97 | MultipleMeltPeaks |
| yceL/mdtH-0  | 44A |       |       |      | NoAmplification   |
| yceL/mdtH-0  | 44A | 35.04 | 86.88 | 1.69 |                   |
| yidY/mdtL-01 | 44A | 35.96 | 78.84 | 1.85 | MultipleMeltPeaks |
| yidY/mdtL-02 | 44A |       |       |      | CurveFitFailed    |































| Assay          | Sample | Ct | Tm    | Efficiency | flag                   |
|----------------|--------|----|-------|------------|------------------------|
| 16S rRNA       | 44B    |    | 13.41 | 82.23      | 1.96                   |
| aac            | 44B    |    | 33.16 | 82.82      | 1.91 MultipleMeltPeaks |
| aac(6')-Ib(akz | 44B    |    |       |            | NoAmplification        |
| aac(6')-Ib(akz | 44B    |    | 32.72 | 86.28      | 1.92                   |
| aac(6')-Ib(akz | 44B    |    | 40.57 | 62.43      | 1.76 MultipleMeltPeaks |
| aac(6')-II     | 44B    |    | 37.41 | 76.43      | 1.79                   |
| aac(6')I1      | 44B    |    |       |            | NoAmplification        |
| aacA/aphD      | 44B    |    |       |            | NoAmplification        |
| aacC           | 44B    |    | 26.44 | 89.98      | 1.84                   |
| aacC1          | 44B    |    |       |            | CurveFitFailed         |
| aacC2          | 44B    |    |       |            | NoAmplification        |
| aacC4          | 44B    |    | 34.11 | 89.78      | 1.87                   |
| aadA-01        | 44B    |    |       |            | NoAmplification        |
| aadA-02        | 44B    |    | 36.59 | 80.53      | 1.88                   |
| aadA-1-01      | 44B    |    |       |            | NoAmplification        |
| aadA-1-02      | 44B    |    |       |            | NoAmplification        |
| aadA1          | 44B    |    | 30.12 | 79.32      | 1.98                   |
| aadA2-01       | 44B    |    | 28.78 | 80.79      | 1.89                   |
| aadA2-02       | 44B    |    |       |            | NoAmplification        |
| aadA2-03       | 44B    |    | 29.21 | 81.47      | 1.94                   |
| aadA5-01       | 44B    |    |       |            | NoAmplification        |
| aadA5-02       | 44B    |    | 32.64 | 79.79      | 1.92                   |
| aadA9-01       | 44B    |    | 33.94 | 84.01      | 1.82                   |
| aadA9-02       | 44B    |    |       |            | NoAmplification        |
| aadD           | 44B    |    |       |            | NoAmplification        |
| aadE           | 44B    |    |       |            | NoAmplification        |
| acrA-01        | 44B    |    | 29.57 | 83.49      | 1.93                   |
| acrA-02        | 44B    |    | 33.6  | 84.71      | 1.91 MultipleMeltPeaks |
| acrA-03        | 44B    |    | 38.71 | 87.99      | 1.63                   |
| acrA-04        | 44B    |    | 30.14 | 85.98      | 1.87                   |
| acrA-05        | 44B    |    | 29.58 | 86.79      | 1.94                   |
| acrB-01        | 44B    |    | 33.51 | 76.47      | 1.78 MultipleMeltPeaks |
| acrF           | 44B    |    | 33.85 | 82.14      | 1.89                   |
| acrR-01        | 44B    |    | 32.4  | 89.52      | 1.81                   |
| acrR-02        | 44B    |    |       |            | NoAmplification        |
| Actin          | 44B    |    | 26.04 | 87.21      | 1.92                   |
| adeA           | 44B    |    |       |            | CurveFitFailed         |
| ampC-01        | 44B    |    | 32.69 | 80.24      | 1.89 MultipleMeltPeaks |
| ampC-02        | 44B    |    | 36.95 | 89.21      | 1.85                   |
| ampC-04        | 44B    |    |       |            | NoAmplification        |
| ampC-05        | 44B    |    |       |            | NoAmplification        |
| ampC-06        | 44B    |    |       |            | NoAmplification        |
| ampC-07        | 44B    |    |       |            | CurveFitFailed         |
| ampC-09        | 44B    |    |       |            | NoAmplification        |
| ampC/blaDH     | 44B    |    | 39.31 | 64.83      | 1.6 MultipleMeltPeaks  |

|                          |     |       |       |      |                   |
|--------------------------|-----|-------|-------|------|-------------------|
| aph                      | 44B |       |       |      | NoAmplification   |
| aph(2')-Id-01            | 44B |       |       |      | NoAmplification   |
| aph(2')-Id-02            | 44B |       |       |      | NoAmplification   |
| aph6ia                   | 44B | 30.99 | 77.97 | 2.01 |                   |
| aphA1(aka k <sub>z</sub> | 44B |       |       |      | NoAmplification   |
| bacA-01                  | 44B |       |       |      | NoAmplification   |
| bacA-02                  | 44B | 39.81 | 79.69 | 1.72 |                   |
| BETA-globin              | 44B | 25.99 | 84.14 | 2    |                   |
| bla-ACC-1                | 44B |       |       |      | NoAmplification   |
| bla-L1                   | 44B | 32.26 | 81.96 | 1.91 |                   |
| bla1                     | 44B |       |       |      | NoAmplification   |
| blaCMY                   | 44B | 34.5  | 80.41 | 1.89 |                   |
| blaCMY2-01               | 44B | 40.72 | 75.25 | 1.85 |                   |
| blaCMY2-02               | 44B | 33.97 | 82.68 | 1.88 |                   |
| blaCTX-M-01              | 44B | 29.35 | 87.58 | 2    |                   |
| blaCTX-M-02              | 44B |       |       |      | NoAmplification   |
| blaCTX-M-03              | 44B | 38.6  | 83.79 | 1.85 |                   |
| blaCTX-M-04              | 44B | 35.62 | 82.5  | 1.84 |                   |
| blaCTX-M-05              | 44B |       |       |      | NoAmplification   |
| blaCTX-M-06              | 44B |       |       |      | NoAmplification   |
| blaGES                   | 44B |       |       |      | NoAmplification   |
| blaIMP-01                | 44B |       |       |      | NoAmplification   |
| blaIMP-02                | 44B |       |       |      | NoAmplification   |
| blaMOX/blaC              | 44B |       |       |      | NoAmplification   |
| blaOCH                   | 44B |       |       |      | NoAmplification   |
| blaOKP                   | 44B |       |       |      | NoAmplification   |
| blaOXA1/blaC             | 44B |       |       |      | NoAmplification   |
| blaOXA10-01              | 44B |       |       |      | NoAmplification   |
| blaOXA10-02              | 44B |       |       |      | CurveFitFailed    |
| blaOXY                   | 44B |       |       |      | NoAmplification   |
| blaPAO                   | 44B | 38.53 | 61.88 | 1.91 | MultipleMeltPeaks |
| blaPER                   | 44B |       |       |      | NoAmplification   |
| blaPSE                   | 44B |       |       |      | NoAmplification   |
| blaROB                   | 44B |       |       |      | NoAmplification   |
| blaSFO                   | 44B | 34.62 | 89.27 | 1.89 |                   |
| blaSHV-01                | 44B |       |       |      | NoAmplification   |
| blaSHV-02                | 44B |       |       |      | NoAmplification   |
| blaTEM                   | 44B | 27.37 | 79.58 | 2.01 |                   |
| blaTLA                   | 44B |       |       |      | NoAmplification   |
| blaVEB                   | 44B |       |       |      | NoAmplification   |
| blaVIM                   | 44B | 39.8  | 88.89 | 1.69 |                   |
| blaZ                     | 44B | 25.19 | 73.67 | 1.88 |                   |
| carB                     | 44B | 39.67 | 90.65 | 1.67 | MultipleMeltPeaks |
| catA1                    | 44B |       |       |      | NoAmplification   |
| catB3                    | 44B |       |       |      | CurveFitFailed    |
| catB8                    | 44B |       |       |      | CurveFitFailed    |

|            |     |       |       |      |                              |
|------------|-----|-------|-------|------|------------------------------|
| ceoA       | 44B | 34.87 | 92.32 | 1.78 |                              |
| cepA       | 44B |       |       |      | NoAmplification              |
| cfiA       | 44B |       |       |      | NoAmplification              |
| cfr        | 44B |       |       |      | NoAmplification              |
| cfxA       | 44B | 19.31 | 77.59 | 1.91 |                              |
| cmeA       | 44B |       |       |      | NoAmplification              |
| cmlA1-01   | 44B |       |       |      | NoAmplification              |
| cmlA1-02   | 44B | 36.72 | 88.69 | 1.81 | MultipleMeltPeaks            |
| cmr        | 44B |       |       |      | NoAmplification              |
| cmx(A)     | 44B | 32.16 | 87.33 | 1.95 |                              |
| cphA-01    | 44B |       |       |      | NoAmplification              |
| cphA-02    | 44B |       |       |      | CurveFitFailed               |
| dfrA1      | 44B |       |       |      | NoAmplification              |
| dfrA12     | 44B |       |       |      | NoAmplification              |
| emrD       | 44B | 39.07 | 90.72 | 1.59 |                              |
| ereA       | 44B |       |       |      | NoAmplification              |
| ereB       | 44B |       |       |      | CurveFitFailed               |
| erm(34)    | 44B |       |       |      | NoAmplification              |
| erm(35)    | 44B |       |       |      | NoAmplification              |
| erm(36)    | 44B |       |       |      | NoAmplification              |
| ermA       | 44B |       |       |      | NoAmplification              |
| ermA/ermTR | 44B |       |       |      | NoAmplification              |
| ermB       | 44B | 18.49 | 75.14 | 2.05 |                              |
| ermC       | 44B |       |       |      | NoAmplification              |
| ermF       | 44B | 22.85 | 74.69 | 1.98 |                              |
| ermJ/ermD  | 44B | 39.37 | 72.3  | 1.93 |                              |
| ermK-01    | 44B |       |       |      | NoAmplification              |
| ermK-02    | 44B | 36.45 | 90.38 | 1.81 | MultipleMeltPeaks            |
| ermT-01    | 44B |       |       |      | NoAmplification              |
| ermT-02    | 44B |       |       |      | NoAmplification              |
| ermX       | 44B | 28.34 | 83.64 | 1.86 |                              |
| ermY       | 44B |       |       |      | NoAmplification              |
| fabK       | 44B | 18.78 | 78.78 | 2.15 |                              |
| floR       | 44B |       |       |      | NoAmplification              |
| folA       | 44B |       |       |      | NoAmplification              |
| fosB       | 44B |       |       |      | LowEfficiency, CtIsSmall, S: |
| fosX       | 44B |       |       |      | NoAmplification              |
| fox5       | 44B | 31.93 | 84.03 | 1.89 |                              |
| imiR       | 44B |       |       |      | NoAmplification              |
| ImrA-01    | 44B |       |       |      | NoAmplification              |
| intl       | 44B | 35.79 | 84.41 | 1.8  | MultipleMeltPeaks            |
| intl1      | 44B | 23.5  | 89.7  | 1.94 | MultipleMeltPeaks            |
| IS613      | 44B | 18.89 | 79.93 | 2.04 |                              |
| lnuA-01    | 44B |       |       |      | NoAmplification              |
| lnuB-01    | 44B |       |       |      | NoAmplification              |
| lnuB-02    | 44B |       |       |      | NoAmplification              |

|                |     |       |       |      |                            |
|----------------|-----|-------|-------|------|----------------------------|
| lnuC           | 44B |       |       |      | CurveFitFailed             |
| marR-01        | 44B | 40.46 | 61.6  | 1.55 | MultipleMeltPeaks          |
| matA/mel       | 44B | 17.47 | 77.81 | 2.05 |                            |
| mdet1          | 44B |       |       |      | NoAmplification            |
| mdtA           | 44B |       |       |      | NoAmplification            |
| mdtE/yhiU      | 44B | 33.15 | 90.81 | 1.82 |                            |
| mecA           | 44B |       |       |      | NoAmplification            |
| mefA           | 44B | 16.82 | 80.62 | 1.98 |                            |
| mepA           | 44B | 33.34 | 90.34 | 1.76 |                            |
| mexA           | 44B |       |       |      | NoAmplification            |
| mexD           | 44B | 35.87 | 77.61 | 1.98 |                            |
| mexE           | 44B | 29.08 | 87.26 | 1.91 | MultipleMeltPeaks          |
| mexF           | 44B | 29.59 | 86.32 | 1.75 | MultipleMeltPeaks          |
| mphA-01        | 44B | 28.86 | 88.79 | 1.93 |                            |
| mphA-02        | 44B | 32.75 | 76.98 | 1.61 | MultipleMeltPeaks          |
| mphB           | 44B |       |       |      | BadR2, LowEfficiency, Curv |
| mphC           | 44B |       |       |      | NoAmplification            |
| msrA-01        | 44B | 34.58 | 72.85 | 2.02 |                            |
| msrC-01        | 44B |       |       |      | NoAmplification            |
| mtrC-01        | 44B | 33.23 | 83.09 | 1.94 | MultipleMeltPeaks          |
| mtrC-02        | 44B |       |       |      | NoAmplification            |
| mtrD-02        | 44B | 30.79 | 81.58 | 1.99 |                            |
| mtrD-03        | 44B | 32.22 | 82.77 | 1.77 |                            |
| NDM1           | 44B |       |       |      | CurveFitFailed             |
| nimE           | 44B | 35.4  | 75.39 | 1.96 |                            |
| nisB           | 44B |       |       |      | NoAmplification            |
| oleC           | 44B | 33.34 | 89.5  | 1.88 |                            |
| oprD           | 44B | 31.22 | 86.91 | 1.89 |                            |
| oprJ           | 44B | 31.78 | 78.08 | 1.94 | MultipleMeltPeaks          |
| pbp            | 44B |       |       |      | NoAmplification            |
| pbp2x          | 44B | 30.11 | 75.44 | 1.8  |                            |
| Pbp5           | 44B |       |       |      | NoAmplification            |
| penA           | 44B |       |       |      | NoAmplification            |
| pikR1          | 44B | 37.73 | 89.51 | 1.82 | MultipleMeltPeaks          |
| pikR2          | 44B | 31.15 | 91.45 | 1.81 |                            |
| pmrA           | 44B | 19.35 | 79.3  | 2.05 |                            |
| pncA           | 44B | 28.94 | 86.44 | 1.9  |                            |
| putative multi | 44B | 35.24 | 76.92 | 1.91 | MultipleMeltPeaks          |
| qac            | 44B | 38.94 | 71.87 | 1.9  |                            |
| qacA           | 44B | 27.31 | 81.05 | 2.01 |                            |
| qacA/qacB      | 44B |       |       |      | NoAmplification            |
| qacEdelta1-0   | 44B |       |       |      | NoAmplification            |
| qacEdelta1-0   | 44B | 33.24 | 91    | 1.88 |                            |
| qacH-01        | 44B | 38.13 | 76.1  | 1.74 |                            |
| qacH-02        | 44B |       |       |      | NoAmplification            |
| qnrA           | 44B |       |       |      | CurveFitFailed             |

|              |     |       |       |      |                   |
|--------------|-----|-------|-------|------|-------------------|
| rarD-02      | 44B |       |       |      | NoAmplification   |
| sat4         | 44B |       |       |      | NoAmplification   |
| sdeB         | 44B |       |       |      | NoAmplification   |
| spcN-01      | 44B |       |       |      | NoAmplification   |
| speA         | 44B |       |       |      | NoAmplification   |
| str          | 44B |       |       |      | NoAmplification   |
| strA         | 44B |       |       |      | NoAmplification   |
| strB         | 44B |       |       |      | NoAmplification   |
| sul1         | 44B |       |       |      | NoAmplification   |
| sul2         | 44B | 37.58 | 82.84 | 1.8  |                   |
| sulA/foIP-01 | 44B | 18.05 | 80.84 | 1.99 |                   |
| sulA/foIP-03 | 44B | 18    | 83.04 | 2.01 |                   |
| tet(32)      | 44B | 23.91 | 81.31 | 1.98 |                   |
| tet(34)      | 44B | 32.07 | 75.81 | 2.01 |                   |
| tet(35)      | 44B |       |       |      | NoAmplification   |
| tet(36)-A    | 44B |       |       |      | NoAmplification   |
| tet(36)-B    | 44B |       |       |      | NoAmplification   |
| tet(37)      | 44B | 21.36 | 76.66 | 1.97 |                   |
| tetA-01      | 44B |       |       |      | NoAmplification   |
| tetA-02      | 44B | 34.56 | 84.85 | 1.86 |                   |
| tetB-01      | 44B | 28.34 | 79.65 | 1.93 |                   |
| tetB-02      | 44B | 27.95 | 79.65 | 1.98 |                   |
| tetC-01      | 44B | 27.54 | 75.24 | 1.96 |                   |
| tetC-02      | 44B | 26.77 | 76.19 | 2.05 |                   |
| tetD-01      | 44B |       |       |      | NoAmplification   |
| tetD-02      | 44B |       |       |      | NoAmplification   |
| tetE         | 44B |       |       |      | CurveFitFailed    |
| tetG-01      | 44B | 34.5  | 89.68 | 1.89 |                   |
| tetG-02      | 44B | 37.06 | 88.69 | 1.74 | MultipleMeltPeaks |
| tetH         | 44B |       |       |      | NoAmplification   |
| tetJ         | 44B |       |       |      | NoAmplification   |
| tetK         | 44B |       |       |      | NoAmplification   |
| tetL-01      | 44B |       |       |      | NoAmplification   |
| tetL-02      | 44B |       |       |      | CurveFitFailed    |
| tetM-01      | 44B | 16.64 | 76.22 | 2    |                   |
| tetM-02      | 44B | 16.75 | 77.59 | 2.05 |                   |
| tetO-01      | 44B | 18.33 | 77.08 | 2.04 |                   |
| tetPA        | 44B |       |       |      | NoAmplification   |
| tetPB-01     | 44B |       |       |      | NoAmplification   |
| tetPB-02     | 44B | 32.8  | 85.07 | 2.01 |                   |
| tetPB-03     | 44B |       |       |      | NoAmplification   |
| tetPB-05     | 44B |       |       |      | NoAmplification   |
| tetQ         | 44B | 22.91 | 76.39 | 2.02 |                   |
| tetR-02      | 44B | 32.17 | 86.05 | 1.89 |                   |
| tetR-03      | 44B | 28.3  | 76.37 | 1.97 |                   |
| tetS         | 44B | 37.8  | 86.15 | 1.81 | MultipleMeltPeaks |

|             |     |       |       |      |                   |
|-------------|-----|-------|-------|------|-------------------|
| tetT        | 44B |       |       |      | NoAmplification   |
| tetU-01     | 44B |       |       |      | NoAmplification   |
| tetV        | 44B | 43.63 | 61.98 | 1.68 | MultipleMeltPeaks |
| tetW-01     | 44B | 19.93 | 82.05 | 1.96 |                   |
| tetX        | 44B |       |       |      | NoAmplification   |
| tnpA-01     | 44B |       |       |      | NoAmplification   |
| tnpA-02     | 44B |       |       |      | NoAmplification   |
| tnpA-03     | 44B | 27.33 | 77.69 | 1.98 |                   |
| tnpA-04     | 44B | 29.15 | 82.42 | 1.93 |                   |
| tnpA-05     | 44B | 31.27 | 80.7  | 1.91 |                   |
| tnpA-07     | 44B |       |       |      | NoAmplification   |
| tolC-01     | 44B | 40.82 | 63.64 | 1.62 | MultipleMeltPeaks |
| tolC-02     | 44B | 30.76 | 85.27 | 1.97 |                   |
| tolC-03     | 44B | 35.97 | 87.7  | 1.85 |                   |
| Tp614       | 44B | 40.55 | 61.22 | 1.4  | MultipleMeltPeaks |
| ttgA        | 44B | 28.39 | 84.38 | 1.9  |                   |
| ttgB        | 44B |       |       |      | NoAmplification   |
| vanA        | 44B |       |       |      | NoAmplification   |
| vanB-01     | 44B | 32.96 | 81.6  | 1.92 |                   |
| vanC-01     | 44B |       |       |      | CurveFitFailed    |
| vanC-02     | 44B |       |       |      | NoAmplification   |
| vanC-03     | 44B | 29.9  | 91.93 | 1.95 |                   |
| vanC1       | 44B |       |       |      | NoAmplification   |
| vanC2/vanC3 | 44B | 33.6  | 81.84 | 2.08 |                   |
| vanG        | 44B |       |       |      | NoAmplification   |
| vanHB       | 44B | 35.97 | 82.77 | 1.85 |                   |
| vanHD       | 44B |       |       |      | NoAmplification   |
| vanRA-01    | 44B |       |       |      | NoAmplification   |
| vanRA-02    | 44B |       |       |      | NoAmplification   |
| vanRB       | 44B | 33.77 | 86.07 | 2.03 |                   |
| vanRC       | 44B |       |       |      | NoAmplification   |
| vanRC4      | 44B |       |       |      | NoAmplification   |
| vanRD       | 44B |       |       |      | NoAmplification   |
| vanSA       | 44B |       |       |      | NoAmplification   |
| vanSB       | 44B | 33.33 | 73.96 | 2.06 |                   |
| vanSC-01    | 44B |       |       |      | NoAmplification   |
| vanSC-02    | 44B |       |       |      | NoAmplification   |
| vanTC-01    | 44B |       |       |      | NoAmplification   |
| vanTC-02    | 44B |       |       |      | CurveFitFailed    |
| vanTE       | 44B |       |       |      | NoAmplification   |
| vanTG       | 44B |       |       |      | NoAmplification   |
| vanWB       | 44B |       |       |      | NoAmplification   |
| vanWG       | 44B | 39.13 | 73.96 | 1.87 |                   |
| vanXA       | 44B |       |       |      | CurveFitFailed    |
| vanXB       | 44B |       |       |      | NoAmplification   |
| vanXD       | 44B | 34.9  | 74.33 | 1.96 |                   |

|              |     |       |       |      |                   |
|--------------|-----|-------|-------|------|-------------------|
| vanYB        | 44B |       |       |      | NoAmplification   |
| vanYD-01     | 44B | 40.24 | 89.05 | 1.56 | MultipleMeltPeaks |
| vanYD-02     | 44B |       |       |      | NoAmplification   |
| vatB-01      | 44B |       |       |      | NoAmplification   |
| vatB-02      | 44B | 38.01 | 75.1  | 1.83 |                   |
| vatC-01      | 44B |       |       |      | NoAmplification   |
| vatC-02      | 44B |       |       |      | CurveFitFailed    |
| vatE-01      | 44B | 31.17 | 76.06 | 2.1  |                   |
| vatE-02      | 44B |       |       |      | NoAmplification   |
| vgaA-01      | 44B |       |       |      | NoAmplification   |
| vgaA-02      | 44B | 35.23 | 71.51 | 2.04 |                   |
| vgb-01       | 44B |       |       |      | NoAmplification   |
| vgbB-01      | 44B |       |       |      | NoAmplification   |
| vgbB-02      | 44B |       |       |      | NoAmplification   |
| yceE/mdtG-0  | 44B |       |       |      | NoAmplification   |
| yceE/mdtG-0  | 44B |       |       |      | NoAmplification   |
| yceL/mdtH-0  | 44B | 26.54 | 76.47 | 1.97 | MultipleMeltPeaks |
| yceL/mdtH-0  | 44B |       |       |      | NoAmplification   |
| yceL/mdtH-0  | 44B | 33.65 | 87.34 | 1.71 |                   |
| yidY/mdtL-01 | 44B | 34.98 | 80.92 | 1.89 | MultipleMeltPeaks |
| yidY/mdtL-02 | 44B | 36.69 | 81.84 | 1.84 |                   |































| Assay          | Sample | Ct | Tm    | Efficiency | flag                          |
|----------------|--------|----|-------|------------|-------------------------------|
| 16S rRNA       | 44C    |    | 14.24 | 82.38      | 1.92                          |
| aac            | 44C    |    | 34.41 | 88.35      | 1.84                          |
| aac(6')-Ib(akz | 44C    |    | 40.63 | 62.02      | 1.31 BadR2, MultipleMeltPeaks |
| aac(6')-Ib(akz | 44C    |    | 36.09 | 88.59      | 1.8 MultipleMeltPeaks         |
| aac(6')-Ib(akz | 44C    |    | 38.7  | 77.54      | 1.74 MultipleMeltPeaks        |
| aac(6')-II     | 44C    |    | 33.8  | 77.44      | 1.89                          |
| aac(6')I1      | 44C    |    | 36.28 | 88.24      | 1.74 MultipleMeltPeaks        |
| aacA/aphD      | 44C    |    |       |            | NoAmplification               |
| aacC           | 44C    |    | 31.22 | 90         | 1.84                          |
| aacC1          | 44C    |    |       |            | NoAmplification               |
| aacC2          | 44C    |    |       |            | NoAmplification               |
| aacC4          | 44C    |    | 33.17 | 92.67      | 1.71                          |
| aadA-01        | 44C    |    |       |            | NoAmplification               |
| aadA-02        | 44C    |    |       |            | NoAmplification               |
| aadA-1-01      | 44C    |    |       |            | NoAmplification               |
| aadA-1-02      | 44C    |    |       |            | NoAmplification               |
| aadA1          | 44C    |    |       |            | NoAmplification               |
| aadA2-01       | 44C    |    |       |            | NoAmplification               |
| aadA2-02       | 44C    |    |       |            | NoAmplification               |
| aadA2-03       | 44C    |    |       |            | NoAmplification               |
| aadA5-01       | 44C    |    |       |            | NoAmplification               |
| aadA5-02       | 44C    |    |       |            | NoAmplification               |
| aadA9-01       | 44C    |    |       |            | NoAmplification               |
| aadA9-02       | 44C    |    |       |            | NoAmplification               |
| aadD           | 44C    |    |       |            | NoAmplification               |
| aadE           | 44C    |    |       |            | NoAmplification               |
| acrA-01        | 44C    |    | 31.09 | 83.43      | 1.93                          |
| acrA-02        | 44C    |    | 32.3  | 90.31      | 1.87                          |
| acrA-03        | 44C    |    | 37.31 | 87.95      | 1.64 MultipleMeltPeaks        |
| acrA-04        | 44C    |    | 32.62 | 89.03      | 1.93 MultipleMeltPeaks        |
| acrA-05        | 44C    |    | 31.1  | 86.4       | 1.92                          |
| acrB-01        | 44C    |    | 34.22 | 89.96      | 1.79                          |
| acrF           | 44C    |    | 38.47 | 81.21      | 1.86 MultipleMeltPeaks        |
| acrR-01        | 44C    |    | 33.64 | 89.6       | 1.9 MultipleMeltPeaks         |
| acrR-02        | 44C    |    |       |            | CurveFitFailed                |
| Actin          | 44C    |    | 26.36 | 87.22      | 1.92 MultipleMeltPeaks        |
| adeA           | 44C    |    | 37.16 | 85.1       | 1.86                          |
| ampC-01        | 44C    |    | 28.19 | 90.04      | 1.99                          |
| ampC-02        | 44C    |    | 38.49 | 61.54      | 2.04 MultipleMeltPeaks        |
| ampC-04        | 44C    |    | 31.34 | 83.09      | 1.86                          |
| ampC-05        | 44C    |    |       |            | NoAmplification               |
| ampC-06        | 44C    |    |       |            | CurveFitFailed                |
| ampC-07        | 44C    |    | 40.98 | 84.69      | 1.82                          |
| ampC-09        | 44C    |    | 36.53 | 85.89      | 1.7                           |
| ampC/blaDH     | 44C    |    | 35.29 | 89.84      | 1.65 MultipleMeltPeaks        |

|                          |     |       |       |      |                 |
|--------------------------|-----|-------|-------|------|-----------------|
| aph                      | 44C |       |       |      | NoAmplification |
| aph(2')-Id-01            | 44C |       |       |      | NoAmplification |
| aph(2')-Id-02            | 44C |       |       |      | NoAmplification |
| aph6ia                   | 44C | 30.6  | 78.21 | 1.98 |                 |
| aphA1(aka k <sub>z</sub> | 44C |       |       |      | NoAmplification |
| bacA-01                  | 44C |       |       |      | CurveFitFailed  |
| bacA-02                  | 44C |       |       |      | CurveFitFailed  |
| BETA-globin              | 44C | 27.59 | 84.22 | 1.96 |                 |
| bla-ACC-1                | 44C |       |       |      | NoAmplification |
| bla-L1                   | 44C | 39.44 | 87.55 | 1.67 |                 |
| bla1                     | 44C |       |       |      | NoAmplification |
| blaCMY                   | 44C | 35.39 | 80.4  | 1.89 |                 |
| blaCMY2-01               | 44C |       |       |      | NoAmplification |
| blaCMY2-02               | 44C | 34.46 | 82.65 | 1.86 |                 |
| blaCTX-M-01              | 44C | 27.7  | 87.68 | 2.02 |                 |
| blaCTX-M-02              | 44C |       |       |      | CurveFitFailed  |
| blaCTX-M-03              | 44C |       |       |      | CurveFitFailed  |
| blaCTX-M-04              | 44C | 30.04 | 78.87 | 1.91 |                 |
| blaCTX-M-05              | 44C |       |       |      | NoAmplification |
| blaCTX-M-06              | 44C |       |       |      | NoAmplification |
| blaGES                   | 44C |       |       |      | NoAmplification |
| blaIMP-01                | 44C |       |       |      | NoAmplification |
| blaIMP-02                | 44C |       |       |      | NoAmplification |
| blaMOX/blaC              | 44C |       |       |      | NoAmplification |
| blaOCH                   | 44C |       |       |      | NoAmplification |
| blaOKP                   | 44C |       |       |      | NoAmplification |
| blaOXA1/blaC             | 44C |       |       |      | NoAmplification |
| blaOXA10-01              | 44C |       |       |      | NoAmplification |
| blaOXA10-02              | 44C |       |       |      | NoAmplification |
| blaOXY                   | 44C |       |       |      | CurveFitFailed  |
| blaPAO                   | 44C |       |       |      | NoAmplification |
| blaPER                   | 44C |       |       |      | NoAmplification |
| blaPSE                   | 44C |       |       |      | NoAmplification |
| blaROB                   | 44C |       |       |      | NoAmplification |
| blaSFO                   | 44C | 31.75 | 80.87 | 1.84 |                 |
| blaSHV-01                | 44C |       |       |      | NoAmplification |
| blaSHV-02                | 44C |       |       |      | NoAmplification |
| blaTEM                   | 44C |       |       |      | NoAmplification |
| blaTLA                   | 44C |       |       |      | NoAmplification |
| blaVEB                   | 44C |       |       |      | NoAmplification |
| blaVIM                   | 44C | 34.57 | 88.79 | 1.84 |                 |
| blaZ                     | 44C |       |       |      | NoAmplification |
| carB                     | 44C |       |       |      | NoAmplification |
| catA1                    | 44C |       |       |      | NoAmplification |
| catB3                    | 44C |       |       |      | NoAmplification |
| catB8                    | 44C |       |       |      | NoAmplification |

|            |     |       |       |      |                              |
|------------|-----|-------|-------|------|------------------------------|
| ceoA       | 44C | 35.11 | 88.17 | 1.83 |                              |
| cepA       | 44C |       |       |      | NoAmplification              |
| cfiA       | 44C |       |       |      | NoAmplification              |
| cfr        | 44C | 35.37 | 81.43 | 1.85 |                              |
| cfxA       | 44C | 21.45 | 77.66 | 2.02 |                              |
| cmeA       | 44C |       |       |      | NoAmplification              |
| cmlA1-01   | 44C | 38.7  | 87.58 | 1.74 |                              |
| cmlA1-02   | 44C | 37.84 | 89.02 | 1.76 | MultipleMeltPeaks            |
| cmr        | 44C |       |       |      | NoAmplification              |
| cmx(A)     | 44C | 36.23 | 80.39 | 1.75 |                              |
| cphA-01    | 44C |       |       |      | NoAmplification              |
| cphA-02    | 44C |       |       |      | CurveFitFailed               |
| dfrA1      | 44C |       |       |      | NoAmplification              |
| dfrA12     | 44C |       |       |      | NoAmplification              |
| emrD       | 44C | 31.28 | 90.73 | 1.8  |                              |
| ereA       | 44C |       |       |      | NoAmplification              |
| ereB       | 44C |       |       |      | CurveFitFailed               |
| erm(34)    | 44C | 40.88 | 62.15 | 1.69 | MultipleMeltPeaks            |
| erm(35)    | 44C |       |       |      | NoAmplification              |
| erm(36)    | 44C | 36.18 | 89.16 | 1.85 | MultipleMeltPeaks            |
| ermA       | 44C |       |       |      | NoAmplification              |
| ermA/ermTR | 44C |       |       |      | NoAmplification              |
| ermB       | 44C | 27.1  | 75.11 | 2.09 |                              |
| ermC       | 44C |       |       |      | NoAmplification              |
| ermF       | 44C | 26.42 | 74.69 | 1.98 |                              |
| ermJ/ermD  | 44C |       |       |      | NoAmplification              |
| ermK-01    | 44C |       |       |      | NoAmplification              |
| ermK-02    | 44C |       |       |      | NoAmplification              |
| ermT-01    | 44C |       |       |      | NoAmplification              |
| ermT-02    | 44C |       |       |      | NoAmplification              |
| ermX       | 44C |       |       |      | NoAmplification              |
| ermY       | 44C |       |       |      | NoAmplification              |
| fabK       | 44C | 24.84 | 79.26 | 2.13 |                              |
| floR       | 44C |       |       |      | NoAmplification              |
| folA       | 44C |       |       |      | NoAmplification              |
| fosB       | 44C |       |       |      | LowEfficiency, CtIsSmall, S: |
| fosX       | 44C |       |       |      | NoAmplification              |
| fox5       | 44C | 28.55 | 86.29 | 1.89 |                              |
| imiR       | 44C |       |       |      | NoAmplification              |
| ImrA-01    | 44C |       |       |      | NoAmplification              |
| intl       | 44C | 36.01 | 90.74 | 1.78 |                              |
| intl1      | 44C | 23.4  | 88.4  | 1.97 |                              |
| IS613      | 44C | 20.75 | 79.95 | 2.03 |                              |
| lnuA-01    | 44C |       |       |      | NoAmplification              |
| lnuB-01    | 44C |       |       |      | NoAmplification              |
| lnuB-02    | 44C |       |       |      | NoAmplification              |

|                |     |       |       |      |                   |
|----------------|-----|-------|-------|------|-------------------|
| lnuC           | 44C |       |       |      | NoAmplification   |
| marR-01        | 44C | 38.69 | 86.32 | 1.79 | MultipleMeltPeaks |
| matA/mel       | 44C | 18.38 | 77.88 | 2.02 |                   |
| mdetI1         | 44C |       |       |      | NoAmplification   |
| mdtA           | 44C | 37.48 | 73.09 | 1.93 |                   |
| mdtE/yhiU      | 44C | 32.16 | 90.73 | 1.89 |                   |
| mecA           | 44C |       |       |      | NoAmplification   |
| mefA           | 44C | 17.93 | 80.61 | 1.96 | MultipleMeltPeaks |
| mepA           | 44C | 28.39 | 90.64 | 1.97 |                   |
| mexA           | 44C |       |       |      | CurveFitFailed    |
| mexD           | 44C | 38.76 | 79.69 | 1.97 |                   |
| mexE           | 44C | 36.24 | 87.39 | 1.81 | MultipleMeltPeaks |
| mexF           | 44C | 28.57 | 86.65 | 1.74 | MultipleMeltPeaks |
| mphA-01        | 44C | 29.29 | 89.16 | 1.92 | MultipleMeltPeaks |
| mphA-02        | 44C | 28.97 | 88.18 | 1.96 |                   |
| mphB           | 44C |       |       |      | CurveFitFailed    |
| mphC           | 44C |       |       |      | NoAmplification   |
| msrA-01        | 44C | 36.31 | 72.39 | 1.91 |                   |
| msrC-01        | 44C |       |       |      | NoAmplification   |
| mtrC-01        | 44C | 35.05 | 85.94 | 1.9  |                   |
| mtrC-02        | 44C |       |       |      | NoAmplification   |
| mtrD-02        | 44C | 33.15 | 80.89 | 1.9  | MultipleMeltPeaks |
| mtrD-03        | 44C | 32.36 | 82.27 | 1.9  |                   |
| NDM1           | 44C |       |       |      | NoAmplification   |
| nimE           | 44C |       |       |      | NoAmplification   |
| nisB           | 44C |       |       |      | NoAmplification   |
| oleC           | 44C | 31.42 | 89.33 | 1.93 | MultipleMeltPeaks |
| oprD           | 44C | 30.42 | 89.26 | 1.98 |                   |
| oprJ           | 44C | 29.76 | 91.87 | 1.83 |                   |
| pbp            | 44C |       |       |      | NoAmplification   |
| pbp2x          | 44C | 28.97 | 75.63 | 1.98 |                   |
| Pbp5           | 44C |       |       |      | NoAmplification   |
| penA           | 44C |       |       |      | NoAmplification   |
| pikR1          | 44C | 33.38 | 89.55 | 1.92 |                   |
| pikR2          | 44C | 30.95 | 91.45 | 2.02 |                   |
| pmrA           | 44C | 21.29 | 79.42 | 2.06 |                   |
| pncA           | 44C | 29.49 | 86.75 | 1.91 | MultipleMeltPeaks |
| putative multi | 44C |       |       |      | NoAmplification   |
| qac            | 44C |       |       |      | NoAmplification   |
| qacA           | 44C | 36.23 | 70.14 | 1.73 |                   |
| qacA/qacB      | 44C |       |       |      | NoAmplification   |
| qacEdelta1-0   | 44C |       |       |      | NoAmplification   |
| qacEdelta1-0   | 44C | 29.71 | 91.05 | 1.84 |                   |
| qacH-01        | 44C | 35.42 | 88.05 | 1.83 |                   |
| qacH-02        | 44C |       |       |      | NoAmplification   |
| qnrA           | 44C | 30.02 | 81.34 | 1.97 |                   |



|              |     |       |       |      |                   |
|--------------|-----|-------|-------|------|-------------------|
| rarD-02      | 44C |       |       |      | NoAmplification   |
| sat4         | 44C |       |       |      | NoAmplification   |
| sdeB         | 44C |       |       |      | NoAmplification   |
| spcN-01      | 44C |       |       |      | CurveFitFailed    |
| speA         | 44C |       |       |      | NoAmplification   |
| str          | 44C |       |       |      | NoAmplification   |
| strA         | 44C |       |       |      | NoAmplification   |
| strB         | 44C | 37    | 82.81 | 1.77 |                   |
| sul1         | 44C | 36.17 | 88.12 | 1.68 |                   |
| sul2         | 44C | 36.41 | 89.99 | 1.77 |                   |
| sulA/foIP-01 | 44C | 20.13 | 81.18 | 1.97 |                   |
| sulA/foIP-03 | 44C | 20.08 | 82.98 | 1.97 |                   |
| tet(32)      | 44C | 25.24 | 81.33 | 1.97 |                   |
| tet(34)      | 44C | 29.62 | 76.01 | 1.99 |                   |
| tet(35)      | 44C |       |       |      | NoAmplification   |
| tet(36)-A    | 44C |       |       |      | NoAmplification   |
| tet(36)-B    | 44C |       |       |      | NoAmplification   |
| tet(37)      | 44C | 23.46 | 76.3  | 1.97 | MultipleMeltPeaks |
| tetA-01      | 44C |       |       |      | NoAmplification   |
| tetA-02      | 44C | 32.12 | 87.23 | 1.88 |                   |
| tetB-01      | 44C |       |       |      | CurveFitFailed    |
| tetB-02      | 44C | 37.03 | 80.62 | 1.93 | MultipleMeltPeaks |
| tetC-01      | 44C |       |       |      | NoAmplification   |
| tetC-02      | 44C | 29.17 | 76.14 | 1.97 |                   |
| tetD-01      | 44C |       |       |      | NoAmplification   |
| tetD-02      | 44C | 32    | 77.58 | 2    |                   |
| tetE         | 44C | 38.01 | 62    | 2.12 | MultipleMeltPeaks |
| tetG-01      | 44C | 30.82 | 89.92 | 1.97 |                   |
| tetG-02      | 44C | 38.18 | 73.97 | 1.8  |                   |
| tetH         | 44C |       |       |      | NoAmplification   |
| tetJ         | 44C |       |       |      | NoAmplification   |
| tetK         | 44C |       |       |      | NoAmplification   |
| tetL-01      | 44C |       |       |      | NoAmplification   |
| tetL-02      | 44C | 37.72 | 87.48 | 1.63 |                   |
| tetM-01      | 44C | 18.56 | 76.22 | 1.99 |                   |
| tetM-02      | 44C | 18.72 | 77.66 | 2    |                   |
| tetO-01      | 44C | 18.62 | 77.07 | 2.02 |                   |
| tetPA        | 44C |       |       |      | NoAmplification   |
| tetPB-01     | 44C | 38.62 | 87.69 | 1.84 | MultipleMeltPeaks |
| tetPB-02     | 44C | 33.52 | 88.46 | 1.92 | MultipleMeltPeaks |
| tetPB-03     | 44C |       |       |      | NoAmplification   |
| tetPB-05     | 44C |       |       |      | NoAmplification   |
| tetQ         | 44C | 25.12 | 76.23 | 1.98 |                   |
| tetR-02      | 44C | 29.4  | 89.86 | 1.86 | MultipleMeltPeaks |
| tetR-03      | 44C |       |       |      | NoAmplification   |
| tetS         | 44C | 37.36 | 87.51 | 1.79 | MultipleMeltPeaks |

|             |     |       |       |      |                   |
|-------------|-----|-------|-------|------|-------------------|
| tetT        | 44C |       |       |      | NoAmplification   |
| tetU-01     | 44C |       |       |      | NoAmplification   |
| tetV        | 44C | 37.32 | 89.84 | 1.8  |                   |
| tetW-01     | 44C | 22.02 | 82.06 | 1.96 |                   |
| tetX        | 44C |       |       |      | NoAmplification   |
| tnpA-01     | 44C |       |       |      | NoAmplification   |
| tnpA-02     | 44C | 37.15 | 88.24 | 1.73 | MultipleMeltPeaks |
| tnpA-03     | 44C | 31.1  | 75.48 | 2.12 |                   |
| tnpA-04     | 44C | 28.25 | 82.45 | 1.92 |                   |
| tnpA-05     | 44C | 27.78 | 80.89 | 1.92 |                   |
| tnpA-07     | 44C |       |       |      | NoAmplification   |
| tolC-01     | 44C | 39.66 | 65.01 | 1.81 | MultipleMeltPeaks |
| tolC-02     | 44C | 25.01 | 77.31 | 1.96 | MultipleMeltPeaks |
| tolC-03     | 44C | 34.29 | 81.32 | 1.89 |                   |
| Tp614       | 44C |       |       |      | CurveFitFailed    |
| ttgA        | 44C | 37.9  | 75.98 | 1.86 |                   |
| ttgB        | 44C |       |       |      | NoAmplification   |
| vanA        | 44C |       |       |      | NoAmplification   |
| vanB-01     | 44C | 36.39 | 90.33 | 1.74 |                   |
| vanC-01     | 44C |       |       |      | NoAmplification   |
| vanC-02     | 44C |       |       |      | CurveFitFailed    |
| vanC-03     | 44C | 29.11 | 87.95 | 1.93 | MultipleMeltPeaks |
| vanC1       | 44C |       |       |      | NoAmplification   |
| vanC2/vanC3 | 44C | 43.33 | 77.73 | 2.48 | MultipleMeltPeaks |
| vanG        | 44C |       |       |      | NoAmplification   |
| vanHB       | 44C | 34.29 | 85.05 | 1.79 |                   |
| vanHD       | 44C |       |       |      | NoAmplification   |
| vanRA-01    | 44C |       |       |      | NoAmplification   |
| vanRA-02    | 44C |       |       |      | NoAmplification   |
| vanRB       | 44C | 31.04 | 75.71 | 2.14 | MultipleMeltPeaks |
| vanRC       | 44C |       |       |      | NoAmplification   |
| vanRC4      | 44C |       |       |      | NoAmplification   |
| vanRD       | 44C |       |       |      | NoAmplification   |
| vanSA       | 44C |       |       |      | NoAmplification   |
| vanSB       | 44C | 36.83 | 73.14 | 2.01 |                   |
| vanSC-01    | 44C | 36.87 | 77.58 | 1.89 |                   |
| vanSC-02    | 44C |       |       |      | NoAmplification   |
| vanTC-01    | 44C |       |       |      | NoAmplification   |
| vanTC-02    | 44C |       |       |      | CurveFitFailed    |
| vanTE       | 44C |       |       |      | NoAmplification   |
| vanTG       | 44C |       |       |      | NoAmplification   |
| vanWB       | 44C |       |       |      | NoAmplification   |
| vanWG       | 44C |       |       |      | CurveFitFailed    |
| vanXA       | 44C | 34.78 | 73.44 | 1.8  |                   |
| vanXB       | 44C |       |       |      | NoAmplification   |
| vanXD       | 44C | 33.14 | 74.9  | 2.01 |                   |

|              |     |       |       |      |                            |
|--------------|-----|-------|-------|------|----------------------------|
| vanYB        | 44C |       |       |      | NoAmplification            |
| vanYD-01     | 44C | 34.84 | 89.09 | 1.64 |                            |
| vanYD-02     | 44C |       |       |      | NoAmplification            |
| vatB-01      | 44C |       |       |      | NoAmplification            |
| vatB-02      | 44C |       |       |      | NoAmplification            |
| vatC-01      | 44C |       |       |      | CurveFitFailed             |
| vatC-02      | 44C |       |       |      | NoAmplification            |
| vatE-01      | 44C | 30.47 | 76.96 | 2.08 |                            |
| vatE-02      | 44C |       |       |      | NoAmplification            |
| vgaA-01      | 44C |       |       |      | NoAmplification            |
| vgaA-02      | 44C | 22.91 | 60.57 | 1.37 | SaturationBaselineRatiolsL |
| vgb-01       | 44C |       |       |      | NoAmplification            |
| vgbB-01      | 44C |       |       |      | NoAmplification            |
| vgbB-02      | 44C |       |       |      | NoAmplification            |
| yceE/mdtG-0  | 44C |       |       |      | NoAmplification            |
| yceE/mdtG-0  | 44C |       |       |      | NoAmplification            |
| yceL/mdtH-0  | 44C | 24.1  | 77.13 | 1.97 |                            |
| yceL/mdtH-0  | 44C |       |       |      | NoAmplification            |
| yceL/mdtH-0  | 44C | 33.56 | 87.25 | 1.74 |                            |
| yidY/mdtL-01 | 44C | 36.44 | 86.77 | 1.81 | MultipleMeltPeaks          |
| yidY/mdtL-02 | 44C |       |       |      | CurveFitFailed             |































| Assay          | Sample | Ct | Tm    | Efficiency | flag                         |
|----------------|--------|----|-------|------------|------------------------------|
| 16S rRNA       | 45A    |    | 15.44 | 81.73      | 2.01                         |
| aac            | 45A    |    | 32.04 | 82.31      | 1.46 MultipleMeltPeaks       |
| aac(6')-Ib(akz | 45A    |    |       |            | LowEfficiency, CtIsSmall, S: |
| aac(6')-Ib(akz | 45A    |    | 34.84 | 79.58      | 1.91                         |
| aac(6')-Ib(akz | 45A    |    | 32.4  | 87.33      | 1.98 MultipleMeltPeaks       |
| aac(6')-II     | 45A    |    | 38.25 | 88.85      | 1.68 MultipleMeltPeaks       |
| aac(6')I1      | 45A    |    |       |            | LowEfficiency, CtIsSmall, Ci |
| aacA/aphD      | 45A    |    |       |            | LowEfficiency, CtIsSmall, Ci |
| aacC           | 45A    |    | 36.92 | 84.73      | 1.74                         |
| aacC1          | 45A    |    |       |            | BadR2, LowEfficiency, CtIsS  |
| aacC2          | 45A    |    |       |            | NoAmplification              |
| aacC4          | 45A    |    | 31.39 | 88.72      | 1.85                         |
| aadA-01        | 45A    |    |       |            | LowEfficiency, CtIsSmall, Ci |
| aadA-02        | 45A    |    | 35.41 | 80.38      | 1.87                         |
| aadA-1-01      | 45A    |    | 37.15 | 81.33      | 1.9                          |
| aadA-1-02      | 45A    |    |       |            | LowEfficiency, CtIsSmall, Ci |
| aadA1          | 45A    |    | 31.9  | 84.79      | 2.1                          |
| aadA2-01       | 45A    |    |       |            | LowEfficiency, CtIsSmall, Ci |
| aadA2-02       | 45A    |    | 36.13 | 74.72      | 2.06                         |
| aadA2-03       | 45A    |    |       |            | LowEfficiency, CtIsSmall, Ci |
| aadA5-01       | 45A    |    |       |            | CurveFitFailed               |
| aadA5-02       | 45A    |    | 33.63 | 83.56      | 1.94                         |
| aadA9-01       | 45A    |    |       |            | CurveFitFailed               |
| aadA9-02       | 45A    |    |       |            | LowEfficiency, CtIsSmall, S: |
| aadD           | 45A    |    |       |            | NoAmplification              |
| aadE           | 45A    |    |       |            | LowEfficiency, CtIsSmall, Ci |
| acrA-01        | 45A    |    | 35.45 | 88.72      | 1.85                         |
| acrA-02        | 45A    |    | 37.06 | 89.59      | 1.82                         |
| acrA-03        | 45A    |    |       |            | BadR2, LowEfficiency, CtIsS  |
| acrA-04        | 45A    |    | 32.99 | 80.11      | 1.92                         |
| acrA-05        | 45A    |    | 31.34 | 89.49      | 1.96                         |
| acrB-01        | 45A    |    | 33.32 | 76.93      | 1.98                         |
| acrF           | 45A    |    | 34.32 | 85.15      | 1.93 MultipleMeltPeaks       |
| acrR-01        | 45A    |    | 33.29 | 89.16      | 1.76                         |
| acrR-02        | 45A    |    | 34.75 | 85.15      | 1.9                          |
| Actin          | 45A    |    | 20.68 | 87.11      | 1.95                         |
| adeA           | 45A    |    |       |            | NoAmplification              |
| ampC-01        | 45A    |    | 31.69 | 84.63      | 1.97                         |
| ampC-02        | 45A    |    | 30.33 | 81.84      | 1.91                         |
| ampC-04        | 45A    |    | 34.37 | 77.95      | 1.92                         |
| ampC-05        | 45A    |    |       |            | NoAmplification              |
| ampC-06        | 45A    |    | 37.34 | 84.02      | 1.87                         |
| ampC-07        | 45A    |    | 40.65 | 88.07      | 1.73 MultipleMeltPeaks       |
| ampC-09        | 45A    |    |       |            | LowEfficiency, CtIsSmall, S: |
| ampC/blaDH     | 45A    |    | 30.53 | 83.97      | 1.93                         |

|               |     |       |       |      |                              |
|---------------|-----|-------|-------|------|------------------------------|
| aph           | 45A |       |       |      | LowEfficiency, CtIsSmall, Ci |
| aph(2')-Id-01 | 45A |       |       |      | CurveFitFailed               |
| aph(2')-Id-02 | 45A |       |       |      | LowEfficiency, CtIsSmall, S: |
| aph6ia        | 45A | 41.02 | 75.98 | 1.82 |                              |
| aphA1(aka k:  | 45A |       |       |      | CurveFitFailed               |
| bacA-01       | 45A |       |       |      | LowEfficiency, CtIsSmall, Ci |
| bacA-02       | 45A | 32.87 | 88.72 | 1.85 |                              |
| BETA-globin   | 45A | 22.17 | 84.04 | 2.01 | MultipleMeltPeaks            |
| bla-ACC-1     | 45A | 34.33 | 86.16 | 1.84 |                              |
| bla-L1        | 45A | 30.79 | 85.8  | 1.97 |                              |
| bla1          | 45A |       |       |      | LowEfficiency, CtIsSmall, Ci |
| blaCMY        | 45A |       |       |      | LowEfficiency, CtIsSmall, Ci |
| blaCMY2-01    | 45A | 37.65 | 78.77 | 2.06 |                              |
| blaCMY2-02    | 45A | 30.25 | 85.46 | 1.99 |                              |
| blaCTX-M-01   | 45A |       |       |      | NoAmplification              |
| blaCTX-M-02   | 45A |       |       |      | LowEfficiency, CtIsSmall, Ci |
| blaCTX-M-03   | 45A |       |       |      | NoAmplification              |
| blaCTX-M-04   | 45A | 32.29 | 88.42 | 1.49 |                              |
| blaCTX-M-05   | 45A | 34.9  | 76.08 | 1.81 |                              |
| blaCTX-M-06   | 45A |       |       |      | NoAmplification              |
| blaGES        | 45A |       |       |      | NoAmplification              |
| blaIMP-01     | 45A |       |       |      | NoAmplification              |
| blaIMP-02     | 45A |       |       |      | LowEfficiency, CtIsSmall, Ci |
| blaMOX/blaC   | 45A | 32.59 | 83.25 | 1.91 |                              |
| blaOCH        | 45A |       |       |      | NoAmplification              |
| blaOKP        | 45A |       |       |      | NoAmplification              |
| blaOXA1/blaC  | 45A |       |       |      | LowEfficiency, CtIsSmall, Ci |
| blaOXA10-01   | 45A |       |       |      | LowEfficiency, CtIsSmall, S: |
| blaOXA10-02   | 45A |       |       |      | LowEfficiency, CtIsSmall, S: |
| blaOXY        | 45A | 39.08 | 89.07 | 1.64 |                              |
| blaPAO        | 45A |       |       |      | NoAmplification              |
| blaPER        | 45A |       |       |      | LowEfficiency, CtIsSmall, Ci |
| blaPSE        | 45A |       |       |      | NoAmplification              |
| blaROB        | 45A |       |       |      | NoAmplification              |
| blaSFO        | 45A | 30.9  | 82.76 | 1.95 | MultipleMeltPeaks            |
| blaSHV-01     | 45A |       |       |      | LowEfficiency, CtIsSmall, Ci |
| blaSHV-02     | 45A |       |       |      | LowEfficiency, CtIsSmall, S: |
| blaTEM        | 45A | 26.55 | 79.45 | 1.95 |                              |
| blaTLA        | 45A |       |       |      | LowEfficiency, CtIsSmall, Ci |
| blaVEB        | 45A |       |       |      | NoAmplification              |
| blaVIM        | 45A | 37.09 | 79.23 | 1.78 | MultipleMeltPeaks            |
| blaZ          | 45A |       |       |      | LowEfficiency, CtIsSmall, Ci |
| carB          | 45A | 37.99 | 85.44 | 1.79 |                              |
| catA1         | 45A |       |       |      | NoAmplification              |
| catB3         | 45A |       |       |      | LowEfficiency, CtIsSmall, Ci |
| catB8         | 45A | 31.3  | 82.78 | 1.97 |                              |

|            |     |       |       |      |                              |
|------------|-----|-------|-------|------|------------------------------|
| ceoA       | 45A | 27.04 | 82.33 | 1.95 |                              |
| cepA       | 45A |       |       |      | NoAmplification              |
| cfiA       | 45A | 33.73 | 84.62 | 1.85 |                              |
| cfr        | 45A |       |       |      | LowEfficiency, CtIsSmall, Ci |
| cfxA       | 45A | 21.21 | 77.49 | 1.87 |                              |
| cmeA       | 45A |       |       |      | LowEfficiency, CtIsSmall, Ci |
| cmlA1-01   | 45A |       |       |      | NoAmplification              |
| cmlA1-02   | 45A |       |       |      | CurveFitFailed               |
| cmr        | 45A |       |       |      | CurveFitFailed               |
| cmx(A)     | 45A | 28.94 | 86.67 | 1.97 | MultipleMeltPeaks            |
| cphA-01    | 45A | 37.49 | 81.92 | 1.74 | MultipleMeltPeaks            |
| cphA-02    | 45A |       |       |      | BadR2, LowEfficiency, CtIsS  |
| dfrA1      | 45A |       |       |      | NoAmplification              |
| dfrA12     | 45A |       |       |      | LowEfficiency, CtIsSmall, Ci |
| emrD       | 45A |       |       |      | NoAmplification              |
| ereA       | 45A | 35.44 | 82.44 | 1.89 |                              |
| ereB       | 45A | 36.73 | 76.64 | 1.8  |                              |
| erm(34)    | 45A |       |       |      | NoAmplification              |
| erm(35)    | 45A | 41.64 | 72.13 | 1.84 |                              |
| erm(36)    | 45A | 32.71 | 85.91 | 2.01 |                              |
| ermA       | 45A |       |       |      | LowEfficiency, CtIsSmall, Ci |
| ermA/ermTR | 45A |       |       |      | NoAmplification              |
| ermB       | 45A | 18.32 | 75.03 | 2.19 |                              |
| ermC       | 45A |       |       |      | LowEfficiency, CtIsSmall, Ci |
| ermF       | 45A | 21.72 | 74.63 | 2.02 |                              |
| ermJ/ermD  | 45A |       |       |      | LowEfficiency, CtIsSmall, S; |
| ermK-01    | 45A |       |       |      | LowEfficiency, CtIsSmall, Ci |
| ermK-02    | 45A |       |       |      | CurveFitFailed               |
| ermT-01    | 45A |       |       |      | LowEfficiency, CtIsSmall, Ci |
| ermT-02    | 45A | 35.15 | 70.76 | 1.99 |                              |
| ermX       | 45A |       |       |      | NoAmplification              |
| ermY       | 45A |       |       |      | LowEfficiency, CtIsSmall, Ci |
| fabK       | 45A | 22.23 | 78.78 | 2.2  |                              |
| floR       | 45A |       |       |      | NoAmplification              |
| folA       | 45A |       |       |      | NoAmplification              |
| fosB       | 45A |       |       |      | LowEfficiency, CtIsSmall, S; |
| fosX       | 45A |       |       |      | LowEfficiency, CtIsSmall, Ci |
| fox5       | 45A | 28.79 | 86.3  | 1.95 |                              |
| imiR       | 45A |       |       |      | NoAmplification              |
| ImrA-01    | 45A |       |       |      | NoAmplification              |
| intl       | 45A | 30.16 | 84.66 | 1.96 |                              |
| intl1      | 45A | 20.94 | 87.15 | 1.98 |                              |
| IS613      | 45A | 21.32 | 79.71 | 2.09 |                              |
| lnuA-01    | 45A |       |       |      | LowEfficiency, CtIsSmall, Ci |
| lnuB-01    | 45A |       |       |      | CurveFitFailed               |
| lnuB-02    | 45A |       |       |      | LowEfficiency, CtIsSmall, S; |

|                |     |       |       |      |                              |
|----------------|-----|-------|-------|------|------------------------------|
| lnuC           | 45A | 31.6  | 87.56 | 1.84 |                              |
| marR-01        | 45A | 33.71 | 86.84 | 1.92 | MultipleMeltPeaks            |
| matA/mel       | 45A | 18.31 | 77.63 | 2.08 |                              |
| mdet1          | 45A |       |       |      | LowEfficiency, CtIsSmall, S: |
| mdtA           | 45A | 37.15 | 82.04 | 1.66 |                              |
| mdtE/yhiU      | 45A | 33.93 | 89.32 | 1.88 |                              |
| mecA           | 45A |       |       |      | LowEfficiency, CtIsSmall, Ci |
| mefA           | 45A | 17.81 | 80.61 | 2.02 |                              |
| mepA           | 45A | 33.06 | 83.81 | 2.01 |                              |
| mexA           | 45A |       |       |      | LowEfficiency, CtIsSmall, Ci |
| mexD           | 45A |       |       |      | NoAmplification              |
| mexE           | 45A | 34.26 | 88.29 | 1.87 |                              |
| mexF           | 45A | 29.21 | 81.61 | 1.81 |                              |
| mphA-01        | 45A | 29.99 | 86.41 | 1.92 | MultipleMeltPeaks            |
| mphA-02        | 45A | 31.16 | 87.65 | 2.34 | MultipleMeltPeaks            |
| mphB           | 45A |       |       |      | CurveFitFailed               |
| mphC           | 45A |       |       |      | LowEfficiency, CtIsSmall, Ci |
| msrA-01        | 45A |       |       |      | LowEfficiency, CtIsSmall, Ci |
| msrC-01        | 45A |       |       |      | NoAmplification              |
| mtrC-01        | 45A |       |       |      | NoAmplification              |
| mtrC-02        | 45A | 35.68 | 84.29 | 1.89 |                              |
| mtrD-02        | 45A | 27.41 | 81.19 | 1.97 |                              |
| mtrD-03        | 45A | 30.53 | 82    | 1.85 |                              |
| NDM1           | 45A |       |       |      | LowEfficiency, CtIsSmall, Ci |
| nimE           | 45A |       |       |      | NoAmplification              |
| nisB           | 45A |       |       |      | NoAmplification              |
| oleC           | 45A | 37.4  | 91.93 | 1.6  | MultipleMeltPeaks            |
| oprD           | 45A | 25.43 | 91.83 | 1.92 |                              |
| oprJ           | 45A | 31.23 | 89.25 | 1.95 |                              |
| pbp            | 45A |       |       |      | LowEfficiency, CtIsSmall, Ci |
| pbp2x          | 45A | 25.82 | 75.02 | 1.9  |                              |
| Pbp5           | 45A |       |       |      | LowEfficiency, CtIsSmall, Ci |
| penA           | 45A |       |       |      | NoAmplification              |
| pikR1          | 45A |       |       |      | LowEfficiency, CtIsSmall, Ci |
| pikR2          | 45A | 32.45 | 84.66 | 1.87 |                              |
| pmrA           | 45A | 20.36 | 79.71 | 2.06 |                              |
| pncA           | 45A | 26.7  | 89.45 | 1.95 |                              |
| putative multi | 45A |       |       |      | LowEfficiency, CtIsSmall, Ci |
| qac            | 45A |       |       |      | LowEfficiency, CtIsSmall, Ci |
| qacA           | 45A |       |       |      | LowEfficiency, CtIsSmall, S: |
| qacA/qacB      | 45A |       |       |      | NoAmplification              |
| qacEdelta1-0   | 45A |       |       |      | LowEfficiency, CtIsSmall, Ci |
| qacEdelta1-0   | 45A | 38.34 | 83.06 | 1.82 | MultipleMeltPeaks            |
| qacH-01        | 45A | 33.01 | 87.73 | 1.88 |                              |
| qacH-02        | 45A | 38.16 | 83.95 | 1.53 |                              |
| qnrA           | 45A |       |       |      | LowEfficiency, CtIsSmall, Ci |

|              |     |       |       |      |                              |
|--------------|-----|-------|-------|------|------------------------------|
| rarD-02      | 45A |       |       |      | NoAmplification              |
| sat4         | 45A |       |       |      | CurveFitFailed               |
| sdeB         | 45A |       |       |      | LowEfficiency, CtIsSmall, Ci |
| spcN-01      | 45A |       |       |      | LowEfficiency, CtIsSmall, Ci |
| speA         | 45A | 37.89 | 71.54 | 1.87 |                              |
| str          | 45A |       |       |      | LowEfficiency, CtIsSmall, Ci |
| strA         | 45A |       |       |      | LowEfficiency, CtIsSmall, Ci |
| strB         | 45A | 29.52 | 83.8  | 1.92 |                              |
| sul1         | 45A | 34.14 | 89.19 | 1.71 | MultipleMeltPeaks            |
| sul2         | 45A |       |       |      | LowEfficiency, CtIsSmall, S; |
| sulA/foIP-01 | 45A | 17.82 | 80.84 | 2.06 |                              |
| sulA/foIP-03 | 45A | 18.73 | 83.27 | 2.02 |                              |
| tet(32)      | 45A | 25.96 | 81.24 | 2.01 |                              |
| tet(34)      | 45A | 30.58 | 75.87 | 2    |                              |
| tet(35)      | 45A |       |       |      | NoAmplification              |
| tet(36)-A    | 45A |       |       |      | LowEfficiency, CtIsSmall, Ci |
| tet(36)-B    | 45A |       |       |      | LowEfficiency, CtIsSmall, S; |
| tet(37)      | 45A | 27.2  | 76.43 | 2.02 |                              |
| tetA-01      | 45A | 30.59 | 85.1  | 1.93 |                              |
| tetA-02      | 45A | 39.86 | 75.48 | 1.78 |                              |
| tetB-01      | 45A | 25.22 | 79.67 | 1.94 |                              |
| tetB-02      | 45A | 24.66 | 79.72 | 2.01 |                              |
| tetC-01      | 45A | 24.39 | 75.29 | 1.96 |                              |
| tetC-02      | 45A | 24.7  | 76.15 | 2.08 |                              |
| tetD-01      | 45A |       |       |      | LowEfficiency, CtIsSmall, Ci |
| tetD-02      | 45A |       |       |      | LowEfficiency, CtIsSmall, Ci |
| tetE         | 45A |       |       |      | LowEfficiency, CtIsSmall, Ci |
| tetG-01      | 45A | 36.86 | 84.89 | 1.76 |                              |
| tetG-02      | 45A | 37.32 | 87.42 | 1.82 |                              |
| tetH         | 45A |       |       |      | LowEfficiency, CtIsSmall, Ci |
| tetJ         | 45A |       |       |      | LowEfficiency, CtIsSmall, Ci |
| tetK         | 45A |       |       |      | LowEfficiency, CtIsSmall, S; |
| tetL-01      | 45A |       |       |      | LowEfficiency, CtIsSmall, Ci |
| tetL-02      | 45A | 31.95 | 85.24 | 1.83 |                              |
| tetM-01      | 45A | 19.47 | 76.27 | 1.99 |                              |
| tetM-02      | 45A | 19.32 | 77.71 | 2.05 |                              |
| tetO-01      | 45A | 21.81 | 76.92 | 2.07 |                              |
| tetPA        | 45A |       |       |      | NoAmplification              |
| tetPB-01     | 45A |       |       |      | NoAmplification              |
| tetPB-02     | 45A | 28.46 | 84.83 | 2.03 |                              |
| tetPB-03     | 45A |       |       |      | LowEfficiency, CtIsSmall, Ci |
| tetPB-05     | 45A |       |       |      | LowEfficiency, CtIsSmall, Ci |
| tetQ         | 45A | 22.95 | 77.11 | 2.09 |                              |
| tetR-02      | 45A | 37.77 | 88.02 | 1.77 |                              |
| tetR-03      | 45A | 23.96 | 76.23 | 2    |                              |
| tetS         | 45A |       |       |      | LowEfficiency, CtIsSmall, S; |

|             |     |       |       |      |                              |
|-------------|-----|-------|-------|------|------------------------------|
| tetT        | 45A |       |       |      | NoAmplification              |
| tetU-01     | 45A |       |       |      | LowEfficiency, CtIsSmall, Ct |
| tetV        | 45A |       |       |      | LowEfficiency, CtIsSmall, S  |
| tetW-01     | 45A | 21.76 | 81.95 | 2.02 |                              |
| tetX        | 45A |       |       |      | BadR2, CtIsSmall, Saturatio  |
| tnpA-01     | 45A | 34.27 | 85.55 | 1.91 |                              |
| tnpA-02     | 45A |       |       |      | LowEfficiency, CtIsSmall, S  |
| tnpA-03     | 45A | 31.43 | 75.25 | 2.06 |                              |
| tnpA-04     | 45A |       |       |      | CurveFitFailed               |
| tnpA-05     | 45A | 35.65 | 80.46 | 1.86 |                              |
| tnpA-07     | 45A |       |       |      | NoAmplification              |
| tolC-01     | 45A | 36.58 | 81.09 | 1.72 | MultipleMeltPeaks            |
| tolC-02     | 45A | 30.3  | 83.84 | 2    | MultipleMeltPeaks            |
| tolC-03     | 45A | 31.09 | 86    | 1.98 |                              |
| Tp614       | 45A | 38.35 | 82.21 | 1.91 | MultipleMeltPeaks            |
| ttgA        | 45A | 33.83 | 88.09 | 1.84 |                              |
| ttgB        | 45A | 36.08 | 79.15 | 1.88 |                              |
| vanA        | 45A |       |       |      | NoAmplification              |
| vanB-01     | 45A | 35.85 | 79.39 | 1.99 | MultipleMeltPeaks            |
| vanC-01     | 45A |       |       |      | LowEfficiency, CtIsSmall, Ct |
| vanC-02     | 45A |       |       |      | LowEfficiency, CtIsSmall, Ct |
| vanC-03     | 45A | 26.54 | 86.28 | 1.96 |                              |
| vanC1       | 45A |       |       |      | NoAmplification              |
| vanC2/vanC3 | 45A | 33.22 | 80.29 | 1.94 | MultipleMeltPeaks            |
| vanG        | 45A |       |       |      | BadR2, CtIsSmall, Saturatio  |
| vanHB       | 45A | 32.86 | 85.35 | 1.89 | MultipleMeltPeaks            |
| vanHD       | 45A |       |       |      | LowEfficiency, CtIsSmall, Ct |
| vanRA-01    | 45A |       |       |      | LowEfficiency, CtIsSmall, S  |
| vanRA-02    | 45A |       |       |      | NoAmplification              |
| vanRB       | 45A | 37.41 | 87.37 | 1.73 |                              |
| vanRC       | 45A |       |       |      | LowEfficiency, CtIsSmall, Ct |
| vanRC4      | 45A |       |       |      | LowEfficiency, CtIsSmall, Ct |
| vanRD       | 45A |       |       |      | BadR2, CtIsSmall, Saturatio  |
| vanSA       | 45A |       |       |      | LowEfficiency, CtIsSmall, S  |
| vanSB       | 45A | 36.38 | 73.28 | 2.13 |                              |
| vanSC-01    | 45A | 37.7  | 77.6  | 1.98 |                              |
| vanSC-02    | 45A |       |       |      | NoAmplification              |
| vanTC-01    | 45A |       |       |      | LowEfficiency, CtIsSmall, S  |
| vanTC-02    | 45A | 36.59 | 81.49 | 1.81 | MultipleMeltPeaks            |
| vanTE       | 45A | 38.95 | 88.88 | 1.78 | MultipleMeltPeaks            |
| vanTG       | 45A |       |       |      | BadR2, CtIsSmall, Saturatio  |
| vanWB       | 45A |       |       |      | LowEfficiency, CtIsSmall, S  |
| vanWG       | 45A |       |       |      | LowEfficiency, CtIsSmall, Ct |
| vanXA       | 45A |       |       |      | LowEfficiency, CtIsSmall, S  |
| vanXB       | 45A |       |       |      | NoAmplification              |
| vanXD       | 45A | 32.43 | 75.44 | 2    |                              |

|              |     |       |       |      |                              |
|--------------|-----|-------|-------|------|------------------------------|
| vanYB        | 45A |       |       |      | LowEfficiency, CtIsSmall, Ci |
| vanYD-01     | 45A | 34.23 | 80.79 | 1.85 |                              |
| vanYD-02     | 45A |       |       |      | LowEfficiency, CtIsSmall, Ci |
| vatB-01      | 45A |       |       |      | LowEfficiency, CtIsSmall, Ci |
| vatB-02      | 45A |       |       |      | LowEfficiency, CtIsSmall, Ci |
| vatC-01      | 45A | 36.43 | 81.26 | 1.83 |                              |
| vatC-02      | 45A |       |       |      | CurveFitFailed               |
| vatE-01      | 45A | 33.19 | 75.71 | 2.02 |                              |
| vatE-02      | 45A |       |       |      | NoAmplification              |
| vgaA-01      | 45A |       |       |      | LowEfficiency, CtIsSmall, Ci |
| vgaA-02      | 45A |       |       |      | LowEfficiency, CtIsSmall, S  |
| vgb-01       | 45A |       |       |      | LowEfficiency, CtIsSmall, Ci |
| vgbB-01      | 45A |       |       |      | NoAmplification              |
| vgbB-02      | 45A |       |       |      | NoAmplification              |
| yceE/mdtG-0  | 45A |       |       |      | LowEfficiency, CtIsSmall, S  |
| yceE/mdtG-0  | 45A |       |       |      | LowEfficiency, CtIsSmall, Ci |
| yceL/mdtH-0  | 45A | 32.86 | 89.08 | 1.93 |                              |
| yceL/mdtH-0  | 45A |       |       |      | LowEfficiency, CtIsSmall, Ci |
| yceL/mdtH-0  | 45A | 37.48 | 77.63 | 1.84 |                              |
| yidY/mdtL-01 | 45A | 33.6  | 82.46 | 1.95 | MultipleMeltPeaks            |
| yidY/mdtL-02 | 45A |       |       |      | BadR2, LowEfficiency, CtIsS  |































| Assay          | Sample | Ct | Tm    | Efficiency | flag                   |
|----------------|--------|----|-------|------------|------------------------|
| 16S rRNA       | 45B    |    | 17.01 | 82.11      | 1.99                   |
| aac            | 45B    |    | 29.49 | 81.22      | 1.82 MultipleMeltPeaks |
| aac(6')-Ib(akz | 45B    |    |       |            | NoAmplification        |
| aac(6')-Ib(akz | 45B    |    | 30.58 | 87.04      | 1.99                   |
| aac(6')-Ib(akz | 45B    |    | 30.6  | 87.25      | 1.98 MultipleMeltPeaks |
| aac(6')-II     | 45B    |    | 33.79 | 83.96      | 1.91 MultipleMeltPeaks |
| aac(6')I1      | 45B    |    |       |            | NoAmplification        |
| aacA/aphD      | 45B    |    |       |            | NoAmplification        |
| aacC           | 45B    |    | 32.3  | 91.82      | 1.88                   |
| aacC1          | 45B    |    |       |            | NoAmplification        |
| aacC2          | 45B    |    |       |            | NoAmplification        |
| aacC4          | 45B    |    | 33.56 | 89.4       | 1.79                   |
| aadA-01        | 45B    |    |       |            | NoAmplification        |
| aadA-02        | 45B    |    | 36.08 | 80.31      | 1.82                   |
| aadA-1-01      | 45B    |    | 32.05 | 81.57      | 1.92                   |
| aadA-1-02      | 45B    |    |       |            | NoAmplification        |
| aadA1          | 45B    |    | 35.73 | 85.76      | 1.84                   |
| aadA2-01       | 45B    |    |       |            | NoAmplification        |
| aadA2-02       | 45B    |    | 34.25 | 74.9       | 1.98                   |
| aadA2-03       | 45B    |    |       |            | NoAmplification        |
| aadA5-01       | 45B    |    |       |            | NoAmplification        |
| aadA5-02       | 45B    |    | 34.09 | 83.29      | 1.9 MultipleMeltPeaks  |
| aadA9-01       | 45B    |    | 35.9  | 89.23      | 1.84 MultipleMeltPeaks |
| aadA9-02       | 45B    |    |       |            | NoAmplification        |
| aadD           | 45B    |    |       |            | NoAmplification        |
| aadE           | 45B    |    |       |            | NoAmplification        |
| acrA-01        | 45B    |    | 32.29 | 88.7       | 1.9                    |
| acrA-02        | 45B    |    |       |            | NoAmplification        |
| acrA-03        | 45B    |    | 33.73 | 79.11      | 1.81 MultipleMeltPeaks |
| acrA-04        | 45B    |    | 31.81 | 80.5       | 1.94                   |
| acrA-05        | 45B    |    | 31.55 | 88.37      | 1.9                    |
| acrB-01        | 45B    |    | 33.97 | 76.76      | 1.96                   |
| acrF           | 45B    |    | 32.96 | 84.89      | 1.66 MultipleMeltPeaks |
| acrR-01        | 45B    |    | 36.57 | 80.86      | 1.77 MultipleMeltPeaks |
| acrR-02        | 45B    |    | 34.96 | 86.01      | 1.81                   |
| Actin          | 45B    |    | 19.35 | 87.06      | 1.96                   |
| adeA           | 45B    |    | 36.46 | 88.04      | 1.89                   |
| ampC-01        | 45B    |    | 33.82 | 85.48      | 1.83                   |
| ampC-02        | 45B    |    |       |            | NoAmplification        |
| ampC-04        | 45B    |    | 33.71 | 78.14      | 1.81                   |
| ampC-05        | 45B    |    |       |            | NoAmplification        |
| ampC-06        | 45B    |    |       |            | NoAmplification        |
| ampC-07        | 45B    |    | 37.1  | 88.12      | 1.77                   |
| ampC-09        | 45B    |    |       |            | NoAmplification        |
| ampC/blaDH     | 45B    |    | 28.86 | 85.22      | 1.96                   |

|                            |     |       |       |      |                   |
|----------------------------|-----|-------|-------|------|-------------------|
| aph                        | 45B |       |       |      | NoAmplification   |
| aph(2')-Id-01              | 45B |       |       |      | NoAmplification   |
| aph(2')-Id-02              | 45B |       |       |      | NoAmplification   |
| aph6ia                     | 45B | 30.14 | 78.15 | 1.94 |                   |
| aphA1(aka k <sub>z</sub> ) | 45B |       |       |      | NoAmplification   |
| bacA-01                    | 45B |       |       |      | NoAmplification   |
| bacA-02                    | 45B | 39.24 | 88.03 | 1.5  |                   |
| BETA-globin                | 45B | 20.53 | 84.03 | 1.95 |                   |
| bla-ACC-1                  | 45B | 33.7  | 86.49 | 1.9  |                   |
| bla-L1                     | 45B | 30.5  | 85.02 | 1.96 |                   |
| bla1                       | 45B |       |       |      | NoAmplification   |
| blaCMY                     | 45B |       |       |      | NoAmplification   |
| blaCMY2-01                 | 45B |       |       |      | NoAmplification   |
| blaCMY2-02                 | 45B | 30.81 | 85.18 | 1.92 |                   |
| blaCTX-M-01                | 45B |       |       |      | NoAmplification   |
| blaCTX-M-02                | 45B | 38.13 | 79.69 | 1.8  |                   |
| blaCTX-M-03                | 45B |       |       |      | NoAmplification   |
| blaCTX-M-04                | 45B | 32.46 | 88.38 | 1.73 |                   |
| blaCTX-M-05                | 45B |       |       |      | NoAmplification   |
| blaCTX-M-06                | 45B | 34.43 | 89.48 | 1.77 |                   |
| blaGES                     | 45B |       |       |      | NoAmplification   |
| blaIMP-01                  | 45B |       |       |      | NoAmplification   |
| blaIMP-02                  | 45B |       |       |      | NoAmplification   |
| blaMOX/blaC                | 45B |       |       |      | NoAmplification   |
| blaOCH                     | 45B |       |       |      | NoAmplification   |
| blaOKP                     | 45B |       |       |      | NoAmplification   |
| blaOXA1/blaC               | 45B |       |       |      | NoAmplification   |
| blaOXA10-01                | 45B |       |       |      | NoAmplification   |
| blaOXA10-02                | 45B |       |       |      | NoAmplification   |
| blaOXY                     | 45B | 38.58 | 88.98 | 1.66 |                   |
| blaPAO                     | 45B |       |       |      | NoAmplification   |
| blaPER                     | 45B |       |       |      | NoAmplification   |
| blaPSE                     | 45B |       |       |      | NoAmplification   |
| blaROB                     | 45B |       |       |      | NoAmplification   |
| blaSFO                     | 45B | 32.37 | 92.6  | 1.84 |                   |
| blaSHV-01                  | 45B |       |       |      | NoAmplification   |
| blaSHV-02                  | 45B | 36.3  | 92.41 | 1.67 |                   |
| blaTEM                     | 45B |       |       |      | NoAmplification   |
| blaTLA                     | 45B |       |       |      | NoAmplification   |
| blaVEB                     | 45B |       |       |      | NoAmplification   |
| blaVIM                     | 45B |       |       |      | NoAmplification   |
| blaZ                       | 45B |       |       |      | NoAmplification   |
| carB                       | 45B |       |       |      | NoAmplification   |
| catA1                      | 45B |       |       |      | NoAmplification   |
| catB3                      | 45B | 32.73 | 87.51 | 2.02 |                   |
| catB8                      | 45B | 32.21 | 82.41 | 2.01 | MultipleMeltPeaks |

|            |     |       |       |      |                              |
|------------|-----|-------|-------|------|------------------------------|
| ceoA       | 45B | 26.42 | 85.99 | 2    | MultipleMeltPeaks            |
| cepA       | 45B |       |       |      | NoAmplification              |
| cfiA       | 45B | 35.89 | 86.2  | 1.9  |                              |
| cfr        | 45B |       |       |      | NoAmplification              |
| cfxA       | 45B | 20.33 | 77.48 | 1.84 |                              |
| cmeA       | 45B |       |       |      | NoAmplification              |
| cmlA1-01   | 45B |       |       |      | NoAmplification              |
| cmlA1-02   | 45B | 34    | 81.45 | 1.89 | MultipleMeltPeaks            |
| cmr        | 45B |       |       |      | NoAmplification              |
| cmx(A)     | 45B | 25.1  | 86.52 | 1.99 | MultipleMeltPeaks            |
| cphA-01    | 45B | 30.98 | 86.33 | 1.69 |                              |
| cphA-02    | 45B | 37.39 | 82.4  | 1.81 |                              |
| dfrA1      | 45B | 35.89 | 88.35 | 1.9  |                              |
| dfrA12     | 45B | 34.1  | 77.23 | 1.94 |                              |
| emrD       | 45B | 38.54 | 76.92 | 1.66 | MultipleMeltPeaks            |
| ereA       | 45B |       |       |      | NoAmplification              |
| ereB       | 45B | 36.47 | 81.66 | 1.8  | MultipleMeltPeaks            |
| erm(34)    | 45B |       |       |      | NoAmplification              |
| erm(35)    | 45B |       |       |      | NoAmplification              |
| erm(36)    | 45B | 34.8  | 86.19 | 2.1  | MultipleMeltPeaks            |
| ermA       | 45B |       |       |      | NoAmplification              |
| ermA/ermTR | 45B |       |       |      | NoAmplification              |
| ermB       | 45B | 22.13 | 74.79 | 2.11 |                              |
| ermC       | 45B |       |       |      | NoAmplification              |
| ermF       | 45B | 23.05 | 74.48 | 2.01 |                              |
| ermJ/ermD  | 45B |       |       |      | NoAmplification              |
| ermK-01    | 45B | 37.54 | 78.26 | 1.89 |                              |
| ermK-02    | 45B |       |       |      | NoAmplification              |
| ermT-01    | 45B |       |       |      | NoAmplification              |
| ermT-02    | 45B |       |       |      | NoAmplification              |
| ermX       | 45B | 27.87 | 83.55 | 1.81 |                              |
| ermY       | 45B |       |       |      | NoAmplification              |
| fabK       | 45B | 24.81 | 78.73 | 2.04 |                              |
| floR       | 45B |       |       |      | NoAmplification              |
| folA       | 45B |       |       |      | NoAmplification              |
| fosB       | 45B |       |       |      | LowEfficiency, CtIsSmall, S: |
| fosX       | 45B |       |       |      | NoAmplification              |
| fox5       | 45B | 27.3  | 86.16 | 1.85 |                              |
| imiR       | 45B |       |       |      | NoAmplification              |
| ImrA-01    | 45B |       |       |      | NoAmplification              |
| intl       | 45B | 29.39 | 84.75 | 1.86 |                              |
| intl1      | 45B | 19.96 | 87.48 | 1.91 |                              |
| IS613      | 45B | 22.46 | 79.62 | 2.1  |                              |
| lnuA-01    | 45B |       |       |      | NoAmplification              |
| lnuB-01    | 45B |       |       |      | NoAmplification              |
| lnuB-02    | 45B |       |       |      | NoAmplification              |

|                |     |       |       |      |                   |
|----------------|-----|-------|-------|------|-------------------|
| lnuC           | 45B |       |       |      | CurveFitFailed    |
| marR-01        | 45B | 31.74 | 85.11 | 1.92 |                   |
| matA/mel       | 45B | 19.83 | 77.53 | 2.03 |                   |
| mdet1          | 45B |       |       |      | NoAmplification   |
| mdtA           | 45B | 33.88 | 81.98 | 1.7  |                   |
| mdtE/yhiU      | 45B |       |       |      | NoAmplification   |
| mecA           | 45B |       |       |      | NoAmplification   |
| mefA           | 45B | 19.24 | 80.48 | 1.96 |                   |
| mepA           | 45B | 35.98 | 84.79 | 1.86 | MultipleMeltPeaks |
| mexA           | 45B | 33.93 | 84.54 | 1.85 |                   |
| mexD           | 45B |       |       |      | NoAmplification   |
| mexE           | 45B | 33.04 | 78.13 | 1.91 |                   |
| mexF           | 45B | 28.09 | 83.11 | 1.71 |                   |
| mphA-01        | 45B | 28.12 | 89.12 | 2.01 | MultipleMeltPeaks |
| mphA-02        | 45B | 28.88 | 86.65 | 1.67 | MultipleMeltPeaks |
| mphB           | 45B |       |       |      | NoAmplification   |
| mphC           | 45B |       |       |      | NoAmplification   |
| msrA-01        | 45B | 38.07 | 71.94 | 1.88 |                   |
| msrC-01        | 45B |       |       |      | NoAmplification   |
| mtrC-01        | 45B | 34.39 | 79.42 | 1.94 |                   |
| mtrC-02        | 45B |       |       |      | NoAmplification   |
| mtrD-02        | 45B | 28.79 | 81.01 | 1.88 | MultipleMeltPeaks |
| mtrD-03        | 45B | 31.48 | 81.91 | 1.75 |                   |
| NDM1           | 45B | 36.14 | 83.39 | 1.99 |                   |
| nimE           | 45B |       |       |      | NoAmplification   |
| nisB           | 45B |       |       |      | NoAmplification   |
| oleC           | 45B |       |       |      | NoAmplification   |
| oprD           | 45B | 27.11 | 91.84 | 1.95 |                   |
| oprJ           | 45B | 32.9  | 90.71 | 1.88 |                   |
| pbp            | 45B |       |       |      | NoAmplification   |
| pbp2x          | 45B |       |       |      | NoAmplification   |
| Pbp5           | 45B |       |       |      | NoAmplification   |
| penA           | 45B |       |       |      | NoAmplification   |
| pikR1          | 45B |       |       |      | NoAmplification   |
| pikR2          | 45B | 31.82 | 84.9  | 1.68 |                   |
| pmrA           | 45B | 22.35 | 79.65 | 2.01 |                   |
| pncA           | 45B | 27.64 | 89.17 | 1.88 |                   |
| putative multi | 45B |       |       |      | NoAmplification   |
| qac            | 45B | 36.06 | 74.56 | 1.97 |                   |
| qacA           | 45B | 34.64 | 69.98 | 1.68 |                   |
| qacA/qacB      | 45B |       |       |      | NoAmplification   |
| qacEdelta1-0   | 45B |       |       |      | NoAmplification   |
| qacEdelta1-0   | 45B | 35.14 | 75.4  | 1.92 | MultipleMeltPeaks |
| qacH-01        | 45B | 34    | 85.67 | 1.89 |                   |
| qacH-02        | 45B | 34.54 | 83.9  | 1.64 |                   |
| qnrA           | 45B | 42.48 | 76.72 | 1.78 | MultipleMeltPeaks |



|              |     |       |       |      |                   |
|--------------|-----|-------|-------|------|-------------------|
| rarD-02      | 45B |       |       |      | NoAmplification   |
| sat4         | 45B |       |       |      | NoAmplification   |
| sdeB         | 45B |       |       |      | NoAmplification   |
| spcN-01      | 45B |       |       |      | NoAmplification   |
| speA         | 45B |       |       |      | NoAmplification   |
| str          | 45B |       |       |      | NoAmplification   |
| strA         | 45B |       |       |      | NoAmplification   |
| strB         | 45B | 33.02 | 79.9  | 1.89 |                   |
| sul1         | 45B | 32.1  | 89.58 | 1.96 |                   |
| sul2         | 45B |       |       |      | NoAmplification   |
| sulA/foIP-01 | 45B | 21.11 | 80.8  | 2.02 |                   |
| sulA/foIP-03 | 45B | 22.03 | 83.2  | 1.94 |                   |
| tet(32)      | 45B | 23.64 | 81.26 | 1.95 |                   |
| tet(34)      | 45B | 32.03 | 75.48 | 1.97 |                   |
| tet(35)      | 45B |       |       |      | NoAmplification   |
| tet(36)-A    | 45B |       |       |      | NoAmplification   |
| tet(36)-B    | 45B |       |       |      | NoAmplification   |
| tet(37)      | 45B | 27.27 | 75.63 | 1.99 | MultipleMeltPeaks |
| tetA-01      | 45B | 30.82 | 85.04 | 1.97 |                   |
| tetA-02      | 45B | 35.97 | 86.89 | 1.81 |                   |
| tetB-01      | 45B | 23.99 | 79.53 | 1.93 | MultipleMeltPeaks |
| tetB-02      | 45B | 23.42 | 79.69 | 1.98 |                   |
| tetC-01      | 45B | 23.66 | 75.16 | 1.92 |                   |
| tetC-02      | 45B | 23.7  | 76.05 | 2.1  |                   |
| tetD-01      | 45B |       |       |      | NoAmplification   |
| tetD-02      | 45B | 35.65 | 76.22 | 2    |                   |
| tetE         | 45B |       |       |      | NoAmplification   |
| tetG-01      | 45B | 33.86 | 84.82 | 1.95 |                   |
| tetG-02      | 45B | 36.02 | 78.86 | 1.77 |                   |
| tetH         | 45B |       |       |      | NoAmplification   |
| tetJ         | 45B |       |       |      | NoAmplification   |
| tetK         | 45B |       |       |      | NoAmplification   |
| tetL-01      | 45B |       |       |      | NoAmplification   |
| tetL-02      | 45B | 29.08 | 85.11 | 1.88 | MultipleMeltPeaks |
| tetM-01      | 45B | 21.94 | 76.11 | 2    |                   |
| tetM-02      | 45B | 21.8  | 77.62 | 2.06 |                   |
| tetO-01      | 45B | 21.86 | 76.82 | 2.05 |                   |
| tetPA        | 45B |       |       |      | NoAmplification   |
| tetPB-01     | 45B |       |       |      | NoAmplification   |
| tetPB-02     | 45B | 28.03 | 84.74 | 2.04 |                   |
| tetPB-03     | 45B |       |       |      | NoAmplification   |
| tetPB-05     | 45B |       |       |      | NoAmplification   |
| tetQ         | 45B | 20.97 | 77.17 | 2.05 |                   |
| tetR-02      | 45B | 33.59 | 88.15 | 1.84 |                   |
| tetR-03      | 45B | 23.38 | 76.09 | 2    |                   |
| tetS         | 45B | 31.76 | 85.2  | 1.59 |                   |

|             |     |       |       |      |                             |
|-------------|-----|-------|-------|------|-----------------------------|
| tetT        | 45B |       |       |      | NoAmplification             |
| tetU-01     | 45B |       |       |      | NoAmplification             |
| tetV        | 45B |       |       |      | NoAmplification             |
| tetW-01     | 45B | 23.78 | 81.84 | 1.98 |                             |
| tetX        | 45B |       |       |      | NoAmplification             |
| tnpA-01     | 45B |       |       |      | NoAmplification             |
| tnpA-02     | 45B | 36.2  | 84.54 | 1.61 |                             |
| tnpA-03     | 45B |       |       |      | NoAmplification             |
| tnpA-04     | 45B |       |       |      | NoAmplification             |
| tnpA-05     | 45B | 28.17 | 80.73 | 1.87 |                             |
| tnpA-07     | 45B |       |       |      | NoAmplification             |
| tolC-01     | 45B | 42.83 | 80.8  | 1.65 | MultipleMeltPeaks           |
| tolC-02     | 45B | 28.6  | 87.53 | 1.94 | MultipleMeltPeaks           |
| tolC-03     | 45B | 30.27 | 86.3  | 1.98 |                             |
| Tp614       | 45B | 36.22 | 73.49 | 1.85 |                             |
| ttgA        | 45B | 33.8  | 86.32 | 1.87 |                             |
| ttgB        | 45B | 33.46 | 80.06 | 1.99 | MultipleMeltPeaks           |
| vanA        | 45B |       |       |      | NoAmplification             |
| vanB-01     | 45B | 35.51 | 84.05 | 1.95 |                             |
| vanC-01     | 45B |       |       |      | NoAmplification             |
| vanC-02     | 45B |       |       |      | NoAmplification             |
| vanC-03     | 45B | 24.43 | 86.16 | 1.97 | MultipleMeltPeaks           |
| vanC1       | 45B |       |       |      | NoAmplification             |
| vanC2/vanC3 | 45B | 30.4  | 84.51 | 1.95 | MultipleMeltPeaks           |
| vanG        | 45B |       |       |      | BadR2, CtlSSmall, Saturatio |
| vanHB       | 45B | 34.57 | 84.47 | 1.85 |                             |
| vanHD       | 45B |       |       |      | NoAmplification             |
| vanRA-01    | 45B |       |       |      | NoAmplification             |
| vanRA-02    | 45B |       |       |      | NoAmplification             |
| vanRB       | 45B |       |       |      | NoAmplification             |
| vanRC       | 45B |       |       |      | NoAmplification             |
| vanRC4      | 45B |       |       |      | NoAmplification             |
| vanRD       | 45B |       |       |      | BadR2, CtlSSmall, Saturatio |
| vanSA       | 45B |       |       |      | NoAmplification             |
| vanSB       | 45B |       |       |      | NoAmplification             |
| vanSC-01    | 45B | 39.42 | 83.99 | 1.82 |                             |
| vanSC-02    | 45B |       |       |      | NoAmplification             |
| vanTC-01    | 45B |       |       |      | NoAmplification             |
| vanTC-02    | 45B |       |       |      | NoAmplification             |
| vanTE       | 45B |       |       |      | NoAmplification             |
| vanTG       | 45B |       |       |      | NoAmplification             |
| vanWB       | 45B |       |       |      | NoAmplification             |
| vanWG       | 45B |       |       |      | NoAmplification             |
| vanXA       | 45B | 38.39 | 72.55 | 1.72 |                             |
| vanXB       | 45B |       |       |      | NoAmplification             |
| vanXD       | 45B | 32    | 74.74 | 2.03 |                             |

|              |     |       |       |                        |
|--------------|-----|-------|-------|------------------------|
| vanYB        | 45B | 39.12 | 85.01 | 1.73                   |
| vanYD-01     | 45B | 32.59 | 81.78 | 1.7                    |
| vanYD-02     | 45B |       |       | NoAmplification        |
| vatB-01      | 45B |       |       | NoAmplification        |
| vatB-02      | 45B | 34.3  | 84.69 | 2.01                   |
| vatC-01      | 45B | 36.89 | 81.19 | 1.79                   |
| vatC-02      | 45B | 36.29 | 83.19 | 1.82 MultipleMeltPeaks |
| vatE-01      | 45B | 31.59 | 77.49 | 1.98                   |
| vatE-02      | 45B |       |       | NoAmplification        |
| vgaA-01      | 45B |       |       | NoAmplification        |
| vgaA-02      | 45B | 32.3  | 71.64 | 2.01                   |
| vgb-01       | 45B | 34.79 | 75.27 | 1.84 MultipleMeltPeaks |
| vgbB-01      | 45B |       |       | NoAmplification        |
| vgbB-02      | 45B |       |       | NoAmplification        |
| yceE/mdtG-0  | 45B |       |       | NoAmplification        |
| yceE/mdtG-0  | 45B | 39.61 | 80.92 | 1.72                   |
| yceL/mdtH-0  | 45B | 32.42 | 85.7  | 1.9 MultipleMeltPeaks  |
| yceL/mdtH-0  | 45B |       |       | NoAmplification        |
| yceL/mdtH-0  | 45B | 30.87 | 81.54 | 2.01                   |
| yidY/mdtL-01 | 45B | 32.76 | 84.73 | 1.95                   |
| yidY/mdtL-02 | 45B |       |       | NoAmplification        |































| Assay          | Sample | Ct | Tm    | Efficiency | flag                   |
|----------------|--------|----|-------|------------|------------------------|
| 16S rRNA       | 45C    |    | 17.17 | 82.12      | 2.02                   |
| aac            | 45C    |    | 29.11 | 80.79      | 1.75 MultipleMeltPeaks |
| aac(6')-Ib(akz | 45C    |    |       |            | NoAmplification        |
| aac(6')-Ib(akz | 45C    |    | 30.19 | 86.05      | 1.99                   |
| aac(6')-Ib(akz | 45C    |    | 32.47 | 79.68      | 2                      |
| aac(6')-II     | 45C    |    | 37.95 | 80.92      | 1.58 MultipleMeltPeaks |
| aac(6')I1      | 45C    |    | 35.35 | 87.39      | 1.8                    |
| aacA/aphD      | 45C    |    |       |            | NoAmplification        |
| aacC           | 45C    |    | 31.28 | 91.81      | 1.95                   |
| aacC1          | 45C    |    |       |            | NoAmplification        |
| aacC2          | 45C    |    |       |            | NoAmplification        |
| aacC4          | 45C    |    |       |            | NoAmplification        |
| aadA-01        | 45C    |    | 37.16 | 84.02      | 1.85 MultipleMeltPeaks |
| aadA-02        | 45C    |    | 41.74 | 80.4       | 1.65                   |
| aadA-1-01      | 45C    |    |       |            | NoAmplification        |
| aadA-1-02      | 45C    |    |       |            | NoAmplification        |
| aadA1          | 45C    |    | 34.67 | 83.3       | 1.97                   |
| aadA2-01       | 45C    |    |       |            | NoAmplification        |
| aadA2-02       | 45C    |    | 33.49 | 75.04      | 1.91                   |
| aadA2-03       | 45C    |    |       |            | NoAmplification        |
| aadA5-01       | 45C    |    | 37.5  | 88.44      | 1.77 MultipleMeltPeaks |
| aadA5-02       | 45C    |    | 33.3  | 85.16      | 1.9                    |
| aadA9-01       | 45C    |    | 39.12 | 80.63      | 1.7 MultipleMeltPeaks  |
| aadA9-02       | 45C    |    |       |            | NoAmplification        |
| aadD           | 45C    |    |       |            | NoAmplification        |
| aadE           | 45C    |    |       |            | NoAmplification        |
| acrA-01        | 45C    |    | 30.8  | 88.73      | 2.01                   |
| acrA-02        | 45C    |    |       |            | NoAmplification        |
| acrA-03        | 45C    |    | 33.19 | 88.67      | 1.74                   |
| acrA-04        | 45C    |    | 31.46 | 80.34      | 1.93                   |
| acrA-05        | 45C    |    | 29.19 | 79.83      | 1.91 MultipleMeltPeaks |
| acrB-01        | 45C    |    | 34.25 | 78.97      | 2.02                   |
| acrF           | 45C    |    | 31.42 | 84.67      | 1.57                   |
| acrR-01        | 45C    |    | 36.77 | 81.17      | 1.81 MultipleMeltPeaks |
| acrR-02        | 45C    |    | 32.63 | 85.93      | 1.97                   |
| Actin          | 45C    |    | 19.23 | 87.08      | 1.96                   |
| adeA           | 45C    |    |       |            | NoAmplification        |
| ampC-01        | 45C    |    | 31.7  | 85.12      | 1.95                   |
| ampC-02        | 45C    |    |       |            | NoAmplification        |
| ampC-04        | 45C    |    | 32.95 | 78.38      | 1.8                    |
| ampC-05        | 45C    |    |       |            | NoAmplification        |
| ampC-06        | 45C    |    |       |            | NoAmplification        |
| ampC-07        | 45C    |    | 37.47 | 88.01      | 1.71 MultipleMeltPeaks |
| ampC-09        | 45C    |    |       |            | NoAmplification        |
| ampC/blaDH     | 45C    |    | 29.46 | 87.42      | 1.98 MultipleMeltPeaks |

|                            |     |       |       |      |                   |
|----------------------------|-----|-------|-------|------|-------------------|
| aph                        | 45C |       |       |      | NoAmplification   |
| aph(2')-Id-01              | 45C |       |       |      | NoAmplification   |
| aph(2')-Id-02              | 45C |       |       |      | NoAmplification   |
| aph6ia                     | 45C | 30.18 | 78.04 | 1.98 |                   |
| aphA1(aka k <sub>z</sub> ) | 45C | 28.65 | 76.39 | 2.06 |                   |
| bacA-01                    | 45C |       |       |      | NoAmplification   |
| bacA-02                    | 45C | 34.42 | 86.77 | 1.72 |                   |
| BETA-globin                | 45C | 20.68 | 84.05 | 1.95 |                   |
| bla-ACC-1                  | 45C | 33.01 | 86.99 | 1.93 |                   |
| bla-L1                     | 45C | 29.87 | 85.91 | 1.95 | MultipleMeltPeaks |
| bla1                       | 45C |       |       |      | NoAmplification   |
| blaCMY                     | 45C |       |       |      | NoAmplification   |
| blaCMY2-01                 | 45C |       |       |      | NoAmplification   |
| blaCMY2-02                 | 45C | 28.85 | 85.2  | 2.01 |                   |
| blaCTX-M-01                | 45C |       |       |      | NoAmplification   |
| blaCTX-M-02                | 45C | 36.81 | 79.7  | 1.76 | MultipleMeltPeaks |
| blaCTX-M-03                | 45C |       |       |      | NoAmplification   |
| blaCTX-M-04                | 45C | 32.09 | 88.39 | 1.74 |                   |
| blaCTX-M-05                | 45C | 34.25 | 76.75 | 1.83 |                   |
| blaCTX-M-06                | 45C |       |       |      | NoAmplification   |
| blaGES                     | 45C |       |       |      | NoAmplification   |
| blaIMP-01                  | 45C |       |       |      | NoAmplification   |
| blaIMP-02                  | 45C | 38.29 | 80.34 | 1.8  | MultipleMeltPeaks |
| blaMOX/blaC                | 45C |       |       |      | NoAmplification   |
| blaOCH                     | 45C | 29.69 | 85.57 | 1.96 |                   |
| blaOKP                     | 45C |       |       |      | NoAmplification   |
| blaOXA1/blaC               | 45C |       |       |      | NoAmplification   |
| blaOXA10-01                | 45C |       |       |      | NoAmplification   |
| blaOXA10-02                | 45C |       |       |      | NoAmplification   |
| blaOXY                     | 45C |       |       |      | NoAmplification   |
| blaPAO                     | 45C |       |       |      | NoAmplification   |
| blaPER                     | 45C |       |       |      | NoAmplification   |
| blaPSE                     | 45C |       |       |      | NoAmplification   |
| blaROB                     | 45C |       |       |      | NoAmplification   |
| blaSFO                     | 45C | 31.53 | 88.76 | 1.88 | MultipleMeltPeaks |
| blaSHV-01                  | 45C |       |       |      | NoAmplification   |
| blaSHV-02                  | 45C |       |       |      | NoAmplification   |
| blaTEM                     | 45C | 28.77 | 79.27 | 1.87 |                   |
| blaTLA                     | 45C |       |       |      | NoAmplification   |
| blaVEB                     | 45C |       |       |      | NoAmplification   |
| blaVIM                     | 45C |       |       |      | NoAmplification   |
| blaZ                       | 45C |       |       |      | NoAmplification   |
| carB                       | 45C |       |       |      | NoAmplification   |
| catA1                      | 45C |       |       |      | NoAmplification   |
| catB3                      | 45C | 31.05 | 87.52 | 2.02 |                   |
| catB8                      | 45C | 30.78 | 81.62 | 2    |                   |

|            |     |       |       |      |                              |
|------------|-----|-------|-------|------|------------------------------|
| ceoA       | 45C | 26.21 | 87.8  | 1.97 | MultipleMeltPeaks            |
| cepA       | 45C |       |       |      | NoAmplification              |
| cfiA       | 45C | 33.58 | 86.11 | 1.83 |                              |
| cfr        | 45C |       |       |      | NoAmplification              |
| cfxA       | 45C | 20.41 | 77.51 | 1.86 |                              |
| cmeA       | 45C |       |       |      | NoAmplification              |
| cmlA1-01   | 45C |       |       |      | NoAmplification              |
| cmlA1-02   | 45C | 44.85 | 87.26 | 1.56 | MultipleMeltPeaks            |
| cmr        | 45C | 37.64 | 78.55 | 2.14 | BadR2, MultipleMeltPeaks     |
| cmx(A)     | 45C | 28.43 | 86.37 | 1.89 | MultipleMeltPeaks            |
| cphA-01    | 45C | 34.12 | 85.33 | 1.93 | MultipleMeltPeaks            |
| cphA-02    | 45C | 34.39 | 78.32 | 1.93 | MultipleMeltPeaks            |
| dfrA1      | 45C | 33.58 | 79.5  | 1.97 |                              |
| dfrA12     | 45C | 36.92 | 81.98 | 1.8  | MultipleMeltPeaks            |
| emrD       | 45C |       |       |      | NoAmplification              |
| ereA       | 45C | 38.36 | 83.19 | 1.83 |                              |
| ereB       | 45C |       |       |      | NoAmplification              |
| erm(34)    | 45C |       |       |      | NoAmplification              |
| erm(35)    | 45C |       |       |      | NoAmplification              |
| erm(36)    | 45C | 33.09 | 86.48 | 1.86 |                              |
| ermA       | 45C |       |       |      | NoAmplification              |
| ermA/ermTR | 45C |       |       |      | NoAmplification              |
| ermB       | 45C | 22.29 | 74.86 | 2.21 |                              |
| ermC       | 45C |       |       |      | NoAmplification              |
| ermF       | 45C | 22.83 | 74.51 | 2.01 |                              |
| ermJ/ermD  | 45C |       |       |      | NoAmplification              |
| ermK-01    | 45C |       |       |      | NoAmplification              |
| ermK-02    | 45C | 37.72 | 88.66 | 1.78 | MultipleMeltPeaks            |
| ermT-01    | 45C |       |       |      | NoAmplification              |
| ermT-02    | 45C |       |       |      | NoAmplification              |
| ermX       | 45C | 27.85 | 83.58 | 1.8  |                              |
| ermY       | 45C |       |       |      | NoAmplification              |
| fabK       | 45C | 25.02 | 78.71 | 2.09 |                              |
| floR       | 45C | 35.68 | 89.45 | 1.73 | MultipleMeltPeaks            |
| folA       | 45C |       |       |      | NoAmplification              |
| fosB       | 45C |       |       |      | LowEfficiency, CtIsSmall, S: |
| fosX       | 45C |       |       |      | NoAmplification              |
| fox5       | 45C | 27.54 | 87.17 | 1.86 | MultipleMeltPeaks            |
| imiR       | 45C |       |       |      | NoAmplification              |
| ImrA-01    | 45C | 35.92 | 82.62 | 1.84 |                              |
| intl       | 45C | 28.92 | 84.78 | 1.95 |                              |
| intl1      | 45C | 19.56 | 87.56 | 1.94 |                              |
| IS613      | 45C | 22.74 | 79.61 | 2.08 |                              |
| lnuA-01    | 45C |       |       |      | NoAmplification              |
| lnuB-01    | 45C |       |       |      | NoAmplification              |
| lnuB-02    | 45C |       |       |      | NoAmplification              |

|                |     |       |       |      |                   |
|----------------|-----|-------|-------|------|-------------------|
| lnuC           | 45C | 33.75 | 84.1  | 1.78 | MultipleMeltPeaks |
| marR-01        | 45C | 31.17 | 86.17 | 1.95 | MultipleMeltPeaks |
| matA/mel       | 45C | 19.86 | 77.54 | 2.03 |                   |
| mdetI1         | 45C |       |       |      | NoAmplification   |
| mdtA           | 45C | 31.94 | 81.84 | 1.73 | MultipleMeltPeaks |
| mdtE/yhiU      | 45C | 35.16 | 80.45 | 1.92 |                   |
| mecA           | 45C |       |       |      | NoAmplification   |
| mefA           | 45C | 19.34 | 80.44 | 1.98 |                   |
| mepA           | 45C | 33.26 | 84.77 | 1.89 |                   |
| mexA           | 45C |       |       |      | NoAmplification   |
| mexD           | 45C |       |       |      | NoAmplification   |
| mexE           | 45C | 31.64 | 83.06 | 1.91 |                   |
| mexF           | 45C | 28.11 | 81.23 | 1.7  | MultipleMeltPeaks |
| mphA-01        | 45C | 27.96 | 89.3  | 2.02 |                   |
| mphA-02        | 45C | 30.19 | 86.73 | 1.76 |                   |
| mphB           | 45C |       |       |      | NoAmplification   |
| mphC           | 45C | 36.42 | 75.13 | 1.84 |                   |
| msrA-01        | 45C | 39.2  | 72.03 | 1.85 |                   |
| msrC-01        | 45C |       |       |      | NoAmplification   |
| mtrC-01        | 45C |       |       |      | NoAmplification   |
| mtrC-02        | 45C | 37.28 | 81.62 | 1.76 |                   |
| mtrD-02        | 45C | 27.77 | 81.28 | 1.87 |                   |
| mtrD-03        | 45C | 32.54 | 81.92 | 1.77 |                   |
| NDM1           | 45C |       |       |      | NoAmplification   |
| nimE           | 45C |       |       |      | NoAmplification   |
| nisB           | 45C |       |       |      | NoAmplification   |
| oleC           | 45C | 36.68 | 83.06 | 1.84 |                   |
| oprD           | 45C | 26.65 | 91.81 | 1.99 |                   |
| oprJ           | 45C | 30.48 | 85.03 | 1.86 |                   |
| pbp            | 45C |       |       |      | NoAmplification   |
| pbp2x          | 45C |       |       |      | NoAmplification   |
| Pbp5           | 45C |       |       |      | NoAmplification   |
| penA           | 45C | 39.47 | 84.09 | 1.6  |                   |
| pikR1          | 45C | 36.96 | 74.51 | 1.97 | MultipleMeltPeaks |
| pikR2          | 45C | 30.26 | 84.73 | 1.74 |                   |
| pmrA           | 45C | 22.15 | 79.66 | 2.07 |                   |
| pncA           | 45C | 26.94 | 89.25 | 1.96 |                   |
| putative multi | 45C |       |       |      | NoAmplification   |
| qac            | 45C |       |       |      | NoAmplification   |
| qacA           | 45C |       |       |      | NoAmplification   |
| qacA/qacB      | 45C |       |       |      | NoAmplification   |
| qacEdelta1-0   | 45C |       |       |      | NoAmplification   |
| qacEdelta1-0   | 45C | 32.3  | 87.36 | 1.75 |                   |
| qacH-01        | 45C | 32.94 | 86.4  | 1.78 |                   |
| qacH-02        | 45C | 33.33 | 83.88 | 1.64 |                   |
| qnrA           | 45C |       |       |      | NoAmplification   |

|              |     |       |       |      |                   |
|--------------|-----|-------|-------|------|-------------------|
| rarD-02      | 45C | 32.94 | 85.64 | 1.91 |                   |
| sat4         | 45C |       |       |      | NoAmplification   |
| sdeB         | 45C |       |       |      | NoAmplification   |
| spcN-01      | 45C |       |       |      | NoAmplification   |
| speA         | 45C |       |       |      | NoAmplification   |
| str          | 45C |       |       |      | NoAmplification   |
| strA         | 45C |       |       |      | NoAmplification   |
| strB         | 45C | 39.3  | 78.69 | 1.82 |                   |
| sul1         | 45C | 31.78 | 89.59 | 1.94 |                   |
| sul2         | 45C |       |       |      | NoAmplification   |
| sulA/foIP-01 | 45C | 21.29 | 80.81 | 2    |                   |
| sulA/foIP-03 | 45C | 22.24 | 83.2  | 1.95 |                   |
| tet(32)      | 45C | 23.74 | 81.25 | 1.96 |                   |
| tet(34)      | 45C | 34.16 | 75.06 | 1.97 |                   |
| tet(35)      | 45C |       |       |      | NoAmplification   |
| tet(36)-A    | 45C | 36.71 | 81.89 | 1.81 |                   |
| tet(36)-B    | 45C |       |       |      | NoAmplification   |
| tet(37)      | 45C | 26.08 | 76.27 | 2.04 |                   |
| tetA-01      | 45C | 28.92 | 85.07 | 1.92 |                   |
| tetA-02      | 45C | 33.56 | 92.64 | 1.85 | MultipleMeltPeaks |
| tetB-01      | 45C | 24.1  | 79.63 | 1.95 | MultipleMeltPeaks |
| tetB-02      | 45C | 23.77 | 79.71 | 2    |                   |
| tetC-01      | 45C | 24.03 | 75.19 | 1.97 |                   |
| tetC-02      | 45C | 23.88 | 76.08 | 2.09 |                   |
| tetD-01      | 45C |       |       |      | NoAmplification   |
| tetD-02      | 45C | 36.41 | 80.17 | 1.89 |                   |
| tetE         | 45C |       |       |      | NoAmplification   |
| tetG-01      | 45C | 38.59 | 82.02 | 1.84 | MultipleMeltPeaks |
| tetG-02      | 45C | 36.36 | 87.75 | 1.84 |                   |
| tetH         | 45C |       |       |      | NoAmplification   |
| tetJ         | 45C |       |       |      | NoAmplification   |
| tetK         | 45C |       |       |      | NoAmplification   |
| tetL-01      | 45C |       |       |      | NoAmplification   |
| tetL-02      | 45C | 31.56 | 85.18 | 1.86 |                   |
| tetM-01      | 45C | 21.87 | 76.08 | 2    |                   |
| tetM-02      | 45C | 21.71 | 77.64 | 2.06 |                   |
| tetO-01      | 45C | 21.87 | 76.82 | 2.07 |                   |
| tetPA        | 45C |       |       |      | NoAmplification   |
| tetPB-01     | 45C |       |       |      | NoAmplification   |
| tetPB-02     | 45C | 30.54 | 84.75 | 2.05 |                   |
| tetPB-03     | 45C |       |       |      | NoAmplification   |
| tetPB-05     | 45C |       |       |      | NoAmplification   |
| tetQ         | 45C | 21.15 | 77.16 | 2.08 |                   |
| tetR-02      | 45C | 34.08 | 82.35 | 1.81 | MultipleMeltPeaks |
| tetR-03      | 45C | 23.67 | 76.11 | 2    |                   |
| tetS         | 45C | 37.53 | 75.35 | 1.93 |                   |

|             |     |       |       |      |                             |
|-------------|-----|-------|-------|------|-----------------------------|
| tetT        | 45C |       |       |      | NoAmplification             |
| tetU-01     | 45C |       |       |      | NoAmplification             |
| tetV        | 45C |       |       |      | NoAmplification             |
| tetW-01     | 45C | 23.49 | 81.88 | 1.98 |                             |
| tetX        | 45C |       |       |      | BadR2, CtIsSmall, Saturatio |
| tnpA-01     | 45C |       |       |      | NoAmplification             |
| tnpA-02     | 45C | 31.35 | 86.86 | 1.71 |                             |
| tnpA-03     | 45C | 32.33 | 75.06 | 1.99 |                             |
| tnpA-04     | 45C |       |       |      | NoAmplification             |
| tnpA-05     | 45C | 27.7  | 80.76 | 1.87 |                             |
| tnpA-07     | 45C |       |       |      | NoAmplification             |
| tolC-01     | 45C | 37.85 | 80.86 | 1.71 |                             |
| tolC-02     | 45C | 30.01 | 87.6  | 1.97 |                             |
| tolC-03     | 45C | 30.91 | 85.72 | 2.04 |                             |
| Tp614       | 45C | 37.54 | 82.8  | 1.73 | MultipleMeltPeaks           |
| ttgA        | 45C | 35.09 | 87.22 | 1.81 |                             |
| ttgB        | 45C | 35.16 | 78.94 | 1.85 |                             |
| vanA        | 45C |       |       |      | NoAmplification             |
| vanB-01     | 45C | 36.96 | 82.55 | 1.9  |                             |
| vanC-01     | 45C | 40.41 | 76.26 | 1.78 |                             |
| vanC-02     | 45C |       |       |      | NoAmplification             |
| vanC-03     | 45C | 24.37 | 85.98 | 1.95 | MultipleMeltPeaks           |
| vanC1       | 45C |       |       |      | NoAmplification             |
| vanC2/vanC3 | 45C | 32.59 | 85.27 | 1.7  |                             |
| vanG        | 45C |       |       |      | BadR2, LowEfficiency, CtIsS |
| vanHB       | 45C |       |       |      | NoAmplification             |
| vanHD       | 45C |       |       |      | CurveFitFailed              |
| vanRA-01    | 45C |       |       |      | NoAmplification             |
| vanRA-02    | 45C |       |       |      | NoAmplification             |
| vanRB       | 45C | 34.51 | 85.51 | 1.87 |                             |
| vanRC       | 45C |       |       |      | NoAmplification             |
| vanRC4      | 45C |       |       |      | NoAmplification             |
| vanRD       | 45C |       |       |      | NoAmplification             |
| vanSA       | 45C |       |       |      | NoAmplification             |
| vanSB       | 45C | 31.89 | 74.08 | 1.96 |                             |
| vanSC-01    | 45C | 37.02 | 83.98 | 1.9  |                             |
| vanSC-02    | 45C |       |       |      | NoAmplification             |
| vanTC-01    | 45C |       |       |      | NoAmplification             |
| vanTC-02    | 45C |       |       |      | NoAmplification             |
| vanTE       | 45C |       |       |      | NoAmplification             |
| vanTG       | 45C |       |       |      | BadR2, CtIsSmall, Saturatio |
| vanWB       | 45C |       |       |      | NoAmplification             |
| vanWG       | 45C |       |       |      | NoAmplification             |
| vanXA       | 45C |       |       |      | NoAmplification             |
| vanXB       | 45C |       |       |      | NoAmplification             |
| vanXD       | 45C | 34.5  | 74.49 | 1.96 |                             |

|              |     |       |       |      |                   |
|--------------|-----|-------|-------|------|-------------------|
| vanYB        | 45C |       |       |      | NoAmplification   |
| vanYD-01     | 45C | 31.37 | 82.07 | 1.72 |                   |
| vanYD-02     | 45C |       |       |      | NoAmplification   |
| vatB-01      | 45C |       |       |      | NoAmplification   |
| vatB-02      | 45C |       |       |      | NoAmplification   |
| vatC-01      | 45C | 31.16 | 81.3  | 1.88 |                   |
| vatC-02      | 45C | 34.05 | 87.54 | 1.86 |                   |
| vatE-01      | 45C | 31.42 | 75.25 | 2.02 |                   |
| vatE-02      | 45C |       |       |      | NoAmplification   |
| vgaA-01      | 45C |       |       |      | NoAmplification   |
| vgaA-02      | 45C |       |       |      | NoAmplification   |
| vgb-01       | 45C | 37.35 | 74.52 | 1.92 | MultipleMeltPeaks |
| vgbB-01      | 45C |       |       |      | NoAmplification   |
| vgbB-02      | 45C |       |       |      | NoAmplification   |
| yceE/mdtG-0  | 45C |       |       |      | CurveFitFailed    |
| yceE/mdtG-0  | 45C | 35.51 | 80.84 | 1.93 |                   |
| yceL/mdtH-0  | 45C | 31.09 | 84.46 | 1.95 |                   |
| yceL/mdtH-0  | 45C |       |       |      | NoAmplification   |
| yceL/mdtH-0  | 45C | 34.65 | 81.43 | 1.93 | MultipleMeltPeaks |
| yidY/mdtL-01 | 45C | 32.26 | 82.41 | 1.87 | MultipleMeltPeaks |
| yidY/mdtL-02 | 45C |       |       |      | NoAmplification   |































| Assay          | Sample | Ct | Tm    | Efficiency | flag                         |
|----------------|--------|----|-------|------------|------------------------------|
| 16S rRNA       | 46A    |    | 14.69 | 81.9       | 2.09                         |
| aac            | 46A    |    | 28.39 | 81.3       | 2.08 MultipleMeltPeaks       |
| aac(6')-Ib(akz | 46A    |    | 32.83 | 83         | 1.9                          |
| aac(6')-Ib(akz | 46A    |    | 30.34 | 81.79      | 1.95 MultipleMeltPeaks       |
| aac(6')-Ib(akz | 46A    |    | 30.69 | 90.22      | 1.92 MultipleMeltPeaks       |
| aac(6')-II     | 46A    |    | 32.01 | 85.83      | 1.66                         |
| aac(6')I1      | 46A    |    | 41.17 | 64.05      | 1.63 MultipleMeltPeaks       |
| aacA/aphD      | 46A    |    |       |            | LowEfficiency, CtIsSmall, Ci |
| aacC           | 46A    |    | 30.97 | 92.19      | 1.9 MultipleMeltPeaks        |
| aacC1          | 46A    |    |       |            | NoAmplification              |
| aacC2          | 46A    |    |       |            | NoAmplification              |
| aacC4          | 46A    |    | 31.86 | 83.51      | 1.92 MultipleMeltPeaks       |
| aadA-01        | 46A    |    | 34.61 | 87.26      | 1.88                         |
| aadA-02        | 46A    |    | 30.56 | 80.39      | 1.92                         |
| aadA-1-01      | 46A    |    | 33.27 | 81.54      | 1.92                         |
| aadA-1-02      | 46A    |    |       |            | NoAmplification              |
| aadA1          | 46A    |    | 31.33 | 83.92      | 2.05                         |
| aadA2-01       | 46A    |    | 34.2  | 85.21      | 1.8                          |
| aadA2-02       | 46A    |    | 30.55 | 75.55      | 1.97                         |
| aadA2-03       | 46A    |    |       |            | NoAmplification              |
| aadA5-01       | 46A    |    | 31.15 | 88.51      | 1.91                         |
| aadA5-02       | 46A    |    | 30.23 | 83.19      | 1.96 MultipleMeltPeaks       |
| aadA9-01       | 46A    |    | 31.03 | 81.48      | 1.86 MultipleMeltPeaks       |
| aadA9-02       | 46A    |    | 37.46 | 73.6       | 2.07                         |
| aadD           | 46A    |    |       |            | NoAmplification              |
| aadE           | 46A    |    |       |            | NoAmplification              |
| acrA-01        | 46A    |    | 29.3  | 88.78      | 1.88                         |
| acrA-02        | 46A    |    | 36.63 | 86.84      | 1.8 MultipleMeltPeaks        |
| acrA-03        | 46A    |    |       |            | LowEfficiency, CtIsSmall, Ci |
| acrA-04        | 46A    |    | 28.37 | 84.5       | 1.98                         |
| acrA-05        | 46A    |    | 30.38 | 88.32      | 1.95 MultipleMeltPeaks       |
| acrB-01        | 46A    |    |       |            | NoAmplification              |
| acrF           | 46A    |    | 24.56 | 82.87      | 1.82                         |
| acrR-01        | 46A    |    | 33.14 | 81.1       | 1.95 MultipleMeltPeaks       |
| acrR-02        | 46A    |    | 34.77 | 86.17      | 1.88                         |
| Actin          | 46A    |    | 20.76 | 87.11      | 1.96 MultipleMeltPeaks       |
| adeA           | 46A    |    | 35.13 | 83.57      | 1.93                         |
| ampC-01        | 46A    |    | 31.43 | 84.79      | 1.96                         |
| ampC-02        | 46A    |    | 37.52 | 75.32      | 1.91 MultipleMeltPeaks       |
| ampC-04        | 46A    |    | 29.78 | 79.18      | 1.89                         |
| ampC-05        | 46A    |    |       |            | NoAmplification              |
| ampC-06        | 46A    |    | 34.11 | 80.52      | 1.92                         |
| ampC-07        | 46A    |    | 31.35 | 88.27      | 1.87                         |
| ampC-09        | 46A    |    | 32.12 | 91.53      | 1.78                         |
| ampC/blaDH     | 46A    |    | 27.42 | 84.44      | 1.97                         |

|                          |     |       |       |      |                              |
|--------------------------|-----|-------|-------|------|------------------------------|
| aph                      | 46A |       |       |      | NoAmplification              |
| aph(2')-Id-01            | 46A |       |       |      | LowEfficiency, CtIsSmall, Ci |
| aph(2')-Id-02            | 46A |       |       |      | LowEfficiency, CtIsSmall, Ci |
| aph6ia                   | 46A |       |       |      | CurveFitFailed               |
| aphA1(aka k <sub>z</sub> | 46A |       |       |      | LowEfficiency, CtIsSmall, Ci |
| bacA-01                  | 46A | 37.82 | 76.81 | 1.8  | MultipleMeltPeaks            |
| bacA-02                  | 46A | 31.23 | 87.97 | 1.82 |                              |
| BETA-globin              | 46A | 22.08 | 83.93 | 2.01 |                              |
| bla-ACC-1                | 46A | 31.17 | 90.29 | 1.92 |                              |
| bla-L1                   | 46A | 28.58 | 85.85 | 1.96 |                              |
| bla1                     | 46A |       |       |      | LowEfficiency, CtIsSmall, Ci |
| blaCMY                   | 46A | 35.1  | 76.47 | 1.86 |                              |
| blaCMY2-01               | 46A | 34.25 | 82.4  | 1.97 | MultipleMeltPeaks            |
| blaCMY2-02               | 46A | 26.16 | 82.61 | 1.95 | MultipleMeltPeaks            |
| blaCTX-M-01              | 46A | 38.47 | 75.67 | 1.68 | MultipleMeltPeaks            |
| blaCTX-M-02              | 46A | 28.51 | 85.11 | 1.92 | MultipleMeltPeaks            |
| blaCTX-M-03              | 46A |       |       |      | LowEfficiency, CtIsSmall, Ci |
| blaCTX-M-04              | 46A | 30.66 | 89.86 | 1.96 | MultipleMeltPeaks            |
| blaCTX-M-05              | 46A | 29.19 | 84.24 | 1.67 |                              |
| blaCTX-M-06              | 46A |       |       |      | NoAmplification              |
| blaGES                   | 46A |       |       |      | NoAmplification              |
| blaIMP-01                | 46A | 34.27 | 74.32 | 1.94 | MultipleMeltPeaks            |
| blaIMP-02                | 46A | 35.82 | 79.45 | 1.91 | MultipleMeltPeaks            |
| blaMOX/blaC              | 46A |       |       |      | CurveFitFailed               |
| blaOCH                   | 46A |       |       |      | NoAmplification              |
| blaOKP                   | 46A |       |       |      | NoAmplification              |
| blaOXA1/blaC             | 46A |       |       |      | NoAmplification              |
| blaOXA10-01              | 46A |       |       |      | LowEfficiency, CtIsSmall, S: |
| blaOXA10-02              | 46A |       |       |      | LowEfficiency, CtIsSmall, Ci |
| blaOXY                   | 46A | 30.73 | 88.39 | 1.8  |                              |
| blaPAO                   | 46A |       |       |      | NoAmplification              |
| blaPER                   | 46A | 35.82 | 70.15 | 1.78 | MultipleMeltPeaks            |
| blaPSE                   | 46A |       |       |      | NoAmplification              |
| blaROB                   | 46A |       |       |      | NoAmplification              |
| blaSFO                   | 46A | 27.6  | 88.84 | 1.93 | MultipleMeltPeaks            |
| blaSHV-01                | 46A | 29.12 | 87.32 | 2.1  | MultipleMeltPeaks            |
| blaSHV-02                | 46A | 35.85 | 81.74 | 1.84 | MultipleMeltPeaks            |
| blaTEM                   | 46A | 27.58 | 79.21 | 2.05 |                              |
| blaTLA                   | 46A |       |       |      | NoAmplification              |
| blaVEB                   | 46A |       |       |      | NoAmplification              |
| blaVIM                   | 46A | 32.25 | 81.83 | 1.92 |                              |
| blaZ                     | 46A |       |       |      | NoAmplification              |
| carB                     | 46A | 36.57 | 82.32 | 1.9  |                              |
| catA1                    | 46A |       |       |      | NoAmplification              |
| catB3                    | 46A | 34.76 | 80.02 | 1.96 |                              |
| catB8                    | 46A | 28.08 | 81.95 | 1.98 | MultipleMeltPeaks            |

|            |     |       |       |      |                              |
|------------|-----|-------|-------|------|------------------------------|
| ceoA       | 46A | 27.49 | 82.08 | 1.92 | MultipleMeltPeaks            |
| cepA       | 46A |       |       |      | NoAmplification              |
| cfiA       | 46A | 31.83 | 87.52 | 1.88 |                              |
| cfr        | 46A |       |       |      | LowEfficiency, CtIsSmall, Ci |
| cfxA       | 46A |       |       |      | LowEfficiency, CtIsSmall, Ci |
| cmeA       | 46A |       |       |      | CurveFitFailed               |
| cmlA1-01   | 46A | 35.23 | 80.17 | 1.84 | MultipleMeltPeaks            |
| cmlA1-02   | 46A | 36.28 | 82.59 | 1.79 |                              |
| cmr        | 46A |       |       |      | LowEfficiency, CtIsSmall, Ci |
| cmx(A)     | 46A | 26.7  | 84.42 | 1.96 | MultipleMeltPeaks            |
| cphA-01    | 46A | 27.63 | 85.47 | 1.97 | MultipleMeltPeaks            |
| cphA-02    | 46A | 31.98 | 86    | 1.94 | MultipleMeltPeaks            |
| dfrA1      | 46A | 37.74 | 83.26 | 1.75 | MultipleMeltPeaks            |
| dfrA12     | 46A | 36.51 | 82.84 | 1.75 | MultipleMeltPeaks            |
| emrD       | 46A | 35.08 | 78.41 | 1.85 | MultipleMeltPeaks            |
| ereA       | 46A | 33.75 | 82.43 | 1.95 |                              |
| ereB       | 46A | 34.97 | 85.78 | 1.87 | MultipleMeltPeaks            |
| erm(34)    | 46A |       |       |      | CurveFitFailed               |
| erm(35)    | 46A |       |       |      | LowEfficiency, CtIsSmall, Ci |
| erm(36)    | 46A | 32.62 | 87.63 | 1.87 |                              |
| ermA       | 46A |       |       |      | LowEfficiency, CtIsSmall, Ci |
| ermA/ermTR | 46A |       |       |      | NoAmplification              |
| ermB       | 46A | 21.34 | 75.11 | 2.12 |                              |
| ermC       | 46A | 36.9  | 82.02 | 1.84 | MultipleMeltPeaks            |
| ermF       | 46A |       |       |      | NoAmplification              |
| ermJ/ermD  | 46A |       |       |      | NoAmplification              |
| ermK-01    | 46A | 37.97 | 80.86 | 1.83 |                              |
| ermK-02    | 46A | 33.41 | 85.85 | 1.77 |                              |
| ermT-01    | 46A |       |       |      | NoAmplification              |
| ermT-02    | 46A | 38.59 | 70.74 | 1.85 | MultipleMeltPeaks            |
| ermX       | 46A | 32.56 | 85.91 | 1.8  |                              |
| ermY       | 46A |       |       |      | NoAmplification              |
| fabK       | 46A | 18.72 | 77.53 | 2.2  |                              |
| floR       | 46A |       |       |      | NoAmplification              |
| folA       | 46A | 36.19 | 80.29 | 1.75 | MultipleMeltPeaks            |
| fosB       | 46A |       |       |      | LowEfficiency, CtIsSmall, S: |
| fosX       | 46A |       |       |      | NoAmplification              |
| fox5       | 46A | 24.86 | 87.33 | 1.98 |                              |
| imiR       | 46A |       |       |      | NoAmplification              |
| ImrA-01    | 46A | 37.74 | 82.44 | 1.83 |                              |
| intl       | 46A | 30.14 | 84.88 | 1.93 | MultipleMeltPeaks            |
| intl1      | 46A | 19.09 | 87.29 | 1.99 |                              |
| IS613      | 46A | 37.12 | 77.18 | 1.88 |                              |
| lnuA-01    | 46A |       |       |      | NoAmplification              |
| lnuB-01    | 46A |       |       |      | NoAmplification              |
| lnuB-02    | 46A |       |       |      | NoAmplification              |

|                |     |       |       |      |                              |
|----------------|-----|-------|-------|------|------------------------------|
| lnuC           | 46A | 35.42 | 86.51 | 1.8  | MultipleMeltPeaks            |
| marR-01        | 46A | 31.83 | 85.3  | 1.89 |                              |
| matA/mel       | 46A | 21.6  | 77.57 | 2.05 |                              |
| mdet1          | 46A | 38.58 | 81.58 | 1.76 |                              |
| mdtA           | 46A | 36.4  | 81.98 | 1.64 |                              |
| mdtE/yhiU      | 46A | 36.86 | 80.78 | 1.83 |                              |
| mecA           | 46A |       |       |      | NoAmplification              |
| mefA           | 46A | 20.73 | 80.39 | 1.99 | MultipleMeltPeaks            |
| mepA           | 46A | 31.03 | 84.56 | 1.98 | MultipleMeltPeaks            |
| mexA           | 46A |       |       |      | CurveFitFailed               |
| mexD           | 46A | 31.8  | 80.25 | 2.02 |                              |
| mexE           | 46A | 37.27 | 82.67 | 1.82 |                              |
| mexF           | 46A | 21.42 | 84.28 | 1.88 | MultipleMeltPeaks            |
| mphA-01        | 46A | 29.67 | 86.81 | 1.99 |                              |
| mphA-02        | 46A | 27.57 | 89.83 | 2.24 |                              |
| mphB           | 46A |       |       |      | CurveFitFailed               |
| mphC           | 46A | 33.34 | 85.46 | 1.87 |                              |
| msrA-01        | 46A |       |       |      | NoAmplification              |
| msrC-01        | 46A |       |       |      | NoAmplification              |
| mtrC-01        | 46A | 38.61 | 79.79 | 1.79 | MultipleMeltPeaks            |
| mtrC-02        | 46A | 29.72 | 84.13 | 1.96 |                              |
| mtrD-02        | 46A | 25.99 | 84.69 | 2.05 |                              |
| mtrD-03        | 46A | 32.03 | 84.36 | 1.89 |                              |
| NDM1           | 46A | 37.69 | 73.5  | 1.72 | MultipleMeltPeaks            |
| nimE           | 46A | 37.67 | 81.47 | 1.82 |                              |
| nisB           | 46A |       |       |      | LowEfficiency, CtIsSmall, Ci |
| oleC           | 46A | 35.6  | 89.41 | 1.88 |                              |
| oprD           | 46A | 27.45 | 85.31 | 2    |                              |
| oprJ           | 46A | 31.38 | 88.32 | 1.94 |                              |
| pbp            | 46A | 37.22 | 81.38 | 1.79 |                              |
| pbp2x          | 46A | 18.82 | 75.49 | 2.16 |                              |
| Pbp5           | 46A |       |       |      | NoAmplification              |
| penA           | 46A |       |       |      | NoAmplification              |
| pikR1          | 46A |       |       |      | CtIsLarge, CurveFitFailed    |
| pikR2          | 46A | 28.23 | 84.81 | 2.07 |                              |
| pmrA           | 46A | 19.12 | 79.97 | 2.11 |                              |
| pncA           | 46A | 27.09 | 87.6  | 1.68 | MultipleMeltPeaks            |
| putative multi | 46A | 31.42 | 84.22 | 1.93 |                              |
| qac            | 46A |       |       |      | CurveFitFailed               |
| qacA           | 46A | 33.93 | 70.71 | 2.03 |                              |
| qacA/qacB      | 46A | 33.79 | 86.61 | 1.55 | MultipleMeltPeaks            |
| qacEdelta1-0   | 46A |       |       |      | NoAmplification              |
| qacEdelta1-0   | 46A | 35.96 | 82.47 | 1.84 | MultipleMeltPeaks            |
| qacH-01        | 46A | 28.39 | 86.04 | 1.95 |                              |
| qacH-02        | 46A | 33.2  | 83.79 | 1.68 | MultipleMeltPeaks            |
| qnrA           | 46A | 35.51 | 86.34 | 1.88 | MultipleMeltPeaks            |



|              |     |       |       |      |                                          |
|--------------|-----|-------|-------|------|------------------------------------------|
| rarD-02      | 46A | 33.26 | 85.73 | 1.91 |                                          |
| sat4         | 46A |       |       |      | NoAmplification                          |
| sdeB         | 46A |       |       |      | NoAmplification                          |
| spcN-01      | 46A |       |       |      | NoAmplification                          |
| speA         | 46A |       |       |      | NoAmplification                          |
| str          | 46A |       |       |      | LowEfficiency, CtIsSmall, Ci             |
| strA         | 46A |       |       |      | LowEfficiency, CtIsSmall, Ci             |
| strB         | 46A | 36.15 | 84.78 | 1.76 | MultipleMeltPeaks                        |
| sul1         | 46A | 30.33 | 89.69 | 1.86 |                                          |
| sul2         | 46A |       |       |      | LowEfficiency, CtIsSmall, Ci             |
| sulA/foIP-01 | 46A | 17.72 | 80.81 | 2.01 |                                          |
| sulA/foIP-03 | 46A | 18.31 | 83.45 | 1.97 |                                          |
| tet(32)      | 46A |       |       |      | NoAmplification                          |
| tet(34)      | 46A | 35.07 | 74.88 | 2.01 |                                          |
| tet(35)      | 46A |       |       |      | NoAmplification                          |
| tet(36)-A    | 46A |       |       |      | NoAmplification                          |
| tet(36)-B    | 46A |       |       |      | CurveFitFailed                           |
| tet(37)      | 46A | 31.92 | 81.38 | 1.89 | MultipleMeltPeaks                        |
| tetA-01      | 46A | 31.05 | 85.03 | 1.9  |                                          |
| tetA-02      | 46A |       |       |      | LowEfficiency, CtIsSmall, S <sub>c</sub> |
| tetB-01      | 46A | 27.06 | 86.26 | 1.98 | MultipleMeltPeaks                        |
| tetB-02      | 46A | 27.3  | 79.61 | 2.01 |                                          |
| tetC-01      | 46A | 29.02 | 75.17 | 2.02 |                                          |
| tetC-02      | 46A | 28.43 | 76.03 | 2.05 |                                          |
| tetD-01      | 46A |       |       |      | LowEfficiency, CtIsSmall, Ci             |
| tetD-02      | 46A | 36.75 | 76.52 | 1.88 |                                          |
| tetE         | 46A |       |       |      | BadR2, LowEfficiency, CtIsS              |
| tetG-01      | 46A | 30.97 | 82.17 | 1.91 | MultipleMeltPeaks                        |
| tetG-02      | 46A | 26.53 | 82.52 | 1.93 |                                          |
| tetH         | 46A |       |       |      | NoAmplification                          |
| tetJ         | 46A |       |       |      | LowEfficiency, CtIsSmall, Ci             |
| tetK         | 46A |       |       |      | LowEfficiency, CtIsSmall, Ci             |
| tetL-01      | 46A | 32.85 | 80.75 | 1.93 |                                          |
| tetL-02      | 46A | 30.86 | 85.19 | 1.81 |                                          |
| tetM-01      | 46A | 20.85 | 76.32 | 2.01 |                                          |
| tetM-02      | 46A | 21.06 | 77.81 | 2.01 |                                          |
| tetO-01      | 46A | 25.08 | 76.94 | 2.03 |                                          |
| tetPA        | 46A |       |       |      | NoAmplification                          |
| tetPB-01     | 46A | 38.01 | 84.28 | 1.72 | MultipleMeltPeaks                        |
| tetPB-02     | 46A | 27.45 | 84.81 | 2.02 |                                          |
| tetPB-03     | 46A |       |       |      | LowEfficiency, CtIsSmall, Ci             |
| tetPB-05     | 46A | 38.48 | 73.63 | 1.81 |                                          |
| tetQ         | 46A |       |       |      | NoAmplification                          |
| tetR-02      | 46A | 29.85 | 89.07 | 1.91 | MultipleMeltPeaks                        |
| tetR-03      | 46A | 28.45 | 76.19 | 2    |                                          |
| tetS         | 46A |       |       |      | NoAmplification                          |

|             |     |       |       |      |                              |
|-------------|-----|-------|-------|------|------------------------------|
| tetT        | 46A |       |       |      | NoAmplification              |
| tetU-01     | 46A |       |       |      | NoAmplification              |
| tetV        | 46A |       |       |      | CurveFitFailed               |
| tetW-01     | 46A | 28.96 | 81.48 | 1.99 |                              |
| tetX        | 46A |       |       |      | LowEfficiency, CtIsSmall, Ci |
| tnpA-01     | 46A |       |       |      | BadR2, CtIsSmall, Saturatio  |
| tnpA-02     | 46A | 34.07 | 85.07 | 1.73 |                              |
| tnpA-03     | 46A | 32.62 | 75.33 | 2.2  |                              |
| tnpA-04     | 46A | 37.45 | 78.37 | 1.85 |                              |
| tnpA-05     | 46A | 29.18 | 80.73 | 1.91 |                              |
| tnpA-07     | 46A |       |       |      | NoAmplification              |
| tolC-01     | 46A |       |       |      | LowEfficiency, CtIsSmall, Ci |
| tolC-02     | 46A | 30.74 | 87.65 | 1.9  | MultipleMeltPeaks            |
| tolC-03     | 46A | 30.91 | 85.97 | 1.9  |                              |
| Tp614       | 46A | 30.45 | 83.46 | 1.89 |                              |
| ttgA        | 46A |       |       |      | CurveFitFailed               |
| ttgB        | 46A | 36.21 | 84.75 | 1.79 | MultipleMeltPeaks            |
| vanA        | 46A |       |       |      | NoAmplification              |
| vanB-01     | 46A | 30.21 | 84.23 | 2.04 |                              |
| vanC-01     | 46A |       |       |      | NoAmplification              |
| vanC-02     | 46A |       |       |      | LowEfficiency, CtIsSmall, Ci |
| vanC-03     | 46A | 24.83 | 86.04 | 1.93 | MultipleMeltPeaks            |
| vanC1       | 46A |       |       |      | NoAmplification              |
| vanC2/vanC3 | 46A | 32.08 | 84.68 | 2.11 | MultipleMeltPeaks            |
| vanG        | 46A |       |       |      | CurveFitFailed               |
| vanHB       | 46A | 35.42 | 80.25 | 1.87 |                              |
| vanHD       | 46A | 32.7  | 82.38 | 1.91 |                              |
| vanRA-01    | 46A |       |       |      | LowEfficiency, CtIsSmall, Ci |
| vanRA-02    | 46A |       |       |      | CurveFitFailed               |
| vanRB       | 46A | 30.29 | 87.33 | 2.02 |                              |
| vanRC       | 46A |       |       |      | NoAmplification              |
| vanRC4      | 46A |       |       |      | LowEfficiency, CtIsSmall, S: |
| vanRD       | 46A |       |       |      | CurveFitFailed               |
| vanSA       | 46A |       |       |      | NoAmplification              |
| vanSB       | 46A | 29.28 | 74.84 | 1.99 |                              |
| vanSC-01    | 46A | 29.22 | 84.07 | 1.98 |                              |
| vanSC-02    | 46A |       |       |      | NoAmplification              |
| vanTC-01    | 46A |       |       |      | LowEfficiency, CtIsSmall, Ci |
| vanTC-02    | 46A | 33.91 | 86.42 | 1.81 |                              |
| vanTE       | 46A | 32.77 | 88.27 | 1.88 |                              |
| vanTG       | 46A |       |       |      | NoAmplification              |
| vanWB       | 46A |       |       |      | NoAmplification              |
| vanWG       | 46A |       |       |      | LowEfficiency, CtIsSmall, S: |
| vanXA       | 46A | 36.63 | 74.75 | 1.82 |                              |
| vanXB       | 46A |       |       |      | NoAmplification              |
| vanXD       | 46A | 29.81 | 75.93 | 2.01 |                              |

|              |     |       |       |                               |
|--------------|-----|-------|-------|-------------------------------|
| vanYB        | 46A | 36.71 | 85.46 | 1.95 MultipleMeltPeaks        |
| vanYD-01     | 46A | 31.3  | 82.51 | 1.78                          |
| vanYD-02     | 46A | 40.75 | 79.83 | 1.88 BadR2, MultipleMeltPeaks |
| vatB-01      | 46A | 35.17 | 74.96 | 1.9                           |
| vatB-02      | 46A | 33.92 | 86.14 | 1.87                          |
| vatC-01      | 46A | 35.53 | 81.13 | 1.86                          |
| vatC-02      | 46A | 33.89 | 87.36 | 1.85                          |
| vatE-01      | 46A | 30.51 | 77.49 | 2.04                          |
| vatE-02      | 46A | 38.49 | 75.49 | 1.87                          |
| vgaA-01      | 46A | 39.22 | 78.98 | 1.73                          |
| vgaA-02      | 46A |       |       | CurveFitFailed                |
| vgb-01       | 46A | 38.2  | 74.87 | 1.8 MultipleMeltPeaks         |
| vgbB-01      | 46A | 40.78 | 76.07 | 1.62 MultipleMeltPeaks        |
| vgbB-02      | 46A |       |       | NoAmplification               |
| yceE/mdtG-0  | 46A | 37.7  | 77.52 | 1.81 MultipleMeltPeaks        |
| yceE/mdtG-0  | 46A | 40.55 | 81.1  | 1.68                          |
| yceL/mdtH-0  | 46A | 28.17 | 84.93 | 1.97                          |
| yceL/mdtH-0  | 46A |       |       | NoAmplification               |
| yceL/mdtH-0  | 46A | 34.37 | 88.75 | 1.86 MultipleMeltPeaks        |
| yidY/mdtL-01 | 46A | 28.46 | 82.69 | 1.98 MultipleMeltPeaks        |
| yidY/mdtL-02 | 46A |       |       | NoAmplification               |































| Assay           | Sample | Ct | Tm    | Efficiency | flag                   |
|-----------------|--------|----|-------|------------|------------------------|
| 16S rRNA        | 46B    |    | 17.62 | 81.9       | 2.02                   |
| aac             | 46B    |    | 29.39 | 86.68      | 1.84 MultipleMeltPeaks |
| aac(6')-Ib(akz) | 46B    |    |       |            | NoAmplification        |
| aac(6')-Ib(akz) | 46B    |    | 29.86 | 86.08      | 2.03                   |
| aac(6')-Ib(akz) | 46B    |    | 31.39 | 90.64      | 1.86 MultipleMeltPeaks |
| aac(6')-II      | 46B    |    | 32.46 | 84.15      | 1.81 MultipleMeltPeaks |
| aac(6')I1       | 46B    |    |       |            | CurveFitFailed         |
| aacA/aphD       | 46B    |    |       |            | NoAmplification        |
| aacC            | 46B    |    | 30.26 | 92.07      | 1.99                   |
| aacC1           | 46B    |    |       |            | NoAmplification        |
| aacC2           | 46B    |    |       |            | NoAmplification        |
| aacC4           | 46B    |    | 32.19 | 83.5       | 1.91 MultipleMeltPeaks |
| aadA-01         | 46B    |    |       |            | NoAmplification        |
| aadA-02         | 46B    |    |       |            | CurveFitFailed         |
| aadA-1-01       | 46B    |    | 32.67 | 81.3       | 1.98 MultipleMeltPeaks |
| aadA-1-02       | 46B    |    |       |            | NoAmplification        |
| aadA1           | 46B    |    | 30.46 | 84.41      | 2.27                   |
| aadA2-01        | 46B    |    |       |            | CurveFitFailed         |
| aadA2-02        | 46B    |    | 29.58 | 75.25      | 1.97                   |
| aadA2-03        | 46B    |    | 31.01 | 80.54      | 1.87                   |
| aadA5-01        | 46B    |    | 33.81 | 88.64      | 2                      |
| aadA5-02        | 46B    |    | 31.7  | 88.67      | 1.86                   |
| aadA9-01        | 46B    |    | 34.23 | 88.6       | 1.92                   |
| aadA9-02        | 46B    |    |       |            | NoAmplification        |
| aadD            | 46B    |    |       |            | NoAmplification        |
| aadE            | 46B    |    |       |            | NoAmplification        |
| acrA-01         | 46B    |    | 30.17 | 88.8       | 1.94                   |
| acrA-02         | 46B    |    |       |            | NoAmplification        |
| acrA-03         | 46B    |    | 32.61 | 77.84      | 1.83 MultipleMeltPeaks |
| acrA-04         | 46B    |    | 29.56 | 80.52      | 1.88                   |
| acrA-05         | 46B    |    | 32.22 | 87.99      | 1.94                   |
| acrB-01         | 46B    |    |       |            | NoAmplification        |
| acrF            | 46B    |    | 25.12 | 82.98      | 1.78 MultipleMeltPeaks |
| acrR-01         | 46B    |    | 34.46 | 80.93      | 2.08 MultipleMeltPeaks |
| acrR-02         | 46B    |    | 33.19 | 85.37      | 1.99 MultipleMeltPeaks |
| Actin           | 46B    |    | 18.94 | 87.14      | 1.97                   |
| adeA            | 46B    |    |       |            | NoAmplification        |
| ampC-01         | 46B    |    | 32.22 | 85.19      | 1.93                   |
| ampC-02         | 46B    |    |       |            | NoAmplification        |
| ampC-04         | 46B    |    | 30.35 | 79.09      | 1.62 MultipleMeltPeaks |
| ampC-05         | 46B    |    |       |            | NoAmplification        |
| ampC-06         | 46B    |    |       |            | CurveFitFailed         |
| ampC-07         | 46B    |    | 33.96 | 88.29      | 1.96                   |
| ampC-09         | 46B    |    |       |            | NoAmplification        |
| ampC/blaDH      | 46B    |    | 28.44 | 87.53      | 2.06                   |

|                          |     |       |       |      |                              |
|--------------------------|-----|-------|-------|------|------------------------------|
| aph                      | 46B |       |       |      | NoAmplification              |
| aph(2')-Id-01            | 46B |       |       |      | NoAmplification              |
| aph(2')-Id-02            | 46B |       |       |      | NoAmplification              |
| aph6ia                   | 46B |       |       |      | NoAmplification              |
| aphA1(aka k <sub>z</sub> | 46B |       |       |      | CurveFitFailed               |
| bacA-01                  | 46B |       |       |      | NoAmplification              |
| bacA-02                  | 46B | 33.57 | 87.91 | 1.86 |                              |
| BETA-globin              | 46B | 19.9  | 84.06 | 2.09 |                              |
| bla-ACC-1                | 46B | 33.18 | 88.7  | 2.13 | MultipleMeltPeaks            |
| bla-L1                   | 46B | 27.75 | 85.86 | 2.23 | MultipleMeltPeaks            |
| bla1                     | 46B |       |       |      | NoAmplification              |
| blaCMY                   | 46B |       |       |      | BadR2, LowEfficiency, CtIsS  |
| blaCMY2-01               | 46B | 35.73 | 86.48 | 1.93 |                              |
| blaCMY2-02               | 46B | 26.73 | 84.66 | 2.13 | MultipleMeltPeaks            |
| blaCTX-M-01              | 46B |       |       |      | NoAmplification              |
| blaCTX-M-02              | 46B | 30.47 | 85.63 | 1.88 |                              |
| blaCTX-M-03              | 46B |       |       |      | NoAmplification              |
| blaCTX-M-04              | 46B | 34.76 | 87.88 | 1.95 |                              |
| blaCTX-M-05              | 46B |       |       |      | NoAmplification              |
| blaCTX-M-06              | 46B |       |       |      | NoAmplification              |
| blaGES                   | 46B |       |       |      | NoAmplification              |
| blaIMP-01                | 46B |       |       |      | NoAmplification              |
| blaIMP-02                | 46B |       |       |      | NoAmplification              |
| blaMOX/blaC              | 46B | 33.61 | 82.07 | 1.96 | MultipleMeltPeaks            |
| blaOCH                   | 46B |       |       |      | NoAmplification              |
| blaOKP                   | 46B |       |       |      | NoAmplification              |
| blaOXA1/blaC             | 46B |       |       |      | NoAmplification              |
| blaOXA10-01              | 46B |       |       |      | NoAmplification              |
| blaOXA10-02              | 46B |       |       |      | NoAmplification              |
| blaOXY                   | 46B |       |       |      | LowEfficiency, CtIsSmall, Ci |
| blaPAO                   | 46B |       |       |      | NoAmplification              |
| blaPER                   | 46B | 32.98 | 83.6  | 1.94 |                              |
| blaPSE                   | 46B |       |       |      | NoAmplification              |
| blaROB                   | 46B |       |       |      | NoAmplification              |
| blaSFO                   | 46B | 30.31 | 89.61 | 1.97 |                              |
| blaSHV-01                | 46B |       |       |      | NoAmplification              |
| blaSHV-02                | 46B |       |       |      | CurveFitFailed               |
| blaTEM                   | 46B |       |       |      | NoAmplification              |
| blaTLA                   | 46B |       |       |      | NoAmplification              |
| blaVEB                   | 46B |       |       |      | NoAmplification              |
| blaVIM                   | 46B |       |       |      | NoAmplification              |
| blaZ                     | 46B |       |       |      | NoAmplification              |
| carB                     | 46B |       |       |      | CurveFitFailed               |
| catA1                    | 46B |       |       |      | NoAmplification              |
| catB3                    | 46B | 34.12 | 87.52 | 2.06 |                              |
| catB8                    | 46B | 29.38 | 84.21 | 2.01 | MultipleMeltPeaks            |

|            |     |       |       |      |                              |
|------------|-----|-------|-------|------|------------------------------|
| ceoA       | 46B | 28.16 | 86.41 | 2.07 | MultipleMeltPeaks            |
| cepA       | 46B |       |       |      | NoAmplification              |
| cfiA       | 46B | 30.74 | 84.57 | 1.85 | MultipleMeltPeaks            |
| cfr        | 46B |       |       |      | NoAmplification              |
| cfxA       | 46B | 30.39 | 77.17 | 1.89 |                              |
| cmeA       | 46B |       |       |      | BadR2, CtlSSmall, Saturatio  |
| cmlA1-01   | 46B |       |       |      | NoAmplification              |
| cmlA1-02   | 46B |       |       |      | NoAmplification              |
| cmr        | 46B | 34.97 | 78.38 | 2    |                              |
| cmx(A)     | 46B | 28.02 | 89.6  | 1.98 | MultipleMeltPeaks            |
| cphA-01    | 46B | 30.38 | 85.53 | 1.85 | MultipleMeltPeaks            |
| cphA-02    | 46B | 33.58 | 82.35 | 2.05 |                              |
| dfrA1      | 46B |       |       |      | CurveFitFailed               |
| dfrA12     | 46B |       |       |      | CurveFitFailed               |
| emrD       | 46B |       |       |      | NoAmplification              |
| ereA       | 46B | 33.68 | 82.29 | 2.01 |                              |
| ereB       | 46B | 34.96 | 84.79 | 2.02 | MultipleMeltPeaks            |
| erm(34)    | 46B |       |       |      | NoAmplification              |
| erm(35)    | 46B |       |       |      | CurveFitFailed               |
| erm(36)    | 46B | 31.63 | 87.52 | 2.12 |                              |
| ermA       | 46B |       |       |      | NoAmplification              |
| ermA/ermTR | 46B |       |       |      | NoAmplification              |
| ermB       | 46B | 26.57 | 74.68 | 2.07 |                              |
| ermC       | 46B |       |       |      | NoAmplification              |
| ermF       | 46B |       |       |      | NoAmplification              |
| ermJ/ermD  | 46B |       |       |      | NoAmplification              |
| ermK-01    | 46B | 32.35 | 82.84 | 1.98 |                              |
| ermK-02    | 46B | 34.42 | 85.79 | 1.79 |                              |
| ermT-01    | 46B |       |       |      | NoAmplification              |
| ermT-02    | 46B |       |       |      | NoAmplification              |
| ermX       | 46B | 32.07 | 87.57 | 1.88 |                              |
| ermY       | 46B |       |       |      | NoAmplification              |
| fabK       | 46B | 19.44 | 77.23 | 2.24 |                              |
| floR       | 46B |       |       |      | NoAmplification              |
| folA       | 46B |       |       |      | NoAmplification              |
| fosB       | 46B |       |       |      | LowEfficiency, CtlSSmall, Ci |
| fosX       | 46B |       |       |      | NoAmplification              |
| fox5       | 46B | 24.98 | 87.49 | 2.11 |                              |
| imiR       | 46B |       |       |      | NoAmplification              |
| ImrA-01    | 46B |       |       |      | NoAmplification              |
| intl       | 46B | 29.47 | 84.87 | 1.96 | MultipleMeltPeaks            |
| intl1      | 46B | 19.5  | 87.61 | 2.28 |                              |
| IS613      | 46B | 30.85 | 79.55 | 1.83 |                              |
| lnuA-01    | 46B |       |       |      | NoAmplification              |
| lnuB-01    | 46B |       |       |      | NoAmplification              |
| lnuB-02    | 46B |       |       |      | NoAmplification              |

|                |     |       |       |      |                             |
|----------------|-----|-------|-------|------|-----------------------------|
| lnuC           | 46B | 35.18 | 84.79 | 1.81 |                             |
| marR-01        | 46B | 31.36 | 85.3  | 1.79 |                             |
| matA/mel       | 46B | 23.9  | 77.21 | 2.08 |                             |
| mdet1          | 46B |       |       |      | NoAmplification             |
| mdtA           | 46B |       |       |      | NoAmplification             |
| mdtE/yhiU      | 46B |       |       |      | NoAmplification             |
| mecA           | 46B |       |       |      | NoAmplification             |
| mefA           | 46B | 23.9  | 80.31 | 1.98 |                             |
| mepA           | 46B | 32.01 | 87.16 | 2.01 |                             |
| mexA           | 46B | 34.57 | 85.98 | 1.94 |                             |
| mexD           | 46B | 33.38 | 79.98 | 2.13 |                             |
| mexE           | 46B | 33.09 | 87.13 | 1.88 |                             |
| mexF           | 46B | 27.55 | 87.48 | 2.41 |                             |
| mphA-01        | 46B | 30.84 | 86.85 | 1.87 |                             |
| mphA-02        | 46B | 28.93 | 86.73 | 2.16 | SaturationBaselineRatiosL   |
| mphB           | 46B |       |       |      | NoAmplification             |
| mphC           | 46B |       |       |      | NoAmplification             |
| msrA-01        | 46B |       |       |      | NoAmplification             |
| msrC-01        | 46B |       |       |      | NoAmplification             |
| mtrC-01        | 46B |       |       |      | LowEfficiency, CtIsSmall, C |
| mtrC-02        | 46B | 32.4  | 85.01 | 2.09 |                             |
| mtrD-02        | 46B | 26.26 | 84.67 | 1.87 | MultipleMeltPeaks           |
| mtrD-03        | 46B | 35.75 | 87.11 | 1.88 |                             |
| NDM1           | 46B |       |       |      | NoAmplification             |
| nimE           | 46B |       |       |      | NoAmplification             |
| nisB           | 46B |       |       |      | NoAmplification             |
| oleC           | 46B | 33.99 | 89.45 | 1.89 |                             |
| oprD           | 46B | 27.79 | 86.64 | 2.17 | MultipleMeltPeaks           |
| oprJ           | 46B |       |       |      | NoAmplification             |
| pbp            | 46B | 35.27 | 79.55 | 1.95 |                             |
| pbp2x          | 46B | 19.66 | 75.54 | 2.05 | SaturationBaselineRatiosL   |
| Pbp5           | 46B |       |       |      | NoAmplification             |
| penA           | 46B | 35.33 | 87.43 | 1.86 |                             |
| pikR1          | 46B |       |       |      | NoAmplification             |
| pikR2          | 46B | 29    | 84.81 | 2.43 |                             |
| pmrA           | 46B | 20.14 | 79.94 | 2.15 |                             |
| pncA           | 46B | 30.06 | 89.14 | 1.72 | MultipleMeltPeaks           |
| putative multi | 46B |       |       |      | NoAmplification             |
| qac            | 46B |       |       |      | NoAmplification             |
| qacA           | 46B |       |       |      | NoAmplification             |
| qacA/qacB      | 46B |       |       |      | LowEfficiency, CtIsSmall, S |
| qacEdelta1-0   | 46B |       |       |      | NoAmplification             |
| qacEdelta1-0   | 46B | 30.71 | 77.77 | 1.76 |                             |
| qacH-01        | 46B | 31.15 | 86.26 | 1.99 | MultipleMeltPeaks           |
| qacH-02        | 46B | 32.66 | 83.92 | 1.85 |                             |
| qnrA           | 46B | 34.68 | 84.33 | 2.03 |                             |

|              |     |       |       |      |                             |
|--------------|-----|-------|-------|------|-----------------------------|
| rarD-02      | 46B | 35.65 | 85.8  | 1.99 |                             |
| sat4         | 46B |       |       |      | NoAmplification             |
| sdeB         | 46B |       |       |      | NoAmplification             |
| spcN-01      | 46B |       |       |      | NoAmplification             |
| speA         | 46B |       |       |      | NoAmplification             |
| str          | 46B |       |       |      | NoAmplification             |
| strA         | 46B |       |       |      | NoAmplification             |
| strB         | 46B | 34.78 | 78.73 | 1.95 | MultipleMeltPeaks           |
| sul1         | 46B | 31.11 | 89.6  | 1.87 |                             |
| sul2         | 46B |       |       |      | NoAmplification             |
| sulA/foIP-01 | 46B | 18.8  | 81.12 | 2.02 |                             |
| sulA/foIP-03 | 46B | 19.4  | 83.61 | 1.94 |                             |
| tet(32)      | 46B | 31.28 | 80.81 | 1.85 |                             |
| tet(34)      | 46B | 32.38 | 80.68 | 1.93 |                             |
| tet(35)      | 46B |       |       |      | NoAmplification             |
| tet(36)-A    | 46B |       |       |      | NoAmplification             |
| tet(36)-B    | 46B |       |       |      | NoAmplification             |
| tet(37)      | 46B | 30.01 | 79.9  | 1.9  | MultipleMeltPeaks           |
| tetA-01      | 46B |       |       |      | BadR2, CtlsSmall, CurveFitf |
| tetA-02      | 46B |       |       |      | NoAmplification             |
| tetB-01      | 46B | 31.95 | 86.03 | 1.97 |                             |
| tetB-02      | 46B |       |       |      | NoAmplification             |
| tetC-01      | 46B |       |       |      | NoAmplification             |
| tetC-02      | 46B | 29.62 | 75.61 | 1.99 |                             |
| tetD-01      | 46B |       |       |      | NoAmplification             |
| tetD-02      | 46B | 34.57 | 76.63 | 2.06 |                             |
| tetE         | 46B |       |       |      | NoAmplification             |
| tetG-01      | 46B | 32.77 | 85.49 | 2.15 | MultipleMeltPeaks           |
| tetG-02      | 46B |       |       |      | NoAmplification             |
| tetH         | 46B |       |       |      | NoAmplification             |
| tetJ         | 46B |       |       |      | NoAmplification             |
| tetK         | 46B |       |       |      | NoAmplification             |
| tetL-01      | 46B |       |       |      | CurveFitFailed              |
| tetL-02      | 46B | 30.76 | 85.19 | 1.78 |                             |
| tetM-01      | 46B | 25.94 | 75.66 | 1.93 |                             |
| tetM-02      | 46B | 25.94 | 77.52 | 2.08 |                             |
| tetO-01      | 46B | 26.64 | 76.54 | 2.02 |                             |
| tetPA        | 46B |       |       |      | NoAmplification             |
| tetPB-01     | 46B |       |       |      | NoAmplification             |
| tetPB-02     | 46B | 27.59 | 84.83 | 2.08 |                             |
| tetPB-03     | 46B |       |       |      | NoAmplification             |
| tetPB-05     | 46B |       |       |      | NoAmplification             |
| tetQ         | 46B |       |       |      | NoAmplification             |
| tetR-02      | 46B | 31.06 | 90.33 | 1.72 |                             |
| tetR-03      | 46B |       |       |      | NoAmplification             |
| tetS         | 46B |       |       |      | NoAmplification             |

|             |     |       |       |      |                             |
|-------------|-----|-------|-------|------|-----------------------------|
| tetT        | 46B |       |       |      | NoAmplification             |
| tetU-01     | 46B |       |       |      | NoAmplification             |
| tetV        | 46B |       |       |      | NoAmplification             |
| tetW-01     | 46B | 28.74 | 81.5  | 2.01 |                             |
| tetX        | 46B |       |       |      | CurveFitFailed              |
| tnpA-01     | 46B |       |       |      | NoAmplification             |
| tnpA-02     | 46B |       |       |      | CurveFitFailed              |
| tnpA-03     | 46B | 32.28 | 74.9  | 1.95 |                             |
| tnpA-04     | 46B |       |       |      | NoAmplification             |
| tnpA-05     | 46B | 35.47 | 82.48 | 1.82 |                             |
| tnpA-07     | 46B |       |       |      | NoAmplification             |
| tolC-01     | 46B |       |       |      | NoAmplification             |
| tolC-02     | 46B | 30.43 | 87.83 | 2    | MultipleMeltPeaks           |
| tolC-03     | 46B | 30.65 | 85.32 | 2.04 |                             |
| Tp614       | 46B |       |       |      | CurveFitFailed              |
| ttgA        | 46B |       |       |      | NoAmplification             |
| ttgB        | 46B |       |       |      | BadR2, CtIsSmall, Saturatio |
| vanA        | 46B |       |       |      | NoAmplification             |
| vanB-01     | 46B | 31.68 | 85.18 | 2.28 |                             |
| vanC-01     | 46B |       |       |      | NoAmplification             |
| vanC-02     | 46B |       |       |      | NoAmplification             |
| vanC-03     | 46B | 24.56 | 85.72 | 2.13 | MultipleMeltPeaks           |
| vanC1       | 46B |       |       |      | NoAmplification             |
| vanC2/vanC3 | 46B |       |       |      | CurveFitFailed              |
| vanG        | 46B |       |       |      | NoAmplification             |
| vanHB       | 46B | 34.03 | 78.87 | 1.97 |                             |
| vanHD       | 46B | 33.07 | 86.28 | 1.83 | MultipleMeltPeaks           |
| vanRA-01    | 46B |       |       |      | NoAmplification             |
| vanRA-02    | 46B |       |       |      | NoAmplification             |
| vanRB       | 46B | 30.23 | 87.54 | 1.94 |                             |
| vanRC       | 46B |       |       |      | NoAmplification             |
| vanRC4      | 46B |       |       |      | NoAmplification             |
| vanRD       | 46B |       |       |      | BadR2, CtIsSmall, Saturatio |
| vanSA       | 46B |       |       |      | NoAmplification             |
| vanSB       | 46B |       |       |      | NoAmplification             |
| vanSC-01    | 46B | 33.08 | 84.05 | 2.04 |                             |
| vanSC-02    | 46B |       |       |      | NoAmplification             |
| vanTC-01    | 46B |       |       |      | NoAmplification             |
| vanTC-02    | 46B | 34.18 | 81.48 | 2    |                             |
| vanTE       | 46B | 33.21 | 88.26 | 1.95 |                             |
| vanTG       | 46B |       |       |      | BadR2, CtIsSmall, Saturatio |
| vanWB       | 46B |       |       |      | NoAmplification             |
| vanWG       | 46B |       |       |      | NoAmplification             |
| vanXA       | 46B |       |       |      | NoAmplification             |
| vanXB       | 46B |       |       |      | NoAmplification             |
| vanXD       | 46B | 33.03 | 75.09 | 1.95 | MultipleMeltPeaks           |

|              |     |       |       |      |                   |
|--------------|-----|-------|-------|------|-------------------|
| vanYB        | 46B | 35.26 | 85.06 | 2.04 |                   |
| vanYD-01     | 46B | 31.41 | 82.33 | 1.59 | MultipleMeltPeaks |
| vanYD-02     | 46B |       |       |      | NoAmplification   |
| vatB-01      | 46B |       |       |      | NoAmplification   |
| vatB-02      | 46B |       |       |      | NoAmplification   |
| vatC-01      | 46B | 33.04 | 81.25 | 1.89 |                   |
| vatC-02      | 46B | 34.51 | 87.35 | 2    |                   |
| vatE-01      | 46B | 30.15 | 75.79 | 2.07 |                   |
| vatE-02      | 46B |       |       |      | NoAmplification   |
| vgaA-01      | 46B |       |       |      | NoAmplification   |
| vgaA-02      | 46B | 34.72 | 80.89 | 1.94 |                   |
| vgb-01       | 46B |       |       |      | CurveFitFailed    |
| vgbB-01      | 46B |       |       |      | NoAmplification   |
| vgbB-02      | 46B |       |       |      | NoAmplification   |
| yceE/mdtG-0  | 46B |       |       |      | NoAmplification   |
| yceE/mdtG-0  | 46B |       |       |      | NoAmplification   |
| yceL/mdtH-0  | 46B | 30.1  | 86.01 | 1.95 |                   |
| yceL/mdtH-0  | 46B |       |       |      | NoAmplification   |
| yceL/mdtH-0  | 46B | 33.65 | 81.44 | 2.24 | MultipleMeltPeaks |
| yidY/mdtL-01 | 46B | 30.98 | 88.41 | 1.97 | MultipleMeltPeaks |
| yidY/mdtL-02 | 46B |       |       |      | NoAmplification   |































| Assay          | Sample | Ct | Tm    | Efficiency | flag                           |
|----------------|--------|----|-------|------------|--------------------------------|
| 16S rRNA       | 46C    |    | 18.25 | 81.62      | 2.03                           |
| aac            | 46C    |    | 33.98 | 81.03      | 1.6 MultipleMeltPeaks          |
| aac(6')-Ib(akz | 46C    |    |       |            | NoAmplification                |
| aac(6')-Ib(akz | 46C    |    | 33.71 | 82.76      | 1.92 MultipleMeltPeaks         |
| aac(6')-Ib(akz | 46C    |    | 37.22 | 81.25      | 1.75                           |
| aac(6')-II     | 46C    |    | 34.8  | 83.2       | 1.83                           |
| aac(6')I1      | 46C    |    |       |            | NoAmplification                |
| aacA/aphD      | 46C    |    |       |            | NoAmplification                |
| aacC           | 46C    |    | 32.46 | 89         | 1.84                           |
| aacC1          | 46C    |    |       |            | NoAmplification                |
| aacC2          | 46C    |    |       |            | NoAmplification                |
| aacC4          | 46C    |    | 34.54 | 83.64      | 1.83                           |
| aadA-01        | 46C    |    |       |            | NoAmplification                |
| aadA-02        | 46C    |    |       |            | NoAmplification                |
| aadA-1-01      | 46C    |    |       |            | NoAmplification                |
| aadA-1-02      | 46C    |    | 28.39 | 61.26      | 1.5 SaturationBaselineRatiolsL |
| aadA1          | 46C    |    | 39.68 | 83.5       | 1.73                           |
| aadA2-01       | 46C    |    |       |            | NoAmplification                |
| aadA2-02       | 46C    |    | 32.51 | 75.3       | 2.03                           |
| aadA2-03       | 46C    |    |       |            | NoAmplification                |
| aadA5-01       | 46C    |    |       |            | CurveFitFailed                 |
| aadA5-02       | 46C    |    |       |            | NoAmplification                |
| aadA9-01       | 46C    |    |       |            | CurveFitFailed                 |
| aadA9-02       | 46C    |    |       |            | NoAmplification                |
| aadD           | 46C    |    |       |            | NoAmplification                |
| aadE           | 46C    |    | 38.46 | 73.4       | 1.86                           |
| acrA-01        | 46C    |    | 37.45 | 88.72      | 1.79 MultipleMeltPeaks         |
| acrA-02        | 46C    |    |       |            | NoAmplification                |
| acrA-03        | 46C    |    |       |            | NoAmplification                |
| acrA-04        | 46C    |    | 33.72 | 80.36      | 1.95                           |
| acrA-05        | 46C    |    | 29.63 | 85.61      | 1.88                           |
| acrB-01        | 46C    |    |       |            | NoAmplification                |
| acrF           | 46C    |    | 30.07 | 82.87      | 1.8                            |
| acrR-01        | 46C    |    | 37.35 | 90.79      | 1.73 MultipleMeltPeaks         |
| acrR-02        | 46C    |    |       |            | CurveFitFailed                 |
| Actin          | 46C    |    | 23.22 | 87.14      | 1.95                           |
| adeA           | 46C    |    |       |            | NoAmplification                |
| ampC-01        | 46C    |    | 32.89 | 85.44      | 1.92                           |
| ampC-02        | 46C    |    |       |            | NoAmplification                |
| ampC-04        | 46C    |    | 37.87 | 76.9       | 1.74                           |
| ampC-05        | 46C    |    |       |            | NoAmplification                |
| ampC-06        | 46C    |    |       |            | NoAmplification                |
| ampC-07        | 46C    |    | 36.66 | 88.18      | 1.78                           |
| ampC-09        | 46C    |    |       |            | NoAmplification                |
| ampC/blaDH     | 46C    |    | 30.07 | 84.45      | 1.94                           |

|                          |     |       |       |      |                   |
|--------------------------|-----|-------|-------|------|-------------------|
| aph                      | 46C |       |       |      | NoAmplification   |
| aph(2')-Id-01            | 46C |       |       |      | NoAmplification   |
| aph(2')-Id-02            | 46C |       |       |      | NoAmplification   |
| aph6ia                   | 46C |       |       |      | NoAmplification   |
| aphA1(aka k <sub>z</sub> | 46C |       |       |      | NoAmplification   |
| bacA-01                  | 46C | 39.85 | 84.66 | 1.79 |                   |
| bacA-02                  | 46C |       |       |      | CurveFitFailed    |
| BETA-globin              | 46C | 26.72 | 83.96 | 1.98 |                   |
| bla-ACC-1                | 46C |       |       |      | NoAmplification   |
| bla-L1                   | 46C | 30.36 | 83.89 | 1.9  |                   |
| bla1                     | 46C |       |       |      | NoAmplification   |
| blaCMY                   | 46C | 37.37 | 80.46 | 1.85 |                   |
| blaCMY2-01               | 46C |       |       |      | NoAmplification   |
| blaCMY2-02               | 46C | 30.56 | 84.71 | 1.95 | MultipleMeltPeaks |
| blaCTX-M-01              | 46C |       |       |      | NoAmplification   |
| blaCTX-M-02              | 46C | 37.14 | 79.71 | 1.74 |                   |
| blaCTX-M-03              | 46C |       |       |      | NoAmplification   |
| blaCTX-M-04              | 46C | 40.25 | 62.38 | 1.75 | MultipleMeltPeaks |
| blaCTX-M-05              | 46C |       |       |      | NoAmplification   |
| blaCTX-M-06              | 46C |       |       |      | NoAmplification   |
| blaGES                   | 46C |       |       |      | NoAmplification   |
| blaIMP-01                | 46C |       |       |      | NoAmplification   |
| blaIMP-02                | 46C |       |       |      | NoAmplification   |
| blaMOX/blaC              | 46C |       |       |      | CurveFitFailed    |
| blaOCH                   | 46C |       |       |      | NoAmplification   |
| blaOKP                   | 46C |       |       |      | NoAmplification   |
| blaOXA1/blaC             | 46C |       |       |      | NoAmplification   |
| blaOXA10-01              | 46C |       |       |      | NoAmplification   |
| blaOXA10-02              | 46C |       |       |      | NoAmplification   |
| blaOXY                   | 46C |       |       |      | CurveFitFailed    |
| blaPAO                   | 46C |       |       |      | NoAmplification   |
| blaPER                   | 46C | 36.82 | 78.33 | 1.81 |                   |
| blaPSE                   | 46C |       |       |      | NoAmplification   |
| blaROB                   | 46C |       |       |      | NoAmplification   |
| blaSFO                   | 46C | 37.4  | 80.45 | 1.78 | MultipleMeltPeaks |
| blaSHV-01                | 46C |       |       |      | NoAmplification   |
| blaSHV-02                | 46C |       |       |      | NoAmplification   |
| blaTEM                   | 46C | 26.82 | 79.22 | 2.03 |                   |
| blaTLA                   | 46C |       |       |      | NoAmplification   |
| blaVEB                   | 46C |       |       |      | NoAmplification   |
| blaVIM                   | 46C |       |       |      | NoAmplification   |
| blaZ                     | 46C |       |       |      | NoAmplification   |
| carB                     | 46C |       |       |      | NoAmplification   |
| catA1                    | 46C | 30.58 | 77.06 | 1.94 |                   |
| catB3                    | 46C |       |       |      | CurveFitFailed    |
| catB8                    | 46C | 31.67 | 80.81 | 1.93 |                   |

|            |     |       |       |      |                              |
|------------|-----|-------|-------|------|------------------------------|
| ceoA       | 46C | 30.62 | 82.33 | 1.91 |                              |
| cepA       | 46C |       |       |      | NoAmplification              |
| cfiA       | 46C | 32.21 | 84.69 | 1.91 |                              |
| cfr        | 46C |       |       |      | NoAmplification              |
| cfxA       | 46C | 27.01 | 77.51 | 2.04 |                              |
| cmeA       | 46C | 38.37 | 65.34 | 1.78 | MultipleMeltPeaks            |
| cmlA1-01   | 46C | 37.76 | 80.16 | 1.82 | MultipleMeltPeaks            |
| cmlA1-02   | 46C | 36.21 | 79.9  | 1.93 |                              |
| cmr        | 46C |       |       |      | CurveFitFailed               |
| cmx(A)     | 46C | 30.91 | 85.33 | 1.91 |                              |
| cphA-01    | 46C | 35.85 | 81.17 | 1.86 |                              |
| cphA-02    | 46C |       |       |      | CurveFitFailed               |
| dfrA1      | 46C | 38.03 | 78.63 | 1.93 | MultipleMeltPeaks            |
| dfrA12     | 46C |       |       |      | NoAmplification              |
| emrD       | 46C |       |       |      | NoAmplification              |
| ereA       | 46C | 40.13 | 83.16 | 1.76 |                              |
| ereB       | 46C |       |       |      | NoAmplification              |
| erm(34)    | 46C |       |       |      | NoAmplification              |
| erm(35)    | 46C |       |       |      | NoAmplification              |
| erm(36)    | 46C | 36.25 | 86.45 | 1.79 |                              |
| ermA       | 46C |       |       |      | NoAmplification              |
| ermA/ermTR | 46C |       |       |      | NoAmplification              |
| ermB       | 46C | 22.78 | 75.13 | 2.07 |                              |
| ermC       | 46C |       |       |      | NoAmplification              |
| ermF       | 46C |       |       |      | NoAmplification              |
| ermJ/ermD  | 46C |       |       |      | NoAmplification              |
| ermK-01    | 46C | 30.27 | 75.52 | 2.03 |                              |
| ermK-02    | 46C |       |       |      | CurveFitFailed               |
| ermT-01    | 46C |       |       |      | NoAmplification              |
| ermT-02    | 46C |       |       |      | NoAmplification              |
| ermX       | 46C | 40.18 | 81.95 | 1.61 | MultipleMeltPeaks            |
| ermY       | 46C |       |       |      | NoAmplification              |
| fabK       | 46C | 21.52 | 77.6  | 2.11 |                              |
| floR       | 46C | 33.14 | 83.15 | 1.94 |                              |
| folA       | 46C |       |       |      | NoAmplification              |
| fosB       | 46C |       |       |      | LowEfficiency, CtIsSmall, S: |
| fosX       | 46C |       |       |      | NoAmplification              |
| fox5       | 46C | 35.78 | 85.83 | 1.69 |                              |
| imiR       | 46C |       |       |      | CurveFitFailed               |
| ImrA-01    | 46C |       |       |      | NoAmplification              |
| intl       | 46C | 30.81 | 84.51 | 1.91 |                              |
| intl1      | 46C | 22.02 | 86.8  | 2    |                              |
| IS613      | 46C | 38.84 | 74.6  | 1.79 |                              |
| lnuA-01    | 46C |       |       |      | NoAmplification              |
| lnuB-01    | 46C |       |       |      | NoAmplification              |
| lnuB-02    | 46C |       |       |      | NoAmplification              |

|                |     |       |       |      |                           |
|----------------|-----|-------|-------|------|---------------------------|
| lnuC           | 46C |       |       |      | CurveFitFailed            |
| marR-01        | 46C | 34.45 | 85.3  | 1.88 |                           |
| matA/mel       | 46C | 20.87 | 78.22 | 2.04 |                           |
| mdet1          | 46C |       |       |      | NoAmplification           |
| mdtA           | 46C |       |       |      | NoAmplification           |
| mdtE/yhiU      | 46C |       |       |      | NoAmplification           |
| mecA           | 46C |       |       |      | NoAmplification           |
| mefA           | 46C | 20.36 | 80.49 | 1.95 |                           |
| mepA           | 46C | 37.78 | 84.51 | 1.77 |                           |
| mexA           | 46C |       |       |      | NoAmplification           |
| mexD           | 46C | 35.76 | 79.7  | 1.96 |                           |
| mexE           | 46C |       |       |      | NoAmplification           |
| mexF           | 46C | 31.93 | 81.23 | 2    |                           |
| mphA-01        | 46C | 32.09 | 86.83 | 1.9  |                           |
| mphA-02        | 46C | 34.48 | 84.21 | 2    | MultipleMeltPeaks         |
| mphB           | 46C | 39.22 | 74.87 | 1.82 |                           |
| mphC           | 46C | 33.33 | 80.32 | 1.92 |                           |
| msrA-01        | 46C |       |       |      | NoAmplification           |
| msrC-01        | 46C |       |       |      | NoAmplification           |
| mtrC-01        | 46C |       |       |      | NoAmplification           |
| mtrC-02        | 46C |       |       |      | CtIsLarge, CurveFitFailed |
| mtrD-02        | 46C | 29.82 | 82.65 | 1.99 |                           |
| mtrD-03        | 46C | 34.57 | 85.27 | 1.87 |                           |
| NDM1           | 46C |       |       |      | NoAmplification           |
| nimE           | 46C |       |       |      | NoAmplification           |
| nisB           | 46C |       |       |      | NoAmplification           |
| oleC           | 46C |       |       |      | CurveFitFailed            |
| oprD           | 46C | 29.05 | 82.28 | 1.97 |                           |
| oprJ           | 46C | 36.82 | 91.49 | 1.83 | MultipleMeltPeaks         |
| pbp            | 46C |       |       |      | NoAmplification           |
| pbp2x          | 46C | 19.64 | 75.52 | 2.09 |                           |
| Pbp5           | 46C |       |       |      | NoAmplification           |
| penA           | 46C |       |       |      | NoAmplification           |
| pikR1          | 46C |       |       |      | NoAmplification           |
| pikR2          | 46C | 33.12 | 83.84 | 1.87 |                           |
| pmrA           | 46C | 24.37 | 79.41 | 2.07 |                           |
| pncA           | 46C | 29.67 | 84.63 | 1.85 |                           |
| putative multi | 46C | 33.16 | 84.08 | 1.94 |                           |
| qac            | 46C |       |       |      | CurveFitFailed            |
| qacA           | 46C | 33.61 | 70.45 | 1.86 |                           |
| qacA/qacB      | 46C |       |       |      | NoAmplification           |
| qacEdelta1-0   | 46C |       |       |      | NoAmplification           |
| qacEdelta1-0   | 46C | 41.03 | 74.74 | 1.77 |                           |
| qacH-01        | 46C | 38.04 | 77.61 | 1.74 | MultipleMeltPeaks         |
| qacH-02        | 46C | 37.02 | 83.86 | 1.65 |                           |
| qnrA           | 46C |       |       |      | NoAmplification           |



|              |     |       |       |      |                   |
|--------------|-----|-------|-------|------|-------------------|
| rarD-02      | 46C |       |       |      | NoAmplification   |
| sat4         | 46C |       |       |      | NoAmplification   |
| sdeB         | 46C |       |       |      | NoAmplification   |
| spcN-01      | 46C |       |       |      | NoAmplification   |
| speA         | 46C |       |       |      | NoAmplification   |
| str          | 46C |       |       |      | NoAmplification   |
| strA         | 46C |       |       |      | NoAmplification   |
| strB         | 46C |       |       |      | NoAmplification   |
| sul1         | 46C | 36.54 | 89.75 | 1.69 | MultipleMeltPeaks |
| sul2         | 46C |       |       |      | NoAmplification   |
| sulA/foIP-01 | 46C | 21.35 | 80.84 | 1.97 |                   |
| sulA/foIP-03 | 46C | 20.87 | 82.9  | 1.96 |                   |
| tet(32)      | 46C |       |       |      | NoAmplification   |
| tet(34)      | 46C | 38.16 | 77.51 | 1.92 | MultipleMeltPeaks |
| tet(35)      | 46C |       |       |      | NoAmplification   |
| tet(36)-A    | 46C |       |       |      | NoAmplification   |
| tet(36)-B    | 46C |       |       |      | NoAmplification   |
| tet(37)      | 46C | 36.02 | 82.82 | 1.84 |                   |
| tetA-01      | 46C | 35.86 | 85.01 | 1.79 |                   |
| tetA-02      | 46C |       |       |      | NoAmplification   |
| tetB-01      | 46C | 26.83 | 79.67 | 1.99 |                   |
| tetB-02      | 46C | 28.09 | 79.6  | 1.98 |                   |
| tetC-01      | 46C | 30.11 | 75.22 | 2    |                   |
| tetC-02      | 46C | 27.48 | 76.13 | 2.05 |                   |
| tetD-01      | 46C |       |       |      | NoAmplification   |
| tetD-02      | 46C | 31.42 | 77.83 | 2.02 |                   |
| tetE         | 46C |       |       |      | NoAmplification   |
| tetG-01      | 46C |       |       |      | CurveFitFailed    |
| tetG-02      | 46C | 36.23 | 82.41 | 1.86 |                   |
| tetH         | 46C |       |       |      | NoAmplification   |
| tetJ         | 46C |       |       |      | NoAmplification   |
| tetK         | 46C |       |       |      | NoAmplification   |
| tetL-01      | 46C | 37.4  | 80.82 | 1.68 | MultipleMeltPeaks |
| tetL-02      | 46C | 35.09 | 85.23 | 1.78 |                   |
| tetM-01      | 46C | 20.31 | 76.08 | 1.99 |                   |
| tetM-02      | 46C | 20.26 | 77.76 | 2    |                   |
| tetO-01      | 46C | 29.08 | 76.7  | 2.01 |                   |
| tetPA        | 46C |       |       |      | NoAmplification   |
| tetPB-01     | 46C |       |       |      | NoAmplification   |
| tetPB-02     | 46C | 30.07 | 84.75 | 1.94 |                   |
| tetPB-03     | 46C |       |       |      | NoAmplification   |
| tetPB-05     | 46C | 38.33 | 73.62 | 1.77 |                   |
| tetQ         | 46C | 27.05 | 77.34 | 1.99 |                   |
| tetR-02      | 46C | 40.91 | 62.32 | 1.68 | MultipleMeltPeaks |
| tetR-03      | 46C |       |       |      | NoAmplification   |
| tetS         | 46C |       |       |      | NoAmplification   |

|             |     |       |       |      |                   |
|-------------|-----|-------|-------|------|-------------------|
| tetT        | 46C |       |       |      | NoAmplification   |
| tetU-01     | 46C |       |       |      | NoAmplification   |
| tetV        | 46C |       |       |      | NoAmplification   |
| tetW-01     | 46C | 25.99 | 81.52 | 1.99 |                   |
| tetX        | 46C |       |       |      | NoAmplification   |
| tnpA-01     | 46C |       |       |      | NoAmplification   |
| tnpA-02     | 46C | 39.81 | 84.06 | 1.61 | MultipleMeltPeaks |
| tnpA-03     | 46C | 31.7  | 75.38 | 2.16 |                   |
| tnpA-04     | 46C |       |       |      | NoAmplification   |
| tnpA-05     | 46C | 28.17 | 80.77 | 1.94 |                   |
| tnpA-07     | 46C |       |       |      | NoAmplification   |
| tolC-01     | 46C | 37.69 | 80.46 | 1.92 |                   |
| tolC-02     | 46C | 32.74 | 82.97 | 1.93 |                   |
| tolC-03     | 46C | 32.15 | 85.6  | 1.93 |                   |
| Tp614       | 46C | 37.77 | 74.05 | 1.8  | MultipleMeltPeaks |
| ttgA        | 46C |       |       |      | CurveFitFailed    |
| ttgB        | 46C |       |       |      | NoAmplification   |
| vanA        | 46C |       |       |      | NoAmplification   |
| vanB-01     | 46C |       |       |      | CurveFitFailed    |
| vanC-01     | 46C |       |       |      | NoAmplification   |
| vanC-02     | 46C |       |       |      | NoAmplification   |
| vanC-03     | 46C | 28.21 | 89.65 | 1.89 | MultipleMeltPeaks |
| vanC1       | 46C |       |       |      | NoAmplification   |
| vanC2/vanC3 | 46C | 40.77 | 80.2  | 1.7  | MultipleMeltPeaks |
| vanG        | 46C |       |       |      | CurveFitFailed    |
| vanHB       | 46C |       |       |      | NoAmplification   |
| vanHD       | 46C |       |       |      | NoAmplification   |
| vanRA-01    | 46C |       |       |      | NoAmplification   |
| vanRA-02    | 46C |       |       |      | NoAmplification   |
| vanRB       | 46C | 38.3  | 62.2  | 1.79 | MultipleMeltPeaks |
| vanRC       | 46C |       |       |      | NoAmplification   |
| vanRC4      | 46C |       |       |      | NoAmplification   |
| vanRD       | 46C |       |       |      | NoAmplification   |
| vanSA       | 46C |       |       |      | NoAmplification   |
| vanSB       | 46C | 30.09 | 74.5  | 2.06 |                   |
| vanSC-01    | 46C | 38.2  | 84.03 | 1.94 |                   |
| vanSC-02    | 46C |       |       |      | NoAmplification   |
| vanTC-01    | 46C |       |       |      | NoAmplification   |
| vanTC-02    | 46C |       |       |      | NoAmplification   |
| vanTE       | 46C |       |       |      | CurveFitFailed    |
| vanTG       | 46C |       |       |      | NoAmplification   |
| vanWB       | 46C |       |       |      | NoAmplification   |
| vanWG       | 46C | 38.09 | 74.22 | 1.82 |                   |
| vanXA       | 46C |       |       |      | CurveFitFailed    |
| vanXB       | 46C |       |       |      | NoAmplification   |
| vanXD       | 46C |       |       |      | NoAmplification   |

|              |     |       |       |      |                             |
|--------------|-----|-------|-------|------|-----------------------------|
| vanYB        | 46C | 39.54 | 79.88 | 1.78 | MultipleMeltPeaks           |
| vanYD-01     | 46C | 35.62 | 80.92 | 1.84 | MultipleMeltPeaks           |
| vanYD-02     | 46C | 31.83 | 76.11 | 1.97 |                             |
| vatB-01      | 46C |       |       |      | NoAmplification             |
| vatB-02      | 46C | 32.69 | 84.03 | 1.91 |                             |
| vatC-01      | 46C |       |       |      | NoAmplification             |
| vatC-02      | 46C |       |       |      | NoAmplification             |
| vatE-01      | 46C | 29.52 | 76.51 | 2.14 |                             |
| vatE-02      | 46C | 40.34 | 75.12 | 1.84 |                             |
| vgaA-01      | 46C |       |       |      | CurveFitFailed              |
| vgaA-02      | 46C |       |       |      | NoAmplification             |
| vgb-01       | 46C |       |       |      | BadR2, CtlsLarge, CurveFitl |
| vgbB-01      | 46C |       |       |      | NoAmplification             |
| vgbB-02      | 46C |       |       |      | NoAmplification             |
| yceE/mdtG-0  | 46C | 39.93 | 81.26 | 1.72 |                             |
| yceE/mdtG-0  | 46C |       |       |      | NoAmplification             |
| yceL/mdtH-0  | 46C | 34.58 | 84.46 | 1.82 |                             |
| yceL/mdtH-0  | 46C |       |       |      | NoAmplification             |
| yceL/mdtH-0  | 46C |       |       |      | NoAmplification             |
| yidY/mdtL-01 | 46C | 35.77 | 82.59 | 1.85 |                             |
| yidY/mdtL-02 | 46C |       |       |      | NoAmplification             |































| Assay          | Sample | Ct | Tm    | Efficiency | flag                         |
|----------------|--------|----|-------|------------|------------------------------|
| 16S rRNA       | 47A    |    | 14.26 | 82.3       | 2                            |
| aac            | 47A    |    | 30.6  | 83.22      | 2.01 MultipleMeltPeaks       |
| aac(6')-Ib(akz | 47A    |    | 33.5  | 83.96      | 1.91                         |
| aac(6')-Ib(akz | 47A    |    | 30.82 | 89.16      | 1.92 MultipleMeltPeaks       |
| aac(6')-Ib(akz | 47A    |    | 32.67 | 90.66      | 1.87                         |
| aac(6')-II     | 47A    |    | 32.67 | 87.18      | 1.79 MultipleMeltPeaks       |
| aac(6')I1      | 47A    |    | 33.26 | 91.81      | 1.9                          |
| aacA/aphD      | 47A    |    |       |            | LowEfficiency, CtIsSmall, Ci |
| aacC           | 47A    |    | 28.06 | 89.26      | 1.82 MultipleMeltPeaks       |
| aacC1          | 47A    |    | 29.69 | 81.53      | 1.92                         |
| aacC2          | 47A    |    | 34.47 | 84.63      | 1.92                         |
| aacC4          | 47A    |    | 29.67 | 89.26      | 1.91                         |
| aadA-01        | 47A    |    |       |            | NoAmplification              |
| aadA-02        | 47A    |    | 37.54 | 80.63      | 1.81                         |
| aadA-1-01      | 47A    |    | 27.5  | 80.19      | 1.94                         |
| aadA-1-02      | 47A    |    | 26.23 | 76.49      | 2.01                         |
| aadA1          | 47A    |    | 32.42 | 84.45      | 1.96                         |
| aadA2-01       | 47A    |    | 37.61 | 89.35      | 1.71 MultipleMeltPeaks       |
| aadA2-02       | 47A    |    | 32.01 | 75.46      | 2.04                         |
| aadA2-03       | 47A    |    |       |            | CurveFitFailed               |
| aadA5-01       | 47A    |    | 34.03 | 75.53      | 1.98 MultipleMeltPeaks       |
| aadA5-02       | 47A    |    | 35.53 | 83.58      | 1.89                         |
| aadA9-01       | 47A    |    | 33.4  | 88.24      | 1.76                         |
| aadA9-02       | 47A    |    | 35.92 | 84.2       | 1.74 MultipleMeltPeaks       |
| aadD           | 47A    |    |       |            | NoAmplification              |
| aadE           | 47A    |    | 25.36 | 72.11      | 2.08                         |
| acrA-01        | 47A    |    | 25.08 | 83.06      | 1.97                         |
| acrA-02        | 47A    |    | 32.6  | 87.58      | 1.94                         |
| acrA-03        | 47A    |    | 34.59 | 78.51      | 1.88 MultipleMeltPeaks       |
| acrA-04        | 47A    |    | 27.97 | 83.21      | 1.99 MultipleMeltPeaks       |
| acrA-05        | 47A    |    | 27.09 | 92.25      | 1.9                          |
| acrB-01        | 47A    |    |       |            | NoAmplification              |
| acrF           | 47A    |    | 26.07 | 82.92      | 1.84                         |
| acrR-01        | 47A    |    | 32.33 | 83.68      | 1.95 MultipleMeltPeaks       |
| acrR-02        | 47A    |    | 37    | 83.22      | 1.81                         |
| Actin          | 47A    |    | 22.27 | 87.05      | 1.97                         |
| adeA           | 47A    |    | 40.05 | 62.81      | 1.68 MultipleMeltPeaks       |
| ampC-01        | 47A    |    | 29.93 | 86.22      | 2.02                         |
| ampC-02        | 47A    |    | 37.44 | 84.06      | 1.84                         |
| ampC-04        | 47A    |    | 32.44 | 78.64      | 1.88                         |
| ampC-05        | 47A    |    |       |            | CurveFitFailed               |
| ampC-06        | 47A    |    |       |            | CurveFitFailed               |
| ampC-07        | 47A    |    | 33.67 | 82.83      | 1.9                          |
| ampC-09        | 47A    |    | 34.17 | 87.06      | 1.88                         |
| ampC/blaDH     | 47A    |    | 30.82 | 76.81      | 1.97 MultipleMeltPeaks       |

|                            |     |       |       |      |                                          |
|----------------------------|-----|-------|-------|------|------------------------------------------|
| aph                        | 47A |       |       |      | CurveFitFailed                           |
| aph(2')-Id-01              | 47A |       |       |      | CurveFitFailed                           |
| aph(2')-Id-02              | 47A |       |       |      | CurveFitFailed                           |
| aph6ia                     | 47A | 38.28 | 78.91 | 1.97 |                                          |
| aphA1(aka k <sub>z</sub> ) | 47A | 25.66 | 76.87 | 2.05 |                                          |
| bacA-01                    | 47A | 36.81 | 81.04 | 1.83 | MultipleMeltPeaks                        |
| bacA-02                    | 47A | 33.43 | 80.09 | 2.03 | MultipleMeltPeaks                        |
| BETA-globin                | 47A | 24    | 84.01 | 2.01 |                                          |
| bla-ACC-1                  | 47A | 38.25 | 83.14 | 1.75 | MultipleMeltPeaks                        |
| bla-L1                     | 47A | 32.47 | 84.28 | 2    |                                          |
| bla1                       | 47A |       |       |      | LowEfficiency, CtIsSmall, S <sub>c</sub> |
| blaCMY                     | 47A | 35.41 | 80.27 | 1.89 | MultipleMeltPeaks                        |
| blaCMY2-01                 | 47A | 38.63 | 78.86 | 1.84 | MultipleMeltPeaks                        |
| blaCMY2-02                 | 47A | 28.36 | 85.16 | 1.99 |                                          |
| blaCTX-M-01                | 47A | 34.37 | 79.91 | 1.9  |                                          |
| blaCTX-M-02                | 47A | 31.08 | 79.3  | 1.91 | MultipleMeltPeaks                        |
| blaCTX-M-03                | 47A |       |       |      | CurveFitFailed                           |
| blaCTX-M-04                | 47A | 29.53 | 88    | 1.87 |                                          |
| blaCTX-M-05                | 47A | 33.32 | 76.5  | 1.81 |                                          |
| blaCTX-M-06                | 47A | 34.58 | 82.08 | 1.93 |                                          |
| blaGES                     | 47A |       |       |      | NoAmplification                          |
| blaIMP-01                  | 47A |       |       |      | NoAmplification                          |
| blaIMP-02                  | 47A | 34.55 | 78.31 | 1.92 |                                          |
| blaMOX/blaC                | 47A | 37.46 | 64.86 | 1.7  | MultipleMeltPeaks                        |
| blaOCH                     | 47A |       |       |      | NoAmplification                          |
| blaOKP                     | 47A |       |       |      | NoAmplification                          |
| blaOXA1/blaC               | 47A |       |       |      | LowEfficiency, CtIsSmall, C <sub>i</sub> |
| blaOXA10-01                | 47A |       |       |      | CurveFitFailed                           |
| blaOXA10-02                | 47A |       |       |      | CurveFitFailed                           |
| blaOXY                     | 47A | 35.43 | 88.72 | 1.71 |                                          |
| blaPAO                     | 47A |       |       |      | NoAmplification                          |
| blaPER                     | 47A |       |       |      | CurveFitFailed                           |
| blaPSE                     | 47A |       |       |      | CurveFitFailed                           |
| blaROB                     | 47A | 31.59 | 90    | 1.81 |                                          |
| blaSFO                     | 47A | 30.66 | 91.19 | 1.93 |                                          |
| blaSHV-01                  | 47A | 38.25 | 87.85 | 1.55 | MultipleMeltPeaks                        |
| blaSHV-02                  | 47A |       |       |      | LowEfficiency, CtIsSmall, C <sub>i</sub> |
| blaTEM                     | 47A | 24.58 | 79.52 | 2    |                                          |
| blaTLA                     | 47A |       |       |      | CurveFitFailed                           |
| blaVEB                     | 47A |       |       |      | NoAmplification                          |
| blaVIM                     | 47A | 36.77 | 87.49 | 1.93 |                                          |
| blaZ                       | 47A |       |       |      | NoAmplification                          |
| carB                       | 47A | 30.4  | 82.27 | 1.96 |                                          |
| catA1                      | 47A |       |       |      | NoAmplification                          |
| catB3                      | 47A | 39.68 | 81.23 | 1.79 |                                          |
| catB8                      | 47A | 30.12 | 82.19 | 1.95 |                                          |

|            |     |       |       |      |                              |
|------------|-----|-------|-------|------|------------------------------|
| ceoA       | 47A | 29.34 | 82.32 | 1.92 | MultipleMeltPeaks            |
| cepA       | 47A |       |       |      | NoAmplification              |
| cfiA       | 47A | 33.45 | 64.01 | 2.03 | MultipleMeltPeaks            |
| cfr        | 47A |       |       |      | CurveFitFailed               |
| cfxA       | 47A | 20.9  | 77.69 | 2.08 |                              |
| cmeA       | 47A | 37.52 | 71.83 | 1.79 | MultipleMeltPeaks            |
| cmlA1-01   | 47A | 33.6  | 90.62 | 1.91 | MultipleMeltPeaks            |
| cmlA1-02   | 47A | 30.17 | 92.68 | 1.91 |                              |
| cmr        | 47A |       |       |      | CurveFitFailed               |
| cmx(A)     | 47A | 26.56 | 86.33 | 1.98 | MultipleMeltPeaks            |
| cphA-01    | 47A | 32.47 | 85.39 | 1.91 | MultipleMeltPeaks            |
| cphA-02    | 47A | 31.56 | 82.49 | 1.92 |                              |
| dfrA1      | 47A | 37.81 | 78.8  | 1.88 |                              |
| dfrA12     | 47A | 39.35 | 76.26 | 1.61 | MultipleMeltPeaks            |
| emrD       | 47A | 33    | 88.73 | 1.93 |                              |
| ereA       | 47A |       |       |      | CurveFitFailed               |
| ereB       | 47A | 35.69 | 85.88 | 1.84 | MultipleMeltPeaks            |
| erm(34)    | 47A |       |       |      | CurveFitFailed               |
| erm(35)    | 47A |       |       |      | NoAmplification              |
| erm(36)    | 47A | 30.99 | 85.62 | 2.06 |                              |
| ermA       | 47A |       |       |      | LowEfficiency, CtIsSmall, S: |
| ermA/ermTR | 47A |       |       |      | NoAmplification              |
| ermB       | 47A | 19.83 | 75.16 | 2.12 |                              |
| ermC       | 47A |       |       |      | CurveFitFailed               |
| ermF       | 47A | 27.27 | 74.72 | 1.99 |                              |
| ermJ/ermD  | 47A |       |       |      | LowEfficiency, CtIsSmall, S: |
| ermK-01    | 47A | 38.73 | 88.19 | 1.76 | MultipleMeltPeaks            |
| ermK-02    | 47A | 41.05 | 82.76 | 1.65 | MultipleMeltPeaks            |
| ermT-01    | 47A |       |       |      | CurveFitFailed               |
| ermT-02    | 47A |       |       |      | LowEfficiency, CtIsSmall, C: |
| ermX       | 47A | 37.39 | 84.33 | 1.71 |                              |
| ermY       | 47A |       |       |      | BadR2, LowEfficiency, CtIsS  |
| fabK       | 47A | 19.53 | 79.83 | 2.22 |                              |
| floR       | 47A | 36.13 | 77.6  | 1.79 | MultipleMeltPeaks            |
| folA       | 47A |       |       |      | NoAmplification              |
| fosB       | 47A |       |       |      | LowEfficiency, CtIsSmall, S: |
| fosX       | 47A |       |       |      | NoAmplification              |
| fox5       | 47A | 27.26 | 86.48 | 1.98 |                              |
| imiR       | 47A |       |       |      | CurveFitFailed               |
| lmrA-01    | 47A | 35.54 | 78.88 | 1.95 |                              |
| intl       | 47A | 29.27 | 85.02 | 1.95 |                              |
| intl1      | 47A | 19.77 | 87.32 | 2.01 |                              |
| IS613      | 47A | 20.63 | 79.68 | 2.05 |                              |
| lnuA-01    | 47A |       |       |      | LowEfficiency, CtIsSmall, S: |
| lnuB-01    | 47A |       |       |      | CurveFitFailed               |
| lnuB-02    | 47A |       |       |      | CurveFitFailed               |

|                |     |       |       |      |                              |
|----------------|-----|-------|-------|------|------------------------------|
| lnuC           | 47A | 35.89 | 84.06 | 1.71 |                              |
| marR-01        | 47A | 31.74 | 89.6  | 1.92 |                              |
| matA/mel       | 47A | 17.72 | 77.82 | 2.06 |                              |
| mdet1          | 47A |       |       |      | CurveFitFailed               |
| mdtA           | 47A |       |       |      | CurveFitFailed               |
| mdtE/yhiU      | 47A | 31.56 | 90.59 | 1.74 |                              |
| mecA           | 47A |       |       |      | LowEfficiency, CtIsSmall, Ct |
| mefA           | 47A | 16.95 | 80.52 | 1.99 | MultipleMeltPeaks            |
| mepA           | 47A | 29.08 | 92.34 | 2.04 | MultipleMeltPeaks            |
| mexA           | 47A | 35.52 | 88.3  | 1.82 |                              |
| mexD           | 47A | 33.84 | 80.02 | 2.03 |                              |
| mexE           | 47A | 30.04 | 88.25 | 1.93 |                              |
| mexF           | 47A | 27.34 | 89.21 | 2.07 | MultipleMeltPeaks            |
| mphA-01        | 47A | 29.2  | 89.45 | 1.97 |                              |
| mphA-02        | 47A | 28.69 | 87.09 | 1.93 |                              |
| mphB           | 47A |       |       |      | CurveFitFailed               |
| mphC           | 47A |       |       |      | BadR2, LowEfficiency, CtIsS  |
| msrA-01        | 47A |       |       |      | CurveFitFailed               |
| msrC-01        | 47A |       |       |      | NoAmplification              |
| mtrC-01        | 47A | 37.81 | 83.1  | 1.79 |                              |
| mtrC-02        | 47A | 41.34 | 84.41 | 1.76 | MultipleMeltPeaks            |
| mtrD-02        | 47A | 28.25 | 85.28 | 2.03 | MultipleMeltPeaks            |
| mtrD-03        | 47A | 24.65 | 80.46 | 1.86 | MultipleMeltPeaks            |
| NDM1           | 47A |       |       |      | LowEfficiency, CtIsSmall, S  |
| nimE           | 47A | 38.99 | 75.01 | 1.83 |                              |
| nisB           | 47A | 32.97 | 82.2  | 1.95 |                              |
| oleC           | 47A | 30.18 | 80.73 | 1.9  |                              |
| oprD           | 47A | 28.91 | 87.53 | 1.98 |                              |
| oprJ           | 47A | 29.83 | 91.08 | 1.87 |                              |
| pbp            | 47A |       |       |      | LowEfficiency, CtIsSmall, S  |
| pbp2x          | 47A |       |       |      | NoAmplification              |
| Pbp5           | 47A |       |       |      | LowEfficiency, CtIsSmall, S  |
| penA           | 47A | 31.99 | 85.79 | 1.76 |                              |
| pikR1          | 47A |       |       |      | BadR2, LowEfficiency, CtIsS  |
| pikR2          | 47A | 31.12 | 87.09 | 2    | MultipleMeltPeaks            |
| pmrA           | 47A | 18.59 | 79.93 | 2.08 |                              |
| pncA           | 47A | 26.39 | 89.54 | 1.88 |                              |
| putative multi | 47A | 36.26 | 77.05 | 1.84 | MultipleMeltPeaks            |
| qac            | 47A |       |       |      | CurveFitFailed               |
| qacA           | 47A |       |       |      | NoAmplification              |
| qacA/qacB      | 47A | 36.67 | 87.01 | 1.83 | MultipleMeltPeaks            |
| qacEdelta1-0   | 47A |       |       |      | NoAmplification              |
| qacEdelta1-0   | 47A | 28.85 | 80.08 | 1.99 | MultipleMeltPeaks            |
| qacH-01        | 47A | 30.87 | 87.52 | 1.94 | MultipleMeltPeaks            |
| qacH-02        | 47A | 39.07 | 83.71 | 1.56 |                              |
| qnrA           | 47A | 40.47 | 73.78 | 1.78 | MultipleMeltPeaks            |

|              |     |       |       |      |                              |
|--------------|-----|-------|-------|------|------------------------------|
| rarD-02      | 47A | 36.9  | 82.82 | 1.87 |                              |
| sat4         | 47A | 26.08 | 74.79 | 1.97 | MultipleMeltPeaks            |
| sdeB         | 47A |       |       |      | LowEfficiency, CtIsSmall, S: |
| spcN-01      | 47A |       |       |      | CurveFitFailed               |
| speA         | 47A |       |       |      | NoAmplification              |
| str          | 47A |       |       |      | LowEfficiency, CtIsSmall, Ci |
| strA         | 47A |       |       |      | CurveFitFailed               |
| strB         | 47A | 27.83 | 83.82 | 1.94 |                              |
| sul1         | 47A | 37.45 | 85.86 | 1.76 | MultipleMeltPeaks            |
| sul2         | 47A | 26.82 | 85.92 | 1.98 |                              |
| sulA/foIP-01 | 47A | 16.99 | 81.51 | 2    |                              |
| sulA/foIP-03 | 47A | 17.61 | 83.91 | 2    |                              |
| tet(32)      | 47A | 21.4  | 81.43 | 1.99 |                              |
| tet(34)      | 47A | 37.71 | 74.06 | 1.83 |                              |
| tet(35)      | 47A | 38.61 | 75.45 | 1.82 |                              |
| tet(36)-A    | 47A |       |       |      | NoAmplification              |
| tet(36)-B    | 47A |       |       |      | CurveFitFailed               |
| tet(37)      | 47A | 36.37 | 80.29 | 1.75 |                              |
| tetA-01      | 47A | 31.61 | 85.09 | 1.9  |                              |
| tetA-02      | 47A | 37.85 | 76.21 | 1.76 | MultipleMeltPeaks            |
| tetB-01      | 47A | 26.92 | 79.3  | 1.98 | MultipleMeltPeaks            |
| tetB-02      | 47A | 27.43 | 79.66 | 2    |                              |
| tetC-01      | 47A | 28.33 | 75.33 | 2.03 |                              |
| tetC-02      | 47A | 27.05 | 76.12 | 2.03 |                              |
| tetD-01      | 47A |       |       |      | CurveFitFailed               |
| tetD-02      | 47A | 31.7  | 77.83 | 1.98 |                              |
| tetE         | 47A |       |       |      | NoAmplification              |
| tetG-01      | 47A | 32.76 | 87.19 | 2.06 |                              |
| tetG-02      | 47A | 30.22 | 87.19 | 1.97 |                              |
| tetH         | 47A |       |       |      | NoAmplification              |
| tetJ         | 47A |       |       |      | NoAmplification              |
| tetK         | 47A |       |       |      | LowEfficiency, CtIsSmall, S: |
| tetL-01      | 47A |       |       |      | CurveFitFailed               |
| tetL-02      | 47A | 34.4  | 85.28 | 1.75 |                              |
| tetM-01      | 47A | 18.78 | 75.97 | 2.01 |                              |
| tetM-02      | 47A | 18.88 | 77.52 | 2.02 |                              |
| tetO-01      | 47A |       |       |      | LowEfficiency, CtIsSmall, S: |
| tetPA        | 47A |       |       |      | NoAmplification              |
| tetPB-01     | 47A |       |       |      | CurveFitFailed               |
| tetPB-02     | 47A | 26.75 | 84.54 | 2.03 |                              |
| tetPB-03     | 47A |       |       |      | LowEfficiency, CtIsSmall, S: |
| tetPB-05     | 47A |       |       |      | CurveFitFailed               |
| tetQ         | 47A | 26.21 | 76.01 | 2.02 |                              |
| tetR-02      | 47A | 30.36 | 90.6  | 1.87 | MultipleMeltPeaks            |
| tetR-03      | 47A | 28.16 | 76.1  | 1.99 |                              |
| tetS         | 47A |       |       |      | CurveFitFailed               |

|             |     |       |       |      |                             |
|-------------|-----|-------|-------|------|-----------------------------|
| tetT        | 47A |       |       |      | NoAmplification             |
| tetU-01     | 47A |       |       |      | NoAmplification             |
| tetV        | 47A |       |       |      | NoAmplification             |
| tetW-01     | 47A | 24.68 | 81.92 | 2.01 |                             |
| tetX        | 47A |       |       |      | CurveFitFailed              |
| tnpA-01     | 47A |       |       |      | LowEfficiency, CtIsSmall, S |
| tnpA-02     | 47A | 27.8  | 84.84 | 1.83 |                             |
| tnpA-03     | 47A | 32.37 | 75.22 | 2.11 |                             |
| tnpA-04     | 47A |       |       |      | CurveFitFailed              |
| tnpA-05     | 47A | 24.82 | 80.95 | 1.94 |                             |
| tnpA-07     | 47A |       |       |      | NoAmplification             |
| tolC-01     | 47A | 28.63 | 81.52 | 1.94 |                             |
| tolC-02     | 47A | 31.34 | 84.8  | 1.91 | MultipleMeltPeaks           |
| tolC-03     | 47A | 29.8  | 85.41 | 1.92 |                             |
| Tp614       | 47A | 34.3  | 83.22 | 1.91 |                             |
| ttgA        | 47A | 34.82 | 80.8  | 1.81 |                             |
| ttgB        | 47A | 36.8  | 78.4  | 1.86 | MultipleMeltPeaks           |
| vanA        | 47A |       |       |      | NoAmplification             |
| vanB-01     | 47A | 33.75 | 89.46 | 1.87 | MultipleMeltPeaks           |
| vanC-01     | 47A |       |       |      | CurveFitFailed              |
| vanC-02     | 47A |       |       |      | CurveFitFailed              |
| vanC-03     | 47A | 25.33 | 85.67 | 1.97 | MultipleMeltPeaks           |
| vanC1       | 47A |       |       |      | LowEfficiency, CtIsSmall, C |
| vanC2/vanC3 | 47A | 37.01 | 80.02 | 1.81 |                             |
| vanG        | 47A |       |       |      | CurveFitFailed              |
| vanHB       | 47A | 35.68 | 89.43 | 1.87 | MultipleMeltPeaks           |
| vanHD       | 47A |       |       |      | CurveFitFailed              |
| vanRA-01    | 47A |       |       |      | NoAmplification             |
| vanRA-02    | 47A |       |       |      | NoAmplification             |
| vanRB       | 47A | 37.94 | 76.09 | 1.77 | MultipleMeltPeaks           |
| vanRC       | 47A |       |       |      | LowEfficiency, CtIsSmall, C |
| vanRC4      | 47A |       |       |      | CurveFitFailed              |
| vanRD       | 47A |       |       |      | NoAmplification             |
| vanSA       | 47A |       |       |      | LowEfficiency, CtIsSmall, C |
| vanSB       | 47A | 29.85 | 74.76 | 2.02 |                             |
| vanSC-01    | 47A | 34.33 | 84.08 | 2    |                             |
| vanSC-02    | 47A |       |       |      | NoAmplification             |
| vanTC-01    | 47A |       |       |      | LowEfficiency, CtIsSmall, S |
| vanTC-02    | 47A | 32.73 | 86.2  | 1.81 |                             |
| vanTE       | 47A |       |       |      | BadR2, CtIsLarge, CurveFit  |
| vanTG       | 47A |       |       |      | NoAmplification             |
| vanWB       | 47A |       |       |      | NoAmplification             |
| vanWG       | 47A | 31.94 | 76.91 | 1.99 |                             |
| vanXA       | 47A |       |       |      | CurveFitFailed              |
| vanXB       | 47A |       |       |      | NoAmplification             |
| vanXD       | 47A | 30.49 | 75.64 | 2.01 |                             |

|              |     |       |       |      |                                          |
|--------------|-----|-------|-------|------|------------------------------------------|
| vanYB        | 47A |       |       |      | CurveFitFailed                           |
| vanYD-01     | 47A | 32.64 | 82.33 | 1.81 |                                          |
| vanYD-02     | 47A |       |       |      | NoAmplification                          |
| vatB-01      | 47A |       |       |      | NoAmplification                          |
| vatB-02      | 47A | 39.94 | 84.02 | 1.71 | MultipleMeltPeaks                        |
| vatC-01      | 47A |       |       |      | LowEfficiency, CtIsSmall, Ct             |
| vatC-02      | 47A | 37.66 | 83.22 | 1.79 |                                          |
| vatE-01      | 47A | 28.73 | 76.3  | 2.15 |                                          |
| vatE-02      | 47A |       |       |      | NoAmplification                          |
| vgaA-01      | 47A |       |       |      | CurveFitFailed                           |
| vgaA-02      | 47A |       |       |      | LowEfficiency, CtIsSmall, S <sub>c</sub> |
| vgb-01       | 47A | 33.59 | 87.87 | 1.9  | MultipleMeltPeaks                        |
| vgbB-01      | 47A | 38.99 | 83.31 | 1.65 | MultipleMeltPeaks                        |
| vgbB-02      | 47A |       |       |      | NoAmplification                          |
| yceE/mdtG-0  | 47A |       |       |      | CurveFitFailed                           |
| yceE/mdtG-0  | 47A |       |       |      | NoAmplification                          |
| yceL/mdtH-0  | 47A | 28.22 | 75.95 | 1.97 | MultipleMeltPeaks                        |
| yceL/mdtH-0  | 47A |       |       |      | LowEfficiency, CtIsSmall, Ct             |
| yceL/mdtH-0  | 47A | 32.98 | 87.89 | 1.9  |                                          |
| yidY/mdtL-01 | 47A | 29.89 | 82.44 | 1.97 |                                          |
| yidY/mdtL-02 | 47A | 34.58 | 86.75 | 1.89 |                                          |































| Assay          | Sample | Ct | Tm    | Efficiency | flag                         |
|----------------|--------|----|-------|------------|------------------------------|
| 16S rRNA       | 47B    |    | 12.94 | 82.26      | 2.06                         |
| aac            | 47B    |    | 29.52 | 88.25      | 2.08                         |
| aac(6')-Ib(akz | 47B    |    | 33.73 | 78.85      | 1.98 MultipleMeltPeaks       |
| aac(6')-Ib(akz | 47B    |    | 31.56 | 85.04      | 1.93 MultipleMeltPeaks       |
| aac(6')-Ib(akz | 47B    |    | 33.28 | 78.67      | 1.98                         |
| aac(6')-II     | 47B    |    | 33.17 | 80.54      | 1.81 MultipleMeltPeaks       |
| aac(6')I1      | 47B    |    | 32.5  | 90.26      | 1.98                         |
| aacA/aphD      | 47B    |    |       |            | LowEfficiency, CtIsSmall, S: |
| aacC           | 47B    |    | 26.43 | 88.94      | 1.79                         |
| aacC1          | 47B    |    |       |            | CurveFitFailed               |
| aacC2          | 47B    |    |       |            | LowEfficiency, CtIsSmall, Ci |
| aacC4          | 47B    |    | 29.02 | 90.21      | 1.99                         |
| aadA-01        | 47B    |    | 36.96 | 77.1       | 1.93 MultipleMeltPeaks       |
| aadA-02        | 47B    |    | 29.82 | 82.05      | 1.95                         |
| aadA-1-01      | 47B    |    | 25.99 | 80.51      | 1.94 MultipleMeltPeaks       |
| aadA-1-02      | 47B    |    | 25.25 | 76.45      | 2.03                         |
| aadA1          | 47B    |    | 30.11 | 78.98      | 2 MultipleMeltPeaks          |
| aadA2-01       | 47B    |    | 37.36 | 82.35      | 1.94 MultipleMeltPeaks       |
| aadA2-02       | 47B    |    | 30.68 | 75.22      | 1.92                         |
| aadA2-03       | 47B    |    | 31.65 | 85.14      | 1.97                         |
| aadA5-01       | 47B    |    | 36.62 | 79.46      | 1.88 MultipleMeltPeaks       |
| aadA5-02       | 47B    |    | 32.98 | 77.51      | 1.95 MultipleMeltPeaks       |
| aadA9-01       | 47B    |    | 31.2  | 91.48      | 1.85                         |
| aadA9-02       | 47B    |    | 32.97 | 84.24      | 1.75                         |
| aadD           | 47B    |    |       |            | CurveFitFailed               |
| aadE           | 47B    |    | 25.01 | 72.01      | 2.09                         |
| acrA-01        | 47B    |    | 22.16 | 83.23      | 1.98                         |
| acrA-02        | 47B    |    | 31.95 | 88.93      | 1.85                         |
| acrA-03        | 47B    |    | 31.02 | 89.89      | 1.86                         |
| acrA-04        | 47B    |    | 27.84 | 80.22      | 2.01 MultipleMeltPeaks       |
| acrA-05        | 47B    |    | 26.58 | 92.24      | 1.9                          |
| acrB-01        | 47B    |    | 33.84 | 79.46      | 2.06                         |
| acrF           | 47B    |    | 27.5  | 82.87      | 1.88                         |
| acrR-01        | 47B    |    | 33.37 | 86.33      | 1.88 MultipleMeltPeaks       |
| acrR-02        | 47B    |    | 36.56 | 83.16      | 1.84                         |
| Actin          | 47B    |    | 21.13 | 86.87      | 1.97 MultipleMeltPeaks       |
| adeA           | 47B    |    | 32.2  | 83.47      | 1.92                         |
| ampC-01        | 47B    |    | 29.12 | 89.74      | 2.05 MultipleMeltPeaks       |
| ampC-02        | 47B    |    | 35.2  | 88.98      | 1.87                         |
| ampC-04        | 47B    |    | 31.51 | 78.68      | 1.76 MultipleMeltPeaks       |
| ampC-05        | 47B    |    | 36.86 | 89.53      | 1.68                         |
| ampC-06        | 47B    |    | 32.89 | 83.91      | 1.95                         |
| ampC-07        | 47B    |    | 33.86 | 88.08      | 1.92                         |
| ampC-09        | 47B    |    | 35.13 | 88.85      | 1.77 MultipleMeltPeaks       |
| ampC/blaDH     | 47B    |    | 28.98 | 84.04      | 1.99 MultipleMeltPeaks       |

|                            |     |       |       |      |                                          |
|----------------------------|-----|-------|-------|------|------------------------------------------|
| aph                        | 47B |       |       |      | CurveFitFailed                           |
| aph(2')-Id-01              | 47B |       |       |      | CurveFitFailed                           |
| aph(2')-Id-02              | 47B |       |       |      | CurveFitFailed                           |
| aph6ia                     | 47B | 38.03 | 79.27 | 1.84 | MultipleMeltPeaks                        |
| aphA1(aka k <sub>z</sub> ) | 47B | 27.25 | 76.77 | 2.07 |                                          |
| bacA-01                    | 47B | 33.97 | 88.56 | 1.94 |                                          |
| bacA-02                    | 47B | 33.9  | 87.67 | 1.81 |                                          |
| BETA-globin                | 47B | 22.79 | 84.04 | 2.02 |                                          |
| bla-ACC-1                  | 47B | 32.57 | 86.12 | 1.91 |                                          |
| bla-L1                     | 47B | 30.2  | 84.01 | 1.96 | MultipleMeltPeaks                        |
| bla1                       | 47B |       |       |      | LowEfficiency, CtIsSmall, S <sub>c</sub> |
| blaCMY                     | 47B | 34.42 | 80.45 | 1.91 | MultipleMeltPeaks                        |
| blaCMY2-01                 | 47B | 36.19 | 75.58 | 1.9  | MultipleMeltPeaks                        |
| blaCMY2-02                 | 47B | 29.26 | 87.42 | 1.98 | MultipleMeltPeaks                        |
| blaCTX-M-01                | 47B | 31.37 | 90.48 | 2.03 | MultipleMeltPeaks                        |
| blaCTX-M-02                | 47B | 29.67 | 89.11 | 1.91 |                                          |
| blaCTX-M-03                | 47B |       |       |      | CurveFitFailed                           |
| blaCTX-M-04                | 47B | 27.38 | 88.24 | 2.06 |                                          |
| blaCTX-M-05                | 47B | 31.84 | 76.88 | 1.8  |                                          |
| blaCTX-M-06                | 47B | 38.15 | 82.05 | 1.77 |                                          |
| blaGES                     | 47B |       |       |      | LowEfficiency, CtIsSmall, S <sub>c</sub> |
| blaIMP-01                  | 47B |       |       |      | LowEfficiency, CtIsSmall, C <sub>i</sub> |
| blaIMP-02                  | 47B |       |       |      | LowEfficiency, CtIsSmall, S <sub>c</sub> |
| blaMOX/blaC                | 47B | 37.66 | 82.34 | 2.02 |                                          |
| blaOCH                     | 47B |       |       |      | NoAmplification                          |
| blaOKP                     | 47B |       |       |      | NoAmplification                          |
| blaOXA1/blaC               | 47B |       |       |      | CurveFitFailed                           |
| blaOXA10-01                | 47B |       |       |      | CurveFitFailed                           |
| blaOXA10-02                | 47B |       |       |      | CurveFitFailed                           |
| blaOXY                     | 47B | 30.48 | 88.73 | 1.81 | MultipleMeltPeaks                        |
| blaPAO                     | 47B | 35.83 | 88.48 | 1.8  |                                          |
| blaPER                     | 47B |       |       |      | CurveFitFailed                           |
| blaPSE                     | 47B | 37.96 | 78.37 | 1.64 |                                          |
| blaROB                     | 47B | 28.5  | 89.97 | 1.93 |                                          |
| blaSFO                     | 47B | 28.21 | 86.39 | 1.95 | MultipleMeltPeaks                        |
| blaSHV-01                  | 47B | 33.35 | 88.05 | 1.86 |                                          |
| blaSHV-02                  | 47B | 37.23 | 87.03 | 1.81 |                                          |
| blaTEM                     | 47B | 24.92 | 79.27 | 2.05 |                                          |
| blaTLA                     | 47B |       |       |      | CurveFitFailed                           |
| blaVEB                     | 47B |       |       |      | LowEfficiency, CtIsSmall, C <sub>i</sub> |
| blaVIM                     | 47B | 35.22 | 87.41 | 1.86 |                                          |
| blaZ                       | 47B | 29.35 | 73.71 | 2.04 |                                          |
| carB                       | 47B | 38.89 | 85.73 | 1.66 | MultipleMeltPeaks                        |
| catA1                      | 47B | 37.65 | 79.97 | 1.85 |                                          |
| catB3                      | 47B | 33.58 | 87.55 | 1.91 |                                          |
| catB8                      | 47B | 28.9  | 83.03 | 1.95 |                                          |

|            |     |       |       |      |                              |
|------------|-----|-------|-------|------|------------------------------|
| ceoA       | 47B | 27.15 | 91.55 | 1.96 |                              |
| cepA       | 47B |       |       |      | CurveFitFailed               |
| cfiA       | 47B | 31.54 | 86.3  | 1.86 | MultipleMeltPeaks            |
| cfr        | 47B |       |       |      | CurveFitFailed               |
| cfxA       | 47B | 19.56 | 77.62 | 2.04 |                              |
| cmeA       | 47B | 33.93 | 86.61 | 1.9  |                              |
| cmlA1-01   | 47B | 35.36 | 90.66 | 1.81 |                              |
| cmlA1-02   | 47B | 28.64 | 92.68 | 1.88 |                              |
| cmr        | 47B |       |       |      | CurveFitFailed               |
| cmx(A)     | 47B | 27.4  | 84.4  | 2.01 | MultipleMeltPeaks            |
| cphA-01    | 47B | 31.34 | 88.27 | 1.91 |                              |
| cphA-02    | 47B | 32.96 | 88.79 | 1.95 |                              |
| dfrA1      | 47B |       |       |      | CurveFitFailed               |
| dfrA12     | 47B | 35.64 | 79.88 | 1.87 |                              |
| emrD       | 47B | 28.29 | 88.82 | 1.93 |                              |
| ereA       | 47B | 39.11 | 83.12 | 1.7  |                              |
| ereB       | 47B | 31.84 | 84.95 | 1.98 |                              |
| erm(34)    | 47B | 33.54 | 90.22 | 1.88 | MultipleMeltPeaks            |
| erm(35)    | 47B |       |       |      | CurveFitFailed               |
| erm(36)    | 47B | 29.33 | 85.73 | 2.13 | MultipleMeltPeaks            |
| ermA       | 47B |       |       |      | CurveFitFailed               |
| ermA/ermTR | 47B |       |       |      | NoAmplification              |
| ermB       | 47B | 17.65 | 75.14 | 2.14 |                              |
| ermC       | 47B |       |       |      | LowEfficiency, CtIsSmall, S: |
| ermF       | 47B | 23.76 | 74.7  | 2.04 |                              |
| ermJ/ermD  | 47B |       |       |      | CurveFitFailed               |
| ermK-01    | 47B | 32.09 | 75.01 | 2.01 |                              |
| ermK-02    | 47B | 34.46 | 86.99 | 1.96 |                              |
| ermT-01    | 47B |       |       |      | CurveFitFailed               |
| ermT-02    | 47B |       |       |      | CurveFitFailed               |
| ermX       | 47B | 33.86 | 83.82 | 1.9  | MultipleMeltPeaks            |
| ermY       | 47B | 31.94 | 75.52 | 2.08 |                              |
| fabK       | 47B | 18.37 | 79.46 | 2.28 |                              |
| floR       | 47B | 33.13 | 84.94 | 1.91 |                              |
| folA       | 47B |       |       |      | NoAmplification              |
| fosB       | 47B |       |       |      | LowEfficiency, CtIsSmall, S: |
| fosX       | 47B |       |       |      | LowEfficiency, CtIsSmall, S: |
| fox5       | 47B | 24.93 | 86.16 | 1.93 |                              |
| imiR       | 47B |       |       |      | LowEfficiency, CtIsSmall, S: |
| ImrA-01    | 47B | 31.4  | 87.73 | 1.94 |                              |
| intl       | 47B | 29.39 | 84.84 | 1.94 |                              |
| intl1      | 47B | 19.4  | 87.3  | 2.06 |                              |
| IS613      | 47B | 18.49 | 79.71 | 2.08 |                              |
| lnuA-01    | 47B |       |       |      | CurveFitFailed               |
| lnuB-01    | 47B |       |       |      | LowEfficiency, CtIsSmall, S: |
| lnuB-02    | 47B |       |       |      | LowEfficiency, CtIsSmall, S: |

|                |     |       |       |      |                              |
|----------------|-----|-------|-------|------|------------------------------|
| lnuC           | 47B | 34.07 | 83.44 | 1.82 | MultipleMeltPeaks            |
| marR-01        | 47B | 32.31 | 86.88 | 1.99 |                              |
| matA/mel       | 47B | 16.39 | 77.7  | 2.11 |                              |
| mdet1          | 47B |       |       |      | CurveFitFailed               |
| mdtA           | 47B | 35.72 | 83.8  | 1.69 | MultipleMeltPeaks            |
| mdtE/yhiU      | 47B | 30.61 | 90.59 | 1.8  |                              |
| mecA           | 47B |       |       |      | LowEfficiency, CtIsSmall, S: |
| mefA           | 47B | 15.72 | 80.52 | 2.05 |                              |
| mepA           | 47B | 28.87 | 89.47 | 2.05 | MultipleMeltPeaks            |
| mexA           | 47B | 33.32 | 88.95 | 1.91 |                              |
| mexD           | 47B | 31.39 | 80.39 | 2.04 |                              |
| mexE           | 47B | 30.21 | 88.12 | 1.94 |                              |
| mexF           | 47B | 25.49 | 87.21 | 2.07 | MultipleMeltPeaks            |
| mphA-01        | 47B | 27.88 | 89.36 | 2.01 |                              |
| mphA-02        | 47B | 27    | 87.42 | 1.93 | MultipleMeltPeaks            |
| mphB           | 47B |       |       |      | CurveFitFailed               |
| mphC           | 47B | 28.13 | 75.29 | 2.02 |                              |
| msrA-01        | 47B | 29.96 | 76.44 | 2.02 |                              |
| msrC-01        | 47B |       |       |      | NoAmplification              |
| mtrC-01        | 47B | 31.54 | 83.43 | 1.92 |                              |
| mtrC-02        | 47B | 30.43 | 84.3  | 1.97 |                              |
| mtrD-02        | 47B | 26.52 | 81.25 | 1.98 | MultipleMeltPeaks            |
| mtrD-03        | 47B | 24.32 | 87.31 | 1.85 |                              |
| NDM1           | 47B |       |       |      | LowEfficiency, CtIsSmall, S: |
| nimE           | 47B | 31.67 | 84.87 | 1.93 |                              |
| nisB           | 47B | 33.2  | 81.97 | 1.97 | MultipleMeltPeaks            |
| oleC           | 47B | 32.01 | 86.84 | 1.91 | MultipleMeltPeaks            |
| oprD           | 47B | 25.22 | 87.42 | 1.97 |                              |
| oprJ           | 47B | 26.34 | 91.15 | 1.93 |                              |
| pbp            | 47B |       |       |      | CurveFitFailed               |
| pbp2x          | 47B |       |       |      | LowEfficiency, CtIsSmall, C: |
| Pbp5           | 47B |       |       |      | LowEfficiency, CtIsSmall, S: |
| penA           | 47B | 29.35 | 85.75 | 1.73 | MultipleMeltPeaks            |
| pikR1          | 47B | 36.78 | 88.79 | 1.81 |                              |
| pikR2          | 47B | 29.47 | 87.83 | 2.12 | MultipleMeltPeaks            |
| pmrA           | 47B | 16.41 | 79.85 | 2.14 |                              |
| pncA           | 47B | 22.96 | 89.52 | 1.9  |                              |
| putative multi | 47B | 33.16 | 71.37 | 2.03 | MultipleMeltPeaks            |
| qac            | 47B | 38.17 | 78.92 | 1.81 | MultipleMeltPeaks            |
| qacA           | 47B | 32.15 | 70.39 | 1.72 | MultipleMeltPeaks            |
| qacA/qacB      | 47B | 36.72 | 87.06 | 1.77 |                              |
| qacEdelta1-0   | 47B |       |       |      | CurveFitFailed               |
| qacEdelta1-0   | 47B | 28.33 | 85.91 | 2.02 | MultipleMeltPeaks            |
| qacH-01        | 47B | 27.96 | 89.79 | 2.01 | MultipleMeltPeaks            |
| qacH-02        | 47B | 36.45 | 83.65 | 1.64 |                              |
| qnrA           | 47B | 31.12 | 79.63 | 2.02 |                              |



|              |     |       |       |      |                              |
|--------------|-----|-------|-------|------|------------------------------|
| rarD-02      | 47B | 34.1  | 84.42 | 2.07 | MultipleMeltPeaks            |
| sat4         | 47B | 24.69 | 74.79 | 1.97 | MultipleMeltPeaks            |
| sdeB         | 47B |       |       |      | LowEfficiency, CtIsSmall, S: |
| spcN-01      | 47B |       |       |      | CurveFitFailed               |
| speA         | 47B |       |       |      | LowEfficiency, CtIsSmall, Ci |
| str          | 47B | 25.75 | 72.6  | 2.04 |                              |
| strA         | 47B |       |       |      | CurveFitFailed               |
| strB         | 47B | 27.13 | 83.43 | 1.95 |                              |
| sul1         | 47B | 34    | 89.53 | 1.82 |                              |
| sul2         | 47B | 26.34 | 85.86 | 2.01 |                              |
| sulA/foIP-01 | 47B | 15.23 | 81.57 | 2.09 |                              |
| sulA/foIP-03 | 47B | 15.87 | 83.83 | 2.06 |                              |
| tet(32)      | 47B | 19.69 | 81.45 | 2    |                              |
| tet(34)      | 47B | 31.87 | 75.52 | 1.96 |                              |
| tet(35)      | 47B | 37.2  | 75.53 | 1.93 |                              |
| tet(36)-A    | 47B |       |       |      | CurveFitFailed               |
| tet(36)-B    | 47B |       |       |      | LowEfficiency, CtIsSmall, S: |
| tet(37)      | 47B | 33.32 | 84.66 | 1.94 | MultipleMeltPeaks            |
| tetA-01      | 47B | 29.86 | 85.11 | 1.87 |                              |
| tetA-02      | 47B | 35.02 | 89.18 | 1.81 |                              |
| tetB-01      | 47B | 33.8  | 86.09 | 2.03 |                              |
| tetB-02      | 47B | 29.17 | 79.54 | 1.99 |                              |
| tetC-01      | 47B | 28.84 | 75.25 | 2.01 |                              |
| tetC-02      | 47B |       |       |      | CurveFitFailed               |
| tetD-01      | 47B |       |       |      | LowEfficiency, CtIsSmall, S: |
| tetD-02      | 47B | 34.59 | 75.83 | 1.89 | MultipleMeltPeaks            |
| tetE         | 47B |       |       |      | CurveFitFailed               |
| tetG-01      | 47B | 29.52 | 90.25 | 1.94 |                              |
| tetG-02      | 47B | 29.7  | 87.73 | 1.94 |                              |
| tetH         | 47B |       |       |      | LowEfficiency, CtIsSmall, Ci |
| tetJ         | 47B |       |       |      | CurveFitFailed               |
| tetK         | 47B | 26.6  | 72.49 | 2.03 |                              |
| tetL-01      | 47B |       |       |      | CurveFitFailed               |
| tetL-02      | 47B | 31.52 | 85.08 | 1.85 | MultipleMeltPeaks            |
| tetM-01      | 47B | 17.02 | 76.22 | 2.06 |                              |
| tetM-02      | 47B | 16.96 | 77.73 | 2.08 |                              |
| tetO-01      | 47B |       |       |      | CurveFitFailed               |
| tetPA        | 47B |       |       |      | LowEfficiency, CtIsSmall, Ci |
| tetPB-01     | 47B | 35.74 | 90.34 | 1.87 | MultipleMeltPeaks            |
| tetPB-02     | 47B | 24.97 | 84.47 | 2.06 |                              |
| tetPB-03     | 47B | 34.17 | 72.37 | 2.11 |                              |
| tetPB-05     | 47B |       |       |      | LowEfficiency, CtIsSmall, S: |
| tetQ         | 47B | 24.47 | 76.11 | 2.07 |                              |
| tetR-02      | 47B | 27.83 | 90.42 | 1.98 |                              |
| tetR-03      | 47B | 27.57 | 76.08 | 2.01 |                              |
| tetS         | 47B | 36.12 | 86.84 | 1.86 |                              |

|             |     |       |       |      |                              |
|-------------|-----|-------|-------|------|------------------------------|
| tetT        | 47B |       |       |      | LowEfficiency, CtIsSmall, Ci |
| tetU-01     | 47B |       |       |      | LowEfficiency, CtIsSmall, S: |
| tetV        | 47B |       |       |      | CurveFitFailed               |
| tetW-01     | 47B | 23.79 | 82.04 | 2.02 |                              |
| tetX        | 47B |       |       |      | CurveFitFailed               |
| tnpA-01     | 47B | 37.25 | 79.52 | 1.92 |                              |
| tnpA-02     | 47B | 29.31 | 84.79 | 1.78 |                              |
| tnpA-03     | 47B | 35.04 | 79.88 | 2.08 | MultipleMeltPeaks            |
| tnpA-04     | 47B | 29.57 | 82.25 | 1.9  |                              |
| tnpA-05     | 47B | 27.24 | 80.82 | 1.93 |                              |
| tnpA-07     | 47B |       |       |      | LowEfficiency, CtIsSmall, S: |
| tolC-01     | 47B | 28.71 | 81.48 | 1.95 |                              |
| tolC-02     | 47B | 30.28 | 85.22 | 1.94 | MultipleMeltPeaks            |
| tolC-03     | 47B | 31.38 | 87.75 | 1.96 | MultipleMeltPeaks            |
| Tp614       | 47B | 36.67 | 74.14 | 1.86 | MultipleMeltPeaks            |
| ttgA        | 47B | 30.76 | 88.1  | 1.87 |                              |
| ttgB        | 47B | 34.01 | 84.23 | 1.92 |                              |
| vanA        | 47B |       |       |      | LowEfficiency, CtIsSmall, Ci |
| vanB-01     | 47B | 30.63 | 83.72 | 2.06 |                              |
| vanC-01     | 47B | 36.82 | 75.89 | 1.89 |                              |
| vanC-02     | 47B | 35.37 | 87.87 | 1.81 |                              |
| vanC-03     | 47B | 24.53 | 86.78 | 1.99 |                              |
| vanC1       | 47B |       |       |      | LowEfficiency, CtIsSmall, S: |
| vanC2/vanC3 | 47B | 34.17 | 84.5  | 2.14 | MultipleMeltPeaks            |
| vanG        | 47B |       |       |      | BadR2, LowEfficiency, CtIsS  |
| vanHB       | 47B | 31.71 | 89.43 | 1.96 | MultipleMeltPeaks            |
| vanHD       | 47B | 35.58 | 86.07 | 1.84 |                              |
| vanRA-01    | 47B |       |       |      | LowEfficiency, CtIsSmall, Ci |
| vanRA-02    | 47B |       |       |      | LowEfficiency, CtIsSmall, Ci |
| vanRB       | 47B | 30.08 | 81.04 | 2.07 |                              |
| vanRC       | 47B |       |       |      | CurveFitFailed               |
| vanRC4      | 47B |       |       |      | LowEfficiency, CtIsSmall, S: |
| vanRD       | 47B |       |       |      | CurveFitFailed               |
| vanSA       | 47B |       |       |      | LowEfficiency, CtIsSmall, S: |
| vanSB       | 47B | 29.65 | 74.69 | 2    |                              |
| vanSC-01    | 47B | 34.25 | 84.01 | 2.02 |                              |
| vanSC-02    | 47B |       |       |      | NoAmplification              |
| vanTC-01    | 47B |       |       |      | LowEfficiency, CtIsSmall, S: |
| vanTC-02    | 47B | 27.75 | 86.02 | 1.88 |                              |
| vanTE       | 47B | 37.65 | 89.58 | 1.8  | MultipleMeltPeaks            |
| vanTG       | 47B |       |       |      | LowEfficiency, CtIsSmall, Ci |
| vanWB       | 47B |       |       |      | LowEfficiency, CtIsSmall, S: |
| vanWG       | 47B |       |       |      | LowEfficiency, CtIsSmall, S: |
| vanXA       | 47B |       |       |      | CurveFitFailed               |
| vanXB       | 47B |       |       |      | LowEfficiency, CtIsSmall, Ci |
| vanXD       | 47B | 32.41 | 75.15 | 2.02 |                              |

|              |     |       |       |      |                              |
|--------------|-----|-------|-------|------|------------------------------|
| vanYB        | 47B | 31.66 | 79.4  | 1.94 |                              |
| vanYD-01     | 47B | 32.23 | 81.88 | 1.87 |                              |
| vanYD-02     | 47B |       |       |      | LowEfficiency, CtIsSmall, S: |
| vatB-01      | 47B |       |       |      | CurveFitFailed               |
| vatB-02      | 47B | 35.72 | 81.93 | 1.91 |                              |
| vatC-01      | 47B | 35.39 | 81.64 | 1.87 |                              |
| vatC-02      | 47B | 36.35 | 87.5  | 1.85 | MultipleMeltPeaks            |
| vatE-01      | 47B | 29.02 | 76.23 | 2.17 | MultipleMeltPeaks            |
| vatE-02      | 47B | 37.71 | 75.23 | 2.02 |                              |
| vgaA-01      | 47B | 36.99 | 76.63 | 1.92 |                              |
| vgaA-02      | 47B |       |       |      | LowEfficiency, CtIsSmall, S: |
| vgb-01       | 47B | 31.27 | 86.94 | 1.95 | MultipleMeltPeaks            |
| vgbB-01      | 47B |       |       |      | CurveFitFailed               |
| vgbB-02      | 47B |       |       |      | LowEfficiency, CtIsSmall, S: |
| yceE/mdtG-0  | 47B |       |       |      | LowEfficiency, CtIsSmall, S: |
| yceE/mdtG-0  | 47B |       |       |      | LowEfficiency, CtIsSmall, Ci |
| yceL/mdtH-0  | 47B | 25.49 | 84.72 | 1.97 |                              |
| yceL/mdtH-0  | 47B |       |       |      | CurveFitFailed               |
| yceL/mdtH-0  | 47B | 33.99 | 76.88 | 1.77 | MultipleMeltPeaks            |
| yidY/mdtL-01 | 47B | 29.83 | 84.06 | 1.93 |                              |
| yidY/mdtL-02 | 47B |       |       |      | CurveFitFailed               |































| Assay          | Sample | Ct | Tm    | Efficiency | flag                         |
|----------------|--------|----|-------|------------|------------------------------|
| 16S rRNA       | 47C    |    | 11.15 | 82.48      | 1.91                         |
| aac            | 47C    |    | 32.17 | 82.08      | 2 MultipleMeltPeaks          |
| aac(6')-Ib(akz | 47C    |    | 35.42 | 83.18      | 1.89                         |
| aac(6')-Ib(akz | 47C    |    | 36.31 | 84.79      | 1.79 MultipleMeltPeaks       |
| aac(6')-Ib(akz | 47C    |    | 36.08 | 84.2       | 1.88                         |
| aac(6')-II     | 47C    |    |       |            | CurveFitFailed               |
| aac(6')I1      | 47C    |    | 37.98 | 86.68      | 1.65 MultipleMeltPeaks       |
| aacA/aphD      | 47C    |    |       |            | CurveFitFailed               |
| aacC           | 47C    |    | 29.58 | 89.65      | 1.82                         |
| aacC1          | 47C    |    |       |            | NoAmplification              |
| aacC2          | 47C    |    | 36.5  | 84.67      | 1.89 MultipleMeltPeaks       |
| aacC4          | 47C    |    | 34.84 | 89.92      | 1.84                         |
| aadA-01        | 47C    |    |       |            | LowEfficiency, CtIsSmall, S: |
| aadA-02        | 47C    |    |       |            | CurveFitFailed               |
| aadA-1-01      | 47C    |    | 26.6  | 80.02      | 1.92                         |
| aadA-1-02      | 47C    |    | 24.42 | 76.66      | 2.01                         |
| aadA1          | 47C    |    | 36.96 | 83.81      | 1.87                         |
| aadA2-01       | 47C    |    |       |            | CurveFitFailed               |
| aadA2-02       | 47C    |    | 32.81 | 75.45      | 2.02                         |
| aadA2-03       | 47C    |    |       |            | BadR2, LowEfficiency, CtIsS  |
| aadA5-01       | 47C    |    |       |            | CurveFitFailed               |
| aadA5-02       | 47C    |    | 38.23 | 80.72      | 1.81 MultipleMeltPeaks       |
| aadA9-01       | 47C    |    | 37.34 | 88.27      | 1.72 MultipleMeltPeaks       |
| aadA9-02       | 47C    |    |       |            | LowEfficiency, CtIsSmall, S: |
| aadD           | 47C    |    |       |            | CurveFitFailed               |
| aadE           | 47C    |    | 24.91 | 72.09      | 2.06                         |
| acrA-01        | 47C    |    | 23.7  | 83.26      | 1.94                         |
| acrA-02        | 47C    |    | 33.97 | 87.72      | 1.91 MultipleMeltPeaks       |
| acrA-03        | 47C    |    |       |            | CurveFitFailed               |
| acrA-04        | 47C    |    | 29.33 | 83.53      | 1.94 MultipleMeltPeaks       |
| acrA-05        | 47C    |    | 30.16 | 92.35      | 1.93 MultipleMeltPeaks       |
| acrB-01        | 47C    |    |       |            | NoAmplification              |
| acrF           | 47C    |    | 34.28 | 82.28      | 2                            |
| acrR-01        | 47C    |    | 32.9  | 80.61      | 1.91                         |
| acrR-02        | 47C    |    |       |            | LowEfficiency, CtIsSmall, S: |
| Actin          | 47C    |    | 23.36 | 83.89      | 1.95 MultipleMeltPeaks       |
| adeA           | 47C    |    |       |            | LowEfficiency, CtIsSmall, S: |
| ampC-01        | 47C    |    | 26.71 | 80.85      | 1.97                         |
| ampC-02        | 47C    |    |       |            | CurveFitFailed               |
| ampC-04        | 47C    |    | 33.64 | 78.37      | 1.93 MultipleMeltPeaks       |
| ampC-05        | 47C    |    | 41.18 | 89.82      | 1.53 MultipleMeltPeaks       |
| ampC-06        | 47C    |    |       |            | CurveFitFailed               |
| ampC-07        | 47C    |    |       |            | CurveFitFailed               |
| ampC-09        | 47C    |    |       |            | CurveFitFailed               |
| ampC/blaDH     | 47C    |    | 33.05 | 77.04      | 1.98 MultipleMeltPeaks       |

|                          |     |       |       |      |                                          |
|--------------------------|-----|-------|-------|------|------------------------------------------|
| aph                      | 47C |       |       |      | LowEfficiency, CtIsSmall, S <sub>e</sub> |
| aph(2')-Id-01            | 47C |       |       |      | LowEfficiency, CtIsSmall, S <sub>e</sub> |
| aph(2')-Id-02            | 47C |       |       |      | LowEfficiency, CtIsSmall, S <sub>e</sub> |
| aph6ia                   | 47C |       |       |      | LowEfficiency, CtIsSmall, S <sub>e</sub> |
| aphA1(aka k <sub>z</sub> | 47C |       |       |      | LowEfficiency, CtIsSmall, S <sub>e</sub> |
| bacA-01                  | 47C | 37.17 | 75.26 | 1.89 | MultipleMeltPeaks                        |
| bacA-02                  | 47C | 35.23 | 83.61 | 1.7  |                                          |
| BETA-globin              | 47C | 23.95 | 84.29 | 1.99 |                                          |
| bla-ACC-1                | 47C | 39.87 | 83.49 | 1.71 | MultipleMeltPeaks                        |
| bla-L1                   | 47C | 34.01 | 82.07 | 1.92 |                                          |
| bla1                     | 47C |       |       |      | LowEfficiency, CtIsSmall, S <sub>e</sub> |
| blaCMY                   | 47C | 32.09 | 77.93 | 1.89 |                                          |
| blaCMY2-01               | 47C | 28.78 | 82.9  | 2.1  |                                          |
| blaCMY2-02               | 47C | 30.57 | 83.78 | 1.92 |                                          |
| blaCTX-M-01              | 47C | 35.09 | 80.92 | 1.98 | MultipleMeltPeaks                        |
| blaCTX-M-02              | 47C | 34.83 | 89.1  | 1.8  |                                          |
| blaCTX-M-03              | 47C |       |       |      | LowEfficiency, CtIsSmall, S <sub>e</sub> |
| blaCTX-M-04              | 47C | 29.75 | 87.9  | 1.97 |                                          |
| blaCTX-M-05              | 47C | 34.67 | 76    | 1.87 | MultipleMeltPeaks                        |
| blaCTX-M-06              | 47C |       |       |      | NoAmplification                          |
| blaGES                   | 47C |       |       |      | LowEfficiency, CtIsSmall, C <sub>i</sub> |
| blaIMP-01                | 47C |       |       |      | NoAmplification                          |
| blaIMP-02                | 47C | 41.22 | 74.82 | 1.72 |                                          |
| blaMOX/blaC              | 47C | 37.97 | 83.41 | 1.89 |                                          |
| blaOCH                   | 47C | 28.66 | 86.59 | 2.08 | MultipleMeltPeaks                        |
| blaOKP                   | 47C |       |       |      | NoAmplification                          |
| blaOXA1/blaC             | 47C |       |       |      | LowEfficiency, CtIsSmall, S <sub>e</sub> |
| blaOXA10-01              | 47C | 36.07 | 80.48 | 1.96 |                                          |
| blaOXA10-02              | 47C |       |       |      | CurveFitFailed                           |
| blaOXY                   | 47C |       |       |      | CurveFitFailed                           |
| blaPAO                   | 47C |       |       |      | NoAmplification                          |
| blaPER                   | 47C |       |       |      | LowEfficiency, CtIsSmall, S <sub>e</sub> |
| blaPSE                   | 47C |       |       |      | NoAmplification                          |
| blaROB                   | 47C | 31.77 | 90.22 | 1.75 |                                          |
| blaSFO                   | 47C | 31.44 | 84.62 | 1.8  |                                          |
| blaSHV-01                | 47C | 33    | 89.29 | 1.65 |                                          |
| blaSHV-02                | 47C | 36.82 | 79.65 | 1.91 |                                          |
| blaTEM                   | 47C | 25.7  | 79.45 | 1.92 |                                          |
| blaTLA                   | 47C |       |       |      | LowEfficiency, CtIsSmall, S <sub>e</sub> |
| blaVEB                   | 47C |       |       |      | CurveFitFailed                           |
| blaVIM                   | 47C | 38.24 | 89.4  | 1.83 | MultipleMeltPeaks                        |
| blaZ                     | 47C | 28.36 | 75.04 | 2.03 |                                          |
| carB                     | 47C | 32.11 | 90.08 | 1.83 |                                          |
| catA1                    | 47C |       |       |      | NoAmplification                          |
| catB3                    | 47C | 37.81 | 80.11 | 1.83 |                                          |
| catB8                    | 47C | 33.92 | 81.09 | 1.92 |                                          |

|            |     |       |       |      |                              |
|------------|-----|-------|-------|------|------------------------------|
| ceoA       | 47C | 29.47 | 92.27 | 1.88 |                              |
| cepA       | 47C |       |       |      | LowEfficiency, CtIsSmall, S: |
| cfiA       | 47C | 36.72 | 79.91 | 1.88 | MultipleMeltPeaks            |
| cfr        | 47C |       |       |      | LowEfficiency, CtIsSmall, S: |
| cfxA       | 47C | 22.2  | 77.72 | 2.03 |                              |
| cmeA       | 47C |       |       |      | LowEfficiency, CtIsSmall, S: |
| cmlA1-01   | 47C | 37.45 | 88.37 | 1.87 | MultipleMeltPeaks            |
| cmlA1-02   | 47C | 36.44 | 92.68 | 1.76 | MultipleMeltPeaks            |
| cmr        | 47C |       |       |      | CurveFitFailed               |
| cmx(A)     | 47C | 29.6  | 84.25 | 1.98 |                              |
| cphA-01    | 47C | 35.5  | 79.45 | 1.88 | MultipleMeltPeaks            |
| cphA-02    | 47C | 36.68 | 82.52 | 1.86 |                              |
| dfrA1      | 47C |       |       |      | NoAmplification              |
| dfrA12     | 47C | 40.13 | 81.97 | 1.71 | MultipleMeltPeaks            |
| emrD       | 47C | 35.4  | 88.64 | 1.83 |                              |
| ereA       | 47C |       |       |      | CurveFitFailed               |
| ereB       | 47C |       |       |      | CurveFitFailed               |
| erm(34)    | 47C | 36.72 | 91.08 | 1.77 |                              |
| erm(35)    | 47C |       |       |      | LowEfficiency, CtIsSmall, S: |
| erm(36)    | 47C | 27.58 | 81.53 | 2.1  | MultipleMeltPeaks            |
| ermA       | 47C |       |       |      | CurveFitFailed               |
| ermA/ermTR | 47C |       |       |      | NoAmplification              |
| ermB       | 47C | 22.77 | 75.11 | 2.14 |                              |
| ermC       | 47C |       |       |      | CurveFitFailed               |
| ermF       | 47C | 26.19 | 74.82 | 2    |                              |
| ermJ/ermD  | 47C |       |       |      | LowEfficiency, CtIsSmall, S: |
| ermK-01    | 47C | 35.94 | 73.95 | 1.95 |                              |
| ermK-02    | 47C |       |       |      | CurveFitFailed               |
| ermT-01    | 47C |       |       |      | LowEfficiency, CtIsSmall, S: |
| ermT-02    | 47C |       |       |      | LowEfficiency, CtIsSmall, S: |
| ermX       | 47C |       |       |      | LowEfficiency, CtIsSmall, S: |
| ermY       | 47C |       |       |      | LowEfficiency, CtIsSmall, S: |
| fabK       | 47C | 20.96 | 79.11 | 2.17 |                              |
| floR       | 47C | 37.14 | 90.66 | 1.86 |                              |
| folA       | 47C |       |       |      | NoAmplification              |
| fosB       | 47C |       |       |      | LowEfficiency, CtIsSmall, S: |
| fosX       | 47C |       |       |      | CurveFitFailed               |
| fox5       | 47C | 25.77 | 84.67 | 1.87 | MultipleMeltPeaks            |
| imiR       | 47C |       |       |      | CurveFitFailed               |
| ImrA-01    | 47C | 35.99 | 84.39 | 1.87 | MultipleMeltPeaks            |
| intl       | 47C | 32.56 | 84.78 | 1.9  | MultipleMeltPeaks            |
| intl1      | 47C | 19.76 | 86.9  | 1.99 | MultipleMeltPeaks            |
| IS613      | 47C | 21.8  | 79.84 | 2.06 |                              |
| lnuA-01    | 47C |       |       |      | LowEfficiency, CtIsSmall, S: |
| lnuB-01    | 47C |       |       |      | LowEfficiency, CtIsSmall, S: |
| lnuB-02    | 47C |       |       |      | LowEfficiency, CtIsSmall, S: |

|                |     |       |       |      |                                          |
|----------------|-----|-------|-------|------|------------------------------------------|
| lnuC           | 47C | 38.18 | 89.17 | 1.69 | MultipleMeltPeaks                        |
| marR-01        | 47C | 32.54 | 86.99 | 1.93 |                                          |
| matA/mel       | 47C | 16.67 | 77.86 | 2.07 |                                          |
| mdet1          | 47C |       |       |      | LowEfficiency, CtIsSmall, S <sub>e</sub> |
| mdtA           | 47C |       |       |      | CurveFitFailed                           |
| mdtE/yhiU      | 47C | 38.09 | 80.38 | 1.71 | MultipleMeltPeaks                        |
| mecA           | 47C |       |       |      | LowEfficiency, CtIsSmall, S <sub>e</sub> |
| mefA           | 47C | 16.23 | 80.65 | 2.01 | MultipleMeltPeaks                        |
| mepA           | 47C | 30.96 | 86.86 | 2.01 | MultipleMeltPeaks                        |
| mexA           | 47C | 34.01 | 74.72 | 1.96 |                                          |
| mexD           | 47C | 37.64 | 79.74 | 1.84 |                                          |
| mexE           | 47C | 30.34 | 88.39 | 1.92 |                                          |
| mexF           | 47C | 28.08 | 87.53 | 1.95 |                                          |
| mphA-01        | 47C | 29.53 | 89.57 | 1.87 |                                          |
| mphA-02        | 47C | 30.08 | 87.93 | 1.38 | MultipleMeltPeaks                        |
| mphB           | 47C |       |       |      | CurveFitFailed                           |
| mphC           | 47C |       |       |      | LowEfficiency, CtIsSmall, C <sub>i</sub> |
| msrA-01        | 47C |       |       |      | CurveFitFailed                           |
| msrC-01        | 47C |       |       |      | NoAmplification                          |
| mtrC-01        | 47C |       |       |      | LowEfficiency, CtIsSmall, S <sub>e</sub> |
| mtrC-02        | 47C |       |       |      | LowEfficiency, CtIsSmall, S <sub>e</sub> |
| mtrD-02        | 47C | 27.6  | 81.84 | 2.01 |                                          |
| mtrD-03        | 47C | 27.84 | 80.64 | 1.81 |                                          |
| NDM1           | 47C | 36.19 | 76.27 | 1.88 |                                          |
| nimE           | 47C |       |       |      | LowEfficiency, CtIsSmall, S <sub>e</sub> |
| nisB           | 47C | 35.26 | 82.21 | 1.91 |                                          |
| oleC           | 47C | 34.66 | 87.52 | 1.91 |                                          |
| oprD           | 47C | 25.71 | 87.37 | 1.91 | MultipleMeltPeaks                        |
| oprJ           | 47C | 26.38 | 88.79 | 1.98 | MultipleMeltPeaks                        |
| pbp            | 47C |       |       |      | LowEfficiency, CtIsSmall, S <sub>e</sub> |
| pbp2x          | 47C |       |       |      | LowEfficiency, CtIsSmall, C <sub>i</sub> |
| Pbp5           | 47C |       |       |      | LowEfficiency, CtIsSmall, S <sub>e</sub> |
| penA           | 47C | 34.31 | 85.32 | 1.61 |                                          |
| pikR1          | 47C | 31.71 | 86.07 | 1.97 |                                          |
| pikR2          | 47C | 31.1  | 90.64 | 2.09 |                                          |
| pmrA           | 47C | 15.96 | 79.09 | 2.15 |                                          |
| pncA           | 47C | 26.32 | 89.7  | 1.61 |                                          |
| putative multi | 47C |       |       |      | LowEfficiency, CtIsSmall, S <sub>e</sub> |
| qac            | 47C | 34.39 | 80.14 | 1.98 |                                          |
| qacA           | 47C | 32.7  | 79.35 | 1.99 |                                          |
| qacA/qacB      | 47C |       |       |      | LowEfficiency, CtIsSmall, S <sub>e</sub> |
| qacEdelta1-0   | 47C | 28.16 | 79.35 | 2.01 |                                          |
| qacEdelta1-0   | 47C | 34.84 | 75.68 | 1.96 |                                          |
| qacH-01        | 47C | 33.81 | 86.68 | 1.94 |                                          |
| qacH-02        | 47C |       |       |      | CurveFitFailed                           |
| qnrA           | 47C | 32.9  | 79.97 | 2.03 |                                          |

|              |     |       |       |      |                                          |
|--------------|-----|-------|-------|------|------------------------------------------|
| rarD-02      | 47C | 31.55 | 83.06 | 2.03 |                                          |
| sat4         | 47C | 24.22 | 74.9  | 1.86 | MultipleMeltPeaks                        |
| sdeB         | 47C |       |       |      | LowEfficiency, CtIsSmall, S <sub>c</sub> |
| spcN-01      | 47C |       |       |      | CurveFitFailed                           |
| speA         | 47C |       |       |      | NoAmplification                          |
| str          | 47C |       |       |      | LowEfficiency, CtIsSmall, C <sub>i</sub> |
| strA         | 47C |       |       |      | LowEfficiency, CtIsSmall, S <sub>c</sub> |
| strB         | 47C | 29.65 | 83.92 | 1.9  |                                          |
| sul1         | 47C | 37.48 | 83.4  | 1.61 |                                          |
| sul2         | 47C | 36.33 | 89.51 | 1.87 |                                          |
| sulA/foIP-01 | 47C | 15.9  | 80.78 | 2.04 |                                          |
| sulA/foIP-03 | 47C | 15.61 | 83.05 | 2.01 |                                          |
| tet(32)      | 47C | 18.28 | 81.58 | 1.97 |                                          |
| tet(34)      | 47C |       |       |      | LowEfficiency, CtIsSmall, S <sub>c</sub> |
| tet(35)      | 47C |       |       |      | NoAmplification                          |
| tet(36)-A    | 47C |       |       |      | LowEfficiency, CtIsSmall, S <sub>c</sub> |
| tet(36)-B    | 47C |       |       |      | LowEfficiency, CtIsSmall, S <sub>c</sub> |
| tet(37)      | 47C | 32.49 | 82.12 | 1.92 |                                          |
| tetA-01      | 47C | 34.47 | 85.17 | 1.89 |                                          |
| tetA-02      | 47C | 33.72 | 85.47 | 1.95 |                                          |
| tetB-01      | 47C | 29.99 | 79.79 | 1.93 |                                          |
| tetB-02      | 47C |       |       |      | BadR2, LowEfficiency, CtIsS              |
| tetC-01      | 47C | 30.29 | 75.3  | 1.91 |                                          |
| tetC-02      | 47C |       |       |      | CurveFitFailed                           |
| tetD-01      | 47C |       |       |      | LowEfficiency, CtIsSmall, S <sub>c</sub> |
| tetD-02      | 47C | 37.18 | 75.71 | 1.86 | MultipleMeltPeaks                        |
| tetE         | 47C |       |       |      | LowEfficiency, CtIsSmall, S <sub>c</sub> |
| tetG-01      | 47C | 33.18 | 90.73 | 2    |                                          |
| tetG-02      | 47C | 32.12 | 87.27 | 1.96 |                                          |
| tetH         | 47C |       |       |      | LowEfficiency, CtIsSmall, C <sub>i</sub> |
| tetJ         | 47C |       |       |      | LowEfficiency, CtIsSmall, S <sub>c</sub> |
| tetK         | 47C | 31.46 | 72.45 | 2.02 |                                          |
| tetL-01      | 47C |       |       |      | LowEfficiency, CtIsSmall, S <sub>c</sub> |
| tetL-02      | 47C | 34.74 | 86.1  | 1.88 |                                          |
| tetM-01      | 47C | 17.13 | 76.38 | 2    |                                          |
| tetM-02      | 47C | 17.32 | 77.85 | 2.05 |                                          |
| tetO-01      | 47C |       |       |      | LowEfficiency, CtIsSmall, S <sub>c</sub> |
| tetPA        | 47C |       |       |      | LowEfficiency, CtIsSmall, S <sub>c</sub> |
| tetPB-01     | 47C | 38.15 | 86.28 | 1.82 | MultipleMeltPeaks                        |
| tetPB-02     | 47C | 28.87 | 83.75 | 2.04 |                                          |
| tetPB-03     | 47C |       |       |      | LowEfficiency, CtIsSmall, S <sub>c</sub> |
| tetPB-05     | 47C | 37.15 | 73.71 | 1.77 |                                          |
| tetQ         | 47C | 25.29 | 76.74 | 2.06 |                                          |
| tetR-02      | 47C | 28.97 | 90.57 | 2.03 | MultipleMeltPeaks                        |
| tetR-03      | 47C | 28.39 | 76.2  | 1.98 |                                          |
| tetS         | 47C |       |       |      | LowEfficiency, CtIsSmall, S <sub>c</sub> |

|             |     |       |       |      |                                          |
|-------------|-----|-------|-------|------|------------------------------------------|
| tetT        | 47C |       |       |      | NoAmplification                          |
| tetU-01     | 47C |       |       |      | LowEfficiency, CtIsSmall, S <sub>e</sub> |
| tetV        | 47C |       |       |      | LowEfficiency, CtIsSmall, C <sub>i</sub> |
| tetW-01     | 47C | 25.09 | 82.06 | 1.98 |                                          |
| tetX        | 47C |       |       |      | CurveFitFailed                           |
| tnpA-01     | 47C |       |       |      | LowEfficiency, CtIsSmall, S <sub>e</sub> |
| tnpA-02     | 47C | 28.43 | 85.06 | 1.78 |                                          |
| tnpA-03     | 47C | 24.26 | 78.24 | 2.09 |                                          |
| tnpA-04     | 47C |       |       |      | CurveFitFailed                           |
| tnpA-05     | 47C | 27.83 | 81    | 1.91 |                                          |
| tnpA-07     | 47C |       |       |      | LowEfficiency, CtIsSmall, S <sub>e</sub> |
| tolC-01     | 47C | 33.82 | 81.55 | 1.9  |                                          |
| tolC-02     | 47C | 30.67 | 85.55 | 1.95 |                                          |
| tolC-03     | 47C | 32.8  | 81.46 | 1.96 | MultipleMeltPeaks                        |
| Tp614       | 47C |       |       |      | LowEfficiency, CtIsSmall, S <sub>e</sub> |
| ttgA        | 47C | 36.21 | 81.16 | 1.79 |                                          |
| ttgB        | 47C | 34.28 | 89.66 | 1.86 |                                          |
| vanA        | 47C |       |       |      | NoAmplification                          |
| vanB-01     | 47C | 33.24 | 83.58 | 2.06 |                                          |
| vanC-01     | 47C |       |       |      | LowEfficiency, CtIsSmall, C <sub>i</sub> |
| vanC-02     | 47C |       |       |      | LowEfficiency, CtIsSmall, S <sub>e</sub> |
| vanC-03     | 47C | 27.64 | 86.26 | 1.93 |                                          |
| vanC1       | 47C |       |       |      | CurveFitFailed                           |
| vanC2/vanC3 | 47C | 36.63 | 77.51 | 1.95 |                                          |
| vanG        | 47C | 38.03 | 70.85 | 1.87 |                                          |
| vanHB       | 47C | 38.37 | 90.57 | 1.69 | MultipleMeltPeaks                        |
| vanHD       | 47C | 36.42 | 86.23 | 1.85 |                                          |
| vanRA-01    | 47C |       |       |      | LowEfficiency, CtIsSmall, S <sub>e</sub> |
| vanRA-02    | 47C |       |       |      | LowEfficiency, CtIsSmall, C <sub>i</sub> |
| vanRB       | 47C | 35.42 | 82.06 | 1.84 |                                          |
| vanRC       | 47C |       |       |      | LowEfficiency, CtIsSmall, S <sub>e</sub> |
| vanRC4      | 47C |       |       |      | LowEfficiency, CtIsSmall, S <sub>e</sub> |
| vanRD       | 47C |       |       |      | CurveFitFailed                           |
| vanSA       | 47C |       |       |      | LowEfficiency, CtIsSmall, C <sub>i</sub> |
| vanSB       | 47C | 30.5  | 74.42 | 1.95 | MultipleMeltPeaks                        |
| vanSC-01    | 47C | 31.59 | 84.26 | 1.96 |                                          |
| vanSC-02    | 47C |       |       |      | NoAmplification                          |
| vanTC-01    | 47C |       |       |      | LowEfficiency, CtIsSmall, S <sub>e</sub> |
| vanTC-02    | 47C | 32.85 | 86.35 | 1.84 |                                          |
| vanTE       | 47C |       |       |      | NoAmplification                          |
| vanTG       | 47C |       |       |      | CurveFitFailed                           |
| vanWB       | 47C |       |       |      | LowEfficiency, CtIsSmall, C <sub>i</sub> |
| vanWG       | 47C |       |       |      | CurveFitFailed                           |
| vanXA       | 47C |       |       |      | LowEfficiency, CtIsSmall, C <sub>i</sub> |
| vanXB       | 47C |       |       |      | NoAmplification                          |
| vanXD       | 47C | 32.52 | 75.81 | 1.99 |                                          |

|              |     |       |       |      |                              |
|--------------|-----|-------|-------|------|------------------------------|
| vanYB        | 47C |       |       |      | LowEfficiency, CtIsSmall, Ci |
| vanYD-01     | 47C | 34.82 | 81.37 | 1.88 |                              |
| vanYD-02     | 47C | 37.71 | 75    | 2.01 |                              |
| vatB-01      | 47C | 36.63 | 74.91 | 1.89 |                              |
| vatB-02      | 47C |       |       |      | LowEfficiency, CtIsSmall, S: |
| vatC-01      | 47C |       |       |      | CurveFitFailed               |
| vatC-02      | 47C |       |       |      | LowEfficiency, CtIsSmall, S: |
| vatE-01      | 47C | 30.26 | 76.9  | 2.02 |                              |
| vatE-02      | 47C |       |       |      | NoAmplification              |
| vgaA-01      | 47C |       |       |      | CurveFitFailed               |
| vgaA-02      | 47C |       |       |      | LowEfficiency, CtIsSmall, S: |
| vgb-01       | 47C | 32.95 | 87.02 | 1.87 |                              |
| vgbB-01      | 47C |       |       |      | LowEfficiency, CtIsSmall, S: |
| vgbB-02      | 47C |       |       |      | CurveFitFailed               |
| yceE/mdtG-0  | 47C | 34.11 | 76.47 | 2.17 |                              |
| yceE/mdtG-0  | 47C |       |       |      | LowEfficiency, CtIsSmall, S: |
| yceL/mdtH-0  | 47C | 29.57 | 83.7  | 1.94 |                              |
| yceL/mdtH-0  | 47C |       |       |      | LowEfficiency, CtIsSmall, Ci |
| yceL/mdtH-0  | 47C | 36.52 | 89.29 | 1.8  |                              |
| yidY/mdtL-01 | 47C | 32.17 | 80.43 | 1.94 |                              |
| yidY/mdtL-02 | 47C |       |       |      | LowEfficiency, CtIsSmall, S: |































| Assay          | Sample | Ct | Tm    | Efficiency | flag                         |
|----------------|--------|----|-------|------------|------------------------------|
| 16S rRNA       | 48A    |    | 13.01 | 82.36      | 2.02                         |
| aac            | 48A    |    | 31.91 | 80.9       | 1.64 MultipleMeltPeaks       |
| aac(6')-Ib(akz | 48A    |    |       |            | NoAmplification              |
| aac(6')-Ib(akz | 48A    |    | 32.74 | 86.05      | 1.96                         |
| aac(6')-Ib(akz | 48A    |    | 35.68 | 87.43      | 1.84 MultipleMeltPeaks       |
| aac(6')-II     | 48A    |    |       |            | NoAmplification              |
| aac(6')I1      | 48A    |    |       |            | NoAmplification              |
| aacA/aphD      | 48A    |    |       |            | NoAmplification              |
| aacC           | 48A    |    | 30.58 | 88.8       | 1.91                         |
| aacC1          | 48A    |    |       |            | NoAmplification              |
| aacC2          | 48A    |    |       |            | NoAmplification              |
| aacC4          | 48A    |    | 32.38 | 89.98      | 1.97 MultipleMeltPeaks       |
| aadA-01        | 48A    |    | 30.33 | 81.95      | 1.88                         |
| aadA-02        | 48A    |    |       |            | CtIsSmall, CurveFitFailed, F |
| aadA-1-01      | 48A    |    |       |            | NoAmplification              |
| aadA-1-02      | 48A    |    |       |            | NoAmplification              |
| aadA1          | 48A    |    | 32.6  | 83.4       | 2.14                         |
| aadA2-01       | 48A    |    |       |            | NoAmplification              |
| aadA2-02       | 48A    |    | 31.6  | 75.4       | 1.94                         |
| aadA2-03       | 48A    |    |       |            | NoAmplification              |
| aadA5-01       | 48A    |    | 32.55 | 87.54      | 1.89                         |
| aadA5-02       | 48A    |    | 35.37 | 83.62      | 1.93                         |
| aadA9-01       | 48A    |    | 36.55 | 88.06      | 1.99                         |
| aadA9-02       | 48A    |    |       |            | NoAmplification              |
| aadD           | 48A    |    |       |            | NoAmplification              |
| aadE           | 48A    |    |       |            | NoAmplification              |
| acrA-01        | 48A    |    | 29.76 | 88.85      | 1.94                         |
| acrA-02        | 48A    |    |       |            | NoAmplification              |
| acrA-03        | 48A    |    | 35.59 | 86.68      | 1.81 MultipleMeltPeaks       |
| acrA-04        | 48A    |    | 30.64 | 80.64      | 1.88                         |
| acrA-05        | 48A    |    | 29    | 88.82      | 1.97                         |
| acrB-01        | 48A    |    | 37.74 | 75.66      | 1.91                         |
| acrF           | 48A    |    |       |            | NoAmplification              |
| acrR-01        | 48A    |    |       |            | NoAmplification              |
| acrR-02        | 48A    |    | 35.91 | 86.93      | 1.88 MultipleMeltPeaks       |
| Actin          | 48A    |    | 19.71 | 87.11      | 2.01                         |
| adeA           | 48A    |    |       |            | NoAmplification              |
| ampC-01        | 48A    |    | 33.53 | 80.86      | 1.74                         |
| ampC-02        | 48A    |    | 37.1  | 79.19      | 1.9                          |
| ampC-04        | 48A    |    | 33.17 | 78.48      | 1.75                         |
| ampC-05        | 48A    |    |       |            | NoAmplification              |
| ampC-06        | 48A    |    |       |            | NoAmplification              |
| ampC-07        | 48A    |    | 37.19 | 88.5       | 1.88                         |
| ampC-09        | 48A    |    |       |            | NoAmplification              |
| ampC/blaDH     | 48A    |    | 31    | 85.23      | 1.92 MultipleMeltPeaks       |

|                            |     |       |       |      |                   |
|----------------------------|-----|-------|-------|------|-------------------|
| aph                        | 48A |       |       |      | NoAmplification   |
| aph(2')-Id-01              | 48A |       |       |      | NoAmplification   |
| aph(2')-Id-02              | 48A |       |       |      | NoAmplification   |
| aph6ia                     | 48A |       |       |      | NoAmplification   |
| aphA1(aka k <sub>z</sub> ) | 48A |       |       |      | NoAmplification   |
| bacA-01                    | 48A |       |       |      | CurveFitFailed    |
| bacA-02                    | 48A | 29.69 | 83.49 | 1.73 |                   |
| BETA-globin                | 48A | 20.45 | 84.25 | 1.94 |                   |
| bla-ACC-1                  | 48A | 32.19 | 87.07 | 1.94 |                   |
| bla-L1                     | 48A | 33.73 | 85.4  | 1.92 | MultipleMeltPeaks |
| bla1                       | 48A |       |       |      | CurveFitFailed    |
| blaCMY                     | 48A | 32.07 | 80.14 | 1.83 |                   |
| blaCMY2-01                 | 48A | 31.9  | 75.43 | 2.02 |                   |
| blaCMY2-02                 | 48A | 30.08 | 88.81 | 1.94 |                   |
| blaCTX-M-01                | 48A | 37.96 | 86.65 | 1.73 |                   |
| blaCTX-M-02                | 48A | 38.82 | 80.65 | 1.68 | MultipleMeltPeaks |
| blaCTX-M-03                | 48A |       |       |      | NoAmplification   |
| blaCTX-M-04                | 48A | 31.5  | 87.92 | 1.77 |                   |
| blaCTX-M-05                | 48A |       |       |      | NoAmplification   |
| blaCTX-M-06                | 48A |       |       |      | NoAmplification   |
| blaGES                     | 48A |       |       |      | NoAmplification   |
| blaIMP-01                  | 48A |       |       |      | NoAmplification   |
| blaIMP-02                  | 48A |       |       |      | NoAmplification   |
| blaMOX/blaC                | 48A |       |       |      | NoAmplification   |
| blaOCH                     | 48A |       |       |      | NoAmplification   |
| blaOKP                     | 48A |       |       |      | NoAmplification   |
| blaOXA1/blaC               | 48A |       |       |      | NoAmplification   |
| blaOXA10-01                | 48A |       |       |      | NoAmplification   |
| blaOXA10-02                | 48A |       |       |      | NoAmplification   |
| blaOXY                     | 48A |       |       |      | NoAmplification   |
| blaPAO                     | 48A |       |       |      | NoAmplification   |
| blaPER                     | 48A |       |       |      | NoAmplification   |
| blaPSE                     | 48A |       |       |      | NoAmplification   |
| blaROB                     | 48A |       |       |      | NoAmplification   |
| blaSFO                     | 48A | 30.6  | 89.92 | 1.88 |                   |
| blaSHV-01                  | 48A |       |       |      | NoAmplification   |
| blaSHV-02                  | 48A |       |       |      | NoAmplification   |
| blaTEM                     | 48A | 20.5  | 79.28 | 1.84 |                   |
| blaTLA                     | 48A |       |       |      | NoAmplification   |
| blaVEB                     | 48A |       |       |      | NoAmplification   |
| blaVIM                     | 48A |       |       |      | NoAmplification   |
| blaZ                       | 48A |       |       |      | NoAmplification   |
| carB                       | 48A |       |       |      | NoAmplification   |
| catA1                      | 48A |       |       |      | NoAmplification   |
| catB3                      | 48A | 33.92 | 87.62 | 2.01 |                   |
| catB8                      | 48A |       |       |      | NoAmplification   |

|            |     |       |       |      |                   |
|------------|-----|-------|-------|------|-------------------|
| ceoA       | 48A | 28.07 | 82.29 | 1.98 |                   |
| cepA       | 48A |       |       |      | NoAmplification   |
| cfiA       | 48A | 34.28 | 81.16 | 1.92 |                   |
| cfr        | 48A |       |       |      | NoAmplification   |
| cfxA       | 48A | 17.57 | 77.73 | 1.98 |                   |
| cmeA       | 48A |       |       |      | NoAmplification   |
| cmlA1-01   | 48A |       |       |      | NoAmplification   |
| cmlA1-02   | 48A | 37.36 | 88.68 | 1.68 |                   |
| cmr        | 48A |       |       |      | NoAmplification   |
| cmx(A)     | 48A |       |       |      | NoAmplification   |
| cphA-01    | 48A | 33.72 | 85.45 | 1.93 |                   |
| cphA-02    | 48A | 33.32 | 82.5  | 1.97 |                   |
| dfrA1      | 48A |       |       |      | NoAmplification   |
| dfrA12     | 48A | 36.65 | 79.6  | 1.94 |                   |
| emrD       | 48A |       |       |      | NoAmplification   |
| ereA       | 48A |       |       |      | NoAmplification   |
| ereB       | 48A | 33.5  | 85.82 | 2.13 |                   |
| erm(34)    | 48A | 35.41 | 80.53 | 1.92 |                   |
| erm(35)    | 48A |       |       |      | NoAmplification   |
| erm(36)    | 48A | 31.12 | 86.29 | 2.11 |                   |
| ermA       | 48A |       |       |      | CurveFitFailed    |
| ermA/ermTR | 48A |       |       |      | NoAmplification   |
| ermB       | 48A | 19.01 | 75.02 | 2.24 |                   |
| ermC       | 48A | 27.42 | 75.4  | 2.2  |                   |
| ermF       | 48A | 30.21 | 74.37 | 1.93 |                   |
| ermJ/ermD  | 48A |       |       |      | NoAmplification   |
| ermK-01    | 48A | 32.71 | 75.03 | 1.98 |                   |
| ermK-02    | 48A | 35.79 | 75.81 | 1.99 | MultipleMeltPeaks |
| ermT-01    | 48A |       |       |      | NoAmplification   |
| ermT-02    | 48A | 36.53 | 73.36 | 1.97 |                   |
| ermX       | 48A | 17.5  | 84.08 | 1.87 |                   |
| ermY       | 48A |       |       |      | NoAmplification   |
| fabK       | 48A | 19    | 77.45 | 1.84 |                   |
| floR       | 48A | 37.19 | 88.71 | 1.66 | MultipleMeltPeaks |
| folA       | 48A |       |       |      | NoAmplification   |
| fosB       | 48A |       |       |      | CurveFitFailed    |
| fosX       | 48A |       |       |      | NoAmplification   |
| fox5       | 48A | 28.23 | 86.36 | 1.92 |                   |
| imiR       | 48A |       |       |      | NoAmplification   |
| ImrA-01    | 48A |       |       |      | NoAmplification   |
| intl       | 48A | 31.62 | 84.88 | 1.85 |                   |
| intl1      | 48A | 25.13 | 83.97 | 1.82 |                   |
| IS613      | 48A | 24.81 | 79.95 | 2.05 |                   |
| lnuA-01    | 48A |       |       |      | NoAmplification   |
| lnuB-01    | 48A |       |       |      | NoAmplification   |
| lnuB-02    | 48A |       |       |      | NoAmplification   |

|                |     |       |       |      |                              |
|----------------|-----|-------|-------|------|------------------------------|
| lnuC           | 48A |       |       |      | CtIsSmall, CurveFitFailed, F |
| marR-01        | 48A | 34.52 | 85.22 | 1.96 |                              |
| matA/mel       | 48A | 15.04 | 77.34 | 1.79 |                              |
| mdet1          | 48A |       |       |      | NoAmplification              |
| mdtA           | 48A |       |       |      | NoAmplification              |
| mdtE/yhiU      | 48A | 34.73 | 85.88 | 1.89 | MultipleMeltPeaks            |
| mecA           | 48A |       |       |      | NoAmplification              |
| mefA           | 48A | 14.47 | 80.63 | 1.9  |                              |
| mepA           | 48A |       |       |      | NoAmplification              |
| mexA           | 48A |       |       |      | NoAmplification              |
| mexD           | 48A |       |       |      | NoAmplification              |
| mexE           | 48A | 31.21 | 83.02 | 1.86 |                              |
| mexF           | 48A | 28.87 | 87.17 | 2.17 | MultipleMeltPeaks            |
| mphA-01        | 48A | 30.33 | 90.52 | 2.01 | MultipleMeltPeaks            |
| mphA-02        | 48A |       |       |      | NoAmplification              |
| mphB           | 48A |       |       |      | NoAmplification              |
| mphC           | 48A |       |       |      | NoAmplification              |
| msrA-01        | 48A | 27.42 | 76.43 | 2.04 |                              |
| msrC-01        | 48A |       |       |      | NoAmplification              |
| mtrC-01        | 48A |       |       |      | NoAmplification              |
| mtrC-02        | 48A |       |       |      | NoAmplification              |
| mtrD-02        | 48A | 27.45 | 83.01 | 1.91 |                              |
| mtrD-03        | 48A | 25.92 | 82.3  | 1.96 |                              |
| NDM1           | 48A |       |       |      | NoAmplification              |
| nimE           | 48A | 36.74 | 75.24 | 2.07 |                              |
| nisB           | 48A |       |       |      | NoAmplification              |
| oleC           | 48A | 33.05 | 91.95 | 1.98 |                              |
| oprD           | 48A | 27.3  | 91.81 | 2.01 |                              |
| oprJ           | 48A | 31.34 | 90.85 | 1.77 | MultipleMeltPeaks            |
| pbp            | 48A |       |       |      | NoAmplification              |
| pbp2x          | 48A |       |       |      | LowEfficiency, CurveFitFail  |
| Pbp5           | 48A |       |       |      | NoAmplification              |
| penA           | 48A |       |       |      | NoAmplification              |
| pikR1          | 48A |       |       |      | NoAmplification              |
| pikR2          | 48A | 30.57 | 85.18 | 1.98 | MultipleMeltPeaks            |
| pmrA           | 48A | 19.36 | 79.73 | 2.09 |                              |
| pncA           | 48A | 24.92 | 89.58 | 1.92 |                              |
| putative multi | 48A |       |       |      | NoAmplification              |
| qac            | 48A | 37.15 | 86.06 | 1.95 | MultipleMeltPeaks            |
| qacA           | 48A |       |       |      | NoAmplification              |
| qacA/qacB      | 48A |       |       |      | NoAmplification              |
| qacEdelta1-0   | 48A |       |       |      | CurveFitFailed               |
| qacEdelta1-0   | 48A | 33.12 | 80.34 | 1.92 | MultipleMeltPeaks            |
| qacH-01        | 48A | 33.34 | 85.62 | 2.04 | MultipleMeltPeaks            |
| qacH-02        | 48A | 37.57 | 83.93 | 1.72 |                              |
| qnrA           | 48A |       |       |      | NoAmplification              |



|              |     |       |       |      |                   |
|--------------|-----|-------|-------|------|-------------------|
| rarD-02      | 48A |       |       |      | NoAmplification   |
| sat4         | 48A | 27.62 | 80.25 | 1.64 |                   |
| sdeB         | 48A | 36.66 | 85.77 | 1.92 |                   |
| spcN-01      | 48A |       |       |      | NoAmplification   |
| speA         | 48A |       |       |      | NoAmplification   |
| str          | 48A |       |       |      | NoAmplification   |
| strA         | 48A |       |       |      | NoAmplification   |
| strB         | 48A | 28.93 | 83.4  | 1.45 |                   |
| sul1         | 48A |       |       |      | NoAmplification   |
| sul2         | 48A |       |       |      | NoAmplification   |
| sulA/foIP-01 | 48A | 17.92 | 81.26 | 2.08 |                   |
| sulA/foIP-03 | 48A | 18.13 | 83.2  | 2.1  |                   |
| tet(32)      | 48A | 20.07 | 81.25 | 1.77 |                   |
| tet(34)      | 48A | 32.56 | 75.45 | 1.93 |                   |
| tet(35)      | 48A |       |       |      | NoAmplification   |
| tet(36)-A    | 48A |       |       |      | NoAmplification   |
| tet(36)-B    | 48A |       |       |      | NoAmplification   |
| tet(37)      | 48A | 34.47 | 86.72 | 1.83 |                   |
| tetA-01      | 48A | 32.74 | 85.11 | 1.9  |                   |
| tetA-02      | 48A | 32.28 | 85.42 | 1.98 |                   |
| tetB-01      | 48A | 24.06 | 79.64 | 1.75 |                   |
| tetB-02      | 48A | 23.84 | 79.81 | 2.03 |                   |
| tetC-01      | 48A | 24.12 | 74.88 | 1.68 |                   |
| tetC-02      | 48A | 24.44 | 76.07 | 2.09 |                   |
| tetD-01      | 48A |       |       |      | NoAmplification   |
| tetD-02      | 48A | 31.52 | 77.8  | 1.88 |                   |
| tetE         | 48A |       |       |      | NoAmplification   |
| tetG-01      | 48A | 35.11 | 91.15 | 1.96 | MultipleMeltPeaks |
| tetG-02      | 48A | 32.2  | 85.07 | 1.88 |                   |
| tetH         | 48A |       |       |      | NoAmplification   |
| tetJ         | 48A |       |       |      | NoAmplification   |
| tetK         | 48A | 35.17 | 72.21 | 1.91 |                   |
| tetL-01      | 48A |       |       |      | CurveFitFailed    |
| tetL-02      | 48A | 31.39 | 85.32 | 1.89 |                   |
| tetM-01      | 48A | 14.89 | 75.73 | 2.26 |                   |
| tetM-02      | 48A | 14.66 | 77.52 | 2.3  |                   |
| tetO-01      | 48A | 18.39 | 77.07 | 2.06 |                   |
| tetPA        | 48A |       |       |      | NoAmplification   |
| tetPB-01     | 48A | 36.84 | 79.48 | 1.9  |                   |
| tetPB-02     | 48A | 28.75 | 84.9  | 2.08 |                   |
| tetPB-03     | 48A |       |       |      | NoAmplification   |
| tetPB-05     | 48A |       |       |      | NoAmplification   |
| tetQ         | 48A | 17.76 | 76.02 | 2.14 |                   |
| tetR-02      | 48A | 33.36 | 86    | 1.59 |                   |
| tetR-03      | 48A | 23.72 | 76.13 | 2.01 |                   |
| tetS         | 48A |       |       |      | NoAmplification   |

|             |     |       |       |      |                             |
|-------------|-----|-------|-------|------|-----------------------------|
| tetT        | 48A |       |       |      | NoAmplification             |
| tetU-01     | 48A |       |       |      | NoAmplification             |
| tetV        | 48A |       |       |      | NoAmplification             |
| tetW-01     | 48A | 18.56 | 82.12 | 2.07 |                             |
| tetX        | 48A |       |       |      | NoAmplification             |
| tnpA-01     | 48A | 29.4  | 85.19 | 1.71 |                             |
| tnpA-02     | 48A |       |       |      | NoAmplification             |
| tnpA-03     | 48A |       |       |      | NoAmplification             |
| tnpA-04     | 48A |       |       |      | NoAmplification             |
| tnpA-05     | 48A | 29.15 | 80.63 | 1.61 |                             |
| tnpA-07     | 48A |       |       |      | NoAmplification             |
| tolC-01     | 48A |       |       |      | NoAmplification             |
| tolC-02     | 48A | 30.81 | 83.76 | 1.92 | MultipleMeltPeaks           |
| tolC-03     | 48A |       |       |      | NoAmplification             |
| Tp614       | 48A |       |       |      | NoAmplification             |
| ttgA        | 48A |       |       |      | LowEfficiency, CtlSmall, S: |
| ttgB        | 48A | 35.08 | 82.75 | 1.88 | MultipleMeltPeaks           |
| vanA        | 48A |       |       |      | NoAmplification             |
| vanB-01     | 48A |       |       |      | NoAmplification             |
| vanC-01     | 48A | 33.82 | 81.73 | 2.14 |                             |
| vanC-02     | 48A |       |       |      | NoAmplification             |
| vanC-03     | 48A | 24.38 | 85.82 | 1.94 |                             |
| vanC1       | 48A |       |       |      | NoAmplification             |
| vanC2/vanC3 | 48A | 34.43 | 85.03 | 2.07 |                             |
| vanG        | 48A |       |       |      | NoAmplification             |
| vanHB       | 48A | 34.09 | 82.94 | 1.89 |                             |
| vanHD       | 48A |       |       |      | NoAmplification             |
| vanRA-01    | 48A |       |       |      | NoAmplification             |
| vanRA-02    | 48A |       |       |      | NoAmplification             |
| vanRB       | 48A | 31.77 | 87.58 | 2.04 |                             |
| vanRC       | 48A |       |       |      | NoAmplification             |
| vanRC4      | 48A |       |       |      | NoAmplification             |
| vanRD       | 48A |       |       |      | BadR2, CtlSmall, Saturatio  |
| vanSA       | 48A |       |       |      | NoAmplification             |
| vanSB       | 48A | 34.28 | 83.38 | 2.45 | MultipleMeltPeaks           |
| vanSC-01    | 48A | 35.4  | 77.28 | 2.09 | MultipleMeltPeaks           |
| vanSC-02    | 48A |       |       |      | NoAmplification             |
| vanTC-01    | 48A |       |       |      | NoAmplification             |
| vanTC-02    | 48A | 37.06 | 86.35 | 1.65 |                             |
| vanTE       | 48A |       |       |      | NoAmplification             |
| vanTG       | 48A |       |       |      | NoAmplification             |
| vanWB       | 48A |       |       |      | BadR2, CtlSmall, Saturatio  |
| vanWG       | 48A |       |       |      | NoAmplification             |
| vanXA       | 48A |       |       |      | NoAmplification             |
| vanXB       | 48A |       |       |      | NoAmplification             |
| vanXD       | 48A | 36.81 | 74.34 | 1.97 |                             |

|              |     |       |       |      |                   |
|--------------|-----|-------|-------|------|-------------------|
| vanYB        | 48A |       |       |      | NoAmplification   |
| vanYD-01     | 48A | 33.01 | 82.24 | 1.76 |                   |
| vanYD-02     | 48A |       |       |      | NoAmplification   |
| vatB-01      | 48A |       |       |      | NoAmplification   |
| vatB-02      | 48A |       |       |      | CurveFitFailed    |
| vatC-01      | 48A | 36.51 | 81.32 | 1.87 |                   |
| vatC-02      | 48A | 35.37 | 83.24 | 1.9  | MultipleMeltPeaks |
| vatE-01      | 48A | 32.84 | 76.41 | 2.03 |                   |
| vatE-02      | 48A | 35.47 | 76.05 | 2.15 |                   |
| vgaA-01      | 48A |       |       |      | CurveFitFailed    |
| vgaA-02      | 48A |       |       |      | NoAmplification   |
| vgb-01       | 48A |       |       |      | NoAmplification   |
| vgbB-01      | 48A |       |       |      | NoAmplification   |
| vgbB-02      | 48A |       |       |      | NoAmplification   |
| yceE/mdtG-0  | 48A |       |       |      | NoAmplification   |
| yceE/mdtG-0  | 48A |       |       |      | NoAmplification   |
| yceL/mdtH-0  | 48A | 32.8  | 80.55 | 1.94 | MultipleMeltPeaks |
| yceL/mdtH-0  | 48A |       |       |      | NoAmplification   |
| yceL/mdtH-0  | 48A | 37.68 | 86.28 | 1.85 |                   |
| yidY/mdtL-01 | 48A |       |       |      | NoAmplification   |
| yidY/mdtL-02 | 48A |       |       |      | NoAmplification   |































| Assay          | Sample | Ct | Tm    | Efficiency | flag                   |
|----------------|--------|----|-------|------------|------------------------|
| 16S rRNA       | 48B    |    | 17.07 | 82.23      | 1.99                   |
| aac            | 48B    |    | 28.62 | 81.28      | 1.9 MultipleMeltPeaks  |
| aac(6')-Ib(akz | 48B    |    |       |            | NoAmplification        |
| aac(6')-Ib(akz | 48B    |    | 30.21 | 86.03      | 1.96                   |
| aac(6')-Ib(akz | 48B    |    | 31.52 | 87.23      | 1.91                   |
| aac(6')-II     | 48B    |    | 33.04 | 84.12      | 1.75 MultipleMeltPeaks |
| aac(6')I1      | 48B    |    |       |            | CurveFitFailed         |
| aacA/aphD      | 48B    |    | 33.45 | 77.86      | 2.04                   |
| aacC           | 48B    |    | 30.55 | 88.71      | 1.92 MultipleMeltPeaks |
| aacC1          | 48B    |    |       |            | NoAmplification        |
| aacC2          | 48B    |    |       |            | NoAmplification        |
| aacC4          | 48B    |    | 33.37 | 83.54      | 1.99                   |
| aadA-01        | 48B    |    |       |            | NoAmplification        |
| aadA-02        | 48B    |    | 37.16 | 80.41      | 1.77                   |
| aadA-1-01      | 48B    |    | 32.69 | 82.55      | 1.98 MultipleMeltPeaks |
| aadA-1-02      | 48B    |    |       |            | NoAmplification        |
| aadA1          | 48B    |    | 30.64 | 85.46      | 2.12                   |
| aadA2-01       | 48B    |    | 37    | 89.22      | 1.72                   |
| aadA2-02       | 48B    |    | 31.07 | 75.36      | 1.95                   |
| aadA2-03       | 48B    |    |       |            | NoAmplification        |
| aadA5-01       | 48B    |    | 33.95 | 88.63      | 1.93                   |
| aadA5-02       | 48B    |    | 32.47 | 83.6       | 1.95                   |
| aadA9-01       | 48B    |    | 36.22 | 81.58      | 1.78 MultipleMeltPeaks |
| aadA9-02       | 48B    |    |       |            | NoAmplification        |
| aadD           | 48B    |    |       |            | NoAmplification        |
| aadE           | 48B    |    |       |            | NoAmplification        |
| acrA-01        | 48B    |    | 30.87 | 88.76      | 1.86                   |
| acrA-02        | 48B    |    | 34.51 | 83.53      | 1.9 MultipleMeltPeaks  |
| acrA-03        | 48B    |    |       |            | NoAmplification        |
| acrA-04        | 48B    |    | 29.65 | 80.78      | 1.94                   |
| acrA-05        | 48B    |    | 30.07 | 88.37      | 1.9                    |
| acrB-01        | 48B    |    |       |            | NoAmplification        |
| acrF           | 48B    |    | 23.55 | 82.88      | 1.8                    |
| acrR-01        | 48B    |    | 34.63 | 87.8       | 1.86 MultipleMeltPeaks |
| acrR-02        | 48B    |    | 35.76 | 83.31      | 1.86 MultipleMeltPeaks |
| Actin          | 48B    |    | 19.55 | 86.88      | 1.99                   |
| adeA           | 48B    |    | 32.53 | 86.87      | 1.91                   |
| ampC-01        | 48B    |    | 29.66 | 85.29      | 2                      |
| ampC-02        | 48B    |    | 36.42 | 85.34      | 1.84                   |
| ampC-04        | 48B    |    | 31.58 | 78.54      | 1.71 MultipleMeltPeaks |
| ampC-05        | 48B    |    |       |            | NoAmplification        |
| ampC-06        | 48B    |    | 37.76 | 84.03      | 1.81                   |
| ampC-07        | 48B    |    | 31.76 | 88.63      | 1.86                   |
| ampC-09        | 48B    |    |       |            | NoAmplification        |
| ampC/blaDH     | 48B    |    | 28.25 | 84.65      | 2                      |

|                          |     |       |       |                        |
|--------------------------|-----|-------|-------|------------------------|
| aph                      | 48B |       |       | NoAmplification        |
| aph(2')-Id-01            | 48B |       |       | NoAmplification        |
| aph(2')-Id-02            | 48B |       |       | NoAmplification        |
| aph6ia                   | 48B | 34.13 | 78.07 | 1.96                   |
| aphA1(aka k <sub>z</sub> | 48B |       |       | NoAmplification        |
| bacA-01                  | 48B |       |       | NoAmplification        |
| bacA-02                  | 48B | 31.51 | 83.29 | 1.76                   |
| BETA-globin              | 48B | 20.69 | 84.04 | 1.97                   |
| bla-ACC-1                | 48B | 33.1  | 88.56 | 2 MultipleMeltPeaks    |
| bla-L1                   | 48B | 30.15 | 85.59 | 1.88                   |
| bla1                     | 48B |       |       | NoAmplification        |
| blaCMY                   | 48B |       |       | NoAmplification        |
| blaCMY2-01               | 48B | 33.75 | 83.27 | 2.07                   |
| blaCMY2-02               | 48B | 27.76 | 85.5  | 2.06 MultipleMeltPeaks |
| blaCTX-M-01              | 48B |       |       | NoAmplification        |
| blaCTX-M-02              | 48B | 30.51 | 85.89 | 1.9                    |
| blaCTX-M-03              | 48B |       |       | NoAmplification        |
| blaCTX-M-04              | 48B | 34.52 | 87.83 | 1.79 MultipleMeltPeaks |
| blaCTX-M-05              | 48B |       |       | NoAmplification        |
| blaCTX-M-06              | 48B |       |       | NoAmplification        |
| blaGES                   | 48B |       |       | NoAmplification        |
| blaIMP-01                | 48B |       |       | NoAmplification        |
| blaIMP-02                | 48B | 37.83 | 74.21 | 1.92                   |
| blaMOX/blaC              | 48B |       |       | NoAmplification        |
| blaOCH                   | 48B |       |       | NoAmplification        |
| blaOKP                   | 48B |       |       | NoAmplification        |
| blaOXA1/blaC             | 48B |       |       | NoAmplification        |
| blaOXA10-01              | 48B |       |       | NoAmplification        |
| blaOXA10-02              | 48B | 35.18 | 81.48 | 1.88                   |
| blaOXY                   | 48B | 35.52 | 88.63 | 1.75                   |
| blaPAO                   | 48B |       |       | NoAmplification        |
| blaPER                   | 48B |       |       | NoAmplification        |
| blaPSE                   | 48B |       |       | NoAmplification        |
| blaROB                   | 48B |       |       | NoAmplification        |
| blaSFO                   | 48B | 30    | 89.65 | 1.95                   |
| blaSHV-01                | 48B | 33.28 | 89.35 | 1.98                   |
| blaSHV-02                | 48B |       |       | NoAmplification        |
| blaTEM                   | 48B | 23.38 | 79.12 | 1.91                   |
| blaTLA                   | 48B |       |       | NoAmplification        |
| blaVEB                   | 48B |       |       | NoAmplification        |
| blaVIM                   | 48B |       |       | NoAmplification        |
| blaZ                     | 48B | 29.8  | 73.27 | 1.99                   |
| carB                     | 48B |       |       | NoAmplification        |
| catA1                    | 48B |       |       | NoAmplification        |
| catB3                    | 48B | 34.81 | 87.53 | 1.85                   |
| catB8                    | 48B | 28.36 | 82.32 | 2.03                   |

|            |     |       |       |      |                              |
|------------|-----|-------|-------|------|------------------------------|
| ceoA       | 48B | 26.22 | 86.39 | 1.95 | MultipleMeltPeaks            |
| cepA       | 48B |       |       |      | NoAmplification              |
| cfiA       | 48B | 30.78 | 88.56 | 1.92 |                              |
| cfr        | 48B |       |       |      | NoAmplification              |
| cfxA       | 48B | 26.05 | 77.5  | 2    |                              |
| cmeA       | 48B | 35.76 | 82.46 | 1.82 | MultipleMeltPeaks            |
| cmlA1-01   | 48B | 37.5  | 87.57 | 1.84 |                              |
| cmlA1-02   | 48B | 35.63 | 83.03 | 1.78 |                              |
| cmr        | 48B |       |       |      | NoAmplification              |
| cmx(A)     | 48B | 24.61 | 84.54 | 2.01 | MultipleMeltPeaks            |
| cphA-01    | 48B | 31.3  | 85.67 | 1.94 |                              |
| cphA-02    | 48B | 34.88 | 82.42 | 1.96 |                              |
| dfrA1      | 48B | 34.66 | 81.49 | 1.97 |                              |
| dfrA12     | 48B | 34.93 | 88.21 | 1.86 | MultipleMeltPeaks            |
| emrD       | 48B |       |       |      | NoAmplification              |
| ereA       | 48B | 37.26 | 83.51 | 1.78 |                              |
| ereB       | 48B | 35.19 | 84.69 | 1.91 | MultipleMeltPeaks            |
| erm(34)    | 48B |       |       |      | NoAmplification              |
| erm(35)    | 48B |       |       |      | NoAmplification              |
| erm(36)    | 48B | 31.37 | 84.77 | 1.85 |                              |
| ermA       | 48B |       |       |      | NoAmplification              |
| ermA/ermTR | 48B |       |       |      | NoAmplification              |
| ermB       | 48B | 23.69 | 74.89 | 2.16 |                              |
| ermC       | 48B | 34.3  | 88.45 | 1.98 |                              |
| ermF       | 48B |       |       |      | NoAmplification              |
| ermJ/ermD  | 48B |       |       |      | NoAmplification              |
| ermK-01    | 48B | 31.43 | 75.12 | 1.96 |                              |
| ermK-02    | 48B | 33.41 | 87.91 | 1.95 | MultipleMeltPeaks            |
| ermT-01    | 48B |       |       |      | NoAmplification              |
| ermT-02    | 48B | 36.98 | 78.41 | 1.91 |                              |
| ermX       | 48B | 23.7  | 83.84 | 1.86 |                              |
| ermY       | 48B |       |       |      | NoAmplification              |
| fabK       | 48B | 20.61 | 77.58 | 2.19 |                              |
| floR       | 48B |       |       |      | NoAmplification              |
| folA       | 48B |       |       |      | NoAmplification              |
| fosB       | 48B |       |       |      | LowEfficiency, CtIsSmall, S: |
| fosX       | 48B |       |       |      | NoAmplification              |
| fox5       | 48B | 25.77 | 87.65 | 1.98 |                              |
| imiR       | 48B |       |       |      | NoAmplification              |
| ImrA-01    | 48B | 35.91 | 84.63 | 1.86 | MultipleMeltPeaks            |
| intl       | 48B | 29.17 | 84.86 | 2    |                              |
| intl1      | 48B | 18.97 | 87.48 | 1.98 |                              |
| IS613      | 48B | 26.57 | 80.28 | 2.03 |                              |
| lnuA-01    | 48B |       |       |      | NoAmplification              |
| lnuB-01    | 48B |       |       |      | NoAmplification              |
| lnuB-02    | 48B |       |       |      | NoAmplification              |

|                |     |       |       |      |                   |
|----------------|-----|-------|-------|------|-------------------|
| lnuC           | 48B | 34.1  | 84.1  | 1.76 |                   |
| marR-01        | 48B | 32.41 | 85.29 | 1.91 |                   |
| matA/mel       | 48B | 18.67 | 77.55 | 2.04 |                   |
| mdet1          | 48B |       |       |      | NoAmplification   |
| mdtA           | 48B | 35.21 | 81.87 | 1.67 | MultipleMeltPeaks |
| mdtE/yhiU      | 48B | 33.29 | 77.58 | 1.97 |                   |
| mecA           | 48B |       |       |      | NoAmplification   |
| mefA           | 48B | 18.08 | 80.47 | 2.01 |                   |
| mepA           | 48B | 31.49 | 84.82 | 1.87 | MultipleMeltPeaks |
| mexA           | 48B |       |       |      | NoAmplification   |
| mexD           | 48B | 33.2  | 80.03 | 1.99 |                   |
| mexE           | 48B | 37.93 | 79.06 | 1.71 | MultipleMeltPeaks |
| mexF           | 48B | 27.47 | 85.07 | 2.18 |                   |
| mphA-01        | 48B | 30.03 | 86.92 | 1.97 |                   |
| mphA-02        | 48B | 29.34 | 86.76 | 1.92 |                   |
| mphB           | 48B | 35.86 | 84.36 | 1.87 | MultipleMeltPeaks |
| mphC           | 48B |       |       |      | NoAmplification   |
| msrA-01        | 48B |       |       |      | NoAmplification   |
| msrC-01        | 48B |       |       |      | NoAmplification   |
| mtrC-01        | 48B |       |       |      | NoAmplification   |
| mtrC-02        | 48B | 33.76 | 84.44 | 1.93 |                   |
| mtrD-02        | 48B | 26.96 | 82.99 | 1.92 |                   |
| mtrD-03        | 48B | 31.28 | 82.03 | 1.96 |                   |
| NDM1           | 48B |       |       |      | NoAmplification   |
| nimE           | 48B |       |       |      | NoAmplification   |
| nisB           | 48B | 32.51 | 75.56 | 1.94 |                   |
| oleC           | 48B | 35.85 | 89.95 | 1.85 |                   |
| oprD           | 48B | 27.36 | 86.64 | 2.03 | MultipleMeltPeaks |
| oprJ           | 48B | 37.69 | 76.91 | 1.75 | MultipleMeltPeaks |
| pbp            | 48B |       |       |      | NoAmplification   |
| pbp2x          | 48B | 20.47 | 75.16 | 1.91 |                   |
| Pbp5           | 48B |       |       |      | NoAmplification   |
| penA           | 48B |       |       |      | NoAmplification   |
| pikR1          | 48B |       |       |      | NoAmplification   |
| pikR2          | 48B | 29.57 | 84.88 | 2.06 |                   |
| pmrA           | 48B | 19.99 | 79.72 | 2.09 |                   |
| pncA           | 48B | 32.46 | 81.89 | 1.59 | MultipleMeltPeaks |
| putative multi | 48B | 33.12 | 84.27 | 1.98 |                   |
| qac            | 48B | 35.86 | 73.24 | 1.94 |                   |
| qacA           | 48B | 33.61 | 70.26 | 1.76 |                   |
| qacA/qacB      | 48B | 34.76 | 87.48 | 1.88 |                   |
| qacEdelta1-0   | 48B |       |       |      | NoAmplification   |
| qacEdelta1-0   | 48B | 30.11 | 77.32 | 1.85 |                   |
| qacH-01        | 48B | 30.43 | 89.26 | 1.97 | MultipleMeltPeaks |
| qacH-02        | 48B | 34.49 | 83.98 | 1.65 |                   |
| qnrA           | 48B | 36.33 | 79.45 | 1.98 | MultipleMeltPeaks |

|              |     |       |       |      |                   |
|--------------|-----|-------|-------|------|-------------------|
| rarD-02      | 48B |       |       |      | NoAmplification   |
| sat4         | 48B |       |       |      | NoAmplification   |
| sdeB         | 48B |       |       |      | NoAmplification   |
| spcN-01      | 48B |       |       |      | NoAmplification   |
| speA         | 48B |       |       |      | NoAmplification   |
| str          | 48B |       |       |      | NoAmplification   |
| strA         | 48B |       |       |      | NoAmplification   |
| strB         | 48B |       |       |      | NoAmplification   |
| sul1         | 48B | 33.05 | 89.81 | 1.92 |                   |
| sul2         | 48B |       |       |      | NoAmplification   |
| sulA/foIP-01 | 48B | 19.32 | 80.96 | 2    |                   |
| sulA/foIP-03 | 48B | 19.37 | 82.77 | 1.97 |                   |
| tet(32)      | 48B | 27.12 | 81.17 | 1.94 |                   |
| tet(34)      | 48B | 30.09 | 75.79 | 1.95 |                   |
| tet(35)      | 48B |       |       |      | NoAmplification   |
| tet(36)-A    | 48B |       |       |      | CurveFitFailed    |
| tet(36)-B    | 48B |       |       |      | NoAmplification   |
| tet(37)      | 48B | 30.14 | 89.22 | 1.9  |                   |
| tetA-01      | 48B | 27.83 | 85.07 | 1.96 |                   |
| tetA-02      | 48B | 35.38 | 89.88 | 1.86 |                   |
| tetB-01      | 48B | 28.23 | 86.14 | 1.92 |                   |
| tetB-02      | 48B | 28.59 | 79.6  | 2    |                   |
| tetC-01      | 48B | 28.2  | 75.2  | 2.01 |                   |
| tetC-02      | 48B | 29.16 | 75.93 | 2.05 |                   |
| tetD-01      | 48B |       |       |      | NoAmplification   |
| tetD-02      | 48B | 35.89 | 76.26 | 1.96 | MultipleMeltPeaks |
| tetE         | 48B |       |       |      | NoAmplification   |
| tetG-01      | 48B | 31.09 | 82.22 | 1.97 | MultipleMeltPeaks |
| tetG-02      | 48B | 32.73 | 85.19 | 1.96 |                   |
| tetH         | 48B |       |       |      | NoAmplification   |
| tetJ         | 48B |       |       |      | NoAmplification   |
| tetK         | 48B |       |       |      | NoAmplification   |
| tetL-01      | 48B | 34.96 | 84.74 | 1.81 | MultipleMeltPeaks |
| tetL-02      | 48B | 29.43 | 85.16 | 1.81 |                   |
| tetM-01      | 48B | 19.14 | 75.94 | 1.99 |                   |
| tetM-02      | 48B | 18.98 | 77.67 | 2.06 |                   |
| tetO-01      | 48B | 22.76 | 76.9  | 2.07 |                   |
| tetPA        | 48B |       |       |      | NoAmplification   |
| tetPB-01     | 48B |       |       |      | NoAmplification   |
| tetPB-02     | 48B | 27.75 | 84.85 | 2.05 |                   |
| tetPB-03     | 48B |       |       |      | NoAmplification   |
| tetPB-05     | 48B |       |       |      | NoAmplification   |
| tetQ         | 48B | 27.48 | 76.47 | 2.1  |                   |
| tetR-02      | 48B | 30.31 | 88.91 | 1.77 | MultipleMeltPeaks |
| tetR-03      | 48B | 27.26 | 76.02 | 1.98 |                   |
| tetS         | 48B |       |       |      | NoAmplification   |

|             |     |       |       |      |                              |
|-------------|-----|-------|-------|------|------------------------------|
| tetT        | 48B |       |       |      | NoAmplification              |
| tetU-01     | 48B |       |       |      | NoAmplification              |
| tetV        | 48B |       |       |      | NoAmplification              |
| tetW-01     | 48B | 25.61 | 81.93 | 1.99 |                              |
| tetX        | 48B |       |       |      | NoAmplification              |
| tnpA-01     | 48B | 35.04 | 79.29 | 1.98 | MultipleMeltPeaks            |
| tnpA-02     | 48B | 35.42 | 85.02 | 1.77 | MultipleMeltPeaks            |
| tnpA-03     | 48B | 33.14 | 75.5  | 2.13 |                              |
| tnpA-04     | 48B |       |       |      | NoAmplification              |
| tnpA-05     | 48B |       |       |      | NoAmplification              |
| tnpA-07     | 48B |       |       |      | NoAmplification              |
| tolC-01     | 48B | 36.32 | 81.03 | 1.81 |                              |
| tolC-02     | 48B | 28.16 | 87.57 | 1.98 | MultipleMeltPeaks            |
| tolC-03     | 48B | 30.09 | 86.99 | 1.91 | MultipleMeltPeaks            |
| Tp614       | 48B | 37.74 | 73.44 | 1.82 | MultipleMeltPeaks            |
| ttgA        | 48B |       |       |      | NoAmplification              |
| ttgB        | 48B | 34.82 | 79.27 | 1.9  | MultipleMeltPeaks            |
| vanA        | 48B |       |       |      | NoAmplification              |
| vanB-01     | 48B | 31.52 | 84.38 | 1.92 |                              |
| vanC-01     | 48B |       |       |      | NoAmplification              |
| vanC-02     | 48B |       |       |      | NoAmplification              |
| vanC-03     | 48B | 23.9  | 86.14 | 2    |                              |
| vanC1       | 48B |       |       |      | NoAmplification              |
| vanC2/vanC3 | 48B | 32.54 | 84.65 | 2.12 | MultipleMeltPeaks            |
| vanG        | 48B |       |       |      | NoAmplification              |
| vanHB       | 48B |       |       |      | NoAmplification              |
| vanHD       | 48B | 33.79 | 74.84 | 1.93 | MultipleMeltPeaks            |
| vanRA-01    | 48B |       |       |      | NoAmplification              |
| vanRA-02    | 48B |       |       |      | NoAmplification              |
| vanRB       | 48B | 32.18 | 87.54 | 1.97 |                              |
| vanRC       | 48B |       |       |      | NoAmplification              |
| vanRC4      | 48B |       |       |      | NoAmplification              |
| vanRD       | 48B |       |       |      | NoAmplification              |
| vanSA       | 48B |       |       |      | NoAmplification              |
| vanSB       | 48B | 33.65 | 74    | 1.95 |                              |
| vanSC-01    | 48B | 32.47 | 84.06 | 1.75 |                              |
| vanSC-02    | 48B |       |       |      | NoAmplification              |
| vanTC-01    | 48B |       |       |      | NoAmplification              |
| vanTC-02    | 48B | 36.38 | 78.02 | 1.75 | MultipleMeltPeaks            |
| vanTE       | 48B |       |       |      | NoAmplification              |
| vanTG       | 48B |       |       |      | NoAmplification              |
| vanWB       | 48B |       |       |      | BadR2, CtlIsSmall, Saturatio |
| vanWG       | 48B | 33.94 | 75.36 | 1.95 |                              |
| vanXA       | 48B |       |       |      | NoAmplification              |
| vanXB       | 48B |       |       |      | NoAmplification              |
| vanXD       | 48B | 32.55 | 75.03 | 1.98 |                              |

|              |     |       |       |      |                            |
|--------------|-----|-------|-------|------|----------------------------|
| vanYB        | 48B | 36.72 | 85.79 | 1.88 | MultipleMeltPeaks          |
| vanYD-01     | 48B | 32.44 | 82.7  | 1.76 |                            |
| vanYD-02     | 48B |       |       |      | NoAmplification            |
| vatB-01      | 48B |       |       |      | NoAmplification            |
| vatB-02      | 48B | 36.33 | 76.65 | 1.9  |                            |
| vatC-01      | 48B | 30.46 | 81.43 | 1.86 |                            |
| vatC-02      | 48B | 32.66 | 87.14 | 1.95 |                            |
| vatE-01      | 48B | 30.78 | 76.71 | 2.04 |                            |
| vatE-02      | 48B |       |       |      | NoAmplification            |
| vgaA-01      | 48B |       |       |      | NoAmplification            |
| vgaA-02      | 48B |       |       |      | NoAmplification            |
| vgb-01       | 48B | 32.62 | 75.06 | 1.88 |                            |
| vgbB-01      | 48B |       |       |      | NoAmplification            |
| vgbB-02      | 48B |       |       |      | NoAmplification            |
| yceE/mdtG-0  | 48B |       |       |      | BadR2, CtlSmall, Saturatio |
| yceE/mdtG-0  | 48B | 35.35 | 81.11 | 1.96 |                            |
| yceL/mdtH-0  | 48B | 30.73 | 85.57 | 1.96 | MultipleMeltPeaks          |
| yceL/mdtH-0  | 48B |       |       |      | NoAmplification            |
| yceL/mdtH-0  | 48B | 33.32 | 77.08 | 1.96 |                            |
| yidY/mdtL-01 | 48B | 31.03 | 88.68 | 1.94 |                            |
| yidY/mdtL-02 | 48B | 37.35 | 79.01 | 1.86 |                            |































| Assay          | Sample | Ct    | Tm   | Efficiency | flag                         |
|----------------|--------|-------|------|------------|------------------------------|
| 16S rRNA       | 48C    |       | 12.5 | 82.22      | 2.05                         |
| aac            | 48C    | 32.75 |      | 77.51      | 1.6 MultipleMeltPeaks        |
| aac(6')-Ib(akz | 48C    |       |      |            | LowEfficiency, CtIsSmall, Ci |
| aac(6')-Ib(akz | 48C    | 33.25 |      | 86.23      | 2.01 MultipleMeltPeaks       |
| aac(6')-Ib(akz | 48C    | 34.18 |      | 83.89      | 1.92                         |
| aac(6')-II     | 48C    |       |      |            | LowEfficiency, CtIsSmall, S; |
| aac(6')I1      | 48C    |       |      |            | NoAmplification              |
| aacA/aphD      | 48C    |       |      |            | LowEfficiency, CtIsSmall, Ci |
| aacC           | 48C    | 30.45 |      | 88.63      | 1.75                         |
| aacC1          | 48C    |       |      |            | NoAmplification              |
| aacC2          | 48C    |       |      |            | LowEfficiency, CtIsSmall, Ci |
| aacC4          | 48C    | 29.71 |      | 82.83      | 1.74                         |
| aadA-01        | 48C    | 29.94 |      | 81.22      | 1.9                          |
| aadA-02        | 48C    |       |      |            | LowEfficiency, CtIsSmall, S; |
| aadA-1-01      | 48C    | 30.74 |      | 78.47      | 1.88                         |
| aadA-1-02      | 48C    |       |      |            | LowEfficiency, CtIsSmall, S; |
| aadA1          | 48C    | 35.92 |      | 83.27      | 1.9                          |
| aadA2-01       | 48C    |       |      |            | LowEfficiency, CtIsSmall, S; |
| aadA2-02       | 48C    | 33.55 |      | 75.07      | 2.02                         |
| aadA2-03       | 48C    |       |      |            | LowEfficiency, CtIsSmall, Ci |
| aadA5-01       | 48C    |       |      |            | LowEfficiency, CtIsSmall, Ci |
| aadA5-02       | 48C    |       |      |            | CurveFitFailed               |
| aadA9-01       | 48C    |       |      |            | CurveFitFailed               |
| aadA9-02       | 48C    | 34.32 |      | 90.03      | 2.09                         |
| aadD           | 48C    |       |      |            | CurveFitFailed               |
| aadE           | 48C    |       |      |            | LowEfficiency, CtIsSmall, S; |
| acrA-01        | 48C    | 33.44 |      | 88.8       | 2.07 MultipleMeltPeaks       |
| acrA-02        | 48C    |       |      |            | LowEfficiency, CtIsSmall, Ci |
| acrA-03        | 48C    |       |      |            | BadR2, LowEfficiency, CtIsS  |
| acrA-04        | 48C    | 29.35 |      | 80.67      | 1.9                          |
| acrA-05        | 48C    | 30.33 |      | 89.31      | 2                            |
| acrB-01        | 48C    | 30.52 |      | 82.22      | 1.88                         |
| acrF           | 48C    |       |      |            | BadR2, LowEfficiency, CtIsS  |
| acrR-01        | 48C    |       |      |            | CurveFitFailed               |
| acrR-02        | 48C    |       |      |            | LowEfficiency, CtIsSmall, S; |
| Actin          | 48C    | 20.24 |      | 87.05      | 1.97                         |
| adeA           | 48C    |       |      |            | LowEfficiency, CtIsSmall, Ci |
| ampC-01        | 48C    | 35.22 |      | 80.01      | 1.73 MultipleMeltPeaks       |
| ampC-02        | 48C    |       |      |            | CurveFitFailed               |
| ampC-04        | 48C    |       |      |            | CurveFitFailed               |
| ampC-05        | 48C    |       |      |            | LowEfficiency, CtIsSmall, Ci |
| ampC-06        | 48C    |       |      |            | LowEfficiency, CtIsSmall, Ci |
| ampC-07        | 48C    |       |      |            | CurveFitFailed               |
| ampC-09        | 48C    |       |      |            | LowEfficiency, CtIsSmall, Ci |
| ampC/blaDH     | 48C    | 31.57 |      | 84.68      | 1.72                         |

|                          |     |       |       |      |                                          |
|--------------------------|-----|-------|-------|------|------------------------------------------|
| aph                      | 48C |       |       |      | LowEfficiency, CtIsSmall, Ci             |
| aph(2')-Id-01            | 48C |       |       |      | LowEfficiency, CtIsSmall, Ci             |
| aph(2')-Id-02            | 48C |       |       |      | LowEfficiency, CtIsSmall, Ci             |
| aph6ia                   | 48C |       |       |      | CurveFitFailed                           |
| aphA1(aka k <sub>z</sub> | 48C |       |       |      | LowEfficiency, CtIsSmall, Ci             |
| bacA-01                  | 48C |       |       |      | LowEfficiency, CtIsSmall, Ci             |
| bacA-02                  | 48C | 34.64 | 83.49 | 1.66 |                                          |
| BETA-globin              | 48C | 20.94 | 84.28 | 2    |                                          |
| bla-ACC-1                | 48C |       |       |      | LowEfficiency, CtIsSmall, S <sub>e</sub> |
| bla-L1                   | 48C | 30.04 | 85.54 | 1.93 |                                          |
| bla1                     | 48C |       |       |      | LowEfficiency, CtIsSmall, Ci             |
| blaCMY                   | 48C | 30.86 | 80.21 | 1.78 |                                          |
| blaCMY2-01               | 48C |       |       |      | LowEfficiency, CtIsSmall, S <sub>e</sub> |
| blaCMY2-02               | 48C | 31.89 | 85.4  | 1.9  | MultipleMeltPeaks                        |
| blaCTX-M-01              | 48C |       |       |      | CurveFitFailed                           |
| blaCTX-M-02              | 48C |       |       |      | LowEfficiency, CtIsSmall, Ci             |
| blaCTX-M-03              | 48C |       |       |      | LowEfficiency, CtIsSmall, S <sub>e</sub> |
| blaCTX-M-04              | 48C |       |       |      | CurveFitFailed                           |
| blaCTX-M-05              | 48C |       |       |      | NoAmplification                          |
| blaCTX-M-06              | 48C |       |       |      | LowEfficiency, CtIsSmall, S <sub>e</sub> |
| blaGES                   | 48C |       |       |      | LowEfficiency, CtIsSmall, Ci             |
| blaIMP-01                | 48C |       |       |      | NoAmplification                          |
| blaIMP-02                | 48C |       |       |      | LowEfficiency, CtIsSmall, Ci             |
| blaMOX/blaC              | 48C |       |       |      | NoAmplification                          |
| blaOCH                   | 48C |       |       |      | NoAmplification                          |
| blaOKP                   | 48C |       |       |      | NoAmplification                          |
| blaOXA1/blaC             | 48C |       |       |      | LowEfficiency, CtIsSmall, S <sub>e</sub> |
| blaOXA10-01              | 48C |       |       |      | LowEfficiency, CtIsSmall, S <sub>e</sub> |
| blaOXA10-02              | 48C |       |       |      | LowEfficiency, CtIsSmall, Ci             |
| blaOXY                   | 48C |       |       |      | LowEfficiency, CtIsSmall, Ci             |
| blaPAO                   | 48C |       |       |      | LowEfficiency, CtIsSmall, Ci             |
| blaPER                   | 48C |       |       |      | LowEfficiency, CtIsSmall, Ci             |
| blaPSE                   | 48C |       |       |      | LowEfficiency, CtIsSmall, Ci             |
| blaROB                   | 48C |       |       |      | NoAmplification                          |
| blaSFO                   | 48C | 31.76 | 87.06 | 1.88 | MultipleMeltPeaks                        |
| blaSHV-01                | 48C |       |       |      | LowEfficiency, CtIsSmall, S <sub>e</sub> |
| blaSHV-02                | 48C |       |       |      | LowEfficiency, CtIsSmall, Ci             |
| blaTEM                   | 48C | 17.68 | 79.12 | 1.57 |                                          |
| blaTLA                   | 48C |       |       |      | LowEfficiency, CtIsSmall, Ci             |
| blaVEB                   | 48C |       |       |      | LowEfficiency, CtIsSmall, Ci             |
| blaVIM                   | 48C |       |       |      | NoAmplification                          |
| blaZ                     | 48C | 27.99 | 73.2  | 1.63 |                                          |
| carB                     | 48C |       |       |      | LowEfficiency, CtIsSmall, Ci             |
| catA1                    | 48C |       |       |      | NoAmplification                          |
| catB3                    | 48C | 34.68 | 87.6  | 1.95 |                                          |
| catB8                    | 48C | 33.87 | 79.7  | 1.93 |                                          |

|            |     |       |       |      |                                          |
|------------|-----|-------|-------|------|------------------------------------------|
| ceoA       | 48C | 30.94 | 82.26 | 1.95 |                                          |
| cepA       | 48C |       |       |      | LowEfficiency, CtIsSmall, S <sub>c</sub> |
| cfiA       | 48C | 36.3  | 79.98 | 1.97 |                                          |
| cfr        | 48C |       |       |      | LowEfficiency, CtIsSmall, C <sub>i</sub> |
| cfxA       | 48C | 17.47 | 77.6  | 1.86 |                                          |
| cmeA       | 48C |       |       |      | LowEfficiency, CtIsSmall, C <sub>i</sub> |
| cmlA1-01   | 48C | 36.22 | 87.39 | 1.99 | MultipleMeltPeaks                        |
| cmlA1-02   | 48C |       |       |      | NoAmplification                          |
| cmr        | 48C |       |       |      | LowEfficiency, CtIsSmall, S <sub>c</sub> |
| cmx(A)     | 48C | 28.61 | 87.19 | 1.89 | MultipleMeltPeaks                        |
| cphA-01    | 48C | 35.37 | 91.51 | 1.97 |                                          |
| cphA-02    | 48C |       |       |      | LowEfficiency, CtIsSmall, S <sub>c</sub> |
| dfrA1      | 48C |       |       |      | CurveFitFailed                           |
| dfrA12     | 48C |       |       |      | LowEfficiency, CtIsSmall, S <sub>c</sub> |
| emrD       | 48C |       |       |      | NoAmplification                          |
| ereA       | 48C |       |       |      | LowEfficiency, CtIsSmall, C <sub>i</sub> |
| ereB       | 48C |       |       |      | LowEfficiency, CtIsSmall, S <sub>c</sub> |
| erm(34)    | 48C |       |       |      | LowEfficiency, CtIsSmall, C <sub>i</sub> |
| erm(35)    | 48C |       |       |      | LowEfficiency, CtIsSmall, C <sub>i</sub> |
| erm(36)    | 48C | 32.66 | 85.8  | 1.88 |                                          |
| ermA       | 48C |       |       |      | CurveFitFailed                           |
| ermA/ermTR | 48C | 29.22 | 75.48 | 1.93 |                                          |
| ermB       | 48C | 17.06 | 74.75 | 2.09 |                                          |
| ermC       | 48C | 27    | 75.32 | 1.77 |                                          |
| ermF       | 48C |       |       |      | LowEfficiency, CtIsSmall, S <sub>c</sub> |
| ermJ/ermD  | 48C |       |       |      | LowEfficiency, CtIsSmall, C <sub>i</sub> |
| ermK-01    | 48C |       |       |      | CurveFitFailed                           |
| ermK-02    | 48C |       |       |      | LowEfficiency, CtIsSmall, S <sub>c</sub> |
| ermT-01    | 48C |       |       |      | LowEfficiency, CtIsSmall, C <sub>i</sub> |
| ermT-02    | 48C |       |       |      | LowEfficiency, CtIsSmall, C <sub>i</sub> |
| ermX       | 48C | 16.2  | 84.07 | 1.89 |                                          |
| ermY       | 48C |       |       |      | LowEfficiency, CtIsSmall, S <sub>c</sub> |
| fabK       | 48C | 17.36 | 77.52 | 2.3  |                                          |
| floR       | 48C |       |       |      | LowEfficiency, CtIsSmall, C <sub>i</sub> |
| folA       | 48C |       |       |      | NoAmplification                          |
| fosB       | 48C |       |       |      | LowEfficiency, CtIsSmall, S <sub>c</sub> |
| fosX       | 48C |       |       |      | LowEfficiency, CtIsSmall, C <sub>i</sub> |
| fox5       | 48C | 30.17 | 86.69 | 1.68 |                                          |
| imiR       | 48C |       |       |      | LowEfficiency, CtIsSmall, S <sub>c</sub> |
| ImrA-01    | 48C | 33.52 | 85.21 | 2.01 | MultipleMeltPeaks                        |
| intl       | 48C |       |       |      | CurveFitFailed                           |
| intl1      | 48C | 23.23 | 87.05 | 2.03 | MultipleMeltPeaks                        |
| IS613      | 48C | 21.47 | 80.03 | 1.83 |                                          |
| lnuA-01    | 48C |       |       |      | LowEfficiency, CtIsSmall, S <sub>c</sub> |
| lnuB-01    | 48C |       |       |      | LowEfficiency, CtIsSmall, C <sub>i</sub> |
| lnuB-02    | 48C |       |       |      | LowEfficiency, CtIsSmall, C <sub>i</sub> |

|                |     |       |       |      |                             |
|----------------|-----|-------|-------|------|-----------------------------|
| lnuC           | 48C |       |       |      | LowEfficiency, CtIsSmall, S |
| marR-01        | 48C | 32.99 | 85.25 | 1.96 |                             |
| matA/mel       | 48C | 14.25 | 77.53 | 2.26 |                             |
| mdet1          | 48C |       |       |      | LowEfficiency, CtIsSmall, C |
| mdtA           | 48C |       |       |      | LowEfficiency, CtIsSmall, S |
| mdtE/yhiU      | 48C | 33.54 | 85.19 | 1.97 |                             |
| mecA           | 48C |       |       |      | LowEfficiency, CtIsSmall, C |
| mefA           | 48C | 13.8  | 80.51 | 2.19 |                             |
| mepA           | 48C |       |       |      | CurveFitFailed              |
| mexA           | 48C |       |       |      | LowEfficiency, CtIsSmall, S |
| mexD           | 48C |       |       |      | CurveFitFailed              |
| mexE           | 48C | 32.09 | 92.25 | 1.92 |                             |
| mexF           | 48C | 29.94 | 86.24 | 1.7  | MultipleMeltPeaks           |
| mphA-01        | 48C | 29.88 | 89.3  | 1.91 |                             |
| mphA-02        | 48C |       |       |      | BadR2, LowEfficiency, CtIsS |
| mphB           | 48C | 33.69 | 88.78 | 2.05 |                             |
| mphC           | 48C |       |       |      | LowEfficiency, CtIsSmall, C |
| msrA-01        | 48C |       |       |      | LowEfficiency, CtIsSmall, C |
| msrC-01        | 48C |       |       |      | NoAmplification             |
| mtrC-01        | 48C |       |       |      | LowEfficiency, CtIsSmall, C |
| mtrC-02        | 48C |       |       |      | LowEfficiency, CtIsSmall, C |
| mtrD-02        | 48C | 29.57 | 81.71 | 1.96 |                             |
| mtrD-03        | 48C | 34.2  | 82.22 | 1.92 |                             |
| NDM1           | 48C |       |       |      | LowEfficiency, CtIsSmall, C |
| nimE           | 48C |       |       |      | BadR2, LowEfficiency, CtIsS |
| nisB           | 48C |       |       |      | LowEfficiency, CtIsSmall, C |
| oleC           | 48C | 34.64 | 91.91 | 1.94 |                             |
| oprD           | 48C | 29.5  | 91.84 | 1.67 |                             |
| oprJ           | 48C | 30.35 | 81.29 | 1.79 |                             |
| pbp            | 48C |       |       |      | LowEfficiency, CtIsSmall, S |
| pbp2x          | 48C | 17.57 | 75.1  | 1.81 |                             |
| Pbp5           | 48C |       |       |      | LowEfficiency, CtIsSmall, S |
| penA           | 48C |       |       |      | NoAmplification             |
| pikR1          | 48C | 31.11 | 89.22 | 1.64 |                             |
| pikR2          | 48C | 31.59 | 84.92 | 1.99 |                             |
| pmrA           | 48C | 17.4  | 79.8  | 2.02 |                             |
| pncA           | 48C | 26.95 | 89.49 | 1.63 |                             |
| putative multi | 48C |       |       |      | LowEfficiency, CtIsSmall, S |
| qac            | 48C |       |       |      | LowEfficiency, CtIsSmall, S |
| qacA           | 48C | 28.47 | 80.91 | 1.94 |                             |
| qacA/qacB      | 48C |       |       |      | LowEfficiency, CtIsSmall, C |
| qacEdelta1-0   | 48C |       |       |      | LowEfficiency, CtIsSmall, C |
| qacEdelta1-0   | 48C | 30.94 | 80.26 | 1.94 |                             |
| qacH-01        | 48C | 34.19 | 90.3  | 2    |                             |
| qacH-02        | 48C |       |       |      | CurveFitFailed              |
| qnrA           | 48C |       |       |      | LowEfficiency, CtIsSmall, C |



|              |     |       |       |      |                                          |
|--------------|-----|-------|-------|------|------------------------------------------|
| rarD-02      | 48C |       |       |      | NoAmplification                          |
| sat4         | 48C |       |       |      | CurveFitFailed                           |
| sdeB         | 48C |       |       |      | LowEfficiency, CtIsSmall, S <sub>e</sub> |
| spcN-01      | 48C |       |       |      | LowEfficiency, CtIsSmall, C <sub>i</sub> |
| speA         | 48C |       |       |      | CurveFitFailed                           |
| str          | 48C |       |       |      | LowEfficiency, CtIsSmall, C <sub>i</sub> |
| strA         | 48C |       |       |      | LowEfficiency, CtIsSmall, C <sub>i</sub> |
| strB         | 48C |       |       |      | LowEfficiency, CtIsSmall, S <sub>e</sub> |
| sul1         | 48C |       |       |      | NoAmplification                          |
| sul2         | 48C |       |       |      | CurveFitFailed                           |
| sulA/foIP-01 | 48C | 15.65 | 81.15 | 2.14 |                                          |
| sulA/foIP-03 | 48C | 15.86 | 83.19 | 2.16 |                                          |
| tet(32)      | 48C | 18.87 | 81.42 | 2    |                                          |
| tet(34)      | 48C | 30.23 | 75.71 | 1.9  |                                          |
| tet(35)      | 48C |       |       |      | NoAmplification                          |
| tet(36)-A    | 48C |       |       |      | LowEfficiency, CtIsSmall, S <sub>e</sub> |
| tet(36)-B    | 48C |       |       |      | LowEfficiency, CtIsSmall, C <sub>i</sub> |
| tet(37)      | 48C | 35.8  | 76.13 | 2    | MultipleMeltPeaks                        |
| tetA-01      | 48C | 36.4  | 85.06 | 1.89 |                                          |
| tetA-02      | 48C |       |       |      | CurveFitFailed                           |
| tetB-01      | 48C | 17.68 | 80.01 | 1.92 |                                          |
| tetB-02      | 48C | 17.27 | 79.91 | 2.11 |                                          |
| tetC-01      | 48C | 17.48 | 75.25 | 1.86 |                                          |
| tetC-02      | 48C | 17.35 | 76.15 | 2.1  |                                          |
| tetD-01      | 48C |       |       |      | LowEfficiency, CtIsSmall, C <sub>i</sub> |
| tetD-02      | 48C | 32.48 | 77.03 | 1.94 |                                          |
| tetE         | 48C | 34.65 | 78.66 | 2.06 |                                          |
| tetG-01      | 48C | 32.19 | 82.07 | 1.98 | MultipleMeltPeaks                        |
| tetG-02      | 48C | 31.49 | 87.31 | 1.89 | MultipleMeltPeaks                        |
| tetH         | 48C |       |       |      | LowEfficiency, CtIsSmall, C <sub>i</sub> |
| tetJ         | 48C |       |       |      | LowEfficiency, CtIsSmall, C <sub>i</sub> |
| tetK         | 48C | 33.41 | 72.02 | 2.13 |                                          |
| tetL-01      | 48C |       |       |      | LowEfficiency, CtIsSmall, C <sub>i</sub> |
| tetL-02      | 48C |       |       |      | CurveFitFailed                           |
| tetM-01      | 48C | 14.96 | 75.93 | 2.2  |                                          |
| tetM-02      | 48C | 14.86 | 77.65 | 2.23 |                                          |
| tetO-01      | 48C | 16.43 | 76.93 | 2.05 |                                          |
| tetPA        | 48C |       |       |      | LowEfficiency, CtIsSmall, C <sub>i</sub> |
| tetPB-01     | 48C | 37.09 | 77.54 | 1.96 |                                          |
| tetPB-02     | 48C | 30.59 | 84.88 | 1.84 |                                          |
| tetPB-03     | 48C |       |       |      | CurveFitFailed                           |
| tetPB-05     | 48C |       |       |      | LowEfficiency, CtIsSmall, C <sub>i</sub> |
| tetQ         | 48C | 19.68 | 76.24 | 2.12 |                                          |
| tetR-02      | 48C | 29.44 | 89.41 | 1.82 |                                          |
| tetR-03      | 48C | 17.42 | 76.35 | 2.02 |                                          |
| tetS         | 48C | 34.2  | 87.45 | 2.25 |                                          |

|             |     |       |       |      |                              |
|-------------|-----|-------|-------|------|------------------------------|
| tetT        | 48C |       |       |      | LowEfficiency, CtIsSmall, Ci |
| tetU-01     | 48C |       |       |      | NoAmplification              |
| tetV        | 48C |       |       |      | CurveFitFailed               |
| tetW-01     | 48C | 17.19 | 82.2  | 2.16 |                              |
| tetX        | 48C |       |       |      | BadR2, CtIsSmall, Saturatio  |
| tnpA-01     | 48C |       |       |      | LowEfficiency, CtIsSmall, Ci |
| tnpA-02     | 48C | 28.82 | 84.94 | 1.69 |                              |
| tnpA-03     | 48C |       |       |      | LowEfficiency, CtIsSmall, Ci |
| tnpA-04     | 48C |       |       |      | LowEfficiency, CtIsSmall, Ci |
| tnpA-05     | 48C | 29.72 | 80.69 | 1.85 |                              |
| tnpA-07     | 48C |       |       |      | LowEfficiency, CtIsSmall, Ci |
| tolC-01     | 48C | 29.56 | 78.62 | 1.87 |                              |
| tolC-02     | 48C | 31.72 | 87.86 | 1.93 |                              |
| tolC-03     | 48C | 33.95 | 88.45 | 2.04 | MultipleMeltPeaks            |
| Tp614       | 48C |       |       |      | LowEfficiency, CtIsSmall, Ci |
| ttgA        | 48C |       |       |      | LowEfficiency, CtIsSmall, S: |
| ttgB        | 48C |       |       |      | LowEfficiency, CtIsSmall, Ci |
| vanA        | 48C |       |       |      | LowEfficiency, CtIsSmall, Ci |
| vanB-01     | 48C | 33.71 | 87.84 | 1.59 |                              |
| vanC-01     | 48C |       |       |      | LowEfficiency, CtIsSmall, Ci |
| vanC-02     | 48C |       |       |      | LowEfficiency, CtIsSmall, Ci |
| vanC-03     | 48C | 24.42 | 85.96 | 1.94 | MultipleMeltPeaks            |
| vanC1       | 48C |       |       |      | LowEfficiency, CtIsSmall, Ci |
| vanC2/vanC3 | 48C | 34.94 | 82.72 | 2.05 |                              |
| vanG        | 48C |       |       |      | LowEfficiency, CtIsSmall, Ci |
| vanHB       | 48C | 31.49 | 83.01 | 1.83 | MultipleMeltPeaks            |
| vanHD       | 48C |       |       |      | CurveFitFailed               |
| vanRA-01    | 48C |       |       |      | LowEfficiency, CtIsSmall, Ci |
| vanRA-02    | 48C |       |       |      | LowEfficiency, CtIsSmall, Ci |
| vanRB       | 48C |       |       |      | CurveFitFailed               |
| vanRC       | 48C |       |       |      | LowEfficiency, CtIsSmall, Ci |
| vanRC4      | 48C |       |       |      | LowEfficiency, CtIsSmall, S: |
| vanRD       | 48C |       |       |      | LowEfficiency, CtIsSmall, Ci |
| vanSA       | 48C |       |       |      | LowEfficiency, CtIsSmall, S: |
| vanSB       | 48C |       |       |      | LowEfficiency, CtIsSmall, S: |
| vanSC-01    | 48C |       |       |      | CurveFitFailed               |
| vanSC-02    | 48C |       |       |      | NoAmplification              |
| vanTC-01    | 48C |       |       |      | LowEfficiency, CtIsSmall, Ci |
| vanTC-02    | 48C |       |       |      | LowEfficiency, CtIsSmall, Ci |
| vanTE       | 48C |       |       |      | LowEfficiency, CtIsSmall, Ci |
| vanTG       | 48C |       |       |      | NoAmplification              |
| vanWB       | 48C |       |       |      | LowEfficiency, CtIsSmall, S: |
| vanWG       | 48C |       |       |      | LowEfficiency, CtIsSmall, Ci |
| vanXA       | 48C |       |       |      | LowEfficiency, CtIsSmall, S: |
| vanXB       | 48C |       |       |      | NoAmplification              |
| vanXD       | 48C |       |       |      | LowEfficiency, CtIsSmall, S: |

|              |     |       |       |      |                              |
|--------------|-----|-------|-------|------|------------------------------|
| vanYB        | 48C |       |       |      | CurveFitFailed               |
| vanYD-01     | 48C | 29.66 | 88.73 | 1.78 |                              |
| vanYD-02     | 48C |       |       |      | LowEfficiency, CtIsSmall, Ci |
| vatB-01      | 48C |       |       |      | LowEfficiency, CtIsSmall, Ci |
| vatB-02      | 48C |       |       |      | LowEfficiency, CtIsSmall, Ci |
| vatC-01      | 48C | 30.97 | 81.44 | 1.85 |                              |
| vatC-02      | 48C |       |       |      | LowEfficiency, CtIsSmall, Ci |
| vatE-01      | 48C | 31.49 | 76.92 | 1.98 |                              |
| vatE-02      | 48C |       |       |      | NoAmplification              |
| vgaA-01      | 48C |       |       |      | LowEfficiency, CtIsSmall, S: |
| vgaA-02      | 48C |       |       |      | LowEfficiency, CtIsSmall, S: |
| vgb-01       | 48C |       |       |      | LowEfficiency, CtIsSmall, S: |
| vgbB-01      | 48C |       |       |      | LowEfficiency, CtIsSmall, Ci |
| vgbB-02      | 48C |       |       |      | LowEfficiency, CtIsSmall, Ci |
| yceE/mdtG-0  | 48C |       |       |      | LowEfficiency, CtIsSmall, Ci |
| yceE/mdtG-0  | 48C |       |       |      | LowEfficiency, CtIsSmall, Ci |
| yceL/mdtH-0  | 48C | 32.07 | 85.15 | 1.81 |                              |
| yceL/mdtH-0  | 48C |       |       |      | LowEfficiency, CtIsSmall, Ci |
| yceL/mdtH-0  | 48C | 28.64 | 79.74 | 1.98 |                              |
| yidY/mdtL-01 | 48C | 34.09 | 90.25 | 1.95 |                              |
| yidY/mdtL-02 | 48C |       |       |      | LowEfficiency, CtIsSmall, Ci |































| Assay          | Sample | Ct | Tm    | Efficiency | flag                         |
|----------------|--------|----|-------|------------|------------------------------|
| 16S rRNA       | 49A    |    | 11.42 | 82.35      | 1.93                         |
| aac            | 49A    |    | 33.22 | 77.82      | 1.85                         |
| aac(6')-Ib(akz | 49A    |    |       |            | CurveFitFailed               |
| aac(6')-Ib(akz | 49A    |    | 34.41 | 79.81      | 1.99 MultipleMeltPeaks       |
| aac(6')-Ib(akz | 49A    |    |       |            | CurveFitFailed               |
| aac(6')-II     | 49A    |    | 35.28 | 90.64      | 1.89                         |
| aac(6')I1      | 49A    |    |       |            | NoAmplification              |
| aacA/aphD      | 49A    |    |       |            | LowEfficiency, CtIsSmall, S: |
| aacC           | 49A    |    | 24.46 | 88.63      | 2.01                         |
| aacC1          | 49A    |    |       |            | NoAmplification              |
| aacC2          | 49A    |    | 28.05 | 79.29      | 1.97                         |
| aacC4          | 49A    |    | 32.21 | 92.1       | 1.83 MultipleMeltPeaks       |
| aadA-01        | 49A    |    | 34.77 | 82.28      | 1.94                         |
| aadA-02        | 49A    |    | 28.25 | 82.01      | 1.95                         |
| aadA-1-01      | 49A    |    | 24.29 | 80         | 1.87                         |
| aadA-1-02      | 49A    |    | 23.98 | 76.48      | 2.04                         |
| aadA1          | 49A    |    | 27.72 | 79.58      | 1.99                         |
| aadA2-01       | 49A    |    | 27.73 | 80.91      | 1.89                         |
| aadA2-02       | 49A    |    | 30.18 | 82.82      | 1.8                          |
| aadA2-03       | 49A    |    | 27.34 | 79.55      | 1.96                         |
| aadA5-01       | 49A    |    | 36.82 | 84.79      | 1.89                         |
| aadA5-02       | 49A    |    | 35.32 | 80.8       | 1.91                         |
| aadA9-01       | 49A    |    |       |            | CurveFitFailed               |
| aadA9-02       | 49A    |    | 37.07 | 86.43      | 2.01                         |
| aadD           | 49A    |    | 28.58 | 80.94      | 1.97                         |
| aadE           | 49A    |    | 23.37 | 71.92      | 2.09                         |
| acrA-01        | 49A    |    | 28.05 | 88.86      | 1.94 MultipleMeltPeaks       |
| acrA-02        | 49A    |    | 30.48 | 88.49      | 1.85                         |
| acrA-03        | 49A    |    |       |            | CurveFitFailed               |
| acrA-04        | 49A    |    |       |            | CurveFitFailed               |
| acrA-05        | 49A    |    | 24.82 | 88.82      | 1.93                         |
| acrB-01        | 49A    |    | 35.5  | 85.59      | 1.89                         |
| acrF           | 49A    |    | 34.97 | 83.26      | 1.88                         |
| acrR-01        | 49A    |    |       |            | LowEfficiency, CtIsSmall, S: |
| acrR-02        | 49A    |    |       |            | BadR2, LowEfficiency, CtIsS  |
| Actin          | 49A    |    | 21.76 | 87.07      | 1.96                         |
| adeA           | 49A    |    | 37.1  | 78.77      | 1.97                         |
| ampC-01        | 49A    |    | 30.36 | 80.27      | 1.85 MultipleMeltPeaks       |
| ampC-02        | 49A    |    |       |            | CurveFitFailed               |
| ampC-04        | 49A    |    | 36.53 | 77.47      | 1.45 MultipleMeltPeaks       |
| ampC-05        | 49A    |    |       |            | CurveFitFailed               |
| ampC-06        | 49A    |    |       |            | LowEfficiency, CtIsSmall, S: |
| ampC-07        | 49A    |    |       |            | LowEfficiency, CtIsSmall, S: |
| ampC-09        | 49A    |    |       |            | LowEfficiency, CtIsSmall, S: |
| ampC/blaDH     | 49A    |    | 32.69 | 81.61      | 1.94                         |

|                          |     |       |       |                              |
|--------------------------|-----|-------|-------|------------------------------|
| aph                      | 49A |       |       | CurveFitFailed               |
| aph(2')-Id-01            | 49A |       |       | CurveFitFailed               |
| aph(2')-Id-02            | 49A |       |       | LowEfficiency, CtIsSmall, S: |
| aph6ia                   | 49A |       |       | CurveFitFailed               |
| aphA1(aka k <sub>z</sub> | 49A | 24.27 | 76.8  | 2.11                         |
| bacA-01                  | 49A | 34.53 | 83.52 | 1.95                         |
| bacA-02                  | 49A | 29.57 | 83.48 | 1.65                         |
| BETA-globin              | 49A | 22.99 | 84.27 | 2.02                         |
| bla-ACC-1                | 49A |       |       | LowEfficiency, CtIsSmall, S: |
| bla-L1                   | 49A | 29.93 | 86.05 | 1.95                         |
| bla1                     | 49A |       |       | LowEfficiency, CtIsSmall, S: |
| blaCMY                   | 49A | 29.55 | 81.42 | 1.85                         |
| blaCMY2-01               | 49A | 33.25 | 75.01 | 2.04                         |
| blaCMY2-02               | 49A | 34.17 | 81.74 | 1.93                         |
| blaCTX-M-01              | 49A | 34.64 | 85.49 | 2.16                         |
| blaCTX-M-02              | 49A |       |       | LowEfficiency, CtIsSmall, S: |
| blaCTX-M-03              | 49A |       |       | LowEfficiency, CtIsSmall, S: |
| blaCTX-M-04              | 49A | 32    | 85.18 | 1.57                         |
| blaCTX-M-05              | 49A |       |       | NoAmplification              |
| blaCTX-M-06              | 49A |       |       | CurveFitFailed               |
| blaGES                   | 49A |       |       | LowEfficiency, CtIsSmall, C: |
| blaIMP-01                | 49A |       |       | NoAmplification              |
| blaIMP-02                | 49A |       |       | LowEfficiency, CtIsSmall, S: |
| blaMOX/blaC              | 49A |       |       | NoAmplification              |
| blaOCH                   | 49A |       |       | NoAmplification              |
| blaOKP                   | 49A |       |       | NoAmplification              |
| blaOXA1/blaC             | 49A |       |       | LowEfficiency, CtIsSmall, S: |
| blaOXA10-01              | 49A |       |       | LowEfficiency, CtIsSmall, C: |
| blaOXA10-02              | 49A |       |       | LowEfficiency, CtIsSmall, S: |
| blaOXY                   | 49A |       |       | CurveFitFailed               |
| blaPAO                   | 49A |       |       | LowEfficiency, CtIsSmall, C: |
| blaPER                   | 49A |       |       | CurveFitFailed               |
| blaPSE                   | 49A |       |       | NoAmplification              |
| blaROB                   | 49A |       |       | NoAmplification              |
| blaSFO                   | 49A | 30.56 | 88.26 | 1.95                         |
| blaSHV-01                | 49A |       |       | CurveFitFailed               |
| blaSHV-02                | 49A |       |       | CurveFitFailed               |
| blaTEM                   | 49A |       |       | NoAmplification              |
| blaTLA                   | 49A |       |       | CurveFitFailed               |
| blaVEB                   | 49A |       |       | NoAmplification              |
| blaVIM                   | 49A |       |       | NoAmplification              |
| blaZ                     | 49A |       |       | LowEfficiency, CtIsSmall, S: |
| carB                     | 49A | 37.6  | 84.47 | 1.9                          |
| catA1                    | 49A |       |       | NoAmplification              |
| catB3                    | 49A |       |       | CurveFitFailed               |
| catB8                    | 49A | 28.76 | 82.49 | 1.96                         |

|            |     |       |       |      |                                          |
|------------|-----|-------|-------|------|------------------------------------------|
| ceoA       | 49A | 31.75 | 87.15 | 1.98 | MultipleMeltPeaks                        |
| cepA       | 49A |       |       |      | CurveFitFailed                           |
| cfiA       | 49A | 32.36 | 84.65 | 1.78 |                                          |
| cfr        | 49A |       |       |      | CurveFitFailed                           |
| cfxA       | 49A | 18.46 | 77.63 | 1.88 |                                          |
| cmeA       | 49A |       |       |      | LowEfficiency, CtIsSmall, Ct             |
| cmlA1-01   | 49A | 28.64 | 84.42 | 1.95 |                                          |
| cmlA1-02   | 49A | 29.71 | 84.14 | 1.95 | MultipleMeltPeaks                        |
| cmr        | 49A |       |       |      | LowEfficiency, CtIsSmall, S <sub>c</sub> |
| cmx(A)     | 49A | 32.82 | 87.31 | 1.77 |                                          |
| cphA-01    | 49A | 34.34 | 81.28 | 1.87 |                                          |
| cphA-02    | 49A | 31.45 | 81.08 | 1.93 |                                          |
| dfrA1      | 49A | 27.66 | 78.83 | 1.99 |                                          |
| dfrA12     | 49A | 36.67 | 81.68 | 1.85 |                                          |
| emrD       | 49A | 30.68 | 83.9  | 1.88 |                                          |
| ereA       | 49A | 34.81 | 76.55 | 2    |                                          |
| ereB       | 49A |       |       |      | CurveFitFailed                           |
| erm(34)    | 49A |       |       |      | NoAmplification                          |
| erm(35)    | 49A |       |       |      | LowEfficiency, CtIsSmall, Ct             |
| erm(36)    | 49A | 31.45 | 84.95 | 1.84 |                                          |
| ermA       | 49A |       |       |      | LowEfficiency, CtIsSmall, Ct             |
| ermA/ermTR | 49A |       |       |      | NoAmplification                          |
| ermB       | 49A | 16.63 | 74.97 | 1.99 |                                          |
| ermC       | 49A |       |       |      | CurveFitFailed                           |
| ermF       | 49A |       |       |      | CurveFitFailed                           |
| ermJ/ermD  | 49A |       |       |      | LowEfficiency, CtIsSmall, S <sub>c</sub> |
| ermK-01    | 49A | 37.02 | 73.26 | 2    |                                          |
| ermK-02    | 49A | 38.38 | 75.17 | 1.94 |                                          |
| ermT-01    | 49A |       |       |      | LowEfficiency, CtIsSmall, S <sub>c</sub> |
| ermT-02    | 49A |       |       |      | LowEfficiency, CtIsSmall, S <sub>c</sub> |
| ermX       | 49A | 27.59 | 83.16 | 1.87 |                                          |
| ermY       | 49A |       |       |      | LowEfficiency, CtIsSmall, S <sub>c</sub> |
| fabK       | 49A | 21.86 | 78.78 | 2.19 |                                          |
| floR       | 49A | 26.87 | 83.29 | 1.96 |                                          |
| folA       | 49A |       |       |      | NoAmplification                          |
| fosB       | 49A |       |       |      | LowEfficiency, CtIsSmall, S <sub>c</sub> |
| fosX       | 49A |       |       |      | LowEfficiency, CtIsSmall, S <sub>c</sub> |
| fox5       | 49A | 33.53 | 86.45 | 1.89 |                                          |
| imiR       | 49A |       |       |      | CurveFitFailed                           |
| lmrA-01    | 49A | 36.46 | 82.64 | 1.94 |                                          |
| intl       | 49A | 33.93 | 84.9  | 1.89 |                                          |
| intl1      | 49A | 22.92 | 86.85 | 2.01 |                                          |
| IS613      | 49A | 23.41 | 79.49 | 1.85 |                                          |
| lnuA-01    | 49A |       |       |      | LowEfficiency, CtIsSmall, S <sub>c</sub> |
| lnuB-01    | 49A |       |       |      | LowEfficiency, CtIsSmall, S <sub>c</sub> |
| lnuB-02    | 49A |       |       |      | CurveFitFailed                           |

|                |     |       |       |      |                              |
|----------------|-----|-------|-------|------|------------------------------|
| lnuC           | 49A |       |       |      | LowEfficiency, CtIsSmall, S: |
| marR-01        | 49A | 37.31 | 87.16 | 1.79 | MultipleMeltPeaks            |
| matA/mel       | 49A | 14.62 | 77.64 | 2.12 |                              |
| mdetI1         | 49A |       |       |      | LowEfficiency, CtIsSmall, Ci |
| mdtA           | 49A | 36.06 | 75.42 | 1.92 | MultipleMeltPeaks            |
| mdtE/yhiU      | 49A | 35.04 | 78.71 | 1.79 | MultipleMeltPeaks            |
| mecA           | 49A |       |       |      | LowEfficiency, CtIsSmall, S: |
| mefA           | 49A | 14.24 | 80.48 | 2.13 |                              |
| mepA           | 49A | 31.32 | 92.48 | 1.8  |                              |
| mexA           | 49A |       |       |      | LowEfficiency, CtIsSmall, S: |
| mexD           | 49A | 36.11 | 79.66 | 2.01 |                              |
| mexE           | 49A | 33.34 | 87.57 | 1.95 |                              |
| mexF           | 49A | 30.37 | 83.04 | 1.73 |                              |
| mphA-01        | 49A | 28.17 | 83.05 | 1.87 |                              |
| mphA-02        | 49A | 30.23 | 82.39 | 1.74 |                              |
| mphB           | 49A |       |       |      | LowEfficiency, CtIsSmall, S: |
| mphC           | 49A |       |       |      | CurveFitFailed               |
| msrA-01        | 49A | 30.07 | 76.43 | 2.01 |                              |
| msrC-01        | 49A |       |       |      | NoAmplification              |
| mtrC-01        | 49A | 31.83 | 86.74 | 2    |                              |
| mtrC-02        | 49A | 40.12 | 84.36 | 1.71 |                              |
| mtrD-02        | 49A | 29.42 | 81.57 | 1.93 |                              |
| mtrD-03        | 49A | 25.21 | 80.14 | 1.79 |                              |
| NDM1           | 49A |       |       |      | LowEfficiency, CtIsSmall, S: |
| nimE           | 49A |       |       |      | CurveFitFailed               |
| nisB           | 49A |       |       |      | CurveFitFailed               |
| oleC           | 49A | 33.48 | 91.91 | 1.99 |                              |
| oprD           | 49A | 30.37 | 88.88 | 1.95 |                              |
| oprJ           | 49A | 33.89 | 91.91 | 1.83 |                              |
| pbp            | 49A |       |       |      | LowEfficiency, CtIsSmall, S: |
| pbp2x          | 49A |       |       |      | LowEfficiency, CtIsSmall, Ci |
| Pbp5           | 49A |       |       |      | CurveFitFailed               |
| penA           | 49A | 36.07 | 89.8  | 1.68 |                              |
| pikR1          | 49A | 30.24 | 89.53 | 1.91 |                              |
| pikR2          | 49A | 32.01 | 90.84 | 1.6  | MultipleMeltPeaks            |
| pmrA           | 49A | 21.17 | 79.29 | 2.07 |                              |
| pncA           | 49A | 23.26 | 89.98 | 1.83 |                              |
| putative multi | 49A |       |       |      | LowEfficiency, CtIsSmall, S: |
| qac            | 49A | 37.44 | 76.92 | 1.97 |                              |
| qacA           | 49A |       |       |      | CurveFitFailed               |
| qacA/qacB      | 49A |       |       |      | LowEfficiency, CtIsSmall, Ci |
| qacEdelta1-0   | 49A | 28.99 | 79.09 | 1.95 |                              |
| qacEdelta1-0   | 49A | 28    | 87.07 | 2    | MultipleMeltPeaks            |
| qacH-01        | 49A |       |       |      | CurveFitFailed               |
| qacH-02        | 49A |       |       |      | CurveFitFailed               |
| qnrA           | 49A | 31.43 | 80.74 | 1.92 |                              |

|              |     |       |       |      |                              |
|--------------|-----|-------|-------|------|------------------------------|
| rarD-02      | 49A |       |       |      | NoAmplification              |
| sat4         | 49A | 23.8  | 74.86 | 2.04 | MultipleMeltPeaks            |
| sdeB         | 49A |       |       |      | LowEfficiency, CtIsSmall, S: |
| spcN-01      | 49A |       |       |      | LowEfficiency, CtIsSmall, C: |
| speA         | 49A |       |       |      | NoAmplification              |
| str          | 49A |       |       |      | CurveFitFailed               |
| strA         | 49A |       |       |      | CurveFitFailed               |
| strB         | 49A | 25.88 | 83.96 | 1.94 |                              |
| sul1         | 49A |       |       |      | NoAmplification              |
| sul2         | 49A | 26.86 | 85.83 | 1.99 |                              |
| sulA/foIP-01 | 49A | 17.1  | 81.07 | 2.06 |                              |
| sulA/foIP-03 | 49A | 16.37 | 83.18 | 2.04 |                              |
| tet(32)      | 49A | 24.45 | 80.74 | 1.98 |                              |
| tet(34)      | 49A | 32.84 | 75.45 | 1.99 |                              |
| tet(35)      | 49A |       |       |      | NoAmplification              |
| tet(36)-A    | 49A | 37.99 | 84.62 | 1.78 |                              |
| tet(36)-B    | 49A |       |       |      | CurveFitFailed               |
| tet(37)      | 49A | 24.24 | 85.83 | 1.98 | MultipleMeltPeaks            |
| tetA-01      | 49A | 34.61 | 85.13 | 1.96 |                              |
| tetA-02      | 49A | 33.6  | 87.07 | 1.94 |                              |
| tetB-01      | 49A |       |       |      | CurveFitFailed               |
| tetB-02      | 49A | 28.56 | 79.62 | 2.01 |                              |
| tetC-01      | 49A |       |       |      | NoAmplification              |
| tetC-02      | 49A | 28.42 | 76.01 | 2.08 |                              |
| tetD-01      | 49A | 27.84 | 81.57 | 1.98 |                              |
| tetD-02      | 49A | 28.48 | 82.47 | 2.04 |                              |
| tetE         | 49A | 33.12 | 85.91 | 2.06 |                              |
| tetG-01      | 49A | 33.98 | 85.9  | 2.04 | MultipleMeltPeaks            |
| tetG-02      | 49A | 36.52 | 76.77 | 1.84 | MultipleMeltPeaks            |
| tetH         | 49A | 30.17 | 78.05 | 1.92 |                              |
| tetJ         | 49A |       |       |      | LowEfficiency, CtIsSmall, C: |
| tetK         | 49A | 28.3  | 72.3  | 2.1  |                              |
| tetL-01      | 49A |       |       |      | CurveFitFailed               |
| tetL-02      | 49A | 31.17 | 83.19 | 1.98 |                              |
| tetM-01      | 49A | 16.2  | 76.05 | 2.06 |                              |
| tetM-02      | 49A | 16.23 | 77.77 | 2.11 |                              |
| tetO-01      | 49A | 29.68 | 76.69 | 1.99 |                              |
| tetPA        | 49A |       |       |      | LowEfficiency, CtIsSmall, S: |
| tetPB-01     | 49A |       |       |      | CurveFitFailed               |
| tetPB-02     | 49A | 29.49 | 84.79 | 1.94 | MultipleMeltPeaks            |
| tetPB-03     | 49A |       |       |      | LowEfficiency, CtIsSmall, S: |
| tetPB-05     | 49A |       |       |      | LowEfficiency, CtIsSmall, S: |
| tetQ         | 49A | 21.08 | 76.67 | 2.06 |                              |
| tetR-02      | 49A | 30.17 | 86.01 | 1.89 |                              |
| tetR-03      | 49A | 29.53 | 76    | 1.97 |                              |
| tetS         | 49A | 34.31 | 87.83 | 2.06 |                              |

|             |     |       |       |      |                              |
|-------------|-----|-------|-------|------|------------------------------|
| tetT        | 49A |       |       |      | LowEfficiency, CtIsSmall, Ci |
| tetU-01     | 49A |       |       |      | LowEfficiency, CtIsSmall, Ci |
| tetV        | 49A | 34.15 | 89.28 | 1.87 |                              |
| tetW-01     | 49A | 29.49 | 81.44 | 2    |                              |
| tetX        | 49A | 29.75 | 76.4  | 1.99 |                              |
| tnpA-01     | 49A |       |       |      | LowEfficiency, CtIsSmall, Ci |
| tnpA-02     | 49A | 25.91 | 85.03 | 1.75 |                              |
| tnpA-03     | 49A | 33.15 | 74.87 | 2.05 |                              |
| tnpA-04     | 49A | 27.46 | 82.41 | 1.91 |                              |
| tnpA-05     | 49A | 22.88 | 80.87 | 1.94 |                              |
| tnpA-07     | 49A | 29.12 | 76.52 | 1.99 |                              |
| tolC-01     | 49A | 37.07 | 75.67 | 1.96 |                              |
| tolC-02     | 49A | 31.14 | 84.74 | 1.94 |                              |
| tolC-03     | 49A | 30.94 | 87.98 | 1.94 |                              |
| Tp614       | 49A | 37.93 | 78.11 | 1.87 |                              |
| ttgA        | 49A | 28.87 | 87.52 | 1.92 |                              |
| ttgB        | 49A |       |       |      | LowEfficiency, CtIsSmall, S; |
| vanA        | 49A |       |       |      | CurveFitFailed               |
| vanB-01     | 49A | 34.73 | 80.38 | 1.88 |                              |
| vanC-01     | 49A |       |       |      | CurveFitFailed               |
| vanC-02     | 49A |       |       |      | LowEfficiency, CtIsSmall, Ci |
| vanC-03     | 49A | 27.38 | 85.92 | 1.96 |                              |
| vanC1       | 49A |       |       |      | LowEfficiency, CtIsSmall, Ci |
| vanC2/vanC3 | 49A |       |       |      | CurveFitFailed               |
| vanG        | 49A |       |       |      | LowEfficiency, CtIsSmall, Ci |
| vanHB       | 49A | 34.27 | 85.46 | 1.94 |                              |
| vanHD       | 49A | 35.38 | 75.2  | 1.94 |                              |
| vanRA-01    | 49A |       |       |      | CurveFitFailed               |
| vanRA-02    | 49A |       |       |      | CurveFitFailed               |
| vanRB       | 49A | 30.08 | 81.93 | 1.7  |                              |
| vanRC       | 49A |       |       |      | LowEfficiency, CtIsSmall, S; |
| vanRC4      | 49A |       |       |      | LowEfficiency, CtIsSmall, S; |
| vanRD       | 49A |       |       |      | CurveFitFailed               |
| vanSA       | 49A |       |       |      | LowEfficiency, CtIsSmall, S; |
| vanSB       | 49A | 30.44 | 74.24 | 1.91 |                              |
| vanSC-01    | 49A | 33.3  | 77.85 | 1.95 |                              |
| vanSC-02    | 49A |       |       |      | NoAmplification              |
| vanTC-01    | 49A |       |       |      | CurveFitFailed               |
| vanTC-02    | 49A | 37.3  | 78.36 | 1.68 | MultipleMeltPeaks            |
| vanTE       | 49A | 30.46 | 88.74 | 1.89 |                              |
| vanTG       | 49A |       |       |      | LowEfficiency, CtIsSmall, Ci |
| vanWB       | 49A |       |       |      | LowEfficiency, CtIsSmall, S; |
| vanWG       | 49A | 34.59 | 74.35 | 1.99 |                              |
| vanXA       | 49A |       |       |      | LowEfficiency, CtIsSmall, S; |
| vanXB       | 49A |       |       |      | NoAmplification              |
| vanXD       | 49A | 31.75 | 75.78 | 1.97 |                              |

|              |     |       |       |      |                              |
|--------------|-----|-------|-------|------|------------------------------|
| vanYB        | 49A |       |       |      | CurveFitFailed               |
| vanYD-01     | 49A | 28.74 | 89.21 | 1.93 |                              |
| vanYD-02     | 49A |       |       |      | LowEfficiency, CtIsSmall, Ci |
| vatB-01      | 49A |       |       |      | LowEfficiency, CtIsSmall, Ci |
| vatB-02      | 49A |       |       |      | LowEfficiency, CtIsSmall, S: |
| vatC-01      | 49A |       |       |      | CurveFitFailed               |
| vatC-02      | 49A | 33.85 | 86.16 | 1.92 | MultipleMeltPeaks            |
| vatE-01      | 49A | 29.94 | 75.74 | 2.01 |                              |
| vatE-02      | 49A | 38.5  | 77.86 | 1.82 |                              |
| vgaA-01      | 49A |       |       |      | CurveFitFailed               |
| vgaA-02      | 49A |       |       |      | CurveFitFailed               |
| vgb-01       | 49A |       |       |      | CurveFitFailed               |
| vgbB-01      | 49A |       |       |      | CurveFitFailed               |
| vgbB-02      | 49A |       |       |      | CurveFitFailed               |
| yceE/mdtG-0  | 49A |       |       |      | CurveFitFailed               |
| yceE/mdtG-0  | 49A |       |       |      | CurveFitFailed               |
| yceL/mdtH-0  | 49A | 28.5  | 84.71 | 1.86 | MultipleMeltPeaks            |
| yceL/mdtH-0  | 49A |       |       |      | LowEfficiency, CtIsSmall, Ci |
| yceL/mdtH-0  | 49A |       |       |      | CurveFitFailed               |
| yidY/mdtL-01 | 49A | 35.05 | 90.33 | 1.89 |                              |
| yidY/mdtL-02 | 49A |       |       |      | CurveFitFailed               |































| Assay          | Sample | Ct | Tm    | Efficiency | flag                   |
|----------------|--------|----|-------|------------|------------------------|
| 16S rRNA       | 49B    |    | 17.81 | 82.13      | 1.99                   |
| aac            | 49B    |    | 34.18 | 78.27      | 1.86 MultipleMeltPeaks |
| aac(6')-Ib(akz | 49B    |    |       |            | NoAmplification        |
| aac(6')-Ib(akz | 49B    |    | 33.87 | 86.1       | 1.92                   |
| aac(6')-Ib(akz | 49B    |    | 39.25 | 83.03      | 1.71 MultipleMeltPeaks |
| aac(6')-II     | 49B    |    | 38.26 | 90.3       | 1.75 MultipleMeltPeaks |
| aac(6')I1      | 49B    |    | 37.16 | 91.02      | 1.71                   |
| aacA/aphD      | 49B    |    |       |            | NoAmplification        |
| aacC           | 49B    |    | 28.3  | 88.45      | 1.91                   |
| aacC1          | 49B    |    |       |            | NoAmplification        |
| aacC2          | 49B    |    |       |            | NoAmplification        |
| aacC4          | 49B    |    | 35.11 | 92.29      | 1.82                   |
| aadA-01        | 49B    |    |       |            | NoAmplification        |
| aadA-02        | 49B    |    |       |            | NoAmplification        |
| aadA-1-01      | 49B    |    | 28.19 | 79.78      | 1.93                   |
| aadA-1-02      | 49B    |    | 26.79 | 76.36      | 2.02                   |
| aadA1          | 49B    |    | 40.94 | 81.29      | 1.81                   |
| aadA2-01       | 49B    |    |       |            | NoAmplification        |
| aadA2-02       | 49B    |    | 35.87 | 74.74      | 2                      |
| aadA2-03       | 49B    |    |       |            | NoAmplification        |
| aadA5-01       | 49B    |    |       |            | CurveFitFailed         |
| aadA5-02       | 49B    |    |       |            | CurveFitFailed         |
| aadA9-01       | 49B    |    | 34.27 | 86.47      | 1.9                    |
| aadA9-02       | 49B    |    |       |            | NoAmplification        |
| aadD           | 49B    |    |       |            | NoAmplification        |
| aadE           | 49B    |    | 27.47 | 71.94      | 2.08                   |
| acrA-01        | 49B    |    | 32.73 | 88.73      | 1.94                   |
| acrA-02        | 49B    |    |       |            | CurveFitFailed         |
| acrA-03        | 49B    |    | 37.71 | 64.05      | 1.96 MultipleMeltPeaks |
| acrA-04        | 49B    |    | 33.59 | 80.01      | 1.97 MultipleMeltPeaks |
| acrA-05        | 49B    |    | 30.58 | 88.6       | 1.88                   |
| acrB-01        | 49B    |    | 36.53 | 75.99      | 1.96                   |
| acrF           | 49B    |    | 29.68 | 82.79      | 1.64                   |
| acrR-01        | 49B    |    |       |            | NoAmplification        |
| acrR-02        | 49B    |    | 36.41 | 83.08      | 1.83 MultipleMeltPeaks |
| Actin          | 49B    |    | 23.05 | 86.87      | 1.95                   |
| adeA           | 49B    |    | 37.78 | 83.69      | 1.81 MultipleMeltPeaks |
| ampC-01        | 49B    |    | 37.01 | 85.06      | 1.8                    |
| ampC-02        | 49B    |    |       |            | NoAmplification        |
| ampC-04        | 49B    |    | 34.98 | 77.57      | 2.04                   |
| ampC-05        | 49B    |    |       |            | NoAmplification        |
| ampC-06        | 49B    |    | 35.23 | 87.83      | 1.86                   |
| ampC-07        | 49B    |    | 35.2  | 88.2       | 1.83                   |
| ampC-09        | 49B    |    |       |            | NoAmplification        |
| ampC/blaDH     | 49B    |    | 29.23 | 76.9       | 1.98 MultipleMeltPeaks |

|                          |     |       |       |      |                   |
|--------------------------|-----|-------|-------|------|-------------------|
| aph                      | 49B |       |       |      | NoAmplification   |
| aph(2')-Id-01            | 49B |       |       |      | NoAmplification   |
| aph(2')-Id-02            | 49B |       |       |      | NoAmplification   |
| aph6ia                   | 49B |       |       |      | NoAmplification   |
| aphA1(aka k <sub>z</sub> | 49B |       |       |      | NoAmplification   |
| bacA-01                  | 49B |       |       |      | CurveFitFailed    |
| bacA-02                  | 49B | 32.15 | 83.42 | 1.73 |                   |
| BETA-globin              | 49B | 25.04 | 84.05 | 1.99 |                   |
| bla-ACC-1                | 49B |       |       |      | NoAmplification   |
| bla-L1                   | 49B | 31.22 | 82.32 | 1.91 | MultipleMeltPeaks |
| bla1                     | 49B |       |       |      | NoAmplification   |
| blaCMY                   | 49B |       |       |      | CurveFitFailed    |
| blaCMY2-01               | 49B |       |       |      | NoAmplification   |
| blaCMY2-02               | 49B | 31.45 | 83.07 | 1.89 |                   |
| blaCTX-M-01              | 49B |       |       |      | NoAmplification   |
| blaCTX-M-02              | 49B |       |       |      | NoAmplification   |
| blaCTX-M-03              | 49B |       |       |      | NoAmplification   |
| blaCTX-M-04              | 49B | 33.02 | 85.11 | 1.8  |                   |
| blaCTX-M-05              | 49B |       |       |      | NoAmplification   |
| blaCTX-M-06              | 49B |       |       |      | NoAmplification   |
| blaGES                   | 49B |       |       |      | NoAmplification   |
| blaIMP-01                | 49B |       |       |      | NoAmplification   |
| blaIMP-02                | 49B |       |       |      | NoAmplification   |
| blaMOX/blaC              | 49B |       |       |      | CurveFitFailed    |
| blaOCH                   | 49B |       |       |      | NoAmplification   |
| blaOKP                   | 49B |       |       |      | NoAmplification   |
| blaOXA1/blaC             | 49B |       |       |      | NoAmplification   |
| blaOXA10-01              | 49B |       |       |      | NoAmplification   |
| blaOXA10-02              | 49B |       |       |      | NoAmplification   |
| blaOXY                   | 49B | 40.33 | 63.94 | 1.61 | MultipleMeltPeaks |
| blaPAO                   | 49B | 29.52 | 82.87 | 1.91 |                   |
| blaPER                   | 49B |       |       |      | CurveFitFailed    |
| blaPSE                   | 49B |       |       |      | NoAmplification   |
| blaROB                   | 49B |       |       |      | NoAmplification   |
| blaSFO                   | 49B |       |       |      | CurveFitFailed    |
| blaSHV-01                | 49B | 36.88 | 64.06 | 1.59 | MultipleMeltPeaks |
| blaSHV-02                | 49B |       |       |      | NoAmplification   |
| blaTEM                   | 49B |       |       |      | NoAmplification   |
| blaTLA                   | 49B |       |       |      | NoAmplification   |
| blaVEB                   | 49B |       |       |      | NoAmplification   |
| blaVIM                   | 49B |       |       |      | NoAmplification   |
| blaZ                     | 49B |       |       |      | NoAmplification   |
| carB                     | 49B | 41.02 | 62.34 | 1.65 | MultipleMeltPeaks |
| catA1                    | 49B |       |       |      | NoAmplification   |
| catB3                    | 49B |       |       |      | NoAmplification   |
| catB8                    | 49B | 33.06 | 81.41 | 1.96 | MultipleMeltPeaks |

|            |     |       |       |      |                              |
|------------|-----|-------|-------|------|------------------------------|
| ceoA       | 49B | 31    | 82.26 | 1.93 |                              |
| cepA       | 49B |       |       |      | NoAmplification              |
| cfiA       | 49B |       |       |      | NoAmplification              |
| cfr        | 49B |       |       |      | NoAmplification              |
| cfxA       | 49B | 24.49 | 77.52 | 1.99 |                              |
| cmeA       | 49B |       |       |      | LowEfficiency, CtIsSmall, Ci |
| cmlA1-01   | 49B |       |       |      | NoAmplification              |
| cmlA1-02   | 49B | 37.42 | 87.13 | 1.81 |                              |
| cmr        | 49B |       |       |      | NoAmplification              |
| cmx(A)     | 49B | 29.74 | 85.71 | 1.95 |                              |
| cphA-01    | 49B |       |       |      | NoAmplification              |
| cphA-02    | 49B | 36.34 | 76.29 | 1.89 |                              |
| dfrA1      | 49B |       |       |      | NoAmplification              |
| dfrA12     | 49B |       |       |      | NoAmplification              |
| emrD       | 49B | 33.62 | 90.64 | 1.8  |                              |
| ereA       | 49B |       |       |      | NoAmplification              |
| ereB       | 49B | 35.37 | 88.28 | 1.82 |                              |
| erm(34)    | 49B |       |       |      | NoAmplification              |
| erm(35)    | 49B |       |       |      | NoAmplification              |
| erm(36)    | 49B | 29.62 | 81.57 | 2.02 |                              |
| ermA       | 49B |       |       |      | NoAmplification              |
| ermA/ermTR | 49B |       |       |      | NoAmplification              |
| ermB       | 49B | 22.4  | 75.02 | 2.09 |                              |
| ermC       | 49B |       |       |      | NoAmplification              |
| ermF       | 49B |       |       |      | CurveFitFailed               |
| ermJ/ermD  | 49B |       |       |      | NoAmplification              |
| ermK-01    | 49B |       |       |      | NoAmplification              |
| ermK-02    | 49B |       |       |      | NoAmplification              |
| ermT-01    | 49B |       |       |      | NoAmplification              |
| ermT-02    | 49B |       |       |      | NoAmplification              |
| ermX       | 49B | 41.45 | 66.26 | 1.61 | MultipleMeltPeaks            |
| ermY       | 49B |       |       |      | NoAmplification              |
| fabK       | 49B | 27.98 | 79.18 | 2.09 |                              |
| floR       | 49B |       |       |      | NoAmplification              |
| folA       | 49B |       |       |      | NoAmplification              |
| fosB       | 49B |       |       |      | LowEfficiency, CtIsSmall, S: |
| fosX       | 49B |       |       |      | NoAmplification              |
| fox5       | 49B | 31.66 | 86.36 | 1.97 |                              |
| imiR       | 49B |       |       |      | NoAmplification              |
| lmrA-01    | 49B |       |       |      | NoAmplification              |
| intl       | 49B | 32.11 | 84.77 | 1.94 |                              |
| intl1      | 49B | 22.36 | 87.17 | 2.01 |                              |
| IS613      | 49B | 28.78 | 79.3  | 2.01 |                              |
| lnuA-01    | 49B |       |       |      | NoAmplification              |
| lnuB-01    | 49B |       |       |      | NoAmplification              |
| lnuB-02    | 49B |       |       |      | NoAmplification              |

|                |     |       |       |                                 |
|----------------|-----|-------|-------|---------------------------------|
| lnuC           | 49B |       |       | CurveFitFailed                  |
| marR-01        | 49B | 34.92 | 87.38 | 1.76 MultipleMeltPeaks          |
| matA/mel       | 49B | 21.81 | 77.58 | 2.05                            |
| mdetI1         | 49B |       |       | NoAmplification                 |
| mdtA           | 49B | 36.2  | 65.47 | 2.57 BadR2, SaturationBaselineI |
| mdtE/yhiU      | 49B | 37.42 | 84.87 | 1.73 MultipleMeltPeaks          |
| mecA           | 49B |       |       | NoAmplification                 |
| mefA           | 49B | 20.92 | 80.45 | 1.96                            |
| mepA           | 49B |       |       | CurveFitFailed                  |
| mexA           | 49B | 40.42 | 75.41 | 1.79                            |
| mexD           | 49B | 38.32 | 79.61 | 1.86                            |
| mexE           | 49B | 38.03 | 89.96 | 1.79                            |
| mexF           | 49B | 31.26 | 81.1  | 1.87                            |
| mphA-01        | 49B | 35.22 | 87.05 | 1.8 MultipleMeltPeaks           |
| mphA-02        | 49B | 34.15 | 82.05 | 1.64 MultipleMeltPeaks          |
| mphB           | 49B | 36.79 | 82.35 | 1.82 MultipleMeltPeaks          |
| mphC           | 49B |       |       | NoAmplification                 |
| msrA-01        | 49B |       |       | NoAmplification                 |
| msrC-01        | 49B |       |       | NoAmplification                 |
| mtrC-01        | 49B | 36.01 | 82.71 | 1.85                            |
| mtrC-02        | 49B | 37.51 | 87.15 | 1.83                            |
| mtrD-02        | 49B | 30.75 | 81.18 | 1.95                            |
| mtrD-03        | 49B | 29.82 | 79.82 | 1.82                            |
| NDM1           | 49B |       |       | NoAmplification                 |
| nimE           | 49B |       |       | NoAmplification                 |
| nisB           | 49B |       |       | NoAmplification                 |
| oleC           | 49B | 36.28 | 91.7  | 1.78                            |
| oprD           | 49B | 29.76 | 81.94 | 1.97                            |
| oprJ           | 49B | 35.96 | 91.49 | 1.87 MultipleMeltPeaks          |
| pbp            | 49B |       |       | NoAmplification                 |
| pbp2x          | 49B |       |       | NoAmplification                 |
| Pbp5           | 49B |       |       | NoAmplification                 |
| penA           | 49B | 42.14 | 65.26 | 1.57 MultipleMeltPeaks          |
| pikR1          | 49B | 32.81 | 75.15 | 2.03 MultipleMeltPeaks          |
| pikR2          | 49B | 33.82 | 78.91 | 1.81 MultipleMeltPeaks          |
| pmrA           | 49B | 26.48 | 79.18 | 2.05                            |
| pncA           | 49B | 29.91 | 89.86 | 1.89                            |
| putative multi | 49B | 37.7  | 62.99 | 1.77 MultipleMeltPeaks          |
| qac            | 49B | 38.47 | 72.68 | 1.76                            |
| qacA           | 49B | 35.91 | 70.28 | 1.8                             |
| qacA/qacB      | 49B |       |       | NoAmplification                 |
| qacEdelta1-0   | 49B |       |       | NoAmplification                 |
| qacEdelta1-0   | 49B | 26.74 | 77.04 | 1.98                            |
| qacH-01        | 49B | 37.99 | 71.7  | 1.85 MultipleMeltPeaks          |
| qacH-02        | 49B | 36.72 | 83.67 | 1.76 MultipleMeltPeaks          |
| qnrA           | 49B |       |       | NoAmplification                 |



|              |     |       |       |      |                              |
|--------------|-----|-------|-------|------|------------------------------|
| rarD-02      | 49B | 33.34 | 83.68 | 1.99 | MultipleMeltPeaks            |
| sat4         | 49B |       |       |      | CurveFitFailed               |
| sdeB         | 49B |       |       |      | CurveFitFailed               |
| spcN-01      | 49B |       |       |      | NoAmplification              |
| speA         | 49B |       |       |      | NoAmplification              |
| str          | 49B |       |       |      | NoAmplification              |
| strA         | 49B |       |       |      | NoAmplification              |
| strB         | 49B |       |       |      | NoAmplification              |
| sul1         | 49B | 36.91 | 89.84 | 1.69 | MultipleMeltPeaks            |
| sul2         | 49B | 32.55 | 75.19 | 1.75 |                              |
| sulA/foIP-01 | 49B | 23.14 | 81.07 | 1.98 |                              |
| sulA/foIP-03 | 49B | 22.21 | 83.17 | 1.98 |                              |
| tet(32)      | 49B |       |       |      | NoAmplification              |
| tet(34)      | 49B | 29.98 | 75.96 | 2.02 |                              |
| tet(35)      | 49B |       |       |      | NoAmplification              |
| tet(36)-A    | 49B |       |       |      | CurveFitFailed               |
| tet(36)-B    | 49B | 36.95 | 78.21 | 1.83 |                              |
| tet(37)      | 49B | 33.89 | 85.68 | 1.91 | MultipleMeltPeaks            |
| tetA-01      | 49B | 32.31 | 85.02 | 1.94 |                              |
| tetA-02      | 49B |       |       |      | CurveFitFailed               |
| tetB-01      | 49B | 35.83 | 88.15 | 1.83 |                              |
| tetB-02      | 49B |       |       |      | CurveFitFailed               |
| tetC-01      | 49B |       |       |      | NoAmplification              |
| tetC-02      | 49B | 41.38 | 78.49 | 1.9  | MultipleMeltPeaks            |
| tetD-01      | 49B |       |       |      | NoAmplification              |
| tetD-02      | 49B | 27.57 | 78.34 | 2.02 |                              |
| tetE         | 49B |       |       |      | NoAmplification              |
| tetG-01      | 49B | 41.38 | 63.61 | 1.61 | MultipleMeltPeaks            |
| tetG-02      | 49B | 33.74 | 87.25 | 1.99 |                              |
| tetH         | 49B |       |       |      | NoAmplification              |
| tetJ         | 49B |       |       |      | NoAmplification              |
| tetK         | 49B |       |       |      | LowEfficiency, CtIsSmall, Ci |
| tetL-01      | 49B |       |       |      | NoAmplification              |
| tetL-02      | 49B | 37.62 | 84.64 | 1.62 | MultipleMeltPeaks            |
| tetM-01      | 49B | 22.74 | 76.11 | 1.99 |                              |
| tetM-02      | 49B | 22.68 | 77.83 | 2.04 |                              |
| tetO-01      | 49B |       |       |      | NoAmplification              |
| tetPA        | 49B |       |       |      | NoAmplification              |
| tetPB-01     | 49B | 36.6  | 82.11 | 1.88 |                              |
| tetPB-02     | 49B | 30.01 | 84.79 | 2.02 |                              |
| tetPB-03     | 49B | 39.93 | 75.19 | 1.79 | MultipleMeltPeaks            |
| tetPB-05     | 49B |       |       |      | NoAmplification              |
| tetQ         | 49B | 26.37 | 75.86 | 2.02 |                              |
| tetR-02      | 49B | 38.21 | 89.17 | 1.74 | MultipleMeltPeaks            |
| tetR-03      | 49B |       |       |      | NoAmplification              |
| tetS         | 49B |       |       |      | NoAmplification              |

|             |     |       |       |      |                              |
|-------------|-----|-------|-------|------|------------------------------|
| tetT        | 49B |       |       |      | NoAmplification              |
| tetU-01     | 49B |       |       |      | NoAmplification              |
| tetV        | 49B |       |       |      | CurveFitFailed               |
| tetW-01     | 49B |       |       |      | LowEfficiency, CtIsSmall, S: |
| tetX        | 49B |       |       |      | BadR2, CtIsSmall, Saturatio  |
| tnpA-01     | 49B |       |       |      | NoAmplification              |
| tnpA-02     | 49B |       |       |      | NoAmplification              |
| tnpA-03     | 49B | 30.99 | 75.37 | 2.1  |                              |
| tnpA-04     | 49B |       |       |      | NoAmplification              |
| tnpA-05     | 49B |       |       |      | NoAmplification              |
| tnpA-07     | 49B |       |       |      | NoAmplification              |
| tolC-01     | 49B |       |       |      | CurveFitFailed               |
| tolC-02     | 49B | 30.35 | 87.7  | 1.9  |                              |
| tolC-03     | 49B | 31.77 | 84.33 | 1.92 | MultipleMeltPeaks            |
| Tp614       | 49B |       |       |      | CurveFitFailed               |
| ttgA        | 49B |       |       |      | CurveFitFailed               |
| ttgB        | 49B | 38.22 | 79.22 | 1.82 | MultipleMeltPeaks            |
| vanA        | 49B |       |       |      | NoAmplification              |
| vanB-01     | 49B |       |       |      | NoAmplification              |
| vanC-01     | 49B |       |       |      | NoAmplification              |
| vanC-02     | 49B |       |       |      | NoAmplification              |
| vanC-03     | 49B | 28.88 | 86.79 | 1.95 |                              |
| vanC1       | 49B |       |       |      | NoAmplification              |
| vanC2/vanC3 | 49B | 39.57 | 80.51 | 1.78 | MultipleMeltPeaks            |
| vanG        | 49B |       |       |      | NoAmplification              |
| vanHB       | 49B |       |       |      | NoAmplification              |
| vanHD       | 49B | 38.43 | 84.66 | 1.84 |                              |
| vanRA-01    | 49B |       |       |      | NoAmplification              |
| vanRA-02    | 49B |       |       |      | NoAmplification              |
| vanRB       | 49B | 39.24 | 87.49 | 1.69 | MultipleMeltPeaks            |
| vanRC       | 49B |       |       |      | NoAmplification              |
| vanRC4      | 49B |       |       |      | NoAmplification              |
| vanRD       | 49B |       |       |      | NoAmplification              |
| vanSA       | 49B |       |       |      | NoAmplification              |
| vanSB       | 49B | 28.2  | 74.65 | 2.07 |                              |
| vanSC-01    | 49B |       |       |      | NoAmplification              |
| vanSC-02    | 49B | 33.84 | 75.59 | 1.93 |                              |
| vanTC-01    | 49B |       |       |      | NoAmplification              |
| vanTC-02    | 49B | 41.43 | 63.38 | 1.68 | MultipleMeltPeaks            |
| vanTE       | 49B | 38.07 | 88.64 | 1.79 |                              |
| vanTG       | 49B |       |       |      | NoAmplification              |
| vanWB       | 49B |       |       |      | NoAmplification              |
| vanWG       | 49B |       |       |      | NoAmplification              |
| vanXA       | 49B |       |       |      | CurveFitFailed               |
| vanXB       | 49B |       |       |      | NoAmplification              |
| vanXD       | 49B | 31.45 | 75.04 | 2.06 |                              |

|              |     |       |       |      |                   |
|--------------|-----|-------|-------|------|-------------------|
| vanYB        | 49B | 44.07 | 67.02 | 1.64 | MultipleMeltPeaks |
| vanYD-01     | 49B | 35.89 | 80.42 | 1.81 |                   |
| vanYD-02     | 49B | 35.7  | 75.22 | 1.95 |                   |
| vatB-01      | 49B |       |       |      | NoAmplification   |
| vatB-02      | 49B |       |       |      | CurveFitFailed    |
| vatC-01      | 49B | 36.06 | 72.69 | 1.88 |                   |
| vatC-02      | 49B |       |       |      | CurveFitFailed    |
| vatE-01      | 49B | 30.56 | 75.88 | 2.1  |                   |
| vatE-02      | 49B |       |       |      | NoAmplification   |
| vgaA-01      | 49B | 36.41 | 75.87 | 1.9  |                   |
| vgaA-02      | 49B |       |       |      | NoAmplification   |
| vgb-01       | 49B | 34.29 | 75.87 | 1.98 |                   |
| vgbB-01      | 49B |       |       |      | NoAmplification   |
| vgbB-02      | 49B |       |       |      | NoAmplification   |
| yceE/mdtG-0  | 49B |       |       |      | NoAmplification   |
| yceE/mdtG-0  | 49B |       |       |      | NoAmplification   |
| yceL/mdtH-0  | 49B | 29.9  | 76    | 1.97 | MultipleMeltPeaks |
| yceL/mdtH-0  | 49B |       |       |      | NoAmplification   |
| yceL/mdtH-0  | 49B | 37.41 | 77.7  | 1.83 |                   |
| yidY/mdtL-01 | 49B | 33.72 | 84.36 | 1.95 | MultipleMeltPeaks |
| yidY/mdtL-02 | 49B |       |       |      | NoAmplification   |































| Assay          | Sample | Ct | Tm    | Efficiency | flag                         |
|----------------|--------|----|-------|------------|------------------------------|
| 16S rRNA       | 49C    |    | 14.41 | 82.24      | 2                            |
| aac            | 49C    |    | 31.14 | 82.08      | 1.77 MultipleMeltPeaks       |
| aac(6')-Ib(akz | 49C    |    |       |            | LowEfficiency, CtIsSmall, Ci |
| aac(6')-Ib(akz | 49C    |    | 31.81 | 82.23      | 1.99 MultipleMeltPeaks       |
| aac(6')-Ib(akz | 49C    |    | 33.77 | 78.75      | 1.98 MultipleMeltPeaks       |
| aac(6')-II     | 49C    |    | 36.34 | 90.65      | 1.8 MultipleMeltPeaks        |
| aac(6')I1      | 49C    |    |       |            | LowEfficiency, CtIsSmall, Ci |
| aacA/aphD      | 49C    |    |       |            | LowEfficiency, CtIsSmall, Ci |
| aacC           | 49C    |    | 25.64 | 88.44      | 1.98 MultipleMeltPeaks       |
| aacC1          | 49C    |    |       |            | NoAmplification              |
| aacC2          | 49C    |    |       |            | NoAmplification              |
| aacC4          | 49C    |    | 32.86 | 89.82      | 1.99                         |
| aadA-01        | 49C    |    |       |            | CurveFitFailed               |
| aadA-02        | 49C    |    |       |            | BadR2, LowEfficiency, CtIsS  |
| aadA-1-01      | 49C    |    | 29.55 | 79.64      | 1.88                         |
| aadA-1-02      | 49C    |    | 29.37 | 76.36      | 2                            |
| aadA1          | 49C    |    | 35.22 | 84.69      | 1.96                         |
| aadA2-01       | 49C    |    |       |            | CurveFitFailed               |
| aadA2-02       | 49C    |    | 34.46 | 75.05      | 2.08                         |
| aadA2-03       | 49C    |    | 36.52 | 80.31      | 1.97                         |
| aadA5-01       | 49C    |    |       |            | BadR2, LowEfficiency, CtIsS  |
| aadA5-02       | 49C    |    | 35.74 | 77.61      | 1.91 MultipleMeltPeaks       |
| aadA9-01       | 49C    |    | 33.17 | 82.84      | 1.92                         |
| aadA9-02       | 49C    |    |       |            | LowEfficiency, CtIsSmall, Ci |
| aadD           | 49C    |    |       |            | LowEfficiency, CtIsSmall, Ci |
| aadE           | 49C    |    |       |            | LowEfficiency, CtIsSmall, Ci |
| acrA-01        | 49C    |    | 26.36 | 82.7       | 1.93 MultipleMeltPeaks       |
| acrA-02        | 49C    |    | 25.32 | 82.61      | 1.86                         |
| acrA-03        | 49C    |    |       |            | CurveFitFailed               |
| acrA-04        | 49C    |    | 32.9  | 80.15      | 1.85 MultipleMeltPeaks       |
| acrA-05        | 49C    |    | 25.04 | 88.7       | 1.91                         |
| acrB-01        | 49C    |    | 26.01 | 81.98      | 1.97                         |
| acrF           | 49C    |    | 24.98 | 82.85      | 1.8                          |
| acrR-01        | 49C    |    |       |            | CurveFitFailed               |
| acrR-02        | 49C    |    | 25.08 | 80.71      | 1.99                         |
| Actin          | 49C    |    | 20.8  | 87         | 1.92                         |
| adeA           | 49C    |    |       |            | CurveFitFailed               |
| ampC-01        | 49C    |    | 31.21 | 85.36      | 1.75                         |
| ampC-02        | 49C    |    | 24.87 | 81.97      | 1.94                         |
| ampC-04        | 49C    |    | 37.94 | 76.92      | 1.48 MultipleMeltPeaks       |
| ampC-05        | 49C    |    |       |            | NoAmplification              |
| ampC-06        | 49C    |    |       |            | LowEfficiency, CtIsSmall, Ci |
| ampC-07        | 49C    |    | 36.06 | 88.18      | 1.89 MultipleMeltPeaks       |
| ampC-09        | 49C    |    |       |            | CurveFitFailed               |
| ampC/blaDH     | 49C    |    | 29.62 | 85.7       | 1.94                         |

|                          |     |       |       |      |                                          |
|--------------------------|-----|-------|-------|------|------------------------------------------|
| aph                      | 49C |       |       |      | LowEfficiency, CtIsSmall, Ci             |
| aph(2')-Id-01            | 49C |       |       |      | CurveFitFailed                           |
| aph(2')-Id-02            | 49C |       |       |      | LowEfficiency, CtIsSmall, Ci             |
| aph6ia                   | 49C |       |       |      | LowEfficiency, CtIsSmall, Ci             |
| aphA1(aka k <sub>z</sub> | 49C |       |       |      | CurveFitFailed                           |
| bacA-01                  | 49C |       |       |      | LowEfficiency, CtIsSmall, Ci             |
| bacA-02                  | 49C | 24.93 | 83.01 | 2.01 |                                          |
| BETA-globin              | 49C | 21.91 | 84.11 | 2.02 |                                          |
| bla-ACC-1                | 49C |       |       |      | CurveFitFailed                           |
| bla-L1                   | 49C | 32.9  | 85.25 | 1.98 | MultipleMeltPeaks                        |
| bla1                     | 49C |       |       |      | LowEfficiency, CtIsSmall, Ci             |
| blaCMY                   | 49C | 35.68 | 80.23 | 1.94 |                                          |
| blaCMY2-01               | 49C | 37.98 | 81.09 | 1.81 |                                          |
| blaCMY2-02               | 49C | 31.04 | 82.4  | 1.79 |                                          |
| blaCTX-M-01              | 49C |       |       |      | CurveFitFailed                           |
| blaCTX-M-02              | 49C | 36.31 | 83.26 | 1.71 | MultipleMeltPeaks                        |
| blaCTX-M-03              | 49C | 37.56 | 87.68 | 1.88 | MultipleMeltPeaks                        |
| blaCTX-M-04              | 49C | 31.68 | 87.98 | 1.63 |                                          |
| blaCTX-M-05              | 49C |       |       |      | NoAmplification                          |
| blaCTX-M-06              | 49C |       |       |      | NoAmplification                          |
| blaGES                   | 49C |       |       |      | LowEfficiency, CtIsSmall, Ci             |
| blaIMP-01                | 49C |       |       |      | LowEfficiency, CtIsSmall, Ci             |
| blaIMP-02                | 49C |       |       |      | LowEfficiency, CtIsSmall, S <sub>c</sub> |
| blaMOX/blaC              | 49C |       |       |      | NoAmplification                          |
| blaOCH                   | 49C |       |       |      | NoAmplification                          |
| blaOKP                   | 49C |       |       |      | NoAmplification                          |
| blaOXA1/blaC             | 49C |       |       |      | LowEfficiency, CtIsSmall, S <sub>c</sub> |
| blaOXA10-01              | 49C |       |       |      | LowEfficiency, CtIsSmall, Ci             |
| blaOXA10-02              | 49C |       |       |      | CurveFitFailed                           |
| blaOXY                   | 49C | 36.53 | 89.01 | 1.75 |                                          |
| blaPAO                   | 49C |       |       |      | NoAmplification                          |
| blaPER                   | 49C |       |       |      | LowEfficiency, CtIsSmall, Ci             |
| blaPSE                   | 49C |       |       |      | LowEfficiency, CtIsSmall, Ci             |
| blaROB                   | 49C | 35.82 | 89.43 | 1.89 | MultipleMeltPeaks                        |
| blaSFO                   | 49C | 34.57 | 86.5  | 1.94 |                                          |
| blaSHV-01                | 49C |       |       |      | LowEfficiency, CtIsSmall, Ci             |
| blaSHV-02                | 49C | 36.18 | 77.11 | 1.97 |                                          |
| blaTEM                   | 49C |       |       |      | NoAmplification                          |
| blaTLA                   | 49C |       |       |      | LowEfficiency, CtIsSmall, S <sub>c</sub> |
| blaVEB                   | 49C |       |       |      | LowEfficiency, CtIsSmall, Ci             |
| blaVIM                   | 49C |       |       |      | NoAmplification                          |
| blaZ                     | 49C |       |       |      | LowEfficiency, CtIsSmall, Ci             |
| carB                     | 49C |       |       |      | BadR2, LowEfficiency, CtIsS              |
| catA1                    | 49C |       |       |      | NoAmplification                          |
| catB3                    | 49C |       |       |      | NoAmplification                          |
| catB8                    | 49C | 33.47 | 81.72 | 1.96 | MultipleMeltPeaks                        |

|            |     |       |       |      |                              |
|------------|-----|-------|-------|------|------------------------------|
| ceoA       | 49C | 28.38 | 82.03 | 1.98 | MultipleMeltPeaks            |
| cepA       | 49C |       |       |      | LowEfficiency, CtIsSmall, S: |
| cfiA       | 49C |       |       |      | NoAmplification              |
| cfr        | 49C |       |       |      | CurveFitFailed               |
| cfxA       | 49C | 20.83 | 77.57 | 1.93 |                              |
| cmeA       | 49C |       |       |      | LowEfficiency, CtIsSmall, Ci |
| cmlA1-01   | 49C |       |       |      | LowEfficiency, CtIsSmall, Ci |
| cmlA1-02   | 49C | 37.64 | 80.45 | 1.82 | MultipleMeltPeaks            |
| cmr        | 49C |       |       |      | LowEfficiency, CtIsSmall, S: |
| cmx(A)     | 49C | 30.72 | 84.45 | 1.83 |                              |
| cphA-01    | 49C |       |       |      | NoAmplification              |
| cphA-02    | 49C | 35.87 | 81.73 | 1.91 |                              |
| dfrA1      | 49C | 38.03 | 78.66 | 1.8  | MultipleMeltPeaks            |
| dfrA12     | 49C |       |       |      | BadR2, LowEfficiency, CtIsS  |
| emrD       | 49C | 30.84 | 81.74 | 1.84 | MultipleMeltPeaks            |
| ereA       | 49C |       |       |      | CurveFitFailed               |
| ereB       | 49C |       |       |      | CurveFitFailed               |
| erm(34)    | 49C |       |       |      | NoAmplification              |
| erm(35)    | 49C |       |       |      | LowEfficiency, CtIsSmall, Ci |
| erm(36)    | 49C | 35.81 | 86.43 | 1.96 |                              |
| ermA       | 49C |       |       |      | LowEfficiency, CtIsSmall, Ci |
| ermA/ermTR | 49C |       |       |      | NoAmplification              |
| ermB       | 49C | 25.6  | 74.81 | 2.02 |                              |
| ermC       | 49C | 29.5  | 75.41 | 1.91 |                              |
| ermF       | 49C |       |       |      | LowEfficiency, CtIsSmall, S: |
| ermJ/ermD  | 49C |       |       |      | LowEfficiency, CtIsSmall, S: |
| ermK-01    | 49C |       |       |      | CurveFitFailed               |
| ermK-02    | 49C |       |       |      | NoAmplification              |
| ermT-01    | 49C |       |       |      | CurveFitFailed               |
| ermT-02    | 49C |       |       |      | CurveFitFailed               |
| ermX       | 49C | 36.7  | 85.55 | 1.73 |                              |
| ermY       | 49C |       |       |      | LowEfficiency, CtIsSmall, S: |
| fabK       | 49C | 19.39 | 79.54 | 2.2  |                              |
| floR       | 49C |       |       |      | NoAmplification              |
| folA       | 49C | 35.19 | 81.54 | 1.99 |                              |
| fosB       | 49C |       |       |      | LowEfficiency, CtIsSmall, S: |
| fosX       | 49C |       |       |      | CurveFitFailed               |
| fox5       | 49C | 29.02 | 86.32 | 1.82 |                              |
| imiR       | 49C |       |       |      | CurveFitFailed               |
| ImrA-01    | 49C | 37.26 | 82.64 | 2    |                              |
| intl       | 49C | 30.05 | 84.67 | 1.93 | MultipleMeltPeaks            |
| intl1      | 49C | 21.18 | 87.08 | 2.01 |                              |
| IS613      | 49C | 25.76 | 79.42 | 1.95 |                              |
| lnuA-01    | 49C |       |       |      | LowEfficiency, CtIsSmall, Ci |
| lnuB-01    | 49C |       |       |      | LowEfficiency, CtIsSmall, S: |
| lnuB-02    | 49C |       |       |      | LowEfficiency, CtIsSmall, Ci |

|                |     |       |       |      |                              |
|----------------|-----|-------|-------|------|------------------------------|
| lnuC           | 49C | 35.41 | 84.09 | 1.76 |                              |
| marR-01        | 49C | 35.11 | 91.04 | 1.84 | MultipleMeltPeaks            |
| matA/mel       | 49C | 17.43 | 77.6  | 2.08 |                              |
| mdet1          | 49C |       |       |      | LowEfficiency, CtIsSmall, Ci |
| mdtA           | 49C |       |       |      | CurveFitFailed               |
| mdtE/yhiU      | 49C | 25.45 | 80.95 | 1.93 |                              |
| mecA           | 49C |       |       |      | LowEfficiency, CtIsSmall, Ci |
| mefA           | 49C | 16.69 | 80.42 | 2.06 |                              |
| mepA           | 49C | 29.93 | 81.32 | 1.98 | MultipleMeltPeaks            |
| mexA           | 49C |       |       |      | CurveFitFailed               |
| mexD           | 49C | 33.6  | 79.97 | 2.1  |                              |
| mexE           | 49C | 36.99 | 87.26 | 1.83 |                              |
| mexF           | 49C | 31.14 | 87.47 | 1.67 | MultipleMeltPeaks            |
| mphA-01        | 49C | 29.23 | 87.3  | 1.97 | MultipleMeltPeaks            |
| mphA-02        | 49C |       |       |      | LowEfficiency, CurveFitFail  |
| mphB           | 49C | 33.74 | 84.82 | 2.05 |                              |
| mphC           | 49C |       |       |      | LowEfficiency, CtIsSmall, Ci |
| msrA-01        | 49C |       |       |      | LowEfficiency, CtIsSmall, Ci |
| msrC-01        | 49C |       |       |      | NoAmplification              |
| mtrC-01        | 49C | 40.38 | 82.62 | 1.73 | MultipleMeltPeaks            |
| mtrC-02        | 49C |       |       |      | LowEfficiency, CtIsSmall, Ci |
| mtrD-02        | 49C | 28.24 | 81.09 | 1.92 | MultipleMeltPeaks            |
| mtrD-03        | 49C | 28.21 | 79.87 | 1.8  |                              |
| NDM1           | 49C |       |       |      | LowEfficiency, CtIsSmall, Ci |
| nimE           | 49C |       |       |      | LowEfficiency, CtIsSmall, Ci |
| nisB           | 49C | 31.43 | 75.61 | 1.93 |                              |
| oleC           | 49C | 35.06 | 87.26 | 1.9  | MultipleMeltPeaks            |
| oprD           | 49C | 29.18 | 82.11 | 2.04 | MultipleMeltPeaks            |
| oprJ           | 49C | 32.48 | 91.86 | 1.85 |                              |
| pbp            | 49C |       |       |      | CurveFitFailed               |
| pbp2x          | 49C |       |       |      | LowEfficiency, CtIsSmall, Ci |
| Pbp5           | 49C |       |       |      | LowEfficiency, CtIsSmall, Ci |
| penA           | 49C | 37.87 | 85.72 | 1.66 | MultipleMeltPeaks            |
| pikR1          | 49C | 32.73 | 89.39 | 1.9  |                              |
| pikR2          | 49C | 32.89 | 81.55 | 1.78 | MultipleMeltPeaks            |
| pmrA           | 49C | 21.15 | 79.34 | 2.07 |                              |
| pncA           | 49C | 25.47 | 89.95 | 1.89 |                              |
| putative multi | 49C |       |       |      | LowEfficiency, CtIsSmall, S  |
| qac            | 49C | 33.84 | 74.52 | 2.03 |                              |
| qacA           | 49C | 28.72 | 80.9  | 2    |                              |
| qacA/qacB      | 49C |       |       |      | LowEfficiency, CtIsSmall, Ci |
| qacEdelta1-0   | 49C |       |       |      | CurveFitFailed               |
| qacEdelta1-0   | 49C | 30.01 | 80.42 | 1.98 | MultipleMeltPeaks            |
| qacH-01        | 49C | 33.99 | 83.4  | 1.95 | MultipleMeltPeaks            |
| qacH-02        | 49C | 35.74 | 79.01 | 1.88 | MultipleMeltPeaks            |
| qnrA           | 49C |       |       |      | BadR2, LowEfficiency, CtIsS  |

|              |     |       |       |      |                              |
|--------------|-----|-------|-------|------|------------------------------|
| rarD-02      | 49C | 25.17 | 80.45 | 1.86 |                              |
| sat4         | 49C | 29.6  | 74.75 | 1.99 |                              |
| sdeB         | 49C |       |       |      | CurveFitFailed               |
| spcN-01      | 49C |       |       |      | LowEfficiency, CtIsSmall, Ci |
| speA         | 49C |       |       |      | NoAmplification              |
| str          | 49C |       |       |      | LowEfficiency, CtIsSmall, Ci |
| strA         | 49C |       |       |      | LowEfficiency, CtIsSmall, Ci |
| strB         | 49C | 28.97 | 83.75 | 1.95 |                              |
| sul1         | 49C | 36.96 | 89.46 | 1.64 | MultipleMeltPeaks            |
| sul2         | 49C | 34.01 | 77.54 | 1.7  |                              |
| sulA/foIP-01 | 49C | 18.75 | 81.02 | 2.02 |                              |
| sulA/foIP-03 | 49C | 18.74 | 83.82 | 2.02 |                              |
| tet(32)      | 49C | 27.86 | 80.51 | 1.99 |                              |
| tet(34)      | 49C | 33.09 | 75.23 | 2.01 |                              |
| tet(35)      | 49C |       |       |      | NoAmplification              |
| tet(36)-A    | 49C |       |       |      | CurveFitFailed               |
| tet(36)-B    | 49C |       |       |      | LowEfficiency, CtIsSmall, Ci |
| tet(37)      | 49C | 28.13 | 83.83 | 1.98 | MultipleMeltPeaks            |
| tetA-01      | 49C | 32.59 | 85.02 | 1.98 |                              |
| tetA-02      | 49C | 35.93 | 87.17 | 1.89 | MultipleMeltPeaks            |
| tetB-01      | 49C | 30.02 | 79.11 | 1.91 | MultipleMeltPeaks            |
| tetB-02      | 49C | 28.39 | 79.62 | 2.01 |                              |
| tetC-01      | 49C | 29.09 | 75.06 | 1.99 |                              |
| tetC-02      | 49C | 28.63 | 75.96 | 2.06 |                              |
| tetD-01      | 49C |       |       |      | LowEfficiency, CtIsSmall, Ci |
| tetD-02      | 49C | 29.72 | 80.89 | 1.96 |                              |
| tetE         | 49C | 33.44 | 85.87 | 2.03 |                              |
| tetG-01      | 49C |       |       |      | BadR2, LowEfficiency, CtIsS  |
| tetG-02      | 49C | 37.53 | 89.14 | 1.73 | MultipleMeltPeaks            |
| tetH         | 49C |       |       |      | LowEfficiency, CtIsSmall, Ci |
| tetJ         | 49C |       |       |      | LowEfficiency, CtIsSmall, Ci |
| tetK         | 49C |       |       |      | CurveFitFailed               |
| tetL-01      | 49C |       |       |      | LowEfficiency, CtIsSmall, Ci |
| tetL-02      | 49C | 31.71 | 83.09 | 1.96 |                              |
| tetM-01      | 49C | 20.18 | 76.03 | 2.03 |                              |
| tetM-02      | 49C | 20.32 | 77.72 | 2.05 |                              |
| tetO-01      | 49C |       |       |      | LowEfficiency, CtIsSmall, S; |
| tetPA        | 49C |       |       |      | LowEfficiency, CtIsSmall, Ci |
| tetPB-01     | 49C |       |       |      | CurveFitFailed               |
| tetPB-02     | 49C | 28.86 | 84.82 | 2.07 |                              |
| tetPB-03     | 49C |       |       |      | LowEfficiency, CtIsSmall, S; |
| tetPB-05     | 49C |       |       |      | LowEfficiency, CtIsSmall, S; |
| tetQ         | 49C | 22.58 | 76.56 | 2.1  |                              |
| tetR-02      | 49C | 32.43 | 89.08 | 1.74 | MultipleMeltPeaks            |
| tetR-03      | 49C | 29.46 | 75.91 | 1.98 |                              |
| tetS         | 49C | 30.01 | 85.65 | 1.67 |                              |

|             |     |       |       |      |                              |
|-------------|-----|-------|-------|------|------------------------------|
| tetT        | 49C |       |       |      | LowEfficiency, CtIsSmall, Ci |
| tetU-01     | 49C |       |       |      | LowEfficiency, CtIsSmall, Ci |
| tetV        | 49C | 33.23 | 89.19 | 1.85 |                              |
| tetW-01     | 49C |       |       |      | LowEfficiency, CtIsSmall, S: |
| tetX        | 49C |       |       |      | LowEfficiency, CtIsSmall, S: |
| tnpA-01     | 49C |       |       |      | LowEfficiency, CtIsSmall, Ci |
| tnpA-02     | 49C | 28.46 | 84.88 | 1.79 |                              |
| tnpA-03     | 49C | 35.24 | 74.13 | 2.12 |                              |
| tnpA-04     | 49C | 29.41 | 82.28 | 1.91 |                              |
| tnpA-05     | 49C |       |       |      | CurveFitFailed               |
| tnpA-07     | 49C |       |       |      | LowEfficiency, CtIsSmall, Ci |
| tolC-01     | 49C | 25.04 | 78.82 | 1.98 |                              |
| tolC-02     | 49C | 26.54 | 84.46 | 1.93 | MultipleMeltPeaks            |
| tolC-03     | 49C | 28.02 | 79.23 | 1.79 | MultipleMeltPeaks            |
| Tp614       | 49C |       |       |      | LowEfficiency, CtIsSmall, Ci |
| ttgA        | 49C | 38.08 | 76.84 | 1.73 | MultipleMeltPeaks            |
| ttgB        | 49C | 36.96 | 87.94 | 1.82 | MultipleMeltPeaks            |
| vanA        | 49C |       |       |      | LowEfficiency, CtIsSmall, Ci |
| vanB-01     | 49C | 33.15 | 81.61 | 1.94 |                              |
| vanC-01     | 49C |       |       |      | LowEfficiency, CtIsSmall, Ci |
| vanC-02     | 49C |       |       |      | LowEfficiency, CtIsSmall, Ci |
| vanC-03     | 49C | 26.61 | 85.94 | 1.98 |                              |
| vanC1       | 49C |       |       |      | LowEfficiency, CtIsSmall, Ci |
| vanC2/vanC3 | 49C | 34.41 | 84.81 | 2.01 |                              |
| vanG        | 49C |       |       |      | CurveFitFailed               |
| vanHB       | 49C | 34.91 | 85.04 | 1.92 |                              |
| vanHD       | 49C |       |       |      | LowEfficiency, CtIsSmall, Ci |
| vanRA-01    | 49C |       |       |      | LowEfficiency, CtIsSmall, Ci |
| vanRA-02    | 49C |       |       |      | NoAmplification              |
| vanRB       | 49C | 37.16 | 75.08 | 1.91 |                              |
| vanRC       | 49C |       |       |      | LowEfficiency, CtIsSmall, Ci |
| vanRC4      | 49C |       |       |      | LowEfficiency, CtIsSmall, S: |
| vanRD       | 49C |       |       |      | LowEfficiency, CtIsSmall, S: |
| vanSA       | 49C |       |       |      | LowEfficiency, CtIsSmall, S: |
| vanSB       | 49C | 32.01 | 74.08 | 1.99 |                              |
| vanSC-01    | 49C | 36.92 | 86.21 | 1.9  | MultipleMeltPeaks            |
| vanSC-02    | 49C |       |       |      | NoAmplification              |
| vanTC-01    | 49C |       |       |      | LowEfficiency, CtIsSmall, Ci |
| vanTC-02    | 49C | 37.85 | 86.33 | 1.7  |                              |
| vanTE       | 49C | 32.36 | 88.63 | 1.9  |                              |
| vanTG       | 49C |       |       |      | LowEfficiency, CtIsSmall, Ci |
| vanWB       | 49C |       |       |      | CurveFitFailed               |
| vanWG       | 49C |       |       |      | CurveFitFailed               |
| vanXA       | 49C |       |       |      | LowEfficiency, CtIsSmall, S: |
| vanXB       | 49C |       |       |      | NoAmplification              |
| vanXD       | 49C | 30.36 | 75.57 | 2    |                              |

|              |     |       |       |      |                              |
|--------------|-----|-------|-------|------|------------------------------|
| vanYB        | 49C | 36.25 | 79.19 | 1.9  | MultipleMeltPeaks            |
| vanYD-01     | 49C | 30.11 | 89.06 | 1.73 | MultipleMeltPeaks            |
| vanYD-02     | 49C |       |       |      | LowEfficiency, CtIsSmall, S: |
| vatB-01      | 49C |       |       |      | LowEfficiency, CtIsSmall, C: |
| vatB-02      | 49C |       |       |      | CurveFitFailed               |
| vatC-01      | 49C | 40.11 | 81.25 | 1.73 |                              |
| vatC-02      | 49C | 36.66 | 87.43 | 1.81 |                              |
| vatE-01      | 49C | 30.88 | 76.77 | 2.04 |                              |
| vatE-02      | 49C |       |       |      | NoAmplification              |
| vgaA-01      | 49C | 37.08 | 77.29 | 1.86 |                              |
| vgaA-02      | 49C |       |       |      | LowEfficiency, CtIsSmall, S: |
| vgb-01       | 49C |       |       |      | CurveFitFailed               |
| vgbB-01      | 49C |       |       |      | LowEfficiency, CtIsSmall, S: |
| vgbB-02      | 49C |       |       |      | CurveFitFailed               |
| yceE/mdtG-0  | 49C | 26.35 | 80.79 | 1.98 |                              |
| yceE/mdtG-0  | 49C |       |       |      | LowEfficiency, CtIsSmall, C: |
| yceL/mdtH-0  | 49C | 29.1  | 84.6  | 1.75 |                              |
| yceL/mdtH-0  | 49C | 25.58 | 82.59 | 1.97 |                              |
| yceL/mdtH-0  | 49C | 25.8  | 79.89 | 1.99 |                              |
| yidY/mdtL-01 | 49C | 31.69 | 81.25 | 1.97 | MultipleMeltPeaks            |
| yidY/mdtL-02 | 49C | 25.96 | 80.02 | 1.96 |                              |































| Assay          | Sample | Ct    | Tm   | Efficiency | flag                   |
|----------------|--------|-------|------|------------|------------------------|
| 16S rRNA       | 50A    |       | 12.7 | 82.79      | 1.87                   |
| aac            | 50A    | 35.58 |      | 79.18      | 1.83                   |
| aac(6')-Ib(akz | 50A    |       |      |            | NoAmplification        |
| aac(6')-Ib(akz | 50A    | 37.73 |      | 88.36      | 1.77 MultipleMeltPeaks |
| aac(6')-Ib(akz | 50A    |       |      |            | CurveFitFailed         |
| aac(6')-II     | 50A    | 34.49 |      | 91.89      | 1.89                   |
| aac(6')I1      | 50A    |       |      |            | NoAmplification        |
| aacA/aphD      | 50A    |       |      |            | NoAmplification        |
| aacC           | 50A    | 33.64 |      | 88.1       | 1.9                    |
| aacC1          | 50A    |       |      |            | NoAmplification        |
| aacC2          | 50A    |       |      |            | NoAmplification        |
| aacC4          | 50A    | 30.7  |      | 90.32      | 1.78 MultipleMeltPeaks |
| aadA-01        | 50A    |       |      |            | NoAmplification        |
| aadA-02        | 50A    | 38.61 |      | 62.37      | 1.7 MultipleMeltPeaks  |
| aadA-1-01      | 50A    |       |      |            | NoAmplification        |
| aadA-1-02      | 50A    |       |      |            | NoAmplification        |
| aadA1          | 50A    |       |      |            | NoAmplification        |
| aadA2-01       | 50A    |       |      |            | NoAmplification        |
| aadA2-02       | 50A    |       |      |            | NoAmplification        |
| aadA2-03       | 50A    | 40.98 |      | 85.85      | 1.74 MultipleMeltPeaks |
| aadA5-01       | 50A    | 38.48 |      | 83.2       | 1.83                   |
| aadA5-02       | 50A    |       |      |            | NoAmplification        |
| aadA9-01       | 50A    | 39.34 |      | 66.58      | 1.66 MultipleMeltPeaks |
| aadA9-02       | 50A    |       |      |            | NoAmplification        |
| aadD           | 50A    |       |      |            | NoAmplification        |
| aadE           | 50A    |       |      |            | NoAmplification        |
| acrA-01        | 50A    | 31.51 |      | 85.13      | 1.87                   |
| acrA-02        | 50A    | 30.32 |      | 89.66      | 1.9                    |
| acrA-03        | 50A    |       |      |            | NoAmplification        |
| acrA-04        | 50A    | 34.49 |      | 86         | 1.89                   |
| acrA-05        | 50A    | 30.76 |      | 91.33      | 1.89                   |
| acrB-01        | 50A    |       |      |            | NoAmplification        |
| acrF           | 50A    | 28.15 |      | 83.06      | 1.82                   |
| acrR-01        | 50A    |       |      |            | NoAmplification        |
| acrR-02        | 50A    |       |      |            | NoAmplification        |
| Actin          | 50A    | 23.12 |      | 87.81      | 1.89                   |
| adeA           | 50A    | 38    |      | 84.65      | 1.87                   |
| ampC-01        | 50A    | 32.7  |      | 81         | 1.87                   |
| ampC-02        | 50A    | 29.91 |      | 82.37      | 1.83                   |
| ampC-04        | 50A    |       |      |            | NoAmplification        |
| ampC-05        | 50A    |       |      |            | NoAmplification        |
| ampC-06        | 50A    |       |      |            | NoAmplification        |
| ampC-07        | 50A    |       |      |            | CurveFitFailed         |
| ampC-09        | 50A    |       |      |            | NoAmplification        |
| ampC/blaDH     | 50A    |       |      |            | CurveFitFailed         |

|                          |     |       |       |      |                   |
|--------------------------|-----|-------|-------|------|-------------------|
| aph                      | 50A |       |       |      | NoAmplification   |
| aph(2')-Id-01            | 50A |       |       |      | NoAmplification   |
| aph(2')-Id-02            | 50A |       |       |      | NoAmplification   |
| aph6ia                   | 50A | 28.48 | 78.65 | 1.97 |                   |
| aphA1(aka k <sub>z</sub> | 50A | 27.47 | 76.88 | 2.04 |                   |
| bacA-01                  | 50A | 39.46 | 85.78 | 1.77 | MultipleMeltPeaks |
| bacA-02                  | 50A | 41.68 | 75.67 | 1.69 |                   |
| BETA-globin              | 50A | 24.51 | 84.76 | 1.95 |                   |
| bla-ACC-1                | 50A |       |       |      | NoAmplification   |
| bla-L1                   | 50A | 34.07 | 80.66 | 1.93 | MultipleMeltPeaks |
| bla1                     | 50A |       |       |      | NoAmplification   |
| blaCMY                   | 50A | 37.22 | 81.03 | 1.9  |                   |
| blaCMY2-01               | 50A | 38.69 | 75.85 | 1.83 |                   |
| blaCMY2-02               | 50A | 33.7  | 86.22 | 1.93 | MultipleMeltPeaks |
| blaCTX-M-01              | 50A | 40.75 | 87.03 | 1.71 | MultipleMeltPeaks |
| blaCTX-M-02              | 50A |       |       |      | NoAmplification   |
| blaCTX-M-03              | 50A |       |       |      | NoAmplification   |
| blaCTX-M-04              | 50A | 32.68 | 80.62 | 1.84 |                   |
| blaCTX-M-05              | 50A |       |       |      | NoAmplification   |
| blaCTX-M-06              | 50A |       |       |      | NoAmplification   |
| blaGES                   | 50A |       |       |      | NoAmplification   |
| blaIMP-01                | 50A |       |       |      | NoAmplification   |
| blaIMP-02                | 50A |       |       |      | NoAmplification   |
| blaMOX/blaC              | 50A |       |       |      | NoAmplification   |
| blaOCH                   | 50A | 29.38 | 82.59 | 1.76 | MultipleMeltPeaks |
| blaOKP                   | 50A |       |       |      | NoAmplification   |
| blaOXA1/blaC             | 50A |       |       |      | NoAmplification   |
| blaOXA10-01              | 50A |       |       |      | NoAmplification   |
| blaOXA10-02              | 50A |       |       |      | NoAmplification   |
| blaOXY                   | 50A |       |       |      | NoAmplification   |
| blaPAO                   | 50A |       |       |      | NoAmplification   |
| blaPER                   | 50A |       |       |      | NoAmplification   |
| blaPSE                   | 50A |       |       |      | NoAmplification   |
| blaROB                   | 50A |       |       |      | NoAmplification   |
| blaSFO                   | 50A | 37.45 | 89.47 | 1.75 | MultipleMeltPeaks |
| blaSHV-01                | 50A |       |       |      | NoAmplification   |
| blaSHV-02                | 50A |       |       |      | NoAmplification   |
| blaTEM                   | 50A | 20.11 | 80.07 | 1.67 |                   |
| blaTLA                   | 50A |       |       |      | NoAmplification   |
| blaVEB                   | 50A |       |       |      | NoAmplification   |
| blaVIM                   | 50A | 37.82 | 89.19 | 1.75 |                   |
| blaZ                     | 50A |       |       |      | NoAmplification   |
| carB                     | 50A |       |       |      | NoAmplification   |
| catA1                    | 50A |       |       |      | NoAmplification   |
| catB3                    | 50A |       |       |      | NoAmplification   |
| catB8                    | 50A | 36.76 | 80.55 | 1.83 |                   |

|            |     |       |       |      |                              |
|------------|-----|-------|-------|------|------------------------------|
| ceoA       | 50A | 31.81 | 92.88 | 1.91 | MultipleMeltPeaks            |
| cepA       | 50A |       |       |      | NoAmplification              |
| cfiA       | 50A |       |       |      | NoAmplification              |
| cfr        | 50A |       |       |      | NoAmplification              |
| cfxA       | 50A | 20.47 | 78.23 | 1.9  |                              |
| cmeA       | 50A | 38.31 | 79.14 | 1.68 |                              |
| cmlA1-01   | 50A |       |       |      | NoAmplification              |
| cmlA1-02   | 50A | 31.97 | 91.18 | 1.89 |                              |
| cmr        | 50A |       |       |      | NoAmplification              |
| cmx(A)     | 50A | 31.92 | 88.03 | 1.9  |                              |
| cphA-01    | 50A | 34.35 | 88.41 | 1.85 |                              |
| cphA-02    | 50A | 37.87 | 84.27 | 1.78 |                              |
| dfrA1      | 50A |       |       |      | NoAmplification              |
| dfrA12     | 50A |       |       |      | NoAmplification              |
| emrD       | 50A |       |       |      | NoAmplification              |
| ereA       | 50A |       |       |      | NoAmplification              |
| ereB       | 50A | 35.88 | 90.6  | 1.85 |                              |
| erm(34)    | 50A | 37.34 | 89    | 1.8  |                              |
| erm(35)    | 50A |       |       |      | NoAmplification              |
| erm(36)    | 50A | 39.19 | 62.7  | 1.61 | MultipleMeltPeaks            |
| ermA       | 50A |       |       |      | NoAmplification              |
| ermA/ermTR | 50A |       |       |      | NoAmplification              |
| ermB       | 50A | 19.26 | 75.6  | 2.07 |                              |
| ermC       | 50A |       |       |      | NoAmplification              |
| ermF       | 50A | 28.12 | 75.2  | 1.97 |                              |
| ermJ/ermD  | 50A |       |       |      | NoAmplification              |
| ermK-01    | 50A | 37.98 | 73.6  | 1.99 |                              |
| ermK-02    | 50A | 31.5  | 87.19 | 1.85 |                              |
| ermT-01    | 50A |       |       |      | NoAmplification              |
| ermT-02    | 50A |       |       |      | NoAmplification              |
| ermX       | 50A |       |       |      | NoAmplification              |
| ermY       | 50A |       |       |      | NoAmplification              |
| fabK       | 50A | 23.33 | 79.31 | 2.05 |                              |
| floR       | 50A | 40.03 | 62.78 | 1.71 | MultipleMeltPeaks            |
| folA       | 50A |       |       |      | NoAmplification              |
| fosB       | 50A |       |       |      | LowEfficiency, CtIsSmall, S: |
| fosX       | 50A |       |       |      | NoAmplification              |
| fox5       | 50A | 28.74 | 84.72 | 1.86 |                              |
| imiR       | 50A |       |       |      | NoAmplification              |
| lmrA-01    | 50A |       |       |      | NoAmplification              |
| intl       | 50A | 36.83 | 85.18 | 1.83 | MultipleMeltPeaks            |
| intl1      | 50A | 22.9  | 88.57 | 1.97 |                              |
| IS613      | 50A | 20.75 | 80.26 | 2.02 |                              |
| lnuA-01    | 50A |       |       |      | NoAmplification              |
| lnuB-01    | 50A |       |       |      | NoAmplification              |
| lnuB-02    | 50A |       |       |      | NoAmplification              |

|               |     |       |       |      |                   |
|---------------|-----|-------|-------|------|-------------------|
| lnuC          | 50A |       |       |      | CurveFitFailed    |
| marR-01       | 50A | 36.53 | 86.02 | 1.86 |                   |
| matA/mel      | 50A | 14.72 | 78.26 | 2.04 |                   |
| mdet1         | 50A |       |       |      | NoAmplification   |
| mdtA          | 50A |       |       |      | CurveFitFailed    |
| mdtE/yhiU     | 50A | 31.57 | 92.62 | 1.89 |                   |
| mecA          | 50A |       |       |      | NoAmplification   |
| mefA          | 50A | 13.99 | 81.18 | 1.98 |                   |
| mepA          | 50A | 33.58 | 91.08 | 1.91 |                   |
| mexA          | 50A |       |       |      | NoAmplification   |
| mexD          | 50A |       |       |      | NoAmplification   |
| mexE          | 50A | 33.96 | 88.94 | 1.9  |                   |
| mexF          | 50A | 30.28 | 90.9  | 1.8  | MultipleMeltPeaks |
| mphA-01       | 50A | 29.8  | 92.27 | 1.95 |                   |
| mphA-02       | 50A | 30.03 | 86.89 | 1.68 | MultipleMeltPeaks |
| mphB          | 50A |       |       |      | NoAmplification   |
| mphC          | 50A |       |       |      | NoAmplification   |
| msrA-01       | 50A |       |       |      | CurveFitFailed    |
| msrC-01       | 50A |       |       |      | NoAmplification   |
| mtrC-01       | 50A |       |       |      | NoAmplification   |
| mtrC-02       | 50A |       |       |      | NoAmplification   |
| mtrD-02       | 50A | 29.83 | 83.76 | 1.97 |                   |
| mtrD-03       | 50A | 30.38 | 82.53 | 1.8  |                   |
| NDM1          | 50A |       |       |      | NoAmplification   |
| nimE          | 50A |       |       |      | NoAmplification   |
| nisB          | 50A | 36.58 | 74.84 | 1.85 |                   |
| oleC          | 50A | 36.84 | 88.37 | 1.86 |                   |
| oprD          | 50A | 29.86 | 89.73 | 1.91 |                   |
| oprJ          | 50A | 31.7  | 91.94 | 1.8  |                   |
| pbp           | 50A |       |       |      | NoAmplification   |
| pbp2x         | 50A |       |       |      | NoAmplification   |
| Pbp5          | 50A |       |       |      | NoAmplification   |
| penA          | 50A |       |       |      | NoAmplification   |
| pikR1         | 50A | 36.89 | 86.95 | 1.86 | MultipleMeltPeaks |
| pikR2         | 50A | 30.92 | 89.23 | 1.62 |                   |
| pmrA          | 50A | 21.12 | 80.44 | 2.01 |                   |
| pncA          | 50A | 31.24 | 88.43 | 1.81 |                   |
| putative mult | 50A |       |       |      | NoAmplification   |
| qac           | 50A |       |       |      | CurveFitFailed    |
| qacA          | 50A | 29.08 | 81.5  | 1.97 |                   |
| qacA/qacB     | 50A |       |       |      | NoAmplification   |
| qacEdelta1-0  | 50A |       |       |      | NoAmplification   |
| qacEdelta1-0  | 50A | 33.75 | 75.54 | 1.92 | MultipleMeltPeaks |
| qacH-01       | 50A | 38.42 | 91.11 | 1.79 | MultipleMeltPeaks |
| qacH-02       | 50A |       |       |      | NoAmplification   |
| qnrA          | 50A |       |       |      | NoAmplification   |



|              |     |       |       |      |                           |
|--------------|-----|-------|-------|------|---------------------------|
| rarD-02      | 50A |       |       |      | NoAmplification           |
| sat4         | 50A |       |       |      | NoAmplification           |
| sdeB         | 50A |       |       |      | NoAmplification           |
| spcN-01      | 50A |       |       |      | NoAmplification           |
| speA         | 50A |       |       |      | NoAmplification           |
| str          | 50A |       |       |      | NoAmplification           |
| strA         | 50A |       |       |      | NoAmplification           |
| strB         | 50A | 19.89 | 84.82 | 1.91 |                           |
| sul1         | 50A |       |       |      | NoAmplification           |
| sul2         | 50A | 23.9  | 90.73 | 1.82 |                           |
| sulA/foIP-01 | 50A | 18.77 | 82.39 | 1.94 |                           |
| sulA/foIP-03 | 50A | 19.63 | 84.75 | 1.92 |                           |
| tet(32)      | 50A | 28.8  | 81.51 | 1.94 |                           |
| tet(34)      | 50A | 36.58 | 85.15 | 1.82 |                           |
| tet(35)      | 50A |       |       |      | NoAmplification           |
| tet(36)-A    | 50A | 36.44 | 76.29 | 1.9  |                           |
| tet(36)-B    | 50A |       |       |      | NoAmplification           |
| tet(37)      | 50A | 21.82 | 76.56 | 1.97 |                           |
| tetA-01      | 50A | 30.55 | 85.57 | 1.88 |                           |
| tetA-02      | 50A | 35.3  | 88.37 | 1.85 |                           |
| tetB-01      | 50A |       |       |      | CurveFitFailed            |
| tetB-02      | 50A | 38.76 | 77.83 | 1.77 | MultipleMeltPeaks         |
| tetC-01      | 50A |       |       |      | NoAmplification           |
| tetC-02      | 50A |       |       |      | NoAmplification           |
| tetD-01      | 50A |       |       |      | NoAmplification           |
| tetD-02      | 50A | 30.48 | 78.46 | 1.91 |                           |
| tetE         | 50A |       |       |      | NoAmplification           |
| tetG-01      | 50A |       |       |      | CurveFitFailed            |
| tetG-02      | 50A | 32.9  | 86.79 | 1.76 |                           |
| tetH         | 50A |       |       |      | NoAmplification           |
| tetJ         | 50A |       |       |      | NoAmplification           |
| tetK         | 50A |       |       |      | NoAmplification           |
| tetL-01      | 50A |       |       |      | NoAmplification           |
| tetL-02      | 50A | 33.52 | 83.91 | 1.95 |                           |
| tetM-01      | 50A | 17.26 | 76.82 | 1.94 |                           |
| tetM-02      | 50A | 17.19 | 78.53 | 2.03 |                           |
| tetO-01      | 50A |       |       |      | NoAmplification           |
| tetPA        | 50A |       |       |      | NoAmplification           |
| tetPB-01     | 50A |       |       |      | NoAmplification           |
| tetPB-02     | 50A | 29.77 | 85.35 | 1.99 |                           |
| tetPB-03     | 50A |       |       |      | NoAmplification           |
| tetPB-05     | 50A |       |       |      | CtIsLarge, CurveFitFailed |
| tetQ         | 50A | 21.98 | 77.92 | 2    |                           |
| tetR-02      | 50A | 30.02 | 92.36 | 1.94 |                           |
| tetR-03      | 50A |       |       |      | NoAmplification           |
| tetS         | 50A | 40.47 | 86.16 | 1.71 | MultipleMeltPeaks         |

|             |     |       |       |      |                           |
|-------------|-----|-------|-------|------|---------------------------|
| tetT        | 50A |       |       |      | NoAmplification           |
| tetU-01     | 50A |       |       |      | NoAmplification           |
| tetV        | 50A |       |       |      | NoAmplification           |
| tetW-01     | 50A |       |       |      | NoAmplification           |
| tetX        | 50A |       |       |      | NoAmplification           |
| tnpA-01     | 50A |       |       |      | NoAmplification           |
| tnpA-02     | 50A | 20.26 | 85.75 | 1.75 |                           |
| tnpA-03     | 50A | 37.36 | 87.03 | 1.81 | MultipleMeltPeaks         |
| tnpA-04     | 50A |       |       |      | NoAmplification           |
| tnpA-05     | 50A |       |       |      | NoAmplification           |
| tnpA-07     | 50A |       |       |      | NoAmplification           |
| tolC-01     | 50A | 38.04 | 75.69 | 1.92 | MultipleMeltPeaks         |
| tolC-02     | 50A | 33.77 | 84.5  | 1.92 | MultipleMeltPeaks         |
| tolC-03     | 50A | 34.19 | 88.85 | 1.89 |                           |
| Tp614       | 50A |       |       |      | NoAmplification           |
| ttgA        | 50A |       |       |      | NoAmplification           |
| ttgB        | 50A |       |       |      | NoAmplification           |
| vanA        | 50A |       |       |      | NoAmplification           |
| vanB-01     | 50A | 32.79 | 85.64 | 1.96 | MultipleMeltPeaks         |
| vanC-01     | 50A |       |       |      | NoAmplification           |
| vanC-02     | 50A |       |       |      | NoAmplification           |
| vanC-03     | 50A | 28.77 | 92.23 | 1.96 |                           |
| vanC1       | 50A |       |       |      | NoAmplification           |
| vanC2/vanC3 | 50A |       |       |      | CurveFitFailed            |
| vanG        | 50A |       |       |      | NoAmplification           |
| vanHB       | 50A | 36.47 | 88.75 | 1.8  |                           |
| vanHD       | 50A |       |       |      | CurveFitFailed            |
| vanRA-01    | 50A |       |       |      | NoAmplification           |
| vanRA-02    | 50A |       |       |      | NoAmplification           |
| vanRB       | 50A | 38.75 | 84.41 | 1.74 | MultipleMeltPeaks         |
| vanRC       | 50A |       |       |      | NoAmplification           |
| vanRC4      | 50A |       |       |      | NoAmplification           |
| vanRD       | 50A |       |       |      | NoAmplification           |
| vanSA       | 50A |       |       |      | NoAmplification           |
| vanSB       | 50A | 30.22 | 74.99 | 1.9  |                           |
| vanSC-01    | 50A | 38.38 | 78.47 | 1.85 |                           |
| vanSC-02    | 50A | 32.06 | 76.42 | 1.78 |                           |
| vanTC-01    | 50A |       |       |      | NoAmplification           |
| vanTC-02    | 50A |       |       |      | NoAmplification           |
| vanTE       | 50A |       |       |      | NoAmplification           |
| vanTG       | 50A |       |       |      | NoAmplification           |
| vanWB       | 50A |       |       |      | NoAmplification           |
| vanWG       | 50A |       |       |      | CtIsLarge, CurveFitFailed |
| vanXA       | 50A |       |       |      | NoAmplification           |
| vanXB       | 50A |       |       |      | NoAmplification           |
| vanXD       | 50A | 31.7  | 76.2  | 1.95 |                           |

|              |     |       |       |      |                   |
|--------------|-----|-------|-------|------|-------------------|
| vanYB        | 50A |       |       |      | NoAmplification   |
| vanYD-01     | 50A | 33.77 | 89.56 | 1.82 |                   |
| vanYD-02     | 50A |       |       |      | NoAmplification   |
| vatB-01      | 50A |       |       |      | NoAmplification   |
| vatB-02      | 50A |       |       |      | NoAmplification   |
| vatC-01      | 50A | 32.56 | 81.88 | 1.9  |                   |
| vatC-02      | 50A |       |       |      | NoAmplification   |
| vatE-01      | 50A | 29.74 | 76.12 | 1.92 |                   |
| vatE-02      | 50A |       |       |      | NoAmplification   |
| vgaA-01      | 50A |       |       |      | NoAmplification   |
| vgaA-02      | 50A |       |       |      | NoAmplification   |
| vgb-01       | 50A |       |       |      | NoAmplification   |
| vgbB-01      | 50A |       |       |      | NoAmplification   |
| vgbB-02      | 50A |       |       |      | NoAmplification   |
| yceE/mdtG-0  | 50A | 28.35 | 81.71 | 1.98 |                   |
| yceE/mdtG-0  | 50A |       |       |      | NoAmplification   |
| yceL/mdtH-0  | 50A | 34.44 | 86.82 | 1.89 |                   |
| yceL/mdtH-0  | 50A |       |       |      | NoAmplification   |
| yceL/mdtH-0  | 50A | 37.13 | 86.69 | 1.77 | MultipleMeltPeaks |
| yidY/mdtL-01 | 50A | 33.04 | 87.5  | 1.96 |                   |
| yidY/mdtL-02 | 50A |       |       |      | NoAmplification   |































| Assay           | Sample | Ct | Tm    | Efficiency | flag                         |
|-----------------|--------|----|-------|------------|------------------------------|
| 16S rRNA        | 50B    |    | 13.99 | 82.31      | 2.02                         |
| aac             | 50B    |    | 33.07 | 85.41      | 1.93                         |
| aac(6')-Ib(akz) | 50B    |    |       |            | LowEfficiency, CtIsSmall, S: |
| aac(6')-Ib(akz) | 50B    |    | 34.93 | 78.84      | 1.9                          |
| aac(6')-Ib(akz) | 50B    |    | 38.15 | 83.48      | 1.78 MultipleMeltPeaks       |
| aac(6')-II      | 50B    |    |       |            | LowEfficiency, CtIsSmall, S: |
| aac(6')I1       | 50B    |    | 37.68 | 87.1       | 1.77 MultipleMeltPeaks       |
| aacA/aphD       | 50B    |    |       |            | CurveFitFailed               |
| aacC            | 50B    |    | 33.09 | 88.76      | 1.84                         |
| aacC1           | 50B    |    |       |            | NoAmplification              |
| aacC2           | 50B    |    |       |            | NoAmplification              |
| aacC4           | 50B    |    | 33.34 | 89.25      | 1.95 MultipleMeltPeaks       |
| aadA-01         | 50B    |    |       |            | LowEfficiency, CtIsSmall, S: |
| aadA-02         | 50B    |    |       |            | CurveFitFailed               |
| aadA-1-01       | 50B    |    |       |            | NoAmplification              |
| aadA-1-02       | 50B    |    |       |            | LowEfficiency, CtIsSmall, S: |
| aadA1           | 50B    |    | 38.31 | 82.5       | 1.79                         |
| aadA2-01        | 50B    |    |       |            | NoAmplification              |
| aadA2-02        | 50B    |    |       |            | NoAmplification              |
| aadA2-03        | 50B    |    |       |            | CurveFitFailed               |
| aadA5-01        | 50B    |    |       |            | CurveFitFailed               |
| aadA5-02        | 50B    |    | 33.78 | 78.1       | 2                            |
| aadA9-01        | 50B    |    | 34.1  | 87.58      | 1.71                         |
| aadA9-02        | 50B    |    | 36.86 | 73.43      | 1.9                          |
| aadD            | 50B    |    |       |            | NoAmplification              |
| aadE            | 50B    |    |       |            | LowEfficiency, CtIsSmall, S: |
| acrA-01         | 50B    |    | 33.77 | 84.31      | 1.97 MultipleMeltPeaks       |
| acrA-02         | 50B    |    | 38.94 | 85.77      | 1.77                         |
| acrA-03         | 50B    |    | 35.81 | 76.65      | 1.85                         |
| acrA-04         | 50B    |    | 33.96 | 88.76      | 2 MultipleMeltPeaks          |
| acrA-05         | 50B    |    | 30.26 | 90.59      | 2                            |
| acrB-01         | 50B    |    | 37.89 | 77.9       | 1.77                         |
| acrF            | 50B    |    | 32.66 | 82.04      | 1.92                         |
| acrR-01         | 50B    |    | 37.62 | 78.24      | 1.87                         |
| acrR-02         | 50B    |    | 34.16 | 77.6       | 1.96                         |
| Actin           | 50B    |    | 23.32 | 87.14      | 1.95 MultipleMeltPeaks       |
| adeA            | 50B    |    |       |            | NoAmplification              |
| ampC-01         | 50B    |    | 33.54 | 84.67      | 1.99                         |
| ampC-02         | 50B    |    | 36.7  | 89.83      | 1.82                         |
| ampC-04         | 50B    |    |       |            | CurveFitFailed               |
| ampC-05         | 50B    |    |       |            | NoAmplification              |
| ampC-06         | 50B    |    |       |            | LowEfficiency, CtIsSmall, S: |
| ampC-07         | 50B    |    | 36.19 | 83.85      | 1.88                         |
| ampC-09         | 50B    |    |       |            | CurveFitFailed               |
| ampC/blaDH      | 50B    |    | 34.81 | 77.19      | 2.01                         |

|               |     |       |       |      |                              |
|---------------|-----|-------|-------|------|------------------------------|
| aph           | 50B |       |       |      | LowEfficiency, CtIsSmall, S: |
| aph(2')-Id-01 | 50B |       |       |      | CurveFitFailed               |
| aph(2')-Id-02 | 50B |       |       |      | LowEfficiency, CtIsSmall, S: |
| aph6ia        | 50B | 28.74 | 78.28 | 1.97 |                              |
| aphA1(aka k   | 50B |       |       |      | CurveFitFailed               |
| bacA-01       | 50B |       |       |      | LowEfficiency, CtIsSmall, S: |
| bacA-02       | 50B |       |       |      | BadR2, LowEfficiency, CtIsS  |
| BETA-globin   | 50B | 23.45 | 84.27 | 1.99 |                              |
| bla-ACC-1     | 50B |       |       |      | NoAmplification              |
| bla-L1        | 50B | 33.35 | 81.92 | 1.96 |                              |
| bla1          | 50B |       |       |      | LowEfficiency, CtIsSmall, S: |
| blaCMY        | 50B | 39.77 | 80.61 | 1.76 |                              |
| blaCMY2-01    | 50B | 38.36 | 75.32 | 1.86 |                              |
| blaCMY2-02    | 50B | 33.06 | 82.5  | 2.03 | MultipleMeltPeaks            |
| blaCTX-M-01   | 50B |       |       |      | NoAmplification              |
| blaCTX-M-02   | 50B | 38.37 | 63.73 | 1.66 | MultipleMeltPeaks            |
| blaCTX-M-03   | 50B |       |       |      | LowEfficiency, CtIsSmall, S: |
| blaCTX-M-04   | 50B | 37.32 | 82.66 | 1.8  | MultipleMeltPeaks            |
| blaCTX-M-05   | 50B | 36.44 | 75.39 | 1.76 |                              |
| blaCTX-M-06   | 50B |       |       |      | NoAmplification              |
| blaGES        | 50B |       |       |      | LowEfficiency, CtIsSmall, S: |
| blaIMP-01     | 50B |       |       |      | NoAmplification              |
| blaIMP-02     | 50B |       |       |      | LowEfficiency, CtIsSmall, C: |
| blaMOX/blaC   | 50B |       |       |      | NoAmplification              |
| blaOCH        | 50B |       |       |      | NoAmplification              |
| blaOKP        | 50B |       |       |      | NoAmplification              |
| blaOXA1/blaC  | 50B |       |       |      | LowEfficiency, CtIsSmall, S: |
| blaOXA10-01   | 50B |       |       |      | NoAmplification              |
| blaOXA10-02   | 50B |       |       |      | LowEfficiency, CtIsSmall, S: |
| blaOXY        | 50B |       |       |      | CurveFitFailed               |
| blaPAO        | 50B |       |       |      | NoAmplification              |
| blaPER        | 50B |       |       |      | LowEfficiency, CtIsSmall, S: |
| blaPSE        | 50B |       |       |      | NoAmplification              |
| blaROB        | 50B |       |       |      | NoAmplification              |
| blaSFO        | 50B | 31.02 | 88.5  | 1.9  |                              |
| blaSHV-01     | 50B |       |       |      | LowEfficiency, CtIsSmall, S: |
| blaSHV-02     | 50B |       |       |      | CurveFitFailed               |
| blaTEM        | 50B | 20.48 | 79.41 | 1.66 |                              |
| blaTLA        | 50B |       |       |      | CurveFitFailed               |
| blaVEB        | 50B |       |       |      | NoAmplification              |
| blaVIM        | 50B | 42.62 | 83.6  | 1.68 | MultipleMeltPeaks            |
| blaZ          | 50B |       |       |      | LowEfficiency, CtIsSmall, S: |
| carB          | 50B |       |       |      | CurveFitFailed               |
| catA1         | 50B |       |       |      | NoAmplification              |
| catB3         | 50B | 38.19 | 80.01 | 1.78 |                              |
| catB8         | 50B | 35.69 | 80.91 | 1.92 |                              |

|            |     |       |       |      |                              |
|------------|-----|-------|-------|------|------------------------------|
| ceoA       | 50B | 29.9  | 82.03 | 1.91 | MultipleMeltPeaks            |
| cepA       | 50B |       |       |      | NoAmplification              |
| cfiA       | 50B |       |       |      | NoAmplification              |
| cfr        | 50B |       |       |      | LowEfficiency, CtIsSmall, S: |
| cfxA       | 50B | 21.45 | 77.65 | 1.98 |                              |
| cmeA       | 50B |       |       |      | CurveFitFailed               |
| cmlA1-01   | 50B |       |       |      | LowEfficiency, CtIsSmall, S: |
| cmlA1-02   | 50B | 34.63 | 88.81 | 1.75 |                              |
| cmr        | 50B |       |       |      | LowEfficiency, CtIsSmall, Ct |
| cmx(A)     | 50B | 27.68 | 87.19 | 2    |                              |
| cphA-01    | 50B | 31.62 | 85.73 | 1.8  |                              |
| cphA-02    | 50B | 36.49 | 83.66 | 1.86 |                              |
| dfrA1      | 50B | 38.9  | 77.08 | 1.79 |                              |
| dfrA12     | 50B |       |       |      | NoAmplification              |
| emrD       | 50B | 37.75 | 89.44 | 1.68 | MultipleMeltPeaks            |
| ereA       | 50B |       |       |      | LowEfficiency, CtIsSmall, S: |
| ereB       | 50B |       |       |      | CurveFitFailed               |
| erm(34)    | 50B | 35.27 | 83.06 | 1.99 |                              |
| erm(35)    | 50B |       |       |      | LowEfficiency, CtIsSmall, S: |
| erm(36)    | 50B |       |       |      | CurveFitFailed               |
| ermA       | 50B |       |       |      | CurveFitFailed               |
| ermA/ermTR | 50B |       |       |      | NoAmplification              |
| ermB       | 50B | 17.79 | 75.05 | 2.11 |                              |
| ermC       | 50B |       |       |      | LowEfficiency, CtIsSmall, S: |
| ermF       | 50B |       |       |      | LowEfficiency, CtIsSmall, S: |
| ermJ/ermD  | 50B |       |       |      | LowEfficiency, CtIsSmall, S: |
| ermK-01    | 50B |       |       |      | CurveFitFailed               |
| ermK-02    | 50B | 41.1  | 86.5  | 1.69 |                              |
| ermT-01    | 50B |       |       |      | LowEfficiency, CtIsSmall, Ct |
| ermT-02    | 50B |       |       |      | LowEfficiency, CtIsSmall, S: |
| ermX       | 50B | 37.42 | 74.71 | 1.85 |                              |
| ermY       | 50B |       |       |      | LowEfficiency, CtIsSmall, S: |
| fabK       | 50B | 20.91 | 78.78 | 2.13 |                              |
| floR       | 50B |       |       |      | NoAmplification              |
| folA       | 50B |       |       |      | NoAmplification              |
| fosB       | 50B |       |       |      | LowEfficiency, CtIsSmall, S: |
| fosX       | 50B |       |       |      | LowEfficiency, CtIsSmall, S: |
| fox5       | 50B | 33.53 | 85.77 | 1.92 |                              |
| imiR       | 50B |       |       |      | CurveFitFailed               |
| ImrA-01    | 50B |       |       |      | NoAmplification              |
| intl       | 50B | 38.26 | 84.74 | 1.75 | MultipleMeltPeaks            |
| intl1      | 50B | 22.29 | 87    | 2.03 | MultipleMeltPeaks            |
| IS613      | 50B | 24.56 | 79.58 | 2.05 |                              |
| lnuA-01    | 50B |       |       |      | LowEfficiency, CtIsSmall, S: |
| lnuB-01    | 50B |       |       |      | LowEfficiency, CtIsSmall, S: |
| lnuB-02    | 50B |       |       |      | LowEfficiency, CtIsSmall, S: |

|               |     |       |       |      |                              |
|---------------|-----|-------|-------|------|------------------------------|
| lnuC          | 50B |       |       |      | CurveFitFailed               |
| marR-01       | 50B | 36.96 | 85.43 | 1.73 | MultipleMeltPeaks            |
| matA/mel      | 50B | 17.34 | 77.65 | 2.06 |                              |
| mdet1         | 50B |       |       |      | LowEfficiency, CtIsSmall, S: |
| mdtA          | 50B | 32.74 | 79.15 | 1.64 |                              |
| mdtE/yhiU     | 50B | 33.38 | 90.61 | 1.88 |                              |
| mecA          | 50B |       |       |      | LowEfficiency, CtIsSmall, S: |
| mefA          | 50B | 16.63 | 80.47 | 1.99 |                              |
| mepA          | 50B | 32.89 | 83.03 | 2.02 |                              |
| mexA          | 50B |       |       |      | CurveFitFailed               |
| mexD          | 50B | 38.67 | 79.58 | 1.87 |                              |
| mexE          | 50B | 30.48 | 88.38 | 1.92 |                              |
| mexF          | 50B | 27.89 | 81.48 | 1.71 | MultipleMeltPeaks            |
| mphA-01       | 50B | 29.29 | 91.14 | 1.98 |                              |
| mphA-02       | 50B | 31.74 | 89.73 | 1.41 | MultipleMeltPeaks            |
| mphB          | 50B | 31.91 | 77.84 | 2.06 |                              |
| mphC          | 50B |       |       |      | CurveFitFailed               |
| msrA-01       | 50B | 34.95 | 72.59 | 2.04 |                              |
| msrC-01       | 50B |       |       |      | NoAmplification              |
| mtrC-01       | 50B |       |       |      | NoAmplification              |
| mtrC-02       | 50B | 35    | 84.24 | 1.99 |                              |
| mtrD-02       | 50B | 28.67 | 83.05 | 1.99 |                              |
| mtrD-03       | 50B | 31.8  | 81.99 | 1.84 |                              |
| NDM1          | 50B |       |       |      | LowEfficiency, CtIsSmall, S: |
| nimE          | 50B |       |       |      | LowEfficiency, CtIsSmall, C: |
| nisB          | 50B |       |       |      | NoAmplification              |
| oleC          | 50B | 35.65 | 89.48 | 1.84 |                              |
| oprD          | 50B | 29.75 | 89.48 | 1.93 |                              |
| oprJ          | 50B | 29.42 | 91.42 | 1.97 |                              |
| pbp           | 50B |       |       |      | LowEfficiency, CtIsSmall, S: |
| pbp2x         | 50B |       |       |      | NoAmplification              |
| Pbp5          | 50B |       |       |      | LowEfficiency, CtIsSmall, S: |
| penA          | 50B | 37.73 | 84.45 | 1.69 | MultipleMeltPeaks            |
| pikR1         | 50B | 36.23 | 74.71 | 2.11 |                              |
| pikR2         | 50B | 33.86 | 90.13 | 1.97 | MultipleMeltPeaks            |
| pmrA          | 50B | 19.28 | 79.79 | 2.07 |                              |
| pncA          | 50B | 33    | 87.87 | 1.47 | MultipleMeltPeaks            |
| putative mult | 50B | 37.39 | 77.25 | 1.86 | MultipleMeltPeaks            |
| qac           | 50B | 29.02 | 73.85 | 2.05 |                              |
| qacA          | 50B | 34.41 | 70.31 | 1.72 |                              |
| qacA/qacB     | 50B |       |       |      | NoAmplification              |
| qacEdelta1-0  | 50B |       |       |      | LowEfficiency, CtIsSmall, S: |
| qacEdelta1-0  | 50B | 29.35 | 80.84 | 1.97 | MultipleMeltPeaks            |
| qacH-01       | 50B | 35.83 | 83.31 | 1.93 |                              |
| qacH-02       | 50B |       |       |      | CurveFitFailed               |
| qnrA          | 50B |       |       |      | CurveFitFailed               |

|              |     |       |       |      |                              |
|--------------|-----|-------|-------|------|------------------------------|
| rarD-02      | 50B |       |       |      | NoAmplification              |
| sat4         | 50B |       |       |      | LowEfficiency, CtIsSmall, S: |
| sdeB         | 50B |       |       |      | CurveFitFailed               |
| spcN-01      | 50B |       |       |      | LowEfficiency, CtIsSmall, S: |
| speA         | 50B |       |       |      | NoAmplification              |
| str          | 50B |       |       |      | LowEfficiency, CtIsSmall, S: |
| strA         | 50B |       |       |      | CurveFitFailed               |
| strB         | 50B | 19.96 | 84.24 | 1.95 |                              |
| sul1         | 50B |       |       |      | NoAmplification              |
| sul2         | 50B | 31.24 | 74.41 | 1.66 | MultipleMeltPeaks            |
| sulA/foIP-01 | 50B | 16.68 | 81.58 | 2.01 |                              |
| sulA/foIP-03 | 50B | 17.58 | 84.24 | 1.97 |                              |
| tet(32)      | 50B |       |       |      | CurveFitFailed               |
| tet(34)      | 50B | 32.05 | 75.48 | 2.01 |                              |
| tet(35)      | 50B |       |       |      | NoAmplification              |
| tet(36)-A    | 50B | 41.98 | 81.89 | 1.67 |                              |
| tet(36)-B    | 50B |       |       |      | LowEfficiency, CtIsSmall, S: |
| tet(37)      | 50B | 24.9  | 75.9  | 1.99 |                              |
| tetA-01      | 50B | 31.75 | 85.04 | 1.95 |                              |
| tetA-02      | 50B | 31.25 | 87.66 | 1.91 |                              |
| tetB-01      | 50B |       |       |      | CurveFitFailed               |
| tetB-02      | 50B | 41.9  | 77.57 | 1.72 | MultipleMeltPeaks            |
| tetC-01      | 50B |       |       |      | NoAmplification              |
| tetC-02      | 50B |       |       |      | LowEfficiency, CtIsSmall, C: |
| tetD-01      | 50B |       |       |      | CurveFitFailed               |
| tetD-02      | 50B | 28.32 | 78.28 | 1.97 |                              |
| tetE         | 50B |       |       |      | LowEfficiency, CtIsSmall, S: |
| tetG-01      | 50B | 35.65 | 90.81 | 1.84 |                              |
| tetG-02      | 50B | 30.65 | 86.1  | 1.9  |                              |
| tetH         | 50B |       |       |      | NoAmplification              |
| tetJ         | 50B |       |       |      | LowEfficiency, CtIsSmall, S: |
| tetK         | 50B |       |       |      | CurveFitFailed               |
| tetL-01      | 50B |       |       |      | LowEfficiency, CtIsSmall, S: |
| tetL-02      | 50B | 35.32 | 83.31 | 1.91 |                              |
| tetM-01      | 50B | 16.76 | 76.23 | 2    |                              |
| tetM-02      | 50B | 17.07 | 77.92 | 2.05 |                              |
| tetO-01      | 50B |       |       |      | LowEfficiency, CtIsSmall, S: |
| tetPA        | 50B |       |       |      | NoAmplification              |
| tetPB-01     | 50B |       |       |      | NoAmplification              |
| tetPB-02     | 50B | 28.85 | 84.07 | 2.07 |                              |
| tetPB-03     | 50B |       |       |      | LowEfficiency, CtIsSmall, S: |
| tetPB-05     | 50B | 40.95 | 73.54 | 1.68 |                              |
| tetQ         | 50B | 21.41 | 77.42 | 2.04 |                              |
| tetR-02      | 50B | 30.23 | 85.5  | 1.88 | MultipleMeltPeaks            |
| tetR-03      | 50B |       |       |      | CurveFitFailed               |
| tetS         | 50B |       |       |      | LowEfficiency, CtIsSmall, S: |

|             |     |       |       |      |                              |
|-------------|-----|-------|-------|------|------------------------------|
| tetT        | 50B | 34.05 | 78.75 | 1.93 |                              |
| tetU-01     | 50B |       |       |      | LowEfficiency, CtIsSmall, S: |
| tetV        | 50B |       |       |      | BadR2, LowEfficiency, CtIsS  |
| tetW-01     | 50B |       |       |      | LowEfficiency, CtIsSmall, S: |
| tetX        | 50B |       |       |      | LowEfficiency, CtIsSmall, S: |
| tnpA-01     | 50B | 27.51 | 85.93 | 1.94 |                              |
| tnpA-02     | 50B | 20.73 | 85.15 | 1.81 |                              |
| tnpA-03     | 50B |       |       |      | LowEfficiency, CtIsSmall, S: |
| tnpA-04     | 50B |       |       |      | CurveFitFailed               |
| tnpA-05     | 50B | 27.93 | 80.81 | 1.93 |                              |
| tnpA-07     | 50B |       |       |      | CurveFitFailed               |
| tolC-01     | 50B |       |       |      | LowEfficiency, CtIsSmall, S: |
| tolC-02     | 50B | 31.09 | 85.19 | 1.97 |                              |
| tolC-03     | 50B | 33.75 | 89.55 | 1.94 | MultipleMeltPeaks            |
| Tp614       | 50B | 37.48 | 82.41 | 1.86 | MultipleMeltPeaks            |
| ttgA        | 50B |       |       |      | LowEfficiency, CtIsSmall, S: |
| ttgB        | 50B |       |       |      | CurveFitFailed               |
| vanA        | 50B |       |       |      | NoAmplification              |
| vanB-01     | 50B | 32.96 | 89.54 | 1.85 |                              |
| vanC-01     | 50B |       |       |      | CurveFitFailed               |
| vanC-02     | 50B | 37.69 | 90.65 | 1.72 | MultipleMeltPeaks            |
| vanC-03     | 50B | 28.75 | 85.61 | 2    | MultipleMeltPeaks            |
| vanC1       | 50B |       |       |      | LowEfficiency, CtIsSmall, S: |
| vanC2/vanC3 | 50B | 33.14 | 81.96 | 2.08 |                              |
| vanG        | 50B |       |       |      | CurveFitFailed               |
| vanHB       | 50B |       |       |      | CurveFitFailed               |
| vanHD       | 50B |       |       |      | CurveFitFailed               |
| vanRA-01    | 50B |       |       |      | CurveFitFailed               |
| vanRA-02    | 50B |       |       |      | NoAmplification              |
| vanRB       | 50B |       |       |      | NoAmplification              |
| vanRC       | 50B |       |       |      | LowEfficiency, CtIsSmall, S: |
| vanRC4      | 50B |       |       |      | CurveFitFailed               |
| vanRD       | 50B |       |       |      | CurveFitFailed               |
| vanSA       | 50B |       |       |      | LowEfficiency, CtIsSmall, C: |
| vanSB       | 50B | 30.39 | 74.43 | 1.99 |                              |
| vanSC-01    | 50B |       |       |      | CurveFitFailed               |
| vanSC-02    | 50B |       |       |      | NoAmplification              |
| vanTC-01    | 50B |       |       |      | LowEfficiency, CtIsSmall, S: |
| vanTC-02    | 50B | 37.7  | 86.37 | 1.74 | MultipleMeltPeaks            |
| vanTE       | 50B |       |       |      | NoAmplification              |
| vanTG       | 50B |       |       |      | NoAmplification              |
| vanWB       | 50B |       |       |      | LowEfficiency, CtIsSmall, S: |
| vanWG       | 50B |       |       |      | LowEfficiency, CtIsSmall, S: |
| vanXA       | 50B |       |       |      | CurveFitFailed               |
| vanXB       | 50B |       |       |      | NoAmplification              |
| vanXD       | 50B | 30.06 | 75.38 | 2.02 |                              |

|              |     |       |       |      |                              |
|--------------|-----|-------|-------|------|------------------------------|
| vanYB        | 50B |       |       |      | LowEfficiency, CtIsSmall, S: |
| vanYD-01     | 50B | 33.56 | 88.92 | 1.91 | MultipleMeltPeaks            |
| vanYD-02     | 50B |       |       |      | LowEfficiency, CtIsSmall, S: |
| vatB-01      | 50B |       |       |      | LowEfficiency, CtIsSmall, S: |
| vatB-02      | 50B |       |       |      | LowEfficiency, CtIsSmall, S: |
| vatC-01      | 50B |       |       |      | CurveFitFailed               |
| vatC-02      | 50B | 35.9  | 87.61 | 1.81 |                              |
| vatE-01      | 50B | 32.3  | 75.48 | 2.09 |                              |
| vatE-02      | 50B |       |       |      | NoAmplification              |
| vgaA-01      | 50B |       |       |      | LowEfficiency, CtIsSmall, S: |
| vgaA-02      | 50B |       |       |      | CurveFitFailed               |
| vgb-01       | 50B |       |       |      | CurveFitFailed               |
| vgbB-01      | 50B |       |       |      | CurveFitFailed               |
| vgbB-02      | 50B |       |       |      | CurveFitFailed               |
| yceE/mdtG-0  | 50B |       |       |      | LowEfficiency, CtIsSmall, S: |
| yceE/mdtG-0  | 50B |       |       |      | NoAmplification              |
| yceL/mdtH-0  | 50B | 34.77 | 83.08 | 1.86 | MultipleMeltPeaks            |
| yceL/mdtH-0  | 50B |       |       |      | CurveFitFailed               |
| yceL/mdtH-0  | 50B | 37.19 | 77.51 | 1.75 | MultipleMeltPeaks            |
| yidY/mdtL-01 | 50B |       |       |      | CurveFitFailed               |
| yidY/mdtL-02 | 50B |       |       |      | CurveFitFailed               |































| Assay          | Sample | Ct | Tm    | Efficiency | flag                         |
|----------------|--------|----|-------|------------|------------------------------|
| 16S rRNA       | 50C    |    | 12.36 | 81.97      | 2                            |
| aac            | 50C    |    | 32.24 | 80.91      | 1.74 MultipleMeltPeaks       |
| aac(6')-Ib(akz | 50C    |    |       |            | LowEfficiency, CtIsSmall, Ci |
| aac(6')-Ib(akz | 50C    |    | 30.01 | 86.24      | 1.98                         |
| aac(6')-Ib(akz | 50C    |    | 33.27 | 78.06      | 2.03                         |
| aac(6')-II     | 50C    |    |       |            | CurveFitFailed               |
| aac(6')I1      | 50C    |    | 34.1  | 91.52      | 1.9 MultipleMeltPeaks        |
| aacA/aphD      | 50C    |    |       |            | LowEfficiency, CtIsSmall, Ci |
| aacC           | 50C    |    | 28.07 | 88.86      | 1.81                         |
| aacC1          | 50C    |    |       |            | NoAmplification              |
| aacC2          | 50C    |    |       |            | NoAmplification              |
| aacC4          | 50C    |    | 31.31 | 91.81      | 1.85 MultipleMeltPeaks       |
| aadA-01        | 50C    |    |       |            | CurveFitFailed               |
| aadA-02        | 50C    |    |       |            | LowEfficiency, CtIsSmall, S: |
| aadA-1-01      | 50C    |    | 33.73 | 81.61      | 1.95                         |
| aadA-1-02      | 50C    |    |       |            | CurveFitFailed               |
| aadA1          | 50C    |    | 30.73 | 83.46      | 2.04                         |
| aadA2-01       | 50C    |    |       |            | CurveFitFailed               |
| aadA2-02       | 50C    |    | 32.33 | 75.2       | 1.91                         |
| aadA2-03       | 50C    |    |       |            | LowEfficiency, CtIsSmall, S: |
| aadA5-01       | 50C    |    |       |            | CurveFitFailed               |
| aadA5-02       | 50C    |    | 31.27 | 78.13      | 1.94                         |
| aadA9-01       | 50C    |    | 35.29 | 87.18      | 1.86 MultipleMeltPeaks       |
| aadA9-02       | 50C    |    |       |            | LowEfficiency, CtIsSmall, S: |
| aadD           | 50C    |    |       |            | LowEfficiency, CtIsSmall, Ci |
| aadE           | 50C    |    |       |            | LowEfficiency, CtIsSmall, Ci |
| acrA-01        | 50C    |    | 30.07 | 84.5       | 1.91 MultipleMeltPeaks       |
| acrA-02        | 50C    |    |       |            | CurveFitFailed               |
| acrA-03        | 50C    |    | 37.82 | 90.2       | 1.67 MultipleMeltPeaks       |
| acrA-04        | 50C    |    | 34.11 | 79.97      | 1.92 MultipleMeltPeaks       |
| acrA-05        | 50C    |    | 28.15 | 90.68      | 1.98                         |
| acrB-01        | 50C    |    | 35.58 | 91.59      | 1.89                         |
| acrF           | 50C    |    | 34.36 | 79.2       | 2.06                         |
| acrR-01        | 50C    |    | 33.44 | 84.46      | 1.95                         |
| acrR-02        | 50C    |    | 37.13 | 84.77      | 1.8 MultipleMeltPeaks        |
| Actin          | 50C    |    | 20.96 | 87.18      | 1.95                         |
| adeA           | 50C    |    | 32.15 | 85.74      | 1.93                         |
| ampC-01        | 50C    |    | 29.11 | 80.61      | 1.87 MultipleMeltPeaks       |
| ampC-02        | 50C    |    | 35.34 | 89.89      | 1.91                         |
| ampC-04        | 50C    |    | 33.37 | 78.27      | 1.89                         |
| ampC-05        | 50C    |    |       |            | CurveFitFailed               |
| ampC-06        | 50C    |    |       |            | CurveFitFailed               |
| ampC-07        | 50C    |    | 34.6  | 83.98      | 1.92                         |
| ampC-09        | 50C    |    |       |            | CurveFitFailed               |
| ampC/blaDH     | 50C    |    | 30.91 | 84.84      | 1.97                         |

|                            |     |       |       |      |                              |
|----------------------------|-----|-------|-------|------|------------------------------|
| aph                        | 50C |       |       |      | CurveFitFailed               |
| aph(2')-Id-01              | 50C |       |       |      | LowEfficiency, CtIsSmall, Ci |
| aph(2')-Id-02              | 50C |       |       |      | LowEfficiency, CtIsSmall, Ci |
| aph6ia                     | 50C | 27.52 | 78.04 | 1.98 |                              |
| aphA1(aka k <sub>a</sub> ) | 50C | 27.74 | 76.37 | 2.07 |                              |
| bacA-01                    | 50C |       |       |      | LowEfficiency, CtIsSmall, Ci |
| bacA-02                    | 50C | 36.7  | 88.95 | 1.78 | MultipleMeltPeaks            |
| BETA-globin                | 50C | 21.75 | 84.27 | 2    |                              |
| bla-ACC-1                  | 50C | 34.37 | 87    | 1.9  |                              |
| bla-L1                     | 50C | 30.72 | 85    | 1.95 |                              |
| bla1                       | 50C |       |       |      | LowEfficiency, CtIsSmall, Ci |
| blaCMY                     | 50C | 31.68 | 80.81 | 1.87 |                              |
| blaCMY2-01                 | 50C |       |       |      | NoAmplification              |
| blaCMY2-02                 | 50C | 31.39 | 85.26 | 1.93 | MultipleMeltPeaks            |
| blaCTX-M-01                | 50C | 38.28 | 80.12 | 1.82 | MultipleMeltPeaks            |
| blaCTX-M-02                | 50C | 36.36 | 89.71 | 1.79 |                              |
| blaCTX-M-03                | 50C |       |       |      | LowEfficiency, CtIsSmall, Ci |
| blaCTX-M-04                | 50C | 34.35 | 86.79 | 1.91 |                              |
| blaCTX-M-05                | 50C | 32.11 | 76.52 | 1.79 |                              |
| blaCTX-M-06                | 50C |       |       |      | NoAmplification              |
| blaGES                     | 50C |       |       |      | NoAmplification              |
| blaIMP-01                  | 50C | 36.46 | 76.43 | 1.91 |                              |
| blaIMP-02                  | 50C |       |       |      | CurveFitFailed               |
| blaMOX/blaC                | 50C |       |       |      | NoAmplification              |
| blaOCH                     | 50C |       |       |      | NoAmplification              |
| blaOKP                     | 50C |       |       |      | NoAmplification              |
| blaOXA1/blaC               | 50C |       |       |      | CurveFitFailed               |
| blaOXA10-01                | 50C |       |       |      | LowEfficiency, CtIsSmall, Ci |
| blaOXA10-02                | 50C |       |       |      | CurveFitFailed               |
| blaOXY                     | 50C |       |       |      | LowEfficiency, CtIsSmall, Ci |
| blaPAO                     | 50C |       |       |      | NoAmplification              |
| blaPER                     | 50C |       |       |      | LowEfficiency, CtIsSmall, Ci |
| blaPSE                     | 50C |       |       |      | NoAmplification              |
| blaROB                     | 50C |       |       |      | NoAmplification              |
| blaSFO                     | 50C | 29.74 | 88.68 | 1.84 |                              |
| blaSHV-01                  | 50C |       |       |      | NoAmplification              |
| blaSHV-02                  | 50C |       |       |      | CurveFitFailed               |
| blaTEM                     | 50C | 16.9  | 79.47 | 1.64 |                              |
| blaTLA                     | 50C |       |       |      | LowEfficiency, CtIsSmall, Ci |
| blaVEB                     | 50C |       |       |      | NoAmplification              |
| blaVIM                     | 50C | 35.94 | 89.12 | 1.9  |                              |
| blaZ                       | 50C |       |       |      | LowEfficiency, CtIsSmall, Ci |
| carB                       | 50C |       |       |      | LowEfficiency, CtIsSmall, S: |
| catA1                      | 50C |       |       |      | NoAmplification              |
| catB3                      | 50C | 40.08 | 79.95 | 1.64 | MultipleMeltPeaks            |
| catB8                      | 50C | 31.59 | 82.34 | 1.92 |                              |

|            |     |       |       |      |                              |
|------------|-----|-------|-------|------|------------------------------|
| ceoA       | 50C | 27.95 | 92.4  | 1.97 |                              |
| cepA       | 50C | 37.77 | 80.02 | 1.86 |                              |
| cfiA       | 50C | 32.76 | 86.65 | 1.8  |                              |
| cfr        | 50C |       |       |      | CurveFitFailed               |
| cfxA       | 50C | 19.53 | 77.65 | 1.91 |                              |
| cmeA       | 50C | 36.14 | 78.23 | 1.8  |                              |
| cmlA1-01   | 50C |       |       |      | LowEfficiency, CtIsSmall, S: |
| cmlA1-02   | 50C | 32.55 | 88.39 | 1.97 |                              |
| cmr        | 50C |       |       |      | LowEfficiency, CtIsSmall, S: |
| cmx(A)     | 50C | 33.07 | 87.18 | 1.82 |                              |
| cphA-01    | 50C | 29.04 | 86.52 | 1.76 |                              |
| cphA-02    | 50C | 35.65 | 77.8  | 1.98 | MultipleMeltPeaks            |
| dfrA1      | 50C |       |       |      | NoAmplification              |
| dfrA12     | 50C |       |       |      | LowEfficiency, CtIsSmall, S: |
| emrD       | 50C |       |       |      | BadR2, LowEfficiency, CtIsS  |
| ereA       | 50C |       |       |      | BadR2, LowEfficiency, CtIsS  |
| ereB       | 50C |       |       |      | CurveFitFailed               |
| erm(34)    | 50C | 39.02 | 87.07 | 1.74 | MultipleMeltPeaks            |
| erm(35)    | 50C |       |       |      | CurveFitFailed               |
| erm(36)    | 50C | 30.93 | 85.75 | 1.68 |                              |
| ermA       | 50C |       |       |      | LowEfficiency, CtIsSmall, Ci |
| ermA/ermTR | 50C |       |       |      | NoAmplification              |
| ermB       | 50C | 18.2  | 74.93 | 2.15 |                              |
| ermC       | 50C | 29.66 | 75.36 | 1.95 |                              |
| ermF       | 50C |       |       |      | LowEfficiency, CtIsSmall, S: |
| ermJ/ermD  | 50C |       |       |      | LowEfficiency, CtIsSmall, Ci |
| ermK-01    | 50C | 35.35 | 74.03 | 2.02 |                              |
| ermK-02    | 50C |       |       |      | CurveFitFailed               |
| ermT-01    | 50C |       |       |      | CurveFitFailed               |
| ermT-02    | 50C |       |       |      | LowEfficiency, CtIsSmall, S: |
| ermX       | 50C |       |       |      | LowEfficiency, CtIsSmall, S: |
| ermY       | 50C |       |       |      | LowEfficiency, CtIsSmall, Ci |
| fabK       | 50C | 22.4  | 78.77 | 2.15 |                              |
| floR       | 50C | 36.32 | 89    | 1.81 | MultipleMeltPeaks            |
| folA       | 50C |       |       |      | NoAmplification              |
| fosB       | 50C |       |       |      | LowEfficiency, CtIsSmall, S: |
| fosX       | 50C |       |       |      | CurveFitFailed               |
| fox5       | 50C | 29.84 | 86.28 | 1.71 |                              |
| imiR       | 50C |       |       |      | CurveFitFailed               |
| ImrA-01    | 50C |       |       |      | LowEfficiency, CtIsSmall, Ci |
| intl       | 50C | 31.72 | 87.15 | 1.87 | MultipleMeltPeaks            |
| intl1      | 50C | 21.23 | 87.34 | 2    |                              |
| IS613      | 50C | 20.38 | 79.6  | 2.02 |                              |
| lnuA-01    | 50C |       |       |      | LowEfficiency, CtIsSmall, Ci |
| lnuB-01    | 50C |       |       |      | LowEfficiency, CtIsSmall, Ci |
| lnuB-02    | 50C |       |       |      | LowEfficiency, CtIsSmall, Ci |

|               |     |       |       |      |                              |
|---------------|-----|-------|-------|------|------------------------------|
| lnuC          | 50C | 34.27 | 89.9  | 1.81 | MultipleMeltPeaks            |
| marR-01       | 50C | 30.78 | 85.48 | 1.91 |                              |
| matA/mel      | 50C | 16.01 | 77.55 | 2.15 |                              |
| mdet1         | 50C |       |       |      | LowEfficiency, CtIsSmall, Ci |
| mdtA          | 50C |       |       |      | CurveFitFailed               |
| mdtE/yhiU     | 50C | 30.79 | 92    | 1.96 |                              |
| mecA          | 50C |       |       |      | LowEfficiency, CtIsSmall, Ci |
| mefA          | 50C | 15.39 | 80.48 | 2.08 |                              |
| mepA          | 50C | 33.55 | 90.42 | 2.01 |                              |
| mexA          | 50C |       |       |      | CurveFitFailed               |
| mexD          | 50C | 34.06 | 79.92 | 2.08 |                              |
| mexE          | 50C | 30.86 | 89.08 | 1.94 |                              |
| mexF          | 50C | 27.71 | 83.71 | 1.67 | MultipleMeltPeaks            |
| mphA-01       | 50C | 27.1  | 91.17 | 1.96 |                              |
| mphA-02       | 50C | 27.92 | 89.6  | 1.63 |                              |
| mphB          | 50C |       |       |      | CurveFitFailed               |
| mphC          | 50C |       |       |      | LowEfficiency, CtIsSmall, Ci |
| msrA-01       | 50C | 31.04 | 76.36 | 2.01 |                              |
| msrC-01       | 50C |       |       |      | NoAmplification              |
| mtrC-01       | 50C | 36.94 | 83.16 | 1.79 |                              |
| mtrC-02       | 50C | 38.62 | 84.31 | 1.78 |                              |
| mtrD-02       | 50C | 27.45 | 83.82 | 1.99 | MultipleMeltPeaks            |
| mtrD-03       | 50C | 29.17 | 81.93 | 1.82 |                              |
| NDM1          | 50C |       |       |      | NoAmplification              |
| nimE          | 50C |       |       |      | LowEfficiency, CtIsSmall, Ci |
| nisB          | 50C | 37.73 | 86.67 | 1.8  |                              |
| oleC          | 50C | 36.12 | 90.68 | 1.84 | MultipleMeltPeaks            |
| oprD          | 50C | 27.01 | 89.63 | 1.96 |                              |
| oprJ          | 50C | 29.49 | 91.43 | 1.85 |                              |
| pbp           | 50C |       |       |      | CurveFitFailed               |
| pbp2x         | 50C |       |       |      | LowEfficiency, CtIsSmall, Ci |
| Pbp5          | 50C |       |       |      | LowEfficiency, CtIsSmall, S  |
| penA          | 50C | 36.91 | 84.7  | 1.71 |                              |
| pikR1         | 50C | 32.44 | 86.54 | 1.75 | MultipleMeltPeaks            |
| pikR2         | 50C | 31.28 | 81.43 | 1.75 |                              |
| pmrA          | 50C | 20.98 | 79.8  | 2.08 |                              |
| pncA          | 50C | 31    | 87.9  | 1.75 |                              |
| putative mult | 50C |       |       |      | CurveFitFailed               |
| qac           | 50C |       |       |      | CurveFitFailed               |
| qacA          | 50C |       |       |      | CurveFitFailed               |
| qacA/qacB     | 50C |       |       |      | NoAmplification              |
| qacEdelta1-0  | 50C |       |       |      | LowEfficiency, CtIsSmall, Ci |
| qacEdelta1-0  | 50C | 30.7  | 86.11 | 1.94 |                              |
| qacH-01       | 50C | 37.32 | 80.67 | 1.83 | MultipleMeltPeaks            |
| qacH-02       | 50C | 34.32 | 87.53 | 1.95 |                              |
| qnrA          | 50C | 37.91 | 77.21 | 1.83 |                              |



|              |     |       |       |      |                              |
|--------------|-----|-------|-------|------|------------------------------|
| rarD-02      | 50C | 37.04 | 81.84 | 1.88 |                              |
| sat4         | 50C |       |       |      | CurveFitFailed               |
| sdeB         | 50C |       |       |      | LowEfficiency, CtIsSmall, S: |
| spcN-01      | 50C |       |       |      | CurveFitFailed               |
| speA         | 50C |       |       |      | NoAmplification              |
| str          | 50C |       |       |      | LowEfficiency, CtIsSmall, Ci |
| strA         | 50C |       |       |      | CurveFitFailed               |
| strB         | 50C | 16.6  | 84.29 | 1.96 |                              |
| sul1         | 50C |       |       |      | NoAmplification              |
| sul2         | 50C | 24.85 | 85.58 | 1.31 | MultipleMeltPeaks            |
| sulA/foIP-01 | 50C | 17.76 | 81.55 | 2.02 |                              |
| sulA/foIP-03 | 50C | 18.44 | 84.1  | 1.96 |                              |
| tet(32)      | 50C |       |       |      | LowEfficiency, CtIsSmall, Ci |
| tet(34)      | 50C | 30.61 | 75.68 | 1.96 |                              |
| tet(35)      | 50C |       |       |      | NoAmplification              |
| tet(36)-A    | 50C |       |       |      | LowEfficiency, CtIsSmall, S: |
| tet(36)-B    | 50C |       |       |      | LowEfficiency, CtIsSmall, Ci |
| tet(37)      | 50C | 21.35 | 75.92 | 2.01 |                              |
| tetA-01      | 50C | 29.88 | 85.09 | 1.9  |                              |
| tetA-02      | 50C | 30.23 | 87.8  | 1.92 |                              |
| tetB-01      | 50C |       |       |      | CurveFitFailed               |
| tetB-02      | 50C | 35.35 | 89.48 | 1.74 | MultipleMeltPeaks            |
| tetC-01      | 50C |       |       |      | NoAmplification              |
| tetC-02      | 50C |       |       |      | LowEfficiency, CtIsSmall, Ci |
| tetD-01      | 50C |       |       |      | LowEfficiency, CtIsSmall, Ci |
| tetD-02      | 50C | 32.85 | 77.09 | 1.98 | MultipleMeltPeaks            |
| tetE         | 50C |       |       |      | CurveFitFailed               |
| tetG-01      | 50C | 31.11 | 84.98 | 2.01 | MultipleMeltPeaks            |
| tetG-02      | 50C | 31.17 | 86.09 | 1.81 |                              |
| tetH         | 50C |       |       |      | LowEfficiency, CtIsSmall, Ci |
| tetJ         | 50C |       |       |      | LowEfficiency, CtIsSmall, Ci |
| tetK         | 50C |       |       |      | LowEfficiency, CtIsSmall, Ci |
| tetL-01      | 50C |       |       |      | LowEfficiency, CtIsSmall, Ci |
| tetL-02      | 50C | 31.1  | 84.97 | 1.91 |                              |
| tetM-01      | 50C | 15.24 | 76.02 | 2.14 |                              |
| tetM-02      | 50C | 15.26 | 77.76 | 2.18 |                              |
| tetO-01      | 50C |       |       |      | CurveFitFailed               |
| tetPA        | 50C |       |       |      | LowEfficiency, CtIsSmall, Ci |
| tetPB-01     | 50C | 37.67 | 83.96 | 1.88 | MultipleMeltPeaks            |
| tetPB-02     | 50C | 27.05 | 84.17 | 2.06 |                              |
| tetPB-03     | 50C |       |       |      | LowEfficiency, CtIsSmall, S: |
| tetPB-05     | 50C | 36.08 | 73.01 | 2.04 |                              |
| tetQ         | 50C | 20.45 | 77.41 | 2.06 |                              |
| tetR-02      | 50C | 28.6  | 88.12 | 1.86 | MultipleMeltPeaks            |
| tetR-03      | 50C |       |       |      | CurveFitFailed               |
| tetS         | 50C | 28.89 | 88.52 | 2.22 | MultipleMeltPeaks            |

|             |     |       |       |      |                              |
|-------------|-----|-------|-------|------|------------------------------|
| tetT        | 50C |       |       |      | LowEfficiency, CtIsSmall, S: |
| tetU-01     | 50C |       |       |      | CurveFitFailed               |
| tetV        | 50C |       |       |      | LowEfficiency, CtIsSmall, S: |
| tetW-01     | 50C |       |       |      | CurveFitFailed               |
| tetX        | 50C |       |       |      | CurveFitFailed               |
| tnpA-01     | 50C | 29.6  | 85.82 | 1.9  |                              |
| tnpA-02     | 50C | 17.19 | 85.23 | 1.78 |                              |
| tnpA-03     | 50C | 29.35 | 77.67 | 1.83 |                              |
| tnpA-04     | 50C | 29.44 | 82.33 | 1.88 |                              |
| tnpA-05     | 50C |       |       |      | LowEfficiency, CtIsSmall, Ci |
| tnpA-07     | 50C |       |       |      | LowEfficiency, CtIsSmall, Ci |
| tolC-01     | 50C |       |       |      | CurveFitFailed               |
| tolC-02     | 50C | 30.64 | 84.72 | 1.98 | MultipleMeltPeaks            |
| tolC-03     | 50C | 33.62 | 88.26 | 2    |                              |
| Tp614       | 50C |       |       |      | LowEfficiency, CtIsSmall, Ci |
| ttgA        | 50C | 32.64 | 80.47 | 1.95 | MultipleMeltPeaks            |
| ttgB        | 50C |       |       |      | CurveFitFailed               |
| vanA        | 50C |       |       |      | NoAmplification              |
| vanB-01     | 50C | 33.75 | 78.83 | 1.92 | MultipleMeltPeaks            |
| vanC-01     | 50C |       |       |      | LowEfficiency, CtIsSmall, Ci |
| vanC-02     | 50C | 35.4  | 90.77 | 1.84 |                              |
| vanC-03     | 50C | 26.48 | 91.53 | 2    |                              |
| vanC1       | 50C | 36.61 | 79.46 | 1.86 |                              |
| vanC2/vanC3 | 50C | 34.55 | 82.86 | 2.06 | MultipleMeltPeaks            |
| vanG        | 50C |       |       |      | LowEfficiency, CtIsSmall, S: |
| vanHB       | 50C | 31.79 | 84.96 | 1.88 | MultipleMeltPeaks            |
| vanHD       | 50C | 36.56 | 89.89 | 1.78 |                              |
| vanRA-01    | 50C |       |       |      | CurveFitFailed               |
| vanRA-02    | 50C |       |       |      | LowEfficiency, CtIsSmall, Ci |
| vanRB       | 50C | 36.16 | 87.05 | 1.83 |                              |
| vanRC       | 50C |       |       |      | LowEfficiency, CtIsSmall, Ci |
| vanRC4      | 50C |       |       |      | LowEfficiency, CtIsSmall, Ci |
| vanRD       | 50C |       |       |      | LowEfficiency, CtIsSmall, Ci |
| vanSA       | 50C |       |       |      | LowEfficiency, CtIsSmall, S: |
| vanSB       | 50C | 36.82 | 73.06 | 1.87 |                              |
| vanSC-01    | 50C | 35.86 | 78.02 | 2.01 | MultipleMeltPeaks            |
| vanSC-02    | 50C |       |       |      | NoAmplification              |
| vanTC-01    | 50C |       |       |      | NoAmplification              |
| vanTC-02    | 50C |       |       |      | CurveFitFailed               |
| vanTE       | 50C |       |       |      | LowEfficiency, CtIsSmall, S: |
| vanTG       | 50C |       |       |      | CurveFitFailed               |
| vanWB       | 50C |       |       |      | LowEfficiency, CtIsSmall, Ci |
| vanWG       | 50C | 35.26 | 74.07 | 1.96 |                              |
| vanXA       | 50C |       |       |      | LowEfficiency, CtIsSmall, S: |
| vanXB       | 50C |       |       |      | NoAmplification              |
| vanXD       | 50C | 33.4  | 74.78 | 2.05 |                              |

|              |     |       |       |      |                              |
|--------------|-----|-------|-------|------|------------------------------|
| vanYB        | 50C |       |       |      | LowEfficiency, CtIsSmall, Ci |
| vanYD-01     | 50C | 30.62 | 88.88 | 1.83 | MultipleMeltPeaks            |
| vanYD-02     | 50C |       |       |      | CurveFitFailed               |
| vatB-01      | 50C |       |       |      | LowEfficiency, CtIsSmall, Ci |
| vatB-02      | 50C |       |       |      | LowEfficiency, CtIsSmall, Ci |
| vatC-01      | 50C | 36.58 | 81.24 | 1.87 |                              |
| vatC-02      | 50C |       |       |      | CurveFitFailed               |
| vatE-01      | 50C | 31.49 | 75.49 | 2.03 |                              |
| vatE-02      | 50C |       |       |      | NoAmplification              |
| vgaA-01      | 50C |       |       |      | CurveFitFailed               |
| vgaA-02      | 50C |       |       |      | LowEfficiency, CtIsSmall, S: |
| vgb-01       | 50C |       |       |      | LowEfficiency, CtIsSmall, S: |
| vgbB-01      | 50C |       |       |      | LowEfficiency, CtIsSmall, S: |
| vgbB-02      | 50C |       |       |      | CurveFitFailed               |
| yceE/mdtG-0  | 50C |       |       |      | LowEfficiency, CtIsSmall, Ci |
| yceE/mdtG-0  | 50C |       |       |      | CurveFitFailed               |
| yceL/mdtH-0  | 50C | 34.21 | 84.35 | 1.85 | MultipleMeltPeaks            |
| yceL/mdtH-0  | 50C |       |       |      | LowEfficiency, CtIsSmall, Ci |
| yceL/mdtH-0  | 50C | 33.51 | 91.38 | 1.91 |                              |
| yidY/mdtL-01 | 50C | 31.35 | 90    | 1.98 | MultipleMeltPeaks            |
| yidY/mdtL-02 | 50C |       |       |      | CurveFitFailed               |































| Assay          | Sample | Ct | Tm    | Efficiency | flag                   |
|----------------|--------|----|-------|------------|------------------------|
| 16S rRNA       | 51A    |    | 18.73 | 82.32      | 2.03                   |
| aac            | 51A    |    | 32.45 | 81.89      | 1.9 MultipleMeltPeaks  |
| aac(6')-Ib(akz | 51A    |    |       |            | NoAmplification        |
| aac(6')-Ib(akz | 51A    |    | 31.31 | 81.26      | 1.94                   |
| aac(6')-Ib(akz | 51A    |    | 33.19 | 80.95      | 1.97 MultipleMeltPeaks |
| aac(6')-II     | 51A    |    | 33.13 | 84.21      | 1.88 MultipleMeltPeaks |
| aac(6')I1      | 51A    |    | 36.88 | 86.11      | 1.78                   |
| aacA/aphD      | 51A    |    |       |            | NoAmplification        |
| aacC           | 51A    |    | 32.13 | 87.86      | 1.82                   |
| aacC1          | 51A    |    |       |            | NoAmplification        |
| aacC2          | 51A    |    |       |            | NoAmplification        |
| aacC4          | 51A    |    | 29.77 | 89.51      | 1.85                   |
| aadA-01        | 51A    |    |       |            | NoAmplification        |
| aadA-02        | 51A    |    | 36.92 | 86.67      | 1.81                   |
| aadA-1-01      | 51A    |    | 36.12 | 78.34      | 1.83                   |
| aadA-1-02      | 51A    |    |       |            | NoAmplification        |
| aadA1          | 51A    |    |       |            | CurveFitFailed         |
| aadA2-01       | 51A    |    |       |            | CurveFitFailed         |
| aadA2-02       | 51A    |    | 34.36 | 74.91      | 1.98                   |
| aadA2-03       | 51A    |    |       |            | NoAmplification        |
| aadA5-01       | 51A    |    | 36.87 | 88.38      | 1.77                   |
| aadA5-02       | 51A    |    | 33.44 | 78.28      | 2.06 MultipleMeltPeaks |
| aadA9-01       | 51A    |    | 36.04 | 88.46      | 1.71                   |
| aadA9-02       | 51A    |    | 35.04 | 86.83      | 1.88                   |
| aadD           | 51A    |    |       |            | NoAmplification        |
| aadE           | 51A    |    |       |            | NoAmplification        |
| acrA-01        | 51A    |    | 35.37 | 79.29      | 1.91 MultipleMeltPeaks |
| acrA-02        | 51A    |    |       |            | CurveFitFailed         |
| acrA-03        | 51A    |    | 40.16 | 76.22      | 1.78                   |
| acrA-04        | 51A    |    | 32.01 | 80.31      | 1.96                   |
| acrA-05        | 51A    |    | 33.63 | 80.07      | 1.93                   |
| acrB-01        | 51A    |    | 38.62 | 76.07      | 1.87                   |
| acrF           | 51A    |    | 31.42 | 81.9       | 2 MultipleMeltPeaks    |
| acrR-01        | 51A    |    | 32.97 | 81.15      | 1.94                   |
| acrR-02        | 51A    |    | 31.8  | 82.94      | 1.92 MultipleMeltPeaks |
| Actin          | 51A    |    | 23.33 | 87.07      | 1.96                   |
| adeA           | 51A    |    |       |            | NoAmplification        |
| ampC-01        | 51A    |    | 35.13 | 85.52      | 1.83 MultipleMeltPeaks |
| ampC-02        | 51A    |    |       |            | CurveFitFailed         |
| ampC-04        | 51A    |    | 31.44 | 79.04      | 1.96                   |
| ampC-05        | 51A    |    |       |            | NoAmplification        |
| ampC-06        | 51A    |    |       |            | CurveFitFailed         |
| ampC-07        | 51A    |    | 44.23 | 62.04      | 1.67 MultipleMeltPeaks |
| ampC-09        | 51A    |    |       |            | CurveFitFailed         |
| ampC/blaDH     | 51A    |    | 29.93 | 84.65      | 1.94                   |

|                            |     |       |       |                           |
|----------------------------|-----|-------|-------|---------------------------|
| aph                        | 51A |       |       | NoAmplification           |
| aph(2')-Id-01              | 51A |       |       | NoAmplification           |
| aph(2')-Id-02              | 51A |       |       | NoAmplification           |
| aph6ia                     | 51A | 28.92 | 78.4  | 1.92                      |
| aphA1(aka k <sub>a</sub> ) | 51A |       |       | NoAmplification           |
| bacA-01                    | 51A | 37.27 | 77.16 | 1.84                      |
| bacA-02                    | 51A | 38.37 | 87.88 | 1.67 MultipleMeltPeaks    |
| BETA-globin                | 51A | 25.87 | 83.95 | 2                         |
| bla-ACC-1                  | 51A |       |       | CurveFitFailed            |
| bla-L1                     | 51A | 29.93 | 88.1  | 1.93 MultipleMeltPeaks    |
| bla1                       | 51A |       |       | NoAmplification           |
| blaCMY                     | 51A |       |       | NoAmplification           |
| blaCMY2-01                 | 51A |       |       | NoAmplification           |
| blaCMY2-02                 | 51A | 31.48 | 85.06 | 1.91                      |
| blaCTX-M-01                | 51A |       |       | NoAmplification           |
| blaCTX-M-02                | 51A | 31.75 | 79.45 | 1.87 MultipleMeltPeaks    |
| blaCTX-M-03                | 51A |       |       | NoAmplification           |
| blaCTX-M-04                | 51A | 32.17 | 87.81 | 1.91                      |
| blaCTX-M-05                | 51A | 31.72 | 76.38 | 1.76                      |
| blaCTX-M-06                | 51A |       |       | NoAmplification           |
| blaGES                     | 51A |       |       | NoAmplification           |
| blaIMP-01                  | 51A |       |       | NoAmplification           |
| blaIMP-02                  | 51A |       |       | NoAmplification           |
| blaMOX/blaC                | 51A |       |       | NoAmplification           |
| blaOCH                     | 51A | 32.46 | 83.08 | 2                         |
| blaOKP                     | 51A |       |       | NoAmplification           |
| blaOXA1/blaC               | 51A |       |       | NoAmplification           |
| blaOXA10-01                | 51A | 32.57 | 78.24 | 1.93                      |
| blaOXA10-02                | 51A |       |       | NoAmplification           |
| blaOXY                     | 51A | 34.31 | 87.09 | 1.81                      |
| blaPAO                     | 51A |       |       | CtIsLarge, CurveFitFailed |
| blaPER                     | 51A | 34.3  | 76.38 | 1.87                      |
| blaPSE                     | 51A |       |       | NoAmplification           |
| blaROB                     | 51A |       |       | NoAmplification           |
| blaSFO                     | 51A | 29.15 | 83.94 | 1.93 MultipleMeltPeaks    |
| blaSHV-01                  | 51A | 31.53 | 87.82 | 1.86                      |
| blaSHV-02                  | 51A | 37.87 | 81.98 | 1.75                      |
| blaTEM                     | 51A | 35.48 | 83.6  | 1.85                      |
| blaTLA                     | 51A |       |       | NoAmplification           |
| blaVEB                     | 51A |       |       | NoAmplification           |
| blaVIM                     | 51A |       |       | NoAmplification           |
| blaZ                       | 51A |       |       | NoAmplification           |
| carB                       | 51A | 38.57 | 79.94 | 1.75 MultipleMeltPeaks    |
| catA1                      | 51A |       |       | NoAmplification           |
| catB3                      | 51A | 34.71 | 87.55 | 1.88 MultipleMeltPeaks    |
| catB8                      | 51A | 28.22 | 82.74 | 1.98                      |

|            |     |       |       |      |                              |
|------------|-----|-------|-------|------|------------------------------|
| ceoA       | 51A | 27.89 | 82.24 | 1.92 | MultipleMeltPeaks            |
| cepA       | 51A |       |       |      | NoAmplification              |
| cfiA       | 51A | 32.94 | 87.12 | 1.82 |                              |
| cfr        | 51A |       |       |      | NoAmplification              |
| cfxA       | 51A | 25.97 | 77.47 | 2.02 |                              |
| cmeA       | 51A | 38.75 | 84.86 | 1.69 |                              |
| cmlA1-01   | 51A |       |       |      | CurveFitFailed               |
| cmlA1-02   | 51A |       |       |      | NoAmplification              |
| cmr        | 51A |       |       |      | CurveFitFailed               |
| cmx(A)     | 51A | 28.51 | 86.71 | 1.96 |                              |
| cphA-01    | 51A | 30.64 | 85.82 | 1.88 |                              |
| cphA-02    | 51A | 35.54 | 82.25 | 1.83 |                              |
| dfrA1      | 51A |       |       |      | NoAmplification              |
| dfrA12     | 51A | 35.69 | 85.53 | 1.73 |                              |
| emrD       | 51A |       |       |      | CurveFitFailed               |
| ereA       | 51A | 35.67 | 82.43 | 1.88 |                              |
| ereB       | 51A | 33.68 | 88.02 | 1.85 |                              |
| erm(34)    | 51A |       |       |      | CurveFitFailed               |
| erm(35)    | 51A | 34.59 | 85.45 | 1.87 | MultipleMeltPeaks            |
| erm(36)    | 51A | 32.22 | 82.12 | 1.86 | MultipleMeltPeaks            |
| ermA       | 51A |       |       |      | NoAmplification              |
| ermA/ermTR | 51A |       |       |      | NoAmplification              |
| ermB       | 51A | 24.04 | 74.97 | 2.01 |                              |
| ermC       | 51A | 37.51 | 61.88 | 1.97 | MultipleMeltPeaks            |
| ermF       | 51A |       |       |      | NoAmplification              |
| ermJ/ermD  | 51A |       |       |      | NoAmplification              |
| ermK-01    | 51A |       |       |      | NoAmplification              |
| ermK-02    | 51A | 41.04 | 85.6  | 1.55 | MultipleMeltPeaks            |
| ermT-01    | 51A |       |       |      | NoAmplification              |
| ermT-02    | 51A | 37.06 | 79.53 | 1.81 |                              |
| ermX       | 51A | 36.89 | 83.45 | 1.7  |                              |
| ermY       | 51A |       |       |      | NoAmplification              |
| fabK       | 51A | 22.5  | 77.64 | 2.13 |                              |
| floR       | 51A |       |       |      | NoAmplification              |
| folA       | 51A |       |       |      | NoAmplification              |
| fosB       | 51A |       |       |      | LowEfficiency, CtIsSmall, S: |
| fosX       | 51A |       |       |      | NoAmplification              |
| fox5       | 51A | 27.6  | 86.1  | 1.92 |                              |
| imiR       | 51A |       |       |      | CurveFitFailed               |
| lmrA-01    | 51A | 35.93 | 82.72 | 1.91 |                              |
| intl       | 51A | 29.98 | 84.67 | 1.93 |                              |
| intl1      | 51A | 21.78 | 87.07 | 1.98 |                              |
| IS613      | 51A | 26.32 | 79.83 | 2.07 |                              |
| lnuA-01    | 51A |       |       |      | LowEfficiency, CtIsSmall, C: |
| lnuB-01    | 51A |       |       |      | NoAmplification              |
| lnuB-02    | 51A |       |       |      | NoAmplification              |

|               |     |       |       |      |                   |
|---------------|-----|-------|-------|------|-------------------|
| lnuC          | 51A |       |       |      | NoAmplification   |
| marR-01       | 51A | 36.04 | 85.42 | 1.83 |                   |
| matA/mel      | 51A | 23.6  | 77.69 | 2.07 |                   |
| mdet1         | 51A |       |       |      | NoAmplification   |
| mdtA          | 51A |       |       |      | NoAmplification   |
| mdtE/yhiU     | 51A | 32.99 | 87.23 | 1.88 |                   |
| mecA          | 51A |       |       |      | NoAmplification   |
| mefA          | 51A | 22.2  | 80.68 | 1.96 |                   |
| mepA          | 51A | 35.28 | 78.39 | 1.85 | MultipleMeltPeaks |
| mexA          | 51A | 34.21 | 89    | 1.82 |                   |
| mexD          | 51A | 33.13 | 80.06 | 2.03 |                   |
| mexE          | 51A | 32.59 | 87.48 | 1.86 |                   |
| mexF          | 51A | 28.22 | 87.24 | 1.97 |                   |
| mphA-01       | 51A | 30.74 | 86.72 | 1.9  |                   |
| mphA-02       | 51A | 33.26 | 83.38 | 2.19 | MultipleMeltPeaks |
| mphB          | 51A |       |       |      | NoAmplification   |
| mphC          | 51A | 33.54 | 73.12 | 1.9  | MultipleMeltPeaks |
| msrA-01       | 51A |       |       |      | NoAmplification   |
| msrC-01       | 51A |       |       |      | NoAmplification   |
| mtrC-01       | 51A | 38.18 | 83.29 | 1.72 |                   |
| mtrC-02       | 51A | 34.02 | 83.85 | 1.85 | MultipleMeltPeaks |
| mtrD-02       | 51A | 28.09 | 83.8  | 2.05 | MultipleMeltPeaks |
| mtrD-03       | 51A | 31.92 | 81.93 | 1.88 |                   |
| NDM1          | 51A |       |       |      | NoAmplification   |
| nimE          | 51A |       |       |      | NoAmplification   |
| nisB          | 51A |       |       |      | NoAmplification   |
| oleC          | 51A |       |       |      | CurveFitFailed    |
| oprD          | 51A | 28.95 | 83.54 | 1.97 | MultipleMeltPeaks |
| oprJ          | 51A | 29.34 | 91.32 | 1.96 |                   |
| pbp           | 51A |       |       |      | CurveFitFailed    |
| pbp2x         | 51A | 21.77 | 76.33 | 2.12 |                   |
| Pbp5          | 51A |       |       |      | CurveFitFailed    |
| penA          | 51A | 33.6  | 85.96 | 1.81 | MultipleMeltPeaks |
| pikR1         | 51A |       |       |      | NoAmplification   |
| pikR2         | 51A | 29.47 | 84.71 | 2.03 |                   |
| pmrA          | 51A | 24.07 | 79.44 | 2.04 |                   |
| pncA          | 51A | 32.71 | 81.96 | 1.82 |                   |
| putative mult | 51A | 36.28 | 76.64 | 1.81 | MultipleMeltPeaks |
| qac           | 51A |       |       |      | NoAmplification   |
| qacA          | 51A | 33.7  | 70.63 | 2.03 |                   |
| qacA/qacB     | 51A |       |       |      | NoAmplification   |
| qacEdelta1-0  | 51A |       |       |      | NoAmplification   |
| qacEdelta1-0  | 51A | 39.85 | 74.76 | 1.8  |                   |
| qacH-01       | 51A | 31.74 | 87.67 | 1.88 |                   |
| qacH-02       | 51A | 33.47 | 84.02 | 1.74 |                   |
| qnrA          | 51A |       |       |      | CurveFitFailed    |

|              |     |       |       |      |                             |
|--------------|-----|-------|-------|------|-----------------------------|
| rarD-02      | 51A |       |       |      | CurveFitFailed              |
| sat4         | 51A |       |       |      | NoAmplification             |
| sdeB         | 51A |       |       |      | NoAmplification             |
| spcN-01      | 51A |       |       |      | NoAmplification             |
| speA         | 51A |       |       |      | NoAmplification             |
| str          | 51A |       |       |      | NoAmplification             |
| strA         | 51A |       |       |      | NoAmplification             |
| strB         | 51A | 42.3  | 62.94 | 1.68 | MultipleMeltPeaks           |
| sul1         | 51A | 37.41 | 88.27 | 1.67 |                             |
| sul2         | 51A | 35.67 | 75.1  | 1.62 |                             |
| sulA/foIP-01 | 51A | 23    | 81.86 | 1.94 |                             |
| sulA/foIP-03 | 51A | 20.45 | 83.25 | 2.02 |                             |
| tet(32)      | 51A |       |       |      | NoAmplification             |
| tet(34)      | 51A |       |       |      | CurveFitFailed              |
| tet(35)      | 51A |       |       |      | NoAmplification             |
| tet(36)-A    | 51A |       |       |      | NoAmplification             |
| tet(36)-B    | 51A |       |       |      | NoAmplification             |
| tet(37)      | 51A | 25.76 | 76.45 | 2.01 |                             |
| tetA-01      | 51A | 32.93 | 85.03 | 1.97 |                             |
| tetA-02      | 51A |       |       |      | NoAmplification             |
| tetB-01      | 51A | 32.94 | 86.62 | 1.96 | MultipleMeltPeaks           |
| tetB-02      | 51A | 37.74 | 61.81 | 2    | MultipleMeltPeaks           |
| tetC-01      | 51A |       |       |      | NoAmplification             |
| tetC-02      | 51A |       |       |      | NoAmplification             |
| tetD-01      | 51A |       |       |      | CurveFitFailed              |
| tetD-02      | 51A |       |       |      | NoAmplification             |
| tetE         | 51A |       |       |      | NoAmplification             |
| tetG-01      | 51A | 33.83 | 85.7  | 1.89 |                             |
| tetG-02      | 51A | 35.64 | 83.74 | 1.83 | MultipleMeltPeaks           |
| tetH         | 51A |       |       |      | NoAmplification             |
| tetJ         | 51A | 33.67 | 80.29 | 1.94 |                             |
| tetK         | 51A |       |       |      | NoAmplification             |
| tetL-01      | 51A |       |       |      | CurveFitFailed              |
| tetL-02      | 51A | 32.93 | 85.19 | 1.8  |                             |
| tetM-01      | 51A | 25.93 | 75.91 | 1.97 |                             |
| tetM-02      | 51A | 26.75 | 77.15 | 1.95 |                             |
| tetO-01      | 51A | 28.73 | 76.67 | 1.97 |                             |
| tetPA        | 51A |       |       |      | NoAmplification             |
| tetPB-01     | 51A |       |       |      | NoAmplification             |
| tetPB-02     | 51A | 33.96 | 84.66 | 1.9  |                             |
| tetPB-03     | 51A |       |       |      | NoAmplification             |
| tetPB-05     | 51A |       |       |      | NoAmplification             |
| tetQ         | 51A | 24.02 | 77.53 | 2.02 |                             |
| tetR-02      | 51A | 34.52 | 89.38 | 1.81 |                             |
| tetR-03      | 51A |       |       |      | NoAmplification             |
| tetS         | 51A |       |       |      | BadR2, HighEfficiency, Satu |

|             |     |       |       |      |                   |
|-------------|-----|-------|-------|------|-------------------|
| tetT        | 51A |       |       |      | NoAmplification   |
| tetU-01     | 51A |       |       |      | NoAmplification   |
| tetV        | 51A |       |       |      | NoAmplification   |
| tetW-01     | 51A | 28.14 | 81.38 | 1.95 |                   |
| tetX        | 51A |       |       |      | NoAmplification   |
| tnpA-01     | 51A |       |       |      | NoAmplification   |
| tnpA-02     | 51A | 34.67 | 84.48 | 1.67 |                   |
| tnpA-03     | 51A | 33.18 | 75.07 | 2.2  |                   |
| tnpA-04     | 51A | 34.52 | 78.44 | 1.88 |                   |
| tnpA-05     | 51A |       |       |      | NoAmplification   |
| tnpA-07     | 51A |       |       |      | CurveFitFailed    |
| tolC-01     | 51A | 38.25 | 79.98 | 1.78 | MultipleMeltPeaks |
| tolC-02     | 51A | 32.83 | 83.61 | 1.97 | MultipleMeltPeaks |
| tolC-03     | 51A | 32.89 | 85.05 | 1.92 |                   |
| Tp614       | 51A | 33.5  | 83.36 | 1.88 |                   |
| ttgA        | 51A | 43.75 | 65.86 | 1.84 | MultipleMeltPeaks |
| ttgB        | 51A | 33.24 | 77.87 | 1.96 |                   |
| vanA        | 51A |       |       |      | NoAmplification   |
| vanB-01     | 51A | 30.47 | 83.71 | 1.92 |                   |
| vanC-01     | 51A |       |       |      | NoAmplification   |
| vanC-02     | 51A |       |       |      | NoAmplification   |
| vanC-03     | 51A | 28.08 | 86.17 | 1.93 |                   |
| vanC1       | 51A |       |       |      | NoAmplification   |
| vanC2/vanC3 | 51A | 33.69 | 81    | 1.96 | MultipleMeltPeaks |
| vanG        | 51A |       |       |      | NoAmplification   |
| vanHB       | 51A | 32.99 | 87.54 | 1.87 |                   |
| vanHD       | 51A | 36.46 | 74.86 | 1.78 | MultipleMeltPeaks |
| vanRA-01    | 51A |       |       |      | NoAmplification   |
| vanRA-02    | 51A | 43.45 | 75.97 | 1.7  | MultipleMeltPeaks |
| vanRB       | 51A | 33.37 | 87.42 | 1.84 |                   |
| vanRC       | 51A |       |       |      | NoAmplification   |
| vanRC4      | 51A |       |       |      | NoAmplification   |
| vanRD       | 51A |       |       |      | NoAmplification   |
| vanSA       | 51A |       |       |      | NoAmplification   |
| vanSB       | 51A | 30.65 | 74.66 | 2.02 |                   |
| vanSC-01    | 51A |       |       |      | CurveFitFailed    |
| vanSC-02    | 51A |       |       |      | NoAmplification   |
| vanTC-01    | 51A |       |       |      | NoAmplification   |
| vanTC-02    | 51A | 38.53 | 61.16 | 1.66 | MultipleMeltPeaks |
| vanTE       | 51A | 39.41 | 87.92 | 1.63 | MultipleMeltPeaks |
| vanTG       | 51A | 40.58 | 73.75 | 1.86 |                   |
| vanWB       | 51A |       |       |      | NoAmplification   |
| vanWG       | 51A | 30.03 | 75.62 | 2.02 |                   |
| vanXA       | 51A |       |       |      | CurveFitFailed    |
| vanXB       | 51A |       |       |      | NoAmplification   |
| vanXD       | 51A | 30.66 | 75.22 | 2.06 |                   |

|              |     |       |       |      |                   |
|--------------|-----|-------|-------|------|-------------------|
| vanYB        | 51A |       |       |      | CurveFitFailed    |
| vanYD-01     | 51A | 33.56 | 81.16 | 1.81 |                   |
| vanYD-02     | 51A | 35.58 | 75.06 | 1.92 |                   |
| vatB-01      | 51A |       |       |      | CurveFitFailed    |
| vatB-02      | 51A | 33.93 | 80.09 | 1.89 | MultipleMeltPeaks |
| vatC-01      | 51A |       |       |      | CurveFitFailed    |
| vatC-02      | 51A | 34.69 | 87.56 | 1.8  |                   |
| vatE-01      | 51A | 28.71 | 77.31 | 2.16 |                   |
| vatE-02      | 51A | 34.97 | 76.08 | 2.1  |                   |
| vgaA-01      | 51A |       |       |      | NoAmplification   |
| vgaA-02      | 51A | 36.35 | 71.01 | 1.95 |                   |
| vgb-01       | 51A | 37.16 | 74.7  | 1.82 | MultipleMeltPeaks |
| vgbB-01      | 51A |       |       |      | NoAmplification   |
| vgbB-02      | 51A | 36.35 | 72.92 | 1.93 |                   |
| yceE/mdtG-0  | 51A |       |       |      | NoAmplification   |
| yceE/mdtG-0  | 51A |       |       |      | NoAmplification   |
| yceL/mdtH-0  | 51A | 28.6  | 76.09 | 2.01 | MultipleMeltPeaks |
| yceL/mdtH-0  | 51A |       |       |      | NoAmplification   |
| yceL/mdtH-0  | 51A | 32.28 | 78.04 | 1.98 |                   |
| yidY/mdtL-01 | 51A | 33.42 | 79.98 | 1.9  | MultipleMeltPeaks |
| yidY/mdtL-02 | 51A | 38.73 | 81.84 | 1.82 | MultipleMeltPeaks |































| Assay          | Sample | Ct | Tm    | Efficiency | flag                      |
|----------------|--------|----|-------|------------|---------------------------|
| 16S rRNA       | 51B    |    | 16.61 | 82.36      | 2.02                      |
| aac            | 51B    |    | 33.78 | 81.47      | 1.63 MultipleMeltPeaks    |
| aac(6')-Ib(akz | 51B    |    | 36.47 | 82.19      | 1.82                      |
| aac(6')-Ib(akz | 51B    |    | 31.28 | 81.63      | 1.95 MultipleMeltPeaks    |
| aac(6')-Ib(akz | 51B    |    | 33.16 | 85.74      | 1.86 MultipleMeltPeaks    |
| aac(6')-II     | 51B    |    | 34.68 | 80.7       | 1.71 MultipleMeltPeaks    |
| aac(6')I1      | 51B    |    | 36.93 | 87.87      | 1.79                      |
| aacA/aphD      | 51B    |    |       |            | CurveFitFailed            |
| aacC           | 51B    |    | 30.04 | 88.65      | 1.87                      |
| aacC1          | 51B    |    |       |            | CurveFitFailed            |
| aacC2          | 51B    |    |       |            | CtIsLarge, CurveFitFailed |
| aacC4          | 51B    |    | 33.07 | 92.74      | 1.79                      |
| aadA-01        | 51B    |    |       |            | NoAmplification           |
| aadA-02        | 51B    |    | 31.18 | 80.51      | 1.95                      |
| aadA-1-01      | 51B    |    | 34.22 | 81.29      | 1.83                      |
| aadA-1-02      | 51B    |    |       |            | NoAmplification           |
| aadA1          | 51B    |    |       |            | CurveFitFailed            |
| aadA2-01       | 51B    |    | 41.59 | 79.47      | 1.71                      |
| aadA2-02       | 51B    |    | 31.72 | 75.45      | 2.02                      |
| aadA2-03       | 51B    |    |       |            | NoAmplification           |
| aadA5-01       | 51B    |    | 33.89 | 83.53      | 1.84 MultipleMeltPeaks    |
| aadA5-02       | 51B    |    | 32.86 | 83.33      | 1.89 MultipleMeltPeaks    |
| aadA9-01       | 51B    |    | 35.3  | 88.59      | 1.81                      |
| aadA9-02       | 51B    |    | 37.93 | 74.2       | 2 MultipleMeltPeaks       |
| aadD           | 51B    |    |       |            | CurveFitFailed            |
| aadE           | 51B    |    | 36.29 | 73.46      | 1.88                      |
| acrA-01        | 51B    |    | 32.68 | 88.51      | 1.83                      |
| acrA-02        | 51B    |    | 33.44 | 90.11      | 1.83                      |
| acrA-03        | 51B    |    |       |            | NoAmplification           |
| acrA-04        | 51B    |    | 28.83 | 80.67      | 1.97                      |
| acrA-05        | 51B    |    | 29.52 | 79.7       | 1.97 MultipleMeltPeaks    |
| acrB-01        | 51B    |    | 37.77 | 61.95      | 2.07 MultipleMeltPeaks    |
| acrF           | 51B    |    | 30.13 | 82.24      | 1.99                      |
| acrR-01        | 51B    |    | 30.42 | 88.15      | 1.9                       |
| acrR-02        | 51B    |    | 34.96 | 86.81      | 1.82                      |
| Actin          | 51B    |    | 22.93 | 87.22      | 1.95                      |
| adeA           | 51B    |    | 33.55 | 88.21      | 1.88                      |
| ampC-01        | 51B    |    | 34.56 | 79.56      | 1.87 MultipleMeltPeaks    |
| ampC-02        | 51B    |    | 36.72 | 78.51      | 1.83 MultipleMeltPeaks    |
| ampC-04        | 51B    |    | 29.88 | 83.43      | 1.99 MultipleMeltPeaks    |
| ampC-05        | 51B    |    |       |            | NoAmplification           |
| ampC-06        | 51B    |    | 31.72 | 84.23      | 1.95                      |
| ampC-07        | 51B    |    | 38.43 | 81.59      | 1.77                      |
| ampC-09        | 51B    |    | 37.31 | 87.28      | 1.73                      |
| ampC/blaDH     | 51B    |    | 29.19 | 84.39      | 1.97                      |

|               |     |       |       |      |                              |
|---------------|-----|-------|-------|------|------------------------------|
| aph           | 51B |       |       |      | LowEfficiency, CtIsSmall, Ci |
| aph(2')-Id-01 | 51B |       |       |      | NoAmplification              |
| aph(2')-Id-02 | 51B |       |       |      | LowEfficiency, CtIsSmall, S: |
| aph6ia        | 51B | 26.79 | 80.52 | 1.94 | MultipleMeltPeaks            |
| aphA1(aka k:  | 51B |       |       |      | NoAmplification              |
| bacA-01       | 51B | 37.96 | 74.49 | 1.82 |                              |
| bacA-02       | 51B | 36.65 | 88.27 | 1.68 |                              |
| BETA-globin   | 51B | 25.95 | 83.73 | 2.02 | MultipleMeltPeaks            |
| bla-ACC-1     | 51B | 36.4  | 86.32 | 1.75 |                              |
| bla-L1        | 51B | 27.34 | 85.88 | 1.97 |                              |
| bla1          | 51B |       |       |      | NoAmplification              |
| blaCMY        | 51B | 38.62 | 61.53 | 1.83 | MultipleMeltPeaks            |
| blaCMY2-01    | 51B | 31.44 | 75.02 | 2.07 |                              |
| blaCMY2-02    | 51B | 28.9  | 86.45 | 1.88 |                              |
| blaCTX-M-01   | 51B |       |       |      | NoAmplification              |
| blaCTX-M-02   | 51B | 30.11 | 79.55 | 1.88 | MultipleMeltPeaks            |
| blaCTX-M-03   | 51B |       |       |      | NoAmplification              |
| blaCTX-M-04   | 51B | 33.45 | 88.99 | 1.83 |                              |
| blaCTX-M-05   | 51B | 32.84 | 76.02 | 1.78 |                              |
| blaCTX-M-06   | 51B | 36.86 | 84.19 | 1.85 | MultipleMeltPeaks            |
| blaGES        | 51B |       |       |      | LowEfficiency, CtIsSmall, S: |
| blaIMP-01     | 51B | 44.37 | 75.1  | 1.68 |                              |
| blaIMP-02     | 51B | 31.98 | 83.63 | 1.98 |                              |
| blaMOX/blaC   | 51B | 32.14 | 82.35 | 1.95 |                              |
| blaOCH        | 51B |       |       |      | NoAmplification              |
| blaOKP        | 51B |       |       |      | NoAmplification              |
| blaOXA1/blaC  | 51B |       |       |      | NoAmplification              |
| blaOXA10-01   | 51B |       |       |      | LowEfficiency, CtIsSmall, Ci |
| blaOXA10-02   | 51B |       |       |      | CurveFitFailed               |
| blaOXY        | 51B | 32.09 | 89.68 | 1.82 |                              |
| blaPAO        | 51B |       |       |      | NoAmplification              |
| blaPER        | 51B | 38.58 | 70.26 | 1.68 |                              |
| blaPSE        | 51B |       |       |      | NoAmplification              |
| blaROB        | 51B | 34.27 | 85.94 | 1.8  |                              |
| blaSFO        | 51B | 29.51 | 84.03 | 1.94 | MultipleMeltPeaks            |
| blaSHV-01     | 51B | 29.78 | 87.91 | 2.03 |                              |
| blaSHV-02     | 51B | 33.04 | 83.1  | 1.98 |                              |
| blaTEM        | 51B | 36.8  | 83.96 | 1.76 | MultipleMeltPeaks            |
| blaTLA        | 51B |       |       |      | NoAmplification              |
| blaVEB        | 51B |       |       |      | NoAmplification              |
| blaVIM        | 51B | 39.36 | 76.95 | 1.99 | MultipleMeltPeaks            |
| blaZ          | 51B |       |       |      | NoAmplification              |
| carB          | 51B |       |       |      | NoAmplification              |
| catA1         | 51B |       |       |      | NoAmplification              |
| catB3         | 51B | 36.64 | 79.69 | 1.82 |                              |
| catB8         | 51B | 27.63 | 84.39 | 1.97 |                              |

|            |     |       |       |      |                              |
|------------|-----|-------|-------|------|------------------------------|
| ceoA       | 51B | 27.89 | 82.36 | 1.93 |                              |
| cepA       | 51B |       |       |      | NoAmplification              |
| cfiA       | 51B | 31.21 | 86.96 | 1.91 |                              |
| cfr        | 51B |       |       |      | CurveFitFailed               |
| cfxA       | 51B | 23.78 | 77.52 | 2.02 |                              |
| cmeA       | 51B | 37.58 | 84.96 | 1.82 |                              |
| cmlA1-01   | 51B | 37.55 | 88.71 | 1.77 |                              |
| cmlA1-02   | 51B |       |       |      | NoAmplification              |
| cmr        | 51B |       |       |      | CurveFitFailed               |
| cmx(A)     | 51B | 27.2  | 84.98 | 1.95 |                              |
| cphA-01    | 51B | 32.47 | 85.63 | 1.91 | MultipleMeltPeaks            |
| cphA-02    | 51B | 34.36 | 82.33 | 1.89 |                              |
| dfrA1      | 51B |       |       |      | NoAmplification              |
| dfrA12     | 51B | 38.5  | 82.59 | 1.77 |                              |
| emrD       | 51B | 38.24 | 87.16 | 1.7  | MultipleMeltPeaks            |
| ereA       | 51B | 39.16 | 82.45 | 1.72 | MultipleMeltPeaks            |
| ereB       | 51B | 31.67 | 88.2  | 1.96 | MultipleMeltPeaks            |
| erm(34)    | 51B | 38.96 | 87.1  | 1.82 |                              |
| erm(35)    | 51B |       |       |      | CurveFitFailed               |
| erm(36)    | 51B | 29.57 | 86.11 | 2.03 |                              |
| ermA       | 51B |       |       |      | NoAmplification              |
| ermA/ermTR | 51B |       |       |      | CurveFitFailed               |
| ermB       | 51B | 21.81 | 75.21 | 2.07 |                              |
| ermC       | 51B |       |       |      | CurveFitFailed               |
| ermF       | 51B |       |       |      | NoAmplification              |
| ermJ/ermD  | 51B |       |       |      | NoAmplification              |
| ermK-01    | 51B | 37.5  | 76.28 | 2.39 | MultipleMeltPeaks            |
| ermK-02    | 51B | 37.9  | 81.81 | 1.62 | MultipleMeltPeaks            |
| ermT-01    | 51B |       |       |      | NoAmplification              |
| ermT-02    | 51B |       |       |      | NoAmplification              |
| ermX       | 51B | 36.19 | 79.96 | 1.69 | MultipleMeltPeaks            |
| ermY       | 51B |       |       |      | NoAmplification              |
| fabK       | 51B | 24.76 | 77.41 | 2.09 |                              |
| floR       | 51B |       |       |      | NoAmplification              |
| folA       | 51B |       |       |      | NoAmplification              |
| fosB       | 51B |       |       |      | LowEfficiency, CtIsSmall, S: |
| fosX       | 51B |       |       |      | NoAmplification              |
| fox5       | 51B | 26.77 | 86.34 | 1.93 | MultipleMeltPeaks            |
| imiR       | 51B |       |       |      | NoAmplification              |
| ImrA-01    | 51B | 42.08 | 79.63 | 1.78 | MultipleMeltPeaks            |
| intl       | 51B | 29.05 | 84.75 | 1.92 |                              |
| intl1      | 51B | 20.31 | 87.3  | 2.03 |                              |
| IS613      | 51B | 24.13 | 79.98 | 2.01 |                              |
| lnuA-01    | 51B |       |       |      | LowEfficiency, CtIsSmall, S: |
| lnuB-01    | 51B |       |       |      | LowEfficiency, CtIsSmall, S: |
| lnuB-02    | 51B |       |       |      | LowEfficiency, CtIsSmall, S: |

|               |     |       |       |      |                                          |
|---------------|-----|-------|-------|------|------------------------------------------|
| lnuC          | 51B | 37.02 | 84.13 | 1.61 | MultipleMeltPeaks                        |
| marR-01       | 51B | 32.53 | 87.21 | 1.85 |                                          |
| matA/mel      | 51B | 19.75 | 77.84 | 2.07 |                                          |
| mdetI1        | 51B |       |       |      | NoAmplification                          |
| mdtA          | 51B | 42.94 | 82.17 | 1.77 | MultipleMeltPeaks                        |
| mdtE/yhiU     | 51B | 31.17 | 87.2  | 1.89 | MultipleMeltPeaks                        |
| mecA          | 51B |       |       |      | NoAmplification                          |
| mefA          | 51B | 19.2  | 80.5  | 1.96 |                                          |
| mepA          | 51B | 32.84 | 78.28 | 1.91 | MultipleMeltPeaks                        |
| mexA          | 51B |       |       |      | NoAmplification                          |
| mexD          | 51B | 33.46 | 83.39 | 2.02 |                                          |
| mexE          | 51B | 38.07 | 80.59 | 1.72 | MultipleMeltPeaks                        |
| mexF          | 51B | 27.92 | 87.37 | 2.03 | MultipleMeltPeaks                        |
| mphA-01       | 51B | 31.62 | 85.78 | 1.99 |                                          |
| mphA-02       | 51B | 29.41 | 80.98 | 2.21 | MultipleMeltPeaks                        |
| mphB          | 51B |       |       |      | CurveFitFailed                           |
| mphC          | 51B |       |       |      | CurveFitFailed                           |
| msrA-01       | 51B |       |       |      | NoAmplification                          |
| msrC-01       | 51B |       |       |      | NoAmplification                          |
| mtrC-01       | 51B | 32.45 | 88.58 | 1.91 | MultipleMeltPeaks                        |
| mtrC-02       | 51B | 31.72 | 84.3  | 1.95 |                                          |
| mtrD-02       | 51B | 28.2  | 82.81 | 2.04 |                                          |
| mtrD-03       | 51B | 26.47 | 83.58 | 1.94 | MultipleMeltPeaks                        |
| NDM1          | 51B |       |       |      | NoAmplification                          |
| nimE          | 51B |       |       |      | BadR2, CtlsLarge, CurveFitf              |
| nisB          | 51B | 40.87 | 79.17 | 1.98 |                                          |
| oleC          | 51B | 38.39 | 84.05 | 1.81 |                                          |
| oprD          | 51B | 28.29 | 87.42 | 1.96 | MultipleMeltPeaks                        |
| oprJ          | 51B | 30.65 | 90.69 | 1.85 |                                          |
| pbp           | 51B | 38.47 | 81.57 | 1.83 |                                          |
| pbp2x         | 51B | 21.14 | 76.23 | 2.15 |                                          |
| Pbp5          | 51B |       |       |      | LowEfficiency, CtlsSmall, S <sub>c</sub> |
| penA          | 51B | 32.07 | 87.63 | 1.84 |                                          |
| pikR1         | 51B | 38.34 | 80.6  | 1.79 |                                          |
| pikR2         | 51B | 29.68 | 84.71 | 2.06 |                                          |
| pmrA          | 51B | 24.14 | 79.32 | 2.03 |                                          |
| pncA          | 51B | 31.94 | 84.33 | 1.86 |                                          |
| putative mult | 51B | 32.82 | 83.98 | 1.92 |                                          |
| qac           | 51B |       |       |      | NoAmplification                          |
| qacA          | 51B |       |       |      | CurveFitFailed                           |
| qacA/qacB     | 51B |       |       |      | CurveFitFailed                           |
| qacEdelta1-0  | 51B |       |       |      | NoAmplification                          |
| qacEdelta1-0  | 51B | 26.53 | 79.92 | 2.02 | MultipleMeltPeaks                        |
| qacH-01       | 51B | 29.56 | 87.39 | 1.91 | MultipleMeltPeaks                        |
| qacH-02       | 51B | 33.51 | 84.1  | 1.7  |                                          |
| qnrA          | 51B | 37.75 | 80.21 | 1.84 |                                          |



|              |     |       |       |      |                              |
|--------------|-----|-------|-------|------|------------------------------|
| rarD-02      | 51B |       |       |      | CurveFitFailed               |
| sat4         | 51B |       |       |      | NoAmplification              |
| sdeB         | 51B | 37.87 | 80.3  | 1.8  |                              |
| spcN-01      | 51B |       |       |      | NoAmplification              |
| speA         | 51B |       |       |      | NoAmplification              |
| str          | 51B |       |       |      | NoAmplification              |
| strA         | 51B |       |       |      | NoAmplification              |
| strB         | 51B | 41.36 | 61.86 | 1.67 | MultipleMeltPeaks            |
| sul1         | 51B | 33.05 | 89.85 | 1.81 |                              |
| sul2         | 51B | 32.32 | 75.27 | 1.68 |                              |
| sulA/foIP-01 | 51B | 23.89 | 81.14 | 1.96 |                              |
| sulA/foIP-03 | 51B | 20.7  | 84.01 | 2    |                              |
| tet(32)      | 51B | 28.75 | 81.22 | 1.99 |                              |
| tet(34)      | 51B | 32.56 | 75.79 | 2.02 |                              |
| tet(35)      | 51B |       |       |      | CurveFitFailed               |
| tet(36)-A    | 51B | 39.94 | 81.99 | 1.73 |                              |
| tet(36)-B    | 51B | 39.03 | 78.52 | 1.74 | MultipleMeltPeaks            |
| tet(37)      | 51B | 24.25 | 76.67 | 2.01 | MultipleMeltPeaks            |
| tetA-01      | 51B | 34.32 | 85    | 2.04 |                              |
| tetA-02      | 51B | 41.85 | 61.55 | 1.56 | MultipleMeltPeaks            |
| tetB-01      | 51B | 32.91 | 81.54 | 1.93 | MultipleMeltPeaks            |
| tetB-02      | 51B | 37.78 | 76.75 | 1.84 |                              |
| tetC-01      | 51B |       |       |      | NoAmplification              |
| tetC-02      | 51B |       |       |      | NoAmplification              |
| tetD-01      | 51B |       |       |      | LowEfficiency, CtIsSmall, S: |
| tetD-02      | 51B |       |       |      | CurveFitFailed               |
| tetE         | 51B |       |       |      | NoAmplification              |
| tetG-01      | 51B | 33.44 | 90.23 | 1.9  | MultipleMeltPeaks            |
| tetG-02      | 51B | 30.62 | 88.12 | 1.94 | MultipleMeltPeaks            |
| tetH         | 51B |       |       |      | NoAmplification              |
| tetJ         | 51B |       |       |      | CurveFitFailed               |
| tetK         | 51B |       |       |      | NoAmplification              |
| tetL-01      | 51B | 38.98 | 81.6  | 1.71 | MultipleMeltPeaks            |
| tetL-02      | 51B | 31.9  | 85.21 | 1.83 |                              |
| tetM-01      | 51B | 21.39 | 76.28 | 2.03 |                              |
| tetM-02      | 51B | 22.38 | 77.24 | 1.98 |                              |
| tetO-01      | 51B | 23.47 | 77.01 | 2    |                              |
| tetPA        | 51B |       |       |      | NoAmplification              |
| tetPB-01     | 51B |       |       |      | NoAmplification              |
| tetPB-02     | 51B | 33.09 | 84.68 | 1.92 |                              |
| tetPB-03     | 51B |       |       |      | NoAmplification              |
| tetPB-05     | 51B |       |       |      | CurveFitFailed               |
| tetQ         | 51B | 22.29 | 77.47 | 2.07 |                              |
| tetR-02      | 51B | 29.98 | 87.02 | 1.95 |                              |
| tetR-03      | 51B |       |       |      | CurveFitFailed               |
| tetS         | 51B | 38.22 | 84.84 | 1.78 |                              |

|             |     |       |       |      |                              |
|-------------|-----|-------|-------|------|------------------------------|
| tetT        | 51B |       |       |      | NoAmplification              |
| tetU-01     | 51B |       |       |      | NoAmplification              |
| tetV        | 51B |       |       |      | NoAmplification              |
| tetW-01     | 51B | 27.29 | 81.33 | 1.98 |                              |
| tetX        | 51B |       |       |      | NoAmplification              |
| tnpA-01     | 51B | 21.74 | 82.41 | 1.78 |                              |
| tnpA-02     | 51B | 34.79 | 86.17 | 1.76 |                              |
| tnpA-03     | 51B | 33.33 | 75.07 | 2.19 |                              |
| tnpA-04     | 51B |       |       |      | NoAmplification              |
| tnpA-05     | 51B | 33.39 | 83.57 | 1.77 |                              |
| tnpA-07     | 51B |       |       |      | NoAmplification              |
| tolC-01     | 51B | 36.93 | 80.35 | 1.8  | MultipleMeltPeaks            |
| tolC-02     | 51B | 30.98 | 87.68 | 1.9  |                              |
| tolC-03     | 51B | 30.88 | 85.95 | 1.93 |                              |
| Tp614       | 51B | 30.11 | 86.81 | 1.93 |                              |
| ttgA        | 51B |       |       |      | NoAmplification              |
| ttgB        | 51B | 33.01 | 84.7  | 1.91 |                              |
| vanA        | 51B |       |       |      | NoAmplification              |
| vanB-01     | 51B | 34.61 | 83.91 | 1.86 |                              |
| vanC-01     | 51B |       |       |      | NoAmplification              |
| vanC-02     | 51B |       |       |      | NoAmplification              |
| vanC-03     | 51B | 28.32 | 91.58 | 1.92 |                              |
| vanC1       | 51B |       |       |      | CurveFitFailed               |
| vanC2/vanC3 | 51B | 33.29 | 82.88 | 2.02 | MultipleMeltPeaks            |
| vanG        | 51B |       |       |      | NoAmplification              |
| vanHB       | 51B | 30.05 | 83.47 | 1.93 |                              |
| vanHD       | 51B | 33.36 | 84.35 | 1.9  |                              |
| vanRA-01    | 51B |       |       |      | CurveFitFailed               |
| vanRA-02    | 51B |       |       |      | CurveFitFailed               |
| vanRB       | 51B | 32.67 | 87.41 | 2.07 |                              |
| vanRC       | 51B |       |       |      | LowEfficiency, CtIsSmall, S: |
| vanRC4      | 51B |       |       |      | NoAmplification              |
| vanRD       | 51B |       |       |      | NoAmplification              |
| vanSA       | 51B |       |       |      | NoAmplification              |
| vanSB       | 51B | 29.43 | 75.02 | 2.03 |                              |
| vanSC-01    | 51B | 37.67 | 77.26 | 1.78 |                              |
| vanSC-02    | 51B |       |       |      | NoAmplification              |
| vanTC-01    | 51B |       |       |      | NoAmplification              |
| vanTC-02    | 51B | 32.86 | 86.28 | 1.84 |                              |
| vanTE       | 51B | 37.95 | 77.98 | 1.72 | MultipleMeltPeaks            |
| vanTG       | 51B | 33.75 | 74.76 | 2.03 |                              |
| vanWB       | 51B |       |       |      | NoAmplification              |
| vanWG       | 51B | 36.16 | 74.19 | 1.88 |                              |
| vanXA       | 51B |       |       |      | NoAmplification              |
| vanXB       | 51B |       |       |      | NoAmplification              |
| vanXD       | 51B | 28.86 | 75.34 | 2.07 |                              |

|              |     |       |       |      |                   |
|--------------|-----|-------|-------|------|-------------------|
| vanYB        | 51B |       |       |      | CurveFitFailed    |
| vanYD-01     | 51B | 33.69 | 82.62 | 1.85 | MultipleMeltPeaks |
| vanYD-02     | 51B | 38.12 | 73.92 | 1.85 | MultipleMeltPeaks |
| vatB-01      | 51B |       |       |      | CurveFitFailed    |
| vatB-02      | 51B | 34.47 | 82.61 | 1.88 |                   |
| vatC-01      | 51B |       |       |      | CurveFitFailed    |
| vatC-02      | 51B | 39.3  | 83.38 | 1.79 |                   |
| vatE-01      | 51B | 29.3  | 77.56 | 2.11 |                   |
| vatE-02      | 51B | 36.43 | 79.41 | 1.94 |                   |
| vgaA-01      | 51B |       |       |      | NoAmplification   |
| vgaA-02      | 51B |       |       |      | CurveFitFailed    |
| vgb-01       | 51B | 35.71 | 75.31 | 1.91 |                   |
| vgbB-01      | 51B |       |       |      | NoAmplification   |
| vgbB-02      | 51B |       |       |      | NoAmplification   |
| yceE/mdtG-0  | 51B | 37.07 | 77.49 | 1.84 |                   |
| yceE/mdtG-0  | 51B |       |       |      | NoAmplification   |
| yceL/mdtH-0  | 51B | 28.07 | 82.7  | 2.02 | MultipleMeltPeaks |
| yceL/mdtH-0  | 51B |       |       |      | NoAmplification   |
| yceL/mdtH-0  | 51B | 37.37 | 76.01 | 1.78 |                   |
| yidY/mdtL-01 | 51B | 29.3  | 84.42 | 2.16 |                   |
| yidY/mdtL-02 | 51B | 36.78 | 81.62 | 1.83 |                   |































| Assay          | Sample | Ct | Tm    | Efficiency | flag                        |
|----------------|--------|----|-------|------------|-----------------------------|
| 16S rRNA       | 51C    |    | 16.53 | 82.33      | 2                           |
| aac            | 51C    |    | 36.14 | 80.81      | 1.67 MultipleMeltPeaks      |
| aac(6')-Ib(akz | 51C    |    |       |            | NoAmplification             |
| aac(6')-Ib(akz | 51C    |    | 32.99 | 82.86      | 1.95                        |
| aac(6')-Ib(akz | 51C    |    | 36.32 | 80.9       | 1.82 MultipleMeltPeaks      |
| aac(6')-II     | 51C    |    |       |            | CurveFitFailed              |
| aac(6')I1      | 51C    |    | 35.6  | 85.55      | 1.8                         |
| aacA/aphD      | 51C    |    |       |            | NoAmplification             |
| aacC           | 51C    |    | 30.67 | 88.71      | 1.93 MultipleMeltPeaks      |
| aacC1          | 51C    |    |       |            | LowEfficiency, CtIsSmall, C |
| aacC2          | 51C    |    |       |            | BadR2, LowEfficiency, CtIsS |
| aacC4          | 51C    |    | 32.79 | 89.7       | 1.81                        |
| aadA-01        | 51C    |    |       |            | NoAmplification             |
| aadA-02        | 51C    |    | 31.36 | 80.41      | 1.96                        |
| aadA-1-01      | 51C    |    |       |            | NoAmplification             |
| aadA-1-02      | 51C    |    |       |            | CurveFitFailed              |
| aadA1          | 51C    |    | 39.22 | 83.7       | 1.76 MultipleMeltPeaks      |
| aadA2-01       | 51C    |    |       |            | NoAmplification             |
| aadA2-02       | 51C    |    | 32.08 | 75.61      | 2.01                        |
| aadA2-03       | 51C    |    |       |            | NoAmplification             |
| aadA5-01       | 51C    |    | 32.84 | 77.35      | 2 MultipleMeltPeaks         |
| aadA5-02       | 51C    |    |       |            | CurveFitFailed              |
| aadA9-01       | 51C    |    |       |            | CurveFitFailed              |
| aadA9-02       | 51C    |    |       |            | NoAmplification             |
| aadD           | 51C    |    |       |            | CurveFitFailed              |
| aadE           | 51C    |    |       |            | LowEfficiency, CtIsSmall, S |
| acrA-01        | 51C    |    | 31.53 | 88.5       | 1.85                        |
| acrA-02        | 51C    |    | 33.48 | 85.23      | 1.87 MultipleMeltPeaks      |
| acrA-03        | 51C    |    |       |            | LowEfficiency, CtIsSmall, S |
| acrA-04        | 51C    |    | 31.38 | 80.71      | 1.96                        |
| acrA-05        | 51C    |    | 30.05 | 89.51      | 1.95 MultipleMeltPeaks      |
| acrB-01        | 51C    |    | 38.16 | 75.21      | 1.86                        |
| acrF           | 51C    |    | 31.29 | 84.78      | 1.89 MultipleMeltPeaks      |
| acrR-01        | 51C    |    | 38.26 | 61.47      | 1.96 MultipleMeltPeaks      |
| acrR-02        | 51C    |    | 37.04 | 83.17      | 1.79                        |
| Actin          | 51C    |    | 24    | 87.13      | 1.95                        |
| adeA           | 51C    |    |       |            | LowEfficiency, CtIsSmall, S |
| ampC-01        | 51C    |    | 33.1  | 80.17      | 2.03                        |
| ampC-02        | 51C    |    | 40.34 | 79.1       | 1.89 MultipleMeltPeaks      |
| ampC-04        | 51C    |    | 33.26 | 78.46      | 1.98                        |
| ampC-05        | 51C    |    |       |            | CurveFitFailed              |
| ampC-06        | 51C    |    |       |            | LowEfficiency, CtIsSmall, S |
| ampC-07        | 51C    |    |       |            | CurveFitFailed              |
| ampC-09        | 51C    |    |       |            | NoAmplification             |
| ampC/blaDH     | 51C    |    | 32.65 | 84.65      | 1.94                        |

|               |     |       |       |      |                              |
|---------------|-----|-------|-------|------|------------------------------|
| aph           | 51C |       |       |      | LowEfficiency, CtIsSmall, S: |
| aph(2')-Id-01 | 51C |       |       |      | LowEfficiency, CtIsSmall, S: |
| aph(2')-Id-02 | 51C |       |       |      | LowEfficiency, CtIsSmall, S: |
| aph6ia        | 51C | 26.63 | 78.68 | 1.97 |                              |
| aphA1(aka k   | 51C |       |       |      | NoAmplification              |
| bacA-01       | 51C | 36.92 | 84.66 | 1.84 |                              |
| bacA-02       | 51C |       |       |      | CurveFitFailed               |
| BETA-globin   | 51C | 25.93 | 84.07 | 2.01 |                              |
| bla-ACC-1     | 51C |       |       |      | NoAmplification              |
| bla-L1        | 51C | 30.52 | 83.35 | 1.97 | MultipleMeltPeaks            |
| bla1          | 51C |       |       |      | LowEfficiency, CtIsSmall, S: |
| blaCMY        | 51C | 34.46 | 79.98 | 1.94 |                              |
| blaCMY2-01    | 51C | 36.28 | 81.36 | 1.8  |                              |
| blaCMY2-02    | 51C | 30.4  | 85.64 | 1.99 |                              |
| blaCTX-M-01   | 51C |       |       |      | NoAmplification              |
| blaCTX-M-02   | 51C | 33.86 | 80.18 | 1.82 |                              |
| blaCTX-M-03   | 51C |       |       |      | LowEfficiency, CtIsSmall, C: |
| blaCTX-M-04   | 51C | 33.37 | 88.88 | 1.95 | MultipleMeltPeaks            |
| blaCTX-M-05   | 51C | 33.95 | 76.35 | 1.7  |                              |
| blaCTX-M-06   | 51C |       |       |      | NoAmplification              |
| blaGES        | 51C |       |       |      | NoAmplification              |
| blaIMP-01     | 51C |       |       |      | NoAmplification              |
| blaIMP-02     | 51C |       |       |      | CurveFitFailed               |
| blaMOX/blaC   | 51C |       |       |      | LowEfficiency, CtIsSmall, C: |
| blaOCH        | 51C | 32.86 | 89.7  | 1.94 |                              |
| blaOKP        | 51C |       |       |      | NoAmplification              |
| blaOXA1/blaC  | 51C |       |       |      | NoAmplification              |
| blaOXA10-01   | 51C |       |       |      | CurveFitFailed               |
| blaOXA10-02   | 51C |       |       |      | LowEfficiency, CtIsSmall, S: |
| blaOXY        | 51C | 33.56 | 89.92 | 1.8  |                              |
| blaPAO        | 51C |       |       |      | NoAmplification              |
| blaPER        | 51C | 37.65 | 70.38 | 1.65 |                              |
| blaPSE        | 51C |       |       |      | NoAmplification              |
| blaROB        | 51C | 37.66 | 87.22 | 1.76 |                              |
| blaSFO        | 51C | 32.14 | 84.26 | 1.88 | MultipleMeltPeaks            |
| blaSHV-01     | 51C |       |       |      | CurveFitFailed               |
| blaSHV-02     | 51C | 34.45 | 79.89 | 1.98 |                              |
| blaTEM        | 51C |       |       |      | NoAmplification              |
| blaTLA        | 51C |       |       |      | LowEfficiency, CtIsSmall, S: |
| blaVEB        | 51C |       |       |      | CurveFitFailed               |
| blaVIM        | 51C | 36.93 | 61.98 | 2.51 | MultipleMeltPeaks            |
| blaZ          | 51C |       |       |      | LowEfficiency, CtIsSmall, S: |
| carB          | 51C |       |       |      | CurveFitFailed               |
| catA1         | 51C |       |       |      | NoAmplification              |
| catB3         | 51C | 31.97 | 80.38 | 1.97 |                              |
| catB8         | 51C | 29.97 | 82.58 | 1.94 |                              |

|            |     |       |       |      |                              |
|------------|-----|-------|-------|------|------------------------------|
| ceoA       | 51C | 32.18 | 82.4  | 1.98 |                              |
| cepA       | 51C |       |       |      | NoAmplification              |
| cfiA       | 51C | 32.83 | 85.14 | 1.87 |                              |
| cfr        | 51C |       |       |      | LowEfficiency, CtIsSmall, S: |
| cfxA       | 51C | 22.57 | 77.82 | 2.05 |                              |
| cmeA       | 51C | 42.02 | 78.88 | 1.64 |                              |
| cmlA1-01   | 51C | 37.86 | 88.98 | 1.8  | MultipleMeltPeaks            |
| cmlA1-02   | 51C |       |       |      | LowEfficiency, CtIsSmall, S: |
| cmr        | 51C |       |       |      | NoAmplification              |
| cmx(A)     | 51C | 27.78 | 85.44 | 1.97 |                              |
| cphA-01    | 51C | 32.36 | 84.83 | 1.89 | MultipleMeltPeaks            |
| cphA-02    | 51C | 32.71 | 77.89 | 1.97 | MultipleMeltPeaks            |
| dfrA1      | 51C |       |       |      | NoAmplification              |
| dfrA12     | 51C |       |       |      | NoAmplification              |
| emrD       | 51C | 39.06 | 88.88 | 1.63 |                              |
| ereA       | 51C | 32.88 | 82.54 | 1.95 |                              |
| ereB       | 51C |       |       |      | CurveFitFailed               |
| erm(34)    | 51C |       |       |      | NoAmplification              |
| erm(35)    | 51C |       |       |      | LowEfficiency, CtIsSmall, S: |
| erm(36)    | 51C | 29.82 | 86.31 | 2.07 |                              |
| ermA       | 51C | 37.16 | 74.58 | 1.87 |                              |
| ermA/ermTR | 51C |       |       |      | NoAmplification              |
| ermB       | 51C | 22.42 | 75.31 | 2.1  |                              |
| ermC       | 51C |       |       |      | CurveFitFailed               |
| ermF       | 51C | 28.66 | 74.5  | 1.98 |                              |
| ermJ/ermD  | 51C |       |       |      | NoAmplification              |
| ermK-01    | 51C |       |       |      | CurveFitFailed               |
| ermK-02    | 51C |       |       |      | NoAmplification              |
| ermT-01    | 51C |       |       |      | LowEfficiency, CtIsSmall, C: |
| ermT-02    | 51C |       |       |      | LowEfficiency, CtIsSmall, S: |
| ermX       | 51C |       |       |      | CurveFitFailed               |
| ermY       | 51C |       |       |      | LowEfficiency, CtIsSmall, S: |
| fabK       | 51C | 22.1  | 77.72 | 2.12 |                              |
| floR       | 51C | 35.74 | 79.21 | 1.85 | MultipleMeltPeaks            |
| folA       | 51C |       |       |      | NoAmplification              |
| fosB       | 51C |       |       |      | LowEfficiency, CtIsSmall, S: |
| fosX       | 51C |       |       |      | LowEfficiency, CtIsSmall, S: |
| fox5       | 51C | 28.74 | 86.35 | 1.94 |                              |
| imiR       | 51C |       |       |      | CurveFitFailed               |
| ImrA-01    | 51C |       |       |      | NoAmplification              |
| intl       | 51C | 31.96 | 84.73 | 1.96 |                              |
| intl1      | 51C | 21.59 | 87.16 | 2.04 |                              |
| IS613      | 51C | 23.84 | 80.13 | 2.05 |                              |
| lnuA-01    | 51C |       |       |      | LowEfficiency, CtIsSmall, S: |
| lnuB-01    | 51C |       |       |      | LowEfficiency, CtIsSmall, S: |
| lnuB-02    | 51C |       |       |      | LowEfficiency, CtIsSmall, S: |

|               |     |       |       |      |                              |
|---------------|-----|-------|-------|------|------------------------------|
| lnuC          | 51C |       |       |      | CurveFitFailed               |
| marR-01       | 51C | 35.32 | 82.46 | 1.86 | MultipleMeltPeaks            |
| matA/mel      | 51C | 17.21 | 77.89 | 2.06 |                              |
| mdet1         | 51C |       |       |      | NoAmplification              |
| mdtA          | 51C |       |       |      | CurveFitFailed               |
| mdtE/yhiU     | 51C | 33.39 | 87.35 | 1.87 |                              |
| mecA          | 51C |       |       |      | LowEfficiency, CtIsSmall, Ct |
| mefA          | 51C | 16.84 | 80.69 | 1.99 |                              |
| mepA          | 51C | 33.56 | 89.4  | 1.92 |                              |
| mexA          | 51C |       |       |      | CurveFitFailed               |
| mexD          | 51C | 32.4  | 80.54 | 2.03 |                              |
| mexE          | 51C |       |       |      | CurveFitFailed               |
| mexF          | 51C | 27.96 | 82.05 | 1.95 | MultipleMeltPeaks            |
| mphA-01       | 51C | 28.51 | 89.44 | 1.94 |                              |
| mphA-02       | 51C | 34.65 | 76.21 | 1.86 | MultipleMeltPeaks            |
| mphB          | 51C |       |       |      | LowEfficiency, CtIsSmall, S: |
| mphC          | 51C |       |       |      | CurveFitFailed               |
| msrA-01       | 51C |       |       |      | NoAmplification              |
| msrC-01       | 51C |       |       |      | NoAmplification              |
| mtrC-01       | 51C | 37.45 | 82.64 | 1.76 |                              |
| mtrC-02       | 51C |       |       |      | LowEfficiency, CtIsSmall, Ct |
| mtrD-02       | 51C | 27.53 | 81.32 | 2.05 |                              |
| mtrD-03       | 51C | 27.34 | 83.87 | 1.93 | MultipleMeltPeaks            |
| NDM1          | 51C |       |       |      | BadR2, LowEfficiency, CtIsS  |
| nimE          | 51C | 32.93 | 76.44 | 2.02 |                              |
| nisB          | 51C |       |       |      | NoAmplification              |
| oleC          | 51C |       |       |      | CurveFitFailed               |
| oprD          | 51C | 30.36 | 87.17 | 1.98 |                              |
| oprJ          | 51C | 29.54 | 88.4  | 1.93 | MultipleMeltPeaks            |
| pbp           | 51C | 38.29 | 78.08 | 1.92 |                              |
| pbp2x         | 51C | 22.57 | 75.51 | 2.12 |                              |
| Pbp5          | 51C |       |       |      | CurveFitFailed               |
| penA          | 51C | 37.81 | 84.45 | 1.68 |                              |
| pikR1         | 51C | 35.14 | 81.45 | 1.94 |                              |
| pikR2         | 51C | 33.08 | 84.66 | 1.93 |                              |
| pmrA          | 51C | 20.02 | 80.11 | 2.05 |                              |
| pncA          | 51C | 33.92 | 91.22 | 1.62 | MultipleMeltPeaks            |
| putative mult | 51C |       |       |      | NoAmplification              |
| qac           | 51C |       |       |      | LowEfficiency, CtIsSmall, S: |
| qacA          | 51C |       |       |      | NoAmplification              |
| qacA/qacB     | 51C |       |       |      | NoAmplification              |
| qacEdelta1-0  | 51C |       |       |      | NoAmplification              |
| qacEdelta1-0  | 51C |       |       |      | CurveFitFailed               |
| qacH-01       | 51C | 32.04 | 87.99 | 1.9  |                              |
| qacH-02       | 51C | 43.23 | 83.65 | 1.55 | MultipleMeltPeaks            |
| qnrA          | 51C |       |       |      | NoAmplification              |

|              |     |       |       |      |                                          |
|--------------|-----|-------|-------|------|------------------------------------------|
| rarD-02      | 51C |       |       |      | CurveFitFailed                           |
| sat4         | 51C |       |       |      | NoAmplification                          |
| sdeB         | 51C |       |       |      | LowEfficiency, CtIsSmall, S <sub>e</sub> |
| spcN-01      | 51C |       |       |      | NoAmplification                          |
| speA         | 51C |       |       |      | NoAmplification                          |
| str          | 51C |       |       |      | LowEfficiency, CtIsSmall, S <sub>e</sub> |
| strA         | 51C |       |       |      | CurveFitFailed                           |
| strB         | 51C |       |       |      | CurveFitFailed                           |
| sul1         | 51C | 40.38 | 86.48 | 1.53 | MultipleMeltPeaks                        |
| sul2         | 51C | 30.39 | 75.27 | 1.66 |                                          |
| sulA/foIP-01 | 51C | 18.76 | 81.3  | 1.97 | MultipleMeltPeaks                        |
| sulA/foIP-03 | 51C | 19.68 | 83.63 | 1.96 |                                          |
| tet(32)      | 51C | 27.53 | 81.02 | 1.89 |                                          |
| tet(34)      | 51C | 30.23 | 76.15 | 2.01 |                                          |
| tet(35)      | 51C |       |       |      | NoAmplification                          |
| tet(36)-A    | 51C |       |       |      | LowEfficiency, CtIsSmall, S <sub>e</sub> |
| tet(36)-B    | 51C |       |       |      | LowEfficiency, CtIsSmall, S <sub>e</sub> |
| tet(37)      | 51C | 23.97 | 76.7  | 1.99 |                                          |
| tetA-01      | 51C |       |       |      | NoAmplification                          |
| tetA-02      | 51C |       |       |      | CurveFitFailed                           |
| tetB-01      | 51C | 37.08 | 86.3  | 1.78 |                                          |
| tetB-02      | 51C | 40.24 | 74.67 | 1.83 |                                          |
| tetC-01      | 51C |       |       |      | NoAmplification                          |
| tetC-02      | 51C |       |       |      | LowEfficiency, CtIsSmall, C <sub>i</sub> |
| tetD-01      | 51C |       |       |      | NoAmplification                          |
| tetD-02      | 51C |       |       |      | NoAmplification                          |
| tetE         | 51C |       |       |      | NoAmplification                          |
| tetG-01      | 51C |       |       |      | CurveFitFailed                           |
| tetG-02      | 51C | 39.85 | 78.21 | 1.68 |                                          |
| tetH         | 51C |       |       |      | LowEfficiency, CtIsSmall, S <sub>e</sub> |
| tetJ         | 51C |       |       |      | LowEfficiency, CtIsSmall, S <sub>e</sub> |
| tetK         | 51C |       |       |      | LowEfficiency, CtIsSmall, S <sub>e</sub> |
| tetL-01      | 51C |       |       |      | LowEfficiency, CtIsSmall, S <sub>e</sub> |
| tetL-02      | 51C | 36.64 | 85.55 | 1.68 |                                          |
| tetM-01      | 51C | 20.93 | 76.18 | 2    |                                          |
| tetM-02      | 51C | 21.54 | 77.46 | 1.99 |                                          |
| tetO-01      | 51C | 22.1  | 77    | 1.99 |                                          |
| tetPA        | 51C |       |       |      | NoAmplification                          |
| tetPB-01     | 51C | 38.5  | 84.31 | 1.88 |                                          |
| tetPB-02     | 51C | 30.82 | 84.73 | 2.01 |                                          |
| tetPB-03     | 51C |       |       |      | CurveFitFailed                           |
| tetPB-05     | 51C |       |       |      | LowEfficiency, CtIsSmall, S <sub>e</sub> |
| tetQ         | 51C | 23.3  | 77.32 | 2    |                                          |
| tetR-02      | 51C | 31.63 | 84.52 | 1.88 | MultipleMeltPeaks                        |
| tetR-03      | 51C |       |       |      | LowEfficiency, CtIsSmall, S <sub>e</sub> |
| tetS         | 51C |       |       |      | CurveFitFailed                           |

|             |     |       |       |      |                              |
|-------------|-----|-------|-------|------|------------------------------|
| tetT        | 51C |       |       |      | LowEfficiency, CtIsSmall, S: |
| tetU-01     | 51C |       |       |      | CurveFitFailed               |
| tetV        | 51C |       |       |      | CurveFitFailed               |
| tetW-01     | 51C | 22.72 | 81.72 | 1.99 |                              |
| tetX        | 51C |       |       |      | CurveFitFailed               |
| tnpA-01     | 51C |       |       |      | CurveFitFailed               |
| tnpA-02     | 51C |       |       |      | NoAmplification              |
| tnpA-03     | 51C | 31.23 | 75.6  | 2.17 |                              |
| tnpA-04     | 51C | 29.39 | 82.36 | 1.92 |                              |
| tnpA-05     | 51C | 34.68 | 83.58 | 1.75 |                              |
| tnpA-07     | 51C |       |       |      | NoAmplification              |
| tolC-01     | 51C |       |       |      | CurveFitFailed               |
| tolC-02     | 51C | 33.73 | 83.95 | 1.97 | MultipleMeltPeaks            |
| tolC-03     | 51C | 33.67 | 86.88 | 1.97 |                              |
| Tp614       | 51C |       |       |      | CurveFitFailed               |
| ttgA        | 51C | 37.88 | 75.46 | 1.9  | MultipleMeltPeaks            |
| ttgB        | 51C | 33.97 | 84.88 | 1.93 |                              |
| vanA        | 51C |       |       |      | NoAmplification              |
| vanB-01     | 51C | 31.8  | 83.61 | 1.99 | MultipleMeltPeaks            |
| vanC-01     | 51C |       |       |      | NoAmplification              |
| vanC-02     | 51C |       |       |      | LowEfficiency, CtIsSmall, Ci |
| vanC-03     | 51C | 29.24 | 85.91 | 1.97 |                              |
| vanC1       | 51C |       |       |      | LowEfficiency, CtIsSmall, S: |
| vanC2/vanC3 | 51C | 36.56 | 80.26 | 1.85 | MultipleMeltPeaks            |
| vanG        | 51C |       |       |      | LowEfficiency, CtIsSmall, Ci |
| vanHB       | 51C | 35.71 | 82.79 | 1.85 |                              |
| vanHD       | 51C |       |       |      | CurveFitFailed               |
| vanRA-01    | 51C |       |       |      | LowEfficiency, CtIsSmall, S: |
| vanRA-02    | 51C |       |       |      | LowEfficiency, CtIsSmall, S: |
| vanRB       | 51C | 36.06 | 85.85 | 1.85 |                              |
| vanRC       | 51C |       |       |      | LowEfficiency, CtIsSmall, S: |
| vanRC4      | 51C |       |       |      | CurveFitFailed               |
| vanRD       | 51C |       |       |      | NoAmplification              |
| vanSA       | 51C |       |       |      | LowEfficiency, CtIsSmall, S: |
| vanSB       | 51C | 30.69 | 74.79 | 2.05 |                              |
| vanSC-01    | 51C | 29.76 | 77.28 | 1.99 | MultipleMeltPeaks            |
| vanSC-02    | 51C |       |       |      | NoAmplification              |
| vanTC-01    | 51C |       |       |      | LowEfficiency, CtIsSmall, Ci |
| vanTC-02    | 51C | 33.32 | 83.15 | 1.9  | MultipleMeltPeaks            |
| vanTE       | 51C |       |       |      | NoAmplification              |
| vanTG       | 51C |       |       |      | NoAmplification              |
| vanWB       | 51C |       |       |      | NoAmplification              |
| vanWG       | 51C | 31.88 | 75.28 | 1.98 |                              |
| vanXA       | 51C |       |       |      | NoAmplification              |
| vanXB       | 51C |       |       |      | NoAmplification              |
| vanXD       | 51C | 30.31 | 75.5  | 2.02 |                              |

|              |     |       |       |      |                              |
|--------------|-----|-------|-------|------|------------------------------|
| vanYB        | 51C |       |       |      | CurveFitFailed               |
| vanYD-01     | 51C | 34.88 | 88.68 | 1.79 |                              |
| vanYD-02     | 51C |       |       |      | CtIsLarge, CurveFitFailed    |
| vatB-01      | 51C |       |       |      | NoAmplification              |
| vatB-02      | 51C |       |       |      | CurveFitFailed               |
| vatC-01      | 51C |       |       |      | LowEfficiency, CtIsSmall, Ct |
| vatC-02      | 51C |       |       |      | CurveFitFailed               |
| vatE-01      | 51C | 30.65 | 77.1  | 2.14 |                              |
| vatE-02      | 51C |       |       |      | NoAmplification              |
| vgaA-01      | 51C |       |       |      | LowEfficiency, CtIsSmall, S: |
| vgaA-02      | 51C |       |       |      | NoAmplification              |
| vgb-01       | 51C | 34.4  | 83.28 | 1.88 |                              |
| vgbB-01      | 51C |       |       |      | NoAmplification              |
| vgbB-02      | 51C |       |       |      | NoAmplification              |
| yceE/mdtG-0  | 51C |       |       |      | NoAmplification              |
| yceE/mdtG-0  | 51C |       |       |      | NoAmplification              |
| yceL/mdtH-0  | 51C | 27.87 | 76.6  | 2.01 | MultipleMeltPeaks            |
| yceL/mdtH-0  | 51C |       |       |      | NoAmplification              |
| yceL/mdtH-0  | 51C |       |       |      | LowEfficiency, CtIsSmall, S: |
| yidY/mdtL-01 | 51C | 34.46 | 82.84 | 1.63 |                              |
| yidY/mdtL-02 | 51C |       |       |      | CurveFitFailed               |































| Assay          | Sample | Ct | Tm    | Efficiency | flag                   |
|----------------|--------|----|-------|------------|------------------------|
| 16S rRNA       | 52A    |    | 13.07 | 82.48      | 2                      |
| aac            | 52A    |    | 31.5  | 88.52      | 1.89                   |
| aac(6')-Ib(akz | 52A    |    |       |            | CurveFitFailed         |
| aac(6')-Ib(akz | 52A    |    | 33.93 | 82.34      | 1.91                   |
| aac(6')-Ib(akz | 52A    |    | 35.69 | 76.39      | 1.87                   |
| aac(6')-II     | 52A    |    | 33.76 | 77.52      | 1.92                   |
| aac(6')I1      | 52A    |    | 37.61 | 85.3       | 1.54                   |
| aacA/aphD      | 52A    |    |       |            | NoAmplification        |
| aacC           | 52A    |    | 32.86 | 87.24      | 1.84 MultipleMeltPeaks |
| aacC1          | 52A    |    |       |            | NoAmplification        |
| aacC2          | 52A    |    | 31.07 | 83.5       | 1.91                   |
| aacC4          | 52A    |    | 34.5  | 87.34      | 1.79 MultipleMeltPeaks |
| aadA-01        | 52A    |    |       |            | CurveFitFailed         |
| aadA-02        | 52A    |    | 37.29 | 80.71      | 1.84                   |
| aadA-1-01      | 52A    |    | 35.52 | 81.11      | 1.82                   |
| aadA-1-02      | 52A    |    |       |            | CurveFitFailed         |
| aadA1          | 52A    |    | 39.32 | 83.98      | 1.83 MultipleMeltPeaks |
| aadA2-01       | 52A    |    | 31.64 | 90.72      | 1.8                    |
| aadA2-02       | 52A    |    | 32.38 | 75.52      | 2.01                   |
| aadA2-03       | 52A    |    | 40.06 | 83.09      | 1.77 MultipleMeltPeaks |
| aadA5-01       | 52A    |    | 37.69 | 83.4       | 1.71 MultipleMeltPeaks |
| aadA5-02       | 52A    |    | 34.22 | 77.61      | 1.95 MultipleMeltPeaks |
| aadA9-01       | 52A    |    |       |            | CurveFitFailed         |
| aadA9-02       | 52A    |    | 35.25 | 73.47      | 1.92                   |
| aadD           | 52A    |    |       |            | NoAmplification        |
| aadE           | 52A    |    |       |            | NoAmplification        |
| acrA-01        | 52A    |    | 34.51 | 84.7       | 1.87                   |
| acrA-02        | 52A    |    |       |            | CurveFitFailed         |
| acrA-03        | 52A    |    |       |            | CurveFitFailed         |
| acrA-04        | 52A    |    | 30.7  | 80.52      | 1.99                   |
| acrA-05        | 52A    |    | 28.81 | 87.8       | 1.97                   |
| acrB-01        | 52A    |    | 32.63 | 77.18      | 2.03                   |
| acrF           | 52A    |    | 33.08 | 79.12      | 1.96 MultipleMeltPeaks |
| acrR-01        | 52A    |    | 37.93 | 81.27      | 1.85 MultipleMeltPeaks |
| acrR-02        | 52A    |    |       |            | CurveFitFailed         |
| Actin          | 52A    |    | 24.37 | 87.06      | 1.93 MultipleMeltPeaks |
| adeA           | 52A    |    |       |            | NoAmplification        |
| ampC-01        | 52A    |    | 29.13 | 80.52      | 1.98 MultipleMeltPeaks |
| ampC-02        | 52A    |    | 35.69 | 88.89      | 1.86                   |
| ampC-04        | 52A    |    | 32.4  | 78.74      | 1.77                   |
| ampC-05        | 52A    |    |       |            | NoAmplification        |
| ampC-06        | 52A    |    | 37.17 | 78.36      | 1.84                   |
| ampC-07        | 52A    |    | 43.64 | 88.22      | 1.62 MultipleMeltPeaks |
| ampC-09        | 52A    |    | 30.71 | 87.07      | 1.88                   |
| ampC/blaDH     | 52A    |    | 29.33 | 84.78      | 1.93                   |

|                          |     |       |       |      |                              |
|--------------------------|-----|-------|-------|------|------------------------------|
| aph                      | 52A |       |       |      | LowEfficiency, CtIsSmall, S: |
| aph(2')-Id-01            | 52A |       |       |      | CurveFitFailed               |
| aph(2')-Id-02            | 52A |       |       |      | LowEfficiency, CtIsSmall, S: |
| aph6ia                   | 52A | 27.55 | 78.49 | 1.97 |                              |
| aphA1(aka k <sub>a</sub> | 52A |       |       |      | LowEfficiency, CtIsSmall, S: |
| bacA-01                  | 52A | 31.87 | 83.7  | 1.93 |                              |
| bacA-02                  | 52A |       |       |      | CurveFitFailed               |
| BETA-globin              | 52A | 24.58 | 83.94 | 1.99 | MultipleMeltPeaks            |
| bla-ACC-1                | 52A | 39.8  | 85.93 | 1.74 | MultipleMeltPeaks            |
| bla-L1                   | 52A | 30.67 | 84.04 | 1.91 | MultipleMeltPeaks            |
| bla1                     | 52A |       |       |      | LowEfficiency, CtIsSmall, S: |
| blaCMY                   | 52A | 32.07 | 79.93 | 1.89 |                              |
| blaCMY2-01               | 52A | 35.41 | 75.24 | 1.97 |                              |
| blaCMY2-02               | 52A | 32.54 | 85.49 | 2.01 | MultipleMeltPeaks            |
| blaCTX-M-01              | 52A | 36.69 | 76.83 | 2.17 |                              |
| blaCTX-M-02              | 52A | 35.94 | 79.76 | 1.8  |                              |
| blaCTX-M-03              | 52A |       |       |      | CurveFitFailed               |
| blaCTX-M-04              | 52A | 31.84 | 88.06 | 1.97 |                              |
| blaCTX-M-05              | 52A | 32.95 | 76.65 | 1.77 |                              |
| blaCTX-M-06              | 52A |       |       |      | NoAmplification              |
| blaGES                   | 52A |       |       |      | NoAmplification              |
| blaIMP-01                | 52A |       |       |      | LowEfficiency, CtIsSmall, C: |
| blaIMP-02                | 52A |       |       |      | LowEfficiency, CtIsSmall, S: |
| blaMOX/blaC              | 52A |       |       |      | NoAmplification              |
| blaOCH                   | 52A | 30.23 | 85.48 | 1.93 |                              |
| blaOKP                   | 52A |       |       |      | NoAmplification              |
| blaOXA1/blaC             | 52A |       |       |      | LowEfficiency, CtIsSmall, C: |
| blaOXA10-01              | 52A |       |       |      | NoAmplification              |
| blaOXA10-02              | 52A | 37.6  | 80.2  | 2.01 |                              |
| blaOXY                   | 52A | 33.89 | 89.71 | 1.77 |                              |
| blaPAO                   | 52A |       |       |      | NoAmplification              |
| blaPER                   | 52A | 36.45 | 70.22 | 1.7  |                              |
| blaPSE                   | 52A |       |       |      | CurveFitFailed               |
| blaROB                   | 52A | 36.66 | 81.91 | 1.83 |                              |
| blaSFO                   | 52A | 29.71 | 87.22 | 1.88 |                              |
| blaSHV-01                | 52A |       |       |      | CurveFitFailed               |
| blaSHV-02                | 52A |       |       |      | CurveFitFailed               |
| blaTEM                   | 52A | 30.07 | 79.53 | 2.02 |                              |
| blaTLA                   | 52A |       |       |      | LowEfficiency, CtIsSmall, S: |
| blaVEB                   | 52A |       |       |      | LowEfficiency, CtIsSmall, S: |
| blaVIM                   | 52A |       |       |      | NoAmplification              |
| blaZ                     | 52A |       |       |      | LowEfficiency, CtIsSmall, S: |
| carB                     | 52A |       |       |      | LowEfficiency, CtIsSmall, S: |
| catA1                    | 52A |       |       |      | NoAmplification              |
| catB3                    | 52A | 34.55 | 87.58 | 1.85 |                              |
| catB8                    | 52A | 28.84 | 82.18 | 1.94 |                              |

|            |     |       |       |      |                              |
|------------|-----|-------|-------|------|------------------------------|
| ceoA       | 52A | 30.22 | 82.44 | 1.93 |                              |
| cepA       | 52A |       |       |      | NoAmplification              |
| cfiA       | 52A | 32.22 | 84.75 | 1.9  |                              |
| cfr        | 52A |       |       |      | CurveFitFailed               |
| cfxA       | 52A | 23.58 | 77.67 | 2.05 |                              |
| cmeA       | 52A |       |       |      | LowEfficiency, CtIsSmall, S: |
| cmlA1-01   | 52A | 30.89 | 89.65 | 1.9  |                              |
| cmlA1-02   | 52A |       |       |      | CurveFitFailed               |
| cmr        | 52A |       |       |      | CurveFitFailed               |
| cmx(A)     | 52A | 28.43 | 86.79 | 2.02 |                              |
| cphA-01    | 52A | 30.55 | 88.35 | 1.93 |                              |
| cphA-02    | 52A | 34.88 | 82.89 | 1.88 |                              |
| dfrA1      | 52A |       |       |      | NoAmplification              |
| dfrA12     | 52A | 35.06 | 85.93 | 1.72 |                              |
| emrD       | 52A | 31.39 | 90.74 | 1.87 |                              |
| ereA       | 52A |       |       |      | CurveFitFailed               |
| ereB       | 52A |       |       |      | CurveFitFailed               |
| erm(34)    | 52A |       |       |      | NoAmplification              |
| erm(35)    | 52A |       |       |      | NoAmplification              |
| erm(36)    | 52A | 35    | 81.19 | 1.84 |                              |
| ermA       | 52A |       |       |      | LowEfficiency, CtIsSmall, S: |
| ermA/ermTR | 52A | 39.29 | 79.47 | 1.81 |                              |
| ermB       | 52A | 26.73 | 75.11 | 2.08 |                              |
| ermC       | 52A | 37.65 | 79.14 | 1.88 |                              |
| ermF       | 52A |       |       |      | LowEfficiency, CtIsSmall, S: |
| ermJ/ermD  | 52A |       |       |      | CurveFitFailed               |
| ermK-01    | 52A |       |       |      | CurveFitFailed               |
| ermK-02    | 52A |       |       |      | NoAmplification              |
| ermT-01    | 52A |       |       |      | LowEfficiency, CtIsSmall, C: |
| ermT-02    | 52A |       |       |      | CurveFitFailed               |
| ermX       | 52A |       |       |      | CurveFitFailed               |
| ermY       | 52A |       |       |      | LowEfficiency, CtIsSmall, S: |
| fabK       | 52A | 20.34 | 78.64 | 2.15 |                              |
| floR       | 52A | 36.27 | 78.26 | 1.68 |                              |
| folA       | 52A |       |       |      | NoAmplification              |
| fosB       | 52A |       |       |      | LowEfficiency, CtIsSmall, S: |
| fosX       | 52A |       |       |      | LowEfficiency, CtIsSmall, S: |
| fox5       | 52A | 24.15 | 86.25 | 1.93 |                              |
| imiR       | 52A |       |       |      | CurveFitFailed               |
| lmrA-01    | 52A | 32.46 | 82.85 | 1.96 |                              |
| intl       | 52A | 31.12 | 85.09 | 1.96 |                              |
| intl1      | 52A | 20.86 | 87.82 | 2.06 |                              |
| IS613      | 52A |       |       |      | CurveFitFailed               |
| lnuA-01    | 52A |       |       |      | LowEfficiency, CtIsSmall, S: |
| lnuB-01    | 52A |       |       |      | LowEfficiency, CtIsSmall, S: |
| lnuB-02    | 52A |       |       |      | LowEfficiency, CtIsSmall, S: |

|               |     |       |       |      |                              |
|---------------|-----|-------|-------|------|------------------------------|
| lnuC          | 52A | 37.32 | 84.21 | 1.71 |                              |
| marR-01       | 52A | 35.77 | 85.22 | 1.81 |                              |
| matA/mel      | 52A | 14.89 | 77.86 | 2.11 |                              |
| mdet1         | 52A |       |       |      | LowEfficiency, CtIsSmall, S: |
| mdtA          | 52A | 36.2  | 80.75 | 1.77 | MultipleMeltPeaks            |
| mdtE/yhiU     | 52A | 36.48 | 91.32 | 1.73 |                              |
| mecA          | 52A |       |       |      | CurveFitFailed               |
| mefA          | 52A | 14.63 | 80.62 | 2.02 | MultipleMeltPeaks            |
| mepA          | 52A | 31.95 | 77.13 | 1.72 |                              |
| mexA          | 52A |       |       |      | LowEfficiency, CtIsSmall, Ci |
| mexD          | 52A | 33.47 | 80.19 | 2.02 |                              |
| mexE          | 52A |       |       |      | CurveFitFailed               |
| mexF          | 52A | 30.63 | 90.69 | 1.99 | MultipleMeltPeaks            |
| mphA-01       | 52A | 31.95 | 89.25 | 1.9  |                              |
| mphA-02       | 52A | 29.18 | 90.31 | 1.92 |                              |
| mphB          | 52A | 34.88 | 88.76 | 1.85 |                              |
| mphC          | 52A |       |       |      | LowEfficiency, CtIsSmall, Ci |
| msrA-01       | 52A |       |       |      | LowEfficiency, CtIsSmall, S: |
| msrC-01       | 52A |       |       |      | NoAmplification              |
| mtrC-01       | 52A |       |       |      | CurveFitFailed               |
| mtrC-02       | 52A | 40.65 | 76.89 | 1.7  | MultipleMeltPeaks            |
| mtrD-02       | 52A | 26.7  | 81.23 | 2.05 | MultipleMeltPeaks            |
| mtrD-03       | 52A | 25.29 | 81.99 | 1.93 | MultipleMeltPeaks            |
| NDM1          | 52A |       |       |      | LowEfficiency, CtIsSmall, S: |
| nimE          | 52A |       |       |      | LowEfficiency, CtIsSmall, S: |
| nisB          | 52A |       |       |      | NoAmplification              |
| oleC          | 52A | 31.29 | 89.18 | 1.87 |                              |
| oprD          | 52A | 29.91 | 88    | 1.94 |                              |
| oprJ          | 52A | 27.54 | 88.15 | 2.01 |                              |
| pbp           | 52A | 37.62 | 81.44 | 1.79 |                              |
| pbp2x         | 52A | 17.63 | 76.13 | 2.11 |                              |
| Pbp5          | 52A |       |       |      | LowEfficiency, CtIsSmall, Ci |
| penA          | 52A | 37.44 | 80    | 1.67 |                              |
| pikR1         | 52A | 34.54 | 89.2  | 1.91 | MultipleMeltPeaks            |
| pikR2         | 52A | 33.77 | 82.66 | 1.8  | MultipleMeltPeaks            |
| pmrA          | 52A | 17.81 | 79.82 | 2.07 |                              |
| pncA          | 52A | 34.26 | 89.4  | 1.54 |                              |
| putative mult | 52A |       |       |      | LowEfficiency, CtIsSmall, S: |
| qac           | 52A |       |       |      | LowEfficiency, CtIsSmall, S: |
| qacA          | 52A | 37.91 | 70.4  | 1.81 |                              |
| qacA/qacB     | 52A |       |       |      | NoAmplification              |
| qacEdelta1-0  | 52A |       |       |      | CurveFitFailed               |
| qacEdelta1-0  | 52A | 31.48 | 90.8  | 1.94 | MultipleMeltPeaks            |
| qacH-01       | 52A | 28.16 | 90    | 1.92 | MultipleMeltPeaks            |
| qacH-02       | 52A | 37.33 | 84.28 | 1.73 |                              |
| qnrA          | 52A |       |       |      | NoAmplification              |



|              |     |       |       |      |                              |
|--------------|-----|-------|-------|------|------------------------------|
| rarD-02      | 52A |       |       |      | NoAmplification              |
| sat4         | 52A | 37.54 | 80.17 | 1.54 |                              |
| sdeB         | 52A |       |       |      | LowEfficiency, CtIsSmall, S: |
| spcN-01      | 52A |       |       |      | NoAmplification              |
| speA         | 52A |       |       |      | NoAmplification              |
| str          | 52A |       |       |      | LowEfficiency, CtIsSmall, Ct |
| strA         | 52A |       |       |      | CurveFitFailed               |
| strB         | 52A | 39.38 | 79.8  | 1.93 | MultipleMeltPeaks            |
| sul1         | 52A |       |       |      | NoAmplification              |
| sul2         | 52A | 29.47 | 75.39 | 1.73 |                              |
| sulA/foIP-01 | 52A | 15.79 | 80.99 | 2.01 |                              |
| sulA/foIP-03 | 52A | 16.92 | 82.53 | 2    |                              |
| tet(32)      | 52A | 27.43 | 81.04 | 1.98 |                              |
| tet(34)      | 52A | 32    | 75.63 | 2    |                              |
| tet(35)      | 52A | 36.63 | 75.65 | 1.92 |                              |
| tet(36)-A    | 52A |       |       |      | LowEfficiency, CtIsSmall, S: |
| tet(36)-B    | 52A |       |       |      | LowEfficiency, CtIsSmall, S: |
| tet(37)      | 52A | 23.88 | 76.52 | 1.99 |                              |
| tetA-01      | 52A | 33.41 | 85.14 | 1.95 |                              |
| tetA-02      | 52A | 35.16 | 72.28 | 1.8  | MultipleMeltPeaks            |
| tetB-01      | 52A | 34.19 | 79.73 | 1.93 | MultipleMeltPeaks            |
| tetB-02      | 52A | 35.59 | 81.66 | 1.87 |                              |
| tetC-01      | 52A |       |       |      | NoAmplification              |
| tetC-02      | 52A |       |       |      | LowEfficiency, CtIsSmall, S: |
| tetD-01      | 52A |       |       |      | CurveFitFailed               |
| tetD-02      | 52A |       |       |      | NoAmplification              |
| tetE         | 52A |       |       |      | NoAmplification              |
| tetG-01      | 52A | 42.34 | 89.79 | 1.68 | MultipleMeltPeaks            |
| tetG-02      | 52A |       |       |      | CurveFitFailed               |
| tetH         | 52A |       |       |      | NoAmplification              |
| tetJ         | 52A |       |       |      | CurveFitFailed               |
| tetK         | 52A |       |       |      | LowEfficiency, CtIsSmall, S: |
| tetL-01      | 52A |       |       |      | CurveFitFailed               |
| tetL-02      | 52A |       |       |      | LowEfficiency, CtIsSmall, S: |
| tetM-01      | 52A | 17.35 | 75.92 | 2.05 |                              |
| tetM-02      | 52A | 18.86 | 77.44 | 1.99 |                              |
| tetO-01      | 52A | 20.25 | 77.17 | 2.02 |                              |
| tetPA        | 52A |       |       |      | NoAmplification              |
| tetPB-01     | 52A |       |       |      | CurveFitFailed               |
| tetPB-02     | 52A | 29.2  | 84.91 | 1.96 |                              |
| tetPB-03     | 52A |       |       |      | CurveFitFailed               |
| tetPB-05     | 52A |       |       |      | LowEfficiency, CtIsSmall, S: |
| tetQ         | 52A | 25.74 | 76.11 | 2.01 |                              |
| tetR-02      | 52A | 30.85 | 90.73 | 1.9  |                              |
| tetR-03      | 52A |       |       |      | NoAmplification              |
| tetS         | 52A |       |       |      | NoAmplification              |

|             |     |       |       |      |                             |
|-------------|-----|-------|-------|------|-----------------------------|
| tetT        | 52A | 38.35 | 72.46 | 1.8  |                             |
| tetU-01     | 52A |       |       |      | CurveFitFailed              |
| tetV        | 52A |       |       |      | CurveFitFailed              |
| tetW-01     | 52A | 22.22 | 82.09 | 1.97 |                             |
| tetX        | 52A |       |       |      | BadR2, CtIsSmall, CurveFit  |
| tnpA-01     | 52A |       |       |      | CurveFitFailed              |
| tnpA-02     | 52A |       |       |      | CurveFitFailed              |
| tnpA-03     | 52A | 17.31 | 77.61 | 2.09 |                             |
| tnpA-04     | 52A |       |       |      | CurveFitFailed              |
| tnpA-05     | 52A |       |       |      | LowEfficiency, CtIsSmall, S |
| tnpA-07     | 52A |       |       |      | LowEfficiency, CtIsSmall, S |
| tolC-01     | 52A |       |       |      | NoAmplification             |
| tolC-02     | 52A | 31.03 | 85.42 | 1.95 | MultipleMeltPeaks           |
| tolC-03     | 52A | 30.54 | 88.8  | 1.97 |                             |
| Tp614       | 52A | 36.1  | 73.21 | 1.86 | MultipleMeltPeaks           |
| ttgA        | 52A |       |       |      | BadR2, LowEfficiency, CtIs  |
| ttgB        | 52A |       |       |      | LowEfficiency, CtIsSmall, C |
| vanA        | 52A |       |       |      | NoAmplification             |
| vanB-01     | 52A | 35.01 | 77.3  | 1.88 |                             |
| vanC-01     | 52A |       |       |      | LowEfficiency, CtIsSmall, C |
| vanC-02     | 52A |       |       |      | CurveFitFailed              |
| vanC-03     | 52A | 26.03 | 91.2  | 1.94 | MultipleMeltPeaks           |
| vanC1       | 52A |       |       |      | CurveFitFailed              |
| vanC2/vanC3 | 52A | 30.85 | 84.62 | 2.05 |                             |
| vanG        | 52A |       |       |      | CurveFitFailed              |
| vanHB       | 52A | 37.09 | 61.64 | 2.04 | MultipleMeltPeaks           |
| vanHD       | 52A |       |       |      | CurveFitFailed              |
| vanRA-01    | 52A |       |       |      | NoAmplification             |
| vanRA-02    | 52A |       |       |      | NoAmplification             |
| vanRB       | 52A | 33.06 | 87.67 | 2.01 |                             |
| vanRC       | 52A |       |       |      | CurveFitFailed              |
| vanRC4      | 52A |       |       |      | CurveFitFailed              |
| vanRD       | 52A |       |       |      | BadR2, CtIsSmall, Saturatio |
| vanSA       | 52A |       |       |      | CurveFitFailed              |
| vanSB       | 52A | 30.91 | 74.87 | 2.09 |                             |
| vanSC-01    | 52A | 30.68 | 77.42 | 2.06 |                             |
| vanSC-02    | 52A |       |       |      | NoAmplification             |
| vanTC-01    | 52A |       |       |      | LowEfficiency, CtIsSmall, C |
| vanTC-02    | 52A | 37.51 | 82.7  | 1.73 |                             |
| vanTE       | 52A | 34.48 | 77.26 | 2.04 |                             |
| vanTG       | 52A |       |       |      | CurveFitFailed              |
| vanWB       | 52A |       |       |      | LowEfficiency, CtIsSmall, C |
| vanWG       | 52A | 44.66 | 74.24 | 1.97 |                             |
| vanXA       | 52A |       |       |      | NoAmplification             |
| vanXB       | 52A |       |       |      | NoAmplification             |
| vanXD       | 52A | 29.65 | 75.62 | 2.02 |                             |

|              |     |       |       |      |                              |
|--------------|-----|-------|-------|------|------------------------------|
| vanYB        | 52A |       |       |      | NoAmplification              |
| vanYD-01     | 52A | 32.49 | 89.27 | 1.83 |                              |
| vanYD-02     | 52A |       |       |      | CurveFitFailed               |
| vatB-01      | 52A |       |       |      | LowEfficiency, CtIsSmall, S: |
| vatB-02      | 52A |       |       |      | LowEfficiency, CtIsSmall, Ci |
| vatC-01      | 52A | 32.56 | 73.9  | 1.99 |                              |
| vatC-02      | 52A | 36.53 | 86.28 | 1.85 |                              |
| vatE-01      | 52A | 29.61 | 79    | 2.13 | MultipleMeltPeaks            |
| vatE-02      | 52A |       |       |      | NoAmplification              |
| vgaA-01      | 52A |       |       |      | LowEfficiency, CtIsSmall, S: |
| vgaA-02      | 52A |       |       |      | CurveFitFailed               |
| vgb-01       | 52A | 35.03 | 83.47 | 1.85 |                              |
| vgbB-01      | 52A |       |       |      | NoAmplification              |
| vgbB-02      | 52A |       |       |      | CurveFitFailed               |
| yceE/mdtG-0  | 52A |       |       |      | CurveFitFailed               |
| yceE/mdtG-0  | 52A |       |       |      | NoAmplification              |
| yceL/mdtH-0  | 52A | 25.82 | 76.92 | 2.01 |                              |
| yceL/mdtH-0  | 52A |       |       |      | LowEfficiency, CtIsSmall, S: |
| yceL/mdtH-0  | 52A | 34.01 | 89.21 | 1.79 | MultipleMeltPeaks            |
| yidY/mdtL-01 | 52A | 36.9  | 81.4  | 1.81 |                              |
| yidY/mdtL-02 | 52A |       |       |      | CurveFitFailed               |































| Assay          | Sample | Ct | Tm    | Efficiency | flag                         |
|----------------|--------|----|-------|------------|------------------------------|
| 16S rRNA       | 52B    |    | 14.92 | 82.44      | 2.02                         |
| aac            | 52B    |    | 30.52 | 80.51      | 1.93 MultipleMeltPeaks       |
| aac(6')-Ib(akz | 52B    |    |       |            | LowEfficiency, CtIsSmall, S: |
| aac(6')-Ib(akz | 52B    |    | 30.5  | 83.2       | 1.95                         |
| aac(6')-Ib(akz | 52B    |    | 32.41 | 87.15      | 1.94 MultipleMeltPeaks       |
| aac(6')-II     | 52B    |    | 34.37 | 83.92      | 1.82 MultipleMeltPeaks       |
| aac(6')I1      | 52B    |    |       |            | CurveFitFailed               |
| aacA/aphD      | 52B    |    |       |            | CurveFitFailed               |
| aacC           | 52B    |    | 29.97 | 88.35      | 1.89                         |
| aacC1          | 52B    |    |       |            | LowEfficiency, CtIsSmall, S: |
| aacC2          | 52B    |    |       |            | LowEfficiency, CtIsSmall, C: |
| aacC4          | 52B    |    | 37.12 | 83.8       | 1.7 MultipleMeltPeaks        |
| aadA-01        | 52B    |    | 26.96 | 82.13      | 1.98                         |
| aadA-02        | 52B    |    | 26.43 | 82.49      | 1.97                         |
| aadA-1-01      | 52B    |    |       |            | NoAmplification              |
| aadA-1-02      | 52B    |    |       |            | CurveFitFailed               |
| aadA1          | 52B    |    | 27.38 | 79.61      | 2.03                         |
| aadA2-01       | 52B    |    |       |            | CurveFitFailed               |
| aadA2-02       | 52B    |    | 31.71 | 75.45      | 2.1                          |
| aadA2-03       | 52B    |    | 28.47 | 80.85      | 1.96                         |
| aadA5-01       | 52B    |    | 33.36 | 88.64      | 1.82                         |
| aadA5-02       | 52B    |    | 37.33 | 83.73      | 1.71                         |
| aadA9-01       | 52B    |    | 36.5  | 75.83      | 1.91 MultipleMeltPeaks       |
| aadA9-02       | 52B    |    |       |            | LowEfficiency, CtIsSmall, S: |
| aadD           | 52B    |    |       |            | LowEfficiency, CtIsSmall, S: |
| aadE           | 52B    |    | 37.93 | 73.27      | 1.83                         |
| acrA-01        | 52B    |    | 34.87 | 88.7       | 1.84                         |
| acrA-02        | 52B    |    |       |            | CurveFitFailed               |
| acrA-03        | 52B    |    |       |            | CurveFitFailed               |
| acrA-04        | 52B    |    | 30.64 | 80.4       | 1.99                         |
| acrA-05        | 52B    |    | 31.39 | 86.49      | 1.96                         |
| acrB-01        | 52B    |    |       |            | CurveFitFailed               |
| acrF           | 52B    |    | 32.01 | 82.33      | 1.93                         |
| acrR-01        | 52B    |    |       |            | CurveFitFailed               |
| acrR-02        | 52B    |    |       |            | CurveFitFailed               |
| Actin          | 52B    |    | 21.91 | 87.11      | 1.93                         |
| adeA           | 52B    |    |       |            | LowEfficiency, CtIsSmall, S: |
| ampC-01        | 52B    |    | 32.98 | 80.26      | 1.96                         |
| ampC-02        | 52B    |    |       |            | CurveFitFailed               |
| ampC-04        | 52B    |    | 32.23 | 83.67      | 1.77 MultipleMeltPeaks       |
| ampC-05        | 52B    |    |       |            | CurveFitFailed               |
| ampC-06        | 52B    |    |       |            | CurveFitFailed               |
| ampC-07        | 52B    |    | 31.66 | 88.74      | 1.84                         |
| ampC-09        | 52B    |    |       |            | CurveFitFailed               |
| ampC/blaDH     | 52B    |    | 29.56 | 76.95      | 2 MultipleMeltPeaks          |

|               |     |       |       |      |                              |
|---------------|-----|-------|-------|------|------------------------------|
| aph           | 52B |       |       |      | LowEfficiency, CtIsSmall, S: |
| aph(2')-Id-01 | 52B |       |       |      | CurveFitFailed               |
| aph(2')-Id-02 | 52B |       |       |      | LowEfficiency, CtIsSmall, S: |
| aph6ia        | 52B | 25.44 | 78.61 | 1.97 |                              |
| aphA1(aka ka  | 52B | 25.62 | 76.55 | 2.08 |                              |
| bacA-01       | 52B | 39.37 | 76.67 | 1.78 | MultipleMeltPeaks            |
| bacA-02       | 52B | 34.84 | 86.39 | 1.74 |                              |
| BETA-globin   | 52B | 22.87 | 83.99 | 1.99 | MultipleMeltPeaks            |
| bla-ACC-1     | 52B |       |       |      | CurveFitFailed               |
| bla-L1        | 52B | 30    | 84.9  | 1.99 |                              |
| bla1          | 52B |       |       |      | LowEfficiency, CtIsSmall, C: |
| blaCMY        | 52B | 35.34 | 79.95 | 1.89 |                              |
| blaCMY2-01    | 52B | 34.75 | 79.69 | 1.95 |                              |
| blaCMY2-02    | 52B | 29.26 | 83.45 | 2    |                              |
| blaCTX-M-01   | 52B | 38.4  | 86.44 | 1.78 |                              |
| blaCTX-M-02   | 52B | 33.51 | 84.52 | 1.83 | MultipleMeltPeaks            |
| blaCTX-M-03   | 52B |       |       |      | LowEfficiency, CtIsSmall, C: |
| blaCTX-M-04   | 52B | 35.25 | 80.41 | 1.8  | MultipleMeltPeaks            |
| blaCTX-M-05   | 52B | 32.69 | 76.38 | 1.77 |                              |
| blaCTX-M-06   | 52B |       |       |      | CurveFitFailed               |
| blaGES        | 52B |       |       |      | NoAmplification              |
| blaIMP-01     | 52B |       |       |      | LowEfficiency, CtIsSmall, S: |
| blaIMP-02     | 52B |       |       |      | CurveFitFailed               |
| blaMOX/blaC   | 52B |       |       |      | NoAmplification              |
| blaOCH        | 52B | 30.08 | 85.28 | 1.94 | MultipleMeltPeaks            |
| blaOKP        | 52B |       |       |      | NoAmplification              |
| blaOXA1/blaC  | 52B |       |       |      | LowEfficiency, CtIsSmall, S: |
| blaOXA10-01   | 52B |       |       |      | CurveFitFailed               |
| blaOXA10-02   | 52B |       |       |      | CurveFitFailed               |
| blaOXY        | 52B | 35.37 | 89.83 | 1.73 |                              |
| blaPAO        | 52B |       |       |      | NoAmplification              |
| blaPER        | 52B | 34.06 | 70.27 | 1.65 |                              |
| blaPSE        | 52B |       |       |      | LowEfficiency, CtIsSmall, C: |
| blaROB        | 52B | 37.63 | 82.24 | 1.76 |                              |
| blaSFO        | 52B | 30.4  | 87.26 | 1.93 |                              |
| blaSHV-01     | 52B | 34.02 | 87.94 | 2.02 | MultipleMeltPeaks            |
| blaSHV-02     | 52B |       |       |      | BadR2, LowEfficiency, CtIsS  |
| blaTEM        | 52B | 38.68 | 62.59 | 1.87 | MultipleMeltPeaks            |
| blaTLA        | 52B |       |       |      | CurveFitFailed               |
| blaVEB        | 52B |       |       |      | CurveFitFailed               |
| blaVIM        | 52B |       |       |      | CurveFitFailed               |
| blaZ          | 52B |       |       |      | LowEfficiency, CtIsSmall, S: |
| carB          | 52B | 31.77 | 82.23 | 1.93 |                              |
| catA1         | 52B |       |       |      | NoAmplification              |
| catB3         | 52B |       |       |      | CurveFitFailed               |
| catB8         | 52B | 29.04 | 82.92 | 1.96 |                              |

|            |     |       |       |      |                              |
|------------|-----|-------|-------|------|------------------------------|
| ceoA       | 52B | 28.56 | 86.55 | 1.98 |                              |
| cepA       | 52B |       |       |      | LowEfficiency, CtIsSmall, S: |
| cfiA       | 52B | 34.08 | 84.8  | 1.85 |                              |
| cfr        | 52B |       |       |      | LowEfficiency, CtIsSmall, S: |
| cfxA       | 52B | 22.12 | 77.75 | 2.07 |                              |
| cmeA       | 52B |       |       |      | LowEfficiency, CtIsSmall, S: |
| cmlA1-01   | 52B | 32.59 | 89.72 | 1.91 |                              |
| cmlA1-02   | 52B |       |       |      | LowEfficiency, CtIsSmall, S: |
| cmr        | 52B |       |       |      | LowEfficiency, CtIsSmall, S: |
| cmx(A)     | 52B | 27.27 | 84.83 | 2.05 | MultipleMeltPeaks            |
| cphA-01    | 52B | 30.37 | 86.84 | 1.92 |                              |
| cphA-02    | 52B | 39.15 | 78.14 | 1.81 | MultipleMeltPeaks            |
| dfrA1      | 52B |       |       |      | CurveFitFailed               |
| dfrA12     | 52B | 34.52 | 85.95 | 1.67 |                              |
| emrD       | 52B | 34.65 | 90.83 | 1.79 |                              |
| ereA       | 52B | 38.2  | 82.64 | 1.82 |                              |
| ereB       | 52B |       |       |      | CurveFitFailed               |
| erm(34)    | 52B | 39.01 | 63.29 | 1.8  | MultipleMeltPeaks            |
| erm(35)    | 52B |       |       |      | LowEfficiency, CtIsSmall, C: |
| erm(36)    | 52B | 33.17 | 86.32 | 2.13 |                              |
| ermA       | 52B |       |       |      | CurveFitFailed               |
| ermA/ermTR | 52B |       |       |      | NoAmplification              |
| ermB       | 52B | 24.38 | 74.91 | 2.12 |                              |
| ermC       | 52B |       |       |      | BadR2, LowEfficiency, CtIsS: |
| ermF       | 52B |       |       |      | LowEfficiency, CtIsSmall, S: |
| ermJ/ermD  | 52B |       |       |      | CurveFitFailed               |
| ermK-01    | 52B |       |       |      | CurveFitFailed               |
| ermK-02    | 52B |       |       |      | CurveFitFailed               |
| ermT-01    | 52B |       |       |      | CurveFitFailed               |
| ermT-02    | 52B |       |       |      | CurveFitFailed               |
| ermX       | 52B |       |       |      | CurveFitFailed               |
| ermY       | 52B |       |       |      | LowEfficiency, CtIsSmall, C: |
| fabK       | 52B | 22.33 | 78.78 | 2.08 |                              |
| floR       | 52B | 32.06 | 89.02 | 1.81 |                              |
| folA       | 52B |       |       |      | NoAmplification              |
| fosB       | 52B |       |       |      | LowEfficiency, CtIsSmall, S: |
| fosX       | 52B |       |       |      | CurveFitFailed               |
| fox5       | 52B | 26.04 | 86.35 | 1.94 |                              |
| imiR       | 52B |       |       |      | LowEfficiency, CtIsSmall, S: |
| ImrA-01    | 52B |       |       |      | LowEfficiency, CtIsSmall, S: |
| intl       | 52B | 29.98 | 87.27 | 1.97 |                              |
| intl1      | 52B | 20.72 | 87.49 | 2.03 |                              |
| IS613      | 52B |       |       |      | CurveFitFailed               |
| lnuA-01    | 52B |       |       |      | LowEfficiency, CtIsSmall, S: |
| lnuB-01    | 52B |       |       |      | CurveFitFailed               |
| lnuB-02    | 52B |       |       |      | LowEfficiency, CtIsSmall, S: |

|               |     |       |       |      |                              |
|---------------|-----|-------|-------|------|------------------------------|
| lnuC          | 52B | 34.88 | 86.47 | 1.75 |                              |
| marR-01       | 52B | 34.55 | 85.75 | 1.86 |                              |
| matA/mel      | 52B | 18.06 | 77.81 | 2.1  |                              |
| mdet1         | 52B |       |       |      | CurveFitFailed               |
| mdtA          | 52B | 35.37 | 85.07 | 1.68 |                              |
| mdtE/yhiU     | 52B |       |       |      | LowEfficiency, CtIsSmall, S: |
| mecA          | 52B |       |       |      | LowEfficiency, CtIsSmall, C: |
| mefA          | 52B | 17.2  | 80.62 | 2.05 | MultipleMeltPeaks            |
| mepA          | 52B | 32.84 | 77.35 | 1.96 | MultipleMeltPeaks            |
| mexA          | 52B |       |       |      | CurveFitFailed               |
| mexD          | 52B | 32.92 | 80.08 | 2    |                              |
| mexE          | 52B | 28.22 | 82.27 | 1.99 |                              |
| mexF          | 52B | 28.53 | 87.57 | 2.05 |                              |
| mphA-01       | 52B | 30.55 | 89.28 | 1.96 |                              |
| mphA-02       | 52B | 32.25 | 82.51 | 1.93 | MultipleMeltPeaks            |
| mphB          | 52B |       |       |      | LowEfficiency, CtIsSmall, C: |
| mphC          | 52B |       |       |      | CurveFitFailed               |
| msrA-01       | 52B |       |       |      | LowEfficiency, CtIsSmall, S: |
| msrC-01       | 52B |       |       |      | NoAmplification              |
| mtrC-01       | 52B |       |       |      | LowEfficiency, CtIsSmall, S: |
| mtrC-02       | 52B |       |       |      | CurveFitFailed               |
| mtrD-02       | 52B | 26.83 | 81.35 | 1.98 |                              |
| mtrD-03       | 52B | 28.98 | 82.27 | 1.95 |                              |
| NDM1          | 52B |       |       |      | CurveFitFailed               |
| nimE          | 52B |       |       |      | LowEfficiency, CtIsSmall, S: |
| nisB          | 52B |       |       |      | LowEfficiency, CtIsSmall, C: |
| oleC          | 52B | 34.84 | 86.98 | 1.86 |                              |
| oprD          | 52B | 28.9  | 86.78 | 2.01 |                              |
| oprJ          | 52B | 29.35 | 88.08 | 1.97 |                              |
| pbp           | 52B |       |       |      | CurveFitFailed               |
| pbp2x         | 52B | 22.47 | 76.07 | 2.06 |                              |
| Pbp5          | 52B |       |       |      | CurveFitFailed               |
| penA          | 52B | 37.76 | 80.06 | 1.66 | MultipleMeltPeaks            |
| pikR1         | 52B | 34.43 | 89.14 | 1.86 |                              |
| pikR2         | 52B | 31.5  | 86.39 | 1.81 | MultipleMeltPeaks            |
| pmrA          | 52B | 21.95 | 79.34 | 2.12 |                              |
| pncA          | 52B | 36.18 | 81.16 | 1.43 | MultipleMeltPeaks            |
| putative mult | 52B |       |       |      | CurveFitFailed               |
| qac           | 52B | 31.88 | 84.09 | 1.93 |                              |
| qacA          | 52B |       |       |      | LowEfficiency, CtIsSmall, C: |
| qacA/qacB     | 52B |       |       |      | CurveFitFailed               |
| qacEdelta1-0  | 52B | 27.52 | 79.24 | 2.02 |                              |
| qacEdelta1-0  | 52B | 32.08 | 76.56 | 1.98 | MultipleMeltPeaks            |
| qacH-01       | 52B | 28.24 | 88.66 | 1.91 | MultipleMeltPeaks            |
| qacH-02       | 52B | 36.41 | 83.67 | 1.59 |                              |
| qnrA          | 52B |       |       |      | CtIsLarge, CurveFitFailed    |

|              |     |       |       |      |                              |
|--------------|-----|-------|-------|------|------------------------------|
| rarD-02      | 52B |       |       |      | NoAmplification              |
| sat4         | 52B | 37.59 | 80.15 | 1.5  |                              |
| sdeB         | 52B |       |       |      | LowEfficiency, CtIsSmall, S: |
| spcN-01      | 52B |       |       |      | LowEfficiency, CtIsSmall, S: |
| speA         | 52B |       |       |      | LowEfficiency, CtIsSmall, C: |
| str          | 52B | 27.9  | 72.79 | 2.01 |                              |
| strA         | 52B |       |       |      | LowEfficiency, CtIsSmall, S: |
| strB         | 52B |       |       |      | BadR2, LowEfficiency, CtIsS  |
| sul1         | 52B | 34.19 | 87.32 | 1.74 | MultipleMeltPeaks            |
| sul2         | 52B | 28.21 | 85.7  | 1.93 |                              |
| sulA/foIP-01 | 52B | 19.81 | 81.55 | 1.98 |                              |
| sulA/foIP-03 | 52B | 17.9  | 83    | 2.07 |                              |
| tet(32)      | 52B | 28.81 | 81.22 | 1.97 |                              |
| tet(34)      | 52B |       |       |      | LowEfficiency, CtIsSmall, S: |
| tet(35)      | 52B |       |       |      | NoAmplification              |
| tet(36)-A    | 52B | 35.23 | 81.97 | 1.89 |                              |
| tet(36)-B    | 52B |       |       |      | LowEfficiency, CtIsSmall, S: |
| tet(37)      | 52B | 21.23 | 76.54 | 2.04 |                              |
| tetA-01      | 52B | 28.91 | 85.24 | 1.89 |                              |
| tetA-02      | 52B | 27.32 | 82.41 | 1.98 |                              |
| tetB-01      | 52B | 36.33 | 86.32 | 1.83 |                              |
| tetB-02      | 52B |       |       |      | CurveFitFailed               |
| tetC-01      | 52B |       |       |      | NoAmplification              |
| tetC-02      | 52B |       |       |      | LowEfficiency, CtIsSmall, S: |
| tetD-01      | 52B |       |       |      | CurveFitFailed               |
| tetD-02      | 52B | 36.41 | 82.04 | 1.86 |                              |
| tetE         | 52B |       |       |      | NoAmplification              |
| tetG-01      | 52B | 30.67 | 89.94 | 1.91 |                              |
| tetG-02      | 52B | 37.07 | 76.97 | 1.82 | MultipleMeltPeaks            |
| tetH         | 52B |       |       |      | CurveFitFailed               |
| tetJ         | 52B | 38.62 | 80.63 | 1.79 |                              |
| tetK         | 52B | 28.55 | 72.38 | 2.05 |                              |
| tetL-01      | 52B |       |       |      | LowEfficiency, CtIsSmall, C: |
| tetL-02      | 52B | 35.01 | 85.42 | 1.72 |                              |
| tetM-01      | 52B | 19.81 | 75.9  | 2.01 |                              |
| tetM-02      | 52B | 20.86 | 77.57 | 2.02 |                              |
| tetO-01      | 52B | 20.61 | 77.13 | 2.05 |                              |
| tetPA        | 52B |       |       |      | NoAmplification              |
| tetPB-01     | 52B | 39.28 | 63.72 | 1.67 | MultipleMeltPeaks            |
| tetPB-02     | 52B | 30.49 | 85.15 | 2    |                              |
| tetPB-03     | 52B |       |       |      | CurveFitFailed               |
| tetPB-05     | 52B |       |       |      | LowEfficiency, CtIsSmall, S: |
| tetQ         | 52B | 23.4  | 76.08 | 2    |                              |
| tetR-02      | 52B | 27.98 | 85.14 | 1.96 | MultipleMeltPeaks            |
| tetR-03      | 52B |       |       |      | CurveFitFailed               |
| tetS         | 52B |       |       |      | LowEfficiency, CtIsSmall, S: |

|             |     |       |       |      |                                          |
|-------------|-----|-------|-------|------|------------------------------------------|
| tetT        | 52B | 34.54 | 83.51 | 1.81 |                                          |
| tetU-01     | 52B |       |       |      | LowEfficiency, CtIsSmall, S <sub>c</sub> |
| tetV        | 52B |       |       |      | LowEfficiency, CtIsSmall, S <sub>c</sub> |
| tetW-01     | 52B | 20.75 | 82.22 | 1.99 |                                          |
| tetX        | 52B |       |       |      | CurveFitFailed                           |
| tnpA-01     | 52B |       |       |      | LowEfficiency, CtIsSmall, S <sub>c</sub> |
| tnpA-02     | 52B | 27.99 | 84.89 | 1.78 |                                          |
| tnpA-03     | 52B | 20    | 77.69 | 2.08 |                                          |
| tnpA-04     | 52B | 27.93 | 82.42 | 1.93 |                                          |
| tnpA-05     | 52B | 25.83 | 80.86 | 1.94 |                                          |
| tnpA-07     | 52B |       |       |      | LowEfficiency, CtIsSmall, S <sub>c</sub> |
| tolC-01     | 52B | 30.74 | 84.03 | 1.9  |                                          |
| tolC-02     | 52B | 33.4  | 85.3  | 1.96 | MultipleMeltPeaks                        |
| tolC-03     | 52B | 33.61 | 85.61 | 1.95 | MultipleMeltPeaks                        |
| Tp614       | 52B | 39.22 | 78.55 | 1.77 | MultipleMeltPeaks                        |
| ttgA        | 52B | 36.69 | 81.87 | 1.9  | MultipleMeltPeaks                        |
| ttgB        | 52B |       |       |      | LowEfficiency, CtIsSmall, S <sub>c</sub> |
| vanA        | 52B |       |       |      | NoAmplification                          |
| vanB-01     | 52B | 33.03 | 85.11 | 1.98 |                                          |
| vanC-01     | 52B |       |       |      | LowEfficiency, CtIsSmall, S <sub>c</sub> |
| vanC-02     | 52B |       |       |      | CurveFitFailed                           |
| vanC-03     | 52B | 27.2  | 84.58 | 1.94 |                                          |
| vanC1       | 52B | 37.35 | 73.38 | 2.04 |                                          |
| vanC2/vanC3 | 52B | 33.91 | 84.7  | 1.98 |                                          |
| vanG        | 52B |       |       |      | NoAmplification                          |
| vanHB       | 52B | 35.7  | 82.92 | 1.81 |                                          |
| vanHD       | 52B | 39.25 | 74.45 | 1.81 |                                          |
| vanRA-01    | 52B |       |       |      | LowEfficiency, CtIsSmall, C <sub>i</sub> |
| vanRA-02    | 52B |       |       |      | CurveFitFailed                           |
| vanRB       | 52B | 34.03 | 87.32 | 1.85 | MultipleMeltPeaks                        |
| vanRC       | 52B |       |       |      | CurveFitFailed                           |
| vanRC4      | 52B |       |       |      | LowEfficiency, CtIsSmall, C <sub>i</sub> |
| vanRD       | 52B |       |       |      | LowEfficiency, CtIsSmall, C <sub>i</sub> |
| vanSA       | 52B |       |       |      | LowEfficiency, CtIsSmall, S <sub>c</sub> |
| vanSB       | 52B | 29.56 | 74.89 | 2.06 |                                          |
| vanSC-01    | 52B | 30.61 | 84.06 | 2.08 |                                          |
| vanSC-02    | 52B |       |       |      | NoAmplification                          |
| vanTC-01    | 52B |       |       |      | LowEfficiency, CtIsSmall, S <sub>c</sub> |
| vanTC-02    | 52B | 35.08 | 83.24 | 1.84 |                                          |
| vanTE       | 52B |       |       |      | CurveFitFailed                           |
| vanTG       | 52B |       |       |      | NoAmplification                          |
| vanWB       | 52B |       |       |      | CurveFitFailed                           |
| vanWG       | 52B |       |       |      | CurveFitFailed                           |
| vanXA       | 52B |       |       |      | CurveFitFailed                           |
| vanXB       | 52B |       |       |      | NoAmplification                          |
| vanXD       | 52B | 30.54 | 75.62 | 2.01 |                                          |

|              |     |       |       |      |                              |
|--------------|-----|-------|-------|------|------------------------------|
| vanYB        | 52B |       |       |      | LowEfficiency, CtIsSmall, S: |
| vanYD-01     | 52B | 32.27 | 82.71 | 1.85 | MultipleMeltPeaks            |
| vanYD-02     | 52B |       |       |      | LowEfficiency, CtIsSmall, S: |
| vatB-01      | 52B | 37.86 | 74.91 | 1.88 |                              |
| vatB-02      | 52B |       |       |      | CurveFitFailed               |
| vatC-01      | 52B | 39.06 | 81.29 | 1.74 |                              |
| vatC-02      | 52B | 33.15 | 86.33 | 1.87 |                              |
| vatE-01      | 52B | 31.04 | 76.98 | 2.1  |                              |
| vatE-02      | 52B |       |       |      | NoAmplification              |
| vgaA-01      | 52B |       |       |      | LowEfficiency, CtIsSmall, S: |
| vgaA-02      | 52B |       |       |      | CurveFitFailed               |
| vgb-01       | 52B | 32.37 | 87.38 | 1.93 |                              |
| vgbB-01      | 52B |       |       |      | CurveFitFailed               |
| vgbB-02      | 52B |       |       |      | CurveFitFailed               |
| yceE/mdtG-0  | 52B |       |       |      | LowEfficiency, CtIsSmall, S: |
| yceE/mdtG-0  | 52B |       |       |      | NoAmplification              |
| yceL/mdtH-0  | 52B | 25.22 | 76.85 | 1.95 |                              |
| yceL/mdtH-0  | 52B |       |       |      | LowEfficiency, CtIsSmall, S: |
| yceL/mdtH-0  | 52B | 36.66 | 86.62 | 1.73 |                              |
| yidY/mdtL-01 | 52B | 32.95 | 84.63 | 1.91 |                              |
| yidY/mdtL-02 | 52B | 36.23 | 92.01 | 1.8  | MultipleMeltPeaks            |































| Assay          | Sample | Ct | Tm    | Efficiency | flag                   |
|----------------|--------|----|-------|------------|------------------------|
| 16S rRNA       | 52C    |    | 16.65 | 82.31      | 2.05                   |
| aac            | 52C    |    | 30.52 | 81.34      | 1.85 MultipleMeltPeaks |
| aac(6')-Ib(akz | 52C    |    | 40.04 | 64.09      | 1.89 MultipleMeltPeaks |
| aac(6')-Ib(akz | 52C    |    | 30.79 | 82.78      | 1.93                   |
| aac(6')-Ib(akz | 52C    |    | 32.29 | 78.45      | 1.94 MultipleMeltPeaks |
| aac(6')-II     | 52C    |    | 34.22 | 81.33      | 1.7 MultipleMeltPeaks  |
| aac(6')I1      | 52C    |    | 33.19 | 90.31      | 1.83                   |
| aacA/aphD      | 52C    |    |       |            | NoAmplification        |
| aacC           | 52C    |    | 30.76 | 91.88      | 1.88                   |
| aacC1          | 52C    |    |       |            | NoAmplification        |
| aacC2          | 52C    |    |       |            | NoAmplification        |
| aacC4          | 52C    |    | 30.91 | 87.18      | 1.86 MultipleMeltPeaks |
| aadA-01        | 52C    |    |       |            | NoAmplification        |
| aadA-02        | 52C    |    | 30.15 | 80.44      | 1.94                   |
| aadA-1-01      | 52C    |    | 36.42 | 85.52      | 1.82                   |
| aadA-1-02      | 52C    |    |       |            | NoAmplification        |
| aadA1          | 52C    |    | 32.49 | 81.77      | 2.01                   |
| aadA2-01       | 52C    |    | 41.62 | 84.92      | 1.59 MultipleMeltPeaks |
| aadA2-02       | 52C    |    | 32.27 | 75.34      | 1.93                   |
| aadA2-03       | 52C    |    |       |            | NoAmplification        |
| aadA5-01       | 52C    |    | 37.67 | 78.83      | 1.8                    |
| aadA5-02       | 52C    |    | 32.16 | 83.56      | 1.95                   |
| aadA9-01       | 52C    |    | 35.24 | 89         | 1.82                   |
| aadA9-02       | 52C    |    | 37.94 | 78.79      | 2.08 MultipleMeltPeaks |
| aadD           | 52C    |    |       |            | NoAmplification        |
| aadE           | 52C    |    |       |            | NoAmplification        |
| acrA-01        | 52C    |    | 35.4  | 81.18      | 1.79 MultipleMeltPeaks |
| acrA-02        | 52C    |    | 37.54 | 85.42      | 1.78                   |
| acrA-03        | 52C    |    | 42.03 | 86.33      | 1.62 MultipleMeltPeaks |
| acrA-04        | 52C    |    | 29.92 | 81.65      | 1.96 MultipleMeltPeaks |
| acrA-05        | 52C    |    | 29.99 | 87.96      | 1.93                   |
| acrB-01        | 52C    |    |       |            | NoAmplification        |
| acrF           | 52C    |    | 29.98 | 84.66      | 2.04                   |
| acrR-01        | 52C    |    | 33.88 | 81.19      | 1.9                    |
| acrR-02        | 52C    |    | 36.07 | 85.97      | 1.77                   |
| Actin          | 52C    |    | 22.81 | 86.71      | 1.96                   |
| adeA           | 52C    |    | 34.34 | 76.84      | 1.9 MultipleMeltPeaks  |
| ampC-01        | 52C    |    | 31.7  | 79.09      | 1.98                   |
| ampC-02        | 52C    |    |       |            | NoAmplification        |
| ampC-04        | 52C    |    | 30.52 | 78.67      | 1.94 MultipleMeltPeaks |
| ampC-05        | 52C    |    |       |            | NoAmplification        |
| ampC-06        | 52C    |    | 34.04 | 84.06      | 1.91                   |
| ampC-07        | 52C    |    | 33.48 | 88.61      | 1.86                   |
| ampC-09        | 52C    |    | 34.15 | 76.43      | 1.96                   |
| ampC/blaDH     | 52C    |    | 29.79 | 84.3       | 1.93                   |

|               |     |       |       |      |                   |
|---------------|-----|-------|-------|------|-------------------|
| aph           | 52C |       |       |      | NoAmplification   |
| aph(2')-Id-01 | 52C |       |       |      | NoAmplification   |
| aph(2')-Id-02 | 52C |       |       |      | NoAmplification   |
| aph6ia        | 52C | 31.39 | 80.71 | 1.9  |                   |
| aphA1(aka ka  | 52C |       |       |      | NoAmplification   |
| bacA-01       | 52C | 40.5  | 77.81 | 1.74 | MultipleMeltPeaks |
| bacA-02       | 52C | 31.04 | 88.05 | 1.86 |                   |
| BETA-globin   | 52C | 24.1  | 83.71 | 1.95 | MultipleMeltPeaks |
| bla-ACC-1     | 52C | 32.14 | 86.78 | 1.94 | MultipleMeltPeaks |
| bla-L1        | 52C | 28.82 | 85.68 | 1.93 |                   |
| bla1          | 52C |       |       |      | NoAmplification   |
| blaCMY        | 52C |       |       |      | CurveFitFailed    |
| blaCMY2-01    | 52C | 35.68 | 81.4  | 1.91 | MultipleMeltPeaks |
| blaCMY2-02    | 52C | 29.79 | 84.42 | 1.94 | MultipleMeltPeaks |
| blaCTX-M-01   | 52C |       |       |      | NoAmplification   |
| blaCTX-M-02   | 52C | 29.03 | 84.89 | 1.87 | MultipleMeltPeaks |
| blaCTX-M-03   | 52C |       |       |      | NoAmplification   |
| blaCTX-M-04   | 52C | 31.21 | 85.2  | 1.98 |                   |
| blaCTX-M-05   | 52C | 31.9  | 76.27 | 1.81 |                   |
| blaCTX-M-06   | 52C | 32.02 | 80.04 | 1.91 |                   |
| blaGES        | 52C |       |       |      | NoAmplification   |
| blaIMP-01     | 52C |       |       |      | NoAmplification   |
| blaIMP-02     | 52C | 37.78 | 78.39 | 1.86 |                   |
| blaMOX/blaC   | 52C | 39.37 | 88.2  | 1.79 | MultipleMeltPeaks |
| blaOCH        | 52C | 32.47 | 82.87 | 1.92 | MultipleMeltPeaks |
| blaOKP        | 52C |       |       |      | NoAmplification   |
| blaOXA1/blaC  | 52C |       |       |      | NoAmplification   |
| blaOXA10-01   | 52C |       |       |      | NoAmplification   |
| blaOXA10-02   | 52C |       |       |      | NoAmplification   |
| blaOXY        | 52C | 33.55 | 88.2  | 1.75 | MultipleMeltPeaks |
| blaPAO        | 52C |       |       |      | NoAmplification   |
| blaPER        | 52C | 38.75 | 78.58 | 1.76 | MultipleMeltPeaks |
| blaPSE        | 52C |       |       |      | NoAmplification   |
| blaROB        | 52C | 38.79 | 87.54 | 1.74 |                   |
| blaSFO        | 52C | 31.09 | 83.86 | 1.91 | MultipleMeltPeaks |
| blaSHV-01     | 52C | 32.86 | 87.66 | 1.81 |                   |
| blaSHV-02     | 52C |       |       |      | NoAmplification   |
| blaTEM        | 52C | 34.2  | 82.99 | 1.99 | MultipleMeltPeaks |
| blaTLA        | 52C |       |       |      | NoAmplification   |
| blaVEB        | 52C |       |       |      | NoAmplification   |
| blaVIM        | 52C |       |       |      | NoAmplification   |
| blaZ          | 52C | 28.14 | 75.21 | 2.05 |                   |
| carB          | 52C | 35.37 | 87.16 | 1.81 |                   |
| catA1         | 52C |       |       |      | NoAmplification   |
| catB3         | 52C |       |       |      | CurveFitFailed    |
| catB8         | 52C | 27.27 | 84.43 | 1.97 | MultipleMeltPeaks |

|            |     |       |       |      |                              |
|------------|-----|-------|-------|------|------------------------------|
| ceoA       | 52C | 26.66 | 82.05 | 1.94 | MultipleMeltPeaks            |
| cepA       | 52C |       |       |      | NoAmplification              |
| cfiA       | 52C | 30.52 | 86.77 | 1.91 |                              |
| cfr        | 52C |       |       |      | LowEfficiency, CtIsSmall, C  |
| cfxA       | 52C |       |       |      | NoAmplification              |
| cmeA       | 52C | 33.56 | 81.52 | 1.84 |                              |
| cmlA1-01   | 52C | 31.98 | 87.97 | 1.93 |                              |
| cmlA1-02   | 52C |       |       |      | NoAmplification              |
| cmr        | 52C |       |       |      | CurveFitFailed               |
| cmx(A)     | 52C | 26.15 | 84.47 | 1.93 | MultipleMeltPeaks            |
| cphA-01    | 52C | 29.69 | 88.39 | 1.94 | MultipleMeltPeaks            |
| cphA-02    | 52C |       |       |      | CurveFitFailed               |
| dfrA1      | 52C | 37.5  | 76.07 | 2.17 | MultipleMeltPeaks            |
| dfrA12     | 52C | 31.7  | 85.91 | 1.74 |                              |
| emrD       | 52C | 37.1  | 76.5  | 1.78 | MultipleMeltPeaks            |
| ereA       | 52C | 36.55 | 82.46 | 1.83 |                              |
| ereB       | 52C |       |       |      | CurveFitFailed               |
| erm(34)    | 52C |       |       |      | NoAmplification              |
| erm(35)    | 52C |       |       |      | NoAmplification              |
| erm(36)    | 52C | 32.34 | 87.66 | 1.9  |                              |
| ermA       | 52C |       |       |      | NoAmplification              |
| ermA/ermTR | 52C |       |       |      | NoAmplification              |
| ermB       | 52C |       |       |      | NoAmplification              |
| ermC       | 52C | 35.46 | 88.61 | 1.85 |                              |
| ermF       | 52C |       |       |      | NoAmplification              |
| ermJ/ermD  | 52C |       |       |      | NoAmplification              |
| ermK-01    | 52C |       |       |      | NoAmplification              |
| ermK-02    | 52C | 35.62 | 79.71 | 1.7  | MultipleMeltPeaks            |
| ermT-01    | 52C |       |       |      | NoAmplification              |
| ermT-02    | 52C | 35.74 | 79.58 | 1.86 |                              |
| ermX       | 52C | 35.63 | 85.83 | 1.72 |                              |
| ermY       | 52C |       |       |      | NoAmplification              |
| fabK       | 52C | 25.4  | 78.74 | 2.09 |                              |
| floR       | 52C |       |       |      | NoAmplification              |
| folA       | 52C |       |       |      | NoAmplification              |
| fosB       | 52C |       |       |      | LowEfficiency, CtIsSmall, S  |
| fosX       | 52C |       |       |      | NoAmplification              |
| fox5       | 52C | 26.19 | 87.44 | 1.94 |                              |
| imiR       | 52C |       |       |      | CurveFitFailed               |
| ImrA-01    | 52C |       |       |      | CurveFitFailed               |
| intl       | 52C | 27.97 | 87.01 | 1.98 | MultipleMeltPeaks            |
| intl1      | 52C | 19.13 | 87.43 | 2.02 |                              |
| IS613      | 52C |       |       |      | NoAmplification              |
| lnuA-01    | 52C |       |       |      | LowEfficiency, CtIsSmall, S  |
| lnuB-01    | 52C |       |       |      | NoAmplification              |
| lnuB-02    | 52C |       |       |      | CtIsSmall, CurveFitFailed, F |

|               |     |       |       |      |                   |
|---------------|-----|-------|-------|------|-------------------|
| lnuC          | 52C | 34.21 | 84.26 | 1.73 |                   |
| marR-01       | 52C | 34.77 | 85.04 | 1.83 |                   |
| matA/mel      | 52C | 18.85 | 77.65 | 2.09 |                   |
| mdetI1        | 52C |       |       |      | NoAmplification   |
| mdtA          | 52C | 38.24 | 81.83 | 1.73 | MultipleMeltPeaks |
| mdtE/yhiU     | 52C |       |       |      | NoAmplification   |
| mecA          | 52C |       |       |      | NoAmplification   |
| mefA          | 52C | 18.74 | 80.52 | 2    |                   |
| mepA          | 52C | 37    | 84.66 | 1.77 | MultipleMeltPeaks |
| mexA          | 52C | 38.96 | 76.82 | 1.84 |                   |
| mexD          | 52C | 33.4  | 80.02 | 2.01 |                   |
| mexE          | 52C | 33.84 | 81.96 | 1.88 |                   |
| mexF          | 52C | 28.33 | 87.6  | 2.11 |                   |
| mphA-01       | 52C | 30.55 | 86.76 | 2    |                   |
| mphA-02       | 52C | 29.46 | 86.8  | 2.29 | MultipleMeltPeaks |
| mphB          | 52C | 41.51 | 72.23 | 1.57 |                   |
| mphC          | 52C | 37.86 | 77.64 | 1.79 | MultipleMeltPeaks |
| msrA-01       | 52C |       |       |      | NoAmplification   |
| msrC-01       | 52C |       |       |      | NoAmplification   |
| mtrC-01       | 52C |       |       |      | NoAmplification   |
| mtrC-02       | 52C | 32.57 | 84.22 | 1.99 |                   |
| mtrD-02       | 52C | 27.08 | 84.83 | 2.02 |                   |
| mtrD-03       | 52C | 28.62 | 82.08 | 1.94 |                   |
| NDM1          | 52C |       |       |      | CurveFitFailed    |
| nimE          | 52C | 36.62 | 80.91 | 1.92 |                   |
| nisB          | 52C |       |       |      | NoAmplification   |
| oleC          | 52C |       |       |      | CurveFitFailed    |
| oprD          | 52C | 26.91 | 85.6  | 1.99 |                   |
| oprJ          | 52C | 31.78 | 89.72 | 1.87 | MultipleMeltPeaks |
| pbp           | 52C | 38.37 | 79.9  | 1.73 |                   |
| pbp2x         | 52C |       |       |      | NoAmplification   |
| Pbp5          | 52C |       |       |      | NoAmplification   |
| penA          | 52C | 34.29 | 86.31 | 1.79 | MultipleMeltPeaks |
| pikR1         | 52C | 36.3  | 89.06 | 1.82 |                   |
| pikR2         | 52C | 30.53 | 85.2  | 1.99 |                   |
| pmrA          | 52C | 27.83 | 79.26 | 2.07 |                   |
| pncA          | 52C | 36.23 | 88.28 | 1.65 | MultipleMeltPeaks |
| putative mult | 52C | 31.83 | 84.1  | 1.95 |                   |
| qac           | 52C |       |       |      | CurveFitFailed    |
| qacA          | 52C | 38.07 | 70.45 | 1.76 |                   |
| qacA/qacB     | 52C | 40.16 | 84.59 | 1.43 | MultipleMeltPeaks |
| qacEdelta1-0  | 52C |       |       |      | NoAmplification   |
| qacEdelta1-0  | 52C | 34.69 | 77.93 | 1.97 |                   |
| qacH-01       | 52C | 30.22 | 89.71 | 1.91 | MultipleMeltPeaks |
| qacH-02       | 52C | 32.82 | 83.82 | 1.72 | MultipleMeltPeaks |
| qnrA          | 52C | 37.05 | 78.5  | 1.9  |                   |



|              |     |       |       |      |                              |
|--------------|-----|-------|-------|------|------------------------------|
| rarD-02      | 52C | 35.35 | 85.87 | 1.85 |                              |
| sat4         | 52C |       |       |      | NoAmplification              |
| sdeB         | 52C |       |       |      | NoAmplification              |
| spcN-01      | 52C |       |       |      | NoAmplification              |
| speA         | 52C |       |       |      | NoAmplification              |
| str          | 52C | 28.29 | 72.77 | 2.02 |                              |
| strA         | 52C |       |       |      | NoAmplification              |
| strB         | 52C |       |       |      | CurveFitFailed               |
| sul1         | 52C | 38.15 | 85.55 | 1.68 | MultipleMeltPeaks            |
| sul2         | 52C | 37.95 | 75.19 | 1.57 |                              |
| sulA/foIP-01 | 52C | 24.56 | 81.57 | 1.99 |                              |
| sulA/foIP-03 | 52C | 21.83 | 82.76 | 2.01 |                              |
| tet(32)      | 52C |       |       |      | NoAmplification              |
| tet(34)      | 52C | 31.99 | 75.58 | 2.02 |                              |
| tet(35)      | 52C | 36.47 | 81.65 | 1.85 |                              |
| tet(36)-A    | 52C |       |       |      | LowEfficiency, CtIsSmall, S: |
| tet(36)-B    | 52C |       |       |      | NoAmplification              |
| tet(37)      | 52C | 28.12 | 80.77 | 2    |                              |
| tetA-01      | 52C | 29.14 | 85.16 | 1.91 |                              |
| tetA-02      | 52C |       |       |      | CurveFitFailed               |
| tetB-01      | 52C | 31.16 | 86.46 | 1.94 | MultipleMeltPeaks            |
| tetB-02      | 52C | 39.73 | 74.32 | 1.78 |                              |
| tetC-01      | 52C |       |       |      | NoAmplification              |
| tetC-02      | 52C |       |       |      | NoAmplification              |
| tetD-01      | 52C |       |       |      | NoAmplification              |
| tetD-02      | 52C |       |       |      | NoAmplification              |
| tetE         | 52C |       |       |      | NoAmplification              |
| tetG-01      | 52C | 31.64 | 82.27 | 1.92 |                              |
| tetG-02      | 52C | 39.04 | 79.89 | 1.74 |                              |
| tetH         | 52C |       |       |      | NoAmplification              |
| tetJ         | 52C | 39.73 | 62.12 | 1.84 | MultipleMeltPeaks            |
| tetK         | 52C |       |       |      | NoAmplification              |
| tetL-01      | 52C | 37.69 | 80.82 | 1.72 | MultipleMeltPeaks            |
| tetL-02      | 52C | 30.19 | 85.27 | 1.84 |                              |
| tetM-01      | 52C | 22.34 | 76.26 | 2.02 |                              |
| tetM-02      | 52C | 23.96 | 77.68 | 1.97 |                              |
| tetO-01      | 52C | 24.12 | 77.07 | 2.01 |                              |
| tetPA        | 52C | 34.34 | 72.26 | 1.99 |                              |
| tetPB-01     | 52C |       |       |      | NoAmplification              |
| tetPB-02     | 52C | 29.35 | 84.78 | 1.96 |                              |
| tetPB-03     | 52C |       |       |      | NoAmplification              |
| tetPB-05     | 52C |       |       |      | NoAmplification              |
| tetQ         | 52C | 26.41 | 75.98 | 2    |                              |
| tetR-02      | 52C | 30.93 | 88.89 | 1.89 |                              |
| tetR-03      | 52C |       |       |      | NoAmplification              |
| tetS         | 52C | 43.79 | 74.12 | 1.74 | MultipleMeltPeaks            |

|             |     |       |       |      |                             |
|-------------|-----|-------|-------|------|-----------------------------|
| tetT        | 52C |       |       |      | NoAmplification             |
| tetU-01     | 52C |       |       |      | NoAmplification             |
| tetV        | 52C |       |       |      | NoAmplification             |
| tetW-01     | 52C | 25.81 | 81.8  | 1.96 |                             |
| tetX        | 52C |       |       |      | CurveFitFailed              |
| tnpA-01     | 52C |       |       |      | NoAmplification             |
| tnpA-02     | 52C | 32.72 | 85.26 | 1.81 |                             |
| tnpA-03     | 52C | 21.98 | 77.6  | 2.1  |                             |
| tnpA-04     | 52C |       |       |      | NoAmplification             |
| tnpA-05     | 52C | 39.08 | 76.31 | 1.75 |                             |
| tnpA-07     | 52C |       |       |      | NoAmplification             |
| tolC-01     | 52C | 36.19 | 82.03 | 1.78 | MultipleMeltPeaks           |
| tolC-02     | 52C | 29.37 | 87.54 | 1.92 |                             |
| tolC-03     | 52C | 30.09 | 85.91 | 1.96 |                             |
| Tp614       | 52C | 35.01 | 73.49 | 1.89 |                             |
| ttgA        | 52C | 39.56 | 87.07 | 1.89 | MultipleMeltPeaks           |
| ttgB        | 52C | 33.5  | 77.72 | 1.94 |                             |
| vanA        | 52C |       |       |      | NoAmplification             |
| vanB-01     | 52C | 32.81 | 84.52 | 1.97 |                             |
| vanC-01     | 52C |       |       |      | NoAmplification             |
| vanC-02     | 52C |       |       |      | NoAmplification             |
| vanC-03     | 52C | 26.11 | 85.98 | 1.91 | MultipleMeltPeaks           |
| vanC1       | 52C |       |       |      | NoAmplification             |
| vanC2/vanC3 | 52C | 36.35 | 84.41 | 1.79 | MultipleMeltPeaks           |
| vanG        | 52C |       |       |      | NoAmplification             |
| vanHB       | 52C | 32.55 | 87.5  | 1.88 |                             |
| vanHD       | 52C | 34.42 | 82.71 | 1.89 |                             |
| vanRA-01    | 52C |       |       |      | NoAmplification             |
| vanRA-02    | 52C | 39.65 | 81.25 | 1.82 | MultipleMeltPeaks           |
| vanRB       | 52C | 32.1  | 87.44 | 1.99 |                             |
| vanRC       | 52C |       |       |      | NoAmplification             |
| vanRC4      | 52C |       |       |      | BadR2, LowEfficiency, CtIsS |
| vanRD       | 52C |       |       |      | NoAmplification             |
| vanSA       | 52C |       |       |      | NoAmplification             |
| vanSB       | 52C | 34.24 | 74.19 | 1.96 | MultipleMeltPeaks           |
| vanSC-01    | 52C | 35.64 | 77.77 | 1.8  | MultipleMeltPeaks           |
| vanSC-02    | 52C |       |       |      | NoAmplification             |
| vanTC-01    | 52C |       |       |      | NoAmplification             |
| vanTC-02    | 52C | 38.86 | 86.07 | 1.65 | MultipleMeltPeaks           |
| vanTE       | 52C |       |       |      | CurveFitFailed              |
| vanTG       | 52C | 31.26 | 75.08 | 2.03 |                             |
| vanWB       | 52C |       |       |      | NoAmplification             |
| vanWG       | 52C | 33.35 | 75.91 | 2    |                             |
| vanXA       | 52C |       |       |      | NoAmplification             |
| vanXB       | 52C |       |       |      | NoAmplification             |
| vanXD       | 52C | 31.54 | 75.15 | 2.05 |                             |

|              |     |       |       |      |                              |
|--------------|-----|-------|-------|------|------------------------------|
| vanYB        | 52C | 34.7  | 85.27 | 1.9  |                              |
| vanYD-01     | 52C | 33.82 | 89.56 | 1.73 |                              |
| vanYD-02     | 52C |       |       |      | CurveFitFailed               |
| vatB-01      | 52C |       |       |      | NoAmplification              |
| vatB-02      | 52C | 39.66 | 80.64 | 1.74 | MultipleMeltPeaks            |
| vatC-01      | 52C | 34.9  | 73.44 | 1.96 |                              |
| vatC-02      | 52C | 36.43 | 83.22 | 1.82 | MultipleMeltPeaks            |
| vatE-01      | 52C | 29.05 | 77.32 | 2.16 |                              |
| vatE-02      | 52C | 39.13 | 75.35 | 2.04 |                              |
| vgaA-01      | 52C |       |       |      | NoAmplification              |
| vgaA-02      | 52C | 39.75 | 81.49 | 1.7  | MultipleMeltPeaks            |
| vgb-01       | 52C | 32.29 | 84.02 | 1.93 |                              |
| vgbB-01      | 52C | 35.76 | 86.51 | 1.74 |                              |
| vgbB-02      | 52C | 42.54 | 77.93 | 1.77 | MultipleMeltPeaks            |
| yceE/mdtG-0  | 52C |       |       |      | LowEfficiency, CtIsSmall, Ci |
| yceE/mdtG-0  | 52C |       |       |      | NoAmplification              |
| yceL/mdtH-0  | 52C | 28.85 | 83.54 | 1.98 |                              |
| yceL/mdtH-0  | 52C |       |       |      | NoAmplification              |
| yceL/mdtH-0  | 52C | 37.24 | 63.21 | 2.21 | MultipleMeltPeaks            |
| yidY/mdtL-01 | 52C | 32.8  | 85.24 | 1.96 | MultipleMeltPeaks            |
| yidY/mdtL-02 | 52C |       |       |      | NoAmplification              |































| Assay          | Sample | Ct    | Tm    | Efficiency | flag                   |
|----------------|--------|-------|-------|------------|------------------------|
| 16S rRNA       | 53A    |       | 16.94 | 82.44      | 1.98                   |
| aac            | 53A    | 36.55 |       | 83.12      | 1.62 MultipleMeltPeaks |
| aac(6')-Ib(akz | 53A    |       |       |            | NoAmplification        |
| aac(6')-Ib(akz | 53A    |       |       |            | NoAmplification        |
| aac(6')-Ib(akz | 53A    |       |       |            | CurveFitFailed         |
| aac(6')-II     | 53A    |       |       |            | NoAmplification        |
| aac(6')I1      | 53A    |       |       |            | NoAmplification        |
| aacA/aphD      | 53A    |       |       |            | NoAmplification        |
| aacC           | 53A    | 33.13 | 89.53 | 1.84       |                        |
| aacC1          | 53A    |       |       |            | NoAmplification        |
| aacC2          | 53A    |       |       |            | NoAmplification        |
| aacC4          | 53A    |       |       |            | NoAmplification        |
| aadA-01        | 53A    |       |       |            | NoAmplification        |
| aadA-02        | 53A    |       |       |            | NoAmplification        |
| aadA-1-01      | 53A    |       |       |            | NoAmplification        |
| aadA-1-02      | 53A    |       |       |            | NoAmplification        |
| aadA1          | 53A    |       |       |            | NoAmplification        |
| aadA2-01       | 53A    |       |       |            | NoAmplification        |
| aadA2-02       | 53A    |       |       |            | NoAmplification        |
| aadA2-03       | 53A    |       |       |            | NoAmplification        |
| aadA5-01       | 53A    | 40.85 | 83.94 | 1.65       |                        |
| aadA5-02       | 53A    |       |       |            | NoAmplification        |
| aadA9-01       | 53A    |       |       |            | NoAmplification        |
| aadA9-02       | 53A    |       |       |            | NoAmplification        |
| aadD           | 53A    |       |       |            | NoAmplification        |
| aadE           | 53A    | 32.12 | 71.7  | 2.1        |                        |
| acrA-01        | 53A    | 27.98 | 82.93 | 1.93       |                        |
| acrA-02        | 53A    |       |       |            | NoAmplification        |
| acrA-03        | 53A    |       |       |            | NoAmplification        |
| acrA-04        | 53A    |       |       |            | CurveFitFailed         |
| acrA-05        | 53A    | 34.1  | 83.25 | 1.89       | MultipleMeltPeaks      |
| acrB-01        | 53A    | 37.4  | 75.69 | 1.91       | MultipleMeltPeaks      |
| acrF           | 53A    |       |       |            | NoAmplification        |
| acrR-01        | 53A    |       |       |            | NoAmplification        |
| acrR-02        | 53A    | 38.81 | 87.08 | 1.85       | MultipleMeltPeaks      |
| Actin          | 53A    | 28.32 | 87.14 | 1.9        |                        |
| adeA           | 53A    |       |       |            | CurveFitFailed         |
| ampC-01        | 53A    |       |       |            | CurveFitFailed         |
| ampC-02        | 53A    |       |       |            | NoAmplification        |
| ampC-04        | 53A    |       |       |            | NoAmplification        |
| ampC-05        | 53A    |       |       |            | NoAmplification        |
| ampC-06        | 53A    | 31.52 | 73.23 | 1.9        |                        |
| ampC-07        | 53A    | 35.35 | 83.99 | 1.87       |                        |
| ampC-09        | 53A    |       |       |            | NoAmplification        |
| ampC/blaDH     | 53A    |       |       |            | CurveFitFailed         |

|                          |     |       |       |      |                   |
|--------------------------|-----|-------|-------|------|-------------------|
| aph                      | 53A |       |       |      | NoAmplification   |
| aph(2')-Id-01            | 53A |       |       |      | NoAmplification   |
| aph(2')-Id-02            | 53A |       |       |      | NoAmplification   |
| aph6ia                   | 53A | 32.98 | 78.01 | 1.92 | MultipleMeltPeaks |
| aphA1(aka k <sub>z</sub> | 53A |       |       |      | NoAmplification   |
| bacA-01                  | 53A |       |       |      | NoAmplification   |
| bacA-02                  | 53A |       |       |      | NoAmplification   |
| BETA-globin              | 53A | 27.89 | 84.14 | 1.98 |                   |
| bla-ACC-1                | 53A |       |       |      | NoAmplification   |
| bla-L1                   | 53A | 33.05 | 86.22 | 1.9  |                   |
| bla1                     | 53A |       |       |      | NoAmplification   |
| blaCMY                   | 53A |       |       |      | NoAmplification   |
| blaCMY2-01               | 53A |       |       |      | NoAmplification   |
| blaCMY2-02               | 53A | 36.89 | 88.35 | 1.75 |                   |
| blaCTX-M-01              | 53A |       |       |      | NoAmplification   |
| blaCTX-M-02              | 53A |       |       |      | NoAmplification   |
| blaCTX-M-03              | 53A |       |       |      | NoAmplification   |
| blaCTX-M-04              | 53A |       |       |      | CurveFitFailed    |
| blaCTX-M-05              | 53A | 31    | 76.19 | 1.73 |                   |
| blaCTX-M-06              | 53A |       |       |      | NoAmplification   |
| blaGES                   | 53A |       |       |      | NoAmplification   |
| blaIMP-01                | 53A |       |       |      | NoAmplification   |
| blaIMP-02                | 53A |       |       |      | NoAmplification   |
| blaMOX/blaC              | 53A |       |       |      | NoAmplification   |
| blaOCH                   | 53A |       |       |      | NoAmplification   |
| blaOKP                   | 53A |       |       |      | NoAmplification   |
| blaOXA1/blaC             | 53A |       |       |      | NoAmplification   |
| blaOXA10-01              | 53A |       |       |      | NoAmplification   |
| blaOXA10-02              | 53A |       |       |      | NoAmplification   |
| blaOXY                   | 53A | 34.87 | 88.49 | 1.71 |                   |
| blaPAO                   | 53A |       |       |      | NoAmplification   |
| blaPER                   | 53A |       |       |      | CurveFitFailed    |
| blaPSE                   | 53A |       |       |      | CurveFitFailed    |
| blaROB                   | 53A |       |       |      | NoAmplification   |
| blaSFO                   | 53A | 37.72 | 83.11 | 1.75 |                   |
| blaSHV-01                | 53A |       |       |      | NoAmplification   |
| blaSHV-02                | 53A | 37.86 | 83.97 | 1.81 | MultipleMeltPeaks |
| blaTEM                   | 53A | 24.86 | 79.31 | 2.03 |                   |
| blaTLA                   | 53A |       |       |      | NoAmplification   |
| blaVEB                   | 53A |       |       |      | NoAmplification   |
| blaVIM                   | 53A |       |       |      | NoAmplification   |
| blaZ                     | 53A | 28.78 | 75.15 | 2.03 |                   |
| carB                     | 53A |       |       |      | NoAmplification   |
| catA1                    | 53A |       |       |      | NoAmplification   |
| catB3                    | 53A | 34.58 | 81.51 | 1.89 |                   |
| catB8                    | 53A | 32.5  | 82.05 | 1.9  |                   |

|            |     |       |       |      |                              |
|------------|-----|-------|-------|------|------------------------------|
| ceoA       | 53A | 30.9  | 82.42 | 1.91 |                              |
| cepA       | 53A |       |       |      | NoAmplification              |
| cfiA       | 53A |       |       |      | NoAmplification              |
| cfr        | 53A |       |       |      | NoAmplification              |
| cfxA       | 53A | 25.44 | 77.56 | 2.03 |                              |
| cmeA       | 53A |       |       |      | NoAmplification              |
| cmlA1-01   | 53A |       |       |      | NoAmplification              |
| cmlA1-02   | 53A | 38.05 | 90.7  | 1.82 | MultipleMeltPeaks            |
| cmr        | 53A |       |       |      | NoAmplification              |
| cmx(A)     | 53A | 31.94 | 84.65 | 1.98 |                              |
| cphA-01    | 53A |       |       |      | NoAmplification              |
| cphA-02    | 53A |       |       |      | CurveFitFailed               |
| dfrA1      | 53A |       |       |      | NoAmplification              |
| dfrA12     | 53A |       |       |      | NoAmplification              |
| emrD       | 53A |       |       |      | NoAmplification              |
| ereA       | 53A |       |       |      | NoAmplification              |
| ereB       | 53A |       |       |      | NoAmplification              |
| erm(34)    | 53A |       |       |      | NoAmplification              |
| erm(35)    | 53A |       |       |      | NoAmplification              |
| erm(36)    | 53A | 31.25 | 86.01 | 2.04 |                              |
| ermA       | 53A |       |       |      | NoAmplification              |
| ermA/ermTR | 53A |       |       |      | NoAmplification              |
| ermB       | 53A | 23.58 | 75.24 | 2.06 |                              |
| ermC       | 53A |       |       |      | NoAmplification              |
| ermF       | 53A |       |       |      | NoAmplification              |
| ermJ/ermD  | 53A |       |       |      | NoAmplification              |
| ermK-01    | 53A |       |       |      | NoAmplification              |
| ermK-02    | 53A |       |       |      | NoAmplification              |
| ermT-01    | 53A |       |       |      | NoAmplification              |
| ermT-02    | 53A |       |       |      | NoAmplification              |
| ermX       | 53A |       |       |      | NoAmplification              |
| ermY       | 53A |       |       |      | NoAmplification              |
| fabK       | 53A | 31.1  | 78.65 | 1.99 |                              |
| floR       | 53A |       |       |      | NoAmplification              |
| folA       | 53A |       |       |      | NoAmplification              |
| fosB       | 53A |       |       |      | LowEfficiency, CtIsSmall, S: |
| fosX       | 53A |       |       |      | NoAmplification              |
| fox5       | 53A | 31.65 | 87.81 | 1.91 |                              |
| imiR       | 53A |       |       |      | CurveFitFailed               |
| ImrA-01    | 53A |       |       |      | NoAmplification              |
| intl       | 53A | 35.54 | 84.82 | 1.83 | MultipleMeltPeaks            |
| intl1      | 53A | 24.08 | 87.69 | 1.96 | MultipleMeltPeaks            |
| IS613      | 53A | 30.67 | 79.58 | 2.03 |                              |
| lnuA-01    | 53A |       |       |      | NoAmplification              |
| lnuB-01    | 53A |       |       |      | NoAmplification              |
| lnuB-02    | 53A |       |       |      | NoAmplification              |

|               |     |       |       |      |                   |
|---------------|-----|-------|-------|------|-------------------|
| lnuC          | 53A | 41.22 | 84.27 | 1.39 | MultipleMeltPeaks |
| marR-01       | 53A | 34.17 | 89.62 | 1.84 |                   |
| matA/mel      | 53A | 19.91 | 77.75 | 2.03 |                   |
| mdet1         | 53A |       |       |      | NoAmplification   |
| mdtA          | 53A |       |       |      | NoAmplification   |
| mdtE/yhiU     | 53A |       |       |      | NoAmplification   |
| mecA          | 53A |       |       |      | NoAmplification   |
| mefA          | 53A | 19.15 | 80.64 | 1.94 | MultipleMeltPeaks |
| mepA          | 53A | 33.87 | 77.41 | 2.01 |                   |
| mexA          | 53A |       |       |      | NoAmplification   |
| mexD          | 53A |       |       |      | NoAmplification   |
| mexE          | 53A |       |       |      | CurveFitFailed    |
| mexF          | 53A | 33.72 | 92.59 | 1.97 |                   |
| mphA-01       | 53A | 36.38 | 85.25 | 1.84 |                   |
| mphA-02       | 53A | 34.88 | 88.54 | 1.87 |                   |
| mphB          | 53A |       |       |      | NoAmplification   |
| mphC          | 53A |       |       |      | NoAmplification   |
| msrA-01       | 53A |       |       |      | NoAmplification   |
| msrC-01       | 53A |       |       |      | NoAmplification   |
| mtrC-01       | 53A |       |       |      | NoAmplification   |
| mtrC-02       | 53A |       |       |      | NoAmplification   |
| mtrD-02       | 53A | 30.73 | 81.23 | 1.96 |                   |
| mtrD-03       | 53A | 37.88 | 82.33 | 1.92 |                   |
| NDM1          | 53A |       |       |      | NoAmplification   |
| nimE          | 53A | 38.3  | 75.02 | 1.88 |                   |
| nisB          | 53A |       |       |      | NoAmplification   |
| oleC          | 53A |       |       |      | CurveFitFailed    |
| oprD          | 53A | 32.69 | 90.77 | 1.92 |                   |
| oprJ          | 53A | 30.91 | 89.82 | 1.91 | MultipleMeltPeaks |
| pbp           | 53A |       |       |      | NoAmplification   |
| pbp2x         | 53A |       |       |      | NoAmplification   |
| Pbp5          | 53A |       |       |      | NoAmplification   |
| penA          | 53A |       |       |      | NoAmplification   |
| pikR1         | 53A |       |       |      | NoAmplification   |
| pikR2         | 53A | 36.99 | 85.19 | 1.75 | MultipleMeltPeaks |
| pmrA          | 53A | 26.24 | 79    | 2.02 |                   |
| pncA          | 53A | 27.83 | 89.53 | 1.88 |                   |
| putative mult | 53A |       |       |      | NoAmplification   |
| qac           | 53A |       |       |      | NoAmplification   |
| qacA          | 53A |       |       |      | CurveFitFailed    |
| qacA/qacB     | 53A |       |       |      | NoAmplification   |
| qacEdelta1-0  | 53A |       |       |      | NoAmplification   |
| qacEdelta1-0  | 53A |       |       |      | NoAmplification   |
| qacH-01       | 53A |       |       |      | NoAmplification   |
| qacH-02       | 53A |       |       |      | NoAmplification   |
| qnrA          | 53A | 40.38 | 80.04 | 1.77 |                   |

|              |     |       |       |      |                   |
|--------------|-----|-------|-------|------|-------------------|
| rarD-02      | 53A |       |       |      | NoAmplification   |
| sat4         | 53A |       |       |      | NoAmplification   |
| sdeB         | 53A |       |       |      | NoAmplification   |
| spcN-01      | 53A |       |       |      | NoAmplification   |
| speA         | 53A |       |       |      | NoAmplification   |
| str          | 53A |       |       |      | NoAmplification   |
| strA         | 53A |       |       |      | NoAmplification   |
| strB         | 53A | 29.13 | 83.87 | 1.93 |                   |
| sul1         | 53A |       |       |      | NoAmplification   |
| sul2         | 53A |       |       |      | NoAmplification   |
| sulA/foIP-01 | 53A | 28.46 | 80.42 | 1.92 |                   |
| sulA/foIP-03 | 53A | 22.97 | 83.27 | 1.97 |                   |
| tet(32)      | 53A | 27.84 | 81.23 | 1.97 |                   |
| tet(34)      | 53A | 31.1  | 75.84 | 1.98 |                   |
| tet(35)      | 53A |       |       |      | NoAmplification   |
| tet(36)-A    | 53A |       |       |      | NoAmplification   |
| tet(36)-B    | 53A |       |       |      | NoAmplification   |
| tet(37)      | 53A | 27.05 | 76.7  | 1.98 |                   |
| tetA-01      | 53A | 33.88 | 85.21 | 1.89 |                   |
| tetA-02      | 53A |       |       |      | NoAmplification   |
| tetB-01      | 53A | 27.49 | 79.79 | 1.96 |                   |
| tetB-02      | 53A | 26.27 | 79.64 | 1.98 |                   |
| tetC-01      | 53A | 28.95 | 75.32 | 1.98 |                   |
| tetC-02      | 53A | 26.39 | 76.12 | 2.02 |                   |
| tetD-01      | 53A |       |       |      | NoAmplification   |
| tetD-02      | 53A |       |       |      | NoAmplification   |
| tetE         | 53A |       |       |      | NoAmplification   |
| tetG-01      | 53A | 33.7  | 90    | 1.85 |                   |
| tetG-02      | 53A | 34.88 | 86.89 | 1.91 | MultipleMeltPeaks |
| tetH         | 53A |       |       |      | NoAmplification   |
| tetJ         | 53A |       |       |      | NoAmplification   |
| tetK         | 53A |       |       |      | NoAmplification   |
| tetL-01      | 53A |       |       |      | NoAmplification   |
| tetL-02      | 53A |       |       |      | NoAmplification   |
| tetM-01      | 53A | 20.78 | 76.38 | 1.98 |                   |
| tetM-02      | 53A | 22.59 | 77.61 | 1.96 |                   |
| tetO-01      | 53A | 29.04 | 76.8  | 1.96 |                   |
| tetPA        | 53A |       |       |      | NoAmplification   |
| tetPB-01     | 53A |       |       |      | NoAmplification   |
| tetPB-02     | 53A |       |       |      | NoAmplification   |
| tetPB-03     | 53A |       |       |      | NoAmplification   |
| tetPB-05     | 53A |       |       |      | NoAmplification   |
| tetQ         | 53A | 23.73 | 76.64 | 2.02 |                   |
| tetR-02      | 53A | 31.08 | 88.78 | 1.89 |                   |
| tetR-03      | 53A | 25.17 | 76.35 | 1.98 |                   |
| tetS         | 53A |       |       |      | NoAmplification   |

|             |     |       |       |      |                   |
|-------------|-----|-------|-------|------|-------------------|
| tetT        | 53A |       |       |      | CurveFitFailed    |
| tetU-01     | 53A |       |       |      | NoAmplification   |
| tetV        | 53A |       |       |      | NoAmplification   |
| tetW-01     | 53A | 23.3  | 82.01 | 1.95 |                   |
| tetX        | 53A |       |       |      | NoAmplification   |
| tnpA-01     | 53A |       |       |      | NoAmplification   |
| tnpA-02     | 53A |       |       |      | NoAmplification   |
| tnpA-03     | 53A | 33.07 | 75.57 | 2.16 |                   |
| tnpA-04     | 53A | 33.77 | 77.27 | 1.95 |                   |
| tnpA-05     | 53A |       |       |      | NoAmplification   |
| tnpA-07     | 53A |       |       |      | NoAmplification   |
| tolC-01     | 53A |       |       |      | NoAmplification   |
| tolC-02     | 53A | 33.55 | 81.04 | 1.93 | MultipleMeltPeaks |
| tolC-03     | 53A | 29.1  | 76.32 | 1.94 |                   |
| Tp614       | 53A | 40.04 | 74.41 | 1.75 |                   |
| ttgA        | 53A |       |       |      | NoAmplification   |
| ttgB        | 53A |       |       |      | NoAmplification   |
| vanA        | 53A |       |       |      | NoAmplification   |
| vanB-01     | 53A | 33.73 | 83.9  | 1.95 |                   |
| vanC-01     | 53A |       |       |      | NoAmplification   |
| vanC-02     | 53A |       |       |      | NoAmplification   |
| vanC-03     | 53A | 34.7  | 85.05 | 1.81 |                   |
| vanC1       | 53A |       |       |      | NoAmplification   |
| vanC2/vanC3 | 53A | 38.31 | 83.9  | 1.78 | MultipleMeltPeaks |
| vanG        | 53A |       |       |      | NoAmplification   |
| vanHB       | 53A |       |       |      | CurveFitFailed    |
| vanHD       | 53A |       |       |      | NoAmplification   |
| vanRA-01    | 53A |       |       |      | NoAmplification   |
| vanRA-02    | 53A |       |       |      | NoAmplification   |
| vanRB       | 53A |       |       |      | NoAmplification   |
| vanRC       | 53A |       |       |      | NoAmplification   |
| vanRC4      | 53A |       |       |      | NoAmplification   |
| vanRD       | 53A |       |       |      | NoAmplification   |
| vanSA       | 53A |       |       |      | NoAmplification   |
| vanSB       | 53A | 28.84 | 74.79 | 2.04 |                   |
| vanSC-01    | 53A | 38.97 | 83.22 | 1.92 |                   |
| vanSC-02    | 53A |       |       |      | NoAmplification   |
| vanTC-01    | 53A |       |       |      | NoAmplification   |
| vanTC-02    | 53A | 35.86 | 86.4  | 1.76 |                   |
| vanTE       | 53A |       |       |      | NoAmplification   |
| vanTG       | 53A |       |       |      | NoAmplification   |
| vanWB       | 53A |       |       |      | NoAmplification   |
| vanWG       | 53A | 40.82 | 74    | 1.74 |                   |
| vanXA       | 53A |       |       |      | CurveFitFailed    |
| vanXB       | 53A |       |       |      | NoAmplification   |
| vanXD       | 53A | 31.42 | 75.61 | 1.99 |                   |

|              |     |       |       |      |                 |
|--------------|-----|-------|-------|------|-----------------|
| vanYB        | 53A |       |       |      | NoAmplification |
| vanYD-01     | 53A | 34.05 | 81.31 | 1.79 |                 |
| vanYD-02     | 53A |       |       |      | NoAmplification |
| vatB-01      | 53A |       |       |      | NoAmplification |
| vatB-02      | 53A |       |       |      | NoAmplification |
| vatC-01      | 53A |       |       |      | NoAmplification |
| vatC-02      | 53A |       |       |      | CurveFitFailed  |
| vatE-01      | 53A | 29.21 | 76.6  | 2.09 |                 |
| vatE-02      | 53A |       |       |      | NoAmplification |
| vgaA-01      | 53A |       |       |      | NoAmplification |
| vgaA-02      | 53A |       |       |      | NoAmplification |
| vgb-01       | 53A |       |       |      | NoAmplification |
| vgbB-01      | 53A |       |       |      | NoAmplification |
| vgbB-02      | 53A |       |       |      | NoAmplification |
| yceE/mdtG-0  | 53A |       |       |      | NoAmplification |
| yceE/mdtG-0  | 53A |       |       |      | NoAmplification |
| yceL/mdtH-0  | 53A |       |       |      | CurveFitFailed  |
| yceL/mdtH-0  | 53A |       |       |      | NoAmplification |
| yceL/mdtH-0  | 53A |       |       |      | NoAmplification |
| yidY/mdtL-01 | 53A | 36.3  | 82.46 | 1.81 |                 |
| yidY/mdtL-02 | 53A |       |       |      | NoAmplification |































| Assay          | Sample | Ct | Tm    | Efficiency | flag                   |
|----------------|--------|----|-------|------------|------------------------|
| 16S rRNA       | 53B    |    | 18.76 | 82.24      | 2                      |
| aac            | 53B    |    | 35.31 | 80.91      | 1.51 MultipleMeltPeaks |
| aac(6')-Ib(akz | 53B    |    |       |            | NoAmplification        |
| aac(6')-Ib(akz | 53B    |    | 35.75 | 80.44      | 1.82                   |
| aac(6')-Ib(akz | 53B    |    | 35.91 | 76.24      | 1.88                   |
| aac(6')-II     | 53B    |    | 37.67 | 81.01      | 1.55                   |
| aac(6')I1      | 53B    |    | 38.14 | 63.31      | 1.78 MultipleMeltPeaks |
| aacA/aphD      | 53B    |    |       |            | NoAmplification        |
| aacC           | 53B    |    | 26.24 | 87.61      | 1.76                   |
| aacC1          | 53B    |    |       |            | NoAmplification        |
| aacC2          | 53B    |    |       |            | NoAmplification        |
| aacC4          | 53B    |    | 34.76 | 85.64      | 1.74                   |
| aadA-01        | 53B    |    |       |            | NoAmplification        |
| aadA-02        | 53B    |    | 37.85 | 80.33      | 1.8                    |
| aadA-1-01      | 53B    |    | 36.42 | 76.65      | 1.94 MultipleMeltPeaks |
| aadA-1-02      | 53B    |    |       |            | NoAmplification        |
| aadA1          | 53B    |    | 36.26 | 83.9       | 1.77                   |
| aadA2-01       | 53B    |    |       |            | NoAmplification        |
| aadA2-02       | 53B    |    |       |            | NoAmplification        |
| aadA2-03       | 53B    |    |       |            | NoAmplification        |
| aadA5-01       | 53B    |    | 33.16 | 84.24      | 1.85                   |
| aadA5-02       | 53B    |    | 32.64 | 86.46      | 1.78                   |
| aadA9-01       | 53B    |    |       |            | CurveFitFailed         |
| aadA9-02       | 53B    |    | 31.42 | 77.5       | 1.98                   |
| aadD           | 53B    |    |       |            | NoAmplification        |
| aadE           | 53B    |    |       |            | NoAmplification        |
| acrA-01        | 53B    |    |       |            | NoAmplification        |
| acrA-02        | 53B    |    |       |            | NoAmplification        |
| acrA-03        | 53B    |    |       |            | NoAmplification        |
| acrA-04        | 53B    |    | 30.4  | 80.42      | 1.96                   |
| acrA-05        | 53B    |    | 33.6  | 85.87      | 1.94                   |
| acrB-01        | 53B    |    |       |            | NoAmplification        |
| acrF           | 53B    |    | 34.76 | 81.41      | 1.88 MultipleMeltPeaks |
| acrR-01        | 53B    |    |       |            | CurveFitFailed         |
| acrR-02        | 53B    |    |       |            | NoAmplification        |
| Actin          | 53B    |    | 24.09 | 86.87      | 1.94 MultipleMeltPeaks |
| adeA           | 53B    |    |       |            | NoAmplification        |
| ampC-01        | 53B    |    | 38.1  | 84.45      | 1.75 MultipleMeltPeaks |
| ampC-02        | 53B    |    | 40.6  | 62.85      | 1.82 MultipleMeltPeaks |
| ampC-04        | 53B    |    | 33.68 | 84.03      | 2.07                   |
| ampC-05        | 53B    |    |       |            | NoAmplification        |
| ampC-06        | 53B    |    |       |            | CurveFitFailed         |
| ampC-07        | 53B    |    | 40.97 | 83.63      | 1.68 MultipleMeltPeaks |
| ampC-09        | 53B    |    | 28.83 | 83.4       | 1.94                   |
| ampC/blaDH     | 53B    |    | 33    | 75.88      | 1.94 MultipleMeltPeaks |

|                            |     |       |       |      |                   |
|----------------------------|-----|-------|-------|------|-------------------|
| aph                        | 53B |       |       |      | NoAmplification   |
| aph(2')-Id-01              | 53B |       |       |      | NoAmplification   |
| aph(2')-Id-02              | 53B |       |       |      | NoAmplification   |
| aph6ia                     | 53B |       |       |      | NoAmplification   |
| aphA1(aka k <sub>z</sub> ) | 53B |       |       |      | NoAmplification   |
| bacA-01                    | 53B |       |       |      | NoAmplification   |
| bacA-02                    | 53B | 36.99 | 87.36 | 1.7  |                   |
| BETA-globin                | 53B | 26.82 | 83.97 | 1.99 |                   |
| bla-ACC-1                  | 53B | 31.92 | 85.97 | 1.89 |                   |
| bla-L1                     | 53B | 31.38 | 86.5  | 1.89 |                   |
| bla1                       | 53B |       |       |      | NoAmplification   |
| blaCMY                     | 53B |       |       |      | NoAmplification   |
| blaCMY2-01                 | 53B | 37.74 | 76.66 | 1.95 | MultipleMeltPeaks |
| blaCMY2-02                 | 53B | 31.96 | 84.85 | 1.89 |                   |
| blaCTX-M-01                | 53B | 36.04 | 81.93 | 1.86 |                   |
| blaCTX-M-02                | 53B | 31.2  | 79.87 | 1.89 |                   |
| blaCTX-M-03                | 53B |       |       |      | NoAmplification   |
| blaCTX-M-04                | 53B | 34.13 | 85.11 | 1.85 |                   |
| blaCTX-M-05                | 53B | 30.98 | 76.82 | 1.73 |                   |
| blaCTX-M-06                | 53B |       |       |      | NoAmplification   |
| blaGES                     | 53B |       |       |      | NoAmplification   |
| blaIMP-01                  | 53B |       |       |      | NoAmplification   |
| blaIMP-02                  | 53B | 37.93 | 77.23 | 1.79 | MultipleMeltPeaks |
| blaMOX/blaC                | 53B |       |       |      | CurveFitFailed    |
| blaOCH                     | 53B |       |       |      | NoAmplification   |
| blaOKP                     | 53B |       |       |      | NoAmplification   |
| blaOXA1/blaC               | 53B |       |       |      | NoAmplification   |
| blaOXA10-01                | 53B |       |       |      | NoAmplification   |
| blaOXA10-02                | 53B | 38.44 | 75.26 | 1.85 | MultipleMeltPeaks |
| blaOXY                     | 53B | 29.09 | 86.78 | 1.82 | MultipleMeltPeaks |
| blaPAO                     | 53B |       |       |      | NoAmplification   |
| blaPER                     | 53B | 37.11 | 69.94 | 1.63 |                   |
| blaPSE                     | 53B |       |       |      | NoAmplification   |
| blaROB                     | 53B | 37.93 | 83.06 | 1.85 | MultipleMeltPeaks |
| blaSFO                     | 53B | 28.62 | 85.52 | 2    | MultipleMeltPeaks |
| blaSHV-01                  | 53B | 33.88 | 86.42 | 1.92 |                   |
| blaSHV-02                  | 53B |       |       |      | CurveFitFailed    |
| blaTEM                     | 53B | 37.36 | 81.54 | 1.82 |                   |
| blaTLA                     | 53B |       |       |      | NoAmplification   |
| blaVEB                     | 53B |       |       |      | NoAmplification   |
| blaVIM                     | 53B |       |       |      | NoAmplification   |
| blaZ                       | 53B |       |       |      | NoAmplification   |
| carB                       | 53B |       |       |      | NoAmplification   |
| catA1                      | 53B |       |       |      | NoAmplification   |
| catB3                      | 53B | 35.77 | 79.27 | 1.84 |                   |
| catB8                      | 53B | 29.97 | 84.64 | 1.87 |                   |

|            |     |       |       |      |                              |
|------------|-----|-------|-------|------|------------------------------|
| ceoA       | 53B | 28    | 82.26 | 1.93 |                              |
| cepA       | 53B |       |       |      | NoAmplification              |
| cfiA       | 53B | 33.79 | 86.25 | 1.88 |                              |
| cfr        | 53B |       |       |      | NoAmplification              |
| cfxA       | 53B |       |       |      | CurveFitFailed               |
| cmeA       | 53B | 38    | 85.58 | 1.82 | MultipleMeltPeaks            |
| cmlA1-01   | 53B | 37.79 | 85.66 | 1.81 |                              |
| cmlA1-02   | 53B |       |       |      | NoAmplification              |
| cmr        | 53B | 37.61 | 78.57 | 1.83 |                              |
| cmx(A)     | 53B | 27.31 | 84.82 | 1.92 | MultipleMeltPeaks            |
| cphA-01    | 53B | 31    | 85.59 | 1.88 |                              |
| cphA-02    | 53B |       |       |      | CurveFitFailed               |
| dfrA1      | 53B |       |       |      | NoAmplification              |
| dfrA12     | 53B | 37.99 | 91.2  | 1.64 | MultipleMeltPeaks            |
| emrD       | 53B | 33.4  | 83.9  | 1.92 |                              |
| ereA       | 53B |       |       |      | NoAmplification              |
| ereB       | 53B | 37.66 | 77.98 | 1.73 | MultipleMeltPeaks            |
| erm(34)    | 53B | 37.96 | 87.09 | 1.65 |                              |
| erm(35)    | 53B |       |       |      | NoAmplification              |
| erm(36)    | 53B |       |       |      | CurveFitFailed               |
| ermA       | 53B |       |       |      | NoAmplification              |
| ermA/ermTR | 53B |       |       |      | NoAmplification              |
| ermB       | 53B |       |       |      | NoAmplification              |
| ermC       | 53B | 35.09 | 88.47 | 1.86 |                              |
| ermF       | 53B |       |       |      | NoAmplification              |
| ermJ/ermD  | 53B |       |       |      | NoAmplification              |
| ermK-01    | 53B | 31.93 | 74.95 | 2.03 |                              |
| ermK-02    | 53B | 34.21 | 84.65 | 1.82 |                              |
| ermT-01    | 53B |       |       |      | NoAmplification              |
| ermT-02    | 53B |       |       |      | NoAmplification              |
| ermX       | 53B |       |       |      | NoAmplification              |
| ermY       | 53B |       |       |      | NoAmplification              |
| fabK       | 53B | 28.27 | 79.25 | 2    |                              |
| floR       | 53B |       |       |      | NoAmplification              |
| folA       | 53B |       |       |      | NoAmplification              |
| fosB       | 53B |       |       |      | LowEfficiency, CtIsSmall, S: |
| fosX       | 53B | 39.1  | 72.26 | 1.79 |                              |
| fox5       | 53B | 29.66 | 86.92 | 1.92 |                              |
| imiR       | 53B |       |       |      | CurveFitFailed               |
| ImrA-01    | 53B |       |       |      | NoAmplification              |
| intl       | 53B | 31.46 | 84.72 | 1.94 |                              |
| intl1      | 53B | 21.66 | 87.36 | 1.95 |                              |
| IS613      | 53B |       |       |      | NoAmplification              |
| lnuA-01    | 53B |       |       |      | NoAmplification              |
| lnuB-01    | 53B |       |       |      | NoAmplification              |
| lnuB-02    | 53B |       |       |      | NoAmplification              |

|               |     |       |       |      |                   |
|---------------|-----|-------|-------|------|-------------------|
| lnuC          | 53B | 37.56 | 84.25 | 1.66 |                   |
| marR-01       | 53B | 41.27 | 85.21 | 1.69 |                   |
| matA/mel      | 53B | 24.21 | 77.49 | 2    |                   |
| mdet1         | 53B |       |       |      | NoAmplification   |
| mdtA          | 53B |       |       |      | CurveFitFailed    |
| mdtE/yhiU     | 53B |       |       |      | NoAmplification   |
| mecA          | 53B |       |       |      | NoAmplification   |
| mefA          | 53B | 22.98 | 80.64 | 1.93 |                   |
| mepA          | 53B | 40.34 | 60.77 | 1.55 | MultipleMeltPeaks |
| mexA          | 53B |       |       |      | NoAmplification   |
| mexD          | 53B |       |       |      | NoAmplification   |
| mexE          | 53B |       |       |      | NoAmplification   |
| mexF          | 53B | 31.75 | 82.35 | 1.95 | MultipleMeltPeaks |
| mphA-01       | 53B | 36.26 | 79.61 | 1.88 | MultipleMeltPeaks |
| mphA-02       | 53B | 31.33 | 77.17 | 1.77 | MultipleMeltPeaks |
| mphB          | 53B |       |       |      | CurveFitFailed    |
| mphC          | 53B |       |       |      | NoAmplification   |
| msrA-01       | 53B |       |       |      | NoAmplification   |
| msrC-01       | 53B |       |       |      | NoAmplification   |
| mtrC-01       | 53B | 39.83 | 62.85 | 1.7  | MultipleMeltPeaks |
| mtrC-02       | 53B | 36.28 | 84.23 | 1.86 |                   |
| mtrD-02       | 53B | 20.98 | 80.21 | 2.03 |                   |
| mtrD-03       | 53B | 20.95 | 80.68 | 1.88 |                   |
| NDM1          | 53B |       |       |      | NoAmplification   |
| nimE          | 53B | 34.54 | 75.94 | 2.04 |                   |
| nisB          | 53B |       |       |      | CurveFitFailed    |
| oleC          | 53B | 34.23 | 89.91 | 1.72 |                   |
| oprD          | 53B | 28.11 | 88.24 | 1.97 |                   |
| oprJ          | 53B | 32.33 | 85.89 | 2    | MultipleMeltPeaks |
| pbp           | 53B |       |       |      | NoAmplification   |
| pbp2x         | 53B |       |       |      | NoAmplification   |
| Pbp5          | 53B |       |       |      | NoAmplification   |
| penA          | 53B | 20.71 | 81    | 1.95 |                   |
| pikR1         | 53B | 38.94 | 62.27 | 1.81 | MultipleMeltPeaks |
| pikR2         | 53B | 31.77 | 84.5  | 2.02 |                   |
| pmrA          | 53B | 27.75 | 78.85 | 2.04 |                   |
| pncA          | 53B | 36.3  | 88.3  | 1.79 |                   |
| putative mult | 53B |       |       |      | NoAmplification   |
| qac           | 53B |       |       |      | NoAmplification   |
| qacA          | 53B |       |       |      | CurveFitFailed    |
| qacA/qacB     | 53B |       |       |      | NoAmplification   |
| qacEdelta1-0  | 53B |       |       |      | NoAmplification   |
| qacEdelta1-0  | 53B | 29.1  | 76.63 | 2.01 |                   |
| qacH-01       | 53B | 38.98 | 85.11 | 1.75 | MultipleMeltPeaks |
| qacH-02       | 53B | 37.16 | 83.88 | 1.64 |                   |
| qnrA          | 53B | 35.52 | 84.88 | 1.88 |                   |



|              |     |       |       |      |                   |
|--------------|-----|-------|-------|------|-------------------|
| rarD-02      | 53B |       |       |      | NoAmplification   |
| sat4         | 53B |       |       |      | NoAmplification   |
| sdeB         | 53B |       |       |      | NoAmplification   |
| spcN-01      | 53B |       |       |      | NoAmplification   |
| speA         | 53B |       |       |      | NoAmplification   |
| str          | 53B |       |       |      | NoAmplification   |
| strA         | 53B |       |       |      | NoAmplification   |
| strB         | 53B | 29.16 | 83.14 | 1.93 |                   |
| sul1         | 53B |       |       |      | NoAmplification   |
| sul2         | 53B |       |       |      | NoAmplification   |
| sulA/foIP-01 | 53B |       |       |      | NoAmplification   |
| sulA/foIP-03 | 53B | 26.31 | 82.86 | 2.02 |                   |
| tet(32)      | 53B |       |       |      | NoAmplification   |
| tet(34)      | 53B | 29.65 | 75.91 | 2.01 |                   |
| tet(35)      | 53B |       |       |      | NoAmplification   |
| tet(36)-A    | 53B | 36.14 | 81.92 | 1.84 |                   |
| tet(36)-B    | 53B |       |       |      | NoAmplification   |
| tet(37)      | 53B | 35.36 | 80.37 | 1.87 |                   |
| tetA-01      | 53B | 33.63 | 85.03 | 1.91 |                   |
| tetA-02      | 53B | 42.35 | 83.65 | 1.6  | MultipleMeltPeaks |
| tetB-01      | 53B | 33.2  | 86.03 | 1.93 |                   |
| tetB-02      | 53B | 37.74 | 82.96 | 1.64 | MultipleMeltPeaks |
| tetC-01      | 53B |       |       |      | NoAmplification   |
| tetC-02      | 53B |       |       |      | NoAmplification   |
| tetD-01      | 53B |       |       |      | NoAmplification   |
| tetD-02      | 53B | 35.56 | 76.68 | 1.98 |                   |
| tetE         | 53B |       |       |      | NoAmplification   |
| tetG-01      | 53B |       |       |      | NoAmplification   |
| tetG-02      | 53B | 33.37 | 83.8  | 1.85 | MultipleMeltPeaks |
| tetH         | 53B |       |       |      | NoAmplification   |
| tetJ         | 53B |       |       |      | NoAmplification   |
| tetK         | 53B |       |       |      | NoAmplification   |
| tetL-01      | 53B |       |       |      | NoAmplification   |
| tetL-02      | 53B | 31.92 | 85.19 | 1.84 |                   |
| tetM-01      | 53B | 26.02 | 76.06 | 1.98 |                   |
| tetM-02      | 53B |       |       |      | NoAmplification   |
| tetO-01      | 53B |       |       |      | NoAmplification   |
| tetPA        | 53B |       |       |      | NoAmplification   |
| tetPB-01     | 53B |       |       |      | NoAmplification   |
| tetPB-02     | 53B | 32.67 | 84.73 | 1.94 |                   |
| tetPB-03     | 53B |       |       |      | NoAmplification   |
| tetPB-05     | 53B |       |       |      | NoAmplification   |
| tetQ         | 53B |       |       |      | NoAmplification   |
| tetR-02      | 53B | 33.58 | 85.28 | 1.84 | MultipleMeltPeaks |
| tetR-03      | 53B |       |       |      | NoAmplification   |
| tetS         | 53B | 37.88 | 77.53 | 1.89 |                   |

|             |     |       |       |      |                             |
|-------------|-----|-------|-------|------|-----------------------------|
| tetT        | 53B | 35.34 | 72.5  | 2    |                             |
| tetU-01     | 53B |       |       |      | NoAmplification             |
| tetV        | 53B |       |       |      | NoAmplification             |
| tetW-01     | 53B |       |       |      | NoAmplification             |
| tetX        | 53B |       |       |      | NoAmplification             |
| tnpA-01     | 53B |       |       |      | NoAmplification             |
| tnpA-02     | 53B | 37.7  | 84.41 | 1.64 |                             |
| tnpA-03     | 53B | 34.16 | 74.76 | 2.14 |                             |
| tnpA-04     | 53B |       |       |      | NoAmplification             |
| tnpA-05     | 53B |       |       |      | NoAmplification             |
| tnpA-07     | 53B |       |       |      | NoAmplification             |
| tolC-01     | 53B |       |       |      | CurveFitFailed              |
| tolC-02     | 53B | 30.76 | 87.62 | 1.98 |                             |
| tolC-03     | 53B | 31.96 | 87.07 | 1.92 |                             |
| Tp614       | 53B | 38    | 63.27 | 2.04 | MultipleMeltPeaks           |
| ttgA        | 53B |       |       |      | NoAmplification             |
| ttgB        | 53B | 38.25 | 78.36 | 1.86 | MultipleMeltPeaks           |
| vanA        | 53B |       |       |      | NoAmplification             |
| vanB-01     | 53B | 35.79 | 83.02 | 1.77 |                             |
| vanC-01     | 53B | 34.6  | 73.31 | 2.08 |                             |
| vanC-02     | 53B |       |       |      | NoAmplification             |
| vanC-03     | 53B | 28.38 | 85.88 | 1.88 |                             |
| vanC1       | 53B | 36.42 | 79.32 | 1.82 |                             |
| vanC2/vanC3 | 53B | 37.42 | 81.08 | 1.77 | MultipleMeltPeaks           |
| vanG        | 53B |       |       |      | NoAmplification             |
| vanHB       | 53B | 32.82 | 82.82 | 1.89 |                             |
| vanHD       | 53B |       |       |      | NoAmplification             |
| vanRA-01    | 53B |       |       |      | NoAmplification             |
| vanRA-02    | 53B |       |       |      | NoAmplification             |
| vanRB       | 53B | 37.31 | 87.96 | 1.72 | MultipleMeltPeaks           |
| vanRC       | 53B |       |       |      | NoAmplification             |
| vanRC4      | 53B |       |       |      | NoAmplification             |
| vanRD       | 53B |       |       |      | NoAmplification             |
| vanSA       | 53B |       |       |      | NoAmplification             |
| vanSB       | 53B | 32.16 | 74.37 | 2.08 |                             |
| vanSC-01    | 53B | 37.73 | 77.85 | 1.82 |                             |
| vanSC-02    | 53B |       |       |      | NoAmplification             |
| vanTC-01    | 53B |       |       |      | NoAmplification             |
| vanTC-02    | 53B |       |       |      | CurveFitFailed              |
| vanTE       | 53B |       |       |      | NoAmplification             |
| vanTG       | 53B |       |       |      | NoAmplification             |
| vanWB       | 53B |       |       |      | NoAmplification             |
| vanWG       | 53B | 37.68 | 74.01 | 1.91 |                             |
| vanXA       | 53B |       |       |      | LowEfficiency, CurveFitFail |
| vanXB       | 53B |       |       |      | NoAmplification             |
| vanXD       | 53B | 30.79 | 74.78 | 2.01 |                             |

|              |     |       |       |      |                   |
|--------------|-----|-------|-------|------|-------------------|
| vanYB        | 53B |       |       |      | NoAmplification   |
| vanYD-01     | 53B |       |       |      | CurveFitFailed    |
| vanYD-02     | 53B |       |       |      | NoAmplification   |
| vatB-01      | 53B |       |       |      | NoAmplification   |
| vatB-02      | 53B |       |       |      | NoAmplification   |
| vatC-01      | 53B |       |       |      | NoAmplification   |
| vatC-02      | 53B |       |       |      | NoAmplification   |
| vatE-01      | 53B | 29.61 | 76.67 | 2.14 |                   |
| vatE-02      | 53B |       |       |      | NoAmplification   |
| vgaA-01      | 53B | 38.13 | 75.97 | 1.8  |                   |
| vgaA-02      | 53B |       |       |      | CurveFitFailed    |
| vgb-01       | 53B | 28.23 | 85.24 | 1.88 |                   |
| vgbB-01      | 53B |       |       |      | CurveFitFailed    |
| vgbB-02      | 53B |       |       |      | NoAmplification   |
| yceE/mdtG-0  | 53B |       |       |      | NoAmplification   |
| yceE/mdtG-0  | 53B | 38.07 | 73.67 | 1.82 |                   |
| yceL/mdtH-0  | 53B | 31.98 | 85.07 | 1.91 |                   |
| yceL/mdtH-0  | 53B |       |       |      | NoAmplification   |
| yceL/mdtH-0  | 53B |       |       |      | CurveFitFailed    |
| yidY/mdtL-01 | 53B | 33.75 | 88.58 | 1.85 | MultipleMeltPeaks |
| yidY/mdtL-02 | 53B |       |       |      | NoAmplification   |































| Assay          | Sample | Ct | Tm    | Efficiency | flag                       |
|----------------|--------|----|-------|------------|----------------------------|
| 16S rRNA       | 53C    |    | 15.51 | 82.45      | 1.99                       |
| aac            | 53C    |    | 32.89 | 82.99      | 1.73 MultipleMeltPeaks     |
| aac(6')-Ib(akz | 53C    |    |       |            | NoAmplification            |
| aac(6')-Ib(akz | 53C    |    | 31.93 | 79.45      | 1.96                       |
| aac(6')-Ib(akz | 53C    |    |       |            | CurveFitFailed             |
| aac(6')-II     | 53C    |    | 36.71 | 81.32      | 1.7 MultipleMeltPeaks      |
| aac(6')I1      | 53C    |    |       |            | NoAmplification            |
| aacA/aphD      | 53C    |    |       |            | NoAmplification            |
| aacC           | 53C    |    | 32.16 | 91.96      | 1.87 MultipleMeltPeaks     |
| aacC1          | 53C    |    |       |            | NoAmplification            |
| aacC2          | 53C    |    |       |            | NoAmplification            |
| aacC4          | 53C    |    |       |            | NoAmplification            |
| aadA-01        | 53C    |    | 29.57 | 81.91      | 1.92                       |
| aadA-02        | 53C    |    |       |            | NoAmplification            |
| aadA-1-01      | 53C    |    |       |            | NoAmplification            |
| aadA-1-02      | 53C    |    |       |            | NoAmplification            |
| aadA1          | 53C    |    | 36.61 | 84.2       | 1.84                       |
| aadA2-01       | 53C    |    | 37.8  | 84.89      | 1.7 MultipleMeltPeaks      |
| aadA2-02       | 53C    |    |       |            | NoAmplification            |
| aadA2-03       | 53C    |    |       |            | NoAmplification            |
| aadA5-01       | 53C    |    |       |            | CurveFitFailed             |
| aadA5-02       | 53C    |    |       |            | CurveFitFailed             |
| aadA9-01       | 53C    |    | 27.94 | 82.68      | 1.94                       |
| aadA9-02       | 53C    |    | 28.43 | 82.03      | 1.98                       |
| aadD           | 53C    |    |       |            | NoAmplification            |
| aadE           | 53C    |    |       |            | NoAmplification            |
| acrA-01        | 53C    |    | 32.08 | 82.26      | 2 MultipleMeltPeaks        |
| acrA-02        | 53C    |    |       |            | NoAmplification            |
| acrA-03        | 53C    |    |       |            | BadR2, CtIsLarge, CurveFit |
| acrA-04        | 53C    |    |       |            | CurveFitFailed             |
| acrA-05        | 53C    |    | 31.66 | 83.39      | 1.93                       |
| acrB-01        | 53C    |    | 33.75 | 76.29      | 2.03                       |
| acrF           | 53C    |    | 32.48 | 75.82      | 1.92                       |
| acrR-01        | 53C    |    | 38.55 | 81.62      | 1.88                       |
| acrR-02        | 53C    |    | 40.22 | 81.44      | 1.76 MultipleMeltPeaks     |
| Actin          | 53C    |    | 20.55 | 87.14      | 1.94                       |
| adeA           | 53C    |    |       |            | NoAmplification            |
| ampC-01        | 53C    |    | 31.61 | 86.72      | 1.95 MultipleMeltPeaks     |
| ampC-02        | 53C    |    | 37.6  | 85.85      | 1.8 MultipleMeltPeaks      |
| ampC-04        | 53C    |    | 38.66 | 77.03      | 1.88                       |
| ampC-05        | 53C    |    |       |            | NoAmplification            |
| ampC-06        | 53C    |    |       |            | NoAmplification            |
| ampC-07        | 53C    |    |       |            | NoAmplification            |
| ampC-09        | 53C    |    |       |            | NoAmplification            |
| ampC/blaDH     | 53C    |    | 30.6  | 80.83      | 2 MultipleMeltPeaks        |

|                            |     |       |       |      |                   |
|----------------------------|-----|-------|-------|------|-------------------|
| aph                        | 53C |       |       |      | NoAmplification   |
| aph(2')-Id-01              | 53C |       |       |      | NoAmplification   |
| aph(2')-Id-02              | 53C |       |       |      | NoAmplification   |
| aph6ia                     | 53C |       |       |      | NoAmplification   |
| aphA1(aka k <sub>a</sub> ) | 53C | 25.63 | 76.88 | 2.03 |                   |
| bacA-01                    | 53C |       |       |      | NoAmplification   |
| bacA-02                    | 53C |       |       |      | NoAmplification   |
| BETA-globin                | 53C | 23.09 | 84.05 | 1.96 |                   |
| bla-ACC-1                  | 53C |       |       |      | NoAmplification   |
| bla-L1                     | 53C | 31.17 | 85.07 | 1.94 | MultipleMeltPeaks |
| bla1                       | 53C |       |       |      | NoAmplification   |
| blaCMY                     | 53C | 34.68 | 76.39 | 1.89 |                   |
| blaCMY2-01                 | 53C |       |       |      | NoAmplification   |
| blaCMY2-02                 | 53C | 30.31 | 83.11 | 1.98 |                   |
| blaCTX-M-01                | 53C | 34.19 | 86.72 | 1.96 |                   |
| blaCTX-M-02                | 53C |       |       |      | CurveFitFailed    |
| blaCTX-M-03                | 53C |       |       |      | NoAmplification   |
| blaCTX-M-04                | 53C |       |       |      | CurveFitFailed    |
| blaCTX-M-05                | 53C | 33.83 | 75.95 | 1.75 |                   |
| blaCTX-M-06                | 53C | 36.76 | 85.14 | 1.91 |                   |
| blaGES                     | 53C |       |       |      | NoAmplification   |
| blaIMP-01                  | 53C |       |       |      | NoAmplification   |
| blaIMP-02                  | 53C | 38.39 | 78.44 | 1.79 |                   |
| blaMOX/blaC                | 53C |       |       |      | NoAmplification   |
| blaOCH                     | 53C |       |       |      | NoAmplification   |
| blaOKP                     | 53C |       |       |      | NoAmplification   |
| blaOXA1/blaC               | 53C |       |       |      | NoAmplification   |
| blaOXA10-01                | 53C |       |       |      | NoAmplification   |
| blaOXA10-02                | 53C |       |       |      | NoAmplification   |
| blaOXY                     | 53C |       |       |      | CurveFitFailed    |
| blaPAO                     | 53C |       |       |      | NoAmplification   |
| blaPER                     | 53C |       |       |      | NoAmplification   |
| blaPSE                     | 53C |       |       |      | NoAmplification   |
| blaROB                     | 53C |       |       |      | NoAmplification   |
| blaSFO                     | 53C | 30.44 | 81.09 | 1.87 |                   |
| blaSHV-01                  | 53C |       |       |      | NoAmplification   |
| blaSHV-02                  | 53C |       |       |      | NoAmplification   |
| blaTEM                     | 53C | 27.12 | 79.25 | 2.03 |                   |
| blaTLA                     | 53C |       |       |      | NoAmplification   |
| blaVEB                     | 53C |       |       |      | NoAmplification   |
| blaVIM                     | 53C |       |       |      | NoAmplification   |
| blaZ                       | 53C |       |       |      | NoAmplification   |
| carB                       | 53C |       |       |      | NoAmplification   |
| catA1                      | 53C |       |       |      | NoAmplification   |
| catB3                      | 53C | 30.43 | 87.63 | 1.89 |                   |
| catB8                      | 53C | 29.84 | 83.26 | 1.95 |                   |

|            |     |       |       |      |                              |
|------------|-----|-------|-------|------|------------------------------|
| ceoA       | 53C | 28.72 | 82.33 | 1.98 |                              |
| cepA       | 53C |       |       |      | NoAmplification              |
| cfiA       | 53C |       |       |      | NoAmplification              |
| cfr        | 53C | 32.68 | 76.52 | 1.98 |                              |
| cfxA       | 53C | 25.04 | 77.58 | 2.05 |                              |
| cmeA       | 53C |       |       |      | NoAmplification              |
| cmlA1-01   | 53C |       |       |      | NoAmplification              |
| cmlA1-02   | 53C |       |       |      | NoAmplification              |
| cmr        | 53C |       |       |      | CurveFitFailed               |
| cmx(A)     | 53C | 28.5  | 85.23 | 1.96 |                              |
| cphA-01    | 53C |       |       |      | NoAmplification              |
| cphA-02    | 53C | 33.98 | 77.94 | 1.94 |                              |
| dfrA1      | 53C | 29.58 | 78.73 | 1.96 |                              |
| dfrA12     | 53C |       |       |      | NoAmplification              |
| emrD       | 53C | 34.88 | 75.33 | 1.78 |                              |
| ereA       | 53C |       |       |      | NoAmplification              |
| ereB       | 53C | 34.89 | 74.48 | 2.04 |                              |
| erm(34)    | 53C |       |       |      | NoAmplification              |
| erm(35)    | 53C |       |       |      | NoAmplification              |
| erm(36)    | 53C |       |       |      | NoAmplification              |
| ermA       | 53C |       |       |      | NoAmplification              |
| ermA/ermTR | 53C |       |       |      | NoAmplification              |
| ermB       | 53C | 23.35 | 74.93 | 2.02 |                              |
| ermC       | 53C |       |       |      | NoAmplification              |
| ermF       | 53C | 27.96 | 74.53 | 2    |                              |
| ermJ/ermD  | 53C |       |       |      | NoAmplification              |
| ermK-01    | 53C |       |       |      | NoAmplification              |
| ermK-02    | 53C |       |       |      | NoAmplification              |
| ermT-01    | 53C |       |       |      | NoAmplification              |
| ermT-02    | 53C |       |       |      | NoAmplification              |
| ermX       | 53C |       |       |      | CurveFitFailed               |
| ermY       | 53C |       |       |      | NoAmplification              |
| fabK       | 53C | 23.46 | 77.67 | 2.1  |                              |
| floR       | 53C | 37.08 | 87.65 | 1.7  | MultipleMeltPeaks            |
| folA       | 53C |       |       |      | NoAmplification              |
| fosB       | 53C |       |       |      | LowEfficiency, CtIsSmall, S: |
| fosX       | 53C |       |       |      | NoAmplification              |
| fox5       | 53C | 31.43 | 86.46 | 1.93 |                              |
| imiR       | 53C |       |       |      | NoAmplification              |
| ImrA-01    | 53C |       |       |      | NoAmplification              |
| intl       | 53C | 32.27 | 84.67 | 1.9  |                              |
| intl1      | 53C | 21.96 | 87.21 | 2    |                              |
| IS613      | 53C | 27.37 | 80.73 | 2.09 |                              |
| lnuA-01    | 53C |       |       |      | NoAmplification              |
| lnuB-01    | 53C |       |       |      | NoAmplification              |
| lnuB-02    | 53C |       |       |      | NoAmplification              |

|               |     |       |       |      |                              |
|---------------|-----|-------|-------|------|------------------------------|
| lnuC          | 53C | 37.89 | 73.2  | 1.76 |                              |
| marR-01       | 53C | 37.56 | 84.87 | 1.78 | MultipleMeltPeaks            |
| matA/mel      | 53C | 18.05 | 77.75 | 2.07 |                              |
| mdetI1        | 53C |       |       |      | NoAmplification              |
| mdtA          | 53C | 40.73 | 62.56 | 1.79 | MultipleMeltPeaks            |
| mdtE/yhiU     | 53C |       |       |      | NoAmplification              |
| mecA          | 53C |       |       |      | NoAmplification              |
| mefA          | 53C | 17.99 | 80.53 | 1.98 | MultipleMeltPeaks            |
| mepA          | 53C | 33.13 | 85.09 | 1.95 |                              |
| mexA          | 53C |       |       |      | CtIsLarge, CurveFitFailed    |
| mexD          | 53C | 35.27 | 79.86 | 1.96 |                              |
| mexE          | 53C | 39.08 | 80.91 | 1.75 |                              |
| mexF          | 53C | 31.01 | 87.14 | 1.99 |                              |
| mphA-01       | 53C | 33.43 | 86.07 | 1.98 |                              |
| mphA-02       | 53C | 33.46 | 76.85 | 1.97 |                              |
| mphB          | 53C |       |       |      | NoAmplification              |
| mphC          | 53C | 26.94 | 75.56 | 2    |                              |
| msrA-01       | 53C | 29.82 | 76.55 | 2.01 |                              |
| msrC-01       | 53C |       |       |      | NoAmplification              |
| mtrC-01       | 53C |       |       |      | NoAmplification              |
| mtrC-02       | 53C |       |       |      | NoAmplification              |
| mtrD-02       | 53C | 30.06 | 81.18 | 1.97 |                              |
| mtrD-03       | 53C |       |       |      | CurveFitFailed               |
| NDM1          | 53C |       |       |      | NoAmplification              |
| nimE          | 53C | 38.59 | 61.48 | 2    | MultipleMeltPeaks            |
| nisB          | 53C |       |       |      | NoAmplification              |
| oleC          | 53C | 33.45 | 83.98 | 1.89 |                              |
| oprD          | 53C | 34.22 | 81.73 | 1.88 |                              |
| oprJ          | 53C | 42.35 | 76.73 | 1.76 | MultipleMeltPeaks            |
| pbp           | 53C |       |       |      | LowEfficiency, CtIsSmall, S: |
| pbp2x         | 53C | 21.82 | 76.1  | 2.07 |                              |
| Pbp5          | 53C |       |       |      | NoAmplification              |
| penA          | 53C |       |       |      | NoAmplification              |
| pikR1         | 53C |       |       |      | CurveFitFailed               |
| pikR2         | 53C | 31.36 | 92.01 | 2.03 | MultipleMeltPeaks            |
| pmrA          | 53C | 21.98 | 79.54 | 2.08 |                              |
| pncA          | 53C | 26.67 | 89.53 | 1.89 |                              |
| putative mult | 53C |       |       |      | CurveFitFailed               |
| qac           | 53C |       |       |      | CurveFitFailed               |
| qacA          | 53C |       |       |      | NoAmplification              |
| qacA/qacB     | 53C |       |       |      | NoAmplification              |
| qacEdelta1-0  | 53C |       |       |      | NoAmplification              |
| qacEdelta1-0  | 53C | 31.82 | 77.81 | 1.91 | MultipleMeltPeaks            |
| qacH-01       | 53C | 39.31 | 78.65 | 1.8  | MultipleMeltPeaks            |
| qacH-02       | 53C | 38.54 | 83.91 | 1.57 |                              |
| qnrA          | 53C | 38.25 | 80.57 | 1.8  |                              |

|              |     |       |       |      |                           |
|--------------|-----|-------|-------|------|---------------------------|
| rarD-02      | 53C |       |       |      | NoAmplification           |
| sat4         | 53C |       |       |      | NoAmplification           |
| sdeB         | 53C |       |       |      | CtIsLarge, CurveFitFailed |
| spcN-01      | 53C |       |       |      | NoAmplification           |
| speA         | 53C |       |       |      | NoAmplification           |
| str          | 53C | 22.11 | 72.79 | 1.95 |                           |
| strA         | 53C |       |       |      | NoAmplification           |
| strB         | 53C | 25.4  | 83.72 | 1.94 |                           |
| sul1         | 53C |       |       |      | NoAmplification           |
| sul2         | 53C | 25.12 | 85.93 | 2.02 |                           |
| sulA/folP-01 | 53C | 22.76 | 81.91 | 1.97 |                           |
| sulA/folP-03 | 53C | 19.95 | 83.39 | 2    |                           |
| tet(32)      | 53C |       |       |      | NoAmplification           |
| tet(34)      | 53C | 31.9  | 75.65 | 1.97 |                           |
| tet(35)      | 53C |       |       |      | NoAmplification           |
| tet(36)-A    | 53C |       |       |      | NoAmplification           |
| tet(36)-B    | 53C |       |       |      | NoAmplification           |
| tet(37)      | 53C | 32.24 | 74.78 | 1.95 |                           |
| tetA-01      | 53C | 35.42 | 85.18 | 1.88 |                           |
| tetA-02      | 53C |       |       |      | NoAmplification           |
| tetB-01      | 53C | 28.17 | 79.66 | 1.96 |                           |
| tetB-02      | 53C | 26.14 | 79.87 | 1.99 |                           |
| tetC-01      | 53C | 30.25 | 75.49 | 1.97 |                           |
| tetC-02      | 53C | 26.39 | 76.21 | 2.05 |                           |
| tetD-01      | 53C |       |       |      | NoAmplification           |
| tetD-02      | 53C |       |       |      | NoAmplification           |
| tetE         | 53C |       |       |      | NoAmplification           |
| tetG-01      | 53C | 34.99 | 89.9  | 1.83 |                           |
| tetG-02      | 53C | 29.32 | 86.71 | 1.91 |                           |
| tetH         | 53C | 29.46 | 78.1  | 1.82 |                           |
| tetJ         | 53C |       |       |      | NoAmplification           |
| tetK         | 53C | 22.67 | 72.44 | 2.09 |                           |
| tetL-01      | 53C |       |       |      | NoAmplification           |
| tetL-02      | 53C | 37.88 | 91.53 | 1.76 | MultipleMeltPeaks         |
| tetM-01      | 53C | 21.24 | 75.99 | 1.99 |                           |
| tetM-02      | 53C | 19.48 | 77.51 | 2.02 |                           |
| tetO-01      | 53C |       |       |      | NoAmplification           |
| tetPA        | 53C |       |       |      | NoAmplification           |
| tetPB-01     | 53C |       |       |      | NoAmplification           |
| tetPB-02     | 53C |       |       |      | CurveFitFailed            |
| tetPB-03     | 53C |       |       |      | NoAmplification           |
| tetPB-05     | 53C |       |       |      | CurveFitFailed            |
| tetQ         | 53C | 24.85 | 77.27 | 2.04 |                           |
| tetR-02      | 53C | 28.83 | 85.6  | 1.93 |                           |
| tetR-03      | 53C | 25.37 | 76.3  | 1.99 |                           |
| tetS         | 53C |       |       |      | NoAmplification           |

|             |     |       |       |      |                   |
|-------------|-----|-------|-------|------|-------------------|
| tetT        | 53C |       |       |      | NoAmplification   |
| tetU-01     | 53C |       |       |      | NoAmplification   |
| tetV        | 53C | 40.94 | 73.31 | 1.82 |                   |
| tetW-01     | 53C | 23.27 | 82.03 | 1.97 |                   |
| tetX        | 53C | 29.22 | 75.83 | 2    |                   |
| tnpA-01     | 53C |       |       |      | NoAmplification   |
| tnpA-02     | 53C | 40.46 | 77.95 | 1.7  | MultipleMeltPeaks |
| tnpA-03     | 53C | 29.57 | 76.67 | 2.05 |                   |
| tnpA-04     | 53C | 28.18 | 82.45 | 1.91 |                   |
| tnpA-05     | 53C | 27.3  | 80.84 | 1.91 |                   |
| tnpA-07     | 53C |       |       |      | NoAmplification   |
| tolC-01     | 53C |       |       |      | NoAmplification   |
| tolC-02     | 53C | 34.04 | 83.57 | 1.9  | MultipleMeltPeaks |
| tolC-03     | 53C | 33.25 | 85.65 | 1.9  |                   |
| Tp614       | 53C |       |       |      | CurveFitFailed    |
| ttgA        | 53C |       |       |      | NoAmplification   |
| ttgB        | 53C |       |       |      | CurveFitFailed    |
| vanA        | 53C |       |       |      | NoAmplification   |
| vanB-01     | 53C |       |       |      | CurveFitFailed    |
| vanC-01     | 53C |       |       |      | NoAmplification   |
| vanC-02     | 53C |       |       |      | NoAmplification   |
| vanC-03     | 53C | 28.5  | 87.02 | 1.93 |                   |
| vanC1       | 53C |       |       |      | NoAmplification   |
| vanC2/vanC3 | 53C | 37.8  | 82.67 | 1.83 |                   |
| vanG        | 53C |       |       |      | NoAmplification   |
| vanHB       | 53C | 32.19 | 81.07 | 1.88 | MultipleMeltPeaks |
| vanHD       | 53C | 35.45 | 83.03 | 1.84 |                   |
| vanRA-01    | 53C |       |       |      | NoAmplification   |
| vanRA-02    | 53C |       |       |      | NoAmplification   |
| vanRB       | 53C | 32    | 82.37 | 1.8  |                   |
| vanRC       | 53C |       |       |      | NoAmplification   |
| vanRC4      | 53C |       |       |      | NoAmplification   |
| vanRD       | 53C |       |       |      | NoAmplification   |
| vanSA       | 53C |       |       |      | NoAmplification   |
| vanSB       | 53C | 33.8  | 74.07 | 2.04 |                   |
| vanSC-01    | 53C | 42.06 | 84.03 | 1.7  |                   |
| vanSC-02    | 53C |       |       |      | NoAmplification   |
| vanTC-01    | 53C |       |       |      | NoAmplification   |
| vanTC-02    | 53C | 38.45 | 86.42 | 1.65 |                   |
| vanTE       | 53C | 37.95 | 89    | 1.79 |                   |
| vanTG       | 53C |       |       |      | NoAmplification   |
| vanWB       | 53C |       |       |      | NoAmplification   |
| vanWG       | 53C | 32.25 | 75.05 | 1.98 |                   |
| vanXA       | 53C |       |       |      | NoAmplification   |
| vanXB       | 53C |       |       |      | NoAmplification   |
| vanXD       | 53C | 30.29 | 75.94 | 2.06 |                   |

|              |     |       |       |      |                   |
|--------------|-----|-------|-------|------|-------------------|
| vanYB        | 53C | 30.2  | 79.1  | 1.99 |                   |
| vanYD-01     | 53C | 31.65 | 82.14 | 1.82 | MultipleMeltPeaks |
| vanYD-02     | 53C |       |       |      | NoAmplification   |
| vatB-01      | 53C |       |       |      | NoAmplification   |
| vatB-02      | 53C |       |       |      | NoAmplification   |
| vatC-01      | 53C |       |       |      | NoAmplification   |
| vatC-02      | 53C | 38.02 | 87.49 | 1.95 | MultipleMeltPeaks |
| vatE-01      | 53C | 30.55 | 76.57 | 2.09 |                   |
| vatE-02      | 53C |       |       |      | NoAmplification   |
| vgaA-01      | 53C |       |       |      | NoAmplification   |
| vgaA-02      | 53C |       |       |      | CurveFitFailed    |
| vgb-01       | 53C | 41.3  | 74.5  | 1.77 |                   |
| vgbB-01      | 53C |       |       |      | NoAmplification   |
| vgbB-02      | 53C |       |       |      | NoAmplification   |
| yceE/mdtG-0  | 53C |       |       |      | CurveFitFailed    |
| yceE/mdtG-0  | 53C |       |       |      | NoAmplification   |
| yceL/mdtH-0  | 53C | 34.94 | 85.18 | 1.81 | MultipleMeltPeaks |
| yceL/mdtH-0  | 53C |       |       |      | NoAmplification   |
| yceL/mdtH-0  | 53C |       |       |      | NoAmplification   |
| yidY/mdtL-01 | 53C |       |       |      | NoAmplification   |
| yidY/mdtL-02 | 53C |       |       |      | NoAmplification   |































| Assay          | Sample | Ct | Tm    | Efficiency | flag                   |
|----------------|--------|----|-------|------------|------------------------|
| 16S rRNA       | 54A    |    | 17.68 | 81.46      | 2.07                   |
| aac            | 54A    |    | 29.79 | 81.24      | 1.64 MultipleMeltPeaks |
| aac(6')-Ib(akz | 54A    |    |       |            | NoAmplification        |
| aac(6')-Ib(akz | 54A    |    | 29.89 | 86.07      | 1.95                   |
| aac(6')-Ib(akz | 54A    |    | 28.77 | 89.9       | 1.97 MultipleMeltPeaks |
| aac(6')-II     | 54A    |    | 32.78 | 84.47      | 1.68 MultipleMeltPeaks |
| aac(6')I1      | 54A    |    | 41.28 | 88.29      | 1.63 MultipleMeltPeaks |
| aacA/aphD      | 54A    |    |       |            | NoAmplification        |
| aacC           | 54A    |    | 32.12 | 91.91      | 1.92                   |
| aacC1          | 54A    |    |       |            | NoAmplification        |
| aacC2          | 54A    |    |       |            | NoAmplification        |
| aacC4          | 54A    |    | 32.46 | 78.51      | 1.91                   |
| aadA-01        | 54A    |    |       |            | NoAmplification        |
| aadA-02        | 54A    |    | 32.6  | 80.41      | 1.97                   |
| aadA-1-01      | 54A    |    | 37.39 | 75.56      | 1.87 MultipleMeltPeaks |
| aadA-1-02      | 54A    |    |       |            | NoAmplification        |
| aadA1          | 54A    |    | 30.6  | 83.85      | 1.95                   |
| aadA2-01       | 54A    |    |       |            | CurveFitFailed         |
| aadA2-02       | 54A    |    | 30.77 | 75.51      | 1.99                   |
| aadA2-03       | 54A    |    |       |            | NoAmplification        |
| aadA5-01       | 54A    |    | 33.44 | 88.65      | 1.91                   |
| aadA5-02       | 54A    |    | 31.81 | 83.24      | 1.97 MultipleMeltPeaks |
| aadA9-01       | 54A    |    | 34.5  | 88.4       | 1.88                   |
| aadA9-02       | 54A    |    | 40.54 | 79.47      | 1.88                   |
| aadD           | 54A    |    |       |            | NoAmplification        |
| aadE           | 54A    |    |       |            | NoAmplification        |
| acrA-01        | 54A    |    | 30.67 | 88.97      | 1.93                   |
| acrA-02        | 54A    |    | 40.6  | 87.01      | 1.73 MultipleMeltPeaks |
| acrA-03        | 54A    |    | 29.46 | 78.33      | 1.9                    |
| acrA-04        | 54A    |    | 32.68 | 82.2       | 2                      |
| acrA-05        | 54A    |    | 30.4  | 80.28      | 1.93 MultipleMeltPeaks |
| acrB-01        | 54A    |    |       |            | NoAmplification        |
| acrF           | 54A    |    | 32.11 | 81.74      | 1.85                   |
| acrR-01        | 54A    |    |       |            | NoAmplification        |
| acrR-02        | 54A    |    | 32.19 | 83.11      | 1.94 MultipleMeltPeaks |
| Actin          | 54A    |    | 19.48 | 87.15      | 1.96                   |
| adeA           | 54A    |    |       |            | NoAmplification        |
| ampC-01        | 54A    |    | 31.63 | 85.08      | 1.96                   |
| ampC-02        | 54A    |    |       |            | NoAmplification        |
| ampC-04        | 54A    |    | 31.55 | 78.83      | 1.86                   |
| ampC-05        | 54A    |    |       |            | NoAmplification        |
| ampC-06        | 54A    |    | 36.78 | 84.06      | 1.84                   |
| ampC-07        | 54A    |    | 34.71 | 88.57      | 1.84                   |
| ampC-09        | 54A    |    |       |            | NoAmplification        |
| ampC/blaDH     | 54A    |    | 27.78 | 84.42      | 2                      |

|                            |     |       |       |      |                   |
|----------------------------|-----|-------|-------|------|-------------------|
| aph                        | 54A |       |       |      | NoAmplification   |
| aph(2')-Id-01              | 54A |       |       |      | NoAmplification   |
| aph(2')-Id-02              | 54A |       |       |      | NoAmplification   |
| aph6ia                     | 54A | 35.16 | 75.69 | 1.92 | MultipleMeltPeaks |
| aphA1(aka k <sub>z</sub> ) | 54A |       |       |      | NoAmplification   |
| bacA-01                    | 54A | 38.44 | 73.34 | 1.83 | MultipleMeltPeaks |
| bacA-02                    | 54A | 34.17 | 85.66 | 1.86 | MultipleMeltPeaks |
| BETA-globin                | 54A | 22.87 | 83.93 | 2    |                   |
| bla-ACC-1                  | 54A | 37.58 | 85.92 | 1.73 |                   |
| bla-L1                     | 54A | 27.14 | 85.96 | 1.98 |                   |
| bla1                       | 54A |       |       |      | NoAmplification   |
| blaCMY                     | 54A |       |       |      | CurveFitFailed    |
| blaCMY2-01                 | 54A |       |       |      | NoAmplification   |
| blaCMY2-02                 | 54A | 28.08 | 87.15 | 2    |                   |
| blaCTX-M-01                | 54A | 37.6  | 86.68 | 1.74 |                   |
| blaCTX-M-02                | 54A | 32.06 | 79.68 | 1.86 | MultipleMeltPeaks |
| blaCTX-M-03                | 54A |       |       |      | NoAmplification   |
| blaCTX-M-04                | 54A | 40.65 | 81.76 | 1.73 | MultipleMeltPeaks |
| blaCTX-M-05                | 54A | 33.36 | 76.42 | 1.78 |                   |
| blaCTX-M-06                | 54A |       |       |      | CurveFitFailed    |
| blaGES                     | 54A |       |       |      | NoAmplification   |
| blaIMP-01                  | 54A |       |       |      | NoAmplification   |
| blaIMP-02                  | 54A | 35.31 | 77.92 | 1.95 |                   |
| blaMOX/blaC                | 54A | 35.68 | 88.23 | 1.81 |                   |
| blaOCH                     | 54A |       |       |      | NoAmplification   |
| blaOKP                     | 54A |       |       |      | NoAmplification   |
| blaOXA1/blaC               | 54A |       |       |      | NoAmplification   |
| blaOXA10-01                | 54A | 37.74 | 78.84 | 1.86 |                   |
| blaOXA10-02                | 54A |       |       |      | NoAmplification   |
| blaOXY                     | 54A | 36.61 | 89.33 | 1.7  |                   |
| blaPAO                     | 54A |       |       |      | NoAmplification   |
| blaPER                     | 54A | 36.84 | 81.24 | 1.82 |                   |
| blaPSE                     | 54A |       |       |      | NoAmplification   |
| blaROB                     | 54A |       |       |      | NoAmplification   |
| blaSFO                     | 54A | 32.82 | 83.9  | 1.98 | MultipleMeltPeaks |
| blaSHV-01                  | 54A | 35.43 | 86.4  | 1.66 | MultipleMeltPeaks |
| blaSHV-02                  | 54A |       |       |      | NoAmplification   |
| blaTEM                     | 54A | 34.37 | 85.76 | 1.92 | MultipleMeltPeaks |
| blaTLA                     | 54A |       |       |      | NoAmplification   |
| blaVEB                     | 54A |       |       |      | NoAmplification   |
| blaVIM                     | 54A |       |       |      | NoAmplification   |
| blaZ                       | 54A |       |       |      | NoAmplification   |
| carB                       | 54A |       |       |      | NoAmplification   |
| catA1                      | 54A |       |       |      | NoAmplification   |
| catB3                      | 54A | 34.18 | 79.62 | 1.86 |                   |
| catB8                      | 54A | 25.53 | 84.7  | 1.93 | MultipleMeltPeaks |

|            |     |       |       |      |                              |
|------------|-----|-------|-------|------|------------------------------|
| ceoA       | 54A | 26.33 | 82.27 | 1.97 | MultipleMeltPeaks            |
| cepA       | 54A | 36.09 | 84.8  | 1.88 |                              |
| cfiA       | 54A | 33.68 | 85.83 | 1.86 |                              |
| cfr        | 54A |       |       |      | CurveFitFailed               |
| cfxA       | 54A |       |       |      | NoAmplification              |
| cmeA       | 54A | 37.82 | 84.72 | 1.8  | MultipleMeltPeaks            |
| cmlA1-01   | 54A |       |       |      | NoAmplification              |
| cmlA1-02   | 54A |       |       |      | NoAmplification              |
| cmr        | 54A |       |       |      | CurveFitFailed               |
| cmx(A)     | 54A | 25.59 | 84.56 | 1.99 |                              |
| cphA-01    | 54A | 32.05 | 85.27 | 1.95 |                              |
| cphA-02    | 54A | 34.86 | 82.13 | 1.88 | MultipleMeltPeaks            |
| dfrA1      | 54A | 35.29 | 79.61 | 1.88 |                              |
| dfrA12     | 54A | 38.14 | 82.5  | 1.72 |                              |
| emrD       | 54A | 40.48 | 79.74 | 1.68 | MultipleMeltPeaks            |
| ereA       | 54A | 34.01 | 82.44 | 1.96 |                              |
| ereB       | 54A | 33.01 | 88.43 | 2.1  | MultipleMeltPeaks            |
| erm(34)    | 54A |       |       |      | NoAmplification              |
| erm(35)    | 54A |       |       |      | NoAmplification              |
| erm(36)    | 54A | 33.37 | 84.37 | 1.79 | MultipleMeltPeaks            |
| ermA       | 54A |       |       |      | NoAmplification              |
| ermA/ermTR | 54A |       |       |      | NoAmplification              |
| ermB       | 54A |       |       |      | NoAmplification              |
| ermC       | 54A |       |       |      | NoAmplification              |
| ermF       | 54A |       |       |      | NoAmplification              |
| ermJ/ermD  | 54A |       |       |      | NoAmplification              |
| ermK-01    | 54A | 38.03 | 81.27 | 1.92 |                              |
| ermK-02    | 54A |       |       |      | CurveFitFailed               |
| ermT-01    | 54A |       |       |      | NoAmplification              |
| ermT-02    | 54A |       |       |      | NoAmplification              |
| ermX       | 54A | 35.07 | 86.38 | 1.66 |                              |
| ermY       | 54A |       |       |      | NoAmplification              |
| fabK       | 54A | 27.19 | 79.27 | 2.15 |                              |
| floR       | 54A |       |       |      | NoAmplification              |
| folA       | 54A |       |       |      | NoAmplification              |
| fosB       | 54A |       |       |      | LowEfficiency, CtIsSmall, S: |
| fosX       | 54A |       |       |      | NoAmplification              |
| fox5       | 54A | 27.74 | 86.68 | 1.99 |                              |
| imiR       | 54A |       |       |      | NoAmplification              |
| ImrA-01    | 54A | 35.43 | 79.96 | 1.93 |                              |
| intl       | 54A | 29.05 | 84.97 | 1.97 |                              |
| intl1      | 54A | 19.57 | 87.31 | 1.95 |                              |
| IS613      | 54A |       |       |      | NoAmplification              |
| lnuA-01    | 54A |       |       |      | NoAmplification              |
| lnuB-01    | 54A |       |       |      | NoAmplification              |
| lnuB-02    | 54A |       |       |      | NoAmplification              |

|               |     |       |       |      |                   |
|---------------|-----|-------|-------|------|-------------------|
| lnuC          | 54A | 35.46 | 84.34 | 1.79 | MultipleMeltPeaks |
| marR-01       | 54A | 29.79 | 85.31 | 1.94 |                   |
| matA/mel      | 54A | 28.2  | 77.12 | 2.04 | MultipleMeltPeaks |
| mdetI1        | 54A |       |       |      | NoAmplification   |
| mdtA          | 54A | 32.34 | 81.83 | 1.98 |                   |
| mdtE/yhiU     | 54A | 37.68 | 83.5  | 1.79 |                   |
| mecA          | 54A |       |       |      | NoAmplification   |
| mefA          | 54A | 26.72 | 80.48 | 2    |                   |
| mepA          | 54A | 37.8  | 79.39 | 1.76 | MultipleMeltPeaks |
| mexA          | 54A |       |       |      | NoAmplification   |
| mexD          | 54A | 31.85 | 80.27 | 2.01 |                   |
| mexE          | 54A |       |       |      | NoAmplification   |
| mexF          | 54A | 28.78 | 80.87 | 2.05 | MultipleMeltPeaks |
| mphA-01       | 54A | 32.57 | 86.78 | 2    |                   |
| mphA-02       | 54A | 29.15 | 83.81 | 2.13 | MultipleMeltPeaks |
| mphB          | 54A | 36.19 | 82.88 | 1.8  |                   |
| mphC          | 54A |       |       |      | NoAmplification   |
| msrA-01       | 54A |       |       |      | NoAmplification   |
| msrC-01       | 54A |       |       |      | NoAmplification   |
| mtrC-01       | 54A |       |       |      | NoAmplification   |
| mtrC-02       | 54A | 33.58 | 84.27 | 1.97 |                   |
| mtrD-02       | 54A | 28.65 | 80.85 | 1.77 |                   |
| mtrD-03       | 54A |       |       |      | CurveFitFailed    |
| NDM1          | 54A |       |       |      | NoAmplification   |
| nimE          | 54A | 37.92 | 75.04 | 1.91 |                   |
| nisB          | 54A |       |       |      | NoAmplification   |
| oleC          | 54A | 37.72 | 82.31 | 1.77 |                   |
| oprD          | 54A | 29.27 | 81.84 | 1.91 | MultipleMeltPeaks |
| oprJ          | 54A |       |       |      | NoAmplification   |
| pbp           | 54A | 39.28 | 81.53 | 1.79 |                   |
| pbp2x         | 54A |       |       |      | NoAmplification   |
| Pbp5          | 54A |       |       |      | NoAmplification   |
| penA          | 54A | 36.82 | 88.21 | 1.69 |                   |
| pikR1         | 54A | 36.17 | 79.81 | 1.86 |                   |
| pikR2         | 54A | 28.96 | 84.7  | 1.99 |                   |
| pmrA          | 54A |       |       |      | NoAmplification   |
| pncA          | 54A | 37.08 | 84.04 | 1.83 | MultipleMeltPeaks |
| putative mult | 54A | 29.93 | 84.06 | 1.96 |                   |
| qac           | 54A | 37.42 | 79.6  | 1.79 | MultipleMeltPeaks |
| qacA          | 54A | 33.58 | 70.46 | 1.83 |                   |
| qacA/qacB     | 54A |       |       |      | NoAmplification   |
| qacEdelta1-0  | 54A |       |       |      | NoAmplification   |
| qacEdelta1-0  | 54A | 28.2  | 76.53 | 1.9  | MultipleMeltPeaks |
| qacH-01       | 54A | 33.14 | 86.18 | 1.98 |                   |
| qacH-02       | 54A | 35.25 | 83.93 | 1.64 |                   |
| qnrA          | 54A | 32.92 | 85.06 | 1.98 |                   |



|              |     |       |       |      |                           |
|--------------|-----|-------|-------|------|---------------------------|
| rarD-02      | 54A |       |       |      | NoAmplification           |
| sat4         | 54A |       |       |      | NoAmplification           |
| sdeB         | 54A |       |       |      | NoAmplification           |
| spcN-01      | 54A |       |       |      | CtIsLarge, CurveFitFailed |
| speA         | 54A |       |       |      | NoAmplification           |
| str          | 54A |       |       |      | NoAmplification           |
| strA         | 54A |       |       |      | NoAmplification           |
| strB         | 54A | 38.23 | 84.15 | 1.8  | MultipleMeltPeaks         |
| sul1         | 54A | 34.01 | 89.85 | 1.79 |                           |
| sul2         | 54A |       |       |      | NoAmplification           |
| sulA/foIP-01 | 54A | 36.03 | 76.68 | 1.92 |                           |
| sulA/foIP-03 | 54A | 29.49 | 82.86 | 1.94 |                           |
| tet(32)      | 54A |       |       |      | NoAmplification           |
| tet(34)      | 54A | 31.35 | 75.67 | 1.95 |                           |
| tet(35)      | 54A |       |       |      | NoAmplification           |
| tet(36)-A    | 54A |       |       |      | NoAmplification           |
| tet(36)-B    | 54A |       |       |      | NoAmplification           |
| tet(37)      | 54A | 33.43 | 81.81 | 1.93 | MultipleMeltPeaks         |
| tetA-01      | 54A | 30.11 | 85.1  | 1.9  |                           |
| tetA-02      | 54A | 36.07 | 79.7  | 1.76 | MultipleMeltPeaks         |
| tetB-01      | 54A | 32.51 | 86.05 | 2.01 |                           |
| tetB-02      | 54A | 38.81 | 74.66 | 1.84 |                           |
| tetC-01      | 54A |       |       |      | NoAmplification           |
| tetC-02      | 54A | 38.13 | 78.65 | 2.04 | MultipleMeltPeaks         |
| tetD-01      | 54A |       |       |      | NoAmplification           |
| tetD-02      | 54A | 36.46 | 84.74 | 1.83 | MultipleMeltPeaks         |
| tetE         | 54A |       |       |      | NoAmplification           |
| tetG-01      | 54A | 32.88 | 82.4  | 2.04 |                           |
| tetG-02      | 54A |       |       |      | NoAmplification           |
| tetH         | 54A |       |       |      | NoAmplification           |
| tetJ         | 54A |       |       |      | NoAmplification           |
| tetK         | 54A |       |       |      | NoAmplification           |
| tetL-01      | 54A |       |       |      | NoAmplification           |
| tetL-02      | 54A | 36.5  | 85.26 | 1.63 |                           |
| tetM-01      | 54A | 38.54 | 78.61 | 1.86 |                           |
| tetM-02      | 54A |       |       |      | NoAmplification           |
| tetO-01      | 54A |       |       |      | NoAmplification           |
| tetPA        | 54A |       |       |      | NoAmplification           |
| tetPB-01     | 54A |       |       |      | NoAmplification           |
| tetPB-02     | 54A | 31.52 | 84.79 | 2    |                           |
| tetPB-03     | 54A |       |       |      | NoAmplification           |
| tetPB-05     | 54A |       |       |      | NoAmplification           |
| tetQ         | 54A |       |       |      | NoAmplification           |
| tetR-02      | 54A | 31.02 | 88.82 | 1.76 | MultipleMeltPeaks         |
| tetR-03      | 54A |       |       |      | NoAmplification           |
| tetS         | 54A | 37.65 | 85.36 | 1.85 | MultipleMeltPeaks         |

|             |     |       |       |      |                   |
|-------------|-----|-------|-------|------|-------------------|
| tetT        | 54A | 33.5  | 74.14 | 2.07 |                   |
| tetU-01     | 54A |       |       |      | NoAmplification   |
| tetV        | 54A | 35.98 | 86.9  | 1.72 | MultipleMeltPeaks |
| tetW-01     | 54A |       |       |      | NoAmplification   |
| tetX        | 54A |       |       |      | NoAmplification   |
| tnpA-01     | 54A | 35.12 | 83.74 | 1.89 |                   |
| tnpA-02     | 54A | 33.83 | 84.74 | 1.72 |                   |
| tnpA-03     | 54A | 24.23 | 77.45 | 2.08 |                   |
| tnpA-04     | 54A | 32.07 | 87.85 | 1.87 |                   |
| tnpA-05     | 54A |       |       |      | NoAmplification   |
| tnpA-07     | 54A |       |       |      | NoAmplification   |
| tolC-01     | 54A |       |       |      | NoAmplification   |
| tolC-02     | 54A | 31    | 87.6  | 1.98 | MultipleMeltPeaks |
| tolC-03     | 54A | 31.2  | 86.76 | 1.97 | MultipleMeltPeaks |
| Tp614       | 54A | 35.63 | 78.29 | 1.86 | MultipleMeltPeaks |
| ttgA        | 54A | 39.31 | 83.54 | 1.72 |                   |
| ttgB        | 54A | 34.65 | 84.14 | 1.96 | MultipleMeltPeaks |
| vanA        | 54A |       |       |      | NoAmplification   |
| vanB-01     | 54A | 35.01 | 83.9  | 1.88 |                   |
| vanC-01     | 54A |       |       |      | NoAmplification   |
| vanC-02     | 54A |       |       |      | NoAmplification   |
| vanC-03     | 54A | 25.16 | 86.45 | 1.94 |                   |
| vanC1       | 54A |       |       |      | NoAmplification   |
| vanC2/vanC3 | 54A | 31.27 | 84.63 | 1.97 |                   |
| vanG        | 54A |       |       |      | NoAmplification   |
| vanHB       | 54A |       |       |      | NoAmplification   |
| vanHD       | 54A | 33.73 | 85.2  | 1.88 |                   |
| vanRA-01    | 54A |       |       |      | NoAmplification   |
| vanRA-02    | 54A |       |       |      | NoAmplification   |
| vanRB       | 54A | 30.93 | 85.48 | 1.99 |                   |
| vanRC       | 54A |       |       |      | NoAmplification   |
| vanRC4      | 54A |       |       |      | NoAmplification   |
| vanRD       | 54A |       |       |      | NoAmplification   |
| vanSA       | 54A |       |       |      | NoAmplification   |
| vanSB       | 54A | 29    | 74.73 | 2.1  |                   |
| vanSC-01    | 54A | 33.11 | 84.02 | 2.01 |                   |
| vanSC-02    | 54A |       |       |      | NoAmplification   |
| vanTC-01    | 54A |       |       |      | NoAmplification   |
| vanTC-02    | 54A |       |       |      | NoAmplification   |
| vanTE       | 54A |       |       |      | NoAmplification   |
| vanTG       | 54A | 33.97 | 74.67 | 2.04 |                   |
| vanWB       | 54A |       |       |      | NoAmplification   |
| vanWG       | 54A | 37.14 | 79.52 | 1.8  | MultipleMeltPeaks |
| vanXA       | 54A | 34.9  | 79.9  | 1.98 |                   |
| vanXB       | 54A |       |       |      | NoAmplification   |
| vanXD       | 54A | 30.42 | 75.67 | 2.03 |                   |

|              |     |       |       |      |                   |
|--------------|-----|-------|-------|------|-------------------|
| vanYB        | 54A | 33.5  | 87.9  | 2.01 | MultipleMeltPeaks |
| vanYD-01     | 54A | 28.94 | 85.05 | 1.87 | MultipleMeltPeaks |
| vanYD-02     | 54A |       |       |      | CurveFitFailed    |
| vatB-01      | 54A | 30.55 | 75.26 | 2.04 |                   |
| vatB-02      | 54A | 32.75 | 81.73 | 2.03 |                   |
| vatC-01      | 54A | 37.19 | 81.26 | 1.86 |                   |
| vatC-02      | 54A | 35.75 | 83.17 | 1.84 | MultipleMeltPeaks |
| vatE-01      | 54A | 31.23 | 76.63 | 2.08 |                   |
| vatE-02      | 54A |       |       |      | NoAmplification   |
| vgaA-01      | 54A |       |       |      | NoAmplification   |
| vgaA-02      | 54A |       |       |      | CurveFitFailed    |
| vgb-01       | 54A | 31.76 | 76.48 | 1.95 |                   |
| vgbB-01      | 54A |       |       |      | CurveFitFailed    |
| vgbB-02      | 54A |       |       |      | NoAmplification   |
| yceE/mdtG-0  | 54A |       |       |      | CurveFitFailed    |
| yceE/mdtG-0  | 54A |       |       |      | NoAmplification   |
| yceL/mdtH-0  | 54A | 29.93 | 85.16 | 1.98 | MultipleMeltPeaks |
| yceL/mdtH-0  | 54A |       |       |      | NoAmplification   |
| yceL/mdtH-0  | 54A | 33.03 | 81.5  | 1.95 |                   |
| yidY/mdtL-01 | 54A | 29.46 | 87.24 | 2    | MultipleMeltPeaks |
| yidY/mdtL-02 | 54A |       |       |      | NoAmplification   |































| Assay          | Sample | Ct | Tm    | Efficiency | flag                      |
|----------------|--------|----|-------|------------|---------------------------|
| 16S rRNA       | 54B    |    | 17.06 | 82.32      | 2.02                      |
| aac            | 54B    |    | 31.47 | 83.36      | 1.51 MultipleMeltPeaks    |
| aac(6')-Ib(akz | 54B    |    | 38.72 | 80.89      | 1.86                      |
| aac(6')-Ib(akz | 54B    |    | 29.52 | 86.15      | 1.98                      |
| aac(6')-Ib(akz | 54B    |    | 32.49 | 87.22      | 1.94 MultipleMeltPeaks    |
| aac(6')-II     | 54B    |    | 34.67 | 88.83      | 1.81                      |
| aac(6')I1      | 54B    |    | 38.61 | 88.63      | 1.69                      |
| aacA/aphD      | 54B    |    |       |            | NoAmplification           |
| aacC           | 54B    |    | 31.85 | 92.35      | 1.96 MultipleMeltPeaks    |
| aacC1          | 54B    |    | 29.52 | 81.8       | 1.9                       |
| aacC2          | 54B    |    |       |            | NoAmplification           |
| aacC4          | 54B    |    | 31.94 | 87.06      | 1.74                      |
| aadA-01        | 54B    |    |       |            | NoAmplification           |
| aadA-02        | 54B    |    |       |            | CurveFitFailed            |
| aadA-1-01      | 54B    |    | 37.65 | 81.31      | 1.86 MultipleMeltPeaks    |
| aadA-1-02      | 54B    |    |       |            | NoAmplification           |
| aadA1          | 54B    |    | 34.75 | 84.73      | 1.92 MultipleMeltPeaks    |
| aadA2-01       | 54B    |    |       |            | CurveFitFailed            |
| aadA2-02       | 54B    |    | 31.66 | 75.43      | 1.97                      |
| aadA2-03       | 54B    |    |       |            | CurveFitFailed            |
| aadA5-01       | 54B    |    | 34.23 | 84.72      | 1.96                      |
| aadA5-02       | 54B    |    | 32.53 | 77.92      | 2.02 MultipleMeltPeaks    |
| aadA9-01       | 54B    |    | 35.53 | 80.33      | 1.92                      |
| aadA9-02       | 54B    |    |       |            | NoAmplification           |
| aadD           | 54B    |    |       |            | NoAmplification           |
| aadE           | 54B    |    |       |            | NoAmplification           |
| acrA-01        | 54B    |    | 32.11 | 88.8       | 1.92                      |
| acrA-02        | 54B    |    | 38.13 | 82.9       | 1.88                      |
| acrA-03        | 54B    |    |       |            | CtIsLarge, CurveFitFailed |
| acrA-04        | 54B    |    | 32.21 | 80.5       | 1.97                      |
| acrA-05        | 54B    |    | 30.85 | 88.05      | 1.93 MultipleMeltPeaks    |
| acrB-01        | 54B    |    |       |            | NoAmplification           |
| acrF           | 54B    |    | 34.45 | 84.64      | 1.89                      |
| acrR-01        | 54B    |    | 35.33 | 81.21      | 1.88                      |
| acrR-02        | 54B    |    | 33.45 | 86.76      | 1.91                      |
| Actin          | 54B    |    | 22.75 | 87.18      | 1.93                      |
| adeA           | 54B    |    |       |            | NoAmplification           |
| ampC-01        | 54B    |    | 32.6  | 78.49      | 1.96 MultipleMeltPeaks    |
| ampC-02        | 54B    |    | 33.82 | 77.73      | 2.07                      |
| ampC-04        | 54B    |    | 34.15 | 80.16      | 2 MultipleMeltPeaks       |
| ampC-05        | 54B    |    |       |            | NoAmplification           |
| ampC-06        | 54B    |    | 34.58 | 77         | 1.94 MultipleMeltPeaks    |
| ampC-07        | 54B    |    | 35.02 | 88.57      | 1.85 MultipleMeltPeaks    |
| ampC-09        | 54B    |    |       |            | NoAmplification           |
| ampC/blaDH     | 54B    |    | 29.19 | 85.13      | 1.94                      |

|                            |     |       |       |      |                   |
|----------------------------|-----|-------|-------|------|-------------------|
| aph                        | 54B |       |       |      | NoAmplification   |
| aph(2')-Id-01              | 54B |       |       |      | NoAmplification   |
| aph(2')-Id-02              | 54B |       |       |      | NoAmplification   |
| aph6ia                     | 54B | 26.86 | 78.04 | 1.97 |                   |
| aphA1(aka k <sub>a</sub> ) | 54B | 28.42 | 76.4  | 2.08 |                   |
| bacA-01                    | 54B | 38.03 | 87.82 | 1.86 | MultipleMeltPeaks |
| bacA-02                    | 54B | 38.17 | 81.83 | 1.68 | MultipleMeltPeaks |
| BETA-globin                | 54B | 21.21 | 84.04 | 2    |                   |
| bla-ACC-1                  | 54B |       |       |      | CurveFitFailed    |
| bla-L1                     | 54B | 28.3  | 85.45 | 2.01 |                   |
| bla1                       | 54B |       |       |      | NoAmplification   |
| blaCMY                     | 54B | 35.7  | 79.85 | 1.9  |                   |
| blaCMY2-01                 | 54B |       |       |      | NoAmplification   |
| blaCMY2-02                 | 54B | 28.45 | 85.84 | 2.03 | MultipleMeltPeaks |
| blaCTX-M-01                | 54B | 36.01 | 76.43 | 1.53 | MultipleMeltPeaks |
| blaCTX-M-02                | 54B | 31.02 | 83.99 | 1.93 |                   |
| blaCTX-M-03                | 54B |       |       |      | NoAmplification   |
| blaCTX-M-04                | 54B | 35.32 | 88.32 | 1.84 |                   |
| blaCTX-M-05                | 54B | 31.47 | 76.9  | 1.82 |                   |
| blaCTX-M-06                | 54B |       |       |      | NoAmplification   |
| blaGES                     | 54B |       |       |      | NoAmplification   |
| blaIMP-01                  | 54B |       |       |      | NoAmplification   |
| blaIMP-02                  | 54B | 38.36 | 76.83 | 1.92 |                   |
| blaMOX/blaC                | 54B |       |       |      | NoAmplification   |
| blaOCH                     | 54B |       |       |      | NoAmplification   |
| blaOKP                     | 54B |       |       |      | NoAmplification   |
| blaOXA1/blaC               | 54B |       |       |      | NoAmplification   |
| blaOXA10-01                | 54B |       |       |      | NoAmplification   |
| blaOXA10-02                | 54B |       |       |      | NoAmplification   |
| blaOXY                     | 54B | 44.31 | 76.76 | 1.6  | MultipleMeltPeaks |
| blaPAO                     | 54B |       |       |      | NoAmplification   |
| blaPER                     | 54B | 43.28 | 78.33 | 1.74 | MultipleMeltPeaks |
| blaPSE                     | 54B |       |       |      | NoAmplification   |
| blaROB                     | 54B |       |       |      | NoAmplification   |
| blaSFO                     | 54B | 34.83 | 84.57 | 1.9  | MultipleMeltPeaks |
| blaSHV-01                  | 54B | 35.41 | 87.35 | 1.74 |                   |
| blaSHV-02                  | 54B |       |       |      | NoAmplification   |
| blaTEM                     | 54B | 24.56 | 79.63 | 2.01 |                   |
| blaTLA                     | 54B |       |       |      | NoAmplification   |
| blaVEB                     | 54B |       |       |      | NoAmplification   |
| blaVIM                     | 54B | 38.09 | 87.52 | 1.81 |                   |
| blaZ                       | 54B | 24.28 | 74.66 | 2.01 |                   |
| carB                       | 54B |       |       |      | NoAmplification   |
| catA1                      | 54B |       |       |      | NoAmplification   |
| catB3                      | 54B | 37.79 | 81.17 | 1.77 |                   |
| catB8                      | 54B | 31.78 | 81.83 | 1.94 |                   |

|            |     |       |       |      |                              |
|------------|-----|-------|-------|------|------------------------------|
| ceoA       | 54B | 27.65 | 87.87 | 2.03 |                              |
| cepA       | 54B |       |       |      | NoAmplification              |
| cfiA       | 54B | 34.29 | 85.62 | 1.91 | MultipleMeltPeaks            |
| cfr        | 54B |       |       |      | NoAmplification              |
| cfxA       | 54B | 22.24 | 77.18 | 1.42 |                              |
| cmeA       | 54B |       |       |      | NoAmplification              |
| cmlA1-01   | 54B |       |       |      | NoAmplification              |
| cmlA1-02   | 54B |       |       |      | NoAmplification              |
| cmr        | 54B | 38.06 | 78.65 | 1.77 |                              |
| cmx(A)     | 54B | 27.44 | 84.84 | 1.87 | MultipleMeltPeaks            |
| cphA-01    | 54B | 32.02 | 85.89 | 1.94 |                              |
| cphA-02    | 54B | 33.93 | 82.79 | 1.92 |                              |
| dfrA1      | 54B | 33.15 | 82.82 | 2.02 |                              |
| dfrA12     | 54B |       |       |      | CurveFitFailed               |
| emrD       | 54B | 34.5  | 87.58 | 1.79 |                              |
| ereA       | 54B | 37.75 | 83.41 | 1.97 |                              |
| ereB       | 54B | 38.32 | 83.93 | 1.77 |                              |
| erm(34)    | 54B |       |       |      | CurveFitFailed               |
| erm(35)    | 54B |       |       |      | NoAmplification              |
| erm(36)    | 54B | 34.18 | 85.99 | 2.25 |                              |
| ermA       | 54B |       |       |      | NoAmplification              |
| ermA/ermTR | 54B |       |       |      | NoAmplification              |
| ermB       | 54B |       |       |      | NoAmplification              |
| ermC       | 54B | 26.87 | 75.82 | 2.09 |                              |
| ermF       | 54B |       |       |      | NoAmplification              |
| ermJ/ermD  | 54B |       |       |      | NoAmplification              |
| ermK-01    | 54B | 39.15 | 75.47 | 1.88 |                              |
| ermK-02    | 54B | 40.07 | 81.17 | 1.61 | MultipleMeltPeaks            |
| ermT-01    | 54B |       |       |      | NoAmplification              |
| ermT-02    | 54B |       |       |      | NoAmplification              |
| ermX       | 54B |       |       |      | CurveFitFailed               |
| ermY       | 54B |       |       |      | NoAmplification              |
| fabK       | 54B | 28.67 | 79.29 | 2.12 |                              |
| floR       | 54B | 33.44 | 79.1  | 1.94 |                              |
| folA       | 54B |       |       |      | NoAmplification              |
| fosB       | 54B |       |       |      | LowEfficiency, CtIsSmall, S: |
| fosX       | 54B |       |       |      | NoAmplification              |
| fox5       | 54B | 27.24 | 87.87 | 1.97 |                              |
| imiR       | 54B |       |       |      | CurveFitFailed               |
| ImrA-01    | 54B |       |       |      | NoAmplification              |
| intl       | 54B | 31.17 | 84.77 | 1.91 | MultipleMeltPeaks            |
| intl1      | 54B | 21.78 | 87.31 | 1.9  |                              |
| IS613      | 54B |       |       |      | NoAmplification              |
| lnuA-01    | 54B |       |       |      | NoAmplification              |
| lnuB-01    | 54B |       |       |      | NoAmplification              |
| lnuB-02    | 54B |       |       |      | NoAmplification              |

|               |     |       |       |      |                             |
|---------------|-----|-------|-------|------|-----------------------------|
| lnuC          | 54B |       |       |      | CurveFitFailed              |
| marR-01       | 54B | 31.24 | 85.45 | 1.9  |                             |
| matA/mel      | 54B | 18.91 | 77.46 | 1.97 |                             |
| mdet1         | 54B |       |       |      | NoAmplification             |
| mdtA          | 54B |       |       |      | NoAmplification             |
| mdtE/yhiU     | 54B | 40.6  | 67.32 | 1.74 | MultipleMeltPeaks           |
| mecA          | 54B | 26.3  | 74.86 | 2.02 |                             |
| mefA          | 54B | 18.69 | 80.52 | 2    |                             |
| mepA          | 54B | 32.8  | 84.9  | 1.86 | MultipleMeltPeaks           |
| mexA          | 54B | 38.46 | 81.78 | 1.87 |                             |
| mexD          | 54B | 38.08 | 79.62 | 1.85 |                             |
| mexE          | 54B |       |       |      | NoAmplification             |
| mexF          | 54B | 30.55 | 87.27 | 2.02 | MultipleMeltPeaks           |
| mphA-01       | 54B | 29.74 | 86.71 | 1.98 |                             |
| mphA-02       | 54B | 32.56 | 82.62 | 1.85 |                             |
| mphB          | 54B |       |       |      | BadR2, CtlsLarge, CurveFitf |
| mphC          | 54B | 39.31 | 76.09 | 1.83 |                             |
| msrA-01       | 54B | 25.11 | 76.66 | 2.04 |                             |
| msrC-01       | 54B |       |       |      | NoAmplification             |
| mtrC-01       | 54B |       |       |      | NoAmplification             |
| mtrC-02       | 54B | 35.78 | 84.3  | 1.89 |                             |
| mtrD-02       | 54B | 29.62 | 80.91 | 1.91 |                             |
| mtrD-03       | 54B |       |       |      | NoAmplification             |
| NDM1          | 54B |       |       |      | NoAmplification             |
| nimE          | 54B |       |       |      | NoAmplification             |
| nisB          | 54B |       |       |      | NoAmplification             |
| oleC          | 54B | 34.39 | 89.6  | 1.88 |                             |
| oprD          | 54B | 30.52 | 86.69 | 1.94 | MultipleMeltPeaks           |
| oprJ          | 54B | 32.78 | 91.55 | 1.91 |                             |
| pbp           | 54B |       |       |      | CurveFitFailed              |
| pbp2x         | 54B |       |       |      | NoAmplification             |
| Pbp5          | 54B |       |       |      | NoAmplification             |
| penA          | 54B | 38.12 | 87.05 | 1.62 | MultipleMeltPeaks           |
| pikR1         | 54B |       |       |      | CurveFitFailed              |
| pikR2         | 54B | 32.02 | 84.63 | 2    | MultipleMeltPeaks           |
| pmrA          | 54B |       |       |      | NoAmplification             |
| pncA          | 54B | 32.23 | 88.5  | 1.92 |                             |
| putative mult | 54B |       |       |      | CurveFitFailed              |
| qac           | 54B | 38.93 | 62.68 | 1.8  | MultipleMeltPeaks           |
| qacA          | 54B | 29.43 | 80.84 | 2.02 |                             |
| qacA/qacB     | 54B |       |       |      | NoAmplification             |
| qacEdelta1-0  | 54B |       |       |      | NoAmplification             |
| qacEdelta1-0  | 54B | 26.58 | 77.98 | 1.94 |                             |
| qacH-01       | 54B | 32.3  | 86.51 | 1.99 |                             |
| qacH-02       | 54B | 36.15 | 83.93 | 1.6  |                             |
| qnrA          | 54B | 35.45 | 86.43 | 1.88 |                             |

|              |     |       |       |      |                   |
|--------------|-----|-------|-------|------|-------------------|
| rarD-02      | 54B |       |       |      | NoAmplification   |
| sat4         | 54B |       |       |      | NoAmplification   |
| sdeB         | 54B |       |       |      | NoAmplification   |
| spcN-01      | 54B | 39    | 85.11 | 1.81 | MultipleMeltPeaks |
| speA         | 54B |       |       |      | NoAmplification   |
| str          | 54B |       |       |      | NoAmplification   |
| strA         | 54B |       |       |      | NoAmplification   |
| strB         | 54B | 29.39 | 83.24 | 1.93 |                   |
| sul1         | 54B | 36.92 | 85.2  | 1.63 | MultipleMeltPeaks |
| sul2         | 54B | 25.65 | 75.11 | 1.73 |                   |
| sulA/foIP-01 | 54B | 32.36 | 76.42 | 2.02 |                   |
| sulA/foIP-03 | 54B | 28.47 | 83.03 | 1.98 |                   |
| tet(32)      | 54B |       |       |      | NoAmplification   |
| tet(34)      | 54B | 31.48 | 75.93 | 2    |                   |
| tet(35)      | 54B | 34.34 | 76.27 | 2.01 |                   |
| tet(36)-A    | 54B |       |       |      | NoAmplification   |
| tet(36)-B    | 54B |       |       |      | NoAmplification   |
| tet(37)      | 54B | 20.26 | 76.46 | 1.97 |                   |
| tetA-01      | 54B | 32.42 | 85.08 | 1.97 |                   |
| tetA-02      | 54B | 36.58 | 87.59 | 1.78 |                   |
| tetB-01      | 54B | 34.01 | 86.21 | 1.97 |                   |
| tetB-02      | 54B | 37.57 | 74.29 | 1.88 |                   |
| tetC-01      | 54B |       |       |      | NoAmplification   |
| tetC-02      | 54B |       |       |      | NoAmplification   |
| tetD-01      | 54B |       |       |      | NoAmplification   |
| tetD-02      | 54B | 35.8  | 83.22 | 1.89 | MultipleMeltPeaks |
| tetE         | 54B |       |       |      | NoAmplification   |
| tetG-01      | 54B | 36.02 | 82.16 | 1.8  |                   |
| tetG-02      | 54B | 39.64 | 82.24 | 1.78 |                   |
| tetH         | 54B |       |       |      | NoAmplification   |
| tetJ         | 54B |       |       |      | NoAmplification   |
| tetK         | 54B |       |       |      | NoAmplification   |
| tetL-01      | 54B |       |       |      | NoAmplification   |
| tetL-02      | 54B | 38.78 | 85.37 | 1.62 |                   |
| tetM-01      | 54B |       |       |      | NoAmplification   |
| tetM-02      | 54B |       |       |      | NoAmplification   |
| tetO-01      | 54B |       |       |      | NoAmplification   |
| tetPA        | 54B |       |       |      | NoAmplification   |
| tetPB-01     | 54B |       |       |      | NoAmplification   |
| tetPB-02     | 54B | 29.55 | 84.87 | 2.02 |                   |
| tetPB-03     | 54B |       |       |      | NoAmplification   |
| tetPB-05     | 54B |       |       |      | NoAmplification   |
| tetQ         | 54B | 29.27 | 76.66 | 2.04 |                   |
| tetR-02      | 54B | 31.89 | 82.05 | 1.93 | MultipleMeltPeaks |
| tetR-03      | 54B |       |       |      | NoAmplification   |
| tetS         | 54B | 33.71 | 85.31 | 1.98 |                   |

|             |     |       |       |      |                              |
|-------------|-----|-------|-------|------|------------------------------|
| tetT        | 54B |       |       |      | NoAmplification              |
| tetU-01     | 54B |       |       |      | NoAmplification              |
| tetV        | 54B |       |       |      | NoAmplification              |
| tetW-01     | 54B | 29.73 | 81.66 | 1.97 |                              |
| tetX        | 54B |       |       |      | NoAmplification              |
| tnpA-01     | 54B |       |       |      | NoAmplification              |
| tnpA-02     | 54B | 36.61 | 84.66 | 1.75 |                              |
| tnpA-03     | 54B | 22.28 | 77.54 | 2.09 |                              |
| tnpA-04     | 54B | 30.55 | 82.24 | 1.88 |                              |
| tnpA-05     | 54B |       |       |      | NoAmplification              |
| tnpA-07     | 54B | 39.1  | 75.5  | 1.8  |                              |
| tolC-01     | 54B |       |       |      | CtIsLarge, CurveFitFailed    |
| tolC-02     | 54B | 32.43 | 83.66 | 1.95 | MultipleMeltPeaks            |
| tolC-03     | 54B |       |       |      | NoAmplification              |
| Tp614       | 54B |       |       |      | NoAmplification              |
| ttgA        | 54B |       |       |      | NoAmplification              |
| ttgB        | 54B |       |       |      | NoAmplification              |
| vanA        | 54B |       |       |      | NoAmplification              |
| vanB-01     | 54B | 32.48 | 83.93 | 2.05 | MultipleMeltPeaks            |
| vanC-01     | 54B |       |       |      | LowEfficiency, CtIsSmall, Ci |
| vanC-02     | 54B |       |       |      | NoAmplification              |
| vanC-03     | 54B | 25.9  | 86.85 | 1.95 | MultipleMeltPeaks            |
| vanC1       | 54B |       |       |      | NoAmplification              |
| vanC2/vanC3 | 54B | 32.34 | 84.65 | 1.81 |                              |
| vanG        | 54B |       |       |      | BadR2, CtIsSmall, Saturatio  |
| vanHB       | 54B |       |       |      | NoAmplification              |
| vanHD       | 54B | 38.8  | 83.94 | 1.66 |                              |
| vanRA-01    | 54B |       |       |      | NoAmplification              |
| vanRA-02    | 54B |       |       |      | NoAmplification              |
| vanRB       | 54B | 31.28 | 85.59 | 1.97 |                              |
| vanRC       | 54B |       |       |      | NoAmplification              |
| vanRC4      | 54B |       |       |      | NoAmplification              |
| vanRD       | 54B |       |       |      | NoAmplification              |
| vanSA       | 54B |       |       |      | NoAmplification              |
| vanSB       | 54B | 30.19 | 74.55 | 2.08 |                              |
| vanSC-01    | 54B | 37.82 | 84.29 | 1.72 |                              |
| vanSC-02    | 54B |       |       |      | NoAmplification              |
| vanTC-01    | 54B |       |       |      | NoAmplification              |
| vanTC-02    | 54B |       |       |      | NoAmplification              |
| vanTE       | 54B | 34.92 | 81.68 | 1.9  |                              |
| vanTG       | 54B |       |       |      | NoAmplification              |
| vanWB       | 54B |       |       |      | NoAmplification              |
| vanWG       | 54B |       |       |      | CurveFitFailed               |
| vanXA       | 54B |       |       |      | CurveFitFailed               |
| vanXB       | 54B |       |       |      | NoAmplification              |
| vanXD       | 54B | 30.7  | 75.47 | 2.03 |                              |

|              |     |       |       |      |                             |
|--------------|-----|-------|-------|------|-----------------------------|
| vanYB        | 54B | 31.64 | 81.45 | 1.94 |                             |
| vanYD-01     | 54B | 29.81 | 87.02 | 1.87 | MultipleMeltPeaks           |
| vanYD-02     | 54B |       |       |      | NoAmplification             |
| vatB-01      | 54B |       |       |      | NoAmplification             |
| vatB-02      | 54B | 37.77 | 77.81 | 1.83 |                             |
| vatC-01      | 54B | 36.49 | 81.26 | 1.88 |                             |
| vatC-02      | 54B | 37.92 | 86.32 | 1.75 |                             |
| vatE-01      | 54B | 31.15 | 76.08 | 1.8  |                             |
| vatE-02      | 54B |       |       |      | NoAmplification             |
| vgaA-01      | 54B |       |       |      | NoAmplification             |
| vgaA-02      | 54B |       |       |      | BadR2, LowEfficiency, CtIs5 |
| vgb-01       | 54B | 33.22 | 76.12 | 1.96 |                             |
| vgbB-01      | 54B | 44.85 | 61.31 | 1.52 | MultipleMeltPeaks           |
| vgbB-02      | 54B |       |       |      | NoAmplification             |
| yceE/mdtG-0  | 54B |       |       |      | NoAmplification             |
| yceE/mdtG-0  | 54B |       |       |      | NoAmplification             |
| yceL/mdtH-0  | 54B | 35.68 | 85.44 | 1.79 | MultipleMeltPeaks           |
| yceL/mdtH-0  | 54B |       |       |      | NoAmplification             |
| yceL/mdtH-0  | 54B | 38.45 | 81.26 | 1.75 | MultipleMeltPeaks           |
| yidY/mdtL-01 | 54B | 34.64 | 82.66 | 1.93 |                             |
| yidY/mdtL-02 | 54B | 41.61 | 67.1  | 1.62 | MultipleMeltPeaks           |































| Assay          | Sample | Ct | Tm    | Efficiency | flag                            |
|----------------|--------|----|-------|------------|---------------------------------|
| 16S rRNA       | 54C    |    | 18.67 | 82.33      | 1.99                            |
| aac            | 54C    |    | 31.76 | 81.46      | 1.95 MultipleMeltPeaks          |
| aac(6')-Ib(akz | 54C    |    |       |            | CurveFitFailed                  |
| aac(6')-Ib(akz | 54C    |    | 35.94 | 76.87      | 1.84 MultipleMeltPeaks          |
| aac(6')-Ib(akz | 54C    |    | 31.6  | 78.95      | 1.97                            |
| aac(6')-II     | 54C    |    | 33.18 | 81.59      | 1.84                            |
| aac(6')I1      | 54C    |    | 37.12 | 88.68      | 1.73                            |
| aacA/aphD      | 54C    |    |       |            | NoAmplification                 |
| aacC           | 54C    |    | 33.37 | 73.1       | 1.64                            |
| aacC1          | 54C    |    |       |            | NoAmplification                 |
| aacC2          | 54C    |    |       |            | NoAmplification                 |
| aacC4          | 54C    |    | 32.48 | 83.43      | 1.87 MultipleMeltPeaks          |
| aadA-01        | 54C    |    |       |            | NoAmplification                 |
| aadA-02        | 54C    |    |       |            | CtIsLarge, CurveFitFailed       |
| aadA-1-01      | 54C    |    | 36.34 | 73.5       | 1.93                            |
| aadA-1-02      | 54C    |    |       |            | NoAmplification                 |
| aadA1          | 54C    |    | 39.67 | 81.24      | 1.79 MultipleMeltPeaks          |
| aadA2-01       | 54C    |    |       |            | CurveFitFailed                  |
| aadA2-02       | 54C    |    | 33.99 | 74.32      | 1.86 MultipleMeltPeaks          |
| aadA2-03       | 54C    |    |       |            | NoAmplification                 |
| aadA5-01       | 54C    |    |       |            | CurveFitFailed                  |
| aadA5-02       | 54C    |    | 36.37 | 88.01      | 1.83 MultipleMeltPeaks          |
| aadA9-01       | 54C    |    | 37.89 | 80.22      | 1.77 MultipleMeltPeaks          |
| aadA9-02       | 54C    |    | 42.78 | 73.69      | 1.76 MultipleMeltPeaks          |
| aadD           | 54C    |    |       |            | NoAmplification                 |
| aadE           | 54C    |    |       |            | NoAmplification                 |
| acrA-01        | 54C    |    | 33.73 | 88.73      | 1.9                             |
| acrA-02        | 54C    |    | 39.9  | 84.63      | 1.75 MultipleMeltPeaks          |
| acrA-03        | 54C    |    |       |            | NoAmplification                 |
| acrA-04        | 54C    |    | 33.73 | 80.33      | 1.99                            |
| acrA-05        | 54C    |    | 32.81 | 79.69      | 1.94 MultipleMeltPeaks          |
| acrB-01        | 54C    |    |       |            | NoAmplification                 |
| acrF           | 54C    |    | 30.21 | 81.93      | 2.04                            |
| acrR-01        | 54C    |    | 33.19 | 87.1       | 1.91 MultipleMeltPeaks          |
| acrR-02        | 54C    |    | 37.24 | 88         | 2.37 BadR2, MultipleMeltPeaks   |
| Actin          | 54C    |    | 23.81 | 87.12      | 1.92                            |
| adeA           | 54C    |    | 29.34 | 80.63      | 1.95                            |
| ampC-01        | 54C    |    | 35.03 | 80.74      | 1.89 MultipleMeltPeaks          |
| ampC-02        | 54C    |    | 36.6  | 61.46      | 2.76 SaturationBaselineRatiolsL |
| ampC-04        | 54C    |    | 37.81 | 77.63      | 1.76 MultipleMeltPeaks          |
| ampC-05        | 54C    |    |       |            | NoAmplification                 |
| ampC-06        | 54C    |    |       |            | NoAmplification                 |
| ampC-07        | 54C    |    |       |            | NoAmplification                 |
| ampC-09        | 54C    |    |       |            | NoAmplification                 |
| ampC/blaDH     | 54C    |    | 29.58 | 85.12      | 1.95 MultipleMeltPeaks          |

|                            |     |       |       |      |                   |
|----------------------------|-----|-------|-------|------|-------------------|
| aph                        | 54C |       |       |      | NoAmplification   |
| aph(2')-Id-01              | 54C |       |       |      | NoAmplification   |
| aph(2')-Id-02              | 54C |       |       |      | NoAmplification   |
| aph6ia                     | 54C |       |       |      | NoAmplification   |
| aphA1(aka k <sub>z</sub> ) | 54C |       |       |      | NoAmplification   |
| bacA-01                    | 54C |       |       |      | NoAmplification   |
| bacA-02                    | 54C |       |       |      | CurveFitFailed    |
| BETA-globin                | 54C | 24.43 | 84.04 | 1.99 |                   |
| bla-ACC-1                  | 54C |       |       |      | CurveFitFailed    |
| bla-L1                     | 54C | 31.03 | 87.16 | 1.91 |                   |
| bla1                       | 54C |       |       |      | NoAmplification   |
| blaCMY                     | 54C | 37.67 | 61.76 | 2.09 | MultipleMeltPeaks |
| blaCMY2-01                 | 54C |       |       |      | NoAmplification   |
| blaCMY2-02                 | 54C | 30.71 | 83.74 | 1.99 |                   |
| blaCTX-M-01                | 54C |       |       |      | NoAmplification   |
| blaCTX-M-02                | 54C | 35.91 | 79.83 | 1.77 |                   |
| blaCTX-M-03                | 54C |       |       |      | NoAmplification   |
| blaCTX-M-04                | 54C | 35.81 | 76.68 | 1.94 |                   |
| blaCTX-M-05                | 54C | 35.11 | 76.31 | 1.64 |                   |
| blaCTX-M-06                | 54C | 36.97 | 77.39 | 1.91 |                   |
| blaGES                     | 54C |       |       |      | NoAmplification   |
| blaIMP-01                  | 54C |       |       |      | NoAmplification   |
| blaIMP-02                  | 54C | 40.66 | 79.3  | 1.72 |                   |
| blaMOX/blaC                | 54C | 36.11 | 81.95 | 1.88 |                   |
| blaOCH                     | 54C |       |       |      | NoAmplification   |
| blaOKP                     | 54C |       |       |      | NoAmplification   |
| blaOXA1/blaC               | 54C |       |       |      | NoAmplification   |
| blaOXA10-01                | 54C |       |       |      | NoAmplification   |
| blaOXA10-02                | 54C |       |       |      | NoAmplification   |
| blaOXY                     | 54C |       |       |      | NoAmplification   |
| blaPAO                     | 54C | 37.56 | 85.86 | 1.76 |                   |
| blaPER                     | 54C |       |       |      | NoAmplification   |
| blaPSE                     | 54C |       |       |      | NoAmplification   |
| blaROB                     | 54C | 43.73 | 63.32 | 1.63 | MultipleMeltPeaks |
| blaSFO                     | 54C | 34.12 | 80.37 | 1.92 |                   |
| blaSHV-01                  | 54C |       |       |      | NoAmplification   |
| blaSHV-02                  | 54C | 36.55 | 81.78 | 1.87 |                   |
| blaTEM                     | 54C |       |       |      | NoAmplification   |
| blaTLA                     | 54C |       |       |      | NoAmplification   |
| blaVEB                     | 54C |       |       |      | NoAmplification   |
| blaVIM                     | 54C |       |       |      | NoAmplification   |
| blaZ                       | 54C |       |       |      | NoAmplification   |
| carB                       | 54C |       |       |      | NoAmplification   |
| catA1                      | 54C |       |       |      | NoAmplification   |
| catB3                      | 54C |       |       |      | NoAmplification   |
| catB8                      | 54C | 33.05 | 84.62 | 1.85 |                   |

|            |     |       |       |      |                               |
|------------|-----|-------|-------|------|-------------------------------|
| ceoA       | 54C | 28.31 | 82.3  | 1.98 |                               |
| cepA       | 54C |       |       |      | NoAmplification               |
| cfiA       | 54C | 35.97 | 88.03 | 1.89 | MultipleMeltPeaks             |
| cfr        | 54C |       |       |      | LowEfficiency, CtlIsSmall, S: |
| cfxA       | 54C |       |       |      | NoAmplification               |
| cmeA       | 54C | 42.44 | 78.79 | 1.66 |                               |
| cmlA1-01   | 54C | 34.26 | 84.82 | 1.9  | MultipleMeltPeaks             |
| cmlA1-02   | 54C |       |       |      | NoAmplification               |
| cmr        | 54C |       |       |      | CurveFitFailed                |
| cmx(A)     | 54C | 27.77 | 84.45 | 2    |                               |
| cphA-01    | 54C | 35.89 | 85.5  | 1.84 | MultipleMeltPeaks             |
| cphA-02    | 54C | 38.86 | 82.83 | 1.72 |                               |
| dfrA1      | 54C |       |       |      | NoAmplification               |
| dfrA12     | 54C | 37.89 | 85.85 | 1.64 |                               |
| emrD       | 54C | 38.92 | 87.55 | 1.69 |                               |
| ereA       | 54C |       |       |      | NoAmplification               |
| ereB       | 54C |       |       |      | CurveFitFailed                |
| erm(34)    | 54C |       |       |      | NoAmplification               |
| erm(35)    | 54C |       |       |      | NoAmplification               |
| erm(36)    | 54C | 38.88 | 81.9  | 1.75 |                               |
| ermA       | 54C |       |       |      | NoAmplification               |
| ermA/ermTR | 54C |       |       |      | NoAmplification               |
| ermB       | 54C |       |       |      | NoAmplification               |
| ermC       | 54C | 34.4  | 88.44 | 1.96 |                               |
| ermF       | 54C |       |       |      | NoAmplification               |
| ermJ/ermD  | 54C |       |       |      | NoAmplification               |
| ermK-01    | 54C |       |       |      | BadR2, CtlIsLarge, CurveFitI  |
| ermK-02    | 54C |       |       |      | NoAmplification               |
| ermT-01    | 54C |       |       |      | NoAmplification               |
| ermT-02    | 54C |       |       |      | NoAmplification               |
| ermX       | 54C | 28.18 | 83.15 | 1.89 |                               |
| ermY       | 54C |       |       |      | NoAmplification               |
| fabK       | 54C | 28.93 | 79.12 | 2.1  | MultipleMeltPeaks             |
| floR       | 54C |       |       |      | NoAmplification               |
| folA       | 54C |       |       |      | NoAmplification               |
| fosB       | 54C |       |       |      | LowEfficiency, CtlIsSmall, S: |
| fosX       | 54C |       |       |      | NoAmplification               |
| fox5       | 54C | 28.89 | 86.57 | 1.97 |                               |
| imiR       | 54C |       |       |      | CurveFitFailed                |
| ImrA-01    | 54C |       |       |      | NoAmplification               |
| intl       | 54C | 31.07 | 84.72 | 1.98 | MultipleMeltPeaks             |
| intl1      | 54C | 20.86 | 87.22 | 1.99 |                               |
| IS613      | 54C | 39.12 | 77.18 | 1.83 | MultipleMeltPeaks             |
| lnuA-01    | 54C |       |       |      | NoAmplification               |
| lnuB-01    | 54C |       |       |      | NoAmplification               |
| lnuB-02    | 54C |       |       |      | NoAmplification               |

|               |     |       |       |      |                   |
|---------------|-----|-------|-------|------|-------------------|
| lnuC          | 54C | 33.84 | 84.12 | 1.83 |                   |
| marR-01       | 54C | 33.1  | 85.34 | 1.91 |                   |
| matA/mel      | 54C | 21.67 | 77.67 | 2.07 |                   |
| mdet1         | 54C |       |       |      | NoAmplification   |
| mdtA          | 54C | 37.84 | 82.39 | 1.78 |                   |
| mdtE/yhiU     | 54C |       |       |      | NoAmplification   |
| mecA          | 54C |       |       |      | NoAmplification   |
| mefA          | 54C | 21.28 | 80.52 | 1.99 |                   |
| mepA          | 54C | 38.18 | 83.16 | 1.83 |                   |
| mexA          | 54C |       |       |      | NoAmplification   |
| mexD          | 54C | 31.66 | 80.21 | 2.04 |                   |
| mexE          | 54C | 32.82 | 81.9  | 1.94 |                   |
| mexF          | 54C | 31.35 | 81.1  | 1.95 |                   |
| mphA-01       | 54C | 31.07 | 88.88 | 1.98 | MultipleMeltPeaks |
| mphA-02       | 54C | 29.67 | 88.66 | 1.37 | MultipleMeltPeaks |
| mphB          | 54C |       |       |      | CurveFitFailed    |
| mphC          | 54C |       |       |      | NoAmplification   |
| msrA-01       | 54C |       |       |      | NoAmplification   |
| msrC-01       | 54C |       |       |      | NoAmplification   |
| mtrC-01       | 54C |       |       |      | NoAmplification   |
| mtrC-02       | 54C |       |       |      | NoAmplification   |
| mtrD-02       | 54C | 29.74 | 81.42 | 1.95 |                   |
| mtrD-03       | 54C |       |       |      | CurveFitFailed    |
| NDM1          | 54C |       |       |      | NoAmplification   |
| nimE          | 54C | 37.08 | 74.93 | 1.96 |                   |
| nisB          | 54C |       |       |      | NoAmplification   |
| oleC          | 54C | 44.68 | 76.31 | 1.71 |                   |
| oprD          | 54C | 29.54 | 81.52 | 1.97 |                   |
| oprJ          | 54C | 38    | 91.44 | 1.79 | MultipleMeltPeaks |
| pbp           | 54C | 38.07 | 84.95 | 1.83 | MultipleMeltPeaks |
| pbp2x         | 54C |       |       |      | NoAmplification   |
| Pbp5          | 54C |       |       |      | NoAmplification   |
| penA          | 54C |       |       |      | NoAmplification   |
| pikR1         | 54C | 36.65 | 82.46 | 1.81 |                   |
| pikR2         | 54C | 34.51 | 85.1  | 1.93 |                   |
| pmrA          | 54C | 38.16 | 79.65 | 1.85 |                   |
| pncA          | 54C | 34.81 | 88.54 | 1.92 | MultipleMeltPeaks |
| putative mult | 54C |       |       |      | NoAmplification   |
| qac           | 54C | 36.71 | 84.92 | 1.82 | MultipleMeltPeaks |
| qacA          | 54C |       |       |      | NoAmplification   |
| qacA/qacB     | 54C |       |       |      | NoAmplification   |
| qacEdelta1-0  | 54C |       |       |      | NoAmplification   |
| qacEdelta1-0  | 54C | 31.18 | 76.32 | 1.98 |                   |
| qacH-01       | 54C | 36.75 | 86.4  | 1.8  |                   |
| qacH-02       | 54C | 39.25 | 83.65 | 1.54 |                   |
| qnrA          | 54C |       |       |      | CurveFitFailed    |



|              |     |       |       |      |                   |
|--------------|-----|-------|-------|------|-------------------|
| rarD-02      | 54C |       |       |      | NoAmplification   |
| sat4         | 54C |       |       |      | NoAmplification   |
| sdeB         | 54C |       |       |      | NoAmplification   |
| spcN-01      | 54C | 39.36 | 62.48 | 1.8  | MultipleMeltPeaks |
| speA         | 54C |       |       |      | NoAmplification   |
| str          | 54C |       |       |      | NoAmplification   |
| strA         | 54C | 37.36 | 85.72 | 1.85 | MultipleMeltPeaks |
| strB         | 54C |       |       |      | NoAmplification   |
| sul1         | 54C |       |       |      | NoAmplification   |
| sul2         | 54C |       |       |      | NoAmplification   |
| sulA/foIP-01 | 54C | 37.21 | 75.47 | 1.87 |                   |
| sulA/foIP-03 | 54C | 31.85 | 74.88 | 1.93 |                   |
| tet(32)      | 54C |       |       |      | NoAmplification   |
| tet(34)      | 54C | 30.59 | 74.82 | 1.8  |                   |
| tet(35)      | 54C |       |       |      | NoAmplification   |
| tet(36)-A    | 54C |       |       |      | NoAmplification   |
| tet(36)-B    | 54C |       |       |      | NoAmplification   |
| tet(37)      | 54C | 32.51 | 80.88 | 1.93 | MultipleMeltPeaks |
| tetA-01      | 54C | 33.2  | 85.04 | 1.92 |                   |
| tetA-02      | 54C | 35.45 | 87.54 | 1.83 | MultipleMeltPeaks |
| tetB-01      | 54C | 31.5  | 86.07 | 1.95 |                   |
| tetB-02      | 54C |       |       |      | NoAmplification   |
| tetC-01      | 54C |       |       |      | NoAmplification   |
| tetC-02      | 54C |       |       |      | NoAmplification   |
| tetD-01      | 54C |       |       |      | NoAmplification   |
| tetD-02      | 54C |       |       |      | CurveFitFailed    |
| tetE         | 54C |       |       |      | NoAmplification   |
| tetG-01      | 54C | 30.76 | 80.87 | 2.02 |                   |
| tetG-02      | 54C |       |       |      | CurveFitFailed    |
| tetH         | 54C |       |       |      | NoAmplification   |
| tetJ         | 54C |       |       |      | NoAmplification   |
| tetK         | 54C |       |       |      | NoAmplification   |
| tetL-01      | 54C |       |       |      | NoAmplification   |
| tetL-02      | 54C | 38.82 | 85.35 | 1.62 |                   |
| tetM-01      | 54C | 39.44 | 62.57 | 2    | MultipleMeltPeaks |
| tetM-02      | 54C |       |       |      | NoAmplification   |
| tetO-01      | 54C |       |       |      | NoAmplification   |
| tetPA        | 54C | 35.51 | 71.06 | 1.96 |                   |
| tetPB-01     | 54C |       |       |      | NoAmplification   |
| tetPB-02     | 54C | 30.1  | 84.8  | 1.99 |                   |
| tetPB-03     | 54C |       |       |      | NoAmplification   |
| tetPB-05     | 54C |       |       |      | NoAmplification   |
| tetQ         | 54C |       |       |      | NoAmplification   |
| tetR-02      | 54C | 30.18 | 90.09 | 1.91 | MultipleMeltPeaks |
| tetR-03      | 54C |       |       |      | NoAmplification   |
| tetS         | 54C |       |       |      | NoAmplification   |

|             |     |       |       |      |                   |
|-------------|-----|-------|-------|------|-------------------|
| tetT        | 54C |       |       |      | NoAmplification   |
| tetU-01     | 54C |       |       |      | NoAmplification   |
| tetV        | 54C |       |       |      | NoAmplification   |
| tetW-01     | 54C |       |       |      | NoAmplification   |
| tetX        | 54C |       |       |      | NoAmplification   |
| tnpA-01     | 54C |       |       |      | NoAmplification   |
| tnpA-02     | 54C | 38.71 | 89    | 1.63 | MultipleMeltPeaks |
| tnpA-03     | 54C | 23.27 | 77.23 | 1.86 |                   |
| tnpA-04     | 54C | 36.21 | 88.04 | 1.79 |                   |
| tnpA-05     | 54C | 28.94 | 80.72 | 1.93 |                   |
| tnpA-07     | 54C |       |       |      | NoAmplification   |
| tolC-01     | 54C |       |       |      | NoAmplification   |
| tolC-02     | 54C | 30.59 | 87.25 | 1.95 |                   |
| tolC-03     | 54C | 30.81 | 84.93 | 1.96 |                   |
| Tp614       | 54C | 33.54 | 74.58 | 2    |                   |
| ttgA        | 54C |       |       |      | NoAmplification   |
| ttgB        | 54C |       |       |      | CurveFitFailed    |
| vanA        | 54C |       |       |      | NoAmplification   |
| vanB-01     | 54C | 36.96 | 82.55 | 1.72 |                   |
| vanC-01     | 54C |       |       |      | NoAmplification   |
| vanC-02     | 54C |       |       |      | NoAmplification   |
| vanC-03     | 54C | 27.31 | 86.43 | 1.95 |                   |
| vanC1       | 54C |       |       |      | NoAmplification   |
| vanC2/vanC3 | 54C | 32.93 | 84.57 | 2.04 | MultipleMeltPeaks |
| vanG        | 54C |       |       |      | NoAmplification   |
| vanHB       | 54C | 30.21 | 80.28 | 1.96 |                   |
| vanHD       | 54C |       |       |      | CurveFitFailed    |
| vanRA-01    | 54C |       |       |      | NoAmplification   |
| vanRA-02    | 54C |       |       |      | NoAmplification   |
| vanRB       | 54C | 31.95 | 85.54 | 1.97 |                   |
| vanRC       | 54C |       |       |      | NoAmplification   |
| vanRC4      | 54C |       |       |      | NoAmplification   |
| vanRD       | 54C |       |       |      | NoAmplification   |
| vanSA       | 54C |       |       |      | NoAmplification   |
| vanSB       | 54C | 29.09 | 74.59 | 2.1  |                   |
| vanSC-01    | 54C | 35.58 | 77.53 | 1.93 |                   |
| vanSC-02    | 54C |       |       |      | NoAmplification   |
| vanTC-01    | 54C |       |       |      | NoAmplification   |
| vanTC-02    | 54C | 38.25 | 84.56 | 1.82 | MultipleMeltPeaks |
| vanTE       | 54C | 35.48 | 77.71 | 1.82 | MultipleMeltPeaks |
| vanTG       | 54C |       |       |      | NoAmplification   |
| vanWB       | 54C |       |       |      | NoAmplification   |
| vanWG       | 54C | 39.81 | 81.51 | 1.77 | MultipleMeltPeaks |
| vanXA       | 54C |       |       |      | NoAmplification   |
| vanXB       | 54C |       |       |      | NoAmplification   |
| vanXD       | 54C | 30.57 | 75.5  | 2.06 |                   |

|              |     |       |       |      |                   |
|--------------|-----|-------|-------|------|-------------------|
| vanYB        | 54C | 36.94 | 85.14 | 1.85 |                   |
| vanYD-01     | 54C | 31.48 | 81.8  | 1.82 |                   |
| vanYD-02     | 54C |       |       |      | NoAmplification   |
| vatB-01      | 54C |       |       |      | NoAmplification   |
| vatB-02      | 54C |       |       |      | NoAmplification   |
| vatC-01      | 54C | 37.55 | 71.91 | 1.78 | MultipleMeltPeaks |
| vatC-02      | 54C | 34.06 | 83.27 | 1.91 |                   |
| vatE-01      | 54C | 28.87 | 76.2  | 2.13 |                   |
| vatE-02      | 54C | 34.84 | 76.03 | 2.05 |                   |
| vgaA-01      | 54C |       |       |      | NoAmplification   |
| vgaA-02      | 54C |       |       |      | CurveFitFailed    |
| vgb-01       | 54C | 38.16 | 74.58 | 1.81 | MultipleMeltPeaks |
| vgbB-01      | 54C |       |       |      | NoAmplification   |
| vgbB-02      | 54C |       |       |      | NoAmplification   |
| yceE/mdtG-0  | 54C |       |       |      | NoAmplification   |
| yceE/mdtG-0  | 54C |       |       |      | NoAmplification   |
| yceL/mdtH-0  | 54C | 32.29 | 82.24 | 1.86 |                   |
| yceL/mdtH-0  | 54C |       |       |      | NoAmplification   |
| yceL/mdtH-0  | 54C | 37.36 | 75.98 | 2.3  | MultipleMeltPeaks |
| yidY/mdtL-01 | 54C | 38.29 | 82.48 | 1.78 |                   |
| yidY/mdtL-02 | 54C | 33.13 | 75.73 | 1.99 |                   |































| Assay          | Sample | Ct | Tm    | Efficiency | flag                   |
|----------------|--------|----|-------|------------|------------------------|
| 16S rRNA       | 55A    |    | 16.75 | 81.63      | 2.07                   |
| aac            | 55A    |    | 30    | 86.26      | 1.58 MultipleMeltPeaks |
| aac(6')-Ib(akz | 55A    |    |       |            | NoAmplification        |
| aac(6')-Ib(akz | 55A    |    | 32.44 | 87.01      | 1.95 MultipleMeltPeaks |
| aac(6')-Ib(akz | 55A    |    | 30.48 | 87.12      | 1.97 MultipleMeltPeaks |
| aac(6')-II     | 55A    |    | 36.85 | 80.85      | 1.63 MultipleMeltPeaks |
| aac(6')I1      | 55A    |    |       |            | NoAmplification        |
| aacA/aphD      | 55A    |    |       |            | NoAmplification        |
| aacC           | 55A    |    | 32.03 | 90.7       | 1.93 MultipleMeltPeaks |
| aacC1          | 55A    |    |       |            | NoAmplification        |
| aacC2          | 55A    |    |       |            | NoAmplification        |
| aacC4          | 55A    |    | 34.75 | 78.37      | 1.85 MultipleMeltPeaks |
| aadA-01        | 55A    |    | 36.86 | 79.35      | 1.9                    |
| aadA-02        | 55A    |    | 29.3  | 82.05      | 1.96                   |
| aadA-1-01      | 55A    |    | 36.6  | 85.55      | 1.86                   |
| aadA-1-02      | 55A    |    |       |            | NoAmplification        |
| aadA1          | 55A    |    | 36.12 | 80.6       | 1.87                   |
| aadA2-01       | 55A    |    | 36.36 | 84.8       | 1.75 MultipleMeltPeaks |
| aadA2-02       | 55A    |    | 31.02 | 75.46      | 1.99                   |
| aadA2-03       | 55A    |    |       |            | NoAmplification        |
| aadA5-01       | 55A    |    | 33.84 | 84.97      | 1.92                   |
| aadA5-02       | 55A    |    | 35.96 | 83.89      | 1.81 MultipleMeltPeaks |
| aadA9-01       | 55A    |    | 37.29 | 89.54      | 1.79 MultipleMeltPeaks |
| aadA9-02       | 55A    |    |       |            | NoAmplification        |
| aadD           | 55A    |    |       |            | NoAmplification        |
| aadE           | 55A    |    |       |            | NoAmplification        |
| acrA-01        | 55A    |    | 31.25 | 88.75      | 1.93                   |
| acrA-02        | 55A    |    | 35.16 | 82.21      | 1.82 MultipleMeltPeaks |
| acrA-03        | 55A    |    |       |            | NoAmplification        |
| acrA-04        | 55A    |    | 31.09 | 80.49      | 1.96                   |
| acrA-05        | 55A    |    | 29.91 | 81.63      | 1.98                   |
| acrB-01        | 55A    |    | 36.86 | 74.99      | 1.98                   |
| acrF           | 55A    |    | 30.25 | 82.48      | 1.86                   |
| acrR-01        | 55A    |    |       |            | CurveFitFailed         |
| acrR-02        | 55A    |    | 35.91 | 79.44      | 1.85                   |
| Actin          | 55A    |    | 19.95 | 87.12      | 2.01                   |
| adeA           | 55A    |    |       |            | NoAmplification        |
| ampC-01        | 55A    |    | 34.32 | 84.33      | 1.86 MultipleMeltPeaks |
| ampC-02        | 55A    |    | 29.3  | 81.88      | 1.88                   |
| ampC-04        | 55A    |    | 32.48 | 78.49      | 1.9                    |
| ampC-05        | 55A    |    |       |            | NoAmplification        |
| ampC-06        | 55A    |    |       |            | CurveFitFailed         |
| ampC-07        | 55A    |    | 36.52 | 88.02      | 1.81                   |
| ampC-09        | 55A    |    | 33.42 | 76.17      | 1.92                   |
| ampC/blaDH     | 55A    |    | 29.09 | 85.47      | 1.97                   |

|                          |     |       |       |      |                   |
|--------------------------|-----|-------|-------|------|-------------------|
| aph                      | 55A |       |       |      | NoAmplification   |
| aph(2')-Id-01            | 55A |       |       |      | NoAmplification   |
| aph(2')-Id-02            | 55A |       |       |      | NoAmplification   |
| aph6ia                   | 55A |       |       |      | NoAmplification   |
| aphA1(aka k <sub>z</sub> | 55A | 29.5  | 76.35 | 2.06 |                   |
| bacA-01                  | 55A |       |       |      | NoAmplification   |
| bacA-02                  | 55A | 36.42 | 84.26 | 1.65 | MultipleMeltPeaks |
| BETA-globin              | 55A | 21.72 | 84.03 | 1.99 |                   |
| bla-ACC-1                | 55A | 34.4  | 86.55 | 1.83 |                   |
| bla-L1                   | 55A | 30.2  | 84.94 | 1.96 |                   |
| bla1                     | 55A |       |       |      | NoAmplification   |
| blaCMY                   | 55A |       |       |      | NoAmplification   |
| blaCMY2-01               | 55A | 38.43 | 75.26 | 1.92 | MultipleMeltPeaks |
| blaCMY2-02               | 55A | 28.75 | 83.66 | 2.02 |                   |
| blaCTX-M-01              | 55A | 33.78 | 86.47 | 2.01 |                   |
| blaCTX-M-02              | 55A | 34.82 | 79.83 | 1.8  | MultipleMeltPeaks |
| blaCTX-M-03              | 55A |       |       |      | NoAmplification   |
| blaCTX-M-04              | 55A | 38.95 | 85.08 | 1.74 |                   |
| blaCTX-M-05              | 55A | 32.38 | 76.62 | 1.75 |                   |
| blaCTX-M-06              | 55A |       |       |      | NoAmplification   |
| blaGES                   | 55A |       |       |      | NoAmplification   |
| blaIMP-01                | 55A |       |       |      | NoAmplification   |
| blaIMP-02                | 55A | 38.54 | 78.53 | 1.91 |                   |
| blaMOX/blaC              | 55A |       |       |      | NoAmplification   |
| blaOCH                   | 55A |       |       |      | NoAmplification   |
| blaOKP                   | 55A |       |       |      | NoAmplification   |
| blaOXA1/blaC             | 55A |       |       |      | NoAmplification   |
| blaOXA10-01              | 55A |       |       |      | NoAmplification   |
| blaOXA10-02              | 55A |       |       |      | NoAmplification   |
| blaOXY                   | 55A |       |       |      | NoAmplification   |
| blaPAO                   | 55A |       |       |      | NoAmplification   |
| blaPER                   | 55A | 32.54 | 81.84 | 2.03 |                   |
| blaPSE                   | 55A |       |       |      | NoAmplification   |
| blaROB                   | 55A | 38.78 | 76.08 | 1.79 |                   |
| blaSFO                   | 55A | 31.85 | 82.76 | 1.92 |                   |
| blaSHV-01                | 55A |       |       |      | CurveFitFailed    |
| blaSHV-02                | 55A |       |       |      | NoAmplification   |
| blaTEM                   | 55A | 29.38 | 79.42 | 1.95 |                   |
| blaTLA                   | 55A |       |       |      | NoAmplification   |
| blaVEB                   | 55A |       |       |      | NoAmplification   |
| blaVIM                   | 55A |       |       |      | NoAmplification   |
| blaZ                     | 55A |       |       |      | NoAmplification   |
| carB                     | 55A |       |       |      | NoAmplification   |
| catA1                    | 55A |       |       |      | NoAmplification   |
| catB3                    | 55A | 32.29 | 87.55 | 2.02 |                   |
| catB8                    | 55A | 29.47 | 83.1  | 2.02 |                   |

|            |     |       |       |      |                              |
|------------|-----|-------|-------|------|------------------------------|
| ceoA       | 55A | 27.19 | 82.29 | 1.98 | MultipleMeltPeaks            |
| cepA       | 55A |       |       |      | NoAmplification              |
| cfiA       | 55A | 33.3  | 88.63 | 1.97 |                              |
| cfr        | 55A |       |       |      | NoAmplification              |
| cfxA       | 55A |       |       |      | NoAmplification              |
| cmeA       | 55A | 36.87 | 78.27 | 1.92 |                              |
| cmlA1-01   | 55A |       |       |      | NoAmplification              |
| cmlA1-02   | 55A |       |       |      | NoAmplification              |
| cmr        | 55A |       |       |      | NoAmplification              |
| cmx(A)     | 55A | 28.5  | 84.44 | 1.94 | MultipleMeltPeaks            |
| cphA-01    | 55A | 33.12 | 85.51 | 1.93 |                              |
| cphA-02    | 55A | 30.77 | 82.53 | 1.93 |                              |
| dfrA1      | 55A | 32.95 | 78.51 | 2.02 |                              |
| dfrA12     | 55A | 42.93 | 61.54 | 1.66 | MultipleMeltPeaks            |
| emrD       | 55A |       |       |      | CurveFitFailed               |
| ereA       | 55A | 35.82 | 82.38 | 1.9  |                              |
| ereB       | 55A |       |       |      | CurveFitFailed               |
| erm(34)    | 55A |       |       |      | NoAmplification              |
| erm(35)    | 55A |       |       |      | NoAmplification              |
| erm(36)    | 55A |       |       |      | CurveFitFailed               |
| ermA       | 55A |       |       |      | NoAmplification              |
| ermA/ermTR | 55A | 28.86 | 75.71 | 2.01 |                              |
| ermB       | 55A |       |       |      | NoAmplification              |
| ermC       | 55A |       |       |      | CtIsSmall, CurveFitFailed, F |
| ermF       | 55A |       |       |      | NoAmplification              |
| ermJ/ermD  | 55A |       |       |      | NoAmplification              |
| ermK-01    | 55A | 36.01 | 80.36 | 1.92 |                              |
| ermK-02    | 55A | 35.71 | 85.23 | 1.82 |                              |
| ermT-01    | 55A |       |       |      | NoAmplification              |
| ermT-02    | 55A |       |       |      | NoAmplification              |
| ermX       | 55A | 35.61 | 87.32 | 1.67 |                              |
| ermY       | 55A |       |       |      | NoAmplification              |
| fabK       | 55A | 25.94 | 77.65 | 2.11 |                              |
| floR       | 55A | 37.7  | 83.62 | 1.84 | MultipleMeltPeaks            |
| folA       | 55A |       |       |      | NoAmplification              |
| fosB       | 55A |       |       |      | LowEfficiency, CtIsSmall, S: |
| fosX       | 55A |       |       |      | NoAmplification              |
| fox5       | 55A | 29.21 | 86.26 | 1.99 |                              |
| imiR       | 55A |       |       |      | NoAmplification              |
| ImrA-01    | 55A |       |       |      | NoAmplification              |
| intl       | 55A | 30.16 | 84.79 | 1.9  |                              |
| intl1      | 55A | 20.57 | 87.13 | 1.98 |                              |
| IS613      | 55A |       |       |      | NoAmplification              |
| lnuA-01    | 55A |       |       |      | NoAmplification              |
| lnuB-01    | 55A |       |       |      | NoAmplification              |
| lnuB-02    | 55A |       |       |      | NoAmplification              |

|               |     |       |       |      |                   |
|---------------|-----|-------|-------|------|-------------------|
| lnuC          | 55A | 38.2  | 84.34 | 1.66 | MultipleMeltPeaks |
| marR-01       | 55A | 33.05 | 85.43 | 1.96 |                   |
| matA/mel      | 55A | 20.07 | 77.59 | 2.07 |                   |
| mdet1         | 55A |       |       |      | NoAmplification   |
| mdtA          | 55A | 40.97 | 82.22 | 1.57 | MultipleMeltPeaks |
| mdtE/yhiU     | 55A |       |       |      | NoAmplification   |
| mecA          | 55A |       |       |      | NoAmplification   |
| mefA          | 55A | 19    | 80.46 | 2.02 |                   |
| mepA          | 55A | 36.68 | 85.52 | 1.79 |                   |
| mexA          | 55A |       |       |      | NoAmplification   |
| mexD          | 55A | 35.1  | 86.05 | 1.86 |                   |
| mexE          | 55A | 34.84 | 88.22 | 1.91 |                   |
| mexF          | 55A | 32.97 | 80.84 | 1.98 | MultipleMeltPeaks |
| mphA-01       | 55A | 31.17 | 86.84 | 2    |                   |
| mphA-02       | 55A | 30.98 | 85.74 | 1.99 | MultipleMeltPeaks |
| mphB          | 55A |       |       |      | NoAmplification   |
| mphC          | 55A |       |       |      | NoAmplification   |
| msrA-01       | 55A |       |       |      | NoAmplification   |
| msrC-01       | 55A |       |       |      | NoAmplification   |
| mtrC-01       | 55A |       |       |      | NoAmplification   |
| mtrC-02       | 55A | 34.06 | 84.88 | 2.01 | MultipleMeltPeaks |
| mtrD-02       | 55A | 29.35 | 82.12 | 1.86 |                   |
| mtrD-03       | 55A | 34.09 | 82.46 | 1.89 |                   |
| NDM1          | 55A |       |       |      | CurveFitFailed    |
| nimE          | 55A | 35.62 | 85.04 | 1.97 |                   |
| nisB          | 55A |       |       |      | NoAmplification   |
| oleC          | 55A | 35.83 | 83.98 | 1.81 |                   |
| oprD          | 55A | 29.01 | 83.89 | 2    | MultipleMeltPeaks |
| oprJ          | 55A | 37.03 | 88.43 | 1.86 |                   |
| pbp           | 55A |       |       |      | NoAmplification   |
| pbp2x         | 55A | 25.94 | 75.71 | 1.99 |                   |
| Pbp5          | 55A |       |       |      | NoAmplification   |
| penA          | 55A |       |       |      | NoAmplification   |
| pikR1         | 55A | 38.27 | 61.98 | 1.94 | MultipleMeltPeaks |
| pikR2         | 55A | 33.25 | 84.72 | 1.97 |                   |
| pmrA          | 55A | 22.21 | 79.09 | 2.09 |                   |
| pncA          | 55A | 33.62 | 80.29 | 1.84 | MultipleMeltPeaks |
| putative mult | 55A | 35.62 | 76.86 | 1.89 | MultipleMeltPeaks |
| qac           | 55A |       |       |      | NoAmplification   |
| qacA          | 55A |       |       |      | NoAmplification   |
| qacA/qacB     | 55A |       |       |      | NoAmplification   |
| qacEdelta1-0  | 55A |       |       |      | NoAmplification   |
| qacEdelta1-0  | 55A | 27.57 | 78.4  | 1.98 |                   |
| qacH-01       | 55A | 35.28 | 85.68 | 1.87 |                   |
| qacH-02       | 55A | 33.51 | 79.33 | 1.84 | MultipleMeltPeaks |
| qnrA          | 55A | 38.1  | 72.73 | 1.95 |                   |

|              |     |       |       |      |                              |
|--------------|-----|-------|-------|------|------------------------------|
| rarD-02      | 55A |       |       |      | NoAmplification              |
| sat4         | 55A |       |       |      | NoAmplification              |
| sdeB         | 55A |       |       |      | NoAmplification              |
| spcN-01      | 55A |       |       |      | NoAmplification              |
| speA         | 55A |       |       |      | NoAmplification              |
| str          | 55A |       |       |      | NoAmplification              |
| strA         | 55A |       |       |      | NoAmplification              |
| strB         | 55A |       |       |      | NoAmplification              |
| sul1         | 55A | 35.04 | 89.83 | 1.76 |                              |
| sul2         | 55A |       |       |      | NoAmplification              |
| sulA/foIP-01 | 55A | 24.26 | 81.06 | 1.96 |                              |
| sulA/foIP-03 | 55A | 20.91 | 83.89 | 2.02 |                              |
| tet(32)      | 55A |       |       |      | NoAmplification              |
| tet(34)      | 55A | 33.72 | 75.15 | 1.99 |                              |
| tet(35)      | 55A |       |       |      | NoAmplification              |
| tet(36)-A    | 55A |       |       |      | NoAmplification              |
| tet(36)-B    | 55A |       |       |      | NoAmplification              |
| tet(37)      | 55A | 33.13 | 86.76 | 1.89 | MultipleMeltPeaks            |
| tetA-01      | 55A | 28.38 | 85.13 | 1.92 |                              |
| tetA-02      | 55A | 35.05 | 80.58 | 1.93 |                              |
| tetB-01      | 55A | 35.87 | 86.54 | 1.85 | MultipleMeltPeaks            |
| tetB-02      | 55A |       |       |      | NoAmplification              |
| tetC-01      | 55A |       |       |      | NoAmplification              |
| tetC-02      | 55A |       |       |      | CurveFitFailed               |
| tetD-01      | 55A |       |       |      | NoAmplification              |
| tetD-02      | 55A |       |       |      | NoAmplification              |
| tetE         | 55A | 40.2  | 84.27 | 1.81 | MultipleMeltPeaks            |
| tetG-01      | 55A |       |       |      | CtIsSmall, CurveFitFailed, F |
| tetG-02      | 55A |       |       |      | LowEfficiency, CtIsSmall, Ci |
| tetH         | 55A |       |       |      | NoAmplification              |
| tetJ         | 55A |       |       |      | NoAmplification              |
| tetK         | 55A |       |       |      | NoAmplification              |
| tetL-01      | 55A |       |       |      | NoAmplification              |
| tetL-02      | 55A | 34.55 | 85.19 | 1.7  |                              |
| tetM-01      | 55A | 22.98 | 76.06 | 2.03 |                              |
| tetM-02      | 55A | 22.98 | 77.72 | 2.04 |                              |
| tetO-01      | 55A |       |       |      | NoAmplification              |
| tetPA        | 55A |       |       |      | NoAmplification              |
| tetPB-01     | 55A | 45    | 63.18 | 1.88 | MultipleMeltPeaks            |
| tetPB-02     | 55A | 30.44 | 84.8  | 1.98 |                              |
| tetPB-03     | 55A |       |       |      | NoAmplification              |
| tetPB-05     | 55A |       |       |      | NoAmplification              |
| tetQ         | 55A |       |       |      | NoAmplification              |
| tetR-02      | 55A | 34.87 | 86.71 | 1.88 |                              |
| tetR-03      | 55A |       |       |      | NoAmplification              |
| tetS         | 55A | 37.81 | 82.65 | 1.91 | MultipleMeltPeaks            |

|             |     |       |       |      |                              |
|-------------|-----|-------|-------|------|------------------------------|
| tetT        | 55A |       |       |      | NoAmplification              |
| tetU-01     | 55A |       |       |      | NoAmplification              |
| tetV        | 55A |       |       |      | NoAmplification              |
| tetW-01     | 55A |       |       |      | NoAmplification              |
| tetX        | 55A |       |       |      | BadR2, CtIsSmall, Saturatio  |
| tnpA-01     | 55A | 39.23 | 79.54 | 1.89 |                              |
| tnpA-02     | 55A | 33.21 | 79.43 | 1.79 |                              |
| tnpA-03     | 55A | 31.32 | 75.41 | 2.12 |                              |
| tnpA-04     | 55A | 28.85 | 82.32 | 1.92 |                              |
| tnpA-05     | 55A | 37.37 | 62.99 | 1.94 | MultipleMeltPeaks            |
| tnpA-07     | 55A |       |       |      | NoAmplification              |
| tolC-01     | 55A |       |       |      | NoAmplification              |
| tolC-02     | 55A | 29.73 | 84.22 | 1.95 |                              |
| tolC-03     | 55A | 31.97 | 87.8  | 1.91 |                              |
| Tp614       | 55A | 41.13 | 73.7  | 1.66 | MultipleMeltPeaks            |
| ttgA        | 55A | 38.71 | 83.89 | 1.76 |                              |
| ttgB        | 55A | 34.63 | 85.02 | 1.96 |                              |
| vanA        | 55A |       |       |      | NoAmplification              |
| vanB-01     | 55A | 33.62 | 84.37 | 2.01 |                              |
| vanC-01     | 55A |       |       |      | NoAmplification              |
| vanC-02     | 55A |       |       |      | NoAmplification              |
| vanC-03     | 55A | 25.54 | 86.69 | 1.94 |                              |
| vanC1       | 55A |       |       |      | NoAmplification              |
| vanC2/vanC3 | 55A | 34.15 | 82.69 | 2.02 | MultipleMeltPeaks            |
| vanG        | 55A |       |       |      | NoAmplification              |
| vanHB       | 55A |       |       |      | NoAmplification              |
| vanHD       | 55A | 39.94 | 75.06 | 1.72 | MultipleMeltPeaks            |
| vanRA-01    | 55A |       |       |      | NoAmplification              |
| vanRA-02    | 55A |       |       |      | NoAmplification              |
| vanRB       | 55A | 34.77 | 87.45 | 1.97 |                              |
| vanRC       | 55A |       |       |      | NoAmplification              |
| vanRC4      | 55A |       |       |      | NoAmplification              |
| vanRD       | 55A |       |       |      | BadR2, CtIsSmall, Saturatio  |
| vanSA       | 55A |       |       |      | NoAmplification              |
| vanSB       | 55A | 30.48 | 74.6  | 2.07 |                              |
| vanSC-01    | 55A | 33.39 | 84.05 | 2.05 |                              |
| vanSC-02    | 55A |       |       |      | NoAmplification              |
| vanTC-01    | 55A |       |       |      | NoAmplification              |
| vanTC-02    | 55A |       |       |      | NoAmplification              |
| vanTE       | 55A | 37.08 | 77.9  | 1.78 | MultipleMeltPeaks            |
| vanTG       | 55A | 33.88 | 74.41 | 2.01 |                              |
| vanWB       | 55A |       |       |      | LowEfficiency, CtIsSmall, S: |
| vanWG       | 55A | 32.84 | 74.44 | 2.02 |                              |
| vanXA       | 55A |       |       |      | NoAmplification              |
| vanXB       | 55A |       |       |      | NoAmplification              |
| vanXD       | 55A | 29.93 | 75.11 | 2.09 |                              |

|              |     |       |       |      |                   |
|--------------|-----|-------|-------|------|-------------------|
| vanYB        | 55A | 36.68 | 86.21 | 1.84 |                   |
| vanYD-01     | 55A | 31.85 | 82.54 | 1.82 | MultipleMeltPeaks |
| vanYD-02     | 55A | 38.13 | 80.64 | 2.01 | MultipleMeltPeaks |
| vatB-01      | 55A |       |       |      | NoAmplification   |
| vatB-02      | 55A |       |       |      | NoAmplification   |
| vatC-01      | 55A | 36.49 | 81.31 | 1.85 |                   |
| vatC-02      | 55A | 37.63 | 86.36 | 1.87 | MultipleMeltPeaks |
| vatE-01      | 55A | 31.36 | 76.29 | 2.12 |                   |
| vatE-02      | 55A |       |       |      | NoAmplification   |
| vgaA-01      | 55A |       |       |      | NoAmplification   |
| vgaA-02      | 55A |       |       |      | NoAmplification   |
| vgb-01       | 55A | 34.77 | 75.8  | 1.97 |                   |
| vgbB-01      | 55A |       |       |      | NoAmplification   |
| vgbB-02      | 55A |       |       |      | NoAmplification   |
| yceE/mdtG-0  | 55A |       |       |      | NoAmplification   |
| yceE/mdtG-0  | 55A |       |       |      | NoAmplification   |
| yceL/mdtH-0  | 55A | 33.53 | 84.32 | 1.95 | MultipleMeltPeaks |
| yceL/mdtH-0  | 55A |       |       |      | NoAmplification   |
| yceL/mdtH-0  | 55A | 37.83 | 81.37 | 1.85 |                   |
| yidY/mdtL-01 | 55A | 35.71 | 88.43 | 1.83 | MultipleMeltPeaks |
| yidY/mdtL-02 | 55A |       |       |      | NoAmplification   |































| Assay          | Sample | Ct | Tm    | Efficiency | flag                   |
|----------------|--------|----|-------|------------|------------------------|
| 16S rRNA       | 55B    |    | 15.41 | 82.41      | 1.98                   |
| aac            | 55B    |    | 29.52 | 81.9       | 1.76 MultipleMeltPeaks |
| aac(6')-Ib(akz | 55B    |    | 37.5  | 80.99      | 1.81                   |
| aac(6')-Ib(akz | 55B    |    | 31.17 | 82.37      | 1.97 MultipleMeltPeaks |
| aac(6')-Ib(akz | 55B    |    | 30.98 | 80.99      | 1.96 MultipleMeltPeaks |
| aac(6')-II     | 55B    |    | 34.18 | 84.02      | 1.72 MultipleMeltPeaks |
| aac(6')I1      | 55B    |    | 35.23 | 88.51      | 1.79                   |
| aacA/aphD      | 55B    |    |       |            | NoAmplification        |
| aacC           | 55B    |    | 31.54 | 86.41      | 1.91 MultipleMeltPeaks |
| aacC1          | 55B    |    | 28.91 | 81.81      | 1.93                   |
| aacC2          | 55B    |    |       |            | NoAmplification        |
| aacC4          | 55B    |    | 34.3  | 89.35      | 1.94 MultipleMeltPeaks |
| aadA-01        | 55B    |    | 26.22 | 81.97      | 1.97                   |
| aadA-02        | 55B    |    | 28.19 | 82.11      | 1.98                   |
| aadA-1-01      | 55B    |    | 37.41 | 81.54      | 1.84 MultipleMeltPeaks |
| aadA-1-02      | 55B    |    |       |            | NoAmplification        |
| aadA1          | 55B    |    | 27.64 | 84.67      | 2 MultipleMeltPeaks    |
| aadA2-01       | 55B    |    | 39.34 | 79.93      | 1.69                   |
| aadA2-02       | 55B    |    | 30.58 | 81.53      | 1.95                   |
| aadA2-03       | 55B    |    |       |            | NoAmplification        |
| aadA5-01       | 55B    |    | 32.71 | 83.39      | 1.87 MultipleMeltPeaks |
| aadA5-02       | 55B    |    | 33.89 | 86.4       | 1.93 MultipleMeltPeaks |
| aadA9-01       | 55B    |    | 36.93 | 87.8       | 1.83 MultipleMeltPeaks |
| aadA9-02       | 55B    |    |       |            | NoAmplification        |
| aadD           | 55B    |    |       |            | NoAmplification        |
| aadE           | 55B    |    |       |            | NoAmplification        |
| acrA-01        | 55B    |    | 31.24 | 88.73      | 1.96                   |
| acrA-02        | 55B    |    |       |            | CurveFitFailed         |
| acrA-03        | 55B    |    | 33.21 | 85.47      | 1.88                   |
| acrA-04        | 55B    |    | 34.64 | 80.33      | 1.94                   |
| acrA-05        | 55B    |    | 30.35 | 85.04      | 1.96 MultipleMeltPeaks |
| acrB-01        | 55B    |    | 29.04 | 82.25      | 1.98                   |
| acrF           | 55B    |    | 27.68 | 82.61      | 1.89                   |
| acrR-01        | 55B    |    |       |            | CurveFitFailed         |
| acrR-02        | 55B    |    | 28.6  | 80.6       | 1.96                   |
| Actin          | 55B    |    | 20.05 | 87.11      | 2.01                   |
| adeA           | 55B    |    |       |            | NoAmplification        |
| ampC-01        | 55B    |    | 34.65 | 85.81      | 1.84                   |
| ampC-02        | 55B    |    | 28.18 | 81.96      | 1.9                    |
| ampC-04        | 55B    |    | 34.28 | 77.97      | 1.99                   |
| ampC-05        | 55B    |    |       |            | NoAmplification        |
| ampC-06        | 55B    |    |       |            | NoAmplification        |
| ampC-07        | 55B    |    | 33.58 | 88.25      | 1.87                   |
| ampC-09        | 55B    |    |       |            | NoAmplification        |
| ampC/blaDH     | 55B    |    | 29.25 | 84.56      | 1.97 MultipleMeltPeaks |

|                            |     |       |       |      |                          |
|----------------------------|-----|-------|-------|------|--------------------------|
| aph                        | 55B |       |       |      | NoAmplification          |
| aph(2')-Id-01              | 55B |       |       |      | NoAmplification          |
| aph(2')-Id-02              | 55B |       |       |      | NoAmplification          |
| aph6ia                     | 55B |       |       |      | NoAmplification          |
| aphA1(aka k <sub>a</sub> ) | 55B | 29.23 | 76.42 | 2.08 |                          |
| bacA-01                    | 55B | 42.49 | 73.61 | 1.73 |                          |
| bacA-02                    | 55B | 28.53 | 82.78 | 1.95 |                          |
| BETA-globin                | 55B | 22.35 | 84.07 | 2    |                          |
| bla-ACC-1                  | 55B | 37.55 | 87.56 | 1.74 | MultipleMeltPeaks        |
| bla-L1                     | 55B | 30.44 | 85.38 | 1.9  |                          |
| bla1                       | 55B |       |       |      | NoAmplification          |
| blaCMY                     | 55B | 39.97 | 77.19 | 1.82 | BadR2, MultipleMeltPeaks |
| blaCMY2-01                 | 55B | 36.87 | 77.23 | 1.85 | MultipleMeltPeaks        |
| blaCMY2-02                 | 55B | 28.27 | 87.4  | 2.04 | MultipleMeltPeaks        |
| blaCTX-M-01                | 55B |       |       |      | NoAmplification          |
| blaCTX-M-02                | 55B | 31.87 | 79.98 | 1.87 |                          |
| blaCTX-M-03                | 55B |       |       |      | NoAmplification          |
| blaCTX-M-04                | 55B | 35.82 | 88.03 | 1.81 | MultipleMeltPeaks        |
| blaCTX-M-05                | 55B | 32.44 | 75.97 | 1.78 |                          |
| blaCTX-M-06                | 55B | 35.35 | 88.28 | 1.82 |                          |
| blaGES                     | 55B |       |       |      | NoAmplification          |
| blaIMP-01                  | 55B |       |       |      | NoAmplification          |
| blaIMP-02                  | 55B |       |       |      | NoAmplification          |
| blaMOX/blaC                | 55B |       |       |      | NoAmplification          |
| blaOCH                     | 55B |       |       |      | NoAmplification          |
| blaOKP                     | 55B |       |       |      | NoAmplification          |
| blaOXA1/blaC               | 55B |       |       |      | NoAmplification          |
| blaOXA10-01                | 55B |       |       |      | NoAmplification          |
| blaOXA10-02                | 55B |       |       |      | NoAmplification          |
| blaOXY                     | 55B | 36.18 | 89.92 | 1.68 |                          |
| blaPAO                     | 55B |       |       |      | NoAmplification          |
| blaPER                     | 55B |       |       |      | CurveFitFailed           |
| blaPSE                     | 55B | 37.42 | 85.97 | 1.68 |                          |
| blaROB                     | 55B |       |       |      | NoAmplification          |
| blaSFO                     | 55B | 30.49 | 80.39 | 1.91 | MultipleMeltPeaks        |
| blaSHV-01                  | 55B | 32.65 | 81.28 | 2.01 |                          |
| blaSHV-02                  | 55B | 27.59 | 85.73 | 1.93 |                          |
| blaTEM                     | 55B | 27.31 | 79.44 | 1.92 |                          |
| blaTLA                     | 55B |       |       |      | NoAmplification          |
| blaVEB                     | 55B |       |       |      | NoAmplification          |
| blaVIM                     | 55B |       |       |      | NoAmplification          |
| blaZ                       | 55B | 27.93 | 74.86 | 2.03 |                          |
| carB                       | 55B |       |       |      | CurveFitFailed           |
| catA1                      | 55B |       |       |      | NoAmplification          |
| catB3                      | 55B |       |       |      | CurveFitFailed           |
| catB8                      | 55B | 28.93 | 82.3  | 1.98 | MultipleMeltPeaks        |

|            |     |       |       |      |                   |
|------------|-----|-------|-------|------|-------------------|
| ceoA       | 55B | 26.49 | 87.72 | 1.97 | MultipleMeltPeaks |
| cepA       | 55B |       |       |      | NoAmplification   |
| cfiA       | 55B | 34.07 | 86.15 | 1.89 | MultipleMeltPeaks |
| cfr        | 55B |       |       |      | NoAmplification   |
| cfxA       | 55B |       |       |      | NoAmplification   |
| cmeA       | 55B |       |       |      | NoAmplification   |
| cmlA1-01   | 55B | 33.11 | 84.86 | 1.96 | MultipleMeltPeaks |
| cmlA1-02   | 55B | 38.53 | 81.83 | 1.96 | MultipleMeltPeaks |
| cmr        | 55B |       |       |      | NoAmplification   |
| cmx(A)     | 55B | 25.58 | 84.56 | 1.97 | MultipleMeltPeaks |
| cphA-01    | 55B | 33.39 | 85.62 | 1.95 |                   |
| cphA-02    | 55B | 31.87 | 82.44 | 1.96 |                   |
| dfrA1      | 55B | 37.84 | 74.12 | 1.87 |                   |
| dfrA12     | 55B |       |       |      | CurveFitFailed    |
| emrD       | 55B |       |       |      | CurveFitFailed    |
| ereA       | 55B | 36.24 | 83.2  | 1.87 |                   |
| ereB       | 55B | 37.92 | 80.84 | 1.75 | MultipleMeltPeaks |
| erm(34)    | 55B |       |       |      | NoAmplification   |
| erm(35)    | 55B |       |       |      | NoAmplification   |
| erm(36)    | 55B | 34.65 | 81.68 | 1.99 |                   |
| ermA       | 55B |       |       |      | NoAmplification   |
| ermA/ermTR | 55B | 28.88 | 75.74 | 2.03 |                   |
| ermB       | 55B | 26.72 | 74.91 | 2.07 |                   |
| ermC       | 55B | 40.49 | 78.26 | 1.78 |                   |
| ermF       | 55B |       |       |      | NoAmplification   |
| ermJ/ermD  | 55B |       |       |      | NoAmplification   |
| ermK-01    | 55B | 37.5  | 73.34 | 1.93 |                   |
| ermK-02    | 55B | 30.48 | 85.45 | 1.93 |                   |
| ermT-01    | 55B |       |       |      | NoAmplification   |
| ermT-02    | 55B | 39.44 | 72.27 | 1.79 |                   |
| ermX       | 55B | 28.3  | 83.64 | 1.89 |                   |
| ermY       | 55B |       |       |      | NoAmplification   |
| fabK       | 55B | 23.55 | 78.13 | 2.1  |                   |
| floR       | 55B |       |       |      | NoAmplification   |
| folA       | 55B |       |       |      | NoAmplification   |
| fosB       | 55B |       |       |      | CurveFitFailed    |
| fosX       | 55B |       |       |      | NoAmplification   |
| fox5       | 55B | 27.33 | 88.33 | 1.95 |                   |
| imiR       | 55B |       |       |      | NoAmplification   |
| ImrA-01    | 55B | 37.65 | 79.65 | 1.88 | MultipleMeltPeaks |
| intl       | 55B | 31.06 | 84.76 | 1.93 |                   |
| intl1      | 55B | 20.68 | 87.21 | 1.94 |                   |
| IS613      | 55B |       |       |      | NoAmplification   |
| lnuA-01    | 55B |       |       |      | NoAmplification   |
| lnuB-01    | 55B |       |       |      | NoAmplification   |
| lnuB-02    | 55B |       |       |      | NoAmplification   |

|               |     |       |       |      |                   |
|---------------|-----|-------|-------|------|-------------------|
| lnuC          | 55B | 35.91 | 84.02 | 1.7  | MultipleMeltPeaks |
| marR-01       | 55B | 33.01 | 85.22 | 1.92 |                   |
| matA/mel      | 55B | 18.29 | 77.58 | 2.1  |                   |
| mdet1         | 55B |       |       |      | NoAmplification   |
| mdtA          | 55B | 37.75 | 82.22 | 1.83 |                   |
| mdtE/yhiU     | 55B |       |       |      | NoAmplification   |
| mecA          | 55B |       |       |      | NoAmplification   |
| mefA          | 55B | 17.41 | 80.47 | 2.02 |                   |
| mepA          | 55B | 33.07 | 78.48 | 2    | MultipleMeltPeaks |
| mexA          | 55B |       |       |      | NoAmplification   |
| mexD          | 55B |       |       |      | NoAmplification   |
| mexE          | 55B |       |       |      | NoAmplification   |
| mexF          | 55B | 29.55 | 87.26 | 2.11 |                   |
| mphA-01       | 55B | 30.99 | 87.13 | 1.98 |                   |
| mphA-02       | 55B | 28.84 | 83.98 | 1.84 | MultipleMeltPeaks |
| mphB          | 55B | 39.01 | 79.87 | 1.76 | MultipleMeltPeaks |
| mphC          | 55B |       |       |      | CurveFitFailed    |
| msrA-01       | 55B |       |       |      | NoAmplification   |
| msrC-01       | 55B |       |       |      | NoAmplification   |
| mtrC-01       | 55B |       |       |      | NoAmplification   |
| mtrC-02       | 55B | 34.88 | 84.27 | 1.98 |                   |
| mtrD-02       | 55B | 29.41 | 81.15 | 1.85 |                   |
| mtrD-03       | 55B | 35.24 | 77.78 | 1.82 |                   |
| NDM1          | 55B |       |       |      | NoAmplification   |
| nimE          | 55B | 38.43 | 85.04 | 1.88 | MultipleMeltPeaks |
| nisB          | 55B |       |       |      | CurveFitFailed    |
| oleC          | 55B | 35.79 | 89.1  | 1.81 | MultipleMeltPeaks |
| oprD          | 55B | 29.23 | 81.91 | 2.02 |                   |
| oprJ          | 55B | 35.01 | 88.37 | 1.89 |                   |
| pbp           | 55B |       |       |      | NoAmplification   |
| pbp2x         | 55B |       |       |      | NoAmplification   |
| Pbp5          | 55B |       |       |      | NoAmplification   |
| penA          | 55B | 39.01 | 85.59 | 1.63 |                   |
| pikR1         | 55B | 38.41 | 63.54 | 1.94 | MultipleMeltPeaks |
| pikR2         | 55B | 31.76 | 84.84 | 1.98 |                   |
| pmrA          | 55B | 22.38 | 78.88 | 2.06 |                   |
| pncA          | 55B | 33.9  | 81.27 | 1.97 | MultipleMeltPeaks |
| putative mult | 55B | 37.73 | 77.16 | 1.81 | MultipleMeltPeaks |
| qac           | 55B |       |       |      | NoAmplification   |
| qacA          | 55B |       |       |      | NoAmplification   |
| qacA/qacB     | 55B |       |       |      | NoAmplification   |
| qacEdelta1-0  | 55B |       |       |      | NoAmplification   |
| qacEdelta1-0  | 55B | 27.72 | 78.48 | 2.03 |                   |
| qacH-01       | 55B | 34.21 | 86.37 | 1.91 |                   |
| qacH-02       | 55B | 37.76 | 83.95 | 1.58 |                   |
| qnrA          | 55B | 34.66 | 84.31 | 1.94 |                   |



|              |     |       |       |      |                   |
|--------------|-----|-------|-------|------|-------------------|
| rarD-02      | 55B | 27.86 | 79.94 | 1.67 |                   |
| sat4         | 55B |       |       |      | NoAmplification   |
| sdeB         | 55B |       |       |      | NoAmplification   |
| spcN-01      | 55B | 37.22 | 78.74 | 2.03 | MultipleMeltPeaks |
| speA         | 55B |       |       |      | NoAmplification   |
| str          | 55B |       |       |      | NoAmplification   |
| strA         | 55B |       |       |      | NoAmplification   |
| strB         | 55B |       |       |      | NoAmplification   |
| sul1         | 55B | 33.86 | 89.78 | 1.81 |                   |
| sul2         | 55B |       |       |      | NoAmplification   |
| sulA/foIP-01 | 55B | 24.22 | 81.44 | 1.97 |                   |
| sulA/foIP-03 | 55B | 22.38 | 83.97 | 2    |                   |
| tet(32)      | 55B |       |       |      | NoAmplification   |
| tet(34)      | 55B | 31.18 | 75.64 | 2.02 |                   |
| tet(35)      | 55B | 32.65 | 82.26 | 1.95 |                   |
| tet(36)-A    | 55B |       |       |      | CurveFitFailed    |
| tet(36)-B    | 55B |       |       |      | NoAmplification   |
| tet(37)      | 55B | 31.45 | 88.67 | 1.93 |                   |
| tetA-01      | 55B | 29.33 | 85.07 | 1.95 |                   |
| tetA-02      | 55B | 36.13 | 72.32 | 1.66 |                   |
| tetB-01      | 55B | 30.12 | 86.45 | 1.98 |                   |
| tetB-02      | 55B |       |       |      | CurveFitFailed    |
| tetC-01      | 55B |       |       |      | NoAmplification   |
| tetC-02      | 55B |       |       |      | NoAmplification   |
| tetD-01      | 55B |       |       |      | NoAmplification   |
| tetD-02      | 55B | 40    | 82.63 | 1.75 |                   |
| tetE         | 55B |       |       |      | NoAmplification   |
| tetG-01      | 55B | 32.43 | 87.69 | 1.96 |                   |
| tetG-02      | 55B |       |       |      | CurveFitFailed    |
| tetH         | 55B |       |       |      | NoAmplification   |
| tetJ         | 55B |       |       |      | NoAmplification   |
| tetK         | 55B |       |       |      | NoAmplification   |
| tetL-01      | 55B |       |       |      | CurveFitFailed    |
| tetL-02      | 55B | 33.84 | 85.25 | 1.73 |                   |
| tetM-01      | 55B | 20.37 | 76.31 | 2.01 |                   |
| tetM-02      | 55B | 19.71 | 77.83 | 2.06 |                   |
| tetO-01      | 55B |       |       |      | NoAmplification   |
| tetPA        | 55B |       |       |      | NoAmplification   |
| tetPB-01     | 55B |       |       |      | NoAmplification   |
| tetPB-02     | 55B | 29.3  | 84.82 | 1.99 |                   |
| tetPB-03     | 55B |       |       |      | NoAmplification   |
| tetPB-05     | 55B |       |       |      | NoAmplification   |
| tetQ         | 55B |       |       |      | NoAmplification   |
| tetR-02      | 55B | 33.17 | 89.04 | 1.79 |                   |
| tetR-03      | 55B |       |       |      | NoAmplification   |
| tetS         | 55B | 35.31 | 73.66 | 2.07 |                   |

|             |     |       |       |      |                              |
|-------------|-----|-------|-------|------|------------------------------|
| tetT        | 55B |       |       |      | CurveFitFailed               |
| tetU-01     | 55B |       |       |      | NoAmplification              |
| tetV        | 55B | 37.77 | 73.64 | 1.96 |                              |
| tetW-01     | 55B |       |       |      | NoAmplification              |
| tetX        | 55B |       |       |      | BadR2, HighEfficiency, Ctls' |
| tnpA-01     | 55B | 35.77 | 79.19 | 1.92 | MultipleMeltPeaks            |
| tnpA-02     | 55B | 38.94 | 84.44 | 1.56 | MultipleMeltPeaks            |
| tnpA-03     | 55B | 33.87 | 77.65 | 2.07 |                              |
| tnpA-04     | 55B | 33.5  | 78.66 | 1.95 |                              |
| tnpA-05     | 55B | 26.82 | 80.89 | 1.93 |                              |
| tnpA-07     | 55B |       |       |      | CurveFitFailed               |
| tolC-01     | 55B | 26.73 | 79.35 | 1.96 |                              |
| tolC-02     | 55B | 29.13 | 83.76 | 1.99 | MultipleMeltPeaks            |
| tolC-03     | 55B | 30.51 | 85.15 | 1.88 | MultipleMeltPeaks            |
| Tp614       | 55B | 32.68 | 83.22 | 2    |                              |
| ttgA        | 55B | 38.43 | 83.9  | 1.87 | MultipleMeltPeaks            |
| ttgB        | 55B | 36.72 | 83.98 | 1.8  | MultipleMeltPeaks            |
| vanA        | 55B |       |       |      | NoAmplification              |
| vanB-01     | 55B | 32.67 | 83.62 | 2    |                              |
| vanC-01     | 55B |       |       |      | NoAmplification              |
| vanC-02     | 55B |       |       |      | NoAmplification              |
| vanC-03     | 55B | 26.14 | 85.75 | 1.92 |                              |
| vanC1       | 55B |       |       |      | CurveFitFailed               |
| vanC2/vanC3 | 55B | 30.87 | 82.78 | 1.98 | MultipleMeltPeaks            |
| vanG        | 55B |       |       |      | NoAmplification              |
| vanHB       | 55B |       |       |      | NoAmplification              |
| vanHD       | 55B | 37.76 | 78.38 | 1.76 |                              |
| vanRA-01    | 55B |       |       |      | NoAmplification              |
| vanRA-02    | 55B |       |       |      | NoAmplification              |
| vanRB       | 55B | 34.97 | 87.4  | 1.93 |                              |
| vanRC       | 55B |       |       |      | NoAmplification              |
| vanRC4      | 55B |       |       |      | NoAmplification              |
| vanRD       | 55B |       |       |      | NoAmplification              |
| vanSA       | 55B |       |       |      | NoAmplification              |
| vanSB       | 55B | 30.01 | 74.71 | 2.09 |                              |
| vanSC-01    | 55B | 30.57 | 84.05 | 1.99 |                              |
| vanSC-02    | 55B |       |       |      | NoAmplification              |
| vanTC-01    | 55B |       |       |      | NoAmplification              |
| vanTC-02    | 55B | 37.09 | 82.65 | 1.8  |                              |
| vanTE       | 55B |       |       |      | CurveFitFailed               |
| vanTG       | 55B | 38.3  | 73.47 | 1.86 |                              |
| vanWB       | 55B |       |       |      | NoAmplification              |
| vanWG       | 55B | 34.74 | 75.86 | 1.95 |                              |
| vanXA       | 55B | 36.59 | 79.68 | 1.82 |                              |
| vanXB       | 55B |       |       |      | NoAmplification              |
| vanXD       | 55B | 28.96 | 75.85 | 2.05 |                              |

|              |     |       |       |      |                           |
|--------------|-----|-------|-------|------|---------------------------|
| vanYB        | 55B |       |       |      | CtIsLarge, CurveFitFailed |
| vanYD-01     | 55B | 29.76 | 82.85 | 1.94 | MultipleMeltPeaks         |
| vanYD-02     | 55B |       |       |      | NoAmplification           |
| vatB-01      | 55B | 33.73 | 75.04 | 2.02 |                           |
| vatB-02      | 55B | 37.57 | 86.76 | 1.88 | MultipleMeltPeaks         |
| vatC-01      | 55B | 35.81 | 81.21 | 1.88 |                           |
| vatC-02      | 55B | 34.45 | 87.5  | 1.93 |                           |
| vatE-01      | 55B | 30.75 | 76.79 | 2.08 |                           |
| vatE-02      | 55B |       |       |      | NoAmplification           |
| vgaA-01      | 55B |       |       |      | NoAmplification           |
| vgaA-02      | 55B |       |       |      | NoAmplification           |
| vgb-01       | 55B | 38.42 | 63.35 | 1.88 | MultipleMeltPeaks         |
| vgbB-01      | 55B |       |       |      | CurveFitFailed            |
| vgbB-02      | 55B |       |       |      | NoAmplification           |
| yceE/mdtG-0  | 55B | 28.28 | 80.67 | 1.91 |                           |
| yceE/mdtG-0  | 55B |       |       |      | NoAmplification           |
| yceL/mdtH-0  | 55B | 29.78 | 82.93 | 1.93 | MultipleMeltPeaks         |
| yceL/mdtH-0  | 55B |       |       |      | CurveFitFailed            |
| yceL/mdtH-0  | 55B | 28.6  | 79.71 | 1.97 |                           |
| yidY/mdtL-01 | 55B | 31.1  | 80.34 | 1.97 |                           |
| yidY/mdtL-02 | 55B | 27.67 | 79.19 | 1.98 |                           |































| Assay          | Sample | Ct | Tm    | Efficiency | flag                   |
|----------------|--------|----|-------|------------|------------------------|
| 16S rRNA       | 55C    |    | 17.36 | 82.42      | 2                      |
| aac            | 55C    |    | 31.36 | 90.16      | 1.55 MultipleMeltPeaks |
| aac(6')-Ib(akz | 55C    |    |       |            | NoAmplification        |
| aac(6')-Ib(akz | 55C    |    | 32.05 | 80.53      | 1.95                   |
| aac(6')-Ib(akz | 55C    |    | 35.35 | 87.02      | 1.83 MultipleMeltPeaks |
| aac(6')-II     | 55C    |    | 42.38 | 81         | 1.44                   |
| aac(6')I1      | 55C    |    |       |            | NoAmplification        |
| aacA/aphD      | 55C    |    |       |            | NoAmplification        |
| aacC           | 55C    |    | 35.04 | 86.4       | 1.86 MultipleMeltPeaks |
| aacC1          | 55C    |    | 25.88 | 81.87      | 1.95                   |
| aacC2          | 55C    |    |       |            | NoAmplification        |
| aacC4          | 55C    |    |       |            | NoAmplification        |
| aadA-01        | 55C    |    | 28.79 | 81.96      | 1.97                   |
| aadA-02        | 55C    |    | 28.25 | 82.14      | 1.98                   |
| aadA-1-01      | 55C    |    |       |            | NoAmplification        |
| aadA-1-02      | 55C    |    | 35.07 | 72.86      | 1.98                   |
| aadA1          | 55C    |    | 36.87 | 83.39      | 1.85                   |
| aadA2-01       | 55C    |    | 29.95 | 80.65      | 1.92                   |
| aadA2-02       | 55C    |    | 32.43 | 75.25      | 1.96                   |
| aadA2-03       | 55C    |    |       |            | NoAmplification        |
| aadA5-01       | 55C    |    | 41.08 | 63.9       | 1.68 MultipleMeltPeaks |
| aadA5-02       | 55C    |    | 38.9  | 86.9       | 1.7 MultipleMeltPeaks  |
| aadA9-01       | 55C    |    | 38.23 | 89.63      | 1.81                   |
| aadA9-02       | 55C    |    |       |            | NoAmplification        |
| aadD           | 55C    |    |       |            | NoAmplification        |
| aadE           | 55C    |    |       |            | NoAmplification        |
| acrA-01        | 55C    |    | 37.47 | 83.93      | 1.79 MultipleMeltPeaks |
| acrA-02        | 55C    |    | 29.16 | 82.77      | 1.88                   |
| acrA-03        | 55C    |    | 40.77 | 78.07      | 1.75 MultipleMeltPeaks |
| acrA-04        | 55C    |    | 31.6  | 80.43      | 1.97                   |
| acrA-05        | 55C    |    | 31.99 | 80.29      | 1.96                   |
| acrB-01        | 55C    |    | 28.88 | 82.24      | 1.97                   |
| acrF           | 55C    |    | 28.56 | 82.43      | 1.94                   |
| acrR-01        | 55C    |    | 37.92 | 81.04      | 1.86                   |
| acrR-02        | 55C    |    | 38.47 | 78.03      | 1.78 MultipleMeltPeaks |
| Actin          | 55C    |    | 21.31 | 87.09      | 2.01 MultipleMeltPeaks |
| adeA           | 55C    |    | 35.96 | 82.4       | 1.87                   |
| ampC-01        | 55C    |    | 36.56 | 81.91      | 1.74 MultipleMeltPeaks |
| ampC-02        | 55C    |    | 29.32 | 81.86      | 1.93                   |
| ampC-04        | 55C    |    | 34.38 | 77.88      | 2.01                   |
| ampC-05        | 55C    |    |       |            | NoAmplification        |
| ampC-06        | 55C    |    |       |            | NoAmplification        |
| ampC-07        | 55C    |    |       |            | NoAmplification        |
| ampC-09        | 55C    |    |       |            | NoAmplification        |
| ampC/blaDH     | 55C    |    | 29.99 | 84.06      | 1.95                   |

|                          |     |       |       |      |                   |
|--------------------------|-----|-------|-------|------|-------------------|
| aph                      | 55C |       |       |      | NoAmplification   |
| aph(2')-Id-01            | 55C |       |       |      | NoAmplification   |
| aph(2')-Id-02            | 55C |       |       |      | NoAmplification   |
| aph6ia                   | 55C | 41.55 | 77.54 | 1.8  | MultipleMeltPeaks |
| aphA1(aka k <sub>z</sub> | 55C |       |       |      | NoAmplification   |
| bacA-01                  | 55C |       |       |      | NoAmplification   |
| bacA-02                  | 55C | 41.24 | 88.09 | 1.57 | MultipleMeltPeaks |
| BETA-globin              | 55C | 23.55 | 84.08 | 1.98 |                   |
| bla-ACC-1                | 55C | 37.86 | 85.96 | 1.72 | MultipleMeltPeaks |
| bla-L1                   | 55C | 31.83 | 85.46 | 1.94 |                   |
| bla1                     | 55C |       |       |      | NoAmplification   |
| blaCMY                   | 55C | 31.16 | 76.78 | 1.93 |                   |
| blaCMY2-01               | 55C |       |       |      | NoAmplification   |
| blaCMY2-02               | 55C | 29    | 82.4  | 1.92 | MultipleMeltPeaks |
| blaCTX-M-01              | 55C |       |       |      | NoAmplification   |
| blaCTX-M-02              | 55C | 36.84 | 79.77 | 1.75 |                   |
| blaCTX-M-03              | 55C |       |       |      | NoAmplification   |
| blaCTX-M-04              | 55C | 35.67 | 80.81 | 1.93 | MultipleMeltPeaks |
| blaCTX-M-05              | 55C | 35.48 | 75.74 | 1.7  |                   |
| blaCTX-M-06              | 55C |       |       |      | CurveFitFailed    |
| blaGES                   | 55C |       |       |      | NoAmplification   |
| blaIMP-01                | 55C |       |       |      | NoAmplification   |
| blaIMP-02                | 55C | 35.51 | 78.35 | 1.96 |                   |
| blaMOX/blaC              | 55C |       |       |      | NoAmplification   |
| blaOCH                   | 55C |       |       |      | NoAmplification   |
| blaOKP                   | 55C |       |       |      | NoAmplification   |
| blaOXA1/blaC             | 55C |       |       |      | NoAmplification   |
| blaOXA10-01              | 55C |       |       |      | NoAmplification   |
| blaOXA10-02              | 55C |       |       |      | NoAmplification   |
| blaOXY                   | 55C | 40.73 | 76.79 | 1.68 | MultipleMeltPeaks |
| blaPAO                   | 55C |       |       |      | NoAmplification   |
| blaPER                   | 55C | 37.63 | 69.53 | 1.74 |                   |
| blaPSE                   | 55C |       |       |      | NoAmplification   |
| blaROB                   | 55C | 40.09 | 62.76 | 1.74 | MultipleMeltPeaks |
| blaSFO                   | 55C | 36.45 | 81.5  | 1.83 |                   |
| blaSHV-01                | 55C | 38.09 | 80.64 | 1.81 |                   |
| blaSHV-02                | 55C |       |       |      | NoAmplification   |
| blaTEM                   | 55C |       |       |      | NoAmplification   |
| blaTLA                   | 55C |       |       |      | NoAmplification   |
| blaVEB                   | 55C |       |       |      | NoAmplification   |
| blaVIM                   | 55C |       |       |      | NoAmplification   |
| blaZ                     | 55C |       |       |      | NoAmplification   |
| carB                     | 55C |       |       |      | CurveFitFailed    |
| catA1                    | 55C |       |       |      | NoAmplification   |
| catB3                    | 55C | 33.45 | 87.5  | 1.97 |                   |
| catB8                    | 55C | 30.5  | 81.45 | 1.99 |                   |

|            |     |       |       |      |                              |
|------------|-----|-------|-------|------|------------------------------|
| ceoA       | 55C | 27.38 | 82.32 | 1.97 |                              |
| cepA       | 55C |       |       |      | NoAmplification              |
| cfiA       | 55C | 36.39 | 86.98 | 1.81 |                              |
| cfr        | 55C |       |       |      | NoAmplification              |
| cfxA       | 55C |       |       |      | NoAmplification              |
| cmeA       | 55C | 40.72 | 82.09 | 1.66 | MultipleMeltPeaks            |
| cmlA1-01   | 55C |       |       |      | NoAmplification              |
| cmlA1-02   | 55C |       |       |      | NoAmplification              |
| cmr        | 55C |       |       |      | NoAmplification              |
| cmx(A)     | 55C | 27.98 | 86.33 | 1.99 | MultipleMeltPeaks            |
| cphA-01    | 55C | 36.24 | 85.48 | 1.85 | MultipleMeltPeaks            |
| cphA-02    | 55C |       |       |      | CurveFitFailed               |
| dfrA1      | 55C |       |       |      | NoAmplification              |
| dfrA12     | 55C | 38.49 | 61.54 | 1.82 | MultipleMeltPeaks            |
| emrD       | 55C |       |       |      | NoAmplification              |
| ereA       | 55C | 34.92 | 83.12 | 1.9  |                              |
| ereB       | 55C | 38.74 | 80.77 | 1.79 | MultipleMeltPeaks            |
| erm(34)    | 55C |       |       |      | NoAmplification              |
| erm(35)    | 55C |       |       |      | NoAmplification              |
| erm(36)    | 55C |       |       |      | NoAmplification              |
| ermA       | 55C |       |       |      | NoAmplification              |
| ermA/ermTR | 55C |       |       |      | NoAmplification              |
| ermB       | 55C |       |       |      | NoAmplification              |
| ermC       | 55C |       |       |      | NoAmplification              |
| ermF       | 55C |       |       |      | NoAmplification              |
| ermJ/ermD  | 55C |       |       |      | NoAmplification              |
| ermK-01    | 55C |       |       |      | NoAmplification              |
| ermK-02    | 55C | 36.43 | 85.18 | 1.79 |                              |
| ermT-01    | 55C |       |       |      | NoAmplification              |
| ermT-02    | 55C |       |       |      | CurveFitFailed               |
| ermX       | 55C | 28.22 | 83.6  | 1.89 |                              |
| ermY       | 55C |       |       |      | NoAmplification              |
| fabK       | 55C | 21.43 | 77.32 | 2.1  |                              |
| floR       | 55C |       |       |      | NoAmplification              |
| folA       | 55C | 36.64 | 81.44 | 1.81 |                              |
| fosB       | 55C |       |       |      | LowEfficiency, CtIsSmall, Se |
| fosX       | 55C |       |       |      | NoAmplification              |
| fox5       | 55C | 31.45 | 87.11 | 1.96 |                              |
| imiR       | 55C |       |       |      | NoAmplification              |
| ImrA-01    | 55C |       |       |      | NoAmplification              |
| intl       | 55C | 30.84 | 84.73 | 1.94 |                              |
| intl1      | 55C | 21.84 | 87.08 | 1.95 |                              |
| IS613      | 55C |       |       |      | NoAmplification              |
| lnuA-01    | 55C |       |       |      | NoAmplification              |
| lnuB-01    | 55C |       |       |      | NoAmplification              |
| lnuB-02    | 55C |       |       |      | NoAmplification              |

|               |     |       |       |      |                   |
|---------------|-----|-------|-------|------|-------------------|
| lnuC          | 55C | 37.49 | 80.98 | 1.71 | MultipleMeltPeaks |
| marR-01       | 55C | 39.03 | 85.46 | 1.78 |                   |
| matA/mel      | 55C | 22.78 | 77.55 | 2.04 |                   |
| mdet1         | 55C |       |       |      | NoAmplification   |
| mdtA          | 55C | 37.65 | 81.9  | 1.77 | MultipleMeltPeaks |
| mdtE/yhiU     | 55C |       |       |      | NoAmplification   |
| mecA          | 55C |       |       |      | NoAmplification   |
| mefA          | 55C | 22.16 | 80.45 | 1.97 |                   |
| mepA          | 55C | 35.32 | 79.71 | 1.92 | MultipleMeltPeaks |
| mexA          | 55C |       |       |      | NoAmplification   |
| mexD          | 55C |       |       |      | CurveFitFailed    |
| mexE          | 55C |       |       |      | NoAmplification   |
| mexF          | 55C | 28.29 | 88.91 | 1.99 |                   |
| mphA-01       | 55C | 31.86 | 80.41 | 1.92 | MultipleMeltPeaks |
| mphA-02       | 55C | 30.52 | 86.74 | 1.92 |                   |
| mphB          | 55C |       |       |      | NoAmplification   |
| mphC          | 55C |       |       |      | NoAmplification   |
| msrA-01       | 55C |       |       |      | NoAmplification   |
| msrC-01       | 55C |       |       |      | NoAmplification   |
| mtrC-01       | 55C |       |       |      | NoAmplification   |
| mtrC-02       | 55C |       |       |      | NoAmplification   |
| mtrD-02       | 55C | 29.53 | 81.26 | 1.95 |                   |
| mtrD-03       | 55C |       |       |      | CurveFitFailed    |
| NDM1          | 55C |       |       |      | NoAmplification   |
| nimE          | 55C | 35.15 | 75.5  | 2.05 |                   |
| nisB          | 55C |       |       |      | NoAmplification   |
| oleC          | 55C | 41.24 | 61.62 | 1.63 | MultipleMeltPeaks |
| oprD          | 55C | 28.93 | 81.49 | 1.96 |                   |
| oprJ          | 55C |       |       |      | NoAmplification   |
| pbp           | 55C |       |       |      | NoAmplification   |
| pbp2x         | 55C | 19.49 | 75.87 | 1.99 |                   |
| Pbp5          | 55C |       |       |      | NoAmplification   |
| penA          | 55C |       |       |      | NoAmplification   |
| pikR1         | 55C | 35.99 | 74.71 | 2.11 |                   |
| pikR2         | 55C | 31.88 | 84.89 | 1.98 |                   |
| pmrA          | 55C | 19.45 | 79.89 | 2.04 |                   |
| pncA          | 55C |       |       |      | CurveFitFailed    |
| putative mult | 55C |       |       |      | NoAmplification   |
| qac           | 55C |       |       |      | NoAmplification   |
| qacA          | 55C | 38.63 | 69.97 | 1.85 |                   |
| qacA/qacB     | 55C |       |       |      | NoAmplification   |
| qacEdelta1-0  | 55C |       |       |      | NoAmplification   |
| qacEdelta1-0  | 55C | 36.57 | 88.26 | 1.82 | MultipleMeltPeaks |
| qacH-01       | 55C | 36.19 | 77.16 | 1.82 | MultipleMeltPeaks |
| qacH-02       | 55C | 36.25 | 86.65 | 1.78 |                   |
| qnrA          | 55C | 40.06 | 80.23 | 1.79 |                   |

|              |     |       |       |      |                   |
|--------------|-----|-------|-------|------|-------------------|
| rarD-02      | 55C |       |       |      | NoAmplification   |
| sat4         | 55C |       |       |      | NoAmplification   |
| sdeB         | 55C |       |       |      | NoAmplification   |
| spcN-01      | 55C |       |       |      | NoAmplification   |
| speA         | 55C |       |       |      | NoAmplification   |
| str          | 55C |       |       |      | NoAmplification   |
| strA         | 55C |       |       |      | NoAmplification   |
| strB         | 55C |       |       |      | NoAmplification   |
| sul1         | 55C |       |       |      | NoAmplification   |
| sul2         | 55C |       |       |      | NoAmplification   |
| sulA/foIP-01 | 55C | 20.53 | 80.83 | 1.96 |                   |
| sulA/foIP-03 | 55C | 18.67 | 83.62 | 1.99 |                   |
| tet(32)      | 55C |       |       |      | NoAmplification   |
| tet(34)      | 55C | 35.16 | 74.75 | 1.96 |                   |
| tet(35)      | 55C |       |       |      | NoAmplification   |
| tet(36)-A    | 55C |       |       |      | CurveFitFailed    |
| tet(36)-B    | 55C |       |       |      | NoAmplification   |
| tet(37)      | 55C | 32.22 | 85.21 | 1.94 | MultipleMeltPeaks |
| tetA-01      | 55C | 29.01 | 85.13 | 1.92 |                   |
| tetA-02      | 55C |       |       |      | NoAmplification   |
| tetB-01      | 55C | 32.65 | 86.06 | 1.96 |                   |
| tetB-02      | 55C | 36.22 | 82.29 | 1.84 | MultipleMeltPeaks |
| tetC-01      | 55C |       |       |      | NoAmplification   |
| tetC-02      | 55C |       |       |      | NoAmplification   |
| tetD-01      | 55C |       |       |      | NoAmplification   |
| tetD-02      | 55C |       |       |      | NoAmplification   |
| tetE         | 55C |       |       |      | NoAmplification   |
| tetG-01      | 55C |       |       |      | NoAmplification   |
| tetG-02      | 55C |       |       |      | CurveFitFailed    |
| tetH         | 55C |       |       |      | NoAmplification   |
| tetJ         | 55C |       |       |      | NoAmplification   |
| tetK         | 55C |       |       |      | NoAmplification   |
| tetL-01      | 55C |       |       |      | NoAmplification   |
| tetL-02      | 55C | 38.5  | 85.44 | 1.58 |                   |
| tetM-01      | 55C | 23.86 | 76.13 | 2    |                   |
| tetM-02      | 55C | 24.84 | 77.62 | 2.03 |                   |
| tetO-01      | 55C |       |       |      | NoAmplification   |
| tetPA        | 55C |       |       |      | NoAmplification   |
| tetPB-01     | 55C |       |       |      | NoAmplification   |
| tetPB-02     | 55C | 34.33 | 85.42 | 1.94 |                   |
| tetPB-03     | 55C |       |       |      | NoAmplification   |
| tetPB-05     | 55C |       |       |      | NoAmplification   |
| tetQ         | 55C |       |       |      | CurveFitFailed    |
| tetR-02      | 55C | 32.47 | 88.88 | 1.9  |                   |
| tetR-03      | 55C |       |       |      | NoAmplification   |
| tetS         | 55C | 39.24 | 86.99 | 1.71 | MultipleMeltPeaks |

|             |     |       |       |      |                   |
|-------------|-----|-------|-------|------|-------------------|
| tetT        | 55C |       |       |      | NoAmplification   |
| tetU-01     | 55C |       |       |      | NoAmplification   |
| tetV        | 55C | 28.38 | 81.48 | 1.95 |                   |
| tetW-01     | 55C |       |       |      | NoAmplification   |
| tetX        | 55C | 41.54 | 82.01 | 1.65 | MultipleMeltPeaks |
| tnpA-01     | 55C | 38.51 | 86.4  | 1.91 | MultipleMeltPeaks |
| tnpA-02     | 55C |       |       |      | CurveFitFailed    |
| tnpA-03     | 55C |       |       |      | CurveFitFailed    |
| tnpA-04     | 55C | 41.39 | 64.26 | 1.5  | MultipleMeltPeaks |
| tnpA-05     | 55C |       |       |      | NoAmplification   |
| tnpA-07     | 55C | 38.31 | 75.49 | 1.74 |                   |
| tolC-01     | 55C |       |       |      | NoAmplification   |
| tolC-02     | 55C | 31.5  | 83.62 | 1.96 |                   |
| tolC-03     | 55C | 37.35 | 83.26 | 1.82 |                   |
| Tp614       | 55C | 37.15 | 83.23 | 1.8  |                   |
| ttgA        | 55C |       |       |      | NoAmplification   |
| ttgB        | 55C | 33.66 | 87.94 | 1.95 |                   |
| vanA        | 55C |       |       |      | NoAmplification   |
| vanB-01     | 55C |       |       |      | CurveFitFailed    |
| vanC-01     | 55C |       |       |      | NoAmplification   |
| vanC-02     | 55C |       |       |      | NoAmplification   |
| vanC-03     | 55C | 27.24 | 85.9  | 1.95 |                   |
| vanC1       | 55C |       |       |      | NoAmplification   |
| vanC2/vanC3 | 55C | 34.55 | 81.6  | 2.07 |                   |
| vanG        | 55C |       |       |      | NoAmplification   |
| vanHB       | 55C | 32.13 | 79.13 | 1.96 |                   |
| vanHD       | 55C | 35.58 | 78.64 | 1.88 | MultipleMeltPeaks |
| vanRA-01    | 55C |       |       |      | NoAmplification   |
| vanRA-02    | 55C | 36.48 | 80.62 | 1.84 |                   |
| vanRB       | 55C | 34.7  | 87.49 | 1.88 |                   |
| vanRC       | 55C |       |       |      | NoAmplification   |
| vanRC4      | 55C |       |       |      | NoAmplification   |
| vanRD       | 55C |       |       |      | NoAmplification   |
| vanSA       | 55C |       |       |      | NoAmplification   |
| vanSB       | 55C | 30.54 | 74.35 | 2.06 |                   |
| vanSC-01    | 55C | 40.99 | 84.07 | 1.74 |                   |
| vanSC-02    | 55C |       |       |      | NoAmplification   |
| vanTC-01    | 55C |       |       |      | NoAmplification   |
| vanTC-02    | 55C |       |       |      | NoAmplification   |
| vanTE       | 55C |       |       |      | NoAmplification   |
| vanTG       | 55C |       |       |      | CurveFitFailed    |
| vanWB       | 55C |       |       |      | NoAmplification   |
| vanWG       | 55C | 38.03 | 73.9  | 1.85 |                   |
| vanXA       | 55C |       |       |      | CurveFitFailed    |
| vanXB       | 55C |       |       |      | NoAmplification   |
| vanXD       | 55C | 31.46 | 75    | 2.06 |                   |

|              |     |       |       |      |                   |
|--------------|-----|-------|-------|------|-------------------|
| vanYB        | 55C |       |       |      | CurveFitFailed    |
| vanYD-01     | 55C | 31.79 | 81.75 | 1.83 | MultipleMeltPeaks |
| vanYD-02     | 55C |       |       |      | NoAmplification   |
| vatB-01      | 55C |       |       |      | NoAmplification   |
| vatB-02      | 55C |       |       |      | NoAmplification   |
| vatC-01      | 55C |       |       |      | NoAmplification   |
| vatC-02      | 55C |       |       |      | CurveFitFailed    |
| vatE-01      | 55C | 31.6  | 75.93 | 1.94 | MultipleMeltPeaks |
| vatE-02      | 55C |       |       |      | NoAmplification   |
| vgaA-01      | 55C |       |       |      | NoAmplification   |
| vgaA-02      | 55C |       |       |      | NoAmplification   |
| vgb-01       | 55C |       |       |      | NoAmplification   |
| vgbB-01      | 55C |       |       |      | NoAmplification   |
| vgbB-02      | 55C |       |       |      | NoAmplification   |
| yceE/mdtG-0  | 55C | 29.31 | 80.62 | 1.93 |                   |
| yceE/mdtG-0  | 55C | 35.39 | 74.01 | 1.98 |                   |
| yceL/mdtH-0  | 55C | 36.48 | 83.98 | 1.75 | MultipleMeltPeaks |
| yceL/mdtH-0  | 55C |       |       |      | NoAmplification   |
| yceL/mdtH-0  | 55C |       |       |      | CurveFitFailed    |
| yidY/mdtL-01 | 55C | 33.21 | 85.33 | 1.94 |                   |
| yidY/mdtL-02 | 55C |       |       |      | NoAmplification   |



































aturationBaselineRatiolsLow, CurveFitFailed

| Assay          | Sample | Ct | Tm    | Efficiency | Flags                  |
|----------------|--------|----|-------|------------|------------------------|
| 16S rRNA       | C1     |    | 16.47 | 81.99      | 1.95                   |
| aac            | C1     |    | 31.86 | 81.87      | 1.93                   |
| aac(6')-Ib(akz | C1     |    |       |            | NoAmplification        |
| aac(6')-Ib(akz | C1     |    | 33.03 | 80.12      | 1.99                   |
| aac(6')-Ib(akz | C1     |    | 32.55 | 78.85      | 1.99                   |
| aac(6')-II     | C1     |    | 32.87 | 81.13      | 1.94 MultipleMeltPeaks |
| aac(6')I1      | C1     |    | 38.01 | 85.44      | 1.85 MultipleMeltPeaks |
| aacA/aphD      | C1     |    |       |            | NoAmplification        |
| aacC           | C1     |    | 27.6  | 87.79      | 1.89 MultipleMeltPeaks |
| aacC1          | C1     |    |       |            | CurveFitFailed         |
| aacC2          | C1     |    |       |            | NoAmplification        |
| aacC4          | C1     |    | 32.58 | 89.48      | 1.97 MultipleMeltPeaks |
| aadA-01        | C1     |    | 38.87 | 61.55      | 1.66 MultipleMeltPeaks |
| aadA-02        | C1     |    | 33.74 | 80.46      | 1.95                   |
| aadA-1-01      | C1     |    | 35.63 | 81.41      | 1.94 MultipleMeltPeaks |
| aadA-1-02      | C1     |    |       |            | NoAmplification        |
| aadA1          | C1     |    | 32.68 | 85.5       | 2.01                   |
| aadA2-01       | C1     |    | 38.27 | 82.02      | 1.65 MultipleMeltPeaks |
| aadA2-02       | C1     |    | 33.15 | 75.39      | 1.98                   |
| aadA2-03       | C1     |    |       |            | NoAmplification        |
| aadA5-01       | C1     |    | 36.85 | 88.81      | 1.77                   |
| aadA5-02       | C1     |    | 32.82 | 77.79      | 1.96 MultipleMeltPeaks |
| aadA9-01       | C1     |    |       |            | CurveFitFailed         |
| aadA9-02       | C1     |    | 31.31 | 80.36      | 1.95                   |
| aadD           | C1     |    |       |            | NoAmplification        |
| aadE           | C1     |    | 39.11 | 73.25      | 1.8                    |
| acrA-01        | C1     |    | 32.01 | 88.7       | 1.86                   |
| acrA-02        | C1     |    | 30.8  | 88.29      | 1.92                   |
| acrA-03        | C1     |    | 37.51 | 85.95      | 1.74 MultipleMeltPeaks |
| acrA-04        | C1     |    | 29.99 | 80.65      | 1.99 MultipleMeltPeaks |
| acrA-05        | C1     |    | 32.87 | 79.84      | 1.94 MultipleMeltPeaks |
| acrB-01        | C1     |    |       |            | NoAmplification        |
| acrF           | C1     |    | 28.45 | 84.6       | 1.85                   |
| acrR-01        | C1     |    | 33.43 | 89.59      | 1.9 MultipleMeltPeaks  |
| acrR-02        | C1     |    | 37.9  | 85.39      | 1.84                   |
| Actin          | C1     |    | 22.76 | 87.1       | 1.94                   |
| adeA           | C1     |    | 35.83 | 83.61      | 1.83                   |
| ampC-01        | C1     |    | 31.58 | 80.28      | 1.97 MultipleMeltPeaks |
| ampC-02        | C1     |    | 37.67 | 79.52      | 1.88 MultipleMeltPeaks |
| ampC-04        | C1     |    | 32.88 | 78.39      | 1.93 MultipleMeltPeaks |
| ampC-05        | C1     |    | 38.74 | 91.14      | 1.62 MultipleMeltPeaks |
| ampC-06        | C1     |    | 38.43 | 71.29      | 1.78 MultipleMeltPeaks |
| ampC-07        | C1     |    | 37.01 | 82.66      | 1.8                    |
| ampC-09        | C1     |    | 39.46 | 91.57      | 1.61 MultipleMeltPeaks |
| ampC/blaDH     | C1     |    | 31.21 | 85.25      | 1.97                   |



|                          |    |       |       |      |                   |
|--------------------------|----|-------|-------|------|-------------------|
| aph                      | C1 |       |       |      | NoAmplification   |
| aph(2')-Id-01            | C1 |       |       |      | NoAmplification   |
| aph(2')-Id-02            | C1 |       |       |      | NoAmplification   |
| aph6ia                   | C1 | 31.25 | 78.19 | 1.94 |                   |
| aphA1(aka k <sub>z</sub> | C1 |       |       |      | NoAmplification   |
| bacA-01                  | C1 | 38.55 | 83.58 | 1.69 | MultipleMeltPeaks |
| bacA-02                  | C1 | 39.21 | 83.81 | 1.64 |                   |
| BETA-globin              | C1 | 24.21 | 84.01 | 2    |                   |
| bla-ACC-1                | C1 | 36.4  | 78.26 | 1.81 | MultipleMeltPeaks |
| bla-L1                   | C1 | 34.88 | 79.99 | 1.93 | MultipleMeltPeaks |
| bla1                     | C1 |       |       |      | NoAmplification   |
| blaCMY                   | C1 | 36.38 | 80.34 | 1.9  |                   |
| blaCMY2-01               | C1 | 36.01 | 83.56 | 1.91 |                   |
| blaCMY2-02               | C1 | 28.96 | 83.1  | 1.96 | MultipleMeltPeaks |
| blaCTX-M-01              | C1 | 27.92 | 87.6  | 1.98 |                   |
| blaCTX-M-02              | C1 | 32.27 | 79.89 | 1.91 | MultipleMeltPeaks |
| blaCTX-M-03              | C1 |       |       |      | NoAmplification   |
| blaCTX-M-04              | C1 | 30.75 | 88.03 | 1.93 |                   |
| blaCTX-M-05              | C1 | 29.73 | 77.19 | 1.74 |                   |
| blaCTX-M-06              | C1 |       |       |      | NoAmplification   |
| blaGES                   | C1 |       |       |      | NoAmplification   |
| blaIMP-01                | C1 |       |       |      | NoAmplification   |
| blaIMP-02                | C1 | 37.31 | 74.9  | 2.22 |                   |
| blaMOX/blaC              | C1 |       |       |      | NoAmplification   |
| blaOCH                   | C1 |       |       |      | NoAmplification   |
| blaOKP                   | C1 |       |       |      | NoAmplification   |
| blaOXA1/blaC             | C1 |       |       |      | NoAmplification   |
| blaOXA10-01              | C1 |       |       |      | NoAmplification   |
| blaOXA10-02              | C1 |       |       |      | NoAmplification   |
| blaOXY                   | C1 | 34.3  | 82.41 | 1.79 | MultipleMeltPeaks |
| blaPAO                   | C1 |       |       |      | NoAmplification   |
| blaPER                   | C1 | 35.69 | 77.8  | 1.88 |                   |
| blaPSE                   | C1 |       |       |      | NoAmplification   |
| blaROB                   | C1 |       |       |      | NoAmplification   |
| blaSFO                   | C1 | 31.8  | 82.31 | 1.94 | MultipleMeltPeaks |
| blaSHV-01                | C1 | 35.03 | 72.52 | 1.85 | MultipleMeltPeaks |
| blaSHV-02                | C1 | 38.35 | 86.01 | 1.73 | MultipleMeltPeaks |
| blaTEM                   | C1 | 37.47 | 83.98 | 1.78 |                   |
| blaTLA                   | C1 |       |       |      | NoAmplification   |
| blaVEB                   | C1 |       |       |      | NoAmplification   |
| blaVIM                   | C1 |       |       |      | NoAmplification   |
| blaZ                     | C1 |       |       |      | NoAmplification   |
| carB                     | C1 | 38.9  | 79.9  | 1.77 | MultipleMeltPeaks |
| catA1                    | C1 |       |       |      | NoAmplification   |
| catB3                    | C1 | 32.95 | 80.2  | 1.98 |                   |
| catB8                    | C1 | 29.15 | 81.59 | 1.95 |                   |

|            |    |       |       |      |                              |
|------------|----|-------|-------|------|------------------------------|
| ceoA       | C1 | 30.56 | 81.96 | 1.93 | MultipleMeltPeaks            |
| cepA       | C1 |       |       |      | NoAmplification              |
| cfiA       | C1 | 33.14 | 79.59 | 1.94 | MultipleMeltPeaks            |
| cfr        | C1 |       |       |      | NoAmplification              |
| cfxA       | C1 | 22.53 | 77.63 | 2.09 |                              |
| cmeA       | C1 |       |       |      | LowEfficiency, CtIsSmall, S: |
| cmlA1-01   | C1 | 37.82 | 88.66 | 1.8  | MultipleMeltPeaks            |
| cmlA1-02   | C1 | 37.59 | 62.16 | 1.93 | MultipleMeltPeaks            |
| cmr        | C1 |       |       |      | CurveFitFailed               |
| cmx(A)     | C1 | 28.58 | 84.47 | 1.96 | MultipleMeltPeaks            |
| cphA-01    | C1 | 29.64 | 86.58 | 1.92 |                              |
| cphA-02    | C1 | 34.52 | 83.4  | 1.92 |                              |
| dfrA1      | C1 | 35.37 | 85.67 | 1.83 |                              |
| dfrA12     | C1 | 36.74 | 61.42 | 1.74 | MultipleMeltPeaks            |
| emrD       | C1 | 29    | 90.64 | 1.87 |                              |
| ereA       | C1 | 30.87 | 83.44 | 1.96 |                              |
| ereB       | C1 | 38.98 | 78.99 | 1.69 |                              |
| erm(34)    | C1 |       |       |      | NoAmplification              |
| erm(35)    | C1 |       |       |      | NoAmplification              |
| erm(36)    | C1 | 29.73 | 80.9  | 1.98 | MultipleMeltPeaks            |
| ermA       | C1 |       |       |      | NoAmplification              |
| ermA/ermTR | C1 |       |       |      | NoAmplification              |
| ermB       | C1 |       |       |      | NoAmplification              |
| ermC       | C1 | 37.5  | 88.61 | 1.84 | MultipleMeltPeaks            |
| ermF       | C1 |       |       |      | NoAmplification              |
| ermJ/ermD  | C1 |       |       |      | NoAmplification              |
| ermK-01    | C1 | 37.58 | 80.08 | 1.9  | MultipleMeltPeaks            |
| ermK-02    | C1 | 35.53 | 85.53 | 1.73 |                              |
| ermT-01    | C1 |       |       |      | NoAmplification              |
| ermT-02    | C1 | 37.5  | 79.92 | 1.8  |                              |
| ermX       | C1 | 33.37 | 87.7  | 1.84 |                              |
| ermY       | C1 |       |       |      | NoAmplification              |
| fabK       | C1 | 23.25 | 79.17 | 2.14 |                              |
| floR       | C1 | 37.36 | 90.28 | 1.84 | MultipleMeltPeaks            |
| folA       | C1 |       |       |      | NoAmplification              |
| fosB       | C1 |       |       |      | LowEfficiency, CtIsSmall, S: |
| fosX       | C1 |       |       |      | NoAmplification              |
| fox5       | C1 | 27.6  | 86.56 | 1.97 |                              |
| imiR       | C1 |       |       |      | NoAmplification              |
| lmrA-01    | C1 |       |       |      | NoAmplification              |
| intl       | C1 | 31.76 | 84.51 | 1.93 |                              |
| intl1      | C1 | 21.55 | 87.34 | 2.01 |                              |
| IS613      | C1 | 26.91 | 79.57 | 2.03 |                              |
| lnuA-01    | C1 |       |       |      | NoAmplification              |
| lnuB-01    | C1 |       |       |      | NoAmplification              |
| lnuB-02    | C1 |       |       |      | NoAmplification              |

|               |    |       |       |      |                              |
|---------------|----|-------|-------|------|------------------------------|
| lnuC          | C1 |       |       |      | CurveFitFailed               |
| marR-01       | C1 | 31.46 | 89.01 | 1.93 | MultipleMeltPeaks            |
| matA/mel      | C1 | 21.53 | 77.67 | 2.04 |                              |
| mdetI1        | C1 |       |       |      | NoAmplification              |
| mdtA          | C1 | 37.39 | 81.98 | 1.93 |                              |
| mdtE/yhiU     | C1 | 33.68 | 85.99 | 1.81 |                              |
| mecA          | C1 |       |       |      | LowEfficiency, CtIsSmall, Ct |
| mefA          | C1 | 20.21 | 80.32 | 1.97 | MultipleMeltPeaks            |
| mepA          | C1 | 31    | 87.1  | 1.94 | MultipleMeltPeaks            |
| mexA          | C1 |       |       |      | NoAmplification              |
| mexD          | C1 | 33.71 | 86.07 | 2    |                              |
| mexE          | C1 | 35.47 | 88.3  | 1.84 |                              |
| mexF          | C1 | 26.37 | 89.67 | 2.03 |                              |
| mphA-01       | C1 | 28.26 | 88.85 | 2.01 |                              |
| mphA-02       | C1 | 30.52 | 86.68 | 2.09 |                              |
| mphB          | C1 | 32.99 | 82.79 | 1.97 |                              |
| mphC          | C1 | 35.29 | 76.12 | 1.89 | MultipleMeltPeaks            |
| msrA-01       | C1 |       |       |      | NoAmplification              |
| msrC-01       | C1 |       |       |      | NoAmplification              |
| mtrC-01       | C1 | 33.37 | 83.06 | 1.9  |                              |
| mtrC-02       | C1 | 33.06 | 83.74 | 1.95 |                              |
| mtrD-02       | C1 | 29.16 | 81.09 | 1.99 |                              |
| mtrD-03       | C1 | 29.02 | 84.15 | 1.92 | MultipleMeltPeaks            |
| NDM1          | C1 |       |       |      | LowEfficiency, CtIsSmall, S: |
| nimE          | C1 | 36.63 | 75.45 | 2.04 |                              |
| nisB          | C1 |       |       |      | NoAmplification              |
| oleC          | C1 | 37.8  | 61.83 | 1.86 | MultipleMeltPeaks            |
| oprD          | C1 | 28.29 | 87.99 | 1.95 |                              |
| oprJ          | C1 | 27.59 | 91.5  | 1.99 |                              |
| pbp           | C1 | 33.34 | 81.02 | 1.87 |                              |
| pbp2x         | C1 |       |       |      | NoAmplification              |
| Pbp5          | C1 |       |       |      | NoAmplification              |
| penA          | C1 | 36.62 | 86.55 | 1.73 | MultipleMeltPeaks            |
| pikR1         | C1 | 36.93 | 61.46 | 1.69 | BadR2, MultipleMeltPeaks     |
| pikR2         | C1 | 31.34 | 84.62 | 2.04 |                              |
| pmrA          | C1 | 24.5  | 79.41 | 2.12 |                              |
| pncA          | C1 | 29.63 | 89.67 | 1.9  |                              |
| putative mult | C1 | 31.43 | 84.79 | 1.96 |                              |
| qac           | C1 | 33.98 | 78.42 | 1.92 | MultipleMeltPeaks            |
| qacA          | C1 | 34.25 | 70.97 | 2    |                              |
| qacA/qacB     | C1 | 37.39 | 61.07 | 1.47 | MultipleMeltPeaks            |
| qacEdelta1-0  | C1 |       |       |      | NoAmplification              |
| qacEdelta1-0  | C1 | 37.48 | 78.08 | 1.84 | MultipleMeltPeaks            |
| qacH-01       | C1 | 28.05 | 88.39 | 1.88 |                              |
| qacH-02       | C1 | 38.74 | 83.59 | 1.58 | MultipleMeltPeaks            |
| qnrA          | C1 | 38.4  | 76.45 | 1.89 |                              |

|              |    |       |       |      |                              |
|--------------|----|-------|-------|------|------------------------------|
| rarD-02      | C1 | 38.21 | 82.92 | 1.82 | MultipleMeltPeaks            |
| sat4         | C1 |       |       |      | NoAmplification              |
| sdeB         | C1 |       |       |      | NoAmplification              |
| spcN-01      | C1 |       |       |      | NoAmplification              |
| speA         | C1 |       |       |      | NoAmplification              |
| str          | C1 |       |       |      | NoAmplification              |
| strA         | C1 |       |       |      | NoAmplification              |
| strB         | C1 | 37.69 | 85.36 | 1.75 | MultipleMeltPeaks            |
| sul1         | C1 | 32.7  | 88.56 | 1.84 |                              |
| sul2         | C1 |       |       |      | CurveFitFailed               |
| sulA/foIP-01 | C1 | 20.9  | 81.65 | 1.98 |                              |
| sulA/foIP-03 | C1 | 21.21 | 83.47 | 1.98 |                              |
| tet(32)      | C1 | 27.03 | 81.12 | 1.96 |                              |
| tet(34)      | C1 | 30.99 | 75.71 | 2    |                              |
| tet(35)      | C1 |       |       |      | NoAmplification              |
| tet(36)-A    | C1 | 38.43 | 61.85 | 2.4  | BadR2, MultipleMeltPeaks     |
| tet(36)-B    | C1 |       |       |      | NoAmplification              |
| tet(37)      | C1 | 23.82 | 76.5  | 2    |                              |
| tetA-01      | C1 | 30.05 | 85.06 | 1.93 |                              |
| tetA-02      | C1 | 37.75 | 89.08 | 1.76 | MultipleMeltPeaks            |
| tetB-01      | C1 | 29.12 | 86.01 | 1.98 |                              |
| tetB-02      | C1 | 40.05 | 76.37 | 1.71 |                              |
| tetC-01      | C1 |       |       |      | NoAmplification              |
| tetC-02      | C1 | 27.51 | 76.05 | 2.04 |                              |
| tetD-01      | C1 |       |       |      | NoAmplification              |
| tetD-02      | C1 | 37.9  | 75.76 | 1.8  |                              |
| tetE         | C1 |       |       |      | NoAmplification              |
| tetG-01      | C1 | 33.14 | 86.37 | 1.91 |                              |
| tetG-02      | C1 | 31.96 | 89.67 | 1.84 |                              |
| tetH         | C1 |       |       |      | NoAmplification              |
| tetJ         | C1 |       |       |      | NoAmplification              |
| tetK         | C1 |       |       |      | NoAmplification              |
| tetL-01      | C1 |       |       |      | CurveFitFailed               |
| tetL-02      | C1 | 35.51 | 85.29 | 1.75 |                              |
| tetM-01      | C1 | 23.92 | 76.09 | 2    |                              |
| tetM-02      | C1 | 24.75 | 77.62 | 2.05 |                              |
| tetO-01      | C1 | 25.03 | 76.88 | 2.04 |                              |
| tetPA        | C1 |       |       |      | NoAmplification              |
| tetPB-01     | C1 |       |       |      | NoAmplification              |
| tetPB-02     | C1 | 29.75 | 84.97 | 1.99 |                              |
| tetPB-03     | C1 |       |       |      | NoAmplification              |
| tetPB-05     | C1 |       |       |      | LowEfficiency, CtIsSmall, S: |
| tetQ         | C1 | 31.4  | 76.87 | 2.01 |                              |
| tetR-02      | C1 | 32.17 | 89.77 | 1.87 |                              |
| tetR-03      | C1 | 28.2  | 76    | 1.98 |                              |
| tetS         | C1 |       |       |      | NoAmplification              |

|             |    |       |       |      |                   |
|-------------|----|-------|-------|------|-------------------|
| tetT        | C1 |       |       |      | NoAmplification   |
| tetU-01     | C1 |       |       |      | NoAmplification   |
| tetV        | C1 |       |       |      | NoAmplification   |
| tetW-01     | C1 | 26.05 | 81.89 | 1.98 |                   |
| tetX        | C1 |       |       |      | NoAmplification   |
| tnpA-01     | C1 |       |       |      | NoAmplification   |
| tnpA-02     | C1 | 29.7  | 86.55 | 1.81 |                   |
| tnpA-03     | C1 | 28.53 | 77.59 | 2.09 |                   |
| tnpA-04     | C1 | 38.3  | 61.81 | 1.78 | MultipleMeltPeaks |
| tnpA-05     | C1 | 33.18 | 83.07 | 1.9  |                   |
| tnpA-07     | C1 | 38.45 | 75.99 | 1.77 | MultipleMeltPeaks |
| tolC-01     | C1 | 35.42 | 80.27 | 1.84 |                   |
| tolC-02     | C1 | 30.62 | 84.54 | 1.93 |                   |
| tolC-03     | C1 | 31.24 | 85.72 | 1.91 | MultipleMeltPeaks |
| Tp614       | C1 | 31.64 | 83.53 | 1.91 |                   |
| ttgA        | C1 | 39.75 | 81.52 | 1.82 |                   |
| ttgB        | C1 |       |       |      | CurveFitFailed    |
| vanA        | C1 |       |       |      | NoAmplification   |
| vanB-01     | C1 | 30.71 | 88.63 | 2.01 | MultipleMeltPeaks |
| vanC-01     | C1 |       |       |      | NoAmplification   |
| vanC-02     | C1 |       |       |      | NoAmplification   |
| vanC-03     | C1 | 32.51 | 91.5  | 1.91 | MultipleMeltPeaks |
| vanC1       | C1 |       |       |      | NoAmplification   |
| vanC2/vanC3 | C1 | 33.17 | 83.17 | 2.15 |                   |
| vanG        | C1 |       |       |      | NoAmplification   |
| vanHB       | C1 | 33.17 | 78.63 | 1.98 | MultipleMeltPeaks |
| vanHD       | C1 | 37.61 | 83.89 | 1.69 |                   |
| vanRA-01    | C1 |       |       |      | NoAmplification   |
| vanRA-02    | C1 |       |       |      | NoAmplification   |
| vanRB       | C1 | 39.3  | 87.59 | 1.72 | MultipleMeltPeaks |
| vanRC       | C1 |       |       |      | NoAmplification   |
| vanRC4      | C1 |       |       |      | NoAmplification   |
| vanRD       | C1 |       |       |      | NoAmplification   |
| vanSA       | C1 |       |       |      | NoAmplification   |
| vanSB       | C1 | 28.82 | 74.74 | 2.05 |                   |
| vanSC-01    | C1 | 35    | 84.01 | 1.92 |                   |
| vanSC-02    | C1 |       |       |      | NoAmplification   |
| vanTC-01    | C1 |       |       |      | NoAmplification   |
| vanTC-02    | C1 | 34.33 | 82.5  | 1.87 |                   |
| vanTE       | C1 |       |       |      | NoAmplification   |
| vanTG       | C1 | 38.53 | 73.9  | 1.86 |                   |
| vanWB       | C1 |       |       |      | NoAmplification   |
| vanWG       | C1 | 38.01 | 74.29 | 1.89 |                   |
| vanXA       | C1 | 35.3  | 74.71 | 1.93 |                   |
| vanXB       | C1 |       |       |      | NoAmplification   |
| vanXD       | C1 | 32.59 | 75.16 | 2.03 |                   |

|              |    |       |       |      |                              |
|--------------|----|-------|-------|------|------------------------------|
| vanYB        | C1 |       |       |      | NoAmplification              |
| vanYD-01     | C1 | 38.53 | 75.54 | 1.74 |                              |
| vanYD-02     | C1 |       |       |      | NoAmplification              |
| vatB-01      | C1 |       |       |      | NoAmplification              |
| vatB-02      | C1 | 39.13 | 74.84 | 1.77 | MultipleMeltPeaks            |
| vatC-01      | C1 | 35.92 | 73.84 | 1.88 |                              |
| vatC-02      | C1 | 42.93 | 61.92 | 1.72 | MultipleMeltPeaks            |
| vatE-01      | C1 | 28.99 | 77.12 | 2.14 |                              |
| vatE-02      | C1 |       |       |      | NoAmplification              |
| vgaA-01      | C1 |       |       |      | LowEfficiency, CtIsSmall, S: |
| vgaA-02      | C1 |       |       |      | CurveFitFailed               |
| vgb-01       | C1 | 31.5  | 87.43 | 1.94 |                              |
| vgbB-01      | C1 | 37.53 | 76.41 | 1.72 | MultipleMeltPeaks            |
| vgbB-02      | C1 |       |       |      | NoAmplification              |
| yceE/mdtG-0  | C1 |       |       |      | NoAmplification              |
| yceE/mdtG-0  | C1 | 37.41 | 81.09 | 1.83 |                              |
| yceL/mdtH-0  | C1 | 32.9  | 87.36 | 1.93 |                              |
| yceL/mdtH-0  | C1 |       |       |      | NoAmplification              |
| yceL/mdtH-0  | C1 |       |       |      | CurveFitFailed               |
| yidY/mdtL-01 | C1 | 32.28 | 86.87 | 1.94 | MultipleMeltPeaks            |
| yidY/mdtL-02 | C1 | 37.56 | 82.08 | 1.88 |                              |

| Assay          | Sample | Ct    | Tm    | Efficiency | Flags                       |
|----------------|--------|-------|-------|------------|-----------------------------|
| 16S rRNA       | C2     |       | 20.53 | 82         | 1.97                        |
| aac            | C2     |       |       |            | NoAmplification             |
| aac(6')-Ib(akz | C2     |       |       |            | NoAmplification             |
| aac(6')-Ib(akz | C2     |       |       |            | CurveFitFailed              |
| aac(6')-Ib(akz | C2     |       |       |            | NoAmplification             |
| aac(6')-II     | C2     |       |       |            | NoAmplification             |
| aac(6')I1      | C2     |       |       |            | NoAmplification             |
| aacA/aphD      | C2     |       |       |            | NoAmplification             |
| aacC           | C2     | 30.57 | 86.69 | 1.81       |                             |
| aacC1          | C2     |       |       |            | NoAmplification             |
| aacC2          | C2     |       |       |            | NoAmplification             |
| aacC4          | C2     | 30.77 | 88.33 | 1.8        |                             |
| aadA-01        | C2     |       |       |            | NoAmplification             |
| aadA-02        | C2     |       |       |            | NoAmplification             |
| aadA-1-01      | C2     |       |       |            | NoAmplification             |
| aadA-1-02      | C2     |       |       |            | NoAmplification             |
| aadA1          | C2     | 40.07 | 82.85 | 1.75       |                             |
| aadA2-01       | C2     |       |       |            | NoAmplification             |
| aadA2-02       | C2     | 35.34 | 74.7  | 1.95       |                             |
| aadA2-03       | C2     |       |       |            | NoAmplification             |
| aadA5-01       | C2     |       |       |            | NoAmplification             |
| aadA5-02       | C2     |       |       |            | NoAmplification             |
| aadA9-01       | C2     | 36.28 | 61.69 | 3.17       | HighEfficiency, SaturationB |
| aadA9-02       | C2     | 37.61 | 75.24 | 2.01       |                             |
| aadD           | C2     |       |       |            | NoAmplification             |
| aadE           | C2     |       |       |            | NoAmplification             |
| acrA-01        | C2     | 36.01 | 83.48 | 1.86       |                             |
| acrA-02        | C2     | 38.67 | 88.24 | 1.74       | MultipleMeltPeaks           |
| acrA-03        | C2     |       |       |            | NoAmplification             |
| acrA-04        | C2     | 32.2  | 80.51 | 1.95       |                             |
| acrA-05        | C2     |       |       |            | CurveFitFailed              |
| acrB-01        | C2     | 37.62 | 75.29 | 1.96       |                             |
| acrF           | C2     | 36.86 | 82.66 | 2.6        | MultipleMeltPeaks           |
| acrR-01        | C2     |       |       |            | NoAmplification             |
| acrR-02        | C2     |       |       |            | NoAmplification             |
| Actin          | C2     | 28.5  | 87    | 1.89       |                             |
| adeA           | C2     |       |       |            | NoAmplification             |
| ampC-01        | C2     | 32.05 | 87.59 | 1.93       | MultipleMeltPeaks           |
| ampC-02        | C2     |       |       |            | CurveFitFailed              |
| ampC-04        | C2     | 35.45 | 85.93 | 1.98       |                             |
| ampC-05        | C2     |       |       |            | NoAmplification             |
| ampC-06        | C2     |       |       |            | NoAmplification             |
| ampC-07        | C2     |       |       |            | NoAmplification             |
| ampC-09        | C2     |       |       |            | NoAmplification             |
| ampC/blaDH     | C2     |       |       |            | NoAmplification             |

|                            |    |       |       |      |                   |
|----------------------------|----|-------|-------|------|-------------------|
| aph                        | C2 |       |       |      | NoAmplification   |
| aph(2')-Id-01              | C2 |       |       |      | NoAmplification   |
| aph(2')-Id-02              | C2 |       |       |      | NoAmplification   |
| aph6ia                     | C2 |       |       |      | NoAmplification   |
| aphA1(aka k <sub>z</sub> ) | C2 |       |       |      | NoAmplification   |
| bacA-01                    | C2 |       |       |      | NoAmplification   |
| bacA-02                    | C2 | 32.43 | 83.28 | 1.82 |                   |
| BETA-globin                | C2 | 29.76 | 83.86 | 1.96 |                   |
| bla-ACC-1                  | C2 |       |       |      | NoAmplification   |
| bla-L1                     | C2 |       |       |      | NoAmplification   |
| bla1                       | C2 |       |       |      | NoAmplification   |
| blaCMY                     | C2 |       |       |      | NoAmplification   |
| blaCMY2-01                 | C2 |       |       |      | NoAmplification   |
| blaCMY2-02                 | C2 | 36.38 | 82.46 | 1.73 | MultipleMeltPeaks |
| blaCTX-M-01                | C2 | 31.93 | 86.74 | 1.95 |                   |
| blaCTX-M-02                | C2 |       |       |      | NoAmplification   |
| blaCTX-M-03                | C2 |       |       |      | NoAmplification   |
| blaCTX-M-04                | C2 | 30.48 | 87.73 | 1.92 |                   |
| blaCTX-M-05                | C2 | 31.35 | 76.38 | 1.78 |                   |
| blaCTX-M-06                | C2 |       |       |      | NoAmplification   |
| blaGES                     | C2 |       |       |      | NoAmplification   |
| blaIMP-01                  | C2 |       |       |      | NoAmplification   |
| blaIMP-02                  | C2 |       |       |      | NoAmplification   |
| blaMOX/blaC                | C2 |       |       |      | NoAmplification   |
| blaOCH                     | C2 |       |       |      | NoAmplification   |
| blaOKP                     | C2 |       |       |      | NoAmplification   |
| blaOXA1/blaC               | C2 |       |       |      | NoAmplification   |
| blaOXA10-01                | C2 |       |       |      | NoAmplification   |
| blaOXA10-02                | C2 |       |       |      | NoAmplification   |
| blaOXY                     | C2 | 37.75 | 88.35 | 1.73 |                   |
| blaPAO                     | C2 |       |       |      | NoAmplification   |
| blaPER                     | C2 | 38.53 | 69.66 | 1.66 |                   |
| blaPSE                     | C2 |       |       |      | NoAmplification   |
| blaROB                     | C2 |       |       |      | NoAmplification   |
| blaSFO                     | C2 | 38.89 | 76.99 | 1.72 |                   |
| blaSHV-01                  | C2 | 35.67 | 88.82 | 1.74 |                   |
| blaSHV-02                  | C2 |       |       |      | NoAmplification   |
| blaTEM                     | C2 | 27.97 | 79.08 | 2.04 |                   |
| blaTLA                     | C2 |       |       |      | NoAmplification   |
| blaVEB                     | C2 |       |       |      | NoAmplification   |
| blaVIM                     | C2 |       |       |      | NoAmplification   |
| blaZ                       | C2 |       |       |      | NoAmplification   |
| carB                       | C2 |       |       |      | NoAmplification   |
| catA1                      | C2 |       |       |      | NoAmplification   |
| catB3                      | C2 |       |       |      | NoAmplification   |
| catB8                      | C2 | 33.42 | 79.53 | 1.89 | MultipleMeltPeaks |



|            |    |       |       |      |                              |
|------------|----|-------|-------|------|------------------------------|
| ceoA       | C2 |       |       |      | NoAmplification              |
| cepA       | C2 |       |       |      | NoAmplification              |
| cfiA       | C2 |       |       |      | NoAmplification              |
| cfr        | C2 |       |       |      | NoAmplification              |
| cfxA       | C2 | 25.4  | 77.26 | 2.02 |                              |
| cmeA       | C2 |       |       |      | NoAmplification              |
| cmlA1-01   | C2 |       |       |      | NoAmplification              |
| cmlA1-02   | C2 |       |       |      | NoAmplification              |
| cmr        | C2 |       |       |      | NoAmplification              |
| cmx(A)     | C2 | 35.79 | 75.14 | 1.87 | MultipleMeltPeaks            |
| cphA-01    | C2 |       |       |      | NoAmplification              |
| cphA-02    | C2 | 35.93 | 82.35 | 1.8  |                              |
| dfrA1      | C2 |       |       |      | NoAmplification              |
| dfrA12     | C2 |       |       |      | NoAmplification              |
| emrD       | C2 | 35.74 | 90.38 | 1.77 |                              |
| ereA       | C2 |       |       |      | NoAmplification              |
| ereB       | C2 |       |       |      | NoAmplification              |
| erm(34)    | C2 |       |       |      | NoAmplification              |
| erm(35)    | C2 |       |       |      | NoAmplification              |
| erm(36)    | C2 | 33.75 | 81.43 | 1.92 |                              |
| ermA       | C2 |       |       |      | NoAmplification              |
| ermA/ermTR | C2 |       |       |      | NoAmplification              |
| ermB       | C2 | 27.23 | 74.89 | 2.01 |                              |
| ermC       | C2 |       |       |      | NoAmplification              |
| ermF       | C2 |       |       |      | NoAmplification              |
| ermJ/ermD  | C2 |       |       |      | NoAmplification              |
| ermK-01    | C2 |       |       |      | NoAmplification              |
| ermK-02    | C2 |       |       |      | NoAmplification              |
| ermT-01    | C2 |       |       |      | NoAmplification              |
| ermT-02    | C2 |       |       |      | NoAmplification              |
| ermX       | C2 |       |       |      | NoAmplification              |
| ermY       | C2 |       |       |      | NoAmplification              |
| fabK       | C2 | 27.68 | 79.81 | 2.07 |                              |
| floR       | C2 |       |       |      | NoAmplification              |
| folA       | C2 |       |       |      | NoAmplification              |
| fosB       | C2 |       |       |      | LowEfficiency, CtIsSmall, S: |
| fosX       | C2 |       |       |      | NoAmplification              |
| fox5       | C2 | 36.62 | 78.43 | 1.79 | MultipleMeltPeaks            |
| imiR       | C2 |       |       |      | LowEfficiency, CurveFitFail  |
| ImrA-01    | C2 |       |       |      | NoAmplification              |
| intl       | C2 |       |       |      | NoAmplification              |
| intl1      | C2 | 24.56 | 86.76 | 2.01 |                              |
| IS613      | C2 | 27.07 | 79.4  | 2.04 |                              |
| lnuA-01    | C2 |       |       |      | NoAmplification              |
| lnuB-01    | C2 |       |       |      | NoAmplification              |
| lnuB-02    | C2 |       |       |      | NoAmplification              |

|               |    |       |       |      |                   |
|---------------|----|-------|-------|------|-------------------|
| lnuC          | C2 |       |       |      | NoAmplification   |
| marR-01       | C2 |       |       |      | NoAmplification   |
| matA/mel      | C2 | 24.1  | 77.48 | 2.02 |                   |
| mdet1         | C2 |       |       |      | NoAmplification   |
| mdtA          | C2 |       |       |      | NoAmplification   |
| mdtE/yhiU     | C2 | 36.86 | 85.15 | 1.66 |                   |
| mecA          | C2 |       |       |      | NoAmplification   |
| mefA          | C2 | 23.34 | 80.69 | 1.95 |                   |
| mepA          | C2 | 35.15 | 81.17 | 1.88 |                   |
| mexA          | C2 | 40.9  | 61.98 | 1.63 | MultipleMeltPeaks |
| mexD          | C2 |       |       |      | NoAmplification   |
| mexE          | C2 |       |       |      | NoAmplification   |
| mexF          | C2 | 30.89 | 87.47 | 1.99 |                   |
| mphA-01       | C2 | 31.42 | 88.8  | 1.94 |                   |
| mphA-02       | C2 | 35.94 | 78.76 | 1.87 |                   |
| mphB          | C2 | 35.69 | 88.58 | 1.86 |                   |
| mphC          | C2 |       |       |      | NoAmplification   |
| msrA-01       | C2 |       |       |      | NoAmplification   |
| msrC-01       | C2 |       |       |      | NoAmplification   |
| mtrC-01       | C2 |       |       |      | NoAmplification   |
| mtrC-02       | C2 | 35.67 | 81.18 | 1.89 | MultipleMeltPeaks |
| mtrD-02       | C2 | 30.32 | 88.7  | 1.93 | MultipleMeltPeaks |
| mtrD-03       | C2 | 33.56 | 81.07 | 1.84 |                   |
| NDM1          | C2 |       |       |      | NoAmplification   |
| nimE          | C2 | 37.6  | 74.77 | 1.91 |                   |
| nisB          | C2 |       |       |      | NoAmplification   |
| oleC          | C2 |       |       |      | NoAmplification   |
| oprD          | C2 | 37.07 | 73.52 | 1.76 | MultipleMeltPeaks |
| oprJ          | C2 | 31.46 | 88.36 | 1.9  |                   |
| pbp           | C2 |       |       |      | NoAmplification   |
| pbp2x         | C2 |       |       |      | NoAmplification   |
| Pbp5          | C2 |       |       |      | NoAmplification   |
| penA          | C2 |       |       |      | NoAmplification   |
| pikR1         | C2 |       |       |      | NoAmplification   |
| pikR2         | C2 | 39.83 | 91.1  | 1.65 | MultipleMeltPeaks |
| pmrA          | C2 | 27.86 | 78.82 | 2.06 |                   |
| pncA          | C2 | 28.24 | 89.51 | 1.91 | MultipleMeltPeaks |
| putative mulI | C2 |       |       |      | NoAmplification   |
| qac           | C2 |       |       |      | NoAmplification   |
| qacA          | C2 | 32.16 | 70.51 | 1.87 |                   |
| qacA/qacB     | C2 |       |       |      | NoAmplification   |
| qacEdelta1-0  | C2 |       |       |      | NoAmplification   |
| qacEdelta1-0  | C2 | 34.54 | 83.25 | 1.88 |                   |
| qacH-01       | C2 | 35.43 | 88.34 | 1.81 |                   |
| qacH-02       | C2 |       |       |      | NoAmplification   |
| qnrA          | C2 |       |       |      | NoAmplification   |

|              |    |       |       |      |                   |
|--------------|----|-------|-------|------|-------------------|
| rarD-02      | C2 |       |       |      | NoAmplification   |
| sat4         | C2 |       |       |      | NoAmplification   |
| sdeB         | C2 |       |       |      | NoAmplification   |
| spcN-01      | C2 |       |       |      | NoAmplification   |
| speA         | C2 |       |       |      | NoAmplification   |
| str          | C2 |       |       |      | NoAmplification   |
| strA         | C2 |       |       |      | NoAmplification   |
| strB         | C2 |       |       |      | NoAmplification   |
| sul1         | C2 |       |       |      | NoAmplification   |
| sul2         | C2 |       |       |      | NoAmplification   |
| sulA/foIP-01 | C2 | 24.84 | 81.27 | 1.96 |                   |
| sulA/foIP-03 | C2 | 25.3  | 83.82 | 1.95 |                   |
| tet(32)      | C2 |       |       |      | NoAmplification   |
| tet(34)      | C2 | 30.92 | 75.53 | 2    |                   |
| tet(35)      | C2 |       |       |      | NoAmplification   |
| tet(36)-A    | C2 |       |       |      | NoAmplification   |
| tet(36)-B    | C2 |       |       |      | NoAmplification   |
| tet(37)      | C2 |       |       |      | NoAmplification   |
| tetA-01      | C2 |       |       |      | NoAmplification   |
| tetA-02      | C2 |       |       |      | NoAmplification   |
| tetB-01      | C2 | 38.61 | 82.02 | 1.71 | MultipleMeltPeaks |
| tetB-02      | C2 |       |       |      | NoAmplification   |
| tetC-01      | C2 |       |       |      | NoAmplification   |
| tetC-02      | C2 |       |       |      | NoAmplification   |
| tetD-01      | C2 |       |       |      | NoAmplification   |
| tetD-02      | C2 | 34.31 | 76.44 | 2.07 |                   |
| tetE         | C2 |       |       |      | NoAmplification   |
| tetG-01      | C2 |       |       |      | NoAmplification   |
| tetG-02      | C2 | 34.63 | 87    | 1.83 |                   |
| tetH         | C2 |       |       |      | NoAmplification   |
| tetJ         | C2 |       |       |      | NoAmplification   |
| tetK         | C2 |       |       |      | NoAmplification   |
| tetL-01      | C2 |       |       |      | NoAmplification   |
| tetL-02      | C2 | 38.53 | 85.18 | 1.69 |                   |
| tetM-01      | C2 | 25.36 | 76    | 1.99 |                   |
| tetM-02      | C2 | 26.99 | 77.45 | 1.97 |                   |
| tetO-01      | C2 |       |       |      | NoAmplification   |
| tetPA        | C2 |       |       |      | NoAmplification   |
| tetPB-01     | C2 |       |       |      | NoAmplification   |
| tetPB-02     | C2 |       |       |      | CurveFitFailed    |
| tetPB-03     | C2 |       |       |      | NoAmplification   |
| tetPB-05     | C2 |       |       |      | NoAmplification   |
| tetQ         | C2 | 26.33 | 75.71 | 1.98 |                   |
| tetR-02      | C2 | 31.48 | 83.24 | 1.8  |                   |
| tetR-03      | C2 |       |       |      | NoAmplification   |
| tetS         | C2 |       |       |      | NoAmplification   |

|             |    |       |       |                 |
|-------------|----|-------|-------|-----------------|
| tetT        | C2 |       |       | NoAmplification |
| tetU-01     | C2 |       |       | NoAmplification |
| tetV        | C2 |       |       | NoAmplification |
| tetW-01     | C2 |       |       | NoAmplification |
| tetX        | C2 |       |       | NoAmplification |
| tnpA-01     | C2 |       |       | NoAmplification |
| tnpA-02     | C2 |       |       | NoAmplification |
| tnpA-03     | C2 | 28.85 | 77.49 | 2.08            |
| tnpA-04     | C2 |       |       | NoAmplification |
| tnpA-05     | C2 |       |       | NoAmplification |
| tnpA-07     | C2 |       |       | NoAmplification |
| tolC-01     | C2 |       |       | NoAmplification |
| tolC-02     | C2 | 37.2  | 83.52 | 1.77            |
| tolC-03     | C2 | 36.43 | 87.49 | 1.87            |
| Tp614       | C2 |       |       | NoAmplification |
| ttgA        | C2 |       |       | NoAmplification |
| ttgB        | C2 |       |       | NoAmplification |
| vanA        | C2 |       |       | NoAmplification |
| vanB-01     | C2 | 36.44 | 80.72 | 1.9             |
| vanC-01     | C2 |       |       | NoAmplification |
| vanC-02     | C2 |       |       | NoAmplification |
| vanC-03     | C2 | 30.34 | 77.5  | 1.95            |
| vanC1       | C2 |       |       | NoAmplification |
| vanC2/vanC3 | C2 | 33.64 | 77.02 | 2.17            |
| vanG        | C2 |       |       | NoAmplification |
| vanHB       | C2 | 35.93 | 85.49 | 1.76            |
| vanHD       | C2 |       |       | NoAmplification |
| vanRA-01    | C2 |       |       | NoAmplification |
| vanRA-02    | C2 |       |       | NoAmplification |
| vanRB       | C2 |       |       | NoAmplification |
| vanRC       | C2 |       |       | NoAmplification |
| vanRC4      | C2 |       |       | NoAmplification |
| vanRD       | C2 |       |       | NoAmplification |
| vanSA       | C2 |       |       | NoAmplification |
| vanSB       | C2 | 30.28 | 74.32 | 2.06            |
| vanSC-01    | C2 |       |       | NoAmplification |
| vanSC-02    | C2 | 33.67 | 75.59 | 1.99            |
| vanTC-01    | C2 |       |       | NoAmplification |
| vanTC-02    | C2 |       |       | NoAmplification |
| vanTE       | C2 |       |       | NoAmplification |
| vanTG       | C2 | 39.73 | 73.22 | 1.82            |
| vanWB       | C2 |       |       | NoAmplification |
| vanWG       | C2 |       |       | CurveFitFailed  |
| vanXA       | C2 | 39.53 | 72.88 | 1.65            |
| vanXB       | C2 |       |       | NoAmplification |
| vanXD       | C2 | 30.04 | 75.75 | 1.99            |

|              |    |       |       |      |                   |
|--------------|----|-------|-------|------|-------------------|
| vanYB        | C2 |       |       |      | NoAmplification   |
| vanYD-01     | C2 | 36.31 | 88.67 | 1.8  | MultipleMeltPeaks |
| vanYD-02     | C2 |       |       |      | NoAmplification   |
| vatB-01      | C2 |       |       |      | NoAmplification   |
| vatB-02      | C2 |       |       |      | NoAmplification   |
| vatC-01      | C2 |       |       |      | NoAmplification   |
| vatC-02      | C2 |       |       |      | NoAmplification   |
| vatE-01      | C2 | 28.58 | 77.08 | 2.11 |                   |
| vatE-02      | C2 | 34.79 | 76.12 | 2.12 |                   |
| vgaA-01      | C2 |       |       |      | NoAmplification   |
| vgaA-02      | C2 |       |       |      | NoAmplification   |
| vgb-01       | C2 | 39.72 | 82.82 | 1.72 |                   |
| vgbB-01      | C2 |       |       |      | NoAmplification   |
| vgbB-02      | C2 |       |       |      | NoAmplification   |
| yceE/mdtG-0  | C2 |       |       |      | NoAmplification   |
| yceE/mdtG-0  | C2 |       |       |      | NoAmplification   |
| yceL/mdtH-0  | C2 |       |       |      | NoAmplification   |
| yceL/mdtH-0  | C2 |       |       |      | NoAmplification   |
| yceL/mdtH-0  | C2 |       |       |      | NoAmplification   |
| yidY/mdtL-01 | C2 |       |       |      | CurveFitFailed    |
| yidY/mdtL-02 | C2 |       |       |      | NoAmplification   |

| Assay          | Sample | Ct | Tm    | Efficiency | Flags                  |
|----------------|--------|----|-------|------------|------------------------|
| 16S rRNA       | C3     |    | 24.37 | 81.99      | 1.99                   |
| aac            | C3     |    | 33.16 | 90.39      | 1.59                   |
| aac(6')-Ib(akz | C3     |    |       |            | NoAmplification        |
| aac(6')-Ib(akz | C3     |    | 30.6  | 79.37      | 1.97 MultipleMeltPeaks |
| aac(6')-Ib(akz | C3     |    |       |            | NoAmplification        |
| aac(6')-II     | C3     |    | 37.25 | 81.42      | 1.63 MultipleMeltPeaks |
| aac(6')I1      | C3     |    |       |            | NoAmplification        |
| aacA/aphD      | C3     |    |       |            | NoAmplification        |
| aacC           | C3     |    | 31.98 | 92.32      | 1.81 MultipleMeltPeaks |
| aacC1          | C3     |    |       |            | NoAmplification        |
| aacC2          | C3     |    |       |            | NoAmplification        |
| aacC4          | C3     |    | 35.72 | 83.76      | 1.91 MultipleMeltPeaks |
| aadA-01        | C3     |    |       |            | NoAmplification        |
| aadA-02        | C3     |    | 39.72 | 80.82      | 1.76 MultipleMeltPeaks |
| aadA-1-01      | C3     |    |       |            | NoAmplification        |
| aadA-1-02      | C3     |    |       |            | NoAmplification        |
| aadA1          | C3     |    | 35.14 | 83.23      | 1.93 MultipleMeltPeaks |
| aadA2-01       | C3     |    |       |            | NoAmplification        |
| aadA2-02       | C3     |    | 32.91 | 75.53      | 2.08                   |
| aadA2-03       | C3     |    |       |            | NoAmplification        |
| aadA5-01       | C3     |    | 37.23 | 78.99      | 1.77 MultipleMeltPeaks |
| aadA5-02       | C3     |    | 35.47 | 83.26      | 1.9                    |
| aadA9-01       | C3     |    | 37.2  | 62.22      | 2.18 MultipleMeltPeaks |
| aadA9-02       | C3     |    |       |            | NoAmplification        |
| aadD           | C3     |    |       |            | NoAmplification        |
| aadE           | C3     |    | 34.07 | 71.98      | 2.08                   |
| acrA-01        | C3     |    | 31.91 | 88.81      | 1.95                   |
| acrA-02        | C3     |    |       |            | NoAmplification        |
| acrA-03        | C3     |    |       |            | NoAmplification        |
| acrA-04        | C3     |    | 30.07 | 82.47      | 1.97                   |
| acrA-05        | C3     |    | 32.8  | 81.91      | 1.89                   |
| acrB-01        | C3     |    |       |            | NoAmplification        |
| acrF           | C3     |    | 28.23 | 83.04      | 1.86                   |
| acrR-01        | C3     |    | 32.47 | 81.22      | 1.94                   |
| acrR-02        | C3     |    |       |            | CurveFitFailed         |
| Actin          | C3     |    | 23.1  | 87.15      | 1.94                   |
| adeA           | C3     |    |       |            | NoAmplification        |
| ampC-01        | C3     |    | 34.42 | 84.79      | 1.91                   |
| ampC-02        | C3     |    |       |            | NoAmplification        |
| ampC-04        | C3     |    | 35.49 | 77.69      | 2.04                   |
| ampC-05        | C3     |    |       |            | NoAmplification        |
| ampC-06        | C3     |    |       |            | CurveFitFailed         |
| ampC-07        | C3     |    | 36.78 | 82.64      | 1.8 MultipleMeltPeaks  |
| ampC-09        | C3     |    |       |            | NoAmplification        |
| ampC/blaDH     | C3     |    | 31.91 | 77.56      | 1.92                   |

|                          |    |       |       |      |                   |
|--------------------------|----|-------|-------|------|-------------------|
| aph                      | C3 |       |       |      | NoAmplification   |
| aph(2')-Id-01            | C3 |       |       |      | NoAmplification   |
| aph(2')-Id-02            | C3 |       |       |      | NoAmplification   |
| aph6ia                   | C3 | 38.03 | 79.57 | 1.84 |                   |
| aphA1(aka k <sub>z</sub> | C3 |       |       |      | NoAmplification   |
| bacA-01                  | C3 |       |       |      | NoAmplification   |
| bacA-02                  | C3 | 38.21 | 83.56 | 1.73 | MultipleMeltPeaks |
| BETA-globin              | C3 | 24.93 | 84.07 | 2.02 |                   |
| bla-ACC-1                | C3 | 36.37 | 81.03 | 1.79 | MultipleMeltPeaks |
| bla-L1                   | C3 | 32.96 | 81.84 | 1.96 | MultipleMeltPeaks |
| bla1                     | C3 |       |       |      | NoAmplification   |
| blaCMY                   | C3 |       |       |      | NoAmplification   |
| blaCMY2-01               | C3 |       |       |      | NoAmplification   |
| blaCMY2-02               | C3 | 29.71 | 85.66 | 2    | MultipleMeltPeaks |
| blaCTX-M-01              | C3 |       |       |      | NoAmplification   |
| blaCTX-M-02              | C3 | 36.13 | 80.14 | 1.77 |                   |
| blaCTX-M-03              | C3 |       |       |      | NoAmplification   |
| blaCTX-M-04              | C3 | 38.91 | 62.41 | 1.74 | MultipleMeltPeaks |
| blaCTX-M-05              | C3 | 30.72 | 76.91 | 1.78 |                   |
| blaCTX-M-06              | C3 |       |       |      | NoAmplification   |
| blaGES                   | C3 |       |       |      | NoAmplification   |
| blaIMP-01                | C3 |       |       |      | NoAmplification   |
| blaIMP-02                | C3 |       |       |      | NoAmplification   |
| blaMOX/blaC              | C3 | 35.21 | 88.22 | 1.88 | MultipleMeltPeaks |
| blaOCH                   | C3 |       |       |      | NoAmplification   |
| blaOKP                   | C3 |       |       |      | NoAmplification   |
| blaOXA1/blaC             | C3 |       |       |      | NoAmplification   |
| blaOXA10-01              | C3 |       |       |      | NoAmplification   |
| blaOXA10-02              | C3 |       |       |      | NoAmplification   |
| blaOXY                   | C3 | 38.81 | 67.45 | 1.56 | MultipleMeltPeaks |
| blaPAO                   | C3 |       |       |      | NoAmplification   |
| blaPER                   | C3 |       |       |      | NoAmplification   |
| blaPSE                   | C3 |       |       |      | NoAmplification   |
| blaROB                   | C3 |       |       |      | NoAmplification   |
| blaSFO                   | C3 | 31.08 | 82.36 | 1.93 | MultipleMeltPeaks |
| blaSHV-01                | C3 | 38.31 | 64.81 | 1.61 | MultipleMeltPeaks |
| blaSHV-02                | C3 |       |       |      | NoAmplification   |
| blaTEM                   | C3 |       |       |      | NoAmplification   |
| blaTLA                   | C3 |       |       |      | NoAmplification   |
| blaVEB                   | C3 |       |       |      | NoAmplification   |
| blaVIM                   | C3 |       |       |      | NoAmplification   |
| blaZ                     | C3 |       |       |      | NoAmplification   |
| carB                     | C3 |       |       |      | NoAmplification   |
| catA1                    | C3 |       |       |      | NoAmplification   |
| catB3                    | C3 |       |       |      | NoAmplification   |
| catB8                    | C3 | 29.17 | 82.03 | 1.95 |                   |

|            |    |       |       |      |                              |
|------------|----|-------|-------|------|------------------------------|
| ceoA       | C3 | 28.96 | 82.36 | 1.95 |                              |
| cepA       | C3 |       |       |      | NoAmplification              |
| cfiA       | C3 | 32.19 | 84.64 | 1.91 |                              |
| cfr        | C3 |       |       |      | NoAmplification              |
| cfxA       | C3 | 38.46 | 73.6  | 1.96 |                              |
| cmeA       | C3 | 38.44 | 85.01 | 1.8  | MultipleMeltPeaks            |
| cmlA1-01   | C3 |       |       |      | NoAmplification              |
| cmlA1-02   | C3 | 36.44 | 88.35 | 1.88 |                              |
| cmr        | C3 |       |       |      | NoAmplification              |
| cmx(A)     | C3 | 27.91 | 84.56 | 1.94 |                              |
| cphA-01    | C3 | 30.72 | 88.81 | 1.92 |                              |
| cphA-02    | C3 | 30    | 78.32 | 1.98 | MultipleMeltPeaks            |
| dfrA1      | C3 | 37.94 | 78.64 | 1.89 |                              |
| dfrA12     | C3 |       |       |      | NoAmplification              |
| emrD       | C3 |       |       |      | NoAmplification              |
| ereA       | C3 | 38.78 | 82.81 | 1.82 | MultipleMeltPeaks            |
| ereB       | C3 |       |       |      | CurveFitFailed               |
| erm(34)    | C3 |       |       |      | NoAmplification              |
| erm(35)    | C3 |       |       |      | NoAmplification              |
| erm(36)    | C3 | 35.6  | 85.93 | 1.81 |                              |
| ermA       | C3 |       |       |      | NoAmplification              |
| ermA/ermTR | C3 |       |       |      | NoAmplification              |
| ermB       | C3 |       |       |      | NoAmplification              |
| ermC       | C3 |       |       |      | NoAmplification              |
| ermF       | C3 |       |       |      | NoAmplification              |
| ermJ/ermD  | C3 |       |       |      | NoAmplification              |
| ermK-01    | C3 | 40.39 | 79.06 | 1.78 |                              |
| ermK-02    | C3 |       |       |      | CurveFitFailed               |
| ermT-01    | C3 |       |       |      | NoAmplification              |
| ermT-02    | C3 | 35.04 | 74.72 | 1.99 |                              |
| ermX       | C3 | 37.25 | 87.02 | 1.71 |                              |
| ermY       | C3 |       |       |      | NoAmplification              |
| fabK       | C3 | 27.89 | 79.51 | 2.01 |                              |
| floR       | C3 |       |       |      | NoAmplification              |
| folA       | C3 | 35.79 | 76.7  | 1.91 |                              |
| fosB       | C3 |       |       |      | LowEfficiency, CtIsSmall, S: |
| fosX       | C3 |       |       |      | NoAmplification              |
| fox5       | C3 | 27.97 | 87.22 | 1.98 | MultipleMeltPeaks            |
| imiR       | C3 | 37.42 | 74.52 | 1.82 |                              |
| ImrA-01    | C3 |       |       |      | NoAmplification              |
| intl       | C3 | 33.53 | 84.68 | 1.94 |                              |
| intl1      | C3 | 23.01 | 87.21 | 1.98 |                              |
| IS613      | C3 |       |       |      | NoAmplification              |
| lnuA-01    | C3 |       |       |      | NoAmplification              |
| lnuB-01    | C3 |       |       |      | NoAmplification              |
| lnuB-02    | C3 |       |       |      | NoAmplification              |



|                |    |       |       |      |                   |
|----------------|----|-------|-------|------|-------------------|
| lnuC           | C3 |       |       |      | NoAmplification   |
| marR-01        | C3 |       |       |      | NoAmplification   |
| matA/mel       | C3 | 35.27 | 82.28 | 1.99 |                   |
| mdet1          | C3 |       |       |      | NoAmplification   |
| mdtA           | C3 |       |       |      | NoAmplification   |
| mdtE/yhiU      | C3 |       |       |      | NoAmplification   |
| mecA           | C3 |       |       |      | NoAmplification   |
| mefA           | C3 | 27.54 | 80.64 | 1.94 |                   |
| mepA           | C3 | 34.13 | 78.86 | 1.93 |                   |
| mexA           | C3 |       |       |      | NoAmplification   |
| mexD           | C3 | 32.34 | 79.07 | 2.04 |                   |
| mexE           | C3 | 34.79 | 87.15 | 1.87 |                   |
| mexF           | C3 | 30.67 | 87.5  | 2.01 |                   |
| mphA-01        | C3 | 34.32 | 86.75 | 1.94 |                   |
| mphA-02        | C3 | 31.1  | 86.75 | 1.8  | MultipleMeltPeaks |
| mphB           | C3 | 38.74 | 79.42 | 1.78 | MultipleMeltPeaks |
| mphC           | C3 |       |       |      | NoAmplification   |
| msrA-01        | C3 |       |       |      | NoAmplification   |
| msrC-01        | C3 |       |       |      | NoAmplification   |
| mtrC-01        | C3 | 39    | 62.46 | 1.74 | MultipleMeltPeaks |
| mtrC-02        | C3 | 33.18 | 74.78 | 1.98 |                   |
| mtrD-02        | C3 | 29.18 | 82.56 | 1.99 |                   |
| mtrD-03        | C3 | 37.98 | 75.58 | 1.85 | MultipleMeltPeaks |
| NDM1           | C3 |       |       |      | NoAmplification   |
| nimE           | C3 | 32.37 | 76.35 | 1.98 |                   |
| nisB           | C3 |       |       |      | NoAmplification   |
| oleC           | C3 |       |       |      | NoAmplification   |
| oprD           | C3 | 30.93 | 81.27 | 1.98 |                   |
| oprJ           | C3 |       |       |      | NoAmplification   |
| pbp            | C3 |       |       |      | NoAmplification   |
| pbp2x          | C3 |       |       |      | NoAmplification   |
| Pbp5           | C3 |       |       |      | NoAmplification   |
| penA           | C3 |       |       |      | NoAmplification   |
| pikR1          | C3 |       |       |      | NoAmplification   |
| pikR2          | C3 | 31.23 | 84.78 | 2.03 |                   |
| pmrA           | C3 |       |       |      | NoAmplification   |
| pncA           | C3 | 34.07 | 86.25 | 1.9  |                   |
| putative multi | C3 | 32.31 | 84.19 | 1.99 |                   |
| qac            | C3 |       |       |      | CurveFitFailed    |
| qacA           | C3 |       |       |      | NoAmplification   |
| qacA/qacB      | C3 |       |       |      | NoAmplification   |
| qacEdelta1-0   | C3 |       |       |      | NoAmplification   |
| qacEdelta1-0   | C3 | 29.5  | 77.16 | 2    |                   |
| qacH-01        | C3 | 38.07 | 82.09 | 1.73 | MultipleMeltPeaks |
| qacH-02        | C3 | 36.48 | 82.71 | 1.74 |                   |
| qnrA           | C3 | 35.34 | 73.87 | 2.05 |                   |

|              |    |       |       |      |                   |
|--------------|----|-------|-------|------|-------------------|
| rarD-02      | C3 |       |       |      | NoAmplification   |
| sat4         | C3 |       |       |      | NoAmplification   |
| sdeB         | C3 |       |       |      | NoAmplification   |
| spcN-01      | C3 |       |       |      | NoAmplification   |
| speA         | C3 |       |       |      | NoAmplification   |
| str          | C3 |       |       |      | NoAmplification   |
| strA         | C3 |       |       |      | CurveFitFailed    |
| strB         | C3 |       |       |      | NoAmplification   |
| sul1         | C3 | 36.62 | 89.76 | 1.69 | MultipleMeltPeaks |
| sul2         | C3 |       |       |      | NoAmplification   |
| sulA/foIP-01 | C3 | 29.74 | 81.31 | 1.96 |                   |
| sulA/foIP-03 | C3 | 30.56 | 75.06 | 1.81 |                   |
| tet(32)      | C3 |       |       |      | NoAmplification   |
| tet(34)      | C3 | 30.46 | 75.88 | 2.02 |                   |
| tet(35)      | C3 |       |       |      | NoAmplification   |
| tet(36)-A    | C3 |       |       |      | NoAmplification   |
| tet(36)-B    | C3 |       |       |      | NoAmplification   |
| tet(37)      | C3 | 36.81 | 83.1  | 1.84 |                   |
| tetA-01      | C3 | 34.1  | 85.08 | 1.91 |                   |
| tetA-02      | C3 |       |       |      | NoAmplification   |
| tetB-01      | C3 | 27.81 | 79.68 | 1.97 |                   |
| tetB-02      | C3 |       |       |      | NoAmplification   |
| tetC-01      | C3 | 28.97 | 75.3  | 2.03 |                   |
| tetC-02      | C3 |       |       |      | NoAmplification   |
| tetD-01      | C3 |       |       |      | NoAmplification   |
| tetD-02      | C3 | 38.93 | 75.82 | 1.82 |                   |
| tetE         | C3 |       |       |      | NoAmplification   |
| tetG-01      | C3 | 33.74 | 82.42 | 1.96 | MultipleMeltPeaks |
| tetG-02      | C3 |       |       |      | NoAmplification   |
| tetH         | C3 |       |       |      | NoAmplification   |
| tetJ         | C3 |       |       |      | NoAmplification   |
| tetK         | C3 |       |       |      | NoAmplification   |
| tetL-01      | C3 |       |       |      | NoAmplification   |
| tetL-02      | C3 | 37.9  | 85.43 | 1.64 |                   |
| tetM-01      | C3 | 33.86 | 73.63 | 2.03 | MultipleMeltPeaks |
| tetM-02      | C3 |       |       |      | NoAmplification   |
| tetO-01      | C3 |       |       |      | NoAmplification   |
| tetPA        | C3 |       |       |      | NoAmplification   |
| tetPB-01     | C3 | 39.19 | 83.53 | 1.78 |                   |
| tetPB-02     | C3 | 30.39 | 85.03 | 2.04 |                   |
| tetPB-03     | C3 |       |       |      | NoAmplification   |
| tetPB-05     | C3 |       |       |      | NoAmplification   |
| tetQ         | C3 |       |       |      | NoAmplification   |
| tetR-02      | C3 | 35.32 | 79.86 | 1.9  | MultipleMeltPeaks |
| tetR-03      | C3 |       |       |      | NoAmplification   |
| tetS         | C3 | 37.8  | 85.25 | 1.83 |                   |

|             |    |       |       |      |                   |
|-------------|----|-------|-------|------|-------------------|
| tetT        | C3 |       |       |      | NoAmplification   |
| tetU-01     | C3 |       |       |      | NoAmplification   |
| tetV        | C3 |       |       |      | NoAmplification   |
| tetW-01     | C3 |       |       |      | NoAmplification   |
| tetX        | C3 |       |       |      | NoAmplification   |
| tnpA-01     | C3 |       |       |      | NoAmplification   |
| tnpA-02     | C3 | 37.59 | 84.5  | 1.66 |                   |
| tnpA-03     | C3 | 35.04 | 74.34 | 2.1  |                   |
| tnpA-04     | C3 |       |       |      | NoAmplification   |
| tnpA-05     | C3 | 37.27 | 76.28 | 1.86 |                   |
| tnpA-07     | C3 |       |       |      | NoAmplification   |
| tolC-01     | C3 | 37.13 | 78.87 | 1.74 |                   |
| tolC-02     | C3 | 33.21 | 85.12 | 1.92 |                   |
| tolC-03     | C3 | 33.21 | 85.95 | 1.94 |                   |
| Tp614       | C3 | 39.12 | 83.01 | 1.78 | MultipleMeltPeaks |
| ttgA        | C3 |       |       |      | NoAmplification   |
| ttgB        | C3 | 35.55 | 74.28 | 1.98 |                   |
| vanA        | C3 |       |       |      | NoAmplification   |
| vanB-01     | C3 | 37.47 | 84.4  | 1.98 | MultipleMeltPeaks |
| vanC-01     | C3 |       |       |      | NoAmplification   |
| vanC-02     | C3 |       |       |      | NoAmplification   |
| vanC-03     | C3 | 35.11 | 85.08 | 1.82 |                   |
| vanC1       | C3 |       |       |      | NoAmplification   |
| vanC2/vanC3 | C3 |       |       |      | NoAmplification   |
| vanG        | C3 |       |       |      | NoAmplification   |
| vanHB       | C3 |       |       |      | NoAmplification   |
| vanHD       | C3 | 34.87 | 82.83 | 1.9  |                   |
| vanRA-01    | C3 |       |       |      | NoAmplification   |
| vanRA-02    | C3 |       |       |      | NoAmplification   |
| vanRB       | C3 | 35.45 | 87.44 | 1.84 |                   |
| vanRC       | C3 |       |       |      | NoAmplification   |
| vanRC4      | C3 |       |       |      | NoAmplification   |
| vanRD       | C3 |       |       |      | NoAmplification   |
| vanSA       | C3 |       |       |      | NoAmplification   |
| vanSB       | C3 | 30.13 | 74.57 | 2.08 |                   |
| vanSC-01    | C3 | 39.01 | 84.18 | 1.76 |                   |
| vanSC-02    | C3 |       |       |      | NoAmplification   |
| vanTC-01    | C3 |       |       |      | NoAmplification   |
| vanTC-02    | C3 |       |       |      | NoAmplification   |
| vanTE       | C3 |       |       |      | NoAmplification   |
| vanTG       | C3 |       |       |      | NoAmplification   |
| vanWB       | C3 |       |       |      | NoAmplification   |
| vanWG       | C3 | 36.69 | 74.25 | 1.91 |                   |
| vanXA       | C3 | 39.65 | 73.37 | 1.65 | MultipleMeltPeaks |
| vanXB       | C3 |       |       |      | NoAmplification   |
| vanXD       | C3 | 33.92 | 74.41 | 2.04 |                   |

|              |    |       |       |      |                   |
|--------------|----|-------|-------|------|-------------------|
| vanYB        | C3 | 35.46 | 79.94 | 1.91 |                   |
| vanYD-01     | C3 | 35.29 | 80.89 | 1.87 | MultipleMeltPeaks |
| vanYD-02     | C3 |       |       |      | NoAmplification   |
| vatB-01      | C3 |       |       |      | NoAmplification   |
| vatB-02      | C3 | 37.49 | 79.6  | 1.78 |                   |
| vatC-01      | C3 |       |       |      | NoAmplification   |
| vatC-02      | C3 | 37.91 | 83.24 | 1.83 |                   |
| vatE-01      | C3 | 29.33 | 77.19 | 2.11 |                   |
| vatE-02      | C3 |       |       |      | NoAmplification   |
| vgaA-01      | C3 | 39.14 | 74.86 | 1.8  |                   |
| vgaA-02      | C3 |       |       |      | NoAmplification   |
| vgb-01       | C3 |       |       |      | NoAmplification   |
| vgbB-01      | C3 | 39.38 | 61.75 | 1.69 | MultipleMeltPeaks |
| vgbB-02      | C3 |       |       |      | NoAmplification   |
| yceE/mdtG-0  | C3 | 38.72 | 77.8  | 1.9  |                   |
| yceE/mdtG-0  | C3 | 43.77 | 81.48 | 1.68 | MultipleMeltPeaks |
| yceL/mdtH-0  | C3 | 37.95 | 85.18 | 1.8  |                   |
| yceL/mdtH-0  | C3 |       |       |      | NoAmplification   |
| yceL/mdtH-0  | C3 |       |       |      | NoAmplification   |
| yidY/mdtL-01 | C3 | 30.14 | 75.93 | 1.96 | MultipleMeltPeaks |
| yidY/mdtL-02 | C3 |       |       |      | NoAmplification   |

| Assay          | Sample | Ct | Tm    | Efficiency | Flags                  |
|----------------|--------|----|-------|------------|------------------------|
| 16S rRNA       | C4     |    | 18.62 | 82.1       | 1.97                   |
| aac            | C4     |    | 31.2  | 80.71      | 1.73 MultipleMeltPeaks |
| aac(6')-Ib(akz | C4     |    | 32.31 | 83.8       | 1.96                   |
| aac(6')-Ib(akz | C4     |    | 29.79 | 81.61      | 1.97                   |
| aac(6')-Ib(akz | C4     |    | 32.95 | 78.82      | 1.99                   |
| aac(6')-II     | C4     |    | 30.99 | 83.1       | 1.85                   |
| aac(6')I1      | C4     |    | 37.51 | 88.25      | 1.83                   |
| aacA/aphD      | C4     |    |       |            | NoAmplification        |
| aacC           | C4     |    | 29.59 | 91.87      | 1.94                   |
| aacC1          | C4     |    |       |            | NoAmplification        |
| aacC2          | C4     |    |       |            | NoAmplification        |
| aacC4          | C4     |    | 35.31 | 87.37      | 1.88 MultipleMeltPeaks |
| aadA-01        | C4     |    |       |            | NoAmplification        |
| aadA-02        | C4     |    | 35.32 | 80.53      | 1.93                   |
| aadA-1-01      | C4     |    | 35.11 | 81.24      | 1.95 MultipleMeltPeaks |
| aadA-1-02      | C4     |    |       |            | NoAmplification        |
| aadA1          | C4     |    | 32.06 | 83.48      | 1.99                   |
| aadA2-01       | C4     |    | 34.59 | 89.16      | 1.81                   |
| aadA2-02       | C4     |    | 31.93 | 75.43      | 2.07                   |
| aadA2-03       | C4     |    | 35.94 | 81.65      | 1.86 MultipleMeltPeaks |
| aadA5-01       | C4     |    | 33.81 | 88.86      | 1.9                    |
| aadA5-02       | C4     |    | 35.15 | 84.08      | 1.9 MultipleMeltPeaks  |
| aadA9-01       | C4     |    | 36.92 | 78.4       | 2.29 MultipleMeltPeaks |
| aadA9-02       | C4     |    |       |            | NoAmplification        |
| aadD           | C4     |    |       |            | NoAmplification        |
| aadE           | C4     |    | 38.14 | 71.79      | 1.97                   |
| acrA-01        | C4     |    | 30.91 | 88.85      | 1.93                   |
| acrA-02        | C4     |    | 38.32 | 61.92      | 1.87 MultipleMeltPeaks |
| acrA-03        | C4     |    | 35.72 | 88.92      | 1.82 MultipleMeltPeaks |
| acrA-04        | C4     |    | 29.19 | 87.1       | 1.98                   |
| acrA-05        | C4     |    | 29.19 | 84.82      | 1.94 MultipleMeltPeaks |
| acrB-01        | C4     |    | 33.28 | 77.19      | 2.03                   |
| acrF           | C4     |    | 26.58 | 82.88      | 1.87 MultipleMeltPeaks |
| acrR-01        | C4     |    | 34.75 | 85.47      | 1.81                   |
| acrR-02        | C4     |    | 38.84 | 86.71      | 1.74 MultipleMeltPeaks |
| Actin          | C4     |    | 21.99 | 86.91      | 1.96                   |
| adeA           | C4     |    | 31.69 | 76.66      | 1.94 MultipleMeltPeaks |
| ampC-01        | C4     |    | 33.22 | 78.64      | 1.99 MultipleMeltPeaks |
| ampC-02        | C4     |    | 37.16 | 62.1       | 2.12 MultipleMeltPeaks |
| ampC-04        | C4     |    | 30.62 | 85.11      | 1.86                   |
| ampC-05        | C4     |    | 39.94 | 61.3       | 1.48 MultipleMeltPeaks |
| ampC-06        | C4     |    |       |            | NoAmplification        |
| ampC-07        | C4     |    | 31.48 | 88.68      | 1.85                   |
| ampC-09        | C4     |    |       |            | CurveFitFailed         |
| ampC/blaDH     | C4     |    | 32.91 | 85.08      | 1.92                   |

|                          |    |       |       |      |                   |
|--------------------------|----|-------|-------|------|-------------------|
| aph                      | C4 |       |       |      | NoAmplification   |
| aph(2')-Id-01            | C4 |       |       |      | NoAmplification   |
| aph(2')-Id-02            | C4 |       |       |      | NoAmplification   |
| aph6ia                   | C4 |       |       |      | NoAmplification   |
| aphA1(aka k <sub>z</sub> | C4 |       |       |      | NoAmplification   |
| bacA-01                  | C4 |       |       |      | NoAmplification   |
| bacA-02                  | C4 | 35.11 | 83.56 | 1.73 | MultipleMeltPeaks |
| BETA-globin              | C4 | 23.14 | 84.04 | 2    |                   |
| bla-ACC-1                | C4 | 32.52 | 86.08 | 1.94 |                   |
| bla-L1                   | C4 | 30.05 | 83.93 | 1.98 |                   |
| bla1                     | C4 |       |       |      | NoAmplification   |
| blaCMY                   | C4 | 38.1  | 80.86 | 1.78 | MultipleMeltPeaks |
| blaCMY2-01               | C4 |       |       |      | NoAmplification   |
| blaCMY2-02               | C4 | 28.6  | 85.11 | 2.01 | MultipleMeltPeaks |
| blaCTX-M-01              | C4 | 35.01 | 86.59 | 1.95 |                   |
| blaCTX-M-02              | C4 | 35.74 | 80.06 | 1.8  | MultipleMeltPeaks |
| blaCTX-M-03              | C4 | 37.99 | 62.89 | 1.83 | MultipleMeltPeaks |
| blaCTX-M-04              | C4 | 34.22 | 86.3  | 1.9  | MultipleMeltPeaks |
| blaCTX-M-05              | C4 | 32.24 | 76.53 | 1.8  |                   |
| blaCTX-M-06              | C4 |       |       |      | NoAmplification   |
| blaGES                   | C4 |       |       |      | NoAmplification   |
| blaIMP-01                | C4 |       |       |      | NoAmplification   |
| blaIMP-02                | C4 | 34.78 | 85.22 | 1.92 |                   |
| blaMOX/blaC              | C4 |       |       |      | NoAmplification   |
| blaOCH                   | C4 |       |       |      | NoAmplification   |
| blaOKP                   | C4 |       |       |      | NoAmplification   |
| blaOXA1/blaC             | C4 |       |       |      | NoAmplification   |
| blaOXA10-01              | C4 |       |       |      | NoAmplification   |
| blaOXA10-02              | C4 |       |       |      | NoAmplification   |
| blaOXY                   | C4 | 37.71 | 67.94 | 1.71 | MultipleMeltPeaks |
| blaPAO                   | C4 |       |       |      | NoAmplification   |
| blaPER                   | C4 |       |       |      | NoAmplification   |
| blaPSE                   | C4 |       |       |      | NoAmplification   |
| blaROB                   | C4 | 37.31 | 64.02 | 1.66 | MultipleMeltPeaks |
| blaSFO                   | C4 | 30.34 | 80.11 | 1.96 | MultipleMeltPeaks |
| blaSHV-01                | C4 |       |       |      | CurveFitFailed    |
| blaSHV-02                | C4 |       |       |      | CurveFitFailed    |
| blaTEM                   | C4 | 34.18 | 77.83 | 2.05 |                   |
| blaTLA                   | C4 |       |       |      | NoAmplification   |
| blaVEB                   | C4 |       |       |      | NoAmplification   |
| blaVIM                   | C4 |       |       |      | NoAmplification   |
| blaZ                     | C4 |       |       |      | NoAmplification   |
| carB                     | C4 | 39.87 | 82.66 | 1.79 |                   |
| catA1                    | C4 |       |       |      | NoAmplification   |
| catB3                    | C4 | 37.7  | 80.03 | 1.79 | MultipleMeltPeaks |
| catB8                    | C4 | 28.44 | 83.01 | 1.99 |                   |

|            |    |       |       |      |                              |
|------------|----|-------|-------|------|------------------------------|
| ceoA       | C4 | 28.41 | 82.34 | 1.97 |                              |
| cepA       | C4 |       |       |      | NoAmplification              |
| cfiA       | C4 | 31.8  | 86.39 | 1.91 | MultipleMeltPeaks            |
| cfr        | C4 |       |       |      | NoAmplification              |
| cfxA       | C4 | 23.5  | 77.66 | 2.08 |                              |
| cmeA       | C4 | 36.77 | 81.85 | 1.82 | MultipleMeltPeaks            |
| cmlA1-01   | C4 | 37.87 | 80.75 | 1.81 |                              |
| cmlA1-02   | C4 |       |       |      | NoAmplification              |
| cmr        | C4 |       |       |      | NoAmplification              |
| cmx(A)     | C4 | 28.78 | 86.33 | 1.99 |                              |
| cphA-01    | C4 | 30.61 | 91.42 | 1.99 |                              |
| cphA-02    | C4 | 32.69 | 82.36 | 1.97 | MultipleMeltPeaks            |
| dfrA1      | C4 | 37.5  | 81.95 | 1.88 |                              |
| dfrA12     | C4 | 37.44 | 77.19 | 1.85 | MultipleMeltPeaks            |
| emrD       | C4 | 38.01 | 89.08 | 1.7  | MultipleMeltPeaks            |
| ereA       | C4 | 39.16 | 83.34 | 1.75 |                              |
| ereB       | C4 | 30.48 | 85.66 | 2.03 |                              |
| erm(34)    | C4 |       |       |      | NoAmplification              |
| erm(35)    | C4 |       |       |      | NoAmplification              |
| erm(36)    | C4 | 31.09 | 82.76 | 2.12 |                              |
| ermA       | C4 |       |       |      | LowEfficiency, CtIsSmall, Ci |
| ermA/ermTR | C4 |       |       |      | NoAmplification              |
| ermB       | C4 |       |       |      | NoAmplification              |
| ermC       | C4 |       |       |      | LowEfficiency, CtIsSmall, Ci |
| ermF       | C4 |       |       |      | NoAmplification              |
| ermJ/ermD  | C4 |       |       |      | NoAmplification              |
| ermK-01    | C4 | 37.08 | 61.87 | 2.27 | MultipleMeltPeaks            |
| ermK-02    | C4 | 38.78 | 88.83 | 1.7  | MultipleMeltPeaks            |
| ermT-01    | C4 |       |       |      | NoAmplification              |
| ermT-02    | C4 |       |       |      | CurveFitFailed               |
| ermX       | C4 | 36.35 | 83.92 | 1.72 | MultipleMeltPeaks            |
| ermY       | C4 |       |       |      | NoAmplification              |
| fabK       | C4 | 25.87 | 79.44 | 2.1  |                              |
| floR       | C4 | 37.24 | 83.55 | 1.89 | MultipleMeltPeaks            |
| folA       | C4 |       |       |      | NoAmplification              |
| fosB       | C4 |       |       |      | LowEfficiency, CtIsSmall, S: |
| fosX       | C4 |       |       |      | NoAmplification              |
| fox5       | C4 | 26.68 | 86.75 | 1.97 |                              |
| imiR       | C4 |       |       |      | CurveFitFailed               |
| lmrA-01    | C4 | 39.46 | 79.62 | 1.77 |                              |
| intl       | C4 | 30.73 | 84.73 | 1.94 |                              |
| intl1      | C4 | 21.42 | 86.98 | 2    |                              |
| IS613      | C4 | 25.29 | 79.57 | 2.02 |                              |
| lnuA-01    | C4 |       |       |      | NoAmplification              |
| lnuB-01    | C4 |       |       |      | NoAmplification              |
| lnuB-02    | C4 |       |       |      | NoAmplification              |

|               |    |       |       |      |                   |
|---------------|----|-------|-------|------|-------------------|
| lnuC          | C4 | 38.41 | 84.04 | 1.63 | MultipleMeltPeaks |
| marR-01       | C4 | 35.24 | 85.2  | 1.89 |                   |
| matA/mel      | C4 | 22.57 | 77.69 | 2.05 |                   |
| mdetI1        | C4 |       |       |      | NoAmplification   |
| mdtA          | C4 | 36.7  | 64.28 | 2.24 | MultipleMeltPeaks |
| mdtE/yhiU     | C4 | 37.39 | 88.08 | 1.91 | MultipleMeltPeaks |
| mecA          | C4 |       |       |      | NoAmplification   |
| mefA          | C4 | 21.85 | 80.48 | 1.97 |                   |
| mepA          | C4 | 31.94 | 87.17 | 2.01 |                   |
| mexA          | C4 | 36.59 | 62.08 | 2.31 | MultipleMeltPeaks |
| mexD          | C4 | 38.58 | 84.48 | 1.87 | MultipleMeltPeaks |
| mexE          | C4 | 39.58 | 89.03 | 1.69 | MultipleMeltPeaks |
| mexF          | C4 | 28.28 | 81.55 | 1.83 |                   |
| mphA-01       | C4 | 30.16 | 86.56 | 1.99 |                   |
| mphA-02       | C4 | 31.3  | 88.12 | 1.86 | MultipleMeltPeaks |
| mphB          | C4 | 35.18 | 84.67 | 1.91 |                   |
| mphC          | C4 | 37.59 | 78.85 | 1.74 | MultipleMeltPeaks |
| msrA-01       | C4 |       |       |      | NoAmplification   |
| msrC-01       | C4 |       |       |      | NoAmplification   |
| mtrC-01       | C4 | 36.23 | 82.34 | 1.91 |                   |
| mtrC-02       | C4 | 31.27 | 84.33 | 1.99 |                   |
| mtrD-02       | C4 | 27.24 | 82.49 | 2.01 | MultipleMeltPeaks |
| mtrD-03       | C4 | 34.24 | 80.63 | 1.9  |                   |
| NDM1          | C4 | 38.23 | 90.99 | 1.73 | MultipleMeltPeaks |
| nimE          | C4 | 36.68 | 61.95 | 1.87 | MultipleMeltPeaks |
| nisB          | C4 | 38.5  | 82.06 | 1.81 |                   |
| oleC          | C4 | 37.12 | 87.47 | 1.93 |                   |
| oprD          | C4 | 28.55 | 91.85 | 1.97 | MultipleMeltPeaks |
| oprJ          | C4 | 30.8  | 88.46 | 1.85 |                   |
| pbp           | C4 |       |       |      | NoAmplification   |
| pbp2x         | C4 |       |       |      | NoAmplification   |
| Pbp5          | C4 |       |       |      | NoAmplification   |
| penA          | C4 |       |       |      | NoAmplification   |
| pikR1         | C4 |       |       |      | NoAmplification   |
| pikR2         | C4 | 30.78 | 85.1  | 2.06 |                   |
| pmrA          | C4 | 27.78 | 79.23 | 2.08 |                   |
| pncA          | C4 | 27.87 | 89.58 | 1.9  |                   |
| putative mulI | C4 | 35.5  | 76.92 | 1.9  | MultipleMeltPeaks |
| qac           | C4 | 34.27 | 78.68 | 1.96 | MultipleMeltPeaks |
| qacA          | C4 | 34.89 | 70.64 | 1.89 |                   |
| qacA/qacB     | C4 | 37.2  | 82.93 | 1.44 | MultipleMeltPeaks |
| qacEdelta1-0  | C4 |       |       |      | NoAmplification   |
| qacEdelta1-0  | C4 | 35.96 | 75.14 | 1.88 | MultipleMeltPeaks |
| qacH-01       | C4 | 32.68 | 82.89 | 2.01 | MultipleMeltPeaks |
| qacH-02       | C4 | 34.77 | 83.94 | 1.66 |                   |
| qnrA          | C4 | 35.59 | 73.4  | 2.02 | MultipleMeltPeaks |



|              |    |       |       |      |                               |
|--------------|----|-------|-------|------|-------------------------------|
| rarD-02      | C4 |       |       |      | NoAmplification               |
| sat4         | C4 |       |       |      | NoAmplification               |
| sdeB         | C4 |       |       |      | NoAmplification               |
| spcN-01      | C4 |       |       |      | NoAmplification               |
| speA         | C4 |       |       |      | NoAmplification               |
| str          | C4 |       |       |      | NoAmplification               |
| strA         | C4 |       |       |      | NoAmplification               |
| strB         | C4 |       |       |      | NoAmplification               |
| sul1         | C4 | 36.88 | 86.52 | 1.68 |                               |
| sul2         | C4 | 38.74 | 64.4  | 1.66 | MultipleMeltPeaks             |
| sulA/foIP-01 | C4 | 25.78 | 81.94 | 2.01 |                               |
| sulA/foIP-03 | C4 | 26.33 | 83.58 | 2.01 |                               |
| tet(32)      | C4 | 25.62 | 81.27 | 1.99 |                               |
| tet(34)      | C4 | 32.53 | 75.41 | 1.99 |                               |
| tet(35)      | C4 |       |       |      | NoAmplification               |
| tet(36)-A    | C4 |       |       |      | NoAmplification               |
| tet(36)-B    | C4 |       |       |      | NoAmplification               |
| tet(37)      | C4 | 30.71 | 80.69 | 2.01 |                               |
| tetA-01      | C4 | 31.7  | 85.12 | 1.93 |                               |
| tetA-02      | C4 | 32.29 | 88.04 | 1.91 |                               |
| tetB-01      | C4 | 26.32 | 79.42 | 1.97 | MultipleMeltPeaks             |
| tetB-02      | C4 | 24.34 | 79.69 | 2.02 |                               |
| tetC-01      | C4 |       |       |      | NoAmplification               |
| tetC-02      | C4 | 24.46 | 76.23 | 2.07 |                               |
| tetD-01      | C4 |       |       |      | NoAmplification               |
| tetD-02      | C4 |       |       |      | NoAmplification               |
| tetE         | C4 | 38.27 | 82.81 | 2    |                               |
| tetG-01      | C4 | 34.49 | 76.51 | 1.86 | MultipleMeltPeaks             |
| tetG-02      | C4 | 37.71 | 84.64 | 1.8  | MultipleMeltPeaks             |
| tetH         | C4 |       |       |      | NoAmplification               |
| tetJ         | C4 |       |       |      | NoAmplification               |
| tetK         | C4 |       |       |      | NoAmplification               |
| tetL-01      | C4 |       |       |      | NoAmplification               |
| tetL-02      | C4 | 32.02 | 85.27 | 1.87 |                               |
| tetM-01      | C4 | 25.61 | 76.2  | 2.01 |                               |
| tetM-02      | C4 | 25.47 | 77.56 | 2.04 |                               |
| tetO-01      | C4 | 28.3  | 76.84 | 2.04 |                               |
| tetPA        | C4 |       |       |      | NoAmplification               |
| tetPB-01     | C4 | 37.76 | 83.6  | 1.88 |                               |
| tetPB-02     | C4 | 29.6  | 85.06 | 2.04 |                               |
| tetPB-03     | C4 |       |       |      | NoAmplification               |
| tetPB-05     | C4 |       |       |      | CurveFitFailed                |
| tetQ         | C4 | 36.39 | 76.82 | 1.91 |                               |
| tetR-02      | C4 | 31.19 | 84.71 | 1.95 |                               |
| tetR-03      | C4 | 25.4  | 76.14 | 2    |                               |
| tetS         | C4 |       |       |      | LowEfficiency, CtlIsSmall, S: |

|             |    |       |       |      |                             |
|-------------|----|-------|-------|------|-----------------------------|
| tetT        | C4 |       |       |      | NoAmplification             |
| tetU-01     | C4 |       |       |      | NoAmplification             |
| tetV        | C4 |       |       |      | NoAmplification             |
| tetW-01     | C4 |       |       |      | NoAmplification             |
| tetX        | C4 |       |       |      | BadR2, CtIsSmall, Saturatio |
| tnpA-01     | C4 |       |       |      | NoAmplification             |
| tnpA-02     | C4 | 31.54 | 87.09 | 1.8  |                             |
| tnpA-03     | C4 | 29.41 | 77.71 | 2.06 |                             |
| tnpA-04     | C4 |       |       |      | NoAmplification             |
| tnpA-05     | C4 | 34.48 | 82.62 | 1.88 |                             |
| tnpA-07     | C4 |       |       |      | NoAmplification             |
| tolC-01     | C4 | 38.4  | 80.27 | 1.75 | MultipleMeltPeaks           |
| tolC-02     | C4 | 31.25 | 83.38 | 1.97 | MultipleMeltPeaks           |
| tolC-03     | C4 | 30.95 | 86.02 | 1.91 |                             |
| Tp614       | C4 | 37.78 | 78.85 | 1.87 | MultipleMeltPeaks           |
| ttgA        | C4 |       |       |      | NoAmplification             |
| ttgB        | C4 | 35.79 | 80.94 | 1.9  | MultipleMeltPeaks           |
| vanA        | C4 |       |       |      | NoAmplification             |
| vanB-01     | C4 | 33.81 | 83.44 | 2.01 |                             |
| vanC-01     | C4 |       |       |      | NoAmplification             |
| vanC-02     | C4 |       |       |      | NoAmplification             |
| vanC-03     | C4 | 30.02 | 86.11 | 1.89 |                             |
| vanC1       | C4 |       |       |      | NoAmplification             |
| vanC2/vanC3 | C4 | 36.2  | 89.66 | 1.79 |                             |
| vanG        | C4 |       |       |      | NoAmplification             |
| vanHB       | C4 | 35.17 | 82.1  | 1.91 |                             |
| vanHD       | C4 |       |       |      | CurveFitFailed              |
| vanRA-01    | C4 |       |       |      | NoAmplification             |
| vanRA-02    | C4 |       |       |      | NoAmplification             |
| vanRB       | C4 | 31.78 | 87.41 | 1.94 | MultipleMeltPeaks           |
| vanRC       | C4 |       |       |      | NoAmplification             |
| vanRC4      | C4 |       |       |      | NoAmplification             |
| vanRD       | C4 |       |       |      | NoAmplification             |
| vanSA       | C4 |       |       |      | NoAmplification             |
| vanSB       | C4 | 31.28 | 74.52 | 2.02 |                             |
| vanSC-01    | C4 | 33.44 | 84    | 2.02 |                             |
| vanSC-02    | C4 |       |       |      | NoAmplification             |
| vanTC-01    | C4 |       |       |      | NoAmplification             |
| vanTC-02    | C4 | 35.66 | 86.67 | 1.77 |                             |
| vanTE       | C4 | 39.13 | 78.29 | 1.73 | MultipleMeltPeaks           |
| vanTG       | C4 |       |       |      | NoAmplification             |
| vanWB       | C4 |       |       |      | NoAmplification             |
| vanWG       | C4 | 38.46 | 74.61 | 1.91 |                             |
| vanXA       | C4 |       |       |      | CurveFitFailed              |
| vanXB       | C4 |       |       |      | NoAmplification             |
| vanXD       | C4 | 32.31 | 75.39 | 2.03 |                             |

|              |    |       |       |      |                   |
|--------------|----|-------|-------|------|-------------------|
| vanYB        | C4 | 37.18 | 61.56 | 2.06 | MultipleMeltPeaks |
| vanYD-01     | C4 | 31.55 | 81.87 | 1.8  |                   |
| vanYD-02     | C4 |       |       |      | NoAmplification   |
| vatB-01      | C4 |       |       |      | NoAmplification   |
| vatB-02      | C4 |       |       |      | CurveFitFailed    |
| vatC-01      | C4 |       |       |      | NoAmplification   |
| vatC-02      | C4 | 32.31 | 87.58 | 1.92 |                   |
| vatE-01      | C4 | 28.62 | 76.94 | 2.12 |                   |
| vatE-02      | C4 |       |       |      | NoAmplification   |
| vgaA-01      | C4 | 35.79 | 76.33 | 1.94 |                   |
| vgaA-02      | C4 |       |       |      | CurveFitFailed    |
| vgb-01       | C4 | 38.42 | 73.49 | 1.87 |                   |
| vgbB-01      | C4 | 37.49 | 76.49 | 1.71 |                   |
| vgbB-02      | C4 |       |       |      | NoAmplification   |
| yceE/mdtG-0  | C4 | 38.34 | 77.69 | 1.79 |                   |
| yceE/mdtG-0  | C4 | 39.66 | 81.47 | 1.73 | MultipleMeltPeaks |
| yceL/mdtH-0  | C4 | 29.89 | 84.56 | 1.93 |                   |
| yceL/mdtH-0  | C4 |       |       |      | NoAmplification   |
| yceL/mdtH-0  | C4 | 36.55 | 88.68 | 1.82 |                   |
| yidY/mdtL-01 | C4 | 31.3  | 82.7  | 1.96 |                   |
| yidY/mdtL-02 | C4 | 36.45 | 75.23 | 1.96 |                   |

| Assay          | Sample | Ct | Tm    | Efficiency | Flags                  |
|----------------|--------|----|-------|------------|------------------------|
| 16S rRNA       | C5     |    | 20.97 | 82.05      | 1.94                   |
| aac            | C5     |    | 36.32 | 77.5       | 1.86                   |
| aac(6')-Ib(akz | C5     |    |       |            | NoAmplification        |
| aac(6')-Ib(akz | C5     |    | 33.63 | 80.67      | 1.98 MultipleMeltPeaks |
| aac(6')-Ib(akz | C5     |    | 35.75 | 77.76      | 1.94                   |
| aac(6')-II     | C5     |    | 37.84 | 81.25      | 1.57 MultipleMeltPeaks |
| aac(6')I1      | C5     |    | 37.54 | 63.4       | 1.9 MultipleMeltPeaks  |
| aacA/aphD      | C5     |    |       |            | NoAmplification        |
| aacC           | C5     |    | 30.78 | 87.41      | 1.87                   |
| aacC1          | C5     |    |       |            | NoAmplification        |
| aacC2          | C5     |    | 37.92 | 82.05      | 1.81                   |
| aacC4          | C5     |    |       |            | NoAmplification        |
| aadA-01        | C5     |    |       |            | NoAmplification        |
| aadA-02        | C5     |    | 35.11 | 80.52      | 1.92                   |
| aadA-1-01      | C5     |    | 35.81 | 77.13      | 1.97                   |
| aadA-1-02      | C5     |    |       |            | NoAmplification        |
| aadA1          | C5     |    | 33.36 | 84.11      | 2.03                   |
| aadA2-01       | C5     |    |       |            | NoAmplification        |
| aadA2-02       | C5     |    | 32.22 | 75.56      | 2.04                   |
| aadA2-03       | C5     |    |       |            | NoAmplification        |
| aadA5-01       | C5     |    | 37.43 | 88.99      | 1.74 MultipleMeltPeaks |
| aadA5-02       | C5     |    | 37.19 | 78.24      | 1.8 MultipleMeltPeaks  |
| aadA9-01       | C5     |    |       |            | NoAmplification        |
| aadA9-02       | C5     |    |       |            | NoAmplification        |
| aadD           | C5     |    |       |            | NoAmplification        |
| aadE           | C5     |    |       |            | NoAmplification        |
| acrA-01        | C5     |    | 32.92 | 84.09      | 1.95 MultipleMeltPeaks |
| acrA-02        | C5     |    |       |            | NoAmplification        |
| acrA-03        | C5     |    |       |            | NoAmplification        |
| acrA-04        | C5     |    | 29.3  | 80.9       | 2                      |
| acrA-05        | C5     |    | 29.64 | 86.69      | 1.97                   |
| acrB-01        | C5     |    |       |            | NoAmplification        |
| acrF           | C5     |    | 32.19 | 82.67      | 1.82 MultipleMeltPeaks |
| acrR-01        | C5     |    | 35.34 | 81.25      | 1.91                   |
| acrR-02        | C5     |    |       |            | NoAmplification        |
| Actin          | C5     |    | 23.33 | 86.84      | 1.96                   |
| adeA           | C5     |    |       |            | NoAmplification        |
| ampC-01        | C5     |    | 34.46 | 85.66      | 1.92                   |
| ampC-02        | C5     |    | 37.02 | 61.59      | 1.99 MultipleMeltPeaks |
| ampC-04        | C5     |    | 33.05 | 92.99      | 1.62                   |
| ampC-05        | C5     |    |       |            | NoAmplification        |
| ampC-06        | C5     |    |       |            | NoAmplification        |
| ampC-07        | C5     |    | 32.97 | 79.57      | 1.95 MultipleMeltPeaks |
| ampC-09        | C5     |    |       |            | NoAmplification        |
| ampC/blaDH     | C5     |    | 34.17 | 84.53      | 1.91                   |

|                          |    |       |       |      |                   |
|--------------------------|----|-------|-------|------|-------------------|
| aph                      | C5 |       |       |      | NoAmplification   |
| aph(2')-Id-01            | C5 |       |       |      | NoAmplification   |
| aph(2')-Id-02            | C5 |       |       |      | NoAmplification   |
| aph6ia                   | C5 |       |       |      | NoAmplification   |
| aphA1(aka k <sub>z</sub> | C5 |       |       |      | NoAmplification   |
| bacA-01                  | C5 |       |       |      | NoAmplification   |
| bacA-02                  | C5 | 33.44 | 83.28 | 1.83 | MultipleMeltPeaks |
| BETA-globin              | C5 | 24.77 | 84.07 | 1.96 |                   |
| bla-ACC-1                | C5 | 38.05 | 85.99 | 1.74 | MultipleMeltPeaks |
| bla-L1                   | C5 | 31.74 | 82.25 | 1.96 |                   |
| bla1                     | C5 |       |       |      | NoAmplification   |
| blaCMY                   | C5 |       |       |      | NoAmplification   |
| blaCMY2-01               | C5 |       |       |      | NoAmplification   |
| blaCMY2-02               | C5 | 29.72 | 84.63 | 1.99 | MultipleMeltPeaks |
| blaCTX-M-01              | C5 |       |       |      | NoAmplification   |
| blaCTX-M-02              | C5 | 35.48 | 83.6  | 1.79 | MultipleMeltPeaks |
| blaCTX-M-03              | C5 |       |       |      | NoAmplification   |
| blaCTX-M-04              | C5 | 38.38 | 87.57 | 1.66 | MultipleMeltPeaks |
| blaCTX-M-05              | C5 | 33.25 | 76.62 | 1.85 |                   |
| blaCTX-M-06              | C5 |       |       |      | NoAmplification   |
| blaGES                   | C5 |       |       |      | NoAmplification   |
| blaIMP-01                | C5 |       |       |      | NoAmplification   |
| blaIMP-02                | C5 |       |       |      | NoAmplification   |
| blaMOX/blaC              | C5 |       |       |      | NoAmplification   |
| blaOCH                   | C5 |       |       |      | NoAmplification   |
| blaOKP                   | C5 |       |       |      | NoAmplification   |
| blaOXA1/blaC             | C5 |       |       |      | NoAmplification   |
| blaOXA10-01              | C5 |       |       |      | NoAmplification   |
| blaOXA10-02              | C5 |       |       |      | NoAmplification   |
| blaOXY                   | C5 | 36.75 | 88.8  | 1.73 |                   |
| blaPAO                   | C5 |       |       |      | NoAmplification   |
| blaPER                   | C5 |       |       |      | CurveFitFailed    |
| blaPSE                   | C5 |       |       |      | NoAmplification   |
| blaROB                   | C5 |       |       |      | NoAmplification   |
| blaSFO                   | C5 | 32.85 | 82.74 | 1.88 |                   |
| blaSHV-01                | C5 | 36.87 | 85.49 | 1.77 |                   |
| blaSHV-02                | C5 | 32.43 | 83.84 | 2.06 |                   |
| blaTEM                   | C5 | 28.47 | 79.18 | 2.04 |                   |
| blaTLA                   | C5 |       |       |      | NoAmplification   |
| blaVEB                   | C5 |       |       |      | NoAmplification   |
| blaVIM                   | C5 |       |       |      | NoAmplification   |
| blaZ                     | C5 |       |       |      | NoAmplification   |
| carB                     | C5 |       |       |      | NoAmplification   |
| catA1                    | C5 |       |       |      | NoAmplification   |
| catB3                    | C5 |       |       |      | NoAmplification   |
| catB8                    | C5 | 30.41 | 82.79 | 1.98 |                   |

|            |    |       |       |      |                              |
|------------|----|-------|-------|------|------------------------------|
| ceoA       | C5 | 30.73 | 82.35 | 1.94 |                              |
| cepA       | C5 |       |       |      | NoAmplification              |
| cfiA       | C5 | 32.52 | 80.49 | 1.84 |                              |
| cfr        | C5 |       |       |      | NoAmplification              |
| cfxA       | C5 | 25.86 | 77.58 | 2.05 |                              |
| cmeA       | C5 | 38.1  | 79.39 | 1.8  |                              |
| cmlA1-01   | C5 | 37.99 | 61.47 | 1.89 | BadR2, MultipleMeltPeaks     |
| cmlA1-02   | C5 |       |       |      | NoAmplification              |
| cmr        | C5 |       |       |      | NoAmplification              |
| cmx(A)     | C5 | 29.38 | 84.61 | 1.99 |                              |
| cphA-01    | C5 | 34.34 | 85.58 | 1.94 |                              |
| cphA-02    | C5 |       |       |      | CurveFitFailed               |
| dfrA1      | C5 |       |       |      | NoAmplification              |
| dfrA12     | C5 | 39.12 | 82.79 | 1.73 | MultipleMeltPeaks            |
| emrD       | C5 | 36.48 | 83.6  | 1.86 |                              |
| ereA       | C5 | 31.87 | 82.63 | 1.95 |                              |
| ereB       | C5 |       |       |      | NoAmplification              |
| erm(34)    | C5 |       |       |      | NoAmplification              |
| erm(35)    | C5 |       |       |      | NoAmplification              |
| erm(36)    | C5 |       |       |      | NoAmplification              |
| ermA       | C5 |       |       |      | NoAmplification              |
| ermA/ermTR | C5 |       |       |      | NoAmplification              |
| ermB       | C5 | 26.43 | 75.2  | 2.09 |                              |
| ermC       | C5 | 34.62 | 85.47 | 1.95 |                              |
| ermF       | C5 |       |       |      | NoAmplification              |
| ermJ/ermD  | C5 |       |       |      | NoAmplification              |
| ermK-01    | C5 |       |       |      | NoAmplification              |
| ermK-02    | C5 | 38.25 | 84.26 | 1.79 | MultipleMeltPeaks            |
| ermT-01    | C5 |       |       |      | NoAmplification              |
| ermT-02    | C5 |       |       |      | NoAmplification              |
| ermX       | C5 | 36.19 | 61.31 | 2.28 | MultipleMeltPeaks            |
| ermY       | C5 |       |       |      | NoAmplification              |
| fabK       | C5 | 27.29 | 79.35 | 2.08 |                              |
| floR       | C5 |       |       |      | NoAmplification              |
| folA       | C5 | 37.07 | 73.8  | 1.96 |                              |
| fosB       | C5 |       |       |      | LowEfficiency, CtIsSmall, S: |
| fosX       | C5 |       |       |      | NoAmplification              |
| fox5       | C5 | 27.91 | 86.57 | 1.96 |                              |
| imiR       | C5 |       |       |      | CurveFitFailed               |
| ImrA-01    | C5 |       |       |      | NoAmplification              |
| intl       | C5 | 32.17 | 84.8  | 1.95 |                              |
| intl1      | C5 | 23.04 | 87.21 | 1.96 |                              |
| IS613      | C5 | 26.23 | 79.46 | 1.92 |                              |
| lnuA-01    | C5 |       |       |      | NoAmplification              |
| lnuB-01    | C5 |       |       |      | NoAmplification              |
| lnuB-02    | C5 |       |       |      | NoAmplification              |

|               |    |       |       |      |                   |
|---------------|----|-------|-------|------|-------------------|
| lnuC          | C5 |       |       |      | CurveFitFailed    |
| marR-01       | C5 |       |       |      | NoAmplification   |
| matA/mel      | C5 | 25.01 | 77.63 | 2.05 |                   |
| mdet1         | C5 |       |       |      | NoAmplification   |
| mdtA          | C5 |       |       |      | NoAmplification   |
| mdtE/yhiU     | C5 |       |       |      | NoAmplification   |
| mecA          | C5 |       |       |      | NoAmplification   |
| mefA          | C5 | 24.3  | 80.5  | 1.98 |                   |
| mepA          | C5 | 33.91 | 78.69 | 2.02 |                   |
| mexA          | C5 |       |       |      | NoAmplification   |
| mexD          | C5 | 34.53 | 80.08 | 2.02 |                   |
| mexE          | C5 | 37.63 | 80.92 | 1.89 |                   |
| mexF          | C5 | 30.2  | 87.48 | 2.06 | MultipleMeltPeaks |
| mphA-01       | C5 | 34.89 | 79.92 | 1.98 | MultipleMeltPeaks |
| mphA-02       | C5 | 31.69 | 86.73 | 1.55 |                   |
| mphB          | C5 |       |       |      | NoAmplification   |
| mphC          | C5 | 38.79 | 61.73 | 1.64 | MultipleMeltPeaks |
| msrA-01       | C5 |       |       |      | NoAmplification   |
| msrC-01       | C5 |       |       |      | NoAmplification   |
| mtrC-01       | C5 |       |       |      | NoAmplification   |
| mtrC-02       | C5 | 38.7  | 85.36 | 1.69 |                   |
| mtrD-02       | C5 | 28.39 | 85.14 | 2.01 | MultipleMeltPeaks |
| mtrD-03       | C5 | 40.9  | 85.42 | 1.73 | MultipleMeltPeaks |
| NDM1          | C5 | 38.3  | 78.49 | 1.87 | MultipleMeltPeaks |
| nimE          | C5 | 35.12 | 85.08 | 1.93 |                   |
| nisB          | C5 |       |       |      | NoAmplification   |
| oleC          | C5 |       |       |      | NoAmplification   |
| oprD          | C5 | 29.12 | 84.27 | 1.95 |                   |
| oprJ          | C5 | 33.22 | 88.35 | 1.92 |                   |
| pbp           | C5 |       |       |      | NoAmplification   |
| pbp2x         | C5 |       |       |      | NoAmplification   |
| Pbp5          | C5 |       |       |      | NoAmplification   |
| penA          | C5 |       |       |      | NoAmplification   |
| pikR1         | C5 |       |       |      | NoAmplification   |
| pikR2         | C5 | 35.72 | 85.69 | 1.79 |                   |
| pmrA          | C5 | 33.27 | 78.75 | 2.06 |                   |
| pncA          | C5 | 32.83 | 89.91 | 1.88 |                   |
| putative mulI | C5 |       |       |      | NoAmplification   |
| qac           | C5 | 38.43 | 81.41 | 1.85 |                   |
| qacA          | C5 |       |       |      | NoAmplification   |
| qacA/qacB     | C5 |       |       |      | NoAmplification   |
| qacEdelta1-0  | C5 |       |       |      | NoAmplification   |
| qacEdelta1-0  | C5 | 36.34 | 77.96 | 1.89 | MultipleMeltPeaks |
| qacH-01       | C5 | 33.86 | 86.36 | 1.9  |                   |
| qacH-02       | C5 |       |       |      | NoAmplification   |
| qnrA          | C5 | 40.44 | 73.43 | 1.82 |                   |

|              |    |       |       |      |                   |
|--------------|----|-------|-------|------|-------------------|
| rarD-02      | C5 |       |       |      | NoAmplification   |
| sat4         | C5 |       |       |      | NoAmplification   |
| sdeB         | C5 |       |       |      | NoAmplification   |
| spcN-01      | C5 |       |       |      | NoAmplification   |
| speA         | C5 |       |       |      | NoAmplification   |
| str          | C5 |       |       |      | NoAmplification   |
| strA         | C5 |       |       |      | NoAmplification   |
| strB         | C5 |       |       |      | NoAmplification   |
| sul1         | C5 |       |       |      | NoAmplification   |
| sul2         | C5 |       |       |      | NoAmplification   |
| sulA/foIP-01 | C5 | 27.99 | 81.44 | 1.95 |                   |
| sulA/foIP-03 | C5 | 26.92 | 83.03 | 1.96 |                   |
| tet(32)      | C5 | 28.03 | 81.12 | 1.98 |                   |
| tet(34)      | C5 | 31.42 | 75.46 | 1.98 |                   |
| tet(35)      | C5 |       |       |      | NoAmplification   |
| tet(36)-A    | C5 |       |       |      | NoAmplification   |
| tet(36)-B    | C5 |       |       |      | NoAmplification   |
| tet(37)      | C5 |       |       |      | CurveFitFailed    |
| tetA-01      | C5 | 30.93 | 85.11 | 1.92 |                   |
| tetA-02      | C5 |       |       |      | NoAmplification   |
| tetB-01      | C5 | 33.02 | 86.1  | 1.98 |                   |
| tetB-02      | C5 |       |       |      | NoAmplification   |
| tetC-01      | C5 |       |       |      | NoAmplification   |
| tetC-02      | C5 |       |       |      | NoAmplification   |
| tetD-01      | C5 |       |       |      | NoAmplification   |
| tetD-02      | C5 |       |       |      | NoAmplification   |
| tetE         | C5 |       |       |      | NoAmplification   |
| tetG-01      | C5 | 38.01 | 63.68 | 1.91 | MultipleMeltPeaks |
| tetG-02      | C5 | 38.88 | 77.93 | 1.77 |                   |
| tetH         | C5 |       |       |      | NoAmplification   |
| tetJ         | C5 |       |       |      | NoAmplification   |
| tetK         | C5 |       |       |      | NoAmplification   |
| tetL-01      | C5 |       |       |      | NoAmplification   |
| tetL-02      | C5 | 33.54 | 85.31 | 1.78 |                   |
| tetM-01      | C5 | 26.62 | 76.27 | 1.98 |                   |
| tetM-02      | C5 | 24.93 | 77.69 | 2.02 |                   |
| tetO-01      | C5 | 29.4  | 76.79 | 2.06 |                   |
| tetPA        | C5 |       |       |      | NoAmplification   |
| tetPB-01     | C5 | 38.42 | 87.91 | 1.78 |                   |
| tetPB-02     | C5 | 30.2  | 85.11 | 2.03 |                   |
| tetPB-03     | C5 |       |       |      | NoAmplification   |
| tetPB-05     | C5 |       |       |      | NoAmplification   |
| tetQ         | C5 | 28.24 | 75.96 | 2.02 |                   |
| tetR-02      | C5 | 35.56 | 84.77 | 1.83 | MultipleMeltPeaks |
| tetR-03      | C5 |       |       |      | NoAmplification   |
| tetS         | C5 | 36.71 | 87.33 | 1.88 | MultipleMeltPeaks |



|             |    |       |       |      |                   |
|-------------|----|-------|-------|------|-------------------|
| tetT        | C5 |       |       |      | NoAmplification   |
| tetU-01     | C5 |       |       |      | NoAmplification   |
| tetV        | C5 |       |       |      | NoAmplification   |
| tetW-01     | C5 |       |       |      | NoAmplification   |
| tetX        | C5 |       |       |      | NoAmplification   |
| tnpA-01     | C5 |       |       |      | NoAmplification   |
| tnpA-02     | C5 |       |       |      | NoAmplification   |
| tnpA-03     | C5 | 23.79 | 77.99 | 2.1  |                   |
| tnpA-04     | C5 |       |       |      | NoAmplification   |
| tnpA-05     | C5 |       |       |      | CurveFitFailed    |
| tnpA-07     | C5 |       |       |      | NoAmplification   |
| tolC-01     | C5 | 36.47 | 81.06 | 1.79 | MultipleMeltPeaks |
| tolC-02     | C5 | 31.32 | 83.65 | 1.94 |                   |
| tolC-03     | C5 | 33.01 | 86.09 | 1.88 |                   |
| Tp614       | C5 | 38.79 | 74.23 | 1.8  | MultipleMeltPeaks |
| ttgA        | C5 |       |       |      | CurveFitFailed    |
| ttgB        | C5 | 37.94 | 81.53 | 1.81 |                   |
| vanA        | C5 |       |       |      | NoAmplification   |
| vanB-01     | C5 | 37.25 | 82.74 | 1.79 |                   |
| vanC-01     | C5 | 27.44 | 74.1  | 2.07 |                   |
| vanC-02     | C5 |       |       |      | NoAmplification   |
| vanC-03     | C5 | 32.48 | 78.58 | 1.92 |                   |
| vanC1       | C5 |       |       |      | NoAmplification   |
| vanC2/vanC3 | C5 | 34.94 | 82.83 | 1.94 |                   |
| vanG        | C5 |       |       |      | NoAmplification   |
| vanHB       | C5 | 37.79 | 87.38 | 1.78 | MultipleMeltPeaks |
| vanHD       | C5 | 38.34 | 73.99 | 1.78 | MultipleMeltPeaks |
| vanRA-01    | C5 |       |       |      | NoAmplification   |
| vanRA-02    | C5 |       |       |      | NoAmplification   |
| vanRB       | C5 | 35.37 | 87.4  | 1.83 |                   |
| vanRC       | C5 |       |       |      | NoAmplification   |
| vanRC4      | C5 |       |       |      | NoAmplification   |
| vanRD       | C5 |       |       |      | NoAmplification   |
| vanSA       | C5 |       |       |      | NoAmplification   |
| vanSB       | C5 | 29.05 | 74.69 | 2.09 |                   |
| vanSC-01    | C5 | 36.54 | 84.02 | 1.88 |                   |
| vanSC-02    | C5 |       |       |      | NoAmplification   |
| vanTC-01    | C5 |       |       |      | NoAmplification   |
| vanTC-02    | C5 | 38.66 | 77.1  | 1.74 |                   |
| vanTE       | C5 |       |       |      | NoAmplification   |
| vanTG       | C5 |       |       |      | NoAmplification   |
| vanWB       | C5 |       |       |      | NoAmplification   |
| vanWG       | C5 | 36.98 | 74.22 | 1.89 |                   |
| vanXA       | C5 |       |       |      | CurveFitFailed    |
| vanXB       | C5 |       |       |      | NoAmplification   |
| vanXD       | C5 | 30.61 | 75.2  | 1.93 |                   |

|              |    |       |       |                        |
|--------------|----|-------|-------|------------------------|
| vanYB        | C5 |       |       | NoAmplification        |
| vanYD-01     | C5 | 36.5  | 80.92 | 1.82                   |
| vanYD-02     | C5 |       |       | NoAmplification        |
| vatB-01      | C5 | 39.32 | 74.92 | 1.81                   |
| vatB-02      | C5 |       |       | NoAmplification        |
| vatC-01      | C5 | 37.77 | 81.27 | 1.8                    |
| vatC-02      | C5 | 39.26 | 62.01 | 1.77 MultipleMeltPeaks |
| vatE-01      | C5 | 30.06 | 76.86 | 2.11                   |
| vatE-02      | C5 | 37.93 | 75.65 | 1.92                   |
| vgaA-01      | C5 | 39.83 | 75.48 | 1.7                    |
| vgaA-02      | C5 |       |       | CurveFitFailed         |
| vgb-01       | C5 |       |       | NoAmplification        |
| vgbB-01      | C5 |       |       | NoAmplification        |
| vgbB-02      | C5 |       |       | NoAmplification        |
| yceE/mdtG-0  | C5 |       |       | NoAmplification        |
| yceE/mdtG-0  | C5 | 34.25 | 82.83 | 1.92                   |
| yceL/mdtH-0  | C5 |       |       | CurveFitFailed         |
| yceL/mdtH-0  | C5 |       |       | NoAmplification        |
| yceL/mdtH-0  | C5 |       |       | NoAmplification        |
| yidY/mdtL-01 | C5 | 30.79 | 84.76 | 1.96                   |
| yidY/mdtL-02 | C5 | 37.05 | 74.9  | 1.94                   |

| Assay          | Sample | Ct | Tm    | Efficiency | Flags                  |
|----------------|--------|----|-------|------------|------------------------|
| 16S rRNA       | C6     |    | 20.01 | 82.2       | 1.96                   |
| aac            | C6     |    | 30.09 | 81.03      | 1.38 MultipleMeltPeaks |
| aac(6')-Ib(akz | C6     |    |       |            | NoAmplification        |
| aac(6')-Ib(akz | C6     |    | 31.71 | 80.83      | 1.96                   |
| aac(6')-Ib(akz | C6     |    | 36.34 | 86.04      | 1.87 MultipleMeltPeaks |
| aac(6')-II     | C6     |    | 31.81 | 88.75      | 1.87 MultipleMeltPeaks |
| aac(6')I1      | C6     |    |       |            | NoAmplification        |
| aacA/aphD      | C6     |    |       |            | NoAmplification        |
| aacC           | C6     |    | 31.24 | 91.96      | 1.98 MultipleMeltPeaks |
| aacC1          | C6     |    |       |            | NoAmplification        |
| aacC2          | C6     |    | 39.56 | 82.37      | 1.71 MultipleMeltPeaks |
| aacC4          | C6     |    | 34.83 | 83.62      | 1.94                   |
| aadA-01        | C6     |    |       |            | NoAmplification        |
| aadA-02        | C6     |    | 34.8  | 80.88      | 1.95                   |
| aadA-1-01      | C6     |    | 28.21 | 81.53      | 1.93                   |
| aadA-1-02      | C6     |    |       |            | NoAmplification        |
| aadA1          | C6     |    | 32.29 | 83.25      | 2.04                   |
| aadA2-01       | C6     |    | 38.49 | 63.88      | 1.71 MultipleMeltPeaks |
| aadA2-02       | C6     |    | 31.35 | 75.64      | 2                      |
| aadA2-03       | C6     |    |       |            | NoAmplification        |
| aadA5-01       | C6     |    | 33.71 | 78.11      | 1.96 MultipleMeltPeaks |
| aadA5-02       | C6     |    | 31.38 | 83.28      | 1.99                   |
| aadA9-01       | C6     |    | 36.85 | 87.71      | 1.86 MultipleMeltPeaks |
| aadA9-02       | C6     |    |       |            | NoAmplification        |
| aadD           | C6     |    |       |            | NoAmplification        |
| aadE           | C6     |    |       |            | NoAmplification        |
| acrA-01        | C6     |    | 31.25 | 88.86      | 1.91                   |
| acrA-02        | C6     |    | 32.06 | 84.78      | 1.88                   |
| acrA-03        | C6     |    | 36.84 | 88.37      | 1.86                   |
| acrA-04        | C6     |    | 28.51 | 80.94      | 1.97                   |
| acrA-05        | C6     |    | 29.65 | 91.14      | 1.95                   |
| acrB-01        | C6     |    |       |            | NoAmplification        |
| acrF           | C6     |    | 27.07 | 83.12      | 1.79 MultipleMeltPeaks |
| acrR-01        | C6     |    | 35.17 | 81.07      | 1.87 MultipleMeltPeaks |
| acrR-02        | C6     |    | 38.41 | 79.14      | 1.76 MultipleMeltPeaks |
| Actin          | C6     |    | 21.01 | 86.81      | 1.97                   |
| adeA           | C6     |    | 34.92 | 88.07      | 1.9                    |
| ampC-01        | C6     |    | 30.1  | 85.64      | 2                      |
| ampC-02        | C6     |    |       |            | NoAmplification        |
| ampC-04        | C6     |    | 30.5  | 78.99      | 1.89                   |
| ampC-05        | C6     |    |       |            | NoAmplification        |
| ampC-06        | C6     |    | 33.56 | 84.06      | 1.95                   |
| ampC-07        | C6     |    | 33.1  | 82.65      | 1.89 MultipleMeltPeaks |
| ampC-09        | C6     |    | 33.02 | 76.51      | 1.95                   |
| ampC/blaDH     | C6     |    | 32.63 | 79.7       | 1.87                   |

|                          |    |       |       |      |                          |
|--------------------------|----|-------|-------|------|--------------------------|
| aph                      | C6 |       |       |      | NoAmplification          |
| aph(2')-Id-01            | C6 |       |       |      | NoAmplification          |
| aph(2')-Id-02            | C6 |       |       |      | NoAmplification          |
| aph6ia                   | C6 | 35.48 | 75.65 | 1.9  | MultipleMeltPeaks        |
| aphA1(aka k <sub>z</sub> | C6 |       |       |      | NoAmplification          |
| bacA-01                  | C6 | 37.13 | 76.94 | 1.88 |                          |
| bacA-02                  | C6 | 33.75 | 87.69 | 1.8  |                          |
| BETA-globin              | C6 | 21.87 | 84.22 | 1.97 |                          |
| bla-ACC-1                | C6 | 34.38 | 79.82 | 1.89 | MultipleMeltPeaks        |
| bla-L1                   | C6 | 31.12 | 83.56 | 1.93 |                          |
| bla1                     | C6 |       |       |      | NoAmplification          |
| blaCMY                   | C6 |       |       |      | CurveFitFailed           |
| blaCMY2-01               | C6 | 38.54 | 83.64 | 1.82 |                          |
| blaCMY2-02               | C6 | 28.12 | 85.12 | 1.98 | MultipleMeltPeaks        |
| blaCTX-M-01              | C6 |       |       |      | NoAmplification          |
| blaCTX-M-02              | C6 | 32.58 | 80.19 | 1.9  |                          |
| blaCTX-M-03              | C6 |       |       |      | NoAmplification          |
| blaCTX-M-04              | C6 | 36.5  | 87.81 | 1.85 |                          |
| blaCTX-M-05              | C6 | 33.22 | 76.65 | 1.8  |                          |
| blaCTX-M-06              | C6 |       |       |      | NoAmplification          |
| blaGES                   | C6 |       |       |      | NoAmplification          |
| blaIMP-01                | C6 |       |       |      | NoAmplification          |
| blaIMP-02                | C6 |       |       |      | NoAmplification          |
| blaMOX/blaC              | C6 | 36.01 | 82.24 | 1.92 |                          |
| blaOCH                   | C6 |       |       |      | NoAmplification          |
| blaOKP                   | C6 |       |       |      | NoAmplification          |
| blaOXA1/blaC             | C6 |       |       |      | NoAmplification          |
| blaOXA10-01              | C6 |       |       |      | NoAmplification          |
| blaOXA10-02              | C6 |       |       |      | NoAmplification          |
| blaOXY                   | C6 | 38.98 | 64.76 | 1.6  | MultipleMeltPeaks        |
| blaPAO                   | C6 |       |       |      | NoAmplification          |
| blaPER                   | C6 |       |       |      | NoAmplification          |
| blaPSE                   | C6 |       |       |      | NoAmplification          |
| blaROB                   | C6 |       |       |      | NoAmplification          |
| blaSFO                   | C6 | 29.25 | 80.62 | 1.97 | MultipleMeltPeaks        |
| blaSHV-01                | C6 | 35.41 | 73.23 | 1.76 | MultipleMeltPeaks        |
| blaSHV-02                | C6 | 41.05 | 62.11 | 1.53 | BadR2, MultipleMeltPeaks |
| blaTEM                   | C6 | 36.63 | 83.7  | 1.85 | MultipleMeltPeaks        |
| blaTLA                   | C6 |       |       |      | NoAmplification          |
| blaVEB                   | C6 |       |       |      | NoAmplification          |
| blaVIM                   | C6 |       |       |      | NoAmplification          |
| blaZ                     | C6 |       |       |      | NoAmplification          |
| carB                     | C6 |       |       |      | NoAmplification          |
| catA1                    | C6 |       |       |      | NoAmplification          |
| catB3                    | C6 | 40.24 | 79.99 | 1.72 | MultipleMeltPeaks        |
| catB8                    | C6 | 29.55 | 81.57 | 2.01 |                          |

|            |    |       |       |      |                              |
|------------|----|-------|-------|------|------------------------------|
| ceoA       | C6 | 27.33 | 82.49 | 1.98 |                              |
| cepA       | C6 |       |       |      | NoAmplification              |
| cfiA       | C6 | 32.93 | 88.64 | 1.94 |                              |
| cfr        | C6 |       |       |      | NoAmplification              |
| cfxA       | C6 | 24.64 | 77.57 | 2.04 |                              |
| cmeA       | C6 | 34.69 | 84.91 | 1.85 |                              |
| cmlA1-01   | C6 | 31.53 | 86.6  | 1.93 |                              |
| cmlA1-02   | C6 |       |       |      | NoAmplification              |
| cmr        | C6 | 37.97 | 78.64 | 1.73 | MultipleMeltPeaks            |
| cmx(A)     | C6 | 25.54 | 84.46 | 1.99 |                              |
| cphA-01    | C6 | 30.32 | 85.66 | 1.95 |                              |
| cphA-02    | C6 | 33.09 | 82.52 | 1.99 |                              |
| dfrA1      | C6 | 33.2  | 78.55 | 2.01 |                              |
| dfrA12     | C6 | 35.71 | 82.66 | 1.89 |                              |
| emrD       | C6 | 35.07 | 88.32 | 1.83 |                              |
| ereA       | C6 | 38.73 | 82.75 | 1.8  | MultipleMeltPeaks            |
| ereB       | C6 | 34.89 | 85.59 | 1.92 | MultipleMeltPeaks            |
| erm(34)    | C6 |       |       |      | NoAmplification              |
| erm(35)    | C6 |       |       |      | NoAmplification              |
| erm(36)    | C6 | 31.3  | 84.25 | 2.08 |                              |
| ermA       | C6 |       |       |      | NoAmplification              |
| ermA/ermTR | C6 |       |       |      | NoAmplification              |
| ermB       | C6 |       |       |      | NoAmplification              |
| ermC       | C6 |       |       |      | NoAmplification              |
| ermF       | C6 |       |       |      | NoAmplification              |
| ermJ/ermD  | C6 |       |       |      | NoAmplification              |
| ermK-01    | C6 | 34.67 | 89.04 | 1.88 |                              |
| ermK-02    | C6 | 32.57 | 86.19 | 1.89 |                              |
| ermT-01    | C6 |       |       |      | NoAmplification              |
| ermT-02    | C6 |       |       |      | NoAmplification              |
| ermX       | C6 | 26.66 | 84.06 | 1.88 |                              |
| ermY       | C6 |       |       |      | NoAmplification              |
| fabK       | C6 | 25.71 | 79.36 | 2.11 |                              |
| floR       | C6 |       |       |      | NoAmplification              |
| folA       | C6 |       |       |      | NoAmplification              |
| fosB       | C6 |       |       |      | LowEfficiency, CtIsSmall, S: |
| fosX       | C6 |       |       |      | NoAmplification              |
| fox5       | C6 | 26.94 | 86.6  | 1.98 |                              |
| imiR       | C6 |       |       |      | NoAmplification              |
| ImrA-01    | C6 | 33.64 | 78.69 | 2.07 |                              |
| intl       | C6 | 31.73 | 84.91 | 1.91 |                              |
| intl1      | C6 | 21.68 | 87.12 | 1.97 | MultipleMeltPeaks            |
| IS613      | C6 | 24.49 | 79.56 | 1.95 |                              |
| lnuA-01    | C6 |       |       |      | NoAmplification              |
| lnuB-01    | C6 |       |       |      | NoAmplification              |
| lnuB-02    | C6 |       |       |      | NoAmplification              |

|               |    |       |       |      |                   |
|---------------|----|-------|-------|------|-------------------|
| lnuC          | C6 | 36.64 | 81.01 | 1.75 | MultipleMeltPeaks |
| marR-01       | C6 | 33.04 | 85.42 | 1.99 |                   |
| matA/mel      | C6 | 25.88 | 77.23 | 2.04 | MultipleMeltPeaks |
| mdetI1        | C6 |       |       |      | NoAmplification   |
| mdtA          | C6 | 37.18 | 82.37 | 1.85 |                   |
| mdtE/yhiU     | C6 |       |       |      | NoAmplification   |
| mecA          | C6 |       |       |      | NoAmplification   |
| mefA          | C6 | 24.81 | 80.65 | 1.98 |                   |
| mepA          | C6 | 33    | 77.41 | 1.97 | MultipleMeltPeaks |
| mexA          | C6 |       |       |      | NoAmplification   |
| mexD          | C6 | 33.78 | 80.2  | 2.04 |                   |
| mexE          | C6 |       |       |      | NoAmplification   |
| mexF          | C6 | 28.54 | 87.31 | 2.1  | MultipleMeltPeaks |
| mphA-01       | C6 | 31.12 | 86.72 | 1.98 | MultipleMeltPeaks |
| mphA-02       | C6 | 33.58 | 76.59 | 1.52 | MultipleMeltPeaks |
| mphB          | C6 | 37.57 | 82.84 | 1.79 |                   |
| mphC          | C6 | 36.69 | 77.72 | 1.83 | MultipleMeltPeaks |
| msrA-01       | C6 |       |       |      | NoAmplification   |
| msrC-01       | C6 |       |       |      | NoAmplification   |
| mtrC-01       | C6 | 37.48 | 83.19 | 1.77 | MultipleMeltPeaks |
| mtrC-02       | C6 | 29.42 | 84.38 | 1.98 |                   |
| mtrD-02       | C6 | 27.5  | 82.35 | 1.94 | MultipleMeltPeaks |
| mtrD-03       | C6 | 38.31 | 85.15 | 1.76 | MultipleMeltPeaks |
| NDM1          | C6 | 36.96 | 87.01 | 1.71 |                   |
| nimE          | C6 | 37.62 | 74.93 | 2.05 |                   |
| nisB          | C6 |       |       |      | NoAmplification   |
| oleC          | C6 | 37.64 | 86.05 | 1.97 | MultipleMeltPeaks |
| oprD          | C6 | 27.65 | 83.71 | 1.98 | MultipleMeltPeaks |
| oprJ          | C6 | 33.86 | 87.17 | 1.82 | MultipleMeltPeaks |
| pbp           | C6 |       |       |      | NoAmplification   |
| pbp2x         | C6 |       |       |      | NoAmplification   |
| Pbp5          | C6 |       |       |      | NoAmplification   |
| penA          | C6 |       |       |      | NoAmplification   |
| pikR1         | C6 | 36.04 | 86.04 | 1.84 | MultipleMeltPeaks |
| pikR2         | C6 | 30.32 | 84.76 | 2.04 |                   |
| pmrA          | C6 | 25.6  | 78.79 | 2.15 |                   |
| pncA          | C6 | 32.22 | 89.08 | 1.97 |                   |
| putative mult | C6 | 37.83 | 77.31 | 1.86 | MultipleMeltPeaks |
| qac           | C6 | 37.65 | 72.19 | 1.9  | MultipleMeltPeaks |
| qacA          | C6 |       |       |      | NoAmplification   |
| qacA/qacB     | C6 | 39.2  | 68.73 | 1.43 | MultipleMeltPeaks |
| qacEdelta1-0  | C6 |       |       |      | NoAmplification   |
| qacEdelta1-0  | C6 | 35.11 | 76.16 | 2.01 |                   |
| qacH-01       | C6 | 32.75 | 86.94 | 1.98 | MultipleMeltPeaks |
| qacH-02       | C6 | 38.27 | 83.87 | 1.56 |                   |
| qnrA          | C6 | 38.23 | 81.26 | 1.89 | MultipleMeltPeaks |

|              |    |       |       |      |                   |
|--------------|----|-------|-------|------|-------------------|
| rarD-02      | C6 | 37.27 | 85.82 | 1.84 |                   |
| sat4         | C6 |       |       |      | NoAmplification   |
| sdeB         | C6 | 37    | 72.33 | 1.95 |                   |
| spcN-01      | C6 |       |       |      | NoAmplification   |
| speA         | C6 |       |       |      | NoAmplification   |
| str          | C6 |       |       |      | NoAmplification   |
| strA         | C6 |       |       |      | NoAmplification   |
| strB         | C6 | 35.58 | 78.92 | 1.95 |                   |
| sul1         | C6 | 35.53 | 90.05 | 1.82 | MultipleMeltPeaks |
| sul2         | C6 | 37.74 | 82.68 | 1.85 | MultipleMeltPeaks |
| sulA/foIP-01 | C6 | 23.49 | 81.55 | 2.03 |                   |
| sulA/foIP-03 | C6 | 23.51 | 83.6  | 2.02 |                   |
| tet(32)      | C6 |       |       |      | NoAmplification   |
| tet(34)      | C6 | 32.72 | 75.36 | 1.98 |                   |
| tet(35)      | C6 |       |       |      | NoAmplification   |
| tet(36)-A    | C6 |       |       |      | NoAmplification   |
| tet(36)-B    | C6 |       |       |      | NoAmplification   |
| tet(37)      | C6 | 27.9  | 76.28 | 1.97 |                   |
| tetA-01      | C6 | 30.59 | 85.13 | 1.92 |                   |
| tetA-02      | C6 | 34.75 | 89.85 | 1.92 |                   |
| tetB-01      | C6 | 29.9  | 86.35 | 1.95 | MultipleMeltPeaks |
| tetB-02      | C6 |       |       |      | NoAmplification   |
| tetC-01      | C6 |       |       |      | NoAmplification   |
| tetC-02      | C6 |       |       |      | NoAmplification   |
| tetD-01      | C6 |       |       |      | NoAmplification   |
| tetD-02      | C6 | 32.23 | 77.79 | 1.96 |                   |
| tetE         | C6 |       |       |      | NoAmplification   |
| tetG-01      | C6 | 33.49 | 82.28 | 1.99 | MultipleMeltPeaks |
| tetG-02      | C6 | 37.22 | 84.49 | 1.82 | MultipleMeltPeaks |
| tetH         | C6 |       |       |      | NoAmplification   |
| tetJ         | C6 | 35.08 | 80.12 | 1.94 |                   |
| tetK         | C6 |       |       |      | NoAmplification   |
| tetL-01      | C6 | 40.8  | 79.77 | 1.64 | MultipleMeltPeaks |
| tetL-02      | C6 | 30.37 | 85.28 | 1.84 |                   |
| tetM-01      | C6 | 25.34 | 76.02 | 2.03 |                   |
| tetM-02      | C6 | 25.14 | 77.48 | 2.05 |                   |
| tetO-01      | C6 |       |       |      | NoAmplification   |
| tetPA        | C6 |       |       |      | NoAmplification   |
| tetPB-01     | C6 |       |       |      | NoAmplification   |
| tetPB-02     | C6 | 28.66 | 85.13 | 2.11 |                   |
| tetPB-03     | C6 |       |       |      | NoAmplification   |
| tetPB-05     | C6 |       |       |      | NoAmplification   |
| tetQ         | C6 | 26.17 | 75.95 | 2.03 |                   |
| tetR-02      | C6 | 31.78 | 89.11 | 1.85 |                   |
| tetR-03      | C6 | 28.35 | 76.04 | 2    |                   |
| tetS         | C6 | 35.12 | 85.25 | 2.09 |                   |

|             |    |       |       |      |                            |
|-------------|----|-------|-------|------|----------------------------|
| tetT        | C6 |       |       |      | NoAmplification            |
| tetU-01     | C6 |       |       |      | NoAmplification            |
| tetV        | C6 |       |       |      | NoAmplification            |
| tetW-01     | C6 | 36.01 | 64.32 | 1.97 | SaturationBaselineRatiolsL |
| tetX        | C6 | 40.14 | 81.83 | 1.74 |                            |
| tnpA-01     | C6 |       |       |      | NoAmplification            |
| tnpA-02     | C6 | 33.21 | 85.36 | 1.8  |                            |
| tnpA-03     | C6 | 35.49 | 75.17 | 2.11 |                            |
| tnpA-04     | C6 | 40.37 | 78.47 | 1.76 |                            |
| tnpA-05     | C6 |       |       |      | NoAmplification            |
| tnpA-07     | C6 |       |       |      | NoAmplification            |
| tolC-01     | C6 | 38.67 | 80.4  | 1.74 |                            |
| tolC-02     | C6 | 31.11 | 83.59 | 1.95 | MultipleMeltPeaks          |
| tolC-03     | C6 | 31.13 | 87.2  | 1.95 | MultipleMeltPeaks          |
| Tp614       | C6 | 37.44 | 82.55 | 1.82 | MultipleMeltPeaks          |
| ttgA        | C6 |       |       |      | NoAmplification            |
| ttgB        | C6 | 37.31 | 79.11 | 1.82 | MultipleMeltPeaks          |
| vanA        | C6 |       |       |      | NoAmplification            |
| vanB-01     | C6 | 32.78 | 83.81 | 1.98 |                            |
| vanC-01     | C6 |       |       |      | NoAmplification            |
| vanC-02     | C6 |       |       |      | NoAmplification            |
| vanC-03     | C6 | 28.68 | 85.88 | 1.91 |                            |
| vanC1       | C6 |       |       |      | NoAmplification            |
| vanC2/vanC3 | C6 | 36.69 | 78.73 | 1.79 | MultipleMeltPeaks          |
| vanG        | C6 |       |       |      | NoAmplification            |
| vanHB       | C6 | 31.97 | 79.19 | 1.96 |                            |
| vanHD       | C6 | 33.26 | 82.84 | 1.98 |                            |
| vanRA-01    | C6 |       |       |      | NoAmplification            |
| vanRA-02    | C6 |       |       |      | NoAmplification            |
| vanRB       | C6 | 33.6  | 87.6  | 2    |                            |
| vanRC       | C6 |       |       |      | NoAmplification            |
| vanRC4      | C6 |       |       |      | NoAmplification            |
| vanRD       | C6 |       |       |      | NoAmplification            |
| vanSA       | C6 |       |       |      | NoAmplification            |
| vanSB       | C6 | 29.88 | 74.65 | 2.07 |                            |
| vanSC-01    | C6 | 36.19 | 84.19 | 1.9  |                            |
| vanSC-02    | C6 |       |       |      | NoAmplification            |
| vanTC-01    | C6 |       |       |      | NoAmplification            |
| vanTC-02    | C6 |       |       |      | NoAmplification            |
| vanTE       | C6 |       |       |      | NoAmplification            |
| vanTG       | C6 |       |       |      | NoAmplification            |
| vanWB       | C6 |       |       |      | NoAmplification            |
| vanWG       | C6 |       |       |      | NoAmplification            |
| vanXA       | C6 | 37.81 | 77.33 | 1.88 | MultipleMeltPeaks          |
| vanXB       | C6 |       |       |      | NoAmplification            |
| vanXD       | C6 | 31.86 | 75.34 | 2    |                            |



|              |    |       |       |                              |
|--------------|----|-------|-------|------------------------------|
| vanYB        | C6 |       |       | NoAmplification              |
| vanYD-01     | C6 | 32.99 | 81.79 | 1.75                         |
| vanYD-02     | C6 |       |       | NoAmplification              |
| vatB-01      | C6 |       |       | NoAmplification              |
| vatB-02      | C6 | 39.27 | 62.24 | 1.7 BadR2, MultipleMeltPeaks |
| vatC-01      | C6 | 34.27 | 81.29 | 1.9                          |
| vatC-02      | C6 | 36.94 | 83.21 | 1.84 MultipleMeltPeaks       |
| vatE-01      | C6 | 29.58 | 76.72 | 2.09                         |
| vatE-02      | C6 |       |       | NoAmplification              |
| vgaA-01      | C6 |       |       | NoAmplification              |
| vgaA-02      | C6 | 37.34 | 79.94 | 1.88                         |
| vgb-01       | C6 |       |       | NoAmplification              |
| vgbB-01      | C6 |       |       | NoAmplification              |
| vgbB-02      | C6 |       |       | NoAmplification              |
| yceE/mdtG-0  | C6 |       |       | NoAmplification              |
| yceE/mdtG-0  | C6 | 37.11 | 81.15 | 1.87                         |
| yceL/mdtH-0  | C6 | 31.72 | 87.58 | 1.95 MultipleMeltPeaks       |
| yceL/mdtH-0  | C6 |       |       | NoAmplification              |
| yceL/mdtH-0  | C6 | 38.05 | 74.06 | 1.92 MultipleMeltPeaks       |
| yidY/mdtL-01 | C6 | 31.67 | 88.82 | 1.95                         |
| yidY/mdtL-02 | C6 | 42.53 | 76.65 | 1.66                         |

| Assay          | Sample | Ct | Tm    | Efficiency | Flags                        |
|----------------|--------|----|-------|------------|------------------------------|
| 16S rRNA       | C8     |    | 17.15 | 82.21      | 2.01                         |
| aac            | C8     |    | 29.95 | 83.13      | 1.69 MultipleMeltPeaks       |
| aac(6')-Ib(akz | C8     |    |       |            | CurveFitFailed               |
| aac(6')-Ib(akz | C8     |    | 33.82 | 85.58      | 1.99 MultipleMeltPeaks       |
| aac(6')-Ib(akz | C8     |    | 33.45 | 78.67      | 1.98 MultipleMeltPeaks       |
| aac(6')-II     | C8     |    | 35.55 | 81.12      | 1.69 MultipleMeltPeaks       |
| aac(6')I1      | C8     |    | 37.13 | 88.47      | 1.83                         |
| aacA/aphD      | C8     |    |       |            | LowEfficiency, CtIsSmall, S: |
| aacC           | C8     |    | 30.94 | 85.83      | 1.97 MultipleMeltPeaks       |
| aacC1          | C8     |    | 36.92 | 84.03      | 1.99                         |
| aacC2          | C8     |    | 36.88 | 81.8       | 1.94                         |
| aacC4          | C8     |    | 31.09 | 89.79      | 1.96 MultipleMeltPeaks       |
| aadA-01        | C8     |    |       |            | CurveFitFailed               |
| aadA-02        | C8     |    | 32.56 | 80.45      | 1.99                         |
| aadA-1-01      | C8     |    | 36.81 | 80.72      | 2.08                         |
| aadA-1-02      | C8     |    |       |            | LowEfficiency, CtIsSmall, S: |
| aadA1          | C8     |    | 32.23 | 84.21      | 2.01                         |
| aadA2-01       | C8     |    |       |            | CurveFitFailed               |
| aadA2-02       | C8     |    | 33.19 | 75.41      | 2.04                         |
| aadA2-03       | C8     |    |       |            | LowEfficiency, CtIsSmall, S: |
| aadA5-01       | C8     |    | 37.08 | 81.42      | 1.87 MultipleMeltPeaks       |
| aadA5-02       | C8     |    | 34.86 | 83.94      | 1.96                         |
| aadA9-01       | C8     |    | 30.61 | 89.55      | 1.89                         |
| aadA9-02       | C8     |    |       |            | CurveFitFailed               |
| aadD           | C8     |    |       |            | LowEfficiency, CtIsSmall, S: |
| aadE           | C8     |    |       |            | LowEfficiency, CtIsSmall, S: |
| acrA-01        | C8     |    | 31.69 | 88.86      | 1.97                         |
| acrA-02        | C8     |    |       |            | CurveFitFailed               |
| acrA-03        | C8     |    | 36.38 | 90.26      | 1.79 MultipleMeltPeaks       |
| acrA-04        | C8     |    | 28.63 | 89.51      | 2.01                         |
| acrA-05        | C8     |    | 31.15 | 85.29      | 1.95                         |
| acrB-01        | C8     |    |       |            | NoAmplification              |
| acrF           | C8     |    | 31.34 | 82.12      | 1.92                         |
| acrR-01        | C8     |    | 37.15 | 81.27      | 1.91                         |
| acrR-02        | C8     |    |       |            | CurveFitFailed               |
| Actin          | C8     |    | 21.39 | 86.91      | 1.96                         |
| adeA           | C8     |    | 36.64 | 88.06      | 1.91                         |
| ampC-01        | C8     |    | 32.42 | 87.52      | 2.01 MultipleMeltPeaks       |
| ampC-02        | C8     |    | 33.76 | 89.61      | 1.93                         |
| ampC-04        | C8     |    | 32.36 | 78.6       | 1.84                         |
| ampC-05        | C8     |    |       |            | LowEfficiency, CtIsSmall, S: |
| ampC-06        | C8     |    |       |            | LowEfficiency, CtIsSmall, S: |
| ampC-07        | C8     |    | 36.94 | 82.75      | 1.83 MultipleMeltPeaks       |
| ampC-09        | C8     |    |       |            | CurveFitFailed               |
| ampC/blaDH     | C8     |    | 31.27 | 81.64      | 2 MultipleMeltPeaks          |

|                          |    |       |       |      |                              |
|--------------------------|----|-------|-------|------|------------------------------|
| aph                      | C8 |       |       |      | LowEfficiency, CtIsSmall, S: |
| aph(2')-Id-01            | C8 |       |       |      | LowEfficiency, CtIsSmall, S: |
| aph(2')-Id-02            | C8 |       |       |      | LowEfficiency, CtIsSmall, S: |
| aph6ia                   | C8 | 29.95 | 78.79 | 1.94 |                              |
| aphA1(aka k <sub>z</sub> | C8 |       |       |      | LowEfficiency, CtIsSmall, C: |
| bacA-01                  | C8 | 35.1  | 77.95 | 2    |                              |
| bacA-02                  | C8 | 34.51 | 87.89 | 1.77 | MultipleMeltPeaks            |
| BETA-globin              | C8 | 22.42 | 84.07 | 1.98 |                              |
| bla-ACC-1                | C8 | 34.92 | 73.67 | 1.94 |                              |
| bla-L1                   | C8 | 29.6  | 83.54 | 2.01 |                              |
| bla1                     | C8 |       |       |      | LowEfficiency, CtIsSmall, S: |
| blaCMY                   | C8 |       |       |      | CurveFitFailed               |
| blaCMY2-01               | C8 |       |       |      | CurveFitFailed               |
| blaCMY2-02               | C8 | 28.72 | 85.93 | 2.05 |                              |
| blaCTX-M-01              | C8 | 35.54 | 86.5  | 1.91 |                              |
| blaCTX-M-02              | C8 | 33.41 | 88.9  | 1.91 | MultipleMeltPeaks            |
| blaCTX-M-03              | C8 |       |       |      | CurveFitFailed               |
| blaCTX-M-04              | C8 | 32.31 | 87.13 | 2.03 | MultipleMeltPeaks            |
| blaCTX-M-05              | C8 | 32.17 | 76.4  | 1.84 |                              |
| blaCTX-M-06              | C8 |       |       |      | NoAmplification              |
| blaGES                   | C8 |       |       |      | CurveFitFailed               |
| blaIMP-01                | C8 |       |       |      | LowEfficiency, CtIsSmall, C: |
| blaIMP-02                | C8 |       |       |      | LowEfficiency, CtIsSmall, S: |
| blaMOX/blaC              | C8 | 37.06 | 82.31 | 2.17 |                              |
| blaOCH                   | C8 |       |       |      | NoAmplification              |
| blaOKP                   | C8 |       |       |      | NoAmplification              |
| blaOXA1/blaC             | C8 |       |       |      | LowEfficiency, CtIsSmall, S: |
| blaOXA10-01              | C8 |       |       |      | CurveFitFailed               |
| blaOXA10-02              | C8 |       |       |      | LowEfficiency, CtIsSmall, S: |
| blaOXY                   | C8 | 36.77 | 88.71 | 1.79 |                              |
| blaPAO                   | C8 |       |       |      | CurveFitFailed               |
| blaPER                   | C8 |       |       |      | LowEfficiency, CtIsSmall, S: |
| blaPSE                   | C8 |       |       |      | NoAmplification              |
| blaROB                   | C8 |       |       |      | CurveFitFailed               |
| blaSFO                   | C8 | 31.47 | 83.55 | 1.95 | MultipleMeltPeaks            |
| blaSHV-01                | C8 | 34.22 | 89    | 1.81 |                              |
| blaSHV-02                | C8 |       |       |      | LowEfficiency, CtIsSmall, S: |
| blaTEM                   | C8 | 34.58 | 84.03 | 2.1  |                              |
| blaTLA                   | C8 |       |       |      | LowEfficiency, CtIsSmall, S: |
| blaVEB                   | C8 |       |       |      | LowEfficiency, CtIsSmall, S: |
| blaVIM                   | C8 |       |       |      | NoAmplification              |
| blaZ                     | C8 |       |       |      | LowEfficiency, CtIsSmall, S: |
| carB                     | C8 | 35.33 | 89.9  | 1.91 |                              |
| catA1                    | C8 |       |       |      | NoAmplification              |
| catB3                    | C8 | 31.5  | 87.52 | 2    |                              |
| catB8                    | C8 | 28.93 | 82.41 | 2    |                              |

|            |    |       |       |      |                              |
|------------|----|-------|-------|------|------------------------------|
| ceoA       | C8 | 30.61 | 82.08 | 1.96 | MultipleMeltPeaks            |
| cepA       | C8 |       |       |      | LowEfficiency, CtIsSmall, S: |
| cfiA       | C8 | 32.42 | 88.69 | 1.97 | MultipleMeltPeaks            |
| cfr        | C8 |       |       |      | LowEfficiency, CtIsSmall, C: |
| cfxA       | C8 | 24.92 | 77.57 | 2.04 |                              |
| cmeA       | C8 |       |       |      | CurveFitFailed               |
| cmlA1-01   | C8 | 37.25 | 87.57 | 1.8  |                              |
| cmlA1-02   | C8 | 37.02 | 88.25 | 1.81 |                              |
| cmr        | C8 |       |       |      | CurveFitFailed               |
| cmx(A)     | C8 | 26.07 | 86.4  | 1.97 |                              |
| cphA-01    | C8 | 32.75 | 85.51 | 1.99 |                              |
| cphA-02    | C8 | 33.89 | 82.63 | 2.02 |                              |
| dfrA1      | C8 |       |       |      | NoAmplification              |
| dfrA12     | C8 | 37.42 | 88.25 | 1.86 |                              |
| emrD       | C8 | 35.79 | 88.97 | 1.81 |                              |
| ereA       | C8 | 37.01 | 81.97 | 1.89 |                              |
| ereB       | C8 | 33.44 | 87.82 | 1.97 |                              |
| erm(34)    | C8 | 37.01 | 83.48 | 2.17 | MultipleMeltPeaks            |
| erm(35)    | C8 |       |       |      | LowEfficiency, CtIsSmall, C: |
| erm(36)    | C8 | 36.83 | 85.96 | 2.06 | MultipleMeltPeaks            |
| ermA       | C8 |       |       |      | LowEfficiency, CtIsSmall, S: |
| ermA/ermTR | C8 |       |       |      | NoAmplification              |
| ermB       | C8 | 28.22 | 75.08 | 2.1  |                              |
| ermC       | C8 |       |       |      | LowEfficiency, CtIsSmall, S: |
| ermF       | C8 | 27.31 | 74.57 | 2.01 |                              |
| ermJ/ermD  | C8 |       |       |      | CurveFitFailed               |
| ermK-01    | C8 |       |       |      | LowEfficiency, CtIsSmall, S: |
| ermK-02    | C8 | 36.15 | 82.32 | 1.82 |                              |
| ermT-01    | C8 |       |       |      | LowEfficiency, CtIsSmall, S: |
| ermT-02    | C8 | 37.99 | 74.36 | 1.93 |                              |
| ermX       | C8 | 37.53 | 85.42 | 1.7  |                              |
| ermY       | C8 |       |       |      | LowEfficiency, CtIsSmall, S: |
| fabK       | C8 | 22.84 | 78.92 | 2.17 |                              |
| floR       | C8 | 34.85 | 89.48 | 1.83 |                              |
| folA       | C8 |       |       |      | NoAmplification              |
| fosB       | C8 |       |       |      | LowEfficiency, CtIsSmall, S: |
| fosX       | C8 |       |       |      | LowEfficiency, CtIsSmall, S: |
| fox5       | C8 | 27.66 | 86.83 | 1.99 |                              |
| imiR       | C8 |       |       |      | LowEfficiency, CtIsSmall, C: |
| ImrA-01    | C8 |       |       |      | CurveFitFailed               |
| intl       | C8 | 30.12 | 84.74 | 1.96 |                              |
| intl1      | C8 | 21.77 | 87.07 | 2    | MultipleMeltPeaks            |
| IS613      | C8 | 28.09 | 79.83 | 2.01 |                              |
| lnuA-01    | C8 |       |       |      | LowEfficiency, CtIsSmall, S: |
| lnuB-01    | C8 |       |       |      | LowEfficiency, CtIsSmall, S: |
| lnuB-02    | C8 |       |       |      | CurveFitFailed               |

|               |    |       |       |      |                              |
|---------------|----|-------|-------|------|------------------------------|
| lnuC          | C8 |       |       |      | CurveFitFailed               |
| marR-01       | C8 | 32.28 | 83.22 | 1.96 |                              |
| matA/mel      | C8 | 21.3  | 77.64 | 2.06 |                              |
| mdet1         | C8 |       |       |      | LowEfficiency, CtIsSmall, Ci |
| mdtA          | C8 |       |       |      | CurveFitFailed               |
| mdtE/yhiU     | C8 | 32.8  | 86.87 | 1.92 |                              |
| mecA          | C8 |       |       |      | LowEfficiency, CtIsSmall, S: |
| mefA          | C8 | 20.82 | 80.48 | 1.98 |                              |
| mepA          | C8 | 32.78 | 84.76 | 1.93 | MultipleMeltPeaks            |
| mexA          | C8 |       |       |      | BadR2, LowEfficiency, CtIsS  |
| mexD          | C8 | 31.32 | 82.34 | 1.94 | MultipleMeltPeaks            |
| mexE          | C8 | 37.78 | 87.55 | 1.86 | MultipleMeltPeaks            |
| mexF          | C8 | 28.08 | 87.52 | 1.98 |                              |
| mphA-01       | C8 | 31.25 | 86.27 | 1.91 | MultipleMeltPeaks            |
| mphA-02       | C8 | 31.91 | 76.91 | 1.73 | MultipleMeltPeaks            |
| mphB          | C8 |       |       |      | CurveFitFailed               |
| mphC          | C8 |       |       |      | LowEfficiency, CtIsSmall, S: |
| msrA-01       | C8 |       |       |      | LowEfficiency, CtIsSmall, Ci |
| msrC-01       | C8 |       |       |      | NoAmplification              |
| mtrC-01       | C8 |       |       |      | CurveFitFailed               |
| mtrC-02       | C8 | 35.74 | 84.41 | 1.97 | MultipleMeltPeaks            |
| mtrD-02       | C8 | 26.52 | 85.26 | 1.99 |                              |
| mtrD-03       | C8 | 32.38 | 81.39 | 1.87 |                              |
| NDM1          | C8 |       |       |      | CurveFitFailed               |
| nimE          | C8 | 33.57 | 76.02 | 2.02 |                              |
| nisB          | C8 |       |       |      | LowEfficiency, CtIsSmall, Ci |
| oleC          | C8 | 35.26 | 84.3  | 1.93 |                              |
| oprD          | C8 | 27.44 | 86.79 | 1.99 | MultipleMeltPeaks            |
| oprJ          | C8 | 34.2  | 90.38 | 2.03 |                              |
| pbp           | C8 |       |       |      | CurveFitFailed               |
| pbp2x         | C8 | 27.02 | 75.43 | 1.81 |                              |
| Pbp5          | C8 |       |       |      | LowEfficiency, CtIsSmall, S: |
| penA          | C8 |       |       |      | NoAmplification              |
| pikR1         | C8 |       |       |      | LowEfficiency, CtIsSmall, S: |
| pikR2         | C8 | 29.84 | 84.5  | 2.09 |                              |
| pmrA          | C8 | 23.49 | 79.01 | 2.13 |                              |
| pncA          | C8 | 25.64 | 89.64 | 1.96 |                              |
| putative mul1 | C8 |       |       |      | CurveFitFailed               |
| qac           | C8 |       |       |      | LowEfficiency, CtIsSmall, S: |
| qacA          | C8 |       |       |      | CurveFitFailed               |
| qacA/qacB     | C8 |       |       |      | CurveFitFailed               |
| qacEdelta1-0  | C8 |       |       |      | LowEfficiency, CtIsSmall, S: |
| qacEdelta1-0  | C8 | 35.15 | 82.24 | 1.96 |                              |
| qacH-01       | C8 | 31.18 | 83.91 | 1.93 |                              |
| qacH-02       | C8 | 35.7  | 78.88 | 1.83 | MultipleMeltPeaks            |
| qnrA          | C8 |       |       |      | CurveFitFailed               |

|              |    |       |       |      |                              |
|--------------|----|-------|-------|------|------------------------------|
| rarD-02      | C8 |       |       |      | NoAmplification              |
| sat4         | C8 |       |       |      | LowEfficiency, CtIsSmall, S: |
| sdeB         | C8 | 36.43 | 79.96 | 1.88 |                              |
| spcN-01      | C8 | 37.92 | 89.99 | 1.84 | MultipleMeltPeaks            |
| speA         | C8 |       |       |      | NoAmplification              |
| str          | C8 |       |       |      | CurveFitFailed               |
| strA         | C8 |       |       |      | CurveFitFailed               |
| strB         | C8 | 36.63 | 78.83 | 1.94 |                              |
| sul1         | C8 |       |       |      | NoAmplification              |
| sul2         | C8 |       |       |      | LowEfficiency, CtIsSmall, S: |
| sulA/foIP-01 | C8 | 21.19 | 81.87 | 1.99 |                              |
| sulA/foIP-03 | C8 | 21.58 | 83.25 | 2.02 |                              |
| tet(32)      | C8 | 28.32 | 81.09 | 1.99 |                              |
| tet(34)      | C8 | 30.7  | 75.78 | 2    |                              |
| tet(35)      | C8 |       |       |      | NoAmplification              |
| tet(36)-A    | C8 | 34.04 | 88.15 | 1.91 |                              |
| tet(36)-B    | C8 |       |       |      | LowEfficiency, CtIsSmall, S: |
| tet(37)      | C8 | 33.57 | 78.53 | 1.98 | MultipleMeltPeaks            |
| tetA-01      | C8 | 30.16 | 85.11 | 1.95 |                              |
| tetA-02      | C8 | 37.21 | 88.05 | 1.93 |                              |
| tetB-01      | C8 | 33.63 | 85.98 | 2.02 |                              |
| tetB-02      | C8 | 32.78 | 83.48 | 1.96 |                              |
| tetC-01      | C8 |       |       |      | NoAmplification              |
| tetC-02      | C8 |       |       |      | CurveFitFailed               |
| tetD-01      | C8 |       |       |      | CurveFitFailed               |
| tetD-02      | C8 | 33.72 | 85.77 | 1.76 | MultipleMeltPeaks            |
| tetE         | C8 |       |       |      | LowEfficiency, CtIsSmall, S: |
| tetG-01      | C8 | 31.87 | 82.04 | 2    | MultipleMeltPeaks            |
| tetG-02      | C8 | 34.87 | 89.83 | 1.92 |                              |
| tetH         | C8 |       |       |      | CurveFitFailed               |
| tetJ         | C8 |       |       |      | LowEfficiency, CtIsSmall, S: |
| tetK         | C8 |       |       |      | CurveFitFailed               |
| tetL-01      | C8 |       |       |      | LowEfficiency, CtIsSmall, S: |
| tetL-02      | C8 | 31.42 | 85.29 | 1.83 |                              |
| tetM-01      | C8 | 22.25 | 76.13 | 2.01 |                              |
| tetM-02      | C8 | 22.31 | 77.59 | 2.05 |                              |
| tetO-01      | C8 | 27.84 | 76.81 | 2.07 |                              |
| tetPA        | C8 |       |       |      | CurveFitFailed               |
| tetPB-01     | C8 | 37.24 | 83.45 | 1.91 | MultipleMeltPeaks            |
| tetPB-02     | C8 | 29.02 | 85.15 | 2.09 |                              |
| tetPB-03     | C8 |       |       |      | LowEfficiency, CtIsSmall, S: |
| tetPB-05     | C8 |       |       |      | CurveFitFailed               |
| tetQ         | C8 | 24.43 | 77    | 2.1  |                              |
| tetR-02      | C8 | 32.61 | 88.05 | 1.89 | MultipleMeltPeaks            |
| tetR-03      | C8 |       |       |      | CurveFitFailed               |
| tetS         | C8 | 35.41 | 75.8  | 2.16 | MultipleMeltPeaks            |

|             |    |       |       |      |                                          |
|-------------|----|-------|-------|------|------------------------------------------|
| tetT        | C8 |       |       |      | CurveFitFailed                           |
| tetU-01     | C8 |       |       |      | LowEfficiency, CtIsSmall, S <sub>e</sub> |
| tetV        | C8 |       |       |      | LowEfficiency, CtIsSmall, S <sub>e</sub> |
| tetW-01     | C8 | 22.69 | 81.97 | 2.04 |                                          |
| tetX        | C8 | 36.82 | 81.95 | 2.02 |                                          |
| tnpA-01     | C8 | 32.3  | 83.09 | 1.95 |                                          |
| tnpA-02     | C8 | 35.08 | 84.75 | 1.75 |                                          |
| tnpA-03     | C8 | 32.16 | 75.13 | 2.1  |                                          |
| tnpA-04     | C8 |       |       |      | CurveFitFailed                           |
| tnpA-05     | C8 |       |       |      | CurveFitFailed                           |
| tnpA-07     | C8 |       |       |      | LowEfficiency, CtIsSmall, C <sub>i</sub> |
| tolC-01     | C8 |       |       |      | LowEfficiency, CtIsSmall, S <sub>e</sub> |
| tolC-02     | C8 | 30.84 | 84.78 | 1.97 | MultipleMeltPeaks                        |
| tolC-03     | C8 | 29.94 | 87.54 | 1.96 |                                          |
| Tp614       | C8 |       |       |      | CurveFitFailed                           |
| ttgA        | C8 | 37.35 | 87.29 | 1.84 |                                          |
| ttgB        | C8 | 36.92 | 87.98 | 1.89 | MultipleMeltPeaks                        |
| vanA        | C8 |       |       |      | NoAmplification                          |
| vanB-01     | C8 | 31.56 | 82.73 | 1.96 |                                          |
| vanC-01     | C8 |       |       |      | LowEfficiency, CtIsSmall, S <sub>e</sub> |
| vanC-02     | C8 |       |       |      | LowEfficiency, CtIsSmall, S <sub>e</sub> |
| vanC-03     | C8 | 30.26 | 86.2  | 1.93 |                                          |
| vanC1       | C8 |       |       |      | CurveFitFailed                           |
| vanC2/vanC3 | C8 | 37.98 | 77.45 | 1.82 | MultipleMeltPeaks                        |
| vanG        | C8 |       |       |      | CurveFitFailed                           |
| vanHB       | C8 | 35.91 | 86.86 | 1.86 | MultipleMeltPeaks                        |
| vanHD       | C8 | 35.59 | 78.32 | 1.93 |                                          |
| vanRA-01    | C8 |       |       |      | CurveFitFailed                           |
| vanRA-02    | C8 |       |       |      | LowEfficiency, CtIsSmall, C <sub>i</sub> |
| vanRB       | C8 | 33.18 | 81.68 | 1.9  |                                          |
| vanRC       | C8 |       |       |      | LowEfficiency, CtIsSmall, S <sub>e</sub> |
| vanRC4      | C8 |       |       |      | CurveFitFailed                           |
| vanRD       | C8 |       |       |      | BadR2, LowEfficiency, CtIsS              |
| vanSA       | C8 |       |       |      | LowEfficiency, CtIsSmall, S <sub>e</sub> |
| vanSB       | C8 | 28.52 | 74.66 | 2.04 |                                          |
| vanSC-01    | C8 | 33    | 84.07 | 2.03 |                                          |
| vanSC-02    | C8 |       |       |      | NoAmplification                          |
| vanTC-01    | C8 |       |       |      | CurveFitFailed                           |
| vanTC-02    | C8 | 36.69 | 86.71 | 1.74 |                                          |
| vanTE       | C8 | 37.27 | 89.34 | 1.88 |                                          |
| vanTG       | C8 |       |       |      | CurveFitFailed                           |
| vanWB       | C8 |       |       |      | BadR2, LowEfficiency, CtIsS              |
| vanWG       | C8 | 34.32 | 74.51 | 2.02 |                                          |
| vanXA       | C8 |       |       |      | LowEfficiency, CtIsSmall, C <sub>i</sub> |
| vanXB       | C8 |       |       |      | NoAmplification                          |
| vanXD       | C8 | 31.57 | 75.32 | 1.99 |                                          |

|              |    |       |       |      |                              |
|--------------|----|-------|-------|------|------------------------------|
| vanYB        | C8 |       |       |      | CurveFitFailed               |
| vanYD-01     | C8 | 30.75 | 81.83 | 1.79 |                              |
| vanYD-02     | C8 |       |       |      | CurveFitFailed               |
| vatB-01      | C8 | 35.2  | 74.91 | 1.99 |                              |
| vatB-02      | C8 |       |       |      | LowEfficiency, CtIsSmall, S: |
| vatC-01      | C8 |       |       |      | LowEfficiency, CtIsSmall, S: |
| vatC-02      | C8 | 33.6  | 87.58 | 1.91 |                              |
| vatE-01      | C8 | 30.22 | 76.39 | 2.11 |                              |
| vatE-02      | C8 |       |       |      | NoAmplification              |
| vgaA-01      | C8 |       |       |      | LowEfficiency, CtIsSmall, S: |
| vgaA-02      | C8 |       |       |      | LowEfficiency, CtIsSmall, S: |
| vgb-01       | C8 |       |       |      | CurveFitFailed               |
| vgbB-01      | C8 |       |       |      | CurveFitFailed               |
| vgbB-02      | C8 |       |       |      | CurveFitFailed               |
| yceE/mdtG-0  | C8 |       |       |      | BadR2, LowEfficiency, CtIsS: |
| yceE/mdtG-0  | C8 |       |       |      | CurveFitFailed               |
| yceL/mdtH-0  | C8 | 32.21 | 83.88 | 1.96 | MultipleMeltPeaks            |
| yceL/mdtH-0  | C8 |       |       |      | LowEfficiency, CtIsSmall, Ci |
| yceL/mdtH-0  | C8 | 36.63 | 78.44 | 1.89 |                              |
| yidY/mdtL-01 | C8 | 29.46 | 82.86 | 1.98 |                              |
| yidY/mdtL-02 | C8 |       |       |      | LowEfficiency, CtIsSmall, S: |



| Assay          | Sample | Ct | Tm    | Efficiency | Flags                  |
|----------------|--------|----|-------|------------|------------------------|
| 16S rRNA       | C9     |    | 20.38 | 82.11      | 1.99                   |
| aac            | C9     |    | 32.48 | 86.29      | 1.67 MultipleMeltPeaks |
| aac(6')-Ib(akz | C9     |    |       |            | NoAmplification        |
| aac(6')-Ib(akz | C9     |    | 35.82 | 78.83      | 1.9 MultipleMeltPeaks  |
| aac(6')-Ib(akz | C9     |    |       |            | CurveFitFailed         |
| aac(6')-II     | C9     |    | 32.84 | 79.05      | 1.95                   |
| aac(6')I1      | C9     |    |       |            | NoAmplification        |
| aacA/aphD      | C9     |    |       |            | NoAmplification        |
| aacC           | C9     |    | 40.98 | 72.04      | 1.57 MultipleMeltPeaks |
| aacC1          | C9     |    |       |            | NoAmplification        |
| aacC2          | C9     |    |       |            | NoAmplification        |
| aacC4          | C9     |    |       |            | NoAmplification        |
| aadA-01        | C9     |    |       |            | NoAmplification        |
| aadA-02        | C9     |    | 36.35 | 80.61      | 1.92                   |
| aadA-1-01      | C9     |    |       |            | NoAmplification        |
| aadA-1-02      | C9     |    |       |            | NoAmplification        |
| aadA1          | C9     |    | 37.85 | 84.65      | 1.87                   |
| aadA2-01       | C9     |    |       |            | NoAmplification        |
| aadA2-02       | C9     |    |       |            | NoAmplification        |
| aadA2-03       | C9     |    |       |            | NoAmplification        |
| aadA5-01       | C9     |    | 39.25 | 82.73      | 1.79                   |
| aadA5-02       | C9     |    | 38.52 | 82.12      | 1.79                   |
| aadA9-01       | C9     |    | 37.16 | 87.97      | 1.79                   |
| aadA9-02       | C9     |    |       |            | NoAmplification        |
| aadD           | C9     |    |       |            | NoAmplification        |
| aadE           | C9     |    |       |            | NoAmplification        |
| acrA-01        | C9     |    | 33.9  | 88.87      | 1.93                   |
| acrA-02        | C9     |    |       |            | NoAmplification        |
| acrA-03        | C9     |    |       |            | NoAmplification        |
| acrA-04        | C9     |    | 31.37 | 87.4       | 2                      |
| acrA-05        | C9     |    | 29.91 | 90.85      | 1.97                   |
| acrB-01        | C9     |    | 33.48 | 76.24      | 2.06                   |
| acrF           | C9     |    | 30.36 | 82.82      | 1.69                   |
| acrR-01        | C9     |    |       |            | CurveFitFailed         |
| acrR-02        | C9     |    | 39.87 | 64.99      | 1.64 MultipleMeltPeaks |
| Actin          | C9     |    | 22.75 | 87.07      | 1.94                   |
| adeA           | C9     |    | 38.7  | 61.59      | 1.89 MultipleMeltPeaks |
| ampC-01        | C9     |    | 35.66 | 79.87      | 1.9 MultipleMeltPeaks  |
| ampC-02        | C9     |    | 37.56 | 76.1       | 2.06                   |
| ampC-04        | C9     |    | 35.86 | 77.07      | 2.03 MultipleMeltPeaks |
| ampC-05        | C9     |    |       |            | NoAmplification        |
| ampC-06        | C9     |    |       |            | NoAmplification        |
| ampC-07        | C9     |    | 39.26 | 81.48      | 1.81 MultipleMeltPeaks |
| ampC-09        | C9     |    |       |            | NoAmplification        |
| ampC/blaDH     | C9     |    | 32.55 | 77.15      | 2.02                   |

|                          |    |       |       |      |                   |
|--------------------------|----|-------|-------|------|-------------------|
| aph                      | C9 |       |       |      | NoAmplification   |
| aph(2')-Id-01            | C9 | 30.92 | 72.28 | 2.11 |                   |
| aph(2')-Id-02            | C9 |       |       |      | NoAmplification   |
| aph6ia                   | C9 | 29.7  | 78.14 | 1.98 |                   |
| aphA1(aka k <sub>z</sub> | C9 |       |       |      | NoAmplification   |
| bacA-01                  | C9 |       |       |      | NoAmplification   |
| bacA-02                  | C9 | 38.56 | 88.11 | 1.65 | MultipleMeltPeaks |
| BETA-globin              | C9 | 24.1  | 84.21 | 2    |                   |
| bla-ACC-1                | C9 |       |       |      | NoAmplification   |
| bla-L1                   | C9 | 31.54 | 85.07 | 1.98 |                   |
| bla1                     | C9 |       |       |      | NoAmplification   |
| blaCMY                   | C9 |       |       |      | NoAmplification   |
| blaCMY2-01               | C9 |       |       |      | NoAmplification   |
| blaCMY2-02               | C9 | 32.26 | 85.49 | 1.92 |                   |
| blaCTX-M-01              | C9 |       |       |      | NoAmplification   |
| blaCTX-M-02              | C9 |       |       |      | NoAmplification   |
| blaCTX-M-03              | C9 |       |       |      | NoAmplification   |
| blaCTX-M-04              | C9 |       |       |      | NoAmplification   |
| blaCTX-M-05              | C9 | 33.93 | 76.61 | 1.9  |                   |
| blaCTX-M-06              | C9 |       |       |      | NoAmplification   |
| blaGES                   | C9 |       |       |      | NoAmplification   |
| blaIMP-01                | C9 |       |       |      | NoAmplification   |
| blaIMP-02                | C9 |       |       |      | NoAmplification   |
| blaMOX/blaC              | C9 |       |       |      | NoAmplification   |
| blaOCH                   | C9 |       |       |      | NoAmplification   |
| blaOKP                   | C9 |       |       |      | NoAmplification   |
| blaOXA1/blaC             | C9 |       |       |      | NoAmplification   |
| blaOXA10-01              | C9 |       |       |      | NoAmplification   |
| blaOXA10-02              | C9 |       |       |      | NoAmplification   |
| blaOXY                   | C9 |       |       |      | NoAmplification   |
| blaPAO                   | C9 |       |       |      | NoAmplification   |
| blaPER                   | C9 |       |       |      | NoAmplification   |
| blaPSE                   | C9 |       |       |      | NoAmplification   |
| blaROB                   | C9 |       |       |      | NoAmplification   |
| blaSFO                   | C9 | 35.51 | 80.34 | 1.89 | MultipleMeltPeaks |
| blaSHV-01                | C9 |       |       |      | NoAmplification   |
| blaSHV-02                | C9 |       |       |      | NoAmplification   |
| blaTEM                   | C9 |       |       |      | NoAmplification   |
| blaTLA                   | C9 |       |       |      | NoAmplification   |
| blaVEB                   | C9 |       |       |      | NoAmplification   |
| blaVIM                   | C9 |       |       |      | NoAmplification   |
| blaZ                     | C9 |       |       |      | NoAmplification   |
| carB                     | C9 |       |       |      | NoAmplification   |
| catA1                    | C9 |       |       |      | NoAmplification   |
| catB3                    | C9 | 33.83 | 87.5  | 1.9  |                   |
| catB8                    | C9 | 29.49 | 82.18 | 1.98 |                   |

|            |    |       |       |      |                              |
|------------|----|-------|-------|------|------------------------------|
| ceoA       | C9 | 32.59 | 82.36 | 1.96 |                              |
| cepA       | C9 |       |       |      | NoAmplification              |
| cfiA       | C9 | 32.86 | 89.37 | 1.76 | MultipleMeltPeaks            |
| cfr        | C9 |       |       |      | NoAmplification              |
| cfxA       | C9 | 25.09 | 77.43 | 1.83 |                              |
| cmeA       | C9 |       |       |      | NoAmplification              |
| cmlA1-01   | C9 |       |       |      | NoAmplification              |
| cmlA1-02   | C9 |       |       |      | NoAmplification              |
| cmr        | C9 |       |       |      | NoAmplification              |
| cmx(A)     | C9 | 30.98 | 85.09 | 1.94 |                              |
| cphA-01    | C9 |       |       |      | NoAmplification              |
| cphA-02    | C9 |       |       |      | CurveFitFailed               |
| dfrA1      | C9 | 36.88 | 78.51 | 2.33 | MultipleMeltPeaks            |
| dfrA12     | C9 |       |       |      | CurveFitFailed               |
| emrD       | C9 |       |       |      | NoAmplification              |
| ereA       | C9 | 42.36 | 80.39 | 1.71 | MultipleMeltPeaks            |
| ereB       | C9 |       |       |      | NoAmplification              |
| erm(34)    | C9 |       |       |      | NoAmplification              |
| erm(35)    | C9 |       |       |      | NoAmplification              |
| erm(36)    | C9 |       |       |      | NoAmplification              |
| ermA       | C9 |       |       |      | NoAmplification              |
| ermA/ermTR | C9 |       |       |      | NoAmplification              |
| ermB       | C9 |       |       |      | NoAmplification              |
| ermC       | C9 |       |       |      | NoAmplification              |
| ermF       | C9 |       |       |      | NoAmplification              |
| ermJ/ermD  | C9 |       |       |      | NoAmplification              |
| ermK-01    | C9 |       |       |      | NoAmplification              |
| ermK-02    | C9 |       |       |      | NoAmplification              |
| ermT-01    | C9 |       |       |      | NoAmplification              |
| ermT-02    | C9 |       |       |      | NoAmplification              |
| ermX       | C9 |       |       |      | NoAmplification              |
| ermY       | C9 |       |       |      | NoAmplification              |
| fabK       | C9 | 26.74 | 79.44 | 2.01 |                              |
| floR       | C9 |       |       |      | NoAmplification              |
| folA       | C9 |       |       |      | NoAmplification              |
| fosB       | C9 |       |       |      | LowEfficiency, CtIsSmall, S: |
| fosX       | C9 |       |       |      | NoAmplification              |
| fox5       | C9 | 32.16 | 86.37 | 1.79 |                              |
| imiR       | C9 |       |       |      | NoAmplification              |
| ImrA-01    | C9 | 37.72 | 83.53 | 1.93 |                              |
| intl       | C9 | 31.4  | 84.74 | 1.9  |                              |
| intl1      | C9 | 23.86 | 83.57 | 1.96 | MultipleMeltPeaks            |
| IS613      | C9 | 24.65 | 79.53 | 1.96 |                              |
| lnuA-01    | C9 |       |       |      | NoAmplification              |
| lnuB-01    | C9 |       |       |      | NoAmplification              |
| lnuB-02    | C9 |       |       |      | NoAmplification              |

|               |    |       |       |      |                   |
|---------------|----|-------|-------|------|-------------------|
| lnuC          | C9 | 40.63 | 64.63 | 1.64 | MultipleMeltPeaks |
| marR-01       | C9 | 37.74 | 85.5  | 1.78 |                   |
| matA/mel      | C9 | 25.08 | 77.52 | 2.04 |                   |
| mdet1         | C9 |       |       |      | NoAmplification   |
| mdtA          | C9 | 39.1  | 83.48 | 1.77 | MultipleMeltPeaks |
| mdtE/yhiU     | C9 |       |       |      | NoAmplification   |
| mecA          | C9 |       |       |      | NoAmplification   |
| mefA          | C9 | 24.52 | 80.51 | 2    |                   |
| mepA          | C9 | 36.73 | 90.78 | 1.79 | MultipleMeltPeaks |
| mexA          | C9 | 37.8  | 78.26 | 1.95 |                   |
| mexD          | C9 |       |       |      | NoAmplification   |
| mexE          | C9 |       |       |      | NoAmplification   |
| mexF          | C9 | 32.29 | 82    | 1.77 |                   |
| mphA-01       | C9 | 33.96 | 80.31 | 1.99 | MultipleMeltPeaks |
| mphA-02       | C9 | 34.05 | 76.73 | 1.96 |                   |
| mphB          | C9 |       |       |      | NoAmplification   |
| mphC          | C9 |       |       |      | NoAmplification   |
| msrA-01       | C9 |       |       |      | NoAmplification   |
| msrC-01       | C9 |       |       |      | NoAmplification   |
| mtrC-01       | C9 |       |       |      | NoAmplification   |
| mtrC-02       | C9 |       |       |      | NoAmplification   |
| mtrD-02       | C9 | 30.38 | 81.97 | 1.95 |                   |
| mtrD-03       | C9 |       |       |      | NoAmplification   |
| NDM1          | C9 |       |       |      | NoAmplification   |
| nimE          | C9 |       |       |      | NoAmplification   |
| nisB          | C9 |       |       |      | NoAmplification   |
| oleC          | C9 |       |       |      | NoAmplification   |
| oprD          | C9 | 32.37 | 81.74 | 2    |                   |
| oprJ          | C9 | 37.05 | 61.61 | 2    | MultipleMeltPeaks |
| pbp           | C9 | 39.32 | 80.97 | 1.77 | MultipleMeltPeaks |
| pbp2x         | C9 | 29.81 | 75.34 | 1.94 |                   |
| Pbp5          | C9 |       |       |      | NoAmplification   |
| penA          | C9 |       |       |      | NoAmplification   |
| pikR1         | C9 | 36.88 | 91.35 | 1.84 |                   |
| pikR2         | C9 | 34.5  | 84.65 | 1.94 |                   |
| pmrA          | C9 | 27.11 | 79.62 | 2.06 |                   |
| pncA          | C9 | 30.93 | 89.62 | 1.93 |                   |
| putative mult | C9 |       |       |      | CurveFitFailed    |
| qac           | C9 |       |       |      | NoAmplification   |
| qacA          | C9 |       |       |      | NoAmplification   |
| qacA/qacB     | C9 |       |       |      | NoAmplification   |
| qacEdelta1-0  | C9 |       |       |      | NoAmplification   |
| qacEdelta1-0  | C9 | 38.03 | 74.67 | 1.99 |                   |
| qacH-01       | C9 |       |       |      | CurveFitFailed    |
| qacH-02       | C9 | 35.13 | 83.7  | 1.64 |                   |
| qnrA          | C9 |       |       |      | NoAmplification   |

|              |    |       |       |      |                   |
|--------------|----|-------|-------|------|-------------------|
| rarD-02      | C9 |       |       |      | NoAmplification   |
| sat4         | C9 |       |       |      | NoAmplification   |
| sdeB         | C9 |       |       |      | NoAmplification   |
| spcN-01      | C9 |       |       |      | NoAmplification   |
| speA         | C9 |       |       |      | NoAmplification   |
| str          | C9 |       |       |      | NoAmplification   |
| strA         | C9 |       |       |      | NoAmplification   |
| strB         | C9 | 37.96 | 77.16 | 1.89 |                   |
| sul1         | C9 |       |       |      | NoAmplification   |
| sul2         | C9 |       |       |      | NoAmplification   |
| sulA/foIP-01 | C9 | 26.42 | 81.42 | 2    |                   |
| sulA/foIP-03 | C9 | 26    | 82.94 | 2.01 |                   |
| tet(32)      | C9 | 28.58 | 80.92 | 1.99 |                   |
| tet(34)      | C9 | 30.24 | 75.79 | 2.03 |                   |
| tet(35)      | C9 |       |       |      | NoAmplification   |
| tet(36)-A    | C9 |       |       |      | NoAmplification   |
| tet(36)-B    | C9 |       |       |      | NoAmplification   |
| tet(37)      | C9 | 26    | 76.44 | 1.99 |                   |
| tetA-01      | C9 |       |       |      | NoAmplification   |
| tetA-02      | C9 | 34.44 | 84.06 | 1.94 |                   |
| tetB-01      | C9 | 39.32 | 86.34 | 1.75 |                   |
| tetB-02      | C9 | 28.05 | 79.58 | 2.01 |                   |
| tetC-01      | C9 |       |       |      | NoAmplification   |
| tetC-02      | C9 |       |       |      | NoAmplification   |
| tetD-01      | C9 |       |       |      | NoAmplification   |
| tetD-02      | C9 | 37.23 | 81.22 | 2.05 | MultipleMeltPeaks |
| tetE         | C9 |       |       |      | NoAmplification   |
| tetG-01      | C9 | 34.27 | 88.39 | 1.91 | MultipleMeltPeaks |
| tetG-02      | C9 |       |       |      | CurveFitFailed    |
| tetH         | C9 |       |       |      | NoAmplification   |
| tetJ         | C9 |       |       |      | NoAmplification   |
| tetK         | C9 |       |       |      | NoAmplification   |
| tetL-01      | C9 |       |       |      | NoAmplification   |
| tetL-02      | C9 |       |       |      | NoAmplification   |
| tetM-01      | C9 | 27.2  | 75.71 | 2    |                   |
| tetM-02      | C9 | 28.19 | 77.37 | 2.01 |                   |
| tetO-01      | C9 | 28.06 | 76.69 | 2.04 |                   |
| tetPA        | C9 |       |       |      | NoAmplification   |
| tetPB-01     | C9 |       |       |      | NoAmplification   |
| tetPB-02     | C9 | 32.06 | 85.09 | 2    |                   |
| tetPB-03     | C9 |       |       |      | NoAmplification   |
| tetPB-05     | C9 |       |       |      | CurveFitFailed    |
| tetQ         | C9 | 29.1  | 77.2  | 1.99 |                   |
| tetR-02      | C9 | 35.33 | 84.99 | 1.81 | MultipleMeltPeaks |
| tetR-03      | C9 |       |       |      | NoAmplification   |
| tetS         | C9 | 39.11 | 80.62 | 1.87 | MultipleMeltPeaks |

|             |    |       |       |      |                   |
|-------------|----|-------|-------|------|-------------------|
| tetT        | C9 |       |       |      | NoAmplification   |
| tetU-01     | C9 |       |       |      | NoAmplification   |
| tetV        | C9 |       |       |      | NoAmplification   |
| tetW-01     | C9 | 25.32 | 81.83 | 2.02 |                   |
| tetX        | C9 |       |       |      | NoAmplification   |
| tnpA-01     | C9 |       |       |      | NoAmplification   |
| tnpA-02     | C9 | 35.52 | 84.62 | 1.71 |                   |
| tnpA-03     | C9 |       |       |      | NoAmplification   |
| tnpA-04     | C9 |       |       |      | NoAmplification   |
| tnpA-05     | C9 |       |       |      | NoAmplification   |
| tnpA-07     | C9 |       |       |      | NoAmplification   |
| tolC-01     | C9 |       |       |      | CurveFitFailed    |
| tolC-02     | C9 | 33.21 | 83.52 | 1.97 | MultipleMeltPeaks |
| tolC-03     | C9 | 36.36 | 84.66 | 1.84 |                   |
| Tp614       | C9 | 38.49 | 83.55 | 1.85 | MultipleMeltPeaks |
| ttgA        | C9 |       |       |      | NoAmplification   |
| ttgB        | C9 |       |       |      | NoAmplification   |
| vanA        | C9 |       |       |      | NoAmplification   |
| vanB-01     | C9 |       |       |      | NoAmplification   |
| vanC-01     | C9 |       |       |      | NoAmplification   |
| vanC-02     | C9 |       |       |      | NoAmplification   |
| vanC-03     | C9 | 32.05 | 85.56 | 1.87 |                   |
| vanC1       | C9 |       |       |      | NoAmplification   |
| vanC2/vanC3 | C9 | 39.88 | 84.76 | 1.72 | MultipleMeltPeaks |
| vanG        | C9 |       |       |      | NoAmplification   |
| vanHB       | C9 | 38.22 | 62.1  | 1.77 | MultipleMeltPeaks |
| vanHD       | C9 | 38.31 | 73.9  | 1.87 |                   |
| vanRA-01    | C9 |       |       |      | NoAmplification   |
| vanRA-02    | C9 |       |       |      | NoAmplification   |
| vanRB       | C9 |       |       |      | NoAmplification   |
| vanRC       | C9 |       |       |      | NoAmplification   |
| vanRC4      | C9 |       |       |      | NoAmplification   |
| vanRD       | C9 |       |       |      | NoAmplification   |
| vanSA       | C9 |       |       |      | NoAmplification   |
| vanSB       | C9 | 29.54 | 74.25 | 1.98 |                   |
| vanSC-01    | C9 | 37.42 | 61.78 | 1.92 | MultipleMeltPeaks |
| vanSC-02    | C9 |       |       |      | NoAmplification   |
| vanTC-01    | C9 |       |       |      | NoAmplification   |
| vanTC-02    | C9 |       |       |      | NoAmplification   |
| vanTE       | C9 |       |       |      | NoAmplification   |
| vanTG       | C9 |       |       |      | NoAmplification   |
| vanWB       | C9 |       |       |      | NoAmplification   |
| vanWG       | C9 |       |       |      | CurveFitFailed    |
| vanXA       | C9 | 35.03 | 73.67 | 1.85 |                   |
| vanXB       | C9 |       |       |      | NoAmplification   |
| vanXD       | C9 | 30.89 | 75.49 | 2.07 |                   |

|              |    |       |       |      |                   |
|--------------|----|-------|-------|------|-------------------|
| vanYB        | C9 |       |       |      | CurveFitFailed    |
| vanYD-01     | C9 | 31.54 | 83.99 | 1.79 |                   |
| vanYD-02     | C9 |       |       |      | NoAmplification   |
| vatB-01      | C9 |       |       |      | NoAmplification   |
| vatB-02      | C9 |       |       |      | CurveFitFailed    |
| vatC-01      | C9 | 38.41 | 81.2  | 1.77 | MultipleMeltPeaks |
| vatC-02      | C9 | 34.6  | 86.19 | 1.89 |                   |
| vatE-01      | C9 | 29.98 | 76.79 | 2.11 |                   |
| vatE-02      | C9 |       |       |      | NoAmplification   |
| vgaA-01      | C9 |       |       |      | NoAmplification   |
| vgaA-02      | C9 |       |       |      | CurveFitFailed    |
| vgb-01       | C9 |       |       |      | NoAmplification   |
| vgbB-01      | C9 |       |       |      | NoAmplification   |
| vgbB-02      | C9 |       |       |      | NoAmplification   |
| yceE/mdtG-0  | C9 |       |       |      | NoAmplification   |
| yceE/mdtG-0  | C9 | 36.24 | 81.05 | 1.9  |                   |
| yceL/mdtH-0  | C9 | 32.31 | 81.6  | 1.92 |                   |
| yceL/mdtH-0  | C9 |       |       |      | NoAmplification   |
| yceL/mdtH-0  | C9 |       |       |      | NoAmplification   |
| yidY/mdtL-01 | C9 | 37.81 | 80.43 | 1.8  | MultipleMeltPeaks |
| yidY/mdtL-02 | C9 |       |       |      | NoAmplification   |

| Assay          | Sample | Ct | Tm    | Efficiency | Flags                        |
|----------------|--------|----|-------|------------|------------------------------|
| 16S rRNA       | C10    |    | 17.11 | 82.27      | 2.06                         |
| aac            | C10    |    | 30.1  | 80.81      | 1.53 MultipleMeltPeaks       |
| aac(6')-Ib(akz | C10    |    |       |            | LowEfficiency, CtIsSmall, Ci |
| aac(6')-Ib(akz | C10    |    | 31.61 | 86.27      | 1.97 MultipleMeltPeaks       |
| aac(6')-Ib(akz | C10    |    | 32.02 | 84.21      | 2.05 MultipleMeltPeaks       |
| aac(6')-II     | C10    |    | 35.14 | 81.23      | 1.68 MultipleMeltPeaks       |
| aac(6')I1      | C10    |    | 33.5  | 89.88      | 2.01 MultipleMeltPeaks       |
| aacA/aphD      | C10    |    |       |            | CurveFitFailed               |
| aacC           | C10    |    | 31    | 90.47      | 2.02                         |
| aacC1          | C10    |    | 35.14 | 83.93      | 1.99                         |
| aacC2          | C10    |    |       |            | NoAmplification              |
| aacC4          | C10    |    | 35.77 | 78.34      | 1.91                         |
| aadA-01        | C10    |    |       |            | LowEfficiency, CtIsSmall, Ci |
| aadA-02        | C10    |    | 33.52 | 80.42      | 2.06                         |
| aadA-1-01      | C10    |    | 36.37 | 86.33      | 1.95 MultipleMeltPeaks       |
| aadA-1-02      | C10    |    |       |            | NoAmplification              |
| aadA1          | C10    |    | 34.93 | 83.58      | 1.97                         |
| aadA2-01       | C10    |    |       |            | NoAmplification              |
| aadA2-02       | C10    |    | 31.82 | 75.22      | 1.99                         |
| aadA2-03       | C10    |    |       |            | NoAmplification              |
| aadA5-01       | C10    |    |       |            | BadR2, LowEfficiency, CtIsS  |
| aadA5-02       | C10    |    | 34.24 | 87.01      | 2                            |
| aadA9-01       | C10    |    | 35.91 | 88.08      | 1.92 MultipleMeltPeaks       |
| aadA9-02       | C10    |    | 36.89 | 86.54      | 2.07 MultipleMeltPeaks       |
| aadD           | C10    |    |       |            | LowEfficiency, CtIsSmall, Ci |
| aadE           | C10    |    |       |            | LowEfficiency, CtIsSmall, Ci |
| acrA-01        | C10    |    | 32.35 | 88.89      | 2.02                         |
| acrA-02        | C10    |    | 36.84 | 87.87      | 1.85                         |
| acrA-03        | C10    |    | 36.66 | 79.87      | 1.83 MultipleMeltPeaks       |
| acrA-04        | C10    |    | 29.87 | 80.78      | 1.96                         |
| acrA-05        | C10    |    | 30.65 | 90.7       | 1.99                         |
| acrB-01        | C10    |    |       |            | NoAmplification              |
| acrF           | C10    |    | 29.61 | 84.66      | 1.69                         |
| acrR-01        | C10    |    | 34.81 | 81.1       | 2                            |
| acrR-02        | C10    |    | 34.88 | 85.95      | 1.89                         |
| Actin          | C10    |    | 20.09 | 87.08      | 1.98                         |
| adeA           | C10    |    | 34.28 | 88.03      | 1.91                         |
| ampC-01        | C10    |    | 31.55 | 85.53      | 1.93 MultipleMeltPeaks       |
| ampC-02        | C10    |    | 32.84 | 86.91      | 2                            |
| ampC-04        | C10    |    | 33.15 | 78.35      | 1.86                         |
| ampC-05        | C10    |    |       |            | LowEfficiency, CtIsSmall, Ci |
| ampC-06        | C10    |    |       |            | LowEfficiency, CtIsSmall, Ci |
| ampC-07        | C10    |    | 35.51 | 88.54      | 1.86                         |
| ampC-09        | C10    |    |       |            | NoAmplification              |
| ampC/blaDH     | C10    |    | 29.95 | 84.73      | 1.99 MultipleMeltPeaks       |



|                          |     |       |       |      |                                          |
|--------------------------|-----|-------|-------|------|------------------------------------------|
| aph                      | C10 |       |       |      | LowEfficiency, CtIsSmall, Ci             |
| aph(2')-Id-01            | C10 |       |       |      | CurveFitFailed                           |
| aph(2')-Id-02            | C10 |       |       |      | LowEfficiency, CtIsSmall, Ci             |
| aph6ia                   | C10 | 27.62 | 78.27 | 1.98 |                                          |
| aphA1(aka k <sub>z</sub> | C10 |       |       |      | LowEfficiency, CtIsSmall, Ci             |
| bacA-01                  | C10 |       |       |      | NoAmplification                          |
| bacA-02                  | C10 | 32.93 | 87.19 | 1.84 |                                          |
| BETA-globin              | C10 | 21.26 | 84.06 | 1.98 |                                          |
| bla-ACC-1                | C10 | 37.41 | 81.51 | 1.9  | MultipleMeltPeaks                        |
| bla-L1                   | C10 | 29.73 | 83.53 | 1.97 |                                          |
| bla1                     | C10 |       |       |      | LowEfficiency, CtIsSmall, Ci             |
| blaCMY                   | C10 | 37.17 | 76.45 | 1.94 |                                          |
| blaCMY2-01               | C10 |       |       |      | NoAmplification                          |
| blaCMY2-02               | C10 | 29.42 | 85.18 | 1.96 | MultipleMeltPeaks                        |
| blaCTX-M-01              | C10 |       |       |      | LowEfficiency, CtIsSmall, S <sub>e</sub> |
| blaCTX-M-02              | C10 | 37.97 | 79.72 | 1.75 | MultipleMeltPeaks                        |
| blaCTX-M-03              | C10 |       |       |      | LowEfficiency, CtIsSmall, Ci             |
| blaCTX-M-04              | C10 | 35.26 | 74.88 | 1.86 | MultipleMeltPeaks                        |
| blaCTX-M-05              | C10 | 34.83 | 76.63 | 1.85 |                                          |
| blaCTX-M-06              | C10 |       |       |      | NoAmplification                          |
| blaGES                   | C10 |       |       |      | CurveFitFailed                           |
| blaIMP-01                | C10 |       |       |      | NoAmplification                          |
| blaIMP-02                | C10 |       |       |      | LowEfficiency, CtIsSmall, Ci             |
| blaMOX/blaC              | C10 | 35.47 | 81.14 | 1.98 |                                          |
| blaOCH                   | C10 |       |       |      | NoAmplification                          |
| blaOKP                   | C10 |       |       |      | NoAmplification                          |
| blaOXA1/blaC             | C10 |       |       |      | LowEfficiency, CtIsSmall, Ci             |
| blaOXA10-01              | C10 |       |       |      | CurveFitFailed                           |
| blaOXA10-02              | C10 |       |       |      | CurveFitFailed                           |
| blaOXY                   | C10 |       |       |      | LowEfficiency, CtIsSmall, Ci             |
| blaPAO                   | C10 |       |       |      | LowEfficiency, CtIsSmall, Ci             |
| blaPER                   | C10 |       |       |      | LowEfficiency, CtIsSmall, Ci             |
| blaPSE                   | C10 |       |       |      | NoAmplification                          |
| blaROB                   | C10 |       |       |      | NoAmplification                          |
| blaSFO                   | C10 | 31.36 | 89.36 | 1.91 | MultipleMeltPeaks                        |
| blaSHV-01                | C10 |       |       |      | BadR2, LowEfficiency, CtIsS              |
| blaSHV-02                | C10 |       |       |      | LowEfficiency, CtIsSmall, Ci             |
| blaTEM                   | C10 |       |       |      | NoAmplification                          |
| blaTLA                   | C10 |       |       |      | LowEfficiency, CtIsSmall, Ci             |
| blaVEB                   | C10 |       |       |      | NoAmplification                          |
| blaVIM                   | C10 |       |       |      | NoAmplification                          |
| blaZ                     | C10 |       |       |      | NoAmplification                          |
| carB                     | C10 | 33.59 | 87.63 | 1.99 |                                          |
| catA1                    | C10 |       |       |      | NoAmplification                          |
| catB3                    | C10 | 34.06 | 87.52 | 1.97 |                                          |
| catB8                    | C10 | 25.84 | 84.7  | 1.95 | MultipleMeltPeaks                        |

|            |     |       |       |                              |
|------------|-----|-------|-------|------------------------------|
| ceoA       | C10 | 28.5  | 82.26 | 2.01                         |
| cepA       | C10 |       |       | NoAmplification              |
| cfiA       | C10 | 33.74 | 86.41 | 2 MultipleMeltPeaks          |
| cfr        | C10 |       |       | LowEfficiency, CtIsSmall, Ci |
| cfxA       | C10 | 20.76 | 77.53 | 1.87                         |
| cmeA       | C10 |       |       | LowEfficiency, CtIsSmall, Ci |
| cmlA1-01   | C10 | 36.81 | 80.27 | 2.01 MultipleMeltPeaks       |
| cmlA1-02   | C10 | 38.52 | 87.19 | 1.66 MultipleMeltPeaks       |
| cmr        | C10 | 34.3  | 78.6  | 1.97                         |
| cmx(A)     | C10 | 28.2  | 86.7  | 1.87 MultipleMeltPeaks       |
| cphA-01    | C10 | 34.5  | 85.55 | 2.06                         |
| cphA-02    | C10 | 35.08 | 81.63 | 2.01                         |
| dfrA1      | C10 |       |       | CurveFitFailed               |
| dfrA12     | C10 |       |       | NoAmplification              |
| emrD       | C10 | 31.15 | 90.68 | 1.72                         |
| ereA       | C10 |       |       | CurveFitFailed               |
| ereB       | C10 | 32.82 | 85.56 | 1.89                         |
| erm(34)    | C10 |       |       | NoAmplification              |
| erm(35)    | C10 |       |       | LowEfficiency, CtIsSmall, Ci |
| erm(36)    | C10 | 34.86 | 81.66 | 2.13 MultipleMeltPeaks       |
| ermA       | C10 |       |       | LowEfficiency, CtIsSmall, Ci |
| ermA/ermTR | C10 |       |       | NoAmplification              |
| ermB       | C10 | 26.49 | 74.85 | 1.94                         |
| ermC       | C10 | 34.96 | 78.17 | 2                            |
| ermF       | C10 |       |       | LowEfficiency, CtIsSmall, Ci |
| ermJ/ermD  | C10 |       |       | NoAmplification              |
| ermK-01    | C10 |       |       | LowEfficiency, CtIsSmall, S: |
| ermK-02    | C10 | 36.93 | 81.81 | 1.89                         |
| ermT-01    | C10 |       |       | LowEfficiency, CtIsSmall, Ci |
| ermT-02    | C10 |       |       | LowEfficiency, CtIsSmall, Ci |
| ermX       | C10 |       |       | BadR2, LowEfficiency, CtIsS  |
| ermY       | C10 |       |       | LowEfficiency, CtIsSmall, Ci |
| fabK       | C10 | 25.03 | 79.48 | 2.07                         |
| floR       | C10 | 37.63 | 83.67 | 1.76 MultipleMeltPeaks       |
| folA       | C10 |       |       | NoAmplification              |
| fosB       | C10 |       |       | LowEfficiency, CtIsSmall, S: |
| fosX       | C10 |       |       | LowEfficiency, CtIsSmall, Ci |
| fox5       | C10 | 29.7  | 86.5  | 1.82                         |
| imiR       | C10 |       |       | NoAmplification              |
| ImrA-01    | C10 |       |       | LowEfficiency, CtIsSmall, Ci |
| intl       | C10 | 29.65 | 84.88 | 1.98 MultipleMeltPeaks       |
| intl1      | C10 | 21.76 | 86.99 | 1.98 MultipleMeltPeaks       |
| IS613      | C10 | 21.43 | 79.57 | 1.93                         |
| lnuA-01    | C10 |       |       | LowEfficiency, CtIsSmall, Ci |
| lnuB-01    | C10 |       |       | LowEfficiency, CtIsSmall, Ci |
| lnuB-02    | C10 |       |       | LowEfficiency, CtIsSmall, Ci |

|               |     |       |       |      |                              |
|---------------|-----|-------|-------|------|------------------------------|
| lnuC          | C10 | 35.5  | 84.05 | 1.8  | MultipleMeltPeaks            |
| marR-01       | C10 | 34.8  | 85.29 | 1.95 |                              |
| matA/mel      | C10 | 22.1  | 77.52 | 2.08 |                              |
| mdet1         | C10 |       |       |      | LowEfficiency, CtIsSmall, Ci |
| mdtA          | C10 | 36.88 | 74.06 | 1.91 |                              |
| mdtE/yhiU     | C10 | 36.07 | 87.61 | 1.79 |                              |
| mecA          | C10 |       |       |      | NoAmplification              |
| mefA          | C10 | 21.2  | 80.29 | 1.99 |                              |
| mepA          | C10 | 31.27 | 90.89 | 1.96 |                              |
| mexA          | C10 |       |       |      | LowEfficiency, CtIsSmall, Ci |
| mexD          | C10 | 32.3  | 80.37 | 1.92 |                              |
| mexE          | C10 | 33.08 | 87.55 | 1.97 |                              |
| mexF          | C10 | 28.14 | 81.46 | 1.71 | MultipleMeltPeaks            |
| mphA-01       | C10 | 28    | 88.88 | 2.06 |                              |
| mphA-02       | C10 | 29.9  | 88.63 | 1.66 |                              |
| mphB          | C10 |       |       |      | CurveFitFailed               |
| mphC          | C10 |       |       |      | LowEfficiency, CtIsSmall, Ci |
| msrA-01       | C10 |       |       |      | CurveFitFailed               |
| msrC-01       | C10 |       |       |      | NoAmplification              |
| mtrC-01       | C10 |       |       |      | NoAmplification              |
| mtrC-02       | C10 | 33.64 | 84.27 | 2.02 |                              |
| mtrD-02       | C10 | 28.71 | 81.19 | 1.92 | MultipleMeltPeaks            |
| mtrD-03       | C10 | 31.99 | 79.39 | 1.75 |                              |
| NDM1          | C10 |       |       |      | LowEfficiency, CtIsSmall, Ci |
| nimE          | C10 |       |       |      | LowEfficiency, CtIsSmall, S: |
| nisB          | C10 |       |       |      | NoAmplification              |
| oleC          | C10 | 37.68 | 85.32 | 1.82 | MultipleMeltPeaks            |
| oprD          | C10 | 29.79 | 86.68 | 2.01 |                              |
| oprJ          | C10 | 32.45 | 90.65 | 1.83 |                              |
| pbp           | C10 |       |       |      | LowEfficiency, CtIsSmall, S: |
| pbp2x         | C10 |       |       |      | NoAmplification              |
| Pbp5          | C10 |       |       |      | LowEfficiency, CtIsSmall, Ci |
| penA          | C10 | 36.43 | 89.78 | 1.74 | MultipleMeltPeaks            |
| pikR1         | C10 | 34.91 | 89.61 | 1.92 | MultipleMeltPeaks            |
| pikR2         | C10 | 31.33 | 85.89 | 1.89 |                              |
| pmrA          | C10 | 28.89 | 79.59 | 2.06 |                              |
| pncA          | C10 | 35.76 | 81.59 | 1.82 | MultipleMeltPeaks            |
| putative mult | C10 | 37.18 | 77.21 | 1.88 | MultipleMeltPeaks            |
| qac           | C10 | 36.89 | 74.76 | 1.94 |                              |
| qacA          | C10 |       |       |      | NoAmplification              |
| qacA/qacB     | C10 |       |       |      | NoAmplification              |
| qacEdelta1-0  | C10 |       |       |      | NoAmplification              |
| qacEdelta1-0  | C10 | 25.91 | 77.33 | 1.96 |                              |
| qacH-01       | C10 | 31.59 | 88.36 | 1.85 |                              |
| qacH-02       | C10 | 33.95 | 83.74 | 1.72 | MultipleMeltPeaks            |
| qnrA          | C10 | 34.08 | 86.46 | 2.07 | MultipleMeltPeaks            |

|              |     |       |       |      |                              |
|--------------|-----|-------|-------|------|------------------------------|
| rarD-02      | C10 |       |       |      | NoAmplification              |
| sat4         | C10 |       |       |      | NoAmplification              |
| sdeB         | C10 |       |       |      | CurveFitFailed               |
| spcN-01      | C10 |       |       |      | LowEfficiency, CtIsSmall, Ci |
| speA         | C10 |       |       |      | NoAmplification              |
| str          | C10 |       |       |      | CurveFitFailed               |
| strA         | C10 |       |       |      | LowEfficiency, CtIsSmall, Ci |
| strB         | C10 |       |       |      | LowEfficiency, CtIsSmall, Ci |
| sul1         | C10 |       |       |      | NoAmplification              |
| sul2         | C10 |       |       |      | LowEfficiency, CtIsSmall, Ci |
| sulA/foIP-01 | C10 | 24.67 | 81.96 | 2.01 |                              |
| sulA/foIP-03 | C10 | 24.99 | 83.54 | 2.06 |                              |
| tet(32)      | C10 | 24.09 | 81.27 | 2.02 |                              |
| tet(34)      | C10 | 29.09 | 78.41 | 2.03 |                              |
| tet(35)      | C10 |       |       |      | NoAmplification              |
| tet(36)-A    | C10 |       |       |      | LowEfficiency, CtIsSmall, Ci |
| tet(36)-B    | C10 |       |       |      | LowEfficiency, CtIsSmall, Ci |
| tet(37)      | C10 | 23.72 | 76.42 | 1.99 |                              |
| tetA-01      | C10 | 30.28 | 85.08 | 1.94 |                              |
| tetA-02      | C10 | 35.46 | 89    | 1.87 |                              |
| tetB-01      | C10 | 31.35 | 86.29 | 2    |                              |
| tetB-02      | C10 | 36.35 | 80.51 | 1.92 |                              |
| tetC-01      | C10 |       |       |      | NoAmplification              |
| tetC-02      | C10 |       |       |      | LowEfficiency, CtIsSmall, Ci |
| tetD-01      | C10 |       |       |      | LowEfficiency, CtIsSmall, Ci |
| tetD-02      | C10 | 35.37 | 76.34 | 1.91 | MultipleMeltPeaks            |
| tetE         | C10 |       |       |      | NoAmplification              |
| tetG-01      | C10 | 32.7  | 89.39 | 1.5  | MultipleMeltPeaks            |
| tetG-02      | C10 |       |       |      | LowEfficiency, CtIsSmall, Ci |
| tetH         | C10 |       |       |      | CurveFitFailed               |
| tetJ         | C10 |       |       |      | LowEfficiency, CtIsSmall, Ci |
| tetK         | C10 |       |       |      | LowEfficiency, CtIsSmall, Ci |
| tetL-01      | C10 |       |       |      | NoAmplification              |
| tetL-02      | C10 | 35.97 | 84.77 | 1.9  |                              |
| tetM-01      | C10 | 24.81 | 76.03 | 2.01 |                              |
| tetM-02      | C10 | 23.66 | 77.64 | 2.06 |                              |
| tetO-01      | C10 |       |       |      | NoAmplification              |
| tetPA        | C10 |       |       |      | NoAmplification              |
| tetPB-01     | C10 | 36.68 | 85.22 | 1.88 |                              |
| tetPB-02     | C10 | 30.26 | 85.13 | 1.86 |                              |
| tetPB-03     | C10 |       |       |      | LowEfficiency, CtIsSmall, Ci |
| tetPB-05     | C10 |       |       |      | NoAmplification              |
| tetQ         | C10 | 27.2  | 75.82 | 2.02 |                              |
| tetR-02      | C10 | 30.24 | 89.11 | 1.86 |                              |
| tetR-03      | C10 |       |       |      | LowEfficiency, CtIsSmall, Ci |
| tetS         | C10 |       |       |      | BadR2, LowEfficiency, CtIsS  |

|             |     |       |       |                              |
|-------------|-----|-------|-------|------------------------------|
| tetT        | C10 |       |       | NoAmplification              |
| tetU-01     | C10 |       |       | NoAmplification              |
| tetV        | C10 | 33.75 | 89.07 | 1.85                         |
| tetW-01     | C10 | 23.43 | 81.93 | 2.03                         |
| tetX        | C10 |       |       | CtIsSmall, SaturationBaseli  |
| tnpA-01     | C10 |       |       | LowEfficiency, CtIsSmall, Ci |
| tnpA-02     | C10 | 33.43 | 86.83 | 1.8 MultipleMeltPeaks        |
| tnpA-03     | C10 | 31.14 | 85.58 | 1.82                         |
| tnpA-04     | C10 | 37.51 | 78.37 | 1.86 MultipleMeltPeaks       |
| tnpA-05     | C10 |       |       | CurveFitFailed               |
| tnpA-07     | C10 |       |       | LowEfficiency, CtIsSmall, Ci |
| tolC-01     | C10 | 36.67 | 79.37 | 1.93 MultipleMeltPeaks       |
| tolC-02     | C10 | 29.97 | 87.1  | 1.98                         |
| tolC-03     | C10 | 30.68 | 86.06 | 1.98                         |
| Tp614       | C10 |       |       | CurveFitFailed               |
| ttgA        | C10 | 36.97 | 83.86 | 1.9                          |
| ttgB        | C10 | 36.89 | 79.07 | 1.95                         |
| vanA        | C10 |       |       | NoAmplification              |
| vanB-01     | C10 | 30.27 | 83.36 | 1.79                         |
| vanC-01     | C10 |       |       | LowEfficiency, CtIsSmall, S  |
| vanC-02     | C10 |       |       | LowEfficiency, CtIsSmall, Ci |
| vanC-03     | C10 | 28.52 | 85.5  | 1.86                         |
| vanC1       | C10 |       |       | NoAmplification              |
| vanC2/vanC3 | C10 | 35.45 | 76.05 | 1.79 MultipleMeltPeaks       |
| vanG        | C10 |       |       | CurveFitFailed               |
| vanHB       | C10 | 35.17 | 89.23 | 1.91                         |
| vanHD       | C10 |       |       | NoAmplification              |
| vanRA-01    | C10 |       |       | LowEfficiency, CtIsSmall, Ci |
| vanRA-02    | C10 |       |       | NoAmplification              |
| vanRB       | C10 | 36.77 | 81.58 | 1.96                         |
| vanRC       | C10 |       |       | CurveFitFailed               |
| vanRC4      | C10 |       |       | NoAmplification              |
| vanRD       | C10 |       |       | BadR2, CtIsSmall, Saturatio  |
| vanSA       | C10 |       |       | LowEfficiency, CtIsSmall, Ci |
| vanSB       | C10 | 30.31 | 74.13 | 1.89                         |
| vanSC-01    | C10 | 31.58 | 84.03 | 1.79                         |
| vanSC-02    | C10 |       |       | NoAmplification              |
| vanTC-01    | C10 |       |       | LowEfficiency, CtIsSmall, Ci |
| vanTC-02    | C10 |       |       | NoAmplification              |
| vanTE       | C10 |       |       | NoAmplification              |
| vanTG       | C10 |       |       | NoAmplification              |
| vanWB       | C10 |       |       | LowEfficiency, CtIsSmall, Ci |
| vanWG       | C10 | 35.9  | 74.3  | 1.99                         |
| vanXA       | C10 |       |       | NoAmplification              |
| vanXB       | C10 |       |       | NoAmplification              |
| vanXD       | C10 | 30.08 | 75.9  | 2.05                         |

|              |     |       |       |      |                              |
|--------------|-----|-------|-------|------|------------------------------|
| vanYB        | C10 | 35.68 | 82.86 | 1.93 |                              |
| vanYD-01     | C10 | 30.54 | 86.46 | 1.83 |                              |
| vanYD-02     | C10 | 35.94 | 81.28 | 1.95 |                              |
| vatB-01      | C10 |       |       |      | CurveFitFailed               |
| vatB-02      | C10 | 35.37 | 85.55 | 2.2  |                              |
| vatC-01      | C10 | 36.03 | 71.47 | 1.99 |                              |
| vatC-02      | C10 | 35.43 | 87.55 | 1.91 |                              |
| vatE-01      | C10 | 28.99 | 75.97 | 2.07 |                              |
| vatE-02      | C10 |       |       |      | NoAmplification              |
| vgaA-01      | C10 |       |       |      | LowEfficiency, CtIsSmall, Ci |
| vgaA-02      | C10 |       |       |      | LowEfficiency, CtIsSmall, Ci |
| vgb-01       | C10 |       |       |      | CurveFitFailed               |
| vgbB-01      | C10 |       |       |      | NoAmplification              |
| vgbB-02      | C10 |       |       |      | NoAmplification              |
| yceE/mdtG-0  | C10 | 31.25 | 77.48 | 2.15 |                              |
| yceE/mdtG-0  | C10 |       |       |      | NoAmplification              |
| yceL/mdtH-0  | C10 | 31.47 | 86.54 | 2.01 | MultipleMeltPeaks            |
| yceL/mdtH-0  | C10 |       |       |      | LowEfficiency, CtIsSmall, Ci |
| yceL/mdtH-0  | C10 | 32.8  | 83.6  | 1.92 |                              |
| yidY/mdtL-01 | C10 | 32.09 | 88.78 | 1.96 |                              |
| yidY/mdtL-02 | C10 | 37.15 | 74.7  | 2.01 | MultipleMeltPeaks            |

| Assay          | Sample | Ct    | Tm    | Efficiency | Flags                        |
|----------------|--------|-------|-------|------------|------------------------------|
| 16S rRNA       | C11    |       | 17.46 | 82.13      | 1.94                         |
| aac            | C11    |       | 30.4  | 82.46      | 1.81 MultipleMeltPeaks       |
| aac(6')-Ib(akz | C11    |       |       |            | LowEfficiency, CtIsSmall, S: |
| aac(6')-Ib(akz | C11    | 34.85 | 82.45 | 1.96       | MultipleMeltPeaks            |
| aac(6')-Ib(akz | C11    |       |       |            | CurveFitFailed               |
| aac(6')-II     | C11    | 37.57 | 81.17 | 1.67       |                              |
| aac(6')I1      | C11    | 38.08 | 62.55 | 1.77       | MultipleMeltPeaks            |
| aacA/aphD      | C11    |       |       |            | LowEfficiency, CtIsSmall, S: |
| aacC           | C11    | 30.69 | 89.66 | 1.92       |                              |
| aacC1          | C11    |       |       |            | NoAmplification              |
| aacC2          | C11    | 36.37 | 83.23 | 1.93       |                              |
| aacC4          | C11    | 36.33 | 89.57 | 1.87       |                              |
| aadA-01        | C11    |       |       |            | NoAmplification              |
| aadA-02        | C11    |       |       |            | CurveFitFailed               |
| aadA-1-01      | C11    |       |       |            | NoAmplification              |
| aadA-1-02      | C11    | 27.53 | 76.42 | 2.02       |                              |
| aadA1          | C11    | 37.68 | 85.77 | 1.92       | MultipleMeltPeaks            |
| aadA2-01       | C11    |       |       |            | NoAmplification              |
| aadA2-02       | C11    | 33    | 75.33 | 1.99       |                              |
| aadA2-03       | C11    |       |       |            | NoAmplification              |
| aadA5-01       | C11    |       |       |            | CurveFitFailed               |
| aadA5-02       | C11    | 35.47 | 77.9  | 1.98       | MultipleMeltPeaks            |
| aadA9-01       | C11    |       |       |            | CurveFitFailed               |
| aadA9-02       | C11    |       |       |            | LowEfficiency, CtIsSmall, S: |
| aadD           | C11    |       |       |            | CurveFitFailed               |
| aadE           | C11    | 26.35 | 72.2  | 2.09       |                              |
| acrA-01        | C11    | 31.36 | 88.9  | 1.93       |                              |
| acrA-02        | C11    | 39.62 | 82.03 | 1.79       |                              |
| acrA-03        | C11    |       |       |            | CurveFitFailed               |
| acrA-04        | C11    | 31.79 | 80.92 | 1.97       |                              |
| acrA-05        | C11    | 33.18 | 91.13 | 1.96       |                              |
| acrB-01        | C11    | 37.35 | 81.54 | 2.02       | MultipleMeltPeaks            |
| acrF           | C11    | 31.42 | 81.95 | 1.85       | MultipleMeltPeaks            |
| acrR-01        | C11    | 36.34 | 78.85 | 1.9        |                              |
| acrR-02        | C11    | 36.08 | 86.35 | 1.83       | MultipleMeltPeaks            |
| Actin          | C11    | 21.2  | 87.07 | 1.99       | MultipleMeltPeaks            |
| adeA           | C11    | 37.23 | 80.07 | 1.98       | MultipleMeltPeaks            |
| ampC-01        | C11    | 32.08 | 84.95 | 2.03       |                              |
| ampC-02        | C11    | 37.07 | 88.27 | 2.05       | MultipleMeltPeaks            |
| ampC-04        | C11    | 35.93 | 77.28 | 2.14       |                              |
| ampC-05        | C11    |       |       |            | LowEfficiency, CtIsSmall, C: |
| ampC-06        | C11    |       |       |            | CurveFitFailed               |
| ampC-07        | C11    | 33.75 | 88.32 | 1.89       |                              |
| ampC-09        | C11    |       |       |            | NoAmplification              |
| ampC/blaDH     | C11    | 30.06 | 76.9  | 1.99       | MultipleMeltPeaks            |

|                          |     |       |       |      |                              |
|--------------------------|-----|-------|-------|------|------------------------------|
| aph                      | C11 |       |       |      | LowEfficiency, CtIsSmall, S: |
| aph(2')-Id-01            | C11 |       |       |      | LowEfficiency, CtIsSmall, S: |
| aph(2')-Id-02            | C11 |       |       |      | LowEfficiency, CtIsSmall, C: |
| aph6ia                   | C11 | 37.99 | 84.69 | 1.89 | MultipleMeltPeaks            |
| aphA1(aka k <sub>z</sub> | C11 |       |       |      | LowEfficiency, CtIsSmall, C: |
| bacA-01                  | C11 |       |       |      | NoAmplification              |
| bacA-02                  | C11 | 32.53 | 83.45 | 1.81 |                              |
| BETA-globin              | C11 | 22.63 | 84.24 | 1.97 |                              |
| bla-ACC-1                | C11 |       |       |      | NoAmplification              |
| bla-L1                   | C11 | 28.96 | 86.14 | 1.98 |                              |
| bla1                     | C11 |       |       |      | LowEfficiency, CtIsSmall, C: |
| blaCMY                   | C11 |       |       |      | LowEfficiency, CtIsSmall, C: |
| blaCMY2-01               | C11 |       |       |      | NoAmplification              |
| blaCMY2-02               | C11 | 29.76 | 82.6  | 1.95 | MultipleMeltPeaks            |
| blaCTX-M-01              | C11 | 37.66 | 89.26 | 1.74 | MultipleMeltPeaks            |
| blaCTX-M-02              | C11 | 35.33 | 87.95 | 1.89 |                              |
| blaCTX-M-03              | C11 |       |       |      | CurveFitFailed               |
| blaCTX-M-04              | C11 | 34.18 | 88.27 | 1.93 |                              |
| blaCTX-M-05              | C11 | 30.69 | 76.34 | 1.84 |                              |
| blaCTX-M-06              | C11 |       |       |      | NoAmplification              |
| blaGES                   | C11 |       |       |      | NoAmplification              |
| blaIMP-01                | C11 |       |       |      | NoAmplification              |
| blaIMP-02                | C11 |       |       |      | LowEfficiency, CtIsSmall, S: |
| blaMOX/blaC              | C11 |       |       |      | NoAmplification              |
| blaOCH                   | C11 |       |       |      | NoAmplification              |
| blaOKP                   | C11 |       |       |      | NoAmplification              |
| blaOXA1/blaC             | C11 |       |       |      | NoAmplification              |
| blaOXA10-01              | C11 |       |       |      | LowEfficiency, CtIsSmall, S: |
| blaOXA10-02              | C11 |       |       |      | LowEfficiency, CtIsSmall, S: |
| blaOXY                   | C11 |       |       |      | CurveFitFailed               |
| blaPAO                   | C11 |       |       |      | NoAmplification              |
| blaPER                   | C11 |       |       |      | LowEfficiency, CtIsSmall, S: |
| blaPSE                   | C11 |       |       |      | NoAmplification              |
| blaROB                   | C11 | 37.11 | 88.74 | 1.77 | MultipleMeltPeaks            |
| blaSFO                   | C11 | 34.94 | 82.61 | 1.9  | MultipleMeltPeaks            |
| blaSHV-01                | C11 |       |       |      | LowEfficiency, CtIsSmall, C: |
| blaSHV-02                | C11 | 38.38 | 79.27 | 1.81 | MultipleMeltPeaks            |
| blaTEM                   | C11 | 28.3  | 79.04 | 1.88 |                              |
| blaTLA                   | C11 |       |       |      | LowEfficiency, CtIsSmall, S: |
| blaVEB                   | C11 |       |       |      | NoAmplification              |
| blaVIM                   | C11 |       |       |      | NoAmplification              |
| blaZ                     | C11 |       |       |      | NoAmplification              |
| carB                     | C11 | 35.17 | 82.54 | 1.95 |                              |
| catA1                    | C11 |       |       |      | NoAmplification              |
| catB3                    | C11 | 38.66 | 79.99 | 1.72 | MultipleMeltPeaks            |
| catB8                    | C11 | 30.9  | 82.28 | 1.96 |                              |



|            |     |       |       |      |                              |
|------------|-----|-------|-------|------|------------------------------|
| ceoA       | C11 | 28.73 | 82.3  | 1.98 |                              |
| cepA       | C11 |       |       |      | NoAmplification              |
| cfiA       | C11 |       |       |      | NoAmplification              |
| cfr        | C11 |       |       |      | LowEfficiency, CtIsSmall, S: |
| cfxA       | C11 | 23.43 | 77.55 | 1.93 |                              |
| cmeA       | C11 |       |       |      | LowEfficiency, CtIsSmall, S: |
| cmlA1-01   | C11 |       |       |      | NoAmplification              |
| cmlA1-02   | C11 |       |       |      | NoAmplification              |
| cmr        | C11 |       |       |      | NoAmplification              |
| cmx(A)     | C11 | 29.48 | 84.62 | 1.94 | MultipleMeltPeaks            |
| cphA-01    | C11 | 35.12 | 86.65 | 1.92 | MultipleMeltPeaks            |
| cphA-02    | C11 | 29.97 | 78.25 | 1.96 | MultipleMeltPeaks            |
| dfrA1      | C11 |       |       |      | NoAmplification              |
| dfrA12     | C11 |       |       |      | CurveFitFailed               |
| emrD       | C11 |       |       |      | NoAmplification              |
| ereA       | C11 | 35.57 | 82.71 | 1.91 |                              |
| ereB       | C11 |       |       |      | CurveFitFailed               |
| erm(34)    | C11 |       |       |      | NoAmplification              |
| erm(35)    | C11 |       |       |      | CurveFitFailed               |
| erm(36)    | C11 | 41.42 | 61.9  | 1.72 | MultipleMeltPeaks            |
| ermA       | C11 |       |       |      | CurveFitFailed               |
| ermA/ermTR | C11 |       |       |      | NoAmplification              |
| ermB       | C11 | 21.66 | 75.07 | 2.06 |                              |
| ermC       | C11 |       |       |      | CurveFitFailed               |
| ermF       | C11 |       |       |      | LowEfficiency, CtIsSmall, S: |
| ermJ/ermD  | C11 |       |       |      | NoAmplification              |
| ermK-01    | C11 | 36.87 | 73.57 | 1.96 |                              |
| ermK-02    | C11 | 35.28 | 80.75 | 2.01 |                              |
| ermT-01    | C11 |       |       |      | LowEfficiency, CtIsSmall, S: |
| ermT-02    | C11 |       |       |      | LowEfficiency, CtIsSmall, S: |
| ermX       | C11 |       |       |      | LowEfficiency, CtIsSmall, S: |
| ermY       | C11 |       |       |      | LowEfficiency, CtIsSmall, S: |
| fabK       | C11 | 27.17 | 78.9  | 2    |                              |
| floR       | C11 | 37.82 | 83.62 | 1.94 | MultipleMeltPeaks            |
| folA       | C11 |       |       |      | NoAmplification              |
| fosB       | C11 |       |       |      | LowEfficiency, CtIsSmall, S: |
| fosX       | C11 |       |       |      | CurveFitFailed               |
| fox5       | C11 | 30.31 | 86.52 | 1.8  |                              |
| imiR       | C11 |       |       |      | LowEfficiency, CtIsSmall, Ci |
| ImrA-01    | C11 | 39.31 | 79.78 | 1.79 | MultipleMeltPeaks            |
| intl       | C11 | 31.56 | 84.71 | 1.88 |                              |
| intl1      | C11 | 22.65 | 87.02 | 1.97 | MultipleMeltPeaks            |
| IS613      | C11 | 23.06 | 79.5  | 1.85 |                              |
| lnuA-01    | C11 |       |       |      | LowEfficiency, CtIsSmall, Ci |
| lnuB-01    | C11 |       |       |      | CurveFitFailed               |
| lnuB-02    | C11 |       |       |      | CurveFitFailed               |

|              |     |       |       |      |                             |
|--------------|-----|-------|-------|------|-----------------------------|
| lnuC         | C11 | 43.72 | 82.97 | 1.6  | MultipleMeltPeaks           |
| marR-01      | C11 |       |       |      | LowEfficiency, CtIsSmall, S |
| matA/mel     | C11 | 21.57 | 77.63 | 2.06 |                             |
| mdet1        | C11 |       |       |      | LowEfficiency, CtIsSmall, C |
| mdtA         | C11 | 38.4  | 81.95 | 1.84 | MultipleMeltPeaks           |
| mdtE/yhiU    | C11 |       |       |      | CurveFitFailed              |
| mecA         | C11 |       |       |      | LowEfficiency, CtIsSmall, S |
| mefA         | C11 | 20.76 | 80.56 | 1.98 |                             |
| mepA         | C11 | 36.22 | 79.98 | 1.88 |                             |
| mexA         | C11 |       |       |      | CurveFitFailed              |
| mexD         | C11 | 31.75 | 80.47 | 2.02 |                             |
| mexE         | C11 | 35.62 | 87.56 | 1.92 |                             |
| mexF         | C11 | 30.73 | 86.07 | 1.57 |                             |
| mphA-01      | C11 | 33.3  | 88.82 | 1.94 |                             |
| mphA-02      | C11 | 33.5  | 85.31 | 1.73 |                             |
| mphB         | C11 |       |       |      | CurveFitFailed              |
| mphC         | C11 |       |       |      | LowEfficiency, CtIsSmall, C |
| msrA-01      | C11 |       |       |      | LowEfficiency, CtIsSmall, C |
| msrC-01      | C11 |       |       |      | NoAmplification             |
| mtrC-01      | C11 |       |       |      | LowEfficiency, CtIsSmall, C |
| mtrC-02      | C11 | 38.57 | 84.07 | 1.79 |                             |
| mtrD-02      | C11 | 28.35 | 81.26 | 1.96 |                             |
| mtrD-03      | C11 | 36.16 | 84.29 | 1.86 |                             |
| NDM1         | C11 |       |       |      | LowEfficiency, CtIsSmall, S |
| nimE         | C11 |       |       |      | CurveFitFailed              |
| nisB         | C11 |       |       |      | NoAmplification             |
| oleC         | C11 | 37.87 | 84.26 | 1.87 | MultipleMeltPeaks           |
| oprD         | C11 | 28.83 | 85.9  | 2.01 | MultipleMeltPeaks           |
| oprJ         | C11 | 37.26 | 64.6  | 1.9  | MultipleMeltPeaks           |
| pbp          | C11 |       |       |      | LowEfficiency, CtIsSmall, C |
| pbp2x        | C11 |       |       |      | NoAmplification             |
| Pbp5         | C11 |       |       |      | LowEfficiency, CtIsSmall, S |
| penA         | C11 |       |       |      | NoAmplification             |
| pikR1        | C11 | 33.3  | 77.52 | 1.99 |                             |
| pikR2        | C11 | 32.4  | 84.69 | 1.97 |                             |
| pmrA         | C11 | 26.73 | 79.31 | 2.08 |                             |
| pncA         | C11 | 29.9  | 89.46 | 1.95 |                             |
| putative mul | C11 |       |       |      | LowEfficiency, CtIsSmall, S |
| qac          | C11 | 35.25 | 78.86 | 1.96 |                             |
| qacA         | C11 |       |       |      | NoAmplification             |
| qacA/qacB    | C11 |       |       |      | BadR2, LowEfficiency, CtIsS |
| qacEdelta1-0 | C11 |       |       |      | NoAmplification             |
| qacEdelta1-0 | C11 | 36.41 | 77.19 | 1.87 | MultipleMeltPeaks           |
| qacH-01      | C11 | 37.72 | 76.55 | 1.91 | MultipleMeltPeaks           |
| qacH-02      | C11 | 37.47 | 83.99 | 1.6  |                             |
| qnrA         | C11 |       |       |      | CurveFitFailed              |

|              |     |       |       |      |                              |
|--------------|-----|-------|-------|------|------------------------------|
| rarD-02      | C11 |       |       |      | NoAmplification              |
| sat4         | C11 | 27.29 | 74.9  | 2.01 |                              |
| sdeB         | C11 |       |       |      | LowEfficiency, CtIsSmall, S: |
| spcN-01      | C11 |       |       |      | NoAmplification              |
| speA         | C11 |       |       |      | NoAmplification              |
| str          | C11 |       |       |      | LowEfficiency, CtIsSmall, C: |
| strA         | C11 |       |       |      | LowEfficiency, CtIsSmall, C: |
| strB         | C11 | 36.54 | 79.59 | 1.91 |                              |
| sul1         | C11 |       |       |      | NoAmplification              |
| sul2         | C11 |       |       |      | CurveFitFailed               |
| sulA/foIP-01 | C11 | 23.46 | 81.87 | 2.03 |                              |
| sulA/foIP-03 | C11 | 22.5  | 84.03 | 2    |                              |
| tet(32)      | C11 | 27.71 | 81.1  | 1.99 |                              |
| tet(34)      | C11 | 29.93 | 75.95 | 2.03 |                              |
| tet(35)      | C11 | 37.55 | 83.09 | 1.92 |                              |
| tet(36)-A    | C11 |       |       |      | CurveFitFailed               |
| tet(36)-B    | C11 |       |       |      | LowEfficiency, CtIsSmall, S: |
| tet(37)      | C11 |       |       |      | LowEfficiency, CtIsSmall, S: |
| tetA-01      | C11 | 33.22 | 85.07 | 1.99 |                              |
| tetA-02      | C11 |       |       |      | LowEfficiency, CtIsSmall, S: |
| tetB-01      | C11 | 24.83 | 79.52 | 1.99 | MultipleMeltPeaks            |
| tetB-02      | C11 | 25.05 | 79.71 | 2.03 |                              |
| tetC-01      | C11 | 24.86 | 75.31 | 1.99 |                              |
| tetC-02      | C11 | 24.89 | 76.13 | 2.07 |                              |
| tetD-01      | C11 |       |       |      | LowEfficiency, CtIsSmall, S: |
| tetD-02      | C11 |       |       |      | NoAmplification              |
| tetE         | C11 |       |       |      | NoAmplification              |
| tetG-01      | C11 |       |       |      | CurveFitFailed               |
| tetG-02      | C11 | 33.98 | 81.59 | 2.04 |                              |
| tetH         | C11 |       |       |      | NoAmplification              |
| tetJ         | C11 |       |       |      | LowEfficiency, CtIsSmall, S: |
| tetK         | C11 |       |       |      | CurveFitFailed               |
| tetL-01      | C11 |       |       |      | NoAmplification              |
| tetL-02      | C11 | 36.8  | 85.38 | 1.72 |                              |
| tetM-01      | C11 | 20.53 | 76.22 | 2.01 |                              |
| tetM-02      | C11 | 20.66 | 77.74 | 2.05 |                              |
| tetO-01      | C11 | 26.22 | 76.79 | 2.06 |                              |
| tetPA        | C11 |       |       |      | NoAmplification              |
| tetPB-01     | C11 |       |       |      | NoAmplification              |
| tetPB-02     | C11 | 29.84 | 85.12 | 1.99 |                              |
| tetPB-03     | C11 |       |       |      | LowEfficiency, CtIsSmall, S: |
| tetPB-05     | C11 |       |       |      | LowEfficiency, CtIsSmall, S: |
| tetQ         | C11 | 24.87 | 77.2  | 2.06 |                              |
| tetR-02      | C11 | 33.28 | 88.85 | 1.89 |                              |
| tetR-03      | C11 | 24.44 | 76.19 | 2    |                              |
| tetS         | C11 | 36.07 | 85.26 | 1.9  |                              |

|             |     |       |       |      |                              |
|-------------|-----|-------|-------|------|------------------------------|
| tetT        | C11 |       |       |      | NoAmplification              |
| tetU-01     | C11 |       |       |      | NoAmplification              |
| tetV        | C11 |       |       |      | CurveFitFailed               |
| tetW-01     | C11 | 26.11 | 81.69 | 2.03 |                              |
| tetX        | C11 |       |       |      | BadR2, CtIsSmall, Saturatio  |
| tnpA-01     | C11 |       |       |      | LowEfficiency, CtIsSmall, S: |
| tnpA-02     | C11 | 35.72 | 84.71 | 1.88 |                              |
| tnpA-03     | C11 | 29.02 | 77.83 | 2.05 |                              |
| tnpA-04     | C11 |       |       |      | CurveFitFailed               |
| tnpA-05     | C11 |       |       |      | LowEfficiency, CtIsSmall, C: |
| tnpA-07     | C11 |       |       |      | NoAmplification              |
| tolC-01     | C11 | 36.48 | 80.06 | 1.81 |                              |
| tolC-02     | C11 | 32.59 | 83.58 | 1.98 |                              |
| tolC-03     | C11 | 30.64 | 85.93 | 1.97 |                              |
| Tp614       | C11 | 37.67 | 80.75 | 1.97 | MultipleMeltPeaks            |
| ttgA        | C11 |       |       |      | NoAmplification              |
| ttgB        | C11 |       |       |      | BadR2, LowEfficiency, CtIsS  |
| vanA        | C11 |       |       |      | NoAmplification              |
| vanB-01     | C11 | 37.98 | 83.32 | 1.96 | MultipleMeltPeaks            |
| vanC-01     | C11 |       |       |      | CurveFitFailed               |
| vanC-02     | C11 |       |       |      | LowEfficiency, CtIsSmall, S: |
| vanC-03     | C11 | 36.05 | 85.87 | 1.83 |                              |
| vanC1       | C11 |       |       |      | NoAmplification              |
| vanC2/vanC3 | C11 |       |       |      | CurveFitFailed               |
| vanG        | C11 |       |       |      | CtIsSmall, SaturationBaseli  |
| vanHB       | C11 | 35.68 | 82.71 | 1.95 |                              |
| vanHD       | C11 |       |       |      | NoAmplification              |
| vanRA-01    | C11 |       |       |      | LowEfficiency, CtIsSmall, C: |
| vanRA-02    | C11 |       |       |      | NoAmplification              |
| vanRB       | C11 | 38.11 | 62.3  | 1.71 | MultipleMeltPeaks            |
| vanRC       | C11 |       |       |      | LowEfficiency, CtIsSmall, S: |
| vanRC4      | C11 |       |       |      | CurveFitFailed               |
| vanRD       | C11 |       |       |      | NoAmplification              |
| vanSA       | C11 |       |       |      | LowEfficiency, CtIsSmall, S: |
| vanSB       | C11 | 28.75 | 74.38 | 2    |                              |
| vanSC-01    | C11 |       |       |      | LowEfficiency, CtIsSmall, S: |
| vanSC-02    | C11 |       |       |      | NoAmplification              |
| vanTC-01    | C11 |       |       |      | LowEfficiency, CtIsSmall, S: |
| vanTC-02    | C11 |       |       |      | NoAmplification              |
| vanTE       | C11 |       |       |      | NoAmplification              |
| vanTG       | C11 |       |       |      | NoAmplification              |
| vanWB       | C11 |       |       |      | NoAmplification              |
| vanWG       | C11 | 35.99 | 74.89 | 1.95 |                              |
| vanXA       | C11 | 34.43 | 73.8  | 1.87 |                              |
| vanXB       | C11 |       |       |      | NoAmplification              |
| vanXD       | C11 | 30.22 | 76.04 | 2.01 |                              |

|              |     |       |       |      |                              |
|--------------|-----|-------|-------|------|------------------------------|
| vanYB        | C11 | 36.01 | 84.14 | 1.92 |                              |
| vanYD-01     | C11 | 31.75 | 82.34 | 1.81 |                              |
| vanYD-02     | C11 |       |       |      | CurveFitFailed               |
| vatB-01      | C11 |       |       |      | NoAmplification              |
| vatB-02      | C11 |       |       |      | CurveFitFailed               |
| vatC-01      | C11 |       |       |      | CurveFitFailed               |
| vatC-02      | C11 | 36.81 | 87.59 | 1.78 |                              |
| vatE-01      | C11 | 30.37 | 76.91 | 2.04 |                              |
| vatE-02      | C11 |       |       |      | NoAmplification              |
| vgaA-01      | C11 |       |       |      | LowEfficiency, CtIsSmall, S: |
| vgaA-02      | C11 |       |       |      | LowEfficiency, CtIsSmall, S: |
| vgb-01       | C11 |       |       |      | NoAmplification              |
| vgbB-01      | C11 |       |       |      | LowEfficiency, CtIsSmall, S: |
| vgbB-02      | C11 |       |       |      | NoAmplification              |
| yceE/mdtG-0  | C11 |       |       |      | LowEfficiency, CtIsSmall, Ci |
| yceE/mdtG-0  | C11 | 38.2  | 81.21 | 1.89 |                              |
| yceL/mdtH-0  | C11 | 31.08 | 85.71 | 1.97 |                              |
| yceL/mdtH-0  | C11 |       |       |      | LowEfficiency, CtIsSmall, Ci |
| yceL/mdtH-0  | C11 | 35.03 | 77.93 | 1.99 |                              |
| yidY/mdtL-01 | C11 | 33.09 | 80.47 | 2.01 | MultipleMeltPeaks            |
| yidY/mdtL-02 | C11 |       |       |      | CurveFitFailed               |

| Assay          | Sample | Ct | Tm    | Efficiency | Flags                  |
|----------------|--------|----|-------|------------|------------------------|
| 16S rRNA       | C12    |    | 20.95 | 82.05      | 1.99                   |
| aac            | C12    |    | 29.85 | 86.65      | 1.65 MultipleMeltPeaks |
| aac(6')-Ib(akz | C12    |    |       |            | NoAmplification        |
| aac(6')-Ib(akz | C12    |    | 30.26 | 86.26      | 1.98                   |
| aac(6')-Ib(akz | C12    |    | 30.95 | 76.51      | 2.03 MultipleMeltPeaks |
| aac(6')-II     | C12    |    | 36.67 | 81.2       | 1.58                   |
| aac(6')I1      | C12    |    |       |            | NoAmplification        |
| aacA/aphD      | C12    |    |       |            | NoAmplification        |
| aacC           | C12    |    | 30.71 | 91.83      | 1.94                   |
| aacC1          | C12    |    |       |            | NoAmplification        |
| aacC2          | C12    |    |       |            | NoAmplification        |
| aacC4          | C12    |    |       |            | NoAmplification        |
| aadA-01        | C12    |    |       |            | NoAmplification        |
| aadA-02        | C12    |    | 31.96 | 86.5       | 2 MultipleMeltPeaks    |
| aadA-1-01      | C12    |    | 34.07 | 81.38      | 2                      |
| aadA-1-02      | C12    |    |       |            | NoAmplification        |
| aadA1          | C12    |    | 34.77 | 83.89      | 2.07                   |
| aadA2-01       | C12    |    | 36.63 | 75.8       | 2.11 MultipleMeltPeaks |
| aadA2-02       | C12    |    | 33.53 | 75.21      | 2.04                   |
| aadA2-03       | C12    |    |       |            | NoAmplification        |
| aadA5-01       | C12    |    | 34.6  | 84.1       | 1.92 MultipleMeltPeaks |
| aadA5-02       | C12    |    | 35.65 | 84.35      | 2.06 MultipleMeltPeaks |
| aadA9-01       | C12    |    | 36.97 | 81.89      | 1.84 MultipleMeltPeaks |
| aadA9-02       | C12    |    |       |            | NoAmplification        |
| aadD           | C12    |    |       |            | NoAmplification        |
| aadE           | C12    |    | 30.52 | 72.32      | 2.08                   |
| acrA-01        | C12    |    | 30.69 | 88.86      | 1.97                   |
| acrA-02        | C12    |    |       |            | NoAmplification        |
| acrA-03        | C12    |    |       |            | NoAmplification        |
| acrA-04        | C12    |    | 30.82 | 81.01      | 1.94                   |
| acrA-05        | C12    |    | 29.58 | 87.89      | 2.01                   |
| acrB-01        | C12    |    | 37.5  | 75.38      | 2.03                   |
| acrF           | C12    |    | 30.61 | 84.61      | 1.79 MultipleMeltPeaks |
| acrR-01        | C12    |    | 33.65 | 80.89      | 1.95 MultipleMeltPeaks |
| acrR-02        | C12    |    | 33.13 | 85.93      | 1.89                   |
| Actin          | C12    |    | 20.09 | 86.88      | 1.99                   |
| adeA           | C12    |    |       |            | NoAmplification        |
| ampC-01        | C12    |    | 31.93 | 85.66      | 1.89                   |
| ampC-02        | C12    |    | 35.54 | 77.03      | 2.21                   |
| ampC-04        | C12    |    | 32.67 | 78.49      | 1.81                   |
| ampC-05        | C12    |    |       |            | NoAmplification        |
| ampC-06        | C12    |    | 33.11 | 72.09      | 1.71 MultipleMeltPeaks |
| ampC-07        | C12    |    | 31.91 | 88.4       | 1.91                   |
| ampC-09        | C12    |    |       |            | NoAmplification        |
| ampC/blaDH     | C12    |    | 30.78 | 85.05      | 1.95 MultipleMeltPeaks |

|                            |     |       |       |      |                             |
|----------------------------|-----|-------|-------|------|-----------------------------|
| aph                        | C12 |       |       |      | CurveFitFailed              |
| aph(2')-Id-01              | C12 |       |       |      | NoAmplification             |
| aph(2')-Id-02              | C12 |       |       |      | NoAmplification             |
| aph6ia                     | C12 |       |       |      | NoAmplification             |
| aphA1(aka k <sub>z</sub> ) | C12 |       |       |      | NoAmplification             |
| bacA-01                    | C12 |       |       |      | NoAmplification             |
| bacA-02                    | C12 | 34.77 | 88.19 | 1.74 |                             |
| BETA-globin                | C12 | 21.31 | 84.04 | 1.98 |                             |
| bla-ACC-1                  | C12 | 36.95 | 85.8  | 1.87 |                             |
| bla-L1                     | C12 | 29.7  | 84.42 | 2.01 |                             |
| bla1                       | C12 |       |       |      | NoAmplification             |
| blaCMY                     | C12 |       |       |      | NoAmplification             |
| blaCMY2-01                 | C12 | 31.55 | 80.86 | 1.88 |                             |
| blaCMY2-02                 | C12 | 30.3  | 82.88 | 1.9  | MultipleMeltPeaks           |
| blaCTX-M-01                | C12 | 37.84 | 84.72 | 1.91 |                             |
| blaCTX-M-02                | C12 | 37.29 | 80.07 | 1.78 | MultipleMeltPeaks           |
| blaCTX-M-03                | C12 |       |       |      | NoAmplification             |
| blaCTX-M-04                | C12 | 35.27 | 79.86 | 2.12 |                             |
| blaCTX-M-05                | C12 | 35.75 | 75.24 | 1.93 |                             |
| blaCTX-M-06                | C12 | 34.47 | 84.68 | 1.94 |                             |
| blaGES                     | C12 |       |       |      | NoAmplification             |
| blaIMP-01                  | C12 | 37.1  | 74.49 | 2.18 |                             |
| blaIMP-02                  | C12 |       |       |      | LowEfficiency, CtlsSmall, C |
| blaMOX/blaC                | C12 |       |       |      | NoAmplification             |
| blaOCH                     | C12 |       |       |      | NoAmplification             |
| blaOKP                     | C12 |       |       |      | NoAmplification             |
| blaOXA1/blaC               | C12 |       |       |      | NoAmplification             |
| blaOXA10-01                | C12 |       |       |      | CurveFitFailed              |
| blaOXA10-02                | C12 |       |       |      | NoAmplification             |
| blaOXY                     | C12 |       |       |      | NoAmplification             |
| blaPAO                     | C12 |       |       |      | NoAmplification             |
| blaPER                     | C12 |       |       |      | NoAmplification             |
| blaPSE                     | C12 |       |       |      | NoAmplification             |
| blaROB                     | C12 |       |       |      | NoAmplification             |
| blaSFO                     | C12 | 34.07 | 86.82 | 1.96 |                             |
| blaSHV-01                  | C12 |       |       |      | NoAmplification             |
| blaSHV-02                  | C12 | 34.78 | 83.86 | 2.09 |                             |
| blaTEM                     | C12 |       |       |      | NoAmplification             |
| blaTLA                     | C12 |       |       |      | CurveFitFailed              |
| blaVEB                     | C12 |       |       |      | NoAmplification             |
| blaVIM                     | C12 |       |       |      | NoAmplification             |
| blaZ                       | C12 |       |       |      | NoAmplification             |
| carB                       | C12 | 37.11 | 82.64 | 1.93 |                             |
| catA1                      | C12 |       |       |      | NoAmplification             |
| catB3                      | C12 | 32.26 | 87.52 | 2.05 |                             |
| catB8                      | C12 | 29.75 | 82.93 | 2.04 | MultipleMeltPeaks           |

|            |     |       |       |      |                              |
|------------|-----|-------|-------|------|------------------------------|
| ceoA       | C12 | 27.03 | 82.36 | 1.97 |                              |
| cepA       | C12 |       |       |      | NoAmplification              |
| cfiA       | C12 | 33.59 | 79.55 | 1.83 |                              |
| cfr        | C12 |       |       |      | CurveFitFailed               |
| cfxA       | C12 | 26.94 | 77.35 | 1.76 |                              |
| cmeA       | C12 | 36.56 | 78.54 | 1.99 |                              |
| cmlA1-01   | C12 |       |       |      | NoAmplification              |
| cmlA1-02   | C12 | 34.32 | 88.43 | 1.98 |                              |
| cmr        | C12 |       |       |      | NoAmplification              |
| cmx(A)     | C12 | 27.21 | 88.21 | 1.86 | MultipleMeltPeaks            |
| cphA-01    | C12 | 35.45 | 85.59 | 2.06 |                              |
| cphA-02    | C12 | 38.27 | 82.29 | 1.79 | MultipleMeltPeaks            |
| dfrA1      | C12 |       |       |      | NoAmplification              |
| dfrA12     | C12 |       |       |      | NoAmplification              |
| emrD       | C12 |       |       |      | NoAmplification              |
| ereA       | C12 | 32.72 | 82.64 | 1.99 |                              |
| ereB       | C12 |       |       |      | NoAmplification              |
| erm(34)    | C12 |       |       |      | NoAmplification              |
| erm(35)    | C12 |       |       |      | NoAmplification              |
| erm(36)    | C12 | 33.75 | 86.29 | 1.85 |                              |
| ermA       | C12 |       |       |      | LowEfficiency, CtIsSmall, Ct |
| ermA/ermTR | C12 |       |       |      | NoAmplification              |
| ermB       | C12 |       |       |      | NoAmplification              |
| ermC       | C12 | 33.7  | 85.44 | 1.99 |                              |
| ermF       | C12 |       |       |      | NoAmplification              |
| ermJ/ermD  | C12 |       |       |      | NoAmplification              |
| ermK-01    | C12 | 36.92 | 81.17 | 1.98 | MultipleMeltPeaks            |
| ermK-02    | C12 | 38.14 | 80.66 | 1.83 |                              |
| ermT-01    | C12 |       |       |      | NoAmplification              |
| ermT-02    | C12 | 35.55 | 89.09 | 1.93 | MultipleMeltPeaks            |
| ermX       | C12 |       |       |      | LowEfficiency, CtIsSmall, S: |
| ermY       | C12 |       |       |      | NoAmplification              |
| fabK       | C12 | 27.02 | 79.74 | 1.99 |                              |
| floR       | C12 |       |       |      | NoAmplification              |
| folA       | C12 | 34.02 | 76.54 | 2.05 |                              |
| fosB       | C12 |       |       |      | LowEfficiency, CtIsSmall, S: |
| fosX       | C12 |       |       |      | NoAmplification              |
| fox5       | C12 | 28.93 | 86.52 | 1.77 |                              |
| imiR       | C12 |       |       |      | NoAmplification              |
| ImrA-01    | C12 |       |       |      | NoAmplification              |
| intl       | C12 | 29.94 | 84.79 | 1.92 |                              |
| intl1      | C12 | 21.3  | 86.96 | 1.95 | MultipleMeltPeaks            |
| IS613      | C12 | 36.41 | 87.42 | 2.01 | MultipleMeltPeaks            |
| lnuA-01    | C12 |       |       |      | NoAmplification              |
| lnuB-01    | C12 |       |       |      | NoAmplification              |
| lnuB-02    | C12 |       |       |      | NoAmplification              |



|               |     |       |       |      |                              |
|---------------|-----|-------|-------|------|------------------------------|
| lnuC          | C12 | 37.32 | 84.09 | 1.67 |                              |
| marR-01       | C12 | 36.64 | 85.27 | 1.93 |                              |
| matA/mel      | C12 | 26.15 | 76.9  | 2.03 | MultipleMeltPeaks            |
| mdetI1        | C12 |       |       |      | NoAmplification              |
| mdtA          | C12 | 37.78 | 84.21 | 1.84 | MultipleMeltPeaks            |
| mdtE/yhiU     | C12 |       |       |      | NoAmplification              |
| mecA          | C12 |       |       |      | NoAmplification              |
| mefA          | C12 | 24.31 | 80.49 | 1.99 |                              |
| mepA          | C12 | 32.96 | 87.24 | 1.98 |                              |
| mexA          | C12 |       |       |      | LowEfficiency, CtIsSmall, Ci |
| mexD          | C12 | 32.82 | 82.49 | 2.07 | MultipleMeltPeaks            |
| mexE          | C12 |       |       |      | NoAmplification              |
| mexF          | C12 | 32.9  | 80.95 | 1.73 | MultipleMeltPeaks            |
| mphA-01       | C12 | 29.16 | 86.69 | 2.02 | MultipleMeltPeaks            |
| mphA-02       | C12 | 31.28 | 86.74 | 1.7  |                              |
| mphB          | C12 | 36.83 | 88.71 | 1.92 | MultipleMeltPeaks            |
| mphC          | C12 |       |       |      | NoAmplification              |
| msrA-01       | C12 |       |       |      | CurveFitFailed               |
| msrC-01       | C12 |       |       |      | NoAmplification              |
| mtrC-01       | C12 |       |       |      | NoAmplification              |
| mtrC-02       | C12 | 33.99 | 74.46 | 1.96 |                              |
| mtrD-02       | C12 | 28.34 | 81.79 | 1.89 |                              |
| mtrD-03       | C12 |       |       |      | NoAmplification              |
| NDM1          | C12 |       |       |      | NoAmplification              |
| nimE          | C12 | 34.09 | 75.7  | 1.98 |                              |
| nisB          | C12 | 37.61 | 78.07 | 1.9  |                              |
| oleC          | C12 |       |       |      | NoAmplification              |
| oprD          | C12 | 30.67 | 81.98 | 1.99 |                              |
| oprJ          | C12 |       |       |      | NoAmplification              |
| pbp           | C12 |       |       |      | NoAmplification              |
| pbp2x         | C12 |       |       |      | NoAmplification              |
| Pbp5          | C12 |       |       |      | NoAmplification              |
| penA          | C12 |       |       |      | NoAmplification              |
| pikR1         | C12 | 36.93 | 84.31 | 1.79 | MultipleMeltPeaks            |
| pikR2         | C12 | 31.32 | 84.62 | 1.85 |                              |
| pmrA          | C12 | 28.98 | 79.04 | 2.06 |                              |
| pncA          | C12 | 32.04 | 84.76 | 1.88 |                              |
| putative mulI | C12 |       |       |      | NoAmplification              |
| qac           | C12 |       |       |      | NoAmplification              |
| qacA          | C12 |       |       |      | NoAmplification              |
| qacA/qacB     | C12 |       |       |      | NoAmplification              |
| qacEdelta1-0  | C12 |       |       |      | NoAmplification              |
| qacEdelta1-0  | C12 | 30.45 | 76.82 | 1.91 |                              |
| qacH-01       | C12 | 36.67 | 86.85 | 1.94 |                              |
| qacH-02       | C12 | 35.18 | 83.94 | 1.66 |                              |
| qnrA          | C12 |       |       |      | NoAmplification              |

|              |     |       |       |      |                              |
|--------------|-----|-------|-------|------|------------------------------|
| rarD-02      | C12 | 36.17 | 85.86 | 2.04 |                              |
| sat4         | C12 |       |       |      | NoAmplification              |
| sdeB         | C12 |       |       |      | NoAmplification              |
| spcN-01      | C12 |       |       |      | NoAmplification              |
| speA         | C12 |       |       |      | NoAmplification              |
| str          | C12 |       |       |      | NoAmplification              |
| strA         | C12 |       |       |      | CurveFitFailed               |
| strB         | C12 | 29.63 | 83.91 | 1.92 |                              |
| sul1         | C12 |       |       |      | NoAmplification              |
| sul2         | C12 |       |       |      | NoAmplification              |
| sulA/foIP-01 | C12 | 25.66 | 81.59 | 2.04 |                              |
| sulA/foIP-03 | C12 | 26.02 | 83.22 | 2.02 |                              |
| tet(32)      | C12 |       |       |      | NoAmplification              |
| tet(34)      | C12 | 30.14 | 75.76 | 2.01 |                              |
| tet(35)      | C12 |       |       |      | NoAmplification              |
| tet(36)-A    | C12 | 38.44 | 87.52 | 1.71 | MultipleMeltPeaks            |
| tet(36)-B    | C12 |       |       |      | NoAmplification              |
| tet(37)      | C12 | 34.52 | 87.86 | 1.93 |                              |
| tetA-01      | C12 | 31.38 | 85.07 | 1.96 |                              |
| tetA-02      | C12 | 34.76 | 81.68 | 1.97 |                              |
| tetB-01      | C12 | 33.8  | 89.47 | 2    |                              |
| tetB-02      | C12 |       |       |      | CurveFitFailed               |
| tetC-01      | C12 |       |       |      | NoAmplification              |
| tetC-02      | C12 |       |       |      | LowEfficiency, CtIsSmall, Ct |
| tetD-01      | C12 |       |       |      | NoAmplification              |
| tetD-02      | C12 |       |       |      | NoAmplification              |
| tetE         | C12 |       |       |      | NoAmplification              |
| tetG-01      | C12 |       |       |      | LowEfficiency, CtIsSmall, S: |
| tetG-02      | C12 | 37.36 | 74.09 | 2.02 |                              |
| tetH         | C12 |       |       |      | NoAmplification              |
| tetJ         | C12 |       |       |      | NoAmplification              |
| tetK         | C12 |       |       |      | NoAmplification              |
| tetL-01      | C12 |       |       |      | NoAmplification              |
| tetL-02      | C12 | 36.71 | 85.41 | 1.66 |                              |
| tetM-01      | C12 | 25.92 | 75.92 | 2.01 |                              |
| tetM-02      | C12 | 25.83 | 77.36 | 2.09 |                              |
| tetO-01      | C12 |       |       |      | NoAmplification              |
| tetPA        | C12 |       |       |      | NoAmplification              |
| tetPB-01     | C12 | 37.25 | 85.52 | 1.98 | MultipleMeltPeaks            |
| tetPB-02     | C12 | 30.72 | 85.15 | 1.91 |                              |
| tetPB-03     | C12 |       |       |      | NoAmplification              |
| tetPB-05     | C12 |       |       |      | NoAmplification              |
| tetQ         | C12 | 28.04 | 77.15 | 2.03 |                              |
| tetR-02      | C12 | 32.9  | 89.08 | 1.93 |                              |
| tetR-03      | C12 |       |       |      | NoAmplification              |
| tetS         | C12 |       |       |      | LowEfficiency, CtIsSmall, S: |

|             |     |       |       |      |                              |
|-------------|-----|-------|-------|------|------------------------------|
| tetT        | C12 |       |       |      | NoAmplification              |
| tetU-01     | C12 |       |       |      | LowEfficiency, CtIsSmall, Ci |
| tetV        | C12 |       |       |      | NoAmplification              |
| tetW-01     | C12 | 27.9  | 81.72 | 2    |                              |
| tetX        | C12 |       |       |      | BadR2, CtIsSmall, Saturatio  |
| tnpA-01     | C12 |       |       |      | NoAmplification              |
| tnpA-02     | C12 | 32.05 | 84.77 | 1.89 |                              |
| tnpA-03     | C12 | 31.64 | 75.24 | 2.05 |                              |
| tnpA-04     | C12 |       |       |      | LowEfficiency, CtIsSmall, Ci |
| tnpA-05     | C12 |       |       |      | NoAmplification              |
| tnpA-07     | C12 |       |       |      | NoAmplification              |
| tolC-01     | C12 |       |       |      | NoAmplification              |
| tolC-02     | C12 | 30.14 | 83.7  | 1.99 | MultipleMeltPeaks            |
| tolC-03     | C12 | 29.39 | 85.89 | 1.99 |                              |
| Tp614       | C12 |       |       |      | CtIsSmall, CurveFitFailed, F |
| ttgA        | C12 |       |       |      | NoAmplification              |
| ttgB        | C12 | 34.55 | 86.43 | 2.03 |                              |
| vanA        | C12 |       |       |      | NoAmplification              |
| vanB-01     | C12 | 36.27 | 78.05 | 1.67 |                              |
| vanC-01     | C12 |       |       |      | NoAmplification              |
| vanC-02     | C12 |       |       |      | NoAmplification              |
| vanC-03     | C12 | 28.64 | 85.88 | 1.83 |                              |
| vanC1       | C12 |       |       |      | NoAmplification              |
| vanC2/vanC3 | C12 | 34.27 | 79.43 | 1.85 | MultipleMeltPeaks            |
| vanG        | C12 |       |       |      | BadR2, CtIsSmall, Saturatio  |
| vanHB       | C12 | 36.77 | 78.44 | 2.19 |                              |
| vanHD       | C12 |       |       |      | NoAmplification              |
| vanRA-01    | C12 |       |       |      | NoAmplification              |
| vanRA-02    | C12 |       |       |      | NoAmplification              |
| vanRB       | C12 | 33.42 | 80.77 | 2    |                              |
| vanRC       | C12 |       |       |      | NoAmplification              |
| vanRC4      | C12 |       |       |      | NoAmplification              |
| vanRD       | C12 |       |       |      | NoAmplification              |
| vanSA       | C12 |       |       |      | NoAmplification              |
| vanSB       | C12 | 31.34 | 74.07 | 1.9  |                              |
| vanSC-01    | C12 | 37.19 | 84.1  | 1.94 |                              |
| vanSC-02    | C12 |       |       |      | NoAmplification              |
| vanTC-01    | C12 |       |       |      | NoAmplification              |
| vanTC-02    | C12 |       |       |      | NoAmplification              |
| vanTE       | C12 |       |       |      | NoAmplification              |
| vanTG       | C12 |       |       |      | NoAmplification              |
| vanWB       | C12 |       |       |      | NoAmplification              |
| vanWG       | C12 |       |       |      | NoAmplification              |
| vanXA       | C12 | 38.35 | 74.23 | 1.92 |                              |
| vanXB       | C12 |       |       |      | NoAmplification              |
| vanXD       | C12 | 32.51 | 75.28 | 2.01 |                              |

|              |     |       |       |      |                              |
|--------------|-----|-------|-------|------|------------------------------|
| vanYB        | C12 | 35.51 | 86.29 | 2.05 |                              |
| vanYD-01     | C12 | 32.01 | 82.28 | 1.75 |                              |
| vanYD-02     | C12 |       |       |      | NoAmplification              |
| vatB-01      | C12 |       |       |      | NoAmplification              |
| vatB-02      | C12 | 34.79 | 82.07 | 2.04 |                              |
| vatC-01      | C12 |       |       |      | NoAmplification              |
| vatC-02      | C12 | 35.1  | 83.13 | 1.97 | MultipleMeltPeaks            |
| vatE-01      | C12 | 29.06 | 76.69 | 2.15 |                              |
| vatE-02      | C12 |       |       |      | NoAmplification              |
| vgaA-01      | C12 |       |       |      | NoAmplification              |
| vgaA-02      | C12 |       |       |      | NoAmplification              |
| vgb-01       | C12 | 37.77 | 82.4  | 1.91 | MultipleMeltPeaks            |
| vgbB-01      | C12 |       |       |      | NoAmplification              |
| vgbB-02      | C12 |       |       |      | NoAmplification              |
| yceE/mdtG-0  | C12 | 34.76 | 81.84 | 2.07 |                              |
| yceE/mdtG-0  | C12 |       |       |      | LowEfficiency, CtIsSmall, Ci |
| yceL/mdtH-0  | C12 | 32.87 | 85.84 | 1.96 | MultipleMeltPeaks            |
| yceL/mdtH-0  | C12 |       |       |      | CurveFitFailed               |
| yceL/mdtH-0  | C12 |       |       |      | LowEfficiency, CtIsSmall, Ci |
| yidY/mdtL-01 | C12 | 29.77 | 82.63 | 2.01 |                              |
| yidY/mdtL-02 | C12 |       |       |      | CurveFitFailed               |

| Assay           | Sample | Ct | Tm    | Efficiency | Flags                  |
|-----------------|--------|----|-------|------------|------------------------|
| 16S rRNA        | C13    |    | 20.6  | 82.11      | 1.97                   |
| aac             | C13    |    | 32.05 | 90.3       | 1.58                   |
| aac(6')-Ib(akz) | C13    |    |       |            | NoAmplification        |
| aac(6')-Ib(akz) | C13    |    | 37.47 | 79.28      | 1.79                   |
| aac(6')-Ib(akz) | C13    |    | 38.01 | 79.28      | 1.84                   |
| aac(6')-II      | C13    |    | 32.31 | 84.45      | 1.99                   |
| aac(6')I1       | C13    |    |       |            | NoAmplification        |
| aacA/aphD       | C13    |    |       |            | NoAmplification        |
| aacC            | C13    |    | 32.48 | 92.32      | 1.86                   |
| aacC1           | C13    |    |       |            | NoAmplification        |
| aacC2           | C13    |    |       |            | NoAmplification        |
| aacC4           | C13    |    |       |            | NoAmplification        |
| aadA-01         | C13    |    |       |            | NoAmplification        |
| aadA-02         | C13    |    |       |            | NoAmplification        |
| aadA-1-01       | C13    |    |       |            | NoAmplification        |
| aadA-1-02       | C13    |    |       |            | NoAmplification        |
| aadA1           | C13    |    | 38.31 | 84.44      | 1.79                   |
| aadA2-01        | C13    |    |       |            | NoAmplification        |
| aadA2-02        | C13    |    |       |            | NoAmplification        |
| aadA2-03        | C13    |    |       |            | NoAmplification        |
| aadA5-01        | C13    |    |       |            | CurveFitFailed         |
| aadA5-02        | C13    |    |       |            | NoAmplification        |
| aadA9-01        | C13    |    |       |            | CurveFitFailed         |
| aadA9-02        | C13    |    |       |            | NoAmplification        |
| aadD            | C13    |    |       |            | NoAmplification        |
| aadE            | C13    |    |       |            | NoAmplification        |
| acrA-01         | C13    |    |       |            | NoAmplification        |
| acrA-02         | C13    |    |       |            | NoAmplification        |
| acrA-03         | C13    |    |       |            | NoAmplification        |
| acrA-04         | C13    |    | 36.95 | 80.83      | 1.9 MultipleMeltPeaks  |
| acrA-05         | C13    |    | 30.4  | 82.1       | 1.94 MultipleMeltPeaks |
| acrB-01         | C13    |    |       |            | NoAmplification        |
| acrF            | C13    |    | 38.95 | 81.9       | 1.78 MultipleMeltPeaks |
| acrR-01         | C13    |    | 41.45 | 61.63      | 1.58 MultipleMeltPeaks |
| acrR-02         | C13    |    | 37.69 | 87.03      | 1.76                   |
| Actin           | C13    |    | 23.71 | 86.99      | 1.94 MultipleMeltPeaks |
| adeA            | C13    |    |       |            | NoAmplification        |
| ampC-01         | C13    |    | 35.44 | 80.23      | 1.97                   |
| ampC-02         | C13    |    |       |            | NoAmplification        |
| ampC-04         | C13    |    | 36.18 | 77.13      | 2.1                    |
| ampC-05         | C13    |    |       |            | NoAmplification        |
| ampC-06         | C13    |    |       |            | NoAmplification        |
| ampC-07         | C13    |    | 36.91 | 88.3       | 1.76                   |
| ampC-09         | C13    |    |       |            | NoAmplification        |
| ampC/blaDH      | C13    |    | 34.44 | 76.51      | 1.94 MultipleMeltPeaks |

|                          |     |       |       |      |                   |
|--------------------------|-----|-------|-------|------|-------------------|
| aph                      | C13 |       |       |      | NoAmplification   |
| aph(2')-Id-01            | C13 |       |       |      | NoAmplification   |
| aph(2')-Id-02            | C13 |       |       |      | NoAmplification   |
| aph6ia                   | C13 |       |       |      | NoAmplification   |
| aphA1(aka k <sub>z</sub> | C13 |       |       |      | NoAmplification   |
| bacA-01                  | C13 |       |       |      | NoAmplification   |
| bacA-02                  | C13 | 33.72 | 83.22 | 1.79 |                   |
| BETA-globin              | C13 | 25.56 | 84.12 | 1.99 |                   |
| bla-ACC-1                | C13 | 36.16 | 80.3  | 1.77 |                   |
| bla-L1                   | C13 | 32.66 | 84.87 | 1.96 |                   |
| bla1                     | C13 |       |       |      | NoAmplification   |
| blaCMY                   | C13 |       |       |      | NoAmplification   |
| blaCMY2-01               | C13 |       |       |      | NoAmplification   |
| blaCMY2-02               | C13 | 34.15 | 89.58 | 1.88 | MultipleMeltPeaks |
| blaCTX-M-01              | C13 |       |       |      | NoAmplification   |
| blaCTX-M-02              | C13 |       |       |      | NoAmplification   |
| blaCTX-M-03              | C13 |       |       |      | NoAmplification   |
| blaCTX-M-04              | C13 | 35.03 | 77.86 | 1.96 |                   |
| blaCTX-M-05              | C13 |       |       |      | NoAmplification   |
| blaCTX-M-06              | C13 |       |       |      | NoAmplification   |
| blaGES                   | C13 |       |       |      | NoAmplification   |
| blaIMP-01                | C13 |       |       |      | NoAmplification   |
| blaIMP-02                | C13 |       |       |      | NoAmplification   |
| blaMOX/blaC              | C13 |       |       |      | NoAmplification   |
| blaOCH                   | C13 |       |       |      | NoAmplification   |
| blaOKP                   | C13 |       |       |      | NoAmplification   |
| blaOXA1/blaC             | C13 |       |       |      | NoAmplification   |
| blaOXA10-01              | C13 |       |       |      | NoAmplification   |
| blaOXA10-02              | C13 |       |       |      | NoAmplification   |
| blaOXY                   | C13 |       |       |      | NoAmplification   |
| blaPAO                   | C13 |       |       |      | NoAmplification   |
| blaPER                   | C13 |       |       |      | NoAmplification   |
| blaPSE                   | C13 |       |       |      | NoAmplification   |
| blaROB                   | C13 |       |       |      | NoAmplification   |
| blaSFO                   | C13 | 34.53 | 84.77 | 1.92 | MultipleMeltPeaks |
| blaSHV-01                | C13 |       |       |      | NoAmplification   |
| blaSHV-02                | C13 |       |       |      | NoAmplification   |
| blaTEM                   | C13 | 24.09 | 79.49 | 1.85 |                   |
| blaTLA                   | C13 |       |       |      | NoAmplification   |
| blaVEB                   | C13 |       |       |      | NoAmplification   |
| blaVIM                   | C13 |       |       |      | NoAmplification   |
| blaZ                     | C13 |       |       |      | NoAmplification   |
| carB                     | C13 |       |       |      | NoAmplification   |
| catA1                    | C13 |       |       |      | NoAmplification   |
| catB3                    | C13 |       |       |      | NoAmplification   |
| catB8                    | C13 | 32.85 | 81.67 | 1.95 |                   |

|            |     |       |       |      |                              |
|------------|-----|-------|-------|------|------------------------------|
| ceoA       | C13 | 30.58 | 83.68 | 1.91 |                              |
| cepA       | C13 |       |       |      | NoAmplification              |
| cfiA       | C13 |       |       |      | NoAmplification              |
| cfr        | C13 |       |       |      | NoAmplification              |
| cfxA       | C13 | 24.84 | 77.53 | 1.96 |                              |
| cmeA       | C13 |       |       |      | NoAmplification              |
| cmlA1-01   | C13 | 38.45 | 87.26 | 1.8  |                              |
| cmlA1-02   | C13 | 37.41 | 81.97 | 1.87 |                              |
| cmr        | C13 |       |       |      | NoAmplification              |
| cmx(A)     | C13 | 30.51 | 84.54 | 1.94 | MultipleMeltPeaks            |
| cphA-01    | C13 | 32.66 | 85.73 | 1.87 |                              |
| cphA-02    | C13 |       |       |      | CurveFitFailed               |
| dfrA1      | C13 |       |       |      | NoAmplification              |
| dfrA12     | C13 |       |       |      | NoAmplification              |
| emrD       | C13 |       |       |      | NoAmplification              |
| ereA       | C13 |       |       |      | NoAmplification              |
| ereB       | C13 |       |       |      | NoAmplification              |
| erm(34)    | C13 |       |       |      | NoAmplification              |
| erm(35)    | C13 |       |       |      | NoAmplification              |
| erm(36)    | C13 |       |       |      | NoAmplification              |
| ermA       | C13 |       |       |      | NoAmplification              |
| ermA/ermTR | C13 |       |       |      | NoAmplification              |
| ermB       | C13 |       |       |      | NoAmplification              |
| ermC       | C13 |       |       |      | NoAmplification              |
| ermF       | C13 |       |       |      | NoAmplification              |
| ermJ/ermD  | C13 |       |       |      | NoAmplification              |
| ermK-01    | C13 |       |       |      | NoAmplification              |
| ermK-02    | C13 |       |       |      | NoAmplification              |
| ermT-01    | C13 |       |       |      | NoAmplification              |
| ermT-02    | C13 |       |       |      | NoAmplification              |
| ermX       | C13 |       |       |      | NoAmplification              |
| ermY       | C13 |       |       |      | NoAmplification              |
| fabK       | C13 | 28.04 | 79.24 | 2.01 |                              |
| floR       | C13 |       |       |      | NoAmplification              |
| folA       | C13 |       |       |      | NoAmplification              |
| fosB       | C13 |       |       |      | LowEfficiency, CtIsSmall, S: |
| fosX       | C13 |       |       |      | NoAmplification              |
| fox5       | C13 | 35.52 | 86.66 | 1.91 |                              |
| imiR       | C13 |       |       |      | NoAmplification              |
| ImrA-01    | C13 | 42.27 | 61.92 | 1.67 | MultipleMeltPeaks            |
| intl       | C13 | 31.54 | 84.69 | 1.93 |                              |
| intl1      | C13 | 24.29 | 86.83 | 1.94 | MultipleMeltPeaks            |
| IS613      | C13 | 26.04 | 79.41 | 2.06 |                              |
| lnuA-01    | C13 |       |       |      | NoAmplification              |
| lnuB-01    | C13 |       |       |      | NoAmplification              |
| lnuB-02    | C13 |       |       |      | NoAmplification              |

|               |     |       |       |      |                   |
|---------------|-----|-------|-------|------|-------------------|
| lnuC          | C13 |       |       |      | CurveFitFailed    |
| marR-01       | C13 | 38.86 | 84.71 | 1.82 |                   |
| matA/mel      | C13 | 26.88 | 77.46 | 2.02 |                   |
| mdet1         | C13 |       |       |      | NoAmplification   |
| mdtA          | C13 | 37.33 | 86.25 | 1.7  |                   |
| mdtE/yhiU     | C13 |       |       |      | NoAmplification   |
| mecA          | C13 |       |       |      | NoAmplification   |
| mefA          | C13 | 26.37 | 80.54 | 1.96 |                   |
| mepA          | C13 | 39.66 | 88.46 | 1.71 | MultipleMeltPeaks |
| mexA          | C13 |       |       |      | NoAmplification   |
| mexD          | C13 |       |       |      | NoAmplification   |
| mexE          | C13 |       |       |      | NoAmplification   |
| mexF          | C13 | 30.05 | 81.62 | 1.79 |                   |
| mphA-01       | C13 | 32.63 | 80.67 | 1.96 |                   |
| mphA-02       | C13 | 34.32 | 86.76 | 2.03 |                   |
| mphB          | C13 |       |       |      | CurveFitFailed    |
| mphC          | C13 |       |       |      | NoAmplification   |
| msrA-01       | C13 |       |       |      | NoAmplification   |
| msrC-01       | C13 |       |       |      | NoAmplification   |
| mtrC-01       | C13 |       |       |      | NoAmplification   |
| mtrC-02       | C13 | 37.91 | 80.57 | 1.87 |                   |
| mtrD-02       | C13 | 29.55 | 81.36 | 1.86 | MultipleMeltPeaks |
| mtrD-03       | C13 |       |       |      | NoAmplification   |
| NDM1          | C13 |       |       |      | NoAmplification   |
| nimE          | C13 | 38.16 | 74.46 | 2.04 |                   |
| nisB          | C13 |       |       |      | NoAmplification   |
| oleC          | C13 |       |       |      | NoAmplification   |
| oprD          | C13 | 33.54 | 81.48 | 1.96 |                   |
| oprJ          | C13 |       |       |      | NoAmplification   |
| pbp           | C13 |       |       |      | NoAmplification   |
| pbp2x         | C13 | 28.76 | 75.29 | 1.85 |                   |
| Pbp5          | C13 |       |       |      | NoAmplification   |
| penA          | C13 |       |       |      | NoAmplification   |
| pikR1         | C13 |       |       |      | NoAmplification   |
| pikR2         | C13 | 37.01 | 84.65 | 1.77 | MultipleMeltPeaks |
| pmrA          | C13 | 28.91 | 79.53 | 2.05 |                   |
| pncA          | C13 | 29.42 | 88.81 | 1.94 |                   |
| putative mulI | C13 | 38.05 | 77.47 | 1.96 | MultipleMeltPeaks |
| qac           | C13 |       |       |      | NoAmplification   |
| qacA          | C13 | 35.79 | 70.45 | 1.76 |                   |
| qacA/qacB     | C13 |       |       |      | NoAmplification   |
| qacEdelta1-0  | C13 |       |       |      | NoAmplification   |
| qacEdelta1-0  | C13 | 38.61 | 84.14 | 1.88 | MultipleMeltPeaks |
| qacH-01       | C13 | 37.59 | 84.07 | 1.94 |                   |
| qacH-02       | C13 | 37.57 | 83.7  | 1.68 |                   |
| qnrA          | C13 |       |       |      | NoAmplification   |



|              |     |       |       |      |                   |
|--------------|-----|-------|-------|------|-------------------|
| rarD-02      | C13 |       |       |      | NoAmplification   |
| sat4         | C13 |       |       |      | NoAmplification   |
| sdeB         | C13 |       |       |      | NoAmplification   |
| spcN-01      | C13 |       |       |      | NoAmplification   |
| speA         | C13 |       |       |      | NoAmplification   |
| str          | C13 |       |       |      | NoAmplification   |
| strA         | C13 |       |       |      | NoAmplification   |
| strB         | C13 | 24.9  | 84.23 | 1.95 |                   |
| sul1         | C13 |       |       |      | NoAmplification   |
| sul2         | C13 | 26.46 | 86.27 | 2.01 |                   |
| sulA/foIP-01 | C13 | 27.62 | 81.56 | 2.02 |                   |
| sulA/foIP-03 | C13 | 25.49 | 83.05 | 1.99 |                   |
| tet(32)      | C13 | 28.49 | 81    | 1.99 |                   |
| tet(34)      | C13 | 28.67 | 76.01 | 2.02 |                   |
| tet(35)      | C13 |       |       |      | NoAmplification   |
| tet(36)-A    | C13 |       |       |      | NoAmplification   |
| tet(36)-B    | C13 |       |       |      | NoAmplification   |
| tet(37)      | C13 | 38.37 | 75.66 | 1.8  | MultipleMeltPeaks |
| tetA-01      | C13 | 31.71 | 85.07 | 1.92 |                   |
| tetA-02      | C13 |       |       |      | NoAmplification   |
| tetB-01      | C13 | 29.76 | 79.4  | 1.96 |                   |
| tetB-02      | C13 | 37.56 | 61.46 | 1.78 | MultipleMeltPeaks |
| tetC-01      | C13 |       |       |      | NoAmplification   |
| tetC-02      | C13 |       |       |      | NoAmplification   |
| tetD-01      | C13 |       |       |      | NoAmplification   |
| tetD-02      | C13 | 36.42 | 76.47 | 2.01 |                   |
| tetE         | C13 |       |       |      | NoAmplification   |
| tetG-01      | C13 | 34.01 | 85.5  | 1.87 |                   |
| tetG-02      | C13 |       |       |      | NoAmplification   |
| tetH         | C13 |       |       |      | NoAmplification   |
| tetJ         | C13 |       |       |      | NoAmplification   |
| tetK         | C13 |       |       |      | NoAmplification   |
| tetL-01      | C13 |       |       |      | NoAmplification   |
| tetL-02      | C13 | 33.92 | 83.9  | 1.93 |                   |
| tetM-01      | C13 | 25.83 | 76.06 | 2    |                   |
| tetM-02      | C13 | 25.54 | 77.64 | 2.03 |                   |
| tetO-01      | C13 |       |       |      | NoAmplification   |
| tetPA        | C13 |       |       |      | NoAmplification   |
| tetPB-01     | C13 |       |       |      | NoAmplification   |
| tetPB-02     | C13 | 38.01 | 76.24 | 1.93 |                   |
| tetPB-03     | C13 |       |       |      | NoAmplification   |
| tetPB-05     | C13 |       |       |      | NoAmplification   |
| tetQ         | C13 | 27.13 | 76.86 | 2.02 |                   |
| tetR-02      | C13 | 37.52 | 88.64 | 1.73 | MultipleMeltPeaks |
| tetR-03      | C13 |       |       |      | NoAmplification   |
| tetS         | C13 |       |       |      | NoAmplification   |

|             |     |       |       |      |                   |
|-------------|-----|-------|-------|------|-------------------|
| tetT        | C13 |       |       |      | NoAmplification   |
| tetU-01     | C13 |       |       |      | NoAmplification   |
| tetV        | C13 |       |       |      | NoAmplification   |
| tetW-01     | C13 | 27.06 | 81.71 | 1.98 |                   |
| tetX        | C13 |       |       |      | NoAmplification   |
| tnpA-01     | C13 |       |       |      | NoAmplification   |
| tnpA-02     | C13 |       |       |      | NoAmplification   |
| tnpA-03     | C13 | 37.12 | 73.6  | 2.01 |                   |
| tnpA-04     | C13 |       |       |      | NoAmplification   |
| tnpA-05     | C13 | 25.62 | 80.9  | 1.93 |                   |
| tnpA-07     | C13 |       |       |      | NoAmplification   |
| tolC-01     | C13 |       |       |      | NoAmplification   |
| tolC-02     | C13 | 31.72 | 85.42 | 1.89 |                   |
| tolC-03     | C13 | 34.81 | 85.97 | 1.91 |                   |
| Tp614       | C13 |       |       |      | NoAmplification   |
| ttgA        | C13 |       |       |      | NoAmplification   |
| ttgB        | C13 | 37.55 | 84.85 | 1.83 | MultipleMeltPeaks |
| vanA        | C13 |       |       |      | NoAmplification   |
| vanB-01     | C13 |       |       |      | NoAmplification   |
| vanC-01     | C13 |       |       |      | NoAmplification   |
| vanC-02     | C13 |       |       |      | NoAmplification   |
| vanC-03     | C13 | 34.45 | 86.09 | 1.89 |                   |
| vanC1       | C13 |       |       |      | NoAmplification   |
| vanC2/vanC3 | C13 | 36.55 | 76.43 | 2    |                   |
| vanG        | C13 |       |       |      | NoAmplification   |
| vanHB       | C13 |       |       |      | NoAmplification   |
| vanHD       | C13 |       |       |      | NoAmplification   |
| vanRA-01    | C13 |       |       |      | NoAmplification   |
| vanRA-02    | C13 |       |       |      | NoAmplification   |
| vanRB       | C13 | 35.42 | 87.49 | 1.86 |                   |
| vanRC       | C13 |       |       |      | NoAmplification   |
| vanRC4      | C13 |       |       |      | NoAmplification   |
| vanRD       | C13 |       |       |      | NoAmplification   |
| vanSA       | C13 |       |       |      | NoAmplification   |
| vanSB       | C13 | 29.85 | 74.27 | 2.02 |                   |
| vanSC-01    | C13 | 30.98 | 84.03 | 1.93 |                   |
| vanSC-02    | C13 |       |       |      | NoAmplification   |
| vanTC-01    | C13 |       |       |      | NoAmplification   |
| vanTC-02    | C13 |       |       |      | NoAmplification   |
| vanTE       | C13 |       |       |      | NoAmplification   |
| vanTG       | C13 |       |       |      | NoAmplification   |
| vanWB       | C13 |       |       |      | NoAmplification   |
| vanWG       | C13 | 38.27 | 74.1  | 1.9  |                   |
| vanXA       | C13 | 38    | 73.51 | 1.74 |                   |
| vanXB       | C13 |       |       |      | NoAmplification   |
| vanXD       | C13 | 31.33 | 75.96 | 2.03 |                   |

|              |     |       |       |      |                 |
|--------------|-----|-------|-------|------|-----------------|
| vanYB        | C13 |       |       |      | NoAmplification |
| vanYD-01     | C13 | 37.3  | 81.27 | 1.78 |                 |
| vanYD-02     | C13 |       |       |      | NoAmplification |
| vatB-01      | C13 |       |       |      | NoAmplification |
| vatB-02      | C13 |       |       |      | NoAmplification |
| vatC-01      | C13 |       |       |      | NoAmplification |
| vatC-02      | C13 |       |       |      | NoAmplification |
| vatE-01      | C13 | 28.67 | 76.05 | 2.13 |                 |
| vatE-02      | C13 |       |       |      | NoAmplification |
| vgaA-01      | C13 |       |       |      | NoAmplification |
| vgaA-02      | C13 |       |       |      | NoAmplification |
| vgb-01       | C13 |       |       |      | NoAmplification |
| vgbB-01      | C13 |       |       |      | NoAmplification |
| vgbB-02      | C13 |       |       |      | NoAmplification |
| yceE/mdtG-0  | C13 |       |       |      | NoAmplification |
| yceE/mdtG-0  | C13 |       |       |      | NoAmplification |
| yceL/mdtH-0  | C13 |       |       |      | CurveFitFailed  |
| yceL/mdtH-0  | C13 |       |       |      | NoAmplification |
| yceL/mdtH-0  | C13 |       |       |      | NoAmplification |
| yidY/mdtL-01 | C13 | 36.28 | 84.58 | 1.9  |                 |
| yidY/mdtL-02 | C13 |       |       |      | NoAmplification |

| Assay          | Sample | Ct | Tm    | Efficiency | Flags                  |
|----------------|--------|----|-------|------------|------------------------|
| 16S rRNA       | C14    |    | 18.15 | 82.21      | 1.98                   |
| aac            | C14    |    | 33.06 | 80.95      | 1.79                   |
| aac(6')-Ib(akz | C14    |    |       |            | NoAmplification        |
| aac(6')-Ib(akz | C14    |    | 31.59 | 79.88      | 1.96                   |
| aac(6')-Ib(akz | C14    |    | 31.56 | 76.83      | 2.02                   |
| aac(6')-II     | C14    |    | 39.39 | 81.49      | 1.55 MultipleMeltPeaks |
| aac(6')I1      | C14    |    | 39.17 | 62.43      | 1.7 MultipleMeltPeaks  |
| aacA/aphD      | C14    |    |       |            | NoAmplification        |
| aacC           | C14    |    | 31.91 | 87.13      | 1.97 MultipleMeltPeaks |
| aacC1          | C14    |    |       |            | NoAmplification        |
| aacC2          | C14    |    | 31.46 | 83.56      | 1.99                   |
| aacC4          | C14    |    |       |            | NoAmplification        |
| aadA-01        | C14    |    |       |            | NoAmplification        |
| aadA-02        | C14    |    | 38.25 | 80.74      | 1.84                   |
| aadA-1-01      | C14    |    |       |            | NoAmplification        |
| aadA-1-02      | C14    |    |       |            | NoAmplification        |
| aadA1          | C14    |    | 37.83 | 85.17      | 1.81                   |
| aadA2-01       | C14    |    |       |            | NoAmplification        |
| aadA2-02       | C14    |    |       |            | NoAmplification        |
| aadA2-03       | C14    |    |       |            | NoAmplification        |
| aadA5-01       | C14    |    | 38.47 | 89.1       | 1.73 MultipleMeltPeaks |
| aadA5-02       | C14    |    | 36.22 | 84.3       | 1.92                   |
| aadA9-01       | C14    |    | 32.22 | 89.5       | 1.93                   |
| aadA9-02       | C14    |    |       |            | NoAmplification        |
| aadD           | C14    |    |       |            | NoAmplification        |
| aadE           | C14    |    |       |            | CurveFitFailed         |
| acrA-01        | C14    |    | 34.26 | 85.94      | 1.96 MultipleMeltPeaks |
| acrA-02        | C14    |    | 37.99 | 87.78      | 1.84                   |
| acrA-03        | C14    |    |       |            | CurveFitFailed         |
| acrA-04        | C14    |    | 31.36 | 81.17      | 1.96                   |
| acrA-05        | C14    |    | 31.05 | 88.76      | 1.97 MultipleMeltPeaks |
| acrB-01        | C14    |    | 34.84 | 87.08      | 1.91                   |
| acrF           | C14    |    | 29.46 | 82.85      | 1.73                   |
| acrR-01        | C14    |    | 38.33 | 61.84      | 1.8 MultipleMeltPeaks  |
| acrR-02        | C14    |    | 41.11 | 64.93      | 1.62 MultipleMeltPeaks |
| Actin          | C14    |    | 22.26 | 86.77      | 1.99 MultipleMeltPeaks |
| adeA           | C14    |    |       |            | NoAmplification        |
| ampC-01        | C14    |    | 37.89 | 85.69      | 1.9                    |
| ampC-02        | C14    |    | 36.3  | 77.03      | 2.08                   |
| ampC-04        | C14    |    | 37.67 | 76.76      | 1.77                   |
| ampC-05        | C14    |    |       |            | NoAmplification        |
| ampC-06        | C14    |    |       |            | NoAmplification        |
| ampC-07        | C14    |    | 39.03 | 84.33      | 1.7 MultipleMeltPeaks  |
| ampC-09        | C14    |    |       |            | NoAmplification        |
| ampC/blaDH     | C14    |    | 32.43 | 77.17      | 1.96 MultipleMeltPeaks |

|                          |     |       |       |      |                   |
|--------------------------|-----|-------|-------|------|-------------------|
| aph                      | C14 |       |       |      | NoAmplification   |
| aph(2')-Id-01            | C14 |       |       |      | NoAmplification   |
| aph(2')-Id-02            | C14 |       |       |      | NoAmplification   |
| aph6ia                   | C14 | 26.04 | 78.47 | 1.96 |                   |
| aphA1(aka k <sub>z</sub> | C14 |       |       |      | NoAmplification   |
| bacA-01                  | C14 | 34.45 | 79.28 | 1.98 |                   |
| bacA-02                  | C14 | 37.47 | 83.59 | 1.62 |                   |
| BETA-globin              | C14 | 23.52 | 84.11 | 2.01 |                   |
| bla-ACC-1                | C14 |       |       |      | NoAmplification   |
| bla-L1                   | C14 | 33.9  | 84.37 | 1.95 | MultipleMeltPeaks |
| bla1                     | C14 |       |       |      | NoAmplification   |
| blaCMY                   | C14 | 33.13 | 79.59 | 1.94 |                   |
| blaCMY2-01               | C14 |       |       |      | NoAmplification   |
| blaCMY2-02               | C14 | 29.8  | 82.72 | 1.86 | MultipleMeltPeaks |
| blaCTX-M-01              | C14 |       |       |      | NoAmplification   |
| blaCTX-M-02              | C14 |       |       |      | NoAmplification   |
| blaCTX-M-03              | C14 |       |       |      | NoAmplification   |
| blaCTX-M-04              | C14 | 34.19 | 78.97 | 1.96 |                   |
| blaCTX-M-05              | C14 | 35.28 | 76.97 | 1.96 |                   |
| blaCTX-M-06              | C14 |       |       |      | NoAmplification   |
| blaGES                   | C14 |       |       |      | NoAmplification   |
| blaIMP-01                | C14 |       |       |      | NoAmplification   |
| blaIMP-02                | C14 |       |       |      | NoAmplification   |
| blaMOX/blaC              | C14 |       |       |      | NoAmplification   |
| blaOCH                   | C14 |       |       |      | NoAmplification   |
| blaOKP                   | C14 |       |       |      | NoAmplification   |
| blaOXA1/blaC             | C14 |       |       |      | NoAmplification   |
| blaOXA10-01              | C14 |       |       |      | NoAmplification   |
| blaOXA10-02              | C14 |       |       |      | NoAmplification   |
| blaOXY                   | C14 |       |       |      | NoAmplification   |
| blaPAO                   | C14 |       |       |      | NoAmplification   |
| blaPER                   | C14 |       |       |      | NoAmplification   |
| blaPSE                   | C14 |       |       |      | NoAmplification   |
| blaROB                   | C14 |       |       |      | NoAmplification   |
| blaSFO                   | C14 | 38.16 | 79.65 | 1.83 | MultipleMeltPeaks |
| blaSHV-01                | C14 |       |       |      | NoAmplification   |
| blaSHV-02                | C14 |       |       |      | NoAmplification   |
| blaTEM                   | C14 |       |       |      | NoAmplification   |
| blaTLA                   | C14 |       |       |      | NoAmplification   |
| blaVEB                   | C14 |       |       |      | NoAmplification   |
| blaVIM                   | C14 |       |       |      | NoAmplification   |
| blaZ                     | C14 |       |       |      | NoAmplification   |
| carB                     | C14 |       |       |      | CurveFitFailed    |
| catA1                    | C14 |       |       |      | NoAmplification   |
| catB3                    | C14 | 39.35 | 61.92 | 1.75 | MultipleMeltPeaks |
| catB8                    | C14 | 29.49 | 80.78 | 2    |                   |

|            |     |       |       |      |                             |
|------------|-----|-------|-------|------|-----------------------------|
| ceoA       | C14 | 28.02 | 82.03 | 1.96 | MultipleMeltPeaks           |
| cepA       | C14 |       |       |      | NoAmplification             |
| cfiA       | C14 |       |       |      | NoAmplification             |
| cfr        | C14 |       |       |      | NoAmplification             |
| cfxA       | C14 | 21.39 | 77.62 | 1.9  |                             |
| cmeA       | C14 |       |       |      | NoAmplification             |
| cmlA1-01   | C14 |       |       |      | NoAmplification             |
| cmlA1-02   | C14 |       |       |      | NoAmplification             |
| cmr        | C14 |       |       |      | NoAmplification             |
| cmx(A)     | C14 | 26.06 | 84.47 | 1.95 | MultipleMeltPeaks           |
| cphA-01    | C14 |       |       |      | NoAmplification             |
| cphA-02    | C14 |       |       |      | NoAmplification             |
| dfrA1      | C14 |       |       |      | NoAmplification             |
| dfrA12     | C14 |       |       |      | NoAmplification             |
| emrD       | C14 | 33.23 | 90.67 | 1.82 |                             |
| ereA       | C14 |       |       |      | NoAmplification             |
| ereB       | C14 |       |       |      | NoAmplification             |
| erm(34)    | C14 |       |       |      | NoAmplification             |
| erm(35)    | C14 |       |       |      | NoAmplification             |
| erm(36)    | C14 |       |       |      | NoAmplification             |
| ermA       | C14 |       |       |      | NoAmplification             |
| ermA/ermTR | C14 |       |       |      | NoAmplification             |
| ermB       | C14 |       |       |      | NoAmplification             |
| ermC       | C14 |       |       |      | NoAmplification             |
| ermF       | C14 | 26.96 | 74.63 | 2    |                             |
| ermJ/ermD  | C14 |       |       |      | NoAmplification             |
| ermK-01    | C14 | 37.41 | 86.28 | 1.89 | MultipleMeltPeaks           |
| ermK-02    | C14 |       |       |      | NoAmplification             |
| ermT-01    | C14 |       |       |      | NoAmplification             |
| ermT-02    | C14 | 37.87 | 61.86 | 1.93 | MultipleMeltPeaks           |
| ermX       | C14 | 26.1  | 84.25 | 1.88 |                             |
| ermY       | C14 |       |       |      | NoAmplification             |
| fabK       | C14 |       |       |      | NoAmplification             |
| floR       | C14 |       |       |      | NoAmplification             |
| folA       | C14 |       |       |      | NoAmplification             |
| fosB       | C14 |       |       |      | LowEfficiency, CtlSmall, S: |
| fosX       | C14 |       |       |      | NoAmplification             |
| fox5       | C14 | 33.69 | 86.64 | 1.93 |                             |
| imiR       | C14 |       |       |      | NoAmplification             |
| lmrA-01    | C14 |       |       |      | NoAmplification             |
| intl       | C14 | 33.08 | 84.72 | 1.91 |                             |
| intl1      | C14 | 23.33 | 87.01 | 1.94 | MultipleMeltPeaks           |
| IS613      | C14 | 27.18 | 79.48 | 2.01 |                             |
| lnuA-01    | C14 |       |       |      | NoAmplification             |
| lnuB-01    | C14 |       |       |      | NoAmplification             |
| lnuB-02    | C14 |       |       |      | NoAmplification             |

|               |     |       |       |      |                   |
|---------------|-----|-------|-------|------|-------------------|
| lnuC          | C14 |       |       |      | CurveFitFailed    |
| marR-01       | C14 | 35.56 | 85.24 | 1.89 |                   |
| matA/mel      | C14 | 22.99 | 77.6  | 2.05 |                   |
| mdet1         | C14 |       |       |      | NoAmplification   |
| mdtA          | C14 | 37.7  | 63.75 | 1.97 | MultipleMeltPeaks |
| mdtE/yhiU     | C14 | 36.42 | 86.23 | 1.75 | MultipleMeltPeaks |
| mecA          | C14 |       |       |      | NoAmplification   |
| mefA          | C14 | 22.27 | 80.53 | 1.97 |                   |
| mepA          | C14 | 39.25 | 62.27 | 1.74 | MultipleMeltPeaks |
| mexA          | C14 | 41.45 | 61.8  | 1.7  | MultipleMeltPeaks |
| mexD          | C14 |       |       |      | NoAmplification   |
| mexE          | C14 | 37.54 | 87.51 | 1.91 | MultipleMeltPeaks |
| mexF          | C14 | 31.57 | 87.32 | 1.61 |                   |
| mphA-01       | C14 | 30    | 89.43 | 1.95 |                   |
| mphA-02       | C14 | 33.65 | 85.32 | 1.68 |                   |
| mphB          | C14 | 38.59 | 78.39 | 1.8  |                   |
| mphC          | C14 |       |       |      | NoAmplification   |
| msrA-01       | C14 |       |       |      | NoAmplification   |
| msrC-01       | C14 |       |       |      | NoAmplification   |
| mtrC-01       | C14 |       |       |      | NoAmplification   |
| mtrC-02       | C14 |       |       |      | NoAmplification   |
| mtrD-02       | C14 | 29.79 | 82.63 | 1.98 |                   |
| mtrD-03       | C14 |       |       |      | NoAmplification   |
| NDM1          | C14 |       |       |      | NoAmplification   |
| nimE          | C14 | 37.86 | 74.57 | 2.01 |                   |
| nisB          | C14 |       |       |      | NoAmplification   |
| oleC          | C14 | 36.37 | 90.14 | 1.91 | MultipleMeltPeaks |
| oprD          | C14 | 32    | 84.02 | 1.96 | MultipleMeltPeaks |
| oprJ          | C14 | 35.18 | 90.88 | 1.95 |                   |
| pbp           | C14 | 39.29 | 81.52 | 1.65 | MultipleMeltPeaks |
| pbp2x         | C14 |       |       |      | NoAmplification   |
| Pbp5          | C14 |       |       |      | NoAmplification   |
| penA          | C14 |       |       |      | NoAmplification   |
| pikR1         | C14 | 35.59 | 89.67 | 1.88 |                   |
| pikR2         | C14 | 33.31 | 84.64 | 2.02 |                   |
| pmrA          | C14 | 26.41 | 79.6  | 2.03 |                   |
| pncA          | C14 | 34.95 | 90.07 | 1.85 | MultipleMeltPeaks |
| putative mulI | C14 |       |       |      | NoAmplification   |
| qac           | C14 |       |       |      | NoAmplification   |
| qacA          | C14 | 41.28 | 61.75 | 1.65 | MultipleMeltPeaks |
| qacA/qacB     | C14 |       |       |      | NoAmplification   |
| qacEdelta1-0  | C14 |       |       |      | NoAmplification   |
| qacEdelta1-0  | C14 | 34.71 | 74.91 | 1.76 | MultipleMeltPeaks |
| qacH-01       | C14 | 36.76 | 87.15 | 1.9  |                   |
| qacH-02       | C14 | 36.87 | 83.94 | 1.69 |                   |
| qnrA          | C14 |       |       |      | NoAmplification   |

|              |     |       |       |      |                   |
|--------------|-----|-------|-------|------|-------------------|
| rarD-02      | C14 |       |       |      | NoAmplification   |
| sat4         | C14 |       |       |      | NoAmplification   |
| sdeB         | C14 |       |       |      | NoAmplification   |
| spcN-01      | C14 |       |       |      | NoAmplification   |
| speA         | C14 |       |       |      | NoAmplification   |
| str          | C14 |       |       |      | NoAmplification   |
| strA         | C14 |       |       |      | NoAmplification   |
| strB         | C14 |       |       |      | NoAmplification   |
| sul1         | C14 |       |       |      | NoAmplification   |
| sul2         | C14 | 36.98 | 61.89 | 2.13 | MultipleMeltPeaks |
| sulA/foIP-01 | C14 | 25.23 | 82.14 | 2    |                   |
| sulA/foIP-03 | C14 | 25.89 | 83.48 | 1.98 |                   |
| tet(32)      | C14 | 25.8  | 81.18 | 2.01 |                   |
| tet(34)      | C14 | 30.07 | 75.8  | 2.02 |                   |
| tet(35)      | C14 |       |       |      | NoAmplification   |
| tet(36)-A    | C14 |       |       |      | NoAmplification   |
| tet(36)-B    | C14 |       |       |      | NoAmplification   |
| tet(37)      | C14 | 24.03 | 76.51 | 2    |                   |
| tetA-01      | C14 | 30.51 | 85.09 | 1.95 |                   |
| tetA-02      | C14 | 38.52 | 87.13 | 1.71 | MultipleMeltPeaks |
| tetB-01      | C14 | 28.79 | 79.55 | 1.96 |                   |
| tetB-02      | C14 | 28.4  | 79.62 | 2.01 |                   |
| tetC-01      | C14 | 27.97 | 75.25 | 1.99 |                   |
| tetC-02      | C14 | 27.33 | 76.2  | 2.05 |                   |
| tetD-01      | C14 |       |       |      | NoAmplification   |
| tetD-02      | C14 | 33.05 | 77.68 | 2.01 |                   |
| tetE         | C14 |       |       |      | NoAmplification   |
| tetG-01      | C14 | 38.68 | 82.33 | 1.78 |                   |
| tetG-02      | C14 |       |       |      | NoAmplification   |
| tetH         | C14 | 38.66 | 83.2  | 1.84 | MultipleMeltPeaks |
| tetJ         | C14 |       |       |      | NoAmplification   |
| tetK         | C14 |       |       |      | NoAmplification   |
| tetL-01      | C14 |       |       |      | NoAmplification   |
| tetL-02      | C14 | 32.71 | 85.31 | 1.83 |                   |
| tetM-01      | C14 | 21.8  | 76.25 | 2    |                   |
| tetM-02      | C14 | 21.47 | 77.75 | 2.05 |                   |
| tetO-01      | C14 | 26.51 | 76.72 | 2.04 |                   |
| tetPA        | C14 |       |       |      | NoAmplification   |
| tetPB-01     | C14 |       |       |      | NoAmplification   |
| tetPB-02     | C14 | 30    | 85.18 | 1.97 |                   |
| tetPB-03     | C14 |       |       |      | NoAmplification   |
| tetPB-05     | C14 |       |       |      | NoAmplification   |
| tetQ         | C14 | 23.19 | 76.22 | 2.05 |                   |
| tetR-02      | C14 | 32.44 | 88.57 | 1.86 | MultipleMeltPeaks |
| tetR-03      | C14 | 28.68 | 76.01 | 2.01 |                   |
| tetS         | C14 | 39.01 | 61.59 | 1.8  | MultipleMeltPeaks |



|             |     |       |       |      |                   |
|-------------|-----|-------|-------|------|-------------------|
| tetT        | C14 | 37.91 | 71.95 | 1.88 |                   |
| tetU-01     | C14 |       |       |      | NoAmplification   |
| tetV        | C14 |       |       |      | NoAmplification   |
| tetW-01     | C14 | 22.04 | 81.73 | 2.01 |                   |
| tetX        | C14 | 37.66 | 81.92 | 1.79 |                   |
| tnpA-01     | C14 |       |       |      | NoAmplification   |
| tnpA-02     | C14 | 36.12 | 86.65 | 1.71 |                   |
| tnpA-03     | C14 | 35.65 | 74.11 | 2.09 |                   |
| tnpA-04     | C14 |       |       |      | NoAmplification   |
| tnpA-05     | C14 |       |       |      | NoAmplification   |
| tnpA-07     | C14 |       |       |      | NoAmplification   |
| tolC-01     | C14 |       |       |      | NoAmplification   |
| tolC-02     | C14 | 31.96 | 84.26 | 1.95 | MultipleMeltPeaks |
| tolC-03     | C14 | 32.25 | 85.07 | 1.96 |                   |
| Tp614       | C14 |       |       |      | CurveFitFailed    |
| ttgA        | C14 |       |       |      | NoAmplification   |
| ttgB        | C14 | 39.08 | 79.26 | 1.8  |                   |
| vanA        | C14 |       |       |      | NoAmplification   |
| vanB-01     | C14 | 31.63 | 85.86 | 1.91 | MultipleMeltPeaks |
| vanC-01     | C14 |       |       |      | NoAmplification   |
| vanC-02     | C14 |       |       |      | NoAmplification   |
| vanC-03     | C14 | 30.42 | 84.71 | 1.86 | MultipleMeltPeaks |
| vanC1       | C14 |       |       |      | NoAmplification   |
| vanC2/vanC3 | C14 | 34.71 | 78.12 | 2.08 |                   |
| vanG        | C14 |       |       |      | NoAmplification   |
| vanHB       | C14 |       |       |      | NoAmplification   |
| vanHD       | C14 |       |       |      | NoAmplification   |
| vanRA-01    | C14 |       |       |      | NoAmplification   |
| vanRA-02    | C14 |       |       |      | NoAmplification   |
| vanRB       | C14 | 34.52 | 87.4  | 1.92 |                   |
| vanRC       | C14 |       |       |      | NoAmplification   |
| vanRC4      | C14 |       |       |      | NoAmplification   |
| vanRD       | C14 |       |       |      | NoAmplification   |
| vanSA       | C14 |       |       |      | NoAmplification   |
| vanSB       | C14 | 29.94 | 74.35 | 2.01 |                   |
| vanSC-01    | C14 | 33.45 | 83.93 | 1.99 |                   |
| vanSC-02    | C14 |       |       |      | NoAmplification   |
| vanTC-01    | C14 |       |       |      | NoAmplification   |
| vanTC-02    | C14 |       |       |      | NoAmplification   |
| vanTE       | C14 |       |       |      | NoAmplification   |
| vanTG       | C14 |       |       |      | NoAmplification   |
| vanWB       | C14 |       |       |      | NoAmplification   |
| vanWG       | C14 | 39.44 | 74.56 | 1.89 |                   |
| vanXA       | C14 |       |       |      | NoAmplification   |
| vanXB       | C14 |       |       |      | NoAmplification   |
| vanXD       | C14 | 31.92 | 75.77 | 2.03 |                   |

|              |     |       |       |      |                   |
|--------------|-----|-------|-------|------|-------------------|
| vanYB        | C14 | 35.65 | 85.47 | 1.93 |                   |
| vanYD-01     | C14 |       |       |      | CurveFitFailed    |
| vanYD-02     | C14 |       |       |      | NoAmplification   |
| vatB-01      | C14 |       |       |      | NoAmplification   |
| vatB-02      | C14 |       |       |      | CurveFitFailed    |
| vatC-01      | C14 |       |       |      | NoAmplification   |
| vatC-02      | C14 | 37.62 | 83.28 | 1.81 |                   |
| vatE-01      | C14 | 30.52 | 75.99 | 2.06 |                   |
| vatE-02      | C14 |       |       |      | NoAmplification   |
| vgaA-01      | C14 |       |       |      | NoAmplification   |
| vgaA-02      | C14 |       |       |      | NoAmplification   |
| vgb-01       | C14 | 36.31 | 87.25 | 1.87 |                   |
| vgbB-01      | C14 |       |       |      | NoAmplification   |
| vgbB-02      | C14 |       |       |      | NoAmplification   |
| yceE/mdtG-0  | C14 |       |       |      | NoAmplification   |
| yceE/mdtG-0  | C14 | 35.02 | 81.02 | 1.94 |                   |
| yceL/mdtH-0  | C14 | 28.76 | 76.68 | 2.01 |                   |
| yceL/mdtH-0  | C14 |       |       |      | NoAmplification   |
| yceL/mdtH-0  | C14 |       |       |      | NoAmplification   |
| yidY/mdtL-01 | C14 | 31.16 | 82.42 | 1.94 | MultipleMeltPeaks |
| yidY/mdtL-02 | C14 |       |       |      | NoAmplification   |

| Assay          | Sample | Ct | Tm    | Efficiency | Flags                  |
|----------------|--------|----|-------|------------|------------------------|
| 16S rRNA       | C15    |    | 19.75 | 81.97      | 1.97                   |
| aac            | C15    |    | 38.13 | 62.69      | 1.66 MultipleMeltPeaks |
| aac(6')-Ib(akz | C15    |    |       |            | NoAmplification        |
| aac(6')-Ib(akz | C15    |    |       |            | CurveFitFailed         |
| aac(6')-Ib(akz | C15    |    |       |            | NoAmplification        |
| aac(6')-II     | C15    |    |       |            | NoAmplification        |
| aac(6')I1      | C15    |    |       |            | NoAmplification        |
| aacA/aphD      | C15    |    |       |            | NoAmplification        |
| aacC           | C15    |    | 32.86 | 85.54      | 1.84                   |
| aacC1          | C15    |    |       |            | NoAmplification        |
| aacC2          | C15    |    |       |            | NoAmplification        |
| aacC4          | C15    |    |       |            | NoAmplification        |
| aadA-01        | C15    |    |       |            | NoAmplification        |
| aadA-02        | C15    |    |       |            | NoAmplification        |
| aadA-1-01      | C15    |    |       |            | NoAmplification        |
| aadA-1-02      | C15    |    |       |            | NoAmplification        |
| aadA1          | C15    |    |       |            | NoAmplification        |
| aadA2-01       | C15    |    |       |            | NoAmplification        |
| aadA2-02       | C15    |    |       |            | NoAmplification        |
| aadA2-03       | C15    |    |       |            | NoAmplification        |
| aadA5-01       | C15    |    |       |            | NoAmplification        |
| aadA5-02       | C15    |    |       |            | NoAmplification        |
| aadA9-01       | C15    |    |       |            | NoAmplification        |
| aadA9-02       | C15    |    |       |            | NoAmplification        |
| aadD           | C15    |    |       |            | NoAmplification        |
| aadE           | C15    |    |       |            | NoAmplification        |
| acrA-01        | C15    |    | 37.6  | 78.07      | 1.96                   |
| acrA-02        | C15    |    |       |            | NoAmplification        |
| acrA-03        | C15    |    |       |            | NoAmplification        |
| acrA-04        | C15    |    | 35.74 | 86.05      | 1.96                   |
| acrA-05        | C15    |    | 32.68 | 86.48      | 1.9                    |
| acrB-01        | C15    |    |       |            | NoAmplification        |
| acrF           | C15    |    | 34.01 | 82.99      | 1.76                   |
| acrR-01        | C15    |    |       |            | NoAmplification        |
| acrR-02        | C15    |    |       |            | NoAmplification        |
| Actin          | C15    |    | 25.52 | 87.09      | 1.95                   |
| adeA           | C15    |    |       |            | NoAmplification        |
| ampC-01        | C15    |    |       |            | NoAmplification        |
| ampC-02        | C15    |    |       |            | NoAmplification        |
| ampC-04        | C15    |    |       |            | NoAmplification        |
| ampC-05        | C15    |    | 31.87 | 83.07      | 1.95                   |
| ampC-06        | C15    |    |       |            | NoAmplification        |
| ampC-07        | C15    |    |       |            | NoAmplification        |
| ampC-09        | C15    |    |       |            | NoAmplification        |
| ampC/blaDH     | C15    |    | 40.77 | 75.48      | 1.67 MultipleMeltPeaks |

|                          |     |       |       |      |                   |
|--------------------------|-----|-------|-------|------|-------------------|
| aph                      | C15 |       |       |      | NoAmplification   |
| aph(2')-Id-01            | C15 |       |       |      | NoAmplification   |
| aph(2')-Id-02            | C15 |       |       |      | NoAmplification   |
| aph6ia                   | C15 | 31.78 | 77.98 | 1.96 | MultipleMeltPeaks |
| aphA1(aka k <sub>z</sub> | C15 |       |       |      | NoAmplification   |
| bacA-01                  | C15 |       |       |      | NoAmplification   |
| bacA-02                  | C15 | 38.61 | 84.36 | 1.55 |                   |
| BETA-globin              | C15 | 26.43 | 84.05 | 1.95 |                   |
| bla-ACC-1                | C15 |       |       |      | NoAmplification   |
| bla-L1                   | C15 | 35.73 | 81.19 | 1.95 | MultipleMeltPeaks |
| bla1                     | C15 |       |       |      | NoAmplification   |
| blaCMY                   | C15 |       |       |      | NoAmplification   |
| blaCMY2-01               | C15 |       |       |      | NoAmplification   |
| blaCMY2-02               | C15 | 37.74 | 76.07 | 1.81 | MultipleMeltPeaks |
| blaCTX-M-01              | C15 | 31.97 | 87.51 | 1.69 |                   |
| blaCTX-M-02              | C15 |       |       |      | NoAmplification   |
| blaCTX-M-03              | C15 |       |       |      | NoAmplification   |
| blaCTX-M-04              | C15 | 36.56 | 90.28 | 1.88 |                   |
| blaCTX-M-05              | C15 |       |       |      | NoAmplification   |
| blaCTX-M-06              | C15 |       |       |      | NoAmplification   |
| blaGES                   | C15 |       |       |      | NoAmplification   |
| blaIMP-01                | C15 |       |       |      | NoAmplification   |
| blaIMP-02                | C15 |       |       |      | NoAmplification   |
| blaMOX/blaC              | C15 |       |       |      | NoAmplification   |
| blaOCH                   | C15 |       |       |      | NoAmplification   |
| blaOKP                   | C15 |       |       |      | NoAmplification   |
| blaOXA1/blaC             | C15 |       |       |      | NoAmplification   |
| blaOXA10-01              | C15 |       |       |      | NoAmplification   |
| blaOXA10-02              | C15 |       |       |      | NoAmplification   |
| blaOXY                   | C15 |       |       |      | NoAmplification   |
| blaPAO                   | C15 |       |       |      | NoAmplification   |
| blaPER                   | C15 |       |       |      | NoAmplification   |
| blaPSE                   | C15 |       |       |      | NoAmplification   |
| blaROB                   | C15 |       |       |      | NoAmplification   |
| blaSFO                   | C15 | 34.9  | 86.85 | 1.91 |                   |
| blaSHV-01                | C15 |       |       |      | NoAmplification   |
| blaSHV-02                | C15 |       |       |      | NoAmplification   |
| blaTEM                   | C15 |       |       |      | NoAmplification   |
| blaTLA                   | C15 |       |       |      | NoAmplification   |
| blaVEB                   | C15 |       |       |      | NoAmplification   |
| blaVIM                   | C15 |       |       |      | NoAmplification   |
| blaZ                     | C15 |       |       |      | NoAmplification   |
| carB                     | C15 |       |       |      | NoAmplification   |
| catA1                    | C15 |       |       |      | NoAmplification   |
| catB3                    | C15 |       |       |      | NoAmplification   |
| catB8                    | C15 | 36.3  | 80.84 | 1.81 |                   |

|            |     |       |       |      |                             |
|------------|-----|-------|-------|------|-----------------------------|
| ceoA       | C15 | 30.63 | 82.27 | 1.94 |                             |
| cepA       | C15 |       |       |      | NoAmplification             |
| cfiA       | C15 |       |       |      | NoAmplification             |
| cfr        | C15 | 39.54 | 79.18 | 1.82 |                             |
| cfxA       | C15 | 24.42 | 77.43 | 1.88 |                             |
| cmeA       | C15 |       |       |      | NoAmplification             |
| cmlA1-01   | C15 |       |       |      | NoAmplification             |
| cmlA1-02   | C15 |       |       |      | NoAmplification             |
| cmr        | C15 |       |       |      | NoAmplification             |
| cmx(A)     | C15 | 33.99 | 81.87 | 1.96 |                             |
| cphA-01    | C15 |       |       |      | NoAmplification             |
| cphA-02    | C15 |       |       |      | NoAmplification             |
| dfrA1      | C15 |       |       |      | NoAmplification             |
| dfrA12     | C15 |       |       |      | NoAmplification             |
| emrD       | C15 | 34.04 | 90.41 | 1.83 |                             |
| ereA       | C15 |       |       |      | NoAmplification             |
| ereB       | C15 |       |       |      | NoAmplification             |
| erm(34)    | C15 |       |       |      | NoAmplification             |
| erm(35)    | C15 |       |       |      | NoAmplification             |
| erm(36)    | C15 |       |       |      | NoAmplification             |
| ermA       | C15 |       |       |      | NoAmplification             |
| ermA/ermTR | C15 |       |       |      | NoAmplification             |
| ermB       | C15 | 26.68 | 75    | 2.07 |                             |
| ermC       | C15 |       |       |      | NoAmplification             |
| ermF       | C15 | 28.25 | 74.38 | 2    |                             |
| ermJ/ermD  | C15 |       |       |      | NoAmplification             |
| ermK-01    | C15 | 34.9  | 74    | 2    |                             |
| ermK-02    | C15 |       |       |      | NoAmplification             |
| ermT-01    | C15 |       |       |      | NoAmplification             |
| ermT-02    | C15 |       |       |      | NoAmplification             |
| ermX       | C15 |       |       |      | NoAmplification             |
| ermY       | C15 |       |       |      | NoAmplification             |
| fabK       | C15 | 30.7  | 79.05 | 2.08 |                             |
| floR       | C15 |       |       |      | NoAmplification             |
| folA       | C15 |       |       |      | NoAmplification             |
| fosB       | C15 |       |       |      | LowEfficiency, CtlSmall, S: |
| fosX       | C15 |       |       |      | NoAmplification             |
| fox5       | C15 |       |       |      | NoAmplification             |
| imiR       | C15 |       |       |      | NoAmplification             |
| lmrA-01    | C15 |       |       |      | NoAmplification             |
| intl       | C15 | 36.87 | 84.68 | 1.84 |                             |
| intl1      | C15 | 25.28 | 83.5  | 1.96 |                             |
| IS613      | C15 | 27.27 | 79.85 | 2.05 |                             |
| lnuA-01    | C15 |       |       |      | NoAmplification             |
| lnuB-01    | C15 |       |       |      | NoAmplification             |
| lnuB-02    | C15 |       |       |      | NoAmplification             |

|               |     |       |       |      |                   |
|---------------|-----|-------|-------|------|-------------------|
| lnuC          | C15 |       |       |      | NoAmplification   |
| marR-01       | C15 |       |       |      | NoAmplification   |
| matA/mel      | C15 | 23.52 | 77.47 | 2.06 |                   |
| mdet1         | C15 |       |       |      | NoAmplification   |
| mdtA          | C15 |       |       |      | NoAmplification   |
| mdtE/yhiU     | C15 |       |       |      | NoAmplification   |
| mecA          | C15 |       |       |      | NoAmplification   |
| mefA          | C15 | 22.66 | 80.49 | 1.96 |                   |
| mepA          | C15 | 34.98 | 88.88 | 1.9  |                   |
| mexA          | C15 |       |       |      | NoAmplification   |
| mexD          | C15 |       |       |      | NoAmplification   |
| mexE          | C15 |       |       |      | NoAmplification   |
| mexF          | C15 |       |       |      | CurveFitFailed    |
| mphA-01       | C15 | 35.59 | 88.14 | 1.84 | MultipleMeltPeaks |
| mphA-02       | C15 | 31.15 | 77.42 | 1.88 |                   |
| mphB          | C15 | 32.83 | 76.18 | 2.06 |                   |
| mphC          | C15 |       |       |      | NoAmplification   |
| msrA-01       | C15 |       |       |      | NoAmplification   |
| msrC-01       | C15 |       |       |      | NoAmplification   |
| mtrC-01       | C15 |       |       |      | NoAmplification   |
| mtrC-02       | C15 |       |       |      | NoAmplification   |
| mtrD-02       | C15 | 32.83 | 81.22 | 1.99 |                   |
| mtrD-03       | C15 | 31.41 | 79.69 | 1.8  |                   |
| NDM1          | C15 |       |       |      | NoAmplification   |
| nimE          | C15 |       |       |      | NoAmplification   |
| nisB          | C15 | 38.91 | 73.72 | 1.85 |                   |
| oleC          | C15 |       |       |      | NoAmplification   |
| oprD          | C15 | 32.89 | 81.74 | 1.97 |                   |
| oprJ          | C15 |       |       |      | NoAmplification   |
| pbp           | C15 |       |       |      | NoAmplification   |
| pbp2x         | C15 |       |       |      | NoAmplification   |
| Pbp5          | C15 |       |       |      | NoAmplification   |
| penA          | C15 |       |       |      | NoAmplification   |
| pikR1         | C15 |       |       |      | NoAmplification   |
| pikR2         | C15 | 38.93 | 85.1  | 1.61 |                   |
| pmrA          | C15 | 26.66 | 78.99 | 2.06 |                   |
| pncA          | C15 | 29.92 | 88.33 | 1.85 |                   |
| putative mult | C15 | 36.62 | 77.04 | 1.91 | MultipleMeltPeaks |
| qac           | C15 |       |       |      | NoAmplification   |
| qacA          | C15 |       |       |      | NoAmplification   |
| qacA/qacB     | C15 |       |       |      | NoAmplification   |
| qacEdelta1-0  | C15 |       |       |      | NoAmplification   |
| qacEdelta1-0  | C15 | 28.99 | 78.91 | 1.98 |                   |
| qacH-01       | C15 |       |       |      | NoAmplification   |
| qacH-02       | C15 |       |       |      | NoAmplification   |
| qnrA          | C15 |       |       |      | NoAmplification   |

|              |     |       |       |                 |
|--------------|-----|-------|-------|-----------------|
| rarD-02      | C15 |       |       | NoAmplification |
| sat4         | C15 |       |       | NoAmplification |
| sdeB         | C15 |       |       | NoAmplification |
| spcN-01      | C15 |       |       | NoAmplification |
| speA         | C15 |       |       | NoAmplification |
| str          | C15 |       |       | NoAmplification |
| strA         | C15 |       |       | NoAmplification |
| strB         | C15 |       |       | NoAmplification |
| sul1         | C15 |       |       | NoAmplification |
| sul2         | C15 |       |       | NoAmplification |
| sulA/foIP-01 | C15 | 25.1  | 81.6  | 1.99            |
| sulA/foIP-03 | C15 | 25.07 | 83.51 | 1.99            |
| tet(32)      | C15 |       |       | NoAmplification |
| tet(34)      | C15 | 28.59 | 75.88 | 2.02            |
| tet(35)      | C15 |       |       | NoAmplification |
| tet(36)-A    | C15 |       |       | NoAmplification |
| tet(36)-B    | C15 |       |       | NoAmplification |
| tet(37)      | C15 | 28.55 | 76.36 | 1.99            |
| tetA-01      | C15 |       |       | NoAmplification |
| tetA-02      | C15 |       |       | NoAmplification |
| tetB-01      | C15 |       |       | NoAmplification |
| tetB-02      | C15 | 38.13 | 79.47 | 1.8             |
| tetC-01      | C15 |       |       | NoAmplification |
| tetC-02      | C15 |       |       | NoAmplification |
| tetD-01      | C15 |       |       | NoAmplification |
| tetD-02      | C15 |       |       | NoAmplification |
| tetE         | C15 |       |       | NoAmplification |
| tetG-01      | C15 |       |       | NoAmplification |
| tetG-02      | C15 |       |       | NoAmplification |
| tetH         | C15 |       |       | NoAmplification |
| tetJ         | C15 |       |       | NoAmplification |
| tetK         | C15 |       |       | NoAmplification |
| tetL-01      | C15 |       |       | NoAmplification |
| tetL-02      | C15 |       |       | NoAmplification |
| tetM-01      | C15 | 24.69 | 76.01 | 2.01            |
| tetM-02      | C15 | 25.72 | 77.54 | 2.02            |
| tetO-01      | C15 |       |       | NoAmplification |
| tetPA        | C15 |       |       | NoAmplification |
| tetPB-01     | C15 |       |       | NoAmplification |
| tetPB-02     | C15 | 38.93 | 85.17 | 1.87            |
| tetPB-03     | C15 |       |       | NoAmplification |
| tetPB-05     | C15 |       |       | NoAmplification |
| tetQ         | C15 | 26.89 | 76.69 | 2.01            |
| tetR-02      | C15 | 33.53 | 79.95 | 1.97            |
| tetR-03      | C15 |       |       | NoAmplification |
| tetS         | C15 |       |       | CurveFitFailed  |

|             |     |       |       |      |                   |
|-------------|-----|-------|-------|------|-------------------|
| tetT        | C15 |       |       |      | NoAmplification   |
| tetU-01     | C15 |       |       |      | NoAmplification   |
| tetV        | C15 |       |       |      | NoAmplification   |
| tetW-01     | C15 | 25.63 | 81.72 | 2    |                   |
| tetX        | C15 |       |       |      | NoAmplification   |
| tnpA-01     | C15 |       |       |      | NoAmplification   |
| tnpA-02     | C15 |       |       |      | NoAmplification   |
| tnpA-03     | C15 | 26.9  | 77.75 | 2.08 |                   |
| tnpA-04     | C15 |       |       |      | NoAmplification   |
| tnpA-05     | C15 |       |       |      | NoAmplification   |
| tnpA-07     | C15 |       |       |      | NoAmplification   |
| tolC-01     | C15 | 37.29 | 89.85 | 1.82 | MultipleMeltPeaks |
| tolC-02     | C15 | 32.26 | 85.25 | 1.94 |                   |
| tolC-03     | C15 |       |       |      | NoAmplification   |
| Tp614       | C15 |       |       |      | NoAmplification   |
| ttgA        | C15 |       |       |      | NoAmplification   |
| ttgB        | C15 | 37.33 | 79.1  | 1.89 |                   |
| vanA        | C15 |       |       |      | NoAmplification   |
| vanB-01     | C15 | 32.42 | 81.54 | 1.94 |                   |
| vanC-01     | C15 |       |       |      | NoAmplification   |
| vanC-02     | C15 |       |       |      | NoAmplification   |
| vanC-03     | C15 |       |       |      | CurveFitFailed    |
| vanC1       | C15 |       |       |      | NoAmplification   |
| vanC2/vanC3 | C15 |       |       |      | NoAmplification   |
| vanG        | C15 |       |       |      | NoAmplification   |
| vanHB       | C15 | 37.91 | 91.69 | 1.82 | MultipleMeltPeaks |
| vanHD       | C15 |       |       |      | NoAmplification   |
| vanRA-01    | C15 |       |       |      | NoAmplification   |
| vanRA-02    | C15 |       |       |      | NoAmplification   |
| vanRB       | C15 | 38.55 | 62.28 | 1.78 | MultipleMeltPeaks |
| vanRC       | C15 |       |       |      | NoAmplification   |
| vanRC4      | C15 |       |       |      | NoAmplification   |
| vanRD       | C15 |       |       |      | NoAmplification   |
| vanSA       | C15 |       |       |      | NoAmplification   |
| vanSB       | C15 | 28.99 | 74.19 | 2.02 |                   |
| vanSC-01    | C15 |       |       |      | NoAmplification   |
| vanSC-02    | C15 |       |       |      | NoAmplification   |
| vanTC-01    | C15 |       |       |      | NoAmplification   |
| vanTC-02    | C15 |       |       |      | NoAmplification   |
| vanTE       | C15 |       |       |      | NoAmplification   |
| vanTG       | C15 |       |       |      | NoAmplification   |
| vanWB       | C15 |       |       |      | NoAmplification   |
| vanWG       | C15 | 36.54 | 74.01 | 2.03 |                   |
| vanXA       | C15 | 39.24 | 73.41 | 1.73 |                   |
| vanXB       | C15 |       |       |      | NoAmplification   |
| vanXD       | C15 | 30.42 | 75.23 | 2.02 |                   |



|              |     |       |       |      |                   |
|--------------|-----|-------|-------|------|-------------------|
| vanYB        | C15 |       |       |      | NoAmplification   |
| vanYD-01     | C15 | 38.74 | 80.95 | 1.77 | MultipleMeltPeaks |
| vanYD-02     | C15 |       |       |      | NoAmplification   |
| vatB-01      | C15 |       |       |      | NoAmplification   |
| vatB-02      | C15 |       |       |      | NoAmplification   |
| vatC-01      | C15 |       |       |      | NoAmplification   |
| vatC-02      | C15 |       |       |      | NoAmplification   |
| vatE-01      | C15 | 30.58 | 75.86 | 2.04 |                   |
| vatE-02      | C15 |       |       |      | NoAmplification   |
| vgaA-01      | C15 |       |       |      | NoAmplification   |
| vgaA-02      | C15 |       |       |      | NoAmplification   |
| vgb-01       | C15 |       |       |      | NoAmplification   |
| vgbB-01      | C15 |       |       |      | NoAmplification   |
| vgbB-02      | C15 |       |       |      | NoAmplification   |
| yceE/mdtG-0  | C15 |       |       |      | NoAmplification   |
| yceE/mdtG-0  | C15 |       |       |      | NoAmplification   |
| yceL/mdtH-0  | C15 |       |       |      | NoAmplification   |
| yceL/mdtH-0  | C15 |       |       |      | NoAmplification   |
| yceL/mdtH-0  | C15 | 38    | 87.07 | 1.74 | MultipleMeltPeaks |
| yidY/mdtL-01 | C15 | 37.72 | 82.63 | 1.78 | MultipleMeltPeaks |
| yidY/mdtL-02 | C15 |       |       |      | NoAmplification   |

| Assay          | Sample | Ct | Tm    | Efficiency | Flags                        |
|----------------|--------|----|-------|------------|------------------------------|
| 16S rRNA       | C16    |    | 15.79 | 81.86      | 2.1                          |
| aac            | C16    |    | 30.13 | 81.88      | 1.95                         |
| aac(6')-Ib(akz | C16    |    | 35.59 | 83.43      | 1.87                         |
| aac(6')-Ib(akz | C16    |    | 30.1  | 79.32      | 1.95 MultipleMeltPeaks       |
| aac(6')-Ib(akz | C16    |    | 30.63 | 84.26      | 1.98                         |
| aac(6')-II     | C16    |    | 37.58 | 81.11      | 1.61 MultipleMeltPeaks       |
| aac(6')I1      | C16    |    | 34.97 | 88.12      | 1.85                         |
| aacA/aphD      | C16    |    |       |            | CurveFitFailed               |
| aacC           | C16    |    | 26.26 | 88.14      | 1.9                          |
| aacC1          | C16    |    |       |            | CurveFitFailed               |
| aacC2          | C16    |    | 38.31 | 82.84      | 1.79                         |
| aacC4          | C16    |    | 31.16 | 90.41      | 1.95                         |
| aadA-01        | C16    |    | 38.81 | 62.73      | 1.86 MultipleMeltPeaks       |
| aadA-02        | C16    |    | 32.41 | 80.4       | 1.96                         |
| aadA-1-01      | C16    |    | 33.38 | 81.73      | 1.97 MultipleMeltPeaks       |
| aadA-1-02      | C16    |    |       |            | CurveFitFailed               |
| aadA1          | C16    |    | 30.2  | 83.13      | 2.02                         |
| aadA2-01       | C16    |    | 33.15 | 90.73      | 1.8                          |
| aadA2-02       | C16    |    | 32.78 | 75.34      | 2.02                         |
| aadA2-03       | C16    |    |       |            | LowEfficiency, CtIsSmall, Se |
| aadA5-01       | C16    |    | 34.55 | 88.5       | 1.87 MultipleMeltPeaks       |
| aadA5-02       | C16    |    | 30.55 | 83.28      | 1.97 MultipleMeltPeaks       |
| aadA9-01       | C16    |    | 35.99 | 86.39      | 1.86 MultipleMeltPeaks       |
| aadA9-02       | C16    |    | 37.51 | 84.29      | 1.76                         |
| aadD           | C16    |    |       |            | NoAmplification              |
| aadE           | C16    |    | 44.21 | 74.69      | 1.78                         |
| acrA-01        | C16    |    | 30.01 | 88.62      | 1.92                         |
| acrA-02        | C16    |    | 33.02 | 82.69      | 1.91 MultipleMeltPeaks       |
| acrA-03        | C16    |    | 35.06 | 89.33      | 1.77                         |
| acrA-04        | C16    |    | 28.64 | 88.09      | 1.99 MultipleMeltPeaks       |
| acrA-05        | C16    |    | 30.46 | 88.59      | 1.99                         |
| acrB-01        | C16    |    |       |            | NoAmplification              |
| acrF           | C16    |    | 31.43 | 84.34      | 2 MultipleMeltPeaks          |
| acrR-01        | C16    |    | 31.92 | 80.91      | 1.93 MultipleMeltPeaks       |
| acrR-02        | C16    |    | 35.07 | 85.89      | 1.84                         |
| Actin          | C16    |    | 22.16 | 87.05      | 1.93                         |
| adeA           | C16    |    | 28.47 | 83.09      | 1.89                         |
| ampC-01        | C16    |    | 27.3  | 85.25      | 1.97 MultipleMeltPeaks       |
| ampC-02        | C16    |    | 33.59 | 83.08      | 1.99                         |
| ampC-04        | C16    |    | 28.74 | 86.01      | 1.96                         |
| ampC-05        | C16    |    | 37.53 | 91.78      | 1.74 MultipleMeltPeaks       |
| ampC-06        | C16    |    | 40.79 | 76.7       | 1.7 MultipleMeltPeaks        |
| ampC-07        | C16    |    | 33.73 | 83.96      | 1.91 MultipleMeltPeaks       |
| ampC-09        | C16    |    | 34.74 | 88.41      | 1.81                         |
| ampC/blaDH     | C16    |    | 29.07 | 84.44      | 1.98                         |

|                          |     |       |       |      |                              |
|--------------------------|-----|-------|-------|------|------------------------------|
| aph                      | C16 |       |       |      | LowEfficiency, CtIsSmall, S: |
| aph(2')-Id-01            | C16 |       |       |      | LowEfficiency, CtIsSmall, S: |
| aph(2')-Id-02            | C16 |       |       |      | CurveFitFailed               |
| aph6ia                   | C16 | 29.93 | 78.82 | 1.93 |                              |
| aphA1(aka k <sub>z</sub> | C16 |       |       |      | LowEfficiency, CtIsSmall, S: |
| bacA-01                  | C16 | 31.55 | 76.04 | 2.01 |                              |
| bacA-02                  | C16 | 38.54 | 83.87 | 1.71 | MultipleMeltPeaks            |
| BETA-globin              | C16 | 23.81 | 83.88 | 1.99 | MultipleMeltPeaks            |
| bla-ACC-1                | C16 | 33.76 | 85.99 | 1.88 | MultipleMeltPeaks            |
| bla-L1                   | C16 | 30.4  | 85.48 | 1.99 |                              |
| bla1                     | C16 |       |       |      | CurveFitFailed               |
| blaCMY                   | C16 | 32.38 | 79.8  | 1.94 |                              |
| blaCMY2-01               | C16 | 34.48 | 77.3  | 2.01 | MultipleMeltPeaks            |
| blaCMY2-02               | C16 | 27.86 | 88.94 | 1.95 |                              |
| blaCTX-M-01              | C16 | 33.55 | 87.92 | 2.11 |                              |
| blaCTX-M-02              | C16 | 30.06 | 84.82 | 1.86 | MultipleMeltPeaks            |
| blaCTX-M-03              | C16 |       |       |      | BadR2, LowEfficiency, CtIsS  |
| blaCTX-M-04              | C16 | 29.95 | 87.43 | 1.83 | MultipleMeltPeaks            |
| blaCTX-M-05              | C16 | 30.58 | 76.65 | 1.73 |                              |
| blaCTX-M-06              | C16 |       |       |      | NoAmplification              |
| blaGES                   | C16 |       |       |      | LowEfficiency, CtIsSmall, S: |
| blaIMP-01                | C16 |       |       |      | NoAmplification              |
| blaIMP-02                | C16 |       |       |      | LowEfficiency, CtIsSmall, S: |
| blaMOX/blaC              | C16 |       |       |      | CurveFitFailed               |
| blaOCH                   | C16 | 30.31 | 89.85 | 2.1  |                              |
| blaOKP                   | C16 | 35.77 | 84.96 | 1.73 | MultipleMeltPeaks            |
| blaOXA1/blaC             | C16 |       |       |      | CurveFitFailed               |
| blaOXA10-01              | C16 |       |       |      | CurveFitFailed               |
| blaOXA10-02              | C16 |       |       |      | LowEfficiency, CtIsSmall, S: |
| blaOXY                   | C16 | 26.69 | 88.03 | 1.76 |                              |
| blaPAO                   | C16 |       |       |      | NoAmplification              |
| blaPER                   | C16 | 36.65 | 77.66 | 1.77 | MultipleMeltPeaks            |
| blaPSE                   | C16 |       |       |      | CurveFitFailed               |
| blaROB                   | C16 | 31.52 | 87.5  | 1.86 |                              |
| blaSFO                   | C16 | 28    | 87.34 | 1.94 |                              |
| blaSHV-01                | C16 | 32.4  | 87.92 | 1.95 |                              |
| blaSHV-02                | C16 | 34.53 | 86.76 | 1.89 |                              |
| blaTEM                   | C16 | 24.82 | 79.36 | 2.03 |                              |
| blaTLA                   | C16 |       |       |      | CurveFitFailed               |
| blaVEB                   | C16 |       |       |      | NoAmplification              |
| blaVIM                   | C16 | 34.24 | 78.72 | 1.96 | MultipleMeltPeaks            |
| blaZ                     | C16 | 29.34 | 73.79 | 2.04 |                              |
| carB                     | C16 | 32.09 | 82.2  | 1.98 | MultipleMeltPeaks            |
| catA1                    | C16 |       |       |      | NoAmplification              |
| catB3                    | C16 | 38.58 | 80.03 | 1.79 |                              |
| catB8                    | C16 | 28.67 | 82.73 | 1.94 |                              |

|            |     |       |       |      |                              |
|------------|-----|-------|-------|------|------------------------------|
| ceoA       | C16 | 28.91 | 83.12 | 1.95 |                              |
| cepA       | C16 |       |       |      | NoAmplification              |
| cfiA       | C16 | 31.9  | 87.3  | 1.91 |                              |
| cfr        | C16 |       |       |      | LowEfficiency, CtIsSmall, S: |
| cfxA       | C16 | 21.86 | 77.67 | 2.12 |                              |
| cmeA       | C16 | 35.79 | 82.87 | 1.81 |                              |
| cmlA1-01   | C16 | 32.29 | 87.95 | 1.94 | MultipleMeltPeaks            |
| cmlA1-02   | C16 | 32.59 | 89.46 | 1.92 |                              |
| cmr        | C16 | 38.74 | 85.25 | 1.79 |                              |
| cmx(A)     | C16 | 27.95 | 84.46 | 2    |                              |
| cphA-01    | C16 | 28.35 | 85.48 | 1.96 |                              |
| cphA-02    | C16 | 35.02 | 82.42 | 1.95 | MultipleMeltPeaks            |
| dfrA1      | C16 |       |       |      | NoAmplification              |
| dfrA12     | C16 | 36.9  | 90.18 | 1.69 |                              |
| emrD       | C16 | 33.27 | 87.41 | 1.87 |                              |
| ereA       | C16 | 37.72 | 83.16 | 1.78 |                              |
| ereB       | C16 | 32.34 | 85.66 | 2.02 |                              |
| erm(34)    | C16 | 35.08 | 80.39 | 1.9  | MultipleMeltPeaks            |
| erm(35)    | C16 |       |       |      | CurveFitFailed               |
| erm(36)    | C16 | 30.98 | 85.96 | 1.93 |                              |
| ermA       | C16 |       |       |      | CurveFitFailed               |
| ermA/ermTR | C16 | 35.11 | 82.22 | 1.85 |                              |
| ermB       | C16 | 23.75 | 75.14 | 2.11 |                              |
| ermC       | C16 | 39.15 | 80.35 | 1.8  | MultipleMeltPeaks            |
| ermF       | C16 |       |       |      | LowEfficiency, CtIsSmall, S: |
| ermJ/ermD  | C16 |       |       |      | LowEfficiency, CtIsSmall, S: |
| ermK-01    | C16 | 38.5  | 74.82 | 1.84 | MultipleMeltPeaks            |
| ermK-02    | C16 | 33.68 | 88.68 | 1.81 |                              |
| ermT-01    | C16 |       |       |      | CurveFitFailed               |
| ermT-02    | C16 |       |       |      | CurveFitFailed               |
| ermX       | C16 | 36.13 | 83.53 | 1.69 | MultipleMeltPeaks            |
| ermY       | C16 |       |       |      | CurveFitFailed               |
| fabK       | C16 | 24.1  | 79.57 | 2.16 |                              |
| floR       | C16 | 35.66 | 86.81 | 1.77 | MultipleMeltPeaks            |
| folA       | C16 |       |       |      | NoAmplification              |
| fosB       | C16 |       |       |      | LowEfficiency, CtIsSmall, S: |
| fosX       | C16 |       |       |      | CurveFitFailed               |
| fox5       | C16 | 25.83 | 86.23 | 1.95 |                              |
| imiR       | C16 |       |       |      | NoAmplification              |
| ImrA-01    | C16 | 37.89 | 82.62 | 1.83 |                              |
| intl       | C16 | 29.92 | 84.73 | 1.98 |                              |
| intl1      | C16 | 20.3  | 87.42 | 1.99 | MultipleMeltPeaks            |
| IS613      | C16 |       |       |      | CurveFitFailed               |
| lnuA-01    | C16 |       |       |      | LowEfficiency, CtIsSmall, S: |
| lnuB-01    | C16 |       |       |      | LowEfficiency, CtIsSmall, S: |
| lnuB-02    | C16 |       |       |      | LowEfficiency, CtIsSmall, S: |

|               |     |       |       |      |                              |
|---------------|-----|-------|-------|------|------------------------------|
| lnuC          | C16 | 37.22 | 87.24 | 1.73 |                              |
| marR-01       | C16 | 31.49 | 89.46 | 1.98 |                              |
| matA/mel      | C16 | 19.91 | 77.79 | 2.05 |                              |
| mdet1         | C16 | 39.19 | 73.83 | 1.87 |                              |
| mdtA          | C16 | 38.77 | 75.91 | 1.76 |                              |
| mdtE/yhiU     | C16 | 35.55 | 90.32 | 1.77 |                              |
| mecA          | C16 |       |       |      | LowEfficiency, CtIsSmall, S: |
| mefA          | C16 | 18.95 | 80.28 | 1.99 | MultipleMeltPeaks            |
| mepA          | C16 | 29.02 | 88.36 | 1.93 |                              |
| mexA          | C16 | 37.42 | 82.35 | 1.76 | MultipleMeltPeaks            |
| mexD          | C16 | 31.23 | 80.37 | 2    |                              |
| mexE          | C16 | 36.22 | 87.17 | 1.83 |                              |
| mexF          | C16 | 22.73 | 85.98 | 1.97 | MultipleMeltPeaks            |
| mphA-01       | C16 | 29.32 | 86.61 | 1.96 |                              |
| mphA-02       | C16 | 29.13 | 87.35 | 2.28 | MultipleMeltPeaks            |
| mphB          | C16 | 39.3  | 88.28 | 1.74 |                              |
| mphC          | C16 | 37.33 | 86.21 | 1.76 | MultipleMeltPeaks            |
| msrA-01       | C16 |       |       |      | LowEfficiency, CtIsSmall, S: |
| msrC-01       | C16 |       |       |      | NoAmplification              |
| mtrC-01       | C16 | 35.29 | 83.54 | 1.87 |                              |
| mtrC-02       | C16 | 30.28 | 84.35 | 1.94 |                              |
| mtrD-02       | C16 | 26.99 | 82.72 | 2    |                              |
| mtrD-03       | C16 | 28.74 | 84.72 | 1.91 |                              |
| NDM1          | C16 | 32.04 | 90.71 | 1.89 |                              |
| nimE          | C16 | 38.18 | 75.42 | 1.95 |                              |
| nisB          | C16 | 36.21 | 81.95 | 1.88 |                              |
| oleC          | C16 | 32.03 | 90.02 | 1.86 |                              |
| oprD          | C16 | 26.18 | 91.8  | 1.89 |                              |
| oprJ          | C16 | 27.03 | 91.47 | 1.9  |                              |
| pbp           | C16 |       |       |      | CurveFitFailed               |
| pbp2x         | C16 |       |       |      | NoAmplification              |
| Pbp5          | C16 |       |       |      | LowEfficiency, CtIsSmall, S: |
| penA          | C16 | 31.97 | 87.18 | 1.82 |                              |
| pikR1         | C16 |       |       |      | CurveFitFailed               |
| pikR2         | C16 | 29.88 | 85.3  | 2.09 |                              |
| pmrA          | C16 | 22.03 | 79.15 | 2.11 |                              |
| pncA          | C16 | 24.9  | 89.97 | 1.91 |                              |
| putative mult | C16 | 32.14 | 84.07 | 1.95 |                              |
| qac           | C16 | 37.79 | 79    | 1.87 |                              |
| qacA          | C16 |       |       |      | CurveFitFailed               |
| qacA/qacB     | C16 |       |       |      | CurveFitFailed               |
| qacEdelta1-0  | C16 |       |       |      | LowEfficiency, CtIsSmall, S: |
| qacEdelta1-0  | C16 | 30.39 | 77.22 | 1.97 | MultipleMeltPeaks            |
| qacH-01       | C16 | 30.5  | 88.06 | 1.92 |                              |
| qacH-02       | C16 | 37.27 | 83.53 | 1.63 | MultipleMeltPeaks            |
| qnrA          | C16 | 29.41 | 84.69 | 1.99 |                              |

|              |     |       |       |      |                              |
|--------------|-----|-------|-------|------|------------------------------|
| rarD-02      | C16 | 37.34 | 82.69 | 1.82 |                              |
| sat4         | C16 |       |       |      | CurveFitFailed               |
| sdeB         | C16 |       |       |      | LowEfficiency, CtIsSmall, S: |
| spcN-01      | C16 | 37.42 | 85.44 | 1.75 |                              |
| speA         | C16 |       |       |      | NoAmplification              |
| str          | C16 |       |       |      | LowEfficiency, CtIsSmall, S: |
| strA         | C16 |       |       |      | CurveFitFailed               |
| strB         | C16 | 24.67 | 84.09 | 1.94 |                              |
| sul1         | C16 | 35.19 | 87.77 | 1.75 |                              |
| sul2         | C16 | 24.27 | 86.01 | 1.95 |                              |
| sulA/foIP-01 | C16 | 19.52 | 80.94 | 1.99 |                              |
| sulA/foIP-03 | C16 | 19.74 | 82.5  | 2.01 |                              |
| tet(32)      | C16 | 28.2  | 81.1  | 1.97 |                              |
| tet(34)      | C16 | 32.66 | 75.52 | 2.01 |                              |
| tet(35)      | C16 |       |       |      | NoAmplification              |
| tet(36)-A    | C16 |       |       |      | CurveFitFailed               |
| tet(36)-B    | C16 |       |       |      | LowEfficiency, CtIsSmall, S: |
| tet(37)      | C16 | 23.94 | 76.51 | 1.99 |                              |
| tetA-01      | C16 | 31.69 | 85.03 | 1.85 |                              |
| tetA-02      | C16 | 33.68 | 83.24 | 1.9  | MultipleMeltPeaks            |
| tetB-01      | C16 | 24.17 | 85.98 | 1.98 |                              |
| tetB-02      | C16 | 23.67 | 79.74 | 2    |                              |
| tetC-01      | C16 | 24.15 | 75.55 | 1.99 |                              |
| tetC-02      | C16 | 23.45 | 76.14 | 2.07 |                              |
| tetD-01      | C16 |       |       |      | LowEfficiency, CtIsSmall, C: |
| tetD-02      | C16 |       |       |      | CurveFitFailed               |
| tetE         | C16 | 34.69 | 86.25 | 1.89 |                              |
| tetG-01      | C16 | 29.72 | 86.33 | 1.92 | MultipleMeltPeaks            |
| tetG-02      | C16 | 28.96 | 88.06 | 1.92 |                              |
| tetH         | C16 |       |       |      | NoAmplification              |
| tetJ         | C16 |       |       |      | LowEfficiency, CtIsSmall, S: |
| tetK         | C16 |       |       |      | CurveFitFailed               |
| tetL-01      | C16 | 36.48 | 79.33 | 1.77 | MultipleMeltPeaks            |
| tetL-02      | C16 | 26.62 | 78.72 | 2.01 |                              |
| tetM-01      | C16 | 20.01 | 76.4  | 1.99 |                              |
| tetM-02      | C16 | 20.12 | 77.67 | 2.01 |                              |
| tetO-01      | C16 | 22.51 | 76.96 | 2.06 |                              |
| tetPA        | C16 |       |       |      | NoAmplification              |
| tetPB-01     | C16 |       |       |      | NoAmplification              |
| tetPB-02     | C16 | 28.27 | 84.9  | 2    | MultipleMeltPeaks            |
| tetPB-03     | C16 |       |       |      | CurveFitFailed               |
| tetPB-05     | C16 |       |       |      | LowEfficiency, CtIsSmall, S: |
| tetQ         | C16 | 25.52 | 76.79 | 2.05 |                              |
| tetR-02      | C16 | 30.86 | 90.46 | 1.93 | MultipleMeltPeaks            |
| tetR-03      | C16 | 23.74 | 76.23 | 1.98 |                              |
| tetS         | C16 | 38.17 | 87.33 | 1.84 | MultipleMeltPeaks            |

|             |     |       |       |      |                              |
|-------------|-----|-------|-------|------|------------------------------|
| tetT        | C16 |       |       |      | NoAmplification              |
| tetU-01     | C16 |       |       |      | CurveFitFailed               |
| tetV        | C16 |       |       |      | CurveFitFailed               |
| tetW-01     | C16 | 23.99 | 81.87 | 1.99 |                              |
| tetX        | C16 |       |       |      | LowEfficiency, CtIsSmall, Ci |
| tnpA-01     | C16 |       |       |      | BadR2, LowEfficiency, CtIsS  |
| tnpA-02     | C16 | 32.97 | 86.07 | 1.8  |                              |
| tnpA-03     | C16 | 27.32 | 77.51 | 2.09 |                              |
| tnpA-04     | C16 |       |       |      | LowEfficiency, CtIsSmall, Ci |
| tnpA-05     | C16 | 37.01 | 76.08 | 1.86 |                              |
| tnpA-07     | C16 |       |       |      | NoAmplification              |
| tolC-01     | C16 | 34.08 | 83.79 | 1.82 | MultipleMeltPeaks            |
| tolC-02     | C16 | 31.94 | 91.4  | 1.91 | MultipleMeltPeaks            |
| tolC-03     | C16 | 30.31 | 85.1  | 1.94 |                              |
| Tp614       | C16 | 33.2  | 83.5  | 1.94 |                              |
| ttgA        | C16 |       |       |      | BadR2, LowEfficiency, CtIsS  |
| ttgB        | C16 | 35.35 | 85.13 | 1.86 |                              |
| vanA        | C16 |       |       |      | NoAmplification              |
| vanB-01     | C16 | 31.39 | 84.46 | 2.01 |                              |
| vanC-01     | C16 |       |       |      | CurveFitFailed               |
| vanC-02     | C16 |       |       |      | CurveFitFailed               |
| vanC-03     | C16 | 27.6  | 91.2  | 1.99 |                              |
| vanC1       | C16 |       |       |      | CurveFitFailed               |
| vanC2/vanC3 | C16 | 29.98 | 82.91 | 2.08 |                              |
| vanG        | C16 |       |       |      | CurveFitFailed               |
| vanHB       | C16 | 31.24 | 85.89 | 1.94 |                              |
| vanHD       | C16 | 36.37 | 82.68 | 1.82 |                              |
| vanRA-01    | C16 | 43.32 | 80.03 | 1.62 | MultipleMeltPeaks            |
| vanRA-02    | C16 | 39.6  | 78.9  | 1.71 | MultipleMeltPeaks            |
| vanRB       | C16 | 31.04 | 82.76 | 2    |                              |
| vanRC       | C16 |       |       |      | LowEfficiency, CtIsSmall, S: |
| vanRC4      | C16 |       |       |      | CurveFitFailed               |
| vanRD       | C16 |       |       |      | CurveFitFailed               |
| vanSA       | C16 |       |       |      | BadR2, LowEfficiency, CtIsS  |
| vanSB       | C16 | 29.43 | 74.75 | 2.01 |                              |
| vanSC-01    | C16 | 33.37 | 77.56 | 2.06 |                              |
| vanSC-02    | C16 |       |       |      | NoAmplification              |
| vanTC-01    | C16 |       |       |      | LowEfficiency, CtIsSmall, S: |
| vanTC-02    | C16 | 31.08 | 86.34 | 1.87 |                              |
| vanTE       | C16 | 35.88 | 77.71 | 1.75 | MultipleMeltPeaks            |
| vanTG       | C16 |       |       |      | CurveFitFailed               |
| vanWB       | C16 |       |       |      | NoAmplification              |
| vanWG       | C16 | 34.55 | 81.71 | 1.96 |                              |
| vanXA       | C16 |       |       |      | CurveFitFailed               |
| vanXB       | C16 |       |       |      | NoAmplification              |
| vanXD       | C16 | 31.19 | 75.05 | 2.03 |                              |

|              |     |       |       |      |                              |
|--------------|-----|-------|-------|------|------------------------------|
| vanYB        | C16 | 35.89 | 85.23 | 1.91 |                              |
| vanYD-01     | C16 | 31.7  | 89.19 | 1.59 |                              |
| vanYD-02     | C16 |       |       |      | NoAmplification              |
| vatB-01      | C16 |       |       |      | CurveFitFailed               |
| vatB-02      | C16 | 35.17 | 82.26 | 1.89 |                              |
| vatC-01      | C16 | 33.29 | 81.27 | 1.9  |                              |
| vatC-02      | C16 | 40.35 | 62.73 | 1.77 | MultipleMeltPeaks            |
| vatE-01      | C16 | 28.85 | 77.26 | 2.03 | MultipleMeltPeaks            |
| vatE-02      | C16 |       |       |      | NoAmplification              |
| vgaA-01      | C16 |       |       |      | LowEfficiency, CtIsSmall, S: |
| vgaA-02      | C16 |       |       |      | CurveFitFailed               |
| vgb-01       | C16 | 31.15 | 82.95 | 1.92 | MultipleMeltPeaks            |
| vgbB-01      | C16 |       |       |      | CurveFitFailed               |
| vgbB-02      | C16 |       |       |      | CurveFitFailed               |
| yceE/mdtG-0  | C16 | 35.06 | 77.52 | 1.94 |                              |
| yceE/mdtG-0  | C16 | 36.03 | 81.03 | 1.89 |                              |
| yceL/mdtH-0  | C16 | 29.24 | 85.93 | 1.96 |                              |
| yceL/mdtH-0  | C16 |       |       |      | NoAmplification              |
| yceL/mdtH-0  | C16 | 34.91 | 81.51 | 1.89 |                              |
| yidY/mdtL-01 | C16 | 30.98 | 88.62 | 1.93 |                              |
| yidY/mdtL-02 | C16 |       |       |      | BadR2, LowEfficiency, CtIsS  |



| Assay          | Sample | Ct | Tm    | Efficiency | Flags                  |
|----------------|--------|----|-------|------------|------------------------|
| 16S rRNA       | C17    |    | 18.28 | 82.08      | 2.02                   |
| aac            | C17    |    | 31.26 | 81.02      | 1.97                   |
| aac(6')-Ib(akz | C17    |    |       |            | CurveFitFailed         |
| aac(6')-Ib(akz | C17    |    | 33.22 | 81.61      | 1.96 MultipleMeltPeaks |
| aac(6')-Ib(akz | C17    |    |       |            | CurveFitFailed         |
| aac(6')-II     | C17    |    | 37.82 | 81.07      | 1.54                   |
| aac(6')I1      | C17    |    | 35.43 | 88.33      | 1.8                    |
| aacA/aphD      | C17    |    |       |            | NoAmplification        |
| aacC           | C17    |    | 28.2  | 85.38      | 1.88 MultipleMeltPeaks |
| aacC1          | C17    |    |       |            | NoAmplification        |
| aacC2          | C17    |    | 33.62 | 84.59      | 1.91                   |
| aacC4          | C17    |    | 37.35 | 79.45      | 1.66 MultipleMeltPeaks |
| aadA-01        | C17    |    |       |            | CurveFitFailed         |
| aadA-02        | C17    |    |       |            | CurveFitFailed         |
| aadA-1-01      | C17    |    | 33.65 | 81.45      | 1.91                   |
| aadA-1-02      | C17    |    |       |            | NoAmplification        |
| aadA1          | C17    |    | 31.77 | 83.92      | 1.95 MultipleMeltPeaks |
| aadA2-01       | C17    |    |       |            | NoAmplification        |
| aadA2-02       | C17    |    |       |            | NoAmplification        |
| aadA2-03       | C17    |    |       |            | NoAmplification        |
| aadA5-01       | C17    |    |       |            | CurveFitFailed         |
| aadA5-02       | C17    |    | 31.42 | 86.79      | 1.96 MultipleMeltPeaks |
| aadA9-01       | C17    |    | 37.2  | 80.48      | 1.88                   |
| aadA9-02       | C17    |    | 36.23 | 73.63      | 1.89                   |
| aadD           | C17    |    |       |            | NoAmplification        |
| aadE           | C17    |    |       |            | NoAmplification        |
| acrA-01        | C17    |    | 30.58 | 88.69      | 1.9                    |
| acrA-02        | C17    |    | 39.87 | 61.62      | 1.79 MultipleMeltPeaks |
| acrA-03        | C17    |    |       |            | CurveFitFailed         |
| acrA-04        | C17    |    | 32.29 | 80.37      | 1.96                   |
| acrA-05        | C17    |    | 31.57 | 79.97      | 1.93 MultipleMeltPeaks |
| acrB-01        | C17    |    | 38.81 | 74.95      | 1.87                   |
| acrF           | C17    |    | 32.54 | 81.88      | 2 MultipleMeltPeaks    |
| acrR-01        | C17    |    | 32.57 | 84.76      | 1.91                   |
| acrR-02        | C17    |    | 34.18 | 86.82      | 1.87                   |
| Actin          | C17    |    | 23.63 | 87.12      | 1.96 MultipleMeltPeaks |
| adeA           | C17    |    |       |            | CurveFitFailed         |
| ampC-01        | C17    |    | 34.24 | 78.72      | 1.92                   |
| ampC-02        | C17    |    | 36.69 | 86.24      | 1.86                   |
| ampC-04        | C17    |    | 30.15 | 86.23      | 1.87                   |
| ampC-05        | C17    |    | 40.68 | 86.6       | 1.61 MultipleMeltPeaks |
| ampC-06        | C17    |    | 35.36 | 82.4       | 1.89                   |
| ampC-07        | C17    |    | 34.67 | 88.27      | 1.84 MultipleMeltPeaks |
| ampC-09        | C17    |    | 37.22 | 62.01      | 1.58 MultipleMeltPeaks |
| ampC/blaDH     | C17    |    | 32.28 | 76.89      | 2 MultipleMeltPeaks    |

|                          |     |       |       |      |                           |
|--------------------------|-----|-------|-------|------|---------------------------|
| aph                      | C17 |       |       |      | NoAmplification           |
| aph(2')-Id-01            | C17 |       |       |      | NoAmplification           |
| aph(2')-Id-02            | C17 |       |       |      | NoAmplification           |
| aph6ia                   | C17 | 28.44 | 78.47 | 1.96 |                           |
| aphA1(aka k <sub>z</sub> | C17 |       |       |      | NoAmplification           |
| bacA-01                  | C17 |       |       |      | CurveFitFailed            |
| bacA-02                  | C17 | 28.99 | 83.43 | 1.85 |                           |
| BETA-globin              | C17 | 24.85 | 83.92 | 1.98 | MultipleMeltPeaks         |
| bla-ACC-1                | C17 | 39.28 | 80.02 | 1.69 | MultipleMeltPeaks         |
| bla-L1                   | C17 | 30.58 | 85.91 | 1.92 |                           |
| bla1                     | C17 |       |       |      | NoAmplification           |
| blaCMY                   | C17 |       |       |      | NoAmplification           |
| blaCMY2-01               | C17 |       |       |      | NoAmplification           |
| blaCMY2-02               | C17 | 29.43 | 82.91 | 1.95 |                           |
| blaCTX-M-01              | C17 | 33.19 | 86.68 | 1.97 |                           |
| blaCTX-M-02              | C17 | 30.09 | 81.98 | 1.88 | MultipleMeltPeaks         |
| blaCTX-M-03              | C17 |       |       |      | CurveFitFailed            |
| blaCTX-M-04              | C17 | 35.81 | 85.15 | 1.77 |                           |
| blaCTX-M-05              | C17 | 29.53 | 76.86 | 1.75 |                           |
| blaCTX-M-06              | C17 |       |       |      | NoAmplification           |
| blaGES                   | C17 |       |       |      | NoAmplification           |
| blaIMP-01                | C17 |       |       |      | NoAmplification           |
| blaIMP-02                | C17 |       |       |      | NoAmplification           |
| blaMOX/blaC              | C17 |       |       |      | NoAmplification           |
| blaOCH                   | C17 |       |       |      | NoAmplification           |
| blaOKP                   | C17 |       |       |      | NoAmplification           |
| blaOXA1/blaC             | C17 |       |       |      | NoAmplification           |
| blaOXA10-01              | C17 |       |       |      | NoAmplification           |
| blaOXA10-02              | C17 |       |       |      | NoAmplification           |
| blaOXY                   | C17 | 36.73 | 88.95 | 1.72 |                           |
| blaPAO                   | C17 |       |       |      | NoAmplification           |
| blaPER                   | C17 |       |       |      | CurveFitFailed            |
| blaPSE                   | C17 |       |       |      | NoAmplification           |
| blaROB                   | C17 |       |       |      | NoAmplification           |
| blaSFO                   | C17 | 31.67 | 87.04 | 1.94 |                           |
| blaSHV-01                | C17 | 36.28 | 87.73 | 1.63 |                           |
| blaSHV-02                | C17 |       |       |      | CtIsLarge, CurveFitFailed |
| blaTEM                   | C17 |       |       |      | NoAmplification           |
| blaTLA                   | C17 |       |       |      | NoAmplification           |
| blaVEB                   | C17 |       |       |      | NoAmplification           |
| blaVIM                   | C17 |       |       |      | NoAmplification           |
| blaZ                     | C17 |       |       |      | NoAmplification           |
| carB                     | C17 |       |       |      | NoAmplification           |
| catA1                    | C17 |       |       |      | NoAmplification           |
| catB3                    | C17 |       |       |      | NoAmplification           |
| catB8                    | C17 | 29.12 | 81.51 | 1.93 | MultipleMeltPeaks         |

|            |     |       |       |      |                              |
|------------|-----|-------|-------|------|------------------------------|
| ceoA       | C17 | 29.19 | 82.34 | 1.94 |                              |
| cepA       | C17 |       |       |      | NoAmplification              |
| cfiA       | C17 | 33.97 | 86.25 | 1.95 | MultipleMeltPeaks            |
| cfr        | C17 |       |       |      | NoAmplification              |
| cfxA       | C17 | 24.31 | 77.64 | 2.06 |                              |
| cmeA       | C17 | 43.99 | 62.78 | 1.81 | BadR2, MultipleMeltPeaks     |
| cmlA1-01   | C17 |       |       |      | CurveFitFailed               |
| cmlA1-02   | C17 |       |       |      | CurveFitFailed               |
| cmr        | C17 |       |       |      | CurveFitFailed               |
| cmx(A)     | C17 | 29.91 | 84.5  | 1.97 | MultipleMeltPeaks            |
| cphA-01    | C17 | 32.45 | 85.88 | 1.96 | MultipleMeltPeaks            |
| cphA-02    | C17 | 36.09 | 82.47 | 1.86 |                              |
| dfrA1      | C17 |       |       |      | NoAmplification              |
| dfrA12     | C17 | 32.44 | 84.24 | 1.95 |                              |
| emrD       | C17 | 34.62 | 90.42 | 1.81 |                              |
| ereA       | C17 |       |       |      | NoAmplification              |
| ereB       | C17 | 37.32 | 83.64 | 1.67 |                              |
| erm(34)    | C17 | 39.11 | 87.42 | 1.64 |                              |
| erm(35)    | C17 |       |       |      | NoAmplification              |
| erm(36)    | C17 | 33.39 | 81.03 | 2.07 | MultipleMeltPeaks            |
| ermA       | C17 |       |       |      | NoAmplification              |
| ermA/ermTR | C17 |       |       |      | NoAmplification              |
| ermB       | C17 | 28.7  | 75.13 | 2.08 |                              |
| ermC       | C17 |       |       |      | NoAmplification              |
| ermF       | C17 |       |       |      | NoAmplification              |
| ermJ/ermD  | C17 |       |       |      | NoAmplification              |
| ermK-01    | C17 | 27.78 | 75.86 | 2.04 |                              |
| ermK-02    | C17 | 36.02 | 85.59 | 1.85 | MultipleMeltPeaks            |
| ermT-01    | C17 |       |       |      | NoAmplification              |
| ermT-02    | C17 |       |       |      | NoAmplification              |
| ermX       | C17 | 38.36 | 83.55 | 1.64 | MultipleMeltPeaks            |
| ermY       | C17 |       |       |      | NoAmplification              |
| fabK       | C17 | 27.75 | 79.33 | 2.08 |                              |
| floR       | C17 |       |       |      | NoAmplification              |
| folA       | C17 |       |       |      | NoAmplification              |
| fosB       | C17 |       |       |      | LowEfficiency, CtIsSmall, S: |
| fosX       | C17 |       |       |      | NoAmplification              |
| fox5       | C17 | 27.19 | 86.26 | 1.96 |                              |
| imiR       | C17 |       |       |      | SaturationBaselineRatiolsL   |
| ImrA-01    | C17 |       |       |      | NoAmplification              |
| intl       | C17 | 29.21 | 88.07 | 1.96 |                              |
| intl1      | C17 | 23.12 | 86.92 | 1.98 |                              |
| IS613      | C17 | 23.47 | 79.67 | 2.05 |                              |
| lnuA-01    | C17 |       |       |      | NoAmplification              |
| lnuB-01    | C17 |       |       |      | NoAmplification              |
| lnuB-02    | C17 |       |       |      | NoAmplification              |

|               |     |       |       |      |                   |
|---------------|-----|-------|-------|------|-------------------|
| lnuC          | C17 |       |       |      | CurveFitFailed    |
| marR-01       | C17 | 37.21 | 82.44 | 1.82 |                   |
| matA/mel      | C17 | 21.63 | 77.64 | 2.07 |                   |
| mdet1         | C17 |       |       |      | NoAmplification   |
| mdtA          | C17 |       |       |      | NoAmplification   |
| mdtE/yhiU     | C17 | 31.96 | 82.81 | 1.95 | MultipleMeltPeaks |
| mecA          | C17 |       |       |      | NoAmplification   |
| mefA          | C17 | 20.97 | 80.51 | 1.97 |                   |
| mepA          | C17 | 29.72 | 81.4  | 1.96 |                   |
| mexA          | C17 |       |       |      | NoAmplification   |
| mexD          | C17 | 31.26 | 80.39 | 2.02 |                   |
| mexE          | C17 |       |       |      | NoAmplification   |
| mexF          | C17 | 27.73 | 89.62 | 2.06 |                   |
| mphA-01       | C17 | 33.04 | 86.77 | 1.99 |                   |
| mphA-02       | C17 | 31.43 | 83.02 | 2.09 | MultipleMeltPeaks |
| mphB          | C17 |       |       |      | NoAmplification   |
| mphC          | C17 |       |       |      | NoAmplification   |
| msrA-01       | C17 |       |       |      | NoAmplification   |
| msrC-01       | C17 |       |       |      | NoAmplification   |
| mtrC-01       | C17 | 34.57 | 83.12 | 1.87 |                   |
| mtrC-02       | C17 | 31.26 | 83.11 | 1.96 |                   |
| mtrD-02       | C17 | 28.48 | 83.83 | 2.04 |                   |
| mtrD-03       | C17 | 33.15 | 85.38 | 1.9  |                   |
| NDM1          | C17 |       |       |      | NoAmplification   |
| nimE          | C17 | 36.44 | 75.57 | 1.98 |                   |
| nisB          | C17 |       |       |      | NoAmplification   |
| oleC          | C17 | 31.48 | 87.59 | 1.94 |                   |
| oprD          | C17 | 30.88 | 87.12 | 1.95 | MultipleMeltPeaks |
| oprJ          | C17 | 33.34 | 88.51 | 1.87 |                   |
| pbp           | C17 | 35.43 | 79.22 | 1.85 |                   |
| pbp2x         | C17 |       |       |      | NoAmplification   |
| Pbp5          | C17 |       |       |      | NoAmplification   |
| penA          | C17 |       |       |      | NoAmplification   |
| pikR1         | C17 | 38.43 | 82.61 | 1.77 |                   |
| pikR2         | C17 | 31.32 | 91.51 | 1.98 | MultipleMeltPeaks |
| pmrA          | C17 |       |       |      | NoAmplification   |
| pncA          | C17 | 29.6  | 90    | 1.89 |                   |
| putative mulI | C17 |       |       |      | CurveFitFailed    |
| qac           | C17 |       |       |      | NoAmplification   |
| qacA          | C17 | 36.6  | 70.58 | 1.83 |                   |
| qacA/qacB     | C17 |       |       |      | NoAmplification   |
| qacEdelta1-0  | C17 |       |       |      | NoAmplification   |
| qacEdelta1-0  | C17 | 33.86 | 85.1  | 1.98 |                   |
| qacH-01       | C17 | 29.08 | 87.99 | 1.91 |                   |
| qacH-02       | C17 | 36.51 | 83.98 | 1.66 |                   |
| qnrA          | C17 |       |       |      | NoAmplification   |

|              |     |       |       |      |                   |
|--------------|-----|-------|-------|------|-------------------|
| rarD-02      | C17 |       |       |      | NoAmplification   |
| sat4         | C17 |       |       |      | NoAmplification   |
| sdeB         | C17 |       |       |      | CurveFitFailed    |
| spcN-01      | C17 |       |       |      | NoAmplification   |
| speA         | C17 |       |       |      | NoAmplification   |
| str          | C17 |       |       |      | NoAmplification   |
| strA         | C17 |       |       |      | NoAmplification   |
| strB         | C17 |       |       |      | CurveFitFailed    |
| sul1         | C17 | 35.77 | 82.44 | 1.7  | MultipleMeltPeaks |
| sul2         | C17 | 39.6  | 81.27 | 1.62 |                   |
| sulA/foIP-01 | C17 | 23.83 | 80.83 | 1.97 |                   |
| sulA/foIP-03 | C17 | 23.81 | 82.59 | 1.97 |                   |
| tet(32)      | C17 |       |       |      | NoAmplification   |
| tet(34)      | C17 | 30.47 | 75.95 | 2.01 |                   |
| tet(35)      | C17 | 35.29 | 76.33 | 1.96 |                   |
| tet(36)-A    | C17 | 32.79 | 81.9  | 1.97 |                   |
| tet(36)-B    | C17 |       |       |      | NoAmplification   |
| tet(37)      | C17 | 25.62 | 76.55 | 1.99 |                   |
| tetA-01      | C17 | 34.32 | 85.05 | 1.9  |                   |
| tetA-02      | C17 |       |       |      | CurveFitFailed    |
| tetB-01      | C17 | 37.54 | 86.58 | 1.76 |                   |
| tetB-02      | C17 |       |       |      | NoAmplification   |
| tetC-01      | C17 |       |       |      | NoAmplification   |
| tetC-02      | C17 |       |       |      | NoAmplification   |
| tetD-01      | C17 |       |       |      | NoAmplification   |
| tetD-02      | C17 | 31.04 | 77.98 | 2.02 |                   |
| tetE         | C17 |       |       |      | NoAmplification   |
| tetG-01      | C17 | 29.8  | 89.79 | 1.99 |                   |
| tetG-02      | C17 | 33.45 | 87.14 | 1.87 |                   |
| tetH         | C17 |       |       |      | NoAmplification   |
| tetJ         | C17 |       |       |      | NoAmplification   |
| tetK         | C17 |       |       |      | NoAmplification   |
| tetL-01      | C17 |       |       |      | NoAmplification   |
| tetL-02      | C17 | 33.28 | 85.22 | 1.8  |                   |
| tetM-01      | C17 | 22.56 | 76.4  | 2    |                   |
| tetM-02      | C17 | 22.76 | 77.74 | 2.01 |                   |
| tetO-01      | C17 |       |       |      | NoAmplification   |
| tetPA        | C17 |       |       |      | NoAmplification   |
| tetPB-01     | C17 |       |       |      | NoAmplification   |
| tetPB-02     | C17 | 30.82 | 84.75 | 1.99 |                   |
| tetPB-03     | C17 |       |       |      | NoAmplification   |
| tetPB-05     | C17 |       |       |      | CurveFitFailed    |
| tetQ         | C17 | 24.8  | 76.56 | 2.02 |                   |
| tetR-02      | C17 | 32.71 | 85.64 | 1.89 |                   |
| tetR-03      | C17 |       |       |      | NoAmplification   |
| tetS         | C17 |       |       |      | NoAmplification   |

|             |     |       |       |      |                   |
|-------------|-----|-------|-------|------|-------------------|
| tetT        | C17 |       |       |      | NoAmplification   |
| tetU-01     | C17 |       |       |      | NoAmplification   |
| tetV        | C17 |       |       |      | NoAmplification   |
| tetW-01     | C17 |       |       |      | NoAmplification   |
| tetX        | C17 | 28.49 | 75.89 | 2.03 |                   |
| tnpA-01     | C17 |       |       |      | NoAmplification   |
| tnpA-02     | C17 | 33.88 | 84.46 | 1.85 |                   |
| tnpA-03     | C17 | 36    | 77.6  | 1.9  |                   |
| tnpA-04     | C17 | 44.46 | 74.72 | 1.42 | MultipleMeltPeaks |
| tnpA-05     | C17 | 35.64 | 83.43 | 1.83 |                   |
| tnpA-07     | C17 |       |       |      | NoAmplification   |
| tolC-01     | C17 | 35.98 | 81.11 | 1.82 | MultipleMeltPeaks |
| tolC-02     | C17 | 33.74 | 83.77 | 1.88 | MultipleMeltPeaks |
| tolC-03     | C17 | 33.13 | 84.63 | 1.93 |                   |
| Tp614       | C17 | 37.49 | 82.85 | 1.81 |                   |
| ttgA        | C17 |       |       |      | NoAmplification   |
| ttgB        | C17 | 36.61 | 81.13 | 1.84 |                   |
| vanA        | C17 |       |       |      | NoAmplification   |
| vanB-01     | C17 |       |       |      | CurveFitFailed    |
| vanC-01     | C17 |       |       |      | NoAmplification   |
| vanC-02     | C17 |       |       |      | NoAmplification   |
| vanC-03     | C17 | 29.87 | 84.57 | 1.9  |                   |
| vanC1       | C17 |       |       |      | NoAmplification   |
| vanC2/vanC3 | C17 | 36.78 | 80.75 | 1.82 | MultipleMeltPeaks |
| vanG        | C17 |       |       |      | NoAmplification   |
| vanHB       | C17 |       |       |      | NoAmplification   |
| vanHD       | C17 |       |       |      | CurveFitFailed    |
| vanRA-01    | C17 |       |       |      | NoAmplification   |
| vanRA-02    | C17 |       |       |      | NoAmplification   |
| vanRB       | C17 | 35.42 | 87.38 | 1.89 | MultipleMeltPeaks |
| vanRC       | C17 |       |       |      | NoAmplification   |
| vanRC4      | C17 |       |       |      | NoAmplification   |
| vanRD       | C17 |       |       |      | NoAmplification   |
| vanSA       | C17 |       |       |      | NoAmplification   |
| vanSB       | C17 | 28.42 | 74.85 | 2.06 |                   |
| vanSC-01    | C17 | 44.47 | 62.09 | 1.6  | MultipleMeltPeaks |
| vanSC-02    | C17 |       |       |      | NoAmplification   |
| vanTC-01    | C17 |       |       |      | NoAmplification   |
| vanTC-02    | C17 | 34.34 | 86.34 | 1.78 |                   |
| vanTE       | C17 |       |       |      | CurveFitFailed    |
| vanTG       | C17 |       |       |      | NoAmplification   |
| vanWB       | C17 |       |       |      | NoAmplification   |
| vanWG       | C17 | 33.99 | 74.78 | 2    |                   |
| vanXA       | C17 |       |       |      | CurveFitFailed    |
| vanXB       | C17 | 36.79 | 74.94 | 1.94 |                   |
| vanXD       | C17 | 32.55 | 75.03 | 2.03 |                   |

|              |     |       |       |      |                   |
|--------------|-----|-------|-------|------|-------------------|
| vanYB        | C17 | 39.23 | 82.47 | 1.79 |                   |
| vanYD-01     | C17 | 36.13 | 89.13 | 1.74 | MultipleMeltPeaks |
| vanYD-02     | C17 |       |       |      | NoAmplification   |
| vatB-01      | C17 |       |       |      | CurveFitFailed    |
| vatB-02      | C17 | 38.77 | 77.43 | 1.81 | MultipleMeltPeaks |
| vatC-01      | C17 | 32.74 | 81.33 | 1.92 |                   |
| vatC-02      | C17 | 39.85 | 87.62 | 1.76 | MultipleMeltPeaks |
| vatE-01      | C17 | 29.11 | 77.05 | 2.13 |                   |
| vatE-02      | C17 |       |       |      | CurveFitFailed    |
| vgaA-01      | C17 |       |       |      | NoAmplification   |
| vgaA-02      | C17 |       |       |      | CurveFitFailed    |
| vgb-01       | C17 |       |       |      | CurveFitFailed    |
| vgbB-01      | C17 |       |       |      | CurveFitFailed    |
| vgbB-02      | C17 |       |       |      | NoAmplification   |
| yceE/mdtG-0  | C17 |       |       |      | NoAmplification   |
| yceE/mdtG-0  | C17 | 35.29 | 81.17 | 1.9  |                   |
| yceL/mdtH-0  | C17 | 28.43 | 76.33 | 2    |                   |
| yceL/mdtH-0  | C17 |       |       |      | NoAmplification   |
| yceL/mdtH-0  | C17 | 42.4  | 87.5  | 1.58 | MultipleMeltPeaks |
| yidY/mdtL-01 | C17 | 31.6  | 82.68 | 1.94 |                   |
| yidY/mdtL-02 | C17 |       |       |      | NoAmplification   |

| Assay          | Sample | Ct | Tm    | Efficiency | Flags                       |
|----------------|--------|----|-------|------------|-----------------------------|
| 16S rRNA       | C18    |    | 19.77 | 82.13      | 2                           |
| aac            | C18    |    | 30.62 | 86.45      | 1.78 MultipleMeltPeaks      |
| aac(6')-Ib(akz | C18    |    |       |            | BadR2, LowEfficiency, CtIsS |
| aac(6')-Ib(akz | C18    |    | 31.32 | 86.35      | 2                           |
| aac(6')-Ib(akz | C18    |    | 33.15 | 81.24      | 1.96 MultipleMeltPeaks      |
| aac(6')-II     | C18    |    | 32.29 | 81.15      | 1.67                        |
| aac(6')I1      | C18    |    | 37.91 | 85.81      | 1.83 MultipleMeltPeaks      |
| aacA/aphD      | C18    |    |       |            | CurveFitFailed              |
| aacC           | C18    |    | 31.09 | 92.19      | 1.88 MultipleMeltPeaks      |
| aacC1          | C18    |    |       |            | CurveFitFailed              |
| aacC2          | C18    |    |       |            | NoAmplification             |
| aacC4          | C18    |    | 32.46 | 78.34      | 1.93 MultipleMeltPeaks      |
| aadA-01        | C18    |    |       |            | NoAmplification             |
| aadA-02        | C18    |    |       |            | BadR2, LowEfficiency, CtIsS |
| aadA-1-01      | C18    |    | 32.4  | 81.33      | 1.93                        |
| aadA-1-02      | C18    |    |       |            | CurveFitFailed              |
| aadA1          | C18    |    | 31.62 | 85.45      | 2.02 MultipleMeltPeaks      |
| aadA2-01       | C18    |    | 36.33 | 77.02      | 1.82                        |
| aadA2-02       | C18    |    | 30.06 | 75.44      | 2.06                        |
| aadA2-03       | C18    |    | 29.4  | 79.54      | 1.96                        |
| aadA5-01       | C18    |    | 31.32 | 84.43      | 2 MultipleMeltPeaks         |
| aadA5-02       | C18    |    | 30.9  | 86.77      | 2.01 MultipleMeltPeaks      |
| aadA9-01       | C18    |    | 37.48 | 84.3       | 1.77                        |
| aadA9-02       | C18    |    | 37.62 | 73.7       | 1.93                        |
| aadD           | C18    |    |       |            | NoAmplification             |
| aadE           | C18    |    |       |            | NoAmplification             |
| acrA-01        | C18    |    | 27    | 88.7       | 1.96 MultipleMeltPeaks      |
| acrA-02        | C18    |    | 41.32 | 62.72      | 1.68 MultipleMeltPeaks      |
| acrA-03        | C18    |    | 29.25 | 78.57      | 1.96                        |
| acrA-04        | C18    |    | 29.15 | 80.67      | 1.96                        |
| acrA-05        | C18    |    | 28.97 | 91.27      | 1.95                        |
| acrB-01        | C18    |    |       |            | NoAmplification             |
| acrF           | C18    |    | 30.34 | 84.56      | 1.96 MultipleMeltPeaks      |
| acrR-01        | C18    |    | 34.83 | 81.19      | 1.89                        |
| acrR-02        | C18    |    | 35.61 | 86.1       | 1.83                        |
| Actin          | C18    |    | 21.9  | 87.15      | 1.98                        |
| adeA           | C18    |    | 34.56 | 88.07      | 1.89                        |
| ampC-01        | C18    |    | 31.92 | 84.72      | 1.97 MultipleMeltPeaks      |
| ampC-02        | C18    |    | 35.46 | 87.17      | 2.03 MultipleMeltPeaks      |
| ampC-04        | C18    |    | 30.7  | 79.56      | 1.9                         |
| ampC-05        | C18    |    |       |            | NoAmplification             |
| ampC-06        | C18    |    | 37.04 | 75.89      | 1.84 MultipleMeltPeaks      |
| ampC-07        | C18    |    | 35.51 | 82.41      | 1.84 MultipleMeltPeaks      |
| ampC-09        | C18    |    |       |            | NoAmplification             |
| ampC/blaDH     | C18    |    | 28.89 | 84.76      | 1.98 MultipleMeltPeaks      |



|                          |     |       |       |      |                              |
|--------------------------|-----|-------|-------|------|------------------------------|
| aph                      | C18 |       |       |      | LowEfficiency, CtIsSmall, Ci |
| aph(2')-Id-01            | C18 |       |       |      | NoAmplification              |
| aph(2')-Id-02            | C18 |       |       |      | NoAmplification              |
| aph6ia                   | C18 | 29.25 | 78.36 | 1.95 |                              |
| aphA1(aka k <sub>z</sub> | C18 |       |       |      | LowEfficiency, CtIsSmall, Ci |
| bacA-01                  | C18 | 38.77 | 62.57 | 1.69 | MultipleMeltPeaks            |
| bacA-02                  | C18 | 33.05 | 83.53 | 1.81 |                              |
| BETA-globin              | C18 | 23.19 | 83.97 | 1.99 |                              |
| bla-ACC-1                | C18 | 34    | 85.82 | 1.9  |                              |
| bla-L1                   | C18 | 28.42 | 85.82 | 1.96 |                              |
| bla1                     | C18 |       |       |      | LowEfficiency, CtIsSmall, Ci |
| blaCMY                   | C18 |       |       |      | CurveFitFailed               |
| blaCMY2-01               | C18 | 37.94 | 79.21 | 1.78 |                              |
| blaCMY2-02               | C18 | 28.57 | 84.03 | 2    | MultipleMeltPeaks            |
| blaCTX-M-01              | C18 | 36.25 | 76.82 | 2.18 |                              |
| blaCTX-M-02              | C18 | 31.88 | 79.62 | 1.89 | MultipleMeltPeaks            |
| blaCTX-M-03              | C18 |       |       |      | LowEfficiency, CtIsSmall, Ci |
| blaCTX-M-04              | C18 | 31.11 | 87.78 | 1.94 |                              |
| blaCTX-M-05              | C18 | 30.03 | 76.88 | 1.79 |                              |
| blaCTX-M-06              | C18 |       |       |      | NoAmplification              |
| blaGES                   | C18 |       |       |      | NoAmplification              |
| blaIMP-01                | C18 |       |       |      | NoAmplification              |
| blaIMP-02                | C18 |       |       |      | LowEfficiency, CtIsSmall, Ci |
| blaMOX/blaC              | C18 | 34.26 | 82.31 | 1.94 |                              |
| blaOCH                   | C18 |       |       |      | NoAmplification              |
| blaOKP                   | C18 |       |       |      | NoAmplification              |
| blaOXA1/blaC             | C18 |       |       |      | NoAmplification              |
| blaOXA10-01              | C18 |       |       |      | NoAmplification              |
| blaOXA10-02              | C18 |       |       |      | NoAmplification              |
| blaOXY                   | C18 | 36.19 | 88.43 | 1.71 | MultipleMeltPeaks            |
| blaPAO                   | C18 |       |       |      | NoAmplification              |
| blaPER                   | C18 |       |       |      | CurveFitFailed               |
| blaPSE                   | C18 |       |       |      | NoAmplification              |
| blaROB                   | C18 |       |       |      | NoAmplification              |
| blaSFO                   | C18 | 32.89 | 80.23 | 1.98 | MultipleMeltPeaks            |
| blaSHV-01                | C18 | 35.48 | 72.8  | 1.78 | MultipleMeltPeaks            |
| blaSHV-02                | C18 | 36.49 | 78.56 | 1.79 | MultipleMeltPeaks            |
| blaTEM                   | C18 | 35.41 | 83.46 | 1.88 | MultipleMeltPeaks            |
| blaTLA                   | C18 |       |       |      | LowEfficiency, CtIsSmall, Ci |
| blaVEB                   | C18 |       |       |      | NoAmplification              |
| blaVIM                   | C18 |       |       |      | NoAmplification              |
| blaZ                     | C18 |       |       |      | NoAmplification              |
| carB                     | C18 |       |       |      | NoAmplification              |
| catA1                    | C18 |       |       |      | NoAmplification              |
| catB3                    | C18 | 38.86 | 79.88 | 1.77 | MultipleMeltPeaks            |
| catB8                    | C18 | 27.54 | 82.8  | 1.96 | MultipleMeltPeaks            |

|            |     |       |       |      |                              |
|------------|-----|-------|-------|------|------------------------------|
| ceoA       | C18 | 27.12 | 82.33 | 1.95 | MultipleMeltPeaks            |
| cepA       | C18 |       |       |      | NoAmplification              |
| cfiA       | C18 | 33.83 | 86.11 | 1.89 |                              |
| cfr        | C18 |       |       |      | LowEfficiency, CtIsSmall, Ci |
| cfxA       | C18 | 24.91 | 77.61 | 2.08 |                              |
| cmeA       | C18 | 36.09 | 85    | 1.79 |                              |
| cmlA1-01   | C18 |       |       |      | NoAmplification              |
| cmlA1-02   | C18 |       |       |      | CurveFitFailed               |
| cmr        | C18 |       |       |      | CtIsLarge, CurveFitFailed    |
| cmx(A)     | C18 | 26.88 | 84.41 | 2    |                              |
| cphA-01    | C18 | 30.81 | 85.49 | 1.96 | MultipleMeltPeaks            |
| cphA-02    | C18 | 34.76 | 82.32 | 1.96 |                              |
| dfrA1      | C18 | 36.71 | 78.66 | 1.86 |                              |
| dfrA12     | C18 | 36.34 | 85.57 | 1.71 | MultipleMeltPeaks            |
| emrD       | C18 | 36.37 | 86.85 | 1.73 |                              |
| ereA       | C18 | 39.11 | 82.73 | 1.8  |                              |
| ereB       | C18 | 38.04 | 88.38 | 1.74 | MultipleMeltPeaks            |
| erm(34)    | C18 |       |       |      | NoAmplification              |
| erm(35)    | C18 |       |       |      | CurveFitFailed               |
| erm(36)    | C18 | 34.1  | 84.75 | 1.99 |                              |
| ermA       | C18 |       |       |      | LowEfficiency, CtIsSmall, Ci |
| ermA/ermTR | C18 | 39.97 | 80.99 | 1.74 |                              |
| ermB       | C18 |       |       |      | NoAmplification              |
| ermC       | C18 |       |       |      | LowEfficiency, CtIsSmall, S: |
| ermF       | C18 |       |       |      | LowEfficiency, CtIsSmall, S: |
| ermJ/ermD  | C18 |       |       |      | BadR2, LowEfficiency, CtIsS  |
| ermK-01    | C18 |       |       |      | BadR2, LowEfficiency, CtIsS  |
| ermK-02    | C18 | 32.43 | 85.54 | 1.93 |                              |
| ermT-01    | C18 |       |       |      | NoAmplification              |
| ermT-02    | C18 |       |       |      | LowEfficiency, CtIsSmall, Ci |
| ermX       | C18 | 34.96 | 85.74 | 1.73 |                              |
| ermY       | C18 |       |       |      | LowEfficiency, CtIsSmall, Ci |
| fabK       | C18 | 25.77 | 79.05 | 2.11 |                              |
| floR       | C18 | 37.39 | 89.29 | 1.72 | MultipleMeltPeaks            |
| folA       | C18 |       |       |      | NoAmplification              |
| fosB       | C18 |       |       |      | CurveFitFailed               |
| fosX       | C18 |       |       |      | NoAmplification              |
| fox5       | C18 | 27.1  | 87.09 | 1.99 |                              |
| imiR       | C18 |       |       |      | NoAmplification              |
| ImrA-01    | C18 | 37.8  | 82.66 | 2.06 | MultipleMeltPeaks            |
| intl       | C18 | 29.61 | 84.75 | 1.96 | MultipleMeltPeaks            |
| intl1      | C18 | 21.61 | 86.86 | 2.01 |                              |
| IS613      | C18 | 25.33 | 79.6  | 2.06 |                              |
| lnuA-01    | C18 |       |       |      | LowEfficiency, CtIsSmall, S: |
| lnuB-01    | C18 |       |       |      | LowEfficiency, CtIsSmall, S: |
| lnuB-02    | C18 |       |       |      | LowEfficiency, CtIsSmall, Ci |

|               |     |       |       |      |                              |
|---------------|-----|-------|-------|------|------------------------------|
| lnuC          | C18 | 37.85 | 84.05 | 1.59 | MultipleMeltPeaks            |
| marR-01       | C18 | 36.81 | 85.46 | 1.82 |                              |
| matA/mel      | C18 | 24.28 | 77.62 | 2.04 |                              |
| mdetI1        | C18 |       |       |      | CurveFitFailed               |
| mdtA          | C18 | 38.28 | 79.87 | 1.75 | MultipleMeltPeaks            |
| mdtE/yhiU     | C18 |       |       |      | NoAmplification              |
| mecA          | C18 |       |       |      | NoAmplification              |
| mefA          | C18 | 23.18 | 80.49 | 1.96 |                              |
| mepA          | C18 | 29.71 | 80.83 | 2    | MultipleMeltPeaks            |
| mexA          | C18 | 34.24 | 87.2  | 1.9  |                              |
| mexD          | C18 | 30.72 | 80.44 | 2.01 |                              |
| mexE          | C18 | 33.42 | 83.24 | 1.93 |                              |
| mexF          | C18 | 29.86 | 87.48 | 2.05 | MultipleMeltPeaks            |
| mphA-01       | C18 | 30.53 | 88.89 | 1.99 |                              |
| mphA-02       | C18 | 29.85 | 86.78 | 2.29 |                              |
| mphB          | C18 |       |       |      | BadR2, LowEfficiency, CtIs5  |
| mphC          | C18 | 35.13 | 85.55 | 1.88 |                              |
| msrA-01       | C18 |       |       |      | NoAmplification              |
| msrC-01       | C18 |       |       |      | NoAmplification              |
| mtrC-01       | C18 | 33.64 | 83.1  | 1.82 |                              |
| mtrC-02       | C18 | 32.47 | 84.2  | 1.98 |                              |
| mtrD-02       | C18 | 27.28 | 83.18 | 2.02 | MultipleMeltPeaks            |
| mtrD-03       | C18 |       |       |      | NoAmplification              |
| NDM1          | C18 | 36.49 | 85.53 | 1.83 |                              |
| nimE          | C18 |       |       |      | NoAmplification              |
| nisB          | C18 |       |       |      | NoAmplification              |
| oleC          | C18 | 37.28 | 87.53 | 1.77 |                              |
| oprD          | C18 | 29.34 | 83.3  | 2.02 |                              |
| oprJ          | C18 | 37.62 | 74.78 | 1.83 | MultipleMeltPeaks            |
| pbp           | C18 |       |       |      | LowEfficiency, CtIsSmall, Ci |
| pbp2x         | C18 | 30.09 | 75.46 | 1.97 |                              |
| Pbp5          | C18 |       |       |      | LowEfficiency, CtIsSmall, Ci |
| penA          | C18 | 36.62 | 87.36 | 1.72 |                              |
| pikR1         | C18 | 38.23 | 69.17 | 1.79 | MultipleMeltPeaks            |
| pikR2         | C18 | 31.77 | 84.73 | 2.03 |                              |
| pmrA          | C18 | 25.18 | 79.06 | 2.11 |                              |
| pncA          | C18 | 28.55 | 89.96 | 1.93 |                              |
| putative mult | C18 | 31.01 | 84.11 | 1.97 |                              |
| qac           | C18 |       |       |      | BadR2, LowEfficiency, CtIs5  |
| qacA          | C18 | 35.52 | 70.4  | 1.89 |                              |
| qacA/qacB     | C18 | 40.58 | 84.53 | 1.4  | MultipleMeltPeaks            |
| qacEdelta1-0  | C18 |       |       |      | NoAmplification              |
| qacEdelta1-0  | C18 | 33.48 | 78.27 | 2.01 |                              |
| qacH-01       | C18 | 30.58 | 86.37 | 1.92 |                              |
| qacH-02       | C18 | 35.85 | 83.87 | 1.63 |                              |
| qnrA          | C18 | 32.79 | 80.35 | 2    |                              |

|              |     |       |       |      |                              |
|--------------|-----|-------|-------|------|------------------------------|
| rarD-02      | C18 | 35.34 | 85.87 | 1.86 |                              |
| sat4         | C18 |       |       |      | LowEfficiency, CtIsSmall, Ci |
| sdeB         | C18 |       |       |      | CurveFitFailed               |
| spcN-01      | C18 | 44.99 | 78.72 | 1.54 | MultipleMeltPeaks            |
| speA         | C18 |       |       |      | NoAmplification              |
| str          | C18 |       |       |      | NoAmplification              |
| strA         | C18 |       |       |      | LowEfficiency, CtIsSmall, Ci |
| strB         | C18 | 31.4  | 79.25 | 1.97 |                              |
| sul1         | C18 | 34.26 | 85.73 | 1.78 | MultipleMeltPeaks            |
| sul2         | C18 |       |       |      | LowEfficiency, CtIsSmall, Ci |
| sulA/foIP-01 | C18 | 24.22 | 81.12 | 1.99 |                              |
| sulA/foIP-03 | C18 | 23.85 | 83.33 | 2.02 |                              |
| tet(32)      | C18 | 28.77 | 81.09 | 1.98 |                              |
| tet(34)      | C18 | 29.89 | 76.03 | 2    |                              |
| tet(35)      | C18 | 34.54 | 76.55 | 2.01 |                              |
| tet(36)-A    | C18 | 36.33 | 81.94 | 1.8  |                              |
| tet(36)-B    | C18 |       |       |      | NoAmplification              |
| tet(37)      | C18 | 26.33 | 76.15 | 2.01 | MultipleMeltPeaks            |
| tetA-01      | C18 | 30.22 | 85.12 | 1.91 |                              |
| tetA-02      | C18 |       |       |      | CurveFitFailed               |
| tetB-01      | C18 | 27.95 | 79.54 | 1.98 |                              |
| tetB-02      | C18 | 29.99 | 75.45 | 2.05 |                              |
| tetC-01      | C18 | 30.11 | 75.22 | 2    |                              |
| tetC-02      | C18 | 28.56 | 76.04 | 2.05 |                              |
| tetD-01      | C18 |       |       |      | LowEfficiency, CtIsSmall, Ci |
| tetD-02      | C18 | 35.75 | 76.39 | 2.03 |                              |
| tetE         | C18 |       |       |      | NoAmplification              |
| tetG-01      | C18 | 32.96 | 82.29 | 1.95 |                              |
| tetG-02      | C18 |       |       |      | CurveFitFailed               |
| tetH         | C18 |       |       |      | NoAmplification              |
| tetJ         | C18 |       |       |      | LowEfficiency, CtIsSmall, Ci |
| tetK         | C18 |       |       |      | LowEfficiency, CtIsSmall, S  |
| tetL-01      | C18 | 37.02 | 81.27 | 1.84 |                              |
| tetL-02      | C18 | 32.06 | 85.23 | 1.82 |                              |
| tetM-01      | C18 | 23.82 | 76.14 | 2.01 |                              |
| tetM-02      | C18 | 24.04 | 77.61 | 2.03 |                              |
| tetO-01      | C18 | 27.02 | 76.84 | 2.05 |                              |
| tetPA        | C18 |       |       |      | NoAmplification              |
| tetPB-01     | C18 |       |       |      | NoAmplification              |
| tetPB-02     | C18 | 28.29 | 84.81 | 1.99 |                              |
| tetPB-03     | C18 |       |       |      | LowEfficiency, CtIsSmall, Ci |
| tetPB-05     | C18 |       |       |      | LowEfficiency, CtIsSmall, S  |
| tetQ         | C18 | 26.88 | 76.72 | 2.05 |                              |
| tetR-02      | C18 | 33.84 | 90.21 | 1.84 | MultipleMeltPeaks            |
| tetR-03      | C18 | 27.3  | 76.33 | 1.98 |                              |
| tetS         | C18 | 38.52 | 85.33 | 1.91 | MultipleMeltPeaks            |

|             |     |       |       |      |                              |
|-------------|-----|-------|-------|------|------------------------------|
| tetT        | C18 | 32.93 | 74.36 | 2.05 |                              |
| tetU-01     | C18 |       |       |      | NoAmplification              |
| tetV        | C18 |       |       |      | NoAmplification              |
| tetW-01     | C18 |       |       |      | LowEfficiency, CtIsSmall, Ci |
| tetX        | C18 |       |       |      | CtIsSmall, SaturationBaseli  |
| tnpA-01     | C18 |       |       |      | NoAmplification              |
| tnpA-02     | C18 | 32.2  | 86.14 | 1.82 |                              |
| tnpA-03     | C18 | 35.26 | 74.45 | 2.11 |                              |
| tnpA-04     | C18 | 28.39 | 82.39 | 1.95 |                              |
| tnpA-05     | C18 | 38.89 | 76.27 | 1.78 | MultipleMeltPeaks            |
| tnpA-07     | C18 |       |       |      | NoAmplification              |
| tolC-01     | C18 | 36.22 | 79.37 | 1.8  | MultipleMeltPeaks            |
| tolC-02     | C18 | 31.03 | 84.95 | 1.92 | MultipleMeltPeaks            |
| tolC-03     | C18 | 31.15 | 85.15 | 1.94 |                              |
| Tp614       | C18 | 31.69 | 83.42 | 1.94 |                              |
| ttgA        | C18 | 37.95 | 81.68 | 2.07 |                              |
| ttgB        | C18 | 37.57 | 81    | 1.79 |                              |
| vanA        | C18 |       |       |      | NoAmplification              |
| vanB-01     | C18 | 32.31 | 85.73 | 2.03 |                              |
| vanC-01     | C18 |       |       |      | NoAmplification              |
| vanC-02     | C18 |       |       |      | LowEfficiency, CtIsSmall, Ci |
| vanC-03     | C18 | 29.05 | 86.21 | 1.94 |                              |
| vanC1       | C18 |       |       |      | NoAmplification              |
| vanC2/vanC3 | C18 | 36    | 80.06 | 1.89 |                              |
| vanG        | C18 |       |       |      | LowEfficiency, CtIsSmall, Ci |
| vanHB       | C18 |       |       |      | NoAmplification              |
| vanHD       | C18 | 36.17 | 74.82 | 1.87 |                              |
| vanRA-01    | C18 |       |       |      | NoAmplification              |
| vanRA-02    | C18 |       |       |      | NoAmplification              |
| vanRB       | C18 | 32.41 | 85.55 | 1.98 |                              |
| vanRC       | C18 |       |       |      | LowEfficiency, CtIsSmall, Ci |
| vanRC4      | C18 |       |       |      | LowEfficiency, CtIsSmall, S  |
| vanRD       | C18 |       |       |      | NoAmplification              |
| vanSA       | C18 |       |       |      | NoAmplification              |
| vanSB       | C18 | 28.54 | 74.78 | 2.05 |                              |
| vanSC-01    | C18 |       |       |      | CtIsLarge, CurveFitFailed    |
| vanSC-02    | C18 | 33.13 | 75.92 | 1.92 |                              |
| vanTC-01    | C18 |       |       |      | LowEfficiency, CtIsSmall, Ci |
| vanTC-02    | C18 |       |       |      | CurveFitFailed               |
| vanTE       | C18 |       |       |      | CurveFitFailed               |
| vanTG       | C18 | 35.25 | 74.39 | 1.98 |                              |
| vanWB       | C18 |       |       |      | NoAmplification              |
| vanWG       | C18 | 35.4  | 75.25 | 1.96 |                              |
| vanXA       | C18 |       |       |      | LowEfficiency, CtIsSmall, S  |
| vanXB       | C18 |       |       |      | NoAmplification              |
| vanXD       | C18 | 30.89 | 75.09 | 2.03 |                              |

|              |     |       |       |      |                              |
|--------------|-----|-------|-------|------|------------------------------|
| vanYB        | C18 |       |       |      | LowEfficiency, CtIsSmall, S: |
| vanYD-01     | C18 | 35.3  | 81.23 | 1.8  |                              |
| vanYD-02     | C18 |       |       |      | NoAmplification              |
| vatB-01      | C18 | 33.42 | 75.13 | 2.01 |                              |
| vatB-02      | C18 | 37.64 | 81.06 | 1.77 |                              |
| vatC-01      | C18 | 35.39 | 81.2  | 1.86 |                              |
| vatC-02      | C18 | 32.82 | 83.27 | 1.9  |                              |
| vatE-01      | C18 | 29.35 | 77.18 | 2.13 |                              |
| vatE-02      | C18 |       |       |      | NoAmplification              |
| vgaA-01      | C18 |       |       |      | LowEfficiency, CtIsSmall, C: |
| vgaA-02      | C18 |       |       |      | CurveFitFailed               |
| vgb-01       | C18 | 35.71 | 81.63 | 1.84 |                              |
| vgbB-01      | C18 | 36.96 | 83.26 | 1.7  |                              |
| vgbB-02      | C18 |       |       |      | NoAmplification              |
| yceE/mdtG-0  | C18 | 35.59 | 77.45 | 1.92 | MultipleMeltPeaks            |
| yceE/mdtG-0  | C18 | 37.57 | 81.1  | 1.83 |                              |
| yceL/mdtH-0  | C18 | 29.48 | 75.89 | 1.95 | MultipleMeltPeaks            |
| yceL/mdtH-0  | C18 |       |       |      | NoAmplification              |
| yceL/mdtH-0  | C18 | 36.6  | 77.54 | 1.73 | MultipleMeltPeaks            |
| yidY/mdtL-01 | C18 | 29.49 | 85.04 | 1.97 | MultipleMeltPeaks            |
| yidY/mdtL-02 | C18 |       |       |      | LowEfficiency, CtIsSmall, C: |

| Assay          | Sample | Ct | Tm    | Efficiency | Flags                  |
|----------------|--------|----|-------|------------|------------------------|
| 16S rRNA       | C19    |    | 19.41 | 82.2       | 1.98                   |
| aac            | C19    |    | 36.06 | 80.5       | 1.76                   |
| aac(6')-Ib(akz | C19    |    |       |            | NoAmplification        |
| aac(6')-Ib(akz | C19    |    | 38.35 | 81.16      | 1.75                   |
| aac(6')-Ib(akz | C19    |    |       |            | NoAmplification        |
| aac(6')-II     | C19    |    |       |            | CurveFitFailed         |
| aac(6')I1      | C19    |    |       |            | NoAmplification        |
| aacA/aphD      | C19    |    |       |            | NoAmplification        |
| aacC           | C19    |    | 31.23 | 91.99      | 1.82 MultipleMeltPeaks |
| aacC1          | C19    |    |       |            | NoAmplification        |
| aacC2          | C19    |    |       |            | NoAmplification        |
| aacC4          | C19    |    | 37.3  | 84.19      | 1.71 MultipleMeltPeaks |
| aadA-01        | C19    |    |       |            | NoAmplification        |
| aadA-02        | C19    |    |       |            | NoAmplification        |
| aadA-1-01      | C19    |    |       |            | NoAmplification        |
| aadA-1-02      | C19    |    |       |            | NoAmplification        |
| aadA1          | C19    |    | 37.99 | 84.33      | 1.81                   |
| aadA2-01       | C19    |    |       |            | NoAmplification        |
| aadA2-02       | C19    |    |       |            | NoAmplification        |
| aadA2-03       | C19    |    |       |            | NoAmplification        |
| aadA5-01       | C19    |    |       |            | NoAmplification        |
| aadA5-02       | C19    |    | 32.67 | 78.19      | 1.97 MultipleMeltPeaks |
| aadA9-01       | C19    |    |       |            | CurveFitFailed         |
| aadA9-02       | C19    |    |       |            | NoAmplification        |
| aadD           | C19    |    |       |            | NoAmplification        |
| aadE           | C19    |    |       |            | NoAmplification        |
| acrA-01        | C19    |    |       |            | NoAmplification        |
| acrA-02        | C19    |    |       |            | CurveFitFailed         |
| acrA-03        | C19    |    |       |            | CurveFitFailed         |
| acrA-04        | C19    |    | 36.29 | 88.65      | 1.77                   |
| acrA-05        | C19    |    | 27.82 | 82.46      | 1.93                   |
| acrB-01        | C19    |    |       |            | CurveFitFailed         |
| acrF           | C19    |    | 30.88 | 83.02      | 1.81                   |
| acrR-01        | C19    |    | 37.08 | 81.25      | 1.86                   |
| acrR-02        | C19    |    |       |            | NoAmplification        |
| Actin          | C19    |    | 25.72 | 87.07      | 1.93 MultipleMeltPeaks |
| adeA           | C19    |    |       |            | NoAmplification        |
| ampC-01        | C19    |    | 35.66 | 79.94      | 1.91                   |
| ampC-02        | C19    |    |       |            | NoAmplification        |
| ampC-04        | C19    |    | 34.04 | 86.85      | 1.98                   |
| ampC-05        | C19    |    |       |            | NoAmplification        |
| ampC-06        | C19    |    |       |            | NoAmplification        |
| ampC-07        | C19    |    |       |            | NoAmplification        |
| ampC-09        | C19    |    | 31.65 | 86.77      | 1.88                   |
| ampC/blaDH     | C19    |    | 36.79 | 75.33      | 1.84 MultipleMeltPeaks |

|                          |     |       |       |      |                   |
|--------------------------|-----|-------|-------|------|-------------------|
| aph                      | C19 |       |       |      | NoAmplification   |
| aph(2')-Id-01            | C19 |       |       |      | NoAmplification   |
| aph(2')-Id-02            | C19 |       |       |      | NoAmplification   |
| aph6ia                   | C19 |       |       |      | NoAmplification   |
| aphA1(aka k <sub>z</sub> | C19 | 38.31 | 77.5  | 1.45 |                   |
| bacA-01                  | C19 |       |       |      | NoAmplification   |
| bacA-02                  | C19 | 31.31 | 83.45 | 1.85 |                   |
| BETA-globin              | C19 | 26.92 | 83.97 | 1.99 |                   |
| bla-ACC-1                | C19 |       |       |      | NoAmplification   |
| bla-L1                   | C19 |       |       |      | NoAmplification   |
| bla1                     | C19 |       |       |      | NoAmplification   |
| blaCMY                   | C19 |       |       |      | NoAmplification   |
| blaCMY2-01               | C19 | 34.61 | 79.2  | 1.97 |                   |
| blaCMY2-02               | C19 | 37.08 | 81.59 | 1.68 |                   |
| blaCTX-M-01              | C19 |       |       |      | NoAmplification   |
| blaCTX-M-02              | C19 | 37.56 | 79.26 | 1.63 | MultipleMeltPeaks |
| blaCTX-M-03              | C19 |       |       |      | NoAmplification   |
| blaCTX-M-04              | C19 | 33.1  | 89.31 | 1.88 | MultipleMeltPeaks |
| blaCTX-M-05              | C19 | 31.11 | 76.53 | 1.77 |                   |
| blaCTX-M-06              | C19 |       |       |      | NoAmplification   |
| blaGES                   | C19 |       |       |      | NoAmplification   |
| blaIMP-01                | C19 |       |       |      | NoAmplification   |
| blaIMP-02                | C19 |       |       |      | NoAmplification   |
| blaMOX/blaC              | C19 |       |       |      | NoAmplification   |
| blaOCH                   | C19 |       |       |      | NoAmplification   |
| blaOKP                   | C19 |       |       |      | NoAmplification   |
| blaOXA1/blaC             | C19 |       |       |      | NoAmplification   |
| blaOXA10-01              | C19 |       |       |      | NoAmplification   |
| blaOXA10-02              | C19 |       |       |      | NoAmplification   |
| blaOXY                   | C19 | 36.95 | 88.37 | 1.71 |                   |
| blaPAO                   | C19 |       |       |      | NoAmplification   |
| blaPER                   | C19 |       |       |      | NoAmplification   |
| blaPSE                   | C19 |       |       |      | NoAmplification   |
| blaROB                   | C19 |       |       |      | NoAmplification   |
| blaSFO                   | C19 | 32.97 | 83.17 | 1.9  |                   |
| blaSHV-01                | C19 |       |       |      | NoAmplification   |
| blaSHV-02                | C19 |       |       |      | NoAmplification   |
| blaTEM                   | C19 | 23.91 | 79.58 | 2.02 |                   |
| blaTLA                   | C19 |       |       |      | NoAmplification   |
| blaVEB                   | C19 |       |       |      | NoAmplification   |
| blaVIM                   | C19 | 37.67 | 88.73 | 1.8  |                   |
| blaZ                     | C19 |       |       |      | NoAmplification   |
| carB                     | C19 | 37.31 | 88.69 | 1.77 |                   |
| catA1                    | C19 |       |       |      | NoAmplification   |
| catB3                    | C19 |       |       |      | NoAmplification   |
| catB8                    | C19 | 31.89 | 81.86 | 1.91 |                   |



|            |     |       |       |      |                   |
|------------|-----|-------|-------|------|-------------------|
| ceoA       | C19 |       |       |      | CurveFitFailed    |
| cepA       | C19 |       |       |      | NoAmplification   |
| cfiA       | C19 |       |       |      | NoAmplification   |
| cfr        | C19 |       |       |      | NoAmplification   |
| cfxA       | C19 | 25.42 | 77.5  | 2.06 |                   |
| cmeA       | C19 |       |       |      | NoAmplification   |
| cmlA1-01   | C19 |       |       |      | NoAmplification   |
| cmlA1-02   | C19 |       |       |      | NoAmplification   |
| cmr        | C19 |       |       |      | NoAmplification   |
| cmx(A)     | C19 | 31.17 | 84.47 | 1.91 |                   |
| cphA-01    | C19 |       |       |      | CurveFitFailed    |
| cphA-02    | C19 |       |       |      | CurveFitFailed    |
| dfrA1      | C19 |       |       |      | NoAmplification   |
| dfrA12     | C19 |       |       |      | NoAmplification   |
| emrD       | C19 |       |       |      | CurveFitFailed    |
| ereA       | C19 |       |       |      | NoAmplification   |
| ereB       | C19 |       |       |      | NoAmplification   |
| erm(34)    | C19 |       |       |      | NoAmplification   |
| erm(35)    | C19 |       |       |      | NoAmplification   |
| erm(36)    | C19 |       |       |      | CurveFitFailed    |
| ermA       | C19 |       |       |      | NoAmplification   |
| ermA/ermTR | C19 |       |       |      | NoAmplification   |
| ermB       | C19 |       |       |      | NoAmplification   |
| ermC       | C19 |       |       |      | NoAmplification   |
| ermF       | C19 |       |       |      | NoAmplification   |
| ermJ/ermD  | C19 |       |       |      | NoAmplification   |
| ermK-01    | C19 |       |       |      | NoAmplification   |
| ermK-02    | C19 |       |       |      | NoAmplification   |
| ermT-01    | C19 |       |       |      | NoAmplification   |
| ermT-02    | C19 |       |       |      | NoAmplification   |
| ermX       | C19 |       |       |      | NoAmplification   |
| ermY       | C19 |       |       |      | NoAmplification   |
| fabK       | C19 | 30.79 | 78.33 | 2.12 |                   |
| floR       | C19 |       |       |      | NoAmplification   |
| folA       | C19 |       |       |      | NoAmplification   |
| fosB       | C19 |       |       |      | CurveFitFailed    |
| fosX       | C19 |       |       |      | NoAmplification   |
| fox5       | C19 | 30.18 | 87.54 | 1.91 |                   |
| imiR       | C19 |       |       |      | CurveFitFailed    |
| lmrA-01    | C19 |       |       |      | NoAmplification   |
| intl       | C19 | 38.06 | 83.66 | 1.72 | MultipleMeltPeaks |
| intl1      | C19 | 24.11 | 87.04 | 1.99 |                   |
| IS613      | C19 | 26.51 | 79.54 | 2.05 |                   |
| lnuA-01    | C19 |       |       |      | NoAmplification   |
| lnuB-01    | C19 |       |       |      | NoAmplification   |
| lnuB-02    | C19 |       |       |      | NoAmplification   |

|               |     |       |       |      |                   |
|---------------|-----|-------|-------|------|-------------------|
| lnuC          | C19 |       |       |      | CurveFitFailed    |
| marR-01       | C19 |       |       |      | CurveFitFailed    |
| matA/mel      | C19 | 22.9  | 77.79 | 2.04 |                   |
| mdet1         | C19 |       |       |      | NoAmplification   |
| mdtA          | C19 |       |       |      | NoAmplification   |
| mdtE/yhiU     | C19 |       |       |      | NoAmplification   |
| mecA          | C19 |       |       |      | NoAmplification   |
| mefA          | C19 | 21.87 | 80.46 | 1.97 |                   |
| mepA          | C19 |       |       |      | CurveFitFailed    |
| mexA          | C19 |       |       |      | NoAmplification   |
| mexD          | C19 |       |       |      | NoAmplification   |
| mexE          | C19 |       |       |      | NoAmplification   |
| mexF          | C19 | 29.19 | 89.52 | 2.06 | MultipleMeltPeaks |
| mphA-01       | C19 | 38.13 | 90.63 | 1.65 |                   |
| mphA-02       | C19 | 33.91 | 76.07 | 1.58 | MultipleMeltPeaks |
| mphB          | C19 |       |       |      | NoAmplification   |
| mphC          | C19 |       |       |      | NoAmplification   |
| msrA-01       | C19 |       |       |      | NoAmplification   |
| msrC-01       | C19 |       |       |      | NoAmplification   |
| mtrC-01       | C19 |       |       |      | NoAmplification   |
| mtrC-02       | C19 |       |       |      | NoAmplification   |
| mtrD-02       | C19 | 32.48 | 80.84 | 1.98 |                   |
| mtrD-03       | C19 |       |       |      | CurveFitFailed    |
| NDM1          | C19 | 36.51 | 83.19 | 1.84 |                   |
| nimE          | C19 |       |       |      | NoAmplification   |
| nisB          | C19 | 37.98 | 81.9  | 1.76 |                   |
| oleC          | C19 |       |       |      | CurveFitFailed    |
| oprD          | C19 | 29.62 | 85.15 | 1.94 |                   |
| oprJ          | C19 | 33.27 | 86.84 | 1.95 |                   |
| pbp           | C19 |       |       |      | NoAmplification   |
| pbp2x         | C19 |       |       |      | NoAmplification   |
| Pbp5          | C19 |       |       |      | NoAmplification   |
| penA          | C19 |       |       |      | NoAmplification   |
| pikR1         | C19 |       |       |      | NoAmplification   |
| pikR2         | C19 | 35.19 | 84.51 | 1.86 |                   |
| pmrA          | C19 | 25.4  | 78.84 | 2.11 |                   |
| pncA          | C19 | 25.05 | 84.27 | 1.9  |                   |
| putative mulI | C19 |       |       |      | NoAmplification   |
| qac           | C19 |       |       |      | NoAmplification   |
| qacA          | C19 |       |       |      | NoAmplification   |
| qacA/qacB     | C19 |       |       |      | NoAmplification   |
| qacEdelta1-0  | C19 |       |       |      | NoAmplification   |
| qacEdelta1-0  | C19 | 32.24 | 84.86 | 1.92 | MultipleMeltPeaks |
| qacH-01       | C19 |       |       |      | CurveFitFailed    |
| qacH-02       | C19 |       |       |      | NoAmplification   |
| qnrA          | C19 |       |       |      | NoAmplification   |

|              |     |       |       |      |                   |
|--------------|-----|-------|-------|------|-------------------|
| rarD-02      | C19 |       |       |      | NoAmplification   |
| sat4         | C19 |       |       |      | NoAmplification   |
| sdeB         | C19 |       |       |      | NoAmplification   |
| spcN-01      | C19 |       |       |      | NoAmplification   |
| speA         | C19 |       |       |      | NoAmplification   |
| str          | C19 |       |       |      | NoAmplification   |
| strA         | C19 |       |       |      | NoAmplification   |
| strB         | C19 |       |       |      | NoAmplification   |
| sul1         | C19 |       |       |      | NoAmplification   |
| sul2         | C19 |       |       |      | NoAmplification   |
| sulA/foIP-01 | C19 | 24.71 | 81.68 | 1.96 |                   |
| sulA/foIP-03 | C19 | 24.65 | 83.54 | 1.97 |                   |
| tet(32)      | C19 | 26.53 | 81.14 | 1.98 |                   |
| tet(34)      | C19 | 28.43 | 75.96 | 2.01 |                   |
| tet(35)      | C19 |       |       |      | NoAmplification   |
| tet(36)-A    | C19 |       |       |      | NoAmplification   |
| tet(36)-B    | C19 |       |       |      | NoAmplification   |
| tet(37)      | C19 |       |       |      | NoAmplification   |
| tetA-01      | C19 |       |       |      | NoAmplification   |
| tetA-02      | C19 |       |       |      | NoAmplification   |
| tetB-01      | C19 | 27.44 | 79.6  | 1.96 |                   |
| tetB-02      | C19 | 26.31 | 79.53 | 1.99 |                   |
| tetC-01      | C19 | 28.72 | 75.17 | 2    |                   |
| tetC-02      | C19 | 27.8  | 75.96 | 2.02 |                   |
| tetD-01      | C19 |       |       |      | NoAmplification   |
| tetD-02      | C19 |       |       |      | NoAmplification   |
| tetE         | C19 |       |       |      | NoAmplification   |
| tetG-01      | C19 | 37.19 | 64.67 | 1.74 | MultipleMeltPeaks |
| tetG-02      | C19 | 31.06 | 87.18 | 1.9  |                   |
| tetH         | C19 |       |       |      | NoAmplification   |
| tetJ         | C19 |       |       |      | NoAmplification   |
| tetK         | C19 |       |       |      | NoAmplification   |
| tetL-01      | C19 |       |       |      | NoAmplification   |
| tetL-02      | C19 |       |       |      | NoAmplification   |
| tetM-01      | C19 | 24.71 | 75.83 | 1.99 |                   |
| tetM-02      | C19 | 24.74 | 77.46 | 2    |                   |
| tetO-01      | C19 |       |       |      | NoAmplification   |
| tetPA        | C19 |       |       |      | NoAmplification   |
| tetPB-01     | C19 |       |       |      | NoAmplification   |
| tetPB-02     | C19 | 36.9  | 77.26 | 1.82 |                   |
| tetPB-03     | C19 |       |       |      | NoAmplification   |
| tetPB-05     | C19 |       |       |      | NoAmplification   |
| tetQ         | C19 | 25.76 | 75.87 | 1.99 |                   |
| tetR-02      | C19 | 33.78 | 88.91 | 1.85 |                   |
| tetR-03      | C19 |       |       |      | NoAmplification   |
| tetS         | C19 |       |       |      | NoAmplification   |

|             |     |       |       |      |                   |
|-------------|-----|-------|-------|------|-------------------|
| tetT        | C19 |       |       |      | NoAmplification   |
| tetU-01     | C19 |       |       |      | NoAmplification   |
| tetV        | C19 |       |       |      | NoAmplification   |
| tetW-01     | C19 |       |       |      | NoAmplification   |
| tetX        | C19 |       |       |      | NoAmplification   |
| tnpA-01     | C19 |       |       |      | NoAmplification   |
| tnpA-02     | C19 | 38.86 | 87.04 | 1.61 | MultipleMeltPeaks |
| tnpA-03     | C19 | 38.2  | 62.61 | 1.83 | MultipleMeltPeaks |
| tnpA-04     | C19 |       |       |      | NoAmplification   |
| tnpA-05     | C19 |       |       |      | CurveFitFailed    |
| tnpA-07     | C19 |       |       |      | NoAmplification   |
| tolC-01     | C19 |       |       |      | NoAmplification   |
| tolC-02     | C19 | 35.23 | 84.37 | 1.85 |                   |
| tolC-03     | C19 | 36.51 | 85.47 | 1.76 |                   |
| Tp614       | C19 |       |       |      | NoAmplification   |
| ttgA        | C19 |       |       |      | NoAmplification   |
| ttgB        | C19 |       |       |      | CurveFitFailed    |
| vanA        | C19 |       |       |      | NoAmplification   |
| vanB-01     | C19 |       |       |      | CurveFitFailed    |
| vanC-01     | C19 |       |       |      | NoAmplification   |
| vanC-02     | C19 |       |       |      | NoAmplification   |
| vanC-03     | C19 | 30.14 | 83.87 | 1.93 |                   |
| vanC1       | C19 |       |       |      | NoAmplification   |
| vanC2/vanC3 | C19 | 38.01 | 86.08 | 1.77 |                   |
| vanG        | C19 |       |       |      | NoAmplification   |
| vanHB       | C19 |       |       |      | CurveFitFailed    |
| vanHD       | C19 |       |       |      | CurveFitFailed    |
| vanRA-01    | C19 |       |       |      | NoAmplification   |
| vanRA-02    | C19 |       |       |      | NoAmplification   |
| vanRB       | C19 |       |       |      | NoAmplification   |
| vanRC       | C19 |       |       |      | NoAmplification   |
| vanRC4      | C19 |       |       |      | NoAmplification   |
| vanRD       | C19 |       |       |      | NoAmplification   |
| vanSA       | C19 |       |       |      | NoAmplification   |
| vanSB       | C19 | 28.84 | 74.57 | 2.07 |                   |
| vanSC-01    | C19 |       |       |      | NoAmplification   |
| vanSC-02    | C19 |       |       |      | NoAmplification   |
| vanTC-01    | C19 |       |       |      | NoAmplification   |
| vanTC-02    | C19 | 31.59 | 82.85 | 1.97 |                   |
| vanTE       | C19 |       |       |      | NoAmplification   |
| vanTG       | C19 |       |       |      | NoAmplification   |
| vanWB       | C19 |       |       |      | NoAmplification   |
| vanWG       | C19 | 38.54 | 73.97 | 1.85 |                   |
| vanXA       | C19 |       |       |      | CurveFitFailed    |
| vanXB       | C19 |       |       |      | NoAmplification   |
| vanXD       | C19 | 29.84 | 75.54 | 2.02 |                   |

|              |     |       |      |      |                             |
|--------------|-----|-------|------|------|-----------------------------|
| vanYB        | C19 |       |      |      | NoAmplification             |
| vanYD-01     | C19 |       |      |      | CurveFitFailed              |
| vanYD-02     | C19 |       |      |      | NoAmplification             |
| vatB-01      | C19 |       |      |      | NoAmplification             |
| vatB-02      | C19 |       |      |      | NoAmplification             |
| vatC-01      | C19 |       |      |      | NoAmplification             |
| vatC-02      | C19 |       |      |      | NoAmplification             |
| vatE-01      | C19 | 28.69 | 77.3 | 2.11 |                             |
| vatE-02      | C19 |       |      |      | NoAmplification             |
| vgaA-01      | C19 |       |      |      | NoAmplification             |
| vgaA-02      | C19 |       |      |      | LowEfficiency, CurveFitFail |
| vgb-01       | C19 |       |      |      | CurveFitFailed              |
| vgbB-01      | C19 |       |      |      | NoAmplification             |
| vgbB-02      | C19 |       |      |      | NoAmplification             |
| yceE/mdtG-0  | C19 |       |      |      | NoAmplification             |
| yceE/mdtG-0  | C19 |       |      |      | NoAmplification             |
| yceL/mdtH-0  | C19 |       |      |      | CurveFitFailed              |
| yceL/mdtH-0  | C19 |       |      |      | NoAmplification             |
| yceL/mdtH-0  | C19 |       |      |      | NoAmplification             |
| yidY/mdtL-01 | C19 | 33.68 | 86.7 | 1.83 |                             |
| yidY/mdtL-02 | C19 | 35.37 | 75.4 | 1.96 |                             |

| Assay          | Sample | Ct | Tm    | Efficiency | Flags                  |
|----------------|--------|----|-------|------------|------------------------|
| 16S rRNA       | C20    |    | 20.59 | 82.27      | 1.98                   |
| aac            | C20    |    | 31.36 | 85.2       | 1.51 MultipleMeltPeaks |
| aac(6')-Ib(akz | C20    |    |       |            | NoAmplification        |
| aac(6')-Ib(akz | C20    |    | 33.31 | 84.67      | 1.97                   |
| aac(6')-Ib(akz | C20    |    | 33.91 | 77.92      | 1.97                   |
| aac(6')-II     | C20    |    | 38.26 | 81.2       | 1.56 MultipleMeltPeaks |
| aac(6')I1      | C20    |    | 44.09 | 88.01      | 1.62 MultipleMeltPeaks |
| aacA/aphD      | C20    |    |       |            | NoAmplification        |
| aacC           | C20    |    | 35.92 | 72.82      | 1.7 MultipleMeltPeaks  |
| aacC1          | C20    |    |       |            | NoAmplification        |
| aacC2          | C20    |    |       |            | NoAmplification        |
| aacC4          | C20    |    |       |            | NoAmplification        |
| aadA-01        | C20    |    |       |            | NoAmplification        |
| aadA-02        | C20    |    | 33.31 | 80.43      | 1.96                   |
| aadA-1-01      | C20    |    | 34.31 | 81.61      | 1.97                   |
| aadA-1-02      | C20    |    |       |            | NoAmplification        |
| aadA1          | C20    |    | 38.41 | 82.14      | 1.78 MultipleMeltPeaks |
| aadA2-01       | C20    |    |       |            | NoAmplification        |
| aadA2-02       | C20    |    | 35.05 | 75.07      | 1.98                   |
| aadA2-03       | C20    |    |       |            | NoAmplification        |
| aadA5-01       | C20    |    |       |            | CurveFitFailed         |
| aadA5-02       | C20    |    | 31.65 | 80.3       | 2 MultipleMeltPeaks    |
| aadA9-01       | C20    |    | 38.34 | 86.99      | 1.67 MultipleMeltPeaks |
| aadA9-02       | C20    |    |       |            | NoAmplification        |
| aadD           | C20    |    |       |            | NoAmplification        |
| aadE           | C20    |    |       |            | NoAmplification        |
| acrA-01        | C20    |    | 32.45 | 88.73      | 1.89                   |
| acrA-02        | C20    |    |       |            | CurveFitFailed         |
| acrA-03        | C20    |    | 35.14 | 86.41      | 1.87                   |
| acrA-04        | C20    |    | 29.49 | 80.7       | 1.96                   |
| acrA-05        | C20    |    | 31.25 | 91.16      | 1.97                   |
| acrB-01        | C20    |    | 33.77 | 77.12      | 2.03                   |
| acrF           | C20    |    | 29.81 | 82.63      | 1.91                   |
| acrR-01        | C20    |    |       |            | CurveFitFailed         |
| acrR-02        | C20    |    | 38.19 | 86.35      | 1.77 MultipleMeltPeaks |
| Actin          | C20    |    | 23.98 | 83.84      | 1.95 MultipleMeltPeaks |
| adeA           | C20    |    | 35.95 | 86.38      | 1.83                   |
| ampC-01        | C20    |    | 33.02 | 88.59      | 1.9                    |
| ampC-02        | C20    |    | 37.71 | 76.74      | 2.02                   |
| ampC-04        | C20    |    | 29.87 | 86.25      | 2                      |
| ampC-05        | C20    |    |       |            | NoAmplification        |
| ampC-06        | C20    |    |       |            | NoAmplification        |
| ampC-07        | C20    |    | 35.66 | 82.63      | 1.81                   |
| ampC-09        | C20    |    |       |            | NoAmplification        |
| ampC/blaDH     | C20    |    | 32.63 | 76.82      | 1.98 MultipleMeltPeaks |

|                            |     |       |       |      |                   |
|----------------------------|-----|-------|-------|------|-------------------|
| aph                        | C20 |       |       |      | NoAmplification   |
| aph(2')-Id-01              | C20 |       |       |      | NoAmplification   |
| aph(2')-Id-02              | C20 |       |       |      | NoAmplification   |
| aph6ia                     | C20 |       |       |      | NoAmplification   |
| aphA1(aka k <sub>2</sub> ) | C20 |       |       |      | NoAmplification   |
| bacA-01                    | C20 |       |       |      | NoAmplification   |
| bacA-02                    | C20 | 37.97 | 83.19 | 1.46 | MultipleMeltPeaks |
| BETA-globin                | C20 | 25.39 | 84.08 | 1.99 |                   |
| bla-ACC-1                  | C20 | 31.62 | 82.64 | 1.95 |                   |
| bla-L1                     | C20 | 34.46 | 86.08 | 1.89 |                   |
| bla1                       | C20 |       |       |      | NoAmplification   |
| blaCMY                     | C20 |       |       |      | NoAmplification   |
| blaCMY2-01                 | C20 |       |       |      | NoAmplification   |
| blaCMY2-02                 | C20 | 30.02 | 84.82 | 1.95 | MultipleMeltPeaks |
| blaCTX-M-01                | C20 |       |       |      | NoAmplification   |
| blaCTX-M-02                | C20 | 34.31 | 79.94 | 1.83 |                   |
| blaCTX-M-03                | C20 | 40.41 | 83.83 | 1.76 | MultipleMeltPeaks |
| blaCTX-M-04                | C20 | 39.01 | 85.78 | 1.69 |                   |
| blaCTX-M-05                | C20 | 31.96 | 76.81 | 1.8  |                   |
| blaCTX-M-06                | C20 | 35.7  | 82.28 | 1.92 |                   |
| blaGES                     | C20 |       |       |      | NoAmplification   |
| blaIMP-01                  | C20 |       |       |      | NoAmplification   |
| blaIMP-02                  | C20 |       |       |      | NoAmplification   |
| blaMOX/blaC                | C20 | 32.17 | 82.41 | 1.98 |                   |
| blaOCH                     | C20 |       |       |      | NoAmplification   |
| blaOKP                     | C20 |       |       |      | NoAmplification   |
| blaOXA1/blaC               | C20 |       |       |      | NoAmplification   |
| blaOXA10-01                | C20 |       |       |      | NoAmplification   |
| blaOXA10-02                | C20 |       |       |      | NoAmplification   |
| blaOXY                     | C20 | 37.13 | 88.55 | 1.66 |                   |
| blaPAO                     | C20 |       |       |      | NoAmplification   |
| blaPER                     | C20 |       |       |      | NoAmplification   |
| blaPSE                     | C20 |       |       |      | NoAmplification   |
| blaROB                     | C20 |       |       |      | NoAmplification   |
| blaSFO                     | C20 | 35.15 | 78.2  | 1.91 | MultipleMeltPeaks |
| blaSHV-01                  | C20 |       |       |      | CurveFitFailed    |
| blaSHV-02                  | C20 |       |       |      | NoAmplification   |
| blaTEM                     | C20 |       |       |      | NoAmplification   |
| blaTLA                     | C20 |       |       |      | NoAmplification   |
| blaVEB                     | C20 |       |       |      | NoAmplification   |
| blaVIM                     | C20 |       |       |      | NoAmplification   |
| blaZ                       | C20 |       |       |      | NoAmplification   |
| carB                       | C20 |       |       |      | CurveFitFailed    |
| catA1                      | C20 |       |       |      | NoAmplification   |
| catB3                      | C20 |       |       |      | NoAmplification   |
| catB8                      | C20 | 30.37 | 83.24 | 1.97 | MultipleMeltPeaks |

|            |     |       |       |      |                              |
|------------|-----|-------|-------|------|------------------------------|
| ceoA       | C20 | 29.98 | 82.29 | 1.92 |                              |
| cepA       | C20 |       |       |      | NoAmplification              |
| cfiA       | C20 | 33.4  | 84.73 | 1.88 | MultipleMeltPeaks            |
| cfr        | C20 |       |       |      | NoAmplification              |
| cfxA       | C20 | 25.48 | 77.61 | 2.05 |                              |
| cmeA       | C20 | 38.61 | 85.08 | 1.77 |                              |
| cmlA1-01   | C20 | 38.85 | 80.87 | 1.75 |                              |
| cmlA1-02   | C20 |       |       |      | NoAmplification              |
| cmr        | C20 |       |       |      | NoAmplification              |
| cmx(A)     | C20 | 29.05 | 87.48 | 1.94 |                              |
| cphA-01    | C20 | 36.31 | 85.48 | 1.82 |                              |
| cphA-02    | C20 | 36.65 | 82.61 | 1.82 |                              |
| dfrA1      | C20 |       |       |      | NoAmplification              |
| dfrA12     | C20 | 39.84 | 85.89 | 1.67 |                              |
| emrD       | C20 |       |       |      | NoAmplification              |
| ereA       | C20 | 43.4  | 83.87 | 1.58 | MultipleMeltPeaks            |
| ereB       | C20 | 43.53 | 62.61 | 1.65 | MultipleMeltPeaks            |
| erm(34)    | C20 |       |       |      | NoAmplification              |
| erm(35)    | C20 |       |       |      | NoAmplification              |
| erm(36)    | C20 |       |       |      | CurveFitFailed               |
| ermA       | C20 |       |       |      | NoAmplification              |
| ermA/ermTR | C20 |       |       |      | NoAmplification              |
| ermB       | C20 |       |       |      | NoAmplification              |
| ermC       | C20 |       |       |      | NoAmplification              |
| ermF       | C20 |       |       |      | NoAmplification              |
| ermJ/ermD  | C20 |       |       |      | NoAmplification              |
| ermK-01    | C20 |       |       |      | NoAmplification              |
| ermK-02    | C20 | 37.62 | 80.86 | 1.76 |                              |
| ermT-01    | C20 |       |       |      | NoAmplification              |
| ermT-02    | C20 |       |       |      | NoAmplification              |
| ermX       | C20 | 38.17 | 85.99 | 1.57 | MultipleMeltPeaks            |
| ermY       | C20 |       |       |      | NoAmplification              |
| fabK       | C20 | 29.83 | 79.09 | 2.06 | MultipleMeltPeaks            |
| floR       | C20 |       |       |      | NoAmplification              |
| folA       | C20 |       |       |      | NoAmplification              |
| fosB       | C20 |       |       |      | LowEfficiency, CtIsSmall, S: |
| fosX       | C20 |       |       |      | NoAmplification              |
| fox5       | C20 | 29.46 | 86.37 | 1.94 |                              |
| imiR       | C20 | 35.47 | 75.1  | 1.92 |                              |
| ImrA-01    | C20 |       |       |      | NoAmplification              |
| intl       | C20 | 30.66 | 84.82 | 1.95 | MultipleMeltPeaks            |
| intl1      | C20 | 23.25 | 87.13 | 2    |                              |
| IS613      | C20 | 37.74 | 78.87 | 1.78 |                              |
| lnuA-01    | C20 |       |       |      | NoAmplification              |
| lnuB-01    | C20 |       |       |      | NoAmplification              |
| lnuB-02    | C20 |       |       |      | NoAmplification              |



|                |     |       |       |      |                           |
|----------------|-----|-------|-------|------|---------------------------|
| lnuC           | C20 | 38.81 | 88.01 | 1.53 |                           |
| marR-01        | C20 |       |       |      | CtIsLarge, CurveFitFailed |
| matA/mel       | C20 | 25.5  | 77.65 | 2.04 |                           |
| mdet1          | C20 |       |       |      | NoAmplification           |
| mdtA           | C20 | 39.4  | 82.28 | 1.61 |                           |
| mdtE/yhiU      | C20 |       |       |      | NoAmplification           |
| mecA           | C20 |       |       |      | NoAmplification           |
| mefA           | C20 | 25.64 | 80.68 | 1.95 |                           |
| mepA           | C20 | 31.37 | 81.34 | 2    |                           |
| mexA           | C20 | 39.25 | 79.52 | 1.79 |                           |
| mexD           | C20 | 34.94 | 79.94 | 1.96 |                           |
| mexE           | C20 |       |       |      | NoAmplification           |
| mexF           | C20 | 31.22 | 89.65 | 2.02 |                           |
| mphA-01        | C20 | 30.6  | 86.12 | 1.91 |                           |
| mphA-02        | C20 | 32.02 | 79.22 | 2.1  | MultipleMeltPeaks         |
| mphB           | C20 |       |       |      | NoAmplification           |
| mphC           | C20 |       |       |      | NoAmplification           |
| msrA-01        | C20 |       |       |      | NoAmplification           |
| msrC-01        | C20 |       |       |      | NoAmplification           |
| mtrC-01        | C20 |       |       |      | NoAmplification           |
| mtrC-02        | C20 | 38.99 | 80.73 | 1.81 | MultipleMeltPeaks         |
| mtrD-02        | C20 | 28.4  | 85.15 | 2.03 |                           |
| mtrD-03        | C20 | 31.88 | 84.01 | 1.89 |                           |
| NDM1           | C20 |       |       |      | CurveFitFailed            |
| nimE           | C20 | 36.88 | 75.09 | 2.22 | BadR2, MultipleMeltPeaks  |
| nisB           | C20 |       |       |      | CurveFitFailed            |
| oleC           | C20 | 38.46 | 88.32 | 1.74 |                           |
| oprD           | C20 | 28.46 | 87.22 | 1.98 |                           |
| oprJ           | C20 | 33.09 | 86.54 | 1.93 |                           |
| pbp            | C20 |       |       |      | NoAmplification           |
| pbp2x          | C20 | 28.85 | 74.95 | 1.94 |                           |
| Pbp5           | C20 |       |       |      | NoAmplification           |
| penA           | C20 |       |       |      | NoAmplification           |
| pikR1          | C20 | 35.92 | 82.37 | 1.8  | MultipleMeltPeaks         |
| pikR2          | C20 | 34.84 | 85.07 | 1.87 |                           |
| pmrA           | C20 | 28.55 | 79.05 | 2.09 |                           |
| pncA           | C20 | 26.37 | 84.76 | 1.92 |                           |
| putative multi | C20 | 30.57 | 84.2  | 1.98 |                           |
| qac            | C20 | 44.53 | 61.9  | 1.53 | MultipleMeltPeaks         |
| qacA           | C20 |       |       |      | NoAmplification           |
| qacA/qacB      | C20 |       |       |      | NoAmplification           |
| qacEdelta1-0   | C20 |       |       |      | NoAmplification           |
| qacEdelta1-0   | C20 | 30.29 | 76.99 | 1.99 |                           |
| qacH-01        | C20 | 32.18 | 86.52 | 1.93 |                           |
| qacH-02        | C20 | 38.03 | 83.67 | 1.68 | MultipleMeltPeaks         |
| qnrA           | C20 | 37.76 | 80.08 | 1.8  |                           |

|              |     |       |       |      |                   |
|--------------|-----|-------|-------|------|-------------------|
| rarD-02      | C20 | 35.25 | 85.83 | 1.89 |                   |
| sat4         | C20 |       |       |      | NoAmplification   |
| sdeB         | C20 |       |       |      | NoAmplification   |
| spcN-01      | C20 |       |       |      | NoAmplification   |
| speA         | C20 |       |       |      | NoAmplification   |
| str          | C20 |       |       |      | NoAmplification   |
| strA         | C20 |       |       |      | NoAmplification   |
| strB         | C20 | 23.63 | 84.1  | 1.95 |                   |
| sul1         | C20 | 38.91 | 89.53 | 1.59 | MultipleMeltPeaks |
| sul2         | C20 |       |       |      | NoAmplification   |
| sulA/foIP-01 | C20 | 25.69 | 81.46 | 1.98 |                   |
| sulA/foIP-03 | C20 | 25.28 | 83.85 | 1.99 |                   |
| tet(32)      | C20 | 28.9  | 81.08 | 1.98 |                   |
| tet(34)      | C20 | 29    | 76.07 | 2.01 |                   |
| tet(35)      | C20 |       |       |      | NoAmplification   |
| tet(36)-A    | C20 |       |       |      | NoAmplification   |
| tet(36)-B    | C20 |       |       |      | NoAmplification   |
| tet(37)      | C20 | 27.79 | 76.51 | 2    |                   |
| tetA-01      | C20 | 29.76 | 85.15 | 1.89 |                   |
| tetA-02      | C20 | 33.32 | 81.5  | 1.94 |                   |
| tetB-01      | C20 | 24.15 | 79.85 | 1.97 |                   |
| tetB-02      | C20 | 23.24 | 79.72 | 2    |                   |
| tetC-01      | C20 | 24.34 | 75.44 | 2    |                   |
| tetC-02      | C20 | 23.99 | 76.12 | 2.04 |                   |
| tetD-01      | C20 |       |       |      | NoAmplification   |
| tetD-02      | C20 |       |       |      | NoAmplification   |
| tetE         | C20 |       |       |      | NoAmplification   |
| tetG-01      | C20 | 35.26 | 89.86 | 1.84 |                   |
| tetG-02      | C20 |       |       |      | CurveFitFailed    |
| tetH         | C20 |       |       |      | NoAmplification   |
| tetJ         | C20 | 41.35 | 76.28 | 1.73 | MultipleMeltPeaks |
| tetK         | C20 |       |       |      | NoAmplification   |
| tetL-01      | C20 |       |       |      | NoAmplification   |
| tetL-02      | C20 | 33.47 | 85.25 | 1.8  |                   |
| tetM-01      | C20 | 24.38 | 76.31 | 2    |                   |
| tetM-02      | C20 | 25.29 | 77.7  | 2.03 |                   |
| tetO-01      | C20 |       |       |      | NoAmplification   |
| tetPA        | C20 |       |       |      | NoAmplification   |
| tetPB-01     | C20 |       |       |      | NoAmplification   |
| tetPB-02     | C20 | 31.53 | 84.81 | 2.03 |                   |
| tetPB-03     | C20 |       |       |      | NoAmplification   |
| tetPB-05     | C20 |       |       |      | NoAmplification   |
| tetQ         | C20 | 25.74 | 76.81 | 2.06 |                   |
| tetR-02      | C20 | 39.35 | 78.46 | 1.76 | MultipleMeltPeaks |
| tetR-03      | C20 | 24.2  | 76.26 | 1.98 |                   |
| tetS         | C20 | 27.42 | 73.73 | 2.17 |                   |

|             |     |       |       |      |                   |
|-------------|-----|-------|-------|------|-------------------|
| tetT        | C20 |       |       |      | NoAmplification   |
| tetU-01     | C20 |       |       |      | NoAmplification   |
| tetV        | C20 |       |       |      | NoAmplification   |
| tetW-01     | C20 |       |       |      | NoAmplification   |
| tetX        | C20 |       |       |      | NoAmplification   |
| tnpA-01     | C20 | 38.45 | 79.61 | 1.93 |                   |
| tnpA-02     | C20 | 38.7  | 84.57 | 1.6  |                   |
| tnpA-03     | C20 | 35.25 | 74.41 | 2.11 |                   |
| tnpA-04     | C20 |       |       |      | NoAmplification   |
| tnpA-05     | C20 | 35.7  | 76.13 | 1.87 |                   |
| tnpA-07     | C20 |       |       |      | NoAmplification   |
| tolC-01     | C20 | 38.48 | 61.65 | 1.82 | MultipleMeltPeaks |
| tolC-02     | C20 | 31.81 | 83.61 | 1.96 |                   |
| tolC-03     | C20 | 34.29 | 85.24 | 1.91 |                   |
| Tp614       | C20 |       |       |      | NoAmplification   |
| ttgA        | C20 |       |       |      | NoAmplification   |
| ttgB        | C20 | 35.9  | 79.42 | 1.89 |                   |
| vanA        | C20 |       |       |      | NoAmplification   |
| vanB-01     | C20 |       |       |      | CurveFitFailed    |
| vanC-01     | C20 |       |       |      | NoAmplification   |
| vanC-02     | C20 |       |       |      | NoAmplification   |
| vanC-03     | C20 | 33.7  | 84.42 | 1.88 |                   |
| vanC1       | C20 |       |       |      | NoAmplification   |
| vanC2/vanC3 | C20 |       |       |      | CurveFitFailed    |
| vanG        | C20 |       |       |      | NoAmplification   |
| vanHB       | C20 |       |       |      | NoAmplification   |
| vanHD       | C20 |       |       |      | NoAmplification   |
| vanRA-01    | C20 |       |       |      | NoAmplification   |
| vanRA-02    | C20 |       |       |      | NoAmplification   |
| vanRB       | C20 | 32.59 | 87.52 | 1.91 |                   |
| vanRC       | C20 |       |       |      | NoAmplification   |
| vanRC4      | C20 |       |       |      | NoAmplification   |
| vanRD       | C20 |       |       |      | NoAmplification   |
| vanSA       | C20 |       |       |      | NoAmplification   |
| vanSB       | C20 | 29.8  | 74.67 | 2.07 |                   |
| vanSC-01    | C20 |       |       |      | CurveFitFailed    |
| vanSC-02    | C20 |       |       |      | NoAmplification   |
| vanTC-01    | C20 |       |       |      | NoAmplification   |
| vanTC-02    | C20 |       |       |      | CurveFitFailed    |
| vanTE       | C20 |       |       |      | CurveFitFailed    |
| vanTG       | C20 | 40.24 | 73.54 | 1.79 |                   |
| vanWB       | C20 |       |       |      | NoAmplification   |
| vanWG       | C20 | 38.4  | 74.3  | 1.94 |                   |
| vanXA       | C20 | 37.52 | 77.16 | 1.81 |                   |
| vanXB       | C20 |       |       |      | NoAmplification   |
| vanXD       | C20 | 30.9  | 75.73 | 2.02 |                   |

|              |     |       |       |      |                   |
|--------------|-----|-------|-------|------|-------------------|
| vanYB        | C20 |       |       |      | NoAmplification   |
| vanYD-01     | C20 | 33.54 | 81.53 | 1.83 |                   |
| vanYD-02     | C20 |       |       |      | NoAmplification   |
| vatB-01      | C20 |       |       |      | NoAmplification   |
| vatB-02      | C20 |       |       |      | NoAmplification   |
| vatC-01      | C20 |       |       |      | CurveFitFailed    |
| vatC-02      | C20 | 35.7  | 83.23 | 1.84 |                   |
| vatE-01      | C20 | 29.43 | 76.92 | 2.12 |                   |
| vatE-02      | C20 |       |       |      | NoAmplification   |
| vgaA-01      | C20 |       |       |      | NoAmplification   |
| vgaA-02      | C20 |       |       |      | CurveFitFailed    |
| vgb-01       | C20 | 38.7  | 85.39 | 1.73 | MultipleMeltPeaks |
| vgbB-01      | C20 |       |       |      | NoAmplification   |
| vgbB-02      | C20 |       |       |      | NoAmplification   |
| yceE/mdtG-0  | C20 |       |       |      | NoAmplification   |
| yceE/mdtG-0  | C20 |       |       |      | NoAmplification   |
| yceL/mdtH-0  | C20 | 35.34 | 85.24 | 1.83 |                   |
| yceL/mdtH-0  | C20 |       |       |      | NoAmplification   |
| yceL/mdtH-0  | C20 | 37.52 | 77.84 | 1.86 |                   |
| yidY/mdtL-01 | C20 | 32.68 | 84.8  | 1.94 |                   |
| yidY/mdtL-02 | C20 |       |       |      | NoAmplification   |

| Assay          | Sample | Ct | Tm    | Efficiency | Flags                     |
|----------------|--------|----|-------|------------|---------------------------|
| 16S rRNA       | C21    |    | 18.04 | 82.12      | 2.02                      |
| aac            | C21    |    | 31.7  | 80.73      | 1.53 MultipleMeltPeaks    |
| aac(6')-Ib(akz | C21    |    | 39.11 | 83.37      | 1.8                       |
| aac(6')-Ib(akz | C21    |    | 34.21 | 82.71      | 1.93 MultipleMeltPeaks    |
| aac(6')-Ib(akz | C21    |    | 32.17 | 84.44      | 1.99                      |
| aac(6')-II     | C21    |    | 34.23 | 83.98      | 1.8 MultipleMeltPeaks     |
| aac(6')I1      | C21    |    | 41.34 | 62.62      | 1.7 MultipleMeltPeaks     |
| aacA/aphD      | C21    |    |       |            | NoAmplification           |
| aacC           | C21    |    | 29.1  | 91.84      | 1.88                      |
| aacC1          | C21    |    |       |            | NoAmplification           |
| aacC2          | C21    |    |       |            | NoAmplification           |
| aacC4          | C21    |    | 30.58 | 89.51      | 1.93 MultipleMeltPeaks    |
| aadA-01        | C21    |    |       |            | NoAmplification           |
| aadA-02        | C21    |    | 33.42 | 80.42      | 1.95                      |
| aadA-1-01      | C21    |    | 35.82 | 82.1       | 1.9 MultipleMeltPeaks     |
| aadA-1-02      | C21    |    |       |            | NoAmplification           |
| aadA1          | C21    |    | 34.44 | 84.33      | 1.93                      |
| aadA2-01       | C21    |    | 40.72 | 83.95      | 1.72 MultipleMeltPeaks    |
| aadA2-02       | C21    |    | 32.25 | 75.49      | 2.03                      |
| aadA2-03       | C21    |    | 39.96 | 81.93      | 1.76 MultipleMeltPeaks    |
| aadA5-01       | C21    |    | 37.76 | 88.59      | 1.73 MultipleMeltPeaks    |
| aadA5-02       | C21    |    | 31.14 | 83.32      | 2.01 MultipleMeltPeaks    |
| aadA9-01       | C21    |    | 39    | 85.91      | 1.61 MultipleMeltPeaks    |
| aadA9-02       | C21    |    |       |            | CurveFitFailed            |
| aadD           | C21    |    |       |            | NoAmplification           |
| aadE           | C21    |    |       |            | NoAmplification           |
| acrA-01        | C21    |    | 33.15 | 88.69      | 1.93                      |
| acrA-02        | C21    |    | 32.3  | 89.58      | 1.94                      |
| acrA-03        | C21    |    | 34.25 | 88.48      | 1.85                      |
| acrA-04        | C21    |    | 28.79 | 80.66      | 1.97                      |
| acrA-05        | C21    |    | 31.58 | 88.85      | 1.9                       |
| acrB-01        | C21    |    |       |            | NoAmplification           |
| acrF           | C21    |    | 28.28 | 86.03      | 1.82 MultipleMeltPeaks    |
| acrR-01        | C21    |    | 38.86 | 61.63      | 1.75 MultipleMeltPeaks    |
| acrR-02        | C21    |    | 43.7  | 86.48      | 1.65 MultipleMeltPeaks    |
| Actin          | C21    |    | 22.69 | 87.13      | 1.96                      |
| adeA           | C21    |    | 37.72 | 85.54      | 1.73                      |
| ampC-01        | C21    |    | 31.86 | 80.51      | 2.03                      |
| ampC-02        | C21    |    | 36.74 | 61.55      | 2.7 MultipleMeltPeaks     |
| ampC-04        | C21    |    | 30.38 | 85.61      | 1.69                      |
| ampC-05        | C21    |    |       |            | NoAmplification           |
| ampC-06        | C21    |    |       |            | CtIsLarge, CurveFitFailed |
| ampC-07        | C21    |    | 32.39 | 86.41      | 1.88                      |
| ampC-09        | C21    |    | 37.28 | 85.56      | 1.76                      |
| ampC/blaDH     | C21    |    | 30.2  | 81.61      | 1.97 MultipleMeltPeaks    |

|                          |     |       |       |      |                       |
|--------------------------|-----|-------|-------|------|-----------------------|
| aph                      | C21 |       |       |      | NoAmplification       |
| aph(2')-Id-01            | C21 |       |       |      | NoAmplification       |
| aph(2')-Id-02            | C21 |       |       |      | NoAmplification       |
| aph6ia                   | C21 | 36.99 | 79.1  | 1.92 |                       |
| aphA1(aka k <sub>z</sub> | C21 |       |       |      | NoAmplification       |
| bacA-01                  | C21 |       |       |      | NoAmplification       |
| bacA-02                  | C21 | 35.27 | 83.4  | 1.7  | MultipleMeltPeaks     |
| BETA-globin              | C21 | 23.47 | 84.06 | 1.99 |                       |
| bla-ACC-1                | C21 | 33.04 | 85.99 | 1.92 |                       |
| bla-L1                   | C21 | 30.01 | 85.87 | 1.97 |                       |
| bla1                     | C21 |       |       |      | NoAmplification       |
| blaCMY                   | C21 | 37.82 | 74.73 | 1.85 | MultipleMeltPeaks     |
| blaCMY2-01               | C21 |       |       |      | NoAmplification       |
| blaCMY2-02               | C21 | 28.92 | 84.27 | 1.96 | MultipleMeltPeaks     |
| blaCTX-M-01              | C21 |       |       |      | NoAmplification       |
| blaCTX-M-02              | C21 | 33.97 | 83.23 | 1.85 |                       |
| blaCTX-M-03              | C21 |       |       |      | NoAmplification       |
| blaCTX-M-04              | C21 | 34.38 | 84.72 | 1.79 | MultipleMeltPeaks     |
| blaCTX-M-05              | C21 |       |       |      | CurveFitFailed        |
| blaCTX-M-06              | C21 |       |       |      | NoAmplification       |
| blaGES                   | C21 |       |       |      | NoAmplification       |
| blaIMP-01                | C21 |       |       |      | NoAmplification       |
| blaIMP-02                | C21 |       |       |      | CurveFitFailed        |
| blaMOX/blaC              | C21 |       |       |      | NoAmplification       |
| blaOCH                   | C21 | 31.73 | 89.86 | 2.06 |                       |
| blaOKP                   | C21 |       |       |      | NoAmplification       |
| blaOXA1/blaC             | C21 |       |       |      | NoAmplification       |
| blaOXA10-01              | C21 |       |       |      | NoAmplification       |
| blaOXA10-02              | C21 |       |       |      | NoAmplification       |
| blaOXY                   | C21 | 33.51 | 89.51 | 1.83 |                       |
| blaPAO                   | C21 |       |       |      | NoAmplification       |
| blaPER                   | C21 |       |       |      | CurveFitFailed        |
| blaPSE                   | C21 |       |       |      | NoAmplification       |
| blaROB                   | C21 |       |       |      | NoAmplification       |
| blaSFO                   | C21 | 32.56 | 86.28 | 1.94 |                       |
| blaSHV-01                | C21 |       |       |      | CurveFitFailed        |
| blaSHV-02                | C21 |       |       |      | NoAmplification       |
| blaTEM                   | C21 |       |       |      | NoAmplification       |
| blaTLA                   | C21 |       |       |      | NoAmplification       |
| blaVEB                   | C21 |       |       |      | NoAmplification       |
| blaVIM                   | C21 |       |       |      | NoAmplification       |
| blaZ                     | C21 |       |       |      | NoAmplification       |
| carB                     | C21 |       |       |      | BadR2, CurveFitFailed |
| catA1                    | C21 |       |       |      | NoAmplification       |
| catB3                    | C21 | 38.01 | 79.94 | 1.81 | MultipleMeltPeaks     |
| catB8                    | C21 | 29.04 | 84.78 | 1.96 | MultipleMeltPeaks     |

|            |     |       |       |      |                   |
|------------|-----|-------|-------|------|-------------------|
| ceoA       | C21 | 32.92 | 82.34 | 1.9  | MultipleMeltPeaks |
| cepA       | C21 |       |       |      | NoAmplification   |
| cfiA       | C21 | 34.9  | 87.06 | 1.96 |                   |
| cfr        | C21 |       |       |      | NoAmplification   |
| cfxA       | C21 | 23.25 | 77.69 | 2.1  |                   |
| cmeA       | C21 | 38.16 | 85.06 | 1.83 |                   |
| cmlA1-01   | C21 | 39.94 | 88.33 | 1.71 | MultipleMeltPeaks |
| cmlA1-02   | C21 | 34.13 | 89.36 | 1.79 |                   |
| cmr        | C21 | 30.63 | 78.72 | 1.95 |                   |
| cmx(A)     | C21 | 26.45 | 84.65 | 1.95 | MultipleMeltPeaks |
| cphA-01    | C21 | 32.41 | 81.74 | 1.92 | MultipleMeltPeaks |
| cphA-02    | C21 | 35.84 | 82.64 | 1.86 | MultipleMeltPeaks |
| dfrA1      | C21 |       |       |      | NoAmplification   |
| dfrA12     | C21 | 40.3  | 78.24 | 1.65 | MultipleMeltPeaks |
| emrD       | C21 |       |       |      | CurveFitFailed    |
| ereA       | C21 | 35.59 | 82.59 | 1.89 |                   |
| ereB       | C21 | 37.26 | 75.44 | 1.77 | MultipleMeltPeaks |
| erm(34)    | C21 |       |       |      | CurveFitFailed    |
| erm(35)    | C21 |       |       |      | NoAmplification   |
| erm(36)    | C21 | 33.97 | 87.93 | 2.11 | MultipleMeltPeaks |
| ermA       | C21 |       |       |      | NoAmplification   |
| ermA/ermTR | C21 |       |       |      | NoAmplification   |
| ermB       | C21 | 24.51 | 75.16 | 2.1  |                   |
| ermC       | C21 |       |       |      | CurveFitFailed    |
| ermF       | C21 |       |       |      | NoAmplification   |
| ermJ/ermD  | C21 |       |       |      | NoAmplification   |
| ermK-01    | C21 | 32.52 | 75.25 | 2.05 |                   |
| ermK-02    | C21 |       |       |      | CurveFitFailed    |
| ermT-01    | C21 |       |       |      | NoAmplification   |
| ermT-02    | C21 | 39.69 | 79.98 | 1.79 | MultipleMeltPeaks |
| ermX       | C21 | 35.85 | 87.36 | 1.71 |                   |
| ermY       | C21 |       |       |      | NoAmplification   |
| fabK       | C21 | 26.96 | 79.16 | 2.08 | MultipleMeltPeaks |
| floR       | C21 |       |       |      | NoAmplification   |
| folA       | C21 |       |       |      | NoAmplification   |
| fosB       | C21 |       |       |      | CurveFitFailed    |
| fosX       | C21 |       |       |      | NoAmplification   |
| fox5       | C21 | 27.54 | 86.39 | 1.97 |                   |
| imiR       | C21 |       |       |      | NoAmplification   |
| lmrA-01    | C21 |       |       |      | NoAmplification   |
| intl       | C21 | 30.48 | 84.92 | 1.96 | MultipleMeltPeaks |
| intl1      | C21 | 22.44 | 87.23 | 1.99 |                   |
| IS613      | C21 | 24.24 | 79.97 | 2.06 |                   |
| lnuA-01    | C21 |       |       |      | NoAmplification   |
| lnuB-01    | C21 |       |       |      | NoAmplification   |
| lnuB-02    | C21 |       |       |      | NoAmplification   |

|               |     |       |       |      |                          |
|---------------|-----|-------|-------|------|--------------------------|
| lnuC          | C21 | 35.27 | 84.95 | 1.78 | MultipleMeltPeaks        |
| marR-01       | C21 | 36.27 | 86.8  | 1.82 |                          |
| matA/mel      | C21 | 21.91 | 77.77 | 2.07 |                          |
| mdet1         | C21 |       |       |      | NoAmplification          |
| mdtA          | C21 | 39.32 | 82.27 | 1.61 |                          |
| mdtE/yhiU     | C21 |       |       |      | NoAmplification          |
| mecA          | C21 |       |       |      | NoAmplification          |
| mefA          | C21 | 21.15 | 80.51 | 1.98 |                          |
| mepA          | C21 | 35    | 88.1  | 1.85 |                          |
| mexA          | C21 |       |       |      | NoAmplification          |
| mexD          | C21 | 36.46 | 79.84 | 1.89 |                          |
| mexE          | C21 | 34.45 | 87.58 | 1.89 |                          |
| mexF          | C21 | 28.31 | 90    | 2.05 |                          |
| mphA-01       | C21 | 30.51 | 89.19 | 1.99 |                          |
| mphA-02       | C21 | 31.08 | 89.04 | 1.35 |                          |
| mphB          | C21 |       |       |      | NoAmplification          |
| mphC          | C21 |       |       |      | CurveFitFailed           |
| msrA-01       | C21 |       |       |      | NoAmplification          |
| msrC-01       | C21 |       |       |      | NoAmplification          |
| mtrC-01       | C21 |       |       |      | NoAmplification          |
| mtrC-02       | C21 | 34.59 | 83.56 | 1.94 | MultipleMeltPeaks        |
| mtrD-02       | C21 | 28.28 | 82.67 | 1.98 |                          |
| mtrD-03       | C21 | 29.55 | 82.44 | 1.92 |                          |
| NDM1          | C21 |       |       |      | CurveFitFailed           |
| nimE          | C21 | 39.46 | 83.12 | 1.81 |                          |
| nisB          | C21 |       |       |      | NoAmplification          |
| oleC          | C21 |       |       |      | NoAmplification          |
| oprD          | C21 | 28.49 | 86.67 | 1.98 |                          |
| oprJ          | C21 | 31.22 | 89.47 | 1.91 |                          |
| pbp           | C21 | 39.14 | 81.45 | 1.69 | BadR2, MultipleMeltPeaks |
| pbp2x         | C21 |       |       |      | NoAmplification          |
| Pbp5          | C21 |       |       |      | NoAmplification          |
| penA          | C21 |       |       |      | NoAmplification          |
| pikR1         | C21 |       |       |      | CurveFitFailed           |
| pikR2         | C21 | 32.23 | 84.79 | 2.04 |                          |
| pmrA          | C21 |       |       |      | CurveFitFailed           |
| pncA          | C21 | 25.23 | 89.12 | 1.92 |                          |
| putative mult | C21 | 32.34 | 84.2  | 1.99 |                          |
| qac           | C21 | 36.64 | 82.76 | 1.86 | MultipleMeltPeaks        |
| qacA          | C21 |       |       |      | NoAmplification          |
| qacA/qacB     | C21 |       |       |      | NoAmplification          |
| qacEdelta1-0  | C21 |       |       |      | NoAmplification          |
| qacEdelta1-0  | C21 | 33.36 | 81.34 | 1.92 | MultipleMeltPeaks        |
| qacH-01       | C21 | 30.04 | 86.87 | 1.91 | MultipleMeltPeaks        |
| qacH-02       | C21 | 34.97 | 83.79 | 1.78 |                          |
| qnrA          | C21 |       |       |      | NoAmplification          |



|              |     |       |       |      |                              |
|--------------|-----|-------|-------|------|------------------------------|
| rarD-02      | C21 | 38.79 | 90.18 | 1.69 |                              |
| sat4         | C21 |       |       |      | NoAmplification              |
| sdeB         | C21 |       |       |      | NoAmplification              |
| spcN-01      | C21 |       |       |      | NoAmplification              |
| speA         | C21 |       |       |      | NoAmplification              |
| str          | C21 |       |       |      | NoAmplification              |
| strA         | C21 |       |       |      | NoAmplification              |
| strB         | C21 | 39.58 | 83.58 | 1.66 | MultipleMeltPeaks            |
| sul1         | C21 | 37.93 | 88.55 | 1.59 |                              |
| sul2         | C21 |       |       |      | LowEfficiency, CtIsSmall, S: |
| sulA/foIP-01 | C21 | 24.71 | 81.24 | 1.98 |                              |
| sulA/foIP-03 | C21 | 25.37 | 83.08 | 1.97 |                              |
| tet(32)      | C21 |       |       |      | NoAmplification              |
| tet(34)      | C21 | 30.52 | 75.87 | 2    |                              |
| tet(35)      | C21 |       |       |      | NoAmplification              |
| tet(36)-A    | C21 |       |       |      | NoAmplification              |
| tet(36)-B    | C21 |       |       |      | NoAmplification              |
| tet(37)      | C21 | 32.02 | 77.57 | 1.95 | MultipleMeltPeaks            |
| tetA-01      | C21 | 34.17 | 85.05 | 1.92 |                              |
| tetA-02      | C21 |       |       |      | CurveFitFailed               |
| tetB-01      | C21 | 28.81 | 79.14 | 1.97 | MultipleMeltPeaks            |
| tetB-02      | C21 | 38.37 | 74.51 | 1.82 |                              |
| tetC-01      | C21 |       |       |      | NoAmplification              |
| tetC-02      | C21 |       |       |      | NoAmplification              |
| tetD-01      | C21 |       |       |      | NoAmplification              |
| tetD-02      | C21 |       |       |      | NoAmplification              |
| tetE         | C21 | 38.11 | 84.36 | 1.85 |                              |
| tetG-01      | C21 | 35.56 | 82.52 | 1.86 |                              |
| tetG-02      | C21 | 30.59 | 87.25 | 1.94 |                              |
| tetH         | C21 |       |       |      | NoAmplification              |
| tetJ         | C21 |       |       |      | CurveFitFailed               |
| tetK         | C21 |       |       |      | NoAmplification              |
| tetL-01      | C21 |       |       |      | NoAmplification              |
| tetL-02      | C21 | 31.09 | 85.24 | 1.84 |                              |
| tetM-01      | C21 | 22.95 | 76.35 | 2    |                              |
| tetM-02      | C21 | 22.99 | 77.69 | 2.01 |                              |
| tetO-01      | C21 |       |       |      | NoAmplification              |
| tetPA        | C21 |       |       |      | NoAmplification              |
| tetPB-01     | C21 |       |       |      | NoAmplification              |
| tetPB-02     | C21 | 29.63 | 84.83 | 2.03 |                              |
| tetPB-03     | C21 |       |       |      | NoAmplification              |
| tetPB-05     | C21 |       |       |      | NoAmplification              |
| tetQ         | C21 | 29.15 | 76.71 | 1.99 |                              |
| tetR-02      | C21 | 35.5  | 86    | 1.8  | MultipleMeltPeaks            |
| tetR-03      | C21 |       |       |      | NoAmplification              |
| tetS         | C21 | 37.71 | 79.19 | 2.06 | MultipleMeltPeaks            |

|             |     |       |       |      |                             |
|-------------|-----|-------|-------|------|-----------------------------|
| tetT        | C21 |       |       |      | NoAmplification             |
| tetU-01     | C21 |       |       |      | NoAmplification             |
| tetV        | C21 |       |       |      | NoAmplification             |
| tetW-01     | C21 |       |       |      | BadR2, LowEfficiency, CtlS  |
| tetX        | C21 |       |       |      | NoAmplification             |
| tnpA-01     | C21 |       |       |      | CurveFitFailed              |
| tnpA-02     | C21 | 32.77 | 85.75 | 1.77 |                             |
| tnpA-03     | C21 | 39.87 | 73.83 | 1.85 |                             |
| tnpA-04     | C21 | 43.79 | 78.69 | 1.71 |                             |
| tnpA-05     | C21 | 32.26 | 75.99 | 1.96 |                             |
| tnpA-07     | C21 |       |       |      | NoAmplification             |
| tolC-01     | C21 |       |       |      | CurveFitFailed              |
| tolC-02     | C21 | 30.15 | 84.11 | 1.92 | MultipleMeltPeaks           |
| tolC-03     | C21 | 30.49 | 84.72 | 1.96 |                             |
| Tp614       | C21 | 37.62 | 73.97 | 1.8  |                             |
| ttgA        | C21 | 34.55 | 77.45 | 1.9  | MultipleMeltPeaks           |
| ttgB        | C21 | 39.14 | 76.01 | 1.8  |                             |
| vanA        | C21 |       |       |      | NoAmplification             |
| vanB-01     | C21 | 34.13 | 84.6  | 1.95 |                             |
| vanC-01     | C21 |       |       |      | NoAmplification             |
| vanC-02     | C21 |       |       |      | NoAmplification             |
| vanC-03     | C21 | 29.86 | 85.04 | 1.89 |                             |
| vanC1       | C21 |       |       |      | NoAmplification             |
| vanC2/vanC3 | C21 | 39.23 | 85.8  | 1.69 | MultipleMeltPeaks           |
| vanG        | C21 |       |       |      | NoAmplification             |
| vanHB       | C21 | 35.7  | 82.79 | 1.91 |                             |
| vanHD       | C21 |       |       |      | NoAmplification             |
| vanRA-01    | C21 |       |       |      | NoAmplification             |
| vanRA-02    | C21 |       |       |      | NoAmplification             |
| vanRB       | C21 | 31.39 | 85.55 | 1.95 |                             |
| vanRC       | C21 |       |       |      | NoAmplification             |
| vanRC4      | C21 |       |       |      | CurveFitFailed              |
| vanRD       | C21 |       |       |      | NoAmplification             |
| vanSA       | C21 |       |       |      | NoAmplification             |
| vanSB       | C21 | 31.09 | 74.57 | 2.06 |                             |
| vanSC-01    | C21 | 36.1  | 84.06 | 1.86 |                             |
| vanSC-02    | C21 | 34.43 | 75.64 | 1.95 |                             |
| vanTC-01    | C21 |       |       |      | NoAmplification             |
| vanTC-02    | C21 |       |       |      | NoAmplification             |
| vanTE       | C21 |       |       |      | CurveFitFailed              |
| vanTG       | C21 | 37.69 | 73.87 | 2.06 | MultipleMeltPeaks           |
| vanWB       | C21 |       |       |      | BadR2, CtlSSmall, Saturatio |
| vanWG       | C21 | 38.95 | 74.34 | 1.89 |                             |
| vanXA       | C21 |       |       |      | CurveFitFailed              |
| vanXB       | C21 |       |       |      | NoAmplification             |
| vanXD       | C21 |       |       |      | NoAmplification             |

|              |     |       |       |                        |
|--------------|-----|-------|-------|------------------------|
| vanYB        | C21 |       |       | NoAmplification        |
| vanYD-01     | C21 | 31.56 | 82.73 | 1.8                    |
| vanYD-02     | C21 | 39.18 | 62    | 1.84 MultipleMeltPeaks |
| vatB-01      | C21 |       |       | CurveFitFailed         |
| vatB-02      | C21 | 41.41 | 81.1  | 1.75 MultipleMeltPeaks |
| vatC-01      | C21 |       |       | NoAmplification        |
| vatC-02      | C21 | 35.51 | 86.16 | 1.82                   |
| vatE-01      | C21 | 29.44 | 77.21 | 2.09                   |
| vatE-02      | C21 |       |       | NoAmplification        |
| vgaA-01      | C21 |       |       | NoAmplification        |
| vgaA-02      | C21 |       |       | CurveFitFailed         |
| vgb-01       | C21 | 41.06 | 61.22 | 1.72 MultipleMeltPeaks |
| vgbB-01      | C21 |       |       | CurveFitFailed         |
| vgbB-02      | C21 |       |       | NoAmplification        |
| yceE/mdtG-0  | C21 | 37.35 | 81.24 | 1.76                   |
| yceE/mdtG-0  | C21 |       |       | NoAmplification        |
| yceL/mdtH-0  | C21 | 29.34 | 76.33 | 1.97 MultipleMeltPeaks |
| yceL/mdtH-0  | C21 |       |       | NoAmplification        |
| yceL/mdtH-0  | C21 | 40.53 | 67.16 | 1.65 MultipleMeltPeaks |
| yidY/mdtL-01 | C21 | 31.21 | 82.73 | 1.98                   |
| yidY/mdtL-02 | C21 |       |       | NoAmplification        |

| Assay          | Sample | Ct | Tm    | Efficiency | Flags                       |
|----------------|--------|----|-------|------------|-----------------------------|
| 16S rRNA       | C22    |    | 17.54 | 82.24      | 1.99                        |
| aac            | C22    |    | 31.19 | 81.47      | 1.79 MultipleMeltPeaks      |
| aac(6')-Ib(akz | C22    |    |       |            | LowEfficiency, CtIsSmall, C |
| aac(6')-Ib(akz | C22    |    | 30.63 | 86.01      | 1.99                        |
| aac(6')-Ib(akz | C22    |    | 33.26 | 81.11      | 1.96 MultipleMeltPeaks      |
| aac(6')-II     | C22    |    | 33.98 | 83.38      | 1.74 MultipleMeltPeaks      |
| aac(6')I1      | C22    |    | 37.81 | 88.57      | 1.78                        |
| aacA/aphD      | C22    |    |       |            | LowEfficiency, CtIsSmall, S |
| aacC           | C22    |    | 31.46 | 91.84      | 1.9 MultipleMeltPeaks       |
| aacC1          | C22    |    |       |            | NoAmplification             |
| aacC2          | C22    |    | 33.39 | 83.24      | 1.92                        |
| aacC4          | C22    |    | 33.27 | 89.51      | 1.89                        |
| aadA-01        | C22    |    | 32.92 | 79.17      | 1.9 MultipleMeltPeaks       |
| aadA-02        | C22    |    | 40.07 | 80.58      | 1.69 MultipleMeltPeaks      |
| aadA-1-01      | C22    |    | 34.24 | 85.55      | 1.98                        |
| aadA-1-02      | C22    |    |       |            | NoAmplification             |
| aadA1          | C22    |    | 33.28 | 83.39      | 2.01                        |
| aadA2-01       | C22    |    | 37.44 | 78.62      | 1.77                        |
| aadA2-02       | C22    |    | 31.14 | 75.55      | 2.01                        |
| aadA2-03       | C22    |    |       |            | NoAmplification             |
| aadA5-01       | C22    |    | 37.19 | 78.51      | 1.82 MultipleMeltPeaks      |
| aadA5-02       | C22    |    | 30.26 | 86.47      | 1.92                        |
| aadA9-01       | C22    |    | 31.4  | 89.42      | 1.94 MultipleMeltPeaks      |
| aadA9-02       | C22    |    |       |            | LowEfficiency, CtIsSmall, S |
| aadD           | C22    |    |       |            | NoAmplification             |
| aadE           | C22    |    |       |            | NoAmplification             |
| acrA-01        | C22    |    | 29.57 | 88.81      | 1.96                        |
| acrA-02        | C22    |    |       |            | CtIsLarge, CurveFitFailed   |
| acrA-03        | C22    |    | 35.2  | 88.56      | 1.83                        |
| acrA-04        | C22    |    | 27.89 | 88.53      | 1.96 MultipleMeltPeaks      |
| acrA-05        | C22    |    | 29.31 | 88.1       | 1.94 MultipleMeltPeaks      |
| acrB-01        | C22    |    | 31.64 | 77.56      | 1.99                        |
| acrF           | C22    |    | 30.36 | 83.99      | 1.99                        |
| acrR-01        | C22    |    | 33.23 | 81.17      | 1.93                        |
| acrR-02        | C22    |    | 33.93 | 83.3       | 1.91 MultipleMeltPeaks      |
| Actin          | C22    |    | 21.13 | 86.86      | 1.95                        |
| adeA           | C22    |    | 34.22 | 78.1       | 1.94 MultipleMeltPeaks      |
| ampC-01        | C22    |    | 28.7  | 81.52      | 1.98                        |
| ampC-02        | C22    |    |       |            | CurveFitFailed              |
| ampC-04        | C22    |    | 31.99 | 78.82      | 1.69                        |
| ampC-05        | C22    |    |       |            | NoAmplification             |
| ampC-06        | C22    |    | 30.49 | 84.07      | 1.96                        |
| ampC-07        | C22    |    | 32.84 | 82.43      | 1.9 MultipleMeltPeaks       |
| ampC-09        | C22    |    |       |            | CurveFitFailed              |
| ampC/blaDH     | C22    |    | 29.37 | 84.07      | 1.94                        |

|               |     |       |       |      |                              |
|---------------|-----|-------|-------|------|------------------------------|
| aph           | C22 |       |       |      | LowEfficiency, CtIsSmall, Ci |
| aph(2')-Id-01 | C22 |       |       |      | LowEfficiency, CtIsSmall, S  |
| aph(2')-Id-02 | C22 |       |       |      | LowEfficiency, CtIsSmall, Ci |
| aph6ia        | C22 | 34.15 | 77.78 | 1.92 | MultipleMeltPeaks            |
| aphA1(aka k   | C22 |       |       |      | CurveFitFailed               |
| bacA-01       | C22 |       |       |      | NoAmplification              |
| bacA-02       | C22 | 30.6  | 83.43 | 1.81 |                              |
| BETA-globin   | C22 | 22.6  | 84.07 | 1.99 |                              |
| bla-ACC-1     | C22 | 38.13 | 79.84 | 1.69 |                              |
| bla-L1        | C22 | 29.76 | 84.21 | 1.99 |                              |
| bla1          | C22 |       |       |      | LowEfficiency, CtIsSmall, Ci |
| blaCMY        | C22 | 43.94 | 74.79 | 1.66 | MultipleMeltPeaks            |
| blaCMY2-01    | C22 | 35.58 | 79.88 | 1.91 |                              |
| blaCMY2-02    | C22 | 27.48 | 89.44 | 2    | MultipleMeltPeaks            |
| blaCTX-M-01   | C22 | 38.01 | 76.28 | 1.69 | MultipleMeltPeaks            |
| blaCTX-M-02   | C22 | 35.7  | 79.85 | 1.76 | MultipleMeltPeaks            |
| blaCTX-M-03   | C22 |       |       |      | LowEfficiency, CtIsSmall, Ci |
| blaCTX-M-04   | C22 | 29.53 | 90.21 | 2.03 |                              |
| blaCTX-M-05   | C22 | 32.39 | 76.03 | 1.79 |                              |
| blaCTX-M-06   | C22 |       |       |      | NoAmplification              |
| blaGES        | C22 | 40.53 | 84.28 | 1.84 | MultipleMeltPeaks            |
| blaIMP-01     | C22 |       |       |      | NoAmplification              |
| blaIMP-02     | C22 |       |       |      | LowEfficiency, CtIsSmall, S  |
| blaMOX/blaC   | C22 | 37.39 | 82.32 | 1.82 |                              |
| blaOCH        | C22 | 31.58 | 89.61 | 2.01 | MultipleMeltPeaks            |
| blaOKP        | C22 |       |       |      | NoAmplification              |
| blaOXA1/blaC  | C22 |       |       |      | LowEfficiency, CtIsSmall, Ci |
| blaOXA10-01   | C22 |       |       |      | LowEfficiency, CtIsSmall, Ci |
| blaOXA10-02   | C22 |       |       |      | NoAmplification              |
| blaOXY        | C22 | 34.85 | 87.47 | 1.76 |                              |
| blaPAO        | C22 |       |       |      | NoAmplification              |
| blaPER        | C22 | 36.11 | 78.35 | 1.8  |                              |
| blaPSE        | C22 |       |       |      | NoAmplification              |
| blaROB        | C22 |       |       |      | NoAmplification              |
| blaSFO        | C22 | 30.06 | 86.82 | 1.94 | MultipleMeltPeaks            |
| blaSHV-01     | C22 | 37.73 | 86.44 | 1.57 | MultipleMeltPeaks            |
| blaSHV-02     | C22 |       |       |      | CurveFitFailed               |
| blaTEM        | C22 | 36.34 | 82.07 | 1.88 |                              |
| blaTLA        | C22 |       |       |      | LowEfficiency, CtIsSmall, Ci |
| blaVEB        | C22 |       |       |      | NoAmplification              |
| blaVIM        | C22 |       |       |      | NoAmplification              |
| blaZ          | C22 |       |       |      | LowEfficiency, CtIsSmall, Ci |
| carB          | C22 | 34.26 | 78.84 | 1.95 |                              |
| catA1         | C22 |       |       |      | NoAmplification              |
| catB3         | C22 | 36.57 | 80.01 | 1.84 | MultipleMeltPeaks            |
| catB8         | C22 | 28.53 | 82.81 | 2    |                              |

|            |     |       |       |      |                              |
|------------|-----|-------|-------|------|------------------------------|
| ceoA       | C22 | 26.91 | 82.03 | 1.95 | MultipleMeltPeaks            |
| cepA       | C22 |       |       |      | NoAmplification              |
| cfiA       | C22 | 33.45 | 85.99 | 1.97 | MultipleMeltPeaks            |
| cfr        | C22 |       |       |      | BadR2, LowEfficiency, CtIsS  |
| cfxA       | C22 | 23.89 | 77.65 | 2.08 |                              |
| cmeA       | C22 | 36.55 | 85.02 | 1.77 |                              |
| cmlA1-01   | C22 | 36.04 | 80    | 1.86 | MultipleMeltPeaks            |
| cmlA1-02   | C22 | 35.77 | 79.61 | 1.81 | MultipleMeltPeaks            |
| cmr        | C22 |       |       |      | CurveFitFailed               |
| cmx(A)     | C22 | 26.88 | 84.59 | 2    | MultipleMeltPeaks            |
| cphA-01    | C22 | 32.55 | 85.56 | 1.96 |                              |
| cphA-02    | C22 | 31.78 | 82.51 | 1.94 |                              |
| dfrA1      | C22 | 37.32 | 84.94 | 1.81 | MultipleMeltPeaks            |
| dfrA12     | C22 |       |       |      | CtIsLarge, CurveFitFailed    |
| emrD       | C22 | 33.63 | 90.64 | 1.89 |                              |
| ereA       | C22 | 33.51 | 82.45 | 1.95 |                              |
| ereB       | C22 | 32.89 | 85.71 | 2.04 |                              |
| erm(34)    | C22 |       |       |      | CurveFitFailed               |
| erm(35)    | C22 |       |       |      | CurveFitFailed               |
| erm(36)    | C22 | 29.96 | 84.53 | 1.96 |                              |
| ermA       | C22 |       |       |      | LowEfficiency, CtIsSmall, Ci |
| ermA/ermTR | C22 |       |       |      | NoAmplification              |
| ermB       | C22 | 28.9  | 75.06 | 2.06 |                              |
| ermC       | C22 |       |       |      | LowEfficiency, CtIsSmall, S: |
| ermF       | C22 |       |       |      | LowEfficiency, CtIsSmall, Ci |
| ermJ/ermD  | C22 |       |       |      | NoAmplification              |
| ermK-01    | C22 | 38.16 | 81.38 | 1.9  |                              |
| ermK-02    | C22 | 38.55 | 80.04 | 1.68 |                              |
| ermT-01    | C22 |       |       |      | NoAmplification              |
| ermT-02    | C22 |       |       |      | NoAmplification              |
| ermX       | C22 | 34.93 | 87.38 | 1.73 |                              |
| ermY       | C22 |       |       |      | LowEfficiency, CtIsSmall, Ci |
| fabK       | C22 | 25.05 | 79.64 | 2.13 |                              |
| floR       | C22 | 36.08 | 83.89 | 1.89 | MultipleMeltPeaks            |
| folA       | C22 |       |       |      | NoAmplification              |
| fosB       | C22 |       |       |      | CurveFitFailed               |
| fosX       | C22 |       |       |      | LowEfficiency, CtIsSmall, Ci |
| fox5       | C22 | 28.76 | 86.28 | 2    |                              |
| imiR       | C22 |       |       |      | LowEfficiency, CtIsSmall, S: |
| ImrA-01    | C22 |       |       |      | LowEfficiency, CtIsSmall, S: |
| intl       | C22 | 29.54 | 84.75 | 1.96 |                              |
| intl1      | C22 | 21.6  | 87.07 | 2    |                              |
| IS613      | C22 | 25.51 | 79.61 | 2.07 |                              |
| lnuA-01    | C22 |       |       |      | LowEfficiency, CtIsSmall, S: |
| lnuB-01    | C22 |       |       |      | LowEfficiency, CtIsSmall, Ci |
| lnuB-02    | C22 |       |       |      | NoAmplification              |

|                |     |       |       |      |                              |
|----------------|-----|-------|-------|------|------------------------------|
| lnuC           | C22 | 34.3  | 87.55 | 1.81 |                              |
| marR-01        | C22 | 35.21 | 86.77 | 1.85 |                              |
| matA/mel       | C22 | 21.33 | 77.74 | 2.07 |                              |
| mdet1          | C22 | 36.03 | 73.65 | 1.98 |                              |
| mdtA           | C22 | 33.25 | 81.66 | 1.88 |                              |
| mdtE/yhiU      | C22 | 33.13 | 86.26 | 1.95 |                              |
| mecA           | C22 |       |       |      | NoAmplification              |
| mefA           | C22 | 20.56 | 80.44 | 1.98 | MultipleMeltPeaks            |
| mepA           | C22 | 30.49 | 84.82 | 2.03 |                              |
| mexA           | C22 | 37.21 | 83.39 | 1.8  | MultipleMeltPeaks            |
| mexD           | C22 | 31.03 | 80.44 | 2.01 |                              |
| mexE           | C22 |       |       |      | CurveFitFailed               |
| mexF           | C22 | 28.52 | 89.13 | 2.13 | MultipleMeltPeaks            |
| mphA-01        | C22 | 30.48 | 86.2  | 1.93 |                              |
| mphA-02        | C22 | 31.37 | 76.83 | 1.68 | MultipleMeltPeaks            |
| mphB           | C22 |       |       |      | LowEfficiency, CtIsSmall, S: |
| mphC           | C22 |       |       |      | LowEfficiency, CtIsSmall, Ci |
| msrA-01        | C22 |       |       |      | NoAmplification              |
| msrC-01        | C22 |       |       |      | NoAmplification              |
| mtrC-01        | C22 | 34.21 | 82.81 | 1.94 | MultipleMeltPeaks            |
| mtrC-02        | C22 | 32.44 | 84.68 | 2    |                              |
| mtrD-02        | C22 | 26.65 | 85.07 | 2.07 |                              |
| mtrD-03        | C22 | 41.38 | 85.44 | 1.63 |                              |
| NDM1           | C22 |       |       |      | CurveFitFailed               |
| nimE           | C22 | 32.69 | 76.29 | 1.98 |                              |
| nisB           | C22 |       |       |      | NoAmplification              |
| oleC           | C22 | 41.99 | 62.76 | 1.68 | MultipleMeltPeaks            |
| oprD           | C22 | 27.51 | 84.65 | 1.99 | MultipleMeltPeaks            |
| oprJ           | C22 | 29.82 | 88.1  | 1.97 |                              |
| pbp            | C22 |       |       |      | LowEfficiency, CtIsSmall, Ci |
| pbp2x          | C22 |       |       |      | NoAmplification              |
| Pbp5           | C22 |       |       |      | NoAmplification              |
| penA           | C22 |       |       |      | NoAmplification              |
| pikR1          | C22 | 37.71 | 84.52 | 1.75 | MultipleMeltPeaks            |
| pikR2          | C22 | 30.65 | 84.68 | 2.03 |                              |
| pmrA           | C22 | 24.42 | 79.82 | 2.08 |                              |
| pncA           | C22 | 27.19 | 89.94 | 1.96 |                              |
| putative multi | C22 | 34.21 | 84.21 | 1.97 | MultipleMeltPeaks            |
| qac            | C22 |       |       |      | LowEfficiency, CtIsSmall, S: |
| qacA           | C22 |       |       |      | NoAmplification              |
| qacA/qacB      | C22 |       |       |      | CurveFitFailed               |
| qacEdelta1-0   | C22 |       |       |      | NoAmplification              |
| qacEdelta1-0   | C22 | 32.03 | 84.72 | 1.97 |                              |
| qacH-01        | C22 | 30.88 | 86.52 | 1.97 | MultipleMeltPeaks            |
| qacH-02        | C22 | 33.83 | 84.08 | 1.7  |                              |
| qnrA           | C22 | 33.39 | 79.96 | 2.04 |                              |

|              |     |       |       |      |                              |
|--------------|-----|-------|-------|------|------------------------------|
| rarD-02      | C22 |       |       |      | NoAmplification              |
| sat4         | C22 |       |       |      | LowEfficiency, CtIsSmall, Ci |
| sdeB         | C22 |       |       |      | LowEfficiency, CtIsSmall, S  |
| spcN-01      | C22 |       |       |      | NoAmplification              |
| speA         | C22 |       |       |      | NoAmplification              |
| str          | C22 |       |       |      | CurveFitFailed               |
| strA         | C22 |       |       |      | LowEfficiency, CtIsSmall, Ci |
| strB         | C22 |       |       |      | LowEfficiency, CtIsSmall, Ci |
| sul1         | C22 | 34.83 | 89.82 | 1.8  | MultipleMeltPeaks            |
| sul2         | C22 |       |       |      | BadR2, LowEfficiency, CtIsS  |
| sulA/foIP-01 | C22 | 21.61 | 80.8  | 2.02 |                              |
| sulA/foIP-03 | C22 | 22.58 | 83.25 | 2.01 |                              |
| tet(32)      | C22 | 27.01 | 81.23 | 2    |                              |
| tet(34)      | C22 | 31.46 | 75.71 | 1.98 |                              |
| tet(35)      | C22 |       |       |      | NoAmplification              |
| tet(36)-A    | C22 |       |       |      | CtIsLarge, CurveFitFailed    |
| tet(36)-B    | C22 |       |       |      | LowEfficiency, CtIsSmall, Ci |
| tet(37)      | C22 | 28.2  | 78.05 | 1.99 | MultipleMeltPeaks            |
| tetA-01      | C22 | 30.02 | 85.13 | 1.9  |                              |
| tetA-02      | C22 | 32.18 | 77.32 | 2.02 |                              |
| tetB-01      | C22 | 28.06 | 79.48 | 1.98 |                              |
| tetB-02      | C22 | 27.52 | 79.63 | 2.01 |                              |
| tetC-01      | C22 | 27.15 | 75.31 | 2.05 |                              |
| tetC-02      | C22 | 28.37 | 76.01 | 2.07 |                              |
| tetD-01      | C22 |       |       |      | LowEfficiency, CtIsSmall, Ci |
| tetD-02      | C22 |       |       |      | CtIsLarge, CurveFitFailed    |
| tetE         | C22 | 35.45 | 77.39 | 2.02 |                              |
| tetG-01      | C22 | 31.41 | 82.38 | 1.97 |                              |
| tetG-02      | C22 | 32.12 | 87.25 | 1.91 | MultipleMeltPeaks            |
| tetH         | C22 |       |       |      | NoAmplification              |
| tetJ         | C22 |       |       |      | NoAmplification              |
| tetK         | C22 |       |       |      | LowEfficiency, CtIsSmall, Ci |
| tetL-01      | C22 | 40.61 | 83.53 | 1.64 | MultipleMeltPeaks            |
| tetL-02      | C22 | 31.33 | 85.2  | 1.84 |                              |
| tetM-01      | C22 | 21.44 | 76.22 | 2.04 |                              |
| tetM-02      | C22 | 22.15 | 77.78 | 2.05 |                              |
| tetO-01      | C22 | 25.98 | 76.8  | 2.07 |                              |
| tetPA        | C22 |       |       |      | NoAmplification              |
| tetPB-01     | C22 | 37.83 | 79.94 | 1.87 |                              |
| tetPB-02     | C22 | 28.12 | 85.02 | 2.1  |                              |
| tetPB-03     | C22 |       |       |      | LowEfficiency, CtIsSmall, Ci |
| tetPB-05     | C22 |       |       |      | LowEfficiency, CtIsSmall, S  |
| tetQ         | C22 | 27.12 | 77.17 | 1.98 |                              |
| tetR-02      | C22 | 33.42 | 90.42 | 1.89 |                              |
| tetR-03      | C22 | 26.65 | 76.13 | 2.01 |                              |
| tetS         | C22 | 35.8  | 87.13 | 1.84 | MultipleMeltPeaks            |



|             |     |       |       |      |                               |
|-------------|-----|-------|-------|------|-------------------------------|
| tetT        | C22 |       |       |      | CurveFitFailed                |
| tetU-01     | C22 |       |       |      | NoAmplification               |
| tetV        | C22 |       |       |      | LowEfficiency, CtIsSmall, S:  |
| tetW-01     | C22 | 29.37 | 81.67 | 1.99 |                               |
| tetX        | C22 |       |       |      | LowEfficiency, CtIsSmall, C:  |
| tnpA-01     | C22 |       |       |      | LowEfficiency, CtIsSmall, C:  |
| tnpA-02     | C22 | 33.16 | 85.54 | 1.8  |                               |
| tnpA-03     | C22 | 32.57 | 75.16 | 2.11 |                               |
| tnpA-04     | C22 | 43.21 | 79.51 | 1.7  | MultipleMeltPeaks             |
| tnpA-05     | C22 | 39.29 | 82.18 | 1.69 |                               |
| tnpA-07     | C22 |       |       |      | NoAmplification               |
| tolC-01     | C22 | 37.46 | 80.4  | 1.73 |                               |
| tolC-02     | C22 | 29.56 | 83.51 | 1.94 | MultipleMeltPeaks             |
| tolC-03     | C22 | 30.7  | 84.59 | 1.98 | MultipleMeltPeaks             |
| Tp614       | C22 | 35.88 | 82.53 | 1.85 | MultipleMeltPeaks             |
| ttgA        | C22 |       |       |      | CurveFitFailed                |
| ttgB        | C22 | 33.85 | 79.05 | 2    | MultipleMeltPeaks             |
| vanA        | C22 |       |       |      | NoAmplification               |
| vanB-01     | C22 | 32.11 | 89.16 | 2.02 | MultipleMeltPeaks             |
| vanC-01     | C22 |       |       |      | CurveFitFailed                |
| vanC-02     | C22 |       |       |      | LowEfficiency, CtIsSmall, C:  |
| vanC-03     | C22 | 29.27 | 85.86 | 1.91 |                               |
| vanC1       | C22 |       |       |      | NoAmplification               |
| vanC2/vanC3 | C22 | 32.18 | 78.89 | 1.93 | MultipleMeltPeaks             |
| vanG        | C22 |       |       |      | NoAmplification               |
| vanHB       | C22 |       |       |      | CurveFitFailed                |
| vanHD       | C22 |       |       |      | CtIsSmall, CurveFitFailed, F: |
| vanRA-01    | C22 |       |       |      | NoAmplification               |
| vanRA-02    | C22 |       |       |      | NoAmplification               |
| vanRB       | C22 | 30.61 | 87.34 | 1.99 |                               |
| vanRC       | C22 |       |       |      | LowEfficiency, CtIsSmall, C:  |
| vanRC4      | C22 |       |       |      | LowEfficiency, CtIsSmall, S:  |
| vanRD       | C22 |       |       |      | LowEfficiency, CtIsSmall, S:  |
| vanSA       | C22 |       |       |      | LowEfficiency, CtIsSmall, S:  |
| vanSB       | C22 | 33.47 | 74.17 | 2.06 |                               |
| vanSC-01    | C22 | 34.8  | 84.03 | 1.95 |                               |
| vanSC-02    | C22 |       |       |      | NoAmplification               |
| vanTC-01    | C22 |       |       |      | LowEfficiency, CtIsSmall, S:  |
| vanTC-02    | C22 |       |       |      | NoAmplification               |
| vanTE       | C22 | 38.05 | 88.74 | 1.71 |                               |
| vanTG       | C22 |       |       |      | NoAmplification               |
| vanWB       | C22 |       |       |      | CurveFitFailed                |
| vanWG       | C22 | 36.4  | 74.33 | 1.95 |                               |
| vanXA       | C22 | 34.88 | 77.19 | 2.01 |                               |
| vanXB       | C22 |       |       |      | NoAmplification               |
| vanXD       | C22 | 31.76 | 75.26 | 2.04 |                               |

|              |     |       |       |      |                              |
|--------------|-----|-------|-------|------|------------------------------|
| vanYB        | C22 | 34.94 | 85.28 | 1.95 |                              |
| vanYD-01     | C22 | 31.02 | 82.42 | 1.8  |                              |
| vanYD-02     | C22 |       |       |      | NoAmplification              |
| vatB-01      | C22 | 33.51 | 75.1  | 2.03 |                              |
| vatB-02      | C22 | 35.8  | 80.66 | 1.88 | MultipleMeltPeaks            |
| vatC-01      | C22 | 35.98 | 81.26 | 1.85 |                              |
| vatC-02      | C22 | 32.88 | 85.33 | 1.9  |                              |
| vatE-01      | C22 | 28.88 | 77.11 | 2.12 |                              |
| vatE-02      | C22 | 39.82 | 74.99 | 1.93 |                              |
| vgaA-01      | C22 |       |       |      | LowEfficiency, CtIsSmall, Ci |
| vgaA-02      | C22 |       |       |      | CurveFitFailed               |
| vgb-01       | C22 | 37.34 | 88.18 | 1.79 |                              |
| vgbB-01      | C22 |       |       |      | BadR2, LowEfficiency, CtIsS  |
| vgbB-02      | C22 |       |       |      | NoAmplification              |
| yceE/mdtG-0  | C22 |       |       |      | LowEfficiency, CtIsSmall, S: |
| yceE/mdtG-0  | C22 |       |       |      | NoAmplification              |
| yceL/mdtH-0  | C22 | 28.88 | 84.54 | 1.97 |                              |
| yceL/mdtH-0  | C22 |       |       |      | LowEfficiency, CtIsSmall, Ci |
| yceL/mdtH-0  | C22 | 40.47 | 87.06 | 1.62 | MultipleMeltPeaks            |
| yidY/mdtL-01 | C22 | 30.46 | 84.63 | 2.02 |                              |
| yidY/mdtL-02 | C22 |       |       |      | LowEfficiency, CtIsSmall, Ci |

| Assay          | Sample | Ct | Tm    | Efficiency | Flags                  |
|----------------|--------|----|-------|------------|------------------------|
| 16S rRNA       | C23    |    | 18.04 | 82.25      | 1.98                   |
| aac            | C23    |    | 31    | 85.44      | 1.92                   |
| aac(6')-Ib(akz | C23    |    |       |            | CurveFitFailed         |
| aac(6')-Ib(akz | C23    |    | 33.83 | 86.73      | 1.92 MultipleMeltPeaks |
| aac(6')-Ib(akz | C23    |    | 35.47 | 81.48      | 1.88 MultipleMeltPeaks |
| aac(6')-II     | C23    |    | 36.06 | 81.22      | 1.67 MultipleMeltPeaks |
| aac(6')I1      | C23    |    | 35.73 | 88.02      | 1.81                   |
| aacA/aphD      | C23    |    |       |            | CurveFitFailed         |
| aacC           | C23    |    | 30.82 | 88.43      | 1.85                   |
| aacC1          | C23    |    |       |            | CurveFitFailed         |
| aacC2          | C23    |    | 31.22 | 83.38      | 1.94                   |
| aacC4          | C23    |    | 32.35 | 88.15      | 1.97                   |
| aadA-01        | C23    |    |       |            | NoAmplification        |
| aadA-02        | C23    |    | 31.67 | 80.46      | 1.96                   |
| aadA-1-01      | C23    |    | 32.22 | 79.15      | 1.96                   |
| aadA-1-02      | C23    |    |       |            | NoAmplification        |
| aadA1          | C23    |    | 36.56 | 82.65      | 1.83                   |
| aadA2-01       | C23    |    |       |            | NoAmplification        |
| aadA2-02       | C23    |    | 34.99 | 75.06      | 1.98                   |
| aadA2-03       | C23    |    |       |            | NoAmplification        |
| aadA5-01       | C23    |    | 36.73 | 80.78      | 1.81                   |
| aadA5-02       | C23    |    | 31.23 | 86.43      | 1.96                   |
| aadA9-01       | C23    |    | 32.68 | 89.47      | 1.96 MultipleMeltPeaks |
| aadA9-02       | C23    |    |       |            | CurveFitFailed         |
| aadD           | C23    |    |       |            | NoAmplification        |
| aadE           | C23    |    |       |            | NoAmplification        |
| acrA-01        | C23    |    | 33.05 | 88.75      | 1.87                   |
| acrA-02        | C23    |    | 39.32 | 86         | 1.73 MultipleMeltPeaks |
| acrA-03        | C23    |    |       |            | CurveFitFailed         |
| acrA-04        | C23    |    | 29.91 | 85.65      | 1.97 MultipleMeltPeaks |
| acrA-05        | C23    |    | 29.63 | 88.84      | 1.93                   |
| acrB-01        | C23    |    | 39.51 | 83.08      | 1.73                   |
| acrF           | C23    |    | 31.51 | 82.19      | 1.94 MultipleMeltPeaks |
| acrR-01        | C23    |    | 37.8  | 81.31      | 1.76 MultipleMeltPeaks |
| acrR-02        | C23    |    | 36.64 | 85.61      | 1.77                   |
| Actin          | C23    |    | 22.87 | 86.86      | 1.96                   |
| adeA           | C23    |    |       |            | NoAmplification        |
| ampC-01        | C23    |    | 32.87 | 79.79      | 1.98 MultipleMeltPeaks |
| ampC-02        | C23    |    |       |            | NoAmplification        |
| ampC-04        | C23    |    | 31.51 | 78.75      | 1.87 MultipleMeltPeaks |
| ampC-05        | C23    |    |       |            | NoAmplification        |
| ampC-06        | C23    |    |       |            | CurveFitFailed         |
| ampC-07        | C23    |    | 33.18 | 88.29      | 1.86                   |
| ampC-09        | C23    |    |       |            | CurveFitFailed         |
| ampC/blaDH     | C23    |    | 31.87 | 84.34      | 1.95                   |

|                          |     |       |       |      |                             |
|--------------------------|-----|-------|-------|------|-----------------------------|
| aph                      | C23 |       |       |      | NoAmplification             |
| aph(2')-Id-01            | C23 |       |       |      | NoAmplification             |
| aph(2')-Id-02            | C23 |       |       |      | NoAmplification             |
| aph6ia                   | C23 | 24.53 | 78.63 | 1.96 |                             |
| aphA1(aka k <sub>z</sub> | C23 |       |       |      | NoAmplification             |
| bacA-01                  | C23 |       |       |      | NoAmplification             |
| bacA-02                  | C23 |       |       |      | CurveFitFailed              |
| BETA-globin              | C23 | 24.49 | 84.08 | 1.96 |                             |
| bla-ACC-1                | C23 | 36.07 | 85.94 | 1.79 | MultipleMeltPeaks           |
| bla-L1                   | C23 | 31.69 | 85.25 | 1.96 |                             |
| bla1                     | C23 |       |       |      | NoAmplification             |
| blaCMY                   | C23 |       |       |      | CurveFitFailed              |
| blaCMY2-01               | C23 | 33.01 | 75.53 | 2.11 |                             |
| blaCMY2-02               | C23 | 29.43 | 83.48 | 1.98 | MultipleMeltPeaks           |
| blaCTX-M-01              | C23 | 43.21 | 86.4  | 1.69 | MultipleMeltPeaks           |
| blaCTX-M-02              | C23 | 34.87 | 78.6  | 1.87 | MultipleMeltPeaks           |
| blaCTX-M-03              | C23 | 40.82 | 83.9  | 1.74 |                             |
| blaCTX-M-04              | C23 | 31.51 | 81.51 | 2    | MultipleMeltPeaks           |
| blaCTX-M-05              | C23 | 31.13 | 76.91 | 1.79 |                             |
| blaCTX-M-06              | C23 |       |       |      | NoAmplification             |
| blaGES                   | C23 |       |       |      | NoAmplification             |
| blaIMP-01                | C23 |       |       |      | NoAmplification             |
| blaIMP-02                | C23 |       |       |      | BadR2, LowEfficiency, CtIs5 |
| blaMOX/blaC              | C23 |       |       |      | NoAmplification             |
| blaOCH                   | C23 | 31.73 | 83.64 | 2.11 | MultipleMeltPeaks           |
| blaOKP                   | C23 |       |       |      | NoAmplification             |
| blaOXA1/blaC             | C23 |       |       |      | NoAmplification             |
| blaOXA10-01              | C23 |       |       |      | NoAmplification             |
| blaOXA10-02              | C23 |       |       |      | NoAmplification             |
| blaOXY                   | C23 | 36.84 | 87.48 | 1.71 | MultipleMeltPeaks           |
| blaPAO                   | C23 |       |       |      | CurveFitFailed              |
| blaPER                   | C23 |       |       |      | CurveFitFailed              |
| blaPSE                   | C23 |       |       |      | NoAmplification             |
| blaROB                   | C23 |       |       |      | CurveFitFailed              |
| blaSFO                   | C23 | 28.82 | 88.49 | 1.93 |                             |
| blaSHV-01                | C23 |       |       |      | CurveFitFailed              |
| blaSHV-02                | C23 |       |       |      | NoAmplification             |
| blaTEM                   | C23 |       |       |      | NoAmplification             |
| blaTLA                   | C23 |       |       |      | NoAmplification             |
| blaVEB                   | C23 |       |       |      | CurveFitFailed              |
| blaVIM                   | C23 |       |       |      | NoAmplification             |
| blaZ                     | C23 |       |       |      | NoAmplification             |
| carB                     | C23 | 34.53 | 82.37 | 1.94 |                             |
| catA1                    | C23 |       |       |      | NoAmplification             |
| catB3                    | C23 |       |       |      | NoAmplification             |
| catB8                    | C23 | 29.89 | 81.09 | 1.96 |                             |

|            |     |       |       |      |                             |
|------------|-----|-------|-------|------|-----------------------------|
| ceoA       | C23 | 28.48 | 82.13 | 1.94 | MultipleMeltPeaks           |
| cepA       | C23 |       |       |      | NoAmplification             |
| cfiA       | C23 | 33.75 | 85.35 | 1.87 | MultipleMeltPeaks           |
| cfr        | C23 |       |       |      | NoAmplification             |
| cfxA       | C23 | 21.78 | 77.73 | 2.09 |                             |
| cmeA       | C23 | 38.36 | 84.77 | 1.77 |                             |
| cmlA1-01   | C23 |       |       |      | CurveFitFailed              |
| cmlA1-02   | C23 | 32.71 | 89.6  | 1.88 |                             |
| cmr        | C23 |       |       |      | CurveFitFailed              |
| cmx(A)     | C23 | 27.34 | 86.67 | 1.96 | MultipleMeltPeaks           |
| cphA-01    | C23 | 33.65 | 85.59 | 1.94 |                             |
| cphA-02    | C23 | 34.53 | 78.27 | 1.92 |                             |
| dfrA1      | C23 |       |       |      | NoAmplification             |
| dfrA12     | C23 | 43.17 | 85.91 | 1.54 | MultipleMeltPeaks           |
| emrD       | C23 | 36.91 | 88.11 | 1.74 |                             |
| ereA       | C23 |       |       |      | CurveFitFailed              |
| ereB       | C23 |       |       |      | CurveFitFailed              |
| erm(34)    | C23 |       |       |      | NoAmplification             |
| erm(35)    | C23 |       |       |      | NoAmplification             |
| erm(36)    | C23 | 32.68 | 86.03 | 2.1  |                             |
| ermA       | C23 |       |       |      | NoAmplification             |
| ermA/ermTR | C23 |       |       |      | NoAmplification             |
| ermB       | C23 | 26.81 | 75.13 | 2.08 |                             |
| ermC       | C23 |       |       |      | CurveFitFailed              |
| ermF       | C23 |       |       |      | NoAmplification             |
| ermJ/ermD  | C23 |       |       |      | CurveFitFailed              |
| ermK-01    | C23 |       |       |      | NoAmplification             |
| ermK-02    | C23 |       |       |      | NoAmplification             |
| ermT-01    | C23 |       |       |      | NoAmplification             |
| ermT-02    | C23 |       |       |      | BadR2, LowEfficiency, CtIsS |
| ermX       | C23 |       |       |      | CurveFitFailed              |
| ermY       | C23 |       |       |      | NoAmplification             |
| fabK       | C23 | 25.08 | 79.46 | 2.1  |                             |
| floR       | C23 |       |       |      | NoAmplification             |
| folA       | C23 |       |       |      | NoAmplification             |
| fosB       | C23 |       |       |      | CurveFitFailed              |
| fosX       | C23 |       |       |      | NoAmplification             |
| fox5       | C23 | 28.94 | 86.77 | 1.97 | MultipleMeltPeaks           |
| imiR       | C23 |       |       |      | CurveFitFailed              |
| lmrA-01    | C23 |       |       |      | NoAmplification             |
| intl       | C23 | 30.28 | 84.74 | 1.95 |                             |
| intl1      | C23 | 23.03 | 86.7  | 1.98 |                             |
| IS613      | C23 | 22.6  | 79.69 | 2.07 |                             |
| lnuA-01    | C23 |       |       |      | BadR2, LowEfficiency, CtIsS |
| lnuB-01    | C23 |       |       |      | NoAmplification             |
| lnuB-02    | C23 |       |       |      | NoAmplification             |

|                |     |       |       |      |                   |
|----------------|-----|-------|-------|------|-------------------|
| lnuC           | C23 | 36.05 | 88.83 | 1.64 | MultipleMeltPeaks |
| marR-01        | C23 | 33.78 | 85.42 | 1.9  |                   |
| matA/mel       | C23 | 22.72 | 77.74 | 2.06 |                   |
| mdet1          | C23 |       |       |      | NoAmplification   |
| mdtA           | C23 |       |       |      | CurveFitFailed    |
| mdtE/yhiU      | C23 | 35.68 | 88.84 | 1.8  | MultipleMeltPeaks |
| mecA           | C23 |       |       |      | NoAmplification   |
| mefA           | C23 | 22.36 | 80.62 | 1.98 |                   |
| mepA           | C23 | 31.42 | 89.99 | 1.99 | MultipleMeltPeaks |
| mexA           | C23 |       |       |      | NoAmplification   |
| mexD           | C23 | 31.05 | 80.42 | 2.01 |                   |
| mexE           | C23 |       |       |      | NoAmplification   |
| mexF           | C23 | 29.66 | 86.39 | 1.96 |                   |
| mphA-01        | C23 | 30.59 | 88.35 | 1.98 |                   |
| mphA-02        | C23 | 32.3  | 89.44 | 1.89 | MultipleMeltPeaks |
| mphB           | C23 |       |       |      | CurveFitFailed    |
| mphC           | C23 |       |       |      | NoAmplification   |
| msrA-01        | C23 |       |       |      | NoAmplification   |
| msrC-01        | C23 |       |       |      | NoAmplification   |
| mtrC-01        | C23 | 44.7  | 63.55 | 1.54 | MultipleMeltPeaks |
| mtrC-02        | C23 |       |       |      | CurveFitFailed    |
| mtrD-02        | C23 | 28.94 | 83.02 | 2.03 |                   |
| mtrD-03        | C23 | 28.8  | 83.1  | 1.88 |                   |
| NDM1           | C23 | 42.46 | 82.69 | 1.68 |                   |
| nimE           | C23 | 36.04 | 78.5  | 1.9  |                   |
| nisB           | C23 |       |       |      | NoAmplification   |
| oleC           | C23 | 36.13 | 89.76 | 1.8  |                   |
| oprD           | C23 | 29.22 | 86.98 | 2.01 |                   |
| oprJ           | C23 | 28.88 | 92.04 | 1.88 |                   |
| pbp            | C23 |       |       |      | NoAmplification   |
| pbp2x          | C23 | 29.04 | 74.92 | 1.95 |                   |
| Pbp5           | C23 |       |       |      | NoAmplification   |
| penA           | C23 |       |       |      | NoAmplification   |
| pikR1          | C23 | 33.73 | 89.16 | 1.88 |                   |
| pikR2          | C23 | 31.71 | 85.18 | 2.03 |                   |
| pmrA           | C23 | 24.39 | 79.09 | 2.11 |                   |
| pncA           | C23 | 29.35 | 89.13 | 1.93 |                   |
| putative multi | C23 | 35.91 | 77.09 | 1.9  | MultipleMeltPeaks |
| qac            | C23 |       |       |      | CurveFitFailed    |
| qacA           | C23 |       |       |      | NoAmplification   |
| qacA/qacB      | C23 |       |       |      | CurveFitFailed    |
| qacEdelta1-0   | C23 |       |       |      | NoAmplification   |
| qacEdelta1-0   | C23 | 36.66 | 90.32 | 1.81 | MultipleMeltPeaks |
| qacH-01        | C23 | 30.75 | 87.84 | 1.95 |                   |
| qacH-02        | C23 | 38.25 | 83.52 | 1.6  |                   |
| qnrA           | C23 |       |       |      | NoAmplification   |

|              |     |       |       |      |                   |
|--------------|-----|-------|-------|------|-------------------|
| rarD-02      | C23 |       |       |      | NoAmplification   |
| sat4         | C23 |       |       |      | NoAmplification   |
| sdeB         | C23 |       |       |      | CurveFitFailed    |
| spcN-01      | C23 |       |       |      | NoAmplification   |
| speA         | C23 |       |       |      | NoAmplification   |
| str          | C23 |       |       |      | NoAmplification   |
| strA         | C23 |       |       |      | NoAmplification   |
| strB         | C23 | 37.19 | 75.85 | 1.86 |                   |
| sul1         | C23 |       |       |      | NoAmplification   |
| sul2         | C23 |       |       |      | NoAmplification   |
| sulA/foIP-01 | C23 | 22.67 | 81.5  | 2    |                   |
| sulA/foIP-03 | C23 | 23.2  | 83.17 | 2.01 |                   |
| tet(32)      | C23 | 26.64 | 81.25 | 1.99 |                   |
| tet(34)      | C23 | 29.48 | 75.99 | 2.01 |                   |
| tet(35)      | C23 |       |       |      | NoAmplification   |
| tet(36)-A    | C23 |       |       |      | NoAmplification   |
| tet(36)-B    | C23 |       |       |      | NoAmplification   |
| tet(37)      | C23 | 22.82 | 76.62 | 2    |                   |
| tetA-01      | C23 | 32.38 | 85.09 | 1.92 |                   |
| tetA-02      | C23 | 34.45 | 87.44 | 1.78 |                   |
| tetB-01      | C23 | 28.19 | 86.28 | 1.98 |                   |
| tetB-02      | C23 | 28.19 | 79.61 | 1.99 |                   |
| tetC-01      | C23 | 28.14 | 75.35 | 2.01 |                   |
| tetC-02      | C23 | 26.98 | 76.1  | 2.05 |                   |
| tetD-01      | C23 |       |       |      | NoAmplification   |
| tetD-02      | C23 | 30.86 | 82.2  | 1.99 |                   |
| tetE         | C23 | 35.72 | 86.23 | 1.87 |                   |
| tetG-01      | C23 | 31.74 | 89.85 | 1.89 |                   |
| tetG-02      | C23 |       |       |      | CurveFitFailed    |
| tetH         | C23 |       |       |      | NoAmplification   |
| tetJ         | C23 |       |       |      | NoAmplification   |
| tetK         | C23 |       |       |      | NoAmplification   |
| tetL-01      | C23 |       |       |      | NoAmplification   |
| tetL-02      | C23 | 33.13 | 85.1  | 1.81 | MultipleMeltPeaks |
| tetM-01      | C23 | 22.9  | 76.4  | 1.99 |                   |
| tetM-02      | C23 | 23.46 | 77.73 | 2.03 |                   |
| tetO-01      | C23 |       |       |      | NoAmplification   |
| tetPA        | C23 |       |       |      | NoAmplification   |
| tetPB-01     | C23 |       |       |      | NoAmplification   |
| tetPB-02     | C23 | 32.22 | 84.8  | 2.01 |                   |
| tetPB-03     | C23 |       |       |      | NoAmplification   |
| tetPB-05     | C23 |       |       |      | NoAmplification   |
| tetQ         | C23 | 23.15 | 76.07 | 2.03 |                   |
| tetR-02      | C23 | 31.82 | 85.97 | 1.86 | MultipleMeltPeaks |
| tetR-03      | C23 | 27.8  | 76.14 | 2    |                   |
| tetS         | C23 |       |       |      | CurveFitFailed    |

|             |     |       |       |                             |
|-------------|-----|-------|-------|-----------------------------|
| tetT        | C23 |       |       | NoAmplification             |
| tetU-01     | C23 |       |       | NoAmplification             |
| tetV        | C23 | 32.91 | 89.07 | 1.84                        |
| tetW-01     | C23 | 25.95 | 81.9  | 1.98                        |
| tetX        | C23 | 41.36 | 82.08 | 1.76 MultipleMeltPeaks      |
| tnpA-01     | C23 |       |       | CurveFitFailed              |
| tnpA-02     | C23 | 34.16 | 84.55 | 1.77 MultipleMeltPeaks      |
| tnpA-03     | C23 | 37.9  | 75.47 | 1.84                        |
| tnpA-04     | C23 |       |       | NoAmplification             |
| tnpA-05     | C23 | 38.7  | 76.37 | 1.78                        |
| tnpA-07     | C23 |       |       | NoAmplification             |
| tolC-01     | C23 |       |       | CurveFitFailed              |
| tolC-02     | C23 | 29.63 | 84.91 | 1.95                        |
| tolC-03     | C23 | 31.02 | 86.71 | 1.93                        |
| Tp614       | C23 | 35.12 | 77.98 | 1.92                        |
| ttgA        | C23 | 39.27 | 89.81 | 1.62 MultipleMeltPeaks      |
| ttgB        | C23 | 35.13 | 89    | 1.87 MultipleMeltPeaks      |
| vanA        | C23 |       |       | NoAmplification             |
| vanB-01     | C23 | 33.94 | 83.8  | 1.94 MultipleMeltPeaks      |
| vanC-01     | C23 |       |       | NoAmplification             |
| vanC-02     | C23 |       |       | NoAmplification             |
| vanC-03     | C23 | 28.49 | 85.93 | 1.93                        |
| vanC1       | C23 |       |       | NoAmplification             |
| vanC2/vanC3 | C23 | 38.87 | 82.65 | 1.74                        |
| vanG        | C23 |       |       | NoAmplification             |
| vanHB       | C23 | 39.6  | 89.26 | 1.68 MultipleMeltPeaks      |
| vanHD       | C23 | 33.1  | 75.55 | 1.92                        |
| vanRA-01    | C23 |       |       | NoAmplification             |
| vanRA-02    | C23 |       |       | NoAmplification             |
| vanRB       | C23 | 36.96 | 87.36 | 1.74                        |
| vanRC       | C23 |       |       | NoAmplification             |
| vanRC4      | C23 |       |       | BadR2, LowEfficiency, CtIsS |
| vanRD       | C23 |       |       | NoAmplification             |
| vanSA       | C23 |       |       | NoAmplification             |
| vanSB       | C23 | 33.38 | 74.24 | 2.07                        |
| vanSC-01    | C23 | 36.97 | 62.54 | 2.53 MultipleMeltPeaks      |
| vanSC-02    | C23 | 32.1  | 76.2  | 1.85                        |
| vanTC-01    | C23 |       |       | NoAmplification             |
| vanTC-02    | C23 | 35.83 | 82.7  | 1.87                        |
| vanTE       | C23 |       |       | CurveFitFailed              |
| vanTG       | C23 |       |       | NoAmplification             |
| vanWB       | C23 |       |       | NoAmplification             |
| vanWG       | C23 | 37.78 | 74.11 | 1.88                        |
| vanXA       | C23 |       |       | CurveFitFailed              |
| vanXB       | C23 |       |       | NoAmplification             |
| vanXD       | C23 | 31.87 | 75.03 | 1.98                        |



|              |     |       |       |      |                   |
|--------------|-----|-------|-------|------|-------------------|
| vanYB        | C23 |       |       |      | NoAmplification   |
| vanYD-01     | C23 | 30.81 | 81.61 | 1.72 | MultipleMeltPeaks |
| vanYD-02     | C23 |       |       |      | NoAmplification   |
| vatB-01      | C23 |       |       |      | CurveFitFailed    |
| vatB-02      | C23 | 44.96 | 62.56 | 1.89 | MultipleMeltPeaks |
| vatC-01      | C23 |       |       |      | CurveFitFailed    |
| vatC-02      | C23 |       |       |      | CurveFitFailed    |
| vatE-01      | C23 | 30.15 | 77.23 | 2.09 |                   |
| vatE-02      | C23 |       |       |      | NoAmplification   |
| vgaA-01      | C23 |       |       |      | CurveFitFailed    |
| vgaA-02      | C23 |       |       |      | CurveFitFailed    |
| vgb-01       | C23 | 44.46 | 62.74 | 1.58 | MultipleMeltPeaks |
| vgbB-01      | C23 |       |       |      | NoAmplification   |
| vgbB-02      | C23 |       |       |      | NoAmplification   |
| yceE/mdtG-0  | C23 |       |       |      | CurveFitFailed    |
| yceE/mdtG-0  | C23 | 34.25 | 81.16 | 1.98 |                   |
| yceL/mdtH-0  | C23 | 26.95 | 76.88 | 2.01 |                   |
| yceL/mdtH-0  | C23 |       |       |      | NoAmplification   |
| yceL/mdtH-0  | C23 | 33.28 | 79.43 | 1.9  | MultipleMeltPeaks |
| yidY/mdtL-01 | C23 | 32.56 | 85.14 | 1.96 |                   |
| yidY/mdtL-02 | C23 |       |       |      | NoAmplification   |

| Assay          | Sample | Ct | Tm    | Efficiency | Flags                        |
|----------------|--------|----|-------|------------|------------------------------|
| 16S rRNA       | C24    |    | 16.13 | 82.22      | 2.06                         |
| aac            | C24    |    | 30.3  | 86.29      | 1.8                          |
| aac(6')-Ib(akz | C24    |    |       |            | LowEfficiency, CtIsSmall, Ci |
| aac(6')-Ib(akz | C24    |    | 32.74 | 86.01      | 1.94                         |
| aac(6')-Ib(akz | C24    |    | 34.77 | 79.57      | 1.92 MultipleMeltPeaks       |
| aac(6')-II     | C24    |    | 38.71 | 81.12      | 1.55 MultipleMeltPeaks       |
| aac(6')I1      | C24    |    | 32.81 | 87.92      | 1.89                         |
| aacA/aphD      | C24    |    |       |            | LowEfficiency, CtIsSmall, S: |
| aacC           | C24    |    | 26.62 | 88.56      | 1.88                         |
| aacC1          | C24    |    |       |            | NoAmplification              |
| aacC2          | C24    |    |       |            | NoAmplification              |
| aacC4          | C24    |    |       |            | NoAmplification              |
| aadA-01        | C24    |    |       |            | NoAmplification              |
| aadA-02        | C24    |    |       |            | NoAmplification              |
| aadA-1-01      | C24    |    |       |            | NoAmplification              |
| aadA-1-02      | C24    |    |       |            | NoAmplification              |
| aadA1          | C24    |    | 38.19 | 84.33      | 1.9 MultipleMeltPeaks        |
| aadA2-01       | C24    |    |       |            | NoAmplification              |
| aadA2-02       | C24    |    | 31.89 | 75.33      | 1.94                         |
| aadA2-03       | C24    |    |       |            | NoAmplification              |
| aadA5-01       | C24    |    | 36.24 | 84.83      | 1.84                         |
| aadA5-02       | C24    |    | 31.85 | 88.09      | 1.89 MultipleMeltPeaks       |
| aadA9-01       | C24    |    | 34.81 | 82.07      | 1.9 MultipleMeltPeaks        |
| aadA9-02       | C24    |    | 36.96 | 84.58      | 1.87                         |
| aadD           | C24    |    |       |            | NoAmplification              |
| aadE           | C24    |    |       |            | NoAmplification              |
| acrA-01        | C24    |    | 32.16 | 88.83      | 1.95                         |
| acrA-02        | C24    |    | 39.44 | 84.81      | 1.83 MultipleMeltPeaks       |
| acrA-03        | C24    |    | 38.3  | 87.47      | 1.68 MultipleMeltPeaks       |
| acrA-04        | C24    |    | 30.63 | 90.28      | 1.81                         |
| acrA-05        | C24    |    | 29.16 | 88.87      | 1.97                         |
| acrB-01        | C24    |    | 33.13 | 85.99      | 1.91                         |
| acrF           | C24    |    | 31.07 | 81.94      | 1.96 MultipleMeltPeaks       |
| acrR-01        | C24    |    | 34.93 | 81.31      | 1.89                         |
| acrR-02        | C24    |    | 35.68 | 86.6       | 1.79 MultipleMeltPeaks       |
| Actin          | C24    |    | 21.3  | 86.84      | 1.98                         |
| adeA           | C24    |    | 33.96 | 83.22      | 1.84                         |
| ampC-01        | C24    |    | 29.06 | 85.33      | 2.02 MultipleMeltPeaks       |
| ampC-02        | C24    |    | 30.08 | 89.59      | 2                            |
| ampC-04        | C24    |    | 33.72 | 78.26      | 1.93                         |
| ampC-05        | C24    |    |       |            | NoAmplification              |
| ampC-06        | C24    |    |       |            | CtIsLarge, CurveFitFailed    |
| ampC-07        | C24    |    | 36.98 | 88.15      | 1.75                         |
| ampC-09        | C24    |    |       |            | NoAmplification              |
| ampC/blaDH     | C24    |    | 29.97 | 84.44      | 1.97                         |

|                            |     |       |       |      |                                          |
|----------------------------|-----|-------|-------|------|------------------------------------------|
| aph                        | C24 |       |       |      | NoAmplification                          |
| aph(2')-Id-01              | C24 |       |       |      | NoAmplification                          |
| aph(2')-Id-02              | C24 |       |       |      | NoAmplification                          |
| aph6ia                     | C24 | 26.91 | 78.32 | 1.99 |                                          |
| aphA1(aka k <sub>2</sub> ) | C24 |       |       |      | LowEfficiency, CtIsSmall, S <sub>c</sub> |
| bacA-01                    | C24 | 37.3  | 83.2  | 1.89 |                                          |
| bacA-02                    | C24 |       |       |      | CurveFitFailed                           |
| BETA-globin                | C24 | 22.85 | 84.1  | 1.98 |                                          |
| bla-ACC-1                  | C24 |       |       |      | NoAmplification                          |
| bla-L1                     | C24 | 29.9  | 85.48 | 1.91 |                                          |
| bla1                       | C24 |       |       |      | NoAmplification                          |
| blaCMY                     | C24 | 37.91 | 79.97 | 1.87 |                                          |
| blaCMY2-01                 | C24 |       |       |      | NoAmplification                          |
| blaCMY2-02                 | C24 | 29.88 | 85.91 | 1.96 |                                          |
| blaCTX-M-01                | C24 |       |       |      | CurveFitFailed                           |
| blaCTX-M-02                | C24 |       |       |      | NoAmplification                          |
| blaCTX-M-03                | C24 |       |       |      | LowEfficiency, CtIsSmall, C <sub>i</sub> |
| blaCTX-M-04                | C24 | 33.97 | 84    | 1.77 | MultipleMeltPeaks                        |
| blaCTX-M-05                | C24 | 34.59 | 75.95 | 1.85 |                                          |
| blaCTX-M-06                | C24 | 35.62 | 85.09 | 1.86 | MultipleMeltPeaks                        |
| blaGES                     | C24 |       |       |      | NoAmplification                          |
| blaIMP-01                  | C24 |       |       |      | NoAmplification                          |
| blaIMP-02                  | C24 |       |       |      | LowEfficiency, CtIsSmall, C <sub>i</sub> |
| blaMOX/blaC                | C24 |       |       |      | NoAmplification                          |
| blaOCH                     | C24 |       |       |      | NoAmplification                          |
| blaOKP                     | C24 |       |       |      | NoAmplification                          |
| blaOXA1/blaC               | C24 |       |       |      | NoAmplification                          |
| blaOXA10-01                | C24 |       |       |      | NoAmplification                          |
| blaOXA10-02                | C24 |       |       |      | NoAmplification                          |
| blaOXY                     | C24 | 37.03 | 89.48 | 1.68 |                                          |
| blaPAO                     | C24 | 43.82 | 62.9  | 1.55 | MultipleMeltPeaks                        |
| blaPER                     | C24 |       |       |      | BadR2, LowEfficiency, CtIsS              |
| blaPSE                     | C24 |       |       |      | NoAmplification                          |
| blaROB                     | C24 |       |       |      | CurveFitFailed                           |
| blaSFO                     | C24 | 29.29 | 87.14 | 1.93 |                                          |
| blaSHV-01                  | C24 |       |       |      | NoAmplification                          |
| blaSHV-02                  | C24 |       |       |      | CtIsLarge, CurveFitFailed                |
| blaTEM                     | C24 |       |       |      | NoAmplification                          |
| blaTLA                     | C24 |       |       |      | NoAmplification                          |
| blaVEB                     | C24 |       |       |      | NoAmplification                          |
| blaVIM                     | C24 |       |       |      | NoAmplification                          |
| blaZ                       | C24 |       |       |      | NoAmplification                          |
| carB                       | C24 | 34.21 | 85.12 | 1.96 | MultipleMeltPeaks                        |
| catA1                      | C24 |       |       |      | NoAmplification                          |
| catB3                      | C24 | 39.63 | 79.81 | 1.61 | MultipleMeltPeaks                        |
| catB8                      | C24 | 29.04 | 82.66 | 1.98 |                                          |

|            |     |       |       |      |                              |
|------------|-----|-------|-------|------|------------------------------|
| ceoA       | C24 | 28.35 | 82.25 | 1.99 |                              |
| cepA       | C24 |       |       |      | NoAmplification              |
| cfiA       | C24 |       |       |      | NoAmplification              |
| cfr        | C24 |       |       |      | LowEfficiency, CtIsSmall, S: |
| cfxA       | C24 | 19.75 | 77.61 | 1.93 |                              |
| cmeA       | C24 |       |       |      | LowEfficiency, CtIsSmall, S: |
| cmlA1-01   | C24 | 30.71 | 76.49 | 1.96 |                              |
| cmlA1-02   | C24 | 33.57 | 88.77 | 1.96 |                              |
| cmr        | C24 |       |       |      | LowEfficiency, CtIsSmall, S: |
| cmx(A)     | C24 | 29    | 84.4  | 1.94 | MultipleMeltPeaks            |
| cphA-01    | C24 | 31.77 | 85.63 | 1.68 |                              |
| cphA-02    | C24 | 35.36 | 86.21 | 1.89 |                              |
| dfrA1      | C24 |       |       |      | NoAmplification              |
| dfrA12     | C24 |       |       |      | NoAmplification              |
| emrD       | C24 | 39.15 | 63.89 | 1.64 | MultipleMeltPeaks            |
| ereA       | C24 |       |       |      | CurveFitFailed               |
| ereB       | C24 |       |       |      | CurveFitFailed               |
| erm(34)    | C24 | 33.73 | 89.94 | 1.99 |                              |
| erm(35)    | C24 |       |       |      | NoAmplification              |
| erm(36)    | C24 |       |       |      | NoAmplification              |
| ermA       | C24 |       |       |      | LowEfficiency, CtIsSmall, S: |
| ermA/ermTR | C24 |       |       |      | NoAmplification              |
| ermB       | C24 | 22.91 | 74.94 | 2.05 |                              |
| ermC       | C24 |       |       |      | LowEfficiency, CtIsSmall, C: |
| ermF       | C24 | 27.91 | 74.53 | 2.01 |                              |
| ermJ/ermD  | C24 |       |       |      | NoAmplification              |
| ermK-01    | C24 |       |       |      | NoAmplification              |
| ermK-02    | C24 |       |       |      | NoAmplification              |
| ermT-01    | C24 |       |       |      | NoAmplification              |
| ermT-02    | C24 | 41.94 | 78.49 | 1.75 |                              |
| ermX       | C24 | 42.93 | 66.63 | 1.54 | MultipleMeltPeaks            |
| ermY       | C24 |       |       |      | NoAmplification              |
| fabK       | C24 | 26.59 | 79.24 | 2.12 |                              |
| floR       | C24 | 36.21 | 86.84 | 1.77 | MultipleMeltPeaks            |
| folA       | C24 |       |       |      | NoAmplification              |
| fosB       | C24 |       |       |      | LowEfficiency, CtIsSmall, S: |
| fosX       | C24 |       |       |      | NoAmplification              |
| fox5       | C24 | 29.85 | 86.18 | 1.84 | MultipleMeltPeaks            |
| imiR       | C24 |       |       |      | CurveFitFailed               |
| ImrA-01    | C24 | 38.28 | 79.57 | 1.82 |                              |
| intl       | C24 | 31.05 | 87.21 | 1.96 |                              |
| intl1      | C24 | 22.96 | 83.46 | 1.93 | MultipleMeltPeaks            |
| IS613      | C24 | 20.2  | 79.63 | 2.06 |                              |
| lnuA-01    | C24 |       |       |      | LowEfficiency, CtIsSmall, S: |
| lnuB-01    | C24 |       |       |      | CurveFitFailed               |
| lnuB-02    | C24 |       |       |      | NoAmplification              |

|               |     |       |       |      |                              |
|---------------|-----|-------|-------|------|------------------------------|
| lnuC          | C24 | 40.28 | 75.84 | 1.55 | MultipleMeltPeaks            |
| marR-01       | C24 | 32.31 | 89.51 | 1.91 |                              |
| matA/mel      | C24 | 20.47 | 77.7  | 2.06 |                              |
| mdetI1        | C24 |       |       |      | NoAmplification              |
| mdtA          | C24 | 39.24 | 80.48 | 1.76 | MultipleMeltPeaks            |
| mdtE/yhiU     | C24 | 33.67 | 90    | 1.78 |                              |
| mecA          | C24 |       |       |      | NoAmplification              |
| mefA          | C24 | 19.62 | 80.49 | 1.99 |                              |
| mepA          | C24 | 33.31 | 84.32 | 1.99 | MultipleMeltPeaks            |
| mexA          | C24 | 38.49 | 63.37 | 1.76 | MultipleMeltPeaks            |
| mexD          | C24 | 34.31 | 79.92 | 1.93 |                              |
| mexE          | C24 | 36.68 | 83.62 | 1.8  | MultipleMeltPeaks            |
| mexF          | C24 | 26.67 | 86.48 | 1.64 | MultipleMeltPeaks            |
| mphA-01       | C24 | 27.5  | 88.75 | 1.97 |                              |
| mphA-02       | C24 | 31.72 | 86.81 | 1.55 |                              |
| mphB          | C24 | 34.94 | 89.47 | 1.86 |                              |
| mphC          | C24 |       |       |      | NoAmplification              |
| msrA-01       | C24 |       |       |      | NoAmplification              |
| msrC-01       | C24 |       |       |      | NoAmplification              |
| mtrC-01       | C24 |       |       |      | BadR2, CtIsLarge, CurveFitI  |
| mtrC-02       | C24 |       |       |      | NoAmplification              |
| mtrD-02       | C24 | 28.72 | 81.17 | 1.9  | MultipleMeltPeaks            |
| mtrD-03       | C24 | 34.02 | 82.71 | 1.87 |                              |
| NDM1          | C24 |       |       |      | NoAmplification              |
| nimE          | C24 | 36.38 | 75.06 | 2.01 |                              |
| nisB          | C24 |       |       |      | NoAmplification              |
| oleC          | C24 | 32.3  | 89.56 | 1.91 |                              |
| oprD          | C24 | 29.83 | 81.57 | 1.99 | MultipleMeltPeaks            |
| oprJ          | C24 | 30.76 | 87.72 | 1.77 |                              |
| pbp           | C24 |       |       |      | CurveFitFailed               |
| pbp2x         | C24 |       |       |      | NoAmplification              |
| Pbp5          | C24 |       |       |      | LowEfficiency, CtIsSmall, S: |
| penA          | C24 |       |       |      | NoAmplification              |
| pikR1         | C24 | 33.56 | 89.47 | 1.9  |                              |
| pikR2         | C24 | 30.23 | 84.36 | 2.07 |                              |
| pmrA          | C24 | 24.04 | 79.43 | 2.08 |                              |
| pncA          | C24 | 28.46 | 90.22 | 1.96 |                              |
| putative mulI | C24 |       |       |      | NoAmplification              |
| qac           | C24 |       |       |      | NoAmplification              |
| qacA          | C24 |       |       |      | NoAmplification              |
| qacA/qacB     | C24 |       |       |      | NoAmplification              |
| qacEdelta1-0  | C24 |       |       |      | NoAmplification              |
| qacEdelta1-0  | C24 | 36.84 | 74.55 | 1.87 | MultipleMeltPeaks            |
| qacH-01       | C24 | 32.03 | 81.92 | 1.87 | MultipleMeltPeaks            |
| qacH-02       | C24 | 34.1  | 83.59 | 1.73 |                              |
| qnrA          | C24 |       |       |      | NoAmplification              |

|              |     |       |       |      |                             |
|--------------|-----|-------|-------|------|-----------------------------|
| rarD-02      | C24 | 31.88 | 84    | 1.96 |                             |
| sat4         | C24 |       |       |      | NoAmplification             |
| sdeB         | C24 |       |       |      | CurveFitFailed              |
| spcN-01      | C24 |       |       |      | NoAmplification             |
| speA         | C24 |       |       |      | NoAmplification             |
| str          | C24 |       |       |      | NoAmplification             |
| strA         | C24 |       |       |      | NoAmplification             |
| strB         | C24 | 28.34 | 83.86 | 1.94 |                             |
| sul1         | C24 |       |       |      | NoAmplification             |
| sul2         | C24 |       |       |      | BadR2, LowEfficiency, CtIs5 |
| sulA/foIP-01 | C24 | 24.84 | 81.67 | 1.96 |                             |
| sulA/foIP-03 | C24 | 24.4  | 83.92 | 1.98 |                             |
| tet(32)      | C24 | 25.44 | 81.26 | 1.98 |                             |
| tet(34)      | C24 | 30.28 | 75.85 | 1.99 |                             |
| tet(35)      | C24 |       |       |      | NoAmplification             |
| tet(36)-A    | C24 |       |       |      | CurveFitFailed              |
| tet(36)-B    | C24 |       |       |      | NoAmplification             |
| tet(37)      | C24 | 24.75 | 76.52 | 1.97 |                             |
| tetA-01      | C24 | 32.63 | 85.06 | 1.95 |                             |
| tetA-02      | C24 | 33.85 | 85.71 | 1.85 | MultipleMeltPeaks           |
| tetB-01      | C24 | 27.32 | 86.28 | 1.95 |                             |
| tetB-02      | C24 | 26.8  | 79.65 | 2.01 |                             |
| tetC-01      | C24 | 26.73 | 75.25 | 2.01 |                             |
| tetC-02      | C24 | 27.3  | 76.06 | 2.07 |                             |
| tetD-01      | C24 |       |       |      | NoAmplification             |
| tetD-02      | C24 |       |       |      | NoAmplification             |
| tetE         | C24 | 30.95 | 86.14 | 1.94 |                             |
| tetG-01      | C24 | 28.61 | 89.96 | 1.93 |                             |
| tetG-02      | C24 | 32.87 | 90.21 | 1.92 |                             |
| tetH         | C24 |       |       |      | NoAmplification             |
| tetJ         | C24 |       |       |      | NoAmplification             |
| tetK         | C24 |       |       |      | NoAmplification             |
| tetL-01      | C24 |       |       |      | NoAmplification             |
| tetL-02      | C24 |       |       |      | CurveFitFailed              |
| tetM-01      | C24 | 24.79 | 76.05 | 1.99 |                             |
| tetM-02      | C24 | 24.31 | 77.63 | 2.05 |                             |
| tetO-01      | C24 | 22.47 | 76.78 | 1.96 |                             |
| tetPA        | C24 |       |       |      | NoAmplification             |
| tetPB-01     | C24 | 37.81 | 89.98 | 1.8  | MultipleMeltPeaks           |
| tetPB-02     | C24 | 33.11 | 84.81 | 1.98 |                             |
| tetPB-03     | C24 |       |       |      | NoAmplification             |
| tetPB-05     | C24 |       |       |      | NoAmplification             |
| tetQ         | C24 | 21.6  | 76.07 | 2.05 |                             |
| tetR-02      | C24 | 29.83 | 84.95 | 1.91 |                             |
| tetR-03      | C24 |       |       |      | NoAmplification             |
| tetS         | C24 | 38.31 | 85.29 | 1.78 | MultipleMeltPeaks           |

|             |     |       |       |      |                              |
|-------------|-----|-------|-------|------|------------------------------|
| tetT        | C24 |       |       |      | NoAmplification              |
| tetU-01     | C24 |       |       |      | NoAmplification              |
| tetV        | C24 |       |       |      | NoAmplification              |
| tetW-01     | C24 | 24.42 | 81.87 | 2.01 |                              |
| tetX        | C24 |       |       |      | NoAmplification              |
| tnpA-01     | C24 |       |       |      | NoAmplification              |
| tnpA-02     | C24 | 33.41 | 84.87 | 1.76 | MultipleMeltPeaks            |
| tnpA-03     | C24 | 35.18 | 77.57 | 2.05 |                              |
| tnpA-04     | C24 | 36.95 | 92.36 | 1.78 | MultipleMeltPeaks            |
| tnpA-05     | C24 |       |       |      | NoAmplification              |
| tnpA-07     | C24 |       |       |      | NoAmplification              |
| tolC-01     | C24 |       |       |      | LowEfficiency, CtIsSmall, S: |
| tolC-02     | C24 | 30.65 | 83.5  | 1.92 |                              |
| tolC-03     | C24 | 30.82 | 86.02 | 1.98 | MultipleMeltPeaks            |
| Tp614       | C24 |       |       |      | CurveFitFailed               |
| ttgA        | C24 | 35.23 | 79.52 | 1.9  |                              |
| ttgB        | C24 | 40.79 | 61.22 | 1.72 | MultipleMeltPeaks            |
| vanA        | C24 |       |       |      | NoAmplification              |
| vanB-01     | C24 | 34.7  | 84.31 | 1.83 |                              |
| vanC-01     | C24 | 40.41 | 72.47 | 1.83 |                              |
| vanC-02     | C24 |       |       |      | NoAmplification              |
| vanC-03     | C24 | 28.76 | 86.49 | 1.93 |                              |
| vanC1       | C24 |       |       |      | NoAmplification              |
| vanC2/vanC3 | C24 | 36.14 | 84.04 | 1.85 |                              |
| vanG        | C24 |       |       |      | NoAmplification              |
| vanHB       | C24 | 33.55 | 86.36 | 1.88 |                              |
| vanHD       | C24 | 39.88 | 81.89 | 1.69 | MultipleMeltPeaks            |
| vanRA-01    | C24 |       |       |      | NoAmplification              |
| vanRA-02    | C24 |       |       |      | NoAmplification              |
| vanRB       | C24 | 37.22 | 87.01 | 1.82 |                              |
| vanRC       | C24 |       |       |      | NoAmplification              |
| vanRC4      | C24 |       |       |      | NoAmplification              |
| vanRD       | C24 |       |       |      | NoAmplification              |
| vanSA       | C24 |       |       |      | NoAmplification              |
| vanSB       | C24 | 29.31 | 74.23 | 1.9  |                              |
| vanSC-01    | C24 |       |       |      | NoAmplification              |
| vanSC-02    | C24 |       |       |      | NoAmplification              |
| vanTC-01    | C24 |       |       |      | NoAmplification              |
| vanTC-02    | C24 |       |       |      | NoAmplification              |
| vanTE       | C24 |       |       |      | NoAmplification              |
| vanTG       | C24 |       |       |      | NoAmplification              |
| vanWB       | C24 |       |       |      | NoAmplification              |
| vanWG       | C24 |       |       |      | LowEfficiency, CtIsSmall, C: |
| vanXA       | C24 |       |       |      | NoAmplification              |
| vanXB       | C24 |       |       |      | NoAmplification              |
| vanXD       | C24 | 30.32 | 75.86 | 2.03 |                              |

|              |     |       |       |      |                   |
|--------------|-----|-------|-------|------|-------------------|
| vanYB        | C24 | 32.3  | 82.8  | 1.98 |                   |
| vanYD-01     | C24 | 31.24 | 81.89 | 1.76 |                   |
| vanYD-02     | C24 | 36.97 | 75.93 | 1.89 |                   |
| vatB-01      | C24 |       |       |      | CurveFitFailed    |
| vatB-02      | C24 | 37.1  | 80.8  | 1.8  |                   |
| vatC-01      | C24 |       |       |      | NoAmplification   |
| vatC-02      | C24 | 37.35 | 83.23 | 1.81 |                   |
| vatE-01      | C24 | 29.92 | 75.74 | 2.05 |                   |
| vatE-02      | C24 |       |       |      | NoAmplification   |
| vgaA-01      | C24 |       |       |      | NoAmplification   |
| vgaA-02      | C24 |       |       |      | CurveFitFailed    |
| vgb-01       | C24 |       |       |      | NoAmplification   |
| vgbB-01      | C24 |       |       |      | NoAmplification   |
| vgbB-02      | C24 |       |       |      | NoAmplification   |
| yceE/mdtG-0  | C24 | 36.2  | 77.62 | 1.88 |                   |
| yceE/mdtG-0  | C24 | 36.58 | 81.06 | 1.82 |                   |
| yceL/mdtH-0  | C24 | 33.26 | 84.83 | 1.93 |                   |
| yceL/mdtH-0  | C24 |       |       |      | NoAmplification   |
| yceL/mdtH-0  | C24 | 39.11 | 88.93 | 1.65 | MultipleMeltPeaks |
| yidY/mdtL-01 | C24 | 32.58 | 82.42 | 1.99 | MultipleMeltPeaks |
| yidY/mdtL-02 | C24 | 37.52 | 82.03 | 1.82 |                   |



| Assay          | Sample | Ct | Tm    | Efficiency | Flags                  |
|----------------|--------|----|-------|------------|------------------------|
| 16S rRNA       | C25    |    | 21.45 | 82.02      | 2.01                   |
| aac            | C25    |    | 30.77 | 82.87      | 1.84                   |
| aac(6')-Ib(akz | C25    |    |       |            | NoAmplification        |
| aac(6')-Ib(akz | C25    |    | 31.37 | 82.57      | 1.98 MultipleMeltPeaks |
| aac(6')-Ib(akz | C25    |    | 34.35 | 79.41      | 1.87 MultipleMeltPeaks |
| aac(6')-II     | C25    |    | 36.26 | 80.82      | 1.6 MultipleMeltPeaks  |
| aac(6')I1      | C25    |    |       |            | NoAmplification        |
| aacA/aphD      | C25    |    |       |            | NoAmplification        |
| aacC           | C25    |    | 31.3  | 85.45      | 1.85                   |
| aacC1          | C25    |    |       |            | NoAmplification        |
| aacC2          | C25    |    |       |            | NoAmplification        |
| aacC4          | C25    |    |       |            | NoAmplification        |
| aadA-01        | C25    |    |       |            | NoAmplification        |
| aadA-02        | C25    |    |       |            | NoAmplification        |
| aadA-1-01      | C25    |    | 31.25 | 75.14      | 1.96                   |
| aadA-1-02      | C25    |    |       |            | NoAmplification        |
| aadA1          | C25    |    | 35.58 | 74.92      | 1.97 MultipleMeltPeaks |
| aadA2-01       | C25    |    |       |            | NoAmplification        |
| aadA2-02       | C25    |    | 35.5  | 74.89      | 1.94                   |
| aadA2-03       | C25    |    |       |            | NoAmplification        |
| aadA5-01       | C25    |    |       |            | CurveFitFailed         |
| aadA5-02       | C25    |    | 30.81 | 83.71      | 1.94 MultipleMeltPeaks |
| aadA9-01       | C25    |    | 33.59 | 89.5       | 1.89                   |
| aadA9-02       | C25    |    | 32.86 | 73.37      | 2.06                   |
| aadD           | C25    |    |       |            | NoAmplification        |
| aadE           | C25    |    |       |            | NoAmplification        |
| acrA-01        | C25    |    | 32.8  | 88.74      | 1.91                   |
| acrA-02        | C25    |    |       |            | NoAmplification        |
| acrA-03        | C25    |    | 37.06 | 80.82      | 1.82                   |
| acrA-04        | C25    |    | 30.21 | 80.64      | 1.97                   |
| acrA-05        | C25    |    | 31.64 | 79.88      | 1.94 MultipleMeltPeaks |
| acrB-01        | C25    |    |       |            | NoAmplification        |
| acrF           | C25    |    | 29.86 | 82.9       | 1.73                   |
| acrR-01        | C25    |    | 37.53 | 81.38      | 1.82                   |
| acrR-02        | C25    |    | 32.77 | 86.78      | 1.89                   |
| Actin          | C25    |    | 21.66 | 86.8       | 1.97                   |
| adeA           | C25    |    |       |            | CurveFitFailed         |
| ampC-01        | C25    |    | 31.89 | 85.43      | 1.97 MultipleMeltPeaks |
| ampC-02        | C25    |    |       |            | NoAmplification        |
| ampC-04        | C25    |    | 32.39 | 78.6       | 1.85                   |
| ampC-05        | C25    |    |       |            | NoAmplification        |
| ampC-06        | C25    |    | 37.62 | 83.33      | 1.76 MultipleMeltPeaks |
| ampC-07        | C25    |    | 33.93 | 88.27      | 1.85                   |
| ampC-09        | C25    |    |       |            | NoAmplification        |
| ampC/blaDH     | C25    |    | 30.76 | 86.71      | 1.92 MultipleMeltPeaks |

|                          |     |       |       |      |                   |
|--------------------------|-----|-------|-------|------|-------------------|
| aph                      | C25 |       |       |      | NoAmplification   |
| aph(2')-Id-01            | C25 |       |       |      | NoAmplification   |
| aph(2')-Id-02            | C25 |       |       |      | NoAmplification   |
| aph6ia                   | C25 |       |       |      | NoAmplification   |
| aphA1(aka k <sub>z</sub> | C25 |       |       |      | NoAmplification   |
| bacA-01                  | C25 |       |       |      | NoAmplification   |
| bacA-02                  | C25 |       |       |      | NoAmplification   |
| BETA-globin              | C25 | 22.73 | 84.12 | 2    |                   |
| bla-ACC-1                | C25 |       |       |      | NoAmplification   |
| bla-L1                   | C25 | 29.14 | 85.68 | 1.93 |                   |
| bla1                     | C25 |       |       |      | NoAmplification   |
| blaCMY                   | C25 |       |       |      | NoAmplification   |
| blaCMY2-01               | C25 |       |       |      | NoAmplification   |
| blaCMY2-02               | C25 | 30.11 | 85.45 | 1.99 | MultipleMeltPeaks |
| blaCTX-M-01              | C25 | 34.77 | 86.5  | 1.99 |                   |
| blaCTX-M-02              | C25 |       |       |      | NoAmplification   |
| blaCTX-M-03              | C25 |       |       |      | NoAmplification   |
| blaCTX-M-04              | C25 |       |       |      | NoAmplification   |
| blaCTX-M-05              | C25 | 32.14 | 77    | 1.82 |                   |
| blaCTX-M-06              | C25 |       |       |      | NoAmplification   |
| blaGES                   | C25 |       |       |      | NoAmplification   |
| blaIMP-01                | C25 |       |       |      | NoAmplification   |
| blaIMP-02                | C25 | 35.03 | 83.54 | 1.92 |                   |
| blaMOX/blaC              | C25 | 38.79 | 82.05 | 1.76 | MultipleMeltPeaks |
| blaOCH                   | C25 |       |       |      | NoAmplification   |
| blaOKP                   | C25 |       |       |      | NoAmplification   |
| blaOXA1/blaC             | C25 |       |       |      | NoAmplification   |
| blaOXA10-01              | C25 |       |       |      | NoAmplification   |
| blaOXA10-02              | C25 |       |       |      | NoAmplification   |
| blaOXY                   | C25 |       |       |      | NoAmplification   |
| blaPAO                   | C25 |       |       |      | NoAmplification   |
| blaPER                   | C25 |       |       |      | NoAmplification   |
| blaPSE                   | C25 |       |       |      | NoAmplification   |
| blaROB                   | C25 |       |       |      | NoAmplification   |
| blaSFO                   | C25 | 32    | 82.21 | 1.97 | MultipleMeltPeaks |
| blaSHV-01                | C25 |       |       |      | NoAmplification   |
| blaSHV-02                | C25 |       |       |      | NoAmplification   |
| blaTEM                   | C25 | 28.32 | 79.4  | 1.88 |                   |
| blaTLA                   | C25 |       |       |      | NoAmplification   |
| blaVEB                   | C25 |       |       |      | NoAmplification   |
| blaVIM                   | C25 |       |       |      | NoAmplification   |
| blaZ                     | C25 |       |       |      | NoAmplification   |
| carB                     | C25 |       |       |      | NoAmplification   |
| catA1                    | C25 |       |       |      | NoAmplification   |
| catB3                    | C25 | 33.62 | 87.54 | 1.88 |                   |
| catB8                    | C25 | 26.22 | 81.62 | 1.94 | MultipleMeltPeaks |

|            |     |       |       |      |                              |
|------------|-----|-------|-------|------|------------------------------|
| ceoA       | C25 | 28.9  | 82.3  | 1.95 |                              |
| cepA       | C25 |       |       |      | NoAmplification              |
| cfiA       | C25 | 34.9  | 87.51 | 1.97 | MultipleMeltPeaks            |
| cfr        | C25 |       |       |      | NoAmplification              |
| cfxA       | C25 | 27.46 | 77.43 | 1.93 |                              |
| cmeA       | C25 |       |       |      | NoAmplification              |
| cmlA1-01   | C25 | 41.65 | 80.37 | 1.64 | MultipleMeltPeaks            |
| cmlA1-02   | C25 |       |       |      | NoAmplification              |
| cmr        | C25 |       |       |      | NoAmplification              |
| cmx(A)     | C25 | 29.24 | 84.47 | 1.85 |                              |
| cphA-01    | C25 |       |       |      | NoAmplification              |
| cphA-02    | C25 | 36.9  | 76.1  | 1.82 | MultipleMeltPeaks            |
| dfrA1      | C25 |       |       |      | NoAmplification              |
| dfrA12     | C25 |       |       |      | NoAmplification              |
| emrD       | C25 | 31.76 | 79.47 | 1.97 |                              |
| ereA       | C25 | 31.97 | 82.72 | 1.97 |                              |
| ereB       | C25 |       |       |      | NoAmplification              |
| erm(34)    | C25 |       |       |      | NoAmplification              |
| erm(35)    | C25 |       |       |      | NoAmplification              |
| erm(36)    | C25 | 35.24 | 78.47 | 2.02 |                              |
| ermA       | C25 |       |       |      | NoAmplification              |
| ermA/ermTR | C25 |       |       |      | NoAmplification              |
| ermB       | C25 | 28.59 | 74.87 | 2.02 |                              |
| ermC       | C25 |       |       |      | NoAmplification              |
| ermF       | C25 |       |       |      | NoAmplification              |
| ermJ/ermD  | C25 |       |       |      | NoAmplification              |
| ermK-01    | C25 |       |       |      | CurveFitFailed               |
| ermK-02    | C25 |       |       |      | NoAmplification              |
| ermT-01    | C25 |       |       |      | NoAmplification              |
| ermT-02    | C25 |       |       |      | NoAmplification              |
| ermX       | C25 | 36.37 | 84.9  | 1.8  |                              |
| ermY       | C25 |       |       |      | NoAmplification              |
| fabK       | C25 | 26.96 | 79.35 | 2.05 |                              |
| floR       | C25 |       |       |      | NoAmplification              |
| folA       | C25 |       |       |      | NoAmplification              |
| fosB       | C25 |       |       |      | LowEfficiency, CtIsSmall, S: |
| fosX       | C25 |       |       |      | NoAmplification              |
| fox5       | C25 | 29.61 | 86.03 | 1.83 |                              |
| imiR       | C25 |       |       |      | NoAmplification              |
| ImrA-01    | C25 |       |       |      | NoAmplification              |
| intl       | C25 | 32.24 | 84.83 | 1.92 |                              |
| intl1      | C25 | 23.34 | 83.39 | 1.94 | MultipleMeltPeaks            |
| IS613      | C25 | 27.45 | 79.68 | 2.03 |                              |
| lnuA-01    | C25 |       |       |      | NoAmplification              |
| lnuB-01    | C25 |       |       |      | NoAmplification              |
| lnuB-02    | C25 |       |       |      | CurveFitFailed               |

|               |     |       |       |      |                   |
|---------------|-----|-------|-------|------|-------------------|
| lnuC          | C25 |       |       |      | CurveFitFailed    |
| marR-01       | C25 | 34.98 | 86.41 | 1.86 |                   |
| matA/mel      | C25 | 25.84 | 77.57 | 2.02 |                   |
| mdet1         | C25 |       |       |      | NoAmplification   |
| mdtA          | C25 | 38.19 | 82.51 | 1.78 |                   |
| mdtE/yhiU     | C25 |       |       |      | NoAmplification   |
| mecA          | C25 |       |       |      | NoAmplification   |
| mefA          | C25 | 24.5  | 80.62 | 1.96 |                   |
| mepA          | C25 | 35.37 | 89.26 | 1.89 | MultipleMeltPeaks |
| mexA          | C25 |       |       |      | NoAmplification   |
| mexD          | C25 | 30.88 | 80.4  | 2.01 |                   |
| mexE          | C25 |       |       |      | NoAmplification   |
| mexF          | C25 | 30.94 | 80.93 | 1.73 | MultipleMeltPeaks |
| mphA-01       | C25 | 30.01 | 86.83 | 1.98 |                   |
| mphA-02       | C25 | 31.39 | 84.94 | 1.83 |                   |
| mphB          | C25 |       |       |      | CurveFitFailed    |
| mphC          | C25 |       |       |      | NoAmplification   |
| msrA-01       | C25 |       |       |      | NoAmplification   |
| msrC-01       | C25 |       |       |      | NoAmplification   |
| mtrC-01       | C25 |       |       |      | NoAmplification   |
| mtrC-02       | C25 | 32    | 84.73 | 1.99 |                   |
| mtrD-02       | C25 | 30.17 | 81.19 | 1.88 |                   |
| mtrD-03       | C25 |       |       |      | NoAmplification   |
| NDM1          | C25 |       |       |      | NoAmplification   |
| nimE          | C25 |       |       |      | NoAmplification   |
| nisB          | C25 |       |       |      | NoAmplification   |
| oleC          | C25 | 35.26 | 85.3  | 1.85 |                   |
| oprD          | C25 | 31    | 81.3  | 2    | MultipleMeltPeaks |
| oprJ          | C25 |       |       |      | NoAmplification   |
| pbp           | C25 |       |       |      | NoAmplification   |
| pbp2x         | C25 |       |       |      | NoAmplification   |
| Pbp5          | C25 |       |       |      | NoAmplification   |
| penA          | C25 |       |       |      | NoAmplification   |
| pikR1         | C25 | 40.08 | 79.28 | 1.67 | MultipleMeltPeaks |
| pikR2         | C25 | 32.31 | 84.4  | 2.03 |                   |
| pmrA          | C25 |       |       |      | NoAmplification   |
| pncA          | C25 | 31.34 | 79.24 | 1.82 |                   |
| putative mulI | C25 |       |       |      | NoAmplification   |
| qac           | C25 |       |       |      | NoAmplification   |
| qacA          | C25 |       |       |      | NoAmplification   |
| qacA/qacB     | C25 |       |       |      | NoAmplification   |
| qacEdelta1-0  | C25 |       |       |      | NoAmplification   |
| qacEdelta1-0  | C25 | 35.68 | 75.08 | 1.95 | MultipleMeltPeaks |
| qacH-01       | C25 | 34.77 | 86.62 | 1.94 |                   |
| qacH-02       | C25 | 35.25 | 83.51 | 1.66 | MultipleMeltPeaks |
| qnrA          | C25 |       |       |      | NoAmplification   |

|              |     |       |       |      |                   |
|--------------|-----|-------|-------|------|-------------------|
| rarD-02      | C25 |       |       |      | NoAmplification   |
| sat4         | C25 |       |       |      | NoAmplification   |
| sdeB         | C25 |       |       |      | NoAmplification   |
| spcN-01      | C25 | 38.61 | 87.02 | 1.77 | MultipleMeltPeaks |
| speA         | C25 |       |       |      | NoAmplification   |
| str          | C25 |       |       |      | NoAmplification   |
| strA         | C25 |       |       |      | NoAmplification   |
| strB         | C25 | 27.24 | 83.9  | 1.93 |                   |
| sul1         | C25 |       |       |      | NoAmplification   |
| sul2         | C25 |       |       |      | NoAmplification   |
| sulA/foIP-01 | C25 | 29.06 | 80.34 | 1.99 |                   |
| sulA/foIP-03 | C25 | 28.51 | 84.37 | 1.94 |                   |
| tet(32)      | C25 |       |       |      | NoAmplification   |
| tet(34)      | C25 | 30.62 | 75.81 | 2    |                   |
| tet(35)      | C25 |       |       |      | NoAmplification   |
| tet(36)-A    | C25 |       |       |      | NoAmplification   |
| tet(36)-B    | C25 |       |       |      | NoAmplification   |
| tet(37)      | C25 | 28.63 | 75.85 | 1.97 | MultipleMeltPeaks |
| tetA-01      | C25 | 35.03 | 85.03 | 1.92 |                   |
| tetA-02      | C25 | 32.96 | 83.63 | 1.94 |                   |
| tetB-01      | C25 | 27.01 | 86.25 | 1.94 |                   |
| tetB-02      | C25 |       |       |      | NoAmplification   |
| tetC-01      | C25 |       |       |      | NoAmplification   |
| tetC-02      | C25 |       |       |      | NoAmplification   |
| tetD-01      | C25 |       |       |      | NoAmplification   |
| tetD-02      | C25 |       |       |      | NoAmplification   |
| tetE         | C25 |       |       |      | NoAmplification   |
| tetG-01      | C25 | 32.65 | 85.07 | 2.04 |                   |
| tetG-02      | C25 |       |       |      | NoAmplification   |
| tetH         | C25 |       |       |      | NoAmplification   |
| tetJ         | C25 |       |       |      | NoAmplification   |
| tetK         | C25 |       |       |      | NoAmplification   |
| tetL-01      | C25 |       |       |      | NoAmplification   |
| tetL-02      | C25 |       |       |      | NoAmplification   |
| tetM-01      | C25 | 26.64 | 75.88 | 2.01 |                   |
| tetM-02      | C25 |       |       |      | NoAmplification   |
| tetO-01      | C25 | 26.55 | 76.73 | 2    |                   |
| tetPA        | C25 |       |       |      | NoAmplification   |
| tetPB-01     | C25 |       |       |      | NoAmplification   |
| tetPB-02     | C25 | 30.38 | 84.8  | 1.9  |                   |
| tetPB-03     | C25 |       |       |      | NoAmplification   |
| tetPB-05     | C25 |       |       |      | NoAmplification   |
| tetQ         | C25 |       |       |      | NoAmplification   |
| tetR-02      | C25 | 32.94 | 81.95 | 1.93 | MultipleMeltPeaks |
| tetR-03      | C25 | 28.81 | 76.07 | 1.99 |                   |
| tetS         | C25 | 35.32 | 75.93 | 2.1  |                   |

|             |     |       |       |      |                   |
|-------------|-----|-------|-------|------|-------------------|
| tetT        | C25 |       |       |      | NoAmplification   |
| tetU-01     | C25 |       |       |      | NoAmplification   |
| tetV        | C25 |       |       |      | NoAmplification   |
| tetW-01     | C25 | 28.14 | 81.64 | 1.98 |                   |
| tetX        | C25 |       |       |      | NoAmplification   |
| tnpA-01     | C25 |       |       |      | NoAmplification   |
| tnpA-02     | C25 | 27.2  | 85.02 | 1.85 |                   |
| tnpA-03     | C25 | 26.54 | 77.29 | 2.05 |                   |
| tnpA-04     | C25 |       |       |      | NoAmplification   |
| tnpA-05     | C25 |       |       |      | NoAmplification   |
| tnpA-07     | C25 |       |       |      | NoAmplification   |
| tolC-01     | C25 |       |       |      | NoAmplification   |
| tolC-02     | C25 | 31.75 | 83.58 | 1.95 | MultipleMeltPeaks |
| tolC-03     | C25 | 31.42 | 86.1  | 1.9  |                   |
| Tp614       | C25 |       |       |      | CurveFitFailed    |
| ttgA        | C25 |       |       |      | NoAmplification   |
| ttgB        | C25 | 36.46 | 91.49 | 1.82 |                   |
| vanA        | C25 |       |       |      | NoAmplification   |
| vanB-01     | C25 | 34.66 | 83.64 | 1.99 | MultipleMeltPeaks |
| vanC-01     | C25 |       |       |      | NoAmplification   |
| vanC-02     | C25 |       |       |      | NoAmplification   |
| vanC-03     | C25 | 28.81 | 86.72 | 1.93 |                   |
| vanC1       | C25 |       |       |      | NoAmplification   |
| vanC2/vanC3 | C25 | 35.39 | 82.88 | 1.96 |                   |
| vanG        | C25 |       |       |      | NoAmplification   |
| vanHB       | C25 | 33.73 | 78.89 | 1.94 |                   |
| vanHD       | C25 |       |       |      | NoAmplification   |
| vanRA-01    | C25 |       |       |      | NoAmplification   |
| vanRA-02    | C25 |       |       |      | NoAmplification   |
| vanRB       | C25 |       |       |      | NoAmplification   |
| vanRC       | C25 |       |       |      | NoAmplification   |
| vanRC4      | C25 |       |       |      | NoAmplification   |
| vanRD       | C25 |       |       |      | NoAmplification   |
| vanSA       | C25 |       |       |      | NoAmplification   |
| vanSB       | C25 | 33.69 | 73.8  | 2.01 |                   |
| vanSC-01    | C25 | 37.82 | 84.04 | 1.84 |                   |
| vanSC-02    | C25 |       |       |      | NoAmplification   |
| vanTC-01    | C25 |       |       |      | NoAmplification   |
| vanTC-02    | C25 |       |       |      | NoAmplification   |
| vanTE       | C25 |       |       |      | NoAmplification   |
| vanTG       | C25 |       |       |      | NoAmplification   |
| vanWB       | C25 |       |       |      | NoAmplification   |
| vanWG       | C25 | 31.78 | 75.02 | 1.99 |                   |
| vanXA       | C25 |       |       |      | NoAmplification   |
| vanXB       | C25 |       |       |      | NoAmplification   |
| vanXD       | C25 | 30.33 | 75.4  | 2.04 |                   |

|              |     |       |       |      |                   |
|--------------|-----|-------|-------|------|-------------------|
| vanYB        | C25 | 36.12 | 82.61 | 1.84 | MultipleMeltPeaks |
| vanYD-01     | C25 | 36.3  | 82.61 | 1.79 | MultipleMeltPeaks |
| vanYD-02     | C25 |       |       |      | NoAmplification   |
| vatB-01      | C25 |       |       |      | NoAmplification   |
| vatB-02      | C25 |       |       |      | NoAmplification   |
| vatC-01      | C25 | 37.7  | 74.44 | 1.83 |                   |
| vatC-02      | C25 | 36.07 | 86.53 | 1.83 |                   |
| vatE-01      | C25 | 31.93 | 76.62 | 2.1  |                   |
| vatE-02      | C25 |       |       |      | NoAmplification   |
| vgaA-01      | C25 |       |       |      | NoAmplification   |
| vgaA-02      | C25 |       |       |      | NoAmplification   |
| vgb-01       | C25 |       |       |      | NoAmplification   |
| vgbB-01      | C25 |       |       |      | NoAmplification   |
| vgbB-02      | C25 |       |       |      | NoAmplification   |
| yceE/mdtG-0  | C25 | 38.03 | 77.82 | 1.78 |                   |
| yceE/mdtG-0  | C25 | 36.95 | 81.87 | 1.79 |                   |
| yceL/mdtH-0  | C25 | 33.11 | 84.51 | 1.94 | MultipleMeltPeaks |
| yceL/mdtH-0  | C25 |       |       |      | NoAmplification   |
| yceL/mdtH-0  | C25 | 38.08 | 81.5  | 1.83 |                   |
| yidY/mdtL-01 | C25 | 33.66 | 82.31 | 1.92 | MultipleMeltPeaks |
| yidY/mdtL-02 | C25 |       |       |      | NoAmplification   |

| Assay          | Sample | Ct | Tm    | Efficiency | Flags                       |
|----------------|--------|----|-------|------------|-----------------------------|
| 16S rRNA       | C26    |    | 18.66 | 82.19      | 1.98                        |
| aac            | C26    |    | 29.98 | 83.54      | 1.58 MultipleMeltPeaks      |
| aac(6')-Ib(akz | C26    |    |       |            | BadR2, CtIsLarge, CurveFitf |
| aac(6')-Ib(akz | C26    |    | 30.71 | 84.22      | 1.96 MultipleMeltPeaks      |
| aac(6')-Ib(akz | C26    |    | 35.33 | 86.11      | 1.79                        |
| aac(6')-II     | C26    |    | 34.9  | 80.64      | 1.65 MultipleMeltPeaks      |
| aac(6')I1      | C26    |    | 34.68 | 88.51      | 1.85                        |
| aacA/aphD      | C26    |    |       |            | NoAmplification             |
| aacC           | C26    |    | 29.81 | 92.1       | 1.87 MultipleMeltPeaks      |
| aacC1          | C26    |    |       |            | NoAmplification             |
| aacC2          | C26    |    | 36.37 | 83.82      | 1.85                        |
| aacC4          | C26    |    |       |            | NoAmplification             |
| aadA-01        | C26    |    |       |            | NoAmplification             |
| aadA-02        | C26    |    | 36.68 | 80.48      | 1.85                        |
| aadA-1-01      | C26    |    |       |            | NoAmplification             |
| aadA-1-02      | C26    |    |       |            | NoAmplification             |
| aadA1          | C26    |    | 32.54 | 84.86      | 2.07                        |
| aadA2-01       | C26    |    |       |            | NoAmplification             |
| aadA2-02       | C26    |    | 34.63 | 75.05      | 2.02                        |
| aadA2-03       | C26    |    |       |            | NoAmplification             |
| aadA5-01       | C26    |    | 38.93 | 76.37      | 1.77 MultipleMeltPeaks      |
| aadA5-02       | C26    |    | 32.91 | 78.08      | 1.93 MultipleMeltPeaks      |
| aadA9-01       | C26    |    | 35.25 | 88.23      | 1.84 MultipleMeltPeaks      |
| aadA9-02       | C26    |    | 44.51 | 62.56      | 1.67 MultipleMeltPeaks      |
| aadD           | C26    |    |       |            | NoAmplification             |
| aadE           | C26    |    |       |            | NoAmplification             |
| acrA-01        | C26    |    | 33.79 | 88.75      | 1.91                        |
| acrA-02        | C26    |    |       |            | CtIsLarge, CurveFitFailed   |
| acrA-03        | C26    |    | 39.73 | 66.78      | 1.6 MultipleMeltPeaks       |
| acrA-04        | C26    |    | 31.55 | 80.8       | 2 MultipleMeltPeaks         |
| acrA-05        | C26    |    | 30.22 | 88.2       | 1.96                        |
| acrB-01        | C26    |    |       |            | NoAmplification             |
| acrF           | C26    |    | 27.25 | 84.1       | 1.81 MultipleMeltPeaks      |
| acrR-01        | C26    |    | 36.63 | 81.34      | 1.84 MultipleMeltPeaks      |
| acrR-02        | C26    |    | 33.72 | 82.88      | 1.9 MultipleMeltPeaks       |
| Actin          | C26    |    | 21.18 | 87.12      | 1.95                        |
| adeA           | C26    |    | 32.97 | 83.64      | 1.96                        |
| ampC-01        | C26    |    | 29.14 | 85.57      | 1.99                        |
| ampC-02        | C26    |    | 43.62 | 62.05      | 1.7 MultipleMeltPeaks       |
| ampC-04        | C26    |    | 34.78 | 77.83      | 1.74                        |
| ampC-05        | C26    |    |       |            | NoAmplification             |
| ampC-06        | C26    |    |       |            | CtIsLarge, CurveFitFailed   |
| ampC-07        | C26    |    | 32.89 | 88.26      | 1.86                        |
| ampC-09        | C26    |    |       |            | NoAmplification             |
| ampC/blaDH     | C26    |    | 28.32 | 85.34      | 1.98                        |



|                          |     |       |       |      |                           |
|--------------------------|-----|-------|-------|------|---------------------------|
| aph                      | C26 |       |       |      | NoAmplification           |
| aph(2')-Id-01            | C26 |       |       |      | NoAmplification           |
| aph(2')-Id-02            | C26 |       |       |      | NoAmplification           |
| aph6ia                   | C26 |       |       |      | NoAmplification           |
| aphA1(aka k <sub>z</sub> | C26 |       |       |      | NoAmplification           |
| bacA-01                  | C26 |       |       |      | NoAmplification           |
| bacA-02                  | C26 | 35.87 | 87.9  | 1.75 |                           |
| BETA-globin              | C26 | 22.44 | 84.05 | 2    |                           |
| bla-ACC-1                | C26 | 37.74 | 81.62 | 1.67 | MultipleMeltPeaks         |
| bla-L1                   | C26 | 28.95 | 85.16 | 1.98 |                           |
| bla1                     | C26 |       |       |      | CtIsLarge, CurveFitFailed |
| blaCMY                   | C26 | 35.48 | 76.54 | 1.89 |                           |
| blaCMY2-01               | C26 |       |       |      | CtIsLarge, CurveFitFailed |
| blaCMY2-02               | C26 | 29.92 | 85.48 | 1.96 |                           |
| blaCTX-M-01              | C26 |       |       |      | NoAmplification           |
| blaCTX-M-02              | C26 |       |       |      | CurveFitFailed            |
| blaCTX-M-03              | C26 |       |       |      | NoAmplification           |
| blaCTX-M-04              | C26 | 34.17 | 88.39 | 2.04 | MultipleMeltPeaks         |
| blaCTX-M-05              | C26 | 31.22 | 82.84 | 1.82 |                           |
| blaCTX-M-06              | C26 |       |       |      | NoAmplification           |
| blaGES                   | C26 |       |       |      | NoAmplification           |
| blaIMP-01                | C26 |       |       |      | NoAmplification           |
| blaIMP-02                | C26 |       |       |      | CurveFitFailed            |
| blaMOX/blaC              | C26 | 35.51 | 80.78 | 1.94 | MultipleMeltPeaks         |
| blaOCH                   | C26 |       |       |      | NoAmplification           |
| blaOKP                   | C26 |       |       |      | NoAmplification           |
| blaOXA1/blaC             | C26 |       |       |      | NoAmplification           |
| blaOXA10-01              | C26 |       |       |      | NoAmplification           |
| blaOXA10-02              | C26 |       |       |      | NoAmplification           |
| blaOXY                   | C26 | 37.22 | 85.74 | 1.64 | MultipleMeltPeaks         |
| blaPAO                   | C26 |       |       |      | NoAmplification           |
| blaPER                   | C26 |       |       |      | NoAmplification           |
| blaPSE                   | C26 |       |       |      | NoAmplification           |
| blaROB                   | C26 | 37.7  | 89.86 | 1.75 | MultipleMeltPeaks         |
| blaSFO                   | C26 | 33.07 | 82.29 | 1.99 |                           |
| blaSHV-01                | C26 |       |       |      | NoAmplification           |
| blaSHV-02                | C26 | 39.04 | 81.24 | 1.72 | MultipleMeltPeaks         |
| blaTEM                   | C26 | 24.55 | 79.19 | 1.95 |                           |
| blaTLA                   | C26 |       |       |      | NoAmplification           |
| blaVEB                   | C26 |       |       |      | NoAmplification           |
| blaVIM                   | C26 |       |       |      | NoAmplification           |
| blaZ                     | C26 |       |       |      | NoAmplification           |
| carB                     | C26 | 33.75 | 87.86 | 1.86 |                           |
| catA1                    | C26 |       |       |      | NoAmplification           |
| catB3                    | C26 | 35.28 | 87.37 | 1.86 | MultipleMeltPeaks         |
| catB8                    | C26 | 28.21 | 84.24 | 1.99 | MultipleMeltPeaks         |

|            |     |       |       |      |                                     |
|------------|-----|-------|-------|------|-------------------------------------|
| ceoA       | C26 | 27.2  | 82.07 | 1.98 | MultipleMeltPeaks                   |
| cepA       | C26 |       |       |      | NoAmplification                     |
| cfiA       | C26 | 33.47 | 83.59 | 1.69 |                                     |
| cfr        | C26 |       |       |      | NoAmplification                     |
| cfxA       | C26 | 22.34 | 77.57 | 1.91 |                                     |
| cmeA       | C26 | 37.26 | 84.89 | 1.75 | MultipleMeltPeaks                   |
| cmlA1-01   | C26 |       |       |      | NoAmplification                     |
| cmlA1-02   | C26 |       |       |      | NoAmplification                     |
| cmr        | C26 | 36.19 | 78.69 | 1.85 |                                     |
| cmx(A)     | C26 | 27    | 86.7  | 1.95 |                                     |
| cphA-01    | C26 | 34.38 | 85.42 | 1.95 |                                     |
| cphA-02    | C26 | 32.98 | 78.83 | 1.94 |                                     |
| dfrA1      | C26 |       |       |      | NoAmplification                     |
| dfrA12     | C26 |       |       |      | NoAmplification                     |
| emrD       | C26 | 36.84 | 76.44 | 1.72 | MultipleMeltPeaks<br>CurveFitFailed |
| ereA       | C26 |       |       |      |                                     |
| ereB       | C26 | 37.86 | 85.81 | 1.75 | MultipleMeltPeaks                   |
| erm(34)    | C26 |       |       |      | NoAmplification                     |
| erm(35)    | C26 | 41.29 | 62.02 | 1.7  | MultipleMeltPeaks                   |
| erm(36)    | C26 | 37.12 | 83.87 | 1.76 | MultipleMeltPeaks                   |
| ermA       | C26 |       |       |      | NoAmplification                     |
| ermA/ermTR | C26 |       |       |      | NoAmplification                     |
| ermB       | C26 |       |       |      | NoAmplification                     |
| ermC       | C26 |       |       |      | NoAmplification                     |
| ermF       | C26 | 25.85 | 74.65 | 2.02 |                                     |
| ermJ/ermD  | C26 |       |       |      | NoAmplification                     |
| ermK-01    | C26 | 36.48 | 80.18 | 1.9  |                                     |
| ermK-02    | C26 | 36.8  | 75.61 | 1.88 |                                     |
| ermT-01    | C26 |       |       |      | NoAmplification                     |
| ermT-02    | C26 |       |       |      | NoAmplification                     |
| ermX       | C26 | 35.41 | 86.59 | 1.71 |                                     |
| ermY       | C26 |       |       |      | NoAmplification                     |
| fabK       | C26 | 26.11 | 79.42 | 2.11 |                                     |
| floR       | C26 | 38.32 | 77.67 | 1.88 |                                     |
| folA       | C26 |       |       |      | NoAmplification                     |
| fosB       | C26 |       |       |      | LowEfficiency, CtIsSmall, S:        |
| fosX       | C26 |       |       |      | NoAmplification                     |
| fox5       | C26 | 33.02 | 86.3  | 1.53 |                                     |
| imiR       | C26 |       |       |      | NoAmplification                     |
| ImrA-01    | C26 |       |       |      | NoAmplification                     |
| intl       | C26 | 30.06 | 84.5  | 1.94 | MultipleMeltPeaks                   |
| intl1      | C26 | 20.98 | 86.89 | 1.9  | MultipleMeltPeaks                   |
| IS613      | C26 |       |       |      | NoAmplification                     |
| lnuA-01    | C26 |       |       |      | NoAmplification                     |
| lnuB-01    | C26 |       |       |      | NoAmplification                     |
| lnuB-02    | C26 |       |       |      | CurveFitFailed                      |

|               |     |       |       |      |                          |
|---------------|-----|-------|-------|------|--------------------------|
| lnuC          | C26 | 35.64 | 83.68 | 1.71 | MultipleMeltPeaks        |
| marR-01       | C26 | 43.23 | 80.23 | 1.57 | MultipleMeltPeaks        |
| matA/mel      | C26 | 23.04 | 77.63 | 2.05 |                          |
| mdetI1        | C26 |       |       |      | NoAmplification          |
| mdtA          | C26 | 35.51 | 82.41 | 1.75 | MultipleMeltPeaks        |
| mdtE/yhiU     | C26 | 34.68 | 83.13 | 1.91 |                          |
| mecA          | C26 |       |       |      | NoAmplification          |
| mefA          | C26 | 22.24 | 80.48 | 2    |                          |
| mepA          | C26 | 32.48 | 85.26 | 1.93 | MultipleMeltPeaks        |
| mexA          | C26 |       |       |      | NoAmplification          |
| mexD          | C26 | 32.83 | 80.09 | 1.95 |                          |
| mexE          | C26 | 36.94 | 91.08 | 1.75 |                          |
| mexF          | C26 | 30.39 | 84.45 | 1.78 |                          |
| mphA-01       | C26 | 30.85 | 86.85 | 1.95 |                          |
| mphA-02       | C26 | 28.92 | 86.68 | 1.55 | MultipleMeltPeaks        |
| mphB          | C26 | 33.4  | 84.77 | 2.04 |                          |
| mphC          | C26 | 44.78 | 62.3  | 2.01 | BadR2, MultipleMeltPeaks |
| msrA-01       | C26 |       |       |      | NoAmplification          |
| msrC-01       | C26 |       |       |      | NoAmplification          |
| mtrC-01       | C26 |       |       |      | NoAmplification          |
| mtrC-02       | C26 | 36.55 | 84.33 | 1.85 |                          |
| mtrD-02       | C26 | 28.5  | 81.26 | 1.95 |                          |
| mtrD-03       | C26 | 30.11 | 80.28 | 1.79 |                          |
| NDM1          | C26 |       |       |      | NoAmplification          |
| nimE          | C26 |       |       |      | NoAmplification          |
| nisB          | C26 |       |       |      | NoAmplification          |
| oleC          | C26 | 36.01 | 75.44 | 1.83 | MultipleMeltPeaks        |
| oprD          | C26 | 29.3  | 81.53 | 2.01 | MultipleMeltPeaks        |
| oprJ          | C26 | 34.71 | 79.54 | 1.83 | MultipleMeltPeaks        |
| pbp           | C26 |       |       |      | NoAmplification          |
| pbp2x         | C26 |       |       |      | NoAmplification          |
| Pbp5          | C26 |       |       |      | NoAmplification          |
| penA          | C26 |       |       |      | NoAmplification          |
| pikR1         | C26 |       |       |      | CurveFitFailed           |
| pikR2         | C26 | 29.77 | 85.25 | 1.95 |                          |
| pmrA          | C26 | 23.57 | 78.81 | 2.05 |                          |
| pncA          | C26 | 33.18 | 83.57 | 2    | MultipleMeltPeaks        |
| putative mulI | C26 |       |       |      | NoAmplification          |
| qac           | C26 |       |       |      | CurveFitFailed           |
| qacA          | C26 | 34.89 | 70.42 | 1.7  |                          |
| qacA/qacB     | C26 |       |       |      | NoAmplification          |
| qacEdelta1-0  | C26 |       |       |      | NoAmplification          |
| qacEdelta1-0  | C26 | 34.86 | 75.4  | 1.97 |                          |
| qacH-01       | C26 | 33.34 | 85.18 | 1.93 | MultipleMeltPeaks        |
| qacH-02       | C26 | 35.59 | 86.36 | 1.68 | MultipleMeltPeaks        |
| qnrA          | C26 | 32.64 | 86.18 | 1.86 |                          |

|              |     |       |       |      |                   |
|--------------|-----|-------|-------|------|-------------------|
| rarD-02      | C26 |       |       |      | NoAmplification   |
| sat4         | C26 |       |       |      | NoAmplification   |
| sdeB         | C26 |       |       |      | NoAmplification   |
| spcN-01      | C26 | 38.94 | 84.33 | 1.7  | MultipleMeltPeaks |
| speA         | C26 |       |       |      | NoAmplification   |
| str          | C26 |       |       |      | NoAmplification   |
| strA         | C26 |       |       |      | NoAmplification   |
| strB         | C26 | 36.53 | 86.9  | 1.83 |                   |
| sul1         | C26 |       |       |      | NoAmplification   |
| sul2         | C26 |       |       |      | NoAmplification   |
| sulA/foIP-01 | C26 | 23.83 | 81.94 | 2    |                   |
| sulA/foIP-03 | C26 | 22.85 | 84.07 | 1.99 |                   |
| tet(32)      | C26 |       |       |      | NoAmplification   |
| tet(34)      | C26 | 35.02 | 75.06 | 1.95 |                   |
| tet(35)      | C26 | 39.62 | 75.29 | 1.72 | MultipleMeltPeaks |
| tet(36)-A    | C26 | 39.56 | 81.93 | 1.73 |                   |
| tet(36)-B    | C26 |       |       |      | NoAmplification   |
| tet(37)      | C26 | 32.16 | 89.23 | 1.93 |                   |
| tetA-01      | C26 | 32.41 | 85.03 | 1.95 |                   |
| tetA-02      | C26 | 35.11 | 88.8  | 1.77 |                   |
| tetB-01      | C26 | 31.65 | 85.93 | 1.96 |                   |
| tetB-02      | C26 |       |       |      | NoAmplification   |
| tetC-01      | C26 |       |       |      | NoAmplification   |
| tetC-02      | C26 | 36.38 | 75.94 | 1.86 |                   |
| tetD-01      | C26 |       |       |      | NoAmplification   |
| tetD-02      | C26 | 35.58 | 75.85 | 2.03 |                   |
| tetE         | C26 |       |       |      | NoAmplification   |
| tetG-01      | C26 |       |       |      | CurveFitFailed    |
| tetG-02      | C26 | 31.04 | 81.51 | 1.92 |                   |
| tetH         | C26 |       |       |      | NoAmplification   |
| tetJ         | C26 | 38.53 | 80.08 | 1.81 | MultipleMeltPeaks |
| tetK         | C26 |       |       |      | NoAmplification   |
| tetL-01      | C26 |       |       |      | NoAmplification   |
| tetL-02      | C26 | 38.15 | 85.39 | 1.59 |                   |
| tetM-01      | C26 | 24.14 | 76    | 2.01 |                   |
| tetM-02      | C26 | 24.27 | 77.66 | 2.03 |                   |
| tetO-01      | C26 | 23.33 | 76.79 | 1.95 |                   |
| tetPA        | C26 |       |       |      | NoAmplification   |
| tetPB-01     | C26 |       |       |      | NoAmplification   |
| tetPB-02     | C26 | 29.01 | 84.83 | 2.02 |                   |
| tetPB-03     | C26 |       |       |      | NoAmplification   |
| tetPB-05     | C26 |       |       |      | NoAmplification   |
| tetQ         | C26 | 24.9  | 76.04 | 2.05 |                   |
| tetR-02      | C26 | 31.6  | 89.78 | 1.75 | MultipleMeltPeaks |
| tetR-03      | C26 |       |       |      | NoAmplification   |
| tetS         | C26 | 41.1  | 77.56 | 1.7  | MultipleMeltPeaks |

|             |     |       |       |      |                   |
|-------------|-----|-------|-------|------|-------------------|
| tetT        | C26 | 33.28 | 73.11 | 2.08 |                   |
| tetU-01     | C26 |       |       |      | NoAmplification   |
| tetV        | C26 |       |       |      | NoAmplification   |
| tetW-01     | C26 | 23.39 | 81.93 | 2.01 |                   |
| tetX        | C26 |       |       |      | NoAmplification   |
| tnpA-01     | C26 | 36.14 | 82.37 | 2    | MultipleMeltPeaks |
| tnpA-02     | C26 | 33.19 | 85.52 | 1.75 |                   |
| tnpA-03     | C26 | 32.21 | 86.83 | 1.91 | MultipleMeltPeaks |
| tnpA-04     | C26 |       |       |      | CurveFitFailed    |
| tnpA-05     | C26 |       |       |      | NoAmplification   |
| tnpA-07     | C26 |       |       |      | NoAmplification   |
| tolC-01     | C26 | 36.47 | 86.57 | 1.79 | MultipleMeltPeaks |
| tolC-02     | C26 | 29.46 | 87.22 | 1.94 |                   |
| tolC-03     | C26 | 29.87 | 87.46 | 1.92 |                   |
| Tp614       | C26 | 37.88 | 73.73 | 1.82 |                   |
| ttgA        | C26 |       |       |      | NoAmplification   |
| ttgB        | C26 | 35.29 | 78.55 | 1.97 |                   |
| vanA        | C26 |       |       |      | NoAmplification   |
| vanB-01     | C26 | 32.9  | 85.63 | 1.72 |                   |
| vanC-01     | C26 | 35.37 | 73.08 | 2.06 |                   |
| vanC-02     | C26 |       |       |      | NoAmplification   |
| vanC-03     | C26 | 28.08 | 86.16 | 1.93 |                   |
| vanC1       | C26 |       |       |      | NoAmplification   |
| vanC2/vanC3 | C26 | 33.01 | 79.76 | 1.88 | MultipleMeltPeaks |
| vanG        | C26 |       |       |      | NoAmplification   |
| vanHB       | C26 | 33.77 | 87.05 | 1.93 |                   |
| vanHD       | C26 |       |       |      | NoAmplification   |
| vanRA-01    | C26 |       |       |      | NoAmplification   |
| vanRA-02    | C26 |       |       |      | NoAmplification   |
| vanRB       | C26 | 37.04 | 80.03 | 1.79 | MultipleMeltPeaks |
| vanRC       | C26 |       |       |      | NoAmplification   |
| vanRC4      | C26 |       |       |      | NoAmplification   |
| vanRD       | C26 |       |       |      | NoAmplification   |
| vanSA       | C26 |       |       |      | NoAmplification   |
| vanSB       | C26 | 30.21 | 74.13 | 1.88 |                   |
| vanSC-01    | C26 |       |       |      | NoAmplification   |
| vanSC-02    | C26 | 32.25 | 75.95 | 1.81 |                   |
| vanTC-01    | C26 |       |       |      | NoAmplification   |
| vanTC-02    | C26 |       |       |      | NoAmplification   |
| vanTE       | C26 |       |       |      | NoAmplification   |
| vanTG       | C26 |       |       |      | NoAmplification   |
| vanWB       | C26 |       |       |      | NoAmplification   |
| vanWG       | C26 | 36.23 | 74.15 | 1.91 |                   |
| vanXA       | C26 | 38.65 | 73.27 | 1.79 |                   |
| vanXB       | C26 |       |       |      | NoAmplification   |
| vanXD       | C26 | 29.77 | 74.98 | 2.08 |                   |

|              |     |       |       |      |                   |
|--------------|-----|-------|-------|------|-------------------|
| vanYB        | C26 | 32.57 | 81.13 | 1.99 | MultipleMeltPeaks |
| vanYD-01     | C26 | 32.46 | 81.46 | 1.62 | MultipleMeltPeaks |
| vanYD-02     | C26 | 37.56 | 79.86 | 1.85 |                   |
| vatB-01      | C26 |       |       |      | NoAmplification   |
| vatB-02      | C26 | 34.01 | 80.61 | 1.92 | MultipleMeltPeaks |
| vatC-01      | C26 | 36.31 | 81.26 | 1.83 |                   |
| vatC-02      | C26 | 32.8  | 87.52 | 1.89 |                   |
| vatE-01      | C26 | 29.77 | 76.48 | 2.03 |                   |
| vatE-02      | C26 |       |       |      | NoAmplification   |
| vgaA-01      | C26 |       |       |      | NoAmplification   |
| vgaA-02      | C26 |       |       |      | CurveFitFailed    |
| vgb-01       | C26 |       |       |      | NoAmplification   |
| vgbB-01      | C26 |       |       |      | NoAmplification   |
| vgbB-02      | C26 |       |       |      | NoAmplification   |
| yceE/mdtG-0  | C26 | 32.77 | 77.56 | 2.09 |                   |
| yceE/mdtG-0  | C26 | 37.81 | 78.75 | 1.75 |                   |
| yceL/mdtH-0  | C26 | 31.86 | 85.53 | 1.96 |                   |
| yceL/mdtH-0  | C26 |       |       |      | NoAmplification   |
| yceL/mdtH-0  | C26 | 38.64 | 77.88 | 1.87 | MultipleMeltPeaks |
| yidY/mdtL-01 | C26 | 31.12 | 88.6  | 1.97 |                   |
| yidY/mdtL-02 | C26 |       |       |      | NoAmplification   |

| Assay          | Sample | Ct | Tm    | Efficiency | Flags                  |
|----------------|--------|----|-------|------------|------------------------|
| 16S rRNA       | C27    |    | 17.37 | 82.2       | 1.98                   |
| aac            | C27    |    | 33.63 | 80.7       | 1.86 MultipleMeltPeaks |
| aac(6')-Ib(akz | C27    |    |       |            | NoAmplification        |
| aac(6')-Ib(akz | C27    |    | 35.45 | 89.03      | 1.84                   |
| aac(6')-Ib(akz | C27    |    | 39.05 | 81.52      | 1.73 MultipleMeltPeaks |
| aac(6')-II     | C27    |    |       |            | CurveFitFailed         |
| aac(6')I1      | C27    |    | 38.56 | 63.01      | 1.73 MultipleMeltPeaks |
| aacA/aphD      | C27    |    |       |            | NoAmplification        |
| aacC           | C27    |    | 31.9  | 88.7       | 1.9 MultipleMeltPeaks  |
| aacC1          | C27    |    |       |            | NoAmplification        |
| aacC2          | C27    |    |       |            | NoAmplification        |
| aacC4          | C27    |    | 32.11 | 92.19      | 1.99                   |
| aadA-01        | C27    |    |       |            | NoAmplification        |
| aadA-02        | C27    |    |       |            | NoAmplification        |
| aadA-1-01      | C27    |    |       |            | NoAmplification        |
| aadA-1-02      | C27    |    |       |            | NoAmplification        |
| aadA1          | C27    |    |       |            | NoAmplification        |
| aadA2-01       | C27    |    |       |            | NoAmplification        |
| aadA2-02       | C27    |    |       |            | NoAmplification        |
| aadA2-03       | C27    |    |       |            | NoAmplification        |
| aadA5-01       | C27    |    |       |            | CurveFitFailed         |
| aadA5-02       | C27    |    | 36.07 | 77.68      | 1.83 MultipleMeltPeaks |
| aadA9-01       | C27    |    |       |            | CurveFitFailed         |
| aadA9-02       | C27    |    |       |            | NoAmplification        |
| aadD           | C27    |    |       |            | NoAmplification        |
| aadE           | C27    |    |       |            | NoAmplification        |
| acrA-01        | C27    |    | 26.65 | 83.01      | 1.96                   |
| acrA-02        | C27    |    | 38.67 | 62.33      | 1.8 MultipleMeltPeaks  |
| acrA-03        | C27    |    | 36.08 | 83.49      | 1.81                   |
| acrA-04        | C27    |    | 31.38 | 87.25      | 2                      |
| acrA-05        | C27    |    | 30.96 | 91.02      | 1.97                   |
| acrB-01        | C27    |    |       |            | NoAmplification        |
| acrF           | C27    |    | 28.43 | 82.89      | 1.81                   |
| acrR-01        | C27    |    |       |            | CurveFitFailed         |
| acrR-02        | C27    |    | 36.36 | 86.31      | 1.77 MultipleMeltPeaks |
| Actin          | C27    |    | 24.88 | 86.85      | 1.92                   |
| adeA           | C27    |    | 36.85 | 83.6       | 1.74                   |
| ampC-01        | C27    |    | 29.88 | 91.25      | 1.96                   |
| ampC-02        | C27    |    |       |            | NoAmplification        |
| ampC-04        | C27    |    | 35.05 | 76.35      | 1.61 MultipleMeltPeaks |
| ampC-05        | C27    |    |       |            | NoAmplification        |
| ampC-06        | C27    |    |       |            | NoAmplification        |
| ampC-07        | C27    |    | 33.4  | 86.13      | 1.81 MultipleMeltPeaks |
| ampC-09        | C27    |    |       |            | CurveFitFailed         |
| ampC/blaDH     | C27    |    | 32.37 | 84.37      | 1.93                   |

|                            |     |       |       |      |                   |
|----------------------------|-----|-------|-------|------|-------------------|
| aph                        | C27 |       |       |      | NoAmplification   |
| aph(2')-Id-01              | C27 |       |       |      | NoAmplification   |
| aph(2')-Id-02              | C27 |       |       |      | NoAmplification   |
| aph6ia                     | C27 |       |       |      | NoAmplification   |
| aphA1(aka k <sub>z</sub> ) | C27 |       |       |      | NoAmplification   |
| bacA-01                    | C27 |       |       |      | NoAmplification   |
| bacA-02                    | C27 | 35.41 | 83.44 | 1.64 |                   |
| BETA-globin                | C27 | 25.82 | 84.06 | 1.96 |                   |
| bla-ACC-1                  | C27 |       |       |      | NoAmplification   |
| bla-L1                     | C27 | 32.29 | 89.49 | 1.97 |                   |
| bla1                       | C27 |       |       |      | NoAmplification   |
| blaCMY                     | C27 |       |       |      | NoAmplification   |
| blaCMY2-01                 | C27 |       |       |      | NoAmplification   |
| blaCMY2-02                 | C27 | 30.59 | 82.78 | 1.93 | MultipleMeltPeaks |
| blaCTX-M-01                | C27 |       |       |      | CurveFitFailed    |
| blaCTX-M-02                | C27 |       |       |      | NoAmplification   |
| blaCTX-M-03                | C27 |       |       |      | NoAmplification   |
| blaCTX-M-04                | C27 | 31.37 | 86.99 | 1.82 |                   |
| blaCTX-M-05                | C27 | 31.21 | 75.98 | 1.86 |                   |
| blaCTX-M-06                | C27 |       |       |      | NoAmplification   |
| blaGES                     | C27 |       |       |      | NoAmplification   |
| blaIMP-01                  | C27 |       |       |      | NoAmplification   |
| blaIMP-02                  | C27 |       |       |      | NoAmplification   |
| blaMOX/blaC                | C27 |       |       |      | NoAmplification   |
| blaOCH                     | C27 |       |       |      | NoAmplification   |
| blaOKP                     | C27 |       |       |      | NoAmplification   |
| blaOXA1/blaC               | C27 |       |       |      | NoAmplification   |
| blaOXA10-01                | C27 |       |       |      | NoAmplification   |
| blaOXA10-02                | C27 | 37.9  | 83.91 | 1.96 |                   |
| blaOXY                     | C27 | 38.5  | 90.72 | 1.61 | MultipleMeltPeaks |
| blaPAO                     | C27 |       |       |      | NoAmplification   |
| blaPER                     | C27 |       |       |      | NoAmplification   |
| blaPSE                     | C27 |       |       |      | NoAmplification   |
| blaROB                     | C27 |       |       |      | CurveFitFailed    |
| blaSFO                     | C27 | 34.12 | 81    | 1.87 | MultipleMeltPeaks |
| blaSHV-01                  | C27 |       |       |      | NoAmplification   |
| blaSHV-02                  | C27 |       |       |      | NoAmplification   |
| blaTEM                     | C27 |       |       |      | NoAmplification   |
| blaTLA                     | C27 |       |       |      | NoAmplification   |
| blaVEB                     | C27 |       |       |      | NoAmplification   |
| blaVIM                     | C27 |       |       |      | NoAmplification   |
| blaZ                       | C27 | 32.64 | 73.61 | 1.92 |                   |
| carB                       | C27 | 37.21 | 87.5  | 1.8  | MultipleMeltPeaks |
| catA1                      | C27 |       |       |      | NoAmplification   |
| catB3                      | C27 |       |       |      | CurveFitFailed    |
| catB8                      | C27 | 35.63 | 79.38 | 1.84 |                   |



|            |     |       |       |      |                              |
|------------|-----|-------|-------|------|------------------------------|
| ceoA       | C27 | 33.36 | 82.11 | 1.9  | MultipleMeltPeaks            |
| cepA       | C27 |       |       |      | NoAmplification              |
| cfiA       | C27 |       |       |      | NoAmplification              |
| cfr        | C27 |       |       |      | NoAmplification              |
| cfxA       | C27 | 19.36 | 77.59 | 1.95 |                              |
| cmeA       | C27 |       |       |      | NoAmplification              |
| cmlA1-01   | C27 | 37.67 | 65.32 | 1.68 | MultipleMeltPeaks            |
| cmlA1-02   | C27 | 35.67 | 88.36 | 1.8  | MultipleMeltPeaks            |
| cmr        | C27 |       |       |      | CurveFitFailed               |
| cmx(A)     | C27 | 31.33 | 84.52 | 1.93 |                              |
| cphA-01    | C27 | 39.26 | 81.3  | 1.74 |                              |
| cphA-02    | C27 |       |       |      | CurveFitFailed               |
| dfrA1      | C27 |       |       |      | NoAmplification              |
| dfrA12     | C27 |       |       |      | NoAmplification              |
| emrD       | C27 | 34.56 | 90.61 | 1.75 |                              |
| ereA       | C27 |       |       |      | CurveFitFailed               |
| ereB       | C27 | 41.58 | 81.18 | 1.67 | MultipleMeltPeaks            |
| erm(34)    | C27 |       |       |      | NoAmplification              |
| erm(35)    | C27 |       |       |      | NoAmplification              |
| erm(36)    | C27 |       |       |      | NoAmplification              |
| ermA       | C27 |       |       |      | NoAmplification              |
| ermA/ermTR | C27 |       |       |      | NoAmplification              |
| ermB       | C27 | 27.71 | 74.96 | 2.07 |                              |
| ermC       | C27 | 28.25 | 75.54 | 1.97 |                              |
| ermF       | C27 |       |       |      | NoAmplification              |
| ermJ/ermD  | C27 |       |       |      | NoAmplification              |
| ermK-01    | C27 |       |       |      | NoAmplification              |
| ermK-02    | C27 |       |       |      | NoAmplification              |
| ermT-01    | C27 |       |       |      | NoAmplification              |
| ermT-02    | C27 |       |       |      | NoAmplification              |
| ermX       | C27 |       |       |      | NoAmplification              |
| ermY       | C27 |       |       |      | NoAmplification              |
| fabK       | C27 | 25.15 | 78.92 | 2.1  |                              |
| floR       | C27 | 32.73 | 80.52 | 1.86 | MultipleMeltPeaks            |
| folA       | C27 |       |       |      | NoAmplification              |
| fosB       | C27 |       |       |      | LowEfficiency, CtIsSmall, S: |
| fosX       | C27 |       |       |      | NoAmplification              |
| fox5       | C27 | 32.37 | 81.49 | 1.92 |                              |
| imiR       | C27 |       |       |      | NoAmplification              |
| ImrA-01    | C27 |       |       |      | NoAmplification              |
| intl       | C27 | 32.74 | 89.35 | 1.91 |                              |
| intl1      | C27 | 23.79 | 87.94 | 1.95 | MultipleMeltPeaks            |
| IS613      | C27 | 19.96 | 79.68 | 2.05 |                              |
| lnuA-01    | C27 |       |       |      | NoAmplification              |
| lnuB-01    | C27 |       |       |      | NoAmplification              |
| lnuB-02    | C27 |       |       |      | NoAmplification              |

|                |     |       |       |      |                   |
|----------------|-----|-------|-------|------|-------------------|
| lnuC           | C27 | 31.48 | 78.63 | 1.97 |                   |
| marR-01        | C27 | 37.01 | 83.28 | 1.75 | MultipleMeltPeaks |
| matA/mel       | C27 | 22.31 | 77.72 | 2.06 |                   |
| mdet1          | C27 |       |       |      | NoAmplification   |
| mdtA           | C27 |       |       |      | CurveFitFailed    |
| mdtE/yhiU      | C27 | 34.98 | 86.05 | 1.79 | MultipleMeltPeaks |
| mecA           | C27 |       |       |      | NoAmplification   |
| mefA           | C27 | 20.95 | 80.47 | 1.98 |                   |
| mepA           | C27 | 32.67 | 78.37 | 1.97 | MultipleMeltPeaks |
| mexA           | C27 |       |       |      | NoAmplification   |
| mexD           | C27 | 32.59 | 80.19 | 2.04 |                   |
| mexE           | C27 | 39.29 | 87.44 | 1.75 | MultipleMeltPeaks |
| mexF           | C27 | 28.69 | 81.33 | 1.86 |                   |
| mphA-01        | C27 | 26.65 | 88.46 | 1.98 |                   |
| mphA-02        | C27 | 33.05 | 90.3  | 1.6  | MultipleMeltPeaks |
| mphB           | C27 |       |       |      | CurveFitFailed    |
| mphC           | C27 |       |       |      | NoAmplification   |
| msrA-01        | C27 |       |       |      | NoAmplification   |
| msrC-01        | C27 |       |       |      | NoAmplification   |
| mtrC-01        | C27 |       |       |      | NoAmplification   |
| mtrC-02        | C27 |       |       |      | NoAmplification   |
| mtrD-02        | C27 | 29.07 | 84.22 | 1.99 |                   |
| mtrD-03        | C27 | 33.49 | 79.93 | 1.84 |                   |
| NDM1           | C27 |       |       |      | NoAmplification   |
| nimE           | C27 | 36.33 | 75.11 | 2.05 |                   |
| nisB           | C27 |       |       |      | NoAmplification   |
| oleC           | C27 | 36.2  | 83.99 | 1.82 | MultipleMeltPeaks |
| oprD           | C27 | 32.58 | 86.8  | 1.93 |                   |
| oprJ           | C27 | 31.47 | 90.52 | 1.81 |                   |
| pbp            | C27 |       |       |      | NoAmplification   |
| pbp2x          | C27 | 25.19 | 74.79 | 1.71 |                   |
| Pbp5           | C27 |       |       |      | NoAmplification   |
| penA           | C27 |       |       |      | NoAmplification   |
| pikR1          | C27 | 31.47 | 89.18 | 1.92 |                   |
| pikR2          | C27 | 36.96 | 75.27 | 1.81 | MultipleMeltPeaks |
| pmrA           | C27 | 25.36 | 79.57 | 2.07 |                   |
| pncA           | C27 | 29.78 | 89.23 | 1.92 | MultipleMeltPeaks |
| putative multi | C27 | 37.87 | 77.28 | 1.84 | MultipleMeltPeaks |
| qac            | C27 | 38.66 | 61.23 | 1.93 | MultipleMeltPeaks |
| qacA           | C27 |       |       |      | NoAmplification   |
| qacA/qacB      | C27 |       |       |      | NoAmplification   |
| qacEdelta1-0   | C27 |       |       |      | NoAmplification   |
| qacEdelta1-0   | C27 | 32.65 | 91.02 | 1.89 |                   |
| qacH-01        | C27 | 36.39 | 86.71 | 1.83 | MultipleMeltPeaks |
| qacH-02        | C27 | 38.67 | 90.11 | 1.66 | MultipleMeltPeaks |
| qnrA           | C27 | 41.6  | 61.69 | 1.74 | MultipleMeltPeaks |

|              |     |       |       |      |                   |
|--------------|-----|-------|-------|------|-------------------|
| rarD-02      | C27 |       |       |      | CurveFitFailed    |
| sat4         | C27 |       |       |      | NoAmplification   |
| sdeB         | C27 |       |       |      | NoAmplification   |
| spcN-01      | C27 |       |       |      | NoAmplification   |
| speA         | C27 |       |       |      | NoAmplification   |
| str          | C27 |       |       |      | NoAmplification   |
| strA         | C27 |       |       |      | NoAmplification   |
| strB         | C27 |       |       |      | NoAmplification   |
| sul1         | C27 |       |       |      | NoAmplification   |
| sul2         | C27 | 36.08 | 88.41 | 1.84 |                   |
| sulA/foIP-01 | C27 | 23.19 | 81.81 | 1.97 |                   |
| sulA/foIP-03 | C27 | 24.13 | 83.44 | 1.98 |                   |
| tet(32)      | C27 | 24.04 | 81.25 | 2    |                   |
| tet(34)      | C27 | 29.98 | 75.82 | 2.01 |                   |
| tet(35)      | C27 |       |       |      | NoAmplification   |
| tet(36)-A    | C27 |       |       |      | NoAmplification   |
| tet(36)-B    | C27 |       |       |      | NoAmplification   |
| tet(37)      | C27 |       |       |      | NoAmplification   |
| tetA-01      | C27 | 35.2  | 85    | 1.88 |                   |
| tetA-02      | C27 | 36.42 | 80.46 | 1.85 | MultipleMeltPeaks |
| tetB-01      | C27 |       |       |      | NoAmplification   |
| tetB-02      | C27 |       |       |      | NoAmplification   |
| tetC-01      | C27 |       |       |      | NoAmplification   |
| tetC-02      | C27 |       |       |      | NoAmplification   |
| tetD-01      | C27 |       |       |      | NoAmplification   |
| tetD-02      | C27 | 41.59 | 85.86 | 1.7  |                   |
| tetE         | C27 |       |       |      | NoAmplification   |
| tetG-01      | C27 | 34.14 | 89.66 | 1.92 |                   |
| tetG-02      | C27 |       |       |      | CurveFitFailed    |
| tetH         | C27 |       |       |      | NoAmplification   |
| tetJ         | C27 |       |       |      | NoAmplification   |
| tetK         | C27 |       |       |      | NoAmplification   |
| tetL-01      | C27 |       |       |      | NoAmplification   |
| tetL-02      | C27 | 32.01 | 83.06 | 1.99 |                   |
| tetM-01      | C27 | 23.07 | 76.09 | 2    |                   |
| tetM-02      | C27 | 23.15 | 77.66 | 2.02 |                   |
| tetO-01      | C27 | 26.43 | 76.72 | 2.01 |                   |
| tetPA        | C27 |       |       |      | NoAmplification   |
| tetPB-01     | C27 | 36.15 | 84.34 | 1.87 |                   |
| tetPB-02     | C27 | 35.84 | 84.81 | 1.86 |                   |
| tetPB-03     | C27 |       |       |      | NoAmplification   |
| tetPB-05     | C27 |       |       |      | NoAmplification   |
| tetQ         | C27 | 25.73 | 75.92 | 2.03 |                   |
| tetR-02      | C27 | 30.46 | 87.17 | 1.91 |                   |
| tetR-03      | C27 |       |       |      | NoAmplification   |
| tetS         | C27 | 38.76 | 81.22 | 1.82 |                   |

|             |     |       |       |      |                   |
|-------------|-----|-------|-------|------|-------------------|
| tetT        | C27 |       |       |      | NoAmplification   |
| tetU-01     | C27 |       |       |      | NoAmplification   |
| tetV        | C27 |       |       |      | NoAmplification   |
| tetW-01     | C27 | 24.13 | 81.84 | 2    |                   |
| tetX        | C27 |       |       |      | NoAmplification   |
| tnpA-01     | C27 |       |       |      | NoAmplification   |
| tnpA-02     | C27 | 34.91 | 91.07 | 1.74 |                   |
| tnpA-03     | C27 |       |       |      | NoAmplification   |
| tnpA-04     | C27 |       |       |      | NoAmplification   |
| tnpA-05     | C27 |       |       |      | NoAmplification   |
| tnpA-07     | C27 |       |       |      | NoAmplification   |
| tolC-01     | C27 | 37.8  | 79.16 | 1.65 | MultipleMeltPeaks |
| tolC-02     | C27 | 32.51 | 88.18 | 1.91 |                   |
| tolC-03     | C27 | 34.43 | 81.09 | 1.8  | MultipleMeltPeaks |
| Tp614       | C27 |       |       |      | NoAmplification   |
| ttgA        | C27 | 29.33 | 86.37 | 1.9  |                   |
| ttgB        | C27 | 33.42 | 85.95 | 2.01 |                   |
| vanA        | C27 |       |       |      | NoAmplification   |
| vanB-01     | C27 |       |       |      | CurveFitFailed    |
| vanC-01     | C27 | 38.42 | 72.42 | 1.86 |                   |
| vanC-02     | C27 |       |       |      | NoAmplification   |
| vanC-03     | C27 | 31.06 | 84.76 | 1.91 | MultipleMeltPeaks |
| vanC1       | C27 |       |       |      | NoAmplification   |
| vanC2/vanC3 | C27 |       |       |      | CurveFitFailed    |
| vanG        | C27 |       |       |      | NoAmplification   |
| vanHB       | C27 | 38.02 | 81.94 | 1.8  |                   |
| vanHD       | C27 |       |       |      | NoAmplification   |
| vanRA-01    | C27 |       |       |      | NoAmplification   |
| vanRA-02    | C27 |       |       |      | NoAmplification   |
| vanRB       | C27 | 35.4  | 85.48 | 1.86 |                   |
| vanRC       | C27 |       |       |      | NoAmplification   |
| vanRC4      | C27 |       |       |      | NoAmplification   |
| vanRD       | C27 |       |       |      | NoAmplification   |
| vanSA       | C27 |       |       |      | NoAmplification   |
| vanSB       | C27 | 28.97 | 74.33 | 2    |                   |
| vanSC-01    | C27 |       |       |      | NoAmplification   |
| vanSC-02    | C27 |       |       |      | NoAmplification   |
| vanTC-01    | C27 |       |       |      | NoAmplification   |
| vanTC-02    | C27 |       |       |      | NoAmplification   |
| vanTE       | C27 |       |       |      | NoAmplification   |
| vanTG       | C27 |       |       |      | NoAmplification   |
| vanWB       | C27 |       |       |      | NoAmplification   |
| vanWG       | C27 |       |       |      | NoAmplification   |
| vanXA       | C27 |       |       |      | NoAmplification   |
| vanXB       | C27 |       |       |      | NoAmplification   |
| vanXD       | C27 | 30.59 | 75.12 | 2.08 |                   |

|              |     |       |       |      |                   |
|--------------|-----|-------|-------|------|-------------------|
| vanYB        | C27 |       |       |      | CurveFitFailed    |
| vanYD-01     | C27 | 37.44 | 80.78 | 1.72 |                   |
| vanYD-02     | C27 |       |       |      | NoAmplification   |
| vatB-01      | C27 |       |       |      | NoAmplification   |
| vatB-02      | C27 |       |       |      | NoAmplification   |
| vatC-01      | C27 |       |       |      | NoAmplification   |
| vatC-02      | C27 |       |       |      | CurveFitFailed    |
| vatE-01      | C27 | 30.73 | 76.86 | 2.06 |                   |
| vatE-02      | C27 |       |       |      | NoAmplification   |
| vgaA-01      | C27 | 38.06 | 75.93 | 1.81 |                   |
| vgaA-02      | C27 |       |       |      | NoAmplification   |
| vgb-01       | C27 |       |       |      | NoAmplification   |
| vgbB-01      | C27 |       |       |      | NoAmplification   |
| vgbB-02      | C27 |       |       |      | NoAmplification   |
| yceE/mdtG-0  | C27 |       |       |      | NoAmplification   |
| yceE/mdtG-0  | C27 |       |       |      | NoAmplification   |
| yceL/mdtH-0  | C27 | 30.37 | 76.7  | 1.98 |                   |
| yceL/mdtH-0  | C27 |       |       |      | NoAmplification   |
| yceL/mdtH-0  | C27 | 40.94 | 88.75 | 1.61 | MultipleMeltPeaks |
| yidY/mdtL-01 | C27 | 33.13 | 90.25 | 1.94 | MultipleMeltPeaks |
| yidY/mdtL-02 | C27 | 37.22 | 81.96 | 1.82 |                   |

| Assay          | Sample | Ct | Tm    | Efficiency | Flags                        |
|----------------|--------|----|-------|------------|------------------------------|
| 16S rRNA       | C28    |    | 17.71 | 82.02      | 1.98                         |
| aac            | C28    |    | 32.17 | 81.96      | 1.85 MultipleMeltPeaks       |
| aac(6')-Ib(akz | C28    |    |       |            | LowEfficiency, CtIsSmall, S: |
| aac(6')-Ib(akz | C28    |    | 30.93 | 80.4       | 1.97 MultipleMeltPeaks       |
| aac(6')-Ib(akz | C28    |    | 36.32 | 78.07      | 1.73 MultipleMeltPeaks       |
| aac(6')-II     | C28    |    | 35.85 | 80.79      | 1.76                         |
| aac(6')I1      | C28    |    |       |            | NoAmplification              |
| aacA/aphD      | C28    |    |       |            | LowEfficiency, CtIsSmall, S: |
| aacC           | C28    |    | 34.56 | 85.81      | 1.85 MultipleMeltPeaks       |
| aacC1          | C28    |    | 33.41 | 89.27      | 1.96                         |
| aacC2          | C28    |    |       |            | NoAmplification              |
| aacC4          | C28    |    |       |            | NoAmplification              |
| aadA-01        | C28    |    |       |            | LowEfficiency, CtIsSmall, C: |
| aadA-02        | C28    |    | 36.03 | 80.45      | 1.87                         |
| aadA-1-01      | C28    |    |       |            | NoAmplification              |
| aadA-1-02      | C28    |    |       |            | NoAmplification              |
| aadA1          | C28    |    |       |            | CurveFitFailed               |
| aadA2-01       | C28    |    |       |            | NoAmplification              |
| aadA2-02       | C28    |    |       |            | NoAmplification              |
| aadA2-03       | C28    |    |       |            | NoAmplification              |
| aadA5-01       | C28    |    |       |            | LowEfficiency, CtIsSmall, S: |
| aadA5-02       | C28    |    | 34.88 | 83.64      | 1.94                         |
| aadA9-01       | C28    |    | 38.28 | 88.6       | 1.76 MultipleMeltPeaks       |
| aadA9-02       | C28    |    |       |            | CurveFitFailed               |
| aadD           | C28    |    |       |            | NoAmplification              |
| aadE           | C28    |    |       |            | NoAmplification              |
| acrA-01        | C28    |    | 35.89 | 88.8       | 1.84 MultipleMeltPeaks       |
| acrA-02        | C28    |    |       |            | CurveFitFailed               |
| acrA-03        | C28    |    |       |            | CurveFitFailed               |
| acrA-04        | C28    |    | 30.49 | 80.65      | 1.97                         |
| acrA-05        | C28    |    | 29.32 | 91.11      | 1.94                         |
| acrB-01        | C28    |    | 39.08 | 79.63      | 1.84 MultipleMeltPeaks       |
| acrF           | C28    |    | 31.35 | 83.26      | 1.93                         |
| acrR-01        | C28    |    | 34.48 | 89.53      | 1.88                         |
| acrR-02        | C28    |    | 36.18 | 85.96      | 1.74                         |
| Actin          | C28    |    | 22.11 | 86.88      | 1.98                         |
| adeA           | C28    |    | 37.64 | 83.98      | 1.78 MultipleMeltPeaks       |
| ampC-01        | C28    |    | 32.48 | 85.56      | 2.01                         |
| ampC-02        | C28    |    | 40.01 | 61.65      | 1.86 MultipleMeltPeaks       |
| ampC-04        | C28    |    | 34.93 | 77.83      | 2                            |
| ampC-05        | C28    |    |       |            | NoAmplification              |
| ampC-06        | C28    |    | 36.31 | 84.08      | 1.86                         |
| ampC-07        | C28    |    | 39.38 | 88.05      | 1.67 MultipleMeltPeaks       |
| ampC-09        | C28    |    |       |            | NoAmplification              |
| ampC/blaDH     | C28    |    | 30.33 | 78         | 1.96 MultipleMeltPeaks       |

|                          |     |       |       |      |                              |
|--------------------------|-----|-------|-------|------|------------------------------|
| aph                      | C28 |       |       |      | LowEfficiency, CtIsSmall, S: |
| aph(2')-Id-01            | C28 |       |       |      | LowEfficiency, CtIsSmall, S: |
| aph(2')-Id-02            | C28 |       |       |      | LowEfficiency, CtIsSmall, S: |
| aph6ia                   | C28 | 29.79 | 78.22 | 1.96 |                              |
| aphA1(aka k <sub>z</sub> | C28 | 36.06 | 77.86 | 1.89 | MultipleMeltPeaks            |
| bacA-01                  | C28 |       |       |      | NoAmplification              |
| bacA-02                  | C28 | 37.8  | 83.47 | 1.58 |                              |
| BETA-globin              | C28 | 23.61 | 84.04 | 2    |                              |
| bla-ACC-1                | C28 | 34.87 | 90.32 | 1.84 | MultipleMeltPeaks            |
| bla-L1                   | C28 | 29.73 | 86.21 | 1.96 |                              |
| bla1                     | C28 |       |       |      | LowEfficiency, CtIsSmall, S: |
| blaCMY                   | C28 |       |       |      | NoAmplification              |
| blaCMY2-01               | C28 |       |       |      | NoAmplification              |
| blaCMY2-02               | C28 | 29.72 | 82.38 | 1.96 |                              |
| blaCTX-M-01              | C28 |       |       |      | NoAmplification              |
| blaCTX-M-02              | C28 |       |       |      | NoAmplification              |
| blaCTX-M-03              | C28 |       |       |      | LowEfficiency, CtIsSmall, S: |
| blaCTX-M-04              | C28 | 37    | 87.99 | 1.83 |                              |
| blaCTX-M-05              | C28 | 34.77 | 76.29 | 1.82 |                              |
| blaCTX-M-06              | C28 | 38.55 | 82.6  | 1.95 |                              |
| blaGES                   | C28 |       |       |      | NoAmplification              |
| blaIMP-01                | C28 | 38.95 | 74.87 | 2.03 |                              |
| blaIMP-02                | C28 |       |       |      | LowEfficiency, CtIsSmall, S: |
| blaMOX/blaC              | C28 |       |       |      | NoAmplification              |
| blaOCH                   | C28 | 31.61 | 83.96 | 1.91 |                              |
| blaOKP                   | C28 |       |       |      | NoAmplification              |
| blaOXA1/blaC             | C28 |       |       |      | LowEfficiency, CtIsSmall, S: |
| blaOXA10-01              | C28 |       |       |      | LowEfficiency, CtIsSmall, S: |
| blaOXA10-02              | C28 |       |       |      | CurveFitFailed               |
| blaOXY                   | C28 |       |       |      | CurveFitFailed               |
| blaPAO                   | C28 |       |       |      | NoAmplification              |
| blaPER                   | C28 |       |       |      | LowEfficiency, CtIsSmall, C: |
| blaPSE                   | C28 |       |       |      | NoAmplification              |
| blaROB                   | C28 |       |       |      | NoAmplification              |
| blaSFO                   | C28 | 37.95 | 80.96 | 1.87 |                              |
| blaSHV-01                | C28 |       |       |      | NoAmplification              |
| blaSHV-02                | C28 |       |       |      | LowEfficiency, CtIsSmall, S: |
| blaTEM                   | C28 | 26.47 | 79.06 | 1.84 |                              |
| blaTLA                   | C28 |       |       |      | LowEfficiency, CtIsSmall, S: |
| blaVEB                   | C28 |       |       |      | NoAmplification              |
| blaVIM                   | C28 |       |       |      | NoAmplification              |
| blaZ                     | C28 |       |       |      | LowEfficiency, CtIsSmall, S: |
| carB                     | C28 |       |       |      | CurveFitFailed               |
| catA1                    | C28 |       |       |      | NoAmplification              |
| catB3                    | C28 |       |       |      | CurveFitFailed               |
| catB8                    | C28 | 29.64 | 82.67 | 2    |                              |

|            |     |       |       |      |                              |
|------------|-----|-------|-------|------|------------------------------|
| ceoA       | C28 | 26.84 | 82.54 | 1.95 |                              |
| cepA       | C28 |       |       |      | NoAmplification              |
| cfiA       | C28 |       |       |      | NoAmplification              |
| cfr        | C28 |       |       |      | LowEfficiency, CtIsSmall, S: |
| cfxA       | C28 | 22.91 | 77.58 | 1.94 |                              |
| cmeA       | C28 |       |       |      | CurveFitFailed               |
| cmlA1-01   | C28 | 40.37 | 88.26 | 1.69 |                              |
| cmlA1-02   | C28 | 37.73 | 87.48 | 1.83 |                              |
| cmr        | C28 |       |       |      | LowEfficiency, CtIsSmall, S: |
| cmx(A)     | C28 | 27.92 | 84.99 | 2    |                              |
| cphA-01    | C28 | 35.51 | 81.46 | 1.98 | MultipleMeltPeaks            |
| cphA-02    | C28 | 36.41 | 76.37 | 1.89 |                              |
| dfrA1      | C28 |       |       |      | NoAmplification              |
| dfrA12     | C28 |       |       |      | NoAmplification              |
| emrD       | C28 |       |       |      | NoAmplification              |
| ereA       | C28 | 35.68 | 82.52 | 1.9  |                              |
| ereB       | C28 | 36.64 | 89.08 | 1.84 |                              |
| erm(34)    | C28 |       |       |      | NoAmplification              |
| erm(35)    | C28 |       |       |      | NoAmplification              |
| erm(36)    | C28 |       |       |      | NoAmplification              |
| ermA       | C28 |       |       |      | LowEfficiency, CtIsSmall, S: |
| ermA/ermTR | C28 |       |       |      | NoAmplification              |
| ermB       | C28 | 28.47 | 75.01 | 2.12 |                              |
| ermC       | C28 |       |       |      | CurveFitFailed               |
| ermF       | C28 |       |       |      | CurveFitFailed               |
| ermJ/ermD  | C28 |       |       |      | LowEfficiency, CtIsSmall, S: |
| ermK-01    | C28 |       |       |      | LowEfficiency, CtIsSmall, S: |
| ermK-02    | C28 |       |       |      | NoAmplification              |
| ermT-01    | C28 |       |       |      | NoAmplification              |
| ermT-02    | C28 |       |       |      | NoAmplification              |
| ermX       | C28 |       |       |      | NoAmplification              |
| ermY       | C28 |       |       |      | LowEfficiency, CtIsSmall, S: |
| fabK       | C28 | 25.79 | 79.86 | 2.11 |                              |
| floR       | C28 |       |       |      | NoAmplification              |
| folA       | C28 |       |       |      | NoAmplification              |
| fosB       | C28 |       |       |      | LowEfficiency, CtIsSmall, S: |
| fosX       | C28 |       |       |      | CurveFitFailed               |
| fox5       | C28 | 32.91 | 86.31 | 1.85 |                              |
| imiR       | C28 |       |       |      | NoAmplification              |
| ImrA-01    | C28 | 36.12 | 82.64 | 1.93 |                              |
| intl       | C28 | 31.78 | 84.76 | 1.96 |                              |
| intl1      | C28 | 23.37 | 86.83 | 1.95 | MultipleMeltPeaks            |
| IS613      | C28 | 25.97 | 79.59 | 2.07 |                              |
| lnuA-01    | C28 |       |       |      | LowEfficiency, CtIsSmall, S: |
| lnuB-01    | C28 |       |       |      | CurveFitFailed               |
| lnuB-02    | C28 |       |       |      | LowEfficiency, CtIsSmall, C: |



|               |     |       |       |      |                              |
|---------------|-----|-------|-------|------|------------------------------|
| lnuC          | C28 | 38.84 | 77.43 | 1.63 | MultipleMeltPeaks            |
| marR-01       | C28 | 33.11 | 85.18 | 1.96 |                              |
| matA/mel      | C28 | 22.42 | 77.66 | 2.07 |                              |
| mdetI1        | C28 |       |       |      | NoAmplification              |
| mdtA          | C28 | 38.56 | 82.2  | 1.62 |                              |
| mdtE/yhiU     | C28 | 43.98 | 83.38 | 1.57 | MultipleMeltPeaks            |
| mecA          | C28 |       |       |      | NoAmplification              |
| mefA          | C28 | 21.4  | 80.48 | 1.99 |                              |
| mepA          | C28 | 36.45 | 87.86 | 1.8  |                              |
| mexA          | C28 | 41.73 | 78.26 | 1.68 | MultipleMeltPeaks            |
| mexD          | C28 |       |       |      | NoAmplification              |
| mexE          | C28 |       |       |      | NoAmplification              |
| mexF          | C28 | 32.49 | 81.11 | 1.71 |                              |
| mphA-01       | C28 | 31.02 | 89.31 | 1.97 |                              |
| mphA-02       | C28 | 32.56 | 86.75 | 1.64 |                              |
| mphB          | C28 |       |       |      | CurveFitFailed               |
| mphC          | C28 |       |       |      | CurveFitFailed               |
| msrA-01       | C28 | 38.31 | 72.45 | 1.86 |                              |
| msrC-01       | C28 |       |       |      | NoAmplification              |
| mtrC-01       | C28 |       |       |      | NoAmplification              |
| mtrC-02       | C28 | 39.56 | 75.5  | 1.79 |                              |
| mtrD-02       | C28 | 28.94 | 81.67 | 1.99 |                              |
| mtrD-03       | C28 | 27.21 | 80.46 | 1.81 |                              |
| NDM1          | C28 |       |       |      | NoAmplification              |
| nimE          | C28 | 37.85 | 84.56 | 1.93 |                              |
| nisB          | C28 |       |       |      | NoAmplification              |
| oleC          | C28 | 35.11 | 89.04 | 1.86 |                              |
| oprD          | C28 | 30    | 87.84 | 1.96 | MultipleMeltPeaks            |
| oprJ          | C28 | 36.79 | 87.75 | 1.87 |                              |
| pbp           | C28 |       |       |      | LowEfficiency, CtIsSmall, S: |
| pbp2x         | C28 |       |       |      | NoAmplification              |
| Pbp5          | C28 |       |       |      | CurveFitFailed               |
| penA          | C28 | 25.95 | 80.35 | 1.9  |                              |
| pikR1         | C28 |       |       |      | CurveFitFailed               |
| pikR2         | C28 | 33.26 | 84.66 | 1.99 |                              |
| pmrA          | C28 | 23.2  | 79.64 | 2.06 |                              |
| pncA          | C28 | 34.41 | 84.29 | 1.98 |                              |
| putative mult | C28 |       |       |      | LowEfficiency, CtIsSmall, S: |
| qac           | C28 |       |       |      | LowEfficiency, CtIsSmall, S: |
| qacA          | C28 |       |       |      | NoAmplification              |
| qacA/qacB     | C28 |       |       |      | NoAmplification              |
| qacEdelta1-0  | C28 |       |       |      | NoAmplification              |
| qacEdelta1-0  | C28 | 32.38 | 90.75 | 1.97 |                              |
| qacH-01       | C28 | 33.13 | 86.54 | 1.98 |                              |
| qacH-02       | C28 | 36.9  | 83.94 | 1.62 |                              |
| qnrA          | C28 | 44.15 | 73.29 | 1.75 | MultipleMeltPeaks            |

|              |     |       |       |      |                             |
|--------------|-----|-------|-------|------|-----------------------------|
| rarD-02      | C28 | 35.67 | 83.73 | 1.97 |                             |
| sat4         | C28 |       |       |      | LowEfficiency, CtIsSmall, S |
| sdeB         | C28 | 35.64 | 88.68 | 1.84 |                             |
| spcN-01      | C28 |       |       |      | NoAmplification             |
| speA         | C28 |       |       |      | NoAmplification             |
| str          | C28 |       |       |      | NoAmplification             |
| strA         | C28 |       |       |      | LowEfficiency, CtIsSmall, C |
| strB         | C28 | 33.31 | 79.18 | 1.96 |                             |
| sul1         | C28 |       |       |      | NoAmplification             |
| sul2         | C28 |       |       |      | LowEfficiency, CtIsSmall, S |
| sulA/foIP-01 | C28 | 21.32 | 80.78 | 2.02 |                             |
| sulA/foIP-03 | C28 | 22.48 | 83.22 | 2    |                             |
| tet(32)      | C28 | 27.63 | 81.12 | 1.99 |                             |
| tet(34)      | C28 | 28.93 | 76.02 | 2.03 |                             |
| tet(35)      | C28 |       |       |      | NoAmplification             |
| tet(36)-A    | C28 | 34.77 | 81.91 | 1.9  |                             |
| tet(36)-B    | C28 |       |       |      | LowEfficiency, CtIsSmall, S |
| tet(37)      | C28 | 26.66 | 75.54 | 2.01 | MultipleMeltPeaks           |
| tetA-01      | C28 | 29.96 | 85.1  | 1.89 |                             |
| tetA-02      | C28 |       |       |      | CurveFitFailed              |
| tetB-01      | C28 | 27.36 | 79.58 | 1.95 |                             |
| tetB-02      | C28 | 26.09 | 79.7  | 2.01 |                             |
| tetC-01      | C28 | 26.57 | 75.26 | 1.96 |                             |
| tetC-02      | C28 | 25.57 | 76.13 | 2.06 |                             |
| tetD-01      | C28 |       |       |      | LowEfficiency, CtIsSmall, C |
| tetD-02      | C28 |       |       |      | NoAmplification             |
| tetE         | C28 | 35.32 | 86.24 | 1.89 |                             |
| tetG-01      | C28 | 43.01 | 82.43 | 1.69 | MultipleMeltPeaks           |
| tetG-02      | C28 |       |       |      | BadR2, LowEfficiency, CtIsS |
| tetH         | C28 |       |       |      | NoAmplification             |
| tetJ         | C28 |       |       |      | LowEfficiency, CtIsSmall, C |
| tetK         | C28 |       |       |      | LowEfficiency, CtIsSmall, S |
| tetL-01      | C28 |       |       |      | NoAmplification             |
| tetL-02      | C28 | 35.2  | 85.26 | 1.71 |                             |
| tetM-01      | C28 | 21.76 | 75.91 | 2.04 |                             |
| tetM-02      | C28 | 21.85 | 77.66 | 2.08 |                             |
| tetO-01      | C28 | 21.84 | 76.86 | 2.04 |                             |
| tetPA        | C28 |       |       |      | NoAmplification             |
| tetPB-01     | C28 |       |       |      | NoAmplification             |
| tetPB-02     | C28 | 30.46 | 84.85 | 1.92 |                             |
| tetPB-03     | C28 |       |       |      | LowEfficiency, CtIsSmall, S |
| tetPB-05     | C28 |       |       |      | LowEfficiency, CtIsSmall, S |
| tetQ         | C28 | 26.18 | 76.76 | 2.05 |                             |
| tetR-02      | C28 | 33.36 | 79.93 | 1.88 | MultipleMeltPeaks           |
| tetR-03      | C28 | 27.31 | 76.11 | 2    |                             |
| tetS         | C28 | 38.37 | 78.61 | 1.96 |                             |

|             |     |       |       |      |                                          |
|-------------|-----|-------|-------|------|------------------------------------------|
| tetT        | C28 |       |       |      | NoAmplification                          |
| tetU-01     | C28 |       |       |      | NoAmplification                          |
| tetV        | C28 |       |       |      | CurveFitFailed                           |
| tetW-01     | C28 | 26.85 | 81.78 | 2.02 |                                          |
| tetX        | C28 |       |       |      | LowEfficiency, CtIsSmall, S <sub>e</sub> |
| tnpA-01     | C28 |       |       |      | LowEfficiency, CtIsSmall, S <sub>e</sub> |
| tnpA-02     | C28 | 35.74 | 84.49 | 1.71 |                                          |
| tnpA-03     | C28 | 29.01 | 77.9  | 2.04 |                                          |
| tnpA-04     | C28 |       |       |      | CurveFitFailed                           |
| tnpA-05     | C28 | 29.58 | 80.77 | 1.92 |                                          |
| tnpA-07     | C28 |       |       |      | NoAmplification                          |
| tolC-01     | C28 |       |       |      | LowEfficiency, CtIsSmall, S <sub>e</sub> |
| tolC-02     | C28 | 31.15 | 87.62 | 1.94 |                                          |
| tolC-03     | C28 | 32.45 | 84.33 | 1.95 |                                          |
| Tp614       | C28 |       |       |      | CurveFitFailed                           |
| ttgA        | C28 |       |       |      | LowEfficiency, CtIsSmall, S <sub>e</sub> |
| ttgB        | C28 |       |       |      | CurveFitFailed                           |
| vanA        | C28 |       |       |      | NoAmplification                          |
| vanB-01     | C28 | 34.86 | 81.26 | 1.9  |                                          |
| vanC-01     | C28 |       |       |      | NoAmplification                          |
| vanC-02     | C28 |       |       |      | LowEfficiency, CtIsSmall, C <sub>i</sub> |
| vanC-03     | C28 | 30.24 | 86.07 | 1.89 |                                          |
| vanC1       | C28 |       |       |      | NoAmplification                          |
| vanC2/vanC3 | C28 | 43.57 | 79.62 | 1.67 | MultipleMeltPeaks                        |
| vanG        | C28 |       |       |      | CurveFitFailed                           |
| vanHB       | C28 |       |       |      | NoAmplification                          |
| vanHD       | C28 | 39.2  | 74.02 | 1.85 |                                          |
| vanRA-01    | C28 |       |       |      | NoAmplification                          |
| vanRA-02    | C28 |       |       |      | NoAmplification                          |
| vanRB       | C28 | 35.61 | 83.4  | 1.84 |                                          |
| vanRC       | C28 |       |       |      | LowEfficiency, CtIsSmall, S <sub>e</sub> |
| vanRC4      | C28 |       |       |      | LowEfficiency, CtIsSmall, S <sub>e</sub> |
| vanRD       | C28 |       |       |      | NoAmplification                          |
| vanSA       | C28 |       |       |      | LowEfficiency, CtIsSmall, S <sub>e</sub> |
| vanSB       | C28 | 31.28 | 74.19 | 1.95 |                                          |
| vanSC-01    | C28 | 37.7  | 84.16 | 2.05 |                                          |
| vanSC-02    | C28 |       |       |      | NoAmplification                          |
| vanTC-01    | C28 |       |       |      | LowEfficiency, CtIsSmall, S <sub>e</sub> |
| vanTC-02    | C28 |       |       |      | NoAmplification                          |
| vanTE       | C28 |       |       |      | NoAmplification                          |
| vanTG       | C28 |       |       |      | NoAmplification                          |
| vanWB       | C28 |       |       |      | NoAmplification                          |
| vanWG       | C28 | 35.75 | 74.3  | 1.95 |                                          |
| vanXA       | C28 |       |       |      | NoAmplification                          |
| vanXB       | C28 |       |       |      | NoAmplification                          |
| vanXD       | C28 | 31.29 | 75.47 | 2.03 |                                          |

|              |     |       |       |      |                              |
|--------------|-----|-------|-------|------|------------------------------|
| vanYB        | C28 |       |       |      | CurveFitFailed               |
| vanYD-01     | C28 | 35.83 | 81.09 | 1.88 |                              |
| vanYD-02     | C28 |       |       |      | NoAmplification              |
| vatB-01      | C28 |       |       |      | NoAmplification              |
| vatB-02      | C28 |       |       |      | LowEfficiency, CtIsSmall, S: |
| vatC-01      | C28 |       |       |      | LowEfficiency, CtIsSmall, Ct |
| vatC-02      | C28 |       |       |      | CurveFitFailed               |
| vatE-01      | C28 | 31.11 | 75.62 | 2.05 |                              |
| vatE-02      | C28 | 38.55 | 75.48 | 1.81 |                              |
| vgaA-01      | C28 | 34.25 | 82.99 | 1.94 |                              |
| vgaA-02      | C28 |       |       |      | LowEfficiency, CtIsSmall, S: |
| vgb-01       | C28 |       |       |      | CurveFitFailed               |
| vgbB-01      | C28 |       |       |      | LowEfficiency, CtIsSmall, S: |
| vgbB-02      | C28 |       |       |      | NoAmplification              |
| yceE/mdtG-0  | C28 | 37.63 | 81.08 | 1.88 |                              |
| yceE/mdtG-0  | C28 |       |       |      | NoAmplification              |
| yceL/mdtH-0  | C28 | 31.52 | 88.67 | 1.95 |                              |
| yceL/mdtH-0  | C28 |       |       |      | NoAmplification              |
| yceL/mdtH-0  | C28 | 43.22 | 77.94 | 1.75 | MultipleMeltPeaks            |
| yidY/mdtL-01 | C28 | 30.5  | 88.65 | 1.99 |                              |
| yidY/mdtL-02 | C28 |       |       |      | CurveFitFailed               |

| Assay          | Sample | Ct | Tm    | Efficiency | Flags                     |
|----------------|--------|----|-------|------------|---------------------------|
| 16S rRNA       | C29    |    | 20.81 | 82.22      | 1.98                      |
| aac            | C29    |    | 34.01 | 78.06      | 1.66 MultipleMeltPeaks    |
| aac(6')-Ib(akz | C29    |    |       |            | NoAmplification           |
| aac(6')-Ib(akz | C29    |    | 39.99 | 82.17      | 1.74 MultipleMeltPeaks    |
| aac(6')-Ib(akz | C29    |    |       |            | CurveFitFailed            |
| aac(6')-II     | C29    |    |       |            | CtIsLarge, CurveFitFailed |
| aac(6')I1      | C29    |    |       |            | NoAmplification           |
| aacA/aphD      | C29    |    |       |            | NoAmplification           |
| aacC           | C29    |    | 37.71 | 89.99      | 1.71 MultipleMeltPeaks    |
| aacC1          | C29    |    |       |            | NoAmplification           |
| aacC2          | C29    |    |       |            | NoAmplification           |
| aacC4          | C29    |    |       |            | NoAmplification           |
| aadA-01        | C29    |    |       |            | NoAmplification           |
| aadA-02        | C29    |    |       |            | NoAmplification           |
| aadA-1-01      | C29    |    |       |            | NoAmplification           |
| aadA-1-02      | C29    |    |       |            | NoAmplification           |
| aadA1          | C29    |    |       |            | NoAmplification           |
| aadA2-01       | C29    |    |       |            | NoAmplification           |
| aadA2-02       | C29    |    |       |            | NoAmplification           |
| aadA2-03       | C29    |    |       |            | NoAmplification           |
| aadA5-01       | C29    |    |       |            | NoAmplification           |
| aadA5-02       | C29    |    | 34.93 | 83.82      | 1.92                      |
| aadA9-01       | C29    |    | 39.49 | 87.66      | 1.66                      |
| aadA9-02       | C29    |    |       |            | NoAmplification           |
| aadD           | C29    |    |       |            | NoAmplification           |
| aadE           | C29    |    |       |            | NoAmplification           |
| acrA-01        | C29    |    | 31.44 | 82.53      | 1.96 MultipleMeltPeaks    |
| acrA-02        | C29    |    |       |            | CurveFitFailed            |
| acrA-03        | C29    |    |       |            | NoAmplification           |
| acrA-04        | C29    |    | 36.7  | 80.39      | 1.86                      |
| acrA-05        | C29    |    | 34.43 | 80.01      | 1.91                      |
| acrB-01        | C29    |    |       |            | NoAmplification           |
| acrF           | C29    |    |       |            | CurveFitFailed            |
| acrR-01        | C29    |    |       |            | CurveFitFailed            |
| acrR-02        | C29    |    | 32.4  | 74.57      | 2                         |
| Actin          | C29    |    | 24.22 | 87.02      | 1.96 MultipleMeltPeaks    |
| adeA           | C29    |    |       |            | NoAmplification           |
| ampC-01        | C29    |    | 38.93 | 87.62      | 1.66 MultipleMeltPeaks    |
| ampC-02        | C29    |    |       |            | NoAmplification           |
| ampC-04        | C29    |    |       |            | CurveFitFailed            |
| ampC-05        | C29    |    |       |            | NoAmplification           |
| ampC-06        | C29    |    | 41.25 | 84.18      | 1.76 MultipleMeltPeaks    |
| ampC-07        | C29    |    |       |            | NoAmplification           |
| ampC-09        | C29    |    |       |            | NoAmplification           |
| ampC/blaDH     | C29    |    | 32.36 | 77.06      | 2                         |

|                          |     |       |       |      |                   |
|--------------------------|-----|-------|-------|------|-------------------|
| aph                      | C29 |       |       |      | NoAmplification   |
| aph(2')-Id-01            | C29 |       |       |      | NoAmplification   |
| aph(2')-Id-02            | C29 |       |       |      | NoAmplification   |
| aph6ia                   | C29 | 36.25 | 82.99 | 1.83 |                   |
| aphA1(aka k <sub>z</sub> | C29 |       |       |      | NoAmplification   |
| bacA-01                  | C29 |       |       |      | NoAmplification   |
| bacA-02                  | C29 |       |       |      | NoAmplification   |
| BETA-globin              | C29 | 25.35 | 84.07 | 1.97 |                   |
| bla-ACC-1                | C29 |       |       |      | NoAmplification   |
| bla-L1                   | C29 | 32.25 | 84.87 | 2.03 |                   |
| bla1                     | C29 |       |       |      | NoAmplification   |
| blaCMY                   | C29 | 38.63 | 80.46 | 2.02 | MultipleMeltPeaks |
| blaCMY2-01               | C29 |       |       |      | NoAmplification   |
| blaCMY2-02               | C29 | 33.22 | 82.73 | 1.96 |                   |
| blaCTX-M-01              | C29 | 39.16 | 75.93 | 2.03 |                   |
| blaCTX-M-02              | C29 |       |       |      | NoAmplification   |
| blaCTX-M-03              | C29 | 42.9  | 78.81 | 1.75 |                   |
| blaCTX-M-04              | C29 | 35.3  | 81.34 | 1.93 |                   |
| blaCTX-M-05              | C29 | 32.23 | 76.46 | 1.83 |                   |
| blaCTX-M-06              | C29 |       |       |      | NoAmplification   |
| blaGES                   | C29 |       |       |      | NoAmplification   |
| blaIMP-01                | C29 |       |       |      | NoAmplification   |
| blaIMP-02                | C29 |       |       |      | NoAmplification   |
| blaMOX/blaC              | C29 |       |       |      | NoAmplification   |
| blaOCH                   | C29 |       |       |      | NoAmplification   |
| blaOKP                   | C29 |       |       |      | NoAmplification   |
| blaOXA1/blaC             | C29 |       |       |      | NoAmplification   |
| blaOXA10-01              | C29 |       |       |      | NoAmplification   |
| blaOXA10-02              | C29 |       |       |      | NoAmplification   |
| blaOXY                   | C29 |       |       |      | NoAmplification   |
| blaPAO                   | C29 |       |       |      | NoAmplification   |
| blaPER                   | C29 |       |       |      | NoAmplification   |
| blaPSE                   | C29 |       |       |      | NoAmplification   |
| blaROB                   | C29 |       |       |      | NoAmplification   |
| blaSFO                   | C29 | 39.29 | 78.38 | 1.81 |                   |
| blaSHV-01                | C29 |       |       |      | NoAmplification   |
| blaSHV-02                | C29 |       |       |      | NoAmplification   |
| blaTEM                   | C29 |       |       |      | NoAmplification   |
| blaTLA                   | C29 |       |       |      | NoAmplification   |
| blaVEB                   | C29 |       |       |      | NoAmplification   |
| blaVIM                   | C29 |       |       |      | NoAmplification   |
| blaZ                     | C29 |       |       |      | NoAmplification   |
| carB                     | C29 |       |       |      | CurveFitFailed    |
| catA1                    | C29 |       |       |      | NoAmplification   |
| catB3                    | C29 |       |       |      | NoAmplification   |
| catB8                    | C29 | 34.24 | 81.21 | 1.9  |                   |

|            |     |       |       |      |                              |
|------------|-----|-------|-------|------|------------------------------|
| ceoA       | C29 | 29.31 | 82.36 | 1.94 |                              |
| cepA       | C29 |       |       |      | NoAmplification              |
| cfiA       | C29 |       |       |      | NoAmplification              |
| cfr        | C29 | 35.31 | 76.07 | 1.93 |                              |
| cfxA       | C29 | 27.07 | 77.41 | 2    |                              |
| cmeA       | C29 | 37.71 | 71.07 | 1.92 | MultipleMeltPeaks            |
| cmlA1-01   | C29 |       |       |      | NoAmplification              |
| cmlA1-02   | C29 | 39.78 | 61.95 | 1.79 | MultipleMeltPeaks            |
| cmr        | C29 |       |       |      | CurveFitFailed               |
| cmx(A)     | C29 | 27.87 | 89.66 | 1.93 |                              |
| cphA-01    | C29 |       |       |      | NoAmplification              |
| cphA-02    | C29 |       |       |      | CurveFitFailed               |
| dfrA1      | C29 |       |       |      | NoAmplification              |
| dfrA12     | C29 |       |       |      | NoAmplification              |
| emrD       | C29 | 39.36 | 86.84 | 1.63 | MultipleMeltPeaks            |
| ereA       | C29 |       |       |      | NoAmplification              |
| ereB       | C29 |       |       |      | NoAmplification              |
| erm(34)    | C29 |       |       |      | NoAmplification              |
| erm(35)    | C29 |       |       |      | NoAmplification              |
| erm(36)    | C29 |       |       |      | NoAmplification              |
| ermA       | C29 |       |       |      | NoAmplification              |
| ermA/ermTR | C29 |       |       |      | NoAmplification              |
| ermB       | C29 | 27.53 | 75.01 | 2.09 |                              |
| ermC       | C29 | 28.39 | 75.58 | 2.02 |                              |
| ermF       | C29 |       |       |      | NoAmplification              |
| ermJ/ermD  | C29 |       |       |      | NoAmplification              |
| ermK-01    | C29 |       |       |      | NoAmplification              |
| ermK-02    | C29 |       |       |      | NoAmplification              |
| ermT-01    | C29 |       |       |      | NoAmplification              |
| ermT-02    | C29 |       |       |      | NoAmplification              |
| ermX       | C29 |       |       |      | NoAmplification              |
| ermY       | C29 |       |       |      | NoAmplification              |
| fabK       | C29 | 25.63 | 77.91 | 2.14 |                              |
| floR       | C29 |       |       |      | NoAmplification              |
| folA       | C29 |       |       |      | NoAmplification              |
| fosB       | C29 |       |       |      | LowEfficiency, CtIsSmall, S: |
| fosX       | C29 |       |       |      | NoAmplification              |
| fox5       | C29 | 30.33 | 86.02 | 1.92 | MultipleMeltPeaks            |
| imiR       | C29 |       |       |      | NoAmplification              |
| ImrA-01    | C29 |       |       |      | NoAmplification              |
| intl       | C29 | 31.82 | 84.73 | 1.94 |                              |
| intl1      | C29 | 24.33 | 84.25 | 1.95 | MultipleMeltPeaks            |
| IS613      | C29 |       |       |      | NoAmplification              |
| lnuA-01    | C29 |       |       |      | NoAmplification              |
| lnuB-01    | C29 |       |       |      | NoAmplification              |
| lnuB-02    | C29 |       |       |      | NoAmplification              |

|                |     |       |       |      |                   |
|----------------|-----|-------|-------|------|-------------------|
| lnuC           | C29 |       |       |      | NoAmplification   |
| marR-01        | C29 | 42.5  | 85.52 | 1.69 |                   |
| matA/mel       | C29 | 24.02 | 77.58 | 2.05 |                   |
| mdet1          | C29 |       |       |      | NoAmplification   |
| mdtA           | C29 |       |       |      | NoAmplification   |
| mdtE/yhiU      | C29 |       |       |      | NoAmplification   |
| mecA           | C29 |       |       |      | NoAmplification   |
| mefA           | C29 | 22.75 | 80.47 | 1.98 |                   |
| mepA           | C29 | 33.31 | 87.05 | 1.97 | MultipleMeltPeaks |
| mexA           | C29 |       |       |      | NoAmplification   |
| mexD           | C29 | 38.26 | 79.8  | 2.07 |                   |
| mexE           | C29 |       |       |      | NoAmplification   |
| mexF           | C29 | 33.83 | 81.09 | 1.98 | MultipleMeltPeaks |
| mphA-01        | C29 | 36.3  | 79.56 | 1.87 | MultipleMeltPeaks |
| mphA-02        | C29 |       |       |      | NoAmplification   |
| mphB           | C29 | 39.04 | 72.59 | 1.62 |                   |
| mphC           | C29 |       |       |      | NoAmplification   |
| msrA-01        | C29 |       |       |      | NoAmplification   |
| msrC-01        | C29 |       |       |      | NoAmplification   |
| mtrC-01        | C29 |       |       |      | NoAmplification   |
| mtrC-02        | C29 |       |       |      | NoAmplification   |
| mtrD-02        | C29 | 30.9  | 81.17 | 1.96 |                   |
| mtrD-03        | C29 |       |       |      | NoAmplification   |
| NDM1           | C29 |       |       |      | NoAmplification   |
| nimE           | C29 | 38.29 | 74.75 | 2.12 |                   |
| nisB           | C29 |       |       |      | CurveFitFailed    |
| oleC           | C29 |       |       |      | CurveFitFailed    |
| oprD           | C29 | 30.24 | 82.38 | 1.95 |                   |
| oprJ           | C29 | 34.76 | 80.72 | 1.98 |                   |
| pbp            | C29 |       |       |      | NoAmplification   |
| pbp2x          | C29 | 26.26 | 75.32 | 1.75 |                   |
| Pbp5           | C29 |       |       |      | NoAmplification   |
| penA           | C29 |       |       |      | NoAmplification   |
| pikR1          | C29 |       |       |      | NoAmplification   |
| pikR2          | C29 | 34.18 | 84.6  | 1.99 |                   |
| pmrA           | C29 | 25.94 | 79.66 | 2.08 |                   |
| pncA           | C29 | 37.38 | 61.23 | 2.31 | MultipleMeltPeaks |
| putative multi | C29 | 39.86 | 77.51 | 1.83 | MultipleMeltPeaks |
| qac            | C29 |       |       |      | NoAmplification   |
| qacA           | C29 |       |       |      | NoAmplification   |
| qacA/qacB      | C29 |       |       |      | NoAmplification   |
| qacEdelta1-0   | C29 |       |       |      | NoAmplification   |
| qacEdelta1-0   | C29 | 33.22 | 80.63 | 1.98 |                   |
| qacH-01        | C29 | 37.66 | 81.94 | 1.94 |                   |
| qacH-02        | C29 | 43.97 | 61.42 | 1.51 | MultipleMeltPeaks |
| qnrA           | C29 | 35.33 | 73.82 | 2.05 |                   |



|              |     |       |       |                 |
|--------------|-----|-------|-------|-----------------|
| rarD-02      | C29 |       |       | NoAmplification |
| sat4         | C29 |       |       | NoAmplification |
| sdeB         | C29 |       |       | NoAmplification |
| spcN-01      | C29 |       |       | NoAmplification |
| speA         | C29 |       |       | NoAmplification |
| str          | C29 |       |       | NoAmplification |
| strA         | C29 |       |       | NoAmplification |
| strB         | C29 |       |       | NoAmplification |
| sul1         | C29 |       |       | NoAmplification |
| sul2         | C29 |       |       | NoAmplification |
| sulA/foIP-01 | C29 | 24.01 | 81.87 | 2               |
| sulA/foIP-03 | C29 | 25.55 | 83.12 | 1.98            |
| tet(32)      | C29 | 29.54 | 80.89 | 1.98            |
| tet(34)      | C29 | 29.88 | 75.82 | 2.02            |
| tet(35)      | C29 |       |       | NoAmplification |
| tet(36)-A    | C29 |       |       | NoAmplification |
| tet(36)-B    | C29 |       |       | NoAmplification |
| tet(37)      | C29 | 28.61 | 76.33 | 1.99            |
| tetA-01      | C29 | 30.03 | 84.9  | 1.94            |
| tetA-02      | C29 |       |       | NoAmplification |
| tetB-01      | C29 |       |       | NoAmplification |
| tetB-02      | C29 |       |       | NoAmplification |
| tetC-01      | C29 |       |       | NoAmplification |
| tetC-02      | C29 |       |       | NoAmplification |
| tetD-01      | C29 |       |       | NoAmplification |
| tetD-02      | C29 | 39.27 | 76.14 | 1.84            |
| tetE         | C29 |       |       | NoAmplification |
| tetG-01      | C29 |       |       | CurveFitFailed  |
| tetG-02      | C29 |       |       | CurveFitFailed  |
| tetH         | C29 |       |       | NoAmplification |
| tetJ         | C29 |       |       | NoAmplification |
| tetK         | C29 |       |       | NoAmplification |
| tetL-01      | C29 |       |       | NoAmplification |
| tetL-02      | C29 | 33.87 | 85.21 | 1.8             |
| tetM-01      | C29 | 26.14 | 75.99 | 1.99            |
| tetM-02      | C29 | 24.28 | 77.65 | 2.02            |
| tetO-01      | C29 | 28    | 76.69 | 2.02            |
| tetPA        | C29 |       |       | NoAmplification |
| tetPB-01     | C29 |       |       | NoAmplification |
| tetPB-02     | C29 |       |       | CurveFitFailed  |
| tetPB-03     | C29 |       |       | NoAmplification |
| tetPB-05     | C29 |       |       | NoAmplification |
| tetQ         | C29 |       |       | NoAmplification |
| tetR-02      | C29 | 35.25 | 87.11 | 1.87            |
| tetR-03      | C29 |       |       | NoAmplification |
| tetS         | C29 |       |       | NoAmplification |

|             |     |       |       |      |                   |
|-------------|-----|-------|-------|------|-------------------|
| tetT        | C29 |       |       |      | NoAmplification   |
| tetU-01     | C29 |       |       |      | NoAmplification   |
| tetV        | C29 |       |       |      | NoAmplification   |
| tetW-01     | C29 | 29.05 | 81.61 | 1.99 |                   |
| tetX        | C29 |       |       |      | NoAmplification   |
| tnpA-01     | C29 |       |       |      | NoAmplification   |
| tnpA-02     | C29 | 38.12 | 84.42 | 1.66 |                   |
| tnpA-03     | C29 | 32.82 | 75.07 | 2.1  |                   |
| tnpA-04     | C29 |       |       |      | NoAmplification   |
| tnpA-05     | C29 |       |       |      | NoAmplification   |
| tnpA-07     | C29 |       |       |      | NoAmplification   |
| tolC-01     | C29 |       |       |      | NoAmplification   |
| tolC-02     | C29 | 36.11 | 87.83 | 1.79 |                   |
| tolC-03     | C29 | 33.61 | 85.94 | 1.9  |                   |
| Tp614       | C29 |       |       |      | CurveFitFailed    |
| ttgA        | C29 |       |       |      | NoAmplification   |
| ttgB        | C29 |       |       |      | NoAmplification   |
| vanA        | C29 |       |       |      | NoAmplification   |
| vanB-01     | C29 |       |       |      | CurveFitFailed    |
| vanC-01     | C29 |       |       |      | NoAmplification   |
| vanC-02     | C29 |       |       |      | NoAmplification   |
| vanC-03     | C29 | 32.46 | 88.38 | 1.9  | MultipleMeltPeaks |
| vanC1       | C29 |       |       |      | NoAmplification   |
| vanC2/vanC3 | C29 |       |       |      | CurveFitFailed    |
| vanG        | C29 |       |       |      | NoAmplification   |
| vanHB       | C29 |       |       |      | NoAmplification   |
| vanHD       | C29 |       |       |      | NoAmplification   |
| vanRA-01    | C29 |       |       |      | NoAmplification   |
| vanRA-02    | C29 |       |       |      | NoAmplification   |
| vanRB       | C29 |       |       |      | NoAmplification   |
| vanRC       | C29 |       |       |      | NoAmplification   |
| vanRC4      | C29 |       |       |      | NoAmplification   |
| vanRD       | C29 |       |       |      | NoAmplification   |
| vanSA       | C29 |       |       |      | NoAmplification   |
| vanSB       | C29 | 30.35 | 74.24 | 1.98 |                   |
| vanSC-01    | C29 |       |       |      | CurveFitFailed    |
| vanSC-02    | C29 |       |       |      | NoAmplification   |
| vanTC-01    | C29 |       |       |      | NoAmplification   |
| vanTC-02    | C29 |       |       |      | NoAmplification   |
| vanTE       | C29 |       |       |      | NoAmplification   |
| vanTG       | C29 |       |       |      | NoAmplification   |
| vanWB       | C29 |       |       |      | NoAmplification   |
| vanWG       | C29 | 34.75 | 74.77 | 1.97 |                   |
| vanXA       | C29 |       |       |      | NoAmplification   |
| vanXB       | C29 |       |       |      | NoAmplification   |
| vanXD       | C29 | 29.92 | 75.05 | 2.06 |                   |

|              |     |       |       |      |                 |
|--------------|-----|-------|-------|------|-----------------|
| vanYB        | C29 |       |       |      | NoAmplification |
| vanYD-01     | C29 | 35.99 | 81.03 | 1.85 |                 |
| vanYD-02     | C29 |       |       |      | NoAmplification |
| vatB-01      | C29 |       |       |      | NoAmplification |
| vatB-02      | C29 |       |       |      | NoAmplification |
| vatC-01      | C29 |       |       |      | NoAmplification |
| vatC-02      | C29 |       |       |      | NoAmplification |
| vatE-01      | C29 | 33.98 | 76.2  | 2.06 |                 |
| vatE-02      | C29 |       |       |      | NoAmplification |
| vgaA-01      | C29 |       |       |      | NoAmplification |
| vgaA-02      | C29 |       |       |      | NoAmplification |
| vgb-01       | C29 |       |       |      | NoAmplification |
| vgbB-01      | C29 |       |       |      | NoAmplification |
| vgbB-02      | C29 |       |       |      | NoAmplification |
| yceE/mdtG-0  | C29 |       |       |      | NoAmplification |
| yceE/mdtG-0  | C29 |       |       |      | NoAmplification |
| yceL/mdtH-0  | C29 | 31.59 | 84.25 | 1.95 |                 |
| yceL/mdtH-0  | C29 |       |       |      | NoAmplification |
| yceL/mdtH-0  | C29 | 37.32 | 86.77 | 1.72 |                 |
| yidY/mdtL-01 | C29 |       |       |      | CurveFitFailed  |
| yidY/mdtL-02 | C29 |       |       |      | NoAmplification |

| Assay          | Sample | Ct | Tm    | Efficiency | Flags                     |
|----------------|--------|----|-------|------------|---------------------------|
| 16S rRNA       | C30    |    | 20.37 | 82.12      | 1.96                      |
| aac            | C30    |    | 30.34 | 81.57      | 1.76 MultipleMeltPeaks    |
| aac(6')-Ib(akz | C30    |    |       |            | NoAmplification           |
| aac(6')-Ib(akz | C30    |    | 36    | 81.92      | 1.88                      |
| aac(6')-Ib(akz | C30    |    | 33.36 | 78.66      | 1.96 MultipleMeltPeaks    |
| aac(6')-II     | C30    |    | 34.1  | 83.64      | 1.86                      |
| aac(6')I1      | C30    |    |       |            | NoAmplification           |
| aacA/aphD      | C30    |    |       |            | NoAmplification           |
| aacC           | C30    |    | 36.72 | 86.38      | 1.83 MultipleMeltPeaks    |
| aacC1          | C30    |    |       |            | NoAmplification           |
| aacC2          | C30    |    |       |            | NoAmplification           |
| aacC4          | C30    |    |       |            | NoAmplification           |
| aadA-01        | C30    |    |       |            | NoAmplification           |
| aadA-02        | C30    |    | 33.75 | 80.37      | 1.96                      |
| aadA-1-01      | C30    |    |       |            | NoAmplification           |
| aadA-1-02      | C30    |    |       |            | NoAmplification           |
| aadA1          | C30    |    | 38.6  | 83.58      | 1.85                      |
| aadA2-01       | C30    |    |       |            | NoAmplification           |
| aadA2-02       | C30    |    |       |            | NoAmplification           |
| aadA2-03       | C30    |    |       |            | NoAmplification           |
| aadA5-01       | C30    |    |       |            | NoAmplification           |
| aadA5-02       | C30    |    | 31.9  | 77.88      | 2 MultipleMeltPeaks       |
| aadA9-01       | C30    |    |       |            | CtIsLarge, CurveFitFailed |
| aadA9-02       | C30    |    |       |            | NoAmplification           |
| aadD           | C30    |    |       |            | NoAmplification           |
| aadE           | C30    |    |       |            | NoAmplification           |
| acrA-01        | C30    |    | 31.6  | 88.82      | 1.98                      |
| acrA-02        | C30    |    |       |            | NoAmplification           |
| acrA-03        | C30    |    |       |            | NoAmplification           |
| acrA-04        | C30    |    | 29.94 | 81.11      | 1.99                      |
| acrA-05        | C30    |    | 31.12 | 79.73      | 1.95 MultipleMeltPeaks    |
| acrB-01        | C30    |    |       |            | NoAmplification           |
| acrF           | C30    |    | 28.92 | 82.93      | 1.82                      |
| acrR-01        | C30    |    | 38.08 | 81.42      | 1.77 MultipleMeltPeaks    |
| acrR-02        | C30    |    | 44.55 | 86.55      | 1.61 MultipleMeltPeaks    |
| Actin          | C30    |    | 21.67 | 86.86      | 1.97                      |
| adeA           | C30    |    | 35.81 | 76.94      | 1.91                      |
| ampC-01        | C30    |    | 33.74 | 84.81      | 2.01                      |
| ampC-02        | C30    |    | 38.55 | 82.71      | 1.93 MultipleMeltPeaks    |
| ampC-04        | C30    |    | 32.66 | 87.06      | 1.6                       |
| ampC-05        | C30    |    |       |            | NoAmplification           |
| ampC-06        | C30    |    |       |            | NoAmplification           |
| ampC-07        | C30    |    | 34.67 | 88.39      | 1.81                      |
| ampC-09        | C30    |    |       |            | NoAmplification           |
| ampC/blaDH     | C30    |    | 31    | 85.02      | 1.95 MultipleMeltPeaks    |

|                          |     |       |       |      |                              |
|--------------------------|-----|-------|-------|------|------------------------------|
| aph                      | C30 |       |       |      | LowEfficiency, CtIsSmall, Ct |
| aph(2')-Id-01            | C30 |       |       |      | NoAmplification              |
| aph(2')-Id-02            | C30 |       |       |      | NoAmplification              |
| aph6ia                   | C30 |       |       |      | CurveFitFailed               |
| aphA1(aka k <sub>z</sub> | C30 |       |       |      | LowEfficiency, CtIsSmall, Se |
| bacA-01                  | C30 |       |       |      | NoAmplification              |
| bacA-02                  | C30 | 33.37 | 81.15 | 2.05 |                              |
| BETA-globin              | C30 | 22.85 | 84.14 | 1.99 |                              |
| bla-ACC-1                | C30 | 35.89 | 78.83 | 1.81 | MultipleMeltPeaks            |
| bla-L1                   | C30 | 31.79 | 85.58 | 2    |                              |
| bla1                     | C30 |       |       |      | LowEfficiency, CtIsSmall, Ct |
| blaCMY                   | C30 |       |       |      | NoAmplification              |
| blaCMY2-01               | C30 |       |       |      | NoAmplification              |
| blaCMY2-02               | C30 | 31.76 | 85.47 | 1.97 | MultipleMeltPeaks            |
| blaCTX-M-01              | C30 |       |       |      | NoAmplification              |
| blaCTX-M-02              | C30 |       |       |      | NoAmplification              |
| blaCTX-M-03              | C30 |       |       |      | NoAmplification              |
| blaCTX-M-04              | C30 |       |       |      | CtIsLarge, CurveFitFailed    |
| blaCTX-M-05              | C30 | 31.65 | 77.12 | 1.86 |                              |
| blaCTX-M-06              | C30 |       |       |      | NoAmplification              |
| blaGES                   | C30 |       |       |      | NoAmplification              |
| blaIMP-01                | C30 |       |       |      | NoAmplification              |
| blaIMP-02                | C30 |       |       |      | CurveFitFailed               |
| blaMOX/blaC              | C30 |       |       |      | NoAmplification              |
| blaOCH                   | C30 |       |       |      | NoAmplification              |
| blaOKP                   | C30 |       |       |      | NoAmplification              |
| blaOXA1/blaC             | C30 |       |       |      | NoAmplification              |
| blaOXA10-01              | C30 |       |       |      | NoAmplification              |
| blaOXA10-02              | C30 |       |       |      | NoAmplification              |
| blaOXY                   | C30 |       |       |      | CtIsLarge, CurveFitFailed    |
| blaPAO                   | C30 |       |       |      | NoAmplification              |
| blaPER                   | C30 |       |       |      | BadR2, LowEfficiency, CtIsS  |
| blaPSE                   | C30 |       |       |      | NoAmplification              |
| blaROB                   | C30 | 40.19 | 62.68 | 1.69 | MultipleMeltPeaks            |
| blaSFO                   | C30 | 35.25 | 86.29 | 1.9  | MultipleMeltPeaks            |
| blaSHV-01                | C30 |       |       |      | NoAmplification              |
| blaSHV-02                | C30 |       |       |      | NoAmplification              |
| blaTEM                   | C30 |       |       |      | NoAmplification              |
| blaTLA                   | C30 |       |       |      | NoAmplification              |
| blaVEB                   | C30 |       |       |      | NoAmplification              |
| blaVIM                   | C30 |       |       |      | NoAmplification              |
| blaZ                     | C30 |       |       |      | NoAmplification              |
| carB                     | C30 | 38.33 | 82.64 | 1.8  |                              |
| catA1                    | C30 |       |       |      | NoAmplification              |
| catB3                    | C30 | 35.79 | 87.54 | 1.86 | MultipleMeltPeaks            |
| catB8                    | C30 | 30.44 | 81.93 | 1.99 |                              |

|            |     |       |       |      |                              |
|------------|-----|-------|-------|------|------------------------------|
| ceoA       | C30 | 28.14 | 82.26 | 1.96 |                              |
| cepA       | C30 |       |       |      | NoAmplification              |
| cfiA       | C30 | 35.96 | 79.45 | 1.91 | MultipleMeltPeaks            |
| cfr        | C30 |       |       |      | LowEfficiency, CtIsSmall, Ct |
| cfxA       | C30 | 28.03 | 77.5  | 1.99 |                              |
| cmeA       | C30 |       |       |      | CurveFitFailed               |
| cmlA1-01   | C30 |       |       |      | NoAmplification              |
| cmlA1-02   | C30 |       |       |      | NoAmplification              |
| cmr        | C30 |       |       |      | LowEfficiency, CtIsSmall, Se |
| cmx(A)     | C30 | 29.31 | 84.54 | 1.94 | MultipleMeltPeaks            |
| cphA-01    | C30 | 39.35 | 81.37 | 1.8  | MultipleMeltPeaks            |
| cphA-02    | C30 | 38.43 | 81.59 | 1.8  |                              |
| dfrA1      | C30 |       |       |      | NoAmplification              |
| dfrA12     | C30 |       |       |      | NoAmplification              |
| emrD       | C30 |       |       |      | NoAmplification              |
| ereA       | C30 | 33.14 | 83.3  | 2    |                              |
| ereB       | C30 | 33.64 | 85.65 | 2.1  |                              |
| erm(34)    | C30 |       |       |      | NoAmplification              |
| erm(35)    | C30 |       |       |      | NoAmplification              |
| erm(36)    | C30 |       |       |      | NoAmplification              |
| ermA       | C30 |       |       |      | LowEfficiency, CtIsSmall, Ct |
| ermA/ermTR | C30 |       |       |      | NoAmplification              |
| ermB       | C30 |       |       |      | LowEfficiency, CtIsSmall, Ct |
| ermC       | C30 | 39.69 | 85.4  | 1.83 | MultipleMeltPeaks            |
| ermF       | C30 | 28.5  | 74.46 | 2.02 |                              |
| ermJ/ermD  | C30 |       |       |      | NoAmplification              |
| ermK-01    | C30 |       |       |      | NoAmplification              |
| ermK-02    | C30 |       |       |      | NoAmplification              |
| ermT-01    | C30 |       |       |      | NoAmplification              |
| ermT-02    | C30 |       |       |      | NoAmplification              |
| ermX       | C30 |       |       |      | NoAmplification              |
| ermY       | C30 |       |       |      | NoAmplification              |
| fabK       | C30 | 25.46 | 78.81 | 2.07 |                              |
| floR       | C30 |       |       |      | NoAmplification              |
| folA       | C30 |       |       |      | NoAmplification              |
| fosB       | C30 |       |       |      | LowEfficiency, CtIsSmall, Se |
| fosX       | C30 |       |       |      | NoAmplification              |
| fox5       | C30 | 30.74 | 86.35 | 1.77 |                              |
| imiR       | C30 |       |       |      | NoAmplification              |
| ImrA-01    | C30 | 38.26 | 79.49 | 1.8  | MultipleMeltPeaks            |
| intl       | C30 | 30.43 | 84.75 | 1.96 |                              |
| intl1      | C30 | 22.89 | 86.64 | 1.95 | MultipleMeltPeaks            |
| IS613      | C30 |       |       |      | BadR2, LowEfficiency, CtIsS  |
| lnuA-01    | C30 |       |       |      | LowEfficiency, CtIsSmall, Se |
| lnuB-01    | C30 |       |       |      | LowEfficiency, CtIsSmall, Ct |
| lnuB-02    | C30 |       |       |      | NoAmplification              |

|               |     |       |       |      |                              |
|---------------|-----|-------|-------|------|------------------------------|
| lnuC          | C30 | 34.11 | 87.48 | 1.84 |                              |
| marR-01       | C30 | 35.81 | 85.26 | 1.87 |                              |
| matA/mel      | C30 | 24.68 | 77.55 | 2.04 |                              |
| mdet1         | C30 |       |       |      | NoAmplification              |
| mdtA          | C30 |       |       |      | CurveFitFailed               |
| mdtE/yhiU     | C30 | 36.06 | 80.48 | 1.96 |                              |
| mecA          | C30 |       |       |      | NoAmplification              |
| mefA          | C30 | 24.1  | 80.46 | 1.96 |                              |
| mepA          | C30 | 35.09 | 78.48 | 1.89 |                              |
| mexA          | C30 |       |       |      | NoAmplification              |
| mexD          | C30 | 33.1  | 80.27 | 2.02 |                              |
| mexE          | C30 |       |       |      | NoAmplification              |
| mexF          | C30 | 32.67 | 81.08 | 1.72 | MultipleMeltPeaks            |
| mphA-01       | C30 | 29.53 | 86.28 | 1.96 |                              |
| mphA-02       | C30 | 32.88 | 77.05 | 1.65 |                              |
| mphB          | C30 |       |       |      | NoAmplification              |
| mphC          | C30 | 39.08 | 84.25 | 1.73 | MultipleMeltPeaks            |
| msrA-01       | C30 |       |       |      | NoAmplification              |
| msrC-01       | C30 |       |       |      | NoAmplification              |
| mtrC-01       | C30 |       |       |      | NoAmplification              |
| mtrC-02       | C30 | 44.53 | 62.78 | 1.7  | MultipleMeltPeaks            |
| mtrD-02       | C30 | 28.9  | 81.17 | 1.97 | MultipleMeltPeaks            |
| mtrD-03       | C30 |       |       |      | NoAmplification              |
| NDM1          | C30 |       |       |      | NoAmplification              |
| nimE          | C30 |       |       |      | NoAmplification              |
| nisB          | C30 |       |       |      | NoAmplification              |
| oleC          | C30 |       |       |      | NoAmplification              |
| oprD          | C30 | 28.79 | 82.01 | 1.98 |                              |
| oprJ          | C30 | 37.8  | 86.41 | 1.79 | MultipleMeltPeaks            |
| pbp           | C30 |       |       |      | LowEfficiency, CtisSmall, Se |
| pbp2x         | C30 |       |       |      | NoAmplification              |
| Pbp5          | C30 |       |       |      | NoAmplification              |
| penA          | C30 |       |       |      | NoAmplification              |
| pikR1         | C30 |       |       |      | NoAmplification              |
| pikR2         | C30 | 31.77 | 84.84 | 1.98 |                              |
| pmrA          | C30 | 25.35 | 79.3  | 2.08 |                              |
| pncA          | C30 | 37.99 | 62.24 | 2.21 | MultipleMeltPeaks            |
| putative mulI | C30 |       |       |      | NoAmplification              |
| qac           | C30 | 38.82 | 79.09 | 1.85 |                              |
| qacA          | C30 |       |       |      | NoAmplification              |
| qacA/qacB     | C30 | 35.86 | 85.56 | 1.99 |                              |
| qacEdelta1-0  | C30 |       |       |      | NoAmplification              |
| qacEdelta1-0  | C30 | 29.61 | 76.85 | 1.96 |                              |
| qacH-01       | C30 | 38.22 | 82.27 | 1.86 | MultipleMeltPeaks            |
| qacH-02       | C30 | 35.06 | 84.08 | 1.66 |                              |
| qnrA          | C30 | 44.98 | 61.86 | 1.52 | BadR2, MultipleMeltPeaks     |

|              |     |       |       |      |                              |
|--------------|-----|-------|-------|------|------------------------------|
| rarD-02      | C30 | 37.76 | 84.57 | 1.78 |                              |
| sat4         | C30 |       |       |      | NoAmplification              |
| sdeB         | C30 |       |       |      | LowEfficiency, CtIsSmall, Se |
| spcN-01      | C30 |       |       |      | CtIsSmall, CurveFitFailed, H |
| speA         | C30 |       |       |      | NoAmplification              |
| str          | C30 |       |       |      | NoAmplification              |
| strA         | C30 |       |       |      | NoAmplification              |
| strB         | C30 |       |       |      | NoAmplification              |
| sul1         | C30 |       |       |      | NoAmplification              |
| sul2         | C30 |       |       |      | NoAmplification              |
| sulA/foIP-01 | C30 | 22.98 | 81.46 | 2.04 |                              |
| sulA/foIP-03 | C30 | 23.8  | 83.95 | 2    |                              |
| tet(32)      | C30 | 28.76 | 81.01 | 2    |                              |
| tet(34)      | C30 | 36.7  | 74.41 | 1.84 |                              |
| tet(35)      | C30 |       |       |      | NoAmplification              |
| tet(36)-A    | C30 |       |       |      | NoAmplification              |
| tet(36)-B    | C30 |       |       |      | NoAmplification              |
| tet(37)      | C30 | 32.59 | 84.52 | 1.93 | MultipleMeltPeaks            |
| tetA-01      | C30 | 30.57 | 85.06 | 1.91 |                              |
| tetA-02      | C30 | 41.78 | 62.76 | 1.71 | MultipleMeltPeaks            |
| tetB-01      | C30 | 29.88 | 86.31 | 1.95 |                              |
| tetB-02      | C30 |       |       |      | LowEfficiency, CtIsSmall, Ct |
| tetC-01      | C30 |       |       |      | NoAmplification              |
| tetC-02      | C30 | 28.42 | 76.06 | 2.07 |                              |
| tetD-01      | C30 |       |       |      | NoAmplification              |
| tetD-02      | C30 |       |       |      | NoAmplification              |
| tetE         | C30 |       |       |      | NoAmplification              |
| tetG-01      | C30 | 34.46 | 82.29 | 1.92 |                              |
| tetG-02      | C30 | 41.74 | 82.67 | 1.8  | MultipleMeltPeaks            |
| tetH         | C30 |       |       |      | NoAmplification              |
| tetJ         | C30 |       |       |      | CtIsLarge, CurveFitFailed    |
| tetK         | C30 |       |       |      | LowEfficiency, CtIsSmall, Ct |
| tetL-01      | C30 |       |       |      | NoAmplification              |
| tetL-02      | C30 | 33.92 | 85.22 | 1.77 |                              |
| tetM-01      | C30 | 26.2  | 76.09 | 2.02 |                              |
| tetM-02      | C30 | 28.47 | 77.58 | 2.04 |                              |
| tetO-01      | C30 |       |       |      | NoAmplification              |
| tetPA        | C30 |       |       |      | NoAmplification              |
| tetPB-01     | C30 |       |       |      | NoAmplification              |
| tetPB-02     | C30 | 33.66 | 84.89 | 2.06 |                              |
| tetPB-03     | C30 |       |       |      | NoAmplification              |
| tetPB-05     | C30 |       |       |      | NoAmplification              |
| tetQ         | C30 |       |       |      | NoAmplification              |
| tetR-02      | C30 | 35.47 | 81.05 | 1.84 | MultipleMeltPeaks            |
| tetR-03      | C30 |       |       |      | NoAmplification              |
| tetS         | C30 |       |       |      | LowEfficiency, CtIsSmall, Ct |



|             |     |       |       |      |                              |
|-------------|-----|-------|-------|------|------------------------------|
| tetT        | C30 |       |       |      | NoAmplification              |
| tetU-01     | C30 |       |       |      | NoAmplification              |
| tetV        | C30 |       |       |      | NoAmplification              |
| tetW-01     | C30 |       |       |      | CurveFitFailed               |
| tetX        | C30 |       |       |      | NoAmplification              |
| tnpA-01     | C30 |       |       |      | LowEfficiency, CtIsSmall, Se |
| tnpA-02     | C30 | 33.15 | 85.2  | 1.82 |                              |
| tnpA-03     | C30 | 28.14 | 77.76 | 2.06 |                              |
| tnpA-04     | C30 |       |       |      | NoAmplification              |
| tnpA-05     | C30 |       |       |      | NoAmplification              |
| tnpA-07     | C30 |       |       |      | NoAmplification              |
| tolC-01     | C30 |       |       |      | LowEfficiency, CtIsSmall, Se |
| tolC-02     | C30 | 30.84 | 89.3  | 1.94 | MultipleMeltPeaks            |
| tolC-03     | C30 | 33.83 | 85.82 | 1.95 |                              |
| Tp614       | C30 | 33.55 | 83.24 | 1.96 |                              |
| ttgA        | C30 |       |       |      | CurveFitFailed               |
| ttgB        | C30 | 37.97 | 80.79 | 1.83 | MultipleMeltPeaks            |
| vanA        | C30 |       |       |      | NoAmplification              |
| vanB-01     | C30 | 37.37 | 88.18 | 1.65 | MultipleMeltPeaks            |
| vanC-01     | C30 |       |       |      | NoAmplification              |
| vanC-02     | C30 |       |       |      | NoAmplification              |
| vanC-03     | C30 | 31    | 84.95 | 1.91 |                              |
| vanC1       | C30 |       |       |      | NoAmplification              |
| vanC2/vanC3 | C30 | 35.9  | 84.71 | 1.93 |                              |
| vanG        | C30 |       |       |      | LowEfficiency, CtIsSmall, Se |
| vanHB       | C30 | 38.15 | 62.79 | 1.79 | MultipleMeltPeaks            |
| vanHD       | C30 |       |       |      | NoAmplification              |
| vanRA-01    | C30 |       |       |      | NoAmplification              |
| vanRA-02    | C30 |       |       |      | NoAmplification              |
| vanRB       | C30 | 38.81 | 87.12 | 1.72 |                              |
| vanRC       | C30 |       |       |      | NoAmplification              |
| vanRC4      | C30 |       |       |      | NoAmplification              |
| vanRD       | C30 |       |       |      | NoAmplification              |
| vanSA       | C30 |       |       |      | NoAmplification              |
| vanSB       | C30 | 30.32 | 74.26 | 1.94 |                              |
| vanSC-01    | C30 | 38.74 | 77.95 | 1.87 | MultipleMeltPeaks            |
| vanSC-02    | C30 |       |       |      | NoAmplification              |
| vanTC-01    | C30 |       |       |      | NoAmplification              |
| vanTC-02    | C30 |       |       |      | NoAmplification              |
| vanTE       | C30 |       |       |      | NoAmplification              |
| vanTG       | C30 |       |       |      | CtIsSmall, CurveFitFailed    |
| vanWB       | C30 |       |       |      | NoAmplification              |
| vanWG       | C30 | 37.85 | 74.07 | 1.88 |                              |
| vanXA       | C30 |       |       |      | NoAmplification              |
| vanXB       | C30 |       |       |      | NoAmplification              |
| vanXD       | C30 | 31.81 | 75.07 | 2.05 |                              |

|              |     |       |       |      |                              |
|--------------|-----|-------|-------|------|------------------------------|
| vanYB        | C30 |       |       |      | CtIsLarge, CurveFitFailed    |
| vanYD-01     | C30 | 35.47 | 82.9  | 1.84 | MultipleMeltPeaks            |
| vanYD-02     | C30 |       |       |      | NoAmplification              |
| vatB-01      | C30 |       |       |      | NoAmplification              |
| vatB-02      | C30 | 38.46 | 78.62 | 1.81 | MultipleMeltPeaks            |
| vatC-01      | C30 |       |       |      | NoAmplification              |
| vatC-02      | C30 | 38.01 | 87.58 | 1.77 |                              |
| vatE-01      | C30 | 31.32 | 76.67 | 2.06 |                              |
| vatE-02      | C30 | 36.24 | 75.79 | 2    |                              |
| vgaA-01      | C30 |       |       |      | NoAmplification              |
| vgaA-02      | C30 |       |       |      | LowEfficiency, CtIsSmall, Se |
| vgb-01       | C30 | 34.09 | 83.86 | 1.93 |                              |
| vgbB-01      | C30 |       |       |      | NoAmplification              |
| vgbB-02      | C30 |       |       |      | NoAmplification              |
| yceE/mdtG-0  | C30 | 33.78 | 77.57 | 2.06 |                              |
| yceE/mdtG-0  | C30 |       |       |      | NoAmplification              |
| yceL/mdtH-0  | C30 | 34.47 | 85.46 | 1.89 |                              |
| yceL/mdtH-0  | C30 |       |       |      | NoAmplification              |
| yceL/mdtH-0  | C30 | 43.46 | 81.37 | 1.73 | MultipleMeltPeaks            |
| yidY/mdtL-01 | C30 | 30.8  | 82.78 | 1.98 |                              |
| yidY/mdtL-02 | C30 |       |       |      | CurveFitFailed               |



CurveFitFailed, HighBaseline

SaturationBaselineRatiosLow, CurveFitFailed, HighBaseline

CurveFitFailed, HighBaseline

Small, SaturationBaselineRatiosLow, CurveFitFailed, HighBaseline

CurveFitFailed, HighBaseline

SaturationBaselineRatiosLow, CurveFitFailed, HighBaseline

CurveFitFailed, HighBaseline

CurveFitFailed, HighBaseline

SaturationBaselineRatiosLow, CurveFitFailed

Small, CurveFitFailed, HighBaseline

SaturationBaselineRatiosLow, CurveFitFailed, HighBaseline

CurveFitFailed, HighBaseline

aturationBaselineRatiolsLow, CurveFitFailed

aturationBaselineRatiolsLow, CurveFitFailed  
lighBaseline

urveFitFailed, HighBaseline

urveFitFailed, HighBaseline

urveFitFailed, HighBaseline

aturationBaselineRatiolsLow, CurveFitFailed

aturationBaselineRatiolsLow, CurveFitFailed

aturationBaselineRatiolsLow, CurveFitFailed, HighBaseline



aturationBaselineRatiosLow, CurveFitFailed, HighBaseline

| Assay          | Sample     | Ct    | Tm    | Efficiency | Flags             |
|----------------|------------|-------|-------|------------|-------------------|
| 16S rRNA       | BAL_CASE01 |       | 17.06 | 81.28      | 1.87              |
| aac            | BAL_CASE01 |       |       |            | NoAmplification   |
| aac(6')-Ib(akz | BAL_CASE01 |       |       |            | NoAmplification   |
| aac(6')-Ib(akz | BAL_CASE01 | 29.63 | 86.07 | 2.01       |                   |
| aac(6')-Ib(akz | BAL_CASE01 |       |       |            | NoAmplification   |
| aac(6')-II     | BAL_CASE01 |       |       |            | NoAmplification   |
| aac(6')I1      | BAL_CASE01 |       |       |            | NoAmplification   |
| aacA/aphD      | BAL_CASE01 |       |       |            | NoAmplification   |
| aacC           | BAL_CASE01 | 31.41 | 91.99 | 1.82       |                   |
| aacC1          | BAL_CASE01 |       |       |            | NoAmplification   |
| aacC2          | BAL_CASE01 |       |       |            | NoAmplification   |
| aacC4          | BAL_CASE01 |       |       |            | NoAmplification   |
| aadA-01        | BAL_CASE01 |       |       |            | NoAmplification   |
| aadA-02        | BAL_CASE01 |       |       |            | NoAmplification   |
| aadA-1-01      | BAL_CASE01 |       |       |            | NoAmplification   |
| aadA-1-02      | BAL_CASE01 |       |       |            | NoAmplification   |
| aadA1          | BAL_CASE01 | 30.18 | 84.5  | 2.04       |                   |
| aadA2-01       | BAL_CASE01 |       |       |            | CurveFitFailed    |
| aadA2-02       | BAL_CASE01 |       |       |            | NoAmplification   |
| aadA2-03       | BAL_CASE01 |       |       |            | NoAmplification   |
| aadA5-01       | BAL_CASE01 | 30.75 | 88.63 | 1.85       |                   |
| aadA5-02       | BAL_CASE01 | 30.5  | 88.59 | 1.95       |                   |
| aadA9-01       | BAL_CASE01 |       |       |            | NoAmplification   |
| aadA9-02       | BAL_CASE01 |       |       |            | NoAmplification   |
| aadD           | BAL_CASE01 |       |       |            | NoAmplification   |
| aadE           | BAL_CASE01 |       |       |            | NoAmplification   |
| acrA-01        | BAL_CASE01 | 29.93 | 88.74 | 1.89       |                   |
| acrA-02        | BAL_CASE01 |       |       |            | NoAmplification   |
| acrA-03        | BAL_CASE01 |       |       |            | NoAmplification   |
| acrA-04        | BAL_CASE01 | 28.73 | 80.36 | 1.85       | MultipleMeltPeaks |
| acrA-05        | BAL_CASE01 | 32.13 | 88.72 | 1.85       |                   |
| acrB-01        | BAL_CASE01 |       |       |            | NoAmplification   |
| acrF           | BAL_CASE01 | 30.59 | 85.27 | 1.87       | MultipleMeltPeaks |
| acrR-01        | BAL_CASE01 |       |       |            | NoAmplification   |
| acrR-02        | BAL_CASE01 |       |       |            | NoAmplification   |
| Actin          | BAL_CASE01 | 18.75 | 87.07 | 1.85       |                   |
| adeA           | BAL_CASE01 |       |       |            | NoAmplification   |
| ampC-01        | BAL_CASE01 | 30.37 | 88.02 | 1.99       | MultipleMeltPeaks |
| ampC-02        | BAL_CASE01 |       |       |            | NoAmplification   |
| ampC-04        | BAL_CASE01 |       |       |            | NoAmplification   |
| ampC-05        | BAL_CASE01 |       |       |            | NoAmplification   |
| ampC-06        | BAL_CASE01 | 32.67 | 84.22 | 1.88       |                   |
| ampC-07        | BAL_CASE01 | 31.64 | 88.6  | 1.86       |                   |
| ampC-09        | BAL_CASE01 |       |       |            | NoAmplification   |
| ampC/blaDH     | BAL_CASE01 |       |       |            | NoAmplification   |

|                          |            |       |       |      |                   |
|--------------------------|------------|-------|-------|------|-------------------|
| aph                      | BAL_CASE01 |       |       |      | NoAmplification   |
| aph(2')-Id-01            | BAL_CASE01 |       |       |      | NoAmplification   |
| aph(2')-Id-02            | BAL_CASE01 |       |       |      | NoAmplification   |
| aph6ia                   | BAL_CASE01 |       |       |      | NoAmplification   |
| aphA1(aka k <sub>z</sub> | BAL_CASE01 |       |       |      | NoAmplification   |
| bacA-01                  | BAL_CASE01 |       |       |      | NoAmplification   |
| bacA-02                  | BAL_CASE01 |       |       |      | NoAmplification   |
| BETA-globin              | BAL_CASE01 | 19.26 | 84.27 | 1.8  |                   |
| bla-ACC-1                | BAL_CASE01 | 32.05 | 86.16 | 1.89 |                   |
| bla-L1                   | BAL_CASE01 |       |       |      | NoAmplification   |
| bla1                     | BAL_CASE01 |       |       |      | NoAmplification   |
| blaCMY                   | BAL_CASE01 |       |       |      | NoAmplification   |
| blaCMY2-01               | BAL_CASE01 |       |       |      | NoAmplification   |
| blaCMY2-02               | BAL_CASE01 | 27    | 84.8  | 1.93 | MultipleMeltPeaks |
| blaCTX-M-01              | BAL_CASE01 |       |       |      | NoAmplification   |
| blaCTX-M-02              | BAL_CASE01 |       |       |      | NoAmplification   |
| blaCTX-M-03              | BAL_CASE01 |       |       |      | NoAmplification   |
| blaCTX-M-04              | BAL_CASE01 | 32.36 | 92.44 | 2.01 | MultipleMeltPeaks |
| blaCTX-M-05              | BAL_CASE01 |       |       |      | NoAmplification   |
| blaCTX-M-06              | BAL_CASE01 |       |       |      | NoAmplification   |
| blaGES                   | BAL_CASE01 |       |       |      | NoAmplification   |
| blaIMP-01                | BAL_CASE01 |       |       |      | NoAmplification   |
| blaIMP-02                | BAL_CASE01 |       |       |      | NoAmplification   |
| blaMOX/blaC              | BAL_CASE01 |       |       |      | NoAmplification   |
| blaOCH                   | BAL_CASE01 |       |       |      | NoAmplification   |
| blaOKP                   | BAL_CASE01 |       |       |      | NoAmplification   |
| blaOXA1/blaC             | BAL_CASE01 |       |       |      | NoAmplification   |
| blaOXA10-01              | BAL_CASE01 |       |       |      | NoAmplification   |
| blaOXA10-02              | BAL_CASE01 |       |       |      | NoAmplification   |
| blaOXY                   | BAL_CASE01 |       |       |      | NoAmplification   |
| blaPAO                   | BAL_CASE01 |       |       |      | NoAmplification   |
| blaPER                   | BAL_CASE01 |       |       |      | NoAmplification   |
| blaPSE                   | BAL_CASE01 |       |       |      | NoAmplification   |
| blaROB                   | BAL_CASE01 |       |       |      | NoAmplification   |
| blaSFO                   | BAL_CASE01 | 30.26 | 89.94 | 1.95 |                   |
| blaSHV-01                | BAL_CASE01 |       |       |      | NoAmplification   |
| blaSHV-02                | BAL_CASE01 |       |       |      | NoAmplification   |
| blaTEM                   | BAL_CASE01 |       |       |      | NoAmplification   |
| blaTLA                   | BAL_CASE01 |       |       |      | NoAmplification   |
| blaVEB                   | BAL_CASE01 |       |       |      | NoAmplification   |
| blaVIM                   | BAL_CASE01 |       |       |      | NoAmplification   |
| blaZ                     | BAL_CASE01 |       |       |      | NoAmplification   |
| carB                     | BAL_CASE01 |       |       |      | NoAmplification   |
| catA1                    | BAL_CASE01 |       |       |      | NoAmplification   |
| catB3                    | BAL_CASE01 |       |       |      | NoAmplification   |
| catB8                    | BAL_CASE01 | 29.32 | 84.59 | 2    | MultipleMeltPeaks |

|            |            |       |       |      |                   |
|------------|------------|-------|-------|------|-------------------|
| ceoA       | BAL_CASE01 | 28.99 | 82.12 | 1.92 | MultipleMeltPeaks |
| cepA       | BAL_CASE01 |       |       |      | NoAmplification   |
| cfiA       | BAL_CASE01 |       |       |      | NoAmplification   |
| cfr        | BAL_CASE01 |       |       |      | NoAmplification   |
| cfxA       | BAL_CASE01 | 22.39 | 77.46 | 1.82 |                   |
| cmeA       | BAL_CASE01 |       |       |      | NoAmplification   |
| cmlA1-01   | BAL_CASE01 |       |       |      | NoAmplification   |
| cmlA1-02   | BAL_CASE01 |       |       |      | NoAmplification   |
| cmr        | BAL_CASE01 |       |       |      | NoAmplification   |
| cmx(A)     | BAL_CASE01 | 27.82 | 86.7  | 1.98 |                   |
| cphA-01    | BAL_CASE01 | 29.49 | 85.95 | 1.96 | MultipleMeltPeaks |
| cphA-02    | BAL_CASE01 | 32.51 | 82.33 | 1.91 |                   |
| dfrA1      | BAL_CASE01 |       |       |      | NoAmplification   |
| dfrA12     | BAL_CASE01 |       |       |      | NoAmplification   |
| emrD       | BAL_CASE01 |       |       |      | NoAmplification   |
| ereA       | BAL_CASE01 |       |       |      | NoAmplification   |
| ereB       | BAL_CASE01 | 34.09 | 85.84 | 2.03 |                   |
| erm(34)    | BAL_CASE01 |       |       |      | NoAmplification   |
| erm(35)    | BAL_CASE01 |       |       |      | NoAmplification   |
| erm(36)    | BAL_CASE01 |       |       |      | NoAmplification   |
| ermA       | BAL_CASE01 |       |       |      | NoAmplification   |
| ermA/ermTR | BAL_CASE01 |       |       |      | NoAmplification   |
| ermB       | BAL_CASE01 |       |       |      | NoAmplification   |
| ermC       | BAL_CASE01 |       |       |      | NoAmplification   |
| ermF       | BAL_CASE01 |       |       |      | NoAmplification   |
| ermJ/ermD  | BAL_CASE01 |       |       |      | NoAmplification   |
| ermK-01    | BAL_CASE01 | 32.58 | 75.07 | 1.96 |                   |
| ermK-02    | BAL_CASE01 | 31.89 | 86.45 | 1.78 |                   |
| ermT-01    | BAL_CASE01 |       |       |      | NoAmplification   |
| ermT-02    | BAL_CASE01 |       |       |      | NoAmplification   |
| ermX       | BAL_CASE01 | 28.22 | 83.6  | 1.73 |                   |
| ermY       | BAL_CASE01 |       |       |      | NoAmplification   |
| fabK       | BAL_CASE01 | 22.87 | 77.39 | 2.08 |                   |
| floR       | BAL_CASE01 |       |       |      | NoAmplification   |
| folA       | BAL_CASE01 |       |       |      | NoAmplification   |
| fosB       | BAL_CASE01 |       |       |      | NoAmplification   |
| fosX       | BAL_CASE01 |       |       |      | NoAmplification   |
| fox5       | BAL_CASE01 | 26.85 | 86.46 | 1.72 |                   |
| imiR       | BAL_CASE01 |       |       |      | NoAmplification   |
| ImrA-01    | BAL_CASE01 |       |       |      | NoAmplification   |
| intl       | BAL_CASE01 | 29.76 | 84.96 | 1.93 |                   |
| intl1      | BAL_CASE01 | 19.05 | 87.82 | 1.87 |                   |
| IS613      | BAL_CASE01 | 24.69 | 79.45 | 1.58 |                   |
| lnuA-01    | BAL_CASE01 |       |       |      | NoAmplification   |
| lnuB-01    | BAL_CASE01 |       |       |      | NoAmplification   |
| lnuB-02    | BAL_CASE01 |       |       |      | NoAmplification   |

|               |            |       |       |      |                   |
|---------------|------------|-------|-------|------|-------------------|
| lnuC          | BAL_CASE01 |       |       |      | NoAmplification   |
| marR-01       | BAL_CASE01 |       |       |      | NoAmplification   |
| matA/mel      | BAL_CASE01 | 26.04 | 77.03 | 1.98 | MultipleMeltPeaks |
| mdet1         | BAL_CASE01 |       |       |      | NoAmplification   |
| mdtA          | BAL_CASE01 |       |       |      | NoAmplification   |
| mdtE/yhiU     | BAL_CASE01 |       |       |      | NoAmplification   |
| mecA          | BAL_CASE01 |       |       |      | NoAmplification   |
| mefA          | BAL_CASE01 | 25.59 | 80.49 | 1.85 |                   |
| mepA          | BAL_CASE01 | 31.41 | 85.22 | 1.97 |                   |
| mexA          | BAL_CASE01 |       |       |      | NoAmplification   |
| mexD          | BAL_CASE01 |       |       |      | NoAmplification   |
| mexE          | BAL_CASE01 | 34.99 | 87.85 | 1.83 |                   |
| mexF          | BAL_CASE01 | 27.94 | 84.31 | 2.04 | MultipleMeltPeaks |
| mphA-01       | BAL_CASE01 | 30.23 | 86.89 | 1.84 | MultipleMeltPeaks |
| mphA-02       | BAL_CASE01 |       |       |      | CurveFitFailed    |
| mphB          | BAL_CASE01 |       |       |      | NoAmplification   |
| mphC          | BAL_CASE01 |       |       |      | NoAmplification   |
| msrA-01       | BAL_CASE01 |       |       |      | NoAmplification   |
| msrC-01       | BAL_CASE01 |       |       |      | NoAmplification   |
| mtrC-01       | BAL_CASE01 |       |       |      | NoAmplification   |
| mtrC-02       | BAL_CASE01 | 31.54 | 84.42 | 1.95 |                   |
| mtrD-02       | BAL_CASE01 | 26.56 | 81.99 | 1.8  |                   |
| mtrD-03       | BAL_CASE01 |       |       |      | NoAmplification   |
| NDM1          | BAL_CASE01 |       |       |      | NoAmplification   |
| nimE          | BAL_CASE01 |       |       |      | NoAmplification   |
| nisB          | BAL_CASE01 |       |       |      | NoAmplification   |
| oleC          | BAL_CASE01 |       |       |      | NoAmplification   |
| oprD          | BAL_CASE01 | 27.96 | 86.78 | 1.94 |                   |
| oprJ          | BAL_CASE01 |       |       |      | NoAmplification   |
| pbp           | BAL_CASE01 |       |       |      | NoAmplification   |
| pbp2x         | BAL_CASE01 |       |       |      | NoAmplification   |
| Pbp5          | BAL_CASE01 |       |       |      | NoAmplification   |
| penA          | BAL_CASE01 |       |       |      | NoAmplification   |
| pikR1         | BAL_CASE01 |       |       |      | NoAmplification   |
| pikR2         | BAL_CASE01 | 28.51 | 85.08 | 2.06 |                   |
| pmrA          | BAL_CASE01 | 23.26 | 79.91 | 1.97 |                   |
| pncA          | BAL_CASE01 |       |       |      | NoAmplification   |
| putative mulI | BAL_CASE01 |       |       |      | NoAmplification   |
| qac           | BAL_CASE01 |       |       |      | NoAmplification   |
| qacA          | BAL_CASE01 |       |       |      | NoAmplification   |
| qacA/qacB     | BAL_CASE01 |       |       |      | NoAmplification   |
| qacEdelta1-0  | BAL_CASE01 |       |       |      | NoAmplification   |
| qacEdelta1-0  | BAL_CASE01 |       |       |      | NoAmplification   |
| qacH-01       | BAL_CASE01 | 29.32 | 86.21 | 1.96 | MultipleMeltPeaks |
| qacH-02       | BAL_CASE01 |       |       |      | NoAmplification   |
| qnrA          | BAL_CASE01 |       |       |      | NoAmplification   |

|              |            |       |       |      |                   |
|--------------|------------|-------|-------|------|-------------------|
| rarD-02      | BAL_CASE01 |       |       |      | NoAmplification   |
| sat4         | BAL_CASE01 |       |       |      | NoAmplification   |
| sdeB         | BAL_CASE01 |       |       |      | NoAmplification   |
| spcN-01      | BAL_CASE01 |       |       |      | NoAmplification   |
| speA         | BAL_CASE01 |       |       |      | NoAmplification   |
| str          | BAL_CASE01 |       |       |      | NoAmplification   |
| strA         | BAL_CASE01 |       |       |      | NoAmplification   |
| strB         | BAL_CASE01 |       |       |      | NoAmplification   |
| sul1         | BAL_CASE01 |       |       |      | NoAmplification   |
| sul2         | BAL_CASE01 | 27.15 | 85.62 | 1.68 |                   |
| sulA/foIP-01 | BAL_CASE01 | 22.24 | 81.51 | 1.87 |                   |
| sulA/foIP-03 | BAL_CASE01 | 22.59 | 83.61 | 1.81 |                   |
| tet(32)      | BAL_CASE01 | 27.79 | 81.16 | 1.84 |                   |
| tet(34)      | BAL_CASE01 | 31.09 | 75.54 | 1.86 |                   |
| tet(35)      | BAL_CASE01 |       |       |      | NoAmplification   |
| tet(36)-A    | BAL_CASE01 |       |       |      | NoAmplification   |
| tet(36)-B    | BAL_CASE01 |       |       |      | NoAmplification   |
| tet(37)      | BAL_CASE01 | 26.05 | 76.25 | 1.86 |                   |
| tetA-01      | BAL_CASE01 |       |       |      | CurveFitFailed    |
| tetA-02      | BAL_CASE01 |       |       |      | NoAmplification   |
| tetB-01      | BAL_CASE01 | 28.46 | 86.23 | 1.82 | MultipleMeltPeaks |
| tetB-02      | BAL_CASE01 | 26.13 | 79.54 | 1.93 |                   |
| tetC-01      | BAL_CASE01 | 28.17 | 75    | 1.86 |                   |
| tetC-02      | BAL_CASE01 | 27.76 | 75.73 | 1.93 |                   |
| tetD-01      | BAL_CASE01 |       |       |      | NoAmplification   |
| tetD-02      | BAL_CASE01 |       |       |      | NoAmplification   |
| tetE         | BAL_CASE01 |       |       |      | NoAmplification   |
| tetG-01      | BAL_CASE01 |       |       |      | NoAmplification   |
| tetG-02      | BAL_CASE01 |       |       |      | NoAmplification   |
| tetH         | BAL_CASE01 |       |       |      | NoAmplification   |
| tetJ         | BAL_CASE01 |       |       |      | NoAmplification   |
| tetK         | BAL_CASE01 |       |       |      | NoAmplification   |
| tetL-01      | BAL_CASE01 |       |       |      | NoAmplification   |
| tetL-02      | BAL_CASE01 |       |       |      | NoAmplification   |
| tetM-01      | BAL_CASE01 | 22.12 | 76.06 | 1.86 |                   |
| tetM-02      | BAL_CASE01 | 21.9  | 77.48 | 1.91 |                   |
| tetO-01      | BAL_CASE01 |       |       |      | NoAmplification   |
| tetPA        | BAL_CASE01 |       |       |      | NoAmplification   |
| tetPB-01     | BAL_CASE01 |       |       |      | NoAmplification   |
| tetPB-02     | BAL_CASE01 | 29.34 | 84.73 | 1.84 |                   |
| tetPB-03     | BAL_CASE01 |       |       |      | NoAmplification   |
| tetPB-05     | BAL_CASE01 |       |       |      | NoAmplification   |
| tetQ         | BAL_CASE01 | 23.69 | 75.76 | 1.9  |                   |
| tetR-02      | BAL_CASE01 | 30.61 | 89.06 | 1.76 |                   |
| tetR-03      | BAL_CASE01 | 28.11 | 75.87 | 1.88 |                   |
| tetS         | BAL_CASE01 |       |       |      | NoAmplification   |

|             |            |       |       |      |                   |
|-------------|------------|-------|-------|------|-------------------|
| tetT        | BAL_CASE01 |       |       |      | NoAmplification   |
| tetU-01     | BAL_CASE01 |       |       |      | NoAmplification   |
| tetV        | BAL_CASE01 |       |       |      | NoAmplification   |
| tetW-01     | BAL_CASE01 |       |       |      | NoAmplification   |
| tetX        | BAL_CASE01 |       |       |      | NoAmplification   |
| tnpA-01     | BAL_CASE01 |       |       |      | NoAmplification   |
| tnpA-02     | BAL_CASE01 | 31.73 | 88.69 | 1.79 | MultipleMeltPeaks |
| tnpA-03     | BAL_CASE01 | 29.84 | 77.64 | 1.96 |                   |
| tnpA-04     | BAL_CASE01 |       |       |      | NoAmplification   |
| tnpA-05     | BAL_CASE01 |       |       |      | NoAmplification   |
| tnpA-07     | BAL_CASE01 |       |       |      | NoAmplification   |
| tolC-01     | BAL_CASE01 |       |       |      | NoAmplification   |
| tolC-02     | BAL_CASE01 | 31.92 | 87.79 | 1.97 | MultipleMeltPeaks |
| tolC-03     | BAL_CASE01 | 30.91 | 85.96 | 1.91 |                   |
| Tp614       | BAL_CASE01 |       |       |      | NoAmplification   |
| ttgA        | BAL_CASE01 |       |       |      | NoAmplification   |
| ttgB        | BAL_CASE01 |       |       |      | CurveFitFailed    |
| vanA        | BAL_CASE01 |       |       |      | NoAmplification   |
| vanB-01     | BAL_CASE01 |       |       |      | NoAmplification   |
| vanC-01     | BAL_CASE01 |       |       |      | NoAmplification   |
| vanC-02     | BAL_CASE01 |       |       |      | NoAmplification   |
| vanC-03     | BAL_CASE01 | 26.54 | 85.82 | 1.73 |                   |
| vanC1       | BAL_CASE01 | 30.95 | 83.07 | 1.88 |                   |
| vanC2/vanC3 | BAL_CASE01 |       |       |      | NoAmplification   |
| vanG        | BAL_CASE01 |       |       |      | NoAmplification   |
| vanHB       | BAL_CASE01 | 32.82 | 89.7  | 1.95 |                   |
| vanHD       | BAL_CASE01 |       |       |      | NoAmplification   |
| vanRA-01    | BAL_CASE01 |       |       |      | NoAmplification   |
| vanRA-02    | BAL_CASE01 |       |       |      | NoAmplification   |
| vanRB       | BAL_CASE01 |       |       |      | NoAmplification   |
| vanRC       | BAL_CASE01 |       |       |      | NoAmplification   |
| vanRC4      | BAL_CASE01 |       |       |      | NoAmplification   |
| vanRD       | BAL_CASE01 |       |       |      | NoAmplification   |
| vanSA       | BAL_CASE01 |       |       |      | NoAmplification   |
| vanSB       | BAL_CASE01 |       |       |      | NoAmplification   |
| vanSC-01    | BAL_CASE01 |       |       |      | NoAmplification   |
| vanSC-02    | BAL_CASE01 |       |       |      | NoAmplification   |
| vanTC-01    | BAL_CASE01 |       |       |      | NoAmplification   |
| vanTC-02    | BAL_CASE01 |       |       |      | NoAmplification   |
| vanTE       | BAL_CASE01 |       |       |      | NoAmplification   |
| vanTG       | BAL_CASE01 |       |       |      | NoAmplification   |
| vanWB       | BAL_CASE01 |       |       |      | NoAmplification   |
| vanWG       | BAL_CASE01 |       |       |      | NoAmplification   |
| vanXA       | BAL_CASE01 |       |       |      | NoAmplification   |
| vanXB       | BAL_CASE01 |       |       |      | NoAmplification   |
| vanXD       | BAL_CASE01 |       |       |      | NoAmplification   |

|              |            |       |       |      |                   |
|--------------|------------|-------|-------|------|-------------------|
| vanYB        | BAL_CASE01 |       |       |      | NoAmplification   |
| vanYD-01     | BAL_CASE01 |       |       |      | NoAmplification   |
| vanYD-02     | BAL_CASE01 |       |       |      | NoAmplification   |
| vatB-01      | BAL_CASE01 |       |       |      | NoAmplification   |
| vatB-02      | BAL_CASE01 |       |       |      | NoAmplification   |
| vatC-01      | BAL_CASE01 | 33.58 | 81.33 | 1.84 |                   |
| vatC-02      | BAL_CASE01 |       |       |      | NoAmplification   |
| vatE-01      | BAL_CASE01 |       |       |      | NoAmplification   |
| vatE-02      | BAL_CASE01 |       |       |      | NoAmplification   |
| vgaA-01      | BAL_CASE01 |       |       |      | NoAmplification   |
| vgaA-02      | BAL_CASE01 |       |       |      | NoAmplification   |
| vgb-01       | BAL_CASE01 |       |       |      | NoAmplification   |
| vgbB-01      | BAL_CASE01 |       |       |      | NoAmplification   |
| vgbB-02      | BAL_CASE01 |       |       |      | NoAmplification   |
| yceE/mdtG-0  | BAL_CASE01 |       |       |      | NoAmplification   |
| yceE/mdtG-0  | BAL_CASE01 |       |       |      | NoAmplification   |
| yceL/mdtH-0  | BAL_CASE01 | 30.43 | 86.34 | 1.79 | MultipleMeltPeaks |
| yceL/mdtH-0  | BAL_CASE01 |       |       |      | NoAmplification   |
| yceL/mdtH-0  | BAL_CASE01 |       |       |      | NoAmplification   |
| yidY/mdtL-01 | BAL_CASE01 | 31.25 | 85.82 | 2.01 | MultipleMeltPeaks |
| yidY/mdtL-02 | BAL_CASE01 |       |       |      | NoAmplification   |



| Assay          | Sample     | Ct | Tm    | Efficiency | Flags                  |
|----------------|------------|----|-------|------------|------------------------|
| 16S rRNA       | BAL_CASE02 |    | 21.24 | 82.08      | 1.95                   |
| aac            | BAL_CASE02 |    |       |            | NoAmplification        |
| aac(6')-Ib(akz | BAL_CASE02 |    |       |            | NoAmplification        |
| aac(6')-Ib(akz | BAL_CASE02 |    |       |            | CurveFitFailed         |
| aac(6')-Ib(akz | BAL_CASE02 |    |       |            | NoAmplification        |
| aac(6')-II     | BAL_CASE02 |    | 34.41 | 83.84      | 1.85                   |
| aac(6')I1      | BAL_CASE02 |    |       |            | NoAmplification        |
| aacA/aphD      | BAL_CASE02 |    |       |            | NoAmplification        |
| aacC           | BAL_CASE02 |    | 35.52 | 87.74      | 1.84                   |
| aacC1          | BAL_CASE02 |    |       |            | NoAmplification        |
| aacC2          | BAL_CASE02 |    |       |            | NoAmplification        |
| aacC4          | BAL_CASE02 |    |       |            | NoAmplification        |
| aadA-01        | BAL_CASE02 |    |       |            | NoAmplification        |
| aadA-02        | BAL_CASE02 |    |       |            | NoAmplification        |
| aadA-1-01      | BAL_CASE02 |    |       |            | NoAmplification        |
| aadA-1-02      | BAL_CASE02 |    |       |            | NoAmplification        |
| aadA1          | BAL_CASE02 |    | 37.22 | 83.5       | 1.81                   |
| aadA2-01       | BAL_CASE02 |    | 38.64 | 84         | 1.67 MultipleMeltPeaks |
| aadA2-02       | BAL_CASE02 |    | 32.33 | 75.39      | 2                      |
| aadA2-03       | BAL_CASE02 |    |       |            | NoAmplification        |
| aadA5-01       | BAL_CASE02 |    | 35.05 | 81.86      | 1.89                   |
| aadA5-02       | BAL_CASE02 |    | 34.99 | 77.82      | 1.92                   |
| aadA9-01       | BAL_CASE02 |    |       |            | NoAmplification        |
| aadA9-02       | BAL_CASE02 |    |       |            | NoAmplification        |
| aadD           | BAL_CASE02 |    |       |            | NoAmplification        |
| aadE           | BAL_CASE02 |    |       |            | NoAmplification        |
| acrA-01        | BAL_CASE02 |    | 33.54 | 88.76      | 1.86                   |
| acrA-02        | BAL_CASE02 |    |       |            | NoAmplification        |
| acrA-03        | BAL_CASE02 |    |       |            | NoAmplification        |
| acrA-04        | BAL_CASE02 |    | 30.51 | 80.47      | 1.97                   |
| acrA-05        | BAL_CASE02 |    | 32.38 | 80.36      | 1.92                   |
| acrB-01        | BAL_CASE02 |    |       |            | NoAmplification        |
| acrF           | BAL_CASE02 |    | 35.12 | 78.82      | 1.91 MultipleMeltPeaks |
| acrR-01        | BAL_CASE02 |    |       |            | NoAmplification        |
| acrR-02        | BAL_CASE02 |    | 35.5  | 83.3       | 1.85                   |
| Actin          | BAL_CASE02 |    | 21.88 | 87.13      | 1.93                   |
| adeA           | BAL_CASE02 |    | 33.89 | 84.02      | 1.87                   |
| ampC-01        | BAL_CASE02 |    | 36.24 | 82.19      | 1.81 MultipleMeltPeaks |
| ampC-02        | BAL_CASE02 |    |       |            | NoAmplification        |
| ampC-04        | BAL_CASE02 |    | 34.42 | 78.02      | 1.99                   |
| ampC-05        | BAL_CASE02 |    |       |            | NoAmplification        |
| ampC-06        | BAL_CASE02 |    |       |            | NoAmplification        |
| ampC-07        | BAL_CASE02 |    | 35.34 | 88.69      | 1.83                   |
| ampC-09        | BAL_CASE02 |    |       |            | NoAmplification        |
| ampC/blaDH     | BAL_CASE02 |    |       |            | NoAmplification        |

|                          |            |       |       |      |                   |
|--------------------------|------------|-------|-------|------|-------------------|
| aph                      | BAL_CASE02 |       |       |      | NoAmplification   |
| aph(2')-Id-01            | BAL_CASE02 |       |       |      | NoAmplification   |
| aph(2')-Id-02            | BAL_CASE02 |       |       |      | NoAmplification   |
| aph6ia                   | BAL_CASE02 | 41.34 | 78.05 | 1.73 | MultipleMeltPeaks |
| aphA1(aka k <sub>z</sub> | BAL_CASE02 |       |       |      | NoAmplification   |
| bacA-01                  | BAL_CASE02 |       |       |      | NoAmplification   |
| bacA-02                  | BAL_CASE02 | 36.65 | 83.43 | 1.73 | MultipleMeltPeaks |
| BETA-globin              | BAL_CASE02 | 23.06 | 84.27 | 1.93 |                   |
| bla-ACC-1                | BAL_CASE02 |       |       |      | NoAmplification   |
| bla-L1                   | BAL_CASE02 | 34.35 | 83.67 | 1.94 | MultipleMeltPeaks |
| bla1                     | BAL_CASE02 |       |       |      | NoAmplification   |
| blaCMY                   | BAL_CASE02 |       |       |      | NoAmplification   |
| blaCMY2-01               | BAL_CASE02 |       |       |      | NoAmplification   |
| blaCMY2-02               | BAL_CASE02 | 32.44 | 83.37 | 1.94 |                   |
| blaCTX-M-01              | BAL_CASE02 |       |       |      | NoAmplification   |
| blaCTX-M-02              | BAL_CASE02 |       |       |      | NoAmplification   |
| blaCTX-M-03              | BAL_CASE02 |       |       |      | CurveFitFailed    |
| blaCTX-M-04              | BAL_CASE02 |       |       |      | NoAmplification   |
| blaCTX-M-05              | BAL_CASE02 | 36.16 | 75.48 | 1.73 |                   |
| blaCTX-M-06              | BAL_CASE02 |       |       |      | NoAmplification   |
| blaGES                   | BAL_CASE02 |       |       |      | NoAmplification   |
| blaIMP-01                | BAL_CASE02 |       |       |      | NoAmplification   |
| blaIMP-02                | BAL_CASE02 | 36.36 | 74.89 | 1.9  |                   |
| blaMOX/blaC              | BAL_CASE02 |       |       |      | NoAmplification   |
| blaOCH                   | BAL_CASE02 |       |       |      | NoAmplification   |
| blaOKP                   | BAL_CASE02 |       |       |      | NoAmplification   |
| blaOXA1/blaC             | BAL_CASE02 |       |       |      | NoAmplification   |
| blaOXA10-01              | BAL_CASE02 |       |       |      | NoAmplification   |
| blaOXA10-02              | BAL_CASE02 |       |       |      | NoAmplification   |
| blaOXY                   | BAL_CASE02 | 39.55 | 87.37 | 1.68 | MultipleMeltPeaks |
| blaPAO                   | BAL_CASE02 |       |       |      | NoAmplification   |
| blaPER                   | BAL_CASE02 |       |       |      | NoAmplification   |
| blaPSE                   | BAL_CASE02 |       |       |      | NoAmplification   |
| blaROB                   | BAL_CASE02 |       |       |      | NoAmplification   |
| blaSFO                   | BAL_CASE02 | 34.17 | 87.71 | 1.91 |                   |
| blaSHV-01                | BAL_CASE02 |       |       |      | CurveFitFailed    |
| blaSHV-02                | BAL_CASE02 |       |       |      | NoAmplification   |
| blaTEM                   | BAL_CASE02 |       |       |      | NoAmplification   |
| blaTLA                   | BAL_CASE02 |       |       |      | NoAmplification   |
| blaVEB                   | BAL_CASE02 |       |       |      | NoAmplification   |
| blaVIM                   | BAL_CASE02 |       |       |      | NoAmplification   |
| blaZ                     | BAL_CASE02 |       |       |      | NoAmplification   |
| carB                     | BAL_CASE02 |       |       |      | NoAmplification   |
| catA1                    | BAL_CASE02 |       |       |      | NoAmplification   |
| catB3                    | BAL_CASE02 |       |       |      | NoAmplification   |
| catB8                    | BAL_CASE02 | 29.83 | 82.74 | 1.94 |                   |

|            |            |       |       |      |                              |
|------------|------------|-------|-------|------|------------------------------|
| ceoA       | BAL_CASE02 | 30.86 | 82.51 | 1.94 |                              |
| cepA       | BAL_CASE02 |       |       |      | NoAmplification              |
| cfiA       | BAL_CASE02 |       |       |      | NoAmplification              |
| cfr        | BAL_CASE02 |       |       |      | NoAmplification              |
| cfxA       | BAL_CASE02 | 22.6  | 77.45 | 1.82 |                              |
| cmeA       | BAL_CASE02 | 35.57 | 81.86 | 1.78 |                              |
| cmlA1-01   | BAL_CASE02 |       |       |      | NoAmplification              |
| cmlA1-02   | BAL_CASE02 |       |       |      | NoAmplification              |
| cmr        | BAL_CASE02 |       |       |      | NoAmplification              |
| cmx(A)     | BAL_CASE02 | 30.67 | 84.75 | 1.95 |                              |
| cphA-01    | BAL_CASE02 | 36.02 | 85.59 | 1.84 | MultipleMeltPeaks            |
| cphA-02    | BAL_CASE02 | 29.2  | 77.63 | 1.97 | MultipleMeltPeaks            |
| dfrA1      | BAL_CASE02 |       |       |      | NoAmplification              |
| dfrA12     | BAL_CASE02 |       |       |      | NoAmplification              |
| emrD       | BAL_CASE02 |       |       |      | NoAmplification              |
| ereA       | BAL_CASE02 | 36.84 | 82.47 | 1.84 |                              |
| ereB       | BAL_CASE02 | 37.81 | 85.91 | 1.76 | MultipleMeltPeaks            |
| erm(34)    | BAL_CASE02 |       |       |      | NoAmplification              |
| erm(35)    | BAL_CASE02 |       |       |      | NoAmplification              |
| erm(36)    | BAL_CASE02 | 37.83 | 86.32 | 1.74 |                              |
| ermA       | BAL_CASE02 |       |       |      | NoAmplification              |
| ermA/ermTR | BAL_CASE02 |       |       |      | NoAmplification              |
| ermB       | BAL_CASE02 |       |       |      | NoAmplification              |
| ermC       | BAL_CASE02 |       |       |      | NoAmplification              |
| ermF       | BAL_CASE02 |       |       |      | NoAmplification              |
| ermJ/ermD  | BAL_CASE02 |       |       |      | NoAmplification              |
| ermK-01    | BAL_CASE02 |       |       |      | NoAmplification              |
| ermK-02    | BAL_CASE02 |       |       |      | NoAmplification              |
| ermT-01    | BAL_CASE02 |       |       |      | NoAmplification              |
| ermT-02    | BAL_CASE02 |       |       |      | NoAmplification              |
| ermX       | BAL_CASE02 |       |       |      | NoAmplification              |
| ermY       | BAL_CASE02 |       |       |      | NoAmplification              |
| fabK       | BAL_CASE02 | 27.82 | 79.12 | 2.07 |                              |
| floR       | BAL_CASE02 |       |       |      | NoAmplification              |
| folA       | BAL_CASE02 |       |       |      | NoAmplification              |
| fosB       | BAL_CASE02 |       |       |      | LowEfficiency, CtIsSmall, S: |
| fosX       | BAL_CASE02 |       |       |      | NoAmplification              |
| fox5       | BAL_CASE02 | 32.77 | 86.09 | 1.84 |                              |
| imiR       | BAL_CASE02 |       |       |      | NoAmplification              |
| ImrA-01    | BAL_CASE02 |       |       |      | NoAmplification              |
| intl       | BAL_CASE02 | 33.05 | 84.76 | 1.92 |                              |
| intl1      | BAL_CASE02 | 21.88 | 87.47 | 1.99 |                              |
| IS613      | BAL_CASE02 | 24.34 | 79.6  | 1.75 |                              |
| lnuA-01    | BAL_CASE02 |       |       |      | NoAmplification              |
| lnuB-01    | BAL_CASE02 |       |       |      | NoAmplification              |
| lnuB-02    | BAL_CASE02 |       |       |      | NoAmplification              |

|               |            |       |       |      |                   |
|---------------|------------|-------|-------|------|-------------------|
| lnuC          | BAL_CASE02 |       |       |      | NoAmplification   |
| marR-01       | BAL_CASE02 | 37.88 | 85.7  | 1.82 |                   |
| matA/mel      | BAL_CASE02 | 25.89 | 77.81 | 2.03 |                   |
| mdet1         | BAL_CASE02 |       |       |      | NoAmplification   |
| mdtA          | BAL_CASE02 | 38.82 | 64.06 | 1.79 | MultipleMeltPeaks |
| mdtE/yhiU     | BAL_CASE02 |       |       |      | NoAmplification   |
| mecA          | BAL_CASE02 |       |       |      | NoAmplification   |
| mefA          | BAL_CASE02 | 27.38 | 80.73 | 1.94 |                   |
| mepA          | BAL_CASE02 | 35.5  | 78.66 | 1.9  |                   |
| mexA          | BAL_CASE02 |       |       |      | NoAmplification   |
| mexD          | BAL_CASE02 | 32.87 | 80.18 | 2.01 |                   |
| mexE          | BAL_CASE02 |       |       |      | NoAmplification   |
| mexF          | BAL_CASE02 | 31.5  | 87.15 | 2.03 | MultipleMeltPeaks |
| mphA-01       | BAL_CASE02 | 35.25 | 86.98 | 1.89 |                   |
| mphA-02       | BAL_CASE02 | 33.64 | 86.75 | 1.93 | MultipleMeltPeaks |
| mphB          | BAL_CASE02 |       |       |      | NoAmplification   |
| mphC          | BAL_CASE02 |       |       |      | NoAmplification   |
| msrA-01       | BAL_CASE02 |       |       |      | NoAmplification   |
| msrC-01       | BAL_CASE02 |       |       |      | NoAmplification   |
| mtrC-01       | BAL_CASE02 |       |       |      | NoAmplification   |
| mtrC-02       | BAL_CASE02 | 36.66 | 84.42 | 1.79 |                   |
| mtrD-02       | BAL_CASE02 | 28.99 | 81.24 | 1.92 | MultipleMeltPeaks |
| mtrD-03       | BAL_CASE02 |       |       |      | NoAmplification   |
| NDM1          | BAL_CASE02 |       |       |      | NoAmplification   |
| nimE          | BAL_CASE02 |       |       |      | NoAmplification   |
| nisB          | BAL_CASE02 |       |       |      | NoAmplification   |
| oleC          | BAL_CASE02 |       |       |      | NoAmplification   |
| oprD          | BAL_CASE02 | 33.07 | 81.58 | 1.99 |                   |
| oprJ          | BAL_CASE02 | 33.65 | 88.68 | 1.91 |                   |
| pbp           | BAL_CASE02 |       |       |      | NoAmplification   |
| pbp2x         | BAL_CASE02 |       |       |      | NoAmplification   |
| Pbp5          | BAL_CASE02 |       |       |      | NoAmplification   |
| penA          | BAL_CASE02 |       |       |      | NoAmplification   |
| pikR1         | BAL_CASE02 |       |       |      | NoAmplification   |
| pikR2         | BAL_CASE02 | 32.03 | 84.69 | 2.01 |                   |
| pmrA          | BAL_CASE02 | 28.94 | 79.1  | 2.06 |                   |
| pncA          | BAL_CASE02 | 33.82 | 80.76 | 1.88 | MultipleMeltPeaks |
| putative mulI | BAL_CASE02 |       |       |      | NoAmplification   |
| qac           | BAL_CASE02 |       |       |      | NoAmplification   |
| qacA          | BAL_CASE02 | 41.58 | 70.53 | 1.56 |                   |
| qacA/qacB     | BAL_CASE02 |       |       |      | NoAmplification   |
| qacEdelta1-0  | BAL_CASE02 |       |       |      | NoAmplification   |
| qacEdelta1-0  | BAL_CASE02 | 33.52 | 80.23 | 1.97 |                   |
| qacH-01       | BAL_CASE02 |       |       |      | CurveFitFailed    |
| qacH-02       | BAL_CASE02 | 39.66 | 84.09 | 1.59 |                   |
| qnrA          | BAL_CASE02 | 37.87 | 73.25 | 1.86 | MultipleMeltPeaks |

|              |            |       |       |                 |
|--------------|------------|-------|-------|-----------------|
| rarD-02      | BAL_CASE02 |       |       | NoAmplification |
| sat4         | BAL_CASE02 |       |       | NoAmplification |
| sdeB         | BAL_CASE02 |       |       | NoAmplification |
| spcN-01      | BAL_CASE02 |       |       | NoAmplification |
| speA         | BAL_CASE02 |       |       | NoAmplification |
| str          | BAL_CASE02 |       |       | NoAmplification |
| strA         | BAL_CASE02 |       |       | NoAmplification |
| strB         | BAL_CASE02 |       |       | CurveFitFailed  |
| sul1         | BAL_CASE02 |       |       | NoAmplification |
| sul2         | BAL_CASE02 |       |       | NoAmplification |
| sulA/foIP-01 | BAL_CASE02 | 26.61 | 81.02 | 1.99            |
| sulA/foIP-03 | BAL_CASE02 | 27.35 | 83.67 | 1.94            |
| tet(32)      | BAL_CASE02 |       |       | NoAmplification |
| tet(34)      | BAL_CASE02 | 27.94 | 76.03 | 1.98            |
| tet(35)      | BAL_CASE02 |       |       | NoAmplification |
| tet(36)-A    | BAL_CASE02 |       |       | NoAmplification |
| tet(36)-B    | BAL_CASE02 |       |       | NoAmplification |
| tet(37)      | BAL_CASE02 | 41.5  | 78.36 | 1.71            |
| tetA-01      | BAL_CASE02 | 36.12 | 85.07 | 1.85            |
| tetA-02      | BAL_CASE02 |       |       | NoAmplification |
| tetB-01      | BAL_CASE02 | 26.62 | 79.67 | 1.95            |
| tetB-02      | BAL_CASE02 | 26.15 | 79.58 | 2               |
| tetC-01      | BAL_CASE02 | 26.37 | 75.2  | 1.94            |
| tetC-02      | BAL_CASE02 | 25.69 | 75.95 | 2               |
| tetD-01      | BAL_CASE02 |       |       | NoAmplification |
| tetD-02      | BAL_CASE02 | 31.42 | 77.63 | 1.95            |
| tetE         | BAL_CASE02 |       |       | NoAmplification |
| tetG-01      | BAL_CASE02 |       |       | CurveFitFailed  |
| tetG-02      | BAL_CASE02 |       |       | NoAmplification |
| tetH         | BAL_CASE02 |       |       | NoAmplification |
| tetJ         | BAL_CASE02 |       |       | NoAmplification |
| tetK         | BAL_CASE02 |       |       | NoAmplification |
| tetL-01      | BAL_CASE02 |       |       | NoAmplification |
| tetL-02      | BAL_CASE02 |       |       | NoAmplification |
| tetM-01      | BAL_CASE02 | 24.96 | 76.03 | 2               |
| tetM-02      | BAL_CASE02 | 24.09 | 77.5  | 2.03            |
| tetO-01      | BAL_CASE02 |       |       | NoAmplification |
| tetPA        | BAL_CASE02 |       |       | NoAmplification |
| tetPB-01     | BAL_CASE02 |       |       | NoAmplification |
| tetPB-02     | BAL_CASE02 | 34.71 | 84.74 | 2.03            |
| tetPB-03     | BAL_CASE02 |       |       | NoAmplification |
| tetPB-05     | BAL_CASE02 |       |       | NoAmplification |
| tetQ         | BAL_CASE02 | 23.75 | 77.4  | 2.01            |
| tetR-02      | BAL_CASE02 | 37.24 | 87.14 | 1.79            |
| tetR-03      | BAL_CASE02 | 28.21 | 76.23 | 1.98            |
| tetS         | BAL_CASE02 |       |       | NoAmplification |

|             |            |       |       |      |                   |
|-------------|------------|-------|-------|------|-------------------|
| tetT        | BAL_CASE02 |       |       |      | NoAmplification   |
| tetU-01     | BAL_CASE02 |       |       |      | NoAmplification   |
| tetV        | BAL_CASE02 |       |       |      | NoAmplification   |
| tetW-01     | BAL_CASE02 | 29.63 | 81.26 | 1.92 |                   |
| tetX        | BAL_CASE02 |       |       |      | NoAmplification   |
| tnpA-01     | BAL_CASE02 |       |       |      | NoAmplification   |
| tnpA-02     | BAL_CASE02 |       |       |      | NoAmplification   |
| tnpA-03     | BAL_CASE02 | 35.66 | 74.31 | 2.08 |                   |
| tnpA-04     | BAL_CASE02 |       |       |      | NoAmplification   |
| tnpA-05     | BAL_CASE02 |       |       |      | NoAmplification   |
| tnpA-07     | BAL_CASE02 |       |       |      | NoAmplification   |
| tolC-01     | BAL_CASE02 |       |       |      | NoAmplification   |
| tolC-02     | BAL_CASE02 | 33.24 | 83.72 | 1.99 | MultipleMeltPeaks |
| tolC-03     | BAL_CASE02 | 34.19 | 84.85 | 1.91 |                   |
| Tp614       | BAL_CASE02 | 35.68 | 73.63 | 1.89 |                   |
| ttgA        | BAL_CASE02 |       |       |      | NoAmplification   |
| ttgB        | BAL_CASE02 | 35.82 | 79.47 | 1.82 |                   |
| vanA        | BAL_CASE02 |       |       |      | NoAmplification   |
| vanB-01     | BAL_CASE02 | 27.92 | 74.16 | 1.92 |                   |
| vanC-01     | BAL_CASE02 |       |       |      | NoAmplification   |
| vanC-02     | BAL_CASE02 |       |       |      | NoAmplification   |
| vanC-03     | BAL_CASE02 | 32.77 | 77.63 | 1.87 |                   |
| vanC1       | BAL_CASE02 |       |       |      | NoAmplification   |
| vanC2/vanC3 | BAL_CASE02 | 36.55 | 82.7  | 1.85 |                   |
| vanG        | BAL_CASE02 |       |       |      | NoAmplification   |
| vanHB       | BAL_CASE02 |       |       |      | NoAmplification   |
| vanHD       | BAL_CASE02 |       |       |      | NoAmplification   |
| vanRA-01    | BAL_CASE02 |       |       |      | NoAmplification   |
| vanRA-02    | BAL_CASE02 |       |       |      | NoAmplification   |
| vanRB       | BAL_CASE02 | 37.87 | 88.87 | 1.75 |                   |
| vanRC       | BAL_CASE02 |       |       |      | NoAmplification   |
| vanRC4      | BAL_CASE02 |       |       |      | NoAmplification   |
| vanRD       | BAL_CASE02 |       |       |      | NoAmplification   |
| vanSA       | BAL_CASE02 |       |       |      | NoAmplification   |
| vanSB       | BAL_CASE02 |       |       |      | NoAmplification   |
| vanSC-01    | BAL_CASE02 |       |       |      | NoAmplification   |
| vanSC-02    | BAL_CASE02 |       |       |      | NoAmplification   |
| vanTC-01    | BAL_CASE02 |       |       |      | NoAmplification   |
| vanTC-02    | BAL_CASE02 |       |       |      | NoAmplification   |
| vanTE       | BAL_CASE02 |       |       |      | NoAmplification   |
| vanTG       | BAL_CASE02 |       |       |      | NoAmplification   |
| vanWB       | BAL_CASE02 |       |       |      | NoAmplification   |
| vanWG       | BAL_CASE02 | 32.63 | 74.71 | 1.97 |                   |
| vanXA       | BAL_CASE02 |       |       |      | NoAmplification   |
| vanXB       | BAL_CASE02 |       |       |      | NoAmplification   |
| vanXD       | BAL_CASE02 | 32.67 | 74.39 | 1.87 |                   |

|              |            |       |       |                 |
|--------------|------------|-------|-------|-----------------|
| vanYB        | BAL_CASE02 |       |       | NoAmplification |
| vanYD-01     | BAL_CASE02 |       |       | CurveFitFailed  |
| vanYD-02     | BAL_CASE02 |       |       | NoAmplification |
| vatB-01      | BAL_CASE02 |       |       | NoAmplification |
| vatB-02      | BAL_CASE02 |       |       | NoAmplification |
| vatC-01      | BAL_CASE02 |       |       | NoAmplification |
| vatC-02      | BAL_CASE02 | 36.19 | 87.01 | 1.81            |
| vatE-01      | BAL_CASE02 | 29.57 | 76.51 | 2.11            |
| vatE-02      | BAL_CASE02 |       |       | NoAmplification |
| vgaA-01      | BAL_CASE02 |       |       | NoAmplification |
| vgaA-02      | BAL_CASE02 | 39.93 | 76.38 | 1.8             |
| vgb-01       | BAL_CASE02 |       |       | NoAmplification |
| vgbB-01      | BAL_CASE02 |       |       | NoAmplification |
| vgbB-02      | BAL_CASE02 |       |       | NoAmplification |
| yceE/mdtG-0  | BAL_CASE02 |       |       | NoAmplification |
| yceE/mdtG-0  | BAL_CASE02 |       |       | NoAmplification |
| yceL/mdtH-0  | BAL_CASE02 |       |       | NoAmplification |
| yceL/mdtH-0  | BAL_CASE02 |       |       | NoAmplification |
| yceL/mdtH-0  | BAL_CASE02 | 35.59 | 89.04 | 1.88            |
| yidY/mdtL-01 | BAL_CASE02 | 29.2  | 82.34 | 1.97            |
| yidY/mdtL-02 | BAL_CASE02 |       |       | CurveFitFailed  |

| Assay          | Sample     | Ct    | Tm    | Efficiency | Flags                  |
|----------------|------------|-------|-------|------------|------------------------|
| 16S rRNA       | BAL_CASE03 |       | 17.22 | 82.46      | 1.91                   |
| aac            | BAL_CASE03 |       | 31.71 | 86.48      | 1.57 MultipleMeltPeaks |
| aac(6')-Ib(akz | BAL_CASE03 |       |       |            | NoAmplification        |
| aac(6')-Ib(akz | BAL_CASE03 | 33.87 | 79.09 | 1.96       | MultipleMeltPeaks      |
| aac(6')-Ib(akz | BAL_CASE03 |       |       |            | NoAmplification        |
| aac(6')-II     | BAL_CASE03 |       |       |            | NoAmplification        |
| aac(6')I1      | BAL_CASE03 |       |       |            | NoAmplification        |
| aacA/aphD      | BAL_CASE03 |       |       |            | NoAmplification        |
| aacC           | BAL_CASE03 | 29.99 | 88.6  | 1.9        |                        |
| aacC1          | BAL_CASE03 |       |       |            | NoAmplification        |
| aacC2          | BAL_CASE03 |       |       |            | NoAmplification        |
| aacC4          | BAL_CASE03 |       |       |            | NoAmplification        |
| aadA-01        | BAL_CASE03 |       |       |            | NoAmplification        |
| aadA-02        | BAL_CASE03 | 40.34 | 80.83 | 1.74       |                        |
| aadA-1-01      | BAL_CASE03 | 33.96 | 81.53 | 1.95       |                        |
| aadA-1-02      | BAL_CASE03 |       |       |            | NoAmplification        |
| aadA1          | BAL_CASE03 | 35.88 | 77.1  | 1.94       |                        |
| aadA2-01       | BAL_CASE03 |       |       |            | NoAmplification        |
| aadA2-02       | BAL_CASE03 | 32.64 | 75.41 | 1.95       |                        |
| aadA2-03       | BAL_CASE03 |       |       |            | NoAmplification        |
| aadA5-01       | BAL_CASE03 |       |       |            | CurveFitFailed         |
| aadA5-02       | BAL_CASE03 | 33.15 | 77.96 | 1.98       | MultipleMeltPeaks      |
| aadA9-01       | BAL_CASE03 |       |       |            | NoAmplification        |
| aadA9-02       | BAL_CASE03 |       |       |            | NoAmplification        |
| aadD           | BAL_CASE03 |       |       |            | NoAmplification        |
| aadE           | BAL_CASE03 |       |       |            | NoAmplification        |
| acrA-01        | BAL_CASE03 | 31.05 | 88.76 | 1.89       |                        |
| acrA-02        | BAL_CASE03 |       |       |            | NoAmplification        |
| acrA-03        | BAL_CASE03 | 36.19 | 81.99 | 1.89       | MultipleMeltPeaks      |
| acrA-04        | BAL_CASE03 | 30.84 | 80.64 | 1.96       | MultipleMeltPeaks      |
| acrA-05        | BAL_CASE03 | 31.91 | 88.02 | 1.96       |                        |
| acrB-01        | BAL_CASE03 | 34.61 | 77.02 | 2.02       |                        |
| acrF           | BAL_CASE03 | 34.15 | 82.06 | 1.95       | MultipleMeltPeaks      |
| acrR-01        | BAL_CASE03 | 31.65 | 87.23 | 1.94       | MultipleMeltPeaks      |
| acrR-02        | BAL_CASE03 |       |       |            | NoAmplification        |
| Actin          | BAL_CASE03 | 21.91 | 87.19 | 1.91       |                        |
| adeA           | BAL_CASE03 |       |       |            | NoAmplification        |
| ampC-01        | BAL_CASE03 | 35.54 | 84.53 | 1.84       | MultipleMeltPeaks      |
| ampC-02        | BAL_CASE03 | 36.05 | 77.45 | 2.03       |                        |
| ampC-04        | BAL_CASE03 | 36.32 | 77.41 | 2          |                        |
| ampC-05        | BAL_CASE03 |       |       |            | NoAmplification        |
| ampC-06        | BAL_CASE03 |       |       |            | NoAmplification        |
| ampC-07        | BAL_CASE03 | 36.42 | 82.72 | 1.77       | MultipleMeltPeaks      |
| ampC-09        | BAL_CASE03 |       |       |            | NoAmplification        |
| ampC/blaDH     | BAL_CASE03 | 33.13 | 76.15 | 1.92       |                        |



|                          |            |       |       |      |                   |
|--------------------------|------------|-------|-------|------|-------------------|
| aph                      | BAL_CASE03 |       |       |      | NoAmplification   |
| aph(2')-Id-01            | BAL_CASE03 |       |       |      | NoAmplification   |
| aph(2')-Id-02            | BAL_CASE03 |       |       |      | NoAmplification   |
| aph6ia                   | BAL_CASE03 |       |       |      | NoAmplification   |
| aphA1(aka k <sub>z</sub> | BAL_CASE03 |       |       |      | NoAmplification   |
| bacA-01                  | BAL_CASE03 |       |       |      | NoAmplification   |
| bacA-02                  | BAL_CASE03 |       |       |      | NoAmplification   |
| BETA-globin              | BAL_CASE03 | 22.65 | 84.29 | 1.94 |                   |
| bla-ACC-1                | BAL_CASE03 | 35.07 | 86.17 | 1.85 | MultipleMeltPeaks |
| bla-L1                   | BAL_CASE03 | 31.82 | 83.15 | 1.91 |                   |
| bla1                     | BAL_CASE03 |       |       |      | NoAmplification   |
| blaCMY                   | BAL_CASE03 |       |       |      | NoAmplification   |
| blaCMY2-01               | BAL_CASE03 |       |       |      | CurveFitFailed    |
| blaCMY2-02               | BAL_CASE03 | 30.94 | 89.56 | 1.97 |                   |
| blaCTX-M-01              | BAL_CASE03 | 35.21 | 83.16 | 1.84 |                   |
| blaCTX-M-02              | BAL_CASE03 | 41.64 | 79.26 | 1.61 | MultipleMeltPeaks |
| blaCTX-M-03              | BAL_CASE03 |       |       |      | NoAmplification   |
| blaCTX-M-04              | BAL_CASE03 | 36.18 | 80.23 | 1.84 |                   |
| blaCTX-M-05              | BAL_CASE03 | 33    | 76.76 | 1.79 |                   |
| blaCTX-M-06              | BAL_CASE03 |       |       |      | NoAmplification   |
| blaGES                   | BAL_CASE03 |       |       |      | NoAmplification   |
| blaIMP-01                | BAL_CASE03 |       |       |      | NoAmplification   |
| blaIMP-02                | BAL_CASE03 |       |       |      | NoAmplification   |
| blaMOX/blaC              | BAL_CASE03 |       |       |      | NoAmplification   |
| blaOCH                   | BAL_CASE03 |       |       |      | NoAmplification   |
| blaOKP                   | BAL_CASE03 |       |       |      | NoAmplification   |
| blaOXA1/blaC             | BAL_CASE03 |       |       |      | NoAmplification   |
| blaOXA10-01              | BAL_CASE03 |       |       |      | NoAmplification   |
| blaOXA10-02              | BAL_CASE03 |       |       |      | NoAmplification   |
| blaOXY                   | BAL_CASE03 |       |       |      | NoAmplification   |
| blaPAO                   | BAL_CASE03 |       |       |      | NoAmplification   |
| blaPER                   | BAL_CASE03 | 37.82 | 85.39 | 1.81 | MultipleMeltPeaks |
| blaPSE                   | BAL_CASE03 |       |       |      | NoAmplification   |
| blaROB                   | BAL_CASE03 |       |       |      | NoAmplification   |
| blaSFO                   | BAL_CASE03 | 35.81 | 87.25 | 1.9  |                   |
| blaSHV-01                | BAL_CASE03 |       |       |      | NoAmplification   |
| blaSHV-02                | BAL_CASE03 |       |       |      | NoAmplification   |
| blaTEM                   | BAL_CASE03 | 35.59 | 74.87 | 2.01 |                   |
| blaTLA                   | BAL_CASE03 |       |       |      | NoAmplification   |
| blaVEB                   | BAL_CASE03 |       |       |      | NoAmplification   |
| blaVIM                   | BAL_CASE03 |       |       |      | NoAmplification   |
| blaZ                     | BAL_CASE03 |       |       |      | NoAmplification   |
| carB                     | BAL_CASE03 |       |       |      | NoAmplification   |
| catA1                    | BAL_CASE03 |       |       |      | NoAmplification   |
| catB3                    | BAL_CASE03 |       |       |      | NoAmplification   |
| catB8                    | BAL_CASE03 | 28.45 | 81.52 | 1.98 | MultipleMeltPeaks |

|            |            |       |       |      |                              |
|------------|------------|-------|-------|------|------------------------------|
| ceoA       | BAL_CASE03 | 29.12 | 82.52 | 1.95 |                              |
| cepA       | BAL_CASE03 |       |       |      | NoAmplification              |
| cfiA       | BAL_CASE03 |       |       |      | NoAmplification              |
| cfr        | BAL_CASE03 |       |       |      | NoAmplification              |
| cfxA       | BAL_CASE03 | 19.4  | 77.62 | 1.89 |                              |
| cmeA       | BAL_CASE03 |       |       |      | NoAmplification              |
| cmlA1-01   | BAL_CASE03 |       |       |      | NoAmplification              |
| cmlA1-02   | BAL_CASE03 |       |       |      | NoAmplification              |
| cmr        | BAL_CASE03 |       |       |      | NoAmplification              |
| cmx(A)     | BAL_CASE03 | 29.21 | 84.89 | 1.95 | MultipleMeltPeaks            |
| cphA-01    | BAL_CASE03 | 33.07 | 85.64 | 1.95 |                              |
| cphA-02    | BAL_CASE03 | 31.02 | 78.65 | 1.96 | MultipleMeltPeaks            |
| dfrA1      | BAL_CASE03 |       |       |      | NoAmplification              |
| dfrA12     | BAL_CASE03 |       |       |      | NoAmplification              |
| emrD       | BAL_CASE03 |       |       |      | NoAmplification              |
| ereA       | BAL_CASE03 | 38.32 | 82.71 | 1.76 |                              |
| ereB       | BAL_CASE03 | 34.78 | 85.93 | 1.93 | MultipleMeltPeaks            |
| erm(34)    | BAL_CASE03 |       |       |      | NoAmplification              |
| erm(35)    | BAL_CASE03 |       |       |      | NoAmplification              |
| erm(36)    | BAL_CASE03 | 36.35 | 82.22 | 1.84 |                              |
| ermA       | BAL_CASE03 |       |       |      | NoAmplification              |
| ermA/ermTR | BAL_CASE03 |       |       |      | NoAmplification              |
| ermB       | BAL_CASE03 | 25.23 | 75.11 | 2.06 |                              |
| ermC       | BAL_CASE03 |       |       |      | CurveFitFailed               |
| ermF       | BAL_CASE03 | 19.36 | 74.9  | 2.01 |                              |
| ermJ/ermD  | BAL_CASE03 |       |       |      | NoAmplification              |
| ermK-01    | BAL_CASE03 | 35.36 | 74.28 | 1.97 |                              |
| ermK-02    | BAL_CASE03 | 39.34 | 80.81 | 1.67 |                              |
| ermT-01    | BAL_CASE03 |       |       |      | NoAmplification              |
| ermT-02    | BAL_CASE03 |       |       |      | NoAmplification              |
| ermX       | BAL_CASE03 | 24.5  | 83.85 | 1.88 |                              |
| ermY       | BAL_CASE03 |       |       |      | NoAmplification              |
| fabK       | BAL_CASE03 | 27.09 | 79.12 | 2.03 |                              |
| floR       | BAL_CASE03 | 38.03 | 83.77 | 1.82 | MultipleMeltPeaks            |
| folA       | BAL_CASE03 |       |       |      | NoAmplification              |
| fosB       | BAL_CASE03 |       |       |      | LowEfficiency, CtIsSmall, S: |
| fosX       | BAL_CASE03 |       |       |      | NoAmplification              |
| fox5       | BAL_CASE03 | 28.39 | 87.61 | 1.92 |                              |
| imiR       | BAL_CASE03 |       |       |      | NoAmplification              |
| ImrA-01    | BAL_CASE03 |       |       |      | NoAmplification              |
| intl       | BAL_CASE03 | 32.04 | 84.84 | 1.92 |                              |
| intl1      | BAL_CASE03 | 21.92 | 87.43 | 1.97 |                              |
| IS613      | BAL_CASE03 | 18.34 | 80.12 | 1.73 |                              |
| lnuA-01    | BAL_CASE03 |       |       |      | NoAmplification              |
| lnuB-01    | BAL_CASE03 |       |       |      | NoAmplification              |
| lnuB-02    | BAL_CASE03 |       |       |      | NoAmplification              |

|                |            |       |       |      |                   |
|----------------|------------|-------|-------|------|-------------------|
| lnuC           | BAL_CASE03 |       |       |      | NoAmplification   |
| marR-01        | BAL_CASE03 | 36.13 | 85.54 | 1.86 |                   |
| matA/mel       | BAL_CASE03 | 23.07 | 77.84 | 2.04 |                   |
| mdet1          | BAL_CASE03 |       |       |      | NoAmplification   |
| mdtA           | BAL_CASE03 |       |       |      | NoAmplification   |
| mdtE/yhiU      | BAL_CASE03 |       |       |      | NoAmplification   |
| mecA           | BAL_CASE03 |       |       |      | NoAmplification   |
| mefA           | BAL_CASE03 | 22.44 | 80.77 | 1.97 |                   |
| mepA           | BAL_CASE03 | 34.49 | 81.68 | 1.95 | MultipleMeltPeaks |
| mexA           | BAL_CASE03 |       |       |      | NoAmplification   |
| mexD           | BAL_CASE03 | 38.72 | 79.82 | 1.77 |                   |
| mexE           | BAL_CASE03 |       |       |      | CurveFitFailed    |
| mexF           | BAL_CASE03 | 27.51 | 87.71 | 1.9  |                   |
| mphA-01        | BAL_CASE03 | 31.87 | 89.1  | 1.94 |                   |
| mphA-02        | BAL_CASE03 | 32.4  | 86.86 | 1.58 |                   |
| mphB           | BAL_CASE03 |       |       |      | NoAmplification   |
| mphC           | BAL_CASE03 |       |       |      | NoAmplification   |
| msrA-01        | BAL_CASE03 |       |       |      | NoAmplification   |
| msrC-01        | BAL_CASE03 |       |       |      | NoAmplification   |
| mtrC-01        | BAL_CASE03 |       |       |      | NoAmplification   |
| mtrC-02        | BAL_CASE03 | 39.22 | 84.17 | 1.73 | MultipleMeltPeaks |
| mtrD-02        | BAL_CASE03 | 28.36 | 81.06 | 1.94 | MultipleMeltPeaks |
| mtrD-03        | BAL_CASE03 |       |       |      | NoAmplification   |
| NDM1           | BAL_CASE03 |       |       |      | CurveFitFailed    |
| nimE           | BAL_CASE03 | 34.44 | 75.77 | 2.01 |                   |
| nisB           | BAL_CASE03 |       |       |      | NoAmplification   |
| oleC           | BAL_CASE03 | 39.31 | 81.29 | 1.75 |                   |
| oprD           | BAL_CASE03 | 32.17 | 81.74 | 1.98 | MultipleMeltPeaks |
| oprJ           | BAL_CASE03 | 32.64 | 88.39 | 1.9  |                   |
| pbp            | BAL_CASE03 |       |       |      | NoAmplification   |
| pbp2x          | BAL_CASE03 |       |       |      | NoAmplification   |
| Pbp5           | BAL_CASE03 |       |       |      | NoAmplification   |
| penA           | BAL_CASE03 |       |       |      | NoAmplification   |
| pikR1          | BAL_CASE03 |       |       |      | NoAmplification   |
| pikR2          | BAL_CASE03 | 30.92 | 85.7  | 2.02 |                   |
| pmrA           | BAL_CASE03 | 23.11 | 79.72 | 2.08 |                   |
| pncA           | BAL_CASE03 | 37.77 | 74.89 | 1.94 | MultipleMeltPeaks |
| putative multi | BAL_CASE03 | 35.65 | 76.98 | 1.89 | MultipleMeltPeaks |
| qac            | BAL_CASE03 |       |       |      | NoAmplification   |
| qacA           | BAL_CASE03 |       |       |      | NoAmplification   |
| qacA/qacB      | BAL_CASE03 |       |       |      | CurveFitFailed    |
| qacEdelta1-0   | BAL_CASE03 |       |       |      | NoAmplification   |
| qacEdelta1-0   | BAL_CASE03 |       |       |      | NoAmplification   |
| qacH-01        | BAL_CASE03 | 34.98 | 86.65 | 1.9  |                   |
| qacH-02        | BAL_CASE03 | 37.61 | 83.71 | 1.68 |                   |
| qnrA           | BAL_CASE03 | 36.51 | 84.22 | 1.82 | MultipleMeltPeaks |

|              |            |       |       |                 |
|--------------|------------|-------|-------|-----------------|
| rarD-02      | BAL_CASE03 |       |       | NoAmplification |
| sat4         | BAL_CASE03 |       |       | NoAmplification |
| sdeB         | BAL_CASE03 |       |       | NoAmplification |
| spcN-01      | BAL_CASE03 |       |       | NoAmplification |
| speA         | BAL_CASE03 |       |       | NoAmplification |
| str          | BAL_CASE03 |       |       | NoAmplification |
| strA         | BAL_CASE03 |       |       | NoAmplification |
| strB         | BAL_CASE03 |       |       | NoAmplification |
| sul1         | BAL_CASE03 |       |       | NoAmplification |
| sul2         | BAL_CASE03 |       |       | NoAmplification |
| sulA/foIP-01 | BAL_CASE03 | 21.38 | 81.25 | 1.97            |
| sulA/foIP-03 | BAL_CASE03 | 22.39 | 83.46 | 1.97            |
| tet(32)      | BAL_CASE03 | 24.41 | 81.41 | 1.97            |
| tet(34)      | BAL_CASE03 | 31.65 | 75.58 | 1.96            |
| tet(35)      | BAL_CASE03 |       |       | NoAmplification |
| tet(36)-A    | BAL_CASE03 |       |       | NoAmplification |
| tet(36)-B    | BAL_CASE03 |       |       | NoAmplification |
| tet(37)      | BAL_CASE03 | 24.07 | 76.5  | 1.96            |
| tetA-01      | BAL_CASE03 |       |       | CurveFitFailed  |
| tetA-02      | BAL_CASE03 |       |       | NoAmplification |
| tetB-01      | BAL_CASE03 |       |       | NoAmplification |
| tetB-02      | BAL_CASE03 |       |       | NoAmplification |
| tetC-01      | BAL_CASE03 |       |       | NoAmplification |
| tetC-02      | BAL_CASE03 |       |       | NoAmplification |
| tetD-01      | BAL_CASE03 |       |       | NoAmplification |
| tetD-02      | BAL_CASE03 |       |       | NoAmplification |
| tetE         | BAL_CASE03 |       |       | NoAmplification |
| tetG-01      | BAL_CASE03 |       |       | NoAmplification |
| tetG-02      | BAL_CASE03 |       |       | NoAmplification |
| tetH         | BAL_CASE03 |       |       | NoAmplification |
| tetJ         | BAL_CASE03 |       |       | NoAmplification |
| tetK         | BAL_CASE03 |       |       | NoAmplification |
| tetL-01      | BAL_CASE03 |       |       | NoAmplification |
| tetL-02      | BAL_CASE03 |       |       | NoAmplification |
| tetM-01      | BAL_CASE03 | 23.16 | 75.89 | 1.98            |
| tetM-02      | BAL_CASE03 | 23.29 | 77.42 | 1.99            |
| tetO-01      | BAL_CASE03 | 27.57 | 76.66 | 1.97            |
| tetPA        | BAL_CASE03 |       |       | NoAmplification |
| tetPB-01     | BAL_CASE03 |       |       | NoAmplification |
| tetPB-02     | BAL_CASE03 | 31.53 | 84.71 | 1.99            |
| tetPB-03     | BAL_CASE03 |       |       | NoAmplification |
| tetPB-05     | BAL_CASE03 |       |       | NoAmplification |
| tetQ         | BAL_CASE03 | 19.78 | 77.03 | 2.04            |
| tetR-02      | BAL_CASE03 |       |       | CurveFitFailed  |
| tetR-03      | BAL_CASE03 | 28.1  | 76.02 | 1.98            |
| tetS         | BAL_CASE03 |       |       | NoAmplification |

|             |            |       |       |      |                   |
|-------------|------------|-------|-------|------|-------------------|
| tetT        | BAL_CASE03 | 43.99 | 76.67 | 1.69 |                   |
| tetU-01     | BAL_CASE03 |       |       |      | NoAmplification   |
| tetV        | BAL_CASE03 |       |       |      | NoAmplification   |
| tetW-01     | BAL_CASE03 | 24.33 | 81.25 | 1.98 |                   |
| tetX        | BAL_CASE03 |       |       |      | NoAmplification   |
| tnpA-01     | BAL_CASE03 |       |       |      | NoAmplification   |
| tnpA-02     | BAL_CASE03 |       |       |      | NoAmplification   |
| tnpA-03     | BAL_CASE03 | 32.79 | 75.39 | 2.13 |                   |
| tnpA-04     | BAL_CASE03 |       |       |      | NoAmplification   |
| tnpA-05     | BAL_CASE03 | 36.03 | 83.1  | 1.87 |                   |
| tnpA-07     | BAL_CASE03 |       |       |      | NoAmplification   |
| tolC-01     | BAL_CASE03 |       |       |      | NoAmplification   |
| tolC-02     | BAL_CASE03 | 33.27 | 87.82 | 1.96 | MultipleMeltPeaks |
| tolC-03     | BAL_CASE03 | 33.11 | 85.82 | 1.95 |                   |
| Tp614       | BAL_CASE03 |       |       |      | CurveFitFailed    |
| ttgA        | BAL_CASE03 | 38.06 | 87.46 | 1.79 |                   |
| ttgB        | BAL_CASE03 |       |       |      | NoAmplification   |
| vanA        | BAL_CASE03 |       |       |      | NoAmplification   |
| vanB-01     | BAL_CASE03 | 28.3  | 73.9  | 1.77 |                   |
| vanC-01     | BAL_CASE03 |       |       |      | NoAmplification   |
| vanC-02     | BAL_CASE03 |       |       |      | NoAmplification   |
| vanC-03     | BAL_CASE03 | 33.66 | 86.23 | 1.93 | MultipleMeltPeaks |
| vanC1       | BAL_CASE03 |       |       |      | NoAmplification   |
| vanC2/vanC3 | BAL_CASE03 |       |       |      | NoAmplification   |
| vanG        | BAL_CASE03 |       |       |      | NoAmplification   |
| vanHB       | BAL_CASE03 | 37.2  | 86.01 | 1.81 |                   |
| vanHD       | BAL_CASE03 |       |       |      | NoAmplification   |
| vanRA-01    | BAL_CASE03 |       |       |      | NoAmplification   |
| vanRA-02    | BAL_CASE03 |       |       |      | NoAmplification   |
| vanRB       | BAL_CASE03 |       |       |      | NoAmplification   |
| vanRC       | BAL_CASE03 |       |       |      | NoAmplification   |
| vanRC4      | BAL_CASE03 |       |       |      | NoAmplification   |
| vanRD       | BAL_CASE03 |       |       |      | NoAmplification   |
| vanSA       | BAL_CASE03 |       |       |      | NoAmplification   |
| vanSB       | BAL_CASE03 |       |       |      | NoAmplification   |
| vanSC-01    | BAL_CASE03 |       |       |      | NoAmplification   |
| vanSC-02    | BAL_CASE03 |       |       |      | NoAmplification   |
| vanTC-01    | BAL_CASE03 |       |       |      | NoAmplification   |
| vanTC-02    | BAL_CASE03 |       |       |      | NoAmplification   |
| vanTE       | BAL_CASE03 |       |       |      | NoAmplification   |
| vanTG       | BAL_CASE03 |       |       |      | NoAmplification   |
| vanWB       | BAL_CASE03 |       |       |      | NoAmplification   |
| vanWG       | BAL_CASE03 |       |       |      | NoAmplification   |
| vanXA       | BAL_CASE03 |       |       |      | NoAmplification   |
| vanXB       | BAL_CASE03 |       |       |      | NoAmplification   |
| vanXD       | BAL_CASE03 | 32.22 | 74.62 | 1.86 |                   |

|              |            |       |       |      |                   |
|--------------|------------|-------|-------|------|-------------------|
| vanYB        | BAL_CASE03 |       |       |      | NoAmplification   |
| vanYD-01     | BAL_CASE03 | 38.18 | 80.65 | 1.8  |                   |
| vanYD-02     | BAL_CASE03 |       |       |      | CurveFitFailed    |
| vatB-01      | BAL_CASE03 |       |       |      | NoAmplification   |
| vatB-02      | BAL_CASE03 |       |       |      | NoAmplification   |
| vatC-01      | BAL_CASE03 | 37.92 | 75.86 | 1.84 |                   |
| vatC-02      | BAL_CASE03 | 38.04 | 86.32 | 1.73 |                   |
| vatE-01      | BAL_CASE03 | 29.01 | 76.91 | 2.11 |                   |
| vatE-02      | BAL_CASE03 |       |       |      | NoAmplification   |
| vgaA-01      | BAL_CASE03 |       |       |      | NoAmplification   |
| vgaA-02      | BAL_CASE03 |       |       |      | NoAmplification   |
| vgb-01       | BAL_CASE03 |       |       |      | NoAmplification   |
| vgbB-01      | BAL_CASE03 |       |       |      | NoAmplification   |
| vgbB-02      | BAL_CASE03 |       |       |      | NoAmplification   |
| yceE/mdtG-0  | BAL_CASE03 |       |       |      | NoAmplification   |
| yceE/mdtG-0  | BAL_CASE03 |       |       |      | NoAmplification   |
| yceL/mdtH-0  | BAL_CASE03 | 37.07 | 88.61 | 1.8  | MultipleMeltPeaks |
| yceL/mdtH-0  | BAL_CASE03 |       |       |      | NoAmplification   |
| yceL/mdtH-0  | BAL_CASE03 |       |       |      | NoAmplification   |
| yidY/mdtL-01 | BAL_CASE03 | 31.2  | 82.38 | 1.99 | MultipleMeltPeaks |
| yidY/mdtL-02 | BAL_CASE03 |       |       |      | NoAmplification   |

| Assay          | Sample     | Ct    | Tm    | Efficiency | Flags             |
|----------------|------------|-------|-------|------------|-------------------|
| 16S rRNA       | BAL_CASE04 |       | 20.53 | 82.12      | 1.83              |
| aac            | BAL_CASE04 |       |       |            | NoAmplification   |
| aac(6')-Ib(akz | BAL_CASE04 |       |       |            | NoAmplification   |
| aac(6')-Ib(akz | BAL_CASE04 |       |       |            | CurveFitFailed    |
| aac(6')-Ib(akz | BAL_CASE04 |       |       |            | CurveFitFailed    |
| aac(6')-II     | BAL_CASE04 |       |       |            | NoAmplification   |
| aac(6')I1      | BAL_CASE04 |       |       |            | NoAmplification   |
| aacA/aphD      | BAL_CASE04 |       |       |            | NoAmplification   |
| aacC           | BAL_CASE04 |       |       |            | NoAmplification   |
| aacC1          | BAL_CASE04 |       |       |            | NoAmplification   |
| aacC2          | BAL_CASE04 |       |       |            | NoAmplification   |
| aacC4          | BAL_CASE04 | 32.68 | 86.72 | 1.89       |                   |
| aadA-01        | BAL_CASE04 | 34.46 | 87.48 | 1.86       |                   |
| aadA-02        | BAL_CASE04 | 32.85 | 80.44 | 1.94       |                   |
| aadA-1-01      | BAL_CASE04 |       |       |            | NoAmplification   |
| aadA-1-02      | BAL_CASE04 |       |       |            | NoAmplification   |
| aadA1          | BAL_CASE04 | 33.12 | 83.19 | 2.06       |                   |
| aadA2-01       | BAL_CASE04 |       |       |            | NoAmplification   |
| aadA2-02       | BAL_CASE04 |       |       |            | NoAmplification   |
| aadA2-03       | BAL_CASE04 |       |       |            | NoAmplification   |
| aadA5-01       | BAL_CASE04 | 32.69 | 88.61 | 1.79       |                   |
| aadA5-02       | BAL_CASE04 | 31.24 | 86.5  | 1.86       | MultipleMeltPeaks |
| aadA9-01       | BAL_CASE04 |       |       |            | CurveFitFailed    |
| aadA9-02       | BAL_CASE04 |       |       |            | NoAmplification   |
| aadD           | BAL_CASE04 |       |       |            | NoAmplification   |
| aadE           | BAL_CASE04 |       |       |            | NoAmplification   |
| acrA-01        | BAL_CASE04 | 30.75 | 88.74 | 1.93       |                   |
| acrA-02        | BAL_CASE04 |       |       |            | NoAmplification   |
| acrA-03        | BAL_CASE04 |       |       |            | NoAmplification   |
| acrA-04        | BAL_CASE04 | 29.08 | 80.65 | 1.91       |                   |
| acrA-05        | BAL_CASE04 | 31.07 | 88.73 | 1.89       |                   |
| acrB-01        | BAL_CASE04 |       |       |            | NoAmplification   |
| acrF           | BAL_CASE04 | 31.25 | 81.78 | 1.85       | MultipleMeltPeaks |
| acrR-01        | BAL_CASE04 | 31.92 | 78.03 | 1.83       | MultipleMeltPeaks |
| acrR-02        | BAL_CASE04 |       |       |            | NoAmplification   |
| Actin          | BAL_CASE04 | 19.2  | 87.25 | 1.82       |                   |
| adeA           | BAL_CASE04 |       |       |            | NoAmplification   |
| ampC-01        | BAL_CASE04 | 33.95 | 79.56 | 1.97       | MultipleMeltPeaks |
| ampC-02        | BAL_CASE04 |       |       |            | NoAmplification   |
| ampC-04        | BAL_CASE04 | 32.72 | 78.52 | 1.77       |                   |
| ampC-05        | BAL_CASE04 |       |       |            | NoAmplification   |
| ampC-06        | BAL_CASE04 | 34.79 | 84.22 | 1.93       |                   |
| ampC-07        | BAL_CASE04 | 32.49 | 88.37 | 1.88       |                   |
| ampC-09        | BAL_CASE04 |       |       |            | NoAmplification   |
| ampC/blaDH     | BAL_CASE04 |       |       |            | CurveFitFailed    |

|                          |            |       |       |      |                   |
|--------------------------|------------|-------|-------|------|-------------------|
| aph                      | BAL_CASE04 |       |       |      | NoAmplification   |
| aph(2')-Id-01            | BAL_CASE04 |       |       |      | NoAmplification   |
| aph(2')-Id-02            | BAL_CASE04 |       |       |      | NoAmplification   |
| aph6ia                   | BAL_CASE04 |       |       |      | CurveFitFailed    |
| aphA1(aka k <sub>z</sub> | BAL_CASE04 |       |       |      | NoAmplification   |
| bacA-01                  | BAL_CASE04 |       |       |      | NoAmplification   |
| bacA-02                  | BAL_CASE04 |       |       |      | NoAmplification   |
| BETA-globin              | BAL_CASE04 | 20.08 | 84.31 | 1.8  |                   |
| bla-ACC-1                | BAL_CASE04 | 34.83 | 85.56 | 1.88 |                   |
| bla-L1                   | BAL_CASE04 |       |       |      | NoAmplification   |
| bla1                     | BAL_CASE04 |       |       |      | NoAmplification   |
| blaCMY                   | BAL_CASE04 |       |       |      | NoAmplification   |
| blaCMY2-01               | BAL_CASE04 |       |       |      | NoAmplification   |
| blaCMY2-02               | BAL_CASE04 | 28.72 | 88.26 | 1.83 | MultipleMeltPeaks |
| blaCTX-M-01              | BAL_CASE04 |       |       |      | CurveFitFailed    |
| blaCTX-M-02              | BAL_CASE04 |       |       |      | NoAmplification   |
| blaCTX-M-03              | BAL_CASE04 |       |       |      | NoAmplification   |
| blaCTX-M-04              | BAL_CASE04 |       |       |      | NoAmplification   |
| blaCTX-M-05              | BAL_CASE04 | 32.25 | 76.2  | 1.8  |                   |
| blaCTX-M-06              | BAL_CASE04 |       |       |      | NoAmplification   |
| blaGES                   | BAL_CASE04 |       |       |      | NoAmplification   |
| blaIMP-01                | BAL_CASE04 |       |       |      | NoAmplification   |
| blaIMP-02                | BAL_CASE04 |       |       |      | NoAmplification   |
| blaMOX/blaC              | BAL_CASE04 |       |       |      | NoAmplification   |
| blaOCH                   | BAL_CASE04 |       |       |      | NoAmplification   |
| blaOKP                   | BAL_CASE04 |       |       |      | NoAmplification   |
| blaOXA1/blaC             | BAL_CASE04 |       |       |      | NoAmplification   |
| blaOXA10-01              | BAL_CASE04 |       |       |      | NoAmplification   |
| blaOXA10-02              | BAL_CASE04 |       |       |      | NoAmplification   |
| blaOXY                   | BAL_CASE04 |       |       |      | NoAmplification   |
| blaPAO                   | BAL_CASE04 |       |       |      | NoAmplification   |
| blaPER                   | BAL_CASE04 |       |       |      | NoAmplification   |
| blaPSE                   | BAL_CASE04 |       |       |      | NoAmplification   |
| blaROB                   | BAL_CASE04 | 30.33 | 80.93 | 1.79 |                   |
| blaSFO                   | BAL_CASE04 |       |       |      | CurveFitFailed    |
| blaSHV-01                | BAL_CASE04 |       |       |      | NoAmplification   |
| blaSHV-02                | BAL_CASE04 |       |       |      | NoAmplification   |
| blaTEM                   | BAL_CASE04 | 24.29 | 79.55 | 1.82 |                   |
| blaTLA                   | BAL_CASE04 |       |       |      | NoAmplification   |
| blaVEB                   | BAL_CASE04 |       |       |      | NoAmplification   |
| blaVIM                   | BAL_CASE04 |       |       |      | NoAmplification   |
| blaZ                     | BAL_CASE04 |       |       |      | NoAmplification   |
| carB                     | BAL_CASE04 |       |       |      | NoAmplification   |
| catA1                    | BAL_CASE04 |       |       |      | NoAmplification   |
| catB3                    | BAL_CASE04 |       |       |      | NoAmplification   |
| catB8                    | BAL_CASE04 | 30.11 | 81.24 | 1.94 |                   |



|            |            |       |       |      |                   |
|------------|------------|-------|-------|------|-------------------|
| ceoA       | BAL_CASE04 | 29.1  | 82.39 | 1.93 | MultipleMeltPeaks |
| cepA       | BAL_CASE04 |       |       |      | NoAmplification   |
| cfiA       | BAL_CASE04 | 32.62 | 84.68 | 1.71 |                   |
| cfr        | BAL_CASE04 |       |       |      | NoAmplification   |
| cfxA       | BAL_CASE04 | 21.55 | 77.46 | 1.7  |                   |
| cmeA       | BAL_CASE04 |       |       |      | NoAmplification   |
| cmlA1-01   | BAL_CASE04 |       |       |      | NoAmplification   |
| cmlA1-02   | BAL_CASE04 |       |       |      | NoAmplification   |
| cmr        | BAL_CASE04 | 32.27 | 81.06 | 1.86 |                   |
| cmx(A)     | BAL_CASE04 | 28.91 | 84.88 | 1.7  | MultipleMeltPeaks |
| cphA-01    | BAL_CASE04 | 31.69 | 85.35 | 1.95 | MultipleMeltPeaks |
| cphA-02    | BAL_CASE04 |       |       |      | NoAmplification   |
| dfrA1      | BAL_CASE04 |       |       |      | NoAmplification   |
| dfrA12     | BAL_CASE04 |       |       |      | NoAmplification   |
| emrD       | BAL_CASE04 |       |       |      | NoAmplification   |
| ereA       | BAL_CASE04 | 31.67 | 82.44 | 1.93 |                   |
| ereB       | BAL_CASE04 | 34.69 | 85.81 | 2.01 | MultipleMeltPeaks |
| erm(34)    | BAL_CASE04 |       |       |      | NoAmplification   |
| erm(35)    | BAL_CASE04 |       |       |      | NoAmplification   |
| erm(36)    | BAL_CASE04 |       |       |      | NoAmplification   |
| ermA       | BAL_CASE04 |       |       |      | NoAmplification   |
| ermA/ermTR | BAL_CASE04 |       |       |      | NoAmplification   |
| ermB       | BAL_CASE04 | 28.07 | 74.94 | 1.99 |                   |
| ermC       | BAL_CASE04 | 32.38 | 74.98 | 1.8  | MultipleMeltPeaks |
| ermF       | BAL_CASE04 | 29.98 | 74.35 | 1.98 |                   |
| ermJ/ermD  | BAL_CASE04 |       |       |      | NoAmplification   |
| ermK-01    | BAL_CASE04 |       |       |      | NoAmplification   |
| ermK-02    | BAL_CASE04 |       |       |      | NoAmplification   |
| ermT-01    | BAL_CASE04 |       |       |      | NoAmplification   |
| ermT-02    | BAL_CASE04 |       |       |      | NoAmplification   |
| ermX       | BAL_CASE04 |       |       |      | NoAmplification   |
| ermY       | BAL_CASE04 |       |       |      | NoAmplification   |
| fabK       | BAL_CASE04 | 30.03 | 79.28 | 2.11 |                   |
| floR       | BAL_CASE04 |       |       |      | NoAmplification   |
| folA       | BAL_CASE04 |       |       |      | NoAmplification   |
| fosB       | BAL_CASE04 |       |       |      | NoAmplification   |
| fosX       | BAL_CASE04 |       |       |      | NoAmplification   |
| fox5       | BAL_CASE04 | 27.06 | 86.42 | 1.85 |                   |
| imiR       | BAL_CASE04 |       |       |      | NoAmplification   |
| ImrA-01    | BAL_CASE04 | 34.09 | 87.24 | 1.97 |                   |
| intl       | BAL_CASE04 | 31.55 | 84.89 | 1.87 | MultipleMeltPeaks |
| intl1      | BAL_CASE04 | 20.27 | 87.57 | 1.88 |                   |
| IS613      | BAL_CASE04 | 26.89 | 79.3  | 1.59 |                   |
| lnuA-01    | BAL_CASE04 |       |       |      | NoAmplification   |
| lnuB-01    | BAL_CASE04 |       |       |      | NoAmplification   |
| lnuB-02    | BAL_CASE04 |       |       |      | NoAmplification   |

|               |            |       |       |      |                            |
|---------------|------------|-------|-------|------|----------------------------|
| lnuC          | BAL_CASE04 |       |       |      | BadR2, LowEfficiency, CtlS |
| marR-01       | BAL_CASE04 |       |       |      | NoAmplification            |
| matA/mel      | BAL_CASE04 | 26.52 | 77.6  | 1.99 |                            |
| mdet1         | BAL_CASE04 |       |       |      | NoAmplification            |
| mdtA          | BAL_CASE04 |       |       |      | NoAmplification            |
| mdtE/yhiU     | BAL_CASE04 |       |       |      | NoAmplification            |
| mecA          | BAL_CASE04 |       |       |      | NoAmplification            |
| mefA          | BAL_CASE04 | 25.7  | 80.69 | 1.91 |                            |
| mepA          | BAL_CASE04 | 34.5  | 87.11 | 1.85 |                            |
| mexA          | BAL_CASE04 |       |       |      | NoAmplification            |
| mexD          | BAL_CASE04 | 32.36 | 80.22 | 1.94 |                            |
| mexE          | BAL_CASE04 |       |       |      | NoAmplification            |
| mexF          | BAL_CASE04 | 29.57 | 81.27 | 1.74 |                            |
| mphA-01       | BAL_CASE04 | 31.78 | 86.86 | 1.78 |                            |
| mphA-02       | BAL_CASE04 | 29.79 | 89.45 | 1.52 | MultipleMeltPeaks          |
| mphB          | BAL_CASE04 |       |       |      | NoAmplification            |
| mphC          | BAL_CASE04 |       |       |      | NoAmplification            |
| msrA-01       | BAL_CASE04 |       |       |      | NoAmplification            |
| msrC-01       | BAL_CASE04 |       |       |      | NoAmplification            |
| mtrC-01       | BAL_CASE04 |       |       |      | NoAmplification            |
| mtrC-02       | BAL_CASE04 |       |       |      | NoAmplification            |
| mtrD-02       | BAL_CASE04 | 26.95 | 84.9  | 1.87 |                            |
| mtrD-03       | BAL_CASE04 |       |       |      | NoAmplification            |
| NDM1          | BAL_CASE04 |       |       |      | NoAmplification            |
| nimE          | BAL_CASE04 | 33.13 | 85.06 | 1.91 |                            |
| nisB          | BAL_CASE04 |       |       |      | NoAmplification            |
| oleC          | BAL_CASE04 | 34.56 | 84.21 | 1.87 |                            |
| oprD          | BAL_CASE04 | 28.77 | 81.78 | 1.97 |                            |
| oprJ          | BAL_CASE04 |       |       |      | NoAmplification            |
| pbp           | BAL_CASE04 |       |       |      | NoAmplification            |
| pbp2x         | BAL_CASE04 |       |       |      | NoAmplification            |
| Pbp5          | BAL_CASE04 |       |       |      | NoAmplification            |
| penA          | BAL_CASE04 |       |       |      | NoAmplification            |
| pikR1         | BAL_CASE04 |       |       |      | NoAmplification            |
| pikR2         | BAL_CASE04 | 29.84 | 85.73 | 1.92 |                            |
| pmrA          | BAL_CASE04 | 28.99 | 79.56 | 1.97 |                            |
| pncA          | BAL_CASE04 | 34.76 | 82.25 | 1.88 |                            |
| putative mulI | BAL_CASE04 | 32.54 | 84.17 | 1.87 |                            |
| qac           | BAL_CASE04 |       |       |      | NoAmplification            |
| qacA          | BAL_CASE04 |       |       |      | NoAmplification            |
| qacA/qacB     | BAL_CASE04 |       |       |      | NoAmplification            |
| qacEdelta1-0  | BAL_CASE04 |       |       |      | NoAmplification            |
| qacEdelta1-0  | BAL_CASE04 | 29.58 | 78.51 | 1.9  |                            |
| qacH-01       | BAL_CASE04 | 32.77 | 85.95 | 1.95 |                            |
| qacH-02       | BAL_CASE04 |       |       |      | NoAmplification            |
| qnrA          | BAL_CASE04 |       |       |      | NoAmplification            |

|              |            |       |       |                 |
|--------------|------------|-------|-------|-----------------|
| rarD-02      | BAL_CASE04 |       |       | NoAmplification |
| sat4         | BAL_CASE04 |       |       | NoAmplification |
| sdeB         | BAL_CASE04 |       |       | NoAmplification |
| spcN-01      | BAL_CASE04 |       |       | NoAmplification |
| speA         | BAL_CASE04 |       |       | NoAmplification |
| str          | BAL_CASE04 |       |       | NoAmplification |
| strA         | BAL_CASE04 |       |       | NoAmplification |
| strB         | BAL_CASE04 | 24.62 | 84.02 | 1.89            |
| sul1         | BAL_CASE04 |       |       | NoAmplification |
| sul2         | BAL_CASE04 |       |       | NoAmplification |
| sulA/foIP-01 | BAL_CASE04 | 27.35 | 81.11 | 1.94            |
| sulA/foIP-03 | BAL_CASE04 | 26.78 | 83.05 | 1.9             |
| tet(32)      | BAL_CASE04 | 28.83 | 81.03 | 1.88            |
| tet(34)      | BAL_CASE04 | 33.35 | 75.03 | 1.89            |
| tet(35)      | BAL_CASE04 |       |       | NoAmplification |
| tet(36)-A    | BAL_CASE04 |       |       | NoAmplification |
| tet(36)-B    | BAL_CASE04 |       |       | NoAmplification |
| tet(37)      | BAL_CASE04 | 27.22 | 76.34 | 1.87            |
| tetA-01      | BAL_CASE04 | 30.69 | 85.1  | 1.87            |
| tetA-02      | BAL_CASE04 |       |       | NoAmplification |
| tetB-01      | BAL_CASE04 |       |       | NoAmplification |
| tetB-02      | BAL_CASE04 | 28.15 | 79.14 | 1.85            |
| tetC-01      | BAL_CASE04 |       |       | NoAmplification |
| tetC-02      | BAL_CASE04 |       |       | NoAmplification |
| tetD-01      | BAL_CASE04 |       |       | NoAmplification |
| tetD-02      | BAL_CASE04 | 28.77 | 77.88 | 1.85            |
| tetE         | BAL_CASE04 |       |       | NoAmplification |
| tetG-01      | BAL_CASE04 |       |       | NoAmplification |
| tetG-02      | BAL_CASE04 |       |       | NoAmplification |
| tetH         | BAL_CASE04 |       |       | NoAmplification |
| tetJ         | BAL_CASE04 |       |       | NoAmplification |
| tetK         | BAL_CASE04 |       |       | NoAmplification |
| tetL-01      | BAL_CASE04 |       |       | NoAmplification |
| tetL-02      | BAL_CASE04 |       |       | NoAmplification |
| tetM-01      | BAL_CASE04 | 24.63 | 75.71 | 1.95            |
| tetM-02      | BAL_CASE04 | 25.58 | 77.35 | 1.92            |
| tetO-01      | BAL_CASE04 | 29.49 | 76.49 | 1.88            |
| tetPA        | BAL_CASE04 |       |       | NoAmplification |
| tetPB-01     | BAL_CASE04 |       |       | NoAmplification |
| tetPB-02     | BAL_CASE04 | 29.43 | 84.71 | 1.94            |
| tetPB-03     | BAL_CASE04 |       |       | NoAmplification |
| tetPB-05     | BAL_CASE04 |       |       | NoAmplification |
| tetQ         | BAL_CASE04 | 26.59 | 76.94 | 1.89            |
| tetR-02      | BAL_CASE04 |       |       | NoAmplification |
| tetR-03      | BAL_CASE04 |       |       | NoAmplification |
| tetS         | BAL_CASE04 |       |       | NoAmplification |

|             |            |       |       |      |                              |
|-------------|------------|-------|-------|------|------------------------------|
| tetT        | BAL_CASE04 |       |       |      | NoAmplification              |
| tetU-01     | BAL_CASE04 |       |       |      | NoAmplification              |
| tetV        | BAL_CASE04 |       |       |      | NoAmplification              |
| tetW-01     | BAL_CASE04 | 28.2  | 81.32 | 1.75 |                              |
| tetX        | BAL_CASE04 |       |       |      | NoAmplification              |
| tnpA-01     | BAL_CASE04 |       |       |      | NoAmplification              |
| tnpA-02     | BAL_CASE04 | 25.09 | 85.02 | 1.7  |                              |
| tnpA-03     | BAL_CASE04 | 33.62 | 74.85 | 2.01 |                              |
| tnpA-04     | BAL_CASE04 |       |       |      | NoAmplification              |
| tnpA-05     | BAL_CASE04 |       |       |      | NoAmplification              |
| tnpA-07     | BAL_CASE04 |       |       |      | NoAmplification              |
| tolC-01     | BAL_CASE04 |       |       |      | NoAmplification              |
| tolC-02     | BAL_CASE04 | 31.07 | 87.9  | 1.94 | MultipleMeltPeaks            |
| tolC-03     | BAL_CASE04 | 30.27 | 86.13 | 1.92 |                              |
| Tp614       | BAL_CASE04 |       |       |      | NoAmplification              |
| ttgA        | BAL_CASE04 |       |       |      | NoAmplification              |
| ttgB        | BAL_CASE04 |       |       |      | BadR2, CtlIsSmall, Saturatio |
| vanA        | BAL_CASE04 |       |       |      | NoAmplification              |
| vanB-01     | BAL_CASE04 |       |       |      | NoAmplification              |
| vanC-01     | BAL_CASE04 |       |       |      | NoAmplification              |
| vanC-02     | BAL_CASE04 |       |       |      | NoAmplification              |
| vanC-03     | BAL_CASE04 | 32.5  | 86.21 | 1.64 |                              |
| vanC1       | BAL_CASE04 |       |       |      | NoAmplification              |
| vanC2/vanC3 | BAL_CASE04 |       |       |      | NoAmplification              |
| vanG        | BAL_CASE04 |       |       |      | NoAmplification              |
| vanHB       | BAL_CASE04 |       |       |      | NoAmplification              |
| vanHD       | BAL_CASE04 |       |       |      | NoAmplification              |
| vanRA-01    | BAL_CASE04 |       |       |      | NoAmplification              |
| vanRA-02    | BAL_CASE04 |       |       |      | NoAmplification              |
| vanRB       | BAL_CASE04 |       |       |      | NoAmplification              |
| vanRC       | BAL_CASE04 |       |       |      | NoAmplification              |
| vanRC4      | BAL_CASE04 |       |       |      | NoAmplification              |
| vanRD       | BAL_CASE04 |       |       |      | NoAmplification              |
| vanSA       | BAL_CASE04 |       |       |      | NoAmplification              |
| vanSB       | BAL_CASE04 |       |       |      | NoAmplification              |
| vanSC-01    | BAL_CASE04 |       |       |      | NoAmplification              |
| vanSC-02    | BAL_CASE04 |       |       |      | NoAmplification              |
| vanTC-01    | BAL_CASE04 |       |       |      | NoAmplification              |
| vanTC-02    | BAL_CASE04 |       |       |      | NoAmplification              |
| vanTE       | BAL_CASE04 |       |       |      | NoAmplification              |
| vanTG       | BAL_CASE04 |       |       |      | NoAmplification              |
| vanWB       | BAL_CASE04 |       |       |      | NoAmplification              |
| vanWG       | BAL_CASE04 |       |       |      | NoAmplification              |
| vanXA       | BAL_CASE04 |       |       |      | NoAmplification              |
| vanXB       | BAL_CASE04 |       |       |      | NoAmplification              |
| vanXD       | BAL_CASE04 | 33.55 | 74.46 | 1.87 |                              |

|              |            |       |       |      |                             |
|--------------|------------|-------|-------|------|-----------------------------|
| vanYB        | BAL_CASE04 |       |       |      | NoAmplification             |
| vanYD-01     | BAL_CASE04 |       |       |      | NoAmplification             |
| vanYD-02     | BAL_CASE04 |       |       |      | NoAmplification             |
| vatB-01      | BAL_CASE04 |       |       |      | NoAmplification             |
| vatB-02      | BAL_CASE04 |       |       |      | NoAmplification             |
| vatC-01      | BAL_CASE04 | 35.41 | 81.43 | 1.84 |                             |
| vatC-02      | BAL_CASE04 | 32.24 | 86.82 | 1.9  |                             |
| vatE-01      | BAL_CASE04 | 29.8  | 77    | 1.98 |                             |
| vatE-02      | BAL_CASE04 |       |       |      | NoAmplification             |
| vgaA-01      | BAL_CASE04 |       |       |      | NoAmplification             |
| vgaA-02      | BAL_CASE04 |       |       |      | NoAmplification             |
| vgb-01       | BAL_CASE04 |       |       |      | BadR2, CtlsSmall, Saturatio |
| vgbB-01      | BAL_CASE04 |       |       |      | NoAmplification             |
| vgbB-02      | BAL_CASE04 |       |       |      | NoAmplification             |
| yceE/mdtG-0  | BAL_CASE04 |       |       |      | NoAmplification             |
| yceE/mdtG-0  | BAL_CASE04 |       |       |      | NoAmplification             |
| yceL/mdtH-0  | BAL_CASE04 |       |       |      | NoAmplification             |
| yceL/mdtH-0  | BAL_CASE04 |       |       |      | NoAmplification             |
| yceL/mdtH-0  | BAL_CASE04 |       |       |      | CurveFitFailed              |
| yidY/mdtL-01 | BAL_CASE04 | 31.21 | 83.37 | 1.96 | MultipleMeltPeaks           |
| yidY/mdtL-02 | BAL_CASE04 |       |       |      | NoAmplification             |

| Assay          | Sample     | Ct    | Tm    | Efficiency | Flags                       |
|----------------|------------|-------|-------|------------|-----------------------------|
| 16S rRNA       | BAL_CASE05 |       | 16.14 | 82.42      | 1.9                         |
| aac            | BAL_CASE05 |       | 30.49 | 80.85      | 1.32 MultipleMeltPeaks      |
| aac(6')-Ib(akz | BAL_CASE05 |       |       |            | NoAmplification             |
| aac(6')-Ib(akz | BAL_CASE05 | 35.33 | 82.86 | 1.86       | MultipleMeltPeaks           |
| aac(6')-Ib(akz | BAL_CASE05 |       |       |            | BadR2, CtIsSmall, Saturatio |
| aac(6')-II     | BAL_CASE05 |       | 36.41 | 85.21      | 1.71                        |
| aac(6')I1      | BAL_CASE05 |       |       |            | NoAmplification             |
| aacA/aphD      | BAL_CASE05 |       |       |            | NoAmplification             |
| aacC           | BAL_CASE05 | 30.56 | 88.62 | 1.8        |                             |
| aacC1          | BAL_CASE05 |       |       |            | NoAmplification             |
| aacC2          | BAL_CASE05 |       |       |            | NoAmplification             |
| aacC4          | BAL_CASE05 |       |       |            | NoAmplification             |
| aadA-01        | BAL_CASE05 | 37.48 | 86.86 | 1.78       |                             |
| aadA-02        | BAL_CASE05 | 35.81 | 80.63 | 1.86       |                             |
| aadA-1-01      | BAL_CASE05 | 32.03 | 81.64 | 1.9        |                             |
| aadA-1-02      | BAL_CASE05 |       |       |            | NoAmplification             |
| aadA1          | BAL_CASE05 | 32.61 | 84.06 | 2.02       |                             |
| aadA2-01       | BAL_CASE05 |       |       |            | NoAmplification             |
| aadA2-02       | BAL_CASE05 |       |       |            | NoAmplification             |
| aadA2-03       | BAL_CASE05 |       |       |            | NoAmplification             |
| aadA5-01       | BAL_CASE05 |       |       |            | NoAmplification             |
| aadA5-02       | BAL_CASE05 | 34.16 | 87.91 | 1.87       |                             |
| aadA9-01       | BAL_CASE05 | 34.56 | 88.69 | 1.87       |                             |
| aadA9-02       | BAL_CASE05 |       |       |            | NoAmplification             |
| aadD           | BAL_CASE05 |       |       |            | NoAmplification             |
| aadE           | BAL_CASE05 |       |       |            | NoAmplification             |
| acrA-01        | BAL_CASE05 | 30.71 | 88.8  | 1.94       |                             |
| acrA-02        | BAL_CASE05 | 33.21 | 83.52 | 1.93       |                             |
| acrA-03        | BAL_CASE05 |       |       |            | NoAmplification             |
| acrA-04        | BAL_CASE05 | 30.99 | 80.15 | 1.9        | MultipleMeltPeaks           |
| acrA-05        | BAL_CASE05 | 31.14 | 85.6  | 1.99       |                             |
| acrB-01        | BAL_CASE05 | 36.1  | 87.5  | 1.84       |                             |
| acrF           | BAL_CASE05 | 29.02 | 83.18 | 1.59       |                             |
| acrR-01        | BAL_CASE05 | 33.17 | 85.7  | 1.93       |                             |
| acrR-02        | BAL_CASE05 |       |       |            | NoAmplification             |
| Actin          | BAL_CASE05 | 20.01 | 87.19 | 1.87       |                             |
| adeA           | BAL_CASE05 | 32.49 | 83.58 | 1.85       |                             |
| ampC-01        | BAL_CASE05 | 32.6  | 85.02 | 1.98       |                             |
| ampC-02        | BAL_CASE05 | 34.38 | 83.62 | 1.94       |                             |
| ampC-04        | BAL_CASE05 | 31.91 | 78.7  | 1.7        | MultipleMeltPeaks           |
| ampC-05        | BAL_CASE05 |       |       |            | NoAmplification             |
| ampC-06        | BAL_CASE05 | 34.37 | 78.81 | 1.93       |                             |
| ampC-07        | BAL_CASE05 | 32.47 | 84.71 | 1.89       | MultipleMeltPeaks           |
| ampC-09        | BAL_CASE05 |       |       |            | NoAmplification             |
| ampC/blaDH     | BAL_CASE05 | 33.92 | 77.18 | 1.92       |                             |

|                          |            |       |       |      |                              |
|--------------------------|------------|-------|-------|------|------------------------------|
| aph                      | BAL_CASE05 |       |       |      | NoAmplification              |
| aph(2')-Id-01            | BAL_CASE05 |       |       |      | NoAmplification              |
| aph(2')-Id-02            | BAL_CASE05 |       |       |      | NoAmplification              |
| aph6ia                   | BAL_CASE05 | 34.96 | 78.99 | 1.85 |                              |
| aphA1(aka k <sub>z</sub> | BAL_CASE05 |       |       |      | NoAmplification              |
| bacA-01                  | BAL_CASE05 | 35.14 | 87.45 | 1.9  |                              |
| bacA-02                  | BAL_CASE05 | 35.21 | 87.31 | 1.75 |                              |
| BETA-globin              | BAL_CASE05 | 20.51 | 84.33 | 1.88 |                              |
| bla-ACC-1                | BAL_CASE05 | 34.58 | 86.27 | 1.87 |                              |
| bla-L1                   | BAL_CASE05 | 35.62 | 84.33 | 1.91 |                              |
| bla1                     | BAL_CASE05 |       |       |      | NoAmplification              |
| blaCMY                   | BAL_CASE05 |       |       |      | CurveFitFailed               |
| blaCMY2-01               | BAL_CASE05 |       |       |      | NoAmplification              |
| blaCMY2-02               | BAL_CASE05 | 29.78 | 85.44 | 1.94 |                              |
| blaCTX-M-01              | BAL_CASE05 |       |       |      | BadR2, CtlIsSmall, Saturatio |
| blaCTX-M-02              | BAL_CASE05 | 35.06 | 79.87 | 1.9  | MultipleMeltPeaks            |
| blaCTX-M-03              | BAL_CASE05 |       |       |      | NoAmplification              |
| blaCTX-M-04              | BAL_CASE05 | 35.01 | 86.8  | 1.85 |                              |
| blaCTX-M-05              | BAL_CASE05 | 32.14 | 77    | 1.8  |                              |
| blaCTX-M-06              | BAL_CASE05 |       |       |      | NoAmplification              |
| blaGES                   | BAL_CASE05 |       |       |      | NoAmplification              |
| blaIMP-01                | BAL_CASE05 |       |       |      | NoAmplification              |
| blaIMP-02                | BAL_CASE05 |       |       |      | NoAmplification              |
| blaMOX/blaC              | BAL_CASE05 |       |       |      | NoAmplification              |
| blaOCH                   | BAL_CASE05 |       |       |      | NoAmplification              |
| blaOKP                   | BAL_CASE05 |       |       |      | NoAmplification              |
| blaOXA1/blaC             | BAL_CASE05 |       |       |      | NoAmplification              |
| blaOXA10-01              | BAL_CASE05 |       |       |      | NoAmplification              |
| blaOXA10-02              | BAL_CASE05 |       |       |      | NoAmplification              |
| blaOXY                   | BAL_CASE05 |       |       |      | NoAmplification              |
| blaPAO                   | BAL_CASE05 |       |       |      | NoAmplification              |
| blaPER                   | BAL_CASE05 |       |       |      | NoAmplification              |
| blaPSE                   | BAL_CASE05 |       |       |      | NoAmplification              |
| blaROB                   | BAL_CASE05 |       |       |      | NoAmplification              |
| blaSFO                   | BAL_CASE05 | 31.76 | 84.19 | 1.96 | MultipleMeltPeaks            |
| blaSHV-01                | BAL_CASE05 |       |       |      | NoAmplification              |
| blaSHV-02                | BAL_CASE05 |       |       |      | NoAmplification              |
| blaTEM                   | BAL_CASE05 |       |       |      | NoAmplification              |
| blaTLA                   | BAL_CASE05 |       |       |      | NoAmplification              |
| blaVEB                   | BAL_CASE05 |       |       |      | NoAmplification              |
| blaVIM                   | BAL_CASE05 |       |       |      | NoAmplification              |
| blaZ                     | BAL_CASE05 |       |       |      | NoAmplification              |
| carB                     | BAL_CASE05 |       |       |      | NoAmplification              |
| catA1                    | BAL_CASE05 |       |       |      | NoAmplification              |
| catB3                    | BAL_CASE05 |       |       |      | NoAmplification              |
| catB8                    | BAL_CASE05 | 30.09 | 82.92 | 1.96 |                              |

|            |            |       |       |      |                              |
|------------|------------|-------|-------|------|------------------------------|
| ceoA       | BAL_CASE05 | 32.18 | 82.64 | 1.98 |                              |
| cepA       | BAL_CASE05 |       |       |      | NoAmplification              |
| cfiA       | BAL_CASE05 |       |       |      | NoAmplification              |
| cfr        | BAL_CASE05 |       |       |      | NoAmplification              |
| cfxA       | BAL_CASE05 | 19.74 | 77.65 | 1.82 |                              |
| cmeA       | BAL_CASE05 |       |       |      | NoAmplification              |
| cmlA1-01   | BAL_CASE05 |       |       |      | NoAmplification              |
| cmlA1-02   | BAL_CASE05 |       |       |      | NoAmplification              |
| cmr        | BAL_CASE05 |       |       |      | NoAmplification              |
| cmx(A)     | BAL_CASE05 | 28.98 | 87.01 | 1.91 |                              |
| cphA-01    | BAL_CASE05 | 29.62 | 85.51 | 1.93 |                              |
| cphA-02    | BAL_CASE05 | 37    | 76.81 | 1.84 | MultipleMeltPeaks            |
| dfrA1      | BAL_CASE05 |       |       |      | NoAmplification              |
| dfrA12     | BAL_CASE05 |       |       |      | NoAmplification              |
| emrD       | BAL_CASE05 |       |       |      | NoAmplification              |
| ereA       | BAL_CASE05 | 33.85 | 82.49 | 1.93 |                              |
| ereB       | BAL_CASE05 | 34.27 | 78.34 | 1.93 | MultipleMeltPeaks            |
| erm(34)    | BAL_CASE05 |       |       |      | NoAmplification              |
| erm(35)    | BAL_CASE05 |       |       |      | NoAmplification              |
| erm(36)    | BAL_CASE05 | 32.17 | 87.86 | 2.22 |                              |
| ermA       | BAL_CASE05 |       |       |      | NoAmplification              |
| ermA/ermTR | BAL_CASE05 |       |       |      | NoAmplification              |
| ermB       | BAL_CASE05 | 27.92 | 75.09 | 2.03 |                              |
| ermC       | BAL_CASE05 |       |       |      | NoAmplification              |
| ermF       | BAL_CASE05 | 19.42 | 74.81 | 1.96 |                              |
| ermJ/ermD  | BAL_CASE05 |       |       |      | NoAmplification              |
| ermK-01    | BAL_CASE05 |       |       |      | NoAmplification              |
| ermK-02    | BAL_CASE05 | 36.53 | 85.65 | 1.75 | MultipleMeltPeaks            |
| ermT-01    | BAL_CASE05 |       |       |      | NoAmplification              |
| ermT-02    | BAL_CASE05 |       |       |      | NoAmplification              |
| ermX       | BAL_CASE05 | 35.52 | 88.76 | 1.81 |                              |
| ermY       | BAL_CASE05 |       |       |      | NoAmplification              |
| fabK       | BAL_CASE05 | 28.41 | 79.85 | 1.94 |                              |
| floR       | BAL_CASE05 |       |       |      | NoAmplification              |
| folA       | BAL_CASE05 |       |       |      | NoAmplification              |
| fosB       | BAL_CASE05 |       |       |      | LowEfficiency, CtIsSmall, S: |
| fosX       | BAL_CASE05 |       |       |      | NoAmplification              |
| fox5       | BAL_CASE05 | 28.45 | 86.31 | 1.79 |                              |
| imiR       | BAL_CASE05 |       |       |      | NoAmplification              |
| ImrA-01    | BAL_CASE05 | 36.58 | 91.19 | 1.74 |                              |
| intl       | BAL_CASE05 | 32.18 | 85.18 | 1.75 |                              |
| intl1      | BAL_CASE05 | 21.06 | 87.63 | 1.9  |                              |
| IS613      | BAL_CASE05 | 25    | 79.62 | 1.61 |                              |
| lnuA-01    | BAL_CASE05 |       |       |      | NoAmplification              |
| lnuB-01    | BAL_CASE05 |       |       |      | NoAmplification              |
| lnuB-02    | BAL_CASE05 |       |       |      | NoAmplification              |



|               |            |       |       |      |                            |
|---------------|------------|-------|-------|------|----------------------------|
| lnuC          | BAL_CASE05 |       |       |      | NoAmplification            |
| marR-01       | BAL_CASE05 |       |       |      | NoAmplification            |
| matA/mel      | BAL_CASE05 | 25.56 | 77.66 | 2.01 |                            |
| mdet1         | BAL_CASE05 |       |       |      | NoAmplification            |
| mdtA          | BAL_CASE05 |       |       |      | NoAmplification            |
| mdtE/yhiU     | BAL_CASE05 |       |       |      | NoAmplification            |
| mecA          | BAL_CASE05 |       |       |      | NoAmplification            |
| mefA          | BAL_CASE05 | 24.98 | 80.75 | 1.94 |                            |
| mepA          | BAL_CASE05 | 33.51 | 83.22 | 1.98 |                            |
| mexA          | BAL_CASE05 |       |       |      | NoAmplification            |
| mexD          | BAL_CASE05 |       |       |      | CurveFitFailed             |
| mexE          | BAL_CASE05 | 36.44 | 83.56 | 1.8  | MultipleMeltPeaks          |
| mexF          | BAL_CASE05 | 28.31 | 84.81 | 1.77 | MultipleMeltPeaks          |
| mphA-01       | BAL_CASE05 | 32    | 86.84 | 1.79 | MultipleMeltPeaks          |
| mphA-02       | BAL_CASE05 | 32.05 | 85.09 | 1.46 | MultipleMeltPeaks          |
| mphB          | BAL_CASE05 |       |       |      | NoAmplification            |
| mphC          | BAL_CASE05 |       |       |      | NoAmplification            |
| msrA-01       | BAL_CASE05 |       |       |      | NoAmplification            |
| msrC-01       | BAL_CASE05 |       |       |      | NoAmplification            |
| mtrC-01       | BAL_CASE05 |       |       |      | NoAmplification            |
| mtrC-02       | BAL_CASE05 | 32.76 | 84.45 | 1.94 |                            |
| mtrD-02       | BAL_CASE05 | 27.51 | 83.28 | 1.92 | MultipleMeltPeaks          |
| mtrD-03       | BAL_CASE05 | 30.79 | 79.91 | 1.78 |                            |
| NDM1          | BAL_CASE05 |       |       |      | NoAmplification            |
| nimE          | BAL_CASE05 |       |       |      | NoAmplification            |
| nisB          | BAL_CASE05 |       |       |      | NoAmplification            |
| oleC          | BAL_CASE05 |       |       |      | NoAmplification            |
| oprD          | BAL_CASE05 | 28.96 | 86.76 | 1.98 |                            |
| oprJ          | BAL_CASE05 | 32.74 | 89.6  | 1.89 |                            |
| pbp           | BAL_CASE05 |       |       |      | NoAmplification            |
| pbp2x         | BAL_CASE05 | 27.62 | 75.81 | 1.82 |                            |
| Pbp5          | BAL_CASE05 |       |       |      | NoAmplification            |
| penA          | BAL_CASE05 |       |       |      | NoAmplification            |
| pikR1         | BAL_CASE05 |       |       |      | BadR2, CtlSmall, Saturatio |
| pikR2         | BAL_CASE05 | 29.91 | 85.74 | 2.02 |                            |
| pmrA          | BAL_CASE05 | 26.41 | 79.29 | 2.09 |                            |
| pncA          | BAL_CASE05 | 34.28 | 89.04 | 1.91 | MultipleMeltPeaks          |
| putative mulI | BAL_CASE05 | 32.58 | 84.3  | 1.94 |                            |
| qac           | BAL_CASE05 |       |       |      | NoAmplification            |
| qacA          | BAL_CASE05 |       |       |      | NoAmplification            |
| qacA/qacB     | BAL_CASE05 | 34.64 | 83.47 | 1.92 |                            |
| qacEdelta1-0  | BAL_CASE05 |       |       |      | NoAmplification            |
| qacEdelta1-0  | BAL_CASE05 | 34.06 | 75.84 | 1.82 |                            |
| qacH-01       | BAL_CASE05 | 33.09 | 86    | 1.96 |                            |
| qacH-02       | BAL_CASE05 | 35.57 | 88.93 | 1.76 | MultipleMeltPeaks          |
| qnrA          | BAL_CASE05 |       |       |      | BadR2, CtlSmall, Saturatio |

|              |            |       |       |      |                            |
|--------------|------------|-------|-------|------|----------------------------|
| rarD-02      | BAL_CASE05 |       |       |      | BadR2, CtlSmall, Saturatio |
| sat4         | BAL_CASE05 |       |       |      | NoAmplification            |
| sdeB         | BAL_CASE05 |       |       |      | NoAmplification            |
| spcN-01      | BAL_CASE05 | 32.8  | 88.26 | 1.91 |                            |
| speA         | BAL_CASE05 |       |       |      | NoAmplification            |
| str          | BAL_CASE05 |       |       |      | NoAmplification            |
| strA         | BAL_CASE05 |       |       |      | NoAmplification            |
| strB         | BAL_CASE05 |       |       |      | NoAmplification            |
| sul1         | BAL_CASE05 |       |       |      | NoAmplification            |
| sul2         | BAL_CASE05 | 24.86 | 85.81 | 1.65 |                            |
| sulA/foIP-01 | BAL_CASE05 | 25.65 | 80.48 | 1.96 |                            |
| sulA/foIP-03 | BAL_CASE05 | 25.17 | 83.71 | 1.94 |                            |
| tet(32)      | BAL_CASE05 | 22.52 | 81.45 | 1.93 |                            |
| tet(34)      | BAL_CASE05 | 32.79 | 75.24 | 1.9  |                            |
| tet(35)      | BAL_CASE05 |       |       |      | NoAmplification            |
| tet(36)-A    | BAL_CASE05 |       |       |      | NoAmplification            |
| tet(36)-B    | BAL_CASE05 |       |       |      | NoAmplification            |
| tet(37)      | BAL_CASE05 |       |       |      | NoAmplification            |
| tetA-01      | BAL_CASE05 | 31.87 | 85.18 | 1.91 |                            |
| tetA-02      | BAL_CASE05 |       |       |      | NoAmplification            |
| tetB-01      | BAL_CASE05 | 26.99 | 88.67 | 1.88 | MultipleMeltPeaks          |
| tetB-02      | BAL_CASE05 | 26.71 | 79.56 | 1.9  |                            |
| tetC-01      | BAL_CASE05 | 27.06 | 75.06 | 1.7  |                            |
| tetC-02      | BAL_CASE05 | 26.98 | 75.91 | 1.89 |                            |
| tetD-01      | BAL_CASE05 |       |       |      | NoAmplification            |
| tetD-02      | BAL_CASE05 | 30.1  | 77.53 | 1.87 |                            |
| tetE         | BAL_CASE05 |       |       |      | NoAmplification            |
| tetG-01      | BAL_CASE05 |       |       |      | NoAmplification            |
| tetG-02      | BAL_CASE05 |       |       |      | NoAmplification            |
| tetH         | BAL_CASE05 |       |       |      | NoAmplification            |
| tetJ         | BAL_CASE05 |       |       |      | NoAmplification            |
| tetK         | BAL_CASE05 |       |       |      | NoAmplification            |
| tetL-01      | BAL_CASE05 |       |       |      | NoAmplification            |
| tetL-02      | BAL_CASE05 |       |       |      | NoAmplification            |
| tetM-01      | BAL_CASE05 | 21.14 | 76.26 | 1.92 |                            |
| tetM-02      | BAL_CASE05 | 20.73 | 77.72 | 1.99 |                            |
| tetO-01      | BAL_CASE05 | 29.36 | 76.62 | 1.91 |                            |
| tetPA        | BAL_CASE05 |       |       |      | NoAmplification            |
| tetPB-01     | BAL_CASE05 | 36.74 | 83.42 | 1.79 |                            |
| tetPB-02     | BAL_CASE05 | 31.31 | 84.83 | 1.67 | MultipleMeltPeaks          |
| tetPB-03     | BAL_CASE05 |       |       |      | NoAmplification            |
| tetPB-05     | BAL_CASE05 |       |       |      | NoAmplification            |
| tetQ         | BAL_CASE05 | 19.67 | 76.41 | 1.95 |                            |
| tetR-02      | BAL_CASE05 | 33.98 | 87.68 | 1.83 |                            |
| tetR-03      | BAL_CASE05 | 28.44 | 76    | 1.89 |                            |
| tetS         | BAL_CASE05 | 33.84 | 77.37 | 1.81 | MultipleMeltPeaks          |

|             |            |       |       |      |                            |
|-------------|------------|-------|-------|------|----------------------------|
| tetT        | BAL_CASE05 |       |       |      | NoAmplification            |
| tetU-01     | BAL_CASE05 |       |       |      | NoAmplification            |
| tetV        | BAL_CASE05 |       |       |      | NoAmplification            |
| tetW-01     | BAL_CASE05 | 23.91 | 81.67 | 1.88 |                            |
| tetX        | BAL_CASE05 |       |       |      | NoAmplification            |
| tnpA-01     | BAL_CASE05 |       |       |      | NoAmplification            |
| tnpA-02     | BAL_CASE05 |       |       |      | NoAmplification            |
| tnpA-03     | BAL_CASE05 |       |       |      | NoAmplification            |
| tnpA-04     | BAL_CASE05 |       |       |      | NoAmplification            |
| tnpA-05     | BAL_CASE05 |       |       |      | NoAmplification            |
| tnpA-07     | BAL_CASE05 |       |       |      | NoAmplification            |
| tolC-01     | BAL_CASE05 |       |       |      | NoAmplification            |
| tolC-02     | BAL_CASE05 | 31.11 | 87.98 | 1.95 |                            |
| tolC-03     | BAL_CASE05 | 30.99 | 85.9  | 1.9  |                            |
| Tp614       | BAL_CASE05 |       |       |      | NoAmplification            |
| ttgA        | BAL_CASE05 |       |       |      | NoAmplification            |
| ttgB        | BAL_CASE05 |       |       |      | NoAmplification            |
| vanA        | BAL_CASE05 |       |       |      | NoAmplification            |
| vanB-01     | BAL_CASE05 | 32.92 | 73.16 | 1.64 |                            |
| vanC-01     | BAL_CASE05 |       |       |      | NoAmplification            |
| vanC-02     | BAL_CASE05 |       |       |      | NoAmplification            |
| vanC-03     | BAL_CASE05 | 33.07 | 80.42 | 1.61 |                            |
| vanC1       | BAL_CASE05 |       |       |      | NoAmplification            |
| vanC2/vanC3 | BAL_CASE05 |       |       |      | NoAmplification            |
| vanG        | BAL_CASE05 |       |       |      | NoAmplification            |
| vanHB       | BAL_CASE05 | 35    | 85.92 | 1.94 | MultipleMeltPeaks          |
| vanHD       | BAL_CASE05 |       |       |      | NoAmplification            |
| vanRA-01    | BAL_CASE05 |       |       |      | NoAmplification            |
| vanRA-02    | BAL_CASE05 |       |       |      | NoAmplification            |
| vanRB       | BAL_CASE05 |       |       |      | NoAmplification            |
| vanRC       | BAL_CASE05 |       |       |      | NoAmplification            |
| vanRC4      | BAL_CASE05 |       |       |      | NoAmplification            |
| vanRD       | BAL_CASE05 |       |       |      | NoAmplification            |
| vanSA       | BAL_CASE05 |       |       |      | NoAmplification            |
| vanSB       | BAL_CASE05 |       |       |      | NoAmplification            |
| vanSC-01    | BAL_CASE05 |       |       |      | NoAmplification            |
| vanSC-02    | BAL_CASE05 |       |       |      | NoAmplification            |
| vanTC-01    | BAL_CASE05 |       |       |      | NoAmplification            |
| vanTC-02    | BAL_CASE05 |       |       |      | NoAmplification            |
| vanTE       | BAL_CASE05 |       |       |      | NoAmplification            |
| vanTG       | BAL_CASE05 |       |       |      | NoAmplification            |
| vanWB       | BAL_CASE05 |       |       |      | NoAmplification            |
| vanWG       | BAL_CASE05 |       |       |      | BadR2, CtlSmall, Saturatio |
| vanXA       | BAL_CASE05 |       |       |      | NoAmplification            |
| vanXB       | BAL_CASE05 |       |       |      | NoAmplification            |
| vanXD       | BAL_CASE05 | 33.15 | 74.72 | 1.85 |                            |

|              |            |       |       |      |                   |
|--------------|------------|-------|-------|------|-------------------|
| vanYB        | BAL_CASE05 |       |       |      | NoAmplification   |
| vanYD-01     | BAL_CASE05 |       |       |      | NoAmplification   |
| vanYD-02     | BAL_CASE05 |       |       |      | NoAmplification   |
| vatB-01      | BAL_CASE05 |       |       |      | NoAmplification   |
| vatB-02      | BAL_CASE05 |       |       |      | NoAmplification   |
| vatC-01      | BAL_CASE05 |       |       |      | NoAmplification   |
| vatC-02      | BAL_CASE05 | 35.74 | 87.83 | 1.79 |                   |
| vatE-01      | BAL_CASE05 | 30.03 | 77.33 | 2.02 |                   |
| vatE-02      | BAL_CASE05 |       |       |      | NoAmplification   |
| vgaA-01      | BAL_CASE05 |       |       |      | NoAmplification   |
| vgaA-02      | BAL_CASE05 |       |       |      | NoAmplification   |
| vgb-01       | BAL_CASE05 | 34.99 | 84.98 | 1.77 | MultipleMeltPeaks |
| vgbB-01      | BAL_CASE05 | 31.35 | 74.9  | 1.94 |                   |
| vgbB-02      | BAL_CASE05 |       |       |      | NoAmplification   |
| yceE/mdtG-0  | BAL_CASE05 |       |       |      | NoAmplification   |
| yceE/mdtG-0  | BAL_CASE05 | 36.42 | 81.14 | 1.85 |                   |
| yceL/mdtH-0  | BAL_CASE05 | 35.72 | 75.06 | 1.89 | MultipleMeltPeaks |
| yceL/mdtH-0  | BAL_CASE05 |       |       |      | NoAmplification   |
| yceL/mdtH-0  | BAL_CASE05 |       |       |      | NoAmplification   |
| yidY/mdtL-01 | BAL_CASE05 | 31.19 | 84.52 | 1.97 |                   |
| yidY/mdtL-02 | BAL_CASE05 |       |       |      | NoAmplification   |

| Assay          | Sample     | Ct    | Tm    | Efficiency | Flags                  |
|----------------|------------|-------|-------|------------|------------------------|
| 16S rRNA       | BAL_CASE06 |       | 16.43 | 82.3       | 1.95                   |
| aac            | BAL_CASE06 |       | 33.28 | 77.38      | 1.6                    |
| aac(6')-Ib(akz | BAL_CASE06 |       |       |            | NoAmplification        |
| aac(6')-Ib(akz | BAL_CASE06 | 31.22 | 82.88 | 1.96       | MultipleMeltPeaks      |
| aac(6')-Ib(akz | BAL_CASE06 |       |       |            | NoAmplification        |
| aac(6')-II     | BAL_CASE06 |       |       |            | NoAmplification        |
| aac(6')I1      | BAL_CASE06 |       |       |            | NoAmplification        |
| aacA/aphD      | BAL_CASE06 |       |       |            | NoAmplification        |
| aacC           | BAL_CASE06 |       | 33    | 77.46      | 1.84 MultipleMeltPeaks |
| aacC1          | BAL_CASE06 |       |       |            | NoAmplification        |
| aacC2          | BAL_CASE06 |       |       |            | NoAmplification        |
| aacC4          | BAL_CASE06 | 35.25 | 78.4  | 1.88       | MultipleMeltPeaks      |
| aadA-01        | BAL_CASE06 |       |       |            | NoAmplification        |
| aadA-02        | BAL_CASE06 |       |       |            | NoAmplification        |
| aadA-1-01      | BAL_CASE06 | 26.82 | 79.68 | 1.91       |                        |
| aadA-1-02      | BAL_CASE06 | 26.19 | 76.47 | 2.03       |                        |
| aadA1          | BAL_CASE06 |       |       |            | NoAmplification        |
| aadA2-01       | BAL_CASE06 |       |       |            | NoAmplification        |
| aadA2-02       | BAL_CASE06 | 34.49 | 75.08 | 2.02       |                        |
| aadA2-03       | BAL_CASE06 |       |       |            | NoAmplification        |
| aadA5-01       | BAL_CASE06 |       |       |            | NoAmplification        |
| aadA5-02       | BAL_CASE06 | 36.5  | 81.08 | 1.82       | MultipleMeltPeaks      |
| aadA9-01       | BAL_CASE06 |       |       |            | NoAmplification        |
| aadA9-02       | BAL_CASE06 |       |       |            | NoAmplification        |
| aadD           | BAL_CASE06 |       |       |            | NoAmplification        |
| aadE           | BAL_CASE06 |       |       |            | NoAmplification        |
| acrA-01        | BAL_CASE06 | 32.68 | 88.77 | 1.91       |                        |
| acrA-02        | BAL_CASE06 | 34.54 | 82.59 | 1.86       |                        |
| acrA-03        | BAL_CASE06 |       |       |            | NoAmplification        |
| acrA-04        | BAL_CASE06 | 30.02 | 80.28 | 1.97       | MultipleMeltPeaks      |
| acrA-05        | BAL_CASE06 | 31.65 | 88.43 | 1.99       | MultipleMeltPeaks      |
| acrB-01        | BAL_CASE06 |       |       |            | NoAmplification        |
| acrF           | BAL_CASE06 | 33.22 | 78.84 | 1.8        | MultipleMeltPeaks      |
| acrR-01        | BAL_CASE06 |       |       |            | NoAmplification        |
| acrR-02        | BAL_CASE06 |       |       |            | NoAmplification        |
| Actin          | BAL_CASE06 | 20.54 | 87.29 | 1.91       |                        |
| adeA           | BAL_CASE06 |       |       |            | NoAmplification        |
| ampC-01        | BAL_CASE06 | 33.14 | 85.51 | 2.03       | MultipleMeltPeaks      |
| ampC-02        | BAL_CASE06 |       |       |            | NoAmplification        |
| ampC-04        | BAL_CASE06 | 33.82 | 78.26 | 1.93       |                        |
| ampC-05        | BAL_CASE06 |       |       |            | NoAmplification        |
| ampC-06        | BAL_CASE06 | 37.89 | 79.05 | 1.82       |                        |
| ampC-07        | BAL_CASE06 | 36.4  | 88.53 | 1.76       |                        |
| ampC-09        | BAL_CASE06 |       |       |            | NoAmplification        |
| ampC/blaDH     | BAL_CASE06 | 33.14 | 77.01 | 1.86       | MultipleMeltPeaks      |

|                          |            |       |       |      |                             |
|--------------------------|------------|-------|-------|------|-----------------------------|
| aph                      | BAL_CASE06 |       |       |      | NoAmplification             |
| aph(2')-Id-01            | BAL_CASE06 |       |       |      | NoAmplification             |
| aph(2')-Id-02            | BAL_CASE06 |       |       |      | NoAmplification             |
| aph6ia                   | BAL_CASE06 |       |       |      | NoAmplification             |
| aphA1(aka k <sub>z</sub> | BAL_CASE06 |       |       |      | NoAmplification             |
| bacA-01                  | BAL_CASE06 |       |       |      | CurveFitFailed              |
| bacA-02                  | BAL_CASE06 |       |       |      | NoAmplification             |
| BETA-globin              | BAL_CASE06 | 20.93 | 84.35 | 1.93 |                             |
| bla-ACC-1                | BAL_CASE06 |       |       |      | NoAmplification             |
| bla-L1                   | BAL_CASE06 | 32.55 | 82.29 | 1.83 | MultipleMeltPeaks           |
| bla1                     | BAL_CASE06 |       |       |      | NoAmplification             |
| blaCMY                   | BAL_CASE06 | 37.05 | 77.87 | 1.86 |                             |
| blaCMY2-01               | BAL_CASE06 |       |       |      | NoAmplification             |
| blaCMY2-02               | BAL_CASE06 | 30.36 | 82.45 | 1.93 | MultipleMeltPeaks           |
| blaCTX-M-01              | BAL_CASE06 |       |       |      | NoAmplification             |
| blaCTX-M-02              | BAL_CASE06 |       |       |      | CurveFitFailed              |
| blaCTX-M-03              | BAL_CASE06 |       |       |      | NoAmplification             |
| blaCTX-M-04              | BAL_CASE06 | 37.17 | 87.2  | 1.77 |                             |
| blaCTX-M-05              | BAL_CASE06 | 33.87 | 76.55 | 1.76 |                             |
| blaCTX-M-06              | BAL_CASE06 |       |       |      | NoAmplification             |
| blaGES                   | BAL_CASE06 |       |       |      | NoAmplification             |
| blaIMP-01                | BAL_CASE06 |       |       |      | NoAmplification             |
| blaIMP-02                | BAL_CASE06 |       |       |      | NoAmplification             |
| blaMOX/blaC              | BAL_CASE06 |       |       |      | NoAmplification             |
| blaOCH                   | BAL_CASE06 |       |       |      | NoAmplification             |
| blaOKP                   | BAL_CASE06 |       |       |      | NoAmplification             |
| blaOXA1/blaC             | BAL_CASE06 |       |       |      | NoAmplification             |
| blaOXA10-01              | BAL_CASE06 |       |       |      | NoAmplification             |
| blaOXA10-02              | BAL_CASE06 |       |       |      | NoAmplification             |
| blaOXY                   | BAL_CASE06 |       |       |      | NoAmplification             |
| blaPAO                   | BAL_CASE06 |       |       |      | NoAmplification             |
| blaPER                   | BAL_CASE06 |       |       |      | BadR2, LowEfficiency, CtIs5 |
| blaPSE                   | BAL_CASE06 |       |       |      | NoAmplification             |
| blaROB                   | BAL_CASE06 |       |       |      | NoAmplification             |
| blaSFO                   | BAL_CASE06 | 32.38 | 80.13 | 1.88 | MultipleMeltPeaks           |
| blaSHV-01                | BAL_CASE06 |       |       |      | NoAmplification             |
| blaSHV-02                | BAL_CASE06 |       |       |      | NoAmplification             |
| blaTEM                   | BAL_CASE06 | 34.5  | 75.11 | 1.99 |                             |
| blaTLA                   | BAL_CASE06 |       |       |      | NoAmplification             |
| blaVEB                   | BAL_CASE06 |       |       |      | NoAmplification             |
| blaVIM                   | BAL_CASE06 |       |       |      | NoAmplification             |
| blaZ                     | BAL_CASE06 |       |       |      | NoAmplification             |
| carB                     | BAL_CASE06 |       |       |      | NoAmplification             |
| catA1                    | BAL_CASE06 |       |       |      | NoAmplification             |
| catB3                    | BAL_CASE06 |       |       |      | NoAmplification             |
| catB8                    | BAL_CASE06 | 28.2  | 81.96 | 1.97 |                             |

|            |            |       |       |      |                              |
|------------|------------|-------|-------|------|------------------------------|
| ceoA       | BAL_CASE06 | 30.91 | 82.41 | 1.99 |                              |
| cepA       | BAL_CASE06 | 36.79 | 82.35 | 1.89 |                              |
| cfiA       | BAL_CASE06 |       |       |      | NoAmplification              |
| cfr        | BAL_CASE06 |       |       |      | NoAmplification              |
| cfxA       | BAL_CASE06 | 17.11 | 77.66 | 1.86 |                              |
| cmeA       | BAL_CASE06 |       |       |      | NoAmplification              |
| cmlA1-01   | BAL_CASE06 |       |       |      | NoAmplification              |
| cmlA1-02   | BAL_CASE06 | 33.63 | 87.66 | 1.95 |                              |
| cmr        | BAL_CASE06 |       |       |      | NoAmplification              |
| cmx(A)     | BAL_CASE06 | 27.11 | 89.95 | 1.96 | MultipleMeltPeaks            |
| cphA-01    | BAL_CASE06 | 32.42 | 81.01 | 1.95 | MultipleMeltPeaks            |
| cphA-02    | BAL_CASE06 | 36.12 | 82.43 | 1.85 |                              |
| dfrA1      | BAL_CASE06 |       |       |      | NoAmplification              |
| dfrA12     | BAL_CASE06 |       |       |      | NoAmplification              |
| emrD       | BAL_CASE06 |       |       |      | NoAmplification              |
| ereA       | BAL_CASE06 | 37.57 | 83.11 | 1.81 |                              |
| ereB       | BAL_CASE06 | 36.16 | 89.24 | 1.81 | MultipleMeltPeaks            |
| erm(34)    | BAL_CASE06 |       |       |      | NoAmplification              |
| erm(35)    | BAL_CASE06 |       |       |      | NoAmplification              |
| erm(36)    | BAL_CASE06 | 34.06 | 86.19 | 2.05 |                              |
| ermA       | BAL_CASE06 |       |       |      | NoAmplification              |
| ermA/ermTR | BAL_CASE06 |       |       |      | NoAmplification              |
| ermB       | BAL_CASE06 | 25.15 | 75.04 | 2.1  |                              |
| ermC       | BAL_CASE06 |       |       |      | NoAmplification              |
| ermF       | BAL_CASE06 | 23.15 | 74.72 | 2    |                              |
| ermJ/ermD  | BAL_CASE06 |       |       |      | NoAmplification              |
| ermK-01    | BAL_CASE06 | 33.55 | 78.71 | 1.98 |                              |
| ermK-02    | BAL_CASE06 | 39.19 | 85.84 | 1.54 | MultipleMeltPeaks            |
| ermT-01    | BAL_CASE06 |       |       |      | NoAmplification              |
| ermT-02    | BAL_CASE06 |       |       |      | CurveFitFailed               |
| ermX       | BAL_CASE06 | 25.35 | 83.84 | 1.84 |                              |
| ermY       | BAL_CASE06 |       |       |      | NoAmplification              |
| fabK       | BAL_CASE06 | 28.44 | 79.54 | 1.94 |                              |
| floR       | BAL_CASE06 |       |       |      | NoAmplification              |
| folA       | BAL_CASE06 |       |       |      | NoAmplification              |
| fosB       | BAL_CASE06 |       |       |      | LowEfficiency, CtIsSmall, S: |
| fosX       | BAL_CASE06 |       |       |      | NoAmplification              |
| fox5       | BAL_CASE06 | 28.96 | 86.28 | 1.94 |                              |
| imiR       | BAL_CASE06 |       |       |      | NoAmplification              |
| ImrA-01    | BAL_CASE06 | 40.02 | 80.81 | 1.75 |                              |
| intl       | BAL_CASE06 | 34.68 | 85.04 | 1.91 |                              |
| intl1      | BAL_CASE06 | 21.43 | 87.28 | 1.99 |                              |
| IS613      | BAL_CASE06 | 24.76 | 80.42 | 1.78 |                              |
| lnuA-01    | BAL_CASE06 |       |       |      | NoAmplification              |
| lnuB-01    | BAL_CASE06 |       |       |      | NoAmplification              |
| lnuB-02    | BAL_CASE06 |       |       |      | NoAmplification              |

|                |            |       |       |      |                   |
|----------------|------------|-------|-------|------|-------------------|
| lnuC           | BAL_CASE06 |       |       |      | NoAmplification   |
| marR-01        | BAL_CASE06 | 34.62 | 85.54 | 1.94 |                   |
| matA/mel       | BAL_CASE06 | 22.78 | 77.71 | 2.06 |                   |
| mdet1          | BAL_CASE06 |       |       |      | NoAmplification   |
| mdtA           | BAL_CASE06 |       |       |      | NoAmplification   |
| mdtE/yhiU      | BAL_CASE06 |       |       |      | NoAmplification   |
| mecA           | BAL_CASE06 |       |       |      | NoAmplification   |
| mefA           | BAL_CASE06 | 22.47 | 80.84 | 1.99 |                   |
| mepA           | BAL_CASE06 | 35.52 | 81.7  | 1.91 |                   |
| mexA           | BAL_CASE06 |       |       |      | NoAmplification   |
| mexD           | BAL_CASE06 | 35.68 | 79.82 | 1.95 |                   |
| mexE           | BAL_CASE06 | 36.53 | 88.37 | 1.82 |                   |
| mexF           | BAL_CASE06 | 28.43 | 87.42 | 1.89 | MultipleMeltPeaks |
| mphA-01        | BAL_CASE06 | 31.56 | 89.14 | 2.01 |                   |
| mphA-02        | BAL_CASE06 | 32.64 | 82.79 | 1.58 | MultipleMeltPeaks |
| mphB           | BAL_CASE06 |       |       |      | NoAmplification   |
| mphC           | BAL_CASE06 |       |       |      | NoAmplification   |
| msrA-01        | BAL_CASE06 |       |       |      | NoAmplification   |
| msrC-01        | BAL_CASE06 |       |       |      | NoAmplification   |
| mtrC-01        | BAL_CASE06 |       |       |      | NoAmplification   |
| mtrC-02        | BAL_CASE06 | 31.88 | 84.35 | 1.94 |                   |
| mtrD-02        | BAL_CASE06 | 27.82 | 81.48 | 1.9  |                   |
| mtrD-03        | BAL_CASE06 |       |       |      | NoAmplification   |
| NDM1           | BAL_CASE06 | 34.81 | 80.29 | 1.98 |                   |
| nimE           | BAL_CASE06 | 34.96 | 85.03 | 1.99 |                   |
| nisB           | BAL_CASE06 |       |       |      | NoAmplification   |
| oleC           | BAL_CASE06 |       |       |      | NoAmplification   |
| oprD           | BAL_CASE06 | 30.46 | 81.92 | 1.99 |                   |
| oprJ           | BAL_CASE06 | 35    | 86.13 | 1.78 | MultipleMeltPeaks |
| pbp            | BAL_CASE06 |       |       |      | NoAmplification   |
| pbp2x          | BAL_CASE06 |       |       |      | NoAmplification   |
| Pbp5           | BAL_CASE06 |       |       |      | NoAmplification   |
| penA           | BAL_CASE06 |       |       |      | NoAmplification   |
| pikR1          | BAL_CASE06 | 39.04 | 89.02 | 1.62 | MultipleMeltPeaks |
| pikR2          | BAL_CASE06 | 33.2  | 84.64 | 1.84 | MultipleMeltPeaks |
| pmrA           | BAL_CASE06 | 25.26 | 79    | 2.13 |                   |
| pncA           | BAL_CASE06 | 31.42 | 89.67 | 1.8  |                   |
| putative multi | BAL_CASE06 | 38.25 | 77.27 | 1.79 | MultipleMeltPeaks |
| qac            | BAL_CASE06 |       |       |      | NoAmplification   |
| qacA           | BAL_CASE06 | 33.23 | 70.51 | 1.68 |                   |
| qacA/qacB      | BAL_CASE06 |       |       |      | NoAmplification   |
| qacEdelta1-0   | BAL_CASE06 |       |       |      | NoAmplification   |
| qacEdelta1-0   | BAL_CASE06 |       |       |      | NoAmplification   |
| qacH-01        | BAL_CASE06 | 34.38 | 86.48 | 1.95 | MultipleMeltPeaks |
| qacH-02        | BAL_CASE06 | 35.89 | 79.02 | 1.82 | MultipleMeltPeaks |
| qnrA           | BAL_CASE06 | 36.04 | 77.15 | 1.94 |                   |



|              |            |       |       |      |                             |
|--------------|------------|-------|-------|------|-----------------------------|
| rarD-02      | BAL_CASE06 | 38.06 | 82.91 | 1.8  |                             |
| sat4         | BAL_CASE06 |       |       |      | NoAmplification             |
| sdeB         | BAL_CASE06 |       |       |      | NoAmplification             |
| spcN-01      | BAL_CASE06 |       |       |      | NoAmplification             |
| speA         | BAL_CASE06 |       |       |      | NoAmplification             |
| str          | BAL_CASE06 |       |       |      | NoAmplification             |
| strA         | BAL_CASE06 |       |       |      | NoAmplification             |
| strB         | BAL_CASE06 | 39.01 | 80.62 | 1.78 |                             |
| sul1         | BAL_CASE06 |       |       |      | NoAmplification             |
| sul2         | BAL_CASE06 |       |       |      | NoAmplification             |
| sulA/foIP-01 | BAL_CASE06 | 24.15 | 80.63 | 1.99 |                             |
| sulA/foIP-03 | BAL_CASE06 | 24.16 | 83.52 | 1.99 |                             |
| tet(32)      | BAL_CASE06 | 23.38 | 81.39 | 1.96 |                             |
| tet(34)      | BAL_CASE06 | 30.97 | 75.59 | 1.94 |                             |
| tet(35)      | BAL_CASE06 |       |       |      | NoAmplification             |
| tet(36)-A    | BAL_CASE06 |       |       |      | NoAmplification             |
| tet(36)-B    | BAL_CASE06 |       |       |      | NoAmplification             |
| tet(37)      | BAL_CASE06 | 31.29 | 76.38 | 1.92 |                             |
| tetA-01      | BAL_CASE06 |       |       |      | NoAmplification             |
| tetA-02      | BAL_CASE06 |       |       |      | NoAmplification             |
| tetB-01      | BAL_CASE06 | 26.81 | 79.65 | 1.91 |                             |
| tetB-02      | BAL_CASE06 | 25.99 | 79.55 | 1.96 |                             |
| tetC-01      | BAL_CASE06 | 25.77 | 75.07 | 1.83 |                             |
| tetC-02      | BAL_CASE06 | 25.85 | 75.93 | 1.94 |                             |
| tetD-01      | BAL_CASE06 |       |       |      | NoAmplification             |
| tetD-02      | BAL_CASE06 |       |       |      | NoAmplification             |
| tetE         | BAL_CASE06 |       |       |      | NoAmplification             |
| tetG-01      | BAL_CASE06 | 36.21 | 80.59 | 2    | MultipleMeltPeaks           |
| tetG-02      | BAL_CASE06 |       |       |      | CurveFitFailed              |
| tetH         | BAL_CASE06 |       |       |      | NoAmplification             |
| tetJ         | BAL_CASE06 |       |       |      | NoAmplification             |
| tetK         | BAL_CASE06 |       |       |      | NoAmplification             |
| tetL-01      | BAL_CASE06 |       |       |      | NoAmplification             |
| tetL-02      | BAL_CASE06 | 34.3  | 78.12 | 1.89 | MultipleMeltPeaks           |
| tetM-01      | BAL_CASE06 | 21.13 | 76.04 | 2    |                             |
| tetM-02      | BAL_CASE06 | 21.55 | 77.61 | 2.06 |                             |
| tetO-01      | BAL_CASE06 | 27.71 | 76.66 | 1.99 |                             |
| tetPA        | BAL_CASE06 |       |       |      | NoAmplification             |
| tetPB-01     | BAL_CASE06 |       |       |      | CurveFitFailed              |
| tetPB-02     | BAL_CASE06 | 32.09 | 84.77 | 2.02 |                             |
| tetPB-03     | BAL_CASE06 |       |       |      | NoAmplification             |
| tetPB-05     | BAL_CASE06 |       |       |      | NoAmplification             |
| tetQ         | BAL_CASE06 | 17.41 | 76.29 | 2.03 |                             |
| tetR-02      | BAL_CASE06 |       |       |      | CurveFitFailed              |
| tetR-03      | BAL_CASE06 | 25.32 | 76.06 | 1.94 |                             |
| tetS         | BAL_CASE06 |       |       |      | LowEfficiency, CurveFitFail |

|             |            |       |       |      |                             |
|-------------|------------|-------|-------|------|-----------------------------|
| tetT        | BAL_CASE06 |       |       |      | NoAmplification             |
| tetU-01     | BAL_CASE06 |       |       |      | NoAmplification             |
| tetV        | BAL_CASE06 |       |       |      | NoAmplification             |
| tetW-01     | BAL_CASE06 | 25.54 | 81.57 | 1.93 |                             |
| tetX        | BAL_CASE06 |       |       |      | NoAmplification             |
| tnpA-01     | BAL_CASE06 | 30.85 | 83.55 | 1.92 |                             |
| tnpA-02     | BAL_CASE06 |       |       |      | NoAmplification             |
| tnpA-03     | BAL_CASE06 | 26.41 | 78.35 | 2.02 |                             |
| tnpA-04     | BAL_CASE06 | 29.25 | 82.25 | 1.74 |                             |
| tnpA-05     | BAL_CASE06 |       |       |      | NoAmplification             |
| tnpA-07     | BAL_CASE06 |       |       |      | NoAmplification             |
| tolC-01     | BAL_CASE06 |       |       |      | NoAmplification             |
| tolC-02     | BAL_CASE06 | 31.63 | 88.06 | 1.95 |                             |
| tolC-03     | BAL_CASE06 | 30.06 | 85.65 | 1.96 | MultipleMeltPeaks           |
| Tp614       | BAL_CASE06 |       |       |      | NoAmplification             |
| ttgA        | BAL_CASE06 |       |       |      | NoAmplification             |
| ttgB        | BAL_CASE06 | 43.27 | 81.15 | 1.71 | MultipleMeltPeaks           |
| vanA        | BAL_CASE06 |       |       |      | NoAmplification             |
| vanB-01     | BAL_CASE06 | 29.6  | 73.63 | 1.73 |                             |
| vanC-01     | BAL_CASE06 |       |       |      | NoAmplification             |
| vanC-02     | BAL_CASE06 |       |       |      | NoAmplification             |
| vanC-03     | BAL_CASE06 | 33.15 | 82.26 | 1.81 | MultipleMeltPeaks           |
| vanC1       | BAL_CASE06 |       |       |      | NoAmplification             |
| vanC2/vanC3 | BAL_CASE06 |       |       |      | LowEfficiency, CurveFitFail |
| vanG        | BAL_CASE06 |       |       |      | NoAmplification             |
| vanHB       | BAL_CASE06 |       |       |      | CurveFitFailed              |
| vanHD       | BAL_CASE06 |       |       |      | NoAmplification             |
| vanRA-01    | BAL_CASE06 |       |       |      | NoAmplification             |
| vanRA-02    | BAL_CASE06 |       |       |      | NoAmplification             |
| vanRB       | BAL_CASE06 | 32.81 | 85.61 | 1.75 |                             |
| vanRC       | BAL_CASE06 |       |       |      | NoAmplification             |
| vanRC4      | BAL_CASE06 |       |       |      | NoAmplification             |
| vanRD       | BAL_CASE06 |       |       |      | NoAmplification             |
| vanSA       | BAL_CASE06 |       |       |      | NoAmplification             |
| vanSB       | BAL_CASE06 |       |       |      | NoAmplification             |
| vanSC-01    | BAL_CASE06 |       |       |      | NoAmplification             |
| vanSC-02    | BAL_CASE06 |       |       |      | NoAmplification             |
| vanTC-01    | BAL_CASE06 |       |       |      | NoAmplification             |
| vanTC-02    | BAL_CASE06 |       |       |      | NoAmplification             |
| vanTE       | BAL_CASE06 |       |       |      | NoAmplification             |
| vanTG       | BAL_CASE06 |       |       |      | NoAmplification             |
| vanWB       | BAL_CASE06 |       |       |      | NoAmplification             |
| vanWG       | BAL_CASE06 | 37.33 | 73.88 | 1.91 |                             |
| vanXA       | BAL_CASE06 |       |       |      | NoAmplification             |
| vanXB       | BAL_CASE06 |       |       |      | NoAmplification             |
| vanXD       | BAL_CASE06 | 33.39 | 74.64 | 1.91 |                             |

|              |            |       |       |                 |
|--------------|------------|-------|-------|-----------------|
| vanYB        | BAL_CASE06 |       |       | NoAmplification |
| vanYD-01     | BAL_CASE06 | 35.03 | 83.04 | 1.88            |
| vanYD-02     | BAL_CASE06 |       |       | NoAmplification |
| vatB-01      | BAL_CASE06 |       |       | NoAmplification |
| vatB-02      | BAL_CASE06 | 35.62 | 80.9  | 1.88            |
| vatC-01      | BAL_CASE06 |       |       | NoAmplification |
| vatC-02      | BAL_CASE06 | 32.94 | 86.36 | 1.88            |
| vatE-01      | BAL_CASE06 | 28.56 | 77.14 | 2.06            |
| vatE-02      | BAL_CASE06 |       |       | NoAmplification |
| vgaA-01      | BAL_CASE06 |       |       | NoAmplification |
| vgaA-02      | BAL_CASE06 |       |       | NoAmplification |
| vgb-01       | BAL_CASE06 | 34.39 | 78.84 | 1.95            |
| vgbB-01      | BAL_CASE06 |       |       | NoAmplification |
| vgbB-02      | BAL_CASE06 |       |       | NoAmplification |
| yceE/mdtG-0  | BAL_CASE06 |       |       | NoAmplification |
| yceE/mdtG-0  | BAL_CASE06 |       |       | NoAmplification |
| yceL/mdtH-0  | BAL_CASE06 | 32.65 | 75.94 | 1.86            |
| yceL/mdtH-0  | BAL_CASE06 |       |       | NoAmplification |
| yceL/mdtH-0  | BAL_CASE06 |       |       | NoAmplification |
| yidY/mdtL-01 | BAL_CASE06 | 30.66 | 88.68 | 1.93            |
| yidY/mdtL-02 | BAL_CASE06 | 34.83 | 75.4  | 1.97            |

| Assay          | Sample     | Ct    | Tm    | Efficiency | Flags             |
|----------------|------------|-------|-------|------------|-------------------|
| 16S rRNA       | BAL_CASE07 |       | 20.76 | 82.08      | 1.93              |
| aac            | BAL_CASE07 |       |       |            | NoAmplification   |
| aac(6')-Ib(akz | BAL_CASE07 |       |       |            | NoAmplification   |
| aac(6')-Ib(akz | BAL_CASE07 |       |       |            | NoAmplification   |
| aac(6')-Ib(akz | BAL_CASE07 |       |       |            | NoAmplification   |
| aac(6')-II     | BAL_CASE07 |       |       |            | NoAmplification   |
| aac(6')I1      | BAL_CASE07 |       |       |            | NoAmplification   |
| aacA/aphD      | BAL_CASE07 |       |       |            | NoAmplification   |
| aacC           | BAL_CASE07 |       |       |            | CurveFitFailed    |
| aacC1          | BAL_CASE07 |       |       |            | NoAmplification   |
| aacC2          | BAL_CASE07 |       |       |            | NoAmplification   |
| aacC4          | BAL_CASE07 |       |       |            | NoAmplification   |
| aadA-01        | BAL_CASE07 |       |       |            | NoAmplification   |
| aadA-02        | BAL_CASE07 |       |       |            | NoAmplification   |
| aadA-1-01      | BAL_CASE07 |       |       |            | NoAmplification   |
| aadA-1-02      | BAL_CASE07 |       |       |            | NoAmplification   |
| aadA1          | BAL_CASE07 | 34.76 | 75.71 | 2.02       |                   |
| aadA2-01       | BAL_CASE07 |       |       |            | NoAmplification   |
| aadA2-02       | BAL_CASE07 | 32.14 | 75.39 | 1.87       |                   |
| aadA2-03       | BAL_CASE07 |       |       |            | NoAmplification   |
| aadA5-01       | BAL_CASE07 |       |       |            | NoAmplification   |
| aadA5-02       | BAL_CASE07 | 36.23 | 83.83 | 1.85       |                   |
| aadA9-01       | BAL_CASE07 |       |       |            | NoAmplification   |
| aadA9-02       | BAL_CASE07 |       |       |            | NoAmplification   |
| aadD           | BAL_CASE07 |       |       |            | NoAmplification   |
| aadE           | BAL_CASE07 |       |       |            | NoAmplification   |
| acrA-01        | BAL_CASE07 | 36.17 | 82.28 | 1.85       | MultipleMeltPeaks |
| acrA-02        | BAL_CASE07 |       |       |            | NoAmplification   |
| acrA-03        | BAL_CASE07 |       |       |            | NoAmplification   |
| acrA-04        | BAL_CASE07 | 33.61 | 80.5  | 1.99       |                   |
| acrA-05        | BAL_CASE07 | 31    | 80.07 | 1.95       |                   |
| acrB-01        | BAL_CASE07 |       |       |            | NoAmplification   |
| acrF           | BAL_CASE07 | 37.75 | 82.44 | 1.83       | MultipleMeltPeaks |
| acrR-01        | BAL_CASE07 |       |       |            | NoAmplification   |
| acrR-02        | BAL_CASE07 | 34.33 | 75.54 | 1.96       |                   |
| Actin          | BAL_CASE07 | 23.13 | 87.29 | 1.92       | MultipleMeltPeaks |
| adeA           | BAL_CASE07 | 33.8  | 79.51 | 1.9        |                   |
| ampC-01        | BAL_CASE07 | 35.34 | 84.75 | 1.88       |                   |
| ampC-02        | BAL_CASE07 | 37.53 | 87.28 | 1.87       |                   |
| ampC-04        | BAL_CASE07 | 35.91 | 77.37 | 1.8        | MultipleMeltPeaks |
| ampC-05        | BAL_CASE07 |       |       |            | NoAmplification   |
| ampC-06        | BAL_CASE07 | 37.73 | 80.85 | 1.79       |                   |
| ampC-07        | BAL_CASE07 |       |       |            | NoAmplification   |
| ampC-09        | BAL_CASE07 |       |       |            | NoAmplification   |
| ampC/blaDH     | BAL_CASE07 | 40.7  | 85.38 | 1.7        | MultipleMeltPeaks |

|                          |            |       |       |      |                   |
|--------------------------|------------|-------|-------|------|-------------------|
| aph                      | BAL_CASE07 |       |       |      | NoAmplification   |
| aph(2')-Id-01            | BAL_CASE07 |       |       |      | NoAmplification   |
| aph(2')-Id-02            | BAL_CASE07 |       |       |      | NoAmplification   |
| aph6ia                   | BAL_CASE07 | 33.32 | 77.86 | 1.97 | MultipleMeltPeaks |
| aphA1(aka k <sub>z</sub> | BAL_CASE07 |       |       |      | NoAmplification   |
| bacA-01                  | BAL_CASE07 |       |       |      | NoAmplification   |
| bacA-02                  | BAL_CASE07 |       |       |      | NoAmplification   |
| BETA-globin              | BAL_CASE07 | 22.86 | 84.35 | 1.93 |                   |
| bla-ACC-1                | BAL_CASE07 |       |       |      | NoAmplification   |
| bla-L1                   | BAL_CASE07 |       |       |      | CurveFitFailed    |
| bla1                     | BAL_CASE07 |       |       |      | NoAmplification   |
| blaCMY                   | BAL_CASE07 |       |       |      | NoAmplification   |
| blaCMY2-01               | BAL_CASE07 | 35.78 | 75.12 | 1.96 |                   |
| blaCMY2-02               | BAL_CASE07 | 31.08 | 83.39 | 1.98 |                   |
| blaCTX-M-01              | BAL_CASE07 |       |       |      | NoAmplification   |
| blaCTX-M-02              | BAL_CASE07 |       |       |      | NoAmplification   |
| blaCTX-M-03              | BAL_CASE07 |       |       |      | NoAmplification   |
| blaCTX-M-04              | BAL_CASE07 |       |       |      | NoAmplification   |
| blaCTX-M-05              | BAL_CASE07 | 31.48 | 76.51 | 1.88 |                   |
| blaCTX-M-06              | BAL_CASE07 |       |       |      | NoAmplification   |
| blaGES                   | BAL_CASE07 |       |       |      | NoAmplification   |
| blaIMP-01                | BAL_CASE07 |       |       |      | NoAmplification   |
| blaIMP-02                | BAL_CASE07 |       |       |      | NoAmplification   |
| blaMOX/blaC              | BAL_CASE07 |       |       |      | NoAmplification   |
| blaOCH                   | BAL_CASE07 |       |       |      | NoAmplification   |
| blaOKP                   | BAL_CASE07 |       |       |      | NoAmplification   |
| blaOXA1/blaC             | BAL_CASE07 |       |       |      | NoAmplification   |
| blaOXA10-01              | BAL_CASE07 |       |       |      | NoAmplification   |
| blaOXA10-02              | BAL_CASE07 |       |       |      | NoAmplification   |
| blaOXY                   | BAL_CASE07 |       |       |      | NoAmplification   |
| blaPAO                   | BAL_CASE07 |       |       |      | NoAmplification   |
| blaPER                   | BAL_CASE07 |       |       |      | NoAmplification   |
| blaPSE                   | BAL_CASE07 |       |       |      | NoAmplification   |
| blaROB                   | BAL_CASE07 |       |       |      | NoAmplification   |
| blaSFO                   | BAL_CASE07 | 34.8  | 84.61 | 1.89 | MultipleMeltPeaks |
| blaSHV-01                | BAL_CASE07 |       |       |      | NoAmplification   |
| blaSHV-02                | BAL_CASE07 |       |       |      | NoAmplification   |
| blaTEM                   | BAL_CASE07 | 28.8  | 79.23 | 1.97 |                   |
| blaTLA                   | BAL_CASE07 |       |       |      | NoAmplification   |
| blaVEB                   | BAL_CASE07 |       |       |      | NoAmplification   |
| blaVIM                   | BAL_CASE07 |       |       |      | NoAmplification   |
| blaZ                     | BAL_CASE07 |       |       |      | NoAmplification   |
| carB                     | BAL_CASE07 |       |       |      | NoAmplification   |
| catA1                    | BAL_CASE07 |       |       |      | NoAmplification   |
| catB3                    | BAL_CASE07 |       |       |      | NoAmplification   |
| catB8                    | BAL_CASE07 | 35.11 | 81.19 | 1.87 |                   |

|            |            |       |       |      |                             |
|------------|------------|-------|-------|------|-----------------------------|
| ceoA       | BAL_CASE07 | 35.07 | 82.68 | 1.88 |                             |
| cepA       | BAL_CASE07 |       |       |      | NoAmplification             |
| cfiA       | BAL_CASE07 |       |       |      | NoAmplification             |
| cfr        | BAL_CASE07 |       |       |      | NoAmplification             |
| cfxA       | BAL_CASE07 | 20.11 | 77.59 | 1.76 |                             |
| cmeA       | BAL_CASE07 |       |       |      | NoAmplification             |
| cmlA1-01   | BAL_CASE07 |       |       |      | NoAmplification             |
| cmlA1-02   | BAL_CASE07 |       |       |      | NoAmplification             |
| cmr        | BAL_CASE07 |       |       |      | NoAmplification             |
| cmx(A)     | BAL_CASE07 | 32.43 | 86.98 | 1.95 | MultipleMeltPeaks           |
| cphA-01    | BAL_CASE07 | 34.3  | 85.69 | 1.95 |                             |
| cphA-02    | BAL_CASE07 |       |       |      | NoAmplification             |
| dfrA1      | BAL_CASE07 |       |       |      | NoAmplification             |
| dfrA12     | BAL_CASE07 |       |       |      | NoAmplification             |
| emrD       | BAL_CASE07 |       |       |      | NoAmplification             |
| ereA       | BAL_CASE07 |       |       |      | NoAmplification             |
| ereB       | BAL_CASE07 | 32.84 | 80.39 | 2.05 |                             |
| erm(34)    | BAL_CASE07 |       |       |      | NoAmplification             |
| erm(35)    | BAL_CASE07 |       |       |      | NoAmplification             |
| erm(36)    | BAL_CASE07 |       |       |      | NoAmplification             |
| ermA       | BAL_CASE07 |       |       |      | NoAmplification             |
| ermA/ermTR | BAL_CASE07 |       |       |      | NoAmplification             |
| ermB       | BAL_CASE07 |       |       |      | NoAmplification             |
| ermC       | BAL_CASE07 |       |       |      | NoAmplification             |
| ermF       | BAL_CASE07 |       |       |      | NoAmplification             |
| ermJ/ermD  | BAL_CASE07 |       |       |      | NoAmplification             |
| ermK-01    | BAL_CASE07 |       |       |      | NoAmplification             |
| ermK-02    | BAL_CASE07 |       |       |      | NoAmplification             |
| ermT-01    | BAL_CASE07 |       |       |      | NoAmplification             |
| ermT-02    | BAL_CASE07 |       |       |      | NoAmplification             |
| ermX       | BAL_CASE07 |       |       |      | NoAmplification             |
| ermY       | BAL_CASE07 |       |       |      | NoAmplification             |
| fabK       | BAL_CASE07 | 30.31 | 79.49 | 2.04 |                             |
| floR       | BAL_CASE07 |       |       |      | NoAmplification             |
| folA       | BAL_CASE07 |       |       |      | NoAmplification             |
| fosB       | BAL_CASE07 |       |       |      | LowEfficiency, CtlSmall, S: |
| fosX       | BAL_CASE07 |       |       |      | NoAmplification             |
| fox5       | BAL_CASE07 | 30.08 | 86.24 | 1.84 |                             |
| imiR       | BAL_CASE07 |       |       |      | NoAmplification             |
| ImrA-01    | BAL_CASE07 |       |       |      | NoAmplification             |
| intl       | BAL_CASE07 | 34.37 | 84.71 | 1.9  |                             |
| intl1      | BAL_CASE07 | 22.82 | 87.17 | 1.97 | MultipleMeltPeaks           |
| IS613      | BAL_CASE07 | 23.23 | 79.66 | 1.73 |                             |
| lnuA-01    | BAL_CASE07 | 32.69 | 73.55 | 2    |                             |
| lnuB-01    | BAL_CASE07 |       |       |      | NoAmplification             |
| lnuB-02    | BAL_CASE07 |       |       |      | NoAmplification             |

|                |            |       |       |      |                   |
|----------------|------------|-------|-------|------|-------------------|
| lnuC           | BAL_CASE07 |       |       |      | CurveFitFailed    |
| marR-01        | BAL_CASE07 |       |       |      | CurveFitFailed    |
| matA/mel       | BAL_CASE07 | 25.66 | 77.66 | 2.03 |                   |
| mdet1          | BAL_CASE07 |       |       |      | NoAmplification   |
| mdtA           | BAL_CASE07 |       |       |      | CurveFitFailed    |
| mdtE/yhiU      | BAL_CASE07 |       |       |      | NoAmplification   |
| mecA           | BAL_CASE07 |       |       |      | NoAmplification   |
| mefA           | BAL_CASE07 | 25.45 | 80.7  | 1.97 |                   |
| mepA           | BAL_CASE07 |       |       |      | NoAmplification   |
| mexA           | BAL_CASE07 |       |       |      | NoAmplification   |
| mexD           | BAL_CASE07 |       |       |      | CurveFitFailed    |
| mexE           | BAL_CASE07 |       |       |      | NoAmplification   |
| mexF           | BAL_CASE07 | 31.93 | 81.13 | 1.92 | MultipleMeltPeaks |
| mphA-01        | BAL_CASE07 | 30.69 | 86.92 | 1.96 | MultipleMeltPeaks |
| mphA-02        | BAL_CASE07 | 31.07 | 77.49 | 1.83 |                   |
| mphB           | BAL_CASE07 |       |       |      | NoAmplification   |
| mphC           | BAL_CASE07 |       |       |      | NoAmplification   |
| msrA-01        | BAL_CASE07 |       |       |      | NoAmplification   |
| msrC-01        | BAL_CASE07 |       |       |      | NoAmplification   |
| mtrC-01        | BAL_CASE07 |       |       |      | NoAmplification   |
| mtrC-02        | BAL_CASE07 | 37.39 | 84.29 | 1.79 |                   |
| mtrD-02        | BAL_CASE07 | 29.33 | 81.33 | 1.95 |                   |
| mtrD-03        | BAL_CASE07 |       |       |      | NoAmplification   |
| NDM1           | BAL_CASE07 |       |       |      | NoAmplification   |
| nimE           | BAL_CASE07 |       |       |      | CurveFitFailed    |
| nisB           | BAL_CASE07 |       |       |      | NoAmplification   |
| oleC           | BAL_CASE07 |       |       |      | NoAmplification   |
| oprD           | BAL_CASE07 | 32.29 | 85.86 | 1.94 |                   |
| oprJ           | BAL_CASE07 | 33.77 | 81.4  | 1.93 |                   |
| pbp            | BAL_CASE07 |       |       |      | NoAmplification   |
| pbp2x          | BAL_CASE07 | 29.32 | 75.74 | 1.9  |                   |
| Pbp5           | BAL_CASE07 |       |       |      | NoAmplification   |
| penA           | BAL_CASE07 |       |       |      | NoAmplification   |
| pikR1          | BAL_CASE07 |       |       |      | NoAmplification   |
| pikR2          | BAL_CASE07 | 34    | 84.61 | 1.88 |                   |
| pmrA           | BAL_CASE07 | 28.67 | 79.14 | 2.05 |                   |
| pncA           | BAL_CASE07 |       |       |      | NoAmplification   |
| putative multi | BAL_CASE07 |       |       |      | NoAmplification   |
| qac            | BAL_CASE07 |       |       |      | NoAmplification   |
| qacA           | BAL_CASE07 |       |       |      | NoAmplification   |
| qacA/qacB      | BAL_CASE07 |       |       |      | NoAmplification   |
| qacEdelta1-0   | BAL_CASE07 |       |       |      | NoAmplification   |
| qacEdelta1-0   | BAL_CASE07 | 29.65 | 76.79 | 1.95 |                   |
| qacH-01        | BAL_CASE07 |       |       |      | NoAmplification   |
| qacH-02        | BAL_CASE07 |       |       |      | NoAmplification   |
| qnrA           | BAL_CASE07 |       |       |      | NoAmplification   |

|              |            |       |       |      |                             |
|--------------|------------|-------|-------|------|-----------------------------|
| rarD-02      | BAL_CASE07 |       |       |      | NoAmplification             |
| sat4         | BAL_CASE07 |       |       |      | NoAmplification             |
| sdeB         | BAL_CASE07 |       |       |      | NoAmplification             |
| spcN-01      | BAL_CASE07 |       |       |      | CurveFitFailed              |
| speA         | BAL_CASE07 |       |       |      | NoAmplification             |
| str          | BAL_CASE07 |       |       |      | NoAmplification             |
| strA         | BAL_CASE07 |       |       |      | NoAmplification             |
| strB         | BAL_CASE07 |       |       |      | NoAmplification             |
| sul1         | BAL_CASE07 |       |       |      | NoAmplification             |
| sul2         | BAL_CASE07 |       |       |      | NoAmplification             |
| sulA/foIP-01 | BAL_CASE07 |       |       |      | NoAmplification             |
| sulA/foIP-03 | BAL_CASE07 | 26.28 | 83.59 | 1.95 |                             |
| tet(32)      | BAL_CASE07 |       |       |      | NoAmplification             |
| tet(34)      | BAL_CASE07 | 30.01 | 75.78 | 1.98 |                             |
| tet(35)      | BAL_CASE07 |       |       |      | NoAmplification             |
| tet(36)-A    | BAL_CASE07 |       |       |      | NoAmplification             |
| tet(36)-B    | BAL_CASE07 |       |       |      | NoAmplification             |
| tet(37)      | BAL_CASE07 | 22.8  | 76.64 | 1.97 |                             |
| tetA-01      | BAL_CASE07 | 34.35 | 85.1  | 1.95 |                             |
| tetA-02      | BAL_CASE07 |       |       |      | NoAmplification             |
| tetB-01      | BAL_CASE07 |       |       |      | NoAmplification             |
| tetB-02      | BAL_CASE07 |       |       |      | NoAmplification             |
| tetC-01      | BAL_CASE07 |       |       |      | NoAmplification             |
| tetC-02      | BAL_CASE07 |       |       |      | NoAmplification             |
| tetD-01      | BAL_CASE07 |       |       |      | NoAmplification             |
| tetD-02      | BAL_CASE07 | 30.72 | 77.81 | 1.93 |                             |
| tetE         | BAL_CASE07 |       |       |      | NoAmplification             |
| tetG-01      | BAL_CASE07 | 39.75 | 82.65 | 1.69 | MultipleMeltPeaks           |
| tetG-02      | BAL_CASE07 |       |       |      | NoAmplification             |
| tetH         | BAL_CASE07 |       |       |      | NoAmplification             |
| tetJ         | BAL_CASE07 |       |       |      | NoAmplification             |
| tetK         | BAL_CASE07 | 28.91 | 72.43 | 2.06 |                             |
| tetL-01      | BAL_CASE07 |       |       |      | NoAmplification             |
| tetL-02      | BAL_CASE07 |       |       |      | NoAmplification             |
| tetM-01      | BAL_CASE07 | 29.92 | 75.95 | 1.99 |                             |
| tetM-02      | BAL_CASE07 |       |       |      | NoAmplification             |
| tetO-01      | BAL_CASE07 | 26.99 | 76.72 | 1.98 |                             |
| tetPA        | BAL_CASE07 |       |       |      | NoAmplification             |
| tetPB-01     | BAL_CASE07 |       |       |      | NoAmplification             |
| tetPB-02     | BAL_CASE07 |       |       |      | NoAmplification             |
| tetPB-03     | BAL_CASE07 |       |       |      | NoAmplification             |
| tetPB-05     | BAL_CASE07 |       |       |      | NoAmplification             |
| tetQ         | BAL_CASE07 |       |       |      | NoAmplification             |
| tetR-02      | BAL_CASE07 |       |       |      | NoAmplification             |
| tetR-03      | BAL_CASE07 |       |       |      | NoAmplification             |
| tetS         | BAL_CASE07 |       |       |      | BadR2, CurveFitFailed, High |



|             |            |       |       |      |                   |
|-------------|------------|-------|-------|------|-------------------|
| tetT        | BAL_CASE07 | 30.2  | 73.54 | 2.09 |                   |
| tetU-01     | BAL_CASE07 |       |       |      | NoAmplification   |
| tetV        | BAL_CASE07 |       |       |      | NoAmplification   |
| tetW-01     | BAL_CASE07 |       |       |      | NoAmplification   |
| tetX        | BAL_CASE07 |       |       |      | NoAmplification   |
| tnpA-01     | BAL_CASE07 |       |       |      | NoAmplification   |
| tnpA-02     | BAL_CASE07 |       |       |      | NoAmplification   |
| tnpA-03     | BAL_CASE07 | 34.96 | 74.53 | 2.07 |                   |
| tnpA-04     | BAL_CASE07 |       |       |      | NoAmplification   |
| tnpA-05     | BAL_CASE07 |       |       |      | NoAmplification   |
| tnpA-07     | BAL_CASE07 |       |       |      | NoAmplification   |
| tolC-01     | BAL_CASE07 |       |       |      | NoAmplification   |
| tolC-02     | BAL_CASE07 | 28.77 | 85.71 | 1.91 | MultipleMeltPeaks |
| tolC-03     | BAL_CASE07 | 35.33 | 85.86 | 1.85 |                   |
| Tp614       | BAL_CASE07 | 40.14 | 82.1  | 1.76 |                   |
| ttgA        | BAL_CASE07 |       |       |      | NoAmplification   |
| ttgB        | BAL_CASE07 | 38.37 | 76.83 | 1.83 | MultipleMeltPeaks |
| vanA        | BAL_CASE07 |       |       |      | NoAmplification   |
| vanB-01     | BAL_CASE07 | 28.63 | 73.99 | 1.82 |                   |
| vanC-01     | BAL_CASE07 |       |       |      | NoAmplification   |
| vanC-02     | BAL_CASE07 |       |       |      | NoAmplification   |
| vanC-03     | BAL_CASE07 |       |       |      | NoAmplification   |
| vanC1       | BAL_CASE07 |       |       |      | NoAmplification   |
| vanC2/vanC3 | BAL_CASE07 |       |       |      | NoAmplification   |
| vanG        | BAL_CASE07 |       |       |      | NoAmplification   |
| vanHB       | BAL_CASE07 |       |       |      | NoAmplification   |
| vanHD       | BAL_CASE07 |       |       |      | CurveFitFailed    |
| vanRA-01    | BAL_CASE07 |       |       |      | NoAmplification   |
| vanRA-02    | BAL_CASE07 |       |       |      | NoAmplification   |
| vanRB       | BAL_CASE07 | 32.57 | 85.6  | 1.79 |                   |
| vanRC       | BAL_CASE07 |       |       |      | NoAmplification   |
| vanRC4      | BAL_CASE07 |       |       |      | NoAmplification   |
| vanRD       | BAL_CASE07 |       |       |      | NoAmplification   |
| vanSA       | BAL_CASE07 |       |       |      | NoAmplification   |
| vanSB       | BAL_CASE07 |       |       |      | NoAmplification   |
| vanSC-01    | BAL_CASE07 |       |       |      | NoAmplification   |
| vanSC-02    | BAL_CASE07 |       |       |      | NoAmplification   |
| vanTC-01    | BAL_CASE07 |       |       |      | NoAmplification   |
| vanTC-02    | BAL_CASE07 |       |       |      | NoAmplification   |
| vanTE       | BAL_CASE07 |       |       |      | NoAmplification   |
| vanTG       | BAL_CASE07 |       |       |      | NoAmplification   |
| vanWB       | BAL_CASE07 |       |       |      | NoAmplification   |
| vanWG       | BAL_CASE07 |       |       |      | NoAmplification   |
| vanXA       | BAL_CASE07 |       |       |      | NoAmplification   |
| vanXB       | BAL_CASE07 |       |       |      | NoAmplification   |
| vanXD       | BAL_CASE07 | 31.8  | 74.89 | 1.87 |                   |

|              |            |       |       |      |                             |
|--------------|------------|-------|-------|------|-----------------------------|
| vanYB        | BAL_CASE07 |       |       |      | NoAmplification             |
| vanYD-01     | BAL_CASE07 |       |       |      | LowEfficiency, SaturationB: |
| vanYD-02     | BAL_CASE07 |       |       |      | NoAmplification             |
| vatB-01      | BAL_CASE07 |       |       |      | NoAmplification             |
| vatB-02      | BAL_CASE07 |       |       |      | NoAmplification             |
| vatC-01      | BAL_CASE07 |       |       |      | NoAmplification             |
| vatC-02      | BAL_CASE07 |       |       |      | CurveFitFailed              |
| vatE-01      | BAL_CASE07 | 28.46 | 76.51 | 2.09 |                             |
| vatE-02      | BAL_CASE07 |       |       |      | NoAmplification             |
| vgaA-01      | BAL_CASE07 |       |       |      | NoAmplification             |
| vgaA-02      | BAL_CASE07 |       |       |      | NoAmplification             |
| vgb-01       | BAL_CASE07 |       |       |      | NoAmplification             |
| vgbB-01      | BAL_CASE07 |       |       |      | NoAmplification             |
| vgbB-02      | BAL_CASE07 |       |       |      | NoAmplification             |
| yceE/mdtG-0  | BAL_CASE07 |       |       |      | NoAmplification             |
| yceE/mdtG-0  | BAL_CASE07 |       |       |      | NoAmplification             |
| yceL/mdtH-0  | BAL_CASE07 |       |       |      | CurveFitFailed              |
| yceL/mdtH-0  | BAL_CASE07 |       |       |      | NoAmplification             |
| yceL/mdtH-0  | BAL_CASE07 |       |       |      | NoAmplification             |
| yidY/mdtL-01 | BAL_CASE07 | 34.54 | 85.52 | 1.94 |                             |
| yidY/mdtL-02 | BAL_CASE07 |       |       |      | NoAmplification             |

| Assay          | Sample     | Ct    | Tm    | Efficiency | Flags                  |
|----------------|------------|-------|-------|------------|------------------------|
| 16S rRNA       | BAL_CASE08 |       | 18.6  | 81.32      | 1.93                   |
| aac            | BAL_CASE08 |       | 33.64 | 78.44      | 1.49 MultipleMeltPeaks |
| aac(6')-Ib(akz | BAL_CASE08 |       |       |            | NoAmplification        |
| aac(6')-Ib(akz | BAL_CASE08 | 33.01 | 83.97 | 1.88       | MultipleMeltPeaks      |
| aac(6')-Ib(akz | BAL_CASE08 |       |       |            | CurveFitFailed         |
| aac(6')-II     | BAL_CASE08 |       |       |            | NoAmplification        |
| aac(6')I1      | BAL_CASE08 |       |       |            | NoAmplification        |
| aacA/aphD      | BAL_CASE08 |       |       |            | NoAmplification        |
| aacC           | BAL_CASE08 | 36.41 | 86.62 | 1.8        | MultipleMeltPeaks      |
| aacC1          | BAL_CASE08 |       |       |            | NoAmplification        |
| aacC2          | BAL_CASE08 |       |       |            | NoAmplification        |
| aacC4          | BAL_CASE08 | 36.07 | 83.41 | 1.83       | MultipleMeltPeaks      |
| aadA-01        | BAL_CASE08 |       |       |            | NoAmplification        |
| aadA-02        | BAL_CASE08 |       |       |            | CurveFitFailed         |
| aadA-1-01      | BAL_CASE08 |       |       |            | NoAmplification        |
| aadA-1-02      | BAL_CASE08 |       |       |            | NoAmplification        |
| aadA1          | BAL_CASE08 | 36.11 | 78.9  | 1.93       |                        |
| aadA2-01       | BAL_CASE08 |       |       |            | NoAmplification        |
| aadA2-02       | BAL_CASE08 | 35.11 | 75.03 | 2.01       |                        |
| aadA2-03       | BAL_CASE08 |       |       |            | NoAmplification        |
| aadA5-01       | BAL_CASE08 |       |       |            | NoAmplification        |
| aadA5-02       | BAL_CASE08 | 34.73 | 78.01 | 1.97       | MultipleMeltPeaks      |
| aadA9-01       | BAL_CASE08 |       |       |            | NoAmplification        |
| aadA9-02       | BAL_CASE08 | 36    | 79.2  | 1.92       |                        |
| aadD           | BAL_CASE08 |       |       |            | NoAmplification        |
| aadE           | BAL_CASE08 |       |       |            | NoAmplification        |
| acrA-01        | BAL_CASE08 | 33.54 | 88.8  | 1.91       |                        |
| acrA-02        | BAL_CASE08 |       |       |            | NoAmplification        |
| acrA-03        | BAL_CASE08 | 33.35 | 78.11 | 1.96       |                        |
| acrA-04        | BAL_CASE08 | 31.79 | 80.53 | 1.98       |                        |
| acrA-05        | BAL_CASE08 | 33.17 | 85.57 | 1.97       |                        |
| acrB-01        | BAL_CASE08 |       |       |            | NoAmplification        |
| acrF           | BAL_CASE08 | 35.89 | 84.9  | 1.9        |                        |
| acrR-01        | BAL_CASE08 | 38.21 | 78.64 | 1.77       |                        |
| acrR-02        | BAL_CASE08 |       |       |            | NoAmplification        |
| Actin          | BAL_CASE08 | 20.98 | 87.07 | 1.94       | MultipleMeltPeaks      |
| adeA           | BAL_CASE08 | 38.22 | 84.46 | 1.75       |                        |
| ampC-01        | BAL_CASE08 | 34.27 | 78.75 | 2          | MultipleMeltPeaks      |
| ampC-02        | BAL_CASE08 |       |       |            | NoAmplification        |
| ampC-04        | BAL_CASE08 | 32.17 | 78.67 | 1.81       |                        |
| ampC-05        | BAL_CASE08 |       |       |            | NoAmplification        |
| ampC-06        | BAL_CASE08 | 31.26 | 72.79 | 1.75       | MultipleMeltPeaks      |
| ampC-07        | BAL_CASE08 | 34.95 | 88.28 | 1.83       | MultipleMeltPeaks      |
| ampC-09        | BAL_CASE08 |       |       |            | NoAmplification        |
| ampC/blaDH     | BAL_CASE08 | 34.73 | 77.06 | 1.95       | MultipleMeltPeaks      |

|                          |            |       |       |      |                   |
|--------------------------|------------|-------|-------|------|-------------------|
| aph                      | BAL_CASE08 |       |       |      | NoAmplification   |
| aph(2')-Id-01            | BAL_CASE08 |       |       |      | NoAmplification   |
| aph(2')-Id-02            | BAL_CASE08 |       |       |      | NoAmplification   |
| aph6ia                   | BAL_CASE08 | 35.81 | 76.67 | 1.88 |                   |
| aphA1(aka k <sub>z</sub> | BAL_CASE08 |       |       |      | NoAmplification   |
| bacA-01                  | BAL_CASE08 |       |       |      | NoAmplification   |
| bacA-02                  | BAL_CASE08 | 36.47 | 75.59 | 1.85 |                   |
| BETA-globin              | BAL_CASE08 | 21.79 | 84.33 | 1.94 |                   |
| bla-ACC-1                | BAL_CASE08 |       |       |      | NoAmplification   |
| bla-L1                   | BAL_CASE08 | 31.03 | 81.11 | 1.9  |                   |
| bla1                     | BAL_CASE08 |       |       |      | NoAmplification   |
| blaCMY                   | BAL_CASE08 |       |       |      | NoAmplification   |
| blaCMY2-01               | BAL_CASE08 |       |       |      | NoAmplification   |
| blaCMY2-02               | BAL_CASE08 | 29.3  | 85.46 | 1.93 |                   |
| blaCTX-M-01              | BAL_CASE08 | 38.53 | 62.96 | 1.72 | MultipleMeltPeaks |
| blaCTX-M-02              | BAL_CASE08 | 39.2  | 80    | 1.64 | MultipleMeltPeaks |
| blaCTX-M-03              | BAL_CASE08 |       |       |      | NoAmplification   |
| blaCTX-M-04              | BAL_CASE08 |       |       |      | NoAmplification   |
| blaCTX-M-05              | BAL_CASE08 | 32.87 | 76.75 | 1.83 |                   |
| blaCTX-M-06              | BAL_CASE08 |       |       |      | NoAmplification   |
| blaGES                   | BAL_CASE08 |       |       |      | NoAmplification   |
| blaIMP-01                | BAL_CASE08 |       |       |      | NoAmplification   |
| blaIMP-02                | BAL_CASE08 |       |       |      | NoAmplification   |
| blaMOX/blaC              | BAL_CASE08 |       |       |      | NoAmplification   |
| blaOCH                   | BAL_CASE08 |       |       |      | NoAmplification   |
| blaOKP                   | BAL_CASE08 |       |       |      | NoAmplification   |
| blaOXA1/blaC             | BAL_CASE08 |       |       |      | NoAmplification   |
| blaOXA10-01              | BAL_CASE08 |       |       |      | NoAmplification   |
| blaOXA10-02              | BAL_CASE08 |       |       |      | NoAmplification   |
| blaOXY                   | BAL_CASE08 |       |       |      | NoAmplification   |
| blaPAO                   | BAL_CASE08 |       |       |      | NoAmplification   |
| blaPER                   | BAL_CASE08 |       |       |      | NoAmplification   |
| blaPSE                   | BAL_CASE08 |       |       |      | NoAmplification   |
| blaROB                   | BAL_CASE08 |       |       |      | NoAmplification   |
| blaSFO                   | BAL_CASE08 | 33.19 | 88.44 | 1.92 | MultipleMeltPeaks |
| blaSHV-01                | BAL_CASE08 | 36.48 | 75.83 | 1.83 | MultipleMeltPeaks |
| blaSHV-02                | BAL_CASE08 |       |       |      | NoAmplification   |
| blaTEM                   | BAL_CASE08 | 28.38 | 79.19 | 1.91 |                   |
| blaTLA                   | BAL_CASE08 |       |       |      | NoAmplification   |
| blaVEB                   | BAL_CASE08 |       |       |      | NoAmplification   |
| blaVIM                   | BAL_CASE08 |       |       |      | NoAmplification   |
| blaZ                     | BAL_CASE08 |       |       |      | NoAmplification   |
| carB                     | BAL_CASE08 |       |       |      | NoAmplification   |
| catA1                    | BAL_CASE08 |       |       |      | NoAmplification   |
| catB3                    | BAL_CASE08 |       |       |      | NoAmplification   |
| catB8                    | BAL_CASE08 | 30.75 | 82.26 | 1.97 |                   |

|            |            |       |       |      |                              |
|------------|------------|-------|-------|------|------------------------------|
| ceoA       | BAL_CASE08 | 31.18 | 82.34 | 1.99 |                              |
| cepA       | BAL_CASE08 |       |       |      | NoAmplification              |
| cfiA       | BAL_CASE08 | 33.12 | 86.26 | 1.92 |                              |
| cfr        | BAL_CASE08 |       |       |      | NoAmplification              |
| cfxA       | BAL_CASE08 | 24.49 | 77.55 | 1.93 |                              |
| cmeA       | BAL_CASE08 | 36.67 | 86.18 | 1.8  |                              |
| cmlA1-01   | BAL_CASE08 |       |       |      | NoAmplification              |
| cmlA1-02   | BAL_CASE08 |       |       |      | NoAmplification              |
| cmr        | BAL_CASE08 |       |       |      | NoAmplification              |
| cmx(A)     | BAL_CASE08 | 26.13 | 86.86 | 1.94 | MultipleMeltPeaks            |
| cphA-01    | BAL_CASE08 | 33.23 | 85.62 | 1.95 | MultipleMeltPeaks            |
| cphA-02    | BAL_CASE08 | 29.51 | 82.48 | 1.98 | MultipleMeltPeaks            |
| dfrA1      | BAL_CASE08 | 36.22 | 83.15 | 1.89 |                              |
| dfrA12     | BAL_CASE08 |       |       |      | NoAmplification              |
| emrD       | BAL_CASE08 |       |       |      | NoAmplification              |
| ereA       | BAL_CASE08 | 38.93 | 83.21 | 1.77 |                              |
| ereB       | BAL_CASE08 | 30.8  | 88.81 | 2.02 |                              |
| erm(34)    | BAL_CASE08 |       |       |      | NoAmplification              |
| erm(35)    | BAL_CASE08 |       |       |      | NoAmplification              |
| erm(36)    | BAL_CASE08 | 36.36 | 81.04 | 1.83 |                              |
| ermA       | BAL_CASE08 |       |       |      | NoAmplification              |
| ermA/ermTR | BAL_CASE08 |       |       |      | NoAmplification              |
| ermB       | BAL_CASE08 |       |       |      | NoAmplification              |
| ermC       | BAL_CASE08 | 39.63 | 85.5  | 1.79 | MultipleMeltPeaks            |
| ermF       | BAL_CASE08 |       |       |      | NoAmplification              |
| ermJ/ermD  | BAL_CASE08 |       |       |      | NoAmplification              |
| ermK-01    | BAL_CASE08 | 38.99 | 73.64 | 1.87 |                              |
| ermK-02    | BAL_CASE08 | 38.61 | 85.64 | 1.7  | MultipleMeltPeaks            |
| ermT-01    | BAL_CASE08 |       |       |      | NoAmplification              |
| ermT-02    | BAL_CASE08 | 33.68 | 91.49 | 1.62 | MultipleMeltPeaks            |
| ermX       | BAL_CASE08 | 39.49 | 87.25 | 1.61 | MultipleMeltPeaks            |
| ermY       | BAL_CASE08 |       |       |      | NoAmplification              |
| fabK       | BAL_CASE08 | 28.8  | 79.52 | 1.98 |                              |
| floR       | BAL_CASE08 |       |       |      | NoAmplification              |
| folA       | BAL_CASE08 |       |       |      | NoAmplification              |
| fosB       | BAL_CASE08 |       |       |      | LowEfficiency, CtIsSmall, S: |
| fosX       | BAL_CASE08 |       |       |      | NoAmplification              |
| fox5       | BAL_CASE08 | 29.13 | 86.02 | 1.87 |                              |
| imiR       | BAL_CASE08 |       |       |      | NoAmplification              |
| ImrA-01    | BAL_CASE08 |       |       |      | NoAmplification              |
| intl       | BAL_CASE08 | 28.49 | 83.35 | 1.81 |                              |
| intl1      | BAL_CASE08 | 21.86 | 87.19 | 1.99 | MultipleMeltPeaks            |
| IS613      | BAL_CASE08 |       |       |      | NoAmplification              |
| lnuA-01    | BAL_CASE08 |       |       |      | NoAmplification              |
| lnuB-01    | BAL_CASE08 |       |       |      | NoAmplification              |
| lnuB-02    | BAL_CASE08 |       |       |      | NoAmplification              |

|               |            |       |       |      |                   |
|---------------|------------|-------|-------|------|-------------------|
| lnuC          | BAL_CASE08 |       |       |      | NoAmplification   |
| marR-01       | BAL_CASE08 | 36.58 | 85.49 | 1.83 |                   |
| matA/mel      | BAL_CASE08 | 28.57 | 77.29 | 2.01 | MultipleMeltPeaks |
| mdet1         | BAL_CASE08 |       |       |      | NoAmplification   |
| mdtA          | BAL_CASE08 |       |       |      | NoAmplification   |
| mdtE/yhiU     | BAL_CASE08 |       |       |      | NoAmplification   |
| mecA          | BAL_CASE08 |       |       |      | NoAmplification   |
| mefA          | BAL_CASE08 | 35.92 | 79.92 | 1.89 |                   |
| mepA          | BAL_CASE08 |       |       |      | CurveFitFailed    |
| mexA          | BAL_CASE08 |       |       |      | NoAmplification   |
| mexD          | BAL_CASE08 | 36.97 | 79.81 | 1.89 | MultipleMeltPeaks |
| mexE          | BAL_CASE08 |       |       |      | NoAmplification   |
| mexF          | BAL_CASE08 | 29.8  | 82.14 | 1.99 | MultipleMeltPeaks |
| mphA-01       | BAL_CASE08 | 30.67 | 86.99 | 1.88 | MultipleMeltPeaks |
| mphA-02       | BAL_CASE08 | 32.73 | 76.69 | 1.61 | MultipleMeltPeaks |
| mphB          | BAL_CASE08 |       |       |      | NoAmplification   |
| mphC          | BAL_CASE08 |       |       |      | NoAmplification   |
| msrA-01       | BAL_CASE08 |       |       |      | NoAmplification   |
| msrC-01       | BAL_CASE08 |       |       |      | NoAmplification   |
| mtrC-01       | BAL_CASE08 |       |       |      | NoAmplification   |
| mtrC-02       | BAL_CASE08 | 34.85 | 84.43 | 1.92 |                   |
| mtrD-02       | BAL_CASE08 | 28.04 | 81.16 | 1.89 | MultipleMeltPeaks |
| mtrD-03       | BAL_CASE08 | 33.15 | 79.28 | 1.79 |                   |
| NDM1          | BAL_CASE08 |       |       |      | NoAmplification   |
| nimE          | BAL_CASE08 | 30.56 | 76.42 | 1.9  |                   |
| nisB          | BAL_CASE08 |       |       |      | NoAmplification   |
| oleC          | BAL_CASE08 |       |       |      | NoAmplification   |
| oprD          | BAL_CASE08 | 28.45 | 92.86 | 1.96 |                   |
| oprJ          | BAL_CASE08 | 36.56 | 77.21 | 1.93 |                   |
| pbp           | BAL_CASE08 |       |       |      | NoAmplification   |
| pbp2x         | BAL_CASE08 |       |       |      | NoAmplification   |
| Pbp5          | BAL_CASE08 |       |       |      | NoAmplification   |
| penA          | BAL_CASE08 | 38.54 | 85.24 | 1.66 |                   |
| pikR1         | BAL_CASE08 | 35.97 | 84.12 | 1.86 |                   |
| pikR2         | BAL_CASE08 | 30.3  | 84.9  | 1.99 |                   |
| pmrA          | BAL_CASE08 |       |       |      | NoAmplification   |
| pncA          | BAL_CASE08 |       |       |      | NoAmplification   |
| putative mulI | BAL_CASE08 | 31.15 | 84.24 | 1.99 |                   |
| qac           | BAL_CASE08 |       |       |      | NoAmplification   |
| qacA          | BAL_CASE08 |       |       |      | NoAmplification   |
| qacA/qacB     | BAL_CASE08 |       |       |      | NoAmplification   |
| qacEdelta1-0  | BAL_CASE08 |       |       |      | NoAmplification   |
| qacEdelta1-0  | BAL_CASE08 | 36.46 | 78.21 | 1.84 |                   |
| qacH-01       | BAL_CASE08 | 32.39 | 84.1  | 1.98 | MultipleMeltPeaks |
| qacH-02       | BAL_CASE08 | 39.84 | 84.24 | 1.55 |                   |
| qnrA          | BAL_CASE08 |       |       |      | NoAmplification   |

|              |            |       |       |      |                   |
|--------------|------------|-------|-------|------|-------------------|
| rarD-02      | BAL_CASE08 |       |       |      | NoAmplification   |
| sat4         | BAL_CASE08 |       |       |      | NoAmplification   |
| sdeB         | BAL_CASE08 |       |       |      | NoAmplification   |
| spcN-01      | BAL_CASE08 |       |       |      | NoAmplification   |
| speA         | BAL_CASE08 |       |       |      | NoAmplification   |
| str          | BAL_CASE08 |       |       |      | NoAmplification   |
| strA         | BAL_CASE08 |       |       |      | NoAmplification   |
| strB         | BAL_CASE08 |       |       |      | NoAmplification   |
| sul1         | BAL_CASE08 |       |       |      | NoAmplification   |
| sul2         | BAL_CASE08 |       |       |      | NoAmplification   |
| sulA/foIP-01 | BAL_CASE08 |       |       |      | NoAmplification   |
| sulA/foIP-03 | BAL_CASE08 | 31.04 | 74.85 | 1.66 |                   |
| tet(32)      | BAL_CASE08 |       |       |      | NoAmplification   |
| tet(34)      | BAL_CASE08 | 29.15 | 75.84 | 1.96 |                   |
| tet(35)      | BAL_CASE08 |       |       |      | NoAmplification   |
| tet(36)-A    | BAL_CASE08 |       |       |      | NoAmplification   |
| tet(36)-B    | BAL_CASE08 |       |       |      | NoAmplification   |
| tet(37)      | BAL_CASE08 | 38.45 | 76.38 | 1.86 | MultipleMeltPeaks |
| tetA-01      | BAL_CASE08 | 33.36 | 85.08 | 1.94 |                   |
| tetA-02      | BAL_CASE08 |       |       |      | NoAmplification   |
| tetB-01      | BAL_CASE08 |       |       |      | NoAmplification   |
| tetB-02      | BAL_CASE08 | 36.73 | 74.28 | 1.87 |                   |
| tetC-01      | BAL_CASE08 |       |       |      | NoAmplification   |
| tetC-02      | BAL_CASE08 |       |       |      | NoAmplification   |
| tetD-01      | BAL_CASE08 |       |       |      | NoAmplification   |
| tetD-02      | BAL_CASE08 | 33.95 | 76.54 | 2    |                   |
| tetE         | BAL_CASE08 |       |       |      | NoAmplification   |
| tetG-01      | BAL_CASE08 | 32.88 | 85.2  | 1.97 |                   |
| tetG-02      | BAL_CASE08 |       |       |      | NoAmplification   |
| tetH         | BAL_CASE08 |       |       |      | NoAmplification   |
| tetJ         | BAL_CASE08 |       |       |      | NoAmplification   |
| tetK         | BAL_CASE08 |       |       |      | NoAmplification   |
| tetL-01      | BAL_CASE08 |       |       |      | NoAmplification   |
| tetL-02      | BAL_CASE08 | 36.57 | 85.44 | 1.68 |                   |
| tetM-01      | BAL_CASE08 | 34.73 | 78.3  | 1.94 |                   |
| tetM-02      | BAL_CASE08 |       |       |      | NoAmplification   |
| tetO-01      | BAL_CASE08 |       |       |      | NoAmplification   |
| tetPA        | BAL_CASE08 |       |       |      | NoAmplification   |
| tetPB-01     | BAL_CASE08 |       |       |      | NoAmplification   |
| tetPB-02     | BAL_CASE08 | 29.18 | 84.79 | 1.88 |                   |
| tetPB-03     | BAL_CASE08 |       |       |      | NoAmplification   |
| tetPB-05     | BAL_CASE08 |       |       |      | NoAmplification   |
| tetQ         | BAL_CASE08 | 25.47 | 76.73 | 1.96 |                   |
| tetR-02      | BAL_CASE08 |       |       |      | NoAmplification   |
| tetR-03      | BAL_CASE08 |       |       |      | NoAmplification   |
| tetS         | BAL_CASE08 |       |       |      | NoAmplification   |

|             |            |       |       |      |                   |
|-------------|------------|-------|-------|------|-------------------|
| tetT        | BAL_CASE08 |       |       |      | NoAmplification   |
| tetU-01     | BAL_CASE08 |       |       |      | NoAmplification   |
| tetV        | BAL_CASE08 |       |       |      | NoAmplification   |
| tetW-01     | BAL_CASE08 |       |       |      | NoAmplification   |
| tetX        | BAL_CASE08 |       |       |      | NoAmplification   |
| tnpA-01     | BAL_CASE08 | 32.59 | 79.81 | 1.96 |                   |
| tnpA-02     | BAL_CASE08 |       |       |      | NoAmplification   |
| tnpA-03     | BAL_CASE08 | 33.23 | 75.04 | 2.08 |                   |
| tnpA-04     | BAL_CASE08 |       |       |      | NoAmplification   |
| tnpA-05     | BAL_CASE08 |       |       |      | NoAmplification   |
| tnpA-07     | BAL_CASE08 |       |       |      | NoAmplification   |
| tolC-01     | BAL_CASE08 |       |       |      | NoAmplification   |
| tolC-02     | BAL_CASE08 | 33.87 | 87.96 | 1.91 |                   |
| tolC-03     | BAL_CASE08 | 32.35 | 85.87 | 1.96 |                   |
| Tp614       | BAL_CASE08 | 36.22 | 73.65 | 1.88 | MultipleMeltPeaks |
| ttgA        | BAL_CASE08 |       |       |      | NoAmplification   |
| ttgB        | BAL_CASE08 | 37.65 | 78.54 | 1.85 | MultipleMeltPeaks |
| vanA        | BAL_CASE08 |       |       |      | NoAmplification   |
| vanB-01     | BAL_CASE08 | 29.12 | 73.69 | 1.67 |                   |
| vanC-01     | BAL_CASE08 | 30.09 | 73.27 | 1.83 |                   |
| vanC-02     | BAL_CASE08 |       |       |      | NoAmplification   |
| vanC-03     | BAL_CASE08 | 35.54 | 75.46 | 1.89 | MultipleMeltPeaks |
| vanC1       | BAL_CASE08 |       |       |      | NoAmplification   |
| vanC2/vanC3 | BAL_CASE08 | 33.05 | 85.67 | 1.39 |                   |
| vanG        | BAL_CASE08 |       |       |      | NoAmplification   |
| vanHB       | BAL_CASE08 |       |       |      | NoAmplification   |
| vanHD       | BAL_CASE08 | 33.96 | 89.63 | 1.85 | MultipleMeltPeaks |
| vanRA-01    | BAL_CASE08 |       |       |      | NoAmplification   |
| vanRA-02    | BAL_CASE08 |       |       |      | NoAmplification   |
| vanRB       | BAL_CASE08 |       |       |      | NoAmplification   |
| vanRC       | BAL_CASE08 |       |       |      | NoAmplification   |
| vanRC4      | BAL_CASE08 |       |       |      | NoAmplification   |
| vanRD       | BAL_CASE08 |       |       |      | NoAmplification   |
| vanSA       | BAL_CASE08 |       |       |      | NoAmplification   |
| vanSB       | BAL_CASE08 |       |       |      | NoAmplification   |
| vanSC-01    | BAL_CASE08 |       |       |      | NoAmplification   |
| vanSC-02    | BAL_CASE08 |       |       |      | NoAmplification   |
| vanTC-01    | BAL_CASE08 |       |       |      | NoAmplification   |
| vanTC-02    | BAL_CASE08 |       |       |      | NoAmplification   |
| vanTE       | BAL_CASE08 |       |       |      | NoAmplification   |
| vanTG       | BAL_CASE08 |       |       |      | NoAmplification   |
| vanWB       | BAL_CASE08 |       |       |      | NoAmplification   |
| vanWG       | BAL_CASE08 |       |       |      | NoAmplification   |
| vanXA       | BAL_CASE08 |       |       |      | NoAmplification   |
| vanXB       | BAL_CASE08 |       |       |      | NoAmplification   |
| vanXD       | BAL_CASE08 | 32.58 | 74.2  | 1.8  |                   |



|              |            |       |       |      |                   |
|--------------|------------|-------|-------|------|-------------------|
| vanYB        | BAL_CASE08 |       |       |      | NoAmplification   |
| vanYD-01     | BAL_CASE08 |       |       |      | CurveFitFailed    |
| vanYD-02     | BAL_CASE08 |       |       |      | NoAmplification   |
| vatB-01      | BAL_CASE08 |       |       |      | NoAmplification   |
| vatB-02      | BAL_CASE08 |       |       |      | NoAmplification   |
| vatC-01      | BAL_CASE08 | 34.52 | 81.45 | 1.9  |                   |
| vatC-02      | BAL_CASE08 | 39.33 | 83.41 | 1.74 | MultipleMeltPeaks |
| vatE-01      | BAL_CASE08 | 28.61 | 76.93 | 2.09 |                   |
| vatE-02      | BAL_CASE08 |       |       |      | NoAmplification   |
| vgaA-01      | BAL_CASE08 |       |       |      | NoAmplification   |
| vgaA-02      | BAL_CASE08 |       |       |      | NoAmplification   |
| vgb-01       | BAL_CASE08 |       |       |      | NoAmplification   |
| vgbB-01      | BAL_CASE08 |       |       |      | NoAmplification   |
| vgbB-02      | BAL_CASE08 |       |       |      | NoAmplification   |
| yceE/mdtG-0  | BAL_CASE08 |       |       |      | NoAmplification   |
| yceE/mdtG-0  | BAL_CASE08 | 34.17 | 81.04 | 2.03 |                   |
| yceL/mdtH-0  | BAL_CASE08 | 34.83 | 83.94 | 1.75 |                   |
| yceL/mdtH-0  | BAL_CASE08 |       |       |      | NoAmplification   |
| yceL/mdtH-0  | BAL_CASE08 |       |       |      | NoAmplification   |
| yidY/mdtL-01 | BAL_CASE08 | 32.37 | 84.71 | 1.95 |                   |
| yidY/mdtL-02 | BAL_CASE08 |       |       |      | CurveFitFailed    |

| Assay          | Sample        | Ct | Tm    | Efficiency | Flags                        |
|----------------|---------------|----|-------|------------|------------------------------|
| 16S rRNA       | BAL_CONTRC    |    | 17.03 | 82.09      | 1.99                         |
| aac            | BAL_CONTRC    |    | 32.71 | 76.53      | 1.41 MultipleMeltPeaks       |
| aac(6')-Ib(akz | BAL_CONTROL01 |    |       |            | NoAmplification              |
| aac(6')-Ib(akz | BAL_CONTRC    |    | 35.16 | 89.06      | 1.9 MultipleMeltPeaks        |
| aac(6')-Ib(akz | BAL_CONTRC    |    | 37.45 | 76.53      | 1.78                         |
| aac(6')-II     | BAL_CONTROL01 |    |       |            | NoAmplification              |
| aac(6')I1      | BAL_CONTROL01 |    |       |            | NoAmplification              |
| aacA/aphD      | BAL_CONTROL01 |    |       |            | NoAmplification              |
| aacC           | BAL_CONTROL01 |    |       |            | NoAmplification              |
| aacC1          | BAL_CONTROL01 |    |       |            | NoAmplification              |
| aacC2          | BAL_CONTROL01 |    |       |            | NoAmplification              |
| aacC4          | BAL_CONTROL01 |    |       |            | NoAmplification              |
| aadA-01        | BAL_CONTROL01 |    |       |            | NoAmplification              |
| aadA-02        | BAL_CONTROL01 |    |       |            | NoAmplification              |
| aadA-1-01      | BAL_CONTROL01 |    |       |            | NoAmplification              |
| aadA-1-02      | BAL_CONTROL01 |    |       |            | NoAmplification              |
| aadA1          | BAL_CONTROL01 |    |       |            | NoAmplification              |
| aadA2-01       | BAL_CONTROL01 |    |       |            | NoAmplification              |
| aadA2-02       | BAL_CONTROL01 |    |       |            | NoAmplification              |
| aadA2-03       | BAL_CONTROL01 |    |       |            | NoAmplification              |
| aadA5-01       | BAL_CONTROL01 |    |       |            | NoAmplification              |
| aadA5-02       | BAL_CONTRC    |    | 34.77 | 78.31      | 1.79                         |
| aadA9-01       | BAL_CONTRC    |    | 37    | 88.31      | 1.83                         |
| aadA9-02       | BAL_CONTROL01 |    |       |            | NoAmplification              |
| aadD           | BAL_CONTROL01 |    |       |            | NoAmplification              |
| aadE           | BAL_CONTRC    |    | 34.5  | 71.66      | 2.02                         |
| acrA-01        | BAL_CONTRC    |    | 36.04 | 88.78      | 1.9 MultipleMeltPeaks        |
| acrA-02        | BAL_CONTROL01 |    |       |            | NoAmplification              |
| acrA-03        | BAL_CONTROL01 |    |       |            | NoAmplification              |
| acrA-04        | BAL_CONTROL01 |    |       |            | CurveFitFailed               |
| acrA-05        | BAL_CONTRC    |    | 33.2  | 85.45      | 1.95                         |
| acrB-01        | BAL_CONTROL01 |    |       |            | NoAmplification              |
| acrF           | BAL_CONTRC    |    | 34.47 | 82.03      | 1.94                         |
| acrR-01        | BAL_CONTROL01 |    |       |            | NoAmplification              |
| acrR-02        | BAL_CONTRC    |    | 37.98 | 87.05      | 1.69 MultipleMeltPeaks       |
| Actin          | BAL_CONTRC    |    | 21.16 | 83.64      | 1.9 MultipleMeltPeaks        |
| adeA           | BAL_CONTRC    |    | 36.9  | 83.43      | 1.71                         |
| ampC-01        | BAL_CONTROL01 |    |       |            | BadR2, CtlIsSmall, Saturatio |
| ampC-02        | BAL_CONTROL01 |    |       |            | NoAmplification              |
| ampC-04        | BAL_CONTROL01 |    |       |            | NoAmplification              |
| ampC-05        | BAL_CONTROL01 |    |       |            | NoAmplification              |
| ampC-06        | BAL_CONTROL01 |    |       |            | NoAmplification              |
| ampC-07        | BAL_CONTRC    |    | 32.28 | 84.04      | 1.92                         |
| ampC-09        | BAL_CONTROL01 |    |       |            | NoAmplification              |
| ampC/blaDH     | BAL_CONTRC    |    | 33.3  | 87.11      | 1.86                         |

|                          |               |       |       |      |                   |
|--------------------------|---------------|-------|-------|------|-------------------|
| aph                      | BAL_CONTROL01 |       |       |      | NoAmplification   |
| aph(2')-Id-01            | BAL_CONTROL01 |       |       |      | NoAmplification   |
| aph(2')-Id-02            | BAL_CONTROL01 |       |       |      | NoAmplification   |
| aph6ia                   | BAL_CONTRC    | 28.09 | 78.27 | 1.98 |                   |
| aphA1(aka k <sub>z</sub> | BAL_CONTROL01 |       |       |      | NoAmplification   |
| bacA-01                  | BAL_CONTROL01 |       |       |      | NoAmplification   |
| bacA-02                  | BAL_CONTROL01 |       |       |      | NoAmplification   |
| BETA-globin              | BAL_CONTRC    | 21.65 | 84.3  | 1.96 |                   |
| bla-ACC-1                | BAL_CONTROL01 |       |       |      | NoAmplification   |
| bla-L1                   | BAL_CONTRC    | 31.99 | 83.78 | 1.96 |                   |
| bla1                     | BAL_CONTROL01 |       |       |      | NoAmplification   |
| blaCMY                   | BAL_CONTROL01 |       |       |      | NoAmplification   |
| blaCMY2-01               | BAL_CONTROL01 |       |       |      | NoAmplification   |
| blaCMY2-02               | BAL_CONTRC    | 32.08 | 85.45 | 1.79 |                   |
| blaCTX-M-01              | BAL_CONTROL01 |       |       |      | NoAmplification   |
| blaCTX-M-02              | BAL_CONTROL01 |       |       |      | NoAmplification   |
| blaCTX-M-03              | BAL_CONTROL01 |       |       |      | NoAmplification   |
| blaCTX-M-04              | BAL_CONTROL01 |       |       |      | NoAmplification   |
| blaCTX-M-05              | BAL_CONTRC    | 32.84 | 75.87 | 1.89 |                   |
| blaCTX-M-06              | BAL_CONTROL01 |       |       |      | NoAmplification   |
| blaGES                   | BAL_CONTROL01 |       |       |      | NoAmplification   |
| blaIMP-01                | BAL_CONTROL01 |       |       |      | NoAmplification   |
| blaIMP-02                | BAL_CONTROL01 |       |       |      | NoAmplification   |
| blaMOX/blaC              | BAL_CONTROL01 |       |       |      | NoAmplification   |
| blaOCH                   | BAL_CONTROL01 |       |       |      | NoAmplification   |
| blaOKP                   | BAL_CONTROL01 |       |       |      | NoAmplification   |
| blaOXA1/blaC             | BAL_CONTROL01 |       |       |      | NoAmplification   |
| blaOXA10-01              | BAL_CONTROL01 |       |       |      | NoAmplification   |
| blaOXA10-02              | BAL_CONTROL01 |       |       |      | NoAmplification   |
| blaOXY                   | BAL_CONTROL01 |       |       |      | NoAmplification   |
| blaPAO                   | BAL_CONTROL01 |       |       |      | NoAmplification   |
| blaPER                   | BAL_CONTROL01 |       |       |      | NoAmplification   |
| blaPSE                   | BAL_CONTROL01 |       |       |      | NoAmplification   |
| blaROB                   | BAL_CONTROL01 |       |       |      | NoAmplification   |
| blaSFO                   | BAL_CONTRC    | 37.66 | 80.86 | 1.79 | MultipleMeltPeaks |
| blaSHV-01                | BAL_CONTROL01 |       |       |      | NoAmplification   |
| blaSHV-02                | BAL_CONTROL01 |       |       |      | NoAmplification   |
| blaTEM                   | BAL_CONTRC    | 28.3  | 79.32 | 1.64 |                   |
| blaTLA                   | BAL_CONTROL01 |       |       |      | NoAmplification   |
| blaVEB                   | BAL_CONTROL01 |       |       |      | NoAmplification   |
| blaVIM                   | BAL_CONTROL01 |       |       |      | NoAmplification   |
| blaZ                     | BAL_CONTROL01 |       |       |      | NoAmplification   |
| carB                     | BAL_CONTROL01 |       |       |      | CurveFitFailed    |
| catA1                    | BAL_CONTROL01 |       |       |      | NoAmplification   |
| catB3                    | BAL_CONTRC    | 32.21 | 79.4  | 1.97 |                   |
| catB8                    | BAL_CONTRC    | 29.7  | 82.94 | 1.97 |                   |

|            |               |       |       |      |                              |
|------------|---------------|-------|-------|------|------------------------------|
| ceoA       | BAL_CONTRC    | 29.27 | 82.35 | 1.98 |                              |
| cepA       | BAL_CONTROL01 |       |       |      | NoAmplification              |
| cfiA       | BAL_CONTROL01 |       |       |      | NoAmplification              |
| cfr        | BAL_CONTROL01 |       |       |      | NoAmplification              |
| cfxA       | BAL_CONTRC    | 18.02 | 77.42 | 1.54 |                              |
| cmeA       | BAL_CONTROL01 |       |       |      | NoAmplification              |
| cmlA1-01   | BAL_CONTROL01 |       |       |      | NoAmplification              |
| cmlA1-02   | BAL_CONTROL01 |       |       |      | NoAmplification              |
| cmr        | BAL_CONTROL01 |       |       |      | NoAmplification              |
| cmx(A)     | BAL_CONTRC    | 32.74 | 78.49 | 1.81 | MultipleMeltPeaks            |
| cphA-01    | BAL_CONTROL01 |       |       |      | NoAmplification              |
| cphA-02    | BAL_CONTROL01 |       |       |      | NoAmplification              |
| dfrA1      | BAL_CONTROL01 |       |       |      | NoAmplification              |
| dfrA12     | BAL_CONTROL01 |       |       |      | NoAmplification              |
| emrD       | BAL_CONTROL01 |       |       |      | NoAmplification              |
| ereA       | BAL_CONTROL01 |       |       |      | NoAmplification              |
| ereB       | BAL_CONTROL01 |       |       |      | NoAmplification              |
| erm(34)    | BAL_CONTROL01 |       |       |      | NoAmplification              |
| erm(35)    | BAL_CONTROL01 |       |       |      | NoAmplification              |
| erm(36)    | BAL_CONTROL01 |       |       |      | NoAmplification              |
| ermA       | BAL_CONTROL01 |       |       |      | NoAmplification              |
| ermA/ermTR | BAL_CONTROL01 |       |       |      | NoAmplification              |
| ermB       | BAL_CONTRC    | 24.08 | 74.94 | 1.75 |                              |
| ermC       | BAL_CONTROL01 |       |       |      | NoAmplification              |
| ermF       | BAL_CONTRC    | 20.18 | 74.71 | 1.99 |                              |
| ermJ/ermD  | BAL_CONTROL01 |       |       |      | NoAmplification              |
| ermK-01    | BAL_CONTROL01 |       |       |      | NoAmplification              |
| ermK-02    | BAL_CONTROL01 |       |       |      | NoAmplification              |
| ermT-01    | BAL_CONTROL01 |       |       |      | NoAmplification              |
| ermT-02    | BAL_CONTROL01 |       |       |      | NoAmplification              |
| ermX       | BAL_CONTRC    | 25.26 | 83.73 | 1.86 |                              |
| ermY       | BAL_CONTROL01 |       |       |      | NoAmplification              |
| fabK       | BAL_CONTRC    | 27.19 | 79    | 2.02 |                              |
| floR       | BAL_CONTROL01 |       |       |      | NoAmplification              |
| folA       | BAL_CONTROL01 |       |       |      | NoAmplification              |
| fosB       | BAL_CONTROL01 |       |       |      | LowEfficiency, CtIsSmall, S: |
| fosX       | BAL_CONTROL01 |       |       |      | NoAmplification              |
| fox5       | BAL_CONTRC    | 33.23 | 85.97 | 1.57 |                              |
| imiR       | BAL_CONTROL01 |       |       |      | NoAmplification              |
| ImrA-01    | BAL_CONTRC    | 37.28 | 82.76 | 1.86 |                              |
| intl       | BAL_CONTRC    | 32.86 | 84.92 | 1.83 |                              |
| intl1      | BAL_CONTRC    | 22.85 | 87.06 | 1.95 | MultipleMeltPeaks            |
| IS613      | BAL_CONTRC    | 23.79 | 80    | 1.82 |                              |
| lnuA-01    | BAL_CONTROL01 |       |       |      | NoAmplification              |
| lnuB-01    | BAL_CONTROL01 |       |       |      | NoAmplification              |
| lnuB-02    | BAL_CONTRC    | 37.84 | 86.96 | 1.81 |                              |

|               |               |       |       |      |                   |
|---------------|---------------|-------|-------|------|-------------------|
| lnuC          | BAL_CONTRC    | 34.09 | 87.11 | 1.83 |                   |
| marR-01       | BAL_CONTRC    | 35.96 | 80.22 | 1.88 |                   |
| matA/mel      | BAL_CONTRC    | 22.02 | 77.66 | 2.02 |                   |
| mdet1         | BAL_CONTROL01 |       |       |      | NoAmplification   |
| mdtA          | BAL_CONTROL01 |       |       |      | CurveFitFailed    |
| mdtE/yhiU     | BAL_CONTROL01 |       |       |      | CurveFitFailed    |
| mecA          | BAL_CONTROL01 |       |       |      | NoAmplification   |
| mefA          | BAL_CONTRC    | 21.61 | 80.71 | 1.98 |                   |
| mepA          | BAL_CONTRC    | 33.5  | 78.73 | 2    |                   |
| mexA          | BAL_CONTROL01 |       |       |      | CurveFitFailed    |
| mexD          | BAL_CONTRC    | 36.31 | 79.74 | 1.92 |                   |
| mexE          | BAL_CONTROL01 |       |       |      | NoAmplification   |
| mexF          | BAL_CONTRC    | 30.81 | 86.3  | 1.61 |                   |
| mphA-01       | BAL_CONTRC    | 30.49 | 88.9  | 1.96 |                   |
| mphA-02       | BAL_CONTRC    | 32.92 | 76.87 | 1.78 |                   |
| mphB          | BAL_CONTROL01 |       |       |      | NoAmplification   |
| mphC          | BAL_CONTROL01 |       |       |      | NoAmplification   |
| msrA-01       | BAL_CONTROL01 |       |       |      | NoAmplification   |
| msrC-01       | BAL_CONTROL01 |       |       |      | NoAmplification   |
| mtrC-01       | BAL_CONTROL01 |       |       |      | NoAmplification   |
| mtrC-02       | BAL_CONTRC    | 38.01 | 84.42 | 1.78 |                   |
| mtrD-02       | BAL_CONTRC    | 30.89 | 80.54 | 2.01 |                   |
| mtrD-03       | BAL_CONTRC    | 33.79 | 79.22 | 1.81 |                   |
| NDM1          | BAL_CONTROL01 |       |       |      | NoAmplification   |
| nimE          | BAL_CONTROL01 |       |       |      | NoAmplification   |
| nisB          | BAL_CONTROL01 |       |       |      | NoAmplification   |
| oleC          | BAL_CONTRC    | 36.54 | 87.28 | 1.82 |                   |
| oprD          | BAL_CONTRC    | 38.07 | 81.51 | 1.79 | MultipleMeltPeaks |
| oprJ          | BAL_CONTRC    | 36.29 | 91.51 | 1.8  |                   |
| pbp           | BAL_CONTROL01 |       |       |      | NoAmplification   |
| pbp2x         | BAL_CONTRC    | 26.69 | 75.45 | 1.85 |                   |
| Pbp5          | BAL_CONTROL01 |       |       |      | NoAmplification   |
| penA          | BAL_CONTROL01 |       |       |      | NoAmplification   |
| pikR1         | BAL_CONTROL01 |       |       |      | CurveFitFailed    |
| pikR2         | BAL_CONTRC    | 31.85 | 85.19 | 1.85 |                   |
| pmrA          | BAL_CONTRC    | 25.25 | 79.19 | 1.99 |                   |
| pncA          | BAL_CONTROL01 |       |       |      | NoAmplification   |
| putative mulI | BAL_CONTROL01 |       |       |      | NoAmplification   |
| qac           | BAL_CONTROL01 |       |       |      | NoAmplification   |
| qacA          | BAL_CONTROL01 |       |       |      | NoAmplification   |
| qacA/qacB     | BAL_CONTROL01 |       |       |      | NoAmplification   |
| qacEdelta1-0  | BAL_CONTROL01 |       |       |      | NoAmplification   |
| qacEdelta1-0  | BAL_CONTRC    | 32.29 | 76.11 | 1.89 |                   |
| qacH-01       | BAL_CONTROL01 |       |       |      | NoAmplification   |
| qacH-02       | BAL_CONTRC    | 34.04 | 83.72 | 1.67 |                   |
| qnrA          | BAL_CONTROL01 |       |       |      | NoAmplification   |

|              |               |       |       |      |                   |
|--------------|---------------|-------|-------|------|-------------------|
| rarD-02      | BAL_CONTRC    | 36.87 | 86    | 1.81 |                   |
| sat4         | BAL_CONTROL01 |       |       |      | NoAmplification   |
| sdeB         | BAL_CONTROL01 |       |       |      | NoAmplification   |
| spcN-01      | BAL_CONTROL01 |       |       |      | NoAmplification   |
| speA         | BAL_CONTROL01 |       |       |      | NoAmplification   |
| str          | BAL_CONTROL01 |       |       |      | NoAmplification   |
| strA         | BAL_CONTROL01 |       |       |      | NoAmplification   |
| strB         | BAL_CONTRC    | 29.25 | 83.74 | 1.92 |                   |
| sul1         | BAL_CONTROL01 |       |       |      | NoAmplification   |
| sul2         | BAL_CONTRC    | 28.14 | 85.46 | 1.58 |                   |
| sulA/foIP-01 | BAL_CONTRC    | 22.53 | 80.52 | 1.91 |                   |
| sulA/foIP-03 | BAL_CONTRC    | 22.34 | 83.2  | 1.99 |                   |
| tet(32)      | BAL_CONTRC    | 24.51 | 81.23 | 1.97 |                   |
| tet(34)      | BAL_CONTRC    | 29.77 | 75.79 | 1.95 |                   |
| tet(35)      | BAL_CONTROL01 |       |       |      | NoAmplification   |
| tet(36)-A    | BAL_CONTROL01 |       |       |      | NoAmplification   |
| tet(36)-B    | BAL_CONTROL01 |       |       |      | NoAmplification   |
| tet(37)      | BAL_CONTRC    | 21.6  | 76.54 | 1.96 |                   |
| tetA-01      | BAL_CONTROL01 |       |       |      | NoAmplification   |
| tetA-02      | BAL_CONTROL01 |       |       |      | NoAmplification   |
| tetB-01      | BAL_CONTRC    | 25.93 | 79.54 | 1.89 |                   |
| tetB-02      | BAL_CONTRC    | 25.76 | 79.57 | 1.99 |                   |
| tetC-01      | BAL_CONTRC    | 26.95 | 74.87 | 1.59 |                   |
| tetC-02      | BAL_CONTRC    | 25.59 | 75.99 | 2.01 |                   |
| tetD-01      | BAL_CONTROL01 |       |       |      | NoAmplification   |
| tetD-02      | BAL_CONTRC    | 28.96 | 77.69 | 1.97 |                   |
| tetE         | BAL_CONTROL01 |       |       |      | NoAmplification   |
| tetG-01      | BAL_CONTRC    | 38.69 | 82.43 | 1.71 |                   |
| tetG-02      | BAL_CONTROL01 |       |       |      | NoAmplification   |
| tetH         | BAL_CONTROL01 |       |       |      | NoAmplification   |
| tetJ         | BAL_CONTROL01 |       |       |      | NoAmplification   |
| tetK         | BAL_CONTROL01 |       |       |      | NoAmplification   |
| tetL-01      | BAL_CONTROL01 |       |       |      | NoAmplification   |
| tetL-02      | BAL_CONTRC    | 40.02 | 83.23 | 1.78 |                   |
| tetM-01      | BAL_CONTRC    | 21.16 | 75.92 | 1.83 |                   |
| tetM-02      | BAL_CONTRC    | 21.16 | 77.55 | 1.86 |                   |
| tetO-01      | BAL_CONTRC    | 25    | 76.46 | 1.59 |                   |
| tetPA        | BAL_CONTROL01 |       |       |      | NoAmplification   |
| tetPB-01     | BAL_CONTROL01 |       |       |      | NoAmplification   |
| tetPB-02     | BAL_CONTRC    | 32.66 | 84.68 | 1.59 |                   |
| tetPB-03     | BAL_CONTROL01 |       |       |      | NoAmplification   |
| tetPB-05     | BAL_CONTROL01 |       |       |      | NoAmplification   |
| tetQ         | BAL_CONTRC    | 19.26 | 76.8  | 2.05 |                   |
| tetR-02      | BAL_CONTRC    | 34.84 | 85.09 | 1.81 | MultipleMeltPeaks |
| tetR-03      | BAL_CONTRC    | 25.29 | 76.07 | 1.97 |                   |
| tetS         | BAL_CONTROL01 |       |       |      | NoAmplification   |

|             |               |       |       |                 |
|-------------|---------------|-------|-------|-----------------|
| tetT        | BAL_CONTROL01 |       |       | NoAmplification |
| tetU-01     | BAL_CONTROL01 |       |       | NoAmplification |
| tetV        | BAL_CONTROL01 |       |       | NoAmplification |
| tetW-01     | BAL_CONTRC    | 27.91 | 81.25 | 1.71            |
| tetX        | BAL_CONTROL01 |       |       | NoAmplification |
| tnpA-01     | BAL_CONTROL01 |       |       | NoAmplification |
| tnpA-02     | BAL_CONTROL01 |       |       | NoAmplification |
| tnpA-03     | BAL_CONTROL01 |       |       | NoAmplification |
| tnpA-04     | BAL_CONTROL01 |       |       | NoAmplification |
| tnpA-05     | BAL_CONTROL01 |       |       | NoAmplification |
| tnpA-07     | BAL_CONTROL01 |       |       | NoAmplification |
| tolC-01     | BAL_CONTROL01 |       |       | NoAmplification |
| tolC-02     | BAL_CONTRC    | 31.2  | 87.93 | 1.91            |
| tolC-03     | BAL_CONTRC    | 34.38 | 83.51 | 1.91            |
| Tp614       | BAL_CONTROL01 |       |       | NoAmplification |
| ttgA        | BAL_CONTROL01 |       |       | NoAmplification |
| ttgB        | BAL_CONTROL01 |       |       | NoAmplification |
| vanA        | BAL_CONTROL01 |       |       | NoAmplification |
| vanB-01     | BAL_CONTROL01 |       |       | NoAmplification |
| vanC-01     | BAL_CONTROL01 |       |       | NoAmplification |
| vanC-02     | BAL_CONTROL01 |       |       | NoAmplification |
| vanC-03     | BAL_CONTRC    | 31.74 | 86.26 | 1.79            |
| vanC1       | BAL_CONTROL01 |       |       | NoAmplification |
| vanC2/vanC3 | BAL_CONTRC    | 35.9  | 73.23 | 1.54            |
| vanG        | BAL_CONTROL01 |       |       | NoAmplification |
| vanHB       | BAL_CONTRC    | 32.89 | 83.21 | 1.94            |
| vanHD       | BAL_CONTROL01 |       |       | NoAmplification |
| vanRA-01    | BAL_CONTROL01 |       |       | NoAmplification |
| vanRA-02    | BAL_CONTROL01 |       |       | NoAmplification |
| vanRB       | BAL_CONTROL01 |       |       | NoAmplification |
| vanRC       | BAL_CONTROL01 |       |       | NoAmplification |
| vanRC4      | BAL_CONTROL01 |       |       | NoAmplification |
| vanRD       | BAL_CONTROL01 |       |       | NoAmplification |
| vanSA       | BAL_CONTROL01 |       |       | NoAmplification |
| vanSB       | BAL_CONTROL01 |       |       | NoAmplification |
| vanSC-01    | BAL_CONTROL01 |       |       | NoAmplification |
| vanSC-02    | BAL_CONTROL01 |       |       | NoAmplification |
| vanTC-01    | BAL_CONTROL01 |       |       | NoAmplification |
| vanTC-02    | BAL_CONTROL01 |       |       | NoAmplification |
| vanTE       | BAL_CONTROL01 |       |       | NoAmplification |
| vanTG       | BAL_CONTROL01 |       |       | NoAmplification |
| vanWB       | BAL_CONTROL01 |       |       | NoAmplification |
| vanWG       | BAL_CONTRC    | 34.43 | 74.22 | 1.95            |
| vanXA       | BAL_CONTROL01 |       |       | NoAmplification |
| vanXB       | BAL_CONTROL01 |       |       | NoAmplification |
| vanXD       | BAL_CONTRC    | 30.4  | 75.17 | 1.97            |

|              |               |       |       |      |                   |
|--------------|---------------|-------|-------|------|-------------------|
| vanYB        | BAL_CONTRC    | 38.14 | 81.23 | 1.76 | MultipleMeltPeaks |
| vanYD-01     | BAL_CONTRC    | 35.54 | 80.91 | 1.81 |                   |
| vanYD-02     | BAL_CONTROL01 |       |       |      | NoAmplification   |
| vatB-01      | BAL_CONTROL01 |       |       |      | NoAmplification   |
| vatB-02      | BAL_CONTROL01 |       |       |      | NoAmplification   |
| vatC-01      | BAL_CONTRC    | 38.98 | 81.51 | 1.76 |                   |
| vatC-02      | BAL_CONTROL01 |       |       |      | CurveFitFailed    |
| vatE-01      | BAL_CONTRC    | 28.81 | 75.96 | 1.99 |                   |
| vatE-02      | BAL_CONTROL01 |       |       |      | NoAmplification   |
| vgaA-01      | BAL_CONTROL01 |       |       |      | NoAmplification   |
| vgaA-02      | BAL_CONTROL01 |       |       |      | NoAmplification   |
| vgb-01       | BAL_CONTROL01 |       |       |      | NoAmplification   |
| vgbB-01      | BAL_CONTROL01 |       |       |      | NoAmplification   |
| vgbB-02      | BAL_CONTROL01 |       |       |      | NoAmplification   |
| yceE/mdtG-0  | BAL_CONTROL01 |       |       |      | NoAmplification   |
| yceE/mdtG-0  | BAL_CONTRC    | 35.07 | 81.09 | 1.96 |                   |
| yceL/mdtH-0  | BAL_CONTRC    | 30.66 | 76.01 | 1.9  | MultipleMeltPeaks |
| yceL/mdtH-0  | BAL_CONTROL01 |       |       |      | NoAmplification   |
| yceL/mdtH-0  | BAL_CONTRC    | 36.24 | 84.29 | 1.74 | MultipleMeltPeaks |
| yidY/mdtL-01 | BAL_CONTRC    | 33.58 | 84.78 | 1.97 | MultipleMeltPeaks |
| yidY/mdtL-02 | BAL_CONTROL01 |       |       |      | NoAmplification   |



| Assay          | Sample        | Ct    | Tm    | Efficiency | Flags             |
|----------------|---------------|-------|-------|------------|-------------------|
| 16S rRNA       | BAL_CONTRC    | 18.35 | 82.27 | 1.93       |                   |
| aac            | BAL_CONTRC    | 32.33 | 79.29 | 1.79       |                   |
| aac(6')-Ib(akz | BAL_CONTROL02 |       |       |            | NoAmplification   |
| aac(6')-Ib(akz | BAL_CONTRC    | 35.93 | 88.39 | 1.87       |                   |
| aac(6')-Ib(akz | BAL_CONTRC    | 40.83 | 78.34 | 1.7        |                   |
| aac(6')-II     | BAL_CONTROL02 |       |       |            | NoAmplification   |
| aac(6')I1      | BAL_CONTROL02 |       |       |            | NoAmplification   |
| aacA/aphD      | BAL_CONTROL02 |       |       |            | NoAmplification   |
| aacC           | BAL_CONTRC    | 36.26 | 85.34 | 1.74       | MultipleMeltPeaks |
| aacC1          | BAL_CONTROL02 |       |       |            | NoAmplification   |
| aacC2          | BAL_CONTROL02 |       |       |            | NoAmplification   |
| aacC4          | BAL_CONTROL02 |       |       |            | NoAmplification   |
| aadA-01        | BAL_CONTROL02 |       |       |            | NoAmplification   |
| aadA-02        | BAL_CONTROL02 |       |       |            | NoAmplification   |
| aadA-1-01      | BAL_CONTROL02 |       |       |            | NoAmplification   |
| aadA-1-02      | BAL_CONTROL02 |       |       |            | NoAmplification   |
| aadA1          | BAL_CONTROL02 |       |       |            | CurveFitFailed    |
| aadA2-01       | BAL_CONTROL02 |       |       |            | NoAmplification   |
| aadA2-02       | BAL_CONTROL02 |       |       |            | NoAmplification   |
| aadA2-03       | BAL_CONTROL02 |       |       |            | NoAmplification   |
| aadA5-01       | BAL_CONTROL02 |       |       |            | NoAmplification   |
| aadA5-02       | BAL_CONTROL02 |       |       |            | NoAmplification   |
| aadA9-01       | BAL_CONTROL02 |       |       |            | NoAmplification   |
| aadA9-02       | BAL_CONTROL02 |       |       |            | NoAmplification   |
| aadD           | BAL_CONTROL02 |       |       |            | NoAmplification   |
| aadE           | BAL_CONTRC    | 37.39 | 73.3  | 1.8        |                   |
| acrA-01        | BAL_CONTRC    | 32.04 | 82.65 | 1.94       |                   |
| acrA-02        | BAL_CONTROL02 |       |       |            | CurveFitFailed    |
| acrA-03        | BAL_CONTROL02 |       |       |            | NoAmplification   |
| acrA-04        | BAL_CONTRC    | 31.98 | 80.62 | 1.96       |                   |
| acrA-05        | BAL_CONTRC    | 32.26 | 87.66 | 2          |                   |
| acrB-01        | BAL_CONTROL02 |       |       |            | NoAmplification   |
| acrF           | BAL_CONTRC    | 32.84 | 82.26 | 1.94       |                   |
| acrR-01        | BAL_CONTROL02 |       |       |            | NoAmplification   |
| acrR-02        | BAL_CONTROL02 |       |       |            | CurveFitFailed    |
| Actin          | BAL_CONTRC    | 22.38 | 87.14 | 1.91       | MultipleMeltPeaks |
| adeA           | BAL_CONTRC    | 33.71 | 84.21 | 1.85       |                   |
| ampC-01        | BAL_CONTRC    | 32.53 | 91.8  | 1.9        |                   |
| ampC-02        | BAL_CONTRC    | 38.55 | 62.13 | 1.85       | MultipleMeltPeaks |
| ampC-04        | BAL_CONTRC    | 36.41 | 77.29 | 2          |                   |
| ampC-05        | BAL_CONTROL02 |       |       |            | NoAmplification   |
| ampC-06        | BAL_CONTROL02 |       |       |            | NoAmplification   |
| ampC-07        | BAL_CONTROL02 |       |       |            | NoAmplification   |
| ampC-09        | BAL_CONTROL02 |       |       |            | NoAmplification   |
| ampC/blaDH     | BAL_CONTRC    | 37.18 | 77.19 | 1.77       | MultipleMeltPeaks |

|                          |               |       |       |      |                   |
|--------------------------|---------------|-------|-------|------|-------------------|
| aph                      | BAL_CONTROL02 |       |       |      | NoAmplification   |
| aph(2')-Id-01            | BAL_CONTROL02 |       |       |      | NoAmplification   |
| aph(2')-Id-02            | BAL_CONTROL02 |       |       |      | NoAmplification   |
| aph6ia                   | BAL_CONTRC    | 29.61 | 78.74 | 1.99 |                   |
| aphA1(aka k <sub>z</sub> | BAL_CONTROL02 |       |       |      | NoAmplification   |
| bacA-01                  | BAL_CONTROL02 |       |       |      | NoAmplification   |
| bacA-02                  | BAL_CONTROL02 |       |       |      | NoAmplification   |
| BETA-globin              | BAL_CONTRC    | 23.41 | 84.37 | 1.96 |                   |
| bla-ACC-1                | BAL_CONTROL02 |       |       |      | NoAmplification   |
| bla-L1                   | BAL_CONTRC    | 34.2  | 82.32 | 1.91 |                   |
| bla1                     | BAL_CONTROL02 |       |       |      | NoAmplification   |
| blaCMY                   | BAL_CONTROL02 |       |       |      | NoAmplification   |
| blaCMY2-01               | BAL_CONTROL02 |       |       |      | NoAmplification   |
| blaCMY2-02               | BAL_CONTRC    | 34.36 | 81.64 | 1.9  |                   |
| blaCTX-M-01              | BAL_CONTROL02 |       |       |      | NoAmplification   |
| blaCTX-M-02              | BAL_CONTROL02 |       |       |      | NoAmplification   |
| blaCTX-M-03              | BAL_CONTROL02 |       |       |      | NoAmplification   |
| blaCTX-M-04              | BAL_CONTRC    | 36.06 | 76.57 | 1.98 |                   |
| blaCTX-M-05              | BAL_CONTROL02 |       |       |      | NoAmplification   |
| blaCTX-M-06              | BAL_CONTROL02 |       |       |      | NoAmplification   |
| blaGES                   | BAL_CONTROL02 |       |       |      | NoAmplification   |
| blaIMP-01                | BAL_CONTROL02 |       |       |      | NoAmplification   |
| blaIMP-02                | BAL_CONTROL02 |       |       |      | NoAmplification   |
| blaMOX/blaC              | BAL_CONTRC    | 37.85 | 82.49 | 1.79 |                   |
| blaOCH                   | BAL_CONTROL02 |       |       |      | NoAmplification   |
| blaOKP                   | BAL_CONTROL02 |       |       |      | NoAmplification   |
| blaOXA1/blaC             | BAL_CONTROL02 |       |       |      | NoAmplification   |
| blaOXA10-01              | BAL_CONTROL02 |       |       |      | NoAmplification   |
| blaOXA10-02              | BAL_CONTROL02 |       |       |      | NoAmplification   |
| blaOXY                   | BAL_CONTROL02 |       |       |      | NoAmplification   |
| blaPAO                   | BAL_CONTROL02 |       |       |      | NoAmplification   |
| blaPER                   | BAL_CONTROL02 |       |       |      | NoAmplification   |
| blaPSE                   | BAL_CONTROL02 |       |       |      | NoAmplification   |
| blaROB                   | BAL_CONTROL02 |       |       |      | NoAmplification   |
| blaSFO                   | BAL_CONTRC    | 39.39 | 62.83 | 1.72 | MultipleMeltPeaks |
| blaSHV-01                | BAL_CONTROL02 |       |       |      | NoAmplification   |
| blaSHV-02                | BAL_CONTROL02 |       |       |      | NoAmplification   |
| blaTEM                   | BAL_CONTRC    | 26.27 | 79.19 | 1.74 |                   |
| blaTLA                   | BAL_CONTROL02 |       |       |      | NoAmplification   |
| blaVEB                   | BAL_CONTROL02 |       |       |      | NoAmplification   |
| blaVIM                   | BAL_CONTROL02 |       |       |      | NoAmplification   |
| blaZ                     | BAL_CONTROL02 |       |       |      | NoAmplification   |
| carB                     | BAL_CONTROL02 |       |       |      | NoAmplification   |
| catA1                    | BAL_CONTROL02 |       |       |      | NoAmplification   |
| catB3                    | BAL_CONTROL02 |       |       |      | NoAmplification   |
| catB8                    | BAL_CONTRC    | 29.55 | 83.65 | 1.93 | MultipleMeltPeaks |

|            |               |       |       |      |                              |
|------------|---------------|-------|-------|------|------------------------------|
| ceoA       | BAL_CONTRC    | 31.89 | 82.52 | 1.97 |                              |
| cepA       | BAL_CONTROL02 |       |       |      | NoAmplification              |
| cfiA       | BAL_CONTRC    | 35.3  | 87.7  | 1.86 |                              |
| cfr        | BAL_CONTROL02 |       |       |      | NoAmplification              |
| cfxA       | BAL_CONTRC    | 21.3  | 77.56 | 1.78 |                              |
| cmeA       | BAL_CONTROL02 |       |       |      | NoAmplification              |
| cmlA1-01   | BAL_CONTROL02 |       |       |      | NoAmplification              |
| cmlA1-02   | BAL_CONTROL02 |       |       |      | NoAmplification              |
| cmr        | BAL_CONTROL02 |       |       |      | NoAmplification              |
| cmx(A)     | BAL_CONTRC    | 34.15 | 85.41 | 1.88 |                              |
| cphA-01    | BAL_CONTROL02 |       |       |      | NoAmplification              |
| cphA-02    | BAL_CONTROL02 |       |       |      | NoAmplification              |
| dfrA1      | BAL_CONTROL02 |       |       |      | NoAmplification              |
| dfrA12     | BAL_CONTROL02 |       |       |      | NoAmplification              |
| emrD       | BAL_CONTROL02 |       |       |      | NoAmplification              |
| ereA       | BAL_CONTROL02 |       |       |      | NoAmplification              |
| ereB       | BAL_CONTRC    | 37.91 | 79.28 | 1.8  | MultipleMeltPeaks            |
| erm(34)    | BAL_CONTROL02 |       |       |      | NoAmplification              |
| erm(35)    | BAL_CONTROL02 |       |       |      | NoAmplification              |
| erm(36)    | BAL_CONTROL02 |       |       |      | NoAmplification              |
| ermA       | BAL_CONTROL02 |       |       |      | NoAmplification              |
| ermA/ermTR | BAL_CONTROL02 |       |       |      | NoAmplification              |
| ermB       | BAL_CONTRC    | 27.58 | 75.04 | 1.91 |                              |
| ermC       | BAL_CONTROL02 |       |       |      | NoAmplification              |
| ermF       | BAL_CONTROL02 |       |       |      | NoAmplification              |
| ermJ/ermD  | BAL_CONTROL02 |       |       |      | NoAmplification              |
| ermK-01    | BAL_CONTROL02 |       |       |      | NoAmplification              |
| ermK-02    | BAL_CONTROL02 |       |       |      | NoAmplification              |
| ermT-01    | BAL_CONTROL02 |       |       |      | NoAmplification              |
| ermT-02    | BAL_CONTROL02 |       |       |      | NoAmplification              |
| ermX       | BAL_CONTRC    | 27.56 | 83.71 | 1.87 |                              |
| ermY       | BAL_CONTROL02 |       |       |      | NoAmplification              |
| fabK       | BAL_CONTRC    | 28.95 | 78.1  | 1.95 |                              |
| floR       | BAL_CONTROL02 |       |       |      | NoAmplification              |
| folA       | BAL_CONTROL02 |       |       |      | NoAmplification              |
| fosB       | BAL_CONTROL02 |       |       |      | LowEfficiency, CtIsSmall, S: |
| fosX       | BAL_CONTROL02 |       |       |      | NoAmplification              |
| fox5       | BAL_CONTRC    | 31.75 | 86.38 | 1.67 |                              |
| imiR       | BAL_CONTROL02 |       |       |      | NoAmplification              |
| ImrA-01    | BAL_CONTROL02 |       |       |      | NoAmplification              |
| intl       | BAL_CONTRC    | 33.16 | 84.89 | 1.88 |                              |
| intl1      | BAL_CONTRC    | 22.9  | 86.78 | 1.99 | MultipleMeltPeaks            |
| IS613      | BAL_CONTRC    | 25.14 | 80.32 | 1.91 |                              |
| lnuA-01    | BAL_CONTROL02 |       |       |      | NoAmplification              |
| lnuB-01    | BAL_CONTROL02 |       |       |      | NoAmplification              |
| lnuB-02    | BAL_CONTROL02 |       |       |      | NoAmplification              |

|                |               |       |       |      |                   |
|----------------|---------------|-------|-------|------|-------------------|
| lnuC           | BAL_CONTRC    | 38.32 | 79.59 | 1.63 | MultipleMeltPeaks |
| marR-01        | BAL_CONTROL02 |       |       |      | NoAmplification   |
| matA/mel       | BAL_CONTRC    | 23.15 | 77.8  | 2.05 |                   |
| mdet11         | BAL_CONTROL02 |       |       |      | NoAmplification   |
| mdtA           | BAL_CONTRC    | 39.43 | 86.28 | 1.69 | MultipleMeltPeaks |
| mdtE/yhiU      | BAL_CONTROL02 |       |       |      | NoAmplification   |
| mecA           | BAL_CONTROL02 |       |       |      | NoAmplification   |
| mefA           | BAL_CONTRC    | 22.27 | 80.76 | 1.98 |                   |
| mepA           | BAL_CONTROL02 |       |       |      | CurveFitFailed    |
| mexA           | BAL_CONTROL02 |       |       |      | NoAmplification   |
| mexD           | BAL_CONTROL02 |       |       |      | NoAmplification   |
| mexE           | BAL_CONTROL02 |       |       |      | NoAmplification   |
| mexF           | BAL_CONTRC    | 31.22 | 81.62 | 1.75 | MultipleMeltPeaks |
| mphA-01        | BAL_CONTRC    | 30.73 | 86.81 | 1.93 |                   |
| mphA-02        | BAL_CONTRC    | 31.03 | 77.44 | 1.78 |                   |
| mphB           | BAL_CONTROL02 |       |       |      | NoAmplification   |
| mphC           | BAL_CONTROL02 |       |       |      | NoAmplification   |
| msrA-01        | BAL_CONTROL02 |       |       |      | NoAmplification   |
| msrC-01        | BAL_CONTROL02 |       |       |      | NoAmplification   |
| mtrC-01        | BAL_CONTROL02 |       |       |      | NoAmplification   |
| mtrC-02        | BAL_CONTROL02 |       |       |      | NoAmplification   |
| mtrD-02        | BAL_CONTRC    | 29.99 | 81.32 | 1.95 |                   |
| mtrD-03        | BAL_CONTRC    | 29.98 | 79.69 | 1.77 |                   |
| NDM1           | BAL_CONTROL02 |       |       |      | NoAmplification   |
| nimE           | BAL_CONTROL02 |       |       |      | NoAmplification   |
| nisB           | BAL_CONTROL02 |       |       |      | NoAmplification   |
| oleC           | BAL_CONTRC    | 35.78 | 84.25 | 1.86 |                   |
| oprD           | BAL_CONTRC    | 37.13 | 81.2  | 1.82 | MultipleMeltPeaks |
| oprJ           | BAL_CONTROL02 |       |       |      | NoAmplification   |
| pbp            | BAL_CONTROL02 |       |       |      | NoAmplification   |
| pbp2x          | BAL_CONTROL02 |       |       |      | NoAmplification   |
| Pbp5           | BAL_CONTROL02 |       |       |      | NoAmplification   |
| penA           | BAL_CONTRC    | 34.95 | 84.08 | 1.73 | MultipleMeltPeaks |
| pikR1          | BAL_CONTROL02 |       |       |      | CurveFitFailed    |
| pikR2          | BAL_CONTRC    | 34.51 | 85.14 | 2.03 |                   |
| pmrA           | BAL_CONTRC    | 25.77 | 79.64 | 2.07 |                   |
| pncA           | BAL_CONTROL02 |       |       |      | NoAmplification   |
| putative multi | BAL_CONTRC    | 33.46 | 84.23 | 1.88 | MultipleMeltPeaks |
| qac            | BAL_CONTRC    | 38.93 | 74.97 | 1.87 | MultipleMeltPeaks |
| qacA           | BAL_CONTROL02 |       |       |      | NoAmplification   |
| qacA/qacB      | BAL_CONTROL02 |       |       |      | NoAmplification   |
| qacEdelta1-0   | BAL_CONTROL02 |       |       |      | NoAmplification   |
| qacEdelta1-0   | BAL_CONTROL02 |       |       |      | NoAmplification   |
| qacH-01        | BAL_CONTRC    | 37.92 | 81.78 | 1.88 |                   |
| qacH-02        | BAL_CONTRC    | 37.17 | 84.16 | 1.65 |                   |
| qnrA           | BAL_CONTROL02 |       |       |      | NoAmplification   |

|              |               |       |       |                 |
|--------------|---------------|-------|-------|-----------------|
| rarD-02      | BAL_CONTROL02 |       |       | NoAmplification |
| sat4         | BAL_CONTROL02 |       |       | NoAmplification |
| sdeB         | BAL_CONTROL02 |       |       | NoAmplification |
| spcN-01      | BAL_CONTROL02 |       |       | NoAmplification |
| speA         | BAL_CONTROL02 |       |       | NoAmplification |
| str          | BAL_CONTROL02 |       |       | NoAmplification |
| strA         | BAL_CONTROL02 |       |       | NoAmplification |
| strB         | BAL_CONTROL02 |       |       | NoAmplification |
| sul1         | BAL_CONTROL02 |       |       | NoAmplification |
| sul2         | BAL_CONTROL02 |       |       | NoAmplification |
| sulA/foIP-01 | BAL_CONTRC    | 23.51 | 80.92 | 1.94            |
| sulA/foIP-03 | BAL_CONTRC    | 24.67 | 83.24 | 1.98            |
| tet(32)      | BAL_CONTRC    | 26.86 | 81.2  | 1.97            |
| tet(34)      | BAL_CONTRC    | 30.56 | 75.8  | 1.97            |
| tet(35)      | BAL_CONTROL02 |       |       | NoAmplification |
| tet(36)-A    | BAL_CONTROL02 |       |       | NoAmplification |
| tet(36)-B    | BAL_CONTROL02 |       |       | NoAmplification |
| tet(37)      | BAL_CONTRC    | 23.19 | 76.64 | 1.96            |
| tetA-01      | BAL_CONTROL02 |       |       | NoAmplification |
| tetA-02      | BAL_CONTROL02 |       |       | NoAmplification |
| tetB-01      | BAL_CONTRC    | 27.75 | 79.61 | 1.9             |
| tetB-02      | BAL_CONTRC    | 26.64 | 79.61 | 1.99            |
| tetC-01      | BAL_CONTRC    | 27.77 | 75.05 | 1.69            |
| tetC-02      | BAL_CONTRC    | 27.19 | 76.04 | 2.02            |
| tetD-01      | BAL_CONTROL02 |       |       | NoAmplification |
| tetD-02      | BAL_CONTRC    | 26.59 | 78.33 | 1.93            |
| tetE         | BAL_CONTROL02 |       |       | NoAmplification |
| tetG-01      | BAL_CONTROL02 |       |       | CurveFitFailed  |
| tetG-02      | BAL_CONTROL02 |       |       | NoAmplification |
| tetH         | BAL_CONTROL02 |       |       | NoAmplification |
| tetJ         | BAL_CONTROL02 |       |       | NoAmplification |
| tetK         | BAL_CONTROL02 |       |       | NoAmplification |
| tetL-01      | BAL_CONTROL02 |       |       | NoAmplification |
| tetL-02      | BAL_CONTROL02 |       |       | CurveFitFailed  |
| tetM-01      | BAL_CONTRC    | 26.37 | 75.73 | 1.92            |
| tetM-02      | BAL_CONTRC    | 27.29 | 77.54 | 1.98            |
| tetO-01      | BAL_CONTRC    | 26.69 | 76.57 | 1.8             |
| tetPA        | BAL_CONTROL02 |       |       | NoAmplification |
| tetPB-01     | BAL_CONTROL02 |       |       | NoAmplification |
| tetPB-02     | BAL_CONTRC    | 32.15 | 83.32 | 1.71            |
| tetPB-03     | BAL_CONTROL02 |       |       | NoAmplification |
| tetPB-05     | BAL_CONTROL02 |       |       | NoAmplification |
| tetQ         | BAL_CONTRC    | 20.22 | 76.37 | 2.04            |
| tetR-02      | BAL_CONTRC    | 36.02 | 86.49 | 1.92            |
| tetR-03      | BAL_CONTRC    | 27.78 | 76.11 | 1.97            |
| tetS         | BAL_CONTRC    | 32.44 | 87.29 | 1.75            |

|             |               |       |       |      |                   |
|-------------|---------------|-------|-------|------|-------------------|
| tetT        | BAL_CONTRC    | 31.34 | 74.02 | 2.09 |                   |
| tetU-01     | BAL_CONTROL02 |       |       |      | NoAmplification   |
| tetV        | BAL_CONTROL02 |       |       |      | NoAmplification   |
| tetW-01     | BAL_CONTRC    | 25.85 | 81.51 | 1.88 |                   |
| tetX        | BAL_CONTROL02 |       |       |      | NoAmplification   |
| tnpA-01     | BAL_CONTROL02 |       |       |      | NoAmplification   |
| tnpA-02     | BAL_CONTROL02 |       |       |      | NoAmplification   |
| tnpA-03     | BAL_CONTROL02 |       |       |      | CurveFitFailed    |
| tnpA-04     | BAL_CONTROL02 |       |       |      | NoAmplification   |
| tnpA-05     | BAL_CONTROL02 |       |       |      | NoAmplification   |
| tnpA-07     | BAL_CONTROL02 |       |       |      | NoAmplification   |
| tolC-01     | BAL_CONTRC    | 34.78 | 81.36 | 1.83 | MultipleMeltPeaks |
| tolC-02     | BAL_CONTRC    | 35.12 | 87.1  | 1.85 | MultipleMeltPeaks |
| tolC-03     | BAL_CONTRC    | 33.28 | 84.63 | 1.93 |                   |
| Tp614       | BAL_CONTROL02 |       |       |      | NoAmplification   |
| ttgA        | BAL_CONTROL02 |       |       |      | NoAmplification   |
| ttgB        | BAL_CONTRC    | 36.27 | 88.32 | 1.83 |                   |
| vanA        | BAL_CONTROL02 |       |       |      | NoAmplification   |
| vanB-01     | BAL_CONTRC    | 27.81 | 73.42 | 1.5  |                   |
| vanC-01     | BAL_CONTROL02 |       |       |      | NoAmplification   |
| vanC-02     | BAL_CONTROL02 |       |       |      | NoAmplification   |
| vanC-03     | BAL_CONTRC    | 31.75 | 77.85 | 1.88 |                   |
| vanC1       | BAL_CONTROL02 |       |       |      | NoAmplification   |
| vanC2/vanC3 | BAL_CONTRC    | 34.1  | 80.32 | 1.55 | MultipleMeltPeaks |
| vanG        | BAL_CONTROL02 |       |       |      | NoAmplification   |
| vanHB       | BAL_CONTROL02 |       |       |      | NoAmplification   |
| vanHD       | BAL_CONTROL02 |       |       |      | NoAmplification   |
| vanRA-01    | BAL_CONTROL02 |       |       |      | NoAmplification   |
| vanRA-02    | BAL_CONTROL02 |       |       |      | NoAmplification   |
| vanRB       | BAL_CONTROL02 |       |       |      | NoAmplification   |
| vanRC       | BAL_CONTROL02 |       |       |      | NoAmplification   |
| vanRC4      | BAL_CONTROL02 |       |       |      | NoAmplification   |
| vanRD       | BAL_CONTROL02 |       |       |      | NoAmplification   |
| vanSA       | BAL_CONTROL02 |       |       |      | NoAmplification   |
| vanSB       | BAL_CONTROL02 |       |       |      | NoAmplification   |
| vanSC-01    | BAL_CONTROL02 |       |       |      | NoAmplification   |
| vanSC-02    | BAL_CONTROL02 |       |       |      | NoAmplification   |
| vanTC-01    | BAL_CONTROL02 |       |       |      | NoAmplification   |
| vanTC-02    | BAL_CONTROL02 |       |       |      | NoAmplification   |
| vanTE       | BAL_CONTROL02 |       |       |      | NoAmplification   |
| vanTG       | BAL_CONTROL02 |       |       |      | NoAmplification   |
| vanWB       | BAL_CONTROL02 |       |       |      | NoAmplification   |
| vanWG       | BAL_CONTRC    | 35.51 | 74.52 | 1.95 |                   |
| vanXA       | BAL_CONTROL02 |       |       |      | NoAmplification   |
| vanXB       | BAL_CONTROL02 |       |       |      | NoAmplification   |
| vanXD       | BAL_CONTRC    | 31.06 | 74.81 | 2    |                   |

|              |               |       |       |      |                 |
|--------------|---------------|-------|-------|------|-----------------|
| vanYB        | BAL_CONTRC    | 35.89 | 85.13 | 1.88 |                 |
| vanYD-01     | BAL_CONTRC    | 37.4  | 80.75 | 1.8  |                 |
| vanYD-02     | BAL_CONTRC    | 39.76 | 73.23 | 1.79 |                 |
| vatB-01      | BAL_CONTROL02 |       |       |      | NoAmplification |
| vatB-02      | BAL_CONTROL02 |       |       |      | NoAmplification |
| vatC-01      | BAL_CONTROL02 |       |       |      | NoAmplification |
| vatC-02      | BAL_CONTRC    | 38.06 | 87.81 | 1.72 |                 |
| vatE-01      | BAL_CONTRC    | 30.59 | 76.04 | 2.02 |                 |
| vatE-02      | BAL_CONTROL02 |       |       |      | NoAmplification |
| vgaA-01      | BAL_CONTROL02 |       |       |      | NoAmplification |
| vgaA-02      | BAL_CONTROL02 |       |       |      | NoAmplification |
| vgb-01       | BAL_CONTROL02 |       |       |      | NoAmplification |
| vgbB-01      | BAL_CONTROL02 |       |       |      | NoAmplification |
| vgbB-02      | BAL_CONTROL02 |       |       |      | NoAmplification |
| yceE/mdtG-0  | BAL_CONTROL02 |       |       |      | NoAmplification |
| yceE/mdtG-0  | BAL_CONTROL02 |       |       |      | NoAmplification |
| yceL/mdtH-0  | BAL_CONTRC    | 33.37 | 77.75 | 1.92 |                 |
| yceL/mdtH-0  | BAL_CONTROL02 |       |       |      | NoAmplification |
| yceL/mdtH-0  | BAL_CONTROL02 |       |       |      | NoAmplification |
| yidY/mdtL-01 | BAL_CONTRC    | 35.88 | 82.37 | 1.85 |                 |
| yidY/mdtL-02 | BAL_CONTROL02 |       |       |      | NoAmplification |

| Assay          | Sample        | Ct | Tm    | Efficiency | Flags                       |
|----------------|---------------|----|-------|------------|-----------------------------|
| 16S rRNA       | BAL_CONTRC    |    | 18.74 | 82.35      | 1.91                        |
| aac            | BAL_CONTRC    |    | 32.9  | 86.43      | 1.74 MultipleMeltPeaks      |
| aac(6')-Ib(akz | BAL_CONTROL03 |    |       |            | NoAmplification             |
| aac(6')-Ib(akz | BAL_CONTRC    |    | 36.35 | 78.86      | 1.85 MultipleMeltPeaks      |
| aac(6')-Ib(akz | BAL_CONTRC    |    | 36.93 | 76.4       | 1.79                        |
| aac(6')-II     | BAL_CONTRC    |    | 36.75 | 83.12      | 1.79                        |
| aac(6')I1      | BAL_CONTROL03 |    |       |            | NoAmplification             |
| aacA/aphD      | BAL_CONTROL03 |    |       |            | NoAmplification             |
| aacC           | BAL_CONTRC    |    | 36.94 | 86.1       | 1.74                        |
| aacC1          | BAL_CONTROL03 |    |       |            | NoAmplification             |
| aacC2          | BAL_CONTROL03 |    |       |            | NoAmplification             |
| aacC4          | BAL_CONTROL03 |    |       |            | NoAmplification             |
| aadA-01        | BAL_CONTROL03 |    |       |            | NoAmplification             |
| aadA-02        | BAL_CONTROL03 |    |       |            | NoAmplification             |
| aadA-1-01      | BAL_CONTROL03 |    |       |            | NoAmplification             |
| aadA-1-02      | BAL_CONTROL03 |    |       |            | NoAmplification             |
| aadA1          | BAL_CONTROL03 |    |       |            | NoAmplification             |
| aadA2-01       | BAL_CONTROL03 |    |       |            | NoAmplification             |
| aadA2-02       | BAL_CONTROL03 |    |       |            | NoAmplification             |
| aadA2-03       | BAL_CONTROL03 |    |       |            | NoAmplification             |
| aadA5-01       | BAL_CONTROL03 |    |       |            | NoAmplification             |
| aadA5-02       | BAL_CONTROL03 |    |       |            | BadR2, CtlsSmall, Saturatio |
| aadA9-01       | BAL_CONTROL03 |    |       |            | NoAmplification             |
| aadA9-02       | BAL_CONTROL03 |    |       |            | NoAmplification             |
| aadD           | BAL_CONTROL03 |    |       |            | NoAmplification             |
| aadE           | BAL_CONTROL03 |    |       |            | NoAmplification             |
| acrA-01        | BAL_CONTRC    |    | 33.82 | 88.79      | 1.95                        |
| acrA-02        | BAL_CONTROL03 |    |       |            | NoAmplification             |
| acrA-03        | BAL_CONTROL03 |    |       |            | NoAmplification             |
| acrA-04        | BAL_CONTRC    |    | 31.31 | 80.56      | 1.92                        |
| acrA-05        | BAL_CONTRC    |    | 32.44 | 89.11      | 1.97 MultipleMeltPeaks      |
| acrB-01        | BAL_CONTROL03 |    |       |            | NoAmplification             |
| acrF           | BAL_CONTRC    |    | 33.42 | 83.01      | 1.54 MultipleMeltPeaks      |
| acrR-01        | BAL_CONTROL03 |    |       |            | CurveFitFailed              |
| acrR-02        | BAL_CONTRC    |    | 33.57 | 86.24      | 1.87                        |
| Actin          | BAL_CONTRC    |    | 20.65 | 83.65      | 1.77 MultipleMeltPeaks      |
| adeA           | BAL_CONTRC    |    | 35.97 | 83.65      | 1.77                        |
| ampC-01        | BAL_CONTRC    |    | 34.95 | 79.17      | 1.92 MultipleMeltPeaks      |
| ampC-02        | BAL_CONTROL03 |    |       |            | NoAmplification             |
| ampC-04        | BAL_CONTROL03 |    |       |            | NoAmplification             |
| ampC-05        | BAL_CONTROL03 |    |       |            | NoAmplification             |
| ampC-06        | BAL_CONTROL03 |    |       |            | NoAmplification             |
| ampC-07        | BAL_CONTROL03 |    |       |            | NoAmplification             |
| ampC-09        | BAL_CONTROL03 |    |       |            | NoAmplification             |
| ampC/blaDH     | BAL_CONTRC    |    | 31.41 | 76.85      | 1.94 MultipleMeltPeaks      |



|                          |               |       |       |      |                   |
|--------------------------|---------------|-------|-------|------|-------------------|
| aph                      | BAL_CONTROL03 |       |       |      | NoAmplification   |
| aph(2')-Id-01            | BAL_CONTROL03 |       |       |      | NoAmplification   |
| aph(2')-Id-02            | BAL_CONTROL03 |       |       |      | NoAmplification   |
| aph6ia                   | BAL_CONTRC    | 29.6  | 78.29 | 1.97 | MultipleMeltPeaks |
| aphA1(aka k <sub>z</sub> | BAL_CONTROL03 |       |       |      | NoAmplification   |
| bacA-01                  | BAL_CONTROL03 |       |       |      | NoAmplification   |
| bacA-02                  | BAL_CONTROL03 |       |       |      | NoAmplification   |
| BETA-globin              | BAL_CONTRC    | 21.61 | 84.28 | 1.94 |                   |
| bla-ACC-1                | BAL_CONTROL03 |       |       |      | NoAmplification   |
| bla-L1                   | BAL_CONTRC    | 30.58 | 82.64 | 1.92 | MultipleMeltPeaks |
| bla1                     | BAL_CONTROL03 |       |       |      | NoAmplification   |
| blaCMY                   | BAL_CONTROL03 |       |       |      | NoAmplification   |
| blaCMY2-01               | BAL_CONTROL03 |       |       |      | NoAmplification   |
| blaCMY2-02               | BAL_CONTRC    | 32.36 | 85.49 | 1.87 | MultipleMeltPeaks |
| blaCTX-M-01              | BAL_CONTROL03 |       |       |      | NoAmplification   |
| blaCTX-M-02              | BAL_CONTROL03 |       |       |      | NoAmplification   |
| blaCTX-M-03              | BAL_CONTROL03 |       |       |      | NoAmplification   |
| blaCTX-M-04              | BAL_CONTROL03 |       |       |      | NoAmplification   |
| blaCTX-M-05              | BAL_CONTROL03 |       |       |      | NoAmplification   |
| blaCTX-M-06              | BAL_CONTROL03 |       |       |      | NoAmplification   |
| blaGES                   | BAL_CONTROL03 |       |       |      | NoAmplification   |
| blaIMP-01                | BAL_CONTROL03 |       |       |      | NoAmplification   |
| blaIMP-02                | BAL_CONTROL03 |       |       |      | NoAmplification   |
| blaMOX/blaC              | BAL_CONTROL03 |       |       |      | NoAmplification   |
| blaOCH                   | BAL_CONTROL03 |       |       |      | NoAmplification   |
| blaOKP                   | BAL_CONTROL03 |       |       |      | NoAmplification   |
| blaOXA1/blaC             | BAL_CONTROL03 |       |       |      | NoAmplification   |
| blaOXA10-01              | BAL_CONTROL03 |       |       |      | NoAmplification   |
| blaOXA10-02              | BAL_CONTROL03 |       |       |      | NoAmplification   |
| blaOXY                   | BAL_CONTROL03 |       |       |      | NoAmplification   |
| blaPAO                   | BAL_CONTROL03 |       |       |      | NoAmplification   |
| blaPER                   | BAL_CONTROL03 |       |       |      | NoAmplification   |
| blaPSE                   | BAL_CONTROL03 |       |       |      | NoAmplification   |
| blaROB                   | BAL_CONTROL03 |       |       |      | NoAmplification   |
| blaSFO                   | BAL_CONTROL03 |       |       |      | NoAmplification   |
| blaSHV-01                | BAL_CONTROL03 |       |       |      | NoAmplification   |
| blaSHV-02                | BAL_CONTROL03 |       |       |      | NoAmplification   |
| blaTEM                   | BAL_CONTROL03 |       |       |      | NoAmplification   |
| blaTLA                   | BAL_CONTROL03 |       |       |      | NoAmplification   |
| blaVEB                   | BAL_CONTROL03 |       |       |      | NoAmplification   |
| blaVIM                   | BAL_CONTROL03 |       |       |      | NoAmplification   |
| blaZ                     | BAL_CONTROL03 |       |       |      | NoAmplification   |
| carB                     | BAL_CONTROL03 |       |       |      | NoAmplification   |
| catA1                    | BAL_CONTROL03 |       |       |      | NoAmplification   |
| catB3                    | BAL_CONTROL03 |       |       |      | NoAmplification   |
| catB8                    | BAL_CONTRC    | 31.05 | 82.01 | 1.96 |                   |

|            |               |       |       |      |                              |
|------------|---------------|-------|-------|------|------------------------------|
| ceoA       | BAL_CONTRC    | 31.32 | 82.47 | 1.97 |                              |
| cepA       | BAL_CONTROL03 |       |       |      | NoAmplification              |
| cfiA       | BAL_CONTROL03 |       |       |      | NoAmplification              |
| cfr        | BAL_CONTROL03 |       |       |      | NoAmplification              |
| cfxA       | BAL_CONTRC    | 20.48 | 77.5  | 1.65 |                              |
| cmeA       | BAL_CONTROL03 |       |       |      | NoAmplification              |
| cmlA1-01   | BAL_CONTROL03 |       |       |      | NoAmplification              |
| cmlA1-02   | BAL_CONTROL03 |       |       |      | NoAmplification              |
| cmr        | BAL_CONTROL03 |       |       |      | NoAmplification              |
| cmx(A)     | BAL_CONTRC    | 31.68 | 84.28 | 1.72 |                              |
| cphA-01    | BAL_CONTROL03 |       |       |      | NoAmplification              |
| cphA-02    | BAL_CONTROL03 |       |       |      | NoAmplification              |
| dfrA1      | BAL_CONTROL03 |       |       |      | NoAmplification              |
| dfrA12     | BAL_CONTROL03 |       |       |      | NoAmplification              |
| emrD       | BAL_CONTROL03 |       |       |      | NoAmplification              |
| ereA       | BAL_CONTRC    | 34.61 | 82.47 | 1.94 |                              |
| ereB       | BAL_CONTROL03 |       |       |      | NoAmplification              |
| erm(34)    | BAL_CONTROL03 |       |       |      | NoAmplification              |
| erm(35)    | BAL_CONTROL03 |       |       |      | NoAmplification              |
| erm(36)    | BAL_CONTROL03 |       |       |      | NoAmplification              |
| ermA       | BAL_CONTROL03 |       |       |      | NoAmplification              |
| ermA/ermTR | BAL_CONTROL03 |       |       |      | NoAmplification              |
| ermB       | BAL_CONTROL03 |       |       |      | NoAmplification              |
| ermC       | BAL_CONTROL03 |       |       |      | CurveFitFailed               |
| ermF       | BAL_CONTRC    | 21.46 | 74.72 | 1.99 |                              |
| ermJ/ermD  | BAL_CONTROL03 |       |       |      | NoAmplification              |
| ermK-01    | BAL_CONTROL03 |       |       |      | NoAmplification              |
| ermK-02    | BAL_CONTROL03 |       |       |      | NoAmplification              |
| ermT-01    | BAL_CONTROL03 |       |       |      | NoAmplification              |
| ermT-02    | BAL_CONTROL03 |       |       |      | NoAmplification              |
| ermX       | BAL_CONTRC    | 27.44 | 83.27 | 1.84 |                              |
| ermY       | BAL_CONTROL03 |       |       |      | NoAmplification              |
| fabK       | BAL_CONTRC    | 29.14 | 78.62 | 1.86 |                              |
| floR       | BAL_CONTROL03 |       |       |      | NoAmplification              |
| folA       | BAL_CONTROL03 |       |       |      | NoAmplification              |
| fosB       | BAL_CONTROL03 |       |       |      | LowEfficiency, CtIsSmall, Ci |
| fosX       | BAL_CONTROL03 |       |       |      | NoAmplification              |
| fox5       | BAL_CONTRC    | 32.56 | 86.44 | 1.67 | MultipleMeltPeaks            |
| imiR       | BAL_CONTROL03 |       |       |      | NoAmplification              |
| ImrA-01    | BAL_CONTRC    | 31.96 | 86.69 | 1.98 |                              |
| intl       | BAL_CONTRC    | 31.18 | 84.89 | 1.79 |                              |
| intl1      | BAL_CONTRC    | 22.68 | 87.13 | 1.95 | MultipleMeltPeaks            |
| IS613      | BAL_CONTRC    | 23.21 | 80.31 | 1.76 |                              |
| lnuA-01    | BAL_CONTROL03 |       |       |      | NoAmplification              |
| lnuB-01    | BAL_CONTROL03 |       |       |      | NoAmplification              |
| lnuB-02    | BAL_CONTROL03 |       |       |      | NoAmplification              |

|               |               |       |       |      |                   |
|---------------|---------------|-------|-------|------|-------------------|
| lnuC          | BAL_CONTROL03 |       |       |      | NoAmplification   |
| marR-01       | BAL_CONTROL03 |       |       |      | CurveFitFailed    |
| matA/mel      | BAL_CONTRC    | 25.46 | 77.62 | 2    |                   |
| mdet1         | BAL_CONTROL03 |       |       |      | NoAmplification   |
| mdtA          | BAL_CONTROL03 |       |       |      | CurveFitFailed    |
| mdtE/yhiU     | BAL_CONTROL03 |       |       |      | NoAmplification   |
| mecA          | BAL_CONTROL03 |       |       |      | NoAmplification   |
| mefA          | BAL_CONTRC    | 26.22 | 80.68 | 1.97 |                   |
| mepA          | BAL_CONTRC    | 34.96 | 76.25 | 1.93 | MultipleMeltPeaks |
| mexA          | BAL_CONTROL03 |       |       |      | NoAmplification   |
| mexD          | BAL_CONTROL03 |       |       |      | NoAmplification   |
| mexE          | BAL_CONTROL03 |       |       |      | NoAmplification   |
| mexF          | BAL_CONTRC    | 34.89 | 82.63 | 1.62 |                   |
| mphA-01       | BAL_CONTRC    | 30.07 | 89.13 | 2.01 |                   |
| mphA-02       | BAL_CONTROL03 |       |       |      | NoAmplification   |
| mphB          | BAL_CONTROL03 |       |       |      | NoAmplification   |
| mphC          | BAL_CONTROL03 |       |       |      | NoAmplification   |
| msrA-01       | BAL_CONTROL03 |       |       |      | NoAmplification   |
| msrC-01       | BAL_CONTROL03 |       |       |      | NoAmplification   |
| mtrC-01       | BAL_CONTRC    | 37.05 | 84.37 | 1.68 |                   |
| mtrC-02       | BAL_CONTROL03 |       |       |      | NoAmplification   |
| mtrD-02       | BAL_CONTRC    | 30.91 | 80.86 | 1.93 |                   |
| mtrD-03       | BAL_CONTROL03 |       |       |      | NoAmplification   |
| NDM1          | BAL_CONTROL03 |       |       |      | NoAmplification   |
| nimE          | BAL_CONTROL03 |       |       |      | NoAmplification   |
| nisB          | BAL_CONTROL03 |       |       |      | NoAmplification   |
| oleC          | BAL_CONTROL03 |       |       |      | NoAmplification   |
| oprD          | BAL_CONTRC    | 35.62 | 81.84 | 1.9  |                   |
| oprJ          | BAL_CONTROL03 |       |       |      | NoAmplification   |
| pbp           | BAL_CONTROL03 |       |       |      | NoAmplification   |
| pbp2x         | BAL_CONTROL03 |       |       |      | NoAmplification   |
| Pbp5          | BAL_CONTROL03 |       |       |      | NoAmplification   |
| penA          | BAL_CONTROL03 |       |       |      | NoAmplification   |
| pikR1         | BAL_CONTROL03 |       |       |      | NoAmplification   |
| pikR2         | BAL_CONTRC    | 32.9  | 84.84 | 1.78 |                   |
| pmrA          | BAL_CONTRC    | 26.41 | 78.99 | 1.98 |                   |
| pncA          | BAL_CONTROL03 |       |       |      | NoAmplification   |
| putative mulI | BAL_CONTROL03 |       |       |      | NoAmplification   |
| qac           | BAL_CONTROL03 |       |       |      | NoAmplification   |
| qacA          | BAL_CONTROL03 |       |       |      | NoAmplification   |
| qacA/qacB     | BAL_CONTROL03 |       |       |      | NoAmplification   |
| qacEdelta1-0  | BAL_CONTROL03 |       |       |      | NoAmplification   |
| qacEdelta1-0  | BAL_CONTRC    | 30.39 | 76.43 | 1.89 | MultipleMeltPeaks |
| qacH-01       | BAL_CONTROL03 |       |       |      | NoAmplification   |
| qacH-02       | BAL_CONTRC    | 32.74 | 84.51 | 1.96 |                   |
| qnrA          | BAL_CONTROL03 |       |       |      | NoAmplification   |

|              |               |       |       |                 |
|--------------|---------------|-------|-------|-----------------|
| rarD-02      | BAL_CONTROL03 |       |       | NoAmplification |
| sat4         | BAL_CONTROL03 |       |       | NoAmplification |
| sdeB         | BAL_CONTROL03 |       |       | NoAmplification |
| spcN-01      | BAL_CONTROL03 |       |       | NoAmplification |
| speA         | BAL_CONTROL03 |       |       | NoAmplification |
| str          | BAL_CONTROL03 |       |       | NoAmplification |
| strA         | BAL_CONTROL03 |       |       | NoAmplification |
| strB         | BAL_CONTRC    | 28.28 | 83.94 | 1.9             |
| sul1         | BAL_CONTROL03 |       |       | NoAmplification |
| sul2         | BAL_CONTROL03 |       |       | NoAmplification |
| sulA/foIP-01 | BAL_CONTRC    | 25.58 | 80.76 | 1.95            |
| sulA/foIP-03 | BAL_CONTRC    | 26.46 | 83.5  | 1.95            |
| tet(32)      | BAL_CONTROL03 |       |       | NoAmplification |
| tet(34)      | BAL_CONTRC    | 31.99 | 75.67 | 1.99            |
| tet(35)      | BAL_CONTROL03 |       |       | NoAmplification |
| tet(36)-A    | BAL_CONTROL03 |       |       | NoAmplification |
| tet(36)-B    | BAL_CONTROL03 |       |       | NoAmplification |
| tet(37)      | BAL_CONTRC    | 22.74 | 76.53 | 1.94            |
| tetA-01      | BAL_CONTROL03 |       |       | NoAmplification |
| tetA-02      | BAL_CONTROL03 |       |       | NoAmplification |
| tetB-01      | BAL_CONTRC    | 26.38 | 79.64 | 1.85            |
| tetB-02      | BAL_CONTRC    | 26.95 | 79.54 | 1.96            |
| tetC-01      | BAL_CONTRC    | 28.8  | 74.85 | 1.6             |
| tetC-02      | BAL_CONTRC    | 26.89 | 75.96 | 2               |
| tetD-01      | BAL_CONTROL03 |       |       | NoAmplification |
| tetD-02      | BAL_CONTRC    | 36.8  | 75.46 | 1.92            |
| tetE         | BAL_CONTROL03 |       |       | NoAmplification |
| tetG-01      | BAL_CONTROL03 |       |       | NoAmplification |
| tetG-02      | BAL_CONTROL03 |       |       | NoAmplification |
| tetH         | BAL_CONTROL03 |       |       | NoAmplification |
| tetJ         | BAL_CONTROL03 |       |       | NoAmplification |
| tetK         | BAL_CONTROL03 |       |       | NoAmplification |
| tetL-01      | BAL_CONTROL03 |       |       | NoAmplification |
| tetL-02      | BAL_CONTROL03 |       |       | NoAmplification |
| tetM-01      | BAL_CONTRC    | 26.19 | 75.87 | 1.87            |
| tetM-02      | BAL_CONTRC    | 26.51 | 77.44 | 1.86            |
| tetO-01      | BAL_CONTROL03 |       |       | NoAmplification |
| tetPA        | BAL_CONTROL03 |       |       | NoAmplification |
| tetPB-01     | BAL_CONTROL03 |       |       | NoAmplification |
| tetPB-02     | BAL_CONTRC    | 32.27 | 84.82 | 1.49            |
| tetPB-03     | BAL_CONTROL03 |       |       | NoAmplification |
| tetPB-05     | BAL_CONTROL03 |       |       | NoAmplification |
| tetQ         | BAL_CONTRC    | 20.47 | 76.19 | 1.99            |
| tetR-02      | BAL_CONTROL03 |       |       | NoAmplification |
| tetR-03      | BAL_CONTRC    | 29.4  | 76.13 | 1.96            |
| tetS         | BAL_CONTRC    | 34.37 | 74.34 | 2.05            |

|             |               |       |       |      |                   |
|-------------|---------------|-------|-------|------|-------------------|
| tetT        | BAL_CONTROL03 |       |       |      | NoAmplification   |
| tetU-01     | BAL_CONTROL03 |       |       |      | NoAmplification   |
| tetV        | BAL_CONTROL03 |       |       |      | NoAmplification   |
| tetW-01     | BAL_CONTRC    | 28.77 | 81.26 | 1.7  |                   |
| tetX        | BAL_CONTROL03 |       |       |      | NoAmplification   |
| tnpA-01     | BAL_CONTROL03 |       |       |      | NoAmplification   |
| tnpA-02     | BAL_CONTRC    | 27.15 | 85.03 | 1.75 |                   |
| tnpA-03     | BAL_CONTROL03 |       |       |      | NoAmplification   |
| tnpA-04     | BAL_CONTROL03 |       |       |      | NoAmplification   |
| tnpA-05     | BAL_CONTROL03 |       |       |      | NoAmplification   |
| tnpA-07     | BAL_CONTROL03 |       |       |      | NoAmplification   |
| tolC-01     | BAL_CONTROL03 |       |       |      | CurveFitFailed    |
| tolC-02     | BAL_CONTRC    | 32.82 | 87.98 | 1.92 |                   |
| tolC-03     | BAL_CONTRC    | 32.31 | 86.03 | 1.92 |                   |
| Tp614       | BAL_CONTROL03 |       |       |      | NoAmplification   |
| ttgA        | BAL_CONTROL03 |       |       |      | NoAmplification   |
| ttgB        | BAL_CONTROL03 |       |       |      | CurveFitFailed    |
| vanA        | BAL_CONTROL03 |       |       |      | NoAmplification   |
| vanB-01     | BAL_CONTROL03 |       |       |      | NoAmplification   |
| vanC-01     | BAL_CONTROL03 |       |       |      | NoAmplification   |
| vanC-02     | BAL_CONTROL03 |       |       |      | NoAmplification   |
| vanC-03     | BAL_CONTRC    | 31.38 | 85.98 | 1.52 |                   |
| vanC1       | BAL_CONTROL03 |       |       |      | NoAmplification   |
| vanC2/vanC3 | BAL_CONTRC    | 32.23 | 85.51 | 1.4  | MultipleMeltPeaks |
| vanG        | BAL_CONTROL03 |       |       |      | NoAmplification   |
| vanHB       | BAL_CONTROL03 |       |       |      | NoAmplification   |
| vanHD       | BAL_CONTROL03 |       |       |      | NoAmplification   |
| vanRA-01    | BAL_CONTROL03 |       |       |      | NoAmplification   |
| vanRA-02    | BAL_CONTROL03 |       |       |      | NoAmplification   |
| vanRB       | BAL_CONTROL03 |       |       |      | NoAmplification   |
| vanRC       | BAL_CONTROL03 |       |       |      | NoAmplification   |
| vanRC4      | BAL_CONTROL03 |       |       |      | NoAmplification   |
| vanRD       | BAL_CONTROL03 |       |       |      | NoAmplification   |
| vanSA       | BAL_CONTROL03 |       |       |      | NoAmplification   |
| vanSB       | BAL_CONTROL03 |       |       |      | NoAmplification   |
| vanSC-01    | BAL_CONTROL03 |       |       |      | NoAmplification   |
| vanSC-02    | BAL_CONTROL03 |       |       |      | NoAmplification   |
| vanTC-01    | BAL_CONTROL03 |       |       |      | NoAmplification   |
| vanTC-02    | BAL_CONTROL03 |       |       |      | NoAmplification   |
| vanTE       | BAL_CONTROL03 |       |       |      | NoAmplification   |
| vanTG       | BAL_CONTROL03 |       |       |      | NoAmplification   |
| vanWB       | BAL_CONTROL03 |       |       |      | NoAmplification   |
| vanWG       | BAL_CONTRC    | 34.5  | 74.25 | 1.94 |                   |
| vanXA       | BAL_CONTROL03 |       |       |      | NoAmplification   |
| vanXB       | BAL_CONTROL03 |       |       |      | NoAmplification   |
| vanXD       | BAL_CONTRC    | 30.55 | 75.02 | 1.94 |                   |

|              |               |       |       |      |                 |
|--------------|---------------|-------|-------|------|-----------------|
| vanYB        | BAL_CONTRC    | 33.63 | 84.31 | 1.87 |                 |
| vanYD-01     | BAL_CONTROL03 |       |       |      | CurveFitFailed  |
| vanYD-02     | BAL_CONTROL03 |       |       |      | NoAmplification |
| vatB-01      | BAL_CONTROL03 |       |       |      | NoAmplification |
| vatB-02      | BAL_CONTRC    | 34.41 | 79.92 | 2    |                 |
| vatC-01      | BAL_CONTRC    | 36.7  | 81.47 | 1.82 |                 |
| vatC-02      | BAL_CONTRC    | 37.36 | 86.31 | 1.75 |                 |
| vatE-01      | BAL_CONTRC    | 29.67 | 75.76 | 2.02 |                 |
| vatE-02      | BAL_CONTRC    | 35.73 | 75.71 | 2.03 |                 |
| vgaA-01      | BAL_CONTROL03 |       |       |      | NoAmplification |
| vgaA-02      | BAL_CONTROL03 |       |       |      | NoAmplification |
| vgb-01       | BAL_CONTROL03 |       |       |      | NoAmplification |
| vgbB-01      | BAL_CONTROL03 |       |       |      | NoAmplification |
| vgbB-02      | BAL_CONTROL03 |       |       |      | NoAmplification |
| yceE/mdtG-0  | BAL_CONTROL03 |       |       |      | NoAmplification |
| yceE/mdtG-0  | BAL_CONTROL03 |       |       |      | NoAmplification |
| yceL/mdtH-0  | BAL_CONTRC    | 32.23 | 76.02 | 1.87 |                 |
| yceL/mdtH-0  | BAL_CONTROL03 |       |       |      | NoAmplification |
| yceL/mdtH-0  | BAL_CONTROL03 |       |       |      | NoAmplification |
| yidY/mdtL-01 | BAL_CONTRC    | 31.1  | 82.83 | 1.96 |                 |
| yidY/mdtL-02 | BAL_CONTROL03 |       |       |      | NoAmplification |

| Assay          | Sample        | Ct | Tm    | Efficiency | Flags                  |
|----------------|---------------|----|-------|------------|------------------------|
| 16S rRNA       | BAL_CONTRC    |    | 18.47 | 82.31      | 1.92                   |
| aac            | BAL_CONTRC    |    | 32.85 | 90.15      | 1.61 MultipleMeltPeaks |
| aac(6')-Ib(akz | BAL_CONTROL04 |    |       |            | NoAmplification        |
| aac(6')-Ib(akz | BAL_CONTRC    |    | 34.49 | 86.32      | 1.96 MultipleMeltPeaks |
| aac(6')-Ib(akz | BAL_CONTRC    |    | 39.14 | 76.75      | 1.73                   |
| aac(6')-II     | BAL_CONTROL04 |    |       |            | NoAmplification        |
| aac(6')I1      | BAL_CONTRC    |    | 31.84 | 72.47      | 1.98                   |
| aacA/aphD      | BAL_CONTROL04 |    |       |            | NoAmplification        |
| aacC           | BAL_CONTROL04 |    |       |            | NoAmplification        |
| aacC1          | BAL_CONTROL04 |    |       |            | NoAmplification        |
| aacC2          | BAL_CONTROL04 |    |       |            | NoAmplification        |
| aacC4          | BAL_CONTRC    |    | 35.07 | 78.51      | 1.84                   |
| aadA-01        | BAL_CONTROL04 |    |       |            | NoAmplification        |
| aadA-02        | BAL_CONTROL04 |    |       |            | CurveFitFailed         |
| aadA-1-01      | BAL_CONTROL04 |    |       |            | NoAmplification        |
| aadA-1-02      | BAL_CONTROL04 |    |       |            | NoAmplification        |
| aadA1          | BAL_CONTROL04 |    |       |            | NoAmplification        |
| aadA2-01       | BAL_CONTROL04 |    |       |            | NoAmplification        |
| aadA2-02       | BAL_CONTROL04 |    |       |            | NoAmplification        |
| aadA2-03       | BAL_CONTROL04 |    |       |            | NoAmplification        |
| aadA5-01       | BAL_CONTROL04 |    |       |            | NoAmplification        |
| aadA5-02       | BAL_CONTRC    |    | 33.68 | 77.98      | 2.01                   |
| aadA9-01       | BAL_CONTROL04 |    |       |            | NoAmplification        |
| aadA9-02       | BAL_CONTROL04 |    |       |            | NoAmplification        |
| aadD           | BAL_CONTROL04 |    |       |            | NoAmplification        |
| aadE           | BAL_CONTROL04 |    |       |            | NoAmplification        |
| acrA-01        | BAL_CONTROL04 |    |       |            | NoAmplification        |
| acrA-02        | BAL_CONTROL04 |    |       |            | CurveFitFailed         |
| acrA-03        | BAL_CONTRC    |    | 34.63 | 80.79      | 1.88                   |
| acrA-04        | BAL_CONTRC    |    | 40.09 | 80.42      | 1.69 MultipleMeltPeaks |
| acrA-05        | BAL_CONTRC    |    | 33.48 | 80.14      | 1.94                   |
| acrB-01        | BAL_CONTRC    |    | 28.86 | 81.97      | 1.96                   |
| acrF           | BAL_CONTRC    |    | 30.67 | 83.16      | 1.74                   |
| acrR-01        | BAL_CONTROL04 |    |       |            | NoAmplification        |
| acrR-02        | BAL_CONTROL04 |    |       |            | NoAmplification        |
| Actin          | BAL_CONTRC    |    | 21.99 | 83.58      | 1.91 MultipleMeltPeaks |
| adeA           | BAL_CONTROL04 |    |       |            | NoAmplification        |
| ampC-01        | BAL_CONTRC    |    | 39.97 | 84.75      | 1.73 MultipleMeltPeaks |
| ampC-02        | BAL_CONTROL04 |    |       |            | NoAmplification        |
| ampC-04        | BAL_CONTRC    |    | 39.48 | 76.48      | 1.84 MultipleMeltPeaks |
| ampC-05        | BAL_CONTROL04 |    |       |            | NoAmplification        |
| ampC-06        | BAL_CONTROL04 |    |       |            | NoAmplification        |
| ampC-07        | BAL_CONTRC    |    | 37    | 88.58      | 1.74 MultipleMeltPeaks |
| ampC-09        | BAL_CONTROL04 |    |       |            | NoAmplification        |
| ampC/blaDH     | BAL_CONTRC    |    | 32.98 | 77.22      | 1.99                   |

|                          |               |       |       |      |                   |
|--------------------------|---------------|-------|-------|------|-------------------|
| aph                      | BAL_CONTROL04 |       |       |      | NoAmplification   |
| aph(2')-Id-01            | BAL_CONTROL04 |       |       |      | NoAmplification   |
| aph(2')-Id-02            | BAL_CONTROL04 |       |       |      | NoAmplification   |
| aph6ia                   | BAL_CONTRC    | 30.27 | 78.21 | 1.98 |                   |
| aphA1(aka k <sub>z</sub> | BAL_CONTROL04 |       |       |      | NoAmplification   |
| bacA-01                  | BAL_CONTROL04 |       |       |      | NoAmplification   |
| bacA-02                  | BAL_CONTRC    | 28.13 | 82.71 | 1.77 |                   |
| BETA-globin              | BAL_CONTRC    | 23.51 | 84.31 | 1.95 |                   |
| bla-ACC-1                | BAL_CONTROL04 |       |       |      | NoAmplification   |
| bla-L1                   | BAL_CONTRC    | 33.03 | 80.69 | 1.95 | MultipleMeltPeaks |
| bla1                     | BAL_CONTROL04 |       |       |      | NoAmplification   |
| blaCMY                   | BAL_CONTRC    | 36.5  | 82.6  | 1.85 |                   |
| blaCMY2-01               | BAL_CONTROL04 |       |       |      | NoAmplification   |
| blaCMY2-02               | BAL_CONTRC    | 32.73 | 81.76 | 1.87 | MultipleMeltPeaks |
| blaCTX-M-01              | BAL_CONTROL04 |       |       |      | NoAmplification   |
| blaCTX-M-02              | BAL_CONTROL04 |       |       |      | NoAmplification   |
| blaCTX-M-03              | BAL_CONTROL04 |       |       |      | NoAmplification   |
| blaCTX-M-04              | BAL_CONTROL04 |       |       |      | NoAmplification   |
| blaCTX-M-05              | BAL_CONTRC    | 35.89 | 76.75 | 1.86 |                   |
| blaCTX-M-06              | BAL_CONTROL04 |       |       |      | NoAmplification   |
| blaGES                   | BAL_CONTROL04 |       |       |      | NoAmplification   |
| blaIMP-01                | BAL_CONTROL04 |       |       |      | NoAmplification   |
| blaIMP-02                | BAL_CONTROL04 |       |       |      | NoAmplification   |
| blaMOX/blaC              | BAL_CONTROL04 |       |       |      | NoAmplification   |
| blaOCH                   | BAL_CONTROL04 |       |       |      | NoAmplification   |
| blaOKP                   | BAL_CONTROL04 |       |       |      | NoAmplification   |
| blaOXA1/blaC             | BAL_CONTROL04 |       |       |      | NoAmplification   |
| blaOXA10-01              | BAL_CONTROL04 |       |       |      | NoAmplification   |
| blaOXA10-02              | BAL_CONTROL04 |       |       |      | NoAmplification   |
| blaOXY                   | BAL_CONTROL04 |       |       |      | NoAmplification   |
| blaPAO                   | BAL_CONTROL04 |       |       |      | NoAmplification   |
| blaPER                   | BAL_CONTROL04 |       |       |      | NoAmplification   |
| blaPSE                   | BAL_CONTROL04 |       |       |      | NoAmplification   |
| blaROB                   | BAL_CONTROL04 |       |       |      | NoAmplification   |
| blaSFO                   | BAL_CONTRC    | 34.24 | 82.41 | 1.86 |                   |
| blaSHV-01                | BAL_CONTROL04 |       |       |      | NoAmplification   |
| blaSHV-02                | BAL_CONTROL04 |       |       |      | NoAmplification   |
| blaTEM                   | BAL_CONTROL04 |       |       |      | NoAmplification   |
| blaTLA                   | BAL_CONTROL04 |       |       |      | NoAmplification   |
| blaVEB                   | BAL_CONTROL04 |       |       |      | NoAmplification   |
| blaVIM                   | BAL_CONTROL04 |       |       |      | NoAmplification   |
| blaZ                     | BAL_CONTROL04 |       |       |      | NoAmplification   |
| carB                     | BAL_CONTROL04 |       |       |      | NoAmplification   |
| catA1                    | BAL_CONTROL04 |       |       |      | NoAmplification   |
| catB3                    | BAL_CONTROL04 |       |       |      | NoAmplification   |
| catB8                    | BAL_CONTRC    | 39    | 80.22 | 1.73 |                   |



|            |               |       |       |      |                             |
|------------|---------------|-------|-------|------|-----------------------------|
| ceoA       | BAL_CONTRC    | 31.79 | 82.44 | 1.97 |                             |
| cepA       | BAL_CONTROL04 |       |       |      | NoAmplification             |
| cfiA       | BAL_CONTROL04 |       |       |      | NoAmplification             |
| cfr        | BAL_CONTROL04 |       |       |      | NoAmplification             |
| cfxA       | BAL_CONTRC    | 22.16 | 77.46 | 1.71 |                             |
| cmeA       | BAL_CONTROL04 |       |       |      | NoAmplification             |
| cmlA1-01   | BAL_CONTROL04 |       |       |      | NoAmplification             |
| cmlA1-02   | BAL_CONTROL04 |       |       |      | NoAmplification             |
| cmr        | BAL_CONTROL04 |       |       |      | NoAmplification             |
| cmx(A)     | BAL_CONTRC    | 32.64 | 86.52 | 1.91 |                             |
| cphA-01    | BAL_CONTROL04 |       |       |      | NoAmplification             |
| cphA-02    | BAL_CONTRC    | 31.05 | 76.85 | 1.93 |                             |
| dfrA1      | BAL_CONTROL04 |       |       |      | NoAmplification             |
| dfrA12     | BAL_CONTROL04 |       |       |      | NoAmplification             |
| emrD       | BAL_CONTROL04 |       |       |      | NoAmplification             |
| ereA       | BAL_CONTROL04 |       |       |      | NoAmplification             |
| ereB       | BAL_CONTRC    | 38.22 | 85.9  | 1.78 |                             |
| erm(34)    | BAL_CONTROL04 |       |       |      | NoAmplification             |
| erm(35)    | BAL_CONTROL04 |       |       |      | NoAmplification             |
| erm(36)    | BAL_CONTROL04 |       |       |      | NoAmplification             |
| ermA       | BAL_CONTROL04 |       |       |      | NoAmplification             |
| ermA/ermTR | BAL_CONTROL04 |       |       |      | NoAmplification             |
| ermB       | BAL_CONTROL04 |       |       |      | NoAmplification             |
| ermC       | BAL_CONTROL04 |       |       |      | NoAmplification             |
| ermF       | BAL_CONTROL04 |       |       |      | NoAmplification             |
| ermJ/ermD  | BAL_CONTROL04 |       |       |      | NoAmplification             |
| ermK-01    | BAL_CONTROL04 |       |       |      | NoAmplification             |
| ermK-02    | BAL_CONTROL04 |       |       |      | NoAmplification             |
| ermT-01    | BAL_CONTROL04 |       |       |      | NoAmplification             |
| ermT-02    | BAL_CONTROL04 |       |       |      | NoAmplification             |
| ermX       | BAL_CONTROL04 |       |       |      | NoAmplification             |
| ermY       | BAL_CONTROL04 |       |       |      | NoAmplification             |
| fabK       | BAL_CONTRC    | 28.37 | 78.7  | 2.03 |                             |
| floR       | BAL_CONTROL04 |       |       |      | NoAmplification             |
| folA       | BAL_CONTROL04 |       |       |      | NoAmplification             |
| fosB       | BAL_CONTROL04 |       |       |      | LowEfficiency, CtlSmall, S: |
| fosX       | BAL_CONTROL04 |       |       |      | NoAmplification             |
| fox5       | BAL_CONTRC    | 32.95 | 86.32 | 1.75 |                             |
| imiR       | BAL_CONTROL04 |       |       |      | NoAmplification             |
| ImrA-01    | BAL_CONTRC    | 35.61 | 82.81 | 1.93 |                             |
| intl       | BAL_CONTRC    | 35.08 | 81.07 | 1.9  | MultipleMeltPeaks           |
| intl1      | BAL_CONTRC    | 22.54 | 87.27 | 1.98 |                             |
| IS613      | BAL_CONTRC    | 22.44 | 79.6  | 1.81 |                             |
| lnuA-01    | BAL_CONTROL04 |       |       |      | NoAmplification             |
| lnuB-01    | BAL_CONTROL04 |       |       |      | NoAmplification             |
| lnuB-02    | BAL_CONTROL04 |       |       |      | NoAmplification             |

|               |               |       |       |      |                   |
|---------------|---------------|-------|-------|------|-------------------|
| lnuC          | BAL_CONTROL04 |       |       |      | NoAmplification   |
| marR-01       | BAL_CONTRC    | 35.44 | 85.55 | 1.88 |                   |
| matA/mel      | BAL_CONTRC    | 23.83 | 77.78 | 2.05 |                   |
| mdet1         | BAL_CONTROL04 |       |       |      | NoAmplification   |
| mdtA          | BAL_CONTROL04 |       |       |      | NoAmplification   |
| mdtE/yhiU     | BAL_CONTROL04 |       |       |      | NoAmplification   |
| mecA          | BAL_CONTROL04 |       |       |      | NoAmplification   |
| mefA          | BAL_CONTRC    | 23.39 | 80.69 | 1.98 |                   |
| mepA          | BAL_CONTROL04 |       |       |      | NoAmplification   |
| mexA          | BAL_CONTROL04 |       |       |      | NoAmplification   |
| mexD          | BAL_CONTRC    | 37.31 | 79.73 | 1.87 |                   |
| mexE          | BAL_CONTROL04 |       |       |      | NoAmplification   |
| mexF          | BAL_CONTRC    | 34.88 | 82.01 | 1.9  | MultipleMeltPeaks |
| mphA-01       | BAL_CONTRC    | 30.98 | 89.14 | 1.95 |                   |
| mphA-02       | BAL_CONTRC    | 35.75 | 82.84 | 1.72 | MultipleMeltPeaks |
| mphB          | BAL_CONTROL04 |       |       |      | NoAmplification   |
| mphC          | BAL_CONTROL04 |       |       |      | NoAmplification   |
| msrA-01       | BAL_CONTROL04 |       |       |      | NoAmplification   |
| msrC-01       | BAL_CONTROL04 |       |       |      | NoAmplification   |
| mtrC-01       | BAL_CONTROL04 |       |       |      | NoAmplification   |
| mtrC-02       | BAL_CONTROL04 |       |       |      | NoAmplification   |
| mtrD-02       | BAL_CONTRC    | 31.29 | 81.05 | 1.92 |                   |
| mtrD-03       | BAL_CONTROL04 |       |       |      | NoAmplification   |
| NDM1          | BAL_CONTROL04 |       |       |      | NoAmplification   |
| nimE          | BAL_CONTROL04 |       |       |      | NoAmplification   |
| nisB          | BAL_CONTROL04 |       |       |      | NoAmplification   |
| oleC          | BAL_CONTRC    | 34.15 | 82.23 | 1.9  |                   |
| oprD          | BAL_CONTRC    | 36.08 | 81.72 | 1.89 | MultipleMeltPeaks |
| oprJ          | BAL_CONTROL04 |       |       |      | NoAmplification   |
| pbp           | BAL_CONTROL04 |       |       |      | NoAmplification   |
| pbp2x         | BAL_CONTROL04 |       |       |      | NoAmplification   |
| Pbp5          | BAL_CONTROL04 |       |       |      | NoAmplification   |
| penA          | BAL_CONTROL04 |       |       |      | NoAmplification   |
| pikR1         | BAL_CONTROL04 |       |       |      | NoAmplification   |
| pikR2         | BAL_CONTRC    | 31.73 | 85.29 | 1.87 |                   |
| pmrA          | BAL_CONTRC    | 24.85 | 79.15 | 2.02 |                   |
| pncA          | BAL_CONTROL04 |       |       |      | NoAmplification   |
| putative mulI | BAL_CONTROL04 |       |       |      | NoAmplification   |
| qac           | BAL_CONTROL04 |       |       |      | NoAmplification   |
| qacA          | BAL_CONTROL04 |       |       |      | NoAmplification   |
| qacA/qacB     | BAL_CONTROL04 |       |       |      | NoAmplification   |
| qacEdelta1-0  | BAL_CONTROL04 |       |       |      | NoAmplification   |
| qacEdelta1-0  | BAL_CONTRC    | 30.24 | 76.61 | 1.92 |                   |
| qacH-01       | BAL_CONTROL04 |       |       |      | CurveFitFailed    |
| qacH-02       | BAL_CONTROL04 |       |       |      | NoAmplification   |
| qnrA          | BAL_CONTROL04 |       |       |      | NoAmplification   |

|              |               |       |       |      |                   |
|--------------|---------------|-------|-------|------|-------------------|
| rarD-02      | BAL_CONTROL04 |       |       |      | NoAmplification   |
| sat4         | BAL_CONTROL04 |       |       |      | NoAmplification   |
| sdeB         | BAL_CONTROL04 |       |       |      | NoAmplification   |
| spcN-01      | BAL_CONTROL04 |       |       |      | NoAmplification   |
| speA         | BAL_CONTROL04 |       |       |      | NoAmplification   |
| str          | BAL_CONTROL04 |       |       |      | NoAmplification   |
| strA         | BAL_CONTROL04 |       |       |      | NoAmplification   |
| strB         | BAL_CONTROL04 |       |       |      | NoAmplification   |
| sul1         | BAL_CONTROL04 |       |       |      | NoAmplification   |
| sul2         | BAL_CONTROL04 |       |       |      | NoAmplification   |
| sulA/foIP-01 | BAL_CONTRC    | 24.13 | 80.87 | 1.97 |                   |
| sulA/foIP-03 | BAL_CONTRC    | 23.59 | 83.17 | 2.01 |                   |
| tet(32)      | BAL_CONTRC    | 25.39 | 81.06 | 1.9  |                   |
| tet(34)      | BAL_CONTRC    | 32.4  | 75.28 | 1.97 |                   |
| tet(35)      | BAL_CONTROL04 |       |       |      | NoAmplification   |
| tet(36)-A    | BAL_CONTROL04 |       |       |      | NoAmplification   |
| tet(36)-B    | BAL_CONTROL04 |       |       |      | NoAmplification   |
| tet(37)      | BAL_CONTRC    | 24.27 | 76.5  | 1.96 |                   |
| tetA-01      | BAL_CONTROL04 |       |       |      | NoAmplification   |
| tetA-02      | BAL_CONTRC    | 41.24 | 87.09 | 1.7  | MultipleMeltPeaks |
| tetB-01      | BAL_CONTROL04 |       |       |      | NoAmplification   |
| tetB-02      | BAL_CONTROL04 |       |       |      | NoAmplification   |
| tetC-01      | BAL_CONTROL04 |       |       |      | NoAmplification   |
| tetC-02      | BAL_CONTROL04 |       |       |      | NoAmplification   |
| tetD-01      | BAL_CONTROL04 |       |       |      | NoAmplification   |
| tetD-02      | BAL_CONTRC    | 32.9  | 77.38 | 1.94 |                   |
| tetE         | BAL_CONTROL04 |       |       |      | NoAmplification   |
| tetG-01      | BAL_CONTROL04 |       |       |      | NoAmplification   |
| tetG-02      | BAL_CONTROL04 |       |       |      | NoAmplification   |
| tetH         | BAL_CONTROL04 |       |       |      | NoAmplification   |
| tetJ         | BAL_CONTROL04 |       |       |      | NoAmplification   |
| tetK         | BAL_CONTROL04 |       |       |      | NoAmplification   |
| tetL-01      | BAL_CONTROL04 |       |       |      | NoAmplification   |
| tetL-02      | BAL_CONTROL04 |       |       |      | NoAmplification   |
| tetM-01      | BAL_CONTRC    | 25.97 | 75.89 | 1.91 |                   |
| tetM-02      | BAL_CONTRC    | 25.79 | 77.5  | 1.96 |                   |
| tetO-01      | BAL_CONTROL04 |       |       |      | NoAmplification   |
| tetPA        | BAL_CONTROL04 |       |       |      | NoAmplification   |
| tetPB-01     | BAL_CONTROL04 |       |       |      | NoAmplification   |
| tetPB-02     | BAL_CONTRC    | 32.93 | 84.68 | 1.71 |                   |
| tetPB-03     | BAL_CONTROL04 |       |       |      | NoAmplification   |
| tetPB-05     | BAL_CONTROL04 |       |       |      | NoAmplification   |
| tetQ         | BAL_CONTRC    | 21.37 | 76.01 | 2    |                   |
| tetR-02      | BAL_CONTROL04 |       |       |      | NoAmplification   |
| tetR-03      | BAL_CONTROL04 |       |       |      | NoAmplification   |
| tetS         | BAL_CONTROL04 |       |       |      | NoAmplification   |

|             |               |       |       |      |                             |
|-------------|---------------|-------|-------|------|-----------------------------|
| tetT        | BAL_CONTROL04 |       |       |      | NoAmplification             |
| tetU-01     | BAL_CONTROL04 |       |       |      | CurveFitFailed              |
| tetV        | BAL_CONTROL04 |       |       |      | NoAmplification             |
| tetW-01     | BAL_CONTRC    | 27.81 | 81.3  | 1.85 |                             |
| tetX        | BAL_CONTROL04 |       |       |      | NoAmplification             |
| tnpA-01     | BAL_CONTROL04 |       |       |      | NoAmplification             |
| tnpA-02     | BAL_CONTROL04 |       |       |      | NoAmplification             |
| tnpA-03     | BAL_CONTRC    | 32.08 | 75.16 | 2.03 |                             |
| tnpA-04     | BAL_CONTROL04 |       |       |      | NoAmplification             |
| tnpA-05     | BAL_CONTROL04 |       |       |      | NoAmplification             |
| tnpA-07     | BAL_CONTROL04 |       |       |      | NoAmplification             |
| tolC-01     | BAL_CONTRC    | 29.64 | 78.68 | 1.94 |                             |
| tolC-02     | BAL_CONTRC    | 31.27 | 83.88 | 1.92 |                             |
| tolC-03     | BAL_CONTRC    | 36.46 | 81.61 | 1.82 | MultipleMeltPeaks           |
| Tp614       | BAL_CONTROL04 |       |       |      | NoAmplification             |
| ttgA        | BAL_CONTRC    | 33.43 | 83.55 | 1.93 |                             |
| ttgB        | BAL_CONTRC    | 39.12 | 62.64 | 1.76 | MultipleMeltPeaks           |
| vanA        | BAL_CONTROL04 |       |       |      | NoAmplification             |
| vanB-01     | BAL_CONTROL04 |       |       |      | LowEfficiency, CurveFitFail |
| vanC-01     | BAL_CONTROL04 |       |       |      | NoAmplification             |
| vanC-02     | BAL_CONTROL04 |       |       |      | NoAmplification             |
| vanC-03     | BAL_CONTRC    | 31.29 | 78.73 | 1.89 |                             |
| vanC1       | BAL_CONTROL04 |       |       |      | NoAmplification             |
| vanC2/vanC3 | BAL_CONTRC    | 33.2  | 88.43 | 1.54 |                             |
| vanG        | BAL_CONTROL04 |       |       |      | NoAmplification             |
| vanHB       | BAL_CONTROL04 |       |       |      | NoAmplification             |
| vanHD       | BAL_CONTROL04 |       |       |      | NoAmplification             |
| vanRA-01    | BAL_CONTROL04 |       |       |      | NoAmplification             |
| vanRA-02    | BAL_CONTROL04 |       |       |      | NoAmplification             |
| vanRB       | BAL_CONTROL04 |       |       |      | NoAmplification             |
| vanRC       | BAL_CONTROL04 |       |       |      | NoAmplification             |
| vanRC4      | BAL_CONTROL04 |       |       |      | NoAmplification             |
| vanRD       | BAL_CONTROL04 |       |       |      | NoAmplification             |
| vanSA       | BAL_CONTROL04 |       |       |      | NoAmplification             |
| vanSB       | BAL_CONTROL04 |       |       |      | NoAmplification             |
| vanSC-01    | BAL_CONTROL04 |       |       |      | NoAmplification             |
| vanSC-02    | BAL_CONTROL04 |       |       |      | NoAmplification             |
| vanTC-01    | BAL_CONTROL04 |       |       |      | NoAmplification             |
| vanTC-02    | BAL_CONTROL04 |       |       |      | NoAmplification             |
| vanTE       | BAL_CONTROL04 |       |       |      | NoAmplification             |
| vanTG       | BAL_CONTROL04 |       |       |      | NoAmplification             |
| vanWB       | BAL_CONTROL04 |       |       |      | NoAmplification             |
| vanWG       | BAL_CONTRC    | 38.15 | 74.34 | 1.84 |                             |
| vanXA       | BAL_CONTROL04 |       |       |      | NoAmplification             |
| vanXB       | BAL_CONTROL04 |       |       |      | NoAmplification             |
| vanXD       | BAL_CONTRC    | 29.63 | 74.79 | 1.95 |                             |

|              |               |       |       |      |                 |
|--------------|---------------|-------|-------|------|-----------------|
| vanYB        | BAL_CONTRC    | 36.89 | 83.71 | 1.86 |                 |
| vanYD-01     | BAL_CONTROL04 |       |       |      | CurveFitFailed  |
| vanYD-02     | BAL_CONTROL04 |       |       |      | NoAmplification |
| vatB-01      | BAL_CONTROL04 |       |       |      | NoAmplification |
| vatB-02      | BAL_CONTROL04 |       |       |      | NoAmplification |
| vatC-01      | BAL_CONTROL04 |       |       |      | NoAmplification |
| vatC-02      | BAL_CONTRC    | 36.56 | 86.63 | 1.8  |                 |
| vatE-01      | BAL_CONTRC    | 30.61 | 76.57 | 2.03 |                 |
| vatE-02      | BAL_CONTROL04 |       |       |      | NoAmplification |
| vgaA-01      | BAL_CONTROL04 |       |       |      | NoAmplification |
| vgaA-02      | BAL_CONTROL04 |       |       |      | NoAmplification |
| vgb-01       | BAL_CONTROL04 |       |       |      | NoAmplification |
| vgbB-01      | BAL_CONTROL04 |       |       |      | NoAmplification |
| vgbB-02      | BAL_CONTROL04 |       |       |      | NoAmplification |
| yceE/mdtG-0  | BAL_CONTROL04 |       |       |      | NoAmplification |
| yceE/mdtG-0  | BAL_CONTROL04 |       |       |      | NoAmplification |
| yceL/mdtH-0  | BAL_CONTROL04 |       |       |      | CurveFitFailed  |
| yceL/mdtH-0  | BAL_CONTROL04 |       |       |      | NoAmplification |
| yceL/mdtH-0  | BAL_CONTRC    | 28.63 | 79.8  | 1.98 |                 |
| yidY/mdtL-01 | BAL_CONTRC    | 35.91 | 77.54 | 1.88 |                 |
| yidY/mdtL-02 | BAL_CONTRC    | 28.56 | 79.91 | 1.93 |                 |

| Assay          | Sample        | Ct | Tm    | Efficiency | Flags                  |
|----------------|---------------|----|-------|------------|------------------------|
| 16S rRNA       | BAL_CONTRC    |    | 19.22 | 82.15      | 1.89                   |
| aac            | BAL_CONTROL05 |    |       |            | NoAmplification        |
| aac(6')-Ib(akz | BAL_CONTROL05 |    |       |            | NoAmplification        |
| aac(6')-Ib(akz | BAL_CONTRC    |    | 31.61 | 78.99      | 1.84 MultipleMeltPeaks |
| aac(6')-Ib(akz | BAL_CONTROL05 |    |       |            | NoAmplification        |
| aac(6')-II     | BAL_CONTROL05 |    |       |            | NoAmplification        |
| aac(6')I1      | BAL_CONTROL05 |    |       |            | NoAmplification        |
| aacA/aphD      | BAL_CONTROL05 |    |       |            | NoAmplification        |
| aacC           | BAL_CONTROL05 |    |       |            | NoAmplification        |
| aacC1          | BAL_CONTROL05 |    |       |            | NoAmplification        |
| aacC2          | BAL_CONTROL05 |    |       |            | NoAmplification        |
| aacC4          | BAL_CONTROL05 |    |       |            | NoAmplification        |
| aadA-01        | BAL_CONTROL05 |    |       |            | NoAmplification        |
| aadA-02        | BAL_CONTROL05 |    |       |            | NoAmplification        |
| aadA-1-01      | BAL_CONTROL05 |    |       |            | NoAmplification        |
| aadA-1-02      | BAL_CONTROL05 |    |       |            | NoAmplification        |
| aadA1          | BAL_CONTROL05 |    |       |            | NoAmplification        |
| aadA2-01       | BAL_CONTROL05 |    |       |            | NoAmplification        |
| aadA2-02       | BAL_CONTROL05 |    |       |            | NoAmplification        |
| aadA2-03       | BAL_CONTROL05 |    |       |            | NoAmplification        |
| aadA5-01       | BAL_CONTROL05 |    |       |            | NoAmplification        |
| aadA5-02       | BAL_CONTROL05 |    |       |            | NoAmplification        |
| aadA9-01       | BAL_CONTROL05 |    |       |            | NoAmplification        |
| aadA9-02       | BAL_CONTROL05 |    |       |            | NoAmplification        |
| aadD           | BAL_CONTROL05 |    |       |            | NoAmplification        |
| aadE           | BAL_CONTROL05 |    |       |            | NoAmplification        |
| acrA-01        | BAL_CONTROL05 |    |       |            | NoAmplification        |
| acrA-02        | BAL_CONTROL05 |    |       |            | NoAmplification        |
| acrA-03        | BAL_CONTROL05 |    |       |            | NoAmplification        |
| acrA-04        | BAL_CONTROL05 |    |       |            | NoAmplification        |
| acrA-05        | BAL_CONTRC    |    | 31.44 | 79.96      | 1.85 MultipleMeltPeaks |
| acrB-01        | BAL_CONTROL05 |    |       |            | NoAmplification        |
| acrF           | BAL_CONTROL05 |    |       |            | NoAmplification        |
| acrR-01        | BAL_CONTROL05 |    |       |            | NoAmplification        |
| acrR-02        | BAL_CONTROL05 |    |       |            | NoAmplification        |
| Actin          | BAL_CONTRC    |    | 18.58 | 87.21      | 1.69 MultipleMeltPeaks |
| adeA           | BAL_CONTROL05 |    |       |            | NoAmplification        |
| ampC-01        | BAL_CONTROL05 |    |       |            | NoAmplification        |
| ampC-02        | BAL_CONTROL05 |    |       |            | NoAmplification        |
| ampC-04        | BAL_CONTROL05 |    |       |            | NoAmplification        |
| ampC-05        | BAL_CONTROL05 |    |       |            | NoAmplification        |
| ampC-06        | BAL_CONTROL05 |    |       |            | NoAmplification        |
| ampC-07        | BAL_CONTROL05 |    |       |            | NoAmplification        |
| ampC-09        | BAL_CONTROL05 |    |       |            | NoAmplification        |
| ampC/blaDH     | BAL_CONTRC    |    | 30.64 | 88.54      | 1.78                   |

|                          |               |       |       |      |                   |
|--------------------------|---------------|-------|-------|------|-------------------|
| aph                      | BAL_CONTROL05 |       |       |      | NoAmplification   |
| aph(2')-Id-01            | BAL_CONTROL05 |       |       |      | NoAmplification   |
| aph(2')-Id-02            | BAL_CONTROL05 |       |       |      | NoAmplification   |
| aph6ia                   | BAL_CONTROL05 |       |       |      | NoAmplification   |
| aphA1(aka k <sub>z</sub> | BAL_CONTROL05 |       |       |      | NoAmplification   |
| bacA-01                  | BAL_CONTROL05 |       |       |      | NoAmplification   |
| bacA-02                  | BAL_CONTROL05 |       |       |      | NoAmplification   |
| BETA-globin              | BAL_CONTRC    | 19.45 | 84.25 | 1.84 |                   |
| bla-ACC-1                | BAL_CONTROL05 |       |       |      | NoAmplification   |
| bla-L1                   | BAL_CONTRC    | 31.36 | 82.88 | 1.85 |                   |
| bla1                     | BAL_CONTROL05 |       |       |      | NoAmplification   |
| blaCMY                   | BAL_CONTROL05 |       |       |      | NoAmplification   |
| blaCMY2-01               | BAL_CONTROL05 |       |       |      | NoAmplification   |
| blaCMY2-02               | BAL_CONTRC    | 29.74 | 86.89 | 1.77 | MultipleMeltPeaks |
| blaCTX-M-01              | BAL_CONTROL05 |       |       |      | NoAmplification   |
| blaCTX-M-02              | BAL_CONTROL05 |       |       |      | NoAmplification   |
| blaCTX-M-03              | BAL_CONTROL05 |       |       |      | NoAmplification   |
| blaCTX-M-04              | BAL_CONTROL05 |       |       |      | NoAmplification   |
| blaCTX-M-05              | BAL_CONTROL05 |       |       |      | NoAmplification   |
| blaCTX-M-06              | BAL_CONTROL05 |       |       |      | NoAmplification   |
| blaGES                   | BAL_CONTROL05 |       |       |      | NoAmplification   |
| blaIMP-01                | BAL_CONTROL05 |       |       |      | NoAmplification   |
| blaIMP-02                | BAL_CONTROL05 |       |       |      | NoAmplification   |
| blaMOX/blaC              | BAL_CONTROL05 |       |       |      | NoAmplification   |
| blaOCH                   | BAL_CONTROL05 |       |       |      | NoAmplification   |
| blaOKP                   | BAL_CONTROL05 |       |       |      | NoAmplification   |
| blaOXA1/blaC             | BAL_CONTROL05 |       |       |      | NoAmplification   |
| blaOXA10-01              | BAL_CONTROL05 |       |       |      | NoAmplification   |
| blaOXA10-02              | BAL_CONTROL05 |       |       |      | NoAmplification   |
| blaOXY                   | BAL_CONTROL05 |       |       |      | NoAmplification   |
| blaPAO                   | BAL_CONTROL05 |       |       |      | NoAmplification   |
| blaPER                   | BAL_CONTROL05 |       |       |      | NoAmplification   |
| blaPSE                   | BAL_CONTROL05 |       |       |      | NoAmplification   |
| blaROB                   | BAL_CONTROL05 |       |       |      | NoAmplification   |
| blaSFO                   | BAL_CONTROL05 |       |       |      | NoAmplification   |
| blaSHV-01                | BAL_CONTROL05 |       |       |      | NoAmplification   |
| blaSHV-02                | BAL_CONTROL05 |       |       |      | NoAmplification   |
| blaTEM                   | BAL_CONTROL05 |       |       |      | NoAmplification   |
| blaTLA                   | BAL_CONTROL05 |       |       |      | NoAmplification   |
| blaVEB                   | BAL_CONTROL05 |       |       |      | NoAmplification   |
| blaVIM                   | BAL_CONTROL05 |       |       |      | NoAmplification   |
| blaZ                     | BAL_CONTROL05 |       |       |      | NoAmplification   |
| carB                     | BAL_CONTROL05 |       |       |      | NoAmplification   |
| catA1                    | BAL_CONTROL05 |       |       |      | NoAmplification   |
| catB3                    | BAL_CONTROL05 |       |       |      | NoAmplification   |
| catB8                    | BAL_CONTRC    | 30.63 | 82.66 | 1.89 |                   |

|            |               |       |       |      |                   |
|------------|---------------|-------|-------|------|-------------------|
| ceoA       | BAL_CONTRC    | 28.72 | 89.62 | 1.94 | MultipleMeltPeaks |
| cepA       | BAL_CONTROL05 |       |       |      | NoAmplification   |
| cfiA       | BAL_CONTROL05 |       |       |      | NoAmplification   |
| cfr        | BAL_CONTROL05 |       |       |      | NoAmplification   |
| cfxA       | BAL_CONTRC    | 19.64 | 77.42 | 1.52 |                   |
| cmeA       | BAL_CONTROL05 |       |       |      | NoAmplification   |
| cmlA1-01   | BAL_CONTROL05 |       |       |      | NoAmplification   |
| cmlA1-02   | BAL_CONTROL05 |       |       |      | NoAmplification   |
| cmr        | BAL_CONTROL05 |       |       |      | NoAmplification   |
| cmx(A)     | BAL_CONTROL05 |       |       |      | NoAmplification   |
| cphA-01    | BAL_CONTROL05 |       |       |      | NoAmplification   |
| cphA-02    | BAL_CONTROL05 |       |       |      | NoAmplification   |
| dfrA1      | BAL_CONTROL05 |       |       |      | NoAmplification   |
| dfrA12     | BAL_CONTROL05 |       |       |      | NoAmplification   |
| emrD       | BAL_CONTROL05 |       |       |      | NoAmplification   |
| ereA       | BAL_CONTROL05 |       |       |      | NoAmplification   |
| ereB       | BAL_CONTROL05 |       |       |      | NoAmplification   |
| erm(34)    | BAL_CONTROL05 |       |       |      | NoAmplification   |
| erm(35)    | BAL_CONTROL05 |       |       |      | NoAmplification   |
| erm(36)    | BAL_CONTROL05 |       |       |      | NoAmplification   |
| ermA       | BAL_CONTROL05 |       |       |      | NoAmplification   |
| ermA/ermTR | BAL_CONTROL05 |       |       |      | NoAmplification   |
| ermB       | BAL_CONTRC    | 25.53 | 74.75 | 1.74 |                   |
| ermC       | BAL_CONTROL05 |       |       |      | NoAmplification   |
| ermF       | BAL_CONTRC    | 21.81 | 74.44 | 1.89 |                   |
| ermJ/ermD  | BAL_CONTROL05 |       |       |      | NoAmplification   |
| ermK-01    | BAL_CONTROL05 |       |       |      | NoAmplification   |
| ermK-02    | BAL_CONTROL05 |       |       |      | NoAmplification   |
| ermT-01    | BAL_CONTROL05 |       |       |      | NoAmplification   |
| ermT-02    | BAL_CONTROL05 |       |       |      | NoAmplification   |
| ermX       | BAL_CONTROL05 |       |       |      | NoAmplification   |
| ermY       | BAL_CONTROL05 |       |       |      | NoAmplification   |
| fabK       | BAL_CONTROL05 |       |       |      | NoAmplification   |
| floR       | BAL_CONTROL05 |       |       |      | NoAmplification   |
| folA       | BAL_CONTROL05 |       |       |      | NoAmplification   |
| fosB       | BAL_CONTROL05 |       |       |      | NoAmplification   |
| fosX       | BAL_CONTROL05 |       |       |      | NoAmplification   |
| fox5       | BAL_CONTROL05 |       |       |      | NoAmplification   |
| imiR       | BAL_CONTROL05 |       |       |      | NoAmplification   |
| ImrA-01    | BAL_CONTROL05 |       |       |      | NoAmplification   |
| intl       | BAL_CONTROL05 |       |       |      | NoAmplification   |
| intl1      | BAL_CONTRC    | 20.82 | 87.66 | 1.76 |                   |
| IS613      | BAL_CONTRC    | 19.83 | 80.34 | 1.63 |                   |
| lnuA-01    | BAL_CONTROL05 |       |       |      | NoAmplification   |
| lnuB-01    | BAL_CONTROL05 |       |       |      | NoAmplification   |
| lnuB-02    | BAL_CONTROL05 |       |       |      | NoAmplification   |



|               |               |       |       |      |                   |
|---------------|---------------|-------|-------|------|-------------------|
| lnuC          | BAL_CONTROL05 |       |       |      | NoAmplification   |
| marR-01       | BAL_CONTROL05 |       |       |      | NoAmplification   |
| matA/mel      | BAL_CONTRC    | 24.03 | 77.46 | 1.88 |                   |
| mdet1         | BAL_CONTROL05 |       |       |      | NoAmplification   |
| mdtA          | BAL_CONTROL05 |       |       |      | NoAmplification   |
| mdtE/yhiU     | BAL_CONTROL05 |       |       |      | NoAmplification   |
| mecA          | BAL_CONTROL05 |       |       |      | NoAmplification   |
| mefA          | BAL_CONTRC    | 23.72 | 80.53 | 1.86 |                   |
| mepA          | BAL_CONTRC    | 29.7  | 78.23 | 1.84 | MultipleMeltPeaks |
| mexA          | BAL_CONTROL05 |       |       |      | NoAmplification   |
| mexD          | BAL_CONTROL05 |       |       |      | NoAmplification   |
| mexE          | BAL_CONTROL05 |       |       |      | NoAmplification   |
| mexF          | BAL_CONTROL05 |       |       |      | NoAmplification   |
| mphA-01       | BAL_CONTRC    | 30.38 | 89.03 | 1.94 |                   |
| mphA-02       | BAL_CONTROL05 |       |       |      | NoAmplification   |
| mphB          | BAL_CONTROL05 |       |       |      | NoAmplification   |
| mphC          | BAL_CONTROL05 |       |       |      | NoAmplification   |
| msrA-01       | BAL_CONTROL05 |       |       |      | NoAmplification   |
| msrC-01       | BAL_CONTROL05 |       |       |      | NoAmplification   |
| mtrC-01       | BAL_CONTROL05 |       |       |      | NoAmplification   |
| mtrC-02       | BAL_CONTROL05 |       |       |      | NoAmplification   |
| mtrD-02       | BAL_CONTRC    | 30.22 | 82.26 | 1.79 |                   |
| mtrD-03       | BAL_CONTROL05 |       |       |      | NoAmplification   |
| NDM1          | BAL_CONTROL05 |       |       |      | NoAmplification   |
| nimE          | BAL_CONTROL05 |       |       |      | NoAmplification   |
| nisB          | BAL_CONTROL05 |       |       |      | NoAmplification   |
| oleC          | BAL_CONTROL05 |       |       |      | NoAmplification   |
| oprD          | BAL_CONTRC    | 30.01 | 81.64 | 1.9  | MultipleMeltPeaks |
| oprJ          | BAL_CONTROL05 |       |       |      | NoAmplification   |
| pbp           | BAL_CONTROL05 |       |       |      | NoAmplification   |
| pbp2x         | BAL_CONTROL05 |       |       |      | NoAmplification   |
| Pbp5          | BAL_CONTROL05 |       |       |      | NoAmplification   |
| penA          | BAL_CONTROL05 |       |       |      | NoAmplification   |
| pikR1         | BAL_CONTROL05 |       |       |      | NoAmplification   |
| pikR2         | BAL_CONTROL05 |       |       |      | NoAmplification   |
| pmrA          | BAL_CONTRC    | 26.81 | 79.51 | 1.82 |                   |
| pncA          | BAL_CONTROL05 |       |       |      | NoAmplification   |
| putative mulI | BAL_CONTROL05 |       |       |      | NoAmplification   |
| qac           | BAL_CONTROL05 |       |       |      | NoAmplification   |
| qacA          | BAL_CONTROL05 |       |       |      | NoAmplification   |
| qacA/qacB     | BAL_CONTROL05 |       |       |      | NoAmplification   |
| qacEdelta1-0  | BAL_CONTROL05 |       |       |      | NoAmplification   |
| qacEdelta1-0  | BAL_CONTROL05 |       |       |      | NoAmplification   |
| qacH-01       | BAL_CONTROL05 |       |       |      | NoAmplification   |
| qacH-02       | BAL_CONTROL05 |       |       |      | NoAmplification   |
| qnrA          | BAL_CONTROL05 |       |       |      | NoAmplification   |

|              |               |       |       |                            |
|--------------|---------------|-------|-------|----------------------------|
| rarD-02      | BAL_CONTROL05 |       |       | NoAmplification            |
| sat4         | BAL_CONTROL05 |       |       | NoAmplification            |
| sdeB         | BAL_CONTROL05 |       |       | NoAmplification            |
| spcN-01      | BAL_CONTROL05 |       |       | NoAmplification            |
| speA         | BAL_CONTROL05 |       |       | NoAmplification            |
| str          | BAL_CONTROL05 |       |       | NoAmplification            |
| strA         | BAL_CONTROL05 |       |       | NoAmplification            |
| strB         | BAL_CONTROL05 |       |       | NoAmplification            |
| sul1         | BAL_CONTROL05 |       |       | NoAmplification            |
| sul2         | BAL_CONTROL05 |       |       | NoAmplification            |
| sulA/foIP-01 | BAL_CONTROL05 |       |       | NoAmplification            |
| sulA/foIP-03 | BAL_CONTRC    | 24.93 | 83.47 | 1.82                       |
| tet(32)      | BAL_CONTRC    | 27.05 | 80.95 | 1.74                       |
| tet(34)      | BAL_CONTRC    | 32.01 | 75.32 | 1.86                       |
| tet(35)      | BAL_CONTROL05 |       |       | NoAmplification            |
| tet(36)-A    | BAL_CONTROL05 |       |       | NoAmplification            |
| tet(36)-B    | BAL_CONTROL05 |       |       | NoAmplification            |
| tet(37)      | BAL_CONTRC    | 23.62 | 76.27 | 1.84                       |
| tetA-01      | BAL_CONTROL05 |       |       | NoAmplification            |
| tetA-02      | BAL_CONTROL05 |       |       | BadR2, LowEfficiency, CtlS |
| tetB-01      | BAL_CONTROL05 |       |       | CurveFitFailed             |
| tetB-02      | BAL_CONTRC    | 28.58 | 79.44 | 1.85                       |
| tetC-01      | BAL_CONTROL05 |       |       | NoAmplification            |
| tetC-02      | BAL_CONTRC    | 26.48 | 75.85 | 1.84                       |
| tetD-01      | BAL_CONTROL05 |       |       | NoAmplification            |
| tetD-02      | BAL_CONTROL05 |       |       | NoAmplification            |
| tetE         | BAL_CONTROL05 |       |       | NoAmplification            |
| tetG-01      | BAL_CONTROL05 |       |       | NoAmplification            |
| tetG-02      | BAL_CONTROL05 |       |       | NoAmplification            |
| tetH         | BAL_CONTROL05 |       |       | NoAmplification            |
| tetJ         | BAL_CONTROL05 |       |       | NoAmplification            |
| tetK         | BAL_CONTROL05 |       |       | NoAmplification            |
| tetL-01      | BAL_CONTROL05 |       |       | NoAmplification            |
| tetL-02      | BAL_CONTROL05 |       |       | NoAmplification            |
| tetM-01      | BAL_CONTRC    | 22.66 | 75.23 | 1.72                       |
| tetM-02      | BAL_CONTRC    | 22.84 | 77.21 | 1.7                        |
| tetO-01      | BAL_CONTROL05 |       |       | NoAmplification            |
| tetPA        | BAL_CONTROL05 |       |       | NoAmplification            |
| tetPB-01     | BAL_CONTROL05 |       |       | NoAmplification            |
| tetPB-02     | BAL_CONTROL05 |       |       | NoAmplification            |
| tetPB-03     | BAL_CONTROL05 |       |       | NoAmplification            |
| tetPB-05     | BAL_CONTROL05 |       |       | NoAmplification            |
| tetQ         | BAL_CONTRC    | 19.3  | 76.8  | 1.85                       |
| tetR-02      | BAL_CONTROL05 |       |       | NoAmplification            |
| tetR-03      | BAL_CONTRC    | 27.9  | 75.87 | 1.85                       |
| tetS         | BAL_CONTROL05 |       |       | NoAmplification            |

|             |               |       |       |      |                 |
|-------------|---------------|-------|-------|------|-----------------|
| tetT        | BAL_CONTROL05 |       |       |      | NoAmplification |
| tetU-01     | BAL_CONTROL05 |       |       |      | NoAmplification |
| tetV        | BAL_CONTROL05 |       |       |      | NoAmplification |
| tetW-01     | BAL_CONTRC    | 24.44 | 81.48 | 1.67 |                 |
| tetX        | BAL_CONTROL05 |       |       |      | NoAmplification |
| tnpA-01     | BAL_CONTROL05 |       |       |      | NoAmplification |
| tnpA-02     | BAL_CONTROL05 |       |       |      | NoAmplification |
| tnpA-03     | BAL_CONTROL05 |       |       |      | NoAmplification |
| tnpA-04     | BAL_CONTROL05 |       |       |      | NoAmplification |
| tnpA-05     | BAL_CONTROL05 |       |       |      | NoAmplification |
| tnpA-07     | BAL_CONTROL05 |       |       |      | NoAmplification |
| tolC-01     | BAL_CONTROL05 |       |       |      | NoAmplification |
| tolC-02     | BAL_CONTRC    | 30.51 | 87.58 | 1.9  |                 |
| tolC-03     | BAL_CONTRC    | 32.29 | 86.22 | 1.84 |                 |
| Tp614       | BAL_CONTROL05 |       |       |      | NoAmplification |
| ttgA        | BAL_CONTROL05 |       |       |      | NoAmplification |
| ttgB        | BAL_CONTROL05 |       |       |      | NoAmplification |
| vanA        | BAL_CONTROL05 |       |       |      | NoAmplification |
| vanB-01     | BAL_CONTROL05 |       |       |      | NoAmplification |
| vanC-01     | BAL_CONTROL05 |       |       |      | NoAmplification |
| vanC-02     | BAL_CONTROL05 |       |       |      | NoAmplification |
| vanC-03     | BAL_CONTROL05 |       |       |      | NoAmplification |
| vanC1       | BAL_CONTROL05 |       |       |      | NoAmplification |
| vanC2/vanC3 | BAL_CONTROL05 |       |       |      | NoAmplification |
| vanG        | BAL_CONTROL05 |       |       |      | NoAmplification |
| vanHB       | BAL_CONTROL05 |       |       |      | NoAmplification |
| vanHD       | BAL_CONTROL05 |       |       |      | NoAmplification |
| vanRA-01    | BAL_CONTROL05 |       |       |      | NoAmplification |
| vanRA-02    | BAL_CONTROL05 |       |       |      | NoAmplification |
| vanRB       | BAL_CONTROL05 |       |       |      | NoAmplification |
| vanRC       | BAL_CONTROL05 |       |       |      | NoAmplification |
| vanRC4      | BAL_CONTROL05 |       |       |      | NoAmplification |
| vanRD       | BAL_CONTROL05 |       |       |      | NoAmplification |
| vanSA       | BAL_CONTROL05 |       |       |      | NoAmplification |
| vanSB       | BAL_CONTROL05 |       |       |      | NoAmplification |
| vanSC-01    | BAL_CONTROL05 |       |       |      | NoAmplification |
| vanSC-02    | BAL_CONTROL05 |       |       |      | NoAmplification |
| vanTC-01    | BAL_CONTROL05 |       |       |      | NoAmplification |
| vanTC-02    | BAL_CONTROL05 |       |       |      | NoAmplification |
| vanTE       | BAL_CONTROL05 |       |       |      | NoAmplification |
| vanTG       | BAL_CONTROL05 |       |       |      | NoAmplification |
| vanWB       | BAL_CONTROL05 |       |       |      | NoAmplification |
| vanWG       | BAL_CONTROL05 |       |       |      | NoAmplification |
| vanXA       | BAL_CONTROL05 |       |       |      | NoAmplification |
| vanXB       | BAL_CONTROL05 |       |       |      | NoAmplification |
| vanXD       | BAL_CONTROL05 |       |       |      | NoAmplification |

|              |               |       |       |      |                 |
|--------------|---------------|-------|-------|------|-----------------|
| vanYB        | BAL_CONTROL05 |       |       |      | NoAmplification |
| vanYD-01     | BAL_CONTROL05 |       |       |      | NoAmplification |
| vanYD-02     | BAL_CONTROL05 |       |       |      | NoAmplification |
| vatB-01      | BAL_CONTROL05 |       |       |      | NoAmplification |
| vatB-02      | BAL_CONTROL05 |       |       |      | NoAmplification |
| vatC-01      | BAL_CONTROL05 |       |       |      | NoAmplification |
| vatC-02      | BAL_CONTROL05 |       |       |      | NoAmplification |
| vatE-01      | BAL_CONTROL05 |       |       |      | NoAmplification |
| vatE-02      | BAL_CONTROL05 |       |       |      | NoAmplification |
| vgaA-01      | BAL_CONTROL05 |       |       |      | NoAmplification |
| vgaA-02      | BAL_CONTROL05 |       |       |      | NoAmplification |
| vgb-01       | BAL_CONTROL05 |       |       |      | NoAmplification |
| vgbB-01      | BAL_CONTROL05 |       |       |      | NoAmplification |
| vgbB-02      | BAL_CONTROL05 |       |       |      | NoAmplification |
| yceE/mdtG-0  | BAL_CONTROL05 |       |       |      | NoAmplification |
| yceE/mdtG-0  | BAL_CONTROL05 |       |       |      | NoAmplification |
| yceL/mdtH-0  | BAL_CONTROL05 |       |       |      | NoAmplification |
| yceL/mdtH-0  | BAL_CONTROL05 |       |       |      | NoAmplification |
| yceL/mdtH-0  | BAL_CONTROL05 |       |       |      | NoAmplification |
| yidY/mdtL-01 | BAL_CONTRC    | 30.59 | 87.26 | 1.89 |                 |
| yidY/mdtL-02 | BAL_CONTROL05 |       |       |      | NoAmplification |

| Assay          | Sample        | Ct | Tm    | Efficiency | Flags                  |
|----------------|---------------|----|-------|------------|------------------------|
| 16S rRNA       | BAL_CONTRC    |    | 19.23 | 82.12      | 1.94                   |
| aac            | BAL_CONTRC    |    | 30.24 | 82.84      | 1.78 MultipleMeltPeaks |
| aac(6')-Ib(akz | BAL_CONTROL06 |    |       |            | NoAmplification        |
| aac(6')-Ib(akz | BAL_CONTRC    |    | 33.77 | 80.34      | 1.95 MultipleMeltPeaks |
| aac(6')-Ib(akz | BAL_CONTRC    |    | 37.04 | 76.48      | 1.84 MultipleMeltPeaks |
| aac(6')-II     | BAL_CONTROL06 |    |       |            | CurveFitFailed         |
| aac(6')I1      | BAL_CONTROL06 |    |       |            | NoAmplification        |
| aacA/aphD      | BAL_CONTROL06 |    |       |            | NoAmplification        |
| aacC           | BAL_CONTROL06 |    |       |            | NoAmplification        |
| aacC1          | BAL_CONTROL06 |    |       |            | NoAmplification        |
| aacC2          | BAL_CONTROL06 |    |       |            | NoAmplification        |
| aacC4          | BAL_CONTROL06 |    |       |            | NoAmplification        |
| aadA-01        | BAL_CONTROL06 |    |       |            | NoAmplification        |
| aadA-02        | BAL_CONTROL06 |    |       |            | NoAmplification        |
| aadA-1-01      | BAL_CONTROL06 |    |       |            | NoAmplification        |
| aadA-1-02      | BAL_CONTROL06 |    |       |            | NoAmplification        |
| aadA1          | BAL_CONTROL06 |    |       |            | NoAmplification        |
| aadA2-01       | BAL_CONTROL06 |    |       |            | NoAmplification        |
| aadA2-02       | BAL_CONTROL06 |    |       |            | NoAmplification        |
| aadA2-03       | BAL_CONTROL06 |    |       |            | NoAmplification        |
| aadA5-01       | BAL_CONTRC    |    | 39.17 | 78.61      | 1.78                   |
| aadA5-02       | BAL_CONTRC    |    | 40.26 | 77.09      | 1.74                   |
| aadA9-01       | BAL_CONTRC    |    | 36.42 | 87.64      | 1.86 MultipleMeltPeaks |
| aadA9-02       | BAL_CONTROL06 |    |       |            | NoAmplification        |
| aadD           | BAL_CONTROL06 |    |       |            | NoAmplification        |
| aadE           | BAL_CONTROL06 |    |       |            | NoAmplification        |
| acrA-01        | BAL_CONTRC    |    | 33.38 | 88.78      | 1.98                   |
| acrA-02        | BAL_CONTROL06 |    |       |            | NoAmplification        |
| acrA-03        | BAL_CONTRC    |    | 43.74 | 80.22      | 1.69                   |
| acrA-04        | BAL_CONTRC    |    | 32.82 | 80.44      | 1.97                   |
| acrA-05        | BAL_CONTRC    |    | 32.12 | 79.87      | 1.97 MultipleMeltPeaks |
| acrB-01        | BAL_CONTROL06 |    |       |            | NoAmplification        |
| acrF           | BAL_CONTRC    |    | 39.59 | 81.9       | 1.61 MultipleMeltPeaks |
| acrR-01        | BAL_CONTROL06 |    |       |            | NoAmplification        |
| acrR-02        | BAL_CONTROL06 |    |       |            | NoAmplification        |
| Actin          | BAL_CONTRC    |    | 20.97 | 87.04      | 1.91 MultipleMeltPeaks |
| adeA           | BAL_CONTROL06 |    |       |            | NoAmplification        |
| ampC-01        | BAL_CONTROL06 |    |       |            | NoAmplification        |
| ampC-02        | BAL_CONTRC    |    | 40.63 | 76.39      | 1.84                   |
| ampC-04        | BAL_CONTRC    |    | 35.49 | 77.52      | 1.97                   |
| ampC-05        | BAL_CONTROL06 |    |       |            | NoAmplification        |
| ampC-06        | BAL_CONTROL06 |    |       |            | NoAmplification        |
| ampC-07        | BAL_CONTROL06 |    |       |            | NoAmplification        |
| ampC-09        | BAL_CONTROL06 |    |       |            | NoAmplification        |
| ampC/blaDH     | BAL_CONTRC    |    | 34.6  | 77.28      | 1.95                   |

|                          |               |       |       |      |                           |
|--------------------------|---------------|-------|-------|------|---------------------------|
| aph                      | BAL_CONTROL06 |       |       |      | NoAmplification           |
| aph(2')-Id-01            | BAL_CONTROL06 |       |       |      | NoAmplification           |
| aph(2')-Id-02            | BAL_CONTROL06 |       |       |      | NoAmplification           |
| aph6ia                   | BAL_CONTRC    | 37.73 | 78.38 | 1.77 |                           |
| aphA1(aka k <sub>z</sub> | BAL_CONTROL06 |       |       |      | NoAmplification           |
| bacA-01                  | BAL_CONTROL06 |       |       |      | NoAmplification           |
| bacA-02                  | BAL_CONTROL06 |       |       |      | NoAmplification           |
| BETA-globin              | BAL_CONTRC    | 22.39 | 84.31 | 1.97 |                           |
| bla-ACC-1                | BAL_CONTROL06 |       |       |      | NoAmplification           |
| bla-L1                   | BAL_CONTRC    | 33.15 | 82.09 | 1.88 |                           |
| bla1                     | BAL_CONTROL06 |       |       |      | NoAmplification           |
| blaCMY                   | BAL_CONTROL06 |       |       |      | NoAmplification           |
| blaCMY2-01               | BAL_CONTROL06 |       |       |      | NoAmplification           |
| blaCMY2-02               | BAL_CONTRC    | 32.36 | 83.67 | 1.92 | MultipleMeltPeaks         |
| blaCTX-M-01              | BAL_CONTROL06 |       |       |      | NoAmplification           |
| blaCTX-M-02              | BAL_CONTROL06 |       |       |      | NoAmplification           |
| blaCTX-M-03              | BAL_CONTROL06 |       |       |      | NoAmplification           |
| blaCTX-M-04              | BAL_CONTROL06 |       |       |      | NoAmplification           |
| blaCTX-M-05              | BAL_CONTRC    | 35.58 | 75.25 | 1.86 |                           |
| blaCTX-M-06              | BAL_CONTROL06 |       |       |      | NoAmplification           |
| blaGES                   | BAL_CONTROL06 |       |       |      | NoAmplification           |
| blaIMP-01                | BAL_CONTROL06 |       |       |      | NoAmplification           |
| blaIMP-02                | BAL_CONTROL06 |       |       |      | CtIsLarge, CurveFitFailed |
| blaMOX/blaC              | BAL_CONTROL06 |       |       |      | NoAmplification           |
| blaOCH                   | BAL_CONTROL06 |       |       |      | NoAmplification           |
| blaOKP                   | BAL_CONTROL06 |       |       |      | NoAmplification           |
| blaOXA1/blaC             | BAL_CONTROL06 |       |       |      | NoAmplification           |
| blaOXA10-01              | BAL_CONTROL06 |       |       |      | NoAmplification           |
| blaOXA10-02              | BAL_CONTROL06 |       |       |      | NoAmplification           |
| blaOXY                   | BAL_CONTROL06 |       |       |      | NoAmplification           |
| blaPAO                   | BAL_CONTROL06 |       |       |      | NoAmplification           |
| blaPER                   | BAL_CONTROL06 |       |       |      | NoAmplification           |
| blaPSE                   | BAL_CONTROL06 |       |       |      | NoAmplification           |
| blaROB                   | BAL_CONTROL06 |       |       |      | NoAmplification           |
| blaSFO                   | BAL_CONTROL06 |       |       |      | NoAmplification           |
| blaSHV-01                | BAL_CONTROL06 |       |       |      | NoAmplification           |
| blaSHV-02                | BAL_CONTROL06 |       |       |      | NoAmplification           |
| blaTEM                   | BAL_CONTROL06 |       |       |      | NoAmplification           |
| blaTLA                   | BAL_CONTROL06 |       |       |      | NoAmplification           |
| blaVEB                   | BAL_CONTROL06 |       |       |      | NoAmplification           |
| blaVIM                   | BAL_CONTROL06 |       |       |      | NoAmplification           |
| blaZ                     | BAL_CONTROL06 |       |       |      | NoAmplification           |
| carB                     | BAL_CONTRC    | 33.67 | 89.01 | 1.81 |                           |
| catA1                    | BAL_CONTROL06 |       |       |      | NoAmplification           |
| catB3                    | BAL_CONTROL06 |       |       |      | NoAmplification           |
| catB8                    | BAL_CONTRC    | 30.79 | 81.53 | 1.99 |                           |

|            |               |       |       |      |                              |
|------------|---------------|-------|-------|------|------------------------------|
| ceoA       | BAL_CONTRC    | 29.16 | 82.29 | 1.98 |                              |
| cepA       | BAL_CONTROL06 |       |       |      | NoAmplification              |
| cfiA       | BAL_CONTRC    | 33    | 83.63 | 1.78 |                              |
| cfr        | BAL_CONTROL06 |       |       |      | NoAmplification              |
| cfxA       | BAL_CONTRC    | 22.05 | 77.45 | 1.75 |                              |
| cmeA       | BAL_CONTROL06 |       |       |      | NoAmplification              |
| cmlA1-01   | BAL_CONTROL06 |       |       |      | NoAmplification              |
| cmlA1-02   | BAL_CONTRC    | 36.02 | 81.93 | 1.89 |                              |
| cmr        | BAL_CONTROL06 |       |       |      | NoAmplification              |
| cmx(A)     | BAL_CONTRC    | 26.1  | 84.47 | 1.93 | MultipleMeltPeaks            |
| cphA-01    | BAL_CONTROL06 |       |       |      | NoAmplification              |
| cphA-02    | BAL_CONTRC    | 37.29 | 76.75 | 1.83 |                              |
| dfrA1      | BAL_CONTROL06 |       |       |      | NoAmplification              |
| dfrA12     | BAL_CONTRC    | 36.11 | 77.92 | 1.96 |                              |
| emrD       | BAL_CONTROL06 |       |       |      | NoAmplification              |
| ereA       | BAL_CONTROL06 |       |       |      | NoAmplification              |
| ereB       | BAL_CONTROL06 |       |       |      | NoAmplification              |
| erm(34)    | BAL_CONTROL06 |       |       |      | NoAmplification              |
| erm(35)    | BAL_CONTROL06 |       |       |      | NoAmplification              |
| erm(36)    | BAL_CONTROL06 |       |       |      | NoAmplification              |
| ermA       | BAL_CONTROL06 |       |       |      | NoAmplification              |
| ermA/ermTR | BAL_CONTROL06 |       |       |      | NoAmplification              |
| ermB       | BAL_CONTROL06 |       |       |      | NoAmplification              |
| ermC       | BAL_CONTROL06 |       |       |      | NoAmplification              |
| ermF       | BAL_CONTRC    | 28.7  | 74.39 | 2    |                              |
| ermJ/ermD  | BAL_CONTROL06 |       |       |      | NoAmplification              |
| ermK-01    | BAL_CONTROL06 |       |       |      | NoAmplification              |
| ermK-02    | BAL_CONTROL06 |       |       |      | NoAmplification              |
| ermT-01    | BAL_CONTROL06 |       |       |      | NoAmplification              |
| ermT-02    | BAL_CONTROL06 |       |       |      | NoAmplification              |
| ermX       | BAL_CONTROL06 |       |       |      | NoAmplification              |
| ermY       | BAL_CONTROL06 |       |       |      | NoAmplification              |
| fabK       | BAL_CONTRC    | 28.66 | 77.22 | 1.92 |                              |
| floR       | BAL_CONTROL06 |       |       |      | NoAmplification              |
| folA       | BAL_CONTROL06 |       |       |      | NoAmplification              |
| fosB       | BAL_CONTROL06 |       |       |      | LowEfficiency, CtIsSmall, Ci |
| fosX       | BAL_CONTROL06 |       |       |      | NoAmplification              |
| fox5       | BAL_CONTRC    | 31.6  | 86.22 | 1.75 | MultipleMeltPeaks            |
| imiR       | BAL_CONTROL06 |       |       |      | NoAmplification              |
| ImrA-01    | BAL_CONTROL06 |       |       |      | NoAmplification              |
| intl       | BAL_CONTRC    | 35.35 | 84.09 | 1.9  |                              |
| intl1      | BAL_CONTRC    | 22.67 | 87.04 | 1.98 | MultipleMeltPeaks            |
| IS613      | BAL_CONTRC    | 24.53 | 79.7  | 1.8  |                              |
| lnuA-01    | BAL_CONTROL06 |       |       |      | NoAmplification              |
| lnuB-01    | BAL_CONTROL06 |       |       |      | NoAmplification              |
| lnuB-02    | BAL_CONTROL06 |       |       |      | NoAmplification              |

|               |               |       |       |      |                   |
|---------------|---------------|-------|-------|------|-------------------|
| lnuC          | BAL_CONTROL06 |       |       |      | NoAmplification   |
| marR-01       | BAL_CONTRC    | 34.66 | 85.54 | 1.91 |                   |
| matA/mel      | BAL_CONTRC    | 22.27 | 77.66 | 2.08 |                   |
| mdet1         | BAL_CONTROL06 |       |       |      | NoAmplification   |
| mdtA          | BAL_CONTROL06 |       |       |      | CurveFitFailed    |
| mdtE/yhiU     | BAL_CONTRC    | 32.41 | 84.77 | 1.93 |                   |
| mecA          | BAL_CONTROL06 |       |       |      | NoAmplification   |
| mefA          | BAL_CONTRC    | 21.85 | 80.67 | 1.99 |                   |
| mepA          | BAL_CONTROL06 |       |       |      | CurveFitFailed    |
| mexA          | BAL_CONTROL06 |       |       |      | NoAmplification   |
| mexD          | BAL_CONTROL06 |       |       |      | NoAmplification   |
| mexE          | BAL_CONTROL06 |       |       |      | NoAmplification   |
| mexF          | BAL_CONTRC    | 36.43 | 80.88 | 1.86 |                   |
| mphA-01       | BAL_CONTRC    | 33.52 | 80.07 | 1.86 | MultipleMeltPeaks |
| mphA-02       | BAL_CONTRC    | 37.32 | 75.54 | 1.42 | MultipleMeltPeaks |
| mphB          | BAL_CONTROL06 |       |       |      | NoAmplification   |
| mphC          | BAL_CONTROL06 |       |       |      | NoAmplification   |
| msrA-01       | BAL_CONTROL06 |       |       |      | NoAmplification   |
| msrC-01       | BAL_CONTROL06 |       |       |      | NoAmplification   |
| mtrC-01       | BAL_CONTROL06 |       |       |      | NoAmplification   |
| mtrC-02       | BAL_CONTRC    | 43.76 | 84.43 | 1.69 |                   |
| mtrD-02       | BAL_CONTRC    | 30.69 | 81.2  | 1.97 |                   |
| mtrD-03       | BAL_CONTROL06 |       |       |      | NoAmplification   |
| NDM1          | BAL_CONTROL06 |       |       |      | NoAmplification   |
| nimE          | BAL_CONTROL06 |       |       |      | NoAmplification   |
| nisB          | BAL_CONTROL06 |       |       |      | NoAmplification   |
| oleC          | BAL_CONTROL06 |       |       |      | NoAmplification   |
| oprD          | BAL_CONTRC    | 29.46 | 81.59 | 1.96 | MultipleMeltPeaks |
| oprJ          | BAL_CONTROL06 |       |       |      | NoAmplification   |
| pbp           | BAL_CONTROL06 |       |       |      | NoAmplification   |
| pbp2x         | BAL_CONTRC    | 25.55 | 75.62 | 1.79 |                   |
| Pbp5          | BAL_CONTROL06 |       |       |      | NoAmplification   |
| penA          | BAL_CONTROL06 |       |       |      | NoAmplification   |
| pikR1         | BAL_CONTRC    | 40.39 | 80.44 | 1.76 |                   |
| pikR2         | BAL_CONTRC    | 31.42 | 84.81 | 1.82 |                   |
| pmrA          | BAL_CONTRC    | 25.4  | 79.55 | 2.01 |                   |
| pncA          | BAL_CONTROL06 |       |       |      | NoAmplification   |
| putative mulI | BAL_CONTROL06 |       |       |      | CurveFitFailed    |
| qac           | BAL_CONTROL06 |       |       |      | NoAmplification   |
| qacA          | BAL_CONTROL06 |       |       |      | NoAmplification   |
| qacA/qacB     | BAL_CONTROL06 |       |       |      | NoAmplification   |
| qacEdelta1-0  | BAL_CONTROL06 |       |       |      | NoAmplification   |
| qacEdelta1-0  | BAL_CONTROL06 |       |       |      | NoAmplification   |
| qacH-01       | BAL_CONTRC    | 31.75 | 82.38 | 1.92 |                   |
| qacH-02       | BAL_CONTRC    | 38.59 | 84.09 | 1.6  |                   |
| qnrA          | BAL_CONTROL06 |       |       |      | CurveFitFailed    |



|              |               |       |       |      |                 |
|--------------|---------------|-------|-------|------|-----------------|
| rarD-02      | BAL_CONTROL06 |       |       |      | NoAmplification |
| sat4         | BAL_CONTROL06 |       |       |      | NoAmplification |
| sdeB         | BAL_CONTROL06 |       |       |      | NoAmplification |
| spcN-01      | BAL_CONTROL06 |       |       |      | NoAmplification |
| speA         | BAL_CONTROL06 |       |       |      | NoAmplification |
| str          | BAL_CONTROL06 |       |       |      | NoAmplification |
| strA         | BAL_CONTROL06 |       |       |      | NoAmplification |
| strB         | BAL_CONTROL06 |       |       |      | CurveFitFailed  |
| sul1         | BAL_CONTROL06 |       |       |      | NoAmplification |
| sul2         | BAL_CONTROL06 |       |       |      | NoAmplification |
| sulA/foIP-01 | BAL_CONTRC    | 21.48 | 80.46 | 1.89 |                 |
| sulA/foIP-03 | BAL_CONTRC    | 22.93 | 83.86 | 1.98 |                 |
| tet(32)      | BAL_CONTROL06 |       |       |      | NoAmplification |
| tet(34)      | BAL_CONTRC    | 29.55 | 75.71 | 1.96 |                 |
| tet(35)      | BAL_CONTROL06 |       |       |      | NoAmplification |
| tet(36)-A    | BAL_CONTROL06 |       |       |      | NoAmplification |
| tet(36)-B    | BAL_CONTROL06 |       |       |      | NoAmplification |
| tet(37)      | BAL_CONTROL06 |       |       |      | NoAmplification |
| tetA-01      | BAL_CONTROL06 |       |       |      | NoAmplification |
| tetA-02      | BAL_CONTROL06 |       |       |      | NoAmplification |
| tetB-01      | BAL_CONTROL06 |       |       |      | NoAmplification |
| tetB-02      | BAL_CONTRC    | 30.19 | 75.09 | 1.99 |                 |
| tetC-01      | BAL_CONTROL06 |       |       |      | NoAmplification |
| tetC-02      | BAL_CONTROL06 |       |       |      | NoAmplification |
| tetD-01      | BAL_CONTROL06 |       |       |      | NoAmplification |
| tetD-02      | BAL_CONTRC    | 32.99 | 77.34 | 1.93 |                 |
| tetE         | BAL_CONTROL06 |       |       |      | NoAmplification |
| tetG-01      | BAL_CONTROL06 |       |       |      | NoAmplification |
| tetG-02      | BAL_CONTROL06 |       |       |      | NoAmplification |
| tetH         | BAL_CONTROL06 |       |       |      | NoAmplification |
| tetJ         | BAL_CONTROL06 |       |       |      | NoAmplification |
| tetK         | BAL_CONTROL06 |       |       |      | NoAmplification |
| tetL-01      | BAL_CONTROL06 |       |       |      | NoAmplification |
| tetL-02      | BAL_CONTROL06 |       |       |      | NoAmplification |
| tetM-01      | BAL_CONTRC    | 22.08 | 75.97 | 1.99 |                 |
| tetM-02      | BAL_CONTRC    | 21.97 | 77.52 | 1.96 |                 |
| tetO-01      | BAL_CONTRC    | 27.53 | 76.46 | 1.8  |                 |
| tetPA        | BAL_CONTROL06 |       |       |      | NoAmplification |
| tetPB-01     | BAL_CONTROL06 |       |       |      | NoAmplification |
| tetPB-02     | BAL_CONTRC    | 34.34 | 84.79 | 2.02 |                 |
| tetPB-03     | BAL_CONTROL06 |       |       |      | NoAmplification |
| tetPB-05     | BAL_CONTROL06 |       |       |      | NoAmplification |
| tetQ         | BAL_CONTRC    | 25.58 | 76.53 | 2.04 |                 |
| tetR-02      | BAL_CONTRC    | 31.59 | 84.27 | 1.53 |                 |
| tetR-03      | BAL_CONTROL06 |       |       |      | NoAmplification |
| tetS         | BAL_CONTROL06 |       |       |      | NoAmplification |

|             |               |       |       |      |                   |
|-------------|---------------|-------|-------|------|-------------------|
| tetT        | BAL_CONTRC    | 33.64 | 73.4  | 2.09 |                   |
| tetU-01     | BAL_CONTROL06 |       |       |      | NoAmplification   |
| tetV        | BAL_CONTROL06 |       |       |      | NoAmplification   |
| tetW-01     | BAL_CONTRC    | 26.76 | 81.13 | 1.91 |                   |
| tetX        | BAL_CONTROL06 |       |       |      | NoAmplification   |
| tnpA-01     | BAL_CONTRC    | 37.45 | 86.29 | 1.86 |                   |
| tnpA-02     | BAL_CONTRC    | 38.59 | 85.26 | 1.77 |                   |
| tnpA-03     | BAL_CONTRC    | 30.7  | 75.45 | 2.05 |                   |
| tnpA-04     | BAL_CONTROL06 |       |       |      | NoAmplification   |
| tnpA-05     | BAL_CONTROL06 |       |       |      | NoAmplification   |
| tnpA-07     | BAL_CONTROL06 |       |       |      | NoAmplification   |
| tolC-01     | BAL_CONTROL06 |       |       |      | NoAmplification   |
| tolC-02     | BAL_CONTRC    | 34.57 | 87.96 | 1.9  |                   |
| tolC-03     | BAL_CONTRC    | 32.43 | 86.01 | 1.94 |                   |
| Tp614       | BAL_CONTROL06 |       |       |      | NoAmplification   |
| ttgA        | BAL_CONTROL06 |       |       |      | CurveFitFailed    |
| ttgB        | BAL_CONTROL06 |       |       |      | NoAmplification   |
| vanA        | BAL_CONTROL06 |       |       |      | NoAmplification   |
| vanB-01     | BAL_CONTRC    | 28.1  | 73.08 | 1.42 |                   |
| vanC-01     | BAL_CONTROL06 |       |       |      | NoAmplification   |
| vanC-02     | BAL_CONTROL06 |       |       |      | NoAmplification   |
| vanC-03     | BAL_CONTRC    | 31.46 | 77.45 | 1.79 |                   |
| vanC1       | BAL_CONTROL06 |       |       |      | NoAmplification   |
| vanC2/vanC3 | BAL_CONTRC    | 35.61 | 80.42 | 1.46 | MultipleMeltPeaks |
| vanG        | BAL_CONTROL06 |       |       |      | NoAmplification   |
| vanHB       | BAL_CONTROL06 |       |       |      | NoAmplification   |
| vanHD       | BAL_CONTROL06 |       |       |      | NoAmplification   |
| vanRA-01    | BAL_CONTROL06 |       |       |      | NoAmplification   |
| vanRA-02    | BAL_CONTROL06 |       |       |      | NoAmplification   |
| vanRB       | BAL_CONTROL06 |       |       |      | NoAmplification   |
| vanRC       | BAL_CONTROL06 |       |       |      | NoAmplification   |
| vanRC4      | BAL_CONTROL06 |       |       |      | NoAmplification   |
| vanRD       | BAL_CONTROL06 |       |       |      | NoAmplification   |
| vanSA       | BAL_CONTROL06 |       |       |      | NoAmplification   |
| vanSB       | BAL_CONTROL06 |       |       |      | NoAmplification   |
| vanSC-01    | BAL_CONTROL06 |       |       |      | NoAmplification   |
| vanSC-02    | BAL_CONTROL06 |       |       |      | NoAmplification   |
| vanTC-01    | BAL_CONTROL06 |       |       |      | NoAmplification   |
| vanTC-02    | BAL_CONTROL06 |       |       |      | NoAmplification   |
| vanTE       | BAL_CONTROL06 |       |       |      | NoAmplification   |
| vanTG       | BAL_CONTROL06 |       |       |      | NoAmplification   |
| vanWB       | BAL_CONTROL06 |       |       |      | NoAmplification   |
| vanWG       | BAL_CONTROL06 |       |       |      | NoAmplification   |
| vanXA       | BAL_CONTROL06 |       |       |      | NoAmplification   |
| vanXB       | BAL_CONTROL06 |       |       |      | NoAmplification   |
| vanXD       | BAL_CONTRC    | 31.61 | 74.62 | 1.91 |                   |

|              |               |       |       |      |                   |
|--------------|---------------|-------|-------|------|-------------------|
| vanYB        | BAL_CONTROL06 |       |       |      | NoAmplification   |
| vanYD-01     | BAL_CONTROL06 |       |       |      | CurveFitFailed    |
| vanYD-02     | BAL_CONTROL06 |       |       |      | NoAmplification   |
| vatB-01      | BAL_CONTROL06 |       |       |      | NoAmplification   |
| vatB-02      | BAL_CONTROL06 |       |       |      | NoAmplification   |
| vatC-01      | BAL_CONTROL06 |       |       |      | CurveFitFailed    |
| vatC-02      | BAL_CONTRC    | 39.08 | 87.32 | 1.72 | MultipleMeltPeaks |
| vatE-01      | BAL_CONTRC    | 29.08 | 76.2  | 2.03 |                   |
| vatE-02      | BAL_CONTROL06 |       |       |      | NoAmplification   |
| vgaA-01      | BAL_CONTROL06 |       |       |      | NoAmplification   |
| vgaA-02      | BAL_CONTROL06 |       |       |      | NoAmplification   |
| vgb-01       | BAL_CONTROL06 |       |       |      | NoAmplification   |
| vgbB-01      | BAL_CONTROL06 |       |       |      | NoAmplification   |
| vgbB-02      | BAL_CONTROL06 |       |       |      | NoAmplification   |
| yceE/mdtG-0  | BAL_CONTROL06 |       |       |      | NoAmplification   |
| yceE/mdtG-0  | BAL_CONTROL06 |       |       |      | NoAmplification   |
| yceL/mdtH-0  | BAL_CONTROL06 |       |       |      | CurveFitFailed    |
| yceL/mdtH-0  | BAL_CONTROL06 |       |       |      | NoAmplification   |
| yceL/mdtH-0  | BAL_CONTROL06 |       |       |      | NoAmplification   |
| yidY/mdtL-01 | BAL_CONTRC    | 37.81 | 84.81 | 1.75 | MultipleMeltPeaks |
| yidY/mdtL-02 | BAL_CONTROL06 |       |       |      | NoAmplification   |

| Assay          | Sample        | Ct | Tm    | Efficiency | Flags                  |
|----------------|---------------|----|-------|------------|------------------------|
| 16S rRNA       | BAL_CONTRC    |    | 21.46 | 82.19      | 1.93                   |
| aac            | BAL_CONTRC    |    | 33.26 | 90.35      | 1.57                   |
| aac(6')-Ib(akz | BAL_CONTROL07 |    |       |            | NoAmplification        |
| aac(6')-Ib(akz | BAL_CONTRC    |    | 33.62 | 79.32      | 1.99                   |
| aac(6')-Ib(akz | BAL_CONTROL07 |    |       |            | CurveFitFailed         |
| aac(6')-II     | BAL_CONTROL07 |    |       |            | NoAmplification        |
| aac(6')I1      | BAL_CONTROL07 |    |       |            | NoAmplification        |
| aacA/aphD      | BAL_CONTROL07 |    |       |            | NoAmplification        |
| aacC           | BAL_CONTROL07 |    |       |            | NoAmplification        |
| aacC1          | BAL_CONTROL07 |    |       |            | NoAmplification        |
| aacC2          | BAL_CONTROL07 |    |       |            | NoAmplification        |
| aacC4          | BAL_CONTROL07 |    |       |            | NoAmplification        |
| aadA-01        | BAL_CONTROL07 |    |       |            | NoAmplification        |
| aadA-02        | BAL_CONTROL07 |    |       |            | NoAmplification        |
| aadA-1-01      | BAL_CONTRC    |    | 33.15 | 76.12      | 1.93                   |
| aadA-1-02      | BAL_CONTROL07 |    |       |            | NoAmplification        |
| aadA1          | BAL_CONTROL07 |    |       |            | NoAmplification        |
| aadA2-01       | BAL_CONTROL07 |    |       |            | NoAmplification        |
| aadA2-02       | BAL_CONTROL07 |    |       |            | NoAmplification        |
| aadA2-03       | BAL_CONTROL07 |    |       |            | NoAmplification        |
| aadA5-01       | BAL_CONTROL07 |    |       |            | NoAmplification        |
| aadA5-02       | BAL_CONTROL07 |    |       |            | NoAmplification        |
| aadA9-01       | BAL_CONTROL07 |    |       |            | NoAmplification        |
| aadA9-02       | BAL_CONTROL07 |    |       |            | NoAmplification        |
| aadD           | BAL_CONTROL07 |    |       |            | NoAmplification        |
| aadE           | BAL_CONTROL07 |    |       |            | NoAmplification        |
| acrA-01        | BAL_CONTRC    |    | 39.15 | 88.81      | 1.72 MultipleMeltPeaks |
| acrA-02        | BAL_CONTROL07 |    |       |            | NoAmplification        |
| acrA-03        | BAL_CONTROL07 |    |       |            | NoAmplification        |
| acrA-04        | BAL_CONTRC    |    | 33.61 | 80.46      | 1.98                   |
| acrA-05        | BAL_CONTRC    |    | 33.69 | 80.07      | 1.96 MultipleMeltPeaks |
| acrB-01        | BAL_CONTROL07 |    |       |            | NoAmplification        |
| acrF           | BAL_CONTRC    |    | 38.34 | 82.06      | 1.76                   |
| acrR-01        | BAL_CONTROL07 |    |       |            | NoAmplification        |
| acrR-02        | BAL_CONTRC    |    | 38.62 | 83.49      | 1.77 MultipleMeltPeaks |
| Actin          | BAL_CONTRC    |    | 21.91 | 87.22      | 1.89 MultipleMeltPeaks |
| adeA           | BAL_CONTRC    |    | 37.34 | 84         | 1.68                   |
| ampC-01        | BAL_CONTRC    |    | 35.39 | 85.54      | 1.86                   |
| ampC-02        | BAL_CONTROL07 |    |       |            | NoAmplification        |
| ampC-04        | BAL_CONTROL07 |    |       |            | NoAmplification        |
| ampC-05        | BAL_CONTROL07 |    |       |            | NoAmplification        |
| ampC-06        | BAL_CONTROL07 |    |       |            | NoAmplification        |
| ampC-07        | BAL_CONTROL07 |    |       |            | NoAmplification        |
| ampC-09        | BAL_CONTROL07 |    |       |            | NoAmplification        |
| ampC/blaDH     | BAL_CONTRC    |    | 36.31 | 76.01      | 1.88 MultipleMeltPeaks |

|                          |               |       |       |      |                   |
|--------------------------|---------------|-------|-------|------|-------------------|
| aph                      | BAL_CONTROL07 |       |       |      | NoAmplification   |
| aph(2')-Id-01            | BAL_CONTROL07 |       |       |      | NoAmplification   |
| aph(2')-Id-02            | BAL_CONTROL07 |       |       |      | NoAmplification   |
| aph6ia                   | BAL_CONTRC    | 30.72 | 78.09 | 1.99 | MultipleMeltPeaks |
| aphA1(aka k <sub>z</sub> | BAL_CONTROL07 |       |       |      | NoAmplification   |
| bacA-01                  | BAL_CONTROL07 |       |       |      | NoAmplification   |
| bacA-02                  | BAL_CONTROL07 |       |       |      | NoAmplification   |
| BETA-globin              | BAL_CONTRC    | 22.56 | 84.28 | 1.97 |                   |
| bla-ACC-1                | BAL_CONTROL07 |       |       |      | NoAmplification   |
| bla-L1                   | BAL_CONTRC    | 32.65 | 83.69 | 1.94 |                   |
| bla1                     | BAL_CONTROL07 |       |       |      | NoAmplification   |
| blaCMY                   | BAL_CONTROL07 |       |       |      | NoAmplification   |
| blaCMY2-01               | BAL_CONTROL07 |       |       |      | NoAmplification   |
| blaCMY2-02               | BAL_CONTRC    | 34.76 | 82.04 | 1.9  |                   |
| blaCTX-M-01              | BAL_CONTROL07 |       |       |      | NoAmplification   |
| blaCTX-M-02              | BAL_CONTROL07 |       |       |      | NoAmplification   |
| blaCTX-M-03              | BAL_CONTROL07 |       |       |      | NoAmplification   |
| blaCTX-M-04              | BAL_CONTROL07 |       |       |      | NoAmplification   |
| blaCTX-M-05              | BAL_CONTRC    | 33.86 | 76.4  | 1.91 |                   |
| blaCTX-M-06              | BAL_CONTROL07 |       |       |      | NoAmplification   |
| blaGES                   | BAL_CONTROL07 |       |       |      | NoAmplification   |
| blaIMP-01                | BAL_CONTROL07 |       |       |      | NoAmplification   |
| blaIMP-02                | BAL_CONTROL07 |       |       |      | NoAmplification   |
| blaMOX/blaC              | BAL_CONTROL07 |       |       |      | NoAmplification   |
| blaOCH                   | BAL_CONTROL07 |       |       |      | NoAmplification   |
| blaOKP                   | BAL_CONTROL07 |       |       |      | NoAmplification   |
| blaOXA1/blaC             | BAL_CONTROL07 |       |       |      | NoAmplification   |
| blaOXA10-01              | BAL_CONTROL07 |       |       |      | NoAmplification   |
| blaOXA10-02              | BAL_CONTROL07 |       |       |      | NoAmplification   |
| blaOXY                   | BAL_CONTROL07 |       |       |      | NoAmplification   |
| blaPAO                   | BAL_CONTROL07 |       |       |      | NoAmplification   |
| blaPER                   | BAL_CONTROL07 |       |       |      | NoAmplification   |
| blaPSE                   | BAL_CONTROL07 |       |       |      | NoAmplification   |
| blaROB                   | BAL_CONTROL07 |       |       |      | NoAmplification   |
| blaSFO                   | BAL_CONTROL07 |       |       |      | NoAmplification   |
| blaSHV-01                | BAL_CONTROL07 |       |       |      | NoAmplification   |
| blaSHV-02                | BAL_CONTROL07 |       |       |      | NoAmplification   |
| blaTEM                   | BAL_CONTROL07 |       |       |      | NoAmplification   |
| blaTLA                   | BAL_CONTROL07 |       |       |      | NoAmplification   |
| blaVEB                   | BAL_CONTROL07 |       |       |      | NoAmplification   |
| blaVIM                   | BAL_CONTROL07 |       |       |      | NoAmplification   |
| blaZ                     | BAL_CONTROL07 |       |       |      | NoAmplification   |
| carB                     | BAL_CONTROL07 |       |       |      | NoAmplification   |
| catA1                    | BAL_CONTROL07 |       |       |      | NoAmplification   |
| catB3                    | BAL_CONTROL07 |       |       |      | NoAmplification   |
| catB8                    | BAL_CONTRC    | 32.43 | 83    | 1.99 |                   |

|            |               |       |       |      |                             |
|------------|---------------|-------|-------|------|-----------------------------|
| ceoA       | BAL_CONTRC    | 27    | 82.37 | 1.93 |                             |
| cepA       | BAL_CONTROL07 |       |       |      | NoAmplification             |
| cfiA       | BAL_CONTROL07 |       |       |      | NoAmplification             |
| cfr        | BAL_CONTROL07 |       |       |      | NoAmplification             |
| cfxA       | BAL_CONTRC    | 23.7  | 77.43 | 1.74 |                             |
| cmeA       | BAL_CONTROL07 |       |       |      | NoAmplification             |
| cmlA1-01   | BAL_CONTRC    | 36.2  | 75.6  | 1.89 |                             |
| cmlA1-02   | BAL_CONTROL07 |       |       |      | NoAmplification             |
| cmr        | BAL_CONTROL07 |       |       |      | NoAmplification             |
| cmx(A)     | BAL_CONTRC    | 30.89 | 84.41 | 1.91 |                             |
| cphA-01    | BAL_CONTRC    | 36.77 | 85.4  | 1.84 |                             |
| cphA-02    | BAL_CONTRC    | 29.41 | 77.84 | 1.94 |                             |
| dfrA1      | BAL_CONTROL07 |       |       |      | NoAmplification             |
| dfrA12     | BAL_CONTROL07 |       |       |      | NoAmplification             |
| emrD       | BAL_CONTROL07 |       |       |      | NoAmplification             |
| ereA       | BAL_CONTROL07 |       |       |      | NoAmplification             |
| ereB       | BAL_CONTROL07 |       |       |      | NoAmplification             |
| erm(34)    | BAL_CONTROL07 |       |       |      | NoAmplification             |
| erm(35)    | BAL_CONTROL07 |       |       |      | NoAmplification             |
| erm(36)    | BAL_CONTROL07 |       |       |      | NoAmplification             |
| ermA       | BAL_CONTROL07 |       |       |      | NoAmplification             |
| ermA/ermTR | BAL_CONTROL07 |       |       |      | NoAmplification             |
| ermB       | BAL_CONTRC    | 27.42 | 74.94 | 1.98 |                             |
| ermC       | BAL_CONTROL07 |       |       |      | NoAmplification             |
| ermF       | BAL_CONTROL07 |       |       |      | NoAmplification             |
| ermJ/ermD  | BAL_CONTROL07 |       |       |      | NoAmplification             |
| ermK-01    | BAL_CONTROL07 |       |       |      | NoAmplification             |
| ermK-02    | BAL_CONTROL07 |       |       |      | NoAmplification             |
| ermT-01    | BAL_CONTROL07 |       |       |      | NoAmplification             |
| ermT-02    | BAL_CONTROL07 |       |       |      | NoAmplification             |
| ermX       | BAL_CONTROL07 |       |       |      | NoAmplification             |
| ermY       | BAL_CONTROL07 |       |       |      | NoAmplification             |
| fabK       | BAL_CONTRC    | 30.11 | 79.39 | 2.12 |                             |
| floR       | BAL_CONTROL07 |       |       |      | NoAmplification             |
| folA       | BAL_CONTROL07 |       |       |      | NoAmplification             |
| fosB       | BAL_CONTROL07 |       |       |      | LowEfficiency, CtlSmall, Ci |
| fosX       | BAL_CONTROL07 |       |       |      | NoAmplification             |
| fox5       | BAL_CONTRC    | 34.28 | 86.32 | 1.75 |                             |
| imiR       | BAL_CONTROL07 |       |       |      | NoAmplification             |
| ImrA-01    | BAL_CONTROL07 |       |       |      | NoAmplification             |
| intl       | BAL_CONTRC    | 35.07 | 86.14 | 1.86 | MultipleMeltPeaks           |
| intl1      | BAL_CONTRC    | 22.6  | 87.23 | 1.96 |                             |
| IS613      | BAL_CONTRC    | 22.17 | 79.67 | 2.01 |                             |
| lnuA-01    | BAL_CONTROL07 |       |       |      | NoAmplification             |
| lnuB-01    | BAL_CONTROL07 |       |       |      | NoAmplification             |
| lnuB-02    | BAL_CONTROL07 |       |       |      | NoAmplification             |

|               |               |       |       |                 |
|---------------|---------------|-------|-------|-----------------|
| lnuC          | BAL_CONTROL07 |       |       | NoAmplification |
| marR-01       | BAL_CONTROL07 |       |       | NoAmplification |
| matA/mel      | BAL_CONTRC    | 28.54 | 77.44 | 2               |
| mdet1         | BAL_CONTROL07 |       |       | NoAmplification |
| mdtA          | BAL_CONTROL07 |       |       | CurveFitFailed  |
| mdtE/yhiU     | BAL_CONTRC    | 37.37 | 82.71 | 1.82            |
| mecA          | BAL_CONTROL07 |       |       | NoAmplification |
| mefA          | BAL_CONTRC    | 27.81 | 80.56 | 1.94            |
| mepA          | BAL_CONTROL07 |       |       | NoAmplification |
| mexA          | BAL_CONTROL07 |       |       | NoAmplification |
| mexD          | BAL_CONTRC    | 35.36 | 79.87 | 1.97            |
| mexE          | BAL_CONTROL07 |       |       | NoAmplification |
| mexF          | BAL_CONTRC    | 33.54 | 83.04 | 1.7             |
| mphA-01       | BAL_CONTRC    | 31.66 | 87.03 | 1.92            |
| mphA-02       | BAL_CONTROL07 |       |       | NoAmplification |
| mphB          | BAL_CONTROL07 |       |       | NoAmplification |
| mphC          | BAL_CONTROL07 |       |       | NoAmplification |
| msrA-01       | BAL_CONTROL07 |       |       | NoAmplification |
| msrC-01       | BAL_CONTROL07 |       |       | NoAmplification |
| mtrC-01       | BAL_CONTROL07 |       |       | NoAmplification |
| mtrC-02       | BAL_CONTROL07 |       |       | NoAmplification |
| mtrD-02       | BAL_CONTRC    | 32.95 | 81.14 | 1.8             |
| mtrD-03       | BAL_CONTROL07 |       |       | NoAmplification |
| NDM1          | BAL_CONTROL07 |       |       | NoAmplification |
| nimE          | BAL_CONTROL07 |       |       | NoAmplification |
| nisB          | BAL_CONTROL07 |       |       | NoAmplification |
| oleC          | BAL_CONTROL07 |       |       | NoAmplification |
| oprD          | BAL_CONTRC    | 34.75 | 84.41 | 1.95            |
| oprJ          | BAL_CONTROL07 |       |       | NoAmplification |
| pbp           | BAL_CONTRC    | 35.98 | 80.09 | 1.89            |
| pbp2x         | BAL_CONTRC    | 26.23 | 75.63 | 1.78            |
| Pbp5          | BAL_CONTROL07 |       |       | NoAmplification |
| penA          | BAL_CONTROL07 |       |       | NoAmplification |
| pikR1         | BAL_CONTROL07 |       |       | NoAmplification |
| pikR2         | BAL_CONTRC    | 32.78 | 84.71 | 1.85            |
| pmrA          | BAL_CONTRC    | 27.38 | 79    | 1.96            |
| pncA          | BAL_CONTROL07 |       |       | NoAmplification |
| putative mulI | BAL_CONTROL07 |       |       | NoAmplification |
| qac           | BAL_CONTROL07 |       |       | NoAmplification |
| qacA          | BAL_CONTROL07 |       |       | NoAmplification |
| qacA/qacB     | BAL_CONTROL07 |       |       | NoAmplification |
| qacEdelta1-0  | BAL_CONTROL07 |       |       | NoAmplification |
| qacEdelta1-0  | BAL_CONTROL07 |       |       | NoAmplification |
| qacH-01       | BAL_CONTROL07 |       |       | NoAmplification |
| qacH-02       | BAL_CONTRC    | 38.66 | 84.21 | 1.56            |
| qnrA          | BAL_CONTROL07 |       |       | NoAmplification |

|              |               |       |       |      |                   |
|--------------|---------------|-------|-------|------|-------------------|
| rarD-02      | BAL_CONTROL07 |       |       |      | NoAmplification   |
| sat4         | BAL_CONTROL07 |       |       |      | NoAmplification   |
| sdeB         | BAL_CONTROL07 |       |       |      | NoAmplification   |
| spcN-01      | BAL_CONTROL07 |       |       |      | NoAmplification   |
| speA         | BAL_CONTROL07 |       |       |      | NoAmplification   |
| str          | BAL_CONTROL07 |       |       |      | NoAmplification   |
| strA         | BAL_CONTROL07 |       |       |      | NoAmplification   |
| strB         | BAL_CONTROL07 |       |       |      | NoAmplification   |
| sul1         | BAL_CONTROL07 |       |       |      | NoAmplification   |
| sul2         | BAL_CONTROL07 |       |       |      | NoAmplification   |
| sulA/foIP-01 | BAL_CONTRC    | 33.38 | 82.05 | 1.86 |                   |
| sulA/foIP-03 | BAL_CONTRC    | 26.88 | 83.64 | 1.96 |                   |
| tet(32)      | BAL_CONTRC    | 28.41 | 80.9  | 1.94 |                   |
| tet(34)      | BAL_CONTRC    | 30.07 | 75.71 | 1.98 |                   |
| tet(35)      | BAL_CONTRC    | 36.01 | 86.23 | 1.9  | MultipleMeltPeaks |
| tet(36)-A    | BAL_CONTROL07 |       |       |      | NoAmplification   |
| tet(36)-B    | BAL_CONTROL07 |       |       |      | NoAmplification   |
| tet(37)      | BAL_CONTRC    | 24.76 | 76.54 | 1.97 |                   |
| tetA-01      | BAL_CONTRC    | 33.95 | 85.03 | 1.94 |                   |
| tetA-02      | BAL_CONTROL07 |       |       |      | NoAmplification   |
| tetB-01      | BAL_CONTRC    | 40.48 | 76.63 | 1.72 |                   |
| tetB-02      | BAL_CONTROL07 |       |       |      | CurveFitFailed    |
| tetC-01      | BAL_CONTROL07 |       |       |      | NoAmplification   |
| tetC-02      | BAL_CONTROL07 |       |       |      | NoAmplification   |
| tetD-01      | BAL_CONTROL07 |       |       |      | NoAmplification   |
| tetD-02      | BAL_CONTRC    | 30.88 | 77.77 | 1.93 |                   |
| tetE         | BAL_CONTROL07 |       |       |      | NoAmplification   |
| tetG-01      | BAL_CONTROL07 |       |       |      | NoAmplification   |
| tetG-02      | BAL_CONTROL07 |       |       |      | NoAmplification   |
| tetH         | BAL_CONTROL07 |       |       |      | NoAmplification   |
| tetJ         | BAL_CONTRC    | 35.9  | 81.95 | 1.93 |                   |
| tetK         | BAL_CONTROL07 |       |       |      | NoAmplification   |
| tetL-01      | BAL_CONTROL07 |       |       |      | NoAmplification   |
| tetL-02      | BAL_CONTROL07 |       |       |      | NoAmplification   |
| tetM-01      | BAL_CONTRC    | 24.37 | 75.47 | 1.9  |                   |
| tetM-02      | BAL_CONTRC    | 24.68 | 77.3  | 1.93 |                   |
| tetO-01      | BAL_CONTRC    | 28.03 | 76.49 | 1.78 |                   |
| tetPA        | BAL_CONTROL07 |       |       |      | NoAmplification   |
| tetPB-01     | BAL_CONTROL07 |       |       |      | NoAmplification   |
| tetPB-02     | BAL_CONTROL07 |       |       |      | NoAmplification   |
| tetPB-03     | BAL_CONTROL07 |       |       |      | NoAmplification   |
| tetPB-05     | BAL_CONTROL07 |       |       |      | NoAmplification   |
| tetQ         | BAL_CONTRC    | 21.97 | 75.99 | 2.03 |                   |
| tetR-02      | BAL_CONTRC    | 35.02 | 89.21 | 1.76 |                   |
| tetR-03      | BAL_CONTRC    | 27.62 | 75.99 | 1.97 |                   |
| tetS         | BAL_CONTROL07 |       |       |      | NoAmplification   |



|             |               |       |       |      |                   |
|-------------|---------------|-------|-------|------|-------------------|
| tetT        | BAL_CONTROL07 |       |       |      | NoAmplification   |
| tetU-01     | BAL_CONTROL07 |       |       |      | NoAmplification   |
| tetV        | BAL_CONTROL07 |       |       |      | NoAmplification   |
| tetW-01     | BAL_CONTRC    | 26.93 | 81.3  | 1.77 |                   |
| tetX        | BAL_CONTROL07 |       |       |      | NoAmplification   |
| tnpA-01     | BAL_CONTROL07 |       |       |      | NoAmplification   |
| tnpA-02     | BAL_CONTROL07 |       |       |      | NoAmplification   |
| tnpA-03     | BAL_CONTROL07 |       |       |      | NoAmplification   |
| tnpA-04     | BAL_CONTROL07 |       |       |      | NoAmplification   |
| tnpA-05     | BAL_CONTROL07 |       |       |      | NoAmplification   |
| tnpA-07     | BAL_CONTROL07 |       |       |      | NoAmplification   |
| tolC-01     | BAL_CONTROL07 |       |       |      | NoAmplification   |
| tolC-02     | BAL_CONTRC    | 33.22 | 87.79 | 1.99 |                   |
| tolC-03     | BAL_CONTRC    | 34.43 | 83.72 | 1.91 | MultipleMeltPeaks |
| Tp614       | BAL_CONTROL07 |       |       |      | NoAmplification   |
| ttgA        | BAL_CONTRC    | 38.33 | 87.37 | 1.92 |                   |
| ttgB        | BAL_CONTRC    | 36.83 | 81.05 | 1.82 |                   |
| vanA        | BAL_CONTROL07 |       |       |      | NoAmplification   |
| vanB-01     | BAL_CONTRC    | 27.64 | 73.62 | 1.57 |                   |
| vanC-01     | BAL_CONTROL07 |       |       |      | NoAmplification   |
| vanC-02     | BAL_CONTROL07 |       |       |      | NoAmplification   |
| vanC-03     | BAL_CONTRC    | 35.48 | 77.53 | 1.88 | MultipleMeltPeaks |
| vanC1       | BAL_CONTROL07 |       |       |      | NoAmplification   |
| vanC2/vanC3 | BAL_CONTROL07 |       |       |      | NoAmplification   |
| vanG        | BAL_CONTROL07 |       |       |      | NoAmplification   |
| vanHB       | BAL_CONTROL07 |       |       |      | NoAmplification   |
| vanHD       | BAL_CONTROL07 |       |       |      | NoAmplification   |
| vanRA-01    | BAL_CONTROL07 |       |       |      | NoAmplification   |
| vanRA-02    | BAL_CONTROL07 |       |       |      | NoAmplification   |
| vanRB       | BAL_CONTROL07 |       |       |      | NoAmplification   |
| vanRC       | BAL_CONTROL07 |       |       |      | NoAmplification   |
| vanRC4      | BAL_CONTROL07 |       |       |      | NoAmplification   |
| vanRD       | BAL_CONTROL07 |       |       |      | NoAmplification   |
| vanSA       | BAL_CONTROL07 |       |       |      | NoAmplification   |
| vanSB       | BAL_CONTROL07 |       |       |      | NoAmplification   |
| vanSC-01    | BAL_CONTROL07 |       |       |      | NoAmplification   |
| vanSC-02    | BAL_CONTROL07 |       |       |      | NoAmplification   |
| vanTC-01    | BAL_CONTROL07 |       |       |      | NoAmplification   |
| vanTC-02    | BAL_CONTROL07 |       |       |      | NoAmplification   |
| vanTE       | BAL_CONTROL07 |       |       |      | NoAmplification   |
| vanTG       | BAL_CONTROL07 |       |       |      | NoAmplification   |
| vanWB       | BAL_CONTROL07 |       |       |      | NoAmplification   |
| vanWG       | BAL_CONTRC    | 33.61 | 74.43 | 1.97 |                   |
| vanXA       | BAL_CONTROL07 |       |       |      | NoAmplification   |
| vanXB       | BAL_CONTROL07 |       |       |      | NoAmplification   |
| vanXD       | BAL_CONTRC    | 30.64 | 75.52 | 1.92 |                   |

|              |               |       |       |      |                 |
|--------------|---------------|-------|-------|------|-----------------|
| vanYB        | BAL_CONTROL07 |       |       |      | NoAmplification |
| vanYD-01     | BAL_CONTROL07 |       |       |      | NoAmplification |
| vanYD-02     | BAL_CONTROL07 |       |       |      | NoAmplification |
| vatB-01      | BAL_CONTROL07 |       |       |      | NoAmplification |
| vatB-02      | BAL_CONTROL07 |       |       |      | NoAmplification |
| vatC-01      | BAL_CONTROL07 |       |       |      | NoAmplification |
| vatC-02      | BAL_CONTRC    | 38.54 | 83.43 | 1.75 |                 |
| vatE-01      | BAL_CONTRC    | 28.88 | 75.84 | 1.99 |                 |
| vatE-02      | BAL_CONTROL07 |       |       |      | NoAmplification |
| vgaA-01      | BAL_CONTROL07 |       |       |      | NoAmplification |
| vgaA-02      | BAL_CONTROL07 |       |       |      | NoAmplification |
| vgb-01       | BAL_CONTRC    | 37.73 | 74.87 | 1.86 |                 |
| vgbB-01      | BAL_CONTROL07 |       |       |      | NoAmplification |
| vgbB-02      | BAL_CONTROL07 |       |       |      | NoAmplification |
| yceE/mdtG-0  | BAL_CONTROL07 |       |       |      | NoAmplification |
| yceE/mdtG-0  | BAL_CONTROL07 |       |       |      | NoAmplification |
| yceL/mdtH-0  | BAL_CONTROL07 |       |       |      | NoAmplification |
| yceL/mdtH-0  | BAL_CONTROL07 |       |       |      | NoAmplification |
| yceL/mdtH-0  | BAL_CONTROL07 |       |       |      | NoAmplification |
| yidY/mdtL-01 | BAL_CONTRC    | 35.4  | 82.11 | 1.91 |                 |
| yidY/mdtL-02 | BAL_CONTROL07 |       |       |      | NoAmplification |

| Assay          | Sample | Ct    | Tm    | Efficiency | Flags           |
|----------------|--------|-------|-------|------------|-----------------|
| 16S rRNA       | NTC    |       | 27.05 | 81.76      | 1.97            |
| aac            | NTC    |       |       |            | NoAmplification |
| aac(6')-Ib(akz | NTC    |       |       |            | NoAmplification |
| aac(6')-Ib(akz | NTC    |       |       |            | NoAmplification |
| aac(6')-Ib(akz | NTC    |       |       |            | NoAmplification |
| aac(6')-II     | NTC    |       |       |            | NoAmplification |
| aac(6')I1      | NTC    |       |       |            | NoAmplification |
| aacA/aphD      | NTC    |       |       |            | NoAmplification |
| aacC           | NTC    |       |       |            | NoAmplification |
| aacC1          | NTC    |       |       |            | NoAmplification |
| aacC2          | NTC    |       |       |            | NoAmplification |
| aacC4          | NTC    |       |       |            | NoAmplification |
| aadA-01        | NTC    |       |       |            | NoAmplification |
| aadA-02        | NTC    |       |       |            | NoAmplification |
| aadA-1-01      | NTC    |       |       |            | NoAmplification |
| aadA-1-02      | NTC    |       |       |            | NoAmplification |
| aadA1          | NTC    |       |       |            | NoAmplification |
| aadA2-01       | NTC    |       |       |            | NoAmplification |
| aadA2-02       | NTC    |       |       |            | NoAmplification |
| aadA2-03       | NTC    |       |       |            | NoAmplification |
| aadA5-01       | NTC    |       |       |            | NoAmplification |
| aadA5-02       | NTC    |       |       |            | NoAmplification |
| aadA9-01       | NTC    |       |       |            | NoAmplification |
| aadA9-02       | NTC    |       |       |            | NoAmplification |
| aadD           | NTC    |       |       |            | NoAmplification |
| aadE           | NTC    |       |       |            | NoAmplification |
| acrA-01        | NTC    |       |       |            | NoAmplification |
| acrA-02        | NTC    |       |       |            | NoAmplification |
| acrA-03        | NTC    |       |       |            | NoAmplification |
| acrA-04        | NTC    |       |       |            | NoAmplification |
| acrA-05        | NTC    |       |       |            | NoAmplification |
| acrB-01        | NTC    | 37.46 | 75.74 | 1.92       |                 |
| acrF           | NTC    |       |       |            | NoAmplification |
| acrR-01        | NTC    |       |       |            | NoAmplification |
| acrR-02        | NTC    |       |       |            | NoAmplification |
| Actin          | NTC    |       |       |            | NoAmplification |
| adeA           | NTC    |       |       |            | NoAmplification |
| ampC-01        | NTC    |       |       |            | NoAmplification |
| ampC-02        | NTC    |       |       |            | NoAmplification |
| ampC-04        | NTC    |       |       |            | NoAmplification |
| ampC-05        | NTC    |       |       |            | NoAmplification |
| ampC-06        | NTC    |       |       |            | NoAmplification |
| ampC-07        | NTC    |       |       |            | NoAmplification |
| ampC-09        | NTC    |       |       |            | NoAmplification |
| ampC/blaDH     | NTC    |       |       |            | NoAmplification |

|                          |     |       |       |      |                 |
|--------------------------|-----|-------|-------|------|-----------------|
| aph                      | NTC |       |       |      | NoAmplification |
| aph(2')-Id-01            | NTC |       |       |      | NoAmplification |
| aph(2')-Id-02            | NTC |       |       |      | NoAmplification |
| aph6ia                   | NTC |       |       |      | NoAmplification |
| aphA1(aka k <sub>z</sub> | NTC |       |       |      | NoAmplification |
| bacA-01                  | NTC |       |       |      | NoAmplification |
| bacA-02                  | NTC |       |       |      | NoAmplification |
| BETA-globin              | NTC |       |       |      | CurveFitFailed  |
| bla-ACC-1                | NTC |       |       |      | NoAmplification |
| bla-L1                   | NTC |       |       |      | NoAmplification |
| bla1                     | NTC |       |       |      | NoAmplification |
| blaCMY                   | NTC |       |       |      | NoAmplification |
| blaCMY2-01               | NTC |       |       |      | NoAmplification |
| blaCMY2-02               | NTC |       |       |      | NoAmplification |
| blaCTX-M-01              | NTC |       |       |      | NoAmplification |
| blaCTX-M-02              | NTC |       |       |      | NoAmplification |
| blaCTX-M-03              | NTC |       |       |      | NoAmplification |
| blaCTX-M-04              | NTC |       |       |      | NoAmplification |
| blaCTX-M-05              | NTC |       |       |      | NoAmplification |
| blaCTX-M-06              | NTC |       |       |      | NoAmplification |
| blaGES                   | NTC |       |       |      | NoAmplification |
| blaIMP-01                | NTC |       |       |      | NoAmplification |
| blaIMP-02                | NTC |       |       |      | NoAmplification |
| blaMOX/blaC              | NTC |       |       |      | NoAmplification |
| blaOCH                   | NTC |       |       |      | NoAmplification |
| blaOKP                   | NTC |       |       |      | NoAmplification |
| blaOXA1/blaC             | NTC |       |       |      | NoAmplification |
| blaOXA10-01              | NTC |       |       |      | NoAmplification |
| blaOXA10-02              | NTC |       |       |      | NoAmplification |
| blaOXY                   | NTC |       |       |      | NoAmplification |
| blaPAO                   | NTC |       |       |      | NoAmplification |
| blaPER                   | NTC |       |       |      | NoAmplification |
| blaPSE                   | NTC |       |       |      | NoAmplification |
| blaROB                   | NTC |       |       |      | NoAmplification |
| blaSFO                   | NTC |       |       |      | NoAmplification |
| blaSHV-01                | NTC |       |       |      | NoAmplification |
| blaSHV-02                | NTC |       |       |      | NoAmplification |
| blaTEM                   | NTC |       |       |      | NoAmplification |
| blaTLA                   | NTC |       |       |      | NoAmplification |
| blaVEB                   | NTC |       |       |      | NoAmplification |
| blaVIM                   | NTC |       |       |      | NoAmplification |
| blaZ                     | NTC |       |       |      | NoAmplification |
| carB                     | NTC |       |       |      | NoAmplification |
| catA1                    | NTC |       |       |      | NoAmplification |
| catB3                    | NTC | 31.47 | 77.05 | 1.98 |                 |
| catB8                    | NTC |       |       |      | NoAmplification |

|                |            |              |              |             |                             |
|----------------|------------|--------------|--------------|-------------|-----------------------------|
| ceoA           | NTC        |              |              |             | NoAmplification             |
| cepA           | NTC        |              |              |             | NoAmplification             |
| cfiA           | NTC        |              |              |             | NoAmplification             |
| cfr            | NTC        |              |              |             | NoAmplification             |
| cfxA           | NTC        | 33.6         | 74.2         | 2.1         |                             |
| cmeA           | NTC        |              |              |             | NoAmplification             |
| cmlA1-01       | NTC        |              |              |             | NoAmplification             |
| cmlA1-02       | NTC        |              |              |             | NoAmplification             |
| cmr            | NTC        |              |              |             | NoAmplification             |
| cmx(A)         | NTC        |              |              |             | NoAmplification             |
| cphA-01        | NTC        |              |              |             | NoAmplification             |
| cphA-02        | NTC        |              |              |             | NoAmplification             |
| dfrA1          | NTC        |              |              |             | NoAmplification             |
| dfrA12         | NTC        |              |              |             | NoAmplification             |
| emrD           | NTC        |              |              |             | NoAmplification             |
| ereA           | NTC        |              |              |             | NoAmplification             |
| ereB           | NTC        |              |              |             | NoAmplification             |
| erm(34)        | NTC        |              |              |             | NoAmplification             |
| erm(35)        | NTC        |              |              |             | NoAmplification             |
| erm(36)        | NTC        |              |              |             | NoAmplification             |
| ermA           | NTC        |              |              |             | NoAmplification             |
| ermA/ermTR     | NTC        |              |              |             | NoAmplification             |
| ermB           | NTC        |              |              |             | NoAmplification             |
| ermC           | NTC        |              |              |             | NoAmplification             |
| ermF           | NTC        |              |              |             | NoAmplification             |
| ermJ/ermD      | NTC        |              |              |             | NoAmplification             |
| <b>ermK-01</b> | <b>NTC</b> | <b>30.69</b> | <b>75.07</b> | <b>2.01</b> |                             |
| ermK-02        | NTC        |              |              |             | NoAmplification             |
| ermT-01        | NTC        |              |              |             | NoAmplification             |
| ermT-02        | NTC        |              |              |             | NoAmplification             |
| ermX           | NTC        |              |              |             | NoAmplification             |
| ermY           | NTC        |              |              |             | NoAmplification             |
| fabK           | NTC        |              |              |             | NoAmplification             |
| floR           | NTC        |              |              |             | NoAmplification             |
| folA           | NTC        |              |              |             | NoAmplification             |
| fosB           | NTC        |              |              |             | LowEfficiency, CtlSmall, Sε |
| fosX           | NTC        |              |              |             | NoAmplification             |
| fox5           | NTC        |              |              |             | NoAmplification             |
| imiR           | NTC        |              |              |             | NoAmplification             |
| ImrA-01        | NTC        |              |              |             | NoAmplification             |
| intl           | NTC        |              |              |             | NoAmplification             |
| <b>intl1</b>   | <b>NTC</b> | <b>24.51</b> | <b>81.61</b> | <b>1.93</b> |                             |
| IS613          | NTC        |              |              |             | NoAmplification             |
| lnuA-01        | NTC        |              |              |             | NoAmplification             |
| lnuB-01        | NTC        |              |              |             | NoAmplification             |
| lnuB-02        | NTC        |              |              |             | NoAmplification             |

|               |     |       |       |      |                 |
|---------------|-----|-------|-------|------|-----------------|
| lnuC          | NTC |       |       |      | NoAmplification |
| marR-01       | NTC |       |       |      | NoAmplification |
| matA/mel      | NTC |       |       |      | NoAmplification |
| mdet1         | NTC |       |       |      | NoAmplification |
| mdtA          | NTC |       |       |      | NoAmplification |
| mdtE/yhiU     | NTC |       |       |      | NoAmplification |
| mecA          | NTC |       |       |      | NoAmplification |
| mefA          | NTC | 36.36 | 73.82 | 1.94 |                 |
| mepA          | NTC |       |       |      | NoAmplification |
| mexA          | NTC |       |       |      | NoAmplification |
| mexD          | NTC |       |       |      | NoAmplification |
| mexE          | NTC |       |       |      | NoAmplification |
| mexF          | NTC |       |       |      | NoAmplification |
| mphA-01       | NTC |       |       |      | NoAmplification |
| mphA-02       | NTC | 33.8  | 76.64 | 1.99 |                 |
| mphB          | NTC |       |       |      | NoAmplification |
| mphC          | NTC |       |       |      | NoAmplification |
| msrA-01       | NTC |       |       |      | NoAmplification |
| msrC-01       | NTC | 36.27 | 73.2  | 1.95 |                 |
| mtrC-01       | NTC |       |       |      | NoAmplification |
| mtrC-02       | NTC |       |       |      | NoAmplification |
| mtrD-02       | NTC |       |       |      | NoAmplification |
| mtrD-03       | NTC |       |       |      | NoAmplification |
| NDM1          | NTC |       |       |      | NoAmplification |
| nimE          | NTC |       |       |      | NoAmplification |
| nisB          | NTC |       |       |      | NoAmplification |
| oleC          | NTC |       |       |      | NoAmplification |
| oprD          | NTC |       |       |      | NoAmplification |
| oprJ          | NTC |       |       |      | NoAmplification |
| pbp           | NTC |       |       |      | NoAmplification |
| pbp2x         | NTC |       |       |      | NoAmplification |
| Pbp5          | NTC |       |       |      | NoAmplification |
| penA          | NTC |       |       |      | NoAmplification |
| pikR1         | NTC |       |       |      | NoAmplification |
| pikR2         | NTC |       |       |      | NoAmplification |
| pmrA          | NTC |       |       |      | NoAmplification |
| pncA          | NTC |       |       |      | NoAmplification |
| putative mulI | NTC |       |       |      | NoAmplification |
| qac           | NTC |       |       |      | NoAmplification |
| qacA          | NTC |       |       |      | NoAmplification |
| qacA/qacB     | NTC |       |       |      | NoAmplification |
| qacEdelta1-0  | NTC |       |       |      | NoAmplification |
| qacEdelta1-0  | NTC | 29.99 | 76.24 | 1.95 |                 |
| qacH-01       | NTC |       |       |      | NoAmplification |
| qacH-02       | NTC |       |       |      | NoAmplification |
| qnrA          | NTC |       |       |      | NoAmplification |

|              |     |       |       |      |                 |
|--------------|-----|-------|-------|------|-----------------|
| rarD-02      | NTC |       |       |      | NoAmplification |
| sat4         | NTC |       |       |      | NoAmplification |
| sdeB         | NTC |       |       |      | NoAmplification |
| spcN-01      | NTC |       |       |      | NoAmplification |
| speA         | NTC |       |       |      | NoAmplification |
| str          | NTC |       |       |      | NoAmplification |
| strA         | NTC |       |       |      | NoAmplification |
| strB         | NTC |       |       |      | NoAmplification |
| sul1         | NTC |       |       |      | NoAmplification |
| sul2         | NTC |       |       |      | NoAmplification |
| sulA/foIP-01 | NTC |       |       |      | NoAmplification |
| sulA/foIP-03 | NTC | 32.64 | 74.1  | 1.71 |                 |
| tet(32)      | NTC |       |       |      | NoAmplification |
| tet(34)      | NTC | 30.39 | 75.34 | 1.98 |                 |
| tet(35)      | NTC |       |       |      | NoAmplification |
| tet(36)-A    | NTC |       |       |      | NoAmplification |
| tet(36)-B    | NTC |       |       |      | NoAmplification |
| tet(37)      | NTC |       |       |      | NoAmplification |
| tetA-01      | NTC |       |       |      | NoAmplification |
| tetA-02      | NTC |       |       |      | NoAmplification |
| tetB-01      | NTC |       |       |      | NoAmplification |
| tetB-02      | NTC | 36.4  | 77.16 | 1.94 |                 |
| tetC-01      | NTC |       |       |      | NoAmplification |
| tetC-02      | NTC |       |       |      | NoAmplification |
| tetD-01      | NTC |       |       |      | NoAmplification |
| tetD-02      | NTC | 29    | 76.94 | 2.02 |                 |
| tetE         | NTC |       |       |      | NoAmplification |
| tetG-01      | NTC |       |       |      | NoAmplification |
| tetG-02      | NTC |       |       |      | NoAmplification |
| tetH         | NTC |       |       |      | NoAmplification |
| tetJ         | NTC |       |       |      | NoAmplification |
| tetK         | NTC |       |       |      | NoAmplification |
| tetL-01      | NTC |       |       |      | NoAmplification |
| tetL-02      | NTC |       |       |      | NoAmplification |
| tetM-01      | NTC |       |       |      | NoAmplification |
| tetM-02      | NTC |       |       |      | NoAmplification |
| tetO-01      | NTC |       |       |      | NoAmplification |
| tetPA        | NTC |       |       |      | NoAmplification |
| tetPB-01     | NTC |       |       |      | NoAmplification |
| tetPB-02     | NTC | 34.69 | 76.24 | 2.03 |                 |
| tetPB-03     | NTC |       |       |      | NoAmplification |
| tetPB-05     | NTC |       |       |      | NoAmplification |
| tetQ         | NTC |       |       |      | NoAmplification |
| tetR-02      | NTC |       |       |      | NoAmplification |
| tetR-03      | NTC |       |       |      | NoAmplification |
| tetS         | NTC |       |       |      | NoAmplification |

|             |     |       |       |      |                 |
|-------------|-----|-------|-------|------|-----------------|
| tetT        | NTC |       |       |      | NoAmplification |
| tetU-01     | NTC |       |       |      | NoAmplification |
| tetV        | NTC |       |       |      | NoAmplification |
| tetW-01     | NTC |       |       |      | NoAmplification |
| tetX        | NTC |       |       |      | NoAmplification |
| tnpA-01     | NTC |       |       |      | NoAmplification |
| tnpA-02     | NTC |       |       |      | NoAmplification |
| tnpA-03     | NTC | 33.12 | 74.7  | 2.08 |                 |
| tnpA-04     | NTC |       |       |      | NoAmplification |
| tnpA-05     | NTC |       |       |      | NoAmplification |
| tnpA-07     | NTC |       |       |      | NoAmplification |
| tolC-01     | NTC |       |       |      | NoAmplification |
| tolC-02     | NTC |       |       |      | NoAmplification |
| tolC-03     | NTC |       |       |      | NoAmplification |
| Tp614       | NTC |       |       |      | NoAmplification |
| ttgA        | NTC |       |       |      | NoAmplification |
| ttgB        | NTC |       |       |      | NoAmplification |
| vanA        | NTC |       |       |      | NoAmplification |
| vanB-01     | NTC | 27.12 | 72.95 | 1.63 |                 |
| vanC-01     | NTC |       |       |      | NoAmplification |
| vanC-02     | NTC |       |       |      | NoAmplification |
| vanC-03     | NTC |       |       |      | NoAmplification |
| vanC1       | NTC |       |       |      | NoAmplification |
| vanC2/vanC3 | NTC |       |       |      | NoAmplification |
| vanG        | NTC |       |       |      | NoAmplification |
| vanHB       | NTC |       |       |      | NoAmplification |
| vanHD       | NTC |       |       |      | NoAmplification |
| vanRA-01    | NTC |       |       |      | NoAmplification |
| vanRA-02    | NTC |       |       |      | NoAmplification |
| vanRB       | NTC |       |       |      | NoAmplification |
| vanRC       | NTC |       |       |      | NoAmplification |
| vanRC4      | NTC |       |       |      | NoAmplification |
| vanRD       | NTC |       |       |      | NoAmplification |
| vanSA       | NTC |       |       |      | NoAmplification |
| vanSB       | NTC |       |       |      | NoAmplification |
| vanSC-01    | NTC |       |       |      | NoAmplification |
| vanSC-02    | NTC |       |       |      | NoAmplification |
| vanTC-01    | NTC |       |       |      | NoAmplification |
| vanTC-02    | NTC |       |       |      | NoAmplification |
| vanTE       | NTC |       |       |      | NoAmplification |
| vanTG       | NTC |       |       |      | NoAmplification |
| vanWB       | NTC |       |       |      | NoAmplification |
| vanWG       | NTC | 36.56 | 74.06 | 1.89 |                 |
| vanXA       | NTC | 37.31 | 72.52 | 1.83 |                 |
| vanXB       | NTC |       |       |      | NoAmplification |
| vanXD       | NTC | 30.69 | 74.54 | 1.94 |                 |



|                |            |              |       |                          |
|----------------|------------|--------------|-------|--------------------------|
| vanYB          | NTC        |              |       | NoAmplification          |
| vanYD-01       | NTC        |              |       | CurveFitFailed, TmANTCPD |
| vanYD-02       | NTC        |              |       | NoAmplification          |
| vatB-01        | NTC        |              |       | NoAmplification          |
| vatB-02        | NTC        |              |       | NoAmplification          |
| vatC-01        | NTC        |              |       | NoAmplification          |
| vatC-02        | NTC        |              |       | NoAmplification          |
| <b>vatE-01</b> | <b>NTC</b> | <b>29.55</b> | 76.5  | 2.05                     |
| vatE-02        | NTC        |              |       | NoAmplification          |
| vgaA-01        | NTC        | 38.62        | 75.62 | 1.82                     |
| vgaA-02        | NTC        |              |       | NoAmplification          |
| vgb-01         | NTC        |              |       | NoAmplification          |
| vgbB-01        | NTC        |              |       | NoAmplification          |
| vgbB-02        | NTC        |              |       | NoAmplification          |
| yceE/mdtG-0    | NTC        |              |       | NoAmplification          |
| yceE/mdtG-0    | NTC        |              |       | NoAmplification          |
| yceL/mdtH-0    | NTC        |              |       | NoAmplification          |
| yceL/mdtH-0    | NTC        |              |       | NoAmplification          |
| yceL/mdtH-0    | NTC        |              |       | NoAmplification          |
| yidY/mdtL-01   | NTC        |              |       | NoAmplification          |
| yidY/mdtL-02   | NTC        |              |       | NoAmplification          |





aturationBaselineRatiolsLow, CurveFitFailed
